# Supplementary material for: The ∼16 kDa C-Terminal Sequence of Clathrin Assembly Protein AP180 Is Essential for Efficient Clathrin Binding
Source: PLoS One. 2014 Oct 20;9(10):e110557. doi: 10.1371/journal.pone.0110557 (PMC4203807; doi:10.1371/journal.pone.0110557)
Supplement: Data S2 — Contains the tabulated output of the MaxQuant software from processing the LC-MS/MS data of the tryptic digestion of purified clathrin. (ZIP) [file pone.0110557.s003.zip]

Archive with 16 entries (16 files):
- txt/aifMsms.txt
- txt/allPeptides.txt
- txt/Deamidation (NQ)Sites.txt
- txt/evidence.txt
- txt/matchedFeatures.txt
- txt/modificationSpecificPeptides.txt
- txt/msms.txt
- txt/msmsScans.txt
- txt/msScans.txt
- txt/mzRange.txt
- txt/Oxidation (M)Sites.txt
- txt/parameters.txt
- txt/peptides.txt
- txt/proteinGroups.txt
- txt/summary.txt
- txt/tables.pdf
