# Supplementary material for: The ∼16 kDa C-Terminal Sequence of Clathrin Assembly Protein AP180 Is Essential for Efficient Clathrin Binding
Source: PLoS One. 2014 Oct 20;9(10):e110557. doi: 10.1371/journal.pone.0110557 (PMC4203807; doi:10.1371/journal.pone.0110557)
Supplement: Data S2 — Contains the tabulated output of the MaxQuant software from processing the LC-MS/MS data of the tryptic digestion of purified clathrin. (ZIP) [file pone.0110557.s003.zip › txt/allPeptides.txt]

Raw file	Type	Charge	m/z	Mass	Resolution	Number of data points	Number of scans	Number of isotopic peaks	PIF	Mass fractional part	Mass deficit	Mass precision [ppm]	Max intensity m/z 0	Retention time	Retention Length	Retention Length (FWHM)	Min scan number	Max scan number	Identified	MS/MS IDs	Sequence	Length	Modifications	Modified sequence	Proteins	Score	Intensity	Intensities	MS/MS Count	MSMS Scan Numbers	MSMS Precursors	MSMS Isotope Indices
20140904-PurClathDigest-1ug-01	MULTI	1	301.13565	300.12838	NaN	12	9	2	NaN	0.128377	-0.0496824601875119	5.692341	301.132301210543	2.164	6.47	0	192	202		-1		0				NaN	3565.8	0;1467.473;994.0463;633.6919;1546.95;3809.131;2974.81;3499.027;569.5274;1192.02;0	0
20140904-PurClathDigest-1ug-01	MULTI	1	301.14155	300.13428	25537.505859375	9	5	2	NaN	0.134278	-0.0437833890437105	3.121017	301.141545834354	3.642	4.395	0	321	327		-1		0				NaN	4475.2	0;487.1901;2495.391;4391.339;2314.705;3674.177;0	0
20140904-PurClathDigest-1ug-01	MULTI	1	300.05844	299.05117	39443.08984375	166	105	2	NaN	0.051166	-0.126397322540527	2.161295	300.060753644486	1.212	69.89	0	50	156		-1		0				NaN	7880.2	0;3479.358;3410.064;2214.853;6669.92;3152.517;3844.332;3344.486;2961.16;4269.794;4313.409;4105.895;2351.937;4644.903;3665.652;4455.002;3179.879;2485.371;2321.969;3572.855;5625.565;5193.371;3995.392;3501.274;3597.728;3789.589;3868.905;3665.171;3850.826;4029.513;3847.685;4421.26;3911.802;1387.952;3149.463;4154.29;4047.263;4096.164;3815.097;6264.706;8566.44;7592.311;6512.979;6826.278;7088.429;9320.7…	0
20140904-PurClathDigest-1ug-01	MULTI	1	317.04532	316.03804	NaN	5	3	2	NaN	0.038044	-0.147333315134063	2.977194	317.045614741039	5.049	2.6	0	448	452		-1		0				NaN	1485.7	0;1423.979;1177.889;1257.521;0	0
20140904-PurClathDigest-1ug-01	MULTI	1	311.31308	310.3058	38220.27734375	5	3	2	NaN	0.305803	0.123061929929634	1.74245	311.31307539683	5.205	2.529	0	462	466		-1		0				NaN	11062	0;862.3643;10854.42;9164.552;0	0
20140904-PurClathDigest-1ug-01	MULTI	1	311.1544	310.14712	NaN	7	6	2	NaN	0.14712	-0.0355476964828085	3.202675	311.152364596702	5.686	5.775	0	498	505		-1		0				NaN	1178.7	0;410.9567;373.4148;335.8729;836.6559;1156.667;0;0	0
20140904-PurClathDigest-1ug-01	MULTI	6	310.96757	1859.7617	28054.1796875	12	11	2	NaN	0.761736	-0.133754017813089	2.7792	311.134349442876	5.864	10.695	0	508	520		-1		0				NaN	3386.4	0;1138.1;772.2179;406.3362;208.5471;501.1762;1185.151;970.9055;756.6604;372.4249;0;0;0	0
20140904-PurClathDigest-1ug-01	MULTI	1	311.15498	310.14771	38902.80859375	28	19	2	NaN	0.147707	-0.0349608073870513	4.13804	311.152590123214	6.035	17.88	0	515	535		-1		0				NaN	2061.6	0;331.9538;468.9874;766.4331;659.5685;785.6323;961.4733;1534.836;883.5829;834.9739;947.3497;1398.043;796.6854;1309.997;1733.414;2022.973;1059.02;473.5194;600.6227;0;0	0
20140904-PurClathDigest-1ug-01	MULTI	7	304.01763	2121.0725	NaN	14	14	2	NaN	0.072459	0.0567661422296624	2.121141	304.160871014001	6.183	13.125	0	528	543		-1		0				NaN	2948.8	0;341.6901;330.0508;318.4115;269.4621;977.102;937.755;1328.381;1040.053;1072.802;424.0913;445.3314;0;0;0;0	0
20140904-PurClathDigest-1ug-01	MULTI	4	312.95298	1247.7828	NaN	14	10	2	NaN	0.782802	0.168822013474255	2.932321	313.204351757242	6.2	9.655	0	533	544		-1		0				NaN	1903.3	0;993.001;1280.466;1077.515;742.8567;518.0811;598.1074;318.6282;334.7632;350.8983;0;0	0
20140904-PurClathDigest-1ug-01	MULTI	4	312.95254	1247.7811	NaN	6	4	2	NaN	0.78107	0.167090727245295	4.28736	312.95133503714	6.455	4.385	0	552	557		-1		0				NaN	1115.8	0;509.9628;1031.092;752.6697;520.0178;0	0
20140904-PurClathDigest-1ug-01	MULTI	7	313.13045	2184.8622	40405.67578125	8	7	2	NaN	0.862234	-0.182803051258816	3.024577	313.273263833683	6.652	7.13	0	565	573		-1		0				NaN	1705.6	0;647.2047;1026.74;1066.907;235.4881;211.9124;188.3368;0;0	0
20140904-PurClathDigest-1ug-01	MULTI	2	316.554	631.09345	39789.3046875	20	17	2	NaN	0.093452	-0.23685083426858	3.800494	316.555413429918	6.642	15.965	0	556	574		-1		0				NaN	1339.6	0;585.7922;515.8905;445.9889;284.5019;268.6207;252.7396;594.7002;926.6445;437.538;550.9454;1177.484;979.3394;1107.282;1308.869;429.1513;568.1716;0;0	0
20140904-PurClathDigest-1ug-01	MULTI	2	313.11338	624.21221	37439.546875	42	28	2	NaN	0.212208	-0.114929256047731	0.868705	313.113484228768	6.61	25.49	0	550	579		-1		0				NaN	3146.4	0;922.548;1541.952;1193.943;1271.763;1290.709;1915.888;1169.728;1121.864;2139.5;2023.143;2967.401;1174.898;1976.858;1660.182;2754.36;1916.999;2512.573;1655.236;2788.412;2082.741;2128.639;2298.209;1393.256;1322.756;1694.595;1261.371;1797.786;954.7256;0	0
20140904-PurClathDigest-1ug-01	MULTI	1	312.16224	311.15497	36154.01171875	54	35	2	NaN	0.154967	-0.028163893698661	3.084923	312.161018550651	6.611	31.465	0	545	581		-1		0				NaN	2949.8	0;797.1184;592.4376;737.1755;553.8686;370.5617;355.5034;814.742;835.3472;1088.302;1237.076;1118.079;1423.172;772.7502;1079.663;1386.576;1289.085;1429.207;1376.496;1703.008;1614.101;929.5115;1501.181;1303.523;1855.785;1008.904;1042.373;1193.705;1887.036;2894.552;1536.901;363.1177;0;0;0;0;0	0
20140904-PurClathDigest-1ug-01	MULTI	1	305.05191	304.04464	37270.33203125	53	40	3	NaN	0.044637	-0.135223260507473	0.611989	305.05139107956	6.825	36.225	0	554	595		-1		0				NaN	13015	0;2753.869;4060.454;2394.904;2757.685;3178.201;3263.847;6118.367;1976.54;1071.279;2071.476;3621.815;3715.976;4415.726;1729.452;2785.966;3402.137;2821.604;3662.796;1992.471;3199.034;2330.857;4737.776;1641.877;3845.81;6659.458;1927.173;3652.365;7678.86;5466.78;6911.626;6581.042;12110.67;6466.604;11006.88;12993.07;5957.255;12260.73;5017.491;7190.253;2673.217;0	0
20140904-PurClathDigest-1ug-01	MULTI	1	312.16248	311.1552	39463.93359375	18	10	2	NaN	0.155201	-0.0279308132090819	3.955743	312.161222298439	6.921	9.89	0	581	592		-1		0				NaN	1800.6	0;1138.704;1444.757;1191.236;1963.322;1918.278;1863.485;1978.099;1438.414;2078.719;0;0	0
20140904-PurClathDigest-1ug-01	MULTI	3	314.15753	939.45075	39329.76171875	64	47	2	NaN	0.450753	-0.0213940730013746	0.581624	314.157432039175	7.01	42.405	0	571	619		-1		0				NaN	4804.2	0;505.0129;913.788;1065.667;1618.452;1208.652;2954.866;1854.217;1405.079;2710.464;3000.031;1340.885;878.1311;1369.76;2906.969;1804.999;2399.857;3082.683;2569.645;2289.051;1901.705;1504.129;2050.915;1551.862;1256.362;1596.164;2409.22;1667.773;975.7778;1094.787;1080.179;1136.963;1140.125;1090.215;570.2143;1024.814;1547.688;939.6697;1709.016;587.2986;1627.888;975.3242;1550.128;1020.967;2394.379;941.…	0
20140904-PurClathDigest-1ug-01	MULTI	2	316.55434	631.09413	38367.60546875	10	7	2	NaN	0.094127	-0.236176385108479	4.029632	316.555583343621	7.221	7.285	0	602	610		-1		0				NaN	2164.4	0;300.3668;567.8998;989.0216;1050.989;1512.273;2023.976;1207.165;0	0
20140904-PurClathDigest-1ug-01	MULTI	2	316.55406	631.09357	38367.57421875	5	3	2	NaN	0.093565	-0.236737707365137	3.670966	316.554564667799	7.299	3.655	0	610	614		-1		0				NaN	1668.9	0;1154.443;1219.649;868.1069;0	0
20140904-PurClathDigest-1ug-01	MULTI	6	308.9538	1847.6792	NaN	5	3	2	NaN	0.679157	-0.210775088101627	3.611198	309.12053640268	7.363	3.47	0	614	618		-1		0				NaN	2307.1	0;535.7416;843.2245;1547.481;0	0
20140904-PurClathDigest-1ug-01	MULTI	1	305.05146	304.04418	36644.9375	53	31	2	NaN	0.044184	-0.135676596825704	0.597892	305.051425027631	7.301	29.18	0	595	629		-1		0				NaN	21167	0;3414.368;4488.421;7085.315;10262.99;7990.208;9321.776;12396.37;3420.386;7552.206;4693.063;11093.01;10631.38;7722.07;8290.77;8123.032;9399.158;10374.91;7742.32;6878.936;20770.38;13702.2;14387.42;13939.91;1925.788;10515.77;12278.49;9139.153;10684.4;8084.648;4200.101;6271.733;0	0
20140904-PurClathDigest-1ug-01	MULTI	4	312.9528	1247.7821	NaN	15	12	2	NaN	0.782094	0.168114018142205	3.134711	313.204073454564	7.487	12.26	0	618	633		-1		0				NaN	2108.7	0;975.3879;857.9978;740.6077;685.8001;794.8328;1124.171;506.974;462.4082;417.8425;898.4169;0;0;0	0
20140904-PurClathDigest-1ug-01	MULTI	6	308.95356	1847.6777	NaN	17	11	2	NaN	0.677713	-0.212218731044914	2.901459	309.120164775096	7.655	10.915	0	630	642		-1		0				NaN	2354.3	0;447.1895;356.6824;375.5591;386.9013;956.827;670.8161;1285.747;1579.119;760.5405;664.9194;477.2277;0	0
20140904-PurClathDigest-1ug-01	MULTI	7	313.16695	2185.1177	34230.6875	53	38	2	NaN	0.117712	0.0725578485580627	1.443339	313.309648653618	7.488	35.965	0	606	647		-1		0				NaN	6875.9	0;366.3008;374.8232;584.2443;576.7565;709.9784;1261.474;1385.307;1978.287;998.7454;905.7567;2068.435;2104.036;3131.571;1396.227;853.9438;1212.563;1454.049;1754.605;2499.719;1705.513;1726.997;1308.955;1124.248;1222.987;534.9672;538.9433;604.2866;949.3607;1054.293;1159.226;631.3661;414.029;576.2499;669.7178;885.8453;902.6172;397.1469;0;0	0
20140904-PurClathDigest-1ug-01	MULTI	1	305.05155	304.04428	37327.34765625	57	40	2	NaN	0.044278	-0.135582331715511	0.583933	305.051499015071	7.793	37.64	0	628	669		-1		0				NaN	16153	0;1171.112;5025.132;8050.973;7851.19;14154.64;7969.182;15855.3;13212.98;15693.27;13660.37;11059.22;13213.2;7852.367;14079.92;10225.17;7269.342;12726.14;15849.94;6409.621;5817.883;9559.969;9568.024;9449.188;7033.834;2530.737;9347.634;10206.91;3374.722;4490.014;7970.414;5956.651;6703.936;5909.641;3668.982;9502.838;5448.18;9308.508;6379.249;5250.22;4006.686;0	0
20140904-PurClathDigest-1ug-01	MULTI	2	313.1133	624.21204	34210.39453125	48	30	2	NaN	0.212037	-0.115100455793367	0.908509	313.113472680256	7.653	28.89	0	618	651		-1		0				NaN	3376	0;253.7609;1690.068;786.6522;1514.963;1314.53;1083.795;1263.791;2380.434;2406.67;2297.479;2094.905;1091.146;2800.493;2115.257;1915.752;2338.95;2893.837;2492.714;2508.159;2114.905;1839.279;3183.912;1812.797;1801.289;3474.816;2175.037;1348.638;1291.561;0;0;0	0
20140904-PurClathDigest-1ug-01	MULTI	7	304.0174	2121.0708	36211.0234375	44	35	2	NaN	0.070848	0.0551551579687839	1.761214	304.017129887073	7.847	33.02	0	629	665		-1		0				NaN	2628.4	0;450.8834;760.2404;390.8986;786.6431;316.8266;283.774;250.7215;287.0136;574.7167;862.4197;740.0848;817.9781;635.8255;857.5643;570.4252;811.7549;881.7384;1341.552;1116.947;1279.15;1067.615;1412.664;881.1515;577.0402;1112.561;1175.882;624.1188;940.9365;1179.539;832.7737;0;0;0;0;0;0	0
20140904-PurClathDigest-1ug-01	MULTI	3	312.16107	933.46138	38551.7109375	20	11	2	NaN	0.461375	-0.00801708288213376	0.926494	312.160992610977	8.147	11.17	0	663	675		-1		0				NaN	3241.5	0;1461.015;2867.952;1308.186;2176.795;1695.556;3421.189;1587.965;2559.134;2238.472;495.4376;1150.693;0	0
20140904-PurClathDigest-1ug-01	MULTI	2	313.11327	624.21199	36235.3203125	48	28	2	NaN	0.21199	-0.115147211791054	0.744983	313.113501978806	8.073	26.995	0	649	678		-1		0				NaN	4108.3	0;1279.174;874.8186;1810.647;1730.535;2938.229;2354.62;2382.843;1604.606;2386.638;2847.408;2609.269;1970.833;1552.409;3147.899;1918.373;3194.356;1739.744;2782.567;2675.855;1890.963;2445.334;1962.321;2612.049;2377.21;3424.933;2253.072;1663.758;1000.846;0	0
20140904-PurClathDigest-1ug-01	MULTI	7	313.1672	2185.1194	36487.5078125	51	31	2	NaN	0.119434	0.0742789976579843	1.473046	313.309692442131	8.423	29.8	0	672	704		-1		0				NaN	3653.4	0;349.856;971.7013;309.6569;1620.384;1167.918;1301.685;1440.703;1201.965;1351.114;1380.041;1578.931;1813.066;2199.901;666.6548;1415.596;1357.264;1232.828;1439.394;1259.392;1515.378;1264.851;1184.812;1286.75;290.9626;969.8551;616.7413;303.2168;353.0701;231.8365;548.9527;410.3736;0	0
20140904-PurClathDigest-1ug-01	MULTI	3	312.1611	933.46146	39463.7578125	48	36	2	NaN	0.461456	-0.00793665976686952	0.718786	312.161153130884	8.473	34.25	0	675	712		-1		0				NaN	3553	0;1444.435;1090.921;1661.233;2155.581;3143.589;2341.738;1539.887;1851.058;2521.115;1032.708;1515.289;1773.83;877.8528;2132.275;2497.043;842.4869;1603.664;622.8149;763.2993;1057.486;1234.611;1369.757;766.231;1160.436;1441.659;650.4822;1197.787;2173.568;1269.79;688.4026;769.5895;325.5676;415.0005;504.4334;0;0;0	0
20140904-PurClathDigest-1ug-01	MULTI	1	307.95597	306.94869	32398.431640625	10	7	2	NaN	0.948694	-0.232502248468904	5.147125	307.960348869795	8.565	7.665	0	691	699		-1		0				NaN	1599.7	0;384.3762;514.5028;1081.396;625.1853;557.282;818.1071;0;0	0
20140904-PurClathDigest-1ug-01	MULTI	7	308.8992	2155.2435	39980.22265625	26	19	2	NaN	0.243495	0.212082581982941	1.513894	308.899125145117	8.552	18.955	0	686	706		-1		0				NaN	2588.7	0;883.3816;521.1221;765.7538;653.717;1164.615;1599.222;1339.179;1250.516;1580.506;1384.707;867.2866;720.0092;737.9581;702.2448;720.1664;599.9351;478.846;448.9868;432.157;0	0
20140904-PurClathDigest-1ug-01	MULTI	2	313.61267	625.21079	NaN	9	6	2	NaN	0.210787	-0.116809861172896	4.104487	313.613830965971	8.564	6.7	0	692	699		-1		0				NaN	1025.4	0;709.3127;471.771;349.2306;713.4893;750.4255;903.5469;0	0
20140904-PurClathDigest-1ug-01	MULTI	1	305.05148	304.0442	37698.9375	16	12	2	NaN	0.044203	-0.135656979080125	0.586197	305.051466694898	8.563	12.46	0	689	702		-1		0				NaN	8711.2	0;2266.108;4820.923;2750.263;6170.97;7946.032;4666.628;6799.794;8547.97;5666.523;5011.902;5446.921;4098.246;0	0
20140904-PurClathDigest-1ug-01	MULTI	2	316.0551	630.09564	38826.42578125	73	52	2	NaN	0.095639	-0.234205216654345	0.782251	316.055526126351	8.4	49.38	0	656	709		-1		0				NaN	3226.8	0;1023.033;982.363;1137.847;1441.691;1286.442;1417.408;1169.147;778.9679;1178.907;1141.268;878.5948;768.9086;2232.122;1347.017;1500.179;1090.091;801.5858;1154.195;1591.77;1011.114;1116.974;1861.278;912.489;1129.188;1384.607;1409.395;2071.413;2365.768;2270.616;2290.526;1829.498;1970.526;926.5924;2056.354;1915.203;2670.867;2216.908;2204.96;1760.462;1386.887;1958.021;1554.582;2269.466;1681.076;1892.…	0
20140904-PurClathDigest-1ug-01	MULTI	7	313.16689	2185.1173	36487.47265625	43	27	2	NaN	0.11729	0.0721361028199681	1.493165	313.309548602016	8.029	26.045	0	647	675		-1		0				NaN	4177.7	0;565.7723;665.4716;1127.716;1979.089;1387.051;1558.667;1410.194;690.313;1343.109;1515.156;1715.003;1638.202;1270.675;1348.422;1368.242;1199.051;1521.649;1250.535;1447.819;1740.337;877.675;1916.468;671.3377;604.9023;0;0;0;0	0
20140904-PurClathDigest-1ug-01	MULTI	1	304.24791	303.24063	37813.2734375	60	44	2	NaN	0.24063	0.0611392832812498	0.608737	304.247748189436	8.461	41.625	0	668	713		-1		0				NaN	9929.1	0;3904.688;4702.926;7364.866;7340.496;7003.899;7568.184;7258.917;5145.829;5377.645;6570.124;6163.991;5445.697;7021.666;7199.705;4509.506;4640.826;5601.296;6866.189;7858.65;5614.618;5822.668;4855.654;6983.391;5261.412;7148.53;9743.141;7425.953;7564.886;8852.892;6324.112;7037.492;8022.54;6292.991;3963.98;8088.266;3398.743;5335.724;2687.877;2661.662;1957.183;2758.504;2659.333;1600.057;1530.167;0	0
20140904-PurClathDigest-1ug-01	MULTI	2	310.08779	618.16103	38430.9609375	32	22	2	NaN	0.161029	-0.163324998515691	0.628812	310.087754101927	8.563	21.58	0	684	707		-1		0				NaN	12295	0;4589.152;5065.438;6249.298;4647.764;5592.698;5106.75;6254.158;5304.126;8746.449;8294.453;6880.954;6117.064;9635.931;5511.765;9360.85;7229.935;7916.876;5166.083;6108.242;4167.174;4775.22;1686.168;0	0
20140904-PurClathDigest-1ug-01	MULTI	1	315.1475	314.14022	37138.7265625	487	298	2	NaN	0.14022	-0.044284247968676	0.30501	315.147453771594	7.184	264.565	0	463	764		-1		0				NaN	29481	0;1629.703;2082.866;3366.651;4237.93;4822.681;4670.501;4814.482;3800.249;5971.622;5240.135;5273.022;5113.876;6349.574;5746.27;5697.12;6060.55;3347.846;7234.851;4147.292;8871.677;9753.562;10431.2;5697.371;9133.658;11612.58;10074.96;11461.14;11803.94;12684.97;11639.17;13477.01;12501.38;14560.79;11556.74;12201.49;14066.77;15372.62;15664.67;15007.63;14244.64;18152.45;15624.46;14123.3;16437.63;16394.2…	0
20140904-PurClathDigest-1ug-01	MULTI	3	314.15745	939.45052	38661.18359375	69	44	2	NaN	0.450523	-0.0216238032594447	0.56785	314.157389124173	8.492	41.525	0	673	718		-1		0				NaN	4469.1	0;343.0309;1175.729;2861.489;1268.476;2073.784;2004.798;2421.263;1918.802;2533.675;1662.747;3241.474;1934;3098.658;2978.57;1586.582;1452.734;2073.895;2477.91;2717.214;2739.511;1467.822;1691.465;1649.269;1109.166;1883.882;1809.499;810.737;936.5544;1265.785;772.9731;1207.253;1197.633;1168.626;513.9803;355.7063;653.3456;301.0778;589.028;643.6841;934.284;227.4722;983.3146;301.5654;630.6688;0	0
20140904-PurClathDigest-1ug-01	MULTI	2	316.05481	630.09507	NaN	10	10	2	NaN	0.095073	-0.234770845374896	3.504838	316.055774813182	8.866	10.155	0	710	721		-1		0				NaN	1066	0;322.3417;253.7356;243.8716;418.232;1155.172;996.8564;624.909;611.5708;0;0;0	0
20140904-PurClathDigest-1ug-01	MULTI	7	308.90003	2155.2493	NaN	10	7	2	NaN	0.249293	0.217878025696336	2.727982	309.043983845934	8.981	7.395	0	718	726		-1		0				NaN	1866.5	0;246.5271;307.3374;368.1477;554.6241;714.3929;1139.598;232.1638;0	0
20140904-PurClathDigest-1ug-01	MULTI	2	316.05423	630.0939	NaN	8	6	2	NaN	0.093905	-0.235938648947922	4.199595	316.055506256995	9.065	6.54	0	725	732		-1		0				NaN	831.01	0;227.8942;246.9098;837.5259;777.0891;340.0331;275.7675;0	0
20140904-PurClathDigest-1ug-01	MULTI	1	301.13765	300.13038	33694.21875	37	28	2	NaN	0.130376	-0.047684304766392	4.352222	301.140221667158	9.028	26.82	0	711	740		-1		0				NaN	8049.4	0;1319.923;937.9353;1149.322;1268.673;1094.385;879.2462;1059.171;1284.894;2899.707;896.0312;5189.544;7308.899;5735.066;7898.595;4529.297;6605.908;6332.812;5709.722;5933.919;1209.622;1887.756;1295.464;1400.691;823.2821;1884.06;1694.301;759.3191;764.8294;0	0
20140904-PurClathDigest-1ug-01	MULTI	1	301.13286	300.12558	35088.6484375	23	17	2	NaN	0.125583	-0.0524742830544369	3.28176	301.132336443349	9.156	16.545	0	728	746		-1		0				NaN	18835	0;1199.303;9206.97;9433.135;15252.48;18482.59;17558.2;7847.764;8967.064;17682.94;8512.44;8602.674;831.1494;666.6017;0;0;0;0;0	0
20140904-PurClathDigest-1ug-01	MULTI	1	301.14021	300.13293	NaN	11	7	2	NaN	0.132934	-0.0451272241695619	0.582062	301.140126028097	9.374	7.18	0	745	753		-1		0				NaN	6710.1	0;5128.729;4248.784;5702.696;5423.824;6584.427;6182.699;489.3149;0	0
20140904-PurClathDigest-1ug-01	MULTI	1	301.13233	300.12505	34376.9609375	15	8	2	NaN	0.125052	-0.053005992867952	0.971038	301.13224668522	9.307	8.09	0	740	749		-1		0				NaN	21307	0;6030.001;7057.591;10283.56;20908.02;18400.36;10044.03;9810.506;1494.458;0	0
20140904-PurClathDigest-1ug-01	MULTI	1	301.13235	300.12507	34376.9609375	790	406	2	NaN	0.125069	-0.0529887817809254	0.395476	301.132306832211	6.413	328.98	0	320	729		-1		0				NaN	215340	0;4578.511;6629.664;5473.824;4815.496;6869.897;7522.998;12820.41;13005.78;16418.21;14678.16;15755.06;18579.75;17324.94;21963.06;23443.07;26114;26232.65;29432.42;27606.52;32748.75;27621.71;33418.67;32200.26;34260.58;29941.26;31306.03;38982.46;39076.01;37291.77;38707.07;42177.17;39814.45;43766.33;40937.55;42696.98;50032.79;46827.68;57023.25;51973.26;55935.3;58688.58;67099.67;54128.05;62641.52;72277…	0
20140904-PurClathDigest-1ug-01	MULTI	1	301.13233	300.12506	34376.9609375	60	41	2	NaN	0.125058	-0.0530000100627603	0.587001	301.132262949951	9.632	37.58	0	748	790		-1		0				NaN	25160	0;6416.08;10507.08;9808.397;14588.97;23253.09;13188.72;11453.94;18200.17;9830.615;22826.88;15448.38;7371.939;18485.88;8184.391;13224.49;8268.244;6559.434;6422.936;7758.415;6346.747;8227.32;6032.846;6788.852;6487.734;5407.79;21295.49;7371.327;6840.594;6785.464;11026.98;8139.339;12922.96;7720.472;5417.493;12370.89;7061.411;9336.211;9115.015;8124.583;4578.38;4512.726;0	0
20140904-PurClathDigest-1ug-01	MULTI	6	305.94796	1829.6441	39442.421875	59	44	2	NaN	0.644114	-0.237522717496859	0.605131	305.947903057529	9.21	41.065	0	713	758		-1		0				NaN	10947	0;1235.688;1390.59;2510.367;1812.884;2181.789;2707.904;871.712;2923.265;3676.47;1542.144;3120.305;1241.58;3286.127;480.6685;4168.759;2762.749;5047.963;4041.275;2952.046;2222.479;1451.06;3834.994;3203.142;1969.921;4591.222;3478.795;7342.808;4793.476;5992.653;4404.771;3068.711;1490.546;4249.688;4523.428;4548.61;4942.213;4899.935;4600.488;2914.588;719.2119;2851.137;3452.851;2204.619;3122.726;0	0
20140904-PurClathDigest-1ug-01	MULTI	6	305.94799	1829.6443	39442.42578125	73	57	2	NaN	0.644261	-0.2373756171487	0.796695	305.947898304995	10.011	51.855	0	752	810		-1		0				NaN	9022.8	0;445.9316;519.236;816.5802;674.6652;425.9535;592.1537;418.4544;995.7846;197.8392;483.4326;580.5785;453.3559;947.6208;481.7658;307.0849;644.3898;371.0788;928.367;308.6689;704.261;481.8455;259.43;779.8812;734.5182;512.76;452.6136;1577.032;760.1056;316.8222;713.6292;346.5889;571.2946;2108.051;2290.048;3888.087;2605.099;3655.753;1670.835;3237.874;4959.158;3793.655;6234.219;4806.567;6052.003;3599.421…	0
20140904-PurClathDigest-1ug-01	MULTI	1	301.13309	300.12581	31984.798828125	55	31	2	NaN	0.125815	-0.0522429408427456	3.077842	301.132258730179	10.208	28.695	0	790	822		-1		0				NaN	19466	0;6461.48;6175.566;6866.529;7817.028;5319.659;6740.592;7659.749;9680.178;7345.152;9902.466;5118.016;13030.52;9202.011;19101.81;8529.567;5341.649;7514.123;9596.131;18781.39;5312.576;4799.113;7735.564;9207.52;7590.113;5100.161;14409.48;7149.481;615.2113;0;0;0;0	0
20140904-PurClathDigest-1ug-01	MULTI	1	301.13225	300.12497	26937.306640625	28	19	2	NaN	0.12497	-0.0530877480163099	0.585817	301.132212729644	10.494	17.89	0	809	829		-1		0				NaN	20341	0;306.7495;747.4815;600.0943;2335.178;520.9481;168.4981;2307.794;718.1929;424.0812;4396.753;8857.009;5109.69;7148.671;16257.16;10081.59;19959.6;10966.97;19863.07;8051.507;0	0
20140904-PurClathDigest-1ug-01	MULTI	1	301.13227	300.12499	28099.759765625	19	11	2	NaN	0.124994	-0.0530632520225254	1.168133	301.132213895911	10.65	10.58	0	829	841		-1		0				NaN	22309	0;4609.547;5994.551;21686.14;21890.78;7921.276;8737.05;11833.33;8948.66;6967.589;6679.322;6783.299;0	0
20140904-PurClathDigest-1ug-01	MULTI	7	315.0348	2198.1927	37993.04296875	48	37	2	NaN	0.192681	0.14151213426203	1.673217	315.177333367862	10.506	33.755	0	807	845		-1		0				NaN	4372.2	0;1434.08;284.8604;564.1215;714.3994;864.6772;789.9381;1120.339;1172.016;1103.278;1013.227;1642.49;1678.05;1945.438;2008.343;1656.773;1843.743;2085.248;1772.789;2383.388;1343.464;1603.008;858.1023;1251.855;1847.544;1173.802;1418.06;1014.201;610.3417;601.1005;293.6353;0;0;0;0;0;0;0;0	0
20140904-PurClathDigest-1ug-01	MULTI	7	315.0351	2198.1948	37993.078125	67	45	2	NaN	0.194791	0.143621390326189	1.254973	315.035870270544	10.028	40.88	0	768	814		-1		0				NaN	5747	0;1243.604;487.8459;879.0631;617.16;1146.303;731.3104;965.7411;1119.224;722.0895;591.0414;697.886;906.9272;915.9533;2576.429;1077.049;1344.615;1474.499;1384.075;1389.586;2192.834;1472.237;1734.878;1571.839;1738.792;1514.343;1500.063;1417.156;1036.325;1885.813;2366.361;1013.919;1296.84;1683.57;1307.109;1213.816;760.8138;917.0331;1257.598;837.2726;1156.687;987.1323;1575.534;1288.864;567.6614;630.13…	0
20140904-PurClathDigest-1ug-01	MULTI	1	301.13225	300.12497	27250.69921875	33	24	2	NaN	0.124969	-0.053088604672098	0.790812	301.132197237705	10.909	21.755	0	841	866		-1		0				NaN	18776	0;5671.639;8201.458;6624.148;11204.15;9552.813;9131.446;18424.46;14596.17;8335.393;8412.413;5264.265;7505.471;7191.325;7045.333;7490.013;4506.425;8186.343;6654.766;8538.349;9265.749;6373.937;8302.052;7609.021;5663.537;0	0
20140904-PurClathDigest-1ug-01	MULTI	6	305.94777	1829.643	38598.3671875	28	20	2	NaN	0.642967	-0.23866884674112	0.630614	305.947803322465	10.345	18.785	0	803	824		-1		0				NaN	10835	0;301.9077;2774.912;5163.779;3500.474;4426.191;1923.142;5442.296;4007.97;2809.542;3335.132;7267.743;5650.809;2407.623;3659.861;4584.067;3561.063;5656.865;4387.114;3383.516;1912.118;0	0
20140904-PurClathDigest-1ug-01	MULTI	6	305.94789	1829.6437	38598.37890625	115	63	2	NaN	0.643662	-0.237973672783028	0.562569	305.947831700167	10.903	55.885	0	818	882		-1		0				NaN	11196	0;328.1428;1257.99;294.8615;639.7535;219.1666;571.1368;951.705;4347.121;1635.261;5722.903;3769.103;4496.011;6443.458;1847.65;5158.814;4033.808;2539.698;2311.479;4113.457;3785.566;7509.587;3851.391;5704.413;5326.828;3840.315;4703.833;5969.55;6282.639;4930.242;2598.803;3230.283;5825.895;3617.676;5802.693;4661.803;3206.783;4735.222;6178.659;5500.307;5888.017;5671.097;3440.826;3387.858;4352.353;4877.…	0
20140904-PurClathDigest-1ug-01	MULTI	7	308.90031	2155.2513	NaN	9	6	2	NaN	0.251264	0.219848368803014	3.259579	309.044133875578	11.39	6.025	0	883	890		-1		0				NaN	2106	0;1285.794;894.1104;893.8067;520.5956;348.5432;0;0	0
20140904-PurClathDigest-1ug-01	MULTI	1	301.13218	300.1249	35088.5703125	43	25	2	NaN	0.1249	-0.0531569689383105	0.824988	301.132143366409	11.263	22.395	0	866	892		-1		0				NaN	26458	0;5716.675;5984.468;10408.13;14729.45;20193.14;5794.454;25962.33;5317.111;8830.15;10494.27;8381.398;11191.52;12174.57;14089.07;7385.629;11667.89;16343.68;7945.734;8061.875;7580.686;4929.279;720.1816;0;0;0;0	0
20140904-PurClathDigest-1ug-01	MULTI	6	305.94797	1829.6441	38387.34765625	49	28	2	NaN	0.644142	-0.237494463183793	0.567792	305.947912657849	11.539	24.4	0	882	911		-1		0				NaN	11788	0;1152.886;7907.005;1837.575;4624.208;5081.589;5430.321;5032.183;3240.352;3833.487;4334.808;4442.175;3187.304;4320.206;5760.424;5038.177;4604.524;5790.743;3227.299;5706.596;7306.97;5964.588;4003.677;2828.54;3837.169;1815.49;4511.333;3339.646;888.8514;0	0
20140904-PurClathDigest-1ug-01	MULTI	6	305.9479	1829.6438	40020.85546875	12	7	2	NaN	0.643752	-0.23788427993486	1.117524	305.947869570764	11.803	6.65	0	911	919		-1		0				NaN	12857	0;2808.683;1873.65;5052.706;6343.073;8623.704;2786.197;2593.727;0	0
20140904-PurClathDigest-1ug-01	MULTI	1	301.1322	300.12492	35088.5703125	50	33	2	NaN	0.124924	-0.0531332525888502	0.587541	301.132171479136	11.682	28.715	0	888	922		-1		0				NaN	17732	0;4440.688;7699.999;6268.084;8898.208;9618.41;6858.52;5666.434;6561.312;9307.634;5276.238;7354.142;9064.983;7464.759;7530.049;8777.744;6426.505;11716.18;6015.455;8917.506;8111.24;13176.16;17399.45;14209.8;9966.512;14017.08;6440.206;6363.481;9900.827;11136.55;8581.203;12149.1;8028.864;5132.182;0	0
20140904-PurClathDigest-1ug-01	MULTI	2	303.18723	604.35991	38548.20703125	5	3	2	NaN	0.35991	0.0419048051325035	2.84083	303.187086806866	12.17	3.255	0	940	944		-1		0				NaN	4196	0;3957.318;882.6207;985.0372;0	0
20140904-PurClathDigest-1ug-01	MULTI	1	311.31292	310.30564	38548.95703125	8	6	2	NaN	0.305645	0.122903979696048	2.21627	311.312789364762	12.165	5.715	0	938	945		-1		0				NaN	53260	0;858.1266;840.1563;52261.91;8807.174;1222.335;521.2715;0	0
20140904-PurClathDigest-1ug-01	MULTI	7	304.01798	2121.0749	NaN	5	3	2	NaN	0.074938	0.0592432567195829	1.951967	304.160991700603	12.409	3.125	0	957	961		-1		0				NaN	2347.7	0;777.9216;784.0786;813.6081;0	0
20140904-PurClathDigest-1ug-01	MULTI	1	301.13998	300.1327	21260.98828125	175	133	2	NaN	0.132703	-0.0453577080845093	0.552573	301.139925722891	11.576	113.005	0	833	967		-1		0				NaN	15169	0;4630.486;4399.322;6003.505;4756.31;7519.573;4419.114;4575.651;5211.649;7182.879;4799.299;6413.051;4794.797;4640.18;7684.319;7476.796;7269.272;3793.262;5015.784;6621.723;8127.763;4295.134;7241.193;4873.97;5780.461;5126.625;4530.051;5041.715;5474.796;5029.919;6253.208;5828.17;5327.843;7981.002;7464.114;7907.632;6695.901;10175.75;8484.089;8693.22;8738.826;7100.43;5375.876;7318.846;6401.119;7096.35…	0
20140904-PurClathDigest-1ug-01	MULTI	6	305.94786	1829.6435	39456.90625	55	36	2	NaN	0.643519	-0.23811686816498	0.576026	305.947801247471	12.029	30.85	0	919	956		-1		0				NaN	10645	0;1020.026;4053.039;3227.848;6296.577;4575.721;3253.101;2762.128;4528.128;2156.774;5256.593;4402.939;4275.965;7140.126;2098.124;5040.922;2041.309;3010.907;3513.561;3229.603;3582.017;1514.222;1321.197;759.1715;420.4423;725.7551;732.4155;854.9343;564.3429;616.6024;1084.961;908.6165;250.6772;1495.927;824.7266;0;0;0	0
20140904-PurClathDigest-1ug-01	MULTI	6	305.94795	1829.644	39456.9140625	46	31	2	NaN	0.644029	-0.23760723404348	0.866947	305.94792492856	12.42	25.985	0	942	975		-1		0				NaN	34001	0;2204.517;2642.808;5719.963;3232.389;2910.216;2547.195;4234.115;1834.616;3153.322;6273.352;1502.226;2124.719;1116.849;2185.928;3936.266;5149.809;2884.919;4487.196;5387.975;8461.47;24316.11;22806;3109.1;4956.954;3500.423;3070.689;5024.238;5635.841;2744.764;1426.054;1082.547;0	0
20140904-PurClathDigest-1ug-01	MULTI	2	303.1877	604.36086	38628.29296875	5	3	2	NaN	0.360856	0.0428497644552408	2.790953	303.187719048917	12.603	4.46	0	972	978		-1		0				NaN	6432.7	0;7529.673;6066.761;915.6342;0	0
20140904-PurClathDigest-1ug-01	MULTI	1	311.31256	310.30528	38587.046875	17	14	2	NaN	0.305281	0.122540540007549	2.917145	311.312416541743	12.628	13.14	0	971	988		-1		0				NaN	160200	0;750.9972;54644.72;157201.3;8297.505;2601.677;1181.512;1288.837;1145.932;4043.198;35462.03;511.818;1103.26;1804.238;0;0	0
20140904-PurClathDigest-1ug-01	MULTI	1	301.14	300.13272	23647.171875	13	9	2	NaN	0.132723	-0.0453376814814419	2.013424	301.139898392531	12.656	9.28	0	971	983		-1		0				NaN	9450	0;547.3256;1036.3;592.5237;7087.101;9273.011;4940.078;6122.55;1009.98;1068.127;0	0
20140904-PurClathDigest-1ug-01	MULTI	1	309.02283	308.01556	NaN	6	5	2	NaN	0.015556	-0.166131184969913	4.461895	309.02611711439	12.748	4.75	0	983	989		-1		0				NaN	900.82	0;883.9423;593.2578;427.8355;579.5728;0;0	0
20140904-PurClathDigest-1ug-01	MULTI	1	301.13226	300.12498	33779.609375	72	40	2	NaN	0.124984	-0.0530739494631689	0.611281	301.132237896135	12.187	33.845	0	922	963		-1		0				NaN	21903	0;8593.908;8433.676;13691.49;10249.67;9648.767;8947.143;8300.474;5828.312;10596.79;8255.601;12581.26;9384.357;13920.2;8243.342;7026.528;14042.45;12599.71;16288.65;10060.4;14187.61;13207.44;11431.96;11949.58;6995.127;14192.52;9145.46;5415.774;10837.31;9046.302;10053.78;21493.03;10019.85;14522.92;9939.576;5669.878;9481.593;17723.58;6835.198;8897.8;0;0	0
20140904-PurClathDigest-1ug-01	MULTI	1	301.13232	300.12504	33779.6171875	36	27	2	NaN	0.125041	-0.0530164952301107	2.052072	301.132285432398	12.74	23.06	0	965	995		-1		0				NaN	22205	0;673.7924;1171.072;2281.949;1797.017;1312.085;1099.987;972.8817;1784.489;867.9883;1154.153;673.5935;9287.161;9935.338;15905.11;16713.86;21789.06;8923.771;8348.612;5770.235;14935.19;4990.934;8489.862;7539.14;8140.961;15014.32;5566.855;5684.674;0	0
20140904-PurClathDigest-1ug-01	MULTI	1	314.14549	313.13822	37750.953125	139	95	2	NaN	0.138215	-0.0458284336306178	0.944924	314.146212504103	11.492	82.23	0	836	932		-1		0				NaN	5377.9	0;1317.645;1427.97;1637.614;1612.503;1757.735;1382.762;2286.215;1770.422;1469.094;1174.835;1932.129;2104.946;1723.012;1527.009;1392.336;1848.892;1592.441;1255.128;1240.125;1564.1;1431.775;1828.963;1394.279;1228.262;1662.938;1451.806;1383.212;1530.887;1343.937;1297.283;2041.078;1024.81;1780.33;1757.319;1382.596;1844.052;2130.411;747.8746;2005.235;1949.287;2474.607;3475.836;3426.589;3451.264;3442.5…	0
20140904-PurClathDigest-1ug-01	MULTI	1	314.14549	313.13822	37750.953125	72	42	2	NaN	0.138216	-0.0458272006487732	1.325401	314.14633297891	12.215	35.47	0	921	964		-1		0				NaN	4132.4	0;1296.871;1553.228;1919.286;1444.758;1463.11;1170.612;1393.075;1792.338;1951.892;1516.461;1674.208;2087.415;3549.686;3902.746;3293.906;3081.789;3447.516;3718.48;2706.293;2911.438;3893.896;3193.289;3835.578;4506.127;3692.965;4539.334;3004.942;2664.669;3608.959;2784.548;4054.974;2110.091;3303.156;2499.98;4647.862;3099.8;3397.06;2688.351;2895.752;4538.046;1802.988;922.1437;0	0
20140904-PurClathDigest-1ug-01	MULTI	1	314.14653	313.13925	37751.078125	68	36	2	NaN	0.13925	-0.0447945322873125	1.218092	314.147351509529	4.185	24.72	0	353	390		-1		0				NaN	7764.8	0;2439.989;1896.07;3529.677;3622.741;4080.686;4235.147;5319.122;4455.323;5262.044;4054.414;5275.592;5596.639;4938.566;4549.847;3515.276;5160.336;5255.824;5820.775;5176.404;3858.48;4497.167;5151.825;4995.22;5903.612;5211.507;5226.692;5155.175;5957.603;5038.836;7619.368;5239.213;6088.21;3384.266;4250.355;3997.239;1881.062;0	0
20140904-PurClathDigest-1ug-01	MULTI	7	304.01745	2121.0712	NaN	4	2	2	NaN	0.0712	0.0555076565301533	1.835078	304.16059475095	12.884	2.19	0	995	998		-1		0				NaN	2441.9	0;1520.484;1114.838;0	0
20140904-PurClathDigest-1ug-01	MULTI	1	301.13257	300.12529	35992.64453125	26	16	2	NaN	0.125293	-0.0527647656388694	1.733368	301.132545325611	12.96	12.4	0	994	1011		-1		0				NaN	19854	0;2554.694;6355.623;6671.274;11994.08;5134.148;16983.85;4736.333;13228.77;18137.29;19481.91;11180.19;8505.67;7883.559;7579.174;0;0;0	0
20140904-PurClathDigest-1ug-01	MULTI	1	303.03273	302.02545	39277.87890625	28	20	2	NaN	0.025452	-0.153479280040983	4.326912	303.036063080433	13.058	15.855	0	1001	1024		-1		0				NaN	5601.9	0;1201.991;1618.773;1568.293;3692.986;2007.818;2513.113;4725.493;6489.225;4414.921;5497.003;3996.691;1247.585;1047.245;2257.73;3532.524;1371.295;2223.034;837.2076;2749.174;376.0281;0	0
20140904-PurClathDigest-1ug-01	MULTI	1	303.03295	302.02567	39594.6953125	13	9	2	NaN	0.025672	-0.153259571118156	3.326682	303.036296862155	13.58	6.16	0	1053	1063		-1		0				NaN	4909.3	0;1341.927;3076.835;4135.434;3473.381;4817.372;5763.789;2847.06;1560.773;1324.28;0	0
20140904-PurClathDigest-1ug-01	MULTI	1	315.0337	314.02642	NaN	5	3	2	NaN	0.02642	-0.158032461124947	6.30134	315.036939756538	13.635	2.44	0	1061	1065		-1		0				NaN	2208.4	0;847.4215;2167.068;1278.924;0	0
20140904-PurClathDigest-1ug-01	MULTI	1	303.03329	302.02601	35180.02734375	27	21	2	NaN	0.026011	-0.152921414698142	4.221212	303.035895529634	13.774	13.62	0	1063	1085		-1		0				NaN	6331.1	0;1445.772;1581.647;1717.521;1212.07;706.6198;1916.081;1973.84;1468.64;2748.412;1329.4;3081.481;4600.351;3944.372;6087.172;3813.107;4632.52;6212.484;3352.162;2039.765;0;0;0	0
20140904-PurClathDigest-1ug-01	MULTI	1	305.05151	304.04423	37818.1015625	18	10	2	NaN	0.044232	-0.135628232226793	0.656172	305.051475108699	8.749	10.01	0	702	713		-1		0				NaN	40880	0;5032.088;3771.87;20589.89;36722.23;29805.11;15099.42;40114.33;25713.48;14480.8;9964.352;0	0
20140904-PurClathDigest-1ug-01	MULTI	1	305.05141	304.04414	37818.08984375	252	133	2	NaN	0.044135	-0.135725136001554	0.424459	305.051373139626	10.91	116.515	0	785	919		-1		0				NaN	55984	0;731.9585;1324.17;1794.932;2602.214;1227.279;1312.852;2051.539;1349.92;3127.286;1921.259;3085.848;1468.692;1588.827;2097.165;23574.88;34711.84;21755.34;32286.27;6837.401;29318.94;38279.66;33741.29;39043.25;23336.35;47900.85;31140.78;21626.21;28672.24;51279.32;43970.49;18766.7;24126.08;44322.04;32508.19;54935.66;39769.73;31546.16;23468.08;29386.06;13965.2;31289.75;25005.65;34320.25;23783.28;27616…	0
20140904-PurClathDigest-1ug-01	MULTI	1	305.0515	304.04422	37818.1015625	87	44	2	NaN	0.04422	-0.135640344764283	0.46462	305.051469017861	9.167	41.065	0	713	758		-1		0				NaN	38468	0;17856.07;20075.37;25377.07;21781.62;20775.82;27828.12;10296.75;26071.17;28338.78;20248.43;27656.76;19906.33;28675.17;11949.26;32352.77;22222.97;31359.11;36080.12;24606.22;17926.33;16615.14;34221.03;24170.83;20743.45;30860.12;20505.73;37746.98;32472.91;33607.49;32147.21;14030.25;7146.11;23864.27;29009.22;26789.57;26785.36;31854.15;30045.92;16735.53;9474.068;19876.81;20936.67;12998.11;16913.41;0	0
20140904-PurClathDigest-1ug-01	MULTI	1	305.05147	304.0442	37818.09765625	49	26	2	NaN	0.044197	-0.135663409591245	0.614516	305.051440292742	9.712	24.2	0	758	785		-1		0				NaN	38989	0;16143;34405;12183.3;25636.2;18833.24;26250.21;15290.28;20996.79;17062.13;27054.35;34065.71;27026.6;26640.3;17413.65;28504.6;11097.02;36591.46;37730.09;21596.01;19420.7;38258.68;30890.54;14164.97;31802.67;6951.881;0;0	0
20140904-PurClathDigest-1ug-01	MULTI	1	305.05133	304.04405	37818.08203125	35	20	2	NaN	0.044051	-0.135809502829034	0.591776	305.051308415198	11.996	17.655	0	919	940		-1		0				NaN	36002	0;12671.88;22191.42;17819.83;35327.69;21949.18;21555.49;11941.51;17106.56;15175.77;24835.38;14844.85;15735.05;30547.95;11638.57;21338.29;7177.499;19477.63;16358.02;15646.28;16145.28;0	0
20140904-PurClathDigest-1ug-01	MULTI	1	305.05148	304.04421	37818.1015625	66	36	2	NaN	0.044207	-0.135652886940647	0.59834	305.051450360344	12.368	29.75	0	935	972		-1		0				NaN	34122	0;1423.857;836.9822;583.0688;1184.977;432.0084;12565.07;13045.58;18394.88;19367.13;32909.84;22224.72;22558.45;19711.15;23750.05;13909.61;20534.94;27477.17;10257.68;19220.11;11407.27;23485.28;24736.22;26969.72;16249.41;23061.55;23192.79;17267.07;33482.97;32394.61;16419.45;20305.75;17899.94;16796.69;20454.71;23270.48;15570.75;0	0
20140904-PurClathDigest-1ug-01	MULTI	1	305.05159	304.04431	37818.11328125	47	27	2	NaN	0.044313	-0.135546949913987	0.759877	305.051562790331	12.797	22.75	0	972	1002		-1		0				NaN	52710	0;14817.74;9849.698;21475.93;28965.27;19993.98;31377.88;21867.8;14737.22;14211.23;21510.84;23803.51;39507.45;18389.23;41450.51;35501.28;24214.77;22617.48;51722.75;51404.22;47389.83;18380.37;35824.74;26903.54;29841.26;35280.41;17167.05;29671.8;0	0
20140904-PurClathDigest-1ug-01	MULTI	1	305.05181	304.04454	37818.140625	17	10	2	NaN	0.044535	-0.135325217112722	0.566228	305.051781646046	13.473	6.8	0	1042	1053		-1		0				NaN	53814	0;23817;24351.66;50620.77;52806.06;51217.09;44295.1;42409.32;52496.13;43653.55;1679.076;0	0
20140904-PurClathDigest-1ug-01	MULTI	1	305.05184	304.04457	37818.14453125	60	32	2	NaN	0.044567	-0.135293221701659	0.614386	305.05181826231	13.686	20.39	0	1052	1085		-1		0				NaN	66706	0;22115.16;20085.33;48823.83;44960.75;48236.18;47301.18;65456.09;45668.62;40431.09;38304.03;53188.16;35771.14;25088.66;31128.97;38390.45;39940.8;48129.88;42335.65;38492.37;44757.8;44774.7;38805.35;30510.7;19177.08;43437.15;31469.04;42993.82;46024.78;55084.11;40715.43;24256.61;21356.61;0	0
20140904-PurClathDigest-1ug-01	MULTI	1	305.05192	304.04465	37818.15625	86	55	2	NaN	0.044646	-0.135214962314933	0.525048	305.051894004419	14.116	35.15	0	1083	1139		-1		0				NaN	57036	0;1258.86;2873.591;39577.1;43160.26;47305.17;28729.25;53953.22;34996.86;31642.53;47197.24;50215.58;37245.73;37913.54;41094.18;34807.59;42444.23;41059.4;39407.71;50505.59;44491.5;45418.24;45053.41;47635.32;38817.19;32499.57;48703.02;55967.46;47258.76;19955.57;41063.1;41690.77;43543.5;40371.25;19286.86;19220.06;35048.75;40286.8;10319.54;28046.56;46140.83;37169.19;33099.85;20694.78;32354.93;32943.56…	0
20140904-PurClathDigest-1ug-01	MULTI	1	305.05165	304.04438	37818.12109375	38	20	2	NaN	0.044376	-0.135483935690104	0.808304	305.051615436786	13.074	16.405	0	1002	1025		-1		0				NaN	65670	0;23014.26;15114.16;44504.63;35237.79;56629.67;38205.81;57162.72;41882.16;52018.5;41928.92;10879.35;34299.37;35209.45;64439.57;34800.33;45979.12;16008.03;39559.23;4997.125;0;0	0
20140904-PurClathDigest-1ug-01	MULTI	1	305.05178	304.0445	37818.13671875	35	19	2	NaN	0.0445	-0.135360830086995	0.61281	305.051743747454	13.322	13.95	0	1024	1044		-1		0				NaN	58005	0;48442.2;13061.76;35385.78;47198.28;43993.56;56918.33;47015.75;29935.43;55517.57;50314.05;48295.98;15004.75;52802.13;47735.75;39881;43092.73;39546.04;2464.385;1227.737;0	0
20140904-PurClathDigest-1ug-01	MULTI	6	305.94819	1829.6455	39253.62109375	31	17	2	NaN	0.645469	-0.236168154916413	0.688542	305.948162380549	13.077	12.89	0	1003	1021		-1		0				NaN	39159	0;1143.037;11741.01;4157.958;20778.49;14568.75;18089.79;20289.01;21050.92;21449.82;1258.735;5639.933;11009.15;26266.11;8884.884;15460.46;893.3669;8611.252;0	0
20140904-PurClathDigest-1ug-01	MULTI	6	305.94837	1829.6466	39253.64453125	84	50	2	NaN	0.646582	-0.235055853675249	0.579183	305.94835991796	13.984	31.87	0	1068	1119		-1		0				NaN	43043	0;1106.146;1601.018;1088.7;2068.029;3047.357;2280.61;1506.153;987.4432;23727.77;19641.59;20423.13;15381.77;18863.33;21787.87;12278.44;10357.79;15297.43;20469.34;20294.36;21642.55;15605.37;17406.94;19902.43;17807.6;19415.28;23503.02;14394.02;18740.86;17927.93;15195.95;18390.86;18391.46;18650.36;25167.4;19246.92;20851.04;23274.52;21608.43;22078.06;10426.76;26136.94;28870.81;19498.81;7745.597;23119.…	0
20140904-PurClathDigest-1ug-01	MULTI	6	305.94849	1829.6473	39253.66015625	39	22	2	NaN	0.647266	-0.234371661598061	0.590162	305.948461226878	14.319	14.355	0	1116	1139		-1		0				NaN	34862	0;927.4952;2490.329;963.1984;18918.87;3601.132;17244.89;19500.82;21299.84;17005.4;16978.2;20897.21;16909.69;21838.36;21076.43;16422.83;16978.68;22580.73;21298.84;23383.63;15736.02;15518.22;13813.84;0	0
20140904-PurClathDigest-1ug-01	MULTI	6	305.94829	1829.6461	39253.63671875	41	28	2	NaN	0.646069	-0.235568359757508	0.612942	305.948274562451	13.363	20.16	0	1021	1052		-1		0				NaN	83975	0;7393.769;19277.92;6116.023;12467.14;20683.03;26993.91;30424.23;24698.03;18467.63;23638.29;25196.84;16593.69;2928.328;20509.14;20110.69;19715.91;22736.74;13858.4;16480.9;10156.15;8757.393;20872.75;20732.96;23542.54;13909.04;9972.611;15739.71;24021.51;0	0
20140904-PurClathDigest-1ug-01	MULTI	1	303.0341	302.02683	38906.578125	42	28	2	NaN	0.026827	-0.152105734983252	3.946737	303.036083733359	14.593	18.245	0	1141	1170		-1		0				NaN	5188.6	0;2158.073;1927.752;1589.186;1155.504;2086.869;3372.902;2850.723;2349.258;2602.887;3338.796;2721.351;4391.639;3615.865;3661.774;2343.227;3603.448;1835.635;1539.308;3484.94;2686.478;3969.614;5091.371;3224.754;1429.557;0;0;0;0;0	0
20140904-PurClathDigest-1ug-01	MULTI	3	314.15835	939.45322	36611.359375	14	13	2	NaN	0.453222	-0.0189262921644513	2.05388	314.158240379425	14.96	8.68	0	1182	1196		-1		0				NaN	4576.4	0;664.3802;1264.073;1863.766;955.4175;1306.163;2468.801;1123.381;1186.67;2646.145;4049.112;2669.087;0;0;0	0
20140904-PurClathDigest-1ug-01	MULTI	1	303.03381	302.02653	38906.5390625	41	27	2	NaN	0.026529	-0.152403095467662	3.851317	303.036148786741	15.251	17.58	0	1205	1233		-1		0				NaN	5455.9	0;2901.591;1612.021;1728.232;3282.25;2521.783;2835.963;5023.333;3789.354;2736.232;4039.816;2304.151;4636.909;3841.225;5353.663;3772.644;4302.726;2580.694;3935.808;1030.495;2658.598;2345.146;1004.296;1759.442;2685.46;929.3345;2824.897;1132.202;0	0
20140904-PurClathDigest-1ug-01	MULTI	6	305.94834	1829.6464	39099.87890625	152	107	2	NaN	0.646385	-0.235252122686234	0.429658	305.948309841245	15.237	68.675	0	1167	1275		-1		0				NaN	80884	0;15123.61;22281.1;15801.84;14513.9;20865.19;20753.93;23068.19;12057.97;17242.2;22633.67;20629.92;23918.49;21671.86;25927.62;18401.62;23854.63;16341.22;16607.51;25195.92;18668.45;14391.14;20479.23;21331.89;22234.89;23827.05;20920.58;17586.93;16347.09;22656.73;28522.84;19767.85;20674.58;18957.29;20342.39;20167.75;21917.1;24127.7;21254.91;25070.21;14612.8;20605.12;21046.79;14438.87;25394.88;21886.7…	0
20140904-PurClathDigest-1ug-01	MULTI	1	317.05033	316.04306	NaN	4	2	2	NaN	0.043058	-0.142321716659296	8.568051	317.052927086409	15.511	1.865	0	1242	1245		-1		0				NaN	2867.9	0;2814.214;1331.209;0	0
20140904-PurClathDigest-1ug-01	MULTI	1	301.1404	300.13312	33228.40234375	18	11	2	NaN	0.133121	-0.0449402587425993	0.957262	301.140351633154	15.593	7.7	0	1245	1257		-1		0				NaN	15746	0;8496.046;10105.77;8564.501;4148.918;10876.77;7221.571;6433.802;15450.85;10527.19;5508.008;4558.127;0	0
20140904-PurClathDigest-1ug-01	MULTI	1	301.1402	300.13293	33228.37890625	26	16	2	NaN	0.132928	-0.0451332862550089	0.709892	301.140122494745	15.744	11.3	0	1257	1274		-1		0				NaN	16969	0;7081.476;11021.71;6212.64;16010.18;8637.226;12316.99;7464.393;9096.992;12112.51;4582.345;5589.556;5747.269;14242.61;5939.217;14363.08;2625.215;0	0
20140904-PurClathDigest-1ug-01	MULTI	1	301.13986	300.13258	33526.5	61	38	2	NaN	0.132583	-0.0454784036984961	0.670483	301.139765034638	16.102	33.59	0	1270	1309		-1		0				NaN	8118.4	0;1205.363;872.9473;540.5313;427.5648;5154.333;2986.313;3909.504;3708.512;4452.808;5377.588;4065.339;4053.544;4210.615;4917.484;7966.348;3412.614;3578.039;4591.994;4843.14;6312.168;4664.889;7207.475;6254.44;4179.98;5811.508;4817.049;6438.434;3262.43;2989.284;3791.262;6406.571;3593.937;3088.677;5012.449;4399.759;3292.456;5344.046;3520.564;0	0
20140904-PurClathDigest-1ug-01	MULTI	6	305.94784	1829.6434	38824.79296875	69	36	2	NaN	0.643393	-0.2382429486604	0.604138	305.947812923472	16.114	32.7	0	1274	1311		-1		0				NaN	16182	0;1025.84;5981.229;7238.235;6368.203;7596.127;3908.587;5891.619;5648.318;6437.182;8157.199;6497.249;5128.004;6614.506;8861.461;7371.104;8131.821;7162.577;8820.024;1794.844;7102.357;10184.71;6051.84;10853.91;4919.978;7070.399;3318.572;6178.733;6714.568;5989.536;5745.682;1927.661;6160.479;6931.007;6218.755;4797.393;3081.75;0	0
20140904-PurClathDigest-1ug-01	MULTI	1	310.96785	309.96058	NaN	14	10	2	NaN	0.960578	-0.222003570468246	4.344579	310.965743451287	16.33	10.01	0	1302	1313		-1		0				NaN	1085.4	0;587.7538;1000.866;772.6993;789.911;807.1227;1065.047;670.2796;223.8945;0;0;0	0
20140904-PurClathDigest-1ug-01	MULTI	1	313.97802	312.97074	36790.90625	12	9	2	NaN	0.970742	-0.213224552415852	4.077598	313.976216818919	16.485	9.005	0	1312	1322		-1		0				NaN	1758.9	0;426.5228;369.3331;954.6754;1725.995;1158.571;921.9876;702.4037;683.3392;498.3489;0	0
20140904-PurClathDigest-1ug-01	MULTI	1	309.96718	308.9599	35030.44140625	23	14	2	NaN	0.959901	-0.222220797371676	4.344716	309.969339258276	16.532	13.51	0	1313	1328		-1		0				NaN	2996.6	0;1582.158;712.603;1999.998;2208.958;1997.725;1679.106;1607.096;1462.339;1754.46;2591.556;2940.457;878.2975;914.3862;0;0	0
20140904-PurClathDigest-1ug-01	MULTI	5	303.00029	1509.9651	NaN	25	21	2	NaN	0.965067	0.230483134154838	2.622958	303.201861331946	16.559	19.69	0	1311	1333		-1		0				NaN	1887.2	0;695.4442;593.7604;492.0767;278.138;384.4246;442.0457;932.7593;609.1119;834.9882;869.3676;655.9422;1281.63;901.6821;1237.199;249.2072;841.5606;352.4694;0;0;0;0;0	0
20140904-PurClathDigest-1ug-01	MULTI	1	301.13431	300.12704	35440.62109375	30	20	2	NaN	0.127038	-0.0510201429771655	4.321398	301.131816201775	16.643	18.865	0	1317	1338		-1		0				NaN	2888.6	0;945.0636;864.3668;582.4214;2219.972;2635.928;1876.906;1488.859;1523.343;2488.383;3079.424;2834.489;1485.758;1908.643;1972.512;2036.381;1866.386;2164.976;0;0;0;0	0
20140904-PurClathDigest-1ug-01	MULTI	1	304.16221	303.15493	41138.15234375	29	22	2	NaN	0.154931	-0.0245202336636225	2.8547	304.160914538334	16.702	20.775	0	1319	1342		-1		0				NaN	1492.6	0;345.6879;385.2035;352.1188;1263.365;624.8271;734.7001;293.2336;664.6851;634.2596;1023.682;962.9807;1230.739;1367.022;1339.339;946.7495;1384.637;1119.391;1142.717;777.9847;265.6941;0;0;0	0
20140904-PurClathDigest-1ug-01	MULTI	6	305.94777	1829.6429	39560.25	72	49	2	NaN	0.642949	-0.238687052415116	0.610742	305.947736040898	16.69	45.39	0	1311	1361		-1		0				NaN	11385	0;3048.747;3417.146;7636.347;6287.044;7006.83;6651.209;6259.397;6240.246;4179.998;3691.342;2832.599;7392.008;7033.105;5502.121;3415.635;3560.63;5615.519;3689.022;5700.34;6459.932;4956.862;2013.864;2551.286;6869.958;3558.219;2933.588;3196.094;3083.833;3151.48;3964.077;2338.059;4703.934;2629.679;3475.936;3339.347;975.4235;1696.053;1465.768;3646.791;2675.419;2350.963;2657.795;2107.57;1867.799;2740.3…	0
20140904-PurClathDigest-1ug-01	MULTI	1	313.9789	312.97162	39503.44921875	44	36	2	NaN	0.971619	-0.212348062711783	3.885644	313.976028483421	16.83	33.665	0	1322	1359		-1		0				NaN	1545.5	0;371.9378;405.4811;828.2493;771.8605;715.4717;442.0102;449.6263;1308.142;495.3406;693.116;335.1832;644.9502;1478.698;1340.503;1215.176;1655.521;1128.986;900.6194;1467.903;1132.177;1344.576;1112.496;769.9725;601.9121;546.6674;449.0863;351.5052;1115.896;532.5828;588.6881;356.1197;303.1548;351.8261;0;0;0;0	0
20140904-PurClathDigest-1ug-01	MULTI	5	302.99987	1509.963	33277.43359375	5	4	2	NaN	0.962979	0.228395688175397	3.787898	302.999326201381	17	4.49	0	1349	1354		-1		0				NaN	2821	0;1365.288;1285.275;919.8687;0;0	0
20140904-PurClathDigest-1ug-01	MULTI	1	311.31256	310.30528	37161.8125	19	17	2	NaN	0.305283	0.12254291585964	1.302435	311.312395176024	17.139	16.085	0	1348	1366		-1		0				NaN	12394	0;782.5568;370.2871;545.7148;487.8842;277.2483;611.4785;1181.887;741.3752;590.0741;660.2126;730.3511;846.1456;12162.11;5962.18;3613.115;1437.891;0;0	0
20140904-PurClathDigest-1ug-01	MULTI	1	305.05192	304.04464	37912.6640625	73	48	2	NaN	0.044639	-0.135221943854617	0.563357	305.051880599197	14.56	30.595	0	1118	1167		-1		0				NaN	50205	0;1718.598;1271.697;842.7992;1522.599;1512.474;2539.936;2454.847;1542.606;2133.844;2373.971;1635.786;3041.012;1668.09;1918.839;1967.259;2403.404;3818.208;1227.228;2324.568;2006.196;1974.737;22425.97;11565.66;40721.66;43641.57;43038.2;36879.85;34586.01;29485.92;32239.82;42724.55;32140.32;39293.14;36809.14;44733.94;35243.4;43847.68;29382.98;37280.94;19527.93;22255.76;34392.46;41069.61;44160.64;3307…	0
20140904-PurClathDigest-1ug-01	MULTI	1	305.05183	304.04456	37912.65625	149	107	2	NaN	0.044557	-0.135303526438975	0.446647	305.051798313531	15.27	68.675	0	1167	1275		-1		0				NaN	58702	0;24503.06;42703.05;27338.26;23585.16;31741.8;33916.88;35910.93;17368.97;19419.11;42847.16;34903.85;32967.9;37558.88;38493.08;36435.99;33685.88;26074.39;20402.82;39770.96;30658.42;16751.29;40396.91;40431.35;36240.13;39067.84;27472.24;28602.46;29580.12;40941.67;51035.07;42677.39;30313.22;42383.93;32227.43;35564.86;47717.15;36473.36;30113.39;50976.2;24780.04;47545.36;42631.14;21849.91;38976.07;4330…	0
20140904-PurClathDigest-1ug-01	MULTI	1	305.05141	304.04413	37912.6015625	62	36	2	NaN	0.044129	-0.135730868833321	0.599262	305.051378805975	16.112	32.7	0	1274	1311		-1		0				NaN	34522	0;1286.076;17412.92;20307.26;19338.48;24743.79;11673.49;21606.07;15777.65;20276.22;19981.66;20629.4;13329.32;19789.34;29363.84;22856.99;24329.84;26179.09;26621.54;8872.122;20661.3;30901.24;20304.91;33875.07;18904.65;17735.91;13407.03;17921.07;17321.11;16389.92;19113.61;7965.701;17854.12;14420.08;15168.55;14514.55;12475.63;0	0
20140904-PurClathDigest-1ug-01	MULTI	1	305.05136	304.04408	38207.69140625	47	31	2	NaN	0.044083	-0.13577745309766	0.55413	305.051315804196	17.749	30.32	0	1384	1416		-1		0				NaN	13613	0;6915.568;8775.601;8500.998;11522.66;8743.818;5463.252;4993.653;6315.646;7105.699;9382.936;10342.11;4315.74;8764.896;8710.678;8630.092;7932.187;7722.74;7862.448;5608.54;10366.57;11613.38;6962.526;11689.71;5873.136;7091.147;6461.118;10497.5;10824.59;9064.146;2102.605;5073.69;0	0
20140904-PurClathDigest-1ug-01	MULTI	1	305.0514	304.04413	36286.125	20	11	2	NaN	0.044126	-0.135734673413367	0.597136	305.051365469302	18.095	11.51	0	1416	1428		-1		0				NaN	12384	0;6941.125;7096.646;10310.42;6879.001;12151.75;7831.035;9952.389;12110.31;8451.116;7784.701;0;0	0
20140904-PurClathDigest-1ug-01	MULTI	1	301.01656	300.00929	NaN	4	2	2	NaN	0.009288	-0.168716229837855	5.442774	301.018808927515	18.379	2.91	0	1438	1441		-1		0				NaN	763.77	0;749.4613;682.1859;0	0
20140904-PurClathDigest-1ug-01	MULTI	1	315.23082	314.22354	37753.65625	271	203	2	NaN	0.223544	0.0390012238575537	0.349376	315.230759005665	17.411	185.79	0	1263	1467		-1		0				NaN	20786	0;2106.68;2321.931;4294.476;4382.426;4147.55;3270.41;5119.616;2365.814;4906.456;3671.724;4084.171;3355.142;3248.16;4802.11;3720.64;2490.106;4837.462;3470.667;3927.375;2295.975;3046.298;3643.269;4278.106;3711.97;4034.329;4249.059;5564.903;5443.416;6426.198;5720.208;3476.91;5180.566;4625.946;5477.704;4469.035;3570.208;6309.135;3887.399;5130.663;6252.56;4699.264;4794.087;5908.634;4788.68;4822.497;50…	0
20140904-PurClathDigest-1ug-01	MULTI	1	304.24768	303.2404	41270.9296875	73	56	2	NaN	0.2404	0.060909624485646	0.603716	304.247508506551	18.555	54.655	0	1415	1472		-1		0				NaN	11537	0;1621.185;1848.216;2461.175;2265.589;2619.646;2281.528;2023.306;2252.927;2770.248;1897.56;1719.973;2143.119;1624.439;1117.158;1657.494;2265.641;2090.161;1632.235;2139.297;2464.198;2648.329;1296.741;3095.221;3640.047;3151.416;3198.944;4312.705;6080.935;6102.011;6325.818;7406.144;7577.275;6136.622;8200.36;6928.614;11320.47;11060.64;6905.732;8489.958;3497.459;5669.188;7736.245;5305.126;7441.415;101…	0
20140904-PurClathDigest-1ug-01	MULTI	1	304.24795	303.24068	42435.46875	36	28	2	NaN	0.240677	0.0611864128665047	0.69407	304.247772980293	19.07	23.685	0	1472	1501		-1		0				NaN	9333.6	0;8162.299;7981.756;7416.013;5594.415;9153.431;9158.773;8339.263;7743.366;4225.303;1402.23;4862.15;3891.936;8040.588;5900.43;4765.516;4954.488;7329.066;4156.83;8201.706;5066.271;4727.396;6863.46;5663.389;8194.82;4828.879;3753.055;3984.269;1913.691;0	0
20140904-PurClathDigest-1ug-01	MULTI	6	310.96768	1859.7624	32001.484375	10	9	2	NaN	0.762402	-0.133089015492033	1.698643	311.134589382072	19.73	7.635	0	1532	1542		-1		0				NaN	3988.2	0;915.4255;1340.362;906.2169;873.6835;1500.944;443.0168;411.4243;421.1425;0;0	0
20140904-PurClathDigest-1ug-01	MULTI	3	314.1586	939.45396	37986.57421875	11	8	2	NaN	0.453961	-0.0181877090985836	1.233467	314.158450766818	20.63	9.161	0	1608	1624		-1		0				NaN	36667	0;1252.1;1092.537;1927.676;4993.305;7533.076;20788.63;4986.265;1324.901;0	1	1617	0	0
20140904-PurClathDigest-1ug-01	MULTI	1	309.20344	308.19617	37425.23046875	824	419	2	NaN	0.196165	0.0143948145860122	0.379161	309.203380133775	6.589	345.675	0	344	766		-1		0				NaN	114350	0;4927.584;5928.901;7079.303;10190.26;11068.84;8741.242;9652.245;10758.85;9230.837;10944.81;5255.493;12470.19;10945.77;15268.65;17586.06;21090.91;17265.74;21974.01;16944.95;21202.76;25512.45;22591.22;25457.62;16928.12;20049.95;27430.7;29673.95;29121.78;25559.38;30482.14;26706.68;37695.5;35019.66;28656.57;33915.21;39790.24;37506.14;52118.38;46530.3;41606;48554.98;47801.11;56387.14;46048.22;48018.3…	0
20140904-PurClathDigest-1ug-01	MULTI	1	309.20341	308.19614	37425.2265625	29	15	2	NaN	0.196136	0.014366086497887	0.989021	309.203347494324	12.873	12.025	0	987	1003		-1		0				NaN	31438	0;1739.589;17915.59;16881.88;19224.89;30849.05;29917.66;26409.61;31427.62;22408.41;19062.2;21775.38;27802.45;23732.21;15180.39;15468.03;0	0
20140904-PurClathDigest-1ug-01	MULTI	1	309.20342	308.19614	37425.2265625	37	19	2	NaN	0.196144	0.0143737761309808	0.801991	309.203334864887	13.082	15.525	0	1003	1025		-1		0				NaN	30714	0;18647.69;26342.85;18485.08;30001.48;21706.28;30138.92;21732.86;21449.18;21275.55;21141.7;15656.53;28667.64;27336.25;13925.53;24746.39;18316.38;23899.14;17110.78;1331.365;0	0
20140904-PurClathDigest-1ug-01	MULTI	1	309.20316	308.19589	37425.1953125	331	220	2	NaN	0.195886	0.0141155904817651	0.354195	309.203097945224	11.248	189.995	0	765	988		-1		0				NaN	37208	0;14482.87;17927.77;15318.66;19287.11;16959.66;15155.54;18268.34;22022.17;20866.04;21618.65;20896.66;20375.86;19601.73;22913.12;17377.44;22145.96;22655.27;24304.9;19376.49;23294.2;21019.05;30991.75;21323.87;21192.72;23632.74;16875.13;17506.99;18391.27;24495.63;20114.95;18514.98;20006.62;21582.74;17066.25;17690.71;19399.02;21465.83;23443.12;21510.89;21249.77;15657.3;16352.61;20752.36;22026.76;1783…	0
20140904-PurClathDigest-1ug-01	MULTI	1	309.20329	308.19601	37425.2109375	238	169	2	NaN	0.19601	0.014239430987061	0.558319	309.203237038727	19.016	143.565	0	1399	1569		-1		0				NaN	25738	0;3759.162;4787.78;5994.037;5030.031;4746.501;4151.742;5050.095;4426.843;5223.559;4948.693;5165.37;4931.975;4745.423;4682.04;5372.938;4301.855;5102.723;5475.411;5451.235;3387.781;5078.242;5289.738;4474.915;6135.221;4772.027;4333.23;5902.983;4887.559;4909.43;6498.02;6741.198;5388.016;4938.149;8179.578;7109.868;7174.704;6668.826;9659.604;8281.986;9437.022;8580.697;12955.91;12500.67;12848.83;13439.3…	0
20140904-PurClathDigest-1ug-01	MULTI	1	309.20409	308.19681	37425.30859375	67	48	2	NaN	0.196814	0.0150430316795109	0.591026	309.204012754089	20.419	37.966	0	1569	1632		-1		0				NaN	18991	0;8929.491;7225.684;7975.275;10092.79;9566.323;8678.61;8982.372;8465.438;9277.294;10004.58;12798.75;10912.47;10414.51;12195.11;9178.141;8918.604;10478.65;14091.28;11805.09;16074.54;13872.69;12820.01;15666;12250.19;12871.17;13873.37;12829.24;15352.99;14201.31;15384.67;13511.24;14277.51;13060.79;14042.29;12051.62;14788.13;13528.72;14676.27;13851.94;12722.51;14860.38;12457.24;12511.18;14148.68;7796.…	0
20140904-PurClathDigest-1ug-01	MULTI	4	300.93868	1199.7256	40034.41796875	6	3	2	NaN	0.725622	0.133747834657925	4.158272	300.939302207615	20.681	7.396	0	1616	1632		-1		0				NaN	3227.9	0;2705.148;1610.109;2260.038;0	0
20140904-PurClathDigest-1ug-01	MULTI	3	307.15793	918.45195	37066.796875	4	2	2	NaN	0.451951	-0.0105371833801655	3.679692	307.158170713439	20.71	6.19	0	1618	1632		-1		0				NaN	5521.3	0;1208.122;4937.141;0	0
20140904-PurClathDigest-1ug-01	MULTI	3	314.48669	940.43825	35001.3671875	6	3	2	NaN	0.438249	-0.0343521043473629	2.841121	314.486472131883	20.689	7.396	0	1616	1632		-1		0				NaN	14313	0;8617.721;12592.21;12664.19;0	0
20140904-PurClathDigest-1ug-01	MULTI	1	317.2415	316.23423	36874.41796875	71	39	2	NaN	0.234227	0.0487596694102308	0.567857	317.241431373611	20.395	26.895	0	1572	1613		-1		0				NaN	50024	0;999.5795;2483.18;4167.507;9700.313;10450.9;5151.754;11259.96;26266.89;18017.21;23382.85;14019.87;9908.718;12451.29;32130.53;16245.98;21369.12;46698.08;32446.78;40022.84;40513.5;43242.33;49087.03;26305.52;32275.04;39579.01;33518.16;19674.97;24246.63;29039.77;27674.31;24150.18;28915.46;24677.4;21520.09;12764.79;17165.95;10562.99;0;0;0	0
20140904-PurClathDigest-1ug-01	MULTI	1	300.05782	299.05055	39922.953125	361	208	2	NaN	0.050547	-0.127016097804358	1.51226	300.060220739349	19.36	174.825	0	1410	1640		-1		0				NaN	11324	0;1878.548;2827.162;2051.545;2697.939;2934.374;1982.993;1976.829;2197.145;2559.813;3077.213;3999.636;4875.388;4719.293;3685.073;4862.513;4289.973;3576.242;4558.259;5841.535;4491.197;5048.398;4689.03;3683.14;6342.331;4512.625;5193.68;8329.141;5087.475;5046.664;6261.188;5194.136;4619.024;5092.626;4232.477;4093.229;4875.494;5784.308;5793.244;6324.659;5004.574;5063.645;5379.358;6210.688;4665.049;8274…	0
20140904-PurClathDigest-1ug-01	MULTI	3	305.51538	913.52432	37983.0078125	9	5	2	NaN	0.524317	0.0640960053793833	1.627814	305.515421050869	20.785	17.775	0	1618	1656		-1		0				NaN	85086	0;1729.025;4516.678;76083.35;11136.17;1417.737;0	0
20140904-PurClathDigest-1ug-01	MULTI	3	315.51909	943.53546	36369.3359375	29	21	4	NaN	0.535455	0.0614288693627714	2.403798	315.518731472294	20.917	42.749	0	1621	1702		1941	KDTKPEVK	8	Unmodified	_KDTKPEVK_	F1N3M8;G3MYP5	44.5624313354492	114560	0;1180.958;38999.11;56119.94;111740.1;85765.07;22772;8665.653;1688.66;1467.218;1245.777;1009.503;773.2292;972.7703;1172.311;1163.021;909.4406;883.0701;0;0;0;0;0	1	1652	0	0
20140904-PurClathDigest-1ug-01	MULTI	3	306.17851	915.51371	37169.23046875	7	5	2	NaN	0.513715	0.0525784415287944	2.619048	306.178297118021	20.916	22.785	0	1632	1678		-1		0				NaN	21974	0;7937.054;19648.54;6779.218;2331.103;0;0	0
20140904-PurClathDigest-1ug-01	MULTI	3	309.84294	926.507	37140.8046875	7	5	2	NaN	0.506999	0.0408062123153741	2.383454	309.843086215697	20.937	22.25	0	1624	1672		-1		0				NaN	14742	0;1098.405;2530.608;10427.83;13043.05;1538.51;0	0
20140904-PurClathDigest-1ug-01	MULTI	2	315.67728	629.34001	32470.72265625	14	9	2	NaN	0.340007	0.0105110204184484	2.903191	315.676747504893	21.162	19.87	0	1656	1692		-1		0				NaN	9040.2	0;2948.412;8453.608;3423.383;6300.85;5177.309;5968.226;3293.201;1434.044;692.2967;0	0
20140904-PurClathDigest-1ug-01	MULTI	1	303.15723	302.14995	NaN	4	2	2	NaN	0.149954	-0.0290346222434437	7.864032	303.153465088088	21.252	3.44	0	1686	1692		-1		0				NaN	3372.4	0;3309.259;1429.448;0	0
20140904-PurClathDigest-1ug-01	MULTI	2	306.1673	610.32005	38095.7265625	229	165	2	NaN	0.320047	-0.00070060012308204	0.512152	306.167183763359	21.933	126.155	0	1664	1870		-1		0				NaN	29077	0;2827.411;11076.66;11014.92;11500.39;24189.66;18646.29;19797.37;24467.09;24847.95;20653.88;26452.03;22516.35;22109.74;25583.42;22187.61;25327.27;21200.13;24309.37;22858.21;24229.22;20050.7;22760.93;24636.79;23562.54;25384.45;21451.55;26459.35;27422.96;23578.97;20989.49;20347.2;18225.13;21788.72;17759.8;19621.56;18455.26;18421.23;21144;21633.31;19270.04;18749.42;17015.07;16944.09;24039.63;20118.1…	2	1685;1735	0;0	0;0
20140904-PurClathDigest-1ug-01	MULTI	1	301.13553	300.12825	NaN	8	5	2	NaN	0.128254	-0.049804749450459	6.025752	301.132242955947	23.262	4.41	0	1881	1888		-1		0				NaN	3794.8	0;3723.76;2463.938;2580.495;846.5848;816.7059;0	0
20140904-PurClathDigest-1ug-01	MULTI	3	300.16037	897.45927	37915.1640625	26	19	2	NaN	0.459266	0.00643512402484703	1.667065	300.160298127875	24.215	15.6	0	1963	1988		-1		0				NaN	9585.4	0;1819.125;2591.45;1125.595;2759.937;6969.577;2878.269;5648.198;5768.846;5332.381;3270.385;5005.456;2935.487;3013.9;3859.636;610.9733;0;0;0;0;0	0
20140904-PurClathDigest-1ug-01	MULTI	1	301.1351	300.12782	NaN	9	6	2	NaN	0.127823	-0.0502355658430815	3.651101	301.13263550328	24.439	4.625	0	1990	1997		-1		0				NaN	3714.5	0;3144.024;2891.21;3138.732;3174.496;3595.232;3114.96;0	0
20140904-PurClathDigest-1ug-01	MULTI	3	300.16022	897.45882	40660.5546875	29	19	2	NaN	0.458823	0.00599153229450167	1.0055	300.160166051558	24.73	16.085	0	2009	2034		-1		0				NaN	7782.8	0;1534.827;3722.973;3772.758;3260.324;6959.31;2969.144;3408.389;2678.045;2609.665;4688.46;3683.978;4510.584;4428.14;519.61;4623.254;4504.984;3723.837;1159.897;0;0	0
20140904-PurClathDigest-1ug-01	MULTI	1	301.13523	300.12795	NaN	7	5	2	NaN	0.127949	-0.0501097429714719	4.612406	301.132877112803	25.627	4.14	0	2098	2104		-1		0				NaN	4664.2	0;3947.833;3371.504;3578.109;4152.979;0;0	0
20140904-PurClathDigest-1ug-01	MULTI	1	301.14108	300.1338	33228.4765625	48	35	2	NaN	0.133805	-0.0442566168649137	1.340073	301.140760688744	26.868	27.855	0	2193	2237		-1		0				NaN	10536	0;1252.816;1892.501;1620.025;797.62;4095.191;9940.605;7362.216;4628.199;7951.691;10338.78;4832.707;4747.414;7740.584;10365.78;9700.883;5361.625;10023.27;6021.967;6050.687;10783.68;3134.443;7449.106;2535.637;4333.051;2088.538;5062.272;8036.006;4607.685;4347.336;4533.225;7661.396;5986.318;0;0;0;0	0
20140904-PurClathDigest-1ug-01	MULTI	1	301.14128	300.13401	28145.30859375	36	23	2	NaN	0.134006	-0.0440551712972592	1.684966	301.140878649482	27.854	17.95	0	2295	2324		-1		0				NaN	14645	0;1379.95;7199.567;7320.02;7527.121;7739.829;7534.291;6037.476;8392.862;9883.816;7155.285;8735.346;7267.502;8001.514;12005.89;11320.68;7472.9;6978.82;7655.04;3576.817;6447.553;9910.089;4599.967;4367.967;0	0
20140904-PurClathDigest-1ug-01	MULTI	1	301.13755	300.13028	35222.11328125	19	13	2	NaN	0.130278	-0.0477823983803773	3.80305	301.133009825016	28.012	10.33	0	2317	2333		-1		0				NaN	7770.4	0;849.3234;3344.438;1366.955;3954.212;7624.861;4536.134;3298.9;5356.044;3940.424;3266.087;3834.894;1984.435;0;0	0
20140904-PurClathDigest-1ug-01	MULTI	1	301.14139	300.13412	29723.7265625	29	22	2	NaN	0.134115	-0.0439462371529658	1.526299	301.140988180071	28.324	17.28	0	2341	2369		-1		0				NaN	14024	0;3216.375;4320.333;2340.945;5313.899;6012.517;6045.155;5466.941;3475.481;8183.078;7121.47;11144.93;7242.208;8699.037;13761.17;9979.287;6871.125;3007.805;5010.735;8205.797;4890.065;5441.992;3336.098;0	0
20140904-PurClathDigest-1ug-01	MULTI	2	316.18268	630.35081	38768.0390625	117	83	2	NaN	0.350808	0.0208470715749627	0.606392	316.182310948584	28.089	60.805	0	2274	2372		-1		0				NaN	13169	0;926.4359;2176.992;1530.55;2596.969;2381.359;1716.07;1703.905;2094.993;3698.018;3488.895;2728.771;3173.916;2875.614;5322.77;3025.701;4527.339;6132.286;6869.896;5096.06;2182.962;4604.842;4421.196;6267.918;6866.897;2826.449;2624.567;6532.116;7662.059;3292.313;7233.098;6450.936;4862.75;7028.899;3232.281;6167.059;4873.025;4783.889;5087.945;7503.251;5925.509;7734.047;5842.306;6929.619;8008.054;5998.8…	0
20140904-PurClathDigest-1ug-01	MULTI	3	300.16055	897.45982	40162.03125	65	49	2	NaN	0.459818	0.00698600666510174	0.824366	300.160434269599	28.633	35.055	0	2364	2420		-1		0				NaN	10427	0;2386.773;1962.183;9324.187;6690.998;6143.007;6625.655;7410.156;6288.784;6289.433;5875.662;6511.57;4070.511;6493.806;6705.2;6847.624;1928.138;4496.2;2881.791;2391.282;2985.204;3889.094;3210.23;2739.435;1460.859;5136.432;3361.49;2398.068;3178.069;3388.71;1773.761;2859.269;1770.555;2773.607;2656.651;1037.911;2369.364;2235.599;3284.462;1311.272;2226.654;2441.427;3947.349;1882.897;2914.72;1168.541;3…	0
20140904-PurClathDigest-1ug-01	MULTI	1	301.13581	300.12853	NaN	9	8	2	NaN	0.128534	-0.0495255640425398	3.463865	301.133072621808	28.73	5.615	0	2390	2399		-1		0				NaN	5065.2	0;2358.92;3635.107;1552.301;4371.694;4562.384;3234.317;4287.248;0;0	0
20140904-PurClathDigest-1ug-01	MULTI	2	300.67291	599.33128	NaN	5	3	2	NaN	0.331276	0.0155833081547598	3.265645	300.67276918627	28.755	2.485	0	2395	2399		-1		0				NaN	2347.7	0;2214.161;2028.636;1463.925;0	0
20140904-PurClathDigest-1ug-01	MULTI	2	309.16717	616.31979	NaN	6	4	2	NaN	0.319789	-0.00371849666328217	1.571821	309.167058743118	29.098	3.195	0	2427	2432		-1		0				NaN	2151.1	0;774.9279;1530.247;1893.383;1200.235;0	0
20140904-PurClathDigest-1ug-01	MULTI	1	300.1589	299.15162	39800.515625	12	9	2	NaN	0.151624	-0.0259860066648798	4.146595	300.16037993185	29.112	6.375	0	2427	2437		-1		0				NaN	2890.5	0;1276.813;2380.778;2836.372;1816.257;2694.467;1013.401;753.0686;1212.407;0;0	0
20140904-PurClathDigest-1ug-01	MULTI	1	301.14117	300.1339	23436.267578125	20	14	2	NaN	0.133896	-0.0441655096001909	2.52031	301.140908450059	29.217	9.901	0	2434	2450		-1		0				NaN	10037	0;4291.521;8285.653;5971.683;7795.276;6394.215;8962.325;7947.595;6090.082;4993.807;8495.761;3285.193;3553.539;3883.934;5786.342;0	0
20140904-PurClathDigest-1ug-01	MULTI	3	314.48712	940.43952	30579.94140625	10	7	2	NaN	0.439518	-0.0330842665301816	2.963864	314.487008484019	30.177	5.39	0	2526	2535		-1		0				NaN	5763	0;736.9712;542.2862;4127.195;4609.843;4011.98;1714.27;3374.268;0	0
20140904-PurClathDigest-1ug-01	MULTI	1	300.05932	299.05204	39346.46875	69	37	2	NaN	0.052041	-0.125523361757814	3.243418	300.061424612832	30.015	26.48	0	2493	2535		-1		0				NaN	11561	0;1832.018;3275.272;1872;3594.712;7249.686;6861.779;6497.013;6129.073;8138.971;6793.935;9514.754;6306.112;7175.554;6630.372;7336.815;6770.902;6508.039;7105.703;4561.222;8957.425;8935.137;7036.413;6218.041;6024.022;11966.58;11344.45;7848.899;8511.477;8047.278;10140.29;6223.573;7999.041;3643.152;5184.323;2564.86;5426.474;3010.188;0	0
20140904-PurClathDigest-1ug-01	MULTI	1	300.05891	299.05163	39346.4140625	131	70	2	NaN	0.051634	-0.125930033594614	2.338211	300.060953033659	23.434	48.861	0	1862	1939		-1		0				NaN	12598	0;3120.094;2932.829;2396.091;4672.752;3670.538;2973.138;4529.692;6807.813;7056.631;7735.027;5008.971;6851.696;4335.326;5639.721;8385.252;7341.169;8589.436;8174.806;6233.191;6914.553;8676.843;7225.392;9850.217;7267.842;9263.01;7717.94;5927.141;8564.357;8836.928;7767.227;7047.757;12362.18;8177.046;8158.538;7171.217;7044.421;4591.226;7798.35;6940.726;7186.697;7150.649;8280.245;9370.289;8286.029;7874…	0
20140904-PurClathDigest-1ug-01	MULTI	1	300.05944	299.05217	39346.484375	104	67	2	NaN	0.052167	-0.125397472306247	2.754208	300.061219285385	27.367	49.92	0	2223	2303		-1		0				NaN	10757	0;1829.293;1963.526;3763.724;3962.895;2876.207;2698.816;1977.756;1987.722;4929.088;3668.735;4385.695;1057.061;6053.298;5623.63;5625.172;6818.997;5556.005;5063.799;5724.572;7664.741;6420.794;8003.475;5838.892;7063.933;5917.312;6874.393;8024.504;9868.177;5219.264;7199.468;6349.144;6498.521;5324.249;7627.145;7759.523;6414.565;7000.963;6266.276;8216.936;9516.666;6410.706;6095.933;7778.132;5899.182;81…	0
20140904-PurClathDigest-1ug-01	MULTI	1	300.05903	299.05176	39346.43359375	115	78	2	NaN	0.051758	-0.125806277282663	2.663272	300.061244094489	28.908	54.76	0	2362	2450		-1		0				NaN	7094.1	0;3089.018;3341.87;3156.599;4832.407;3761.647;3106.182;2708.464;2295.857;3754.856;1574.383;5709.28;2618.938;2040.473;4083.235;4315.828;4161.067;5668.002;4839.256;4783.759;3482.015;5219.461;3834.859;2251.275;4716.913;3039.895;5080.91;4333.694;3586.479;3037.791;4295.381;6570.272;7916.483;6222.359;7679.021;7614.435;6174.411;6656.349;4526.905;7357.602;8111.276;8419.111;7175.433;5989.408;8484.74;8484.…	0
20140904-PurClathDigest-1ug-01	MULTI	1	309.20471	308.19743	37467.2578125	25	14	2	NaN	0.197435	0.0156639682822401	0.736904	309.204587789567	30.144	11.31	0	2520	2543		-1		0				NaN	15821	0;4365.476;6908.372;13846.48;13926.96;11109.04;11429.03;15525.12;12190.56;14911.2;12529.69;14346.33;13104.66;8482.155;3642.972;0	0
20140904-PurClathDigest-1ug-01	MULTI	1	313.14414	312.13686	37061.01171875	466	359	2	NaN	0.136863	-0.046719973533186	0.292578	313.144047709343	23.13	280.87	0	1624	2080		-1		0				NaN	29410	0;10899.53;17223.72;10908.43;14110.56;15381.69;15097.15;13317.27;16025.62;12487.57;15005.2;15457.03;14209.52;16821.58;11776.97;13427.82;13206.79;16264.33;17196.32;17510.29;14806.54;15104.58;15599.94;21672.98;16107.89;18194.16;18486.55;15695.67;17022.55;15952.64;17180.25;17453.51;17674.57;17435.69;15317.02;20907.19;18468.81;16013.87;15861.01;17861.45;19373.87;16091.93;10529.54;14264.37;16378.56;15…	0
20140904-PurClathDigest-1ug-01	MULTI	1	314.22461	313.21733	37559.4921875	66	47	2	NaN	0.217335	0.0332549829731761	4.363619	314.21953999174	29.627	34.04	0	2456	2509		-1		0				NaN	4165.5	0;1637.591;1197.802;1981.497;3478.601;1981.626;2581.685;656.4385;1785.238;4236.464;2246.753;3183.936;5575.113;4107.387;3119.36;4580.421;4189.262;4794.343;5201.377;4849.06;4420.407;3497.87;4372.57;5103.596;4527.007;3598.69;3225.559;3079.559;1367.676;2355.55;1418.204;2014.322;2163.18;1776.05;2597.804;3013.084;1623.67;1767.807;3057.987;2295.589;1729.077;1219.08;1749.646;3525.794;1721.77;1650.917;225…	0
20140904-PurClathDigest-1ug-01	MULTI	1	304.1585	303.15122	NaN	9	7	2	NaN	0.151219	-0.0282309153678852	5.803912	304.16051186305	30.25	8.06	0	2528	2551		-1		0				NaN	65244	0;887.8608;648.0767;1078.787;544.1437;1246.389;16785.13;64022.06;0	0
20140904-PurClathDigest-1ug-01	MULTI	3	312.48299	934.42715	37473.65625	15	11	3	NaN	0.427154	-0.0426826187808729	1.981156	312.482759128503	30.361	21.045	0	2533	2623		-1		0				NaN	346780	0;13955.16;264534.8;182905.2;174862.7;80061.9;52486.11;24910.31;24260.67;23611.02;0;0;0	0
20140904-PurClathDigest-1ug-01	MULTI	3	301.14785	900.42172	37124.38671875	6	4	2	NaN	0.421716	-0.0324780155149256	0.774016	301.147839268256	30.286	9.22	0	2535	2575		-1		0				NaN	313090	0;279964.6;94378.38;61445.2;66294.02;0	0
20140904-PurClathDigest-1ug-01	MULTI	3	302.16388	903.4698	36647.14453125	11	5	4	NaN	0.469805	0.0142084218084619	2.069576	302.163891388021	30.281	10.146	0	2533	2575		-1		0				NaN	358370	0;3084.872;357076.1;252916.3;97631.12;0;0	0
20140904-PurClathDigest-1ug-01	MULTI	3	304.16863	909.48406	40869.453125	9	5	2	NaN	0.484061	0.0256982614174603	3.881026	304.168749458565	30.284	10.146	0	2533	2575		-1		0				NaN	429000	0;90951.22;308726.6;383609.7;149246.8;53225.53;0	0
20140904-PurClathDigest-1ug-01	MULTI	4	307.6705	1226.6529	39463.65234375	10	5	3	NaN	0.652895	0.0486349366628929	1.542996	307.67054860453	30.295	10.146	0	2533	2575		-1		0				NaN	688920	0;1561.693;166894.3;657225.2;99199.2;97432.53;0	0
20140904-PurClathDigest-1ug-01	MULTI	3	306.81606	917.42636	38266.90625	10	4	3	NaN	0.426356	-0.035659717270164	2.234829	306.815779086305	30.288	9.22	0	2535	2575		-1		0				NaN	335200	0;359226.3;327965.9;80661.84;97562.04;0	0
20140904-PurClathDigest-1ug-01	MULTI	3	305.81201	914.4142	41719.3515625	5	3	2	NaN	0.414202	-0.0464285098693153	2.896841	305.811735959009	30.319	7.415	0	2543	2575		-1		0				NaN	197670	0;48803.69;176758.8;30919.94;0	0
20140904-PurClathDigest-1ug-01	MULTI	2	309.16168	616.30881	37130.140625	15	7	3	NaN	0.308811	-0.014690666737124	1.591563	309.161528303544	30.324	13.716	0	2533	2591		-1		0				NaN	1587400	0;16234.42;66312.16;506692.1;1573781;472533;189429.1;30862.62;0	0
20140904-PurClathDigest-1ug-01	MULTI	4	310.66693	1238.6386	37922.46484375	9	5	2	NaN	0.638603	0.0288289233531032	1.771141	310.667018876544	30.305	11	0	2535	2583		-1		0				NaN	1180500	0;79246.27;974508.6;308237.7;167816.3;39793.17;0	0
20140904-PurClathDigest-1ug-01	MULTI	3	310.811	929.41118	38128.1875	9	5	2	NaN	0.411183	-0.0563463261109973	2.338433	310.811045999918	30.282	10.146	0	2533	2575		-1		0				NaN	613800	0;6099.204;543077.4;464608.4;152746.1;18757.3;0	0
20140904-PurClathDigest-1ug-01	MULTI	2	315.68491	629.35526	36571.9921875	11	5	3	NaN	0.355259	0.0257555040996067	3.023901	315.6845639135	30.291	11	0	2535	2583		-1		0				NaN	1454600	0;1093859;1439301;526782.9;178453.3;33176.43;0	0
20140904-PurClathDigest-1ug-01	MULTI	4	317.40405	1265.5871	37485.96484375	9	4	3	NaN	0.587103	-0.0350672824645244	3.155883	317.404146845236	30.253	8.375	0	2533	2567		-1		0				NaN	386380	0;318962.6;163232.4;139255.1;44054.99;0	0
20140904-PurClathDigest-1ug-01	MULTI	2	311.6931	621.37165	37574.9765625	36	21	4	NaN	0.371647	0.0458160217515342	0.799796	311.693019309362	30.359	40.22	0	2535	2711		-1		0				NaN	8466200	0;14089.65;1782576;8457093;3153286;1742434;1369316;649677.4;324661.9;239458.1;152491;117359.3;88535.27;94486.48;78627.31;62768.14;63564.11;51924.2;40284.29;57183.6;0;0;0	0
20140904-PurClathDigest-1ug-01	MULTI	1	314.2003	313.19302	NaN	8	5	2	NaN	0.193021	0.00895190955242242	3.75331	314.2007847258	30.351	10.65	0	2551	2599		-1		0				NaN	212270	0;208297.8;204141.5;74998.27;46067.71;28607.53;0	0
20140904-PurClathDigest-1ug-01	MULTI	3	305.50935	913.50623	38346.84765625	7	4	2	NaN	0.506228	0.0460147633034467	2.011038	305.509299716426	30.349	8.865	0	2551	2591		-1		0				NaN	356350	0;212185.3;318643.5;130911.2;20090.56;0	0
20140904-PurClathDigest-1ug-01	MULTI	3	309.21136	924.61225	37036.32421875	5	3	2	NaN	0.612255	0.146932958837624	0.829215	309.211351520732	30.359	7.085	0	2559	2591		-1		0				NaN	615890	0;550727;105646.3;61545.88;0	0
20140904-PurClathDigest-1ug-01	MULTI	4	312.66404	1246.627	37500.02734375	11	6	2	NaN	0.627037	0.0135886411812862	1.097234	312.663870918695	30.316	12.79	0	2535	2591		-1		0				NaN	1130500	0;20545.92;933255.4;374405.4;118384;93531.54;116855.9;0	0
20140904-PurClathDigest-1ug-01	MULTI	2	304.20004	606.38552	39045.3984375	6	5	2	NaN	0.385522	0.0665850558157217	1.31535	304.19999238726	30.402	10.785	0	2567	2615		-1		0				NaN	287490	0;283905.1;271135.8;74479.66;45838.64;0;0	0
20140904-PurClathDigest-1ug-01	MULTI	3	306.15951	915.4567	38435.37109375	20	11	3	NaN	0.456703	-0.00440703700053291	1.17469	306.159497518805	30.383	21.655	0	2551	2647		-1		0				NaN	3624600	0;426504.1;3546425;1202294;803544;246420.7;131136.5;127969.4;129740.2;203707.3;135673.4;52336.17;0	0
20140904-PurClathDigest-1ug-01	MULTI	3	311.48744	931.4405	37793.55859375	10	6	2	NaN	0.440497	-0.0279656611178325	0.602624	311.487399453457	30.329	12.77	0	2543	2599		-1		0				NaN	1760600	0;330109.3;1557732;472268.4;217503.1;20304.48;40816.49;0	0
20140904-PurClathDigest-1ug-01	MULTI	3	305.52233	913.54516	36473.1796875	20	7	4	NaN	0.545164	0.0849327603345955	0.607564	305.52230527427	30.447	14.545	0	2575	2639		-1		0				NaN	5718600	0;2044114;5697912;1729431;826006.5;210194;117242.8;83369.3;0	0
20140904-PurClathDigest-1ug-01	MULTI	3	301.48757	901.44088	38619.0859375	17	7	3	NaN	0.440882	-0.0137803935748479	0.819798	301.487595337823	30.423	14.48	0	2567	2631		-1		0				NaN	4989100	0;1212811;4881456;1933884;887479.2;402595.3;101766.2;24454.59;0	0
20140904-PurClathDigest-1ug-01	MULTI	3	308.1824	921.52537	37804.2421875	13	8	2	NaN	0.525368	0.0614663698039521	2.338448	308.182208951873	30.474	16.315	0	2567	2639		-1		0				NaN	560150	0;74487.38;337278.4;298409.8;93107.63;132038.4;187787.1;89189.95;137026.7;0	0
20140904-PurClathDigest-1ug-01	MULTI	2	301.17448	600.3344	36128.1796875	8	6	2	NaN	0.334399	0.0182449311474784	1.241348	301.174551473641	30.477	12.71	0	2575	2631		-1		0				NaN	500940	0;29956.83;241673.1;472442.3;341887.4;92427.69;19363.86;0	0
20140904-PurClathDigest-1ug-01	MULTI	1	312.18313	311.17585	40407.18359375	5	4	2	NaN	0.175851	-0.00729001213778702	8.155516	312.179257995843	30.526	9.19	0	2599	2639		-1		0				NaN	60227	0;59098.66;55953.59;22973.59;0;0	0
20140904-PurClathDigest-1ug-01	MULTI	1	301.15101	300.14374	37052.265625	5	3	2	NaN	0.143738	-0.0343277652110601	5.479738	301.148499544424	30.557	7.41	0	2607	2639		-1		0				NaN	99644	0;54081.28;97777.62;31353.75;0	0
20140904-PurClathDigest-1ug-01	MULTI	2	318.19181	634.36906	36494.43359375	7	4	2	NaN	0.369061	0.0372515530349347	1.920041	318.191719765451	30.534	9.19	0	2599	2639		-1		0				NaN	422760	0;182180.1;395326.7;190168.7;35033.41;0	0
20140904-PurClathDigest-1ug-01	MULTI	2	304.65555	607.29656	36584.70703125	4	2	2	NaN	0.296557	-0.0227997254974071	2.917656	304.655194356185	30.582	5.53	0	2615	2639		-1		0				NaN	246090	0;119056.5;232090.8;0	0
20140904-PurClathDigest-1ug-01	MULTI	3	302.83961	905.49701	37664.76171875	69	30	4	NaN	0.497013	0.0404842846972997	0.608835	302.839638010876	30.492	58.64	0	2575	2823		3118	NKPGVYTK	8	Unmodified	_NKPGVYTK_	CON__P07477;E1BQ07;G3N0B7;P00760;CON__P00761;E1BFR6;G3MXS2	60.6506614685059	68189000	0;5224841;6.688553E+07;6.794262E+07;3.874256E+07;2.2347E+07;1.125645E+07;6595984;3797882;1686814;1144143;640790.2;399808;545104.1;445472;510676.2;381080.6;150935;289770.9;66100.48;139826;73733.76;89282.14;199846.9;101365.5;185777.2;120917.1;95602.44;47309.51;61363.65;100054.6;0	1	2590	0	0
20140904-PurClathDigest-1ug-01	MULTI	3	304.17514	909.5036	38251.83203125	29	16	4	NaN	0.503603	0.0452314863673564	0.594541	304.175149595625	30.556	31.155	0	2583	2719		-1		0				NaN	8811600	0;113627.5;218775.3;933607;8779664;6775803;2219887;1155987;401524.1;116024.9;36249.41;43434.55;31607.15;39921.83;39641.85;20789.47;0;0	0
20140904-PurClathDigest-1ug-01	MULTI	3	316.83129	947.47203	40497.98828125	7	4	2	NaN	0.472031	-0.00380602323355106	1.967068	316.831391641274	30.572	9.225	0	2607	2647		-1		0				NaN	622600	0;64402.8;550862.7;145915.2;111608.7;0	0
20140904-PurClathDigest-1ug-01	MULTI	3	302.48397	904.43007	37213.92578125	9	5	2	NaN	0.430067	-0.0259708955263704	1.375593	302.48380105618	30.57	11.015	0	2607	2655		-1		0				NaN	1139000	0;422882.9;1018503;652222.4;127233.6;46374.46;0	0
20140904-PurClathDigest-1ug-01	MULTI	3	307.15073	918.43037	38613.6953125	13	7	2	NaN	0.43037	-0.0321076074233133	2.371194	307.150306829462	30.532	14.58	0	2583	2647		-1		0				NaN	619000	0;214706.5;282245.2;247689.9;196259.4;553502.1;263188.4;105313.6;0	0
20140904-PurClathDigest-1ug-01	MULTI	3	308.4873	922.44009	37991.35546875	12	5	3	NaN	0.440085	-0.0242372962118225	0.656897	308.487269907005	30.568	11.015	0	2607	2655		-1		0				NaN	1426300	0;526069.8;1395572;488195.3;250350;34490.65;0	0
20140904-PurClathDigest-1ug-01	MULTI	3	312.50316	934.48764	36784.47265625	64	26	5	NaN	0.487639	0.0177746823480902	0.607432	312.503125072783	30.603	50.135	0	2559	2775		4293	TPHTPGTPK	9	Unmodified	_TPHTPGTPK_	F1MEW3	131.497100830078	23798000	0;46207.97;97034.82;539744.3;1011497;1430737;2989530;5916041;9948253;1.942514E+07;2.378221E+07;7257149;3972614;1354558;554912.2;381625.5;194400.6;133965.2;156780.1;262011.2;132702.4;143668.3;35828.7;41220.22;34454.16;40042.15;75721.6;0	1	2612	0	0
20140904-PurClathDigest-1ug-01	MULTI	3	306.49962	916.47702	38310.5859375	14	7	3	NaN	0.477017	0.015437560288774	1.33255	306.499589234831	30.602	14.63	0	2599	2663		-1		0				NaN	820780	0;52315.22;128424.1;318621.8;499853.1;803070.4;168252.6;55888.17;0	0
20140904-PurClathDigest-1ug-01	MULTI	4	311.6599	1242.6105	37354.54296875	23	8	4	NaN	0.61049	-0.00111072912704913	0.844962	311.659891418367	30.676	16.42	0	2631	2703		-1		0				NaN	5682100	0;1499182;4230393;5625474;1646712;143075.7;502990.2;120940.7;19735.14;0	1	2659	0	0
20140904-PurClathDigest-1ug-01	MULTI	2	309.66452	617.31448	38398.9609375	6	4	2	NaN	0.314484	-0.00948102744700918	2.92611	309.664246209622	30.668	9.105	0	2631	2671		-1		0				NaN	315750	0;50243.77;297785.8;188480.1;93082.09;0	0
20140904-PurClathDigest-1ug-01	MULTI	4	307.40294	1225.5826	38434.4140625	7	5	2	NaN	0.582647	-0.0211209520525699	1.554959	307.402876508519	30.683	10.92	0	2639	2687		-1		0				NaN	473290	0;205194.2;390708;130374;51130.13;0;0	0
20140904-PurClathDigest-1ug-01	MULTI	2	315.68368	629.35281	36744.5703125	38	16	3	NaN	0.352807	0.0233042685571263	1.658601	315.684054876519	30.61	31.155	0	2583	2719		-1		0				NaN	599100	0;301239.7;249705.5;404267.1;592805.9;565121.9;490770.1;364775.1;302647.5;206244.2;322572.6;178882;164393.8;150823.5;81314.48;83213.07;32470.27;0	0
20140904-PurClathDigest-1ug-01	MULTI	2	313.18717	624.35978	37646.53515625	8	7	2	NaN	0.359783	0.0325777499607511	1.50018	313.187146818909	30.755	14.64	0	2647	2711		-1		0				NaN	280210	0;66076.97;104941.6;264264.8;193740.3;89589.52;61413.17;0;0	0
20140904-PurClathDigest-1ug-01	MULTI	2	301.1691	600.32365	39372.92578125	12	9	2	NaN	0.32365	0.00750091695294941	2.885668	301.168775258891	30.771	18.505	0	2647	2727		-1		0				NaN	383670	0;141878.9;111620.7;214457.1;361846.4;231888.1;146286.3;15361.59;16738.37;0;0	0
20140904-PurClathDigest-1ug-01	MULTI	2	307.18599	612.35743	40474.78515625	12	8	2	NaN	0.357429	0.0357441011091169	3.682648	307.186973630986	30.809	16.715	0	2655	2727		-1		0				NaN	743970	0;281258.7;466174.6;505175.3;433853.3;701646.8;571856.4;68398.94;55031.32;0	0
20140904-PurClathDigest-1ug-01	MULTI	3	312.19907	933.57538	NaN	9	5	2	NaN	0.575382	0.105937607228725	3.611895	312.199157145598	30.751	10.98	0	2655	2703		-1		0				NaN	168760	0;149311;133044.8;82847;58277.8;19135.5;0	0
20140904-PurClathDigest-1ug-01	MULTI	3	302.495	904.46317	38431.75390625	12	6	2	NaN	0.463171	0.00711778079630676	0.895792	302.494918692034	30.807	12.95	0	2663	2719		-1		0				NaN	995380	0;122748;890060.3;642458.5;528787.5;207974.5;126222.2;0	0
20140904-PurClathDigest-1ug-01	MULTI	3	312.16036	933.45926	33769.76953125	7	5	2	NaN	0.459255	-0.0101360142402882	3.48366	312.160574367424	30.872	11.225	0	2679	2727		-1		0				NaN	580850	0;34885.65;103346.5;513919.3;439302.3;0;0	0
20140904-PurClathDigest-1ug-01	MULTI	2	317.15338	632.29221	37626.89453125	9	6	2	NaN	0.292207	-0.0386471161497184	1.434652	317.153385364343	30.888	13.145	0	2687	2743		-1		0				NaN	328540	0;92318.72;307219.3;227812.3;37480.69;21017.96;62878.3;0	0
20140904-PurClathDigest-1ug-01	MULTI	1	303.1632	302.15593	40149.41796875	4	2	2	NaN	0.155926	-0.0230655830313253	8.369706	303.16753367953	30.913	5.735	0	2703	2727		-1		0				NaN	63798	0;62603.38;55915.97;0	0
20140904-PurClathDigest-1ug-01	MULTI	2	304.65576	607.29696	38199.1953125	49	19	4	NaN	0.296963	-0.0223937060418393	0.640056	304.655717259835	30.917	38.655	0	2663	2823		-1		0				NaN	16586000	0;26825.31;317316.4;2327579;7787169;1.363064E+07;1.563507E+07;1.656774E+07;1.160938E+07;6109250;1939978;913236.3;330981.4;320364.6;224377.6;242096.3;151409.2;146610.3;83682.92;82898.09;0	1	2698	0	0
20140904-PurClathDigest-1ug-01	MULTI	3	304.49114	910.45161	37630.2421875	9	5	2	NaN	0.451605	-0.00720235761230015	0.867188	304.491170086682	30.914	11.315	0	2695	2743		-1		0				NaN	2112100	0;373277.5;1888623;1240787;375089.7;103343;0	0
20140904-PurClathDigest-1ug-01	MULTI	2	312.16588	622.31722	32621.59375	6	4	2	NaN	0.317217	-0.00904918062724391	3.76933	312.165557149487	30.929	9.44	0	2695	2735		-1		0				NaN	346340	0;55715.45;86807.23;326640;104298.5;0	0
20140904-PurClathDigest-1ug-01	MULTI	2	314.72898	627.4434	40097.6875	8	5	2	NaN	0.443405	0.114780851059891	1.88275	314.728802118552	30.966	11.445	0	2703	2751		-1		0				NaN	446300	0;18101.86;181428.2;417336.6;229959.1;61417.57;0	0
20140904-PurClathDigest-1ug-01	MULTI	3	303.17719	906.50975	38150.0859375	7	5	2	NaN	0.509755	0.0527603784702251	1.828574	303.177297980881	31.014	11.695	0	2719	2767		-1		0				NaN	592180	0;244361.6;529521.3;446247.1;357404.3;55936.38;0	0
20140904-PurClathDigest-1ug-01	MULTI	2	301.66638	601.3182	44024.796875	9	6	2	NaN	0.318201	0.00159415405607888	1.550217	301.666315272503	31.096	13.99	0	2735	2791		-1		0				NaN	566590	0;107840.4;283740.2;534356.3;345072.7;82138.34;26365.55;0	0
20140904-PurClathDigest-1ug-01	MULTI	3	301.81905	902.43532	37767.9140625	64	27	5	NaN	0.435317	-0.0198031277974451	0.613839	301.81909414332	31.027	53.665	0	2711	2935		4948	WREEQR	6	Unmodified	_WREEQR_	F1MX40;G3N252;P04975	77.9546966552734	83704000	0;1864201;3.196989E+07;8.366023E+07;6.299923E+07;5.327111E+07;1.197354E+07;5666607;1865510;936275.3;1052610;674079;458559.7;395035.6;334158.8;221248.3;142884;59625.15;191430.1;107655;237262.2;201352.8;157119.4;61052.93;399693.7;221568.9;85664.04;50619.07;0	1	2728	0	0
20140904-PurClathDigest-1ug-01	MULTI	3	305.51025	913.50891	37915.98046875	7	4	2	NaN	0.508914	0.0487000254526038	2.807486	305.509953506781	31.154	10.305	0	2759	2799		-1		0				NaN	268950	0;224145.6;240492;74060.72;36888.44;0	0
20140904-PurClathDigest-1ug-01	MULTI	2	308.15874	614.30293	38175.7265625	7	4	2	NaN	0.302931	-0.0196482807583607	0.657803	308.158764373811	31.207	10.275	0	2767	2807		-1		0				NaN	291620	0;115318.2;235781.6;162101.9;55323.86;0	0
20140904-PurClathDigest-1ug-01	MULTI	3	311.50608	931.49642	37240	14	7	3	NaN	0.496419	0.0279306116589169	1.010876	311.506113782795	31.166	16.225	0	2751	2815		-1		0				NaN	1144600	0;57521.73;510424.8;1116462;556615;166852.3;33110.79;31453.15;0	0
20140904-PurClathDigest-1ug-01	MULTI	2	317.16381	632.31308	38410.640625	13	6	3	NaN	0.313077	-0.0177870674826863	1.11043	317.163665711244	31.215	14.195	0	2759	2815		-1		0				NaN	1199700	0;28008.11;431320.2;999200.5;1187111;447502.3;125305.1;0	0
20140904-PurClathDigest-1ug-01	MULTI	1	302.1768	301.16953	42175.484375	4	2	2	NaN	0.169528	-0.0090101061203427	7.645692	302.180207719545	31.245	6.31	0	2783	2807		-1		0				NaN	77078	0;75634.12;59452.73;0	0
20140904-PurClathDigest-1ug-01	MULTI	3	310.19911	927.57551	35531.62109375	5	4	2	NaN	0.575513	0.108828060242104	3.249991	310.199175678656	31.23	10.275	0	2767	2807		-1		0				NaN	153720	0;16729.71;58057.98;136008.9;23280.89;0	0
20140904-PurClathDigest-1ug-01	MULTI	3	310.81556	929.42484	37612.7578125	20	8	4	NaN	0.424838	-0.042697651665776	0.742239	310.815562043431	31.338	17.125	0	2791	2863		-1		0				NaN	2719300	0;146492.5;1511778;2707510;1378545;741080.1;200291.6;93250.06;77906.09;0	0
20140904-PurClathDigest-1ug-01	MULTI	2	307.70856	613.40256	37825.7421875	18	9	3	NaN	0.402561	0.0803961237163549	0.895531	307.708429910081	31.363	18.68	0	2799	2879		-1		0				NaN	4294000	0;209398.6;3648313;4256990;1410004;731670;340545.3;182311;137855.3;156476.9;0	1	2830	0	0
20140904-PurClathDigest-1ug-01	MULTI	3	303.16781	906.48159	35705.6875	14	9	2	NaN	0.481592	0.0246103601107279	1.911535	303.167842452529	31.357	18.995	0	2791	2871		-1		0				NaN	579950	0;26669.92;278511.9;518582.9;425167.5;80474.55;186642.5;55465.23;51355.24;58824.28;0	0
20140904-PurClathDigest-1ug-01	MULTI	3	305.51856	913.53385	40888.05078125	10	5	3	NaN	0.533848	0.0736224537010912	1.828087	305.51860852848	31.411	11.05	0	2815	2863		-1		0				NaN	351920	0;54743.8;299099.3;344325.8;164226.4;30958.25;0	0
20140904-PurClathDigest-1ug-01	MULTI	3	305.8277	914.46129	37448.81640625	15	7	3	NaN	0.461285	0.000633254628382929	0.818068	305.827734222602	31.508	14.9	0	2831	2895		-1		0				NaN	3508400	0;124019.4;601332.8;1676691;3432673;1306003;362051;111151.3;0	0
20140904-PurClathDigest-1ug-01	MULTI	3	301.49967	901.47718	38110.640625	18	8	3	NaN	0.477176	0.0224961974520284	1.395615	301.499587444816	31.515	16.71	0	2823	2895		-1		0				NaN	1856300	0;33480.19;153191.1;431231.9;757375.8;1816202;1547810;395790.2;164598.8;0	0
20140904-PurClathDigest-1ug-01	MULTI	3	307.50318	919.48772	39430.36328125	8	5	2	NaN	0.487722	0.0247574828791812	2.596484	307.5031226541	31.512	11.17	0	2839	2887		-1		0				NaN	417680	0;88274.8;130233.5;373489.3;242581;66363.77;0	0
20140904-PurClathDigest-1ug-01	MULTI	4	301.17811	1200.6833	37438.40234375	22	15	3	NaN	0.683348	0.0910336456588539	0.936019	301.17829430318	31.533	30.6	0	2775	2903		-1		0				NaN	2732800	0;12352.07;38535.59;26067.57;48528.43;41916.3;90315.75;138715.2;156600.1;110395.9;615223;2620695;1347929;862686.5;667752.4;0;0	0
20140904-PurClathDigest-1ug-01	MULTI	3	309.16631	924.47709	36282.9453125	7	5	2	NaN	0.477091	0.0118318478174615	1.704894	309.166123193872	31.602	11.15	0	2863	2911		-1		0				NaN	536310	0;91488.73;367998.5;479563.1;152440.4;175615.4;0	0
20140904-PurClathDigest-1ug-01	MULTI	3	309.81953	926.43677	37316.9296875	7	5	2	NaN	0.436769	-0.0293914727468518	3.330519	309.819045070424	31.591	11.235	0	2855	2903		-1		0				NaN	267810	0;43369.57;32821.86;158993;236955.4;99686.12;0	0
20140904-PurClathDigest-1ug-01	MULTI	2	317.23674	632.45893	NaN	6	2	3	NaN	0.45893	0.127999319838068	3.196956	317.238660169553	31.598	5.63	0	2871	2895		-1		0				NaN	374210	0;122707.3;370279;0	0
20140904-PurClathDigest-1ug-01	MULTI	2	307.68474	613.35492	38683.28125	28	10	4	NaN	0.354923	0.0327793963167551	0.608679	307.68472173757	31.598	20.65	0	2855	2943		-1		0				NaN	20899000	0;499507.1;5598546;2.087615E+07;2.080611E+07;8253712;2846760;937156.6;257611.4;252316.8;192459.6;0	0
20140904-PurClathDigest-1ug-01	MULTI	3	315.16999	942.48815	39013.4609375	9	5	2	NaN	0.488146	0.0146015188310002	1.558317	315.169977472833	31.596	11.15	0	2863	2911		-1		0				NaN	794280	0;233377.3;746654.1;702753.8;390856.5;81114.58;0	0
20140904-PurClathDigest-1ug-01	MULTI	2	317.10601	632.19748	38279.6328125	5	3	2	NaN	0.197475	-0.133335637886262	4.225022	317.107257764771	31.609	7.5	0	2871	2903		-1		0				NaN	222600	0;46100.42;208152;93812.81;0	0
20140904-PurClathDigest-1ug-01	MULTI	1	317.44577	316.4385	40241.87890625	4	2	2	NaN	0.438498	0.252936191315939	7.062478	317.448682139901	31.613	5.63	0	2879	2903		-1		0				NaN	206900	0;203026.1;76025.73;0	0
20140904-PurClathDigest-1ug-01	MULTI	2	318.07648	634.1384	37984.88671875	5	3	2	NaN	0.138399	-0.193304847429772	4.372755	318.077549939199	31.609	7.5	0	2871	2903		-1		0				NaN	532330	0;85932.74;497790.6;176849.9;0	0
20140904-PurClathDigest-1ug-01	MULTI	3	318.49926	952.47596	38449.96484375	5	3	2	NaN	0.475959	-0.00218041835330496	3.704052	318.498760802786	31.61	7.5	0	2871	2903		-1		0				NaN	398360	0;66360.69;352456.6;158039.7;0	0
20140904-PurClathDigest-1ug-01	MULTI	3	300.82408	899.4504	38524.8359375	17	9	3	NaN	0.450404	-0.00334304770763083	0.716816	300.824007870561	31.65	18.87	0	2871	2951		-1		0				NaN	5634200	0;423239.9;2295485;5512678;4252850;1398281;467097.7;69659.5;83094.91;146784.3;0	0
20140904-PurClathDigest-1ug-01	MULTI	3	306.82763	917.46105	37757.37890625	47	23	5	NaN	0.46105	-0.000981829658144306	0.451622	306.827604147223	31.661	45.02	0	2863	3055		2163	KQEAEWK	7	Unmodified	_KQEAEWK_	P04973	96.1667404174805	50853000	0;33723.72;2706930;1.938212E+07;5.082668E+07;3.886755E+07;1.876645E+07;6380011;2192604;1581684;847570.3;220260.2;121775.3;183826.7;155751.1;59852.31;171399.3;130081.4;148459.6;119309.2;80727.16;107120.7;95437.92;90124.23;0	1	2896	0	0
20140904-PurClathDigest-1ug-01	MULTI	3	309.18346	924.52855	38563.7890625	10	6	2	NaN	0.528552	0.0632685316602419	2.39657	309.183343504934	31.713	13.185	0	2887	2943		-1		0				NaN	425910	0;141337.6;351074.4;380843.6;315175.4;141513.3;190590;0	0
20140904-PurClathDigest-1ug-01	MULTI	2	301.16894	600.32332	37803.23828125	36	13	4	NaN	0.323321	0.00717210098594023	0.634797	301.168872807265	31.752	26.57	0	2887	2999		-1		0				NaN	31376000	0;852063.8;6976990;2.235797E+07;3.145397E+07;3.134267E+07;2.331839E+07;1.197483E+07;2239044;1019539;430315.5;466985.5;231286.1;76587.56;0	1	2912	0	0
20140904-PurClathDigest-1ug-01	MULTI	3	317.89387	950.65979	NaN	4	2	2	NaN	0.659792	0.18248865330429	4.224272	317.895199540843	31.81	5.84	0	2927	2951		-1		0				NaN	251540	0;192305.4;222553.2;0	0
20140904-PurClathDigest-1ug-01	MULTI	3	310.8154	929.42437	36626.6328125	15	9	2	NaN	0.424373	-0.0431619341702572	1.146562	310.815342915243	31.762	18.97	0	2895	2975		-1		0				NaN	984560	0;236244.8;442870.8;871112.3;770419.9;713082.1;519708;215835.1;68337.95;0;0	0
20140904-PurClathDigest-1ug-01	MULTI	2	317.67052	633.32649	40013.5390625	12	9	2	NaN	0.326488	-0.00484181428305419	0.942149	317.670472683749	31.888	19.075	0	2927	3007		-1		0				NaN	832800	0;137783;576083.3;463372.8;316211.4;251561.4;141553.3;266737.3;57592.04;67922.2;0	0
20140904-PurClathDigest-1ug-01	MULTI	2	307.70852	613.40248	37572.625	15	10	2	NaN	0.402483	0.0803178440227157	0.781683	307.708451277212	31.971	20.62	0	2943	3031		-1		0				NaN	1122600	0;54509.85;511775.8;564295.8;1058779;852645.4;637022.5;331534.3;157688.6;41668.41;40151.56;0	0
20140904-PurClathDigest-1ug-01	MULTI	2	316.18678	630.35901	38162.57421875	11	7	2	NaN	0.359012	0.0290464727286235	0.972122	316.186641266708	32.009	14.895	0	2959	3023		-1		0				NaN	1420800	0;131652.4;696002.9;1129159;1328606;918403.9;353642.4;92479.05;0	0
20140904-PurClathDigest-1ug-01	MULTI	3	300.84318	899.50771	37618.03125	26	9	4	NaN	0.507711	0.0539377288359901	0.584328	300.843220510985	32.087	18.44	0	2983	3063		-1		0				NaN	22204000	0;1629711;1.613993E+07;2.212388E+07;1.771361E+07;4726803;2386196;958134.3;109456.6;247657.7;0	0
20140904-PurClathDigest-1ug-01	MULTI	2	300.62614	599.23772	38484.68359375	25	11	3	NaN	0.237721	-0.0779279078228683	0.652673	300.626072897982	32.059	22.375	0	2959	3055		-1		0				NaN	13276000	0;87030.95;968040.9;3414507;8336004;1.316195E+07;1.15389E+07;6978823;2383237;760715.1;372907.1;148941.6;0	1	2988	0	0
20140904-PurClathDigest-1ug-01	MULTI	3	317.17493	948.50297	39586.05859375	9	6	2	NaN	0.502974	0.0266623208025294	1.275453	317.174740863919	32.154	12.85	0	2999	3055		-1		0				NaN	693300	0;76961.47;471509.1;479788.8;273273.2;405928.4;213143.5;0	0
20140904-PurClathDigest-1ug-01	MULTI	2	318.18098	634.3474	36541.25390625	9	7	2	NaN	0.3474	0.0156001935533823	1.50628	318.180688191066	32.121	14.735	0	2983	3047		-1		0				NaN	452850	0;86390.91;174096.4;309028.7;376789;338366.9;271418.1;313258.3;0	0
20140904-PurClathDigest-1ug-01	MULTI	3	313.81578	938.42551	36296.046875	7	4	2	NaN	0.42551	-0.0461659903379541	2.261118	313.815491829153	32.201	9.32	0	3023	3063		-1		0				NaN	417360	0;369268.4;425347.9;308266.2;43045.19;0	0
20140904-PurClathDigest-1ug-01	MULTI	2	310.10799	618.20143	38460.2109375	7	4	2	NaN	0.201426	-0.122946854547308	3.217126	310.110524727479	32.239	9.32	0	3031	3071		-1		0				NaN	428710	0;274541.9;404319.4;282835;100611;0	0
20140904-PurClathDigest-1ug-01	MULTI	3	315.47865	943.41413	39185.2421875	22	13	2	NaN	0.414133	-0.0598371044569603	1.134786	315.478489848232	32.181	25.635	0	2991	3103		-1		0				NaN	771760	0;391496.2;452957.7;516272.6;553428.6;682829.9;784367.3;642110.8;281695.3;311604.6;186402.7;155910.8;117175.6;0;0	0
20140904-PurClathDigest-1ug-01	MULTI	2	313.6846	625.35464	39007.9453125	9	6	2	NaN	0.354642	0.0269792009779621	1.23854	313.684488870685	32.409	12.645	0	3063	3119		-1		0				NaN	364450	0;38947.64;200413;340798;278541.9;207651.1;0;0	0
20140904-PurClathDigest-1ug-01	MULTI	2	314.69279	627.37103	38531.84765625	10	6	2	NaN	0.371032	0.0424411182711992	2.160564	314.692557374095	32.348	12.805	0	3047	3103		-1		0				NaN	915330	0;106146;293628.1;480494.6;453007.2;855931;36516.91;0	0
20140904-PurClathDigest-1ug-01	MULTI	3	308.52746	922.56054	37218.921875	20	7	4	NaN	0.560537	0.0961594714276544	0.572585	308.527421659135	32.417	14.3	0	3071	3135		1586	IIAPPERK	8	Unmodified	_IIAPPERK_	F1MKC4;F1MRD0;P60712;Q3ZC07;Q5E9B5;P62739;P63258;P68138;G8JKX4	75.0475311279297	7323300	0;1242303;5588874;7296741;3816624;1780229;800816.9;138950.5;0	1	3101	0	0
20140904-PurClathDigest-1ug-01	MULTI	2	314.14912	626.28369	34340.05078125	7	6	2	NaN	0.283688	-0.0444024887375463	4.375039	314.14776358016	32.433	12.435	0	3079	3135		-1		0				NaN	181940	0;170131.5;124953;47162.33;30344.75;106408.1;0;0	0
20140904-PurClathDigest-1ug-01	MULTI	3	309.15979	924.45755	38343.57421875	14	7	3	NaN	0.457545	-0.00770500514533978	1.370863	309.159600569847	32.456	14.3	0	3071	3135		-1		0				NaN	1078300	0;41472.8;106420.7;408983.5;1054991;958818.1;310268.8;128806.3;0	0
20140904-PurClathDigest-1ug-01	MULTI	3	315.16317	942.46768	38576.92578125	11	5	3	NaN	0.467679	-0.00585648674984895	1.943748	315.162974090971	32.464	10.64	0	3087	3135		-1		0				NaN	917990	0;281683.6;901082;895412.3;552767.9;47104.86;0	0
20140904-PurClathDigest-1ug-01	MULTI	2	309.17886	616.34316	35663.73046875	8	5	2	NaN	0.343159	0.0196413371344306	1.523764	309.178821018994	32.483	10.64	0	3087	3135		-1		0				NaN	564910	0;123548.4;356266.6;532777;505915.5;329960.3;0	0
20140904-PurClathDigest-1ug-01	MULTI	2	316.19239	630.37024	37283.6328125	17	8	3	NaN	0.370235	0.0402651646832055	0.85316	316.192263402462	32.474	16.105	0	3071	3143		-1		0				NaN	5790000	0;92297.65;168197.4;1625068;4347437;5729204;4932106;1630623;204414.3;0	0
20140904-PurClathDigest-1ug-01	MULTI	4	303.64388	1210.5464	39666.61328125	10	5	3	NaN	0.546421	-0.0504300238637825	2.066124	303.644113564303	32.516	10.665	0	3095	3143		-1		0				NaN	954740	0;59839.54;261747.9;795670.8;915585.6;199633.7;0	0
20140904-PurClathDigest-1ug-01	MULTI	2	309.60824	617.20193	37624.19140625	10	4	3	NaN	0.201926	-0.12198662104629	4.258612	309.608713301084	32.555	8.89	0	3111	3151		-1		0				NaN	2335800	0;219535.5;1440592;2315696;884418.9;0	0
20140904-PurClathDigest-1ug-01	MULTI	3	305.84691	914.51889	NaN	5	3	2	NaN	0.518886	0.0582071722540149	3.87537	305.847503248334	32.582	7.195	0	3127	3159		-1		0				NaN	267820	0;239479.4;173577.4;85559.52;0	0
20140904-PurClathDigest-1ug-01	MULTI	3	307.11772	918.33134	NaN	6	3	2	NaN	0.331343	-0.131089180855724	3.959315	307.116844826922	32.564	7.135	0	3119	3151		-1		0				NaN	253340	0;119623;226533.7;161014.1;0	0
20140904-PurClathDigest-1ug-01	MULTI	2	300.1255	598.23645	32337.564453125	6	4	2	NaN	0.236453	-0.0787357162985245	2.339992	300.125627565331	32.588	8.935	0	3119	3159		-1		0				NaN	475410	0;185060.1;392043;448366.1;125273;0	0
20140904-PurClathDigest-1ug-01	MULTI	2	300.15831	598.30206	37448.625	12	9	2	NaN	0.302057	-0.0131617312729304	1.438856	300.158500728466	32.611	18.4	0	3119	3199		-1		0				NaN	1228800	0;364561.8;1158877;1166424;1183985;622351.9;368729.4;282034.6;165979;62762.3;0	0
20140904-PurClathDigest-1ug-01	MULTI	2	317.6633	633.31204	37851.83203125	15	6	3	NaN	0.312043	-0.0192808886978355	0.963584	317.663148078416	32.611	12.625	0	3119	3175		-1		0				NaN	7993300	0;292458.3;2869755;7525453;7909406;3678014;958857.1;0	1	3145	0	0
20140904-PurClathDigest-1ug-01	MULTI	2	300.19176	598.36897	38816.171875	13	10	2	NaN	0.36897	0.0537202628996738	2.655284	300.190986169007	32.629	20.44	0	3119	3207		-1		0				NaN	1240500	0;414144.7;1001813;977487.4;1169962;1069512;627592;271501.6;123847.7;70983.77;58054.03;0	0
20140904-PurClathDigest-1ug-01	MULTI	2	313.23321	624.45187	37538.453125	6	4	2	NaN	0.451871	0.124623279530283	4.145272	313.234855178673	32.789	9.75	0	3175	3215		-1		0				NaN	398300	0;149484.7;375638.9;295557.1;70065.02;0	0
20140904-PurClathDigest-1ug-01	MULTI	3	306.44255	916.30583	NaN	7	4	2	NaN	0.305825	-0.155675349573244	2.775869	306.442966349057	32.795	9.75	0	3175	3215		-1		0				NaN	172310	0;73595.96;154074.3;139818.1;75967.59;0	0
20140904-PurClathDigest-1ug-01	MULTI	2	313.26889	624.52323	40022.45703125	8	4	2	NaN	0.523233	0.195951838490373	4.04818	313.269598942	32.789	9.75	0	3175	3215		-1		0				NaN	321200	0;175971.8;302927;257042.1;105718.2;0	0
20140904-PurClathDigest-1ug-01	MULTI	2	313.07896	624.14336	36585.3359375	8	4	2	NaN	0.143359	-0.183747351996431	4.01793	313.080336598913	32.79	9.75	0	3175	3215		-1		0				NaN	393710	0;290436.6;371310.3;314594.4;211916.7;0	0
20140904-PurClathDigest-1ug-01	MULTI	2	313.11364	624.21273	41304.34765625	8	4	2	NaN	0.212728	-0.114409959435989	3.817962	313.114762880822	32.792	9.75	0	3175	3215		-1		0				NaN	349290	0;189782.3;329419.9;229790.2;183536.3;0	0
20140904-PurClathDigest-1ug-01	MULTI	1	327.96338	326.9561	32669.869140625	13	9	2	NaN	0.956102	-0.234297687272317	4.244762	327.965836005228	0.226	6.61	0	16	26		-1		0				NaN	2859.5	0;985.3685;1295.918;3215.038;3404.676;2301.698;3327.719;536.1594;894.8758;2336.996;0	0
20140904-PurClathDigest-1ug-01	MULTI	1	324.94807	323.94079	36585.4453125	6	4	2	NaN	0.94079	-0.248223186083862	3.555843	324.949459502411	0.472	3.375	0	41	46		-1		0				NaN	3091.6	0;2722.525;2088.185;3033.654;0;0	0
20140904-PurClathDigest-1ug-01	MULTI	1	325.94604	324.93876	NaN	6	4	2	NaN	0.938759	-0.250712522313393	4.174431	325.943667352035	0.638	3.3	0	56	61		-1		0				NaN	2170.1	0;1727.73;2809.119;1569.999;0;0	0
20140904-PurClathDigest-1ug-01	MULTI	1	327.96343	326.95615	35677.24609375	38	28	2	NaN	0.956151	-0.234248729554281	3.499898	327.965283495813	0.799	18.841	0	60	89		-1		0				NaN	4675.1	0;1467.248;1286.615;1105.982;1659.933;3567.506;3728.608;4556.263;1973.293;2532.98;2243.006;3188.117;2598.947;3825.385;2959.631;2037.033;574.1234;1990.051;1412.502;1331.445;1250.388;2626.205;659.5706;1336.567;1717.149;1988.719;1910.631;0;0;0	0
20140904-PurClathDigest-1ug-01	MULTI	1	327.96402	326.95674	38841.0625	11	7	2	NaN	0.95674	-0.2336599915227	4.333354	327.965010288445	0.993	5.34	0	87	95		-1		0				NaN	3646.8	0;808.8898;3113.035;3554.101;3030.657;2229.532;2120.098;1338.107;0	0
20140904-PurClathDigest-1ug-01	MULTI	1	325.94744	324.94016	NaN	9	8	2	NaN	0.940161	-0.249311042000727	3.457428	325.944649675864	1.47	5.85	0	131	140		-1		0				NaN	1841.9	0;1031.114;1807.389;1462.244;749.912;762.3546;774.7971;0;0;0	0
20140904-PurClathDigest-1ug-01	MULTI	1	327.97945	326.97218	NaN	9	7	2	NaN	0.972177	-0.218230283022649	3.501534	327.982291047188	2.003	5.19	0	179	187		-1		0				NaN	2609.2	0;2150.712;2290.308;2983.195;1104.184;1618.275;2132.366;0;0	0
20140904-PurClathDigest-1ug-01	MULTI	1	327.96273	326.95546	30980.828125	12	12	2	NaN	0.955457	-0.234942946294325	3.646434	327.963934625898	2.759	8.96	0	240	253		-1		0				NaN	2603.1	0;357.2749;487.9526;618.6302;578.8204;539.0105;631.922;746.198;860.4739;622.2803;977.0371;1187.727;1490.859;0	0
20140904-PurClathDigest-1ug-01	MULTI	1	324.96808	323.96081	NaN	4	2	2	NaN	0.960807	-0.228215466065137	4.926922	324.965800848598	2.823	2.07	0	254	257		-1		0				NaN	1910.6	0;1874.826;972.4425;0	0
20140904-PurClathDigest-1ug-01	MULTI	1	325.95632	324.94904	20342.806640625	4	2	2	NaN	0.949042	-0.240434908579516	6.823457	325.957781692025	3.062	2.185	0	274	277		-1		0				NaN	3055.6	0;982.0066;2998.353;0	0
20140904-PurClathDigest-1ug-01	MULTI	1	327.96458	326.9573	35279.9765625	31	24	2	NaN	0.9573	-0.233100802351316	3.882632	327.966024130544	3.042	17.66	0	265	290		-1		0				NaN	4186.5	0;2616.669;1381.974;1417.121;1815.835;2074.903;1600.152;4080.065;1699.784;1740.491;2560.081;1308.806;1838.762;1475.609;1167.415;859.2211;664.2541;808.8762;892.645;593.0734;0;0;0;0;0;0	0
20140904-PurClathDigest-1ug-01	MULTI	1	324.96187	323.95459	NaN	5	4	2	NaN	0.95459	-0.234429344168859	3.852381	324.962262968111	3.212	3.615	0	285	290		-1		0				NaN	2556.2	0;689.2646;545.1833;800.08;1705.651;0	0
20140904-PurClathDigest-1ug-01	MULTI	1	324.95258	323.9453	24341.28125	4	2	2	NaN	0.945305	-0.243710076887169	7.311928	324.949895589509	3.264	2.21	0	291	294		-1		0				NaN	3793.8	0;1627.243;3722.717;0	0
20140904-PurClathDigest-1ug-01	MULTI	1	324.95838	323.9511	NaN	5	3	2	NaN	0.9511	-0.23791722934277	4.236882	324.95753152021	3.366	2.835	0	299	303		-1		0				NaN	1739	0;898.949;1706.467;1805.272;0	0
20140904-PurClathDigest-1ug-01	MULTI	1	324.95305	323.94577	22877.98046875	10	8	2	NaN	0.945773	-0.243241860067428	4.031421	324.954732218119	3.749	6.38	0	329	338		-1		0				NaN	4052.5	0;1006.196;1663.131;3976.62;951.859;1958.26;1315.333;2125.657;0;0	0
20140904-PurClathDigest-1ug-01	MULTI	1	325.9842	324.97692	36779.9765625	362	217	2	NaN	0.976923	-0.212566077500753	1.353435	325.986298124347	2.085	148.016	0	93	311		-1		0				NaN	28530	0;4464.673;7923.652;8402.1;7985;6237.855;6328.329;9286.905;6983.415;9494.579;8857.542;10854.01;8076.817;7727.398;11106.88;10639.37;8728.724;8854.189;8486.121;5212.7;14207.25;18982.11;18075.85;22566.04;19097.16;21013.97;18761.22;18675.16;18476.01;16949.68;23588.46;28277.88;23129.12;27251.24;19278.44;19483.6;18716.34;17901.62;20251.47;26963.78;20134.2;29348.73;22113.79;20269.99;26891.67;23829.96;18…	0
20140904-PurClathDigest-1ug-01	MULTI	1	327.96367	326.9564	32625.259765625	27	21	2	NaN	0.956397	-0.234002938461288	3.238904	327.96523178591	3.73	15.54	0	321	343		-1		0				NaN	2211.5	0;1404.427;866.4496;695.0704;1021.264;1063.711;1797.274;2427.447;1911.246;1322.976;2879.079;2939.199;1845.355;2250.589;1545.132;1196.103;1473.141;508.4458;960.8114;1413.177;0;0;0	0
20140904-PurClathDigest-1ug-01	MULTI	1	326.96606	325.95879	35916.69140625	35	21	2	NaN	0.958786	-0.231154704448159	2.109899	326.966743677092	3.962	14.775	0	342	364		-1		0				NaN	12058	0;1161.121;6494.144;7695.265;8146.212;8839.529;6629.405;6788.445;6791.076;7883.988;7582.585;8269.83;9296.909;8029.356;10820.56;11431.44;9063.013;6291.883;5818.109;0;0;0;0	0
20140904-PurClathDigest-1ug-01	MULTI	1	327.96384	326.95656	NaN	5	4	2	NaN	0.956559	-0.233841207266266	3.768808	327.965254537421	4.342	3.365	0	383	388		-1		0				NaN	2476.2	0;487.5146;658.1115;1628.096;1553.971;0	0
20140904-PurClathDigest-1ug-01	MULTI	1	327.96319	326.95592	38806.890625	21	13	2	NaN	0.955918	-0.23448123905996	4.255889	327.965251583079	4.739	9.39	0	415	429		-1		0				NaN	4049.8	0;1379.237;1351.734;2816.263;2754.932;2621.982;1110.851;2069.443;3946.886;3295.208;3138.03;884.2513;1649.846;0;0	0
20140904-PurClathDigest-1ug-01	MULTI	1	326.98364	325.97637	35086.93359375	21	13	3	NaN	0.976368	-0.213580726152202	2.565915	326.98456613118	5.025	9.325	0	440	454		-1		0				NaN	15011	0;5929.5;4287.005;8709.467;11724.87;4953.152;7027.185;12599.71;12886.99;14970.97;12071.2;12350.09;8234.065;5549.382;0	0
20140904-PurClathDigest-1ug-01	MULTI	1	329.32354	328.31626	35691.42578125	9	8	2	NaN	0.316264	0.12523852009798	2.17636	329.323465388866	5.205	5.72	0	459	468		-1		0				NaN	29395	0;729.6602;1117.76;1505.859;2085.963;28647.34;25383.77;633.107;0;0	0
20140904-PurClathDigest-1ug-01	MULTI	1	324.94581	323.93854	NaN	4	2	2	NaN	0.938536	-0.250475786585127	4.113235	324.945515348733	5.25	2.01	0	467	470		-1		0				NaN	2136.8	0;2096.778;2452.69;0	0
20140904-PurClathDigest-1ug-01	MULTI	1	328.96643	327.95915	37836.05078125	18	14	2	NaN	0.959155	-0.231706515785675	4.13101	328.964134928031	5.324	10.84	0	467	482		-1		0				NaN	2965.4	0;742.3782;451.1484;1685.516;1601.1;1516.683;1197.914;2890.017;2417.11;2305.462;520.5555;881.2536;0;0;0;0	0
20140904-PurClathDigest-1ug-01	MULTI	1	324.95353	323.94626	33669.5859375	6	4	2	NaN	0.946257	-0.242757948638427	4.152859	324.952196499347	5.576	4.15	0	492	497		-1		0				NaN	2034	0;1627.245;1995.866;2123.228;0;0	0
20140904-PurClathDigest-1ug-01	MULTI	1	327.98228	326.975	39694.25390625	9	5	2	NaN	0.975003	-0.215405614834651	3.627539	327.982705499886	5.777	5.26	0	506	512		-1		0				NaN	1925.2	0;1876.245;1513.538;1090.197;899.3085;753.4221;0	0
20140904-PurClathDigest-1ug-01	MULTI	1	328.96642	327.95914	38223.80859375	55	37	2	NaN	0.959142	-0.231719474906129	3.831781	328.963104268956	5.702	31.835	0	482	520		-1		0				NaN	2666	0;690.3452;1103.917;924.0391;575.9518;654.113;995.4985;770.9837;1053.759;938.7042;1234.851;1366.757;853.2224;1859.324;1563.982;1745.383;1254.243;1661.076;2560.47;2652.593;2598.277;1231.989;2116.679;1291.736;2014.004;2874.405;2293.56;1633.187;1372.532;1369.977;1410.341;2418.085;1495.663;1867.984;533.7233;0;0;0;0	0
20140904-PurClathDigest-1ug-01	MULTI	1	325.95149	324.94421	NaN	4	2	2	NaN	0.94421	-0.245264384308655	4.157806	325.953965007796	6.045	2.73	0	525	528		-1		0				NaN	753.68	0;663.7569;739.5627;0	0
20140904-PurClathDigest-1ug-01	MULTI	1	324.95655	323.94927	NaN	10	8	2	NaN	0.949272	-0.239744636513308	3.930733	324.95861033175	6.181	7.77	0	531	540		-1		0				NaN	1554.8	0;297.2857;539.6481;1383.926;1436.305;1525.72;1296.223;0;0;0	0
20140904-PurClathDigest-1ug-01	MULTI	1	324.94767	323.94039	NaN	4	2	2	NaN	0.94039	-0.248622875953174	4.093331	324.945401289247	6.249	2.64	0	539	542		-1		0				NaN	1291.4	0;1267.196;1366.984;0	0
20140904-PurClathDigest-1ug-01	MULTI	1	324.95616	323.94888	32292.791015625	5	4	2	NaN	0.948884	-0.240132641509717	3.942703	324.955555377176	6.331	4.39	0	543	548		-1		0				NaN	1977.5	0;386.5219;282.0949;1940.418;191.889;0	0
20140904-PurClathDigest-1ug-01	MULTI	1	327.96196	326.95468	34705.6015625	79	61	2	NaN	0.954684	-0.235714821711099	2.5548	327.964179782553	6.362	54.775	0	516	578		-1		0				NaN	2836.2	0;739.0456;789.3712;785.0704;1068.579;829.9654;1095.925;1556.644;1100.759;1423.073;427.2647;729.4878;440.8184;1302.454;1487.835;1367.88;1015.884;889.0331;725.1326;847.6175;1117.82;1088.308;671.3107;1688.628;1936.753;1734.553;1600.269;1223.014;2382.936;2764.149;3347.885;1521.716;2045.066;3147.496;1464.606;1866.241;2233.15;2185.603;1023.082;2404.974;2285.106;2783.198;1249.651;2034.635;1707.958;1083…	0
20140904-PurClathDigest-1ug-01	MULTI	1	328.96598	327.95871	33286.90625	26	15	2	NaN	0.958708	-0.232152512564255	4.089708	328.962540249171	6.664	14.24	0	561	577		-1		0				NaN	2298.8	0;706.0197;1103.296;2562.397;1444.499;1656.588;1954.446;2411.09;1983.79;1701.199;1259.152;2552.917;1545.993;1188.608;330.1389;1878.704;0	0
20140904-PurClathDigest-1ug-01	MULTI	7	331.01657	2310.0651	36068.76171875	6	4	2	NaN	0.065055	-0.0375748071842281	3.661603	331.160325181732	7.274	4.665	0	608	613		-1		0				NaN	2278.3	0;730.1643;548.374;737.8951;444.8427;0	0
20140904-PurClathDigest-1ug-01	MULTI	1	327.96261	326.95533	46754.765625	41	24	2	NaN	0.955329	-0.23507036625864	3.773711	327.964507732717	6.959	21.69	0	577	602		-1		0				NaN	2321.4	0;815.839;1627.007;1795.967;2335.865;2226.015;1588.329;1524.206;2000.672;1680.651;2093.805;1115.7;1834.536;1718.556;1446.425;2541.935;1721.451;2240.353;1964.048;2262.43;1592.365;1474.65;460.2285;0;0;0	0
20140904-PurClathDigest-1ug-01	MULTI	1	327.96257	326.9553	46754.76171875	31	19	2	NaN	0.955296	-0.235103757466163	3.67537	327.96441018239	7.274	19.045	0	601	623		-1		0				NaN	2593.5	0;482.6533;765.8065;1513.799;1270.433;922.6424;2114.931;1588.513;1994.988;1795.816;2228.888;1400.923;2527.565;1489.875;1559.922;1118.362;646.6719;651.4314;0;0;0	0
20140904-PurClathDigest-1ug-01	MULTI	1	324.98462	323.97734	37875.4375	218	83	4	NaN	0.97734	-0.211689956846726	1.507987	324.986269749812	7.232	75.81	0	570	656		-1		0				NaN	92621	0;35095.5;39885.77;51616.03;54010.89;53991.52;53574.02;50918.74;38238.4;53820.87;65857.62;54876.6;44999.77;42150.33;41600.02;44249.06;55791.98;57010.71;46374.74;49227.27;46049.11;37234.66;51901.9;57926.02;92609.43;63017.1;62074;67949.52;50691.09;43530.81;46032.78;40156.38;39017.3;56882.59;41132.38;41111.32;43943.81;34964.39;39218.73;42809.8;36626.3;43319.4;34628.03;68482.94;57416.38;37633.23;3494…	0
20140904-PurClathDigest-1ug-01	MULTI	1	327.9627	326.95542	38704.13671875	33	23	2	NaN	0.955423	-0.234976266305125	3.710923	327.964514043523	7.56	22.42	0	617	643		-1		0				NaN	2586.5	0;383.3097;930.9684;953.0799;294.9108;1437.641;1302.786;1148.041;2191.118;2110.595;1503.727;3120.878;2443.464;976.7787;1635.518;1029.122;1175.001;619.8232;1292.786;1133.579;974.3728;507.5161;0;0;0	0
20140904-PurClathDigest-1ug-01	MULTI	1	330.11389	329.10661	NaN	10	6	2	NaN	0.106615	-0.0847741784417053	4.375555	330.112456089377	7.657	6.555	0	634	641		-1		0				NaN	1229	0;1018.178;503.417;620.9784;1197.807;1076.032;0;0	0
20140904-PurClathDigest-1ug-01	MULTI	5	326.98355	1629.8814	34731.140625	53	35	2	NaN	0.881352	0.0916063946817758	0.870926	326.983687759637	7.639	33.305	0	617	655		-1		0				NaN	13410	0;2906.16;3072.358;6262.081;5838.982;6372.17;7395.905;4933.367;7071.538;6567.771;5994.52;9548.456;5207.281;5216.047;4502.232;5571.621;5071.778;5269.715;3143.293;4412.881;4836.355;4094.584;3708.01;6830.798;3937.371;4739.796;5715.512;2981.676;3993.194;4671.603;3554.788;5557.039;3774.471;6099.657;4075.927;3001.935;0	0
20140904-PurClathDigest-1ug-01	MULTI	4	326.93166	1303.6975	NaN	6	5	2	NaN	0.697523	0.0578221610985565	3.763855	326.931061453054	7.807	5.615	0	645	651		-1		0				NaN	1346.1	0;713.132;1099.706;334.8772;368.4038;0;0	0
20140904-PurClathDigest-1ug-01	MULTI	1	327.96287	326.9556	38704.15625	18	13	2	NaN	0.955598	-0.2348019550613	3.448214	327.964140252633	7.869	12.79	0	643	657		-1		0				NaN	2077.3	0;330.4752;427.6043;524.7335;721.8631;1118.113;492.9297;1343.714;2024.528;1845.204;817.3044;759.718;1242.901;0;0	0
20140904-PurClathDigest-1ug-01	MULTI	1	330.11476	329.10748	NaN	4	2	2	NaN	0.107483	-0.0839062550408016	3.553766	330.113385724056	7.92	2.735	0	653	656		-1		0				NaN	1547.4	0;1508.064;1694.023;0	0
20140904-PurClathDigest-1ug-01	MULTI	1	325.95656	324.94928	21859.140625	5	3	2	NaN	0.949283	-0.240194075786576	4.558348	325.957920583591	8.219	3.705	0	672	676		-1		0				NaN	2054.1	0;1738.603;712.2936;717.1814;0	0
20140904-PurClathDigest-1ug-01	MULTI	1	333.01855	332.01127	NaN	5	4	2	NaN	0.01127	-0.181454933024384	6.467961	333.014988561685	8.472	4.76	0	687	692		-1		0				NaN	1013.4	0;274.7764;302.6156;595.2537;358.022;0	0
20140904-PurClathDigest-1ug-01	MULTI	5	323.00579	1609.9925	NaN	6	4	2	NaN	0.992544	0.211947016186059	3.832871	323.205702150675	8.579	4.79	0	694	699		-1		0				NaN	1499	0;268.6547;1068.531;952.7877;785.356;0	0
20140904-PurClathDigest-1ug-01	MULTI	7	329.03696	2296.2078	NaN	5	4	2	NaN	0.207761	0.111505899586064	3.720125	329.180744689332	8.623	4.785	0	698	703		-1		0				NaN	1849.9	0;1080.398;734.6404;275.5977;0;0	0
20140904-PurClathDigest-1ug-01	MULTI	1	320.14966	319.14239	37519.9921875	33	20	2	NaN	0.142387	-0.0444187423675544	4.214805	320.145669758048	8.283	19.155	0	668	689		-1		0				NaN	1788.3	0;321.6953;442.3201;1635.543;1811.772;1486.278;1963.513;2124.095;1144.679;1644.976;2015.362;2025.048;1552.137;1456.256;1754.82;1013.43;1149.359;1268.095;939.1404;464.9861;558.2416;0	0
20140904-PurClathDigest-1ug-01	MULTI	1	329.32285	328.31557	36939.140625	17	17	2	NaN	0.315575	0.124549755875535	0.567795	329.322777543716	8.888	16.59	0	710	728		-1		0				NaN	9668.5	0;1600.332;7432.489;937.8175;1991.24;7783.296;845.1187;781.0262;334.2739;4118.019;7901.764;851.1858;624.4208;397.6558;268.0074;0;0;0;0	0
20140904-PurClathDigest-1ug-01	MULTI	1	326.96453	325.95725	36624.8046875	129	83	2	NaN	0.95725	-0.232690402405012	0.85919	326.965731132901	8.655	77.885	0	657	741		-1		0				NaN	8354.8	0;2990.707;2862.846;4433.901;4745.841;4933.505;4834.012;5656.35;3915.059;4829.375;4241.38;5251.322;6058.942;4253.313;3633.975;4446.853;4130.547;4062.226;5429.785;4856.098;3301.241;4871.679;3878.992;4667.445;4373.799;4689.866;3037.672;6828.055;5354.606;5096.447;4300.09;3663.402;4669.555;3758.932;3486.177;3743.519;5712.587;4179.371;3775.401;5372.143;5313.166;5361.644;5077.594;3567.547;4849.845;6662…	0
20140904-PurClathDigest-1ug-01	MULTI	1	325.98287	324.97559	38706.546875	73	29	3	NaN	0.975591	-0.213897475660701	3.379778	325.98507172783	9.443	27.24	0	737	767		-1		0				NaN	13072	0;528.8797;659.0645;269.0056;3978.889;4344.194;7521.364;10575.69;8149.042;8664.783;8415.065;8759.235;7952.871;8344.33;9360.941;8684.046;13049.62;7002.571;10299.2;10475.02;6310.224;12007.15;7788.983;8848.797;8721.377;7308.192;9437.047;6933.407;3145.9;4764.248;0	0
20140904-PurClathDigest-1ug-01	MULTI	1	327.07765	326.07038	32895.0625	64	46	2	NaN	0.070376	-0.11961599009453	0.61211	327.077567419542	9.878	41.835	0	765	812		-1		0				NaN	6193.9	0;357.981;3419.591;2643.129;3892.044;3537.641;2353.389;3328.907;4447.807;4021.005;2950.073;3990.073;3624.957;3957.276;3238.337;3095.918;4251.037;3913.657;6036.485;3893.533;6484.409;4436.931;4192.28;3437.006;4462.749;3869.145;3827.021;2740.741;3322.123;4580.334;427.5056;291.4783;400.7585;679.8271;470.5931;308.1205;302.2019;0;0;0;0;0;0;0;0;0;0;0	0
20140904-PurClathDigest-1ug-01	MULTI	1	331.02749	330.02022	33900.33984375	25	19	2	NaN	0.020218	-0.171591394011898	4.321578	331.030006809161	10.452	17.965	0	812	832		-1		0				NaN	1583	0;386.0905;636.9365;613.5225;902.2861;1115.732;1009.315;856.9939;1542.809;1222.847;962.095;835.7404;505.8915;487.5303;413.2754;244.741;1019.394;0;0;0;0	0
20140904-PurClathDigest-1ug-01	MULTI	1	324.95837	323.95109	NaN	4	2	2	NaN	0.951089	-0.237928852478717	5.315801	324.960201328745	10.706	2.65	0	837	840		-1		0				NaN	2377.1	0;2332.56;1182.757;0	0
20140904-PurClathDigest-1ug-01	MULTI	1	327.07748	326.0702	32895.04296875	36	25	2	NaN	0.070201	-0.11979111998545	0.759438	327.077433321693	10.572	23.205	0	812	838		-1		0				NaN	6472	0;300.3587;491.088;273.6705;416.9949;521.0145;415.0005;308.9866;607.1594;850.5446;350.2831;3572.823;3132.845;4786.828;5444.621;4964.15;4789.548;4994.259;4220.117;4801.098;5171.344;6307.482;3742.793;3588.212;4411.283;2412.197;0	0
20140904-PurClathDigest-1ug-01	MULTI	1	327.07759	326.07031	34759.078125	38	27	2	NaN	0.070311	-0.119681667004272	0.63361	327.077474394237	10.9	24.42	0	838	866		-1		0				NaN	6141.3	0;3257.525;2548.075;4329.773;4280.564;3909.148;3567.354;3598.92;3446.458;4730.685;5985.222;6210.907;3065.177;5316.189;5992.521;5492.14;3772.167;5003.097;4035.446;3990.011;3426.805;3128.545;4393.683;4541.864;3732.153;3324.469;2847.932;1872.811;0	0
20140904-PurClathDigest-1ug-01	MULTI	1	331.02877	330.02149	NaN	9	9	2	NaN	0.021489	-0.170320981537088	4.29987	331.030305451431	11.224	8.67	0	868	878		-1		0				NaN	1374.6	0;634.9124;584.4365;533.9607;648.0281;711.2714;1077.996;961.8239;0;0;0	0
20140904-PurClathDigest-1ug-01	MULTI	1	322.95545	321.94818	NaN	5	3	2	NaN	0.948177	-0.239919297574261	2.911395	322.955686428296	11.336	3.22	0	880	884		-1		0				NaN	2016.6	0;810.7983;1978.844;523.7119;0	0
20140904-PurClathDigest-1ug-01	MULTI	1	324.98456	323.97728	37188.69140625	69	22	4	NaN	0.97728	-0.211749807060471	3.053255	324.986129862816	11.267	19.645	0	865	888		-1		0				NaN	76868	0;22163.52;28330.03;31788.41;34802.67;47063.23;49929.27;31991.65;56315.65;34461.84;42009.45;46538.91;48366.5;45574.42;48889.94;54201.75;47162.12;76858.49;71824.98;49747.76;37895.15;36922.61;0;0	0
20140904-PurClathDigest-1ug-01	MULTI	1	324.98451	323.97723	36626.953125	140	44	4	NaN	0.977229	-0.21180041879893	2.559884	324.986143673119	11.708	38.17	0	887	932		-1		0				NaN	68649	0;29382.63;29892.55;56947.73;41580.45;40456.25;41288.32;47208.68;38560.89;38150.62;41626.11;37554.86;33220.21;41130.29;46288.81;43997.94;49211.45;43589.72;62423.29;39719.18;34660.89;48445.53;68640.37;63420.76;53605.46;59104.7;54731.61;41205.89;38760.78;58423.47;62674.39;44222.74;68609.77;52376.93;36505.03;40148.18;50589.01;35745.05;63903.77;36331.23;10240.9;10833.75;9762.727;4813.581;3888.268;0	0
20140904-PurClathDigest-1ug-01	MULTI	1	330.32605	329.31877	40010.16015625	5	3	2	NaN	0.318772	0.12728498433836	6.337446	330.327025695131	12.167	3.255	0	940	944		-1		0				NaN	16966	0;16534.44;4547.227;791.3857;0	0
20140904-PurClathDigest-1ug-01	MULTI	1	324.95728	323.95	NaN	7	6	2	NaN	0.950005	-0.239012023141981	4.362265	324.957079542431	12.216	5.585	0	941	948		-1		0				NaN	4375.7	0;821.7471;1022.842;1223.938;4293.716;1676.09;0;0	0
20140904-PurClathDigest-1ug-01	MULTI	1	327.96247	326.9552	38008.05078125	49	32	2	NaN	0.955197	-0.23520200292063	3.118308	327.964198745222	12.141	27.465	0	919	952		-1		0				NaN	2609.9	0;558.5538;826.765;668.236;1186.598;551.6471;930.3196;381.31;886.8235;385.7286;640.0531;425.9758;535.3174;644.6589;744.46;1074.287;1853.326;1455.015;2600.782;2543.542;1603.866;2644.12;1459.975;1533.466;1946.448;2673.394;1706.932;1760.705;1723.27;1406.996;2401.867;1401.749;0;0	0
20140904-PurClathDigest-1ug-01	MULTI	1	327.98049	326.97321	35276.03125	8	7	2	NaN	0.973213	-0.217194974301549	4.293735	327.981508167822	12.336	6.775	0	949	957		-1		0				NaN	2237.8	0;876.2209;589.7468;487.5476;602.5239;1004.333;2180.885;0;0	0
20140904-PurClathDigest-1ug-01	MULTI	1	327.98108	326.9738	59042.51171875	6	4	2	NaN	0.973804	-0.216603550888635	3.661386	327.981772650872	12.423	3.975	0	958	963		-1		0				NaN	1221.8	0;1173.914;1205.316;1456.972;0;0	0
20140904-PurClathDigest-1ug-01	MULTI	1	332.99856	331.99128	36334.73828125	100	75	2	NaN	0.991279	-0.201436598775217	0.567645	332.99853057166	10.225	67.705	0	765	841		-1		0				NaN	20677	0;7256.14;8011.619;7859.793;9269.976;9857.256;7056.104;11315.21;10722.54;13842.68;8935.285;9177.541;8813.796;10914.1;11043.92;8270.098;10386.02;9432.652;11474.7;6486.314;12880.61;11322.6;15129.93;9734.123;8512.363;11216.21;10659;10264.71;10251.77;10391.43;10394.48;6726.761;8343.884;12682.32;9446.458;11190.84;8817.875;14253.95;14918.45;11894.28;11930.49;10138.62;7506.366;10312.2;13512.71;13758.1;1…	0
20140904-PurClathDigest-1ug-01	MULTI	1	327.07761	326.07033	35379.66015625	49	32	2	NaN	0.070334	-0.119658649599671	0.923524	327.077507475276	11.272	28.66	0	861	894		-1		0				NaN	7923.5	0;492.952;709.0582;380.7719;396.8257;814.0681;4604.78;3693.586;3252.836;4323.425;4445.469;3105.913;7722.096;3641.634;4634.566;5114.57;4748.34;5296.769;4193.234;7222.322;5738.028;6596.097;7135.346;5230.796;4925.859;3941.963;3780.947;605.3942;377.9507;0;0;0;0;0	0
20140904-PurClathDigest-1ug-01	MULTI	1	323.95947	322.9522	39306.7265625	6	5	2	NaN	0.952197	-0.236361193729351	4.167768	323.958336121864	12.471	4.555	0	962	968		-1		0				NaN	5183.8	0;4625.53;5086.653;1384.697;812.0265;0;0	0
20140904-PurClathDigest-1ug-01	MULTI	1	325.29197	324.28469	37461.85546875	15	14	3	NaN	0.284694	0.0955233776661544	2.935237	325.29161783987	12.628	13.14	0	971	988		-1		0				NaN	60855	0;1867.536;39586.95;60751.1;4323.632;954.1547;761.7703;625.9592;490.1481;1402.452;21380.11;11083.31;0;0;0;0	0
20140904-PurClathDigest-1ug-01	MULTI	1	329.3228	328.31552	37256.28125	31	20	3	NaN	0.315522	0.124497120448495	2.486459	329.322690889778	12.642	17.94	0	969	992		-1		0				NaN	314880	0;1659.689;1350.763;2782.013;150888.9;314044.3;29036.13;7693.017;8943.989;3231.648;5964.457;14857.48;137572.1;2045.847;2608.069;5331.994;8055.919;561.4805;1172.078;3209.94;0;0	0
20140904-PurClathDigest-1ug-01	MULTI	1	324.94336	323.93609	35149.98046875	14	10	2	NaN	0.936086	-0.252924955868991	3.724125	324.942767571396	12.713	9.66	0	975	987		-1		0				NaN	7417.1	0;352.4559;2966.021;798.0288;2952.336;2642.631;985.3453;3902.386;2423.13;1666.764;6277.989;0	0
20140904-PurClathDigest-1ug-01	MULTI	1	325.98277	324.97549	38706.53515625	81	36	3	NaN	0.975495	-0.213994082059742	3.173413	325.985168886677	12.626	30.51	0	954	993		-1		0				NaN	18097	0;3835.313;5971.155;2923.589;6863.082;5134.323;5874.248;4916.299;1845.164;6093.472;5866.739;11957.36;9010.302;10974.53;16671.1;11896.24;11593.38;12958.58;16178.45;14952.76;8761.461;12343.2;12950.99;10422.85;12959.8;12819.76;8385.836;18062.93;10919.21;10420.71;10448.76;9357.094;7928.573;15566.57;8027.761;9917.465;4362.118;0	0
20140904-PurClathDigest-1ug-01	MULTI	1	327.07769	326.07041	37212.01171875	55	33	2	NaN	0.070409	-0.119583209965526	0.633324	327.077609698713	12.686	27.34	0	964	1000		-1		0				NaN	7909.6	0;4489.675;4588.545;3719.162;6686.325;6597.136;5202.127;5550.163;3913.339;7708.563;4154.843;4950.609;5759.944;5240.386;5717.938;6097.429;5349.71;7218.719;3826.101;3712.295;3352.494;4502.368;4562.099;4275.443;3207.329;3119.366;3386.261;1832.195;3673.375;6064.295;3857.108;3036.991;2766.62;3031.473;0	0
20140904-PurClathDigest-1ug-01	MULTI	1	327.98131	326.97403	NaN	14	12	2	NaN	0.974031	-0.216377465448772	2.280399	327.981436003141	12.946	9.82	0	994	1007		-1		0				NaN	1604.5	0;1311.341;570.4976;586.8704;603.2431;578.0131;1081.188;1081.183;672.2914;1749.64;709.959;0;0;0	0
20140904-PurClathDigest-1ug-01	MULTI	1	326.96414	325.95686	37896.76953125	33	22	3	NaN	0.956865	-0.233075462499471	2.325576	326.965508514698	12.978	16.56	0	992	1015		-1		0				NaN	9306.8	0;3384.499;1084.488;6721.95;4805.048;3959.311;3144.608;4677.68;5691.533;4048.751;4416.46;5753.618;8088.213;9281.933;6108.292;6772.324;3428.996;4259.377;2727.332;4207.296;4179.814;4278.084;2771.121;0	0
20140904-PurClathDigest-1ug-01	MULTI	1	331.15971	330.15243	36765.8359375	340	241	2	NaN	0.152433	-0.0394373743199594	0.372868	331.159670824285	9.838	218.66	0	623	865		-1		0				NaN	32295	0;905.9036;644.1576;1344.042;729.9912;812.8224;1444.637;1638.051;1505.354;1493.43;581.7148;888.4696;947.7263;1115.231;1260.484;1400.66;1697.688;1392.954;1190.805;1524.154;2301.344;2204.481;1309.99;1933.708;2193.221;1954.13;2500.373;1945.929;2765;3286.902;3914.404;3595.072;3520.669;2381.591;3977.005;2689.693;4074.84;4222.602;3612.581;3264.022;5006.485;3730.172;4545.031;2953.322;5239.909;5435.599;5…	0
20140904-PurClathDigest-1ug-01	MULTI	4	331.91162	1323.6174	37554.04296875	31	20	2	NaN	0.617361	-0.0315032037708534	1.2681	332.162928867622	11.74	17.395	0	899	920		-1		0				NaN	5928.7	0;2287.795;1846.962;1611.114;2057.892;1521.779;2084.924;2025.456;1358.015;3549.828;3614.98;3480.037;2764.369;2813.484;2893.043;1931.977;3216.542;4843.569;2033.566;1922.417;339.3256;0	0
20140904-PurClathDigest-1ug-01	MULTI	4	331.91181	1323.6182	37554.06640625	32	18	2	NaN	0.618153	-0.0307113012322588	1.184852	332.162924539803	11.993	16.01	0	919	938		-1		0				NaN	11166	0;1661.401;1564.842;1992.322;4489.962;2613.263;5261.743;1629.046;2701.759;2350.392;3911.964;2489.731;3767.439;4853.788;3275.973;4137.55;3766.798;1910.529;1191.541;0	0
20140904-PurClathDigest-1ug-01	MULTI	4	331.91161	1323.6173	37554.04296875	61	36	2	NaN	0.61733	-0.0315338478515059	1.1209	331.911201443548	12.349	29.75	0	935	972		-1		0				NaN	9147.2	0;477.4316;755.6614;457.6014;3028.328;2181.256;2805.136;3451.203;3224.669;3149.99;4499.746;2227.396;4012.386;2421.832;3869.005;3347.101;3998.287;4720.541;4012.294;4097.944;2688.343;4235.207;3145.632;5158.816;3868.748;3844.785;3749.923;2546.5;7472.925;4195.043;677.9556;1208.827;516.5427;1037.083;1145.095;1031.748;608.5902;0	0
20140904-PurClathDigest-1ug-01	MULTI	1	331.15995	330.15267	36765.859375	29	23	2	NaN	0.152669	-0.0392016088400737	1.055719	331.159934590442	13.05	18.645	0	999	1025		-1		0				NaN	58820	0;24330.25;7743.842;18627.09;28520.91;27058.64;31673.1;27491.05;14684.87;16682.19;16529.31;13079.11;16749.12;16637.25;18786.78;9751.213;48071.13;9634.054;9655.842;13406.84;15961.23;17623.81;11649.6;4870.628;0	0
20140904-PurClathDigest-1ug-01	MULTI	1	327.96293	326.95565	NaN	6	4	2	NaN	0.955652	-0.234747134802603	4.135415	327.963562622104	13.099	3.575	0	1011	1016		-1		0				NaN	3106.1	0;708.2917;1402.522;1101.789;2538.53;0	0
20140904-PurClathDigest-1ug-01	MULTI	1	326.96491	325.95764	30560.2578125	12	9	2	NaN	0.957635	-0.232305154572998	3.576302	326.965634361341	13.154	8.68	0	1014	1026		-1		0				NaN	13526	0;11054.25;3145.52;1570.242;7833.982;6578.404;9403.723;2536.862;1649.383;1996.652;0	0
20140904-PurClathDigest-1ug-01	MULTI	1	324.98447	323.9772	37188.6796875	197	98	3	NaN	0.977198	-0.211831922801082	1.176925	324.98607768272	10.494	87.575	0	767	866		-1		0				NaN	68723	0;17847.53;24977.88;15082.7;23766.46;26627.14;24887.66;25521.63;20765.34;21187.06;21800.46;27258.96;23897.34;28495.57;36299.5;22964.05;29552.96;22573.09;31174.52;26078.75;42002.52;23150.31;21834.54;24447.54;23322.28;21179.57;20116.33;30194.64;20296.2;18064.82;21415.4;26726.51;27597.93;37665.2;19121.81;25604.67;27560.01;24842.99;25986.59;18823.59;28187.55;36573.49;26935.1;23478.84;17421.13;20463.5…	0
20140904-PurClathDigest-1ug-01	MULTI	1	325.98342	324.97615	36748.85546875	74	48	2	NaN	0.976148	-0.213341113697027	2.342287	325.985077156087	9.952	43.575	0	767	816		-1		0				NaN	15861	0;5806.754;11347.9;5569.951;8369.678;8647.961;8594.256;7361.269;5816.273;8212.229;7364.993;7418.088;8034.399;7916.209;12297.05;6864.717;10055.55;7911.604;12010.88;9133.08;15563.5;8006.65;8827.511;7372.573;7426.877;8071.651;6277.992;5976.32;4311.66;3546.643;5042.232;6184.121;4815.427;6847.44;3579.167;4504.086;5483.913;4894.397;4825.204;3097.493;4658.862;5881.625;5661.587;4627.85;2971.55;4821.034;3…	0
20140904-PurClathDigest-1ug-01	MULTI	1	324.98482	323.97755	37188.71875	203	111	3	NaN	0.977546	-0.211484137341188	1.961459	324.986224517432	8.978	103.285	0	655	767		-1		0				NaN	60112	0;3136.818;4526.98;3307.362;4622.05;4601.654;3683.831;5284.204;3895.607;4386.027;3773.892;4048.776;3971.812;5110.389;6489.474;5094.244;4400.608;4552.361;4637.117;4469.831;6861.517;4814.398;3682.38;4880.857;6583.075;3515.73;4615.249;6576.924;3952.784;4161.19;4970.717;5130.169;4377.743;3589.596;3385.785;3371.923;4198.467;3687.142;4337.891;29492.48;28110.2;37218.75;30672.15;35749.77;38761.4;34779.21…	0
20140904-PurClathDigest-1ug-01	MULTI	1	324.98553	323.97825	37875.54296875	74	38	2	NaN	0.978254	-0.210776099672842	1.49008	324.986258714139	8.235	36.28	0	656	695		-1		0				NaN	58338	0;31629.24;27234.73;31192.69;34793.72;35170.67;35464.76;36615.11;43675.61;30965.08;34475.58;38909.55;48811.25;57245.66;34073.49;29849.97;34728.79;35134.3;28374.45;42360.03;31556.74;32392.3;38272.29;43286.41;35303.37;46473.25;45165.48;35148.89;38231.64;36749.54;47848.31;35430.48;45548.23;30998.41;32137.14;27282.44;26749.66;3981.387;3836.482;0	0
20140904-PurClathDigest-1ug-01	MULTI	1	325.98432	324.97705	36748.95703125	111	64	2	NaN	0.977045	-0.21244402767843	2.425977	325.986229398348	4.448	43.265	0	362	427		-1		0				NaN	24904	0;4916.769;7014.692;8087.282;11211.28;9718.093;5892.674;7166.087;7824.521;5816.923;7901.074;9384.604;14764.09;12987.89;12189.71;15694.62;16390.46;14074.85;14163.69;16236.64;14665.8;12361.44;10764.05;16536.72;15512.22;11646.76;13673.1;12677.68;17177.57;21659.33;15151.64;13465.67;14522.14;16951.26;13045.53;13842.39;15424.19;21343.96;19123.91;13297.93;16142.3;13139.91;20541.36;13620.15;17944.04;2146…	0
20140904-PurClathDigest-1ug-01	MULTI	1	325.98328	324.976	36748.83984375	98	50	2	NaN	0.976003	-0.213485905663617	2.365572	325.985289319596	6.325	44.905	0	520	571		-1		0				NaN	16748	0;4977.603;9232.619;12267.89;12737.96;12357.96;11039.49;9786.498;12842.39;10442.45;14197.68;13026.67;14430.66;16434.03;12581.16;14852.77;13192.89;13178.12;10438;10251.9;15226.95;11411.89;12465.78;11126.25;14221.04;13014.93;12771.13;13616.26;14881.81;11724.97;13262.46;13935.95;13065.77;14535.39;11948.09;12967.53;14480.25;17010.7;14643.09;11222.4;11420.53;13446.47;10938.34;10768.65;17142.9;13042.36…	0
20140904-PurClathDigest-1ug-01	MULTI	1	324.98525	323.97798	37188.76953125	472	308	3	NaN	0.977977	-0.211052562345401	0.572749	324.986945233668	4.867	227.365	0	261	570		-1		0				NaN	115360	0;34312.85;34622.41;50070.46;43192.53;34139.9;36384.88;32924.82;41176.68;44986;38905.31;42939.11;35754.41;38178.14;42200.99;37167.71;44063.55;35807.47;45160.61;49482.83;55177.34;50728.94;43936.6;41861.64;55605.22;36855.81;37452.88;41335.47;39660.53;34831.5;36565.75;49538.81;41733.4;41561.49;41423.91;48023.77;61700.53;39154.75;43502.45;59379.43;54104.43;45083.29;51650.46;43183.93;46918.61;44022.93…	0
20140904-PurClathDigest-1ug-01	MULTI	1	324.98473	323.97746	37188.7109375	124	70	3	NaN	0.977458	-0.211571160376934	1.24726	324.986176840797	12.387	57.79	0	927	1000		-1		0				NaN	65597	0;30125.96;34308.33;28265.08;36043.69;40087.11;43048.38;44342.23;52037.23;45788.45;37848.91;57064.54;55446.82;46481.5;66567.38;61849.26;52915.43;58886.78;57905.69;44466.86;64688.56;43653.43;33710.51;42811.51;46078.64;49483.01;42637.61;49591.55;54117.14;44010.93;27092.62;52320.43;46959.18;34969.45;48871.18;16407.94;27589.88;39183.23;37997.29;30980.65;35358.69;41556.09;35114.91;33267.45;37523.7;487…	0
20140904-PurClathDigest-1ug-01	MULTI	1	326.96505	325.95778	34853.10546875	13	10	2	NaN	0.957776	-0.232164553105122	3.027817	326.965523130005	13.433	6.81	0	1039	1050		-1		0				NaN	12797	0;4617.456;2850.513;5368.964;12471.96;4924.775;1710.656;2343.77;2732.683;1434.019;2597.969;0	0
20140904-PurClathDigest-1ug-01	MULTI	1	329.32303	328.31575	37714.02734375	4	2	2	NaN	0.315753	0.124727745808002	2.964086	329.322934801666	13.43	1.84	0	1042	1045		-1		0				NaN	71501	0;69683.91;25614.72;0	0
20140904-PurClathDigest-1ug-01	MULTI	1	324.98537	323.9781	37188.78515625	203	114	3	NaN	0.978095	-0.210934639137236	0.811487	324.9865227163	13.857	71.975	0	1036	1151		-1		0				NaN	80891	0;26205.14;21495.09;23013.14;22565.29;31370.35;24650.72;79376.19;34968.96;22826.89;22613.99;22440.46;30335.81;29705.69;26440.32;24510.35;34960.63;29209.83;38637.34;31858.23;45714.64;29233.38;25456.08;28148.61;26218.34;29895.15;29547.54;28965.3;27979.16;45411.25;31890.34;27018.98;33845.82;30931.01;30582.28;28111.17;25613.82;25954.64;25582.71;18549.78;28518.66;24310.74;20967.3;21848.37;54907.97;238…	0
20140904-PurClathDigest-1ug-01	MULTI	4	320.95448	1279.7888	39943.86328125	12	10	2	NaN	0.788798	0.160095539912618	2.058002	321.205392343684	13.802	6.88	0	1075	1086		-1		0				NaN	9673.3	0;3263.234;804.8148;3947.364;3000.14;2678.606;1630.225;1483.609;1336.993;1116.395;0;0	0
20140904-PurClathDigest-1ug-01	MULTI	4	320.95461	1279.7893	NaN	5	3	2	NaN	0.789319	0.160616407361658	2.541122	321.205295339394	14.573	2.52	0	1151	1155		-1		0				NaN	2158.9	0;768.4964;1819.381;1763.781;0	0
20140904-PurClathDigest-1ug-01	MULTI	4	320.95491	1279.7905	NaN	23	18	2	NaN	0.790528	0.161823944724802	1.472637	321.205839732513	14.994	11.82	0	1184	1203		-1		0				NaN	4015.2	0;972.7029;871.5557;747.2018;1518.778;846.4918;1180.823;2415.941;2590.498;2229.684;3280.278;1343.593;1779.548;1724.483;774.2874;1461.013;869.4285;0;0;0	0
20140904-PurClathDigest-1ug-01	MULTI	4	320.95447	1279.7888	37273.5546875	5	3	2	NaN	0.788773	0.16007062969129	3.254442	321.205725158338	15.5	2.485	0	1240	1244		-1		0				NaN	3669.8	0;1005.288;2998.102;2416.795;0	0
20140904-PurClathDigest-1ug-01	MULTI	4	320.95426	1279.7879	37273.53125	13	10	2	NaN	0.787944	0.159241491268858	1.802776	320.954386966988	15.672	7.035	0	1252	1263		-1		0				NaN	3803.6	0;1071.819;969.4292;1396.853;1824.276;2519.012;2804.638;2729.596;2581.228;1754.687;0;0	0
20140904-PurClathDigest-1ug-01	MULTI	1	331.02728	330.02	32261.00390625	10	8	2	NaN	0.02	-0.17180961764393	4.373887	331.029382997228	16.188	8.005	0	1294	1303		-1		0				NaN	1561.5	0;1521.835;1307.934;868.7371;436.3857;498.7248;533.7478;568.7709;0;0	0
20140904-PurClathDigest-1ug-01	MULTI	1	326.96338	325.9561	33531.25	81	53	3	NaN	0.956102	-0.233837680618819	1.224326	326.965464013153	16.124	46.085	0	1265	1319		-1		0				NaN	8216.6	0;2692.094;3974.825;3451.396;3368.476;3862.786;1685.385;714.6939;4574.271;6676.287;4186.433;5044.406;4634.999;4831.526;2878.916;4511.419;2878.31;3933.864;4141.323;3809.25;3950.157;4591.155;6149.744;3341.563;3316.119;5081.667;5595.835;7546.391;8194.637;3899.656;4646.349;3464.521;6620.427;3961.831;4118.489;3510.53;2657.254;4219.781;4059.944;2274.598;4698.339;5574.109;4048.626;5239.394;4123.423;4628…	0
20140904-PurClathDigest-1ug-01	MULTI	1	327.96294	326.95566	33633.7578125	30	24	2	NaN	0.955663	-0.234736289835382	2.502753	327.963761173526	16.375	22.585	0	1300	1325		-1		0				NaN	2084.8	0;328.1782;1650.047;783.7792;993.6873;1422.948;2031.796;763.3301;1062.164;610.9986;623.6259;328.3622;551.2734;668.2836;852.2036;366.1354;413.3232;419.4507;701.7599;882.0666;424.073;596.9311;713.1881;712.5671;0;0	0
20140904-PurClathDigest-1ug-01	MULTI	1	326.98274	325.97546	35520.52734375	26	16	2	NaN	0.975463	-0.214485593629092	2.144832	326.983397219728	16.358	15.46	0	1300	1317		-1		0				NaN	7072.6	0;3225.503;3538.435;5819.975;3756.98;3711.866;4218.661;3631.719;4360.481;4428.681;4431.803;4249.217;5735.072;6002.227;4135.896;3192.755;2631.401;0	0
20140904-PurClathDigest-1ug-01	MULTI	1	330.20632	329.19904	37774.4140625	63	49	2	NaN	0.199044	0.00761219223807075	1.650268	330.206956796966	16.126	44.285	0	1273	1323		-1		0				NaN	2881.5	0;493.3035;1051.461;560.4908;960.6251;595.3751;362.3961;770.1586;533.7752;644.9344;886.7629;1720.843;1712.435;2219.908;2532.79;2430.562;2316.359;2449.032;2227.615;2808.238;1598.223;1283.483;2227.921;1693.358;2328.565;1418.568;1320.027;1475.285;820.012;427.5608;617.9891;507.5973;397.2055;491.9845;586.7635;506.6498;362.5328;558.7197;566.6658;523.0533;551.0479;579.0423;515.5724;508.6916;633.8474;493…	0
20140904-PurClathDigest-1ug-01	MULTI	1	327.97828	326.97101	NaN	12	12	2	NaN	0.971006	-0.219400360439749	3.961266	327.981533431646	16.992	11.9	0	1344	1357		-1		0				NaN	937.37	0;203.2523;335.4953;766.0781;569.9202;960.2521;877.4841;794.7161;537.8558;592.7683;0;0;0;0	0
20140904-PurClathDigest-1ug-01	MULTI	1	330.32455	329.31727	38644.50390625	7	5	2	NaN	0.317273	0.12578713125896	3.401932	330.326456656817	17.164	5.215	0	1360	1366		-1		0				NaN	4367.2	0;4237.93;4256.229;1830.635;627.2236;829.1528;0	0
20140904-PurClathDigest-1ug-01	MULTI	1	326.96376	325.95649	34852.96484375	178	105	3	NaN	0.956485	-0.233454968629985	0.889061	326.965457892789	17.243	97.98	0	1319	1425		-1		0				NaN	8479.4	0;4617.896;3201.543;3626.918;4442.916;3792.242;3465.794;3788.376;5637.783;5191.494;4272.577;5773.694;5189.85;3714.062;5741.324;5006.457;3774.622;3623.2;4083.87;4645.484;3322.321;4031.176;5083.723;2875.962;3843.616;4033.888;4514.441;5271.349;4066.838;7797.094;4616.934;6298.705;5899.501;4193.116;5417.951;8734.086;6518.236;4595.997;5330.305;4886.384;5881.032;7586.435;7937.985;8389.916;6827.665;6108.…	0
20140904-PurClathDigest-1ug-01	MULTI	1	329.32266	328.31538	38448.97265625	15	10	2	NaN	0.315379	0.124354022588193	0.989945	329.322510436885	17.301	9.99	0	1366	1377		-1		0				NaN	16254	0;568.4742;2698.198;5703.208;7515.346;15841.09;9945.311;2467.603;1663.401;2345.521;1973.497;0	0
20140904-PurClathDigest-1ug-01	MULTI	1	324.95368	323.9464	NaN	4	2	2	NaN	0.946402	-0.242613738283296	4.628098	324.955758387762	17.584	2.83	0	1388	1391		-1		0				NaN	1062.3	0;800.9131;1042.365;0	0
20140904-PurClathDigest-1ug-01	MULTI	2	330.70812	659.40169	NaN	7	4	2	NaN	0.40169	0.0583650368812414	4.256803	330.709203714267	17.568	4.71	0	1386	1391		-1		0				NaN	856.83	0;663.5032;547.5698;643.1875;515.0653;0	0
20140904-PurClathDigest-1ug-01	MULTI	1	329.32269	328.31541	39960.4140625	43	32	2	NaN	0.315411	0.124386240148851	0.597812	329.32262885782	17.599	31.1	0	1377	1410		-1		0				NaN	9322.7	0;1316.606;1846.702;2298.177;2480.461;3088.363;9085.729;3959.893;5130.422;2177.848;3611.285;3084.954;3466.518;2983.18;5635.088;2983.383;2342.391;2547.013;1971.355;2813.732;1968.172;1471.161;1428.853;1685.434;1945.06;839.6699;1274.492;1305.636;1176.58;1631.654;846.6948;1720.843;1304.688;0	0
20140904-PurClathDigest-1ug-01	MULTI	1	326.98292	325.97565	35520.546875	46	31	2	NaN	0.975647	-0.21430224828714	1.394005	326.983489161346	17.625	30.14	0	1376	1408		-1		0				NaN	8215.9	0;3652.072;3217.223;2843.964;4018.135;4328.946;5887.841;6714.577;3750.416;4768.4;3887.205;3842;2514.639;4484.04;4078.95;4481.269;4879.941;2139.238;5110.747;3646.382;5570.284;4983.804;4892.078;3978.868;5027.63;2992.198;4375.27;3321.604;4355.543;2810.494;5158.597;3238.454;0	0
20140904-PurClathDigest-1ug-01	MULTI	1	324.94827	323.941	NaN	5	3	2	NaN	0.940998	-0.248015105527884	4.348023	324.946750191816	17.847	3.835	0	1404	1408		-1		0				NaN	862.58	0;368.5251;800.4388;846.4236;0	0
20140904-PurClathDigest-1ug-01	MULTI	1	327.98055	326.97327	NaN	5	4	2	NaN	0.973269	-0.217138630690386	3.808829	327.981136105394	17.926	4.825	0	1408	1413		-1		0				NaN	1286.7	0;164.9269;446.9997;1254.009;531.3391;0	0
20140904-PurClathDigest-1ug-01	MULTI	1	329.32266	328.31538	38370.96875	17	13	2	NaN	0.315379	0.124354389092048	0.701451	329.322491733733	18.004	13.44	0	1410	1424		-1		0				NaN	11072	0;1184.824;1715.299;1032.764;10790.1;6606.396;4152.705;2707.959;3148.481;2020.476;1477.601;1777.806;1530.81;1566.68;0	0
20140904-PurClathDigest-1ug-01	MULTI	4	321.92115	1283.6555	36587.39453125	13	10	2	NaN	0.65549	0.0250087134095338	2.570897	321.920207251476	18.112	10.565	0	1417	1428		-1		0				NaN	2001.1	0;853.6344;901.8854;1035.187;1263.522;1106.211;1634.857;2032.594;1006.162;727.226;1159.95;0	0
20140904-PurClathDigest-1ug-01	MULTI	1	327.96186	326.95458	37058.32421875	18	12	2	NaN	0.954585	-0.235814441768412	4.205116	327.963869077935	18.154	12.49	0	1418	1431		-1		0				NaN	1575.2	0;608.2661;966.2682;513.0575;307.0338;1154.203;1343.168;1010.53;1126.389;1228.524;805.9338;609.3188;970.0107;0	0
20140904-PurClathDigest-1ug-01	MULTI	1	329.32261	328.31533	39165.3203125	13	8	2	NaN	0.315332	0.124307412656947	1.077905	329.322463389256	18.203	8.65	0	1424	1433		-1		0				NaN	6682	0;1422.455;1751.82;3105.245;6512.137;6098.564;4199.994;1938.646;1079.63;0	0
20140904-PurClathDigest-1ug-01	MULTI	1	329.32265	328.31537	38370.96875	19	13	2	NaN	0.31537	0.124345126839444	0.894141	329.322519165593	18.362	13.47	0	1432	1446		-1		0				NaN	8389.8	0;519.3623;2797.43;3373.349;2045.68;8176.548;6489.469;3085.41;1215.293;5402.955;1772.524;868.3795;1223.59;1099.336;0	0
20140904-PurClathDigest-1ug-01	MULTI	1	331.15965	330.15237	36782.54296875	360	199	2	NaN	0.152369	-0.0395006283310977	0.392756	331.159611738094	16.842	179.345	0	1255	1455		-1		0				NaN	58085	0;11948.57;13542.65;9445.136;12254.7;15577.97;11421;11875.34;14509.47;27489.71;9907.114;14612.83;47470.91;28736.61;21554.81;14816.16;13095.67;14746.91;24021;38133.94;22488.95;19236.43;37807.13;30181.94;19714.16;32062.22;17855.59;23601.89;20285.09;22328.66;27389.82;30882.78;35567.04;32370.89;23708.42;27066.12;40961.38;31371.43;33811.09;21808.16;34444.59;25231.9;36082.76;26877.8;24068.62;31435.87;2…	0
20140904-PurClathDigest-1ug-01	MULTI	1	317.24054	316.23327	37483.31640625	65	22	3	NaN	0.233267	0.0477992749948157	0.606217	317.240471604776	12.016	19.28	0	919	942		-1		0				NaN	415590	0;147124.8;231101.5;204160.8;414887.5;276724.8;338931.3;217898.3;262576.1;216945;302612.6;253252.3;289005.3;395397.6;228124.1;334086.5;200418.4;288650.2;288255.7;288701.2;286999.9;161663;154420.2;0	0
20140904-PurClathDigest-1ug-01	MULTI	1	317.2406	316.23333	37483.32421875	230	98	3	NaN	0.233326	0.0478587382727369	0.503138	317.240525482321	9.368	90.41	0	685	784		-1		0				NaN	707870	0;2770.079;2741.749;2624.926;3199.119;2195.781;3434.693;2646.001;3069.991;3412.456;3716.355;4210.109;4922.458;4394.622;4018.215;2687.671;2521.454;1619.186;3540.978;7300.571;35600.47;200100.5;237335.7;171799.9;296764;237582.8;185050.2;141275.3;269061.9;169467.3;187235.9;237044.4;247352.9;222998.1;256443.7;152443;295969.3;310044.6;279214.6;332697.7;247354.9;299865.5;176708.3;318739.1;287717;359949.…	0
20140904-PurClathDigest-1ug-01	MULTI	1	318.24387	317.2366	37541.7421875	59	36	2	NaN	0.236596	0.0506670288164059	0.601931	318.243859721121	11.602	31.05	0	882	919		-1		0				NaN	59030	0;20838.99;52592;24491.02;34021.4;40661.46;35935.52;29349.05;36511.93;30217.26;38290;32600.16;27521.97;31367.14;49962.83;36250.86;36647.78;41621.06;34750.67;48826.67;49240.17;50417.95;32859.55;32859.26;38179.16;27439.33;47790.25;42251.81;29979.03;29292.58;29600.92;28227.27;30993.72;38803.38;57924.07;28550.98;26425.27;0	0
20140904-PurClathDigest-1ug-01	MULTI	1	317.24065	316.23337	37483.328125	93	32	3	NaN	0.233371	0.047903898430377	0.693396	317.240569773531	12.402	26.79	0	941	975		-1		0				NaN	857680	0;527.369;222592.6;221829.3;439023;257139.1;336823.8;249715.3;297589.1;245486.4;270605.4;419538;235584.7;244419.7;218867.5;336213.1;323664.9;512021.7;265120.5;299951.9;359991.1;266970.3;803933.9;856219.6;295497.3;323955.1;298455.1;361170.3;325713.2;388633.8;295693.6;205308.2;235888.9;0	0
20140904-PurClathDigest-1ug-01	MULTI	1	317.24054	316.23327	37483.31640625	227	134	3	NaN	0.233265	0.0477981666073219	0.459526	317.240469411835	10.768	117.44	0	784	919		-1		0				NaN	555660	0;205269.7;222883.3;232493.8;331098.2;347124.9;197462;289870.2;380735.5;274159.6;449544.2;429475.1;432484.6;273571.8;309592.3;361726.7;302343;353628.6;407606;370859.4;179097;353088.7;389021.2;384278.1;413906.8;295333;438322;304090.7;265966.2;328404.3;508374.8;447057.6;256479.9;283979.7;453584.4;349644;554718.6;335952;296230.7;245966.4;287121;239924.5;392960.9;239051.9;357977.5;252405;288814.2;376…	0
20140904-PurClathDigest-1ug-01	MULTI	1	318.24385	317.23658	37541.73828125	110	64	2	NaN	0.236577	0.0506483011571959	0.569559	318.243836820828	10.982	56.395	0	830	895		-1		0				NaN	72656	0;3612.192;1992.403;2319.504;1862.463;1925.811;30013.82;34513.1;39116.64;48494.83;39651.11;71295.42;50978.09;36678.64;47320.38;54223.42;45644.63;47814.04;34403.55;41434.88;47575.6;43578.25;65305.9;48124.63;41596.45;38258.68;39084.63;38704.94;50258.15;42778.61;32458.54;36675.26;37203.78;34982.34;40926.38;31490.02;44495.5;45612.94;37958.01;32713.48;24975.89;37801.08;42871.81;52206.66;35174.01;35061…	0
20140904-PurClathDigest-1ug-01	MULTI	1	317.24072	316.23345	37483.33984375	75	27	3	NaN	0.233446	0.047978950284346	0.74988	317.240656125602	12.803	22.79	0	973	1003		-1		0				NaN	846480	0;1059.498;283129.7;425550.7;276575;441712.5;335846.6;293337.3;395285.6;328660.5;347449.6;829491.3;305238;374615.4;808289;312861;302571.6;739039.9;750764.3;845042.4;298582.8;327974.9;323170.5;305801.8;710938.2;255960.9;308460.6;191500.4;0	0
20140904-PurClathDigest-1ug-01	MULTI	1	317.24078	316.23351	37483.34375	55	19	3	NaN	0.233508	0.0480402877053052	0.875975	317.240711493544	13.076	14.61	0	1001	1021		-1		0				NaN	877550	0;26018.8;42432.16;199471;543934.7;357183.3;743888.9;611039.5;727692.8;816393.6;876059.7;728623.9;233874.5;271432.7;755713.3;763768.4;343117.8;765060.4;200014.9;498773.5;0	0
20140904-PurClathDigest-1ug-01	MULTI	1	317.24046	316.23319	37483.30859375	150	66	3	NaN	0.233188	0.0477208819042403	0.569121	317.240374316099	18.251	63.025	0	1416	1483		-1		0				NaN	579280	0;386025.8;409157.1;478196.9;400699.9;578299.8;454222.4;515532.8;565644.6;507665.6;385146.3;446633.2;297971.1;247439.3;434865.9;490840;518808.3;200121.2;347217.6;273904.2;361340;99516.42;315467.1;349626;363991;137314.2;282765.3;286181.3;253787.5;238732;180779.4;181514.2;131754.4;118270;95282.09;110931.1;95553.69;53696.89;56353.03;15730.35;24641.1;45412.43;22653.37;21620.26;30136.81;24765.69;9273.…	0
20140904-PurClathDigest-1ug-01	MULTI	1	318.24382	317.23654	37541.734375	108	54	2	NaN	0.236542	0.0506132652758424	0.385582	318.243803175728	17.571	51.195	0	1361	1416		-1		0				NaN	98459	0;65189.86;57918.53;62811.71;58771;63946.17;58207.63;79370.05;65645.82;74351.21;34716.7;73388.37;57013.16;80757.57;80212.45;75245.32;81357.22;85576.3;83000.39;73283.99;78150.66;57131.15;34778.19;65718.37;65881.43;76747.3;85727.34;81931.77;96614.81;66608.3;53677.38;60721.16;79855.63;79815.2;87474.89;56089.88;79574.39;75805.04;81934.98;72601.38;63740.36;62783.25;68176.39;78411.86;82568.3;62504.01;8…	0
20140904-PurClathDigest-1ug-01	MULTI	1	317.24046	316.23318	37483.30859375	310	140	3	NaN	0.233184	0.0477165899410466	0.401281	317.240373754522	16.84	128.425	0	1275	1416		-1		0				NaN	839230	0;351366.2;580584.2;470416.4;490353.4;432431.6;416279.8;381091.7;455547.2;517898.1;500861.3;409627.1;569166.8;635709.2;537283.7;612419.6;634020.6;642063.1;298144.1;463619.6;739100.6;452768.5;837799.4;472658.9;493584.9;444608.4;476443.5;570557.9;590090.5;604022.6;344852.9;541412.8;520694.4;580816.7;512720.4;436713.2;435450.4;400638.8;425985.2;643495.3;521671.8;569593.1;733127.4;631709.1;514434.9;4…	0
20140904-PurClathDigest-1ug-01	MULTI	1	317.24105	316.23377	37483.375	502	251	3	NaN	0.23377	0.0483019786548766	0.29961	317.240962884611	14.472	160.535	0	1021	1275		-1		0				NaN	1036200	0;303755.8;762938.8;280789.5;653538.2;781682.8;823686.1;924775.3;862435.3;684087.4;842862.3;925916.9;799434.9;208049.9;897636.9;851405.2;892879.4;856474;768086.6;727943.3;685020.8;548386;755713.4;774605.8;824906.4;788661.4;687718.7;704429.2;863966.3;661711.7;605541.4;619232.8;781716.6;778837.4;809655.9;714367.8;919181.7;805145.8;823606.7;769673.3;793274.3;696141.3;579002.4;678205.3;583748.3;67545…	0
20140904-PurClathDigest-1ug-01	MULTI	1	330.20617	329.1989	37538.3125	94	52	2	NaN	0.198895	0.00746397728971715	1.00375	330.206829646452	18.252	50.925	0	1404	1457		-1		0				NaN	2748.3	0;307.7164;416.8306;438.8889;1379.26;1510.689;2511.522;2939.955;1529.827;1855.853;2163.485;2678.478;2134.686;1400.808;2288.369;1804.033;2658.76;2179.007;2032.547;1524.272;2611.082;1714.076;1419.911;1993.869;2063.248;1958.734;1797.717;2155.188;1593.003;2607.191;2860.862;1833.398;2780.627;2088.009;2269.489;3087.209;2339.739;2733.616;2579.769;2357.64;2903.669;2665.976;2903.48;3000.972;1885.933;2135.…	0
20140904-PurClathDigest-1ug-01	MULTI	1	329.32257	328.31529	39561.8359375	26	21	2	NaN	0.315294	0.124268678561862	0.925581	329.322471851918	18.666	21.15	0	1446	1468		-1		0				NaN	14630	0;1045.55;998.0262;3986.305;1473.117;1045.444;1049.137;1434.486;976.8447;14258.59;5516.618;4560.936;5189.512;4600.818;2286.919;2074.793;3639.173;1532.663;2247.531;2998.205;3671.295;1359.383;0	0
20140904-PurClathDigest-1ug-01	MULTI	1	333.19131	332.18403	36696.96875	490	297	2	NaN	0.18403	-0.00877450403299918	0.402677	333.191235399513	17.125	252.48	0	1209	1507		-1		0				NaN	20255	0;719.9475;1046.876;1258.193;898.7161;971.3571;909.4103;2529.956;2588.633;2614.653;3222.587;2840.696;5099.131;3760.284;3325.578;4099.891;3238.638;3422.397;3315.711;3667.385;5107.747;3479.199;4432.016;4125.69;4041.95;4467.37;5840.628;5436.376;6684.773;5818.509;5402.092;4361.537;5686.579;8725.538;6905.177;7544.697;5500.479;8732.562;7560.324;5903.395;9097.114;7054.829;9021.242;7303.344;9073.889;8085…	0
20140904-PurClathDigest-1ug-01	MULTI	2	321.17139	640.32823	37807.625	193	119	2	NaN	0.328233	-0.00631789019337248	0.484458	321.171295315024	18.253	112.105	0	1368	1488		-1		0				NaN	10066	0;760.3657;733.4279;487.64;1068.794;427.8513;763.9058;1020.726;413.1694;693.6862;813.1271;1231.117;1392.22;1704.142;1024.931;1487.482;1030.812;789.1893;1805.264;1812.283;2077.517;1921.764;2602.334;2623.135;2884.537;2950.174;3441.293;4111.569;3872.889;3388.177;3864.916;3075.643;3746.435;3870.702;4138.197;5732.239;5091.956;4223.127;4621.453;4866.929;3847.343;4398.689;5758.941;5528.041;6868.566;4335…	0
20140904-PurClathDigest-1ug-01	MULTI	1	327.96222	326.95494	35677.23046875	56	39	2	NaN	0.95494	-0.235459432658843	3.029214	327.964035018158	18.669	38.175	0	1433	1473		-1		0				NaN	2337.4	0;243.8911;788.5005;1427.913;446.1227;679.2084;644.7972;519.9849;1118.514;1004.86;805.7725;487.6763;438.1859;692.3969;834.3029;1206.161;366.1001;680.6611;1342.802;1387.827;1288.021;1817.897;1177.233;1810;1213.047;1193.945;1544.161;1094.111;1035.365;2244.974;1847.777;1746.285;1760.596;2082.639;1746.021;1576.113;1743.066;1199.523;0;0;0	0
20140904-PurClathDigest-1ug-01	MULTI	1	327.96619	326.95891	52141.5859375	24	18	2	NaN	0.958909	-0.231491620374698	4.186362	327.964346351318	19.03	15.685	0	1473	1492		-1		0				NaN	2097.3	0;1094.026;1804.224;1540.307;1554.18;1338.845;793.7124;2071.744;1442.759;690.2933;1469.206;1255.946;1203.658;1151.369;1714.014;676.2843;590.6351;0;0;0	0
20140904-PurClathDigest-1ug-01	MULTI	1	324.98504	323.97777	37188.74609375	260	121	3	NaN	0.977768	-0.211262227695102	1.084856	324.986418895832	19.027	103.81	0	1422	1544		-1		0				NaN	82614	0;22441.86;22964.75;32778.11;28053.64;26270.41;24844.11;41414.2;25836.45;23321.05;29981.79;28177.73;34579.98;26707.1;45399.68;53126.63;35086.45;31660.61;33794.73;38916.88;33252.49;33843.18;32594.88;35848.74;33700.93;39219.29;67398.69;42802.12;40205.15;33143.03;42207.17;42941.54;49620.09;47613.41;47673.2;46270.82;45704.7;44302.97;42254.37;41784.93;44732.81;39771.68;48575.36;51240.89;43247.25;40638…	0
20140904-PurClathDigest-1ug-01	MULTI	1	324.96064	323.95337	31893.185546875	6	4	2	NaN	0.953367	-0.235651818317763	3.202298	324.962132045845	19.632	3.675	0	1526	1531		-1		0				NaN	2208.3	0;1757.197;1962.07;2166.943;0;0	0
20140904-PurClathDigest-1ug-01	MULTI	1	326.96528	325.958	35868.92578125	160	116	2	NaN	0.958	-0.2319406643403	0.695335	326.966001527784	19.145	99.41	0	1425	1542		-1		0				NaN	12416	0;2852.816;2648.483;3160.484;4789.354;2699.356;3126.789;3686.862;4637.896;4290.941;3457.486;4135.655;5684.816;4409.965;4284.891;3694.64;3784.271;4008.215;4749.675;4000.95;4001.315;3944.999;5624.638;6046.763;5536.656;3939.785;4684.472;4232.052;4367.486;5866.734;5407.119;4709.158;5788.013;5240.43;4898.006;5269.121;4681.322;4818.283;4448.152;4090.388;4903.282;5344.703;4437.233;5994.592;4367.196;4626…	0
20140904-PurClathDigest-1ug-01	MULTI	1	326.96576	325.95849	37093.7734375	112	78	2	NaN	0.958485	-0.231455783715717	0.839961	326.966626552121	20.203	59.511	0	1539	1632		-1		0				NaN	13636	0;4694.248;4774.313;7179.355;6748.769;8700.297;6123.936;6391.688;5614.007;7793.193;6103.709;9255.574;7678.024;7163.011;6692.387;7274.297;8868.915;8743.099;7450.278;8118.144;5398.168;7398.595;9440.192;7858.971;9549.477;6487.239;5463.908;8047.119;6654.318;9506.278;9645.217;5412.292;6594.168;6950.225;8738.431;9015.238;6782.703;5700.99;5300.008;9956.159;5587.168;7704.052;5956.313;5804.606;5108.259;11…	0
20140904-PurClathDigest-1ug-01	MULTI	1	317.24153	316.23425	36874.421875	16	8	3	NaN	0.23425	0.0487827088510926	0.988637	317.241446926674	20.683	14.36	0	1611	1640		-1		0				NaN	540810	0;9425.612;13843.55;13254.03;8828.766;298036.4;539888.9;307168.8;8212.897;0	0
20140904-PurClathDigest-1ug-01	MULTI	4	326.19143	1300.7366	38013.11328125	10	4	3	NaN	0.73661	0.0982715503414511	1.192103	326.191371753688	20.717	11.21	0	1616	1640		-1		0				NaN	14325	0;2175.967;6848.334;13618.53;5714.837;0	0
20140904-PurClathDigest-1ug-01	MULTI	1	331.16059	330.15331	36404.7421875	6	3	2	NaN	0.153312	-0.0385588775616839	0.981806	331.160543093116	20.681	7.396	0	1616	1632		-1		0				NaN	40679	0;22537.26;39644.51;11756.07;0	0
20140904-PurClathDigest-1ug-01	MULTI	3	323.18282	966.52662	36804.1796875	7	6	2	NaN	0.526618	0.0420154778040569	1.992149	323.182696933486	20.724	12.781	0	1613	1640		-1		0				NaN	7729.1	0;592.3193;818.6171;1044.915;1692.972;6838.465;696.3101;0	0
20140904-PurClathDigest-1ug-01	MULTI	3	323.50245	967.48551	36344.63671875	8	5	2	NaN	0.485509	0.000465876118482811	2.338137	323.502167987324	20.727	15.055	0	1616	1648		-1		0				NaN	28709	0;572.7465;3010.551;25400.74;5494.739;1010.109;0	0
20140904-PurClathDigest-1ug-01	MULTI	2	332.6746	663.33465	33432.38671875	6	4	2	NaN	0.334653	-0.0104811959960216	3.116145	332.674260626781	20.793	13.85	0	1618	1648		-1		0				NaN	19506	0;733.6924;717.5776;18240.24;7647.167;0	0
20140904-PurClathDigest-1ug-01	MULTI	2	320.20077	638.38698	NaN	8	6	2	NaN	0.38698	0.0533217692913013	1.783729	320.20078741331	20.951	25.705	0	1624	1678		-1		0				NaN	10092	0;734.9067;1923.672;5789.638;9437.35;1841.676;1100.26;0	0
20140904-PurClathDigest-1ug-01	MULTI	2	321.17213	640.32971	36796.57421875	217	163	4	NaN	0.329706	-0.00484568538377061	1.304686	321.172167521129	20.843	147.265	0	1532	1775		-1		0				NaN	3388300	0;573.9683;1404.59;2594.961;3133.669;1772.3;1674.731;1161.696;1558.411;1294.85;2954.521;2629.733;1526.173;1701.068;2299.527;1737.665;2701.046;2873.086;1939.063;3599.818;2918.127;2474.418;2795.222;1854.657;798.0633;1792.912;3366.096;3125.097;2941;2575.274;1066.467;2408.273;2074.392;2693.268;4274.06;2744.914;3610.661;2978.871;4020.508;3900.496;3968.415;4825.178;7966.723;5251.306;6947.205;7054.104;1…	1	1610	0	0
20140904-PurClathDigest-1ug-01	MULTI	2	328.71358	655.4126	38583.1875	16	11	2	NaN	0.412601	0.0711115829659548	1.537464	328.713793860855	21.198	22.175	0	1656	1695		-1		0				NaN	7890.5	0;3804.699;1033.217;6239.408;4598.757;4253.25;6326.738;4596.621;3518.667;5458.218;2100.564;1421.132;0	0
20140904-PurClathDigest-1ug-01	MULTI	2	319.65941	637.30428	37444.734375	51	36	2	NaN	0.304276	-0.0288841036862095	0.590162	319.659392856028	21.152	55.8	0	1618	1721		-1		0				NaN	92229	0;970.1269;2133.263;5019.965;10053.86;25548.59;34864.66;60250.6;86244.27;77921.27;62260.33;63150.71;60264.39;35106.04;17457.08;19542.87;12129.36;11123.15;11168.27;6569.928;3439.55;4934.936;5132.449;1295.459;4769.187;3684.062;2598.937;994.9952;1717.42;2632.48;1346.892;1371.044;1461.26;609.7728;954.0511;1435.224;0;0	1	1669	0	0
20140904-PurClathDigest-1ug-01	MULTI	4	327.91655	1307.6371	33944.359375	8	7	2	NaN	0.637083	-0.00443004056614882	2.691142	327.916334605169	21.331	7.969	0	1688	1701		-1		0				NaN	7479.6	0;950.627;1442.815;1935.004;1503.78;6110.571;2043.833;0;0	0
20140904-PurClathDigest-1ug-01	MULTI	4	323.41422	1289.6278	NaN	8	6	2	NaN	0.627788	-0.00544055839009161	2.317668	323.665205849222	21.402	4.955	0	1700	1708		-1		0				NaN	4496.3	0;1221.056;1674.087;3673.353;2612.008;1743.946;1086.143;0	0
20140904-PurClathDigest-1ug-01	MULTI	3	327.85804	980.55229	36388.22265625	57	33	2	NaN	0.552287	0.0612328307418011	0.667198	327.858011214136	21.318	39.895	0	1656	1724		-1		0				NaN	12163	0;1604.051;10408.82;10681.86;10426.34;9902.82;5896.231;9875.072;9934.492;10573.65;16975.73;11892.37;7967.869;10935.09;9303.303;11189.56;8321.81;5147.356;4729.342;8061.646;8752.916;4111.105;5961.38;3709.481;5635.015;3536.574;6051.97;2616.935;2182.762;1748.589;1124.13;835.2421;1597.119;0;0	0
20140904-PurClathDigest-1ug-01	MULTI	4	332.41907	1325.6472	37014.76171875	94	63	3	NaN	0.647163	-0.0026349943761943	0.599902	332.419164491168	21.507	62.885	0	1656	1762		-1		0				NaN	21346	0;2543.516;2852.571;4989.435;3516.349;4355.44;3997.994;6862.236;5211.94;7516.584;4245.132;9911.668;9701.899;13090.35;11465.16;13326.62;13294.89;9116.958;12550.66;14160.51;8586.559;11353.73;14570.35;14352.15;11917.46;12835.86;13624.15;10515.97;19731.98;15211.91;11695.36;7779.193;9907.835;5611.387;4274.021;5779.078;9474.046;4082.724;7606.335;5871.667;3883.064;7431.083;5780.016;6853.243;6011.876;462…	0
20140904-PurClathDigest-1ug-01	MULTI	2	332.18254	662.35052	34198.91796875	99	76	2	NaN	0.350522	0.00584088335449451	0.802227	332.182536248157	21.533	78.615	0	1640	1775		-1		0				NaN	14671	0;6586.039;6782.827;6524.744;10035.93;5308.357;6430.879;7294.274;10148.77;8563.319;6305.147;9862.187;6994.987;7724.776;9111.761;11063.2;10512.66;8506.039;6910.939;8337.079;7798.915;8485.254;6053.717;6642.668;8594.266;7781.049;7698.549;8778.513;8348.989;7791.098;7944.058;7276.261;4555.098;9108.308;7797.491;4078.408;4814.799;4326.234;4178.031;4790.182;3330.837;5535.915;5698.759;6025.815;6997.993;52…	0
20140904-PurClathDigest-1ug-01	MULTI	3	321.49338	961.4583	36634.36328125	8	6	2	NaN	0.458302	-0.0239687236799	2.909984	321.493676763276	21.684	4.62	0	1728	1736		-1		0				NaN	4733.1	0;1456.672;4016.222;3897.674;2618.042;2771.244;2347.297;0	0
20140904-PurClathDigest-1ug-01	MULTI	2	330.20829	658.40202	37148.90625	164	135	2	NaN	0.402024	0.0591586666375861	0.575043	330.208242639211	21.649	121.264	0	1624	1833		-1		0				NaN	20187	0;3745.462;4935.95;12666.46;7931.947;12697.46;19486.09;18287.51;18083.48;16138.21;17046.83;21077.59;14003.44;16140.31;17068.63;18378.66;18129.34;18877;13211.96;14946.99;17992.17;17114.85;13737.46;9949.473;17928.57;14503.74;15820.77;10339.64;12020.14;13502.57;12711.93;7292.864;7136.991;8398.672;10119.67;9300.652;8128.813;6785.701;7837.476;8473.24;8323.839;8578.466;7998.936;6282.563;10048.11;8825.9…	0
20140904-PurClathDigest-1ug-01	MULTI	4	332.41926	1325.6479	38418.13671875	24	16	2	NaN	0.64794	-0.00185855180347971	1.285796	332.419549993208	22.257	11.045	0	1779	1797		-1		0				NaN	12489	0;1925.39;5529.349;1403.809;6002.283;5204.774;3278.251;5904.241;3923.396;4987.946;5657.766;2067.802;2468.074;3390;3492.943;0;0;0	0
20140904-PurClathDigest-1ug-01	MULTI	1	327.98036	326.97308	NaN	10	7	2	NaN	0.973083	-0.217324187024246	3.515586	327.983349484682	22.603	4.94	0	1817	1825		-1		0				NaN	1753.4	0;1473.572;1577.018;2301.631;2573.29;1291.757;595.3268;0;0	0
20140904-PurClathDigest-1ug-01	MULTI	4	328.71431	1310.8281	32036.763671875	9	7	2	NaN	0.828128	0.1851474784728	1.9329	328.964798707348	22.788	5.91	0	1833	1843		-1		0				NaN	3481.4	0;666.051;615.4423;1321.258;1816.419;2844.201;1027.593;0;0	0
20140904-PurClathDigest-1ug-01	MULTI	1	324.95821	323.95093	29424.02734375	8	6	2	NaN	0.950931	-0.238086623445042	4.617389	324.962447442611	22.844	5.02	0	1840	1848		-1		0				NaN	6386.8	0;1173.712;702.9271;6267.117;1875.286;2842.328;404.1548;0	0
20140904-PurClathDigest-1ug-01	MULTI	1	327.98231	326.97503	NaN	8	8	2	NaN	0.975035	-0.21537397531614	2.226204	327.982618736987	23.188	5.745	0	1872	1881		-1		0				NaN	2436	0;897.1196;819.5746;742.0297;642.7051;2374.096;1719.476;0;0;0	0
20140904-PurClathDigest-1ug-01	MULTI	1	324.96051	323.95323	NaN	7	5	2	NaN	0.953232	-0.235786704178906	4.283601	324.964114327579	23.301	4.945	0	1884	1892		-1		0				NaN	3157.7	0;2672.707;3972.662;2046.881;2166.477;1464.702;0	0
20140904-PurClathDigest-1ug-01	MULTI	6	332.12752	1986.7214	NaN	4	2	2	NaN	0.721444	-0.232447880452582	3.621799	332.294295527948	23.341	2.5	0	1889	1893		-1		0				NaN	2263.5	0;1181.537;1451.015;0	0
20140904-PurClathDigest-1ug-01	MULTI	1	326.98424	325.97696	35520.69140625	15	10	2	NaN	0.976963	-0.212986051489224	2.84527	326.98479274625	23.518	7.685	0	1902	1914		-1		0				NaN	11945	0;5228.472;5471.533;8005.88;11640.97;7400.089;6849.417;8184.402;8734.988;3461.399;2430.44;0	0
20140904-PurClathDigest-1ug-01	MULTI	1	325.95083	324.94355	NaN	4	2	2	NaN	0.943554	-0.245919911252713	2.455724	325.950573342928	23.66	1.97	0	1920	1923		-1		0				NaN	2096.1	0;2056.868;1416.61;0	0
20140904-PurClathDigest-1ug-01	MULTI	1	324.95391	323.94664	31831.4296875	6	5	2	NaN	0.946638	-0.242377347149613	3.831508	324.951784021074	24.092	3.96	0	1959	1965		-1		0				NaN	4378.5	0;1222.778;4296.498;2030.863;1354.93;0;0	0
20140904-PurClathDigest-1ug-01	MULTI	1	327.96452	326.95724	NaN	8	6	2	NaN	0.957239	-0.233161066708817	3.696117	327.965110517987	24.394	5.735	0	1984	1993		-1		0				NaN	3113.8	0;1175.138;1198.144;2116.406;2488.958;1436.287;0;0	0
20140904-PurClathDigest-1ug-01	MULTI	1	327.96537	326.95809	36349.79296875	5	3	2	NaN	0.958093	-0.232307622477379	3.536176	327.965801896968	24.461	2.68	0	1994	1998		-1		0				NaN	3256	0;3173.262;1692.168;874.2645;0	0
20140904-PurClathDigest-1ug-01	MULTI	1	324.96048	323.95321	NaN	9	6	2	NaN	0.953207	-0.235811636355322	3.211488	324.962986543782	24.508	4.62	0	1997	2004		-1		0				NaN	2384.9	0;1472.864;2340.212;2239.333;1931.291;734.0285;0;0	0
20140904-PurClathDigest-1ug-01	MULTI	1	327.96327	326.956	NaN	6	5	2	NaN	0.955999	-0.234401233901508	3.872085	327.96486849647	24.598	4.07	0	2004	2010		-1		0				NaN	2154.3	0;838.4795;533.7209;514.5221;2099.546;1254.089;0	0
20140904-PurClathDigest-1ug-01	MULTI	1	324.95663	323.94935	32555.64453125	5	3	2	NaN	0.949351	-0.239665390228936	4.260263	324.956085793946	24.791	2.795	0	2023	2027		-1		0				NaN	3942.3	0;1751.865;2661.732;3336.832;0	0
20140904-PurClathDigest-1ug-01	MULTI	3	322.84553	965.51477	36960.09765625	4	2	2	NaN	0.514773	0.0306365277918985	3.038847	322.84575095277	24.876	3.425	0	2030	2035		-1		0				NaN	2858.5	0;1420.479;2529.086;0	0
20140904-PurClathDigest-1ug-01	MULTI	3	322.84636	965.51725	36960.19140625	14	9	2	NaN	0.517251	0.03311312420999	2.20236	322.84622418151	24.991	6.895	0	2038	2048		-1		0				NaN	2260	0;540.6925;524.3627;2478.196;1999.618;1872.089;2596.508;1493.973;1890.357;0;0	0
20140904-PurClathDigest-1ug-01	MULTI	1	324.96401	323.95673	NaN	6	5	2	NaN	0.956731	-0.232289127049285	4.356362	324.964514688942	25.141	3.92	0	2054	2060		-1		0				NaN	1681.8	0;1126.227;1311.304;1423.535;1296.734;0;0	0
20140904-PurClathDigest-1ug-01	MULTI	1	329.3239	328.31662	37351.84375	5	3	2	NaN	0.316619	0.125593611742147	1.847268	329.323832382214	25.179	2.535	0	2058	2062		-1		0				NaN	6141.3	0;4493.274;5347.543;5985.237;0	0
20140904-PurClathDigest-1ug-01	MULTI	1	326.98431	325.97703	35520.6953125	15	11	2	NaN	0.977029	-0.212920545753605	3.025292	326.984920747038	25.717	8.795	0	2102	2115		-1		0				NaN	10228	0;3068.552;3809.459;4570.12;6092.981;8152.133;7091.464;9967.678;5132.743;4435.376;6785.077;2754.401;0	0
20140904-PurClathDigest-1ug-01	MULTI	1	324.95973	323.95245	NaN	5	3	2	NaN	0.952449	-0.236569183881159	3.027908	324.960018615903	25.778	2.77	0	2112	2116		-1		0				NaN	1598.4	0;1352.919;2060.375;1735.183;0	0
20140904-PurClathDigest-1ug-01	MULTI	1	324.95344	323.94617	45743.125	6	5	2	NaN	0.946168	-0.242847185730909	3.73857	324.955288095508	26.218	4.525	0	2152	2159		-1		0				NaN	2491.9	0;2401.763;2445.243;965.6189;989.829;0;0	0
20140904-PurClathDigest-1ug-01	MULTI	1	324.95532	323.94805	23591.90625	7	4	2	NaN	0.948047	-0.240969564759666	3.952872	324.952501797315	26.362	4.14	0	2165	2172		-1		0				NaN	4007.4	0;3616.854;1632.411;3932.325;2287.753;0	0
20140904-PurClathDigest-1ug-01	MULTI	1	324.95205	323.94478	32645.435546875	7	5	2	NaN	0.944778	-0.244236440443046	5.019585	324.948650320582	26.439	4.855	0	2170	2177		-1		0				NaN	4090.2	0;855.7826;1243.04;3022.05;3533.731;0;0	0
20140904-PurClathDigest-1ug-01	MULTI	1	327.98209	326.97481	NaN	5	3	2	NaN	0.974811	-0.215597076922279	3.778586	327.982747817168	26.553	2.57	0	2183	2187		-1		0				NaN	2439.5	0;1404.443;2377.468;1952.838;0	0
20140904-PurClathDigest-1ug-01	MULTI	1	325.98307	324.9758	36986.02734375	74	48	2	NaN	0.975795	-0.213693795788288	2.897231	325.985478198951	14.353	30.79	0	1104	1153		-1		0				NaN	7080.4	0;906.3247;1984.735;4726.064;3551.847;2839.495;4696.671;3147.242;1169.086;4511.95;2175.081;3837.792;2803.144;5066.592;5992.997;3032.987;2331.038;5061.356;5559.566;2421.285;2840.017;5093.069;9016.747;3509.729;4899.377;5615.515;7190.811;6649.686;7442.455;7231.715;4999.805;6525.6;5517.422;5959.953;4179.961;11620.93;6129.968;6564.74;3203.28;5485.851;5765.92;4612.509;4644.566;4268.882;3829.262;7754.64…	0
20140904-PurClathDigest-1ug-01	MULTI	1	325.98357	324.97629	36986.08203125	38	20	2	NaN	0.976292	-0.213197481037639	3.824922	325.985484661966	14.667	13.22	0	1151	1172		-1		0				NaN	9593.8	0;1519.783;3025.358;2892.898;6711.747;3109.228;6486.341;5394.724;9414.036;5978.894;4683.599;4859.063;5975.936;6747.076;7443.195;7978.263;5014.222;7933.75;4490.802;6236.339;3864.946;0	0
20140904-PurClathDigest-1ug-01	MULTI	1	325.9833	324.97602	36986.05078125	68	37	2	NaN	0.976021	-0.213468443787008	2.957744	325.985386827087	15.364	23.81	0	1209	1247		-1		0				NaN	11766	0;2866.246;2292.341;2776.247;2342.871;5724.049;5841.359;3067.282;4275.282;5475.49;3802.367;11545.87;9744.941;7249.31;4797.413;6063.729;4002.203;11818.16;6392.856;5324.233;4173.553;7718.848;6756.947;8179.056;6179.14;6838.561;7356.612;7598.93;7274.589;8813.023;7299.188;4937.643;11251.82;5484.061;5501.971;5564.934;2562.367;1974.246;0	0
20140904-PurClathDigest-1ug-01	MULTI	1	324.98449	323.97721	37188.68359375	86	54	3	NaN	0.977214	-0.211815417444882	3.438157	324.986001405813	16.061	41.66	0	1245	1300		-1		0				NaN	55296	0;2232.15;2961.269;2644.217;5040.729;3538.791;4701.385;2309.164;2953.104;3168.721;4831.994;3357.76;2421.847;2992.25;4883.082;4710.55;2648.747;3093.479;3500.094;3455.861;2814.145;3065.719;6727.298;4201.336;5069.813;2083.059;3608.758;3166.887;4525.095;5506.266;4300.292;5048.118;4807.544;4378.858;4023.716;3741.387;3725.75;4246.045;7323.73;23337.62;25822.82;28741.33;46910.02;31513.75;26653.88;37843.6…	0
20140904-PurClathDigest-1ug-01	MULTI	1	325.98292	324.97564	36986.0078125	142	104	2	NaN	0.975643	-0.213845726092529	1.682442	325.984980160262	17.057	96.04	0	1299	1404		-1		0				NaN	15921	0;3673.245;3157.44;5329.364;4976.312;3848.444;4260.766;6214.396;3858.994;6411.126;4149.807;5206.677;4042.487;4935.655;7558.069;5821.49;3507.674;3628.828;3788.009;3441.89;4192.852;4745.377;4072.398;5988.654;5691.131;3329.732;3714.414;4336.354;6508.473;7612.894;5093.413;4811.023;5226.843;4439.301;5458.375;3189.536;3568.508;4025.44;4666.881;7367.707;7796.869;7856.729;10543.65;8091.386;6060.403;7358.…	0
20140904-PurClathDigest-1ug-01	MULTI	1	325.98362	324.97634	36986.0859375	95	69	2	NaN	0.97634	-0.213149530855901	2.590485	325.985716565781	19.54	53.64	0	1478	1548		-1		0				NaN	24083	0;4793.63;4794.117;4707.14;6903.149;4118.859;8359.444;5767.464;5857.981;9131.104;5323.373;6673.24;6212.212;1795.944;4563.431;6265.673;5644.41;5429.751;4774.414;4975.856;4256.397;5773.839;12297.08;7958.933;9630.317;7556.25;8748.227;8527.208;8653.621;10305.69;6112.792;3584.17;7195.516;7267.927;4629.49;4940.097;5341.242;6111.099;4643.82;13510.71;12592.25;18708.24;18277.94;23631.61;14761.7;9526.748;1…	0
20140904-PurClathDigest-1ug-01	MULTI	1	324.98563	323.97835	37188.8125	201	74	3	NaN	0.978353	-0.210677488607075	1.613714	324.987114842035	20.244	56.431	0	1543	1632		-1		0				NaN	95697	0;11913.69;41831.91;38892.78;45146.98;48940.6;45743.32;45972.72;53914.48;47694.7;63421.38;65946.78;60577.05;64018.29;46763.88;57618.48;48770.46;58008.87;84811.48;78179.33;54527.81;55513.81;50468.29;68210.94;69196.33;64261.9;58627.18;47011.84;52911.41;53933.46;58381.76;57549.82;46357.13;48977.05;54748.11;75406.23;56596.98;61802.52;63644.88;45515.18;95534.73;75307.23;68148.34;64023.96;75620.66;5452…	0
20140904-PurClathDigest-1ug-01	MULTI	1	325.98465	324.97737	36986.203125	142	91	2	NaN	0.977373	-0.212116198316892	1.943769	325.986460512164	24.078	65.145	0	1913	2013		-1		0				NaN	23336	0;6682.494;9836.808;5501.136;8841.424;7642.676;6440.946;5880.763;6522.891;10161.02;9947.206;8905.938;10305.64;8243.151;7961.756;8112.606;10379.1;14230.67;18725.02;15015.38;18808.96;14314.92;15653.82;16308.4;16976.93;11846.56;15629.84;17492.7;15558.19;14112.03;17918.63;15742.86;15225.63;17857.1;22898.68;18460.23;19830;16029.44;16840.19;16637.8;8287.236;16031.57;15167.38;13919.99;7716.997;16100.42;…	0
20140904-PurClathDigest-1ug-01	MULTI	1	324.98592	323.97864	37188.84765625	584	303	3	NaN	0.978644	-0.210386553231444	0.567619	324.987465040687	22.8	235.359	0	1632	2015		-1		0				NaN	89513	0;30897.64;54473.09;38310.14;36878.72;41419.94;41903.48;46842.06;42924.54;40062.61;41293.61;45075.73;39506.78;58172.63;36746.16;46748.38;53599.1;41472.96;45908.08;51977.9;46997.33;50898.67;46620.8;45569.91;39130.48;49785.34;46027.39;50080.51;48260.9;51480.95;46417.9;49584.92;44996.29;56214.74;53814.17;58676.55;58411.58;43548.29;41219.5;41794.37;48468.88;56203.75;54935.66;48245.79;58324.62;57397.3…	0
20140904-PurClathDigest-1ug-01	MULTI	1	324.98595	323.97867	37188.84765625	299	141	3	NaN	0.978671	-0.210359257783807	0.855701	324.987468137394	25.553	105.89	0	2015	2175		-1		0				NaN	85432	0;27076.39;30833.43;61900.64;42282.69;32988.29;32551.05;41021.54;39712.41;39176.71;50655.41;63240.25;47084.29;35609.79;31164.38;36900.63;37236.43;33155.46;40887.04;33316.41;37686.63;44632.35;40542.26;35752.27;31235.18;33934.08;37151.43;38850.26;34599.19;47311.36;49732.2;42170.94;49874.83;52490.72;44780.21;49220;64660.19;58955.42;70236.97;74507.37;85287.03;74500.22;52620.42;72959.16;66411.2;56674.…	0
20140904-PurClathDigest-1ug-01	MULTI	1	325.98467	324.97739	36986.20703125	76	47	2	NaN	0.977393	-0.212096949428826	2.797946	325.98640416042	24.817	35.47	0	1996	2049		-1		0				NaN	23144	0;3857.348;5742.833;3470.769;6008.594;5443.372;8049.185;7033.112;4593.685;1854.035;5252.621;2856.355;7200.837;5732.662;4418.125;5910.798;5436.002;3990.456;7718.383;9573.49;12475.16;14360.59;18941.15;13765.93;12910.6;10395.97;14225.65;13259.47;13578.14;14204.57;22710.71;16914.08;13230.43;10653.21;9773.119;14656.82;10800.23;13306.83;10360.14;10361.06;15381.98;15136.39;9642.016;12964.62;13762.29;104…	0
20140904-PurClathDigest-1ug-01	MULTI	1	324.95598	323.9487	NaN	8	6	2	NaN	0.9487	-0.240316749441888	4.277013	324.958431536014	27.082	4.505	0	2231	2238		-1		0				NaN	3117.8	0;884.2571;1522.631;3197.161;3490.588;1680.587;0;0	0
20140904-PurClathDigest-1ug-01	MULTI	5	326.94484	1629.6878	NaN	4	2	2	NaN	0.687826	-0.101830511433946	3.990569	327.145829974205	28.276	2.175	0	2349	2352		-1		0				NaN	3077.1	0;2191.001;1952.97;0	0
20140904-PurClathDigest-1ug-01	MULTI	1	327.98388	326.9766	NaN	4	2	2	NaN	0.976599	-0.213809812506952	4.35129	327.984718143485	29.415	2.285	0	2458	2461		-1		0				NaN	1700.6	0;1310.008;1657.384;0	0
20140904-PurClathDigest-1ug-01	MULTI	4	327.67354	1306.6651	36717.5078125	131	93	2	NaN	0.665055	0.0239894767448732	0.606188	327.673527893164	29.315	66.27	0	2410	2513		-1		0				NaN	19361	0;7898.702;6761.168;7595.307;7112.766;12232.05;6001.753;6205.187;13178.38;14358.24;10106.67;15114.28;8773.369;11455.16;12963.71;8649.34;13516.95;15125.46;15965.73;8995.566;8292.131;9571.842;13132.84;10024.41;12529.66;10540.35;8722.879;12618.18;8119.536;12491.63;11784.04;14552.62;12146.11;14678.3;13633.21;14288.51;15817.22;9606.619;9034.342;10933.36;10713.58;10799.46;11528.84;8772.935;9049.056;821…	0
20140904-PurClathDigest-1ug-01	MULTI	1	326.98487	325.97759	34120.3125	19	14	2	NaN	0.977592	-0.212357677857653	2.499327	326.985397531837	29.568	10.305	0	2465	2481		-1		0				NaN	12532	0;3453.207;4683.23;2825.026;5840.825;4980.254;9486.941;8104.144;11105.56;7622.419;8511.212;6594.593;4272.315;6052.335;4156.974;0	0
20140904-PurClathDigest-1ug-01	MULTI	4	323.16625	1288.6359	39528.27734375	25	19	2	NaN	0.635908	0.00313526098648254	1.814122	323.165893226822	29.64	14.1	0	2470	2492		-1		0				NaN	7848	0;996.0523;2086.495;2160.922;673.3471;2613.475;4265.07;4180.132;5604.077;2979.819;1359.076;3382.261;2286.129;2228.244;2717.998;1354.521;967.6005;2050.916;1503.012;0;0	0
20140904-PurClathDigest-1ug-01	MULTI	3	322.8466	965.51797	36547.8828125	71	46	2	NaN	0.51797	0.0338320309418805	0.656427	322.846527716283	25.561	34.885	0	2066	2118		-1		0				NaN	9623	0;2992.15;1088.178;1512.432;1773.973;1757.83;1845.495;1066.922;2420.814;1539.195;1142.727;608.0082;4583.919;5586.625;6264.479;7744.001;6846.271;6040.652;6556.077;9321.648;6071.904;7463.436;6906.888;8816.731;6111.895;9183.518;7841.189;8583.526;6510.03;7921.796;7870.471;9309.235;10007.86;8514.16;8631.266;8811.669;5649.518;5405.584;3703.387;2314.288;1897.83;1481.373;3359.427;2205.945;1726.107;1054.0…	0
20140904-PurClathDigest-1ug-01	MULTI	3	322.84683	965.51865	36547.91015625	586	340	2	NaN	0.518651	0.0345126258271193	0.317127	322.846801457503	27.907	245.855	0	2108	2496		-1		0				NaN	59391	0;6433.913;4441.369;4557.157;4296.091;5254.117;5843.768;5518.917;5138.831;4793.975;6739.478;4492.844;6711.436;6001.629;7129.708;7593.786;8177.65;4383.504;7723.616;7847.431;8366.88;8670.348;5178.511;6498.18;7199.65;6593.284;5238.282;6426.855;5614.677;8266.077;8124.05;9253.901;6768.268;10026.5;7331.99;7302.762;9707.152;8129.935;11671.72;10883.98;6487.985;7280.557;9996.473;9776.367;11823.35;9363.351…	0
20140904-PurClathDigest-1ug-01	MULTI	3	321.49334	961.45818	36707.453125	1286	693	2	NaN	0.458182	-0.0240890200034301	0.157121	321.493340328923	26.493	493.97	0	1734	2509		-1		0				NaN	173790	0;1669.729;2337.739;2322.237;2922.376;1420.684;1610.719;1737.228;3261.103;4705.434;1385.281;3477.002;2375.107;1913.456;4228.173;1495.756;6215.122;5066.242;2038.9;3857.631;1633.158;4157.675;8468.419;2122.611;4375.824;2232.522;3262.957;2852.77;7143.272;5003.842;3033.719;4474.655;4010.166;2974.121;4993.176;4770.135;7884.538;5372.124;5436.727;6235.86;6625.939;8169.889;7363.804;8461.825;7066.014;8285.…	13	1842;1890;1938;1985;2031;2077;2122;2169;2218;2267;2316;2365;2414	0;0;0;0;0;0;0;0;0;0;0;0;0	0;0;0;0;0;0;0;0;0;0;0;0;0
20140904-PurClathDigest-1ug-01	MULTI	1	326.98377	325.9765	33273.59375	40	28	3	NaN	0.976498	-0.213450995492792	1.739964	326.985220260347	29.826	20.62	0	2481	2513		-1		0				NaN	12370	0;6595.005;2881.686;5186.966;7678.826;6274.974;6142.095;2821.712;2353.387;6733.759;6515.926;6838.509;8121.255;8176.457;9587.771;7095.666;12337.38;8311.039;7209.111;8937.326;10183.8;8837.891;9095.558;4140.278;4835.454;3968.897;4989.25;4251.401;4811.354;0	0
20140904-PurClathDigest-1ug-01	MULTI	1	324.98595	323.97867	37188.84765625	401	183	3	NaN	0.978672	-0.210358568784898	0.9039	324.987665901919	28.623	129.87	0	2283	2490		-1		0				NaN	82040	0;38617.39;44815.52;40557.32;42400.23;44570.41;43307.74;55498.11;69439.98;55999.96;56577.53;53872.07;50723.46;45027.5;54591.91;40430.62;49604.18;45432.34;42448.93;44628.02;47222.58;46496.39;45103.65;55588.24;48651.12;45804.09;44780.53;52793.38;49577.29;49368.97;54390.28;58941.82;52400.53;54462.75;52290.53;57711.75;47612.13;55479.53;66145.56;52723.59;51967.59;57893.3;63405.74;64105.05;62009.22;728…	0
20140904-PurClathDigest-1ug-01	MULTI	1	324.98649	323.97922	37188.91015625	101	41	3	NaN	0.979216	-0.209814932933966	1.638892	324.987871654733	30.003	30.275	0	2490	2543		-1		0				NaN	83369	0;40631.56;46083.9;38569.86;50881.2;49141.72;45417.05;50713.87;51837.97;41255.69;39820.16;46383.96;55614.42;53449.94;60512.36;47408.2;45948.38;41989.68;43402.55;39993.69;46653.74;47400.97;46487.37;43835.02;75601.58;67966.23;52521.86;62786.59;77204.59;83227.54;61808.23;61234.87;49656.61;68044.93;53840.42;57678.15;56305.45;59344.54;58962.11;48091.9;64943.59;20280.48;0	0
20140904-PurClathDigest-1ug-01	MULTI	1	333.19348	332.1862	35899.52734375	600	373	2	NaN	0.1862	-0.00660557379097781	0.575765	333.192805709721	28.399	268.47	0	2111	2535		-1		0				NaN	19238	0;4116.508;4310.524;4561.391;5578.876;5008.578;5204.769;5976.854;5017.563;7110.41;6312.668;3926.931;5527.154;5322.92;5745.847;4396.711;4933.33;4667.042;4618.17;5972.55;4399.536;5443.156;6220.475;3576.267;5346.191;5275.597;5450.778;5035.142;4373.025;4797.029;6903.838;5172.579;6505.296;7686.003;6658.432;5823.037;5599.625;6136.334;6154.78;5746.438;3677.182;6105.593;5700.253;6691.473;5561.426;5472.05…	0
20140904-PurClathDigest-1ug-01	MULTI	1	324.98582	323.97854	37875.578125	75	42	2	NaN	0.978542	-0.21048793546646	1.827974	324.986364526092	13.115	31.65	0	992	1037		-1		0				NaN	92305	0;4119.684;2890.451;7055.434;6697.84;6215.631;5222.331;5528.567;4509.96;22445.72;27073.37;39672.83;47948.91;61929.2;37641.63;40732.95;27787.21;29409.55;25708.19;45836.05;27039.04;37830.79;15650.14;90576.31;27885.46;17384.26;25622.44;31944.72;68655.7;31559.58;9369.329;21111.78;14698.47;25994.12;25789.78;20781.26;24070.95;20938.62;27154.21;20521.07;23406.1;17670.87;2529.838;0	0
20140904-PurClathDigest-1ug-01	MULTI	1	324.9869	323.97962	37875.703125	212	121	2	NaN	0.97962	-0.209410198818603	1.010277	324.987611990129	27.038	89.055	0	2173	2315		-1		0				NaN	75205	0;30335.19;33566.5;46541.02;38193.66;42942.78;40208.74;46836.55;52586.12;40610.97;48624.56;52153.99;66715.61;54138.73;44774.59;62146.45;50991.1;55981.13;50281.24;44811.63;42211.98;64122.51;49667.57;52837.14;43822.18;55971.91;55539.57;56477.16;62752.07;43595.67;42717.21;49349.32;52878.61;62973.58;55598.41;44437.71;44081.41;33403.14;43484.07;66719.19;43560.79;41924.9;43201;45259.76;42102.98;49169.7…	0
20140904-PurClathDigest-1ug-01	MULTI	1	331.00142	329.99415	36028.28125	1475	519	3	NaN	0.994147	-0.197650059491593	0.598797	331.002036832376	5.895	416.035	0	243	765		-1		0				NaN	331750	0;14100.99;26981.68;32605.45;34739.57;35543.38;35489.04;29256.45;31720.44;32603.58;29594.25;29005.68;32458.03;32539.89;30325.98;29624.21;34070.35;31516.79;30750.2;29137.34;30302.14;38149.04;34278.68;33118.94;31288.91;30149.75;32483.14;29202.63;28059.26;32742.45;29839.16;27671.45;28900.54;29766.35;27268.39;30232.79;34687.84;31437.32;32337.36;33530.04;29450.96;32843.79;27434.58;30798.45;28558.1;283…	0
20140904-PurClathDigest-1ug-01	MULTI	1	327.00811	326.00083	37036.8359375	938	501	2	NaN	0.000832	-0.189128746212987	0.508704	327.008071776313	5.923	403.63	0	261	765		-1		0				NaN	994870	0;44546.8;44660.68;52272.12;51175.13;49589.36;45575.86;52441.75;52167.82;50160.52;39883.03;50021.23;44871.1;45049.55;46943.71;46179.56;45355.46;49277.72;54183.43;49852.16;49340.3;55038.53;46703.2;49555.81;42258.36;50224.38;47069.93;41868.44;45964.84;47979.64;40204.87;47033.4;57092.36;49451.64;45197.8;54054.6;46688.02;48636.29;51881.95;45499.79;50678.51;59154.07;47569.34;47676.27;43571.71;46390.79…	0
20140904-PurClathDigest-1ug-01	MULTI	1	329.00508	327.9978	36593.18359375	910	455	2	NaN	0.997801	-0.193077504207849	0.509819	329.005049625754	5.841	370.69	0	306	764		-1		0				NaN	971740	0;572577.3;601369.7;581425.5;639505.3;603084.9;612824.4;568482.9;644401.3;602375.4;606321.8;653057.4;610095.5;601907.9;590479.8;553224.7;598604.9;571744.8;597652.1;553744.6;579329.6;605227.8;558274.6;599238.4;568690.6;615775.2;643530.9;563902.3;584222.8;636149.3;622904.2;658698.9;667023.8;650745.8;629374.1;591900.3;649914.3;627627.4;624911.5;676078.8;648619.4;626767.5;688308.1;669829.6;643304.7;6…	0
20140904-PurClathDigest-1ug-01	MULTI	1	327.00773	326.00045	37036.79296875	775	388	2	NaN	0.00045	-0.189509859031375	0.353772	327.007698345811	12.206	300.735	0	764	1157		-1		0				NaN	672750	0;195403.2;254459.4;291843.1;267371.1;346237.9;280971.3;263183.8;327307.8;338515.6;393523;342382.9;355216.5;358168.4;389932.1;384658.1;266540.1;302189.6;365049.8;430945.4;309329.7;415272.4;360865.3;433406;332901;320130.5;411127.3;339351;297072;330146.6;444704.8;312606.2;280764.5;333079.4;409518.8;292717.4;363811.3;321087.3;481767.4;453297.1;418518.6;432561.9;311064.3;281535.4;431320;391355.3;3371…	0
20140904-PurClathDigest-1ug-01	MULTI	1	329.00473	327.99745	36593.14453125	775	388	2	NaN	0.99745	-0.193428398413232	0.442255	329.004701194796	12.204	300.735	0	764	1157		-1		0				NaN	656710	0;205982;245563.4;279038;259605.6;336466.9;275654.9;246252.1;317312.3;340077.9;389176.1;336876.1;344060.7;356365.6;378881.5;386932.4;268295.6;299327.9;343763.8;412601.2;295726.9;398535.5;343483;421745;326040.8;312892.5;402294.6;327495;292835.4;317180;449952;304684.1;273144.2;319388;393693.8;289860.4;358497.4;300457;483354.4;444462;409279.6;411033.7;299998.6;274998.3;424590.3;393049.2;337248.3;332…	0
20140904-PurClathDigest-1ug-01	MULTI	1	331.00167	329.99439	36234.48046875	561	366	2	NaN	0.994395	-0.19740273222726	0.452049	331.001665359625	12	286.625	0	765	1136		-1		0				NaN	243770	0;79566.53;91072.59;79531.7;109925.1;87594.37;82057.88;102768;103846.5;124431;110876.7;109868.3;114546.3;122175.3;118939;87104.96;97738.32;109374.3;138202.4;91824.86;128900.3;111084.6;137660.9;104961.3;100200.8;129178.5;106732.1;92767.45;105239.3;143352.4;96064.41;87058.58;104507.2;131598.9;88496.87;116136.2;98486.68;148344.7;139172;129649.8;138164.7;99420.47;86127.24;138238.8;128738.8;107608.5;1…	0
20140904-PurClathDigest-1ug-01	MULTI	1	331.0023	329.99502	36028.37890625	1580	764	3	NaN	0.995021	-0.196777146254078	0.484087	331.002942706532	25.935	572.47	0	1624	2543		-1		0				NaN	336650	0;172482.5;163373.4;166884;191458.9;194957;230044;201642.8;206976.2;192992.3;212501.6;204596.8;210858;226876.7;215693.4;191797.5;222333.3;204789.9;198083.9;203199.8;228690.6;217038.3;245919.2;235277.4;204069.7;211111.3;222108.3;217094.9;224329.2;207993;239174.4;217781.9;237535.9;243021.5;211489.5;224590.9;223237.1;234877.2;235353.3;220734.9;239956;232546.1;186074.3;210082.7;237721.2;228563.3;2315…	0
20140904-PurClathDigest-1ug-01	MULTI	1	327.00876	326.00148	37036.91015625	1989	1226	2	NaN	0.00148	-0.188481004962625	0.249275	327.008704217638	23.791	941.995	0	1157	2559		-1		0				NaN	963800	0;251551.1;298384.2;256317.4;287932.6;303581.7;271890.8;289735.3;266333.9;244471.6;210717.7;294177.5;308723.8;256120.2;268612.1;271006;277908.5;288579.5;242613.3;267730.9;309204.2;299629;306768.8;312364.2;312643;303347.5;291809;285941.8;275515.8;327215;273636.9;281420.6;337811;306446.2;321327;335161.7;310914.4;293650.2;282899.5;330550;370381.6;345325.7;270852.3;313122.3;291367.8;292227;325280.7;2…	0
20140904-PurClathDigest-1ug-01	MULTI	1	329.00569	327.99842	36593.25390625	1637	1227	2	NaN	0.998416	-0.192463037398682	0.292919	329.005638431675	23.947	942.615	0	1156	2559		-1		0				NaN	1050900	0;254307.2;244420.1;287807;277548.9;281113.5;303329;276948.8;280903.3;262766.4;234587;199109.2;277613.4;312947.3;260335;265694.3;260812.8;282483.3;278803.4;242244.4;261295.3;309538.6;306630.4;307837.2;320845.9;303396.3;290757.5;273454.4;273679;267975.6;317557.8;289773.3;277586.3;312238.5;294995.6;296852.2;322508.7;302070.8;277644.2;265487;320114.1;365375.2;339788.6;266988.2;325477.7;290122.5;2841…	0
20140904-PurClathDigest-1ug-01	MULTI	1	331.0012	329.99392	36028.2578125	1110	480	3	NaN	0.993924	-0.197873066074692	0.614481	331.001881827214	18.19	378.811	0	1136	1624		-1		0				NaN	283620	0;67774.07;72255.43;85072;91946.49;91112.98;84749.95;77359.01;69632.16;78171.95;75270.76;70233.84;67680.28;78805.76;73595.5;77806.35;72416.21;75122.7;76697.9;85441.34;72592.65;76699.95;74949.42;91715.51;76619.22;80855.73;91237.1;79118.6;81927.1;67410.41;69793.38;59311.57;84323.3;89806.49;78297.05;81736.92;78061.12;80095.78;84196.16;65611.85;81478.64;94835.49;93789.88;89299.82;86456.38;95381.57;88…	0
20140904-PurClathDigest-1ug-01	MULTI	4	327.42293	1305.6626	36730.3359375	25	15	2	NaN	0.662634	0.0220288954055832	0.799539	327.42294641204	30.073	10.79	0	2513	2530		-1		0				NaN	25113	0;3960.17;8272.998;12361.76;17238.7;10626.3;10096.42;20516.7;20442;5231.271;21496.91;8923.54;6353.2;3181.749;6359.266;3016.787;0	0
20140904-PurClathDigest-1ug-01	MULTI	1	329.19124	328.18397	NaN	4	2	2	NaN	0.183967	-0.00699741818249322	4.355509	329.190098452484	30.255	4.851	0	2533	2551		-1		0				NaN	20539	0;5718.329;20016.83;0	0
20140904-PurClathDigest-1ug-01	MULTI	3	332.84586	995.51574	35138.296875	5	3	2	NaN	0.51574	0.0178032277318607	2.712981	332.845818872778	30.276	7.45	0	2535	2567		-1		0				NaN	425610	0;373769.1;197091.9;47576.41;0	0
20140904-PurClathDigest-1ug-01	MULTI	2	333.66297	665.31139	35036.72265625	8	5	2	NaN	0.311385	-0.0346578725191193	3.156682	333.66299611006	30.272	10.146	0	2533	2575		-1		0				NaN	291840	0;215450.2;272899.4;218670.4;79785.76;69456.21;0	0
20140904-PurClathDigest-1ug-01	MULTI	3	318.50323	952.48786	29759.662109375	11	5	3	NaN	0.487864	0.00971930383650488	2.890914	318.503311145132	30.309	11	0	2535	2583		-1		0				NaN	210020	0;61061.65;231918.6;204854.5;69511;31475.28;0	0
20140904-PurClathDigest-1ug-01	MULTI	2	324.69912	647.38369	37206.16015625	29	14	4	NaN	0.38369	0.0458931018714566	0.92346	324.699110908159	30.297	18.181	0	2526	2591		-1		0				NaN	36757000	0;3616.356;5659.616;5502.902;5022.603;5478.384;6126.249;5923.886;2871.261;2.483818E+07;3.6705E+07;1.578378E+07;6580819;2226737;948487.2;0	0
20140904-PurClathDigest-1ug-01	MULTI	3	325.53418	973.58071	38675.4140625	6	4	2	NaN	0.58071	0.0928626889731277	2.480799	325.534326846079	30.324	9.195	0	2543	2583		-1		0				NaN	159350	0;92779.58;140989.6;62343.35;57621.48;0	0
20140904-PurClathDigest-1ug-01	MULTI	3	322.17058	963.48991	35930.71875	7	4	2	NaN	0.489913	0.00670772246633078	1.815817	322.17044667608	30.328	9.195	0	2543	2583		-1		0				NaN	705460	0;73099.94;624170.4;275058.9;27276.36;0	0
20140904-PurClathDigest-1ug-01	MULTI	2	321.68254	641.35053	37514.9140625	14	6	3	NaN	0.350532	0.0155102925898518	0.831713	321.68248609933	30.328	12.77	0	2543	2599		-1		0				NaN	4447100	0;1363149;4400433;1346470;503076.3;218124.8;37338.59;0	0
20140904-PurClathDigest-1ug-01	MULTI	3	329.1821	984.52448	36818.203125	12	5	3	NaN	0.524483	0.0316014411974948	0.922639	329.182064298655	30.368	10.65	0	2551	2599		-1		0				NaN	2193600	0;105438.3;2135226;876202.8;283612.3;273208.5;0	0
20140904-PurClathDigest-1ug-01	MULTI	2	327.1719	652.32924	37015.65234375	21	15	3	NaN	0.32924	-0.0108312381371434	1.996608	327.171711830238	30.322	19.966	0	2526	2599		-1		0				NaN	1723300	0;2862.24;1111.564;3222.445;3908.127;4706.395;3631.079;3531.03;17281.63;127990;1103567;1705193;401909.8;200983;72189.24;39927.82;0	0
20140904-PurClathDigest-1ug-01	MULTI	2	332.67433	663.33412	36337.40234375	10	9	2	NaN	0.334116	-0.0110179019301313	1.244496	332.67428399483	30.34	18.235	0	2535	2615		-1		0				NaN	855040	0;15080.25;338495.3;799557;440851.9;104619.6;28130.16;23420.63;0;0;0	0
20140904-PurClathDigest-1ug-01	MULTI	2	318.16274	634.31093	36802.3203125	12	6	2	NaN	0.310928	-0.0208555020095673	1.238087	318.162750750496	30.402	12.53	0	2559	2615		-1		0				NaN	1988100	0;272909.5;1657138;1859114;452507.3;170828.7;63354.95;0	0
20140904-PurClathDigest-1ug-01	MULTI	2	328.12305	654.23155	NaN	5	3	2	NaN	0.231549	-0.109397446376306	1.840373	328.122964701118	30.433	7.135	0	2575	2607		-1		0				NaN	212250	0;134482.2;198480.9;53371.27;0	0
20140904-PurClathDigest-1ug-01	MULTI	3	329.53104	985.57129	37775.80078125	7	4	2	NaN	0.571292	0.0779294382659828	1.793104	329.531002289202	30.373	8.87	0	2559	2599		-1		0				NaN	563480	0;494843.5;249397.5;138659.5;76175.41;0	0
20140904-PurClathDigest-1ug-01	MULTI	2	332.6865	663.35845	37309.953125	17	8	3	NaN	0.358452	0.0133067028625646	1.931844	332.686780871178	30.482	16.36	0	2575	2647		-1		0				NaN	1771000	0;93066.17;1496863;1710520;873100.7;591602.5;293106.8;93290.16;51964.88;0	0
20140904-PurClathDigest-1ug-01	MULTI	2	327.68156	653.34857	35262.48828125	5	3	2	NaN	0.348572	0.00803161251280926	2.207162	327.681674293845	30.53	7.355	0	2599	2631		-1		0				NaN	190320	0;96630.81;177974.2;81200.56;0	0
20140904-PurClathDigest-1ug-01	MULTI	3	329.50922	985.50582	35183.0390625	4	2	2	NaN	0.505818	0.0124858019784142	2.35048	329.508986002642	30.52	5.545	0	2599	2623		-1		0				NaN	155850	0;84103.45;136864.1;0	0
20140904-PurClathDigest-1ug-01	MULTI	2	326.70515	651.39574	36639.09375	20	8	4	NaN	0.395743	0.0561010305257241	0.612855	326.705075969621	30.538	16.415	0	2591	2663		-1		0				NaN	3908200	0;269111.3;2228076;3902728;2156111;765836.1;217441.7;63321.39;43040.3;0	0
20140904-PurClathDigest-1ug-01	MULTI	1	340.9952	339.98793	NaN	4	2	2	NaN	0.987927	-0.208467377308068	3.589507	340.995755039569	0.028	2.025	0	1	4		-1		0				NaN	3706.3	0;1033.641;3612.104;0	0
20140904-PurClathDigest-1ug-01	MULTI	1	340.99387	339.98659	NaN	7	4	2	NaN	0.986595	-0.209799301455632	3.617328	340.991775095816	0.061	3.375	0	3	8		-1		0				NaN	3498.7	0;2657.441;2077.229;3684.183;2941.748;0	0
20140904-PurClathDigest-1ug-01	MULTI	1	340.99227	339.98499	NaN	4	2	2	NaN	0.98499	-0.211402915683095	4.760128	340.989842313744	0.2	1.97	0	17	20		-1		0				NaN	2569.6	0;2455.877;2504.331;0	0
20140904-PurClathDigest-1ug-01	MULTI	1	340.98381	339.97653	28642.056640625	10	7	2	NaN	0.976529	-0.219859765289698	3.383448	340.98601665996	0.652	5.275	0	56	64		-1		0				NaN	5435	0;778.4528;4915.736;4608.608;6340.542;5296.855;2850.03;0;0	0
20140904-PurClathDigest-1ug-01	MULTI	1	340.98869	339.98141	25811.16015625	6	5	2	NaN	0.981413	-0.21497851110604	3.966732	340.990250288877	0.738	3.845	0	65	71		-1		0				NaN	8343.7	0;6819.004;4467.677;4296.833;3002.484;0;0	0
20140904-PurClathDigest-1ug-01	MULTI	1	340.99404	339.98676	20989.130859375	13	8	2	NaN	0.986761	-0.209632612144731	4.35519	340.995746916629	0.869	5.755	0	74	83		-1		0				NaN	13379	0;2618.477;4285.504;2781.965;2187.947;6041.214;5560.484;3268.935;0;0	0
20140904-PurClathDigest-1ug-01	MULTI	1	340.9909	339.98362	NaN	8	5	2	NaN	0.983624	-0.212768270395998	5.23754	340.988478484296	1.528	3.995	0	136	142		-1		0				NaN	5606.3	0;1834.309;2586.453;2793.681;1357.416;971.6943;0	0
20140904-PurClathDigest-1ug-01	MULTI	1	341.98632	340.97904	21621.865234375	6	5	2	NaN	0.979045	-0.217805750557204	8.963262	341.988406308214	1.74	4.035	0	154	160		-1		0				NaN	5811.4	0;687.7747;733.312;778.8493;1387.564;4485.611;0	0
20140904-PurClathDigest-1ug-01	MULTI	1	340.03942	339.03214	NaN	7	5	2	NaN	0.032143	-0.163812099621794	4.365504	340.038164178275	1.741	4.035	0	155	161		-1		0				NaN	2311.2	0;628.2009;936.912;1888.859;1763.846;2211.584;0	0
20140904-PurClathDigest-1ug-01	MULTI	1	340.99554	339.98827	25499.02734375	9	6	2	NaN	0.988267	-0.208127691144455	4.208615	340.997647850377	1.821	4.655	0	162	169		-1		0				NaN	6792	0;4166.875;2873.333;2778.33;3589.959;1074.385;0;0	0
20140904-PurClathDigest-1ug-01	MULTI	1	340.99323	339.98595	NaN	6	4	2	NaN	0.985954	-0.210439138681579	3.60719	340.991601160346	1.914	3.305	0	172	177		-1		0				NaN	3320.3	0;2713.591;2408.627;2413.3;986.2289;0	0
20140904-PurClathDigest-1ug-01	MULTI	1	340.99687	339.98959	NaN	9	7	2	NaN	0.989589	-0.206806672314599	3.356782	340.996894851429	1.986	5.19	0	177	185		-1		0				NaN	4476.9	0;632.4496;1053.681;4363.099;1804.642;2337.694;1518.659;876.2715;0	0
20140904-PurClathDigest-1ug-01	MULTI	1	341.98463	340.97736	NaN	4	2	2	NaN	0.977357	-0.219492512144086	3.762677	341.98630014738	1.996	1.99	0	180	183		-1		0				NaN	4435.8	0;1678.035;4323.014;0	0
20140904-PurClathDigest-1ug-01	MULTI	1	340.98831	339.98103	21360.880859375	7	5	2	NaN	0.98103	-0.215361766151432	6.448215	340.985073339688	2.177	3.945	0	195	201		-1		0				NaN	8256.3	0;1858.818;1773.78;2354.407;8046.423;2997.303;0	0
20140904-PurClathDigest-1ug-01	MULTI	1	344.01254	343.00526	34214.2109375	51	34	2	NaN	0.005263	-0.192518942992194	2.2624	344.013964791557	2.111	22.79	0	174	209		-1		0				NaN	5659.3	0;2307.646;2670.978;2139.718;3735.684;3024.648;4045.991;2378.572;2841.768;4233.754;2859.741;2977.592;2902.948;4062.881;4152.956;4157.057;3934.182;4475.355;4028.496;5203.905;2217.009;5515.491;5018.697;3663.245;2622.175;3281.046;3716.031;4556.75;4955.031;5372.813;2992.1;4756.172;2195.327;0;0;0	0
20140904-PurClathDigest-1ug-01	MULTI	1	340.99454	339.98726	41622.7109375	7	5	2	NaN	0.987261	-0.209133185760436	6.186172	340.997905430446	2.301	4.085	0	207	213		-1		0				NaN	4364.7	0;3451.302;3852.54;4253.778;1569.675;0;0	0
20140904-PurClathDigest-1ug-01	MULTI	1	340.9878	339.98052	25080.208984375	5	3	2	NaN	0.980523	-0.215867604929144	6.362468	340.989716062547	2.827	2.775	0	254	258		-1		0				NaN	7548.5	0;5222.064;7356.61;1376.898;0	0
20140904-PurClathDigest-1ug-01	MULTI	1	340.99379	339.98652	NaN	7	5	2	NaN	0.986516	-0.209877446825999	3.224372	340.993717422464	2.888	4.245	0	258	264		-1		0				NaN	6958.3	0;1240.595;2772.014;6763.235;1458.532;0;0	0
20140904-PurClathDigest-1ug-01	MULTI	1	340.98649	339.97921	21973.771484375	5	3	2	NaN	0.979209	-0.217181665109649	4.374435	340.987236945313	3.342	2.855	0	297	301		-1		0				NaN	7007.8	0;3558.533;3772.323;6829.699;0	0
20140904-PurClathDigest-1ug-01	MULTI	1	340.99009	339.98281	26589.2578125	8	8	2	NaN	0.982814	-0.213578001357178	4.362918	340.987970237256	3.441	6.486	0	303	312		-1		0				NaN	5764.3	0;2090.542;1961.859;2119.99;3036.937;5617.787;610.6858;0;0;0	0
20140904-PurClathDigest-1ug-01	MULTI	1	340.98364	339.97637	43480.28515625	6	4	2	NaN	0.976368	-0.220020845438057	4.224894	340.986352964779	3.504	3.564	0	311	316		-1		0				NaN	3528.9	0;3136.014;3439.199;1886.593;0;0	0
20140904-PurClathDigest-1ug-01	MULTI	1	343.99463	342.98736	37536.76953125	82	51	2	NaN	0.987358	-0.210416364085972	2.663038	343.996762876674	2.967	36.355	0	238	290		-1		0				NaN	4568	0;1790.527;2798.93;2225.473;1011.964;1501.755;1879.801;2909.858;2402.76;2119.19;3733.274;1975.006;1288.586;3593.85;1670.125;2486.129;2016.313;2197.576;2184.782;2755.626;3606.662;3375.826;3275.202;2743.218;3177.832;2276.329;3043.472;3686.018;4528.804;4875.882;3920.172;2210.254;4606.385;3819.55;3131.235;3095.988;2903.237;3770.663;4149.576;3600.811;2953.917;2881.483;3805.168;4182.703;5038.548;3814.9…	0
20140904-PurClathDigest-1ug-01	MULTI	1	343.99427	342.98699	37536.73046875	95	59	2	NaN	0.986994	-0.210780412227791	2.887365	343.996510655694	2.427	41.005	0	197	257		-1		0				NaN	5291.6	0;1248.448;1352.102;3821.547;4215.121;4977.15;5157.092;4177.138;4927.011;3344.603;3689.818;3663.365;5224.273;4198.739;3992.606;4500.266;3609.365;4997.229;3642.161;3573.822;1758.584;3441.703;3691.208;4264.438;2845.221;4138.687;3988.666;2940.741;4273.9;4792.743;4204.758;3032.286;3280.764;2747.299;4553.599;4131.833;3248.552;3707.512;4338.396;1875.658;1313.945;1579.216;1114.966;1566.331;1536.821;1183…	0
20140904-PurClathDigest-1ug-01	MULTI	1	340.99476	339.98748	22582.5234375	7	5	2	NaN	0.98748	-0.208913783747732	3.260824	340.993754112625	3.701	4.275	0	327	333		-1		0				NaN	6031.7	0;4929.498;5399.127;2708.276;2346.544;1572.225;0	0
20140904-PurClathDigest-1ug-01	MULTI	1	340.99208	339.98481	NaN	5	3	2	NaN	0.984806	-0.211586981583821	4.267714	340.991101744501	3.757	2.84	0	332	336		-1		0				NaN	1589	0;1298.639;1891.458;1259.606;0	0
20140904-PurClathDigest-1ug-01	MULTI	1	340.98455	339.97727	38603.8125	4	2	2	NaN	0.977275	-0.219114824458359	4.938875	340.986802037459	3.819	1.99	0	338	341		-1		0				NaN	4907.7	0;4782.952;4760.729;0	0
20140904-PurClathDigest-1ug-01	MULTI	1	340.9904	339.98312	30052.607421875	9	7	2	NaN	0.983123	-0.21326901596683	4.343034	340.992366410633	3.893	5.375	0	343	351		-1		0				NaN	6632.5	0;2305.956;6463.92;4592.128;2526.201;760.5912;909.4777;2366.158;0	0
20140904-PurClathDigest-1ug-01	MULTI	1	340.98981	339.98253	28096.63671875	10	8	2	NaN	0.982531	-0.213861164248669	3.97508	340.992738202496	4.033	6.055	0	354	363		-1		0				NaN	7099.8	0;1239.371;4928.345;4629.605;5333.166;4318.068;1663.941;1010.856;0;0	0
20140904-PurClathDigest-1ug-01	MULTI	1	340.98912	339.98184	26077.740234375	9	7	2	NaN	0.98184	-0.214551170543302	3.89141	340.989098587816	4.078	5.35	0	357	365		-1		0				NaN	8719.7	0;1777.521;1647.596;1517.67;2073.403;4434.708;8498.075;0;0	0
20140904-PurClathDigest-1ug-01	MULTI	1	340.99675	339.98948	NaN	6	5	2	NaN	0.989478	-0.20691747883285	4.123463	340.99745228608	4.254	4.005	0	375	381		-1		0				NaN	6072.8	0;1394.896;2866.078;5142.675;5918.445;0;0	0
20140904-PurClathDigest-1ug-01	MULTI	1	340.98809	339.98082	21635.80859375	9	7	2	NaN	0.980817	-0.215574597572015	3.440821	340.989070146773	4.302	5.35	0	380	388		-1		0				NaN	8185.3	0;7977.249;5028.066;5046.815;2558.115;1582.423;1407.855;0;0	0
20140904-PurClathDigest-1ug-01	MULTI	1	340.9946	339.98733	24709.818359375	6	4	2	NaN	0.987326	-0.209068410218833	4.095304	340.993302553111	4.429	3.305	0	392	397		-1		0				NaN	6695.9	0;5001.847;2953.378;6520.313;0;0	0
20140904-PurClathDigest-1ug-01	MULTI	5	342.97976	1709.8624	NaN	5	3	2	NaN	0.862438	0.03590124004063	4.205024	342.980581318839	4.769	2.675	0	423	427		-1		0				NaN	3013	0;1305.808;895.8485;1090.1;0	0
20140904-PurClathDigest-1ug-01	MULTI	5	342.98344	1709.8808	NaN	4	2	2	NaN	0.880822	0.0542772778187555	4.337467	343.183621632769	4.912	2.03	0	436	439		-1		0				NaN	4189.5	0;1377.966;2925.369;0	0
20140904-PurClathDigest-1ug-01	MULTI	1	343.99433	342.98705	36110.53515625	34	20	2	NaN	0.987054	-0.210720247175118	3.937569	343.996702199266	4.82	14.14	0	418	439		-1		0				NaN	5772.3	0;1046.672;1334.913;1243.124;1636.083;3050.349;3678.416;3653.562;4845.45;6037.008;4164.202;3801.768;4649.962;5651.932;3935.786;3497.053;4138.68;4782.493;5625.531;1552.026;1827.996;0	0
20140904-PurClathDigest-1ug-01	MULTI	1	340.9856	339.97833	NaN	6	4	2	NaN	0.978325	-0.218064709733824	4.122704	340.982888706994	4.91	3.385	0	435	440		-1		0				NaN	2833.1	0;2315.367;1414.075;2167.314;1780.969;0	0
20140904-PurClathDigest-1ug-01	MULTI	1	340.98342	339.97614	30961.63671875	8	7	2	NaN	0.976139	-0.220249832890886	2.824564	340.982741600364	4.99	5.41	0	439	447		-1		0				NaN	5547.9	0;532.6169;943.7454;1283.439;1289.081;1294.723;5406.839;427.9412;0	0
20140904-PurClathDigest-1ug-01	MULTI	1	340.98988	339.9826	23659.04296875	6	4	2	NaN	0.982605	-0.213787361893196	4.627763	340.986961912621	5.753	4.22	0	504	509		-1		0				NaN	4211.6	0;2065.061;1707.686;2324.139;0;0	0
20140904-PurClathDigest-1ug-01	MULTI	1	340.03413	339.02685	37530.2421875	35	26	2	NaN	0.026851	-0.16910181295151	4.311039	340.036466924945	5.689	23.015	0	491	518		-1		0				NaN	2936.3	0;923.3905;721.9851;520.5797;2215.374;1470.677;3257.967;1736.815;1787.263;2172.672;1521.505;1037.58;1456.121;1198.617;1456.328;1011.646;784.8934;403.871;583.4886;763.1062;974.0033;815.5133;853.4963;891.4793;813.5466;0;0;0	0
20140904-PurClathDigest-1ug-01	MULTI	1	340.98967	339.98239	38989.76171875	9	6	2	NaN	0.982391	-0.214001241217829	5.370653	340.99256727199	5.813	6.22	0	508	515		-1		0				NaN	3364	0;2749.263;949.8809;3210.846;3054.306;1202.07;643.7468;0	0
20140904-PurClathDigest-1ug-01	MULTI	1	341.00087	339.99359	NaN	6	5	2	NaN	0.993595	-0.202802267595814	3.894321	341.002535473296	5.836	5.345	0	509	515		-1		0				NaN	2829.2	0;684.0342;474.0575;855.149;2757.237;0;0	0
20140904-PurClathDigest-1ug-01	MULTI	2	348.29647	694.57838	NaN	4	2	2	NaN	0.57838	0.218873641066693	1.340944	348.296557910344	5.941	2.69	0	518	521		-1		0				NaN	1532.5	0;716.3325;1423.383;0	0
20140904-PurClathDigest-1ug-01	MULTI	1	340.98558	339.97831	39968.57421875	11	9	2	NaN	0.978307	-0.218082541405522	4.360945	340.985784347293	5.954	9.085	0	515	525		-1		0				NaN	3260.4	0;1207.002;511.2706;2664.596;672.3281;1143.11;2149.34;993.7443;1546.602;2062.358;0	0
20140904-PurClathDigest-1ug-01	MULTI	1	340.98325	339.97597	27154.6015625	7	4	2	NaN	0.975972	-0.220417443955625	4.245422	340.982091689005	6.037	4.515	0	524	529		-1		0				NaN	3583.3	0;3492.169;1407.945;1240.889;1488.304;0	0
20140904-PurClathDigest-1ug-01	MULTI	1	340.98475	339.97747	28617.404296875	8	8	2	NaN	0.977471	-0.218918375268686	3.770905	340.984187462316	6.387	7.695	0	546	555		-1		0				NaN	5313.3	0;4342.376;968.1938;1949.307;4935.366;3545.971;738.95;0;0;0	0
20140904-PurClathDigest-1ug-01	MULTI	1	340.99293	339.98565	NaN	7	5	2	NaN	0.985652	-0.210741223657578	1.572703	340.992918206267	6.479	5.245	0	553	559		-1		0				NaN	4502.3	0;349.2018;571.1217;4387.899;2495.731;627.4986;0	0
20140904-PurClathDigest-1ug-01	MULTI	1	340.03304	339.02576	37530.12109375	32	26	2	NaN	0.025761	-0.17019037826401	4.340225	340.036624197618	6.483	23.575	0	545	572		-1		0				NaN	1924.9	0;312.2181;392.1852;813.6799;804.4639;629.8214;2057.803;1874.858;1263.485;2090.008;1440.078;1929.16;1955.675;1157.828;1348.629;717.2606;437.8254;699.4186;426.4074;1573.153;700.0416;919.1198;940.2659;961.412;629.9128;393.5012;0;0	0
20140904-PurClathDigest-1ug-01	MULTI	1	340.98293	339.97566	NaN	7	4	2	NaN	0.975658	-0.220731232483672	3.393163	340.980674172645	6.881	4.55	0	581	586		-1		0				NaN	1616.1	0;615.8226;1577.432;1661.573;1108.053;0	0
20140904-PurClathDigest-1ug-01	MULTI	1	340.03415	339.02688	37530.24609375	32	24	2	NaN	0.026878	-0.169073864974393	4.151467	340.036498029983	6.909	21.885	0	572	597		-1		0				NaN	2516.9	0;467.2982;640.3215;329.9073;419.7016;509.4959;688.2487;550.6295;2056.942;1385.176;1093.686;1101.825;1181.556;1345.64;2432.208;2107.496;1227.278;2601.79;491.7263;688.183;691.7904;785.0992;1098.223;453.5099;0;0	0
20140904-PurClathDigest-1ug-01	MULTI	6	340.82855	2038.9276	32169.35546875	8	7	2	NaN	0.927643	-0.0502636870855895	4.262749	340.995521241503	7.007	6.995	0	587	595		-1		0				NaN	10909	0;1479.292;857.8842;236.4768;1986.381;1860.651;2685.989;0;0	0
20140904-PurClathDigest-1ug-01	MULTI	1	340.9826	339.97532	30208.9765625	8	5	2	NaN	0.975323	-0.221065626433926	3.978912	340.983211593787	7.312	5.305	0	610	616		-1		0				NaN	2046.6	0;880.3457;1485.005;1994.537;1291.403;551.637;0	0
20140904-PurClathDigest-1ug-01	MULTI	1	344.01119	343.00391	36409.4375	144	103	2	NaN	0.00391	-0.193871713379735	1.353066	344.012809561447	6.924	92.865	0	536	642		-1		0				NaN	4091.5	0;1717.23;1623.7;2723.592;2260.308;1561.122;3343.876;2021.98;2137.197;1500.307;2066.212;1632.399;1963.979;1844.702;1984.347;1378.385;2307.852;2576.898;1801.449;2221.942;1819.147;3052.202;2837.117;1607.155;2209.415;2461.164;2031.223;1478.371;2653.202;3532.366;2274.164;1885.012;2929.936;2136.482;2699.978;2559.457;2432.284;2999.054;3489.975;2717.421;2304.753;3060.859;2388.541;4068.229;3063.546;2873.…	0
20140904-PurClathDigest-1ug-01	MULTI	1	346.16284	345.15556	NaN	10	10	2	NaN	0.155559	-0.0432129091807951	3.49127	346.159511956563	7.441	10.695	0	614	627		-1		0				NaN	1588.9	0;301.1401;280.6023;577.0786;805.0629;668.8964;532.7298;975.2607;1503.262;0;0;0	0
20140904-PurClathDigest-1ug-01	MULTI	2	338.68947	675.36439	30243.0234375	74	52	2	NaN	0.364386	0.0137182673845473	0.638854	338.68973289434	7.503	48.71	0	601	656		-1		0				NaN	4758.1	0;1416.151;2104.371;2053.05;2210.388;3881.517;2637.881;3327.902;2524.798;3307.062;3986.359;2818.101;2452.512;3171.962;3477.47;2340.997;4208.726;3351.109;1812.364;3714.171;2394.349;2935.133;3133.487;4419.368;3812.499;2776;3757.921;2121.521;1408.154;2079.097;2505.623;1992.273;1446.071;2585.946;2489.075;3276.472;2576.495;2017.321;2476.592;2690.205;2762.637;2818.263;3407.101;2029.256;1114.174;2260.48…	0
20140904-PurClathDigest-1ug-01	MULTI	1	340.96821	339.96094	32509.15234375	8	7	2	NaN	0.960938	-0.235443719581099	3.95848	340.965838389256	7.729	7.255	0	637	645		-1		0				NaN	1935.7	0;573.1595;429.186;285.2124;672.3469;1477.548;1581.942;0;0	0
20140904-PurClathDigest-1ug-01	MULTI	1	340.97627	339.96899	NaN	6	4	2	NaN	0.968994	-0.227391654119231	4.303712	340.975326195809	7.779	4.56	0	643	648		-1		0				NaN	1245.6	0;812.319;1213.922;866.7473;420.1214;0	0
20140904-PurClathDigest-1ug-01	MULTI	1	334.14735	333.14008	41088.8203125	6	3	2	NaN	0.140077	-0.0531670943295808	4.369067	334.145937589952	7.856	3.685	0	648	652		-1		0				NaN	1500.2	0;938.044;839.8416;1462.062;0	0
20140904-PurClathDigest-1ug-01	MULTI	1	334.00442	332.99714	36031.19921875	24	14	2	NaN	0.997139	-0.196039439199581	4.297324	334.001822733202	7.821	13.65	0	641	656		-1		0				NaN	1848.6	0;447.2877;1324.835;1071.113;1466.855;1406.208;1158.615;1501.868;1090.748;1801.641;1301.659;793.772;1153.679;332.6868;0;0	0
20140904-PurClathDigest-1ug-01	MULTI	1	340.03375	339.02648	43133.3046875	34	21	2	NaN	0.026476	-0.16947619435382	4.347603	340.036930175252	7.865	20.24	0	639	661		-1		0				NaN	1947.7	0;1043.04;968.0087;892.9769;623.0823;717.9406;1126.673;1587.769;1159.242;1898.187;1125.781;1328.028;934.3796;1104.056;1709.923;1589.448;1468.974;599.9088;1882.973;828.0911;269.6793;0;0	0
20140904-PurClathDigest-1ug-01	MULTI	1	338.00459	336.99731	38640.05078125	74	51	2	NaN	0.997314	-0.197705001699887	2.954797	338.006864539592	8.111	47.93	0	635	687		-1		0				NaN	2605.8	0;615.5411;548.736;816.21;844.8663;910.191;961.0534;1011.916;646.8171;676.998;623.8707;769.484;719.3182;394.9198;1318.649;530.0026;454.6729;782.284;1109.895;852.3461;786.4818;857.1304;1640.34;1642.41;1346.895;1369.599;1220.161;1424.737;1428.863;1518.036;2005.686;1713.026;1450.108;1856.042;2006.915;1923.813;1578.466;1425.364;1801.267;1795.973;1503.881;2182.523;1007.441;2381.822;1708.29;1515.025;16…	0
20140904-PurClathDigest-1ug-01	MULTI	6	340.99621	2039.9336	NaN	12	11	2	NaN	0.933617	-0.0447528106856225	3.46535	340.996878816008	8.402	11.06	0	682	694		-1		0				NaN	2788.3	0;826.9053;984.4117;1763.788;795.7675;292.9912;450.9341;608.8769;330.6212;387.0643;0;0;0	0
20140904-PurClathDigest-1ug-01	MULTI	1	340.04206	339.03478	35955.39453125	53	32	2	NaN	0.03478	-0.161176382836743	4.210745	340.03669850917	8.243	30.56	0	659	692		-1		0				NaN	2124.8	0;1102.214;1006.386;1438.934;1986.522;1417.82;928.617;878.5244;1480.607;2558.073;2500.408;1601.427;1494.152;1661.834;1019.6;796.9869;2070.804;1694.403;1318.001;1864.471;1308.385;921.3992;1911.395;1812.982;1524.441;1593.936;1674.548;1205.08;1222.178;814.6094;0;0;0;0	0
20140904-PurClathDigest-1ug-01	MULTI	1	340.98901	339.98173	26157.91796875	9	8	2	NaN	0.981732	-0.214660002674577	2.708704	340.988946475219	8.438	8.275	0	683	692		-1		0				NaN	3385.9	0;1607.773;1313.635;1019.498;2767.161;2019.176;1740.189;783.7457;611.1768;0	0
20140904-PurClathDigest-1ug-01	MULTI	1	340.98253	339.97526	41972.33203125	5	4	2	NaN	0.975255	-0.221133600144015	3.36577	340.980679580892	8.515	4.785	0	691	696		-1		0				NaN	1893.2	0;1845.074;1573.537;845.2212;0;0	0
20140904-PurClathDigest-1ug-01	MULTI	1	346.16419	345.15692	28500.12890625	21	16	2	NaN	0.156918	-0.0418538055738509	4.098042	346.159757752411	8.559	16.21	0	689	706		-1		0				NaN	2359.1	0;716.3351;967.965;829.0165;2299.148;1768.136;1858.443;1280.727;1488.265;1275.121;477.6438;651.5819;844.1761;636.4636;0;0;0;0	0
20140904-PurClathDigest-1ug-01	MULTI	2	344.23902	686.46349	37660.82421875	17	15	2	NaN	0.463493	0.107720184622281	1.525997	344.238647273091	8.599	15.245	0	690	706		-1		0				NaN	1942.8	0;464.0754;789.7504;1115.425;1309.844;327.0451;737.4459;1120.516;746.7031;1345.288;1714.17;415.3345;786.3905;1157.447;0;0;0	0
20140904-PurClathDigest-1ug-01	MULTI	1	338.0044	336.99713	39749.9609375	32	18	2	NaN	0.997128	-0.197890954909838	4.065092	338.006702938208	8.568	18.075	0	687	706		-1		0				NaN	1642.5	0;496.9818;1469.943;917.5686;1406.707;1650.173;1797.395;1000.876;1765.267;1685.104;909.3521;999.9095;1600.791;1134.366;1570.683;1607.987;1177.477;425.4427;0;0	0
20140904-PurClathDigest-1ug-01	MULTI	1	343.17883	342.17155	33844.33203125	109	72	2	NaN	0.171555	-0.025844144418727	0.586589	343.178773771344	7.65	66.755	0	594	669		-1		0				NaN	12320	0;3696.594;4053.922;4825.18;5196.757;5674.883;5718.23;4931.394;9347.299;4355.468;5920.87;2959.975;7309.99;8945.001;5607.18;4480.922;6269.007;6453.188;6705.678;4596.59;5680.644;8208.603;6547.154;6654.441;9481.293;1960.773;7646.977;8480.217;6056.211;5481.408;7503.694;2761.904;6596.719;11586.93;6014.713;6335.56;6957.555;9378.527;6297.801;11276.69;8810.198;9908.735;12272.08;11294.42;6143.699;6421.008…	0
20140904-PurClathDigest-1ug-01	MULTI	1	343.17874	342.17146	33844.32421875	55	38	2	NaN	0.17146	-0.0259389302336785	0.609743	343.178689477571	8.402	36.135	0	669	708		-1		0				NaN	15651	0;6465.677;8632.861;9230.534;11158.81;15253.34;8738.838;11281.87;8591.859;7328.247;8109.673;10321.45;7336.698;11031.81;7465.043;7868.908;8786.204;10844.26;9486.346;6194.48;4205.922;5365.714;8777.051;9596.155;10834.58;9307.28;5785.098;8766.695;11104;6284.466;7089.218;8893.222;7152.455;4325.33;6179.147;3566.61;5076.261;712.7156;672.3736;0	0
20140904-PurClathDigest-1ug-01	MULTI	5	346.97253	1729.8263	33892.7109375	55	33	2	NaN	0.826257	-0.00946331986324367	0.602581	346.972516891831	8.242	31.52	0	659	693		-1		0				NaN	5537.6	0;1536.853;1920.742;1820.918;3581.273;2035.854;2927.501;2663.12;2808.383;2951.51;3222.521;3826.229;3146.333;2757.587;2841.433;2142.13;3094.113;2568.339;2234.361;3443.514;2710.479;2959.611;3197.044;2471.026;1668.257;2485.984;1123.022;2427.071;1568.938;2284.479;1504.071;1806.478;1587.798;1400.432;0	0
20140904-PurClathDigest-1ug-01	MULTI	1	335.12415	334.11687	32579.9140625	346	252	2	NaN	0.116874	-0.0768200759283104	0.442644	335.124084249748	6.841	219	0	449	704		-1		0				NaN	22197	0;5198.278;4198.334;3891.503;6564.375;5431.902;4800.749;5049.265;6424.229;4166.053;4906.548;4986.722;4823.667;2734.552;5509.523;4904.339;3949.148;4442.311;3893.201;7132.545;5442.563;7078.541;4572.918;7164.675;5877.061;7329.651;7186.473;5885.112;6506.591;7856.793;7539.293;5847.723;6645.024;5614.16;7993.403;7174.006;8323.358;6149.236;7283.506;8613.352;8167.836;7093.044;7197.104;7350.643;7453.308;72…	0
20140904-PurClathDigest-1ug-01	MULTI	2	338.68979	675.36503	36087.93359375	12	9	2	NaN	0.365033	0.0143650642171451	0.898606	338.689694451966	9.154	9.225	0	729	739		-1		0				NaN	2208.6	0;900.6273;785.6951;755.3757;1489.076;2096.519;1671.845;1711.735;964.3423;590.4401;0	0
20140904-PurClathDigest-1ug-01	MULTI	1	340.99313	339.98585	30873.3125	14	12	2	NaN	0.985854	-0.210539939504429	4.283617	340.994560339682	9.291	11.83	0	737	750		-1		0				NaN	3170.7	0;365.1088;316.7588;766.0065;1423.748;3090.131;1654.448;1476.71;1731.18;1119.5;507.8199;1502.474;0;0	0
20140904-PurClathDigest-1ug-01	MULTI	1	339.03714	338.02987	36952.75390625	135	76	2	NaN	0.029867	-0.165626716564759	1.126705	339.037836730686	9.074	70.855	0	689	766		-1		0				NaN	10070	0;201.0687;668.1509;344.2035;556.2554;768.3123;2729.891;4529.269;2739.184;3799.281;4878.285;3913.979;4110.001;5648.071;5642.844;5621.017;4075.466;4853.877;5702.204;7160.59;6851.533;5186.794;4840.449;6133.063;5598.891;7060.676;6691.932;6122.054;4095.88;4092.486;4398.729;6106.756;6401.168;4291.235;7412.381;4675.91;4501.25;4661.903;9813.822;3728.22;5653.122;5753.479;4994.887;5575.732;6319.989;5590.8…	0
20140904-PurClathDigest-1ug-01	MULTI	4	340.9794	1359.8885	34495.0390625	9	9	2	NaN	0.888477	0.222928142303317	3.440969	340.978641166364	9.51	9.03	0	754	764		-1		0				NaN	1522.8	0;468.9873;285.4012;1171.351;795.525;338.5544;546.7422;754.93;0;0;0	0
20140904-PurClathDigest-1ug-01	MULTI	1	340.99484	339.98756	35401.453125	11	8	2	NaN	0.987563	-0.208830918902834	4.376356	340.996141546616	9.543	8.2	0	756	765		-1		0				NaN	4135.2	0;1121.835;896.4952;1863.454;4030.121;1935.788;1281.842;1141.594;0;0	0
20140904-PurClathDigest-1ug-01	MULTI	1	340.99621	339.98894	NaN	6	4	2	NaN	0.988937	-0.207457575754177	4.174193	340.997104842463	9.919	4.465	0	783	788		-1		0				NaN	2181.6	0;439.5918;2126.147;882.4131;380.7144;0	0
20140904-PurClathDigest-1ug-01	MULTI	5	338.98813	1689.9043	NaN	5	4	2	NaN	0.90429	0.086933948209662	3.32731	338.987506916579	10.198	4.195	0	802	807		-1		0				NaN	1382.3	0;757.2212;756.0038;472.6645;0;0	0
20140904-PurClathDigest-1ug-01	MULTI	1	340.99103	339.98376	26176.658203125	5	3	2	NaN	0.983757	-0.212635768107532	4.191901	340.990588161471	10.271	3.52	0	807	811		-1		0				NaN	3524.2	0;2880.223;624.7659;2971.204;0	0
20140904-PurClathDigest-1ug-01	MULTI	1	339.03552	338.02824	36059.125	94	53	3	NaN	0.028241	-0.167252035919716	1.56922	339.037711578908	10.665	47.625	0	812	866		-1		0				NaN	8220	0;334.6036;3242.131;3757.568;3729.625;4760.424;5585.65;4449.627;8683.426;6617.819;5958.609;5447.588;6831.702;6127.736;7110.773;4459.978;5970.897;6212.081;3984.492;6025.226;6707.351;6834.029;4397.156;5771.879;5981.813;4221.543;4454.349;4681.957;4433.838;4883.954;4515.887;4704.792;3291.177;4567.668;3725.149;5730.339;5692.229;6717.923;4465.744;5561.869;4610.089;5499.864;5063.317;4820.313;4395.027;31…	0
20140904-PurClathDigest-1ug-01	MULTI	1	335.0584	334.05113	35811.23046875	57	39	2	NaN	0.051125	-0.142538494013877	3.810923	335.061586062295	10.198	35.965	0	784	824		-1		0				NaN	2483.2	0;280.1449;701.5418;1060.752;1419.963;757.7835;566.721;1169.73;1157.872;1131.455;2542.232;2934.277;2912.044;1086.152;1391.992;1676.687;1692.945;2141.871;1247.567;1595.411;1658.624;1721.836;2605.11;1597.299;2433.514;817.5544;2193.517;1715.875;1114.137;844.3094;1934.541;1656.317;1177.543;698.769;1225.099;874.3395;2029.416;0;0;0;0	0
20140904-PurClathDigest-1ug-01	MULTI	1	340.98296	339.97568	37554.48828125	6	4	2	NaN	0.975681	-0.220707460911967	4.078549	340.981010799485	10.693	4.525	0	835	840		-1		0				NaN	1851.3	0;1804.221;1942.57;2080.92;0;0	0
20140904-PurClathDigest-1ug-01	MULTI	1	340.99137	339.9841	21668.044921875	8	6	2	NaN	0.984097	-0.212295758573305	3.273626	340.989061501853	10.772	6.12	0	838	845		-1		0				NaN	4122.8	0;394.2712;1151.509;1908.746;1450.815;1759.555;2735.982;0	0
20140904-PurClathDigest-1ug-01	MULTI	1	341.00004	339.99276	NaN	4	2	2	NaN	0.992762	-0.203634818183446	3.830276	341.00248751424	10.966	2.695	0	855	858		-1		0				NaN	919.2	0;718.9005;895.8318;0	0
20140904-PurClathDigest-1ug-01	MULTI	7	340.90809	2379.3057	28627.728515625	9	5	2	NaN	0.305729	0.171248645061041	2.851211	341.051842049572	11.09	5.495	0	862	868		-1		0				NaN	2402.1	0;1159.526;1354.941;1057.597;1178.099;680.2906;0	0
20140904-PurClathDigest-1ug-01	MULTI	1	340.99365	339.98637	NaN	6	5	2	NaN	0.986374	-0.21002021913273	2.735736	340.993914801898	11.165	5.33	0	867	873		-1		0				NaN	3590.8	0;1024.588;1460.309;3499.5;989.9846;0;0	0
20140904-PurClathDigest-1ug-01	MULTI	1	336.03164	335.02437	NaN	8	7	2	NaN	0.024366	-0.169745162290894	3.643466	336.028631575458	11.273	6.76	0	874	882		-1		0				NaN	1111.1	0;346.4047;1082.868;911.3699;420.2523;508.8403;597.4283;0;0	0
20140904-PurClathDigest-1ug-01	MULTI	7	340.90711	2379.2988	32959.50390625	18	12	2	NaN	0.298837	0.16435997487406	3.01604	341.050371176969	11.282	10.855	0	871	884		-1		0				NaN	7429.6	0;1438.29;1209.467;1392.132;1380.856;2241.145;1083.723;1727.285;2329.507;1859.672;1382.631;1941.061;2371.809;0	0
20140904-PurClathDigest-1ug-01	MULTI	1	335.05816	334.05088	37253.265625	51	34	2	NaN	0.050883	-0.142779941848289	4.244297	335.061829767937	11.341	30.12	0	864	899		-1		0				NaN	1873	0;599.5332;548.2485;745.8849;583.1582;657.3827;723.9952;1090.795;1803.916;1436.057;1254.088;1259.317;1476.164;1702.177;1553.159;1072.235;1825.417;1728.221;2410.62;1559.153;1791.097;656.4333;1118.739;1114.411;1013.818;839.5158;1535.161;1489.21;870.5208;777.6541;373.1433;0;0;0;0;0	0
20140904-PurClathDigest-1ug-01	MULTI	1	339.03817	338.03089	35797.62109375	118	63	3	NaN	0.030889	-0.164605619714735	1.271282	339.037721009629	11.779	53.6	0	885	949		-1		0				NaN	8732.9	0;848.1351;1092.802;4712.025;5326.466;8237.939;7608.252;7267.16;6855.046;6961.971;5819.176;7627.948;7790.152;6691.458;5531.259;5690.824;7394.228;8623.246;7875.286;6321.927;5260.86;5388.251;4759.237;7105.545;8438.16;7354.497;8556.46;6939.235;5984.766;3712.947;5385.018;6865.581;6852.609;4695.949;6911.563;6521.125;5927.602;5171.687;7210.553;4596.935;8510.945;4899.609;5545.892;4212.147;5380.179;3711.…	0
20140904-PurClathDigest-1ug-01	MULTI	1	343.994	342.98672	36110.5	11	6	2	NaN	0.986721	-0.211053101749542	4.357265	343.99585443859	4.943	4.745	0	437	444		-1		0				NaN	5873	0;2170.645;5723.747;5136.552;2997.024;5299.202;2676.671;0	0
20140904-PurClathDigest-1ug-01	MULTI	1	343.99401	342.98674	36110.50390625	104	62	2	NaN	0.986737	-0.211036606325365	2.476059	343.995949946704	5.478	49.05	0	457	520		-1		0				NaN	5192.2	0;2149.146;2392.234;1914.676;2485.897;4243.395;2245.547;2676.531;3707.659;2305.244;3787.085;2459.799;4039.729;4109.743;3601.615;3451.708;2296.986;4836.021;2777.217;4875.146;3684.918;3916.67;4369.871;4373.677;3244.293;4523.703;3498.9;2921.903;3776.065;2441.602;3963.061;3681.666;2997.095;3931.939;4925.05;3973.656;3056.639;2634.447;3828.217;2893.984;3984.907;3420.358;4285.854;3706.263;3732.949;3110.…	0
20140904-PurClathDigest-1ug-01	MULTI	1	342.99486	341.98758	35672.45703125	276	169	3	NaN	0.987581	-0.209733039455443	0.690351	342.996502089707	6.997	153.25	0	520	692		-1		0				NaN	15643	0;1423.822;1264.619;8433.345;11945.65;10181.47;9445.06;9396.708;9993.243;9072.975;12095.57;10872.9;12631.72;13459;8880.604;11208.43;10376.02;9744.51;9060.881;8681.617;13166.66;9551.873;9989.981;9654.254;12156.06;9826.622;10010.89;9950.653;11850.54;10621.45;10104.91;12255.87;12851.55;12013.35;9738.933;9556.374;11627.94;12920.06;12527.89;10102.66;10035.91;12242.37;10075.07;11300.17;16286.67;11329.6…	0
20140904-PurClathDigest-1ug-01	MULTI	1	343.99311	342.98583	36110.41015625	83	47	2	NaN	0.985832	-0.211941049306063	2.897429	343.995589243433	7.267	43.425	0	588	638		-1		0				NaN	3581.7	0;599.1021;608.8671;2799.864;3860.911;2352.084;3988.313;3427.371;2484.27;2486.863;2448.775;3149.932;3213.706;2314.633;3297.874;3165.977;3220.224;2609.683;2417.301;1954.658;3022.71;3686.675;2205.893;2680.411;2753.633;3702.431;3560.082;1305.75;2672.592;3462.227;3150.173;2481.42;2849.045;1928.95;1840.428;2436.135;3490.623;3072.218;2841.57;1016.017;1527.728;1503.57;1098.61;990.8002;763.475;1108.389;1…	0
20140904-PurClathDigest-1ug-01	MULTI	1	343.99314	342.98587	36110.41015625	66	35	2	NaN	0.985867	-0.211906433082788	3.184793	343.995442265288	9.488	32.67	0	738	774		-1		0				NaN	2988.2	0;998.144;1386.826;1224.421;1891.866;2690.285;1766.86;1914.774;2477.977;2960.029;1467.405;1344.097;1609.096;2527.415;1987.396;2258.628;1826.45;2516.494;2250.441;1815.134;2430.156;2230.656;2258.563;2391.006;2108.301;2117.921;2004.29;705.2773;2149.348;2292.854;1675.447;2912.286;2317.645;2470.703;1788.258;0;0	0
20140904-PurClathDigest-1ug-01	MULTI	1	343.99349	342.98621	36110.44921875	84	60	2	NaN	0.986215	-0.211558771806722	2.367349	343.995608773254	7.96	56.08	0	630	691		-1		0				NaN	3558.4	0;927.1814;1481.204;1967.174;1421.652;1481.524;458.9111;1084.946;2109.094;2253.615;2863.611;1790.626;2789.143;2752.438;1961.406;2433.572;2044.662;2745.52;3462.217;2540.446;2710.738;2138.058;2746.771;2039.508;2085.332;1901.537;2757.88;2027.361;2949.726;3028.265;1950.024;3467.94;1289.8;1640.229;884.4685;1772.684;1477.355;1862.015;1760.1;2231.796;1588.283;1842.021;1805.596;1656.801;1032.11;1305.099;…	0
20140904-PurClathDigest-1ug-01	MULTI	1	342.99499	341.98771	35672.47265625	148	73	3	NaN	0.987714	-0.209600523303152	1.394205	342.996524322644	8.977	68	0	691	765		-1		0				NaN	13626	0;1276.036;7868.811;8215.833;7634.123;9085.975;8368.332;8001.554;10414.78;9339.814;10892.12;10132.73;10071.08;11990.75;10640.27;13342.54;6931.624;11077.86;12703.53;8546.405;8925.049;10018.83;10751.42;10221.95;12344.35;11400.55;7306.438;7124.593;8531.512;8521.965;9763.074;7429.06;12724.45;6811.107;6546.576;7264.049;10858.72;6826.84;9349.477;6239.386;7017.83;10312;6928.428;7348.161;7340.198;6705;80…	0
20140904-PurClathDigest-1ug-01	MULTI	1	342.99472	341.98744	35672.4453125	159	97	3	NaN	0.987443	-0.209871058019587	1.05722	342.996348511113	10.265	86.725	0	765	863		-1		0				NaN	15365	0;4956.436;4997.255;5773.9;8426.341;6002.594;5779.938;8707.604;7277.743;7460.032;8821.564;8478.367;9208.445;7806.652;8157.226;9072.012;10130.53;7228.476;8760.128;7145.546;10604.6;10153.87;12637.15;8733.767;8602.896;7467.648;9715.297;6572.665;7415.172;9773.431;7146.708;7070.844;6841.004;8977.547;8415.035;9098.954;7764.865;9019.156;8765.365;6061.554;7692.658;5598.192;7447.635;12101.73;7330.991;6541…	0
20140904-PurClathDigest-1ug-01	MULTI	1	343.99276	342.98548	36110.37109375	74	46	2	NaN	0.985483	-0.212290366623392	2.796225	343.995211650764	10.807	41.155	0	818	865		-1		0				NaN	3536.9	0;434.4395;696.3274;1791.752;1526.823;832.1765;2305.921;1668.801;1437.464;1375.581;1612.789;960.2318;704.4216;866.067;1956.602;1635.851;1329.678;1759.874;1309.934;1292.58;2349.006;2383.417;1353.206;2555.705;2790.717;2459.58;1868.084;2126.67;1983.402;4215.032;2554.956;3059.075;1492.585;1980.175;2096.296;3447.022;2064.173;2262.052;2172.607;2097.268;2846.649;1812.395;1839.913;2932.166;1682.884;1806.…	0
20140904-PurClathDigest-1ug-01	MULTI	1	342.99471	341.98743	35511.34375	173	98	3	NaN	0.987434	-0.209880629265854	1.162871	342.996416485252	11.825	83.195	0	863	962		-1		0				NaN	15800	0;6438.807;5483.326;5753.199;6918.229;6055.135;7111.395;8102.963;7804.474;5839.53;10284.48;6856.733;7226.948;6669.177;10124.21;6669.906;7864.059;10594.19;8059.084;12057.95;9468.48;8523.582;7345.932;6235.422;6617.539;8054.158;7465.385;11094.53;9818.781;7965.354;10385.63;9292.201;7293.386;10586.03;8609.785;8244.869;8886.897;10453.15;10314.07;11269.47;9632.695;7123.095;11521.53;8238.663;7787.986;908…	0
20140904-PurClathDigest-1ug-01	MULTI	1	343.99304	342.98577	36110.40234375	43	22	2	NaN	0.985767	-0.212006551208788	3.507947	343.995332446047	11.261	19.64	0	864	887		-1		0				NaN	4262.7	0;633.3544;2122.387;1257.226;2316.399;2335.028;2436.729;2452.54;1753.313;3069.783;2144.042;2256.535;2099.03;3544.481;2678.503;3331.891;3382.638;3085.221;3337.055;4154.38;3078.279;1200.55;2463.054;0	0
20140904-PurClathDigest-1ug-01	MULTI	7	340.90816	2379.3062	34701.28515625	20	18	2	NaN	0.306169	0.171688103870565	2.506928	341.051364611233	12.096	15.84	0	925	944		-1		0				NaN	8039.4	0;1187.742;399.6391;643.3421;476.7163;310.0905;669.9172;1469.813;723.8149;996.9525;1524.021;2308.455;1767.144;3152.972;2003.241;1104.429;1373.822;923.2092;0;0	0
20140904-PurClathDigest-1ug-01	MULTI	1	344.0106	343.00332	35090.421875	55	37	2	NaN	0.003322	-0.194459169264405	2.836779	344.012782130167	12.122	31.475	0	921	959		-1		0				NaN	3604.1	0;488.0321;1805.9;1252.848;3113.997;1760.153;2270.342;2599.613;2287.653;2375.688;2009.772;2049.765;3291.92;2535.809;4209.413;3651.086;2761.553;4152.832;3208.859;3272.209;2444.664;2531.564;2299.302;1451.329;2520.155;1713.325;2728.858;1452.189;735.2295;1913.083;2945.486;1872.893;1955.026;2438.491;2337.64;1795.858;1949.074;1754.039;0	0
20140904-PurClathDigest-1ug-01	MULTI	1	341.01552	340.00825	36557.9765625	1023	424	4	NaN	0.008247	-0.188156635197743	0.640007	341.017343320507	11.729	334.45	0	725	1154		-1		0				NaN	181890	0;65624.23;81760.41;62243.62;80475.5;75816.09;73385.16;87791.05;72919.01;85086.63;69353.39;69533.77;74309.1;69130.34;67157.84;67172.17;70566.55;66235.74;75820.7;76847.48;67875.12;83199.53;71792.04;79201.85;70728.5;77154.75;76484.83;78768.34;87859.63;73643.21;86320.88;87123.71;68974.94;92397.73;68419.26;79811.29;75033.06;75613.58;80430.41;69406.2;47683.41;69358.06;85090.06;94557.09;134567.5;90802.…	0
20140904-PurClathDigest-1ug-01	MULTI	1	344.01097	343.00369	35090.4609375	57	36	2	NaN	0.003691	-0.194090553052433	2.544794	344.012908368809	11.673	31.365	0	886	923		-1		0				NaN	3580	0;1951.53;2430.782;876.2498;1552.138;2182.863;2190.237;2461.057;1875.379;2620.055;2360.485;1781.094;2721.625;2686.605;2729.283;3360.716;3771.932;3362.61;2441.892;3936.523;3539.696;2730.194;2455.463;3785.48;2640.587;2809.761;3685.269;2395.566;2416.456;2844.129;2108.986;3531.61;2926.489;2128.68;1664.686;1590.476;2157.647;0	0
20140904-PurClathDigest-1ug-01	MULTI	1	340.99078	339.9835	19907.845703125	7	6	2	NaN	0.983499	-0.212893096702089	4.084406	340.990459671256	12.254	5.64	0	943	950		-1		0				NaN	5709.2	0;550.6331;482.0552;413.4773;2957.744;5564.097;729.9286;0	0
20140904-PurClathDigest-1ug-01	MULTI	1	339.03689	338.02962	36059.26953125	60	44	2	NaN	0.029618	-0.16587579997622	2.398345	339.0376620225	11.238	38.72	0	842	887		-1		0				NaN	11958	0;337.3392;456.0607;917.9293;774.1689;839.7275;881.6267;842.8313;956.4542;677.0289;779.4918;911.3379;1043.184;723.4249;570.6846;779.7137;643.0612;649.918;739.0852;776.1279;349.9334;974.9654;954.9175;727.9427;500.968;4416.111;4558.311;4769.578;6076.249;5832.209;4479.711;6683.995;3691.628;5322.222;6518.676;6635.675;7288.902;5529.787;8826.619;6870.421;11654.11;5901.486;6232.5;4316.665;5191.445;0	0
20140904-PurClathDigest-1ug-01	MULTI	1	344.01117	343.00389	34621.8359375	28	19	2	NaN	0.003891	-0.193890492227524	3.400075	344.012814840375	12.574	16.945	0	962	984		-1		0				NaN	4072.7	0;811.9052;1543.88;1420.577;2467.605;3484.039;2575.648;1376.947;2390.483;3289.435;3046.009;2158.486;650.4296;2471.531;2733.247;1573.869;3328.477;1326.543;1540.181;771.6211;0	0
20140904-PurClathDigest-1ug-01	MULTI	2	348.29661	694.57867	36155.1015625	8	5	2	NaN	0.578667	0.219161093015828	1.721769	348.296625883395	12.609	6.05	0	972	980		-1		0				NaN	126730	0;39028.52;117707;3424.681;498.5327;332.6906;0	1	974	0	0
20140904-PurClathDigest-1ug-01	MULTI	1	340.99102	339.98374	26605.41015625	5	3	2	NaN	0.983744	-0.212648550376855	3.334754	340.991041080001	12.688	3.26	0	979	983		-1		0				NaN	5260.4	0;3502.65;5126.667;1160.556;0	0
20140904-PurClathDigest-1ug-01	MULTI	2	348.29563	694.5767	37222.14453125	4	2	2	NaN	0.5767	0.217194892352722	2.082425	348.295590446538	12.717	2.365	0	981	984		-1		0				NaN	11608	0;2049.742;10781.88;0	0
20140904-PurClathDigest-1ug-01	MULTI	1	342.99522	341.98794	35178.10546875	84	36	3	NaN	0.98794	-0.209374167581757	2.070732	342.996488309888	12.679	29.735	0	961	1000		-1		0				NaN	16627	0;3344.603;5241.099;11189.21;8709.303;8764.384;9671.57;11783.76;9670.639;11603.9;10517.43;9138.389;11573.9;5171.654;9613.816;11196.91;9759.451;12872.75;12474.97;6207.177;16582.64;8587.425;8769.167;12474.27;9459.778;8661.71;16589.77;8229.662;6292.487;6334.634;7631.051;5248.822;9010.981;7445.737;3976.052;5621.241;5756.163;0	0
20140904-PurClathDigest-1ug-01	MULTI	7	340.908	2379.3051	NaN	14	10	2	NaN	0.305093	0.17061252540816	2.624472	341.051786238355	12.91	8.185	0	993	1004		-1		0				NaN	4322.6	0;1379.948;1264.558;757.6292;1225.736;1326.03;1522.447;1174.115;1459.507;361.0673;0;0	0
20140904-PurClathDigest-1ug-01	MULTI	1	340.98734	339.98006	28078.47265625	8	8	2	NaN	0.980063	-0.216327882311191	3.842338	340.984263255583	13.052	6.04	0	1004	1013		-1		0				NaN	6129.7	0;581.287;1399.907;2218.527;5009.594;4068.315;7024.402;1924.868;0;0	0
20140904-PurClathDigest-1ug-01	MULTI	1	335.0255	334.01823	35301.83984375	28	20	2	NaN	0.018226	-0.175421962763323	0.939241	335.025488309895	13.07	15.33	0	1000	1021		-1		0				NaN	17683	0;6298.401;6347.134;7520.616;7449.896;11929.61;7300.854;13330.79;9670.997;14216.77;11323.12;14186.05;11538.5;9522.631;6600.961;17234;15858.03;7193.049;15441.74;6116.803;9544.032;0	0
20140904-PurClathDigest-1ug-01	MULTI	1	345.97274	344.96547	36670.30078125	102	55	2	NaN	0.965468	-0.233215940962396	2.725734	345.975023954738	8.913	51.63	0	693	749		-1		0				NaN	6886.5	0;2942.183;4004.001;4271.28;3554.588;3534.736;4405.286;3694.061;5167.804;6711.452;5752.467;4267.357;3741.012;4124.869;4782.345;4548.677;4280.268;4161.978;3685.103;6069.406;5063.417;5061.344;5031.108;5625.848;3431.378;3327.013;3309.294;4445.505;6377.413;3958.243;6160.009;3446.912;3134.368;3463.418;4573.545;2747.747;4385.863;5291.125;3552.626;4114.287;3164.232;3641.464;3944.981;3146.366;4514.09;426…	0
20140904-PurClathDigest-1ug-01	MULTI	1	344.97424	343.96696	36192.390625	278	138	3	NaN	0.966959	-0.231266262208351	1.004529	344.975700763115	10.044	124.145	0	725	864		-1		0				NaN	29116	0;10454.13;14793.33;10385.76;13554.34;13750.62;11848.75;15258.66;12278.07;12166.26;10703.13;10806.79;12314.99;11350.99;10424.79;11663.69;10298.58;12119.83;12164.32;13568.62;11264.81;16196.91;13781.86;13780.83;12157.6;14455.67;15822.02;15374.31;19415.88;14357.44;17534.36;17264.61;13576.68;23689.22;14050.46;16620.62;15041.47;14936.47;18639.95;14022.67;6817.68;13702.13;12517.83;16091.89;23000.15;133…	0
20140904-PurClathDigest-1ug-01	MULTI	1	345.97248	344.96521	36670.2734375	94	48	2	NaN	0.965207	-0.233477467398245	2.4986	345.974841708127	10.733	43.08	0	816	865		-1		0				NaN	6384.4	0;2860.398;3735.758;3670.725;7163.439;5043.596;2829.213;3956.544;6294.729;4433.222;5146.26;3748.561;6078.709;4056.624;3071.34;4880.574;5764.346;6959.805;4955.032;5342.121;4123.866;4701.435;5470.628;4351.323;4029.707;6430.374;3736.398;5516.704;4902.435;5669.594;4031.633;6591.553;6037.195;6222.149;5447.544;5416;5355.683;6410.595;4599.858;6231.732;4560.878;3633.435;4606.688;5343.342;2982.158;4338.32…	0
20140904-PurClathDigest-1ug-01	MULTI	1	344.97412	343.96684	36192.37890625	81	37	3	NaN	0.966841	-0.23138383204838	3.385504	344.975711988538	11.267	32.825	0	863	901		-1		0				NaN	34190	0;1296.767;12692;14073.63;17383.88;18569.8;17866.09;23139.73;24394.9;16856.09;27432.27;15716.19;18186.85;18454.96;21930.34;20198.53;21621.33;25934.33;21138.04;34098.48;25808.51;23152.58;20617.96;19270.62;3549.831;1463.495;1618.259;2302.737;2330.105;1738.303;2079.903;2903.766;1152.611;3209.13;2213.718;1716.541;1815.446;1376.374;0	0
20140904-PurClathDigest-1ug-01	MULTI	1	345.97291	344.96564	36670.3203125	86	52	2	NaN	0.965637	-0.233047317693547	2.642254	345.974955824482	7.05	46.855	0	566	619		-1		0				NaN	10140	0;3332.213;3421.128;2873.255;3317.04;2997.909;2020.348;4100.544;3673.944;3613.857;4170.083;3877.521;2711.363;3678.111;4551.712;3056.055;3073.002;3318.582;5027.646;5396.205;6808.967;5978.455;5325.194;5369.514;6367.503;3882.211;6068.738;5412.463;9882.521;7773.27;6301.1;7800.917;6191.47;5797.016;5703.282;5125.06;6617.355;6327.044;5774.137;6123.114;5597.9;3524.338;5579.4;5178.612;4468.715;5187.118;48…	0
20140904-PurClathDigest-1ug-01	MULTI	1	345.97278	344.9655	36670.3046875	64	38	2	NaN	0.9655	-0.233184107911086	3.221404	345.974946726753	7.634	36.22	0	618	659		-1		0				NaN	8675.8	0;1982.613;4876.626;3911.651;6827.5;7091.099;5466.452;7691.067;7145.409;5197.662;8455.311;3760.856;5030.287;5050.011;4746.424;5154.932;4417.555;3663.952;4033.866;4303.356;5279.26;4048.611;5897.411;4541.14;5472.804;4783.705;3570.378;4514.894;2348.691;1430.503;1754.461;2116.668;2811.232;1946.311;1547.993;1939.398;1490.036;1906.951;1714.588;0	0
20140904-PurClathDigest-1ug-01	MULTI	1	345.97375	344.96647	36670.40625	185	119	2	NaN	0.966474	-0.232211024172841	1.972516	345.976037505577	1.617	79.35	0	99	219		-1		0				NaN	12391	0;4256.081;3966.148;8332.179;8823.977;8804.225;10458.32;10763.62;9502.399;9889.678;8820.929;12249.98;11531.59;7703.011;9962.02;9440.686;9092.674;9858.861;8591.741;8961.083;11064.35;7356.982;7436.868;7690.026;12598.29;9489.296;11918.88;10755.81;6972.491;9258.767;8496.003;8369.184;11987.07;9142.84;12076.09;10886.46;9683.031;9454.619;9873.873;9727.297;8593.059;6588.244;9629.121;9457.742;10262.32;106…	0
20140904-PurClathDigest-1ug-01	MULTI	1	340.99256	339.98528	26879.904296875	8	7	2	NaN	0.985283	-0.21111018926689	3.559772	340.992896173614	13.305	5.095	0	1029	1037		-1		0				NaN	6619.4	0;5409.84;4902.101;4324.769;2626.804;2059.302;1229.916;0;0	0
20140904-PurClathDigest-1ug-01	MULTI	1	335.05869	334.05141	35706.25	53	31	2	NaN	0.051411	-0.142252245541727	4.309919	335.062289062724	13.4	21.365	0	1024	1056		-1		0				NaN	5172.2	0;838.821;740.0272;2141.694;1749.191;3317.144;5040.681;2202.384;1712.906;2638.765;3823.699;3388.98;1056.397;4223.849;4141.463;3879.89;2959.76;2820.999;3519.096;1882.782;3091.702;4982.662;5012.568;3836.462;3215.678;4556.821;1561.016;2486.784;3059.919;852.2089;0;0;0	0
20140904-PurClathDigest-1ug-01	MULTI	7	340.90722	2379.2996	NaN	6	5	2	NaN	0.299624	0.16514613627669	2.593302	341.050284402622	13.529	3.68	0	1049	1055		-1		0				NaN	5932.5	0;1095.089;1010.629;926.1678;3346.325;713.4153;0	0
20140904-PurClathDigest-1ug-01	MULTI	1	345.97331	344.96604	34614.703125	16	9	2	NaN	0.966036	-0.232648507160491	4.376056	345.975540720716	13.521	6.155	0	1047	1057		-1		0				NaN	4684.7	0;3838.241;4515.325;2295.293;2777.652;4186.188;4865.756;3005.397;2958.604;0;0	0
20140904-PurClathDigest-1ug-01	MULTI	1	344.97496	343.96769	36110.140625	134	100	2	NaN	0.967688	-0.23053754212043	1.879774	344.975736697275	12.194	84.195	0	888	991		-1		0				NaN	34254	0;2282.841;3804.14;2733.027;2888.134;3826.227;2821.063;3461.055;3667.113;2818.143;2441.688;2458.551;2833.398;3497.631;2283.832;4235.338;2496.903;4071.21;2640.518;2516.115;2909.466;3982.154;3128.667;3629.118;3573.806;4053.723;2532.879;2619.224;6095.484;4000.77;3177.93;4387.001;2655.381;2101.057;3571.55;3784.911;2966.453;5194.189;2869.995;3968.316;16454.3;19467.89;16415.52;20170.47;21308.48;17519.8…	0
20140904-PurClathDigest-1ug-01	MULTI	1	344.97588	343.9686	36110.234375	422	247	2	NaN	0.968603	-0.229623035355985	0.610809	344.976592739038	4.565	175.835	0	273	521		-1		0				NaN	49029	0;17430.94;20733.32;17406.92;22256.27;20232.02;22445.64;24426.59;22926.27;25516.79;19236.46;19749.32;24408.8;18159.93;20624.09;19208.4;18126.5;19328.79;18437.21;22335.48;18688.26;21617.01;21290.85;18796.89;27639.73;23049.37;23516.84;26676.27;25089.55;22563.44;20879.79;22261.47;19952.13;23306.56;20776.2;19319.57;16682.63;20498.97;19829.84;19209.59;20040.11;23329.11;24537.21;25698.16;22600.12;19492…	0
20140904-PurClathDigest-1ug-01	MULTI	1	333.97721	332.96994	NaN	6	4	2	NaN	0.969937	-0.223229078344957	3.206367	333.976674094582	13.895	3.125	0	1086	1091		-1		0				NaN	3438	0;1829.125;3350.581;2430.358;0;0	0
20140904-PurClathDigest-1ug-01	MULTI	6	342.86018	2051.1174	NaN	4	2	2	NaN	0.117415	0.133901243562832	3.958304	343.027463977224	14.232	1.87	0	1119	1122		-1		0				NaN	3115.4	0;1562.853;1970.727;0	0
20140904-PurClathDigest-1ug-01	MULTI	1	344.97499	343.96771	35312.76953125	71	40	3	NaN	0.967713	-0.230512585061945	1.739804	344.976291320382	14.347	25.775	0	1113	1154		-1		0				NaN	19995	0;8118.875;9219.905;9714.232;14529.3;15746.41;12070.68;11036.44;12693.8;11891.65;11882.07;7920.806;9752.395;11235.03;9895.35;7655.177;6010.147;8634.474;11575.43;9705.396;8466.35;9466.672;11398.5;12335.22;8692.604;8882.47;19486.85;9746.367;9388.449;7980.787;10734.36;10124.16;9799.02;8167.156;9893.768;10229.28;10066.04;6442.517;0;0;0;0	0
20140904-PurClathDigest-1ug-01	MULTI	1	343.99239	342.98512	NaN	7	5	2	NaN	0.985116	-0.212657134434266	3.500604	343.994703710331	14.651	3.7	0	1158	1164		-1		0				NaN	2173.7	0;1776.522;2437.956;2795.663;2190.223;0;0	0
20140904-PurClathDigest-1ug-01	MULTI	1	345.97374	344.96646	36327.93359375	11	7	2	NaN	0.966462	-0.232222304567244	4.257017	345.975400403469	14.64	4.96	0	1156	1164		-1		0				NaN	5053.8	0;1065.516;3440.526;4925.333;2995.779;2443.445;2769.181;0;0	0
20140904-PurClathDigest-1ug-01	MULTI	7	340.90717	2379.2992	NaN	6	4	2	NaN	0.299247	0.164769008475105	4.304992	341.050185113959	14.817	3.185	0	1174	1179		-1		0				NaN	5379.9	0;826.0894;3034.627;2670.023;892.321;0	0
20140904-PurClathDigest-1ug-01	MULTI	1	345.97293	344.96566	36327.84765625	15	9	2	NaN	0.965658	-0.233026618418648	4.350421	345.975175973484	14.829	6.255	0	1173	1183		-1		0				NaN	4050.5	0;2067.878;2409.127;3060.086;2428.843;2811.674;3947.496;1980.37;1376.309;1515.641;0	0
20140904-PurClathDigest-1ug-01	MULTI	1	340.99766	339.99039	NaN	5	3	2	NaN	0.990389	-0.206007075422463	3.130474	340.997791195063	14.855	2.455	0	1178	1182		-1		0				NaN	2509.3	0;761.5322;2445.479;1623.418;0	0
20140904-PurClathDigest-1ug-01	MULTI	1	345.97303	344.96576	33450.9921875	23	16	2	NaN	0.965758	-0.232926383117842	3.88016	345.975420771476	15.003	10.56	0	1186	1203		-1		0				NaN	4528	0;1763.405;1833.103;2673.465;2064.098;2826.302;3283.748;4412.889;2800.736;3082.003;3866.856;3880.668;4540.398;705.7346;686.8817;958.5215;1206.624;0	0
20140904-PurClathDigest-1ug-01	MULTI	1	345.97293	344.96566	35564.73046875	23	16	2	NaN	0.965658	-0.233025704118916	4.305882	345.975680409235	15.25	10.71	0	1208	1225		-1		0				NaN	4265.4	0;3485.96;1239.885;3300.022;2502.271;879.5829;1551.064;1673.49;1594.245;3550.842;2658.68;3512.265;6103.696;3025.196;2688.123;2094.956;2548.281;0	0
20140904-PurClathDigest-1ug-01	MULTI	1	343.99346	342.98618	NaN	6	4	2	NaN	0.986185	-0.211589097976059	4.375923	343.994877091386	15.423	3.11	0	1232	1237		-1		0				NaN	3104.8	0;1090.398;2768.279;2946.355;2537.417;0	0
20140904-PurClathDigest-1ug-01	MULTI	1	335.05873	334.05145	37088.609375	25	17	2	NaN	0.051453	-0.142210230082924	4.232264	335.062399735638	15.478	11.285	0	1233	1251		-1		0				NaN	5194.6	0;1787.213;2045.828;4054.261;3916.487;5062.523;3846.712;3217.794;2402.804;1896.175;4205.146;867.8532;586.5594;2006.974;632.2596;1670.141;0;0;0	0
20140904-PurClathDigest-1ug-01	MULTI	1	335.05958	334.0523	37088.703125	57	43	2	NaN	0.052303	-0.141361483617914	4.219946	335.062194189879	15.256	27.535	0	1189	1233		-1		0				NaN	5886.9	0;758.4357;1926.161;1526.818;1127.475;1148.777;1582.765;1218.197;1315.153;2042.727;1750.027;1457.327;1267.005;2115.986;1829.04;1542.093;1286.642;1031.191;1065.718;2564.064;1994.085;937.7371;823.4595;3362.169;3281.784;2747.76;3186.61;3567.678;3243.253;3416.437;5519.671;1816.178;5737.263;4716.735;4736.847;3490.695;3120.213;2401.649;1793.282;2864.273;1742.255;2699.224;1384.299;0;0	0
20140904-PurClathDigest-1ug-01	MULTI	1	333.97683	332.96955	39426.484375	11	10	2	NaN	0.969554	-0.22361232213234	3.436313	333.976104014087	15.651	7.035	0	1252	1263		-1		0				NaN	2334.5	0;1473.441;2050.74;2275.112;1642.078;753.3804;827.7278;1353.345;1150.779;0;0;0	0
20140904-PurClathDigest-1ug-01	MULTI	1	344.01155	343.00428	38153.046875	8	6	2	NaN	0.004276	-0.193506318359027	3.954485	344.01352539461	15.717	4.53	0	1259	1266		-1		0				NaN	2278	0;1861.765;1140.856;717.1329;2138.127;1571.246;918.3301;0	0
20140904-PurClathDigest-1ug-01	MULTI	1	343.99337	342.98609	NaN	12	8	2	NaN	0.986089	-0.211684957611567	4.122489	343.995550268561	15.765	6.07	0	1262	1271		-1		0				NaN	2564.4	0;819.3669;1398.121;2166.915;2071.671;2266.874;1963.846;1254.266;397.2878;0	0
20140904-PurClathDigest-1ug-01	MULTI	1	344.01046	343.00318	29743.205078125	7	4	2	NaN	0.003185	-0.194596500154205	3.396206	344.01304936996	15.781	3.445	0	1266	1271		-1		0				NaN	3375.9	0;3812.202;3290.082;2493.41;644.5844;0	0
20140904-PurClathDigest-1ug-01	MULTI	1	340.0342	339.02692	37857.89453125	6	5	2	NaN	0.026925	-0.169027784256798	5.482273	340.037443433439	15.868	4.81	0	1272	1278		-1		0				NaN	1479.1	0;284.129;320.2867;1441.537;1723.491;0;0	0
20140904-PurClathDigest-1ug-01	MULTI	1	343.9935	342.98623	35276.72265625	15	9	2	NaN	0.986227	-0.211546336653896	4.294426	343.995447553214	15.886	8.325	0	1272	1282		-1		0				NaN	2920.1	0;1567.889;2264.397;2111.023;1457.231;2358.853;1585.401;963.2881;1871.459;479.5747;0	0
20140904-PurClathDigest-1ug-01	MULTI	1	332.99899	331.99171	36877.47265625	46	29	3	NaN	0.991715	-0.201001251982291	0.697988	332.998565253246	16.003	25.415	0	1270	1300		-1		0				NaN	14360	0;966.2896;8002.198;7321.666;13994.52;13645.18;8774.81;13945.13;10530.52;8037.746;13952.85;9012.367;11725.17;7605.576;9053.249;8636.07;10664.87;13154.14;12742.48;6680.072;9193.628;10768.8;9904.861;10500.2;7261.737;10338.82;12236.72;10981;8522.878;6623.28;0	0
20140904-PurClathDigest-1ug-01	MULTI	1	340.98061	339.97333	NaN	6	4	2	NaN	0.973331	-0.223056886755444	4.343036	340.981626176219	16.148	4.21	0	1292	1297		-1		0				NaN	1255.7	0;707.2047;1026.253;1136.673;753.1925;0	0
20140904-PurClathDigest-1ug-01	MULTI	1	335.05946	334.05218	37212.3515625	47	35	2	NaN	0.052181	-0.141482672438542	3.816178	335.061530732497	16.113	31.755	0	1274	1310		-1		0				NaN	2854	0;315.7782;793.0739;1203.22;675.4199;742.1584;800.0994;858.0403;694.4912;1474.034;605.1564;609.4637;891.0527;1358.168;2350.303;1205.104;1631.122;1699.234;1663.942;1079.262;1271.076;1383.166;1091.568;2781.427;1247.605;864.9286;574.7596;1440.649;1250.37;750.403;429.3493;431.5603;0;0;0;0;0	0
20140904-PurClathDigest-1ug-01	MULTI	1	340.98989	339.98262	31410.05859375	8	7	2	NaN	0.982616	-0.213775511763345	3.937897	340.989017302117	16.349	7.36	0	1305	1313		-1		0				NaN	1817	0;990.6085;1162.858;1770.793;519.6796;703.5527;887.4259;0;0	0
20140904-PurClathDigest-1ug-01	MULTI	4	340.98304	1359.9031	NaN	7	5	2	NaN	0.903053	0.237497921415752	3.838459	340.983567161865	16.463	5.41	0	1313	1319		-1		0				NaN	3086.9	0;1366.693;894.7688;1196.255;1590.094;0;0	0
20140904-PurClathDigest-1ug-01	MULTI	6	348.87514	2087.2072	NaN	6	5	2	NaN	0.207194	0.207079146315664	3.698866	349.041670447385	16.581	5.39	0	1321	1327		-1		0				NaN	1851.2	0;331.635;1105.594;1152.703;290.8359;0;0	0
20140904-PurClathDigest-1ug-01	MULTI	1	335.05976	334.05248	NaN	6	4	2	NaN	0.052482	-0.141182338860517	3.333538	335.061416329676	16.68	4.36	0	1328	1333		-1		0				NaN	1185.7	0;800.3631;670.1755;969.0481;387.0603;0	0
20140904-PurClathDigest-1ug-01	MULTI	4	340.98092	1359.8946	34295.27734375	5	3	2	NaN	0.894569	0.229017371889768	4.376345	340.981158749039	16.954	3.6	0	1346	1350		-1		0				NaN	2746.4	0;1048.978;2112.613;1210.192;0	0
20140904-PurClathDigest-1ug-01	MULTI	1	340.99534	339.98806	NaN	8	7	2	NaN	0.988065	-0.208329851018618	3.939005	340.996337430596	17.495	7.37	0	1380	1388		-1		0				NaN	3337.4	0;464.7896;445.4513;1904.264;3252.61;718.1378;455.0369;0;0	0
20140904-PurClathDigest-1ug-01	MULTI	1	343.99286	342.98559	38595.46484375	53	38	2	NaN	0.985588	-0.212184917805359	3.857556	343.995275431957	17.051	35.36	0	1335	1374		-1		0				NaN	3103.6	0;684.2496;651.8731;1045.522;359.5455;597.5978;627.8482;1103.374;585.6472;463.2053;1412.53;1484.026;2425.111;2200.555;1243.826;2508.729;2461.682;1846.881;2350.842;2537.369;3024.746;2111.131;1689.169;2425.785;2299.646;1822.325;2408.023;2878.235;1294.672;836.2036;409.6856;898.7404;1387.795;737.3776;831.5548;1017.279;0;0;0;0	0
20140904-PurClathDigest-1ug-01	MULTI	1	340.0416	339.03432	33004.28515625	25	16	2	NaN	0.034319	-0.161636430514761	3.40159	340.03653441885	17.501	15.96	0	1374	1391		-1		0				NaN	2867.8	0;594.2395;655.3767;734.7543;396.4195;686.8307;1150.219;2129.225;1203.094;2194.946;2225.76;2308.126;2794.871;2987.009;1557.4;2273.255;563.0191;0	0
20140904-PurClathDigest-1ug-01	MULTI	1	340.99185	339.98457	36800.8671875	7	5	2	NaN	0.984573	-0.211819474631056	3.906737	340.990547208712	17.87	5.77	0	1405	1411		-1		0				NaN	3387	0;3300.897;1139.717;1581.615;1510.756;0;0	0
20140904-PurClathDigest-1ug-01	MULTI	1	340.99157	339.98429	22468.169921875	6	5	2	NaN	0.984292	-0.212100963409227	8.487646	340.994098737726	17.98	5.735	0	1413	1419		-1		0				NaN	4075.6	0;3971.996;1914.021;229.6018;473.1693;0;0	0
20140904-PurClathDigest-1ug-01	MULTI	7	341.85254	2385.9169	NaN	6	5	2	NaN	0.916863	-0.220658628848014	2.952137	341.995548841163	18.129	5.765	0	1422	1428		-1		0				NaN	2102.2	0;1185.791;1142.367;502.7823;420.3178;0;0	0
20140904-PurClathDigest-1ug-01	MULTI	1	340.03377	339.0265	45140.828125	38	24	2	NaN	0.026495	-0.169456830228569	4.112134	340.036560052933	18.084	24.01	0	1408	1433		-1		0				NaN	2469.9	0;595.6945;359.7953;1060.583;938.9435;1152.895;983.2484;995.3607;2070.763;900.6494;1323.837;1039.669;1555.935;1757.348;1619.297;1110.924;1568.625;2407.14;966.3008;1359.281;906.6595;1513.227;1202.814;228.7252;0;0	0
20140904-PurClathDigest-1ug-01	MULTI	1	340.0336	339.02632	39844.72265625	42	25	2	NaN	0.026324	-0.169627905488312	3.98263	340.036224988362	18.433	25	0	1430	1456		-1		0				NaN	2799.5	0;626.4735;254.9288;1608.083;1586.83;1407.202;2728.3;1922.942;2159.446;1547.329;1472.649;929.6152;1332.802;1046.091;1251.709;1512.25;1150.03;2239.175;1952.992;1775.188;1249.067;2067.549;1506.972;0;0;0;0	0
20140904-PurClathDigest-1ug-01	MULTI	1	344.97394	343.96666	36222.953125	251	113	3	NaN	0.96666	-0.23156435433259	1.280131	344.975583557355	17.322	105.56	0	1317	1431		-1		0				NaN	27386	0;10978.16;12091.48;15706.23;12131.38;13850.12;15055.64;10977.1;13127.37;12622.26;15668.4;16070.59;13707.04;13702.79;13416.92;11235.24;15254.98;10939.66;10689.28;12497.05;14772.64;14942.18;12768.89;11834.44;13389.56;11904.07;10782.67;11422.46;13817;15084.01;19341.78;29135.89;16953.73;18971.39;16383.12;14833.94;15811.86;23406.74;21535.34;19394;21511.34;15894.94;23142.37;21543.14;20970.08;25474.99;…	0
20140904-PurClathDigest-1ug-01	MULTI	1	344.01158	343.0043	35915.671875	168	113	2	NaN	0.004304	-0.193477582667981	1.304511	344.012942528898	18.759	101.66	0	1404	1518		-1		0				NaN	5342.4	0;1193.295;1599.27;1374.648;1614.904;1790.227;1441.968;1141.192;1605.075;1844.313;1560.196;1497.398;1232.248;1787.027;1310.354;1875.189;1408.671;1262.125;2740.181;1808.926;2101.948;2758.973;1826.74;2086.628;2152.064;3204.441;2642.142;2033.201;1950.73;2142.322;1844.189;1328.881;2661.946;2507.243;2195.463;2429.748;2422.491;2340.62;1949.429;1856.314;2635.676;2284.746;2099.452;2948.643;2641.406;2677.…	0
20140904-PurClathDigest-1ug-01	MULTI	1	340.98795	339.98068	41592.14453125	6	5	2	NaN	0.980678	-0.215713205437908	6.431082	340.985150164023	19.042	5.005	0	1478	1484		-1		0				NaN	3768	0;228.0692;808.3571;1388.645;3197.74;2846.784;0	0
20140904-PurClathDigest-1ug-01	MULTI	1	341.04921	340.04193	32896.734375	9	6	2	NaN	0.041933	-0.154486384614074	3.919699	341.050138484767	19.464	5.55	0	1512	1519		-1		0				NaN	2709.2	0;1798.711;2664.699;2271.618;2640.308;775.2675;704.594;0	0
20140904-PurClathDigest-1ug-01	MULTI	1	340.98609	339.97882	28382.6328125	5	3	2	NaN	0.978815	-0.217574985224928	2.7478	340.986112379834	19.5	3.135	0	1516	1520		-1		0				NaN	3098.1	0;3019.384;2082.909;1010.279;0	0
20140904-PurClathDigest-1ug-01	MULTI	1	340.99046	339.98319	28017.294921875	7	5	2	NaN	0.983187	-0.213205367206569	4.193906	340.991142753334	19.789	4.585	0	1538	1544		-1		0				NaN	4206.1	0;4099.19;3851.148;3603.107;916.1085;0;0	0
20140904-PurClathDigest-1ug-01	MULTI	1	340.98762	339.98034	31695.9453125	16	10	2	NaN	0.980341	-0.216049809154299	4.085637	340.986111658988	19.886	8.05	0	1543	1554		-1		0				NaN	6297	0;562.6292;1974.92;4404.541;4198.119;3874.566;3137.594;3942.044;5513.807;5146.284;0;0	0
20140904-PurClathDigest-1ug-01	MULTI	1	345.00848	344.0012	35243.234375	41	22	2	NaN	0.001199	-0.197041486093553	3.604129	345.010680357589	19.424	17.12	0	1500	1523		-1		0				NaN	2883.2	0;1676.519;2912.299;1535.65;2172.76;2809.871;2116.836;1418.226;2089.331;1280.246;2270.82;2235.273;2014.684;2196.052;3042.295;3175.084;1338.98;1672.95;2070.042;3453.543;1410.643;2053.628;0;0	0
20140904-PurClathDigest-1ug-01	MULTI	4	340.98285	1359.9023	22798.994140625	6	5	2	NaN	0.902314	0.236758857356335	3.769158	340.983031250427	20.307	3.875	0	1584	1590		-1		0				NaN	8957.9	0;6890.623;2220.5;722.5883;796.0546;0;0	0
20140904-PurClathDigest-1ug-01	MULTI	1	340.98632	339.97904	30062.392578125	6	4	2	NaN	0.97904	-0.217350617832778	2.939298	340.985939037662	20.348	3.325	0	1587	1592		-1		0				NaN	4960.3	0;4834.25;5147.577;4377.766;0;0	0
20140904-PurClathDigest-1ug-01	MULTI	1	340.99023	339.98296	30062.73828125	7	5	2	NaN	0.982955	-0.213436901553905	4.102244	340.988784394871	20.383	4.01	0	1590	1596		-1		0				NaN	7703	0;3014.786;7507.205;3974.315;649.7829;1366.23;0	0
20140904-PurClathDigest-1ug-01	MULTI	1	343.99319	342.98591	37402.5234375	28	16	2	NaN	0.985913	-0.211860529169257	3.988596	343.995154498505	17.663	16.025	0	1386	1403		-1		0				NaN	1942.6	0;1415.097;813.5779;1737.61;1436.954;2239.199;1762.808;1522.614;1893.184;1785.873;2090.087;1223.488;1916.501;1996.019;2167.939;715.4756;1298.859;0	0
20140904-PurClathDigest-1ug-01	MULTI	1	343.99289	342.98561	37402.4921875	30	21	2	NaN	0.985611	-0.212162705351261	3.495717	343.995047480583	17.975	21.08	0	1402	1424		-1		0				NaN	2394	0;622.9164;1598.378;574.6135;1076.762;1322.58;1289.18;1956.525;845.4893;1650.6;1815.48;1707.673;1871.917;2223.178;2496.789;2531.205;1613.921;2450.343;1193.613;1174.117;1739.94;989.9381;0	0
20140904-PurClathDigest-1ug-01	MULTI	1	343.99327	342.98599	37402.53125	94	74	2	NaN	0.985994	-0.21177906607852	2.463518	343.995413377364	18.877	68.31	0	1423	1498		-1		0				NaN	3722.1	0;512.7223;1189.979;1784.356;1245.283;755.5898;691.8633;1063.303;883.6662;1247.875;1010.359;1644.317;953.1453;1524.694;1840.313;1575.467;1543.846;1034.414;1366.917;1212.538;1087.585;1268.444;1553.953;1797.165;1924.173;937.2687;1332.688;1535.42;1784.082;1350.882;1794.499;1430.689;1067.863;1411.781;978.1999;1066.387;1302.909;1892.385;1382.506;1401.338;1279.62;2062.607;1363.711;2069.519;1755.227;144…	0
20140904-PurClathDigest-1ug-01	MULTI	1	343.99403	342.98676	37402.6171875	77	54	2	NaN	0.986757	-0.211017264537588	2.587715	343.99601104167	19.542	41.48	0	1493	1548		-1		0				NaN	4862.8	0;2932.599;2356.084;1910.537;1034.05;1894.799;1890.429;2372.775;1246.403;1753.595;1078.658;2710.421;2348.957;2243.125;2187.393;2904.819;2387.627;1870.436;2242.096;4517.823;2246.149;2989.152;4739.146;2531.841;3145.424;3341.794;4584.155;4398.448;3519.269;3554.422;2362.155;3938.945;3236.032;3387.36;3465.695;3116.646;3592.856;2722.29;3777.531;2823.532;3083.254;2315.285;2761.517;1851.305;1714.5;1850.4…	0
20140904-PurClathDigest-1ug-01	MULTI	1	343.99427	342.98699	37402.640625	58	37	2	NaN	0.98699	-0.21078418958831	2.847438	343.996193573021	20.145	26.22	0	1548	1586		-1		0				NaN	5747.7	0;1407.686;2359;1285.056;1822.64;2872.033;1116.312;2387.989;1206.467;1790.034;2483.667;1894.547;1861.72;4697.385;1134.154;2433.943;1743.185;2729.273;2661.376;4485.78;2733.88;3908.97;3420.036;5606.653;3082.873;4461.604;3651.717;3777.333;2731.161;3162.337;5810.038;3771.624;3709.549;3893.552;4845.12;4384.8;5731.127;4756.571;0	0
20140904-PurClathDigest-1ug-01	MULTI	4	344.66732	1374.6402	35294.51171875	24	14	3	NaN	0.640185	-0.0321497665065635	1.325936	344.667331005846	20.643	24.95	0	1606	1656		-1		0				NaN	22040	0;706.5643;951.9722;1197.38;4911.078;7516.841;6885.665;12294.2;8459.899;20373.28;3883.364;1392.447;2071.313;2348.851;0;0	0
20140904-PurClathDigest-1ug-01	MULTI	3	336.50592	1006.4959	36221.53515625	8	5	2	NaN	0.495928	-0.00705996070212223	0.938648	336.505917685712	20.772	17.775	0	1618	1656		-1		0				NaN	26595	0;967.7828;12048.75;23355.78;4361.738;1735.648;0	0
20140904-PurClathDigest-1ug-01	MULTI	3	340.18554	1017.5348	35472.03515625	7	3	3	NaN	0.534795	0.0267286331610421	1.774199	340.18551571925	20.791	14.504	0	1624	1656		-1		0				NaN	66017	0;64261.21;9671.212;1290.266;0	0
20140904-PurClathDigest-1ug-01	MULTI	2	343.20264	684.39072	34112.390625	5	3	2	NaN	0.390718	0.0358982058440915	4.160224	343.203372314773	20.805	12.41	0	1621	1648		-1		0				NaN	10367	0;2794.24;8434.117;9628.49;0	0
20140904-PurClathDigest-1ug-01	MULTI	2	338.2064	674.39824	36317.3828125	74	62	3	NaN	0.398244	0.0480207418054306	1.003799	338.206356176465	20.836	71.88	0	1573	1700		-1		0				NaN	235650	0;650.2236;1491.8;988.0197;3408.614;969.504;3594.424;2298.565;2375.719;1451.126;3248.67;3014.691;2276.867;1539.044;3015.074;1701.428;1948.895;3290.645;3585.728;2380.632;1737.394;2821.795;2625.399;2429.004;1526.2;4278.546;851.8136;2594.001;2236.485;3435.787;3426.773;4187.938;1828.209;3700.146;2295.714;807.6927;3920.982;3052.057;4262.537;2367.04;4163.868;3583.564;7498.787;6846.527;11629.84;90332.28…	1	1641	0	0
20140904-PurClathDigest-1ug-01	MULTI	4	346.69265	1382.7415	35347.37890625	20	14	2	NaN	0.741508	0.0654472637770596	2.267507	346.692444633425	20.879	35.769	0	1624	1694		-1		0				NaN	746720	0;162313.4;27699.98;32437.31;16032.63;16339.21;7157.768;7383.549;4658.595;3451.323;4900.565;5164.243;3736.135;2822.915;4691.213;0	1	1636	0	0
20140904-PurClathDigest-1ug-01	MULTI	3	343.18564	1026.5351	36329.21875	105	51	4	NaN	0.535091	0.0228848750477937	0.925235	343.185631147593	21.095	66.404	0	1624	1744		1967	KEPDDAKPK	9	Unmodified	_KEPDDAKPK_	F1MSQ6	64.3270263671875	294780	0;16159.2;293048.5;127597.5;53371.62;24744.06;26847.62;14217.11;12553.33;18179.81;14423.13;13310.44;10078.48;15400.52;12164.97;7917.763;10142.56;11002.88;9046.029;10114.51;8058.958;10563.5;12537.99;7715.973;7884.104;10283.65;11012.56;11142.7;7107.765;7194.479;7113.35;5606.606;7025.231;7439.402;9850.018;9393.658;7346.525;6074.456;7265.347;6560.95;4542.244;3539.921;8612.295;6003.934;5643.375;5152.8…	1	1642	0	0
20140904-PurClathDigest-1ug-01	MULTI	3	345.18135	1032.5222	35584.54296875	7	3	3	NaN	0.522222	0.00726181839900164	1.924035	345.181502234345	20.889	15.455	0	1632	1664		-1		0				NaN	17007	0;12025.98;16479.59;2615.444;0	0
20140904-PurClathDigest-1ug-01	MULTI	4	350.69164	1398.7374	31245.775390625	14	8	3	NaN	0.737441	0.0540217867728643	0.870706	350.691673391797	20.963	26.894	0	1632	1683		-1		0				NaN	19627	0;8480.286;15097.88;10823.58;2524.025;6566.622;805.2217;911.7184;1724.287;0	0
20140904-PurClathDigest-1ug-01	MULTI	3	334.83199	1001.4741	NaN	6	4	2	NaN	0.474126	-0.0265519569810522	2.913523	334.832098774557	21.001	18.97	0	1640	1678		-1		0				NaN	4182	0;2287.536;3672.603;3016.783;1810.208;0	0
20140904-PurClathDigest-1ug-01	MULTI	3	349.17746	1044.5105	35146.13671875	26	20	2	NaN	0.510543	-0.0099319644471052	1.199364	349.177352631572	20.932	42.925	0	1618	1700		-1		0				NaN	264880	0;504.3909;2705.274;29660.22;229156.3;60851.09;147279.7;43870.34;17715.55;6872.841;6015.616;11562.41;3164.677;5339.878;1872.067;4969.779;2098.471;2630.266;2428.202;1759.042;1938.3;0	1	1645	0	0
20140904-PurClathDigest-1ug-01	MULTI	3	343.84679	1028.5185	24474.439453125	7	5	2	NaN	0.518546	0.005427707497347	2.671802	343.846288775359	21.134	15.31	0	1656	1683		-1		0				NaN	16104	0;4864.491;9313.025;4179.393;8873.623;6344.74;0	0
20140904-PurClathDigest-1ug-01	MULTI	3	339.84527	1016.514	33907.3671875	15	13	2	NaN	0.513994	0.00639774811304505	2.160029	339.845706120317	21.173	24.245	0	1656	1699		-1		0				NaN	12902	0;2180.002;9689.271;9854.219;2340.843;5536.274;4712.937;3271.158;1460.235;2040.071;2619.907;1238.235;1183.079;0;0	0
20140904-PurClathDigest-1ug-01	MULTI	5	340.99404	1699.9338	NaN	4	2	2	NaN	0.933824	0.11185433667174	4.064569	340.994410970714	21.167	6.675	0	1672	1682		-1		0				NaN	4768.1	0;1398.62;3329.411;0	0
20140904-PurClathDigest-1ug-01	MULTI	3	349.84934	1046.5262	34294.3984375	126	63	4	NaN	0.526189	0.00478721723857234	0.610603	349.849345257766	21.19	68.374	0	1640	1758		-1		0				NaN	433010	0;60133.71;96540.2;240209.8;430466.5;215829.6;208379.1;174854.4;178743.9;107347;82078.16;63506.62;59325.08;32153.16;32858.82;36647.34;17811.98;19825.14;16583.68;13566.45;12142.62;11268.05;16069.2;8019.503;10531.71;7449.047;8239.537;9294.719;7383.241;5836.664;4191.332;11701.46;5058.508;2151.042;7423.932;5380.694;1174.174;3045.029;3038.24;4525.841;905.4293;1401.73;2556.184;5485.095;2685.901;2016.55…	1	1666	0	0
20140904-PurClathDigest-1ug-01	MULTI	3	348.83084	1043.4707	37368.62890625	23	13	2	NaN	0.470701	-0.0492959231316945	1.379455	348.830794790754	21.212	24.245	0	1656	1699		-1		0				NaN	14899	0;3202.678;9306.153;12890.14;10675.67;11210.05;10377.81;9158.164;8035.637;9498.379;6984.021;4648.802;4863.495;2488.925;0	0
20140904-PurClathDigest-1ug-01	MULTI	1	340.98931	339.98204	NaN	5	3	2	NaN	0.982035	-0.214356541457278	2.851784	340.988933155872	21.374	2.789	0	1699	1703		-1		0				NaN	3547.7	0;3457.5;2055.999;1643.362;0	0
20140904-PurClathDigest-1ug-01	MULTI	3	348.83078	1043.4705	NaN	4	2	2	NaN	0.470505	-0.0494913531961174	3.693181	348.830889408042	21.383	1.885	0	1700	1703		-1		0				NaN	3023.9	0;1951.076;2616.133;0	0
20140904-PurClathDigest-1ug-01	MULTI	4	346.18944	1380.7287	39483.92578125	8	5	2	NaN	0.728653	0.0535175357297248	2.958089	346.189220023067	21.45	5.195	0	1704	1713		-1		0				NaN	4703.4	0;2032.18;2097.955;2438.543;3230.095;750.9202;0	0
20140904-PurClathDigest-1ug-01	MULTI	3	349.17789	1044.5118	33503.90234375	16	16	2	NaN	0.511835	-0.00864051341727645	1.305095	349.177877383276	21.478	13.505	0	1700	1722		-1		0				NaN	9680	0;1168.443;3761.311;1411.3;3372.56;5333.82;1398.651;1833.669;3568.321;3877.834;4266.513;4655.191;1930.439;0;0;0;0;0	0
20140904-PurClathDigest-1ug-01	MULTI	1	340.99143	339.98416	34154.796875	8	6	2	NaN	0.984156	-0.212236925712318	3.673952	340.989331643527	21.517	6.135	0	1708	1718		-1		0				NaN	4340.3	0;1263.042;2206.082;4229.942;2707.282;3007.218;0;0	0
20140904-PurClathDigest-1ug-01	MULTI	2	346.65934	691.30412	34952.5546875	60	41	2	NaN	0.304123	-0.0538772112261086	0.615543	346.65925427064	21.343	57.939	0	1624	1730		-1		0				NaN	18449	0;1935.735;4053.733;7210.181;13076.89;8634.825;9566.908;6349.977;11018.86;9681.325;10345.76;10540.86;10340.53;12573.69;13129.15;8507.15;17135.32;11269.46;13372.85;13236.88;13509.73;9634.541;12330.29;11459.14;10869.93;7524.149;13028.3;7944.636;7946.081;7227.275;10442.01;7433.75;10208.89;5051.54;5303.722;4554.472;5680.199;2251.886;2062.131;3547.385;4008.919;3022.948;0	0
20140904-PurClathDigest-1ug-01	MULTI	4	336.92197	1343.6588	36377.27734375	200	81	3	NaN	0.658764	0.000680777744946681	0.584343	336.921906154947	21.609	78.49	0	1648	1781		-1		0				NaN	41729	0;2154.696;5993.345;15069.59;14624.08;8619.557;12481.78;16601.07;14240.94;19838.74;26384.43;26573.85;23407.17;27884.46;35045.37;21048.77;25172.07;25270.54;26763.29;24356.85;26655.26;32302.63;29078.49;38572.94;25046.71;23320.54;21605.59;32538.31;17960.31;33472.73;34524.45;23827.61;32855.62;29886.27;18560.05;26334.84;21178.26;20719.21;25680;29141.16;30158.32;22199.15;29071.53;30950.76;19783.34;1507…	1	1696	0	0
20140904-PurClathDigest-1ug-01	MULTI	1	349.17996	348.17268	NaN	15	16	2	NaN	0.172682	-0.0274775064482924	3.435858	349.179036368602	21.793	12.81	0	1733	1754		-1		0				NaN	3909.7	0;1821.893;970.037;1132.279;3810.306;4192.93;4492.639;1597.358;1151.493;705.6288;708.6985;711.7683;939.4017;0;0;0;0;0	0
20140904-PurClathDigest-1ug-01	MULTI	1	340.99103	339.98375	31791.96484375	5	3	2	NaN	0.98375	-0.212642334332941	4.165659	340.991668235025	22.057	2.75	0	1766	1771		-1		0				NaN	11131	0;2157.475;10847.98;3054.065;0	0
20140904-PurClathDigest-1ug-01	MULTI	1	340.9888	339.98152	22195.71484375	6	4	2	NaN	0.981519	-0.214872679614587	4.246344	340.987925430637	22.151	3.105	0	1774	1779		-1		0				NaN	7020.8	0;2936.501;1469.967;3809.754;6842.379;0	0
20140904-PurClathDigest-1ug-01	MULTI	1	340.97921	339.97194	NaN	5	4	2	NaN	0.971936	-0.224450665873803	3.623375	340.977710284995	22.166	3.1	0	1776	1781		-1		0				NaN	3138.4	0;2564.897;1841.885;2045.183;930.7665;0	0
20140904-PurClathDigest-1ug-01	MULTI	3	343.18618	1026.5367	36148.3671875	38	26	2	NaN	0.536701	0.0244937269744696	1.268664	343.18610255541	22.178	17.835	0	1766	1795		-1		0				NaN	7841.8	0;680.0368;1643.585;3665.168;2255.403;5371.61;5885.378;2624.346;5113.059;3103.743;5099.269;2431.876;3522.596;3662.537;3320.093;3858.113;2851.505;3499.131;2604.649;2590.719;1940.229;2861.432;915.6798;2429.691;1622.956;1615.439;2107.786;0	0
20140904-PurClathDigest-1ug-01	MULTI	3	343.18578	1026.5355	36085.17578125	5	3	2	NaN	0.535502	0.0232957188777618	2.581107	343.520443259685	22.351	2.48	0	1795	1799		-1		0				NaN	3996.7	0;3457.67;2815.624;1329.479;0	0
20140904-PurClathDigest-1ug-01	MULTI	3	339.87008	1016.5884	35470.62109375	303	170	3	NaN	0.588406	0.0807753042364538	0.403954	339.870058063701	21.872	123.284	0	1678	1877		-1		0				NaN	89652	0;958.9493;940.2604;5856.323;11755.97;12999.72;15558.09;27721.59;22706.14;31824.85;40963.91;36429.59;40994.67;40694.64;49520.56;47336.23;55531.32;65625.8;47426.48;45514.04;51262.82;49617.14;48925.2;67713.19;61381.53;55184.48;66524.59;74789.42;60307.95;74371.2;62551.52;49639.03;55089.32;66453.39;61991.37;80522.74;62686.65;64359.46;87267.15;71724.13;55657.62;59904.69;50291.04;44669.9;42424.04;56578…	0
20140904-PurClathDigest-1ug-01	MULTI	4	336.92212	1343.6594	36330.4765625	31	23	2	NaN	0.659356	0.00127239041285065	1.21467	336.922283407384	22.609	14.91	0	1811	1835		-1		0				NaN	11101	0;1754.291;1080.611;2977.988;4525.67;4839.381;2643.549;4625.64;4735.006;6800.425;6999.419;4078.501;2873.517;6053.094;2436.207;1369.182;2682.679;3996.175;2595.572;2893.044;4560.32;1753.375;0;0;0	0
20140904-PurClathDigest-1ug-01	MULTI	4	336.92224	1343.6598	36330.48828125	56	31	2	NaN	0.659846	0.00176201792510255	0.695396	336.922266712054	22.325	20.46	0	1781	1814		-1		0				NaN	21407	0;4361.428;9108.07;16466.81;12403.52;11931.59;7208.622;13786.96;7587.714;5641.979;4388.61;10257.66;11127.03;8418.43;5788.525;6040.099;10005.55;5195.768;12286.88;4017.486;9751.355;4876.625;2502.083;3573.732;5845.773;4993.245;3520.132;7497.233;3749.883;0;0;0;0	0
20140904-PurClathDigest-1ug-01	MULTI	3	340.20462	1017.592	35434.36328125	42	27	2	NaN	0.592032	0.0839399103815595	0.753281	340.204586722339	22.537	17.47	0	1802	1830		-1		0				NaN	18385	0;3649.117;10530.34;6542.213;7248.081;10884.72;9528.347;7038.966;9460.021;6379.719;7415.563;6089.691;5244.677;7056.925;7105.547;7483.996;5884.824;8167.855;8707.752;5766.287;2904.1;3508.675;6523.446;5090.282;3549.595;4438.216;1271.332;3179.583;0	0
20140904-PurClathDigest-1ug-01	MULTI	1	343.99433	342.98705	36617.5	43	27	2	NaN	0.987052	-0.210722221945218	3.671321	343.996764541752	22.652	18.01	0	1812	1841		-1		0				NaN	4378.1	0;2184.745;1960.217;2127.403;2127.378;2914.915;2709.678;3176.699;4741.39;3945.608;5140.458;4370.063;3894.944;3445.743;3708.2;4389.733;4677.58;5546.381;3558.588;3310.43;3044.235;2657.025;1291.334;2109.635;2927.936;3578.083;2465.535;0;0	0
20140904-PurClathDigest-1ug-01	MULTI	4	340.98068	1359.8936	37550.84375	5	3	2	NaN	0.893606	0.228054897786706	4.362573	340.979964961775	22.84	3.12	0	1841	1846		-1		0				NaN	5110.6	0;2581.502;3931.235;1443.887;0	0
20140904-PurClathDigest-1ug-01	MULTI	4	336.92212	1343.6594	37481.125	13	10	2	NaN	0.659356	0.00127265244873342	0.996623	336.922092063724	22.803	8.125	0	1835	1848		-1		0				NaN	9730.3	0;1340.039;3638.303;7484.791;3817.401;3860.306;3212.554;1831.682;1586.588;0;0;0	0
20140904-PurClathDigest-1ug-01	MULTI	1	340.99229	339.98501	26723.150390625	6	4	2	NaN	0.985015	-0.211378406903179	4.372452	340.993790429392	22.853	3.47	0	1843	1848		-1		0				NaN	5567.8	0;7025.556;4641.295;5033.767;0;0	0
20140904-PurClathDigest-1ug-01	MULTI	4	340.98027	1359.892	NaN	7	4	2	NaN	0.891983	0.226432607520564	4.339078	340.979371904112	23.016	3.16	0	1858	1863		-1		0				NaN	4194.5	0;1258.736;3226.51;2062.14;2314.455;0	0
20140904-PurClathDigest-1ug-01	MULTI	1	340.99394	339.98667	24755.7734375	6	4	2	NaN	0.986668	-0.209725874706294	3.748979	340.993131062471	23.087	3.165	0	1865	1870		-1		0				NaN	4927.9	0;4027.359;2106.369;3508.173;2845.344;0	0
20140904-PurClathDigest-1ug-01	MULTI	1	344.01257	343.00529	38956.0546875	40	30	2	NaN	0.005289	-0.192493454652038	2.707309	344.014181675398	23.119	20.275	0	1857	1889		-1		0				NaN	5219.7	0;1309.872;2235.321;4265.916;2846.057;3375.015;4663.983;5512.09;5325.174;3532.189;5983.522;3227.372;3929.476;3812.269;3621.119;2285.547;2970.987;3287.279;1667.56;1432.397;2484.137;3446.236;3856.407;2877.667;3346.307;2211.334;2546.104;2323.48;1622.878;2941.982;2898.908;0	0
20140904-PurClathDigest-1ug-01	MULTI	1	340.98957	339.9823	24899.326171875	5	3	2	NaN	0.982296	-0.214095519428383	4.268651	340.988597413992	23.185	2.57	0	1875	1879		-1		0				NaN	7634.5	0;5512.856;7440.416;796.5083;0	0
20140904-PurClathDigest-1ug-01	MULTI	1	343.99469	342.98741	34968.33203125	63	44	2	NaN	0.987411	-0.210363234426154	2.903711	343.996844096364	23.08	29.405	0	1843	1889		-1		0				NaN	4509.3	0;960.7333;2430.167;2189.959;3476.798;1222.864;3245.969;2811.386;1920.514;2512.556;1763.259;3685.251;2430.271;1848.18;1528.004;2921.873;4734.427;1757.29;2647.493;2605.991;3638.779;5858.785;3958.721;4392.382;3179.217;5260.24;5728.387;4462.202;4503.009;3025.462;4520.908;3590.734;3617.582;3730.966;4319.938;3053.384;2936.411;2096.209;1399.232;871.822;3515.314;2872.97;766.3228;2714.559;0;0	0
20140904-PurClathDigest-1ug-01	MULTI	1	340.98891	339.98163	22718.916015625	5	3	2	NaN	0.981633	-0.214758440307548	4.087329	340.98931347107	23.249	2.58	0	1880	1884		-1		0				NaN	7183.9	0;930.8532;1868.284;7001.339;0	0
20140904-PurClathDigest-1ug-01	MULTI	2	343.68722	685.3599	35685.44140625	6	4	2	NaN	0.359897	0.00463138466102464	2.070503	343.686923162239	23.262	3.771	0	1881	1887		-1		0				NaN	4574.7	0;2304.551;1708.253;712.1707;3084.363;0	0
20140904-PurClathDigest-1ug-01	MULTI	1	343.99488	342.9876	35312.62109375	21	13	2	NaN	0.987604	-0.210170714300091	4.337179	343.99659306698	23.352	10.015	0	1882	1898		-1		0				NaN	6222.5	0;1168.468;1394.135;1497.074;1555.886;2075.186;2228.609;2594.566;3665.554;6064.287;4387.062;3213.941;4394.306;2722.101;0	0
20140904-PurClathDigest-1ug-01	MULTI	1	343.99464	342.98737	37697.4921875	53	33	2	NaN	0.987366	-0.210408514252549	3.484074	343.996778978956	23.598	22.735	0	1898	1933		-1		0				NaN	4549.5	0;1362.186;1209.914;1377.465;2462.415;2816.609;3788.249;4924.541;5738.892;3567.249;2126.485;3216.754;4606.998;5040.643;4320.254;2351.623;3373.574;4191.901;2757.513;3206.895;2745.817;4553.553;4605.215;3881.257;3438.922;5041.169;2811.67;3556.458;2785.926;1108.088;3102.247;0;0;0;0	0
20140904-PurClathDigest-1ug-01	MULTI	1	341.98734	340.98006	23822.939453125	7	4	2	NaN	0.980065	-0.21678631051941	6.518213	341.989661566934	23.806	5.01	0	1932	1940		-1		0				NaN	5820.6	0;5672.656;1207.424;1768.864;555.8683;0	0
20140904-PurClathDigest-1ug-01	MULTI	3	339.86916	1016.5856	NaN	11	7	2	NaN	0.585644	0.0780141811776502	2.646096	339.869444557848	23.829	7.03	0	1931	1942		-1		0				NaN	2853.7	0;927.5193;721.2592;2506.08;2381.901;1672.067;1312.415;955.8923;0	0
20140904-PurClathDigest-1ug-01	MULTI	1	340.03785	339.03057	38486.26171875	15	9	2	NaN	0.03057	-0.165384050874536	1.59089	340.037883600243	23.979	6.46	0	1946	1956		-1		0				NaN	3159.5	0;587.8167;1193.208;3079.164;2303.76;2487.284;1180.484;1679.531;2098.093;0;0	0
20140904-PurClathDigest-1ug-01	MULTI	1	340.99683	339.98955	NaN	6	4	2	NaN	0.989552	-0.206843321249437	4.830795	340.999210053054	24.102	3.315	0	1959	1964		-1		0				NaN	4827	0;887.5169;1393.168;4704.328;3954.77;0	0
20140904-PurClathDigest-1ug-01	MULTI	1	340.04285	339.03557	NaN	22	17	2	NaN	0.035572	-0.160384754147231	3.730916	340.038347481676	24.139	12.675	0	1955	1975		-1		0				NaN	2258.8	0;1086.267;705.0795;730.4794;709.7951;1845.998;1505.851;1294.282;2751.786;2941.223;1870.277;2541.921;2130.234;2696.04;2472.302;1691.994;0;0;0	0
20140904-PurClathDigest-1ug-01	MULTI	1	340.99074	339.98347	30053.619140625	8	5	2	NaN	0.983468	-0.212924025591974	3.296066	340.993253919232	24.347	5.4	0	1982	1990		-1		0				NaN	4546.7	0;3953.826;5276.574;4431.109;2120.375;1379.404;0	0
20140904-PurClathDigest-1ug-01	MULTI	2	343.18578	684.357	36349.359375	52	40	2	NaN	0.357005	0.00220060829997237	1.14223	343.185913655623	24.396	29.895	0	1962	2008		-1		0				NaN	5344.9	0;997.2969;1773.307;1470.384;966.8937;1593.168;2041.281;2489.394;2187.767;1886.139;1370.117;2059.263;1345.211;1543.433;1199.954;856.4738;1149.177;2483.295;3805.331;2613.62;4964.393;2865.975;4214.609;3254.896;3829.272;3238.632;3540.906;3310.217;3318.087;3235.28;2440.933;3543.751;3480.84;4370.473;2631.635;2006.857;0;0;0;0;0;0	0
20140904-PurClathDigest-1ug-01	MULTI	1	344.01271	343.00544	38126.109375	53	38	2	NaN	0.005436	-0.192346960411896	1.922529	344.014119433261	24.571	28.5	0	1983	2026		-1		0				NaN	4852.5	0;2380.009;2432.605;2028.108;2702.947;3372.26;3213.197;3096.124;3352.772;1649.658;2666.408;2949.631;3842.181;2858.318;3494.378;1930.355;4435.44;2191.254;3560.94;3660.221;4417.325;4470.666;2778.297;3949.992;5251.403;4579.326;3714.885;2698.55;4459.534;2507.771;3427.037;3590.038;2723.738;1545.302;2092.492;2273.552;2580.081;1957.822;1080.877;0	0
20140904-PurClathDigest-1ug-01	MULTI	6	343.51998	2055.0762	37835.66796875	30	21	2	NaN	0.076211	0.0908759224689675	0.895088	343.686922994462	24.715	17.77	0	2008	2035		-1		0				NaN	9441.5	0;660.9693;2201.625;1420.07;3509.804;2490.749;3415.685;3589.073;3900.909;3763.343;5200.515;1455.821;1442.51;2614.704;927.4105;1159.724;3143.632;2027.5;2166.781;1872.806;774.4304;1122.737;0	0
20140904-PurClathDigest-1ug-01	MULTI	1	339.03845	338.03117	35942.72265625	49	34	2	NaN	0.031173	-0.164321442181176	0.809099	339.039045179342	24.669	26.465	0	1995	2035		-1		0				NaN	11419	0;5264.408;7968.836;6643.64;6887.482;4329.63;7704.52;7309.684;8379.91;7836.036;6050.995;7411.361;6166.406;6603.713;9853.15;9892.488;8381.806;6788.142;7908.492;9477.391;4896.901;9034.597;7937.37;11128.98;10606.73;7101.015;8270.842;9267.422;6980.049;7251.991;7383.598;9445.374;7027.799;5339.435;5633.904;0	0
20140904-PurClathDigest-1ug-01	MULTI	1	340.03547	339.02819	32601.330078125	16	14	2	NaN	0.028194	-0.167758663102973	4.288046	340.037895282028	24.926	11.725	0	2030	2047		-1		0				NaN	2641.1	0;638.6094;1777.725;2774.662;2573.939;2920.37;967.1526;1475.218;1176.801;878.3842;1612.694;774.2178;1246.37;658.3235;0;0	0
20140904-PurClathDigest-1ug-01	MULTI	1	340.99818	339.9909	NaN	6	4	2	NaN	0.990901	-0.205494709976904	3.677991	340.999304770694	24.983	3.425	0	2040	2045		-1		0				NaN	4008.3	0;1776.303;2759.696;981.1009;3275.854;0	0
20140904-PurClathDigest-1ug-01	MULTI	1	340.99138	339.9841	31413.248046875	9	8	2	NaN	0.984104	-0.212288682480278	4.220829	340.989575338366	25.101	6.09	0	2048	2057		-1		0				NaN	6384.2	0;1267.644;2160.452;3053.261;5856.78;7117.798;749.3176;853.9507;0;0	0
20140904-PurClathDigest-1ug-01	MULTI	3	338.18645	1011.5375	35069.9296875	32	21	2	NaN	0.537507	0.0322001787375257	1.506191	338.186514057099	25.047	15.41	0	2034	2056		-1		0				NaN	6117.4	0;1014.751;1695.928;581.6624;555.838;584.9047;638.4575;486.0521;569.509;700.5569;2114.121;3617.315;2693.804;3453.116;3967.292;6026.7;3383.212;4235.288;5372.23;3231.774;4173.179;681.7604;0	0
20140904-PurClathDigest-1ug-01	MULTI	3	349.85002	1046.5282	34821.25	29	20	2	NaN	0.528226	0.00682272426297459	1.402782	349.849943204033	25.056	14.365	0	2036	2057		-1		0				NaN	6611.6	0;1563.608;957.4087;1048.996;1480.033;637.5187;1270.583;677.6124;824.0157;1743.444;3925.316;3429.307;3135.726;2989.638;3577.971;2512.783;2393.664;2756.305;3154.364;5720.001;0;0	0
20140904-PurClathDigest-1ug-01	MULTI	3	349.17767	1044.5112	NaN	6	4	2	NaN	0.511195	-0.00927966505219047	4.23674	349.177830994108	25.204	3.77	0	2060	2066		-1		0				NaN	2650.2	0;2292.799;1144.472;1195.729;1260.97;0	0
20140904-PurClathDigest-1ug-01	MULTI	1	343.99462	342.98734	37833.80859375	108	74	2	NaN	0.987342	-0.210431927655407	2.37696	343.996908384789	24.319	54.005	0	1932	2015		-1		0				NaN	5489.2	0;1011.859;3031.404;1607.954;2488.689;1972.871;2468.177;3314.274;2235.169;1229.803;2530.587;2379.093;1582.912;3608.555;1936.113;1912.353;1630.453;3239.964;2535.125;1397.015;1867.967;858.9792;2884.982;1955.041;2508.279;1017.268;2319.659;1676.858;3509.532;1115.997;1934.156;1748.593;2726.28;2020.625;3287.262;1884.289;2480.48;2437.912;2497.911;3867.054;2488.274;4100.396;4117.634;3815.63;1850.834;2583…	0
20140904-PurClathDigest-1ug-01	MULTI	1	343.99449	342.98722	37833.79296875	81	46	2	NaN	0.987217	-0.210557155227434	2.913585	343.996834446749	24.979	35.14	0	2014	2067		-1		0				NaN	4479.3	0;916.791;1542.693;2710.252;4825.099;2959.337;3239.293;3262.819;2682.167;2781.377;4360.651;3439.913;2450.367;2395.483;2833.067;3129.684;3188.821;1829.389;2495.342;3440.137;3682.647;2985.859;2608.125;3005.007;1926.371;2578.094;3000.381;3424.016;3271.468;3469.551;2526.547;4096.159;3241.502;3753.573;2588.745;4660.041;5087.878;2670.05;1368.61;3592.706;1822.029;3660.777;2628.31;3161.853;2831.189;1708.…	0
20140904-PurClathDigest-1ug-01	MULTI	1	343.99444	342.98716	37327.5078125	46	31	2	NaN	0.98716	-0.210614037864389	3.615057	343.997115132785	25.412	24.25	0	2064	2100		-1		0				NaN	4447.7	0;1554.608;956.0176;1182.1;2748.597;2087.5;2786.223;3236.615;5485.31;3111.932;3702.496;4318.606;1958.882;2830.551;2872.852;4334.599;2632.118;2942.152;3866.525;2030.236;803.1223;2028.898;3501.909;2228.768;2123.723;1858.952;1775.273;2666.293;2223.879;950.7314;1903.251;0;0	0
20140904-PurClathDigest-1ug-01	MULTI	1	340.03496	339.02768	35990.08984375	9	5	2	NaN	0.027683	-0.168269646198667	3.197907	340.037520468657	25.494	4.095	0	2086	2092		-1		0				NaN	2829.4	0;2757.525;1916.12;1114.188;1604.773;1261.003;0	0
20140904-PurClathDigest-1ug-01	MULTI	1	341.98522	340.97794	NaN	6	4	2	NaN	0.977941	-0.218908965139065	5.556857	341.988859936516	25.55	3.315	0	2091	2096		-1		0				NaN	5673.7	0;731.5079;2367.261;5529.485;1845.504;0	0
20140904-PurClathDigest-1ug-01	MULTI	1	340.99304	339.98576	36126.625	16	12	2	NaN	0.985763	-0.210630623387033	3.938346	340.998123026448	25.587	8.79	0	2090	2103		-1		0				NaN	4700.6	0;783.2239;1250.911;2719.732;1440.05;1818.587;3389.127;3710.218;2183.223;2309.691;4581.084;1180.006;0;0	0
20140904-PurClathDigest-1ug-01	MULTI	1	341.98752	340.98024	35988.828125	5	3	2	NaN	0.980243	-0.216607735930779	6.261117	341.990494468616	25.724	3.27	0	2107	2112		-1		0				NaN	3236.3	0;3000.262;3154.002;865.2658;0	0
20140904-PurClathDigest-1ug-01	MULTI	1	349.18027	348.17299	25142.134765625	8	5	2	NaN	0.172994	-0.0271659919800413	3.797397	349.179085147487	25.708	4.67	0	2104	2111		-1		0				NaN	4293.9	0;2423.274;1048.866;1609.347;4184.742;3375.63;0	0
20140904-PurClathDigest-1ug-01	MULTI	3	338.18611	1011.5365	36331.38671875	45	33	2	NaN	0.536487	0.0311798686420843	0.758234	338.186100130397	25.577	24.055	0	2080	2115		-1		0				NaN	8659.5	0;1692.503;513.3611;1875.891;827.8491;3442.505;1156.851;1509.913;1477.599;2835.67;4547.962;2863.118;4093.59;7617.903;5401.66;5184.657;5171.724;5577.229;7604.693;5564.911;6339.94;6212.483;3513.281;2437.154;1376.153;1121.883;1417.703;632.6512;648.829;1717.203;1184.5;0;0;0;0	0
20140904-PurClathDigest-1ug-01	MULTI	3	338.18579	1011.5355	36331.3515625	35	26	2	NaN	0.535542	0.0302356728858513	0.947986	338.185820463089	25.303	20.915	0	2056	2088		-1		0				NaN	7279	0;1653.883;2607.24;2109.281;4133.75;2694.335;1254.92;4716.053;4076.884;3810.713;7088.1;3456.645;7944.928;6392.403;3107.152;3853.003;4659.905;3044.291;4149.753;3669.669;2624.999;4012.723;5400.446;2282.92;3004.43;0;0;0	0
20140904-PurClathDigest-1ug-01	MULTI	4	340.98073	1359.8938	NaN	17	12	2	NaN	0.89382	0.228268662189521	3.485109	341.232753733946	25.887	10.4	0	2116	2132		-1		0				NaN	4642.6	0;1426.734;1105.173;1824.222;1872.415;2187.008;2178.57;1238.019;1554.21;3571.221;1686.732;0;0;0	0
20140904-PurClathDigest-1ug-01	MULTI	1	340.99073	339.98346	52874.328125	6	4	2	NaN	0.983455	-0.212936925874601	3.545627	340.992244795421	25.944	3.374	0	2127	2132		-1		0				NaN	4091.3	0;3343.641;1611.005;2229.288;2195.843;0	0
20140904-PurClathDigest-1ug-01	MULTI	3	339.17139	1014.4923	37394.37890625	11	8	2	NaN	0.492329	-0.0143371659414697	1.499171	339.171063672305	26.022	6.585	0	2131	2141		-1		0				NaN	6852.2	0;569.6375;2245.476;1940.779;2508.116;3778.107;1720.409;2766.893;1178.937;0	0
20140904-PurClathDigest-1ug-01	MULTI	4	340.98108	1359.8952	NaN	8	6	2	NaN	0.895212	0.229660122838368	3.664895	341.232873978151	26.021	5.235	0	2132	2140		-1		0				NaN	2830.2	0;991.7687;893.4452;1806.811;2177.092;905.1259;880.7801;0	0
20140904-PurClathDigest-1ug-01	MULTI	1	343.99442	342.98715	37558.6328125	73	54	2	NaN	0.987146	-0.210627984968596	3.294469	343.996689476253	25.785	39.81	0	2090	2150		-1		0				NaN	4210	0;1006.3;503.1887;1779.75;1723.12;783.1648;705.8802;2200.706;1643.338;1999.144;1424.754;4103.021;3175.593;2547.525;1870.844;3619.603;3774.143;3337.864;2555.005;3501.574;4036.209;2712.6;3911.668;2650.196;4046.732;3897.005;4139.161;2251.519;4143.258;2548.72;2291.494;1466.215;1607.349;1509.114;1637.986;1017.925;1698.503;1084.444;1425.981;1766.49;809.3665;579.9167;1405.039;1271.827;1381.433;1370.099;…	0
20140904-PurClathDigest-1ug-01	MULTI	1	340.03587	339.02859	NaN	5	4	2	NaN	0.028591	-0.167362600674494	5.111892	340.038164732705	26.362	3.625	0	2164	2170		-1		0				NaN	2742.3	0;648.5306;818.0978;1600.937;1993.143;0	0
20140904-PurClathDigest-1ug-01	MULTI	3	339.17173	1014.4934	37394.4140625	35	26	2	NaN	0.493353	-0.0133135137663203	1.289998	339.171685795159	26.384	19.61	0	2153	2183		-1		0				NaN	7721.3	0;1296.539;1945.305;1299.507;1798.762;3139.994;2170.86;4422.619;1587.258;2611.114;2186.699;1121.718;1694.266;1203.12;3792.066;3974.453;2765.684;3287.435;4659.791;3140.791;3217.522;3555.838;3300.756;1785.68;2028.139;1424.437;1081.519;0	0
20140904-PurClathDigest-1ug-01	MULTI	1	343.99492	342.98765	37419.921875	28	21	2	NaN	0.987647	-0.210127608640505	4.187948	343.996988480261	26.555	14.3	0	2174	2196		-1		0				NaN	6063.6	0;782.6714;1524.884;1454.632;1240.065;1025.498;2006.242;2971.515;2875.175;3712.397;5909.425;3012.556;4184.537;3714.674;4257.916;2812.73;1764.412;1431.262;1465.253;1344.168;0;0;0	0
20140904-PurClathDigest-1ug-01	MULTI	3	339.17204	1014.4943	35137.3984375	45	30	2	NaN	0.494284	-0.0123831422790772	0.866862	339.171885176323	26.71	22.446	0	2183	2219		-1		0				NaN	8123.6	0;2765.203;681.6207;1481.584;2971.943;3548.439;2089.076;5128.643;4022.652;3304.636;3799.177;6283.781;5907.4;6384.238;2993.401;7325.668;5816.44;8497.381;4030.689;5029.605;3434.722;7134.094;5055.015;6128.37;3481.199;2408.374;2679.902;2358.735;0;0;0;0	0
20140904-PurClathDigest-1ug-01	MULTI	1	344.01279	343.00551	35572.41796875	20	13	2	NaN	0.005514	-0.192268919404341	3.869495	344.014605073123	27.006	11.194	0	2219	2236		-1		0				NaN	4959.6	0;2272.716;1958.385;3399.104;4482.52;4420.501;5116.342;2570.976;3708.083;3912.811;3434.455;5005.038;1585.426;0;0	0
20140904-PurClathDigest-1ug-01	MULTI	3	339.17185	1014.4937	38274.50390625	37	25	2	NaN	0.493713	-0.01295425921694	1.329173	339.171681475141	27.034	19.695	0	2215	2246		-1		0				NaN	6579.3	0;1180.296;1609.449;1523.293;2745.941;4581.394;5777.885;3401.168;3653.57;4216.872;3923.457;3772.264;3921.657;3696.968;2621.247;2663.541;3781.971;3073.367;3813.741;3335.236;4674.558;0;0;0;0;0;0	0
20140904-PurClathDigest-1ug-01	MULTI	4	335.65829	1338.6041	39046.51953125	13	8	2	NaN	0.604051	-0.0517073137550597	1.515371	335.658415467303	27.522	6.865	0	2272	2283		-1		0				NaN	8441.1	0;1759.527;4628.021;3891.114;3468.109;3372.736;3663.455;1572.937;0;0	0
20140904-PurClathDigest-1ug-01	MULTI	1	343.99477	342.98749	37964.97265625	43	29	2	NaN	0.98749	-0.210284649556456	3.434197	343.996969718884	27.59	21.835	0	2263	2298		-1		0				NaN	5306.7	0;1251.51;1737.372;1798.778;1445.261;1392.938;2993.288;485.1623;2631.023;3586.501;3620.903;4447.427;1983.764;3500.096;3094.983;2689.87;1609.245;2532.037;2953.035;4743.468;3026.435;2732.61;2890.174;3047.737;5171.819;859.9543;2478.486;973.4121;0;0;0	0
20140904-PurClathDigest-1ug-01	MULTI	1	340.99115	339.98388	30405.37109375	4	2	2	NaN	0.983876	-0.21251615238549	7.613095	340.987106370585	27.728	2.41	0	2296	2301		-1		0				NaN	6224.2	0;6065.938;4236.682;0	0
20140904-PurClathDigest-1ug-01	MULTI	7	341.04955	2380.2959	NaN	4	2	2	NaN	0.295948	0.16101223708074	3.581723	341.050193546232	27.809	2.19	0	2304	2308		-1		0				NaN	4823.9	0;2721.002;1467.622;0	0
20140904-PurClathDigest-1ug-01	MULTI	1	343.99519	342.98792	37054.46484375	14	9	2	NaN	0.987916	-0.209858867910441	4.068512	343.996903811309	27.793	7.97	0	2296	2309		-1		0				NaN	4240.2	0;1487.39;1358.61;1973.962;2016.111;3406.641;3771.509;4029.746;4132.384;2154.299;0	0
20140904-PurClathDigest-1ug-01	MULTI	3	343.18634	1026.5372	37127.99609375	99	78	2	NaN	0.537181	0.0249742293303825	0.629119	343.186316334606	27.091	58.615	0	2180	2273		-1		0				NaN	15933	0;2251.663;1912.198;4037.619;4568.783;2356.566;3479.407;2821.092;3371.126;2300.857;3179.579;2920.496;3521.499;3596.719;8779.59;4018.71;2035.458;1882.781;3686.914;3961.357;1771.959;3325.327;1799.474;3227.704;3546.221;4630.428;2849.392;1088.313;3621.183;1534.255;3387.969;2731.265;2851.799;5927.202;1976.009;3240.69;4827.642;2126.334;3265.079;5075.457;3302.558;2589.137;3072.678;3151.473;4388.361;2205…	0
20140904-PurClathDigest-1ug-01	MULTI	3	343.18644	1026.5375	37128.0078125	42	27	2	NaN	0.537498	0.0252903874772983	0.769307	343.186435846245	27.642	19.875	0	2273	2305		-1		0				NaN	11394	0;2764.956;2979.589;5750.224;6720.496;5830.789;7233.167;5992.75;9491.817;6722.217;6525.888;10061.96;9976.059;8997.38;10623.91;9666.485;9857.332;7942.087;11383.51;11801.47;6996.653;4989.575;7390.162;5849.139;3572.743;6042.646;5498.892;4868.335;0	0
20140904-PurClathDigest-1ug-01	MULTI	1	340.98881	339.98153	30814.5	9	7	2	NaN	0.981533	-0.214858447789425	3.333516	340.988651740319	27.943	6.21	0	2313	2323		-1		0				NaN	5715.6	0;3240.594;4671.121;3962.906;4335.979;4072.532;1848.236;0;0	0
20140904-PurClathDigest-1ug-01	MULTI	5	340.99305	1699.9289	39134.0078125	7	5	2	NaN	0.928857	0.106889724093207	4.073176	340.993272214941	28.021	4.935	0	2322	2330		-1		0				NaN	6530.9	0;2423.294;4534.133;4560.314;1941.883;877.6384;0	0
20140904-PurClathDigest-1ug-01	MULTI	6	343.50396	2054.9801	NaN	6	5	2	NaN	0.980077	-0.00521415892899313	3.674305	343.671918185975	28.089	4.085	0	2329	2335		-1		0				NaN	4701.1	0;953.5165;1490.747;2973.758;2915.324;0;0	0
20140904-PurClathDigest-1ug-01	MULTI	2	343.18599	684.35743	36717.86328125	74	55	2	NaN	0.357434	0.00263003375960125	0.876836	343.186275399947	25.218	40.685	0	2035	2096		-1		0				NaN	7882	0;1333.457;1495.19;807.001;1241.408;2206.287;996.5452;2338.442;2973.171;2434.044;1894.917;1939.915;1930.173;1879.552;1208.161;2109.666;3284.77;2695.572;4396.674;5583.607;2786.083;3612.527;3794.119;3264.062;7320.86;3314.421;7636.898;3392.446;4246.798;4647.183;4271.193;1857.187;4815.181;3683.113;4360.764;3382.563;4143.026;3555.027;1725.912;1393.072;1372.617;2630.185;532.299;1542.744;2756.584;2170.7…	0
20140904-PurClathDigest-1ug-01	MULTI	1	340.99088	339.9836	35917.53515625	7	6	2	NaN	0.983599	-0.212793351188793	4.477114	340.993947119416	28.234	4.91	0	2342	2350		-1		0				NaN	9820	0;3926.902;2596.402;4835.75;9570.367;6585.827;0;0	0
20140904-PurClathDigest-1ug-01	MULTI	1	343.9947	342.98742	38102.9296875	71	43	2	NaN	0.987421	-0.21035350940889	2.906009	343.996795126635	28.084	31.115	0	2309	2359		-1		0				NaN	6511.7	0;2150.248;2418;5659.719;4534.266;2915.292;2593.463;3229.236;4103.587;4494.115;3709.724;2373.096;3061.238;4031.034;3808.783;4094.054;4274.234;3680.756;3247.606;2692.381;3737.162;6288.87;3858.073;4228.49;2669.381;3784.312;5686.247;6346.159;3506.296;6191.452;2937.212;5728.818;3436.532;1421.801;997.1713;726.7523;977.7043;1400.522;817.7867;2307.895;1252.569;0;0;0;0	0
20140904-PurClathDigest-1ug-01	MULTI	3	338.18583	1011.5357	35311.38671875	26	17	2	NaN	0.535675	0.0303682849331608	1.230576	338.185757011403	25.931	14.38	0	2115	2137		-1		0				NaN	10328	0;1733.303;1945.619;3797.578;4442.159;3356.109;1937.903;4914.037;1963.22;6606.924;6742.492;7736.131;2296.391;6192.756;9069.878;6485.286;4099.546;4606.995;0	0
20140904-PurClathDigest-1ug-01	MULTI	3	338.18636	1011.5372	35311.4375	81	61	2	NaN	0.537236	0.0319291194671223	0.596436	338.186277904731	26.507	42.875	0	2137	2204		-1		0				NaN	14516	0;831.3719;1411.275;1067.524;723.7734;2784.993;2439.459;1458.318;2604.761;1765.854;1025.665;3455.425;683.7373;3027.854;2159.218;1684.944;1978.646;2272.349;2913.931;3365.521;3407.472;2041.932;1876.436;1797.992;2443.238;2580.509;2333.429;2850.391;1829.641;2596.716;1565.206;2298.883;2193.348;2214.609;5496.462;7573.636;15197.38;8794.269;7618.631;9177.823;8866.573;7960.364;6177.759;12921.14;14238.44;1…	0
20140904-PurClathDigest-1ug-01	MULTI	3	338.18636	1011.5373	35311.44140625	157	100	2	NaN	0.53726	0.0319531989468942	0.612793	338.186351823383	27.561	73.67	0	2222	2340		-1		0				NaN	23349	0;5012.777;6421.168;7651.255;9547.072;6060.932;10364.02;6344.631;5517.788;7479.372;10747.08;9709.169;12552.76;5703.67;10082.48;11828.34;4549.972;9465.083;10669.1;3893.718;8473.012;6739.049;4492.076;8410.19;8470.629;6838.792;7039.375;8541.365;7410.79;12785.92;12723.65;12736.65;10338.47;14770.82;14193.97;11962.3;17012.06;10369.4;11922.57;10810.79;16626.09;15413.89;10046.81;14194.28;10997.95;16867.5…	0
20140904-PurClathDigest-1ug-01	MULTI	1	340.98603	339.97875	NaN	6	4	2	NaN	0.97875	-0.217640631284155	4.917414	340.98232696787	28.476	3.13	0	2368	2373		-1		0				NaN	4360.2	0;4249.333;4550.604;1050.835;1403.108;0	0
20140904-PurClathDigest-1ug-01	MULTI	3	338.17019	1011.4887	36646.36328125	16	12	2	NaN	0.488745	-0.0165398562576229	1.983999	338.504774626025	28.503	9.55	0	2364	2379		-1		0				NaN	13216	0;934.7759;1399.382;1703.839;2275.246;2560.78;3258.625;1478.248;667.0204;932.0964;910.3776;1796.864;0;0	0
20140904-PurClathDigest-1ug-01	MULTI	1	340.98945	339.98217	25142.671875	5	4	2	NaN	0.98217	-0.214221920348109	4.038783	340.990496586449	28.623	3.115	0	2382	2387		-1		0				NaN	7057.9	0;6878.539;3300.733;3173.065;0;0	0
20140904-PurClathDigest-1ug-01	MULTI	1	340.03696	339.02968	38455.8125	5	3	2	NaN	0.029683	-0.166270799022357	3.216501	340.038182963536	28.671	3.07	0	2386	2391		-1		0				NaN	3295.7	0;2693.451;1587.928;3178.653;0	0
20140904-PurClathDigest-1ug-01	MULTI	7	341.05079	2380.3046	30336.580078125	21	16	2	NaN	0.304625	0.169684696550121	2.478095	341.193780117559	28.78	11.755	0	2392	2411		-1		0				NaN	11337	0;2660.891;1174.126;5202.094;2133.934;4866.608;2050.838;4216.818;3421.51;3385.683;3364.744;3343.805;929.0217;1258.172;2163.141;1610.241;0;0	0
20140904-PurClathDigest-1ug-01	MULTI	1	342.99703	341.98976	36056.23828125	84	53	2	NaN	0.989758	-0.207557030087912	0.819626	342.997930200385	27.211	41.91	0	2215	2282		-1		0				NaN	17111	0;9244.761;9351.326;10754.42;12451.42;10379.1;10677.37;11730.57;14133.32;8520.479;16154.89;14742.27;14224.46;11599.27;10356.09;13195.56;16676.34;12385.77;16141.35;12637.48;13390.33;13725.92;13120.5;14473.21;13481.58;11570.18;14624.18;13273.98;12967.24;13414.96;14652.28;13405.81;14862.33;16993.73;14772.25;15760.27;15152.34;15965.39;12633.92;8769.876;13480.73;10870.14;11161.74;8737.014;13812.27;108…	0
20140904-PurClathDigest-1ug-01	MULTI	1	340.99419	339.98692	NaN	4	2	2	NaN	0.986917	-0.209476896682702	4.971165	340.997122443782	28.907	2.2	0	2410	2413		-1		0				NaN	7343.7	0;4724.604;7157.055;0	0
20140904-PurClathDigest-1ug-01	MULTI	4	340.98082	1359.8942	NaN	6	4	2	NaN	0.894169	0.228618061241832	3.73391	340.980502263351	29.105	3.21	0	2428	2433		-1		0				NaN	6025.7	0;958.5137;4635.094;3347.721;619.4648;0	0
20140904-PurClathDigest-1ug-01	MULTI	3	338.17084	1011.4907	35694.52734375	6	4	2	NaN	0.490696	-0.0145894473267845	2.70186	338.170780231807	29.166	3.17	0	2433	2438		-1		0				NaN	6554.4	0;977.5183;529.4183;5756.074;4337.045;0	0
20140904-PurClathDigest-1ug-01	MULTI	1	340.98278	339.9755	NaN	7	6	2	NaN	0.975503	-0.220885540850361	4.137578	340.981986572001	29.28	5.065	0	2443	2451		-1		0				NaN	3148.4	0;909.7108;2573.106;1953.1;1940.348;1931.364;0;0	0
20140904-PurClathDigest-1ug-01	MULTI	6	345.01055	2064.0196	NaN	4	2	2	NaN	0.019643	0.0301942802752819	2.605284	345.010965972993	29.384	2.47	0	2455	2459		-1		0				NaN	4701.8	0;2974.187;1137.659;0	0
20140904-PurClathDigest-1ug-01	MULTI	3	349.85029	1046.529	34883.390625	908	417	3	NaN	0.52905	0.00764642234389612	0.212339	349.850274533048	28.558	301.385	0	2058	2531		-1		0				NaN	96279	0;2115.813;789.4804;2012.085;1544.517;585.6752;1785.886;2518.554;1958.226;1947.588;2421.922;5460.021;527.9902;1060.922;2426.768;4272.778;1578.358;2718.296;1946.539;2424.548;2172.799;1328.205;2321.202;2573.489;3136.458;1562.202;1130.72;2298.789;3501.524;4884.763;4569.196;5120.475;2524.104;3401.744;4531.182;1584.207;4426.541;4417.299;3706.344;5395.406;3848.519;3557.337;4262.764;4730.101;4643.428;48…	7	2210;2258;2307;2356;2405;2453;2500	0;0;0;0;0;0;0	0;0;0;0;0;0;0
20140904-PurClathDigest-1ug-01	MULTI	3	349.17865	1044.5141	36452.00390625	243	186	2	NaN	0.514107	-0.00636971673975495	0.49501	349.178442945756	28.183	134.245	0	2252	2466		-1		0				NaN	33716	0;2769.427;3826.25;5877.114;6036.97;4465.546;8795.354;6302.184;8062.142;7197.849;8191.079;8296.668;6179.807;6994.879;7043.244;7943.416;8410.814;6604.639;10947.21;5252.863;8295.373;16632.1;9453.774;11036.44;10559.74;10293.41;10957.27;10197.95;11933.61;11535.96;10973.11;10059.55;9946.396;9336.008;14007.78;17304.25;16446.71;23623.75;18912.78;21106.67;18012.19;10658.27;21598.63;15649.82;22558.99;1798…	0
20140904-PurClathDigest-1ug-01	MULTI	3	338.17102	1011.4912	NaN	6	4	2	NaN	0.491219	-0.014066577556946	3.770364	338.505946268391	29.44	3.24	0	2460	2465		-1		0				NaN	3321.8	0;2917.192;2512.756;727.8989;716.322;0	0
20140904-PurClathDigest-1ug-01	MULTI	1	340.99538	339.9881	NaN	5	3	2	NaN	0.988101	-0.208293058085815	4.051584	340.994093743722	29.452	2.565	0	2461	2465		-1		0				NaN	3341.3	0;3099.959;3564.131;2730.697;0	0
20140904-PurClathDigest-1ug-01	MULTI	3	343.8466	1028.518	34808.3671875	349	187	3	NaN	0.517981	0.00486247751246083	0.429684	343.846668586396	29.048	133.04	0	2313	2524		-1		0				NaN	40349	0;3245.835;2206.474;2617.163;2674.123;3069.83;2303.756;3845.925;3720.858;4799.158;3398.266;3371.583;2889.017;4473.187;2784.996;6109.37;9150.182;6578.332;10040.37;5228.071;6876.24;7857.824;9952.124;6912.538;7559.284;5606.024;8680.609;8117.628;8110.393;12789.56;6502.982;10143.16;12620.95;8944.047;11948.04;9952.359;7723.786;14841.42;11509.05;11417.8;12034.63;9997.587;23713.5;18125.74;17458.92;25803.…	0
20140904-PurClathDigest-1ug-01	MULTI	3	343.18638	1026.5373	36409.046875	110	69	2	NaN	0.537313	0.0251054222917446	0.611828	343.186359717251	28.665	49.785	0	2350	2430		-1		0				NaN	17135	0;2072.514;3578.3;2794.32;2822.318;4970.792;7559.683;9937.605;11678.14;5720.847;11127.94;7403.684;11378.88;10800.15;8978.951;13050;9959.536;11690.98;14824.08;10006.54;10192.4;15037.23;16183.55;10423.56;7749.415;10736.6;13371.92;10934.91;10839.67;10048;7336.478;9296.387;15094.69;10131.48;12668.05;10828.73;6290.972;11880.72;10878.6;11230.87;17106.04;12861.82;4193.257;11754.99;13847.28;8551.191;9566…	0
20140904-PurClathDigest-1ug-01	MULTI	7	341.05125	2380.3078	38266.0390625	35	28	2	NaN	0.307802	0.172860700934962	1.461678	341.194123011064	29.592	20.035	0	2464	2495		-1		0				NaN	13087	0;2808.377;1456.292;3477.554;1890.516;3573.876;4475.734;2598.925;4190.801;1917.402;2314.39;4202.258;3601.302;2510.772;1420.242;1600.839;4177.949;1877.78;717.0712;1240.981;2321.906;2442.634;1646.878;851.121;907.5725;1484.834;941.3353;0;0;0	0
20140904-PurClathDigest-1ug-01	MULTI	1	341.9831	340.97582	NaN	5	4	2	NaN	0.975822	-0.221026888021242	7.435031	341.986687169694	29.739	3.28	0	2488	2493		-1		0				NaN	3234.1	0;3151.866;2118.549;786.95;0;0	0
20140904-PurClathDigest-1ug-01	MULTI	3	344.18104	1029.5213	26784.451171875	27	19	2	NaN	0.521301	0.00772162390353515	1.653443	344.180973043266	29.802	14.72	0	2484	2507		-1		0				NaN	11507	0;2122.7;1119.466;3775.298;7316.038;7689.177;4049.36;8161.324;4618.898;7030.705;7890.075;8326.961;8715.695;9955.051;7963.909;5641.548;6801.5;2649.266;1706.846;0;0	0
20140904-PurClathDigest-1ug-01	MULTI	1	340.9914	339.98412	34938.31640625	4	2	2	NaN	0.98412	-0.212273056953222	5.542609	340.98835311412	29.866	2.54	0	2499	2503		-1		0				NaN	3118.5	0;2767.458;3039.195;0	0
20140904-PurClathDigest-1ug-01	MULTI	1	340.99541	339.98813	22570.28515625	9	8	2	NaN	0.988129	-0.208265771387175	4.117705	340.994806265597	29.925	6.735	0	2501	2511		-1		0				NaN	7868.9	0;760.2398;3005.105;1900.687;796.2675;5387.731;7668.837;1839.667;0;0	0
20140904-PurClathDigest-1ug-01	MULTI	3	344.1809	1029.5209	31552.693359375	15	10	2	NaN	0.520878	0.00729841744237092	0.928841	344.180822368449	29.99	7.425	0	2508	2520		-1		0				NaN	13742	0;4050.054;4361.121;8265.931;8432.155;8804.687;5705.844;647.8369;3809.033;6970.229;0;0	0
20140904-PurClathDigest-1ug-01	MULTI	1	341.01607	340.00879	36497.76953125	1373	593	3	NaN	0.008792	-0.18761240069847	0.676706	341.017589452504	18.135	452.951	0	1024	1632		-1		0				NaN	220790	0;14137.3;8438.409;11862.52;12539.14;11885.19;13398.46;14210.27;13830.96;12228.32;14529.11;12084.83;10373;13363.58;11256.73;14045.02;14021.66;10224.29;11551.53;26162.12;13533.22;12419.35;12083.66;14647.65;12831.7;12195.02;10970.61;13410.96;12539.79;14322.56;16379.22;11743.44;17165.85;15050.77;14746.45;11792.19;13673.67;12996.11;12893.54;12603.9;11039.58;13375.3;11331.5;14262.88;13220.48;10918.88;…	0
20140904-PurClathDigest-1ug-01	MULTI	1	341.01706	340.00979	36497.875	2290	764	3	NaN	0.009785	-0.186619476817668	0.59891	341.018669406352	25.636	572.47	0	1624	2543		-1		0				NaN	225050	0;100896.5;139488.5;157143.4;163733.3;156740.3;174292.3;159117.6;156534.4;159266.4;177658.2;159026;158157.4;175252.3;190760;164859;176438.3;174846.4;156898.1;167791.6;172908.9;168754.8;187131.4;176469.7;166598.5;171971.3;176139.8;174674.6;181194.5;175755.2;175845.4;171436.1;175952.5;190305.8;190040.5;183965.7;188200.2;190654.8;184154;174623.8;187379.3;177521.9;171906.6;189021.6;181036.9;187940.4;…	0
20140904-PurClathDigest-1ug-01	MULTI	1	344.97387	343.96659	36222.9453125	138	61	3	NaN	0.96659	-0.23163497499695	2.582271	344.975620575869	16.296	55.64	0	1282	1344		-1		0				NaN	24865	0;15159.19;10327.38;13292.79;12819.09;21312.64;15748.96;11606;17101.32;16349.01;23090.6;21970.8;14247.13;19312.21;11063.47;19675.78;13723.24;10923.22;15737.02;12884.63;16990.11;24798.48;14911;16131.08;23391.05;15994.03;21728.46;14982.07;18573.1;18645.7;19702.87;21263.89;20314.39;12854.22;13862.94;3522.794;3894.93;3531.296;5746.722;3288.125;5311.514;6031.998;3286.703;3947.976;4496.802;4576.996;721…	0
20140904-PurClathDigest-1ug-01	MULTI	1	345.97304	344.96576	36502.26953125	23	16	2	NaN	0.965763	-0.232921443024964	4.01455	345.975024040739	15.714	11.155	0	1254	1271		-1		0				NaN	4651.1	0;2114.793;863.3831;1661.415;3249.201;2890.476;4302.455;4318.953;3844.935;2544.222;4650.235;1518.676;1957.049;3672.996;3801.184;2230.061;1202.851;0	0
20140904-PurClathDigest-1ug-01	MULTI	1	344.97475	343.96747	36223.0390625	419	212	3	NaN	0.967471	-0.230754032754646	0.891097	344.976245811123	19.633	175.811	0	1405	1632		-1		0				NaN	37562	0;1477.176;2365.999;1455.301;2401.325;1688.554;1275.068;1256.134;1781.995;2046.129;2161.581;1639.28;1951.825;1777.595;1901.225;1360.813;1536.249;2405.847;13126;10223.58;15403.73;14976.86;13183.04;13768.31;15894.67;13458.61;11042.25;13279.85;14402.62;15120.53;13429.61;17498.76;17321.46;16088.05;14372.06;14357.29;17285.57;14029.24;13614.49;13825.64;15650.7;15006.42;16324.16;23063.89;17504.16;16031.…	0
20140904-PurClathDigest-1ug-01	MULTI	1	345.97473	344.96745	36502.44921875	72	51	2	NaN	0.967449	-0.23123649164819	3.130777	345.976850240405	30.024	36.21	0	2478	2535		-1		0				NaN	9291.9	0;2048.389;2342.566;1756.231;3984.121;2178.598;2686.506;2282.687;2550.738;2355.243;2739.138;3475.132;2239.261;2220.693;2503.638;2485.08;2804.199;3543.552;4276.566;2614.615;2215.07;1901.164;3701.614;1182.213;2824.081;4459.148;2181.01;2749.924;4043.22;3399.307;2060.608;5399.258;7721.259;5273.294;8278.847;9055.661;8509.997;5368.467;7885.493;8672.74;9078.388;5572.45;4851.747;6599.817;8472.706;7656.97…	0
20140904-PurClathDigest-1ug-01	MULTI	1	345.97424	344.96696	36502.3984375	92	65	2	NaN	0.966961	-0.231724069331733	2.243576	345.97617834602	24.254	46.59	0	1939	2010		-1		0				NaN	8636.6	0;3097.692;3248.722;4255.857;4251.931;3943.777;4177.227;2287.878;4028.823;4656.257;4546.058;5059.327;5100.566;4337.414;3694.458;5520.892;4543.317;4732.631;5517.452;4121.861;4059.341;2327.992;3493.631;4310.621;4511.17;7058.369;4351.722;4646.525;7147.344;8849.158;8811.838;7647.938;6061.363;9386.238;7218.631;7537.135;7729.203;7810.426;6702.679;10715.79;7473.133;8442.288;9127.152;5696.291;5589.883;81…	0
20140904-PurClathDigest-1ug-01	MULTI	1	345.97396	344.96669	36502.3671875	152	85	2	NaN	0.966686	-0.231998568315305	2.151531	345.976281563069	25.916	63.215	0	2078	2173		-1		0				NaN	10424	0;3413.645;3437.973;4834.387;4994.2;3829.592;4671.403;3860.144;3857.639;3890.196;3701.202;6248.886;7506.978;6031.474;7287.202;7230.503;7935.202;5563.17;6089.264;6459.023;6521.342;6087.692;6655.458;5819.374;5760.589;6528.712;6780.024;6807.361;7217.352;5095.211;8885.538;8228.26;5048.83;7293.079;4946.084;5262.004;7608.855;6671.841;5888.405;6603.829;6737.943;7913.389;9304.182;6460.445;10493.83;7309.0…	0
20140904-PurClathDigest-1ug-01	MULTI	1	345.97386	344.96658	36502.35546875	55	31	2	NaN	0.966584	-0.232100712333533	3.226753	345.976217751641	24.835	24.735	0	2010	2047		-1		0				NaN	10084	0;2795.519;3054.63;3557.007;3594.879;4240.315;5262.826;4682.723;9258.61;7640.041;5303.056;6031.588;5075.669;6501.89;5656.562;9594.539;9827.461;6868.784;6606.94;4276.588;5966.582;6429.547;5394.605;7071.36;5527.814;5091.645;6879.873;4246.531;6086.874;5390.176;1961.203;2932.39;0	0
20140904-PurClathDigest-1ug-01	MULTI	1	344.97538	343.9681	36223.10546875	141	77	3	NaN	0.968101	-0.230124362276968	1.154994	344.976957944146	25.169	58.52	0	2013	2101		-1		0				NaN	35017	0;16847.07;16756.44;17047.19;17373.92;22361.71;20938.13;16806.56;18155.09;21717.73;18510.33;18287.35;26055.65;28618.11;24343.89;18739.78;17019.51;21193.75;19091.13;18898.51;16461.06;22916.2;18715.55;23148.29;17114.45;18334.62;17324.68;16907.9;23031.6;24300.97;21493.54;27530.16;22102.73;24020.82;23529.03;27558.16;24643.31;25889.07;33294.8;28894.82;34015.54;38265.75;34910.98;34706.11;25157.55;31897…	0
20140904-PurClathDigest-1ug-01	MULTI	1	345.97412	344.96684	36502.3828125	77	48	2	NaN	0.966842	-0.231842898375021	3.004521	345.976621047829	26.678	36.101	0	2173	2230		-1		0				NaN	11121	0;3578.433;2553.658;3386.464;4474.883;4747.901;5427.951;4568.665;7050.61;4622.167;8631.848;9357.962;7772.146;6426.313;5662.306;7706.022;7073.917;7527.607;6722.844;8941.396;9019.242;10838.17;7523.149;8582.021;6852.987;7705.071;7520.868;8473.899;8298.406;6574.051;7567.959;5738.638;9008.039;10487.35;8498.766;4439.989;6745.648;2085.782;3808.256;5171.747;2898.787;2284.21;2596.112;1844.018;2425.86;3263…	0
20140904-PurClathDigest-1ug-01	MULTI	1	345.97388	344.9666	36502.359375	233	151	2	NaN	0.9666	-0.232084734485852	1.829366	345.97629257752	22.355	107.505	0	1689	1864		-1		0				NaN	11143	0;3931.783;1214.51;2225.669;3475.824;2489.47;2533.676;2564.057;3604.428;1516.268;2031.602;2485.866;3670.403;1925.64;2312.364;1907.11;2826.553;3220.275;3666.363;3766.102;2673.912;2225.011;1940.065;3819.231;3158.461;3374.407;3292.751;2452.284;4795.056;928.5829;5333.029;2520.202;2623.007;2694.15;2965.085;1384.593;4595.762;4709.753;1977.14;2590.736;2090.426;2751.424;2887.565;2766.428;2457.125;3530.86…	0
20140904-PurClathDigest-1ug-01	MULTI	1	345.97396	344.96668	36502.3671875	130	84	2	NaN	0.966682	-0.232002624040206	2.204428	345.976177215148	23.322	57.675	0	1848	1939		-1		0				NaN	11718	0;4136.818;7186.183;3702.238;5933.895;5569.644;5792.135;5392.814;5426.853;2446.073;4677.464;4270.068;6137.712;4108.655;5923.021;6045.346;6193.884;8253.229;9630.375;7835.781;8534.059;10618.53;7474.561;10132.17;9213.555;9884.07;10055.92;8567.713;7538.493;10317.32;9208.883;7068.674;6707.703;8447.793;7884.472;7751.559;7863.973;8315.49;8613.167;9117.938;9392.13;7594.197;10474.29;7164.75;7854.041;9859.…	0
20140904-PurClathDigest-1ug-01	MULTI	1	345.97427	344.96699	36502.3984375	158	101	2	NaN	0.966994	-0.231691267107692	1.880135	345.976524223168	28.512	72.74	0	2312	2429		-1		0				NaN	10345	0;2816.298;4667.041;3970.374;5653.03;6646.61;6862.798;4421.583;4991.152;4151.58;5121.742;5197.193;5614.248;4610.196;3853.898;6351.723;3130.648;4746.048;5172.524;5797.914;5134.263;4102.233;5045.542;4686.475;5801.644;5977.466;4660.963;5297.053;4117.995;4349.923;4667.035;8145.355;6954.185;8187.385;7187.181;8138.483;10751.99;6162.921;10779.23;6270.328;5889.686;9402.733;7145.832;8015.629;8217.473;7297…	0
20140904-PurClathDigest-1ug-01	MULTI	3	343.18641	1026.5374	36409.05078125	61	35	2	NaN	0.537411	0.0252035114513092	0.566675	343.186417047414	28.127	25.49	0	2313	2354		-1		0				NaN	16571	0;2182.629;2374.988;1640.375;1287.164;3173.683;5496.425;5462.014;11280.31;6462.159;7170.54;8644.009;6343.455;8504.706;12085.92;8842.423;10795.07;10697.13;14336.59;10728.7;8763.527;7021.02;12107.9;6299.459;11904.8;10155.87;4571.887;10661.47;8811.989;10294.55;13473.71;9548.646;4493.962;7030.625;3690.885;4162.837;0	0
20140904-PurClathDigest-1ug-01	MULTI	4	338.89627	1351.556	35561.19140625	13	5	4	NaN	0.555978	-0.10573736772244	2.238429	338.896081282998	30.281	10.146	0	2533	2575		-1		0				NaN	547360	0;44686.02;536102.5;299976.4;181714.3;59022.83;0	0
20140904-PurClathDigest-1ug-01	MULTI	4	342.661	1366.6149	35166.30078125	7	4	3	NaN	0.614876	-0.0537672913999359	3.759873	342.660607931361	30.256	8.375	0	2533	2567		-1		0				NaN	94186	0;60356.75;87062.41;35263.89;0;0	0
20140904-PurClathDigest-1ug-01	MULTI	4	342.69124	1366.7359	35212.7578125	13	5	3	NaN	0.735862	0.0671630634160465	3.530308	342.690977446677	30.269	10.146	0	2533	2575		-1		0				NaN	923140	0;853321.9;343512.1;371968.5;224810.2;287092.6;0	1	2541	0	0
20140904-PurClathDigest-1ug-01	MULTI	3	348.54136	1042.6023	35543.546875	4	2	2	NaN	0.602263	0.0826664147698466	2.95416	348.541531494858	30.286	5.705	0	2535	2559		-1		0				NaN	167620	0;41077.9;145011.5;0	0
20140904-PurClathDigest-1ug-01	MULTI	3	349.15314	1044.4376	34201.2109375	22	7	5	NaN	0.437593	-0.082848308698658	1.444934	349.153339454386	30.304	14.575	0	2535	2599		-1		0				NaN	14003000	0;1639501;1.398971E+07;3623342;1792048;444447.3;360042.5;98879.56;0	1	2557	0	0
20140904-PurClathDigest-1ug-01	MULTI	3	342.53793	1024.592	35216.5078125	16	7	3	NaN	0.59197	0.0806572834226245	1.139995	342.537840848916	30.327	14.575	0	2535	2599		-1		0				NaN	2129600	0;30003.67;987347;2072996;683097.9;281122.6;204430.5;27349.84;0	0
20140904-PurClathDigest-1ug-01	MULTI	3	346.55367	1036.6392	36055.859375	5	3	2	NaN	0.63918	0.122326097473206	1.609741	346.553779761701	30.336	7.415	0	2543	2575		-1		0				NaN	310850	0;36735.71;168109.2;268930.8;0	0
20140904-PurClathDigest-1ug-01	MULTI	4	349.41583	1393.6342	34445.28125	9	5	2	NaN	0.634216	-0.0468557392323419	2.914855	349.415903034382	30.277	10.146	0	2533	2575		-1		0				NaN	527900	0;288946;190474.9;172288.9;279846.2;20708.62;0	0
20140904-PurClathDigest-1ug-01	MULTI	3	349.84944	1046.5265	35061.48828125	38	18	4	NaN	0.52648	0.00507755381931929	1.135845	349.84951299385	30.306	26.69	0	2527	2631		-1		0				NaN	6607100	0;1845.219;1614.623;1508.841;4120.233;27176.31;24303.89;333667.7;4008275;6600796;4321910;1760538;736341.8;241234.4;136696.2;94392.16;11293.94;132742.8;87294.75;0	0
20140904-PurClathDigest-1ug-01	MULTI	2	350.72106	699.42758	26696.15234375	4	2	2	NaN	0.427576	0.0658388312505167	2.117415	350.721362665801	30.333	5.295	0	2551	2575		-1		0				NaN	158940	0;196562.9;147621.3;0	0
20140904-PurClathDigest-1ug-01	MULTI	3	343.53704	1027.5893	38870.7890625	10	5	3	NaN	0.589305	0.0766134309360496	1.737839	343.536835491725	30.375	10.65	0	2559	2607		-1		0				NaN	419100	0;406098.5;385572.8;60907.52;63090.07;40748.94;0	0
20140904-PurClathDigest-1ug-01	MULTI	2	335.69799	669.38143	35694.29296875	25	13	4	NaN	0.381426	0.033510397356622	0.706892	335.697984458894	30.349	25.58	0	2535	2647		4410	VAANAPK	7	Unmodified	_VAANAPK_	P49951;F1MPU0	86.5385665893555	45698000	0;4709.869;293248;4.221894E+07;4.563409E+07;1.087526E+07;5277500;1202200;489447.7;442336.1;242413.8;280164.2;216228.4;206382.3;0	1	2560	0	0
20140904-PurClathDigest-1ug-01	MULTI	4	336.92587	1343.6744	39026.8984375	5	3	2	NaN	0.674357	0.0162666433814138	3.456783	336.925533124151	30.421	7.135	0	2575	2607		-1		0				NaN	425790	0;327527.3;133312.8;25991.81;0	0
20140904-PurClathDigest-1ug-01	MULTI	3	338.18944	1011.5465	35302.12109375	22	10	3	NaN	0.546498	0.0411861811898007	1.184364	338.18951980404	30.363	20.12	0	2535	2623		4151	SVSEGHLKR	9	Unmodified	_SVSEGHLKR_	Q28115	70.6560287475586	12261000	0;41795.07;52419.08;1456633;1.193457E+07;2609732;1246211;931582.5;174224.3;140596.5;38080.88;0	1	2570	0	0
20140904-PurClathDigest-1ug-01	MULTI	3	338.84231	1013.5051	35222.6171875	29	12	4	NaN	0.505088	-0.00112478095638835	0.767935	338.842304371639	30.406	23.445	0	2551	2655		-1		0				NaN	21598000	0;152046.9;1272198;2.149447E+07;1.426061E+07;5844641;2494241;1179136;235066.9;154948.3;39152.02;131768.3;115134.8;0	1	2578	0	0
20140904-PurClathDigest-1ug-01	MULTI	3	341.51387	1021.5198	36525.28515625	19	6	4	NaN	0.519775	0.00987563682792825	0.704384	341.513812808442	30.423	20.125	0	2543	2631		-1		0				NaN	7164200	0;125720.4;25156.87;165892.2;1755732;7158933;2994225;1119897;583095;282325.5;0;0	1	2589	0	0
20140904-PurClathDigest-1ug-01	MULTI	4	341.43277	1361.702	35525.76953125	10	7	2	NaN	0.701988	0.0356053650184549	1.064898	341.432777757294	30.426	14.48	0	2567	2631		-1		0				NaN	1340500	0;300276.9;1031174;512520.7;152886.8;125932.3;51317.59;49809.18;0	0
20140904-PurClathDigest-1ug-01	MULTI	3	347.18886	1038.5447	35383.2421875	58	28	4	NaN	0.544739	0.0270086485829779	0.61146	347.188845427076	30.433	53.85	0	2535	2767		2120	KIHEEEVR	8	Unmodified	_KIHEEEVR_	Q28115	104.103401184082	51802000	0;9313.796;59656.58;405585;244905;1.193325E+07;5.149837E+07;2.186311E+07;9421908;4405511;1625608;750030.9;435592;341968.9;266928.4;292086.4;244882.4;130763.7;98744.5;43811.17;189439.9;117041.7;139652.8;60435.04;21357.46;104229.1;114022.5;78796.25;49761.81;0	1	2581	0	0
20140904-PurClathDigest-1ug-01	MULTI	3	350.83504	1049.4833	43026.57421875	4	2	2	NaN	0.483283	-0.0394792050835804	2.711181	350.835534264488	30.425	5.355	0	2575	2599		-1		0				NaN	139670	0;117112.9;120834.8;0	0
20140904-PurClathDigest-1ug-01	MULTI	4	339.95837	1355.8044	35692.140625	18	8	3	NaN	0.804374	0.140703961040117	1.51413	340.209202481292	30.406	16.195	0	2551	2623		-1		0				NaN	849960	0;35076.85;144234.6;785675.2;396771.8;262819.3;187563.8;30920.97;47672.3;0	0
20140904-PurClathDigest-1ug-01	MULTI	3	340.19541	1017.5644	35270.3515625	9	5	2	NaN	0.564408	0.0563287057429989	1.830172	340.195356724889	30.433	10.785	0	2567	2615		-1		0				NaN	533500	0;44811.3;499868.2;468520.5;185356.9;59796.9;0	0
20140904-PurClathDigest-1ug-01	MULTI	3	344.5174	1030.5304	35312.8125	91	41	5	NaN	0.530377	0.0163327800482875	0.57766	344.517521863931	30.422	79.005	0	2543	2879		2295	KWREEQR	7	Unmodified	_KWREEQR_	G3N252;P04975	76.7621231079102	204340000	0;2348650;7764482;2.324197E+07;2.041423E+08;1.37414E+08;6.929949E+07;3.464972E+07;1.505028E+07;6324711;3566359;2772810;2181603;1300719;1395489;888362;1134874;1202853;1130256;965648.8;1065474;878632.9;516754.2;512729;504232.2;565648.2;449270.3;343512.4;350567.7;328706.6;224597.5;268051.8;248511.7;181785;163443.2;174408.6;105247.9;65314.75;47845.94;57792.8;70101.16;84524.6;0	1	2569	0	0
20140904-PurClathDigest-1ug-01	MULTI	2	334.17994	666.34533	36273.90234375	43	25	4	NaN	0.345333	-0.00118552704168451	0.879194	334.179913172234	30.456	47.99	0	2543	2751		-1		0				NaN	11310000	0;68885.71;56819.6;1207156;1.065315E+07;6197706;4524966;1.129459E+07;9576442;3032809;1133057;328302.1;227609.9;135191.8;79685.45;93501.88;52051.01;84647.48;57294.82;53765.96;53841.62;88949.56;60032.29;48841.21;81328.34;33998.73;0	1	2580	0	0
20140904-PurClathDigest-1ug-01	MULTI	2	336.7238	671.43304	36394.046875	8	5	2	NaN	0.433043	0.0841833153048128	1.551281	336.723831087262	30.511	10.975	0	2591	2639		-1		0				NaN	217770	0;203636.9;180792.4;180328;82912.63;41573.9;0	0
20140904-PurClathDigest-1ug-01	MULTI	3	339.81765	1016.4311	36584.4453125	11	6	2	NaN	0.431124	-0.0764345582039141	0.748622	339.817706554301	30.442	12.71	0	2575	2631		-1		0				NaN	2542300	0;1467728;2232603;810910.4;314357.4;80834.2;41660.02;0	0
20140904-PurClathDigest-1ug-01	MULTI	2	342.22612	682.43768	37299.12109375	9	6	2	NaN	0.437681	0.0837598207177734	1.761746	342.226081479175	30.507	12.765	0	2583	2639		-1		0				NaN	713310	0;26681.93;258216.5;662527.4;299387.8;144939.5;26435.2;0	0
20140904-PurClathDigest-1ug-01	MULTI	2	349.14628	696.27801	36032.93359375	12	6	3	NaN	0.278008	-0.0822797501861032	1.610644	349.146333293575	30.517	12.765	0	2583	2639		-1		0				NaN	227380	0;55979.3;89229.56;203058.7;224670.6;97145.66;53999.65;0	0
20140904-PurClathDigest-1ug-01	MULTI	3	337.84189	1010.5038	36464.484375	6	3	2	NaN	0.503837	-0.000994950306449027	2.240868	337.842103007943	30.527	7.355	0	2599	2631		-1		0				NaN	448920	0;235454;394235.2;135492.2;0	0
20140904-PurClathDigest-1ug-01	MULTI	3	341.83354	1022.4788	34177.203125	8	4	3	NaN	0.47878	-0.0315601411774651	1.803755	341.83352470362	30.549	9.225	0	2607	2647		-1		0				NaN	317010	0;308580.7;215998.3;77937.82;0;0	0
20140904-PurClathDigest-1ug-01	MULTI	3	348.21735	1041.6302	35558.65234375	22	13	3	NaN	0.630227	0.111077000420664	2.883155	348.217745907182	30.539	25.465	0	2575	2687		-1		0				NaN	1906700	0;35225.94;345669.8;1847510;1603988;579638.3;310401.1;118830.2;371898.8;835766.5;450377.5;278475.7;139956.9;75151.39;0	0
20140904-PurClathDigest-1ug-01	MULTI	2	325.66082	649.30708	35418.046875	20	8	3	NaN	0.307077	-0.0316039800052295	0.567813	325.660794106757	30.514	16.37	0	2583	2655		-1		0				NaN	3130800	0;736167.3;1808708;1963587;3097966;1341624;437755.3;108155.3;32703.11;0	0
20140904-PurClathDigest-1ug-01	MULTI	3	341.86606	1022.5764	35438.19921875	69	26	4	NaN	0.576355	0.0659703511953467	0.533834	341.866034471608	30.578	49.925	0	2551	2767		4299	TPPKSPATPK	10	Unmodified	_TPPKSPATPK_	F1MEW3	100.492401123047	8205600	0;37988.34;194389.4;190538.1;527046.4;1597383;2881395;5035884;8166438;4837049;2913138;2144351;1422730;881624.1;900137.5;816449.5;463813.4;457552.7;450026.7;496754.1;396702.8;188111.7;194145.8;237024.1;183268.4;36461.16;113666.3;0	1	2610	0	0
20140904-PurClathDigest-1ug-01	MULTI	4	341.44595	1361.7547	36219.4921875	17	7	3	NaN	0.754696	0.088288367475343	1.115908	341.446168263835	30.505	14.58	0	2583	2647		-1		0				NaN	950470	0;364014.2;897691.5;878582.1;426990.8;449190.2;245586.5;41076.19;0	0
20140904-PurClathDigest-1ug-01	MULTI	3	343.19773	1026.5713	35109.26953125	19	8	3	NaN	0.571349	0.0591266698284016	1.023649	343.197590761645	30.598	16.46	0	2599	2671		-1		0				NaN	1874600	0;51545.13;231132.2;1018783;1816474;1343087;171633.1;229250.6;58576.19;0	0
20140904-PurClathDigest-1ug-01	MULTI	1	323.1702	322.16293	33261.5078125	8	5	2	NaN	0.162926	-0.025268755591469	4.052994	323.170866517158	30.573	11.015	0	2607	2655		-1		0				NaN	670870	0;159012.6;658304.8;355020.8;202318.7;0;0	0
20140904-PurClathDigest-1ug-01	MULTI	3	328.52196	982.54405	25234.720703125	5	3	2	NaN	0.544051	0.0520806362369513	1.540676	328.522070224613	30.596	7.345	0	2615	2647		-1		0				NaN	90115	0;41070.98;79138.23;59005.46;0	0
20140904-PurClathDigest-1ug-01	MULTI	3	337.4962	1009.4668	34738.90625	5	3	2	NaN	0.466764	-0.0375910747608259	3.094281	337.496044138945	30.616	7.25	0	2623	2655		-1		0				NaN	312470	0;148495.3;274412.6;33897.22;0	0
20140904-PurClathDigest-1ug-01	MULTI	2	338.69302	675.3715	35963.3828125	5	3	2	NaN	0.371497	0.0208259692350339	2.537082	338.69268909837	30.63	7.25	0	2623	2655		-1		0				NaN	240150	0;80785.41;223049.6;187748.1;0	0
20140904-PurClathDigest-1ug-01	MULTI	2	340.19854	678.38252	35960.62109375	8	7	2	NaN	0.382519	0.0304634550572018	2.579473	340.198243851864	30.599	14.68	0	2607	2671		-1		0				NaN	285910	0;18615.91;156131.4;265552.7;141442.1;35383.32;31273.26;0;0	0
20140904-PurClathDigest-1ug-01	MULTI	4	345.70271	1378.7817	35708.21484375	63	19	5	NaN	0.781735	0.107495121633292	0.614508	345.702695830253	30.515	36.295	0	2551	2711		-1		0				NaN	25277000	0;167920.6;184814.5;328206;534990.3;5472083;2.514324E+07;1.655484E+07;7512142;7498627;4973585;3358942;1674925;1504245;595002.3;224428.9;257888.4;133365;57478.56;61332.97;0	1	2630	0	0
20140904-PurClathDigest-1ug-01	MULTI	3	350.18943	1047.5465	36072.8359375	9	4	3	NaN	0.546452	0.0245802240801822	1.188255	350.189320954874	30.59	9.135	0	2615	2655		-1		0				NaN	593860	0;513774.7;606038.9;306178.1;56090.54;0	0
20140904-PurClathDigest-1ug-01	MULTI	3	349.1774	1044.5104	35585.66796875	15	13	2	NaN	0.510385	-0.0100898584844344	2.116395	349.177341212731	30.682	25.85	0	2615	2727		-1		0				NaN	520670	0;30485.47;23605.97;450456.8;191531;239300.9;27145.28;28038.79;25308.39;76709.11;103298;129886.9;65662.87;0;0	0
20140904-PurClathDigest-1ug-01	MULTI	2	324.68975	647.36494	30804.564453125	40	18	3	NaN	0.364938	0.0271504015801156	0.60917	324.689696384926	30.597	34.955	0	2583	2735		-1		0				NaN	2817800	0;1511140;1708995;2390513;2788197;2617209;2220826;2092388;1393298;1322681;1118594;870542.7;721220.3;754546.4;308636.3;221267.1;166747.5;104546.1;0;0	0
20140904-PurClathDigest-1ug-01	MULTI	3	325.53485	973.58273	NaN	5	4	2	NaN	0.582735	0.0948867552008323	1.354748	325.534837857991	30.645	9.105	0	2631	2671		-1		0				NaN	106110	0;93881.95;99878.37;39213.32;0;0	0
20140904-PurClathDigest-1ug-01	MULTI	3	335.51316	1003.5176	35548.65625	19	11	2	NaN	0.51764	0.0160223802336077	1.459892	335.513252761878	30.48	21.755	0	2567	2663		-1		0				NaN	2260000	0;22718.19;130920;2153780;1984750;722607.5;301041.8;183273.2;242771.6;175252.9;116318.6;0;0	0
20140904-PurClathDigest-1ug-01	MULTI	3	347.83671	1040.4883	36191.62890625	4	2	2	NaN	0.488301	-0.0303233275099046	1.494804	347.836654414442	30.634	5.44	0	2631	2655		-1		0				NaN	331810	0;287065.1;180158.2;0	0
20140904-PurClathDigest-1ug-01	MULTI	1	347.22896	346.22168	34132.84765625	7	5	2	NaN	0.22168	0.0224181021070535	1.547103	347.228889483682	30.643	10.915	0	2623	2671		-1		0				NaN	778490	0;149970.6;758697.8;713919.3;270624;85814.95;0	0
20140904-PurClathDigest-1ug-01	MULTI	3	349.86986	1046.5878	33761.51953125	11	7	2	NaN	0.587753	0.0663226115093494	1.848196	349.869730767716	30.59	14.63	0	2599	2663		-1		0				NaN	724810	0;54440.03;154398.3;476879.2;627062.8;305778.2;76175.17;41496.2;0	0
20140904-PurClathDigest-1ug-01	MULTI	3	322.50707	964.49939	36225.7734375	11	6	2	NaN	0.499386	0.0157158528710397	1.056698	322.506996659339	30.584	12.85	0	2607	2663		-1		0				NaN	1218300	0;241226.5;1077937;469799.8;326073.1;244811;48777.95;0	0
20140904-PurClathDigest-1ug-01	MULTI	4	331.43263	1321.7014	37623.890625	13	6	4	NaN	0.701434	0.053451246221357	3.525999	331.432308070765	30.713	12.75	0	2639	2695		-1		0				NaN	450420	0;70412.7;198816.2;428199.5;227671.4;20635.71;22300.07;0	0
20140904-PurClathDigest-1ug-01	MULTI	2	330.69306	659.37157	36504.6484375	34	17	4	NaN	0.371572	0.0282608873684467	0.613377	330.693019442674	30.711	33.91	0	2631	2775		-1		0				NaN	22639000	0;318243.8;7496551;2.204515E+07;2.260748E+07;9707665;3853933;1479284;628343.4;325925.4;327770.8;132795.4;68144.41;113632.3;18543.94;45251.1;65595.12;66179.35;0	1	2651	0	0
20140904-PurClathDigest-1ug-01	MULTI	3	345.51478	1033.5225	35407.4453125	19	9	3	NaN	0.52251	0.00708954868377987	0.989069	345.514752380171	30.658	18.23	0	2623	2703		-1		0				NaN	3565100	0;115181.8;1757886;3454455;1644892;467636.1;132159.8;72498.98;33484.7;0;0	0
20140904-PurClathDigest-1ug-01	MULTI	2	321.6886	641.36265	40898.52734375	5	3	2	NaN	0.362653	0.0276263583049285	3.62053	321.68807514945	30.693	7.27	0	2639	2671		-1		0				NaN	310260	0;65987.72;289800.8;290128.6;0	0
20140904-PurClathDigest-1ug-01	MULTI	2	322.17918	642.34381	36865.109375	6	4	2	NaN	0.343809	0.00833052607663376	1.366936	322.179031993492	30.691	9.095	0	2639	2679		-1		0				NaN	535670	0;124823.8;500906.5;256358.4;54186.49;0	0
20140904-PurClathDigest-1ug-01	MULTI	2	343.21578	684.41702	NaN	5	3	2	NaN	0.417017	0.0621849101536327	3.852567	343.215156120398	30.772	7.31	0	2663	2695		-1		0				NaN	96876	0;51539.76;89979.1;39661.96;0	0
20140904-PurClathDigest-1ug-01	MULTI	2	345.2217	688.42884	31065.58203125	5	3	2	NaN	0.42884	0.0721629028596453	3.286367	345.221889792871	30.779	7.31	0	2663	2695		-1		0				NaN	134140	0;62093.8;124585.9;107366.7;0	0
20140904-PurClathDigest-1ug-01	MULTI	2	327.70023	653.38591	36590.1328125	10	6	2	NaN	0.385911	0.0453538974402363	1.028688	327.700095443723	30.788	12.85	0	2655	2711		-1		0				NaN	1121000	0;23997.05;304888.2;1048298;582211.8;221754.6;126026.4;0	0
20140904-PurClathDigest-1ug-01	MULTI	4	331.4275	1321.6809	34911.22265625	6	4	2	NaN	0.680878	0.0329049325105188	4.293174	331.428233696819	30.793	9.185	0	2671	2711		-1		0				NaN	368690	0;301208.2;74071.78;115571.3;0;0	0
20140904-PurClathDigest-1ug-01	MULTI	4	335.44877	1337.766	35628.109375	37	15	4	NaN	0.765993	0.110620619774863	1.45519	335.698842288273	30.836	30.26	0	2647	2775		-1		0				NaN	1543400	0;147379.3;180488.2;353807.4;1185590;1116964;1511633;1017581;429327.1;246179.4;223202.2;141066.5;96496.87;76837.23;59431.18;47927.47;0	0
20140904-PurClathDigest-1ug-01	MULTI	2	334.68989	667.36522	35910.88671875	26	15	2	NaN	0.365219	0.018231159525044	0.911691	334.689787817702	30.74	29.675	0	2623	2751		-1		0				NaN	1668400	0;371077.5;1560122;779596.3;453201.1;242254.8;413346.8;1108637;1129285;711538.4;531622.8;290723.8;158252.3;50412.05;80618.59;0;0	0
20140904-PurClathDigest-1ug-01	MULTI	2	338.67447	675.33439	34327.4375	7	5	2	NaN	0.334385	-0.0162686309118953	2.409315	338.67428388962	30.85	11.12	0	2671	2719		-1		0				NaN	230500	0;36986.7;71082.46;99900.91;214085.9;0;0	0
20140904-PurClathDigest-1ug-01	MULTI	2	337.69041	673.36628	38138.3046875	7	4	2	NaN	0.366275	0.0165266473750307	3.699572	337.69003401151	30.888	9.4	0	2687	2727		-1		0				NaN	184690	0;60704.82;142655.6;137788.3;127755.4;0	0
20140904-PurClathDigest-1ug-01	MULTI	2	339.70044	677.38634	36959.0234375	9	6	2	NaN	0.386336	0.0347387838612576	1.713089	339.70039085237	30.859	13.095	0	2679	2735		-1		0				NaN	303550	0;56444.7;281937.6;213731.9;108979.5;34041;18010.81;0	0
20140904-PurClathDigest-1ug-01	MULTI	4	347.67604	1386.675	37353.921875	21	7	4	NaN	0.67504	-0.00283042005230527	1.782493	347.676512490936	30.818	14.92	0	2671	2735		-1		0				NaN	1230700	0;1132074;702461.4;530760.7;595519.7;188641.4;30171.18;19774.74;0	0
20140904-PurClathDigest-1ug-01	MULTI	2	350.21685	698.41915	35014.6171875	11	8	2	NaN	0.419153	0.0578798379817727	1.43306	350.216939701633	30.863	16.795	0	2671	2743		-1		0				NaN	206390	0;41250.85;97513.11;167118.2;191693.8;129573.9;67081.11;21408.57;23179.78;0	0
20140904-PurClathDigest-1ug-01	MULTI	3	330.4932	988.45776	35952.4375	5	3	2	NaN	0.457756	-0.0369343982711143	3.235687	330.493079681961	30.919	7.605	0	2703	2735		-1		0				NaN	175360	0;153999.5;103988.3;50277.67;0	0
20140904-PurClathDigest-1ug-01	MULTI	3	336.87823	1007.6128	36255.8046875	8	5	2	NaN	0.612848	0.109345648665794	2.418796	336.877857049721	30.842	11.225	0	2679	2727		-1		0				NaN	374160	0;157027.1;328582;159667.6;104472;0;0	0
20140904-PurClathDigest-1ug-01	MULTI	2	348.65486	695.29517	34481.578125	19	10	3	NaN	0.295175	-0.0646611302039446	2.194888	348.654897862514	30.909	20.59	0	2663	2751		-1		0				NaN	1019100	0;49735.34;75681.85;21020.52;148406.4;538937.7;976723.9;1004038;444054;165098.7;45148.4;0	0
20140904-PurClathDigest-1ug-01	MULTI	2	350.22938	698.44422	27211.099609375	6	5	2	NaN	0.444217	0.0829325939048431	2.724776	350.229125523698	30.923	11.445	0	2703	2751		-1		0				NaN	308040	0;286106.9;283939.1;46397.49;39972.95;0;0	0
20140904-PurClathDigest-1ug-01	MULTI	2	338.6848	675.35505	36064.703125	17	7	3	NaN	0.355053	0.0043896267764012	0.994269	338.684817668105	30.971	15.5	0	2703	2767		-1		0				NaN	3239900	0;395495.6;1727838;3201285;2042167;549869.8;466366.8;115005.2;0	0
20140904-PurClathDigest-1ug-01	MULTI	2	342.70581	683.39706	34202.8515625	16	7	3	NaN	0.397065	0.04270210591676	0.767743	342.70566867321	30.922	15.31	0	2695	2759		-1		0				NaN	1838200	0;538794.3;1816235;1504357;797002.9;234968;87046.22;27295.17;0	0
20140904-PurClathDigest-1ug-01	MULTI	3	348.85738	1043.5503	36592.0078125	7	5	2	NaN	0.550314	0.0302810423886513	1.5904	348.857181641816	30.957	11.445	0	2703	2751		-1		0				NaN	649320	0;11722.03;307730.1;561749.1;113617.5;30619.47;0	0
20140904-PurClathDigest-1ug-01	MULTI	2	323.15291	644.29127	36447.421875	7	5	2	NaN	0.291275	-0.0450993817570406	2.829442	323.152799895224	30.99	11.605	0	2711	2759		-1		0				NaN	174500	0;26760.48;106862.3;163181.1;44525.57;44222.31;0	0
20140904-PurClathDigest-1ug-01	MULTI	3	328.83349	983.47864	37083.71875	9	4	3	NaN	0.478638	-0.0137625723187966	1.779678	328.833343421096	30.973	9.575	0	2711	2751		-1		0				NaN	631980	0;154784.4;615169;609003.9;10908.57;0	0
20140904-PurClathDigest-1ug-01	MULTI	2	329.67945	657.34435	34702.94140625	11	9	2	NaN	0.344354	0.00197550668474378	1.461151	329.679469501859	30.968	19.165	0	2687	2767		-1		0				NaN	450000	0;19409.14;30406.16;108058.4;220611.7;420798;318920.3;105050.9;0;0;0	0
20140904-PurClathDigest-1ug-01	MULTI	2	329.70338	657.39221	36692.96875	20	14	3	NaN	0.392214	0.049813326565527	0.98781	329.703352518127	30.985	29.51	0	2703	2823		-1		0				NaN	6996800	0;15036.76;1258067;6923365;6910574;1629360;548450.3;165391.3;43178.21;30108.95;43133.46;53126.3;13305.17;51730.16;20739.4;0	1	2732	0	0
20140904-PurClathDigest-1ug-01	MULTI	3	343.84576	1028.5155	35365.76953125	19	12	2	NaN	0.515465	0.00234785395218751	1.162156	343.845738185081	30.871	24.805	0	2671	2775		-1		0				NaN	1443200	0;38054.35;466918.6;1248606;1179196;569286.5;228477.5;137156.6;187222.9;24907.63;22784.63;26201.33;22189.59;0	0
20140904-PurClathDigest-1ug-01	MULTI	3	344.84057	1031.4999	33405.3515625	15	7	3	NaN	0.499886	-0.0146035909303919	1.111827	344.84057358442	30.973	15.62	0	2711	2775		-1		0				NaN	4162800	0;1784628;4033646;2202644;719036.4;356647.4;32324.24;46143.63;0	0
20140904-PurClathDigest-1ug-01	MULTI	3	346.20503	1035.5933	28469.587890625	7	4	2	NaN	0.593252	0.0768795074286572	2.411514	346.205133161514	30.967	9.48	0	2703	2743		-1		0				NaN	196750	0;24797.94;51686.01;170213.6;177263.3;0	0
20140904-PurClathDigest-1ug-01	MULTI	3	348.54506	1042.6133	37699.41796875	8	5	2	NaN	0.613337	0.093734778613225	1.352923	348.54507518638	30.955	11.445	0	2703	2751		-1		0				NaN	286030	0;15111.93;273685.4;247453.9;105967.3;23393.04;0	0
20140904-PurClathDigest-1ug-01	MULTI	3	334.83707	1001.4894	36373.03125	35	11	4	NaN	0.489394	-0.0112914680861422	1.041313	334.836965325949	30.978	23.13	0	2687	2783		3450	QRLDDEAR	8	Unmodified	_QRLDDEAR_	F1MSQ6	143	7483000	0;130977.6;275458.2;407354;2168231;7447233;5801894;1949838;878697.1;189278.6;79920.22;109229.4;0	1	2733	0	0
20140904-PurClathDigest-1ug-01	MULTI	3	341.84888	1022.5248	37184.0625	15	7	3	NaN	0.524819	0.0144577859500714	1.421964	341.849131509537	31.049	15.66	0	2719	2783		-1		0				NaN	1056100	0;26027.54;385142.7;827679.8;1027993;457864.1;153019.6;35029.59;0	0
20140904-PurClathDigest-1ug-01	MULTI	2	341.66722	681.31989	28956.638671875	6	4	2	NaN	0.319894	-0.0335130639653016	1.557057	341.667233870211	31.001	9.67	0	2719	2759		-1		0				NaN	390310	0;43954.32;362522.6;114497.2;39693.92;0	0
20140904-PurClathDigest-1ug-01	MULTI	3	332.18191	993.5239	36614.328125	21	8	3	NaN	0.523903	0.026882144643082	0.604239	332.181911867531	31.007	17.595	0	2711	2783		-1		0				NaN	2055500	0;184814.9;1639083;2000832;1588129;1079460;174259.4;112837.8;36777.4;0	0
20140904-PurClathDigest-1ug-01	MULTI	2	331.66657	661.31858	35133.4140625	12	7	2	NaN	0.318582	-0.0256245645040281	2.921807	331.6663715104	30.986	15.31	0	2695	2759		-1		0				NaN	529920	0;42978.93;23375.7;204542.4;354851.6;495530.4;234325.9;180133.7;0	0
20140904-PurClathDigest-1ug-01	MULTI	1	333.19223	332.18495	37100.953125	44	26	2	NaN	0.184949	-0.00785620213321181	0.695817	333.192117981884	31.063	51.42	0	2631	2847		-1		0				NaN	1125800	0;27119.05;87495.7;137649.2;213454.5;231799.9;271285;343676.9;399042.6;495975.2;536643.3;523495.5;646464.1;839564.8;805946.9;905210.8;793971.1;1027445;959978.4;926033.6;1097185;820427.1;559082.5;280872.1;116341.8;61437.39;40837.41;0	0
20140904-PurClathDigest-1ug-01	MULTI	3	349.18048	1044.5196	34966.52734375	16	6	3	NaN	0.519626	-0.000853482220009028	0.581007	349.180506236149	31.032	13.685	0	2719	2775		-1		0				NaN	1762900	0;283058;1225533;1530648;1708184;425665.6;93133.66;0	0
20140904-PurClathDigest-1ug-01	MULTI	3	349.86047	1046.5596	NaN	6	5	2	NaN	0.559594	0.0381767807366487	2.840777	349.860969742066	31.043	11.755	0	2727	2775		-1		0				NaN	141810	0;21754.2;118325.3;122683.3;53730.7;0;0	0
20140904-PurClathDigest-1ug-01	MULTI	2	350.67306	699.33158	26306.70703125	19	11	2	NaN	0.331576	-0.0301166897362464	2.730616	350.673256646135	31.028	23.905	0	2711	2807		-1		0				NaN	1858300	0;17495.66;632491.9;1725975;1405586;958956.4;235024.7;125524.5;115300.6;99467.98;114351.5;0;0	0
20140904-PurClathDigest-1ug-01	MULTI	2	322.22831	642.44207	41997.89453125	6	4	2	NaN	0.442073	0.106549395048546	2.556655	322.228060790147	31.071	9.885	0	2735	2775		-1		0				NaN	246000	0;70341.77;230036.6;149112.4;49768.83;0	0
20140904-PurClathDigest-1ug-01	MULTI	4	323.93271	1291.7018	35349.3515625	15	10	2	NaN	0.701754	0.0675710011055344	1.864589	323.932698961434	31.065	21.97	0	2719	2807		-1		0				NaN	541950	0;102543.5;355544.3;271947.4;373905.2;442752.7;359248.6;60991.08;23101.07;44676.1;0;0	0
20140904-PurClathDigest-1ug-01	MULTI	2	330.19777	658.38099	36328.5390625	9	4	3	NaN	0.38099	0.038134650979714	2.916827	330.1971810161	31.065	9.885	0	2735	2775		-1		0				NaN	791330	0;344326.8;739980;386243.2;138742.4;0	0
20140904-PurClathDigest-1ug-01	MULTI	1	346.20841	345.20113	36898.54296875	8	5	2	NaN	0.201133	0.00234030079030845	1.271661	346.208357853545	31.066	11.86	0	2735	2783		-1		0				NaN	608680	0;322232.9;593212;335476.6;101041.1;40209.27;0	0
20140904-PurClathDigest-1ug-01	MULTI	1	322.18744	321.18016	36655.29296875	35	25	2	NaN	0.180165	-0.00757797927934689	0.58741	322.187373284202	30.94	49.775	0	2671	2879		-1		0				NaN	4240100	0;242716.7;1033814;2213003;3304703;4094659;4160663;3906454;2507715;834576.4;409993.3;208475.3;234263.2;156717.6;160769.2;119519.8;86007.27;59708.08;58750.64;57793.21;104691.5;63073.63;131340.6;89482.01;110666.5;0;0	0
20140904-PurClathDigest-1ug-01	MULTI	2	337.1976	672.38065	36179.6640625	10	7	2	NaN	0.38065	0.03135507501554	0.815169	337.197581342545	31.098	16.175	0	2735	2799		-1		0				NaN	441420	0;125494.4;412777;286982.8;118340.5;27134.44;109695.5;92907.66;0	0
20140904-PurClathDigest-1ug-01	MULTI	3	347.16601	1038.4762	37555.8046875	8	6	2	NaN	0.476211	-0.0414877337034341	3.695672	347.166188996135	31.093	13.99	0	2735	2791		-1		0				NaN	248640	0;130964.5;137004.6;92450.36;134987.6;72204.94;27871.94;0	0
20140904-PurClathDigest-1ug-01	MULTI	3	337.49558	1009.4649	35768.125	5	4	2	NaN	0.464903	-0.0394506692579171	2.554035	337.495384773682	31.153	10.305	0	2759	2799		-1		0				NaN	143730	0;67260.52;126219.4;25488.38;0;0	0
20140904-PurClathDigest-1ug-01	MULTI	3	318.52588	952.55581	37198.58984375	13	7	3	NaN	0.555808	0.0776319833155412	0.922213	318.525706902478	31.168	16.225	0	2751	2815		-1		0				NaN	813230	0;54042.05;398196.2;793232;497283.7;151413.8;27996.11;31514.8;0	0
20140904-PurClathDigest-1ug-01	MULTI	4	324.17694	1292.6786	35854.59765625	13	5	3	NaN	0.67864	0.04400798752431	1.686094	324.176811937715	31.156	12.335	0	2751	2799		-1		0				NaN	599760	0;138630;367855.1;367187.8;242869.8;108677.8;0	0
20140904-PurClathDigest-1ug-01	MULTI	3	326.84414	977.51059	36652.234375	12	7	2	NaN	0.510592	0.0209375930455735	1.105074	326.844057765272	31.124	16.295	0	2743	2807		-1		0				NaN	604110	0;235502.3;448315.9;530529.4;302104.8;70232.47;96888.07;29906.86;0	0
20140904-PurClathDigest-1ug-01	MULTI	3	344.53515	1030.5836	36475.1640625	10	5	2	NaN	0.583622	0.0695538390691581	1.973127	344.869450861417	31.228	12.17	0	2767	2815		-1		0				NaN	353140	0;101698.6;162170.6;342179.6;201207.7;72858.36;0	0
20140904-PurClathDigest-1ug-01	MULTI	3	348.50548	1042.4946	35524.89453125	8	5	2	NaN	0.494609	-0.0249385020740647	2.03129	348.505402207998	31.184	12.3	0	2759	2807		-1		0				NaN	294210	0;27777.58;254529.1;270767.6;54612.85;40497.62;0	0
20140904-PurClathDigest-1ug-01	MULTI	3	330.20617	987.59669	35482.109375	9	6	2	NaN	0.596686	0.102391104025969	2.881046	330.205989842699	31.23	14.01	0	2767	2823		-1		0				NaN	342640	0;94131.71;185194.5;300903.1;179478.6;81059.24;23818;0	0
20140904-PurClathDigest-1ug-01	MULTI	4	335.2092	1336.8077	33252.35546875	11	5	3	NaN	0.807696	0.152764191744154	3.506294	335.209984006976	31.214	12.17	0	2767	2815		-1		0				NaN	491740	0;127351.1;280818.2;329216.8;124871.8;28535.93;0	0
20140904-PurClathDigest-1ug-01	MULTI	4	350.17241	1396.6605	34189.8828125	10	6	2	NaN	0.66053	-0.0219334466148666	1.523219	350.172528478608	31.218	14.01	0	2767	2823		-1		0				NaN	671720	0;152556.2;326596.8;510767.1;153624.3;26144.98;22895.96;0	0
20140904-PurClathDigest-1ug-01	MULTI	2	350.24107	698.46759	36861.40234375	8	5	2	NaN	0.467591	0.1062955078703	1.575357	350.241123314105	31.213	12.17	0	2767	2815		-1		0				NaN	168070	0;72840.68;161299.9;156102.5;125564.7;0;0	0
20140904-PurClathDigest-1ug-01	MULTI	2	323.683	645.35144	32621.138671875	11	8	2	NaN	0.351442	0.0145807651582572	2.556857	323.682534325662	31.243	17.845	0	2759	2831		-1		0				NaN	144520	0;22332.79;60180.7;44012.26;135144.5;161969.6;62329.52;22451.55;0;0	0
20140904-PurClathDigest-1ug-01	MULTI	1	331.23399	330.22671	36425.51171875	9	6	2	NaN	0.226711	0.0348063504581546	1.043843	331.23390994867	31.255	14.01	0	2767	2823		-1		0				NaN	395580	0;35342.49;102823.1;385523.2;369569.6;251042.8;70147.64;0	0
20140904-PurClathDigest-1ug-01	MULTI	3	337.84962	1010.527	34454.80859375	6	5	2	NaN	0.527026	0.0221833284831519	3.531357	337.849854542237	31.277	12.02	0	2775	2823		-1		0				NaN	177210	0;16618.7;36623.91;155623.4;89757.3;0;0	0
20140904-PurClathDigest-1ug-01	MULTI	2	338.69419	675.37383	36164.359375	9	5	2	NaN	0.37383	0.0231580865732894	0.774942	338.694065437456	31.262	12.02	0	2775	2823		-1		0				NaN	503990	0;35488.27;211858.5;468109.6;195464.9;26257.82;0	0
20140904-PurClathDigest-1ug-01	MULTI	3	336.87016	1007.5887	35973.625	17	6	4	NaN	0.588657	0.0851659306974852	0.853621	336.870139941192	31.306	13.685	0	2783	2839		-1		0				NaN	2636200	0;22179.91;971489.2;2623602;1377221;476824.1;180886.6;0	0
20140904-PurClathDigest-1ug-01	MULTI	2	347.65319	693.29183	32664.7109375	4	2	2	NaN	0.291834	-0.0670805955414835	2.928596	347.653343429598	31.272	6.075	0	2791	2815		-1		0				NaN	162940	0;151341.6;51041.41;0	0
20140904-PurClathDigest-1ug-01	MULTI	3	348.54533	1042.6142	NaN	6	4	2	NaN	0.614166	0.094563385513311	3.348899	348.879232584582	31.252	10.18	0	2775	2815		-1		0				NaN	124260	0;33938.38;55648.88;49768.96;0;0	0
20140904-PurClathDigest-1ug-01	MULTI	2	350.69738	699.38022	34169.05859375	8	5	2	NaN	0.380217	0.0185018957882903	3.540967	350.697374619634	31.258	12.17	0	2767	2815		-1		0				NaN	323700	0;16760.68;31728.08;168882.3;300651.8;178850.3;0	0
20140904-PurClathDigest-1ug-01	MULTI	4	323.91411	1291.6273	39424.44921875	6	3	2	NaN	0.627344	-0.00680475234548794	2.640657	323.914511673669	31.331	7.54	0	2799	2831		-1		0				NaN	132650	0;32673.71;108372.9;57426.23;0	0
20140904-PurClathDigest-1ug-01	MULTI	2	345.6881	689.36165	40058.17578125	6	3	2	NaN	0.361646	0.00453987554908508	2.344758	345.687983580732	31.337	7.54	0	2799	2831		-1		0				NaN	481060	0;42602.57;446811.9;298273.5;0	0
20140904-PurClathDigest-1ug-01	MULTI	2	332.6615	663.30846	36063.890625	11	10	2	NaN	0.308455	-0.0366665252670373	3.504834	332.661235370597	31.427	20.445	0	2807	2895		-1		0				NaN	337970	0;84181.38;316036.2;302105.8;80725.92;83044.63;43850.57;40002;36153.44;91276.32;0;0	0
20140904-PurClathDigest-1ug-01	MULTI	3	342.52945	1024.5665	40351.5	8	4	2	NaN	0.566521	0.0552203518279839	1.74807	342.529350591074	31.375	9.225	0	2807	2847		-1		0				NaN	617440	0;124904.4;542230.3;334047;260970.5;0	0
20140904-PurClathDigest-1ug-01	MULTI	2	347.17695	692.33934	35939.3984375	17	7	3	NaN	0.33934	-0.0191360956208655	1.582087	347.176799278486	31.385	14.815	0	2807	2871		-1		0				NaN	1593400	0;674836.8;1574444;1322898;967245.1;429642.8;138535;56416.82;0	0
20140904-PurClathDigest-1ug-01	MULTI	3	323.85009	968.52844	38314.7890625	6	4	2	NaN	0.528441	0.0429177633399149	1.78361	323.850237194673	31.476	9.27	0	2831	2871		-1		0				NaN	210550	0;121105.1;115646.8;110188.4;0;0	0
20140904-PurClathDigest-1ug-01	MULTI	3	338.1809	1011.5209	NaN	6	5	2	NaN	0.520884	0.0155839096702266	3.9886	338.181148716561	31.522	11.17	0	2839	2887		-1		0				NaN	132380	0;59230.04;67238.61;116257.3;102733.2;0;0	0
20140904-PurClathDigest-1ug-01	MULTI	3	330.51017	988.50868	36902.83203125	5	3	2	NaN	0.508681	0.0139665243729041	1.080429	330.510210787705	31.554	7.5	0	2863	2895		-1		0				NaN	607830	0;533791.6;228035.9;53983.01;0	0
20140904-PurClathDigest-1ug-01	MULTI	2	329.67965	657.34474	36875.796875	29	15	3	NaN	0.344738	0.00235917029249322	0.779138	329.679601597811	31.59	30.045	0	2831	2959		2829	LPDASR	6	Unmodified	_LPDASR_	F1N3M8;G3MYP5	135.106399536133	6583700	0;36436.56;182695.3;730456.6;3086453;6514529;3462504;853066.4;346441.6;469482.7;713594.5;1203832;1128044;539351.3;347373.7;122170;0	1	2870	0	0
20140904-PurClathDigest-1ug-01	MULTI	2	333.68251	665.35047	38871.19140625	6	4	2	NaN	0.350474	0.00441235301912002	2.910287	333.682797137524	31.555	9.32	0	2847	2887		-1		0				NaN	400420	0;42934.35;89272.05;280616.1;288075.4;0	0
20140904-PurClathDigest-1ug-01	MULTI	3	342.82841	1025.4634	NaN	5	3	2	NaN	0.463392	-0.0483211780740476	2.550342	343.163048609022	31.571	7.5	0	2863	2895		-1		0				NaN	193770	0;64054.5;167638.8;42639.46;0	0
20140904-PurClathDigest-1ug-01	MULTI	2	341.17322	680.33188	35325.890625	14	11	2	NaN	0.331882	-0.0210709370558106	1.357024	341.173146399699	31.621	22.605	0	2855	2951		-1		0				NaN	904770	0;130870.4;394335.8;840350.6;577348.2;188696.5;155789.8;122883.2;217138.7;164484.4;114804.2;0;0	0
20140904-PurClathDigest-1ug-01	MULTI	2	345.68217	689.34979	38658.546875	6	4	2	NaN	0.349793	-0.0073080548153257	3.063799	345.682032314946	31.589	9.37	0	2863	2903		-1		0				NaN	355340	0;98719.81;330039.7;201407.2;125990.6;0	0
20140904-PurClathDigest-1ug-01	MULTI	2	348.70574	695.39693	36384.05859375	16	6	3	NaN	0.396927	0.0370441418201608	0.649185	348.70565891093	31.573	13.015	0	2855	2911		-1		0				NaN	5999700	0;1099432;5237065;5928099;3225995;1169800;407991.3;0	1	2876	0	0
20140904-PurClathDigest-1ug-01	MULTI	4	350.68364	1398.7054	NaN	5	4	2	NaN	0.705443	0.0220387276572183	4.375526	350.684775316079	31.588	9.28	0	2871	2911		-1		0				NaN	572810	0;435557.9;211142.4;66444.2;0;0	0
20140904-PurClathDigest-1ug-01	MULTI	2	325.66077	649.30698	37453.80859375	6	3	2	NaN	0.306981	-0.0316997866112843	2.321866	325.660900672468	31.604	7.5	0	2871	2903		-1		0				NaN	436770	0;247019.6;408428.4;216397.1;0	0
20140904-PurClathDigest-1ug-01	MULTI	1	343.20887	342.20159	38090.0390625	10	6	2	NaN	0.201591	0.00417780807271129	0.92253	343.208823623774	31.595	12.995	0	2863	2919		-1		0				NaN	2786400	0;645439.6;2715532;2358993;1146619;154912.3;80376.05;0	0
20140904-PurClathDigest-1ug-01	MULTI	3	322.83545	965.48451	35942.76953125	6	4	2	NaN	0.484507	0.000384499290589702	1.642354	322.835452789577	31.646	9.255	0	2879	2919		-1		0				NaN	629340	0;59451.09;556826.4;194597.4;67467.77;0	0
20140904-PurClathDigest-1ug-01	MULTI	3	329.52602	985.55624	41663.6796875	5	3	2	NaN	0.556235	0.0628793532686132	1.771196	329.525863767439	31.66	7.395	0	2887	2919		-1		0				NaN	274990	0;241498.4;165491.2;116812.5;0	0
20140904-PurClathDigest-1ug-01	MULTI	2	333.67638	665.3382	37376.20703125	7	4	2	NaN	0.338201	-0.00785478220154801	1.640481	333.676213912875	31.649	9.255	0	2879	2919		-1		0				NaN	1560500	0;416065.7;1459239;1159521;282858.1;0	0
20140904-PurClathDigest-1ug-01	MULTI	2	333.69471	665.37487	36698.078125	16	7	3	NaN	0.374865	0.0287928625194809	0.607887	333.694699996957	31.621	14.9	0	2863	2927		-1		0				NaN	5285100	0;84967.29;1870583;5229566;3769132;1699217;482851;73997.8;0	1	2889	0	0
20140904-PurClathDigest-1ug-01	MULTI	3	334.51764	1000.5311	36381.07421875	26	9	4	NaN	0.531098	0.0308535161495911	0.589044	334.517639727164	31.712	18.905	0	2879	2959		-1		0				NaN	14776000	0;215146.4;3235629;1.031754E+07;1.396624E+07;1.438339E+07;6610252;2851757;1150559;225786.4;0	1	2908	0	0
20140904-PurClathDigest-1ug-01	MULTI	7	346.14505	2415.9644	35899.6796875	7	4	2	NaN	0.964447	-0.186897101310478	1.997297	346.288614205778	31.743	9.415	0	2903	2943		-1		0				NaN	1273600	0;140732.3;718383.3;479014.2;187414.9;0	0
20140904-PurClathDigest-1ug-01	MULTI	5	347.76098	1733.7685	NaN	5	3	2	NaN	0.768503	-0.0690306640055951	2.638695	347.760804614979	31.728	7.445	0	2903	2935		-1		0				NaN	517800	0;135838.1;456907.3;155717.4;0	0
20140904-PurClathDigest-1ug-01	MULTI	3	349.16328	1044.468	NaN	4	2	2	NaN	0.468017	-0.0524384049178934	4.369851	349.496833798265	31.72	5.53	0	2903	2927		-1		0				NaN	403020	0;138892.3;348671.7;0	0
20140904-PurClathDigest-1ug-01	MULTI	2	322.15587	642.29718	38131.30859375	10	6	2	NaN	0.297182	-0.0382750213318559	1.499403	322.155765794105	31.712	13.185	0	2887	2943		-1		0				NaN	669100	0;61430.87;333749.2;531121.9;625684;211430.1;86495.84;0	0
20140904-PurClathDigest-1ug-01	MULTI	3	338.19426	1011.5609	36015.17578125	41	17	4	NaN	0.560946	0.0556275625837088	0.614132	338.194280543388	31.715	33.755	0	2823	2967		3959	SPVEEVKPK	9	Unmodified	_SPVEEVKPK_	F1MDZ2;O77788	98.1106872558594	6350000	0;85143.52;149007.4;290464.4;171968.1;178525.9;195765.6;263477.7;1070604;2784456;5621437;5930726;6319717;5122521;4813006;2359620;389452.3;97152.73;0	1	2913	0	0
20140904-PurClathDigest-1ug-01	MULTI	7	346.63518	2419.3953	35963.47265625	10	4	4	NaN	0.395336	0.242413847508033	1.782321	346.778177829025	31.745	9.415	0	2903	2943		-1		0				NaN	853250	0;100588.5;786271.1;579777.6;190666.8;0	0
20140904-PurClathDigest-1ug-01	MULTI	5	348.747	1738.6986	33685.82421875	5	3	2	NaN	0.698595	-0.141206132449724	3.957978	348.948515168818	31.73	7.445	0	2903	2935		-1		0				NaN	625680	0;105749.8;432314.9;117655.5;0	0
20140904-PurClathDigest-1ug-01	MULTI	2	320.67414	639.33372	36700.9609375	8	6	2	NaN	0.333724	-0.000369691479932044	2.128951	320.674341717019	31.756	13.24	0	2895	2951		-1		0				NaN	832140	0;96911.07;298476.2;575629.8;438610.4;507170.9;235506;0	0
20140904-PurClathDigest-1ug-01	MULTI	2	342.68785	683.36115	35463.12890625	34	19	3	NaN	0.361148	0.00680154710767056	0.645543	342.687797929223	31.748	37.695	0	2847	3007		-1		0				NaN	6008000	0;114913.3;180726.7;362112.2;491461.4;568262.5;731152.2;1709005;3905127;5681691;5936289;4430538;2494652;889106.2;489826.1;454362.5;359047.9;263733.4;158925.6;0;0	1	2915	0	0
20140904-PurClathDigest-1ug-01	MULTI	2	331.69013	661.36571	38210.49609375	4	2	2	NaN	0.36571	0.0214819555183112	2.919845	331.689942728451	31.814	5.84	0	2927	2951		-1		0				NaN	734950	0;392765.8;687259.2;0	0
20140904-PurClathDigest-1ug-01	MULTI	2	338.24832	674.48208	NaN	5	3	2	NaN	0.482078	0.13181670916174	4.292133	338.247066971921	31.85	7.73	0	2935	2967		-1		0				NaN	233390	0;145798.2;218243.8;53642.31;0	0
20140904-PurClathDigest-1ug-01	MULTI	2	336.24445	670.47434	36238.6953125	11	6	2	NaN	0.474344	0.125926123469753	1.650446	336.244280346299	31.835	13.475	0	2919	2975		-1		0				NaN	2972800	0;238445.5;1288285;2779886;1433356;738434.7;319155.4;0	1	2949	0	0
20140904-PurClathDigest-1ug-01	MULTI	2	348.70569	695.39682	36472.15234375	18	10	2	NaN	0.396824	0.0369415772100865	1.086174	348.705723287693	31.844	20.955	0	2903	2991		-1		0				NaN	2866700	0;69941.43;223422.5;350087.5;1422393;2662568;2165539;1463549;719089.3;258933.4;102971.1;0	1	2942	0	0
20140904-PurClathDigest-1ug-01	MULTI	3	319.19808	954.57242	39220.625	9	6	2	NaN	0.572421	0.0933174464048534	1.573353	319.198029332306	31.954	13.235	0	2951	3007		-1		0				NaN	734800	0;61789.83;673338.9;650129.6;415635.8;72389.79;124364.5;0	0
20140904-PurClathDigest-1ug-01	MULTI	2	320.20063	638.38671	38791.3828125	9	6	2	NaN	0.386709	0.0530507110348708	2.134189	320.200398824733	31.919	13.385	0	2943	2999		-1		0				NaN	625330	0;200375.7;378823.9;584750.9;193545.8;118394.4;101253.4;0	0
20140904-PurClathDigest-1ug-01	MULTI	1	329.1931	328.18583	36676.76171875	12	8	2	NaN	0.185825	-0.00514033061926966	1.029117	329.193115972446	31.89	17.27	0	2927	2999		-1		0				NaN	782890	0;229656.8;552235.5;633389.9;723098.3;474330.8;508924.5;221723.8;54267.09;0	0
20140904-PurClathDigest-1ug-01	MULTI	3	339.86123	1016.5618	34205.5	20	9	3	NaN	0.561846	0.0542279461170665	0.845383	339.861141514475	31.943	19.075	0	2927	3007		-1		0				NaN	2100700	0;70795.5;90606.85;377321.2;784753.3;2044779;1498394;1310599;688335.9;141558.1;0	0
20140904-PurClathDigest-1ug-01	MULTI	3	349.18838	1044.5433	36929.1953125	6	4	2	NaN	0.543304	0.0228138610505084	2.662797	349.188514473388	31.973	9.525	0	2959	2999		-1		0				NaN	603240	0;119359.8;254977.9;521891.4;91944.77;0	0
20140904-PurClathDigest-1ug-01	MULTI	3	334.52956	1000.5669	36879.328125	15	8	3	NaN	0.566864	0.0666036100165002	0.837063	334.529621667099	31.992	16.8	0	2951	3023		-1		0				NaN	1220300	0;71514.73;372754.3;476274.1;1192132;1187810;414396.3;186028.4;0;0	0
20140904-PurClathDigest-1ug-01	MULTI	2	343.70776	685.40097	33287.90625	7	4	2	NaN	0.400975	0.0456904025006679	0.91716	343.707683799965	32.017	9.43	0	2967	3007		-1		0				NaN	468400	0;77759.06;277248.9;404100.8;435052.2;0	0
20140904-PurClathDigest-1ug-01	MULTI	4	350.93388	1399.7064	35034.76171875	24	13	3	NaN	0.706427	0.0225625174109609	0.805975	350.93395944146	31.991	26.34	0	2935	3047		-1		0				NaN	3023500	0;66688.5;272613.6;475731.8;2433909;1939075;2377208;2781305;1687481;218233.5;220833.8;175346;129858.2;0;0	0
20140904-PurClathDigest-1ug-01	MULTI	5	320.54545	1597.6909	28933.365234375	4	2	2	NaN	0.69089	-0.0840473196828953	4.273803	320.745567146273	32.056	5.43	0	2991	3015		-1		0				NaN	452990	0;326566;153882.2;0	0
20140904-PurClathDigest-1ug-01	MULTI	6	331.00244	1979.971	NaN	6	4	2	NaN	0.970983	0.0201963819479261	4.082663	331.170405222542	32.085	9.08	0	2991	3031		-1		0				NaN	316430	0;170118.3;236313.9;202847.1;0;0	0
20140904-PurClathDigest-1ug-01	MULTI	4	337.69012	1346.7314	35849.14453125	20	8	3	NaN	0.731389	0.0718928400003733	1.264909	337.690023811572	32.079	16.685	0	2975	3047		-1		0				NaN	2311300	0;134332.4;527993.4;2136521;1536890;1504675;514648.6;445553.7;53287.26;0	0
20140904-PurClathDigest-1ug-01	MULTI	2	336.68791	671.36127	36467.265625	19	12	2	NaN	0.36127	0.0124437584352108	2.097127	336.687522696257	32.043	24.28	0	2951	3055		-1		0				NaN	3393300	0;49958.74;202993.8;778545.8;1413725;2595626;3173126;2652977;1326255;429927.2;77454.86;102827.1;52663.31;0	0
20140904-PurClathDigest-1ug-01	MULTI	2	343.21575	684.41694	38343.11328125	6	4	2	NaN	0.416937	0.0621053509355534	2.260638	343.215634220043	32.071	9.12	0	2983	3023		-1		0				NaN	653140	0;64581.47;359173.3;606633.6;209570;0	0
20140904-PurClathDigest-1ug-01	MULTI	4	343.93264	1371.7015	36412.30078125	13	7	3	NaN	0.701461	0.0304785759935839	1.588374	344.18359508239	32.086	14.735	0	2983	3047		-1		0				NaN	2663600	0;110461.9;2462097;645718.5;831562.3;783959.9;215597.3;0;0	0
20140904-PurClathDigest-1ug-01	MULTI	3	349.84167	1046.5032	36326.921875	8	4	2	NaN	0.503194	-0.0181976283345193	1.242433	349.841737758201	32.063	9.12	0	2983	3023		-1		0				NaN	1591800	0;476037.8;1377109;1279871;592357.9;0	0
20140904-PurClathDigest-1ug-01	MULTI	3	347.50892	1039.5049	35241.1640625	18	7	3	NaN	0.504929	-0.0132432549582973	0.600704	347.508918813379	32.061	14.825	0	2975	3039		2589	LGDSHDLQR	9	Unmodified	_LGDSHDLQR_	E1BFB0	89.3951416015625	7777900	0;174147.8;3117960;7536540;4988655;2417041;644347.9;192284.5;0	1	3006	0	0
20140904-PurClathDigest-1ug-01	MULTI	4	346.92964	1383.6895	36185.76171875	14	9	2	NaN	0.689468	0.0129710945973329	2.292231	346.929713355201	32.065	18.65	0	2959	3039		-1		0				NaN	599190	0;130756.5;87566.72;124373.8;272872.2;455613.3;450864.1;498914.9;102342.6;70245.3;0	0
20140904-PurClathDigest-1ug-01	MULTI	3	332.16409	993.47045	37870.55859375	19	9	3	NaN	0.470448	-0.026548834546702	0.705264	332.164151124391	32.169	18.42	0	2999	3079		-1		0				NaN	2299100	0;376380.8;932463.9;2237929;2087723;1811856;977806.5;333780.2;126278.7;40179.73;0	0
20140904-PurClathDigest-1ug-01	MULTI	2	333.68259	665.35062	34736.2890625	25	11	3	NaN	0.350622	0.004560287752156	1.219015	333.682366431743	32.173	21.995	0	2999	3095		-1		0				NaN	4988100	0;1162035;2964685;3607715;4404299;4935736;1925845;744043.3;322760.6;307582.4;148126.7;122203.9;0	1	3037	0	0
20140904-PurClathDigest-1ug-01	MULTI	5	346.36351	1726.7812	35869.6328125	4	2	2	NaN	0.781159	-0.0531604827660885	2.340537	346.363607035588	32.195	5.615	0	3023	3047		-1		0				NaN	1112500	0;155025.8;768682.3;0	0
20140904-PurClathDigest-1ug-01	MULTI	2	342.19533	682.37611	29888.3515625	51	24	4	NaN	0.376113	0.0222196968427397	0.811142	342.195532429589	32.176	46.51	0	2919	3119		-1		0				NaN	69329000	0;67222.23;172790.9;279381.9;521818.8;346010.3;310474.9;324802.2;268459.3;159676.8;1221048;9075380;3.615058E+07;6.086067E+07;6.799679E+07;6.921529E+07;3.518758E+07;1.43232E+07;6785420;2695594;1439834;1233458;889167.5;688305.9;785526.9;0	1	3013	0	0
20140904-PurClathDigest-1ug-01	MULTI	3	320.15335	957.43821	38247.91015625	9	6	2	NaN	0.438214	-0.0422075030236329	0.847217	320.153367978838	32.207	12.97	0	3015	3071		-1		0				NaN	1636700	0;103746.7;393267.7;1448104;525289.8;312742.5;55666.88;0	0
20140904-PurClathDigest-1ug-01	MULTI	3	325.82247	974.44558	36962.9453125	19	10	3	NaN	0.445578	-0.0426674423659961	0.965339	325.822451886185	32.212	20.205	0	3015	3103		-1		0				NaN	4149500	0;759391;2895057;3784768;2833531;1075746;615336.8;288746.4;79649.57;75310.33;0;0	0
20140904-PurClathDigest-1ug-01	MULTI	3	335.18543	1002.5344	35428.11328125	23	11	4	NaN	0.534447	0.0332810407256829	0.953375	335.185285162274	32.32	21.675	0	3047	3143		2925	LSKEEIER	8	Unmodified	_LSKEEIER_	P0CB32;Q27965;Q27975	98.4751892089844	4332100	0;1524394;4216860;3873600;1934254;699669.6;185892.5;33656.16;55070.06;67995.25;80920.45;0;0	1	3070	0	0
20140904-PurClathDigest-1ug-01	MULTI	3	337.82595	1010.456	29712.986328125	7	4	2	NaN	0.456031	-0.0487788226442945	3.542043	338.160414840942	32.327	9.145	0	3055	3095		-1		0				NaN	425780	0;213458.8;373920.4;236134.3;49744.51;0	0
20140904-PurClathDigest-1ug-01	MULTI	3	343.82978	1028.4675	36010.56640625	8	6	2	NaN	0.467523	-0.0455719055921691	2.375747	343.829673212951	32.334	12.73	0	3055	3111		-1		0				NaN	632890	0;315322.9;561460.6;547537;104804.3;72795.3;0;0	0
20140904-PurClathDigest-1ug-01	MULTI	2	330.68176	659.34898	36870.33984375	15	9	2	NaN	0.348975	0.00567468672807081	1.230041	330.681731679672	32.317	18.345	0	3031	3111		-1		0				NaN	891520	0;52763.35;111110.7;383753.2;844767.9;833671.8;732029.6;244147.9;45717.92;60406.03;0	0
20140904-PurClathDigest-1ug-01	MULTI	3	339.86201	1016.5642	37497.0625	10	7	2	NaN	0.564201	0.0565814854139717	2.211141	339.862204331043	32.35	14.665	0	3039	3103		-1		0				NaN	565390	0;59284.52;72895.89;189562.7;267651.1;391869.4;496524.6;0;0	0
20140904-PurClathDigest-1ug-01	MULTI	2	339.18444	676.35432	37606.61328125	23	14	2	NaN	0.354321	0.00319838408597661	1.078572	339.184380978641	32.341	27.235	0	3031	3151		-1		0				NaN	798170	0;310134.3;452383.4;624050.7;395914.3;555277.9;741339.7;459833.3;358011.4;295115.9;302682.1;91729.22;94110.29;98776.44;0;0	0
20140904-PurClathDigest-1ug-01	MULTI	5	342.76067	1708.767	36002.3515625	4	2	2	NaN	0.766977	-0.0590557814637123	2.106786	342.760693914504	32.378	5.44	0	3071	3095		-1		0				NaN	1637400	0;277089.7;1143352;0	0
20140904-PurClathDigest-1ug-01	MULTI	5	346.56331	1727.7802	35030.5625	5	3	2	NaN	0.780189	-0.054590182832726	0.863459	346.563391061742	32.382	7.235	0	3071	3103		-1		0				NaN	4264200	0;228108.4;2946341;41477.46;0	0
20140904-PurClathDigest-1ug-01	MULTI	3	349.83333	1046.4782	35844.296875	14	5	3	NaN	0.47816	-0.0432198480768875	0.897897	349.833343992521	32.337	10.94	0	3055	3103		-1		0				NaN	2656200	0;1275432;2573803;2009727;841849.1;255296.2;0	0
20140904-PurClathDigest-1ug-01	MULTI	2	326.68712	651.35969	38932.38671875	8	5	2	NaN	0.359694	0.0200684524482995	1.473097	326.687110283035	32.377	10.89	0	3063	3111		-1		0				NaN	565130	0;220315.2;475510.3;471264.9;243239.1;40469.64;0	0
20140904-PurClathDigest-1ug-01	MULTI	1	332.17748	331.17021	43802.5546875	11	8	2	NaN	0.170208	-0.0221300467110837	4.335539	332.176375785757	32.433	16.165	0	3063	3135		-1		0				NaN	267040	0;60440.91;160714.4;161489.4;169553.5;83314.45;50196.69;169527.8;218241.2;0	0
20140904-PurClathDigest-1ug-01	MULTI	2	337.21531	672.41607	NaN	5	3	2	NaN	0.416067	0.0667555957829791	2.622324	337.21497176817	32.394	7.235	0	3071	3103		-1		0				NaN	967090	0;330522.5;644578;904337.9;0	0
20140904-PurClathDigest-1ug-01	MULTI	3	334.85771	1001.5513	38701.3203125	11	7	2	NaN	0.551303	0.0505892312370406	2.768581	334.8573090137	32.42	14.385	0	3063	3127		-1		0				NaN	664950	0;38340.13;106260.9;466399.6;583953.1;396746.2;245283.5;117897.3;0	0
20140904-PurClathDigest-1ug-01	MULTI	2	337.20538	672.3962	27494.330078125	18	11	3	NaN	0.3962	0.0468981520577927	1.731434	337.20528381257	32.39	21.995	0	3015	3111		-1		0				NaN	2977900	0;80767.1;147248.4;213729.6;152733.4;149267.1;246623.8;456694.4;829385.9;803068.1;1728043;698313.5;0	0
20140904-PurClathDigest-1ug-01	MULTI	2	325.20536	648.39616	37290.1328125	22	10	3	NaN	0.396162	0.0578995110383858	0.738295	325.205264707305	32.401	19.81	0	3055	3143		-1		0				NaN	3348300	0;207490.3;692909.5;2325833;3002313;3313122;1774288;715621.1;357357.3;60212.81;106892.8;0	0
20140904-PurClathDigest-1ug-01	MULTI	3	340.52584	1018.5557	35361.74609375	18	9	3	NaN	0.555688	0.0471523206033453	2.053935	340.525581606968	32.464	17.915	0	3071	3151		-1		0				NaN	555420	0;198933.6;127923.9;249479.9;528110.7;540644.6;350670.9;165323.9;209029.5;98592.87;0	0
20140904-PurClathDigest-1ug-01	MULTI	2	349.20348	696.39241	35335.3359375	11	6	2	NaN	0.392408	0.0320674628728739	1.16384	349.203477557785	32.417	12.52	0	3071	3127		-1		0				NaN	1057300	0;167292.6;922273.6;982052.6;705482.5;345306.9;64206.53;0	0
20140904-PurClathDigest-1ug-01	MULTI	2	336.24454	670.47453	37045.9140625	14	6	3	NaN	0.474532	0.12611344767447	1.018381	336.244405506583	32.468	12.435	0	3079	3135		-1		0				NaN	1658500	0;106325.9;716961.8;1421105;1641120;1335022;412847.6;0	0
20140904-PurClathDigest-1ug-01	MULTI	2	346.14723	690.2799	34996.3984375	17	8	3	NaN	0.279899	-0.0776294724270201	0.610808	346.147201235869	32.46	16.105	0	3071	3143		-1		0				NaN	2997800	0;165648.4;1039842;2962037;2938076;2721326;2295508;1328141;530918.3;0	0
20140904-PurClathDigest-1ug-01	MULTI	2	337.19833	672.3821	27271.923828125	13	7	3	NaN	0.382104	0.0328080485026021	1.094956	337.198174750052	32.514	14.275	0	3095	3159		-1		0				NaN	8536900	0;29938.53;6121442;8447306;7684977;2730720;1098870;322146.4;0	0
20140904-PurClathDigest-1ug-01	MULTI	2	338.71062	675.40669	36678.53515625	18	7	4	NaN	0.406689	0.0560018935439075	0.644932	338.710550714247	32.535	14.295	0	3103	3167		-1		0				NaN	13418000	0;1531802;8587096;1.33958E+07;7347239;2409371;756647.6;171624.6;0	1	3126	0	0
20140904-PurClathDigest-1ug-01	MULTI	3	346.84547	1037.5146	35152.67578125	8	5	2	NaN	0.514588	-0.00266850611069458	2.237965	346.84528415391	32.515	10.665	0	3095	3143		-1		0				NaN	1377000	0;21431.93;357068.8;1306460;1191261;312168.7;0	0
20140904-PurClathDigest-1ug-01	MULTI	2	346.72588	691.43721	36154.57421875	6	4	2	NaN	0.437209	0.0791474814647017	1.21469	346.725984269926	32.531	8.89	0	3111	3151		-1		0				NaN	859320	0;499185;798137.5;208031.1;164325.1;0	0
20140904-PurClathDigest-1ug-01	MULTI	2	323.1817	644.34884	37303.25	8	6	2	NaN	0.348839	0.01243806302341	1.012597	323.181668691176	32.592	12.625	0	3119	3175		-1		0				NaN	4335600	0;118675.3;2593933;4054284;1712785;554513.2;136576.2;0	0
20140904-PurClathDigest-1ug-01	MULTI	2	326.29233	650.57011	41421.3828125	6	4	2	NaN	0.570114	0.230851344757411	4.367069	326.293797146648	32.592	9.01	0	3127	3167		-1		0				NaN	460650	0;354536.4;430756.8;287709.3;81480.48;0	0
20140904-PurClathDigest-1ug-01	MULTI	1	326.03869	325.03142	36563.46875	14	11	2	NaN	0.031418	-0.158096404597472	1.196216	326.03854407715	32.618	22.375	0	3119	3215		-1		0				NaN	4646300	0;753751.3;3195012;3782856;3797233;2002442;1238468;838613.6;461831.3;227287.8;131590.9;38703.05;0	0
20140904-PurClathDigest-1ug-01	MULTI	7	349.88046	2442.1123	NaN	4	2	2	NaN	0.112313	-0.0510587637368189	1.19079	350.023559966812	32.576	5.395	0	3127	3151		-1		0				NaN	664650	0;368686.9;341153.1;0	0
20140904-PurClathDigest-1ug-01	MULTI	7	349.921	2442.3961	37150.1328125	4	2	2	NaN	0.396092	0.232589331133113	3.053759	350.064639787451	32.577	5.395	0	3127	3151		-1		0				NaN	993500	0;528201.5;551101.6;0	0
20140904-PurClathDigest-1ug-01	MULTI	5	326.53286	1627.6279	36786.8515625	33	11	3	NaN	0.627917	-0.160791552864112	1.831064	326.733339825893	32.623	22.375	0	3119	3215		-1		0				NaN	10806000	0;2315731;9268727;1.103805E+07;1.071446E+07;6260912;4053259;3272517;1543189;691227.9;397626.3;202305.9;0	0
20140904-PurClathDigest-1ug-01	MULTI	5	327.13728	1630.65	38239.5625	18	10	2	NaN	0.650002	-0.140096914042488	2.016634	327.136955823558	32.621	20.44	0	3119	3207		-1		0				NaN	2629100	0;639589.9;1858676;1871950;1715511;1268701;780913.5;658183.6;390663.9;89437.64;84974.49;0	0
20140904-PurClathDigest-1ug-01	MULTI	3	326.89791	977.67191	37514.6171875	14	10	2	NaN	0.671912	0.182182860650414	1.552259	326.8981988579	32.624	20.44	0	3119	3207		-1		0				NaN	1738500	0;489598.4;1278945;1462111;1526767;918223.1;674635.4;528983.3;314273.9;130527.7;90892.72;0	0
20140904-PurClathDigest-1ug-01	MULTI	3	327.09922	978.27582	35523.55078125	13	10	2	NaN	0.275816	-0.214190411256027	2.825849	327.099955924611	32.625	20.44	0	3119	3207		-1		0				NaN	1071600	0;361825.2;941116.6;736361.3;839738;597835.1;526269.1;354927.3;240574.5;91079.19;95583.31;0	0
20140904-PurClathDigest-1ug-01	MULTI	5	326.36845	1626.8059	37270.92578125	45	12	4	NaN	0.805877	0.0175464432206809	2.086275	326.568620018881	32.621	24.345	0	3119	3223		-1		0				NaN	24661000	0;3716676;1.884582E+07;2.445262E+07;2.388472E+07;1.263993E+07;7504532;5747418;2939404;1199052;652488.3;327142.4;32342.28;0	0
20140904-PurClathDigest-1ug-01	MULTI	5	327.17435	1630.8354	38871.5546875	19	9	3	NaN	0.835365	0.0451802514940027	2.414169	327.173756089426	32.615	18.4	0	3119	3199		-1		0				NaN	2482200	0;379453.5;1733894;2219916;1930957;1166301;593357.7;515306.9;180194;67311.92;0	0
20140904-PurClathDigest-1ug-01	MULTI	5	326.20393	1625.9833	37146.4765625	74	34	5	NaN	0.983292	0.195339874628189	2.044201	326.403993446528	32.609	65.065	0	2935	3215		-1		0				NaN	26918000	0;163044.7;143960;226852.9;183846.7;229523.8;267194.3;268395;186752.6;244417;154486.5;223464;172604.7;200127.3;271524.9;190932.5;241201;239544.9;247954.2;202958.1;224239.2;255678.2;338916.7;225420.1;4233893;2.065558E+07;2.687091E+07;2.588901E+07;1.391252E+07;8054145;6064218;2896158;1363129;742271.1;380389.7;0	0
20140904-PurClathDigest-1ug-01	MULTI	2	327.20988	652.40522	37951.2578125	10	8	2	NaN	0.405216	0.0651098883230361	3.351951	327.210911774042	32.616	16.38	0	3119	3191		-1		0				NaN	694920	0;89404.7;444523.6;551420.9;649827.6;362034.1;170766.7;135013.2;62076.85;0	0
20140904-PurClathDigest-1ug-01	MULTI	6	333.47323	1994.7957	27782.041015625	5	3	2	NaN	0.795745	-0.161860716938008	3.100735	333.473367459656	32.595	7.195	0	3127	3159		-1		0				NaN	545720	0;169307.4;349830;249048.2;0	0
20140904-PurClathDigest-1ug-01	MULTI	2	333.60091	665.18726	29018.828125	5	3	2	NaN	0.187259	-0.158727051898495	4.343029	333.601863945913	32.597	7.195	0	3127	3159		-1		0				NaN	460020	0;186239.2;430167.2;341780.5;0	0
20140904-PurClathDigest-1ug-01	MULTI	2	350.24727	698.47999	35403.62890625	31	20	3	NaN	0.479988	0.118687292553545	0.56969	350.247207971456	32.59	39.38	0	3111	3279		-1		0				NaN	20470000	0;201752.6;3749863;2.022548E+07;1.877643E+07;6880449;2543878;919439.4;479364.4;74101.09;145938.3;48908.17;44343.8;77054.55;96224.59;93048.69;38267.56;65245.21;86153.22;43531.11;61776.58;0	1	3137	0	0
20140904-PurClathDigest-1ug-01	MULTI	2	321.19186	640.36916	37132.578125	14	7	3	NaN	0.369161	0.034591114821751	4.083726	321.190317666076	32.655	14.88	0	3135	3199		-1		0				NaN	3063000	0;583026.2;2510999;3030842;2211754;1385535;301537;113824;0	0
20140904-PurClathDigest-1ug-01	MULTI	3	329.786	986.33616	38839.484375	7	4	2	NaN	0.336162	-0.157552277946593	1.212999	329.786122354415	32.667	9.165	0	3143	3183		-1		0				NaN	1122800	0;396708.4;986043.1;823201.9;405963.1;0	0
20140904-PurClathDigest-1ug-01	MULTI	2	328.7813	655.54804	NaN	6	4	2	NaN	0.548043	0.206490826976506	3.908767	328.779477900093	32.614	9.01	0	3127	3167		-1		0				NaN	337670	0;144782.4;233582.3;258936.7;223566.3;0	0
20140904-PurClathDigest-1ug-01	MULTI	6	330.02823	1974.1257	36242.6328125	71	54	4	NaN	0.125734	0.177635694777791	0.609403	330.195368926716	32.698	102.385	0	3103	3543		-1		0				NaN	172280000	0;60246.04;789134.1;1272863;838595.1;5009686;7.611294E+07;1.721309E+08;1.594889E+08;1.135745E+08;4.089055E+07;1.490526E+07;6176271;3100907;1938452;2512898;1725443;1511140;1461824;1102257;773156.9;821329.3;786255.1;659328.9;732049;809899.3;522899;520663.3;827991;480356.5;403566.7;518825.8;520042.5;207014.2;319950.2;252909.7;277365.4;334702.6;183383.1;271550.7;318468.7;237176;192701.5;216785.6;2029…	1	3148	0	1
20140904-PurClathDigest-1ug-01	MULTI	6	330.5298	1977.1352	36911.33203125	36	28	3	NaN	0.135153	0.185671029307059	1.700238	330.696899832243	32.685	54.15	0	3103	3335		-1		0				NaN	69739000	0;38551.95;136602.7;87320.55;299110.9;2242135;2.633721E+07;5.937984E+07;5.447068E+07;3.744842E+07;1.231111E+07;3829975;1510296;925827.8;507944.1;697406.5;567914.1;306607.3;391990.7;301600.7;197357.7;252234.2;223187.8;218817.8;206269.3;106762.7;164914.3;146541.1;153061.6;0	0
20140904-PurClathDigest-1ug-01	MULTI	2	329.71552	657.41648	39046.85546875	9	4	3	NaN	0.416478	0.0740659558242669	3.227517	329.716388306822	32.647	9.165	0	3143	3183		-1		0				NaN	874960	0;865771.1;790337.8;418942.8;170621.7;0	0
20140904-PurClathDigest-1ug-01	MULTI	3	330.77315	989.29763	41188.65234375	7	4	2	NaN	0.297632	-0.197444531319661	1.812647	330.772877613342	32.67	9.165	0	3143	3183		-1		0				NaN	759120	0;106653.9;666658.4;573342.9;229004.1;0	0
20140904-PurClathDigest-1ug-01	MULTI	2	331.19822	660.3819	36277.58203125	21	15	2	NaN	0.381896	0.0381202189529404	0.915848	331.198270965316	32.684	30.38	0	3143	3271		-1		0				NaN	10658000	0;4343767;1.023405E+07;9966640;6880263;2357338;861327.2;263692.1;86045.04;134214.2;180433.2;56160.88;44109.43;70405.79;57208.27;56931.79;0	0
20140904-PurClathDigest-1ug-01	MULTI	2	340.17939	678.34423	35561.3046875	11	6	2	NaN	0.344233	-0.0078053585169755	0.606435	340.179326064573	32.585	12.625	0	3119	3175		-1		0				NaN	4622900	0;544741.9;4269914;4293772;1615688;476524.6;116568.7;0	0
20140904-PurClathDigest-1ug-01	MULTI	2	344.20527	686.39598	36853.69140625	15	8	3	NaN	0.395981	0.0402385032560915	0.59012	344.205163992764	32.639	16.66	0	3127	3199		-1		0				NaN	13273000	0;216323.7;3609793;1.311484E+07;9692214;3848931;1198093;321815.3;139693.6;0	1	3154	0	0
20140904-PurClathDigest-1ug-01	MULTI	6	329.82356	1972.8977	36276.42578125	31	5	7	NaN	0.897691	-0.0498421024108211	0.614144	329.990587830231	32.666	11.055	0	3143	3191		-1		0				NaN	13711000	0;4899430;9392480;6767792;3549717;868457.3;0	0
20140904-PurClathDigest-1ug-01	MULTI	3	330.5681	988.68248	37074.8984375	11	5	3	NaN	0.682476	0.187681677355613	2.132043	330.567733942705	32.663	11.055	0	3143	3191		-1		0				NaN	2935400	0;1536377;2857338;2036524;1043836;86303.22;0	0
20140904-PurClathDigest-1ug-01	MULTI	2	330.23327	658.45199	38198.5	10	5	2	NaN	0.451993	0.109104857121906	2.079754	330.232737027045	32.668	11.055	0	3143	3191		-1		0				NaN	3045800	0;1398540;2848112;1998577;1252953;291725.5;0	0
20140904-PurClathDigest-1ug-01	MULTI	1	330.06663	329.05935	36810.63671875	9	5	2	NaN	0.059353	-0.132014362826226	3.659915	330.065486290735	32.672	11.055	0	3143	3191		-1		0				NaN	1161200	0;376867.5;1131728;893004.2;693846.8;75763.02;0	0
20140904-PurClathDigest-1ug-01	MULTI	4	335.37002	1337.451	39901.4921875	6	4	2	NaN	0.450972	-0.204254954378257	3.481471	335.370441496227	32.667	9.165	0	3143	3183		-1		0				NaN	718230	0;167729.8;552480.1;401194.8;199778.4;0	0
20140904-PurClathDigest-1ug-01	MULTI	6	326.69623	1954.1337	37784.54296875	13	9	2	NaN	0.133699	0.194797468122943	1.490653	326.696429013957	32.632	18.4	0	3119	3199		-1		0				NaN	2477400	0;310286.6;780264.9;655343.9;853890.6;766168.9;534288;416438.6;189125.7;98824.19;0	0
20140904-PurClathDigest-1ug-01	MULTI	6	332.14827	1986.8459	37927.20703125	13	7	2	NaN	0.845947	-0.108001914061333	2.919889	332.31603864089	32.736	15.24	0	3151	3215		-1		0				NaN	1635800	0;145515.1;350889.3;890035.1;712512.4;331989.7;212416.5;109000.7;0	0
20140904-PurClathDigest-1ug-01	MULTI	6	332.48654	1988.8756	37272.234375	19	8	3	NaN	0.875603	-0.0792801367927041	3.248412	332.485216099223	32.733	17.21	0	3151	3223		-1		0				NaN	2170900	0;299655.8;724344.6;1848414;1386176;635773.7;371543.7;148823.2;25761.42;0	0
20140904-PurClathDigest-1ug-01	MULTI	6	332.98625	1991.8739	NaN	10	6	2	NaN	0.873868	-0.0823935723640261	2.81117	332.985724589095	32.732	13.44	0	3159	3215		-1		0				NaN	735010	0;350655.4;471176.9;398438.9;267062.8;166647.4;0;0	0
20140904-PurClathDigest-1ug-01	MULTI	5	330.94096	1649.6684	NaN	5	3	2	NaN	0.668405	-0.130442239737931	2.544268	330.940909983557	32.689	7.355	0	3151	3183		-1		0				NaN	529410	0;199125.7;200840.8;298385.5;0	0
20140904-PurClathDigest-1ug-01	MULTI	3	332.4465	994.31768	NaN	9	6	2	NaN	0.317676	-0.179710294169581	3.202694	332.447211342634	32.737	13.44	0	3159	3215		-1		0				NaN	568910	0;128790.4;499617.5;353727.3;174033.1;67521.7;37664.77;0	0
20140904-PurClathDigest-1ug-01	MULTI	2	332.10848	662.20241	39570.43359375	7	4	2	NaN	0.202408	-0.142205582846486	4.353575	332.109567600593	32.733	9.465	0	3159	3199		-1		0				NaN	292390	0;116860.1;247186.3;273415.7;163399.3;0	0
20140904-PurClathDigest-1ug-01	MULTI	1	332.2765	331.26922	NaN	9	5	2	NaN	0.269225	0.0768410644591313	3.280748	332.27859875212	32.722	11.265	0	3151	3199		-1		0				NaN	606060	0;73483.48;226184.5;590654.3;390550.4;189017.5;0	0
20140904-PurClathDigest-1ug-01	MULTI	5	323.52398	1612.5835	36582.7578125	8	5	2	NaN	0.583536	-0.198252307137864	3.167397	323.524582735228	32.736	11.505	0	3159	3207		-1		0				NaN	633500	0;186571.7;569748.8;431168.6;359528.1;41715.44;0	0
20140904-PurClathDigest-1ug-01	MULTI	5	323.81201	1614.0237	NaN	8	5	2	NaN	0.023663	0.24121211775082	3.141585	324.011988753948	32.729	11.505	0	3159	3207		-1		0				NaN	408720	0;152198.3;294650.3;149242;106607.2;39643.59;0	0
20140904-PurClathDigest-1ug-01	MULTI	6	332.18645	1987.0751	38505.83203125	11	7	2	NaN	0.075061	0.121006884781309	2.64897	332.354048541655	32.722	15.24	0	3151	3215		-1		0				NaN	1371400	0;264801;567713.4;879110.5;601928.6;350285.4;92268.15;55902.84;0	0
20140904-PurClathDigest-1ug-01	MULTI	2	332.55993	663.1053	38773.609375	7	5	2	NaN	0.1053	-0.239727989662242	4.32806	332.560977422784	32.753	11.625	0	3167	3215		-1		0				NaN	397220	0;275459.5;371446.3;157804.1;100491.8;40266.11;0	0
20140904-PurClathDigest-1ug-01	MULTI	7	351.15722	2451.0496	NaN	6	3	2	NaN	0.04963	-0.117852433964345	1.730047	351.157514865021	32.737	7.65	0	3167	3199		-1		0				NaN	455290	0;252550.2;186759.9;110751.5;0	0
20140904-PurClathDigest-1ug-01	MULTI	2	332.72939	663.44423	37281.91796875	13	9	2	NaN	0.444225	0.0990409227285909	3.010826	332.729902866721	32.739	19.145	0	3151	3231		-1		0				NaN	868140	0;158928.5;278781.6;811800.9;606031.5;488368;119971.2;50457.34;27941;57432.08;0	0
20140904-PurClathDigest-1ug-01	MULTI	2	323.68712	645.35969	23721.615234375	72	28	5	NaN	0.359694	0.0228286970105955	0.752397	323.687369210193	32.83	54.205	0	3127	3359		-1		0				NaN	63158000	0;67697.57;221017.9;1410739;1.185527E+07;3.194341E+07;6.306972E+07;6.012604E+07;4.824403E+07;4.099469E+07;3.512387E+07;2.845204E+07;3.799539E+07;2.301249E+07;1.877304E+07;1.858103E+07;1.496276E+07;8563210;3892983;2494013;2159742;1790193;1058532;1098997;420128;364188.2;312733.2;196036.8;87273.13;0	2	3160;3225	0;0	0;0
20140904-PurClathDigest-1ug-01	MULTI	2	324.68166	647.34877	22562.16015625	30	18	2	NaN	0.348774	0.0109930966625598	1.015326	324.681694539556	32.824	36.195	0	3151	3303		-1		0				NaN	3214300	0;403644.6;1273225;3005736;1694490;1410511;1314600;1038022;1325024;2069179;1195684;606636.7;516307.3;1062384;232991.8;88697.42;162992.9;0;0;0	0
20140904-PurClathDigest-1ug-01	MULTI	2	333.06846	664.12237	39050.1171875	12	7	2	NaN	0.122374	-0.223122366896746	3.178753	333.068750275807	32.729	15.24	0	3151	3215		-1		0				NaN	850640	0;100596.3;393944.9;795443.9;451703.8;263789.9;147792.7;62259.04;0	0
20140904-PurClathDigest-1ug-01	MULTI	3	336.84773	1007.5214	35960.71875	40	14	4	NaN	0.521372	0.0179122397373703	0.56907	336.847654709871	32.777	28.46	0	3143	3263		-1		0				NaN	4083000	0;1128620;1415037;2106030;3687463;4092379;4685828;4063546;4072286;1734600;1316677;425005.4;200724.9;109999.3;43232;0	1	3182	0	0
20140904-PurClathDigest-1ug-01	MULTI	3	330.51376	988.51945	36706.81640625	26	8	4	NaN	0.519446	0.0247268125929168	0.596576	330.513768179433	32.841	17.46	0	3175	3247		-1		0				NaN	6959200	0;670834.1;3145389;5329704;6925960;3807660;2239851;693019.4;169030.4;0	0
20140904-PurClathDigest-1ug-01	MULTI	4	327.17199	1304.6589	36331.51953125	8	4	3	NaN	0.658859	0.018715976671956	2.410766	327.171778439602	32.929	9.565	0	3215	3255		-1		0				NaN	722370	0;686738.3;311656;147722;0;0	0
20140904-PurClathDigest-1ug-01	MULTI	3	345.49566	1033.4651	36171.01953125	12	7	2	NaN	0.465143	-0.0502510435571821	2.134142	345.49544870431	32.898	15.595	0	3183	3247		-1		0				NaN	393800	0;55548.24;101715.3;154712.8;231351.4;340694.7;285196.4;158002.3;0	0
20140904-PurClathDigest-1ug-01	MULTI	2	336.66767	671.3208	35342.70703125	8	5	2	NaN	0.320796	-0.0280115504334617	1.721109	336.66765231507	32.98	11.36	0	3223	3271		-1		0				NaN	450960	0;199001.7;421692.5;260650.1;53784.33;20513.19;0	0
20140904-PurClathDigest-1ug-01	MULTI	2	344.68488	687.3552	33433.703125	4	2	2	NaN	0.355203	-0.000980725886734035	1.763273	344.68482949706	32.995	5.66	0	3231	3255		-1		0				NaN	380230	0;156239.5;353155.4;0	0
20140904-PurClathDigest-1ug-01	MULTI	1	337.20808	336.20081	33718.09765625	12	7	2	NaN	0.200806	0.00615351130642239	3.381713	337.204941591056	32.961	15.385	0	3199	3263		-1		0				NaN	346590	0;82556.64;109260;202116.6;337781;184764.8;265533.2;201805.6;0	0
20140904-PurClathDigest-1ug-01	MULTI	3	332.19421	993.56081	37241.625	26	13	3	NaN	0.560805	0.0637673694091063	0.624138	332.194251647251	32.977	26.95	0	3191	3303		-1		0				NaN	2229900	0;95823.17;141032.1;319630.2;1651080;1598606;1921913;2170576;1320811;629256;223105.4;83774.09;49147.36;0;0	0
20140904-PurClathDigest-1ug-01	MULTI	2	332.69238	663.37021	35832.3125	124	54	4	NaN	0.370211	0.0250609663462456	0.586597	332.692364472632	32.844	102.305	0	3127	3567		-1		0				NaN	151530000	0;148764.1;109845.2;4722837;2.878733E+07;7.475802E+07;1.513187E+08;1.396972E+08;1.113414E+08;9.70902E+07;8.199233E+07;6.218792E+07;8.441702E+07;5.419472E+07;4.468398E+07;4.513575E+07;3.707293E+07;2.220915E+07;1.258861E+07;7741014;5553700;3503439;3468763;2770846;2276700;1674054;1536377;1126779;1364133;1365131;1015433;886802.1;1043721;963399.7;942429.6;684579.8;583550.4;565776.4;497348.4;469737;204…	3	3158;3224;3290	0;0;0	0;0;0
20140904-PurClathDigest-1ug-01	MULTI	3	340.18885	1017.5447	35830.5078125	28	10	4	NaN	0.544707	0.0366366259942197	0.756574	340.18880652	33	21.13	0	3199	3287		-1		0				NaN	3879200	0;111604.5;105305.4;1080602;1065833;2001248;3860648;2581863;1062943;324374.8;102390.8;0	0
20140904-PurClathDigest-1ug-01	MULTI	1	343.20872	342.20145	35862.515625	22	17	2	NaN	0.201447	0.00403474899809453	1.067894	343.208544082936	33.16	33.715	0	3207	3351		-1		0				NaN	724790	0;69600.09;111227.9;46466.38;105878.1;187591.3;224375.7;212788.5;368920.8;706367.2;569648.1;483036.6;487897;383753;250085.6;216472.3;124112.3;59516.88;0	0
20140904-PurClathDigest-1ug-01	MULTI	2	344.19268	686.3708	35327.39453125	18	10	3	NaN	0.3708	0.015069110728632	1.113677	344.192589582425	33.092	20.725	0	3231	3319		-1		0				NaN	1361400	0;12960.62;80722.72;1143896;1345165;797947.6;747722.6;511600.8;300789.6;122698;55561.46;0	0
20140904-PurClathDigest-1ug-01	MULTI	2	309.63904	617.26352	38029.65625	7	4	2	NaN	0.263519	-0.0604220756798668	2.319429	309.639091042741	33.068	9.445	0	3247	3287		-1		0				NaN	310400	0;292743.5;194985.4;172847.7;53056.33;0	0
20140904-PurClathDigest-1ug-01	MULTI	2	318.17381	634.33307	37500.6328125	89	39	5	NaN	0.333074	0.00128085562153046	0.548255	318.173761841537	33.179	74.135	0	3239	3559		-1		0				NaN	49901000	0;461868.4;1.17031E+07;3.381684E+07;4.786249E+07;4.989326E+07;4.568312E+07;3.357012E+07;3.304933E+07;2.855597E+07;1.840869E+07;8684919;3198581;1926666;1140174;767148.9;1004215;780001.9;868024;406727.6;594115.1;505078.4;298676.9;363111.9;270701.3;258624.3;364540.6;293161;284358.5;93005.09;85610.77;255816.3;152909;218181.8;124484.6;122266.3;82626.85;105112.2;38187.04;158054.2;0	2	3257;3321	0;0	0;0
20140904-PurClathDigest-1ug-01	MULTI	2	327.19105	652.36756	NaN	9	7	2	NaN	0.367557	0.0274677883795675	1.373749	327.191129579138	33.107	15.095	0	3247	3311		-1		0				NaN	592770	0;179159.5;391209.1;472757.8;149394.7;91437.3;102687.7;0;0	0
20140904-PurClathDigest-1ug-01	MULTI	4	327.91836	1307.6443	38310.28515625	12	6	3	NaN	0.64433	0.00281318524912422	2.119264	327.918551907361	33.126	13.24	0	3255	3311		-1		0				NaN	1060400	0;155466.9;590330.9;1008060;352823.6;63075.42;44103.49;0	0
20140904-PurClathDigest-1ug-01	MULTI	2	312.6951	623.37565	38008.8125	14	12	2	NaN	0.375647	0.0488942367518348	1.212367	312.695009843941	33.193	24.07	0	3247	3351		-1		0				NaN	284780	0;59734.48;74804.52;81479.94;97008.64;268577.4;237815.3;177631.5;121796.1;196016;34558.89;42733.05;0;0	0
20140904-PurClathDigest-1ug-01	MULTI	2	327.19987	652.38518	42228.69921875	9	5	2	NaN	0.385179	0.0450815695860456	2.413259	327.199796193582	33.155	11.395	0	3263	3311		-1		0				NaN	370150	0;252626.7;386936.4;309782.4;346126.2;127435.3;0	0
20140904-PurClathDigest-1ug-01	MULTI	2	327.17878	652.343	36973.7421875	117	38	5	NaN	0.343004	0.00292590778838075	0.553234	327.17877633271	33.181	72.405	0	3239	3551		-1		0				NaN	184920000	0;2063253;4.175178E+07;1.259153E+08;1.830025E+08;1.848905E+08;1.686001E+08;1.330479E+08;1.262087E+08;1.073795E+08;6.995351E+07;3.570548E+07;1.377573E+07;5521311;4541853;3065389;2632284;2399286;2197464;2253569;2463650;2039680;2326586;1775430;1407914;1322879;1104834;1114535;824133.4;1056062;881575.9;902084.2;720694;994959.6;549450.7;671478.4;558206;360243.8;443573.4;0	2	3256;3320	0;0	0;0
20140904-PurClathDigest-1ug-01	MULTI	3	333.8351	998.48346	32246.380859375	6	4	2	NaN	0.483458	-0.0158441701123593	4.310736	333.834190006814	33.242	9.29	0	3287	3327		-1		0				NaN	225240	0;31429.14;197800.5;160130.9;58038.17;0	0
20140904-PurClathDigest-1ug-01	MULTI	2	336.71107	671.40758	35804.30859375	32	18	3	NaN	0.407581	0.0587335256487904	0.57447	336.711060989114	33.169	35.395	0	3215	3367		-1		0				NaN	14934000	0;182594.4;132746.6;161086.7;279222.9;37916.84;1058666;6059287;1.211505E+07;1.477737E+07;8873628;5970632;3106171;1131002;664928.4;503070.8;69435.96;241355.4;44377.59;0	1	3274	0	0
20140904-PurClathDigest-1ug-01	MULTI	3	339.16963	1014.487	40192.40234375	37	13	4	NaN	0.487049	-0.0196148608243902	1.488251	339.169896453814	33.227	25.99	0	3239	3351		414	ASGPIDHYR	9	Unmodified	_ASGPIDHYR_	E1BKN2	118.323303222656	8201200	0;64789.25;182461.4;343730;937978.3;1241798;3336592;4966382;8162095;7180416;5225509;1776857;311934.8;70217.98;0	1	3294	0	0
20140904-PurClathDigest-1ug-01	MULTI	3	339.51222	1015.5148	NaN	13	6	3	NaN	0.514833	0.0076966710025772	3.209853	339.845827346384	33.25	12.85	0	3287	3343		-1		0				NaN	791840	0;141396.6;770774.5;862714.4;485524.8;118676.6;0;0	0
20140904-PurClathDigest-1ug-01	MULTI	2	338.16419	674.31382	35801.40234375	10	6	2	NaN	0.313819	-0.0363656525624947	1.295746	338.164108159227	33.32	12.615	0	3303	3359		-1		0				NaN	1350200	0;101014.7;516896.8;1262581;683524.5;97122.99;67753.88;0	0
20140904-PurClathDigest-1ug-01	MULTI	2	309.16848	616.3224	38661.3203125	38	15	3	NaN	0.322404	-0.00110467667207104	0.527403	309.168446000313	33.166	29.605	0	3239	3367		-1		0				NaN	15630000	0;35428.01;3330785;9951432;1.484088E+07;1.549514E+07;1.523642E+07;1.156604E+07;1.035836E+07;8208138;5215065;2315738;830018.3;425499.2;305704.3;176776.6;0	1	3262	0	0
20140904-PurClathDigest-1ug-01	MULTI	3	333.16629	996.47704	NaN	7	5	2	NaN	0.47704	-0.0213394596898979	3.19508	333.501063038129	33.277	11.075	0	3287	3335		-1		0				NaN	207630	0;109604;90439.91;106682.2;110008.4;123722.1;0	0
20140904-PurClathDigest-1ug-01	MULTI	3	343.52986	1027.5678	36712.98828125	11	5	3	NaN	0.567756	0.0550751523480812	1.957194	343.529568909886	33.297	10.93	0	3295	3343		-1		0				NaN	534270	0;60499.83;210205.6;432162.7;462222.8;215013.6;0	0
20140904-PurClathDigest-1ug-01	MULTI	3	307.51152	919.51272	37608.48828125	16	7	3	NaN	0.512724	0.0497481248856957	0.628515	307.511412778026	33.291	14.625	0	3287	3351		-1		0				NaN	1985300	0;134448.1;390610.3;1202216;1942467;1787304;699571.6;51386.15;0	0
20140904-PurClathDigest-1ug-01	MULTI	2	339.20799	676.40142	35925.42578125	23	11	3	NaN	0.401421	0.0502763335809959	0.795752	339.207948901972	33.272	22.215	0	3255	3351		-1		0				NaN	1668100	0;29352.9;94641.16;345533.2;624367;717395.3;962409.9;958831.5;1286728;1648210;1417011;567652.1;0	0
20140904-PurClathDigest-1ug-01	MULTI	3	319.51498	955.5231	37828.35546875	5	3	2	NaN	0.523101	0.0435607906640598	2.35858	319.514848798114	33.337	7.15	0	3319	3351		-1		0				NaN	332590	0;250740.2;294269;72784.8;0	0
20140904-PurClathDigest-1ug-01	MULTI	3	349.84538	1046.5143	34669.01171875	11	5	3	NaN	0.514316	-0.00708047002422063	0.893935	349.845219373066	33.343	10.765	0	3311	3359		-1		0				NaN	1106300	0;108736.2;878117.4;1071988;484666.6;151948.7;0	0
20140904-PurClathDigest-1ug-01	MULTI	3	349.86262	1046.566	33013.88671875	13	6	3	NaN	0.566019	0.0445985402814131	2.357204	349.862014715936	33.325	12.615	0	3303	3359		-1		0				NaN	433610	0;126358.8;352780.9;432483;420152.1;220229.6;136568.3;0	0
20140904-PurClathDigest-1ug-01	MULTI	2	333.65498	665.29541	38165.6875	14	9	2	NaN	0.295415	-0.0506210794148956	1.668473	333.654809141581	33.327	18.24	0	3287	3367		-1		0				NaN	459880	0;95837.55;79983.91;180554;299629.7;366268.3;401593.3;430039.3;160911.5;50433.07;0	0
20140904-PurClathDigest-1ug-01	MULTI	2	337.21525	672.41595	NaN	4	2	2	NaN	0.41595	0.0666385911894167	4.362376	337.21510497531	33.394	5.34	0	3335	3359		-1		0				NaN	763180	0;406413.4;713654.2;0	0
20140904-PurClathDigest-1ug-01	MULTI	4	338.67936	1350.6883	36036.94140625	27	9	4	NaN	0.68835	0.0270332360198609	0.660827	338.679248915946	33.329	18.155	0	3295	3375		-1		0				NaN	5006300	0;128248.2;1032183;3331620;4903356;3290758;2340913;707493.3;595485.5;106045;0	0
20140904-PurClathDigest-1ug-01	MULTI	2	342.23141	682.44826	36140.26953125	11	7	2	NaN	0.448262	0.094335437215932	1.416081	342.231347918257	33.344	14.495	0	3295	3359		-1		0				NaN	1668800	0;35281.71;35139.5;241405.5;1065088;1549969;892937.6;323608.8;0	0
20140904-PurClathDigest-1ug-01	MULTI	2	347.68486	693.35516	35806.4921875	11	6	2	NaN	0.355164	-0.00377953026122668	1.715257	347.684755243867	33.337	12.615	0	3303	3359		-1		0				NaN	1335800	0;41832;390427.9;1240650;1084394;630778.1;214380.1;0	0
20140904-PurClathDigest-1ug-01	MULTI	2	301.69212	601.3697	38566.45703125	9	5	2	NaN	0.369696	0.0530655369897204	1.770769	301.691979648224	33.383	10.785	0	3327	3375		-1		0				NaN	2479300	0;867296.3;2338297;1092605;362696.3;68798.16;0	0
20140904-PurClathDigest-1ug-01	MULTI	2	312.21575	622.41695	41412.48046875	6	3	2	NaN	0.416952	0.0906406375872848	2.150747	312.215523525481	33.405	7.165	0	3335	3367		-1		0				NaN	247250	0;233186.6;259838.3;219356.7;0	0
20140904-PurClathDigest-1ug-01	MULTI	2	323.69288	645.3712	NaN	5	3	2	NaN	0.371203	0.0343324315102791	4.12736	323.694060330006	33.436	7.225	0	3343	3375		-1		0				NaN	293990	0;167739.1;222004.3;203364.9;0	0
20140904-PurClathDigest-1ug-01	MULTI	2	337.20554	672.39653	34378.16015625	23	17	2	NaN	0.396534	0.0472315015687172	2.056901	337.205433111603	33.452	32.69	0	3303	3447		-1		0				NaN	935730	0;52328.57;875007.2;531195.4;624403.9;853082.7;880787.2;679275.4;431520.8;340911.2;307205.1;525997.3;447788.8;454409.3;695833.8;319087.8;139700.2;70263.74;0	0
20140904-PurClathDigest-1ug-01	MULTI	4	340.94108	1359.7352	35740.60546875	63	26	5	NaN	0.735221	0.0697423183480623	0.603388	340.941138311414	33.412	50.08	0	3311	3527		4528	VDKLDASESLRK	12	Unmodified	_VDKLDASESLRK_	P49951;F1MPU0	63.5213394165039	49133000	0;286546.5;5423627;2.337538E+07;4.470687E+07;4.889806E+07;4.46481E+07;1.362833E+07;2148870;987654.1;520676.8;1083614;510684.8;753661;904885.3;426320.1;571064.3;147626.8;152742.9;64402.57;212213.8;245749.9;275340.7;151139.2;266503.9;126044.9;127190;0	1	3336	0	0
20140904-PurClathDigest-1ug-01	MULTI	1	342.20205	341.19478	35675.63671875	10	8	2	NaN	0.194777	-0.00217251488521697	1.646578	342.201776015941	33.454	16.22	0	3335	3407		-1		0				NaN	982360	0;254340;665591.3;957393.6;490624.2;417548.3;305297.2;179200.4;105403.5;0	0
20140904-PurClathDigest-1ug-01	MULTI	2	306.68936	611.36416	33123.7421875	65	33	4	NaN	0.364162	0.0429340777973266	0.604541	306.689353781224	33.484	62.305	0	3327	3599		-1		0				NaN	45943000	0;84819.59;1.206042E+07;3.769714E+07;4.764176E+07;4.58935E+07;3.384688E+07;2.32808E+07;1.570115E+07;9860204;6206670;3614982;1271719;986638.8;492622.8;417959.8;354497;426837.6;276921.9;281427.9;247422.6;219487.8;230173.8;233340.6;145570.9;110275.1;312032.7;176718.8;83948.31;89979.94;95595.52;64719.14;199478.6;70168.2;0	2	3346;3412	0;0	0;0
20140904-PurClathDigest-1ug-01	MULTI	3	332.51811	994.53251	36901.875	8	6	2	NaN	0.532513	0.0350275972082272	1.51067	332.517985034448	33.44	12.585	0	3335	3391		-1		0				NaN	492320	0;38063.88;432356.6;473055.5;353929.6;111001.2;0;0	0
20140904-PurClathDigest-1ug-01	MULTI	4	315.45982	1257.8102	NaN	6	5	2	NaN	0.810161	0.191568518478562	4.095358	315.711490570935	33.461	10.795	0	3335	3383		-1		0				NaN	340510	0;59689.57;107297.4;154905.2;281097;41065.4;0	0
20140904-PurClathDigest-1ug-01	MULTI	2	315.56193	629.10931	NaN	4	2	2	NaN	0.109313	-0.220077765072574	4.235613	315.563431723828	33.479	5.455	0	3359	3383		-1		0				NaN	414720	0;387811.4;304164;0	0
20140904-PurClathDigest-1ug-01	MULTI	6	315.68125	1888.0438	NaN	4	2	2	NaN	0.043831	0.135331298492247	3.252984	315.680786546203	33.48	5.455	0	3359	3383		-1		0				NaN	470970	0;349934.3;312438.9;0	0
20140904-PurClathDigest-1ug-01	MULTI	3	342.1794	1023.5164	34401	11	6	2	NaN	0.516363	0.00554541138478726	1.343328	342.179353977342	33.422	12.58	0	3327	3383		-1		0				NaN	691220	0;166723.8;343970.6;450447.6;607028.6;286362.6;230146.3;0	0
20140904-PurClathDigest-1ug-01	MULTI	2	315.69445	629.37435	36980.16796875	94	44	5	NaN	0.374355	0.044842665731494	0.595392	315.694442244384	33.491	82.85	0	3327	3687		-1		0				NaN	167770000	0;679817.9;3.645203E+07;1.214437E+08;1.677463E+08;1.366723E+08;1.121546E+08;7.658126E+07;4.945982E+07;3.703776E+07;1.820022E+07;1.429853E+07;6009215;3031603;2483049;1838481;1726849;1633106;1413925;1148362;1492274;1109130;867612.8;827999.5;962602.2;727793.1;827119.2;619024.7;433606.3;378025;348714.8;389196;379018.2;325415.1;469586.4;138640.3;180897.8;193018.6;249567.4;120531.9;206385.5;269674.5;16…	2	3344;3408	0;0	0;0
20140904-PurClathDigest-1ug-01	MULTI	2	329.20551	656.39646	36749.1015625	14	8	3	NaN	0.39646	0.0545175023283946	0.739167	329.205452637863	33.517	16.25	0	3351	3423		-1		0				NaN	1478700	0;371670.3;716019;1382745;1219259;876587.4;398523;115575.6;81519.55;0	0
20140904-PurClathDigest-1ug-01	MULTI	1	322.18697	321.17969	36684.18359375	9	7	2	NaN	0.17969	-0.00805287157243129	1.200557	322.187177392214	33.583	14.445	0	3367	3431		-1		0				NaN	705470	0;181458;264382.1;583651.8;692259.2;395600.4;311630.6;204200.6;0	0
20140904-PurClathDigest-1ug-01	MULTI	4	337.42305	1345.6631	34962.51953125	9	5	2	NaN	0.663098	0.00409289426761461	2.872515	337.423311631421	33.6	10.815	0	3383	3431		-1		0				NaN	773250	0;145682.9;594804.6;199449.4;170567.1;45656.5;0	0
20140904-PurClathDigest-1ug-01	MULTI	2	324.66204	647.30952	36429.57421875	15	12	2	NaN	0.30952	-0.0282428292641725	1.43439	324.662085409924	33.531	23.4	0	3319	3423		-1		0				NaN	782680	0;98151.22;183957.5;181951.5;278476.3;190541;159683.9;95520.15;288611;622398.8;731893.8;378022.8;230700.6;0	0
20140904-PurClathDigest-1ug-01	MULTI	2	300.17188	598.3292	NaN	6	4	2	NaN	0.329205	0.0139735173102054	4.207523	300.171781901371	33.657	9.095	0	3399	3439		-1		0				NaN	328870	0;146990.8;310161.6;108179.5;159195.2;0	0
20140904-PurClathDigest-1ug-01	MULTI	3	303.83968	908.49722	37772.09765625	21	9	3	NaN	0.49722	0.0393111406738171	0.614515	303.839699067103	33.577	18.165	0	3359	3439		-1		0				NaN	7995900	0;130328.6;727004.4;2660155;5200615;7823408;2603616;1401902;293266.2;81966.96;0	0
20140904-PurClathDigest-1ug-01	MULTI	2	304.15807	606.30159	37964.5078125	29	12	3	NaN	0.301591	-0.0173079800044889	0.647718	304.158028722254	33.55	23.505	0	3335	3439		-1		0				NaN	6389200	0;143449.4;759890.5;1455814;3131076;4649129;5164331;6334163;6184970;4329406;2404993;818853.9;258458.2;0	0
20140904-PurClathDigest-1ug-01	MULTI	2	313.1633	624.31205	36942.59765625	70	38	4	NaN	0.312054	-0.015129097361978	0.488748	313.163283863134	33.562	71.49	0	3327	3639		-1		0				NaN	94030000	0;245502.2;2763233;1.025983E+07;2.242467E+07;4.055999E+07;7.011334E+07;8.187968E+07;9.061703E+07;9.392961E+07;5.816022E+07;3.636033E+07;1.089004E+07;3203179;1502093;854314.8;804863;772045;778274.2;962556.3;1102657;705238.9;751648.4;790082.6;717245.3;553879.3;550403.6;330708.6;362460.3;334486.4;303420;261729;452776.4;228702.3;141345.9;193252.4;366326.6;426787.6;637297.3;0	2	3354;3416	0;0	0;0
20140904-PurClathDigest-1ug-01	MULTI	2	317.60639	633.19822	37789.71484375	7	5	2	NaN	0.198224	-0.133047160445585	2.174198	317.606205923745	33.644	10.92	0	3391	3439		-1		0				NaN	671280	0;47585.03;259146.2;627716.3;199368.8;43339.94;0	0
20140904-PurClathDigest-1ug-01	MULTI	2	333.66758	665.32061	35583.55078125	14	9	2	NaN	0.320612	-0.0254355174173497	1.389072	333.667442983842	33.585	18.06	0	3351	3431		-1		0				NaN	981640	0;69707.83;262957.9;364028.6;342516.1;290719.1;475158.6;842244.8;917943.3;108639.4;0	0
20140904-PurClathDigest-1ug-01	MULTI	2	344.21135	686.40815	36123.43359375	5	3	2	NaN	0.408153	0.052405346897558	2.203959	344.211641453866	33.617	7.215	0	3391	3423		-1		0				NaN	341970	0;230560.9;278081.5;205339.9;0	0
20140904-PurClathDigest-1ug-01	MULTI	2	345.21347	688.41238	37548.24609375	7	4	2	NaN	0.412381	0.0557114753665928	2.375997	345.213414739218	33.607	9.005	0	3383	3423		-1		0				NaN	438560	0;152785.1;407339.5;400609.3;302190;0	0
20140904-PurClathDigest-1ug-01	MULTI	2	301.19974	600.38492	40249.98828125	5	3	2	NaN	0.384923	0.0687460259399586	1.931046	301.199635391343	33.667	7.285	0	3407	3439		-1		0				NaN	692370	0;564247.8;652982.3;162070.2;0	0
20140904-PurClathDigest-1ug-01	MULTI	2	323.68695	645.35934	33972.60546875	29	21	2	NaN	0.359341	0.0224757502031707	0.924738	323.686891716558	33.729	41.07	0	3367	3543		-1		0				NaN	1571300	0;207454;237160.1;44379.85;281600;224966.9;970827.4;1469349;872905.1;507479.3;473313.3;416737.4;285237.6;155983.9;136000.4;179124.8;138957.2;62286.34;69317.23;75044.5;200935.5;80613.33;0	0
20140904-PurClathDigest-1ug-01	MULTI	2	322.7022	643.38985	38412.8046875	10	6	2	NaN	0.389853	0.0538936988840533	1.450066	322.702103318262	33.62	12.71	0	3383	3439		-1		0				NaN	1286100	0;236998.9;812404.5;1202614;934138.4;268396.9;91860.28;0	0
20140904-PurClathDigest-1ug-01	MULTI	2	333.18449	664.35443	34428.81640625	8	4	3	NaN	0.354425	0.00882234247694669	1.935424	333.184660020314	33.684	9.195	0	3407	3447		-1		0				NaN	494670	0;176012.7;489474.4;292782.2;79495.53;0	0
20140904-PurClathDigest-1ug-01	MULTI	1	338.1781	337.17082	35684.2265625	4	2	2	NaN	0.170819	-0.0242797241873518	3.91211	338.17625720985	33.66	5.39	0	3407	3431		-1		0				NaN	188350	0;183562.4;151927.9;0	0
20140904-PurClathDigest-1ug-01	MULTI	2	303.188	604.36145	37134.12109375	7	4	2	NaN	0.361455	0.0434483911577672	1.895725	303.188071123825	33.681	9.195	0	3407	3447		-1		0				NaN	1183000	0;265760.9;1115673;391290.2;84826;0	0
20140904-PurClathDigest-1ug-01	MULTI	2	308.67632	615.33808	36027.86328125	27	21	2	NaN	0.33808	0.0150243286097975	0.861255	308.676318208601	33.687	40.965	0	3375	3551		-1		0				NaN	2056600	0;356832.9;566949.5;878417.4;1133045;1939605;1450980;711388.6;573538.9;381491;169596.3;92757.41;70903.93;123277.8;175651.6;125572.8;75493.91;92165.87;0;0;0;0;0	0
20140904-PurClathDigest-1ug-01	MULTI	1	310.17623	309.16895	37509.3671875	30	20	2	NaN	0.168951	-0.0132668669221516	0.606123	310.176161471302	33.562	39.06	0	3335	3503		-1		0				NaN	5126200	0;184215.7;326147.3;1249200;2309593;3373681;4531403;5030133;5010045;3562488;2130267;751348.9;228705.4;125784.5;80624.52;136688.1;118601.5;124678.6;68261.47;165367.7;117490.5;0	0
20140904-PurClathDigest-1ug-01	MULTI	2	311.66332	621.3121	37645.953125	8	6	2	NaN	0.312096	-0.013707710741528	1.513276	311.663290239649	33.682	13.17	0	3407	3463		-1		0				NaN	1337400	0;332936.5;1261297;535960.9;47416.33;41206.55;0;0	0
20140904-PurClathDigest-1ug-01	MULTI	2	342.21311	682.41167	37280.6953125	8	7	2	NaN	0.411669	0.0577599583419897	1.488612	342.213112941363	33.719	15.33	0	3407	3471		-1		0				NaN	348770	0;122482.3;151583.8;323940.1;214426.6;96390.58;82463.01;0;0	0
20140904-PurClathDigest-1ug-01	MULTI	2	344.20469	686.39484	35760.1328125	9	7	2	NaN	0.394836	0.0390939515696118	2.780119	344.205095042492	33.742	15.495	0	3415	3479		-1		0				NaN	493190	0;78596.48;279174.7;458075.2;139302.6;64356.84;53421.72;40611.25;0	0
20140904-PurClathDigest-1ug-01	MULTI	1	339.23875	338.23148	35713.8828125	22	15	2	NaN	0.231477	0.0358906553644829	0.907325	339.238760941475	33.849	30.25	0	3407	3535		-1		0				NaN	616240	0;160233.6;392586.7;236313.7;194902.5;356238.3;326964.3;441264.6;561261.8;314706.3;503632.7;352167.9;213374.8;134672.9;88548.24;58389.05;0	0
20140904-PurClathDigest-1ug-01	MULTI	2	344.69738	687.3802	36363.74609375	25	15	3	NaN	0.380203	0.0240081411287747	0.780837	344.697305779746	33.939	29.935	0	3439	3567		-1		0				NaN	1792400	0;251808;364236.4;916664.4;963064.5;1306445;1664792;882558.5;1123193;531142.8;140194.5;106662.5;187575.2;91972.6;169672;199546.7;0	0
20140904-PurClathDigest-1ug-01	MULTI	4	345.92701	1379.6789	36117.375	20	11	2	NaN	0.678938	0.00428539185986665	1.316265	345.927186243496	33.818	22.92	0	3415	3511		-1		0				NaN	896400	0;511886.6;388595;324549.6;326547.3;144679.4;242074.9;309530.8;174207;681611;45855.55;148941.4;0	0
20140904-PurClathDigest-1ug-01	MULTI	2	316.19133	630.3681	47050.56640625	13	8	2	NaN	0.368105	0.0381352219275186	2.703631	316.191045355526	33.988	17.08	0	3463	3535		-1		0				NaN	573000	0;52148.52;179116.3;408260.9;206702.4;445165.8;535818.1;237841.4;43258.38;0	0
20140904-PurClathDigest-1ug-01	MULTI	3	334.20583	999.59566	NaN	4	2	2	NaN	0.595664	0.0958499951536851	2.543149	334.205556326576	34.011	5.6	0	3495	3519		-1		0				NaN	196670	0;172710.5;132419.3;0	0
20140904-PurClathDigest-1ug-01	MULTI	4	347.94249	1387.7409	35460.95703125	11	6	2	NaN	0.740867	0.0625059366032019	1.664898	347.942489323958	34.031	12.875	0	3487	3543		-1		0				NaN	518520	0;284246.3;388975.8;394276.7;316918.7;197295.7;141855.4;0	0
20140904-PurClathDigest-1ug-01	MULTI	3	348.86166	1043.5632	NaN	5	3	2	NaN	0.563156	0.0431164933670516	3.043899	348.861237301249	34.018	7.46	0	3495	3527		-1		0				NaN	212060	0;159351.1;183457.6;40595.2;0	0
20140904-PurClathDigest-1ug-01	MULTI	2	303.65173	605.2889	32140.87109375	9	6	2	NaN	0.288901	-0.0295315055176388	2.49304	303.651240556262	34.082	12.77	0	3495	3551		-1		0				NaN	318970	0;58251.7;43740.53;393572.1;300826.2;226969.9;67600.48;0	0
20140904-PurClathDigest-1ug-01	MULTI	2	305.16577	608.31699	38859.1484375	22	12	2	NaN	0.31699	-0.00283538879352818	0.756634	305.165640126564	34.043	24.05	0	3463	3567		-1		0				NaN	1592400	0;147560.1;283989;881097.3;972210.4;1425400;1564553;1501855;1405438;1339988;783857.9;228902.8;56144.55;0	0
20140904-PurClathDigest-1ug-01	MULTI	3	323.20281	966.5866	38383.3984375	7	4	2	NaN	0.586598	0.101968480061487	1.732948	323.202758459319	34.099	9.035	0	3511	3551		-1		0				NaN	349940	0;265551.8;233647.5;309619.5;111823.2;0	0
20140904-PurClathDigest-1ug-01	MULTI	3	337.50747	1009.5006	37079.59765625	9	5	2	NaN	0.500568	-0.00380184571497466	1.551747	337.507563683848	34.065	11.04	0	3495	3543		-1		0				NaN	441800	0;98863.91;387989.9;379013.4;270285.4;258262.4;0	0
20140904-PurClathDigest-1ug-01	MULTI	3	339.1822	1014.5248	35983.4375	7	4	2	NaN	0.524758	0.0180763322216535	1.406723	339.182194632561	34.088	9.175	0	3503	3543		-1		0				NaN	524130	0;69781.85;151215.7;460287.3;217736.9;0	0
20140904-PurClathDigest-1ug-01	MULTI	3	347.82674	1040.4584	36657.55078125	10	6	2	NaN	0.458401	-0.0602099894108505	1.509053	347.826644105538	34.084	12.635	0	3503	3559		-1		0				NaN	207120	0;217531.3;196477.2;179191.7;127740;132952.3;52263.13;0	0
20140904-PurClathDigest-1ug-01	MULTI	1	316.1967	315.18943	37405.53515625	12	12	2	NaN	0.189426	0.00443918928033327	3.619707	316.197332034148	34.128	23.41	0	3487	3591		-1		0				NaN	264410	0;115868.9;45135.78;91511.25;137886.7;187294.8;259455.9;247690.2;131575.1;124681.6;0;0;0;0	0
20140904-PurClathDigest-1ug-01	MULTI	3	324.86634	971.5772	40650.39453125	4	2	2	NaN	0.577202	0.0902764266833174	2.722005	324.866007868882	34.13	5.31	0	3527	3551		-1		0				NaN	293310	0;259509.3;129328.8;0	0
20140904-PurClathDigest-1ug-01	MULTI	3	343.22219	1026.6447	36358.65234375	13	7	3	NaN	0.644744	0.132487667449141	1.224852	343.222145435081	34.136	14.275	0	3511	3575		-1		0				NaN	1052300	0;126170.8;584174;1019603;837086.7;452939.3;143317.5;116981.7;0	0
20140904-PurClathDigest-1ug-01	MULTI	1	345.1769	344.16962	36906.6796875	9	7	2	NaN	0.169621	-0.0286972148602445	1.327086	345.176917299954	34.209	14.115	0	3527	3591		-1		0				NaN	2603600	0;34364.32;45583.4;688769.6;2537372;218520.4;129231.3;223854;0	0
20140904-PurClathDigest-1ug-01	MULTI	4	304.42785	1213.6823	41495.95703125	8	5	2	NaN	0.682304	0.084010322281074	2.898281	304.42813859523	34.214	10.525	0	3535	3583		-1		0				NaN	493780	0;51477.59;263609.3;341416.2;413818.2;110239.8;0	0
20140904-PurClathDigest-1ug-01	MULTI	3	308.80086	923.38076	37509.4296875	14	6	3	NaN	0.380755	-0.0839996821949853	0.725388	308.800838549745	34.201	12.3	0	3535	3591		-1		0				NaN	1635400	0;648293.3;1600089;1365477;788554.6;330814.1;138024.2;0	0
20140904-PurClathDigest-1ug-01	MULTI	3	321.17486	960.50274	36909.6875	5	3	2	NaN	0.502744	0.0209127224061376	3.110832	321.17507628003	34.209	6.97	0	3543	3575		-1		0				NaN	824150	0;153347;729182;174562.4;0	0
20140904-PurClathDigest-1ug-01	MULTI	3	327.81471	980.42231	NaN	6	4	2	NaN	0.422308	-0.0686865424249845	3.974637	327.813750969286	34.217	8.76	0	3543	3583		-1		0				NaN	529010	0;110865.5;464569.6;214281.7;86139.47;0	0
20140904-PurClathDigest-1ug-01	MULTI	3	332.51264	994.5161	35990.91796875	16	9	2	NaN	0.516095	0.0186177845115481	1.928234	332.512336515009	34.155	17.84	0	3511	3591		-1		0				NaN	894070	0;253885;288093.7;785170.5;684224.1;485216.5;373821.4;179382.6;199066.5;136184.3;0	0
20140904-PurClathDigest-1ug-01	MULTI	4	340.94097	1359.7348	34959.2578125	5	4	2	NaN	0.734792	0.0693139431227792	3.528624	341.191319571858	34.225	8.805	0	3551	3591		-1		0				NaN	727130	0;559328.4;97592.27;121720.9;0;0	0
20140904-PurClathDigest-1ug-01	MULTI	3	342.18957	1023.5469	37528.87890625	12	7	2	NaN	0.546886	0.0360542589468196	1.78249	342.189408198483	34.237	14.05	0	3535	3599		-1		0				NaN	539020	0;174753.2;187570.5;381753.5;374806.7;407696.1;253538.9;89541.13;0	0
20140904-PurClathDigest-1ug-01	MULTI	3	322.5036	964.48898	36592.20703125	10	5	3	NaN	0.488978	0.00531307107155499	1.51027	322.503413623749	34.265	10.555	0	3551	3599		-1		0				NaN	688650	0;52626.8;671720.3;766472.1;381414.4;151416.5;0	0
20140904-PurClathDigest-1ug-01	MULTI	3	327.86089	980.56084	26388.166015625	8	6	2	NaN	0.560842	0.0697836042711515	4.307214	327.86075153405	34.225	12.3	0	3535	3591		-1		0				NaN	1349800	0;89582.93;187155.6;773126.6;178989.4;254895.5;217564;0	0
20140904-PurClathDigest-1ug-01	MULTI	4	302.64519	1206.5516	37757.79296875	12	7	2	NaN	0.551638	-0.0433755564833973	1.065357	302.645275961494	34.209	14.115	0	3527	3591		-1		0				NaN	1336300	0;59222.68;336094.9;841355.8;1119920;726022;398225.9;189130.7;0	0
20140904-PurClathDigest-1ug-01	MULTI	4	306.90217	1223.5796	36821.88671875	22	8	3	NaN	0.579566	-0.0232806269930279	0.795734	306.902114829012	34.203	15.975	0	3519	3591		-1		0				NaN	7029300	0;42596.37;1414871;1436783;3628906;6741085;3215889;907436.5;1049748;0	0
20140904-PurClathDigest-1ug-01	MULTI	2	311.70033	621.3861	37675.1484375	6	4	2	NaN	0.386101	0.0602633133430572	3.167851	311.700465885436	34.288	8.825	0	3559	3599		-1		0				NaN	518900	0;64836.04;103864.2;489375.5;54466.6;0	0
20140904-PurClathDigest-1ug-01	MULTI	3	313.17631	936.50709	35816.3671875	5	3	2	NaN	0.507088	0.0362942892227238	1.231283	313.176246434879	34.292	7.08	0	3567	3599		-1		0				NaN	1310400	0;444519.6;1159404;191804.3;0	0
20140904-PurClathDigest-1ug-01	MULTI	3	315.84178	944.50351	36788.890625	8	5	2	NaN	0.503507	0.0290348935870952	2.396604	315.841819592394	34.223	10.535	0	3543	3591		-1		0				NaN	748430	0;33602;662190.4;208974.9;142274.5;113237.8;0	0
20140904-PurClathDigest-1ug-01	MULTI	3	328.17895	981.51501	36293.828125	19	8	4	NaN	0.515011	0.0235136411118901	1.205697	328.178940535455	34.26	15.875	0	3543	3615		-1		0				NaN	3892800	0;313047.6;1275191;2546596;3874201;1968205;639499.1;200390.1;0;0	0
20140904-PurClathDigest-1ug-01	MULTI	3	326.85033	977.52917	37581.8359375	12	8	2	NaN	0.529167	0.0395034890328816	1.04797	326.850277309118	34.213	15.865	0	3527	3599		-1		0				NaN	21591000	0;116362.6;288860;2453584;1.896143E+07;2390727;840650.1;1189944;78099.91;0	1	3562	0	0
20140904-PurClathDigest-1ug-01	MULTI	2	330.70538	659.3962	37406.31640625	6	4	2	NaN	0.3962	0.0528778016682736	1.921405	330.70537997311	34.31	8.855	0	3567	3607		-1		0				NaN	1097200	0;301302.3;667031.5;759010.4;347367.4;0	0
20140904-PurClathDigest-1ug-01	MULTI	2	337.69551	673.37646	36010.01171875	16	7	3	NaN	0.376461	0.0267083201779315	1.196806	337.69534233567	34.275	14.06	0	3543	3607		-1		0				NaN	2654600	0;87209.03;464443.7;2173890;2626756;2343426;1004902;602707.1;0	0
20140904-PurClathDigest-1ug-01	MULTI	3	342.84541	1025.5144	35737.046875	11	6	2	NaN	0.51441	0.00267362979775498	1.107037	342.845508051319	34.222	12.3	0	3535	3591		-1		0				NaN	1335700	0;272760.3;510155.6;1155558;622331.9;509996.3;282409.8;0	0
20140904-PurClathDigest-1ug-01	MULTI	3	316.48118	946.42171	36733.1953125	11	7	3	NaN	0.421705	-0.0536484986910182	2.246471	316.481112090026	34.332	14.4	0	3567	3631		-1		0				NaN	949280	0;36010.21;524591.6;925931.9;467973.6;220589;140891.1;0;0	0
20140904-PurClathDigest-1ug-01	MULTI	3	325.50771	973.50131	NaN	4	2	2	NaN	0.501308	0.0134972798973649	2.275744	325.507827569138	34.312	5.315	0	3575	3599		-1		0				NaN	247760	0;177803.5;219206.9;0	0
20140904-PurClathDigest-1ug-01	MULTI	3	330.51787	988.53179	36741.40234375	5	3	2	NaN	0.531794	0.0370695628580506	1.826701	330.518071506785	34.297	7.08	0	3567	3599		-1		0				NaN	932110	0;132637.5;818575.1;153218.6;0	0
20140904-PurClathDigest-1ug-01	MULTI	2	334.19804	666.38153	35478.43359375	4	2	2	NaN	0.381527	0.034991771576415	1.238193	334.19788807271	34.31	5.315	0	3575	3599		-1		0				NaN	594730	0;556134.1;520384.3;0	0
20140904-PurClathDigest-1ug-01	MULTI	2	344.16916	686.32377	34229.546875	7	4	2	NaN	0.323772	-0.0319365145447819	1.005583	344.169137909628	34.291	8.825	0	3559	3599		-1		0				NaN	975570	0;84940.54;381106.6;906112.5;296948.9;0	0
20140904-PurClathDigest-1ug-01	MULTI	2	343.67934	685.34413	36909.87890625	5	3	2	NaN	0.344135	-0.0111233940740476	2.636204	343.679207854098	34.322	7.09	0	3575	3607		-1		0				NaN	447080	0;224580.3;415248;149309.6;0	0
20140904-PurClathDigest-1ug-01	MULTI	3	348.52097	1042.5411	35538.42578125	15	6	3	NaN	0.541083	0.0215138257060516	0.846142	348.520948295552	34.301	12.415	0	3559	3615		-1		0				NaN	9123300	0;615172.2;2306872;8840188;3433540;1258798;119786.4;0	0
20140904-PurClathDigest-1ug-01	MULTI	2	325.20516	648.39577	37498.5390625	7	5	2	NaN	0.39577	0.0575078437193497	0.675546	325.205072827231	34.356	10.845	0	3583	3631		-1		0				NaN	1817600	0;1292840;1699679;661183;281814.9;144207.4;0	0
20140904-PurClathDigest-1ug-01	MULTI	3	341.54168	1021.6032	35944.33203125	50	24	3	NaN	0.603221	0.0932831199776274	0.574923	341.541659237372	34.312	46.09	0	3535	3735		-1		0				NaN	6029100	0;451341.7;1772395;3112850;4016402;4843307;5868772;2096192;1319624;617040.4;410637.9;290943.9;411585.2;128298.6;305948.1;446092.3;241085.8;337959.2;147802.9;110826.9;81268.96;180281.4;225021.5;135786.2;155797.3;0	0
20140904-PurClathDigest-1ug-01	MULTI	2	343.20311	684.39166	35711.71875	17	8	3	NaN	0.391661	0.0368410007228022	0.774006	343.203043108378	34.353	16.265	0	3567	3639		-1		0				NaN	4465000	0;137074;1238512;3156754;4411719;1940674;1146069;341664.2;0;0	0
20140904-PurClathDigest-1ug-01	MULTI	2	301.18512	600.35568	NaN	9	7	2	NaN	0.355683	0.0395191481829897	4.371538	301.186639204555	34.348	14.275	0	3559	3623		-1		0				NaN	488490	0;61764.46;40564.77;152431.3;347496.1;451859.3;364349.8;74655.12;0	0
20140904-PurClathDigest-1ug-01	MULTI	2	330.18455	658.35454	37591.7578125	9	7	2	NaN	0.354544	0.0117004882245055	1.287546	330.184489669247	34.35	14.5	0	3575	3639		-1		0				NaN	3481400	0;163353.8;3255495;2315001;997098.4;406155.4;282339.7;0;0	0
20140904-PurClathDigest-1ug-01	MULTI	2	347.69757	693.38058	35323.04296875	9	6	2	NaN	0.380581	0.0216259698395334	1.136818	347.697494282156	34.406	12.88	0	3591	3647		-1		0				NaN	1093000	0;381720.4;892624.9;1015184;426829.3;111077.8;41406.97;0	0
20140904-PurClathDigest-1ug-01	MULTI	2	339.61156	677.20856	NaN	8	5	2	NaN	0.208562	-0.142953721154413	4.343742	339.609984940011	34.418	10.935	0	3591	3639		-1		0				NaN	453330	0;106682.3;251814.6;421050.8;269113.7;96665.34;0	0
20140904-PurClathDigest-1ug-01	MULTI	3	306.81757	917.43087	32630.736328125	8	5	2	NaN	0.430873	-0.0311449469529634	2.150242	306.817644679872	34.511	11.385	0	3615	3663		-1		0				NaN	230320	0;68691.23;146135.5;248170.9;229244.6;44385.71;0	0
20140904-PurClathDigest-1ug-01	MULTI	3	324.52595	970.55601	40657.609375	11	8	2	NaN	0.556013	0.06955766146325	1.432652	324.525901217592	34.514	16.905	0	3607	3679		-1		0				NaN	853820	0;88467.68;168727.1;499915.3;558188.7;330448.5;346112.4;41892.91;37166.84;0	0
20140904-PurClathDigest-1ug-01	MULTI	3	327.48223	979.42486	37117.4140625	12	7	2	NaN	0.424865	-0.0656707478237877	1.008022	327.482256138899	34.5	15.035	0	3607	3671		-1		0				NaN	807320	0;141021.8;647440.3;708980.4;528409.9;382073.5;236721.2;243485.3;0	0
20140904-PurClathDigest-1ug-01	MULTI	2	333.17901	664.34347	36763.203125	13	7	2	NaN	0.343468	-0.00212998472090931	2.038024	333.178726342591	34.467	14.975	0	3599	3663		-1		0				NaN	1028000	0;208086.2;544047.4;961266.1;831670.1;575699.9;197106.2;197325.6;0	0
20140904-PurClathDigest-1ug-01	MULTI	3	335.18918	1002.5457	37426.37890625	25	12	3	NaN	0.545713	0.0445419166561578	0.653209	335.189157038355	34.473	24.07	0	3583	3687		3752	SEITELRR	8	Unmodified	_SEITELRR_	P06394;A6QNZ7;CON__P02535-1;CON__P13645	89.2916412353516	4752700	0;76106.65;264388.6;1079494;2161526;4172996;4626317;2912039;1538846;965995;94882.06;58114.24;133372.8;0	1	3629	0	0
20140904-PurClathDigest-1ug-01	MULTI	2	339.68208	677.34961	35616.40625	12	7	2	NaN	0.349607	-0.00197362692154002	1.504575	339.68188700332	34.534	15.09	0	3615	3679		-1		0				NaN	1400200	0;246223.2;738811.5;1194456;1300508;911231.6;466109.4;104242.6;0	0
20140904-PurClathDigest-1ug-01	MULTI	2	329.20021	656.38586	36327.30859375	27	12	3	NaN	0.385863	0.043925082865826	0.610678	329.200115459912	34.574	24.235	0	3599	3703		-1		0				NaN	7025000	0;319855.3;613195.4;1053180;1557305;1967912;3785194;6951265;5372039;3637432;1908854;406208.1;340584.3;0	1	3651	0	0
20140904-PurClathDigest-1ug-01	MULTI	2	344.71562	687.41668	35903.19921875	18	9	3	NaN	0.416682	0.060470682846244	0.828594	344.715464365472	34.65	18.8	0	3631	3711		-1		0				NaN	2567200	0;124619.7;345404.3;708554.9;1464268;2294011;2536583;2017919;689809.5;158355.8;0	0
20140904-PurClathDigest-1ug-01	MULTI	2	312.19176	622.36896	37950.8125	10	6	2	NaN	0.368963	0.0426736896246211	1.386861	312.191693653757	34.654	13.105	0	3647	3703		-1		0				NaN	782930	0;99100.29;371100.5;483708.1;738393.5;309401.8;178015.1;0	0
20140904-PurClathDigest-1ug-01	MULTI	2	350.17482	698.33509	35502.40234375	18	8	3	NaN	0.335085	-0.0261488518643773	0.612212	350.174740706306	34.666	16.935	0	3639	3711		-1		0				NaN	4939400	0;88319.55;489614.6;2243321;3383991;4880531;4204836;2022899;265347.1;0	1	3676	0	0
20140904-PurClathDigest-1ug-01	MULTI	3	348.84277	1043.5065	36633.4375	4	2	2	NaN	0.506484	-0.0135288757483067	0.606397	348.842722556363	34.689	5.575	0	3671	3695		-1		0				NaN	886930	0;283519.2;767319.9;0	0
20140904-PurClathDigest-1ug-01	MULTI	2	301.16877	600.32299	39167.97265625	13	11	2	NaN	0.322985	0.0068364775200962	1.292941	301.168766151346	34.623	22.46	0	3607	3703		-1		0				NaN	496780	0;74068.16;86937.72;99807.27;48843.19;153912.9;352080.8;378901.2;468514.4;338146.4;406967.4;0;0	0
20140904-PurClathDigest-1ug-01	MULTI	3	344.50773	1030.5014	35259.5703125	5	3	2	NaN	0.501373	-0.0126573092488798	1.324839	344.507890526957	34.704	7.425	0	3671	3703		-1		0				NaN	390220	0;140070.4;337596.4;290075.6;0	0
20140904-PurClathDigest-1ug-01	MULTI	2	300.70739	599.40023	38629.51953125	6	4	2	NaN	0.400232	0.0845079076581214	2.736246	300.707263361982	34.749	9.46	0	3679	3719		-1		0				NaN	861980	0;97759.08;442245.7;812942.8;138775.4;0	0
20140904-PurClathDigest-1ug-01	MULTI	2	306.6894	611.36424	36795.48046875	8	4	2	NaN	0.364242	0.0430140081538184	0.9936	306.689343188016	34.725	9.31	0	3671	3711		-1		0				NaN	860830	0;135916;522260.5;811859;561693;0	0
20140904-PurClathDigest-1ug-01	MULTI	2	330.69924	659.38393	33295.8828125	5	3	2	NaN	0.38393	0.0406136724734552	3.878853	330.699804765213	34.773	7.76	0	3695	3727		-1		0				NaN	677460	0;633496.6;214178.1;102581.4;0	0
20140904-PurClathDigest-1ug-01	MULTI	3	344.86967	1031.5872	38143.84765625	7	5	2	NaN	0.587193	0.0726630781330186	1.806056	344.869857517932	34.773	11.495	0	3687	3735		-1		0				NaN	1052600	0;420964.3;908609.1;910690.4;485149.4;0;0	0
20140904-PurClathDigest-1ug-01	MULTI	4	306.89413	1223.5474	NaN	5	3	2	NaN	0.547405	-0.0554271351609259	1.358672	306.894056004689	34.856	7.845	0	3711	3743		-1		0				NaN	460110	0;246474;334033.8;234494.1;0	0
20140904-PurClathDigest-1ug-01	MULTI	1	307.98655	306.97927	NaN	7	5	2	NaN	0.979272	-0.20193811442806	1.562932	307.986597676482	34.843	11.58	0	3695	3743		-1		0				NaN	608660	0;133039.8;218844.5;316510.6;597261.4;0;0	0
20140904-PurClathDigest-1ug-01	MULTI	4	307.85865	1227.4055	NaN	5	3	2	NaN	0.405489	-0.199117416745139	3.387472	307.858836546767	34.851	7.845	0	3711	3743		-1		0				NaN	734150	0;464918.1;606049.9;212303.4;0	0
20140904-PurClathDigest-1ug-01	MULTI	4	309.11311	1232.4234	NaN	8	5	2	NaN	0.423351	-0.18356388600796	2.651864	309.11269865708	34.834	11.58	0	3695	3743		-1		0				NaN	739220	0;272484.4;253838.8;565291.6;645283.3;363760.1;0	0
20140904-PurClathDigest-1ug-01	MULTI	2	309.17891	616.34327	38820.84765625	24	10	3	NaN	0.343268	0.0197502344839222	0.588704	309.17883017185	34.79	21.035	0	3671	3759		-1		0				NaN	23373000	0;62771.09;1056786;8164853;2.317184E+07;1.747264E+07;9970247;6203573;3056870;919097.6;453725.6;0	1	3698	0	0
[truncated: 128,560 more rows]
