# Supplementary material for: The ∼16 kDa C-Terminal Sequence of Clathrin Assembly Protein AP180 Is Essential for Efficient Clathrin Binding
Source: PLoS One. 2014 Oct 20;9(10):e110557. doi: 10.1371/journal.pone.0110557 (PMC4203807; doi:10.1371/journal.pone.0110557)
Supplement: Data S2 — Contains the tabulated output of the MaxQuant software from processing the LC-MS/MS data of the tryptic digestion of purified clathrin. (ZIP) [file pone.0110557.s003.zip › txt/Deamidation (NQ)Sites.txt]

Proteins	Positions within proteins	Leading proteins	Protein	Fasta headers	Localization prob	Score diff	PEP	Score	Delta score	Score for localization	Localization prob 1	Score diff 1	PEP 1	Score 1	Localization prob 2	Score diff 2	PEP 2	Score 2	Localization prob 3	Score diff 3	PEP 3	Score 3	Diagnostic peak	Number of Deamidation (NQ)	Amino acid	Sequence window	Modification window	Peptide window coverage	Deamidation (NQ) Probabilities	Deamidation (NQ) Score diffs	Position in peptide	Charge	Mass error [ppm]	Intensity	Intensity___1	Intensity___2	Intensity___3	Ratio mod/base	Intensity 1	Ratio mod/base 1	Intensity 2	Ratio mod/base 2	Intensity 3	Ratio mod/base 3	Intensity 1___1	Intensity 1___2	Intensity 1___3	Intensity 2___1	Intensity 2___2
CON__P13645	187	CON__P13645	CON__P13645	>P13645 SWISS-PROT:P13645 Tax_Id=9606 Gene_Symbol=KRT10 Keratin, type I cytoskeletal 10	0.999999	59.5041	0.00198353	130.41	123.13	130.41	0.999999	59.5041	0.00198353	130.41	0.986893	18.7676	0.0392092	55.353	0.814057	6.41276	0.0451252	51.276		1	N	YELEGKIKEWYEKHGNSHQGEPRDYSKYYKT	X;X;X;X;X;X;X;X;X;X;X;X;X;X;X;Deamidation (NQ);X;X;X;X;X;X;X;X;X;X;X;X;X;X;X	XXXXXXXXXXXXXPPPPPPPPPPXXXXXXXX	HGN(1)SHQGEPR	HGN(59.5)SHQ(-59.5)GEPR	3	2	-1.6734	213630	213630	0	0	0.26979	130950	0.31699	48277	0.27014	34401	0.17199	130950	0	0	48277	0
CON__P13645;P06394;A6QNZ7;CON__P02535-1;CON__P08730-1;Q17QL7;CON__ENSEMBL:ENSP00000377550;CON__P13646-1;CON__Q7Z3Y8;CON__Q2M2I5	253;234;234;251;201;208;209;209;192;249	CON__P13645	CON__P13645	>P13645 SWISS-PROT:P13645 Tax_Id=9606 Gene_Symbol=KRT10 Keratin, type I cytoskeletal 10;>sp|P06394|K1C10_BOVIN Keratin, type I cytoskeletal 10 OS=Bos taurus GN=KRT10 PE=3 SV=1;>tr|A6QNZ7|A6QNZ7_BOVIN Keratin 10 (Epidermolytic hyperkeratosis; keratosis palm	1	278.597	8.16027E-21	303.79	246.5	295.37	1	287.017	8.16027E-21	303.79	1	233.767	1.46212E-13	246.56	1	278.597	1.80201E-19	295.37		1	N	YENEVALRQSVEADINGLRRVLDELTLTKAD	X;X;X;X;X;X;X;X;X;X;X;X;X;X;X;Deamidation (NQ);X;X;X;X;X;X;X;X;X;X;X;X;X;X;X	XXXXXXXXPPPPPPPPPPPPXXXXXXXXXXX	QSVEADIN(1)GLRR	Q(-278.6)SVEADIN(278.6)GLRR	8	2	-0.032968	31780000	31780000	0	0	0.88012	13408000	0.86926	6661000	0.60012	4067600	0.42437	13408000	0	0	6661000	0
CON__P35527	258	CON__P35527	CON__P35527	>P35527 SWISS-PROT:P35527 Tax_Id=9606 Gene_Symbol=KRT9 Keratin, type I cytoskeletal 9	1	92.1936	0.000759224	148.19	104.24	123.62	1	121.03	0.000759224	148.19	1	104.92	0.0058662	129.88	1	92.1936	0.0159171	123.62		1	N	FEMEQNLRQGVDADINGLRQVLDNLTMEKSD	X;X;Oxidation (M);X;X;X;X;X;X;X;X;X;X;X;X;Deamidation (NQ);X;X;X;X;X;X;X;X;X;X;Oxidation (M);X;X;X;X	XXXXXXXXPPPPPPPPPPPXXXXXXXXXXXX	QGVDADIN(1)GLR	Q(-92.19)GVDADIN(92.19)GLR	8	2	0.13184	24606000	24606000	0	0	NaN	14612000	NaN	5506000	NaN	4488000	NaN	14612000	0	0	5506000	0
E1BFB0	1356	E1BFB0	E1BFB0	>tr|E1BFB0|E1BFB0_BOVIN Uncharacterized protein OS=Bos taurus GN=SPTAN1 PE=4 SV=2	1	143.034	9.38569E-05	143.03	90.455	143.03					1	143.034	9.38569E-05	143.03						1	N	LQRFLSDFRDLMSWINGIRGLVSSDELAKDV	X;X;X;X;X;X;X;X;X;X;X;Oxidation (M);X;X;X;Deamidation (NQ);X;X;X;X;X;X;X;X;X;X;X;X;X;X;X	XXXXXXXXXPPPPPPPPPPXXXXXXXXXXXX	DLMSWIN(1)GIR	DLMSWIN(143.03)GIR	7	2	-0.11401	1945200	1945200	0	0	NaN	0	NaN	1945200	NaN	0	NaN	0	0	0	1945200	0
F1MDZ2;O77788	842;842	F1MDZ2	F1MDZ2	>tr|F1MDZ2|F1MDZ2_BOVIN Neurofilament medium polypeptide OS=Bos taurus GN=NEFM PE=4 SV=2;>sp|O77788|NFM_BOVIN Neurofilament medium polypeptide OS=Bos taurus GN=NEFM PE=1 SV=3	1	103.791	0.000266169	114.9	110.8	103.79	1	103.791	0.00727499	103.79					1	114.897	0.000266169	114.9		1	N	KEKGSGGEEEKGVVTNGLDVSPGDEKKGGDK	X;X;X;X;X;X;X;X;X;X;X;X;X;X;X;Deamidation (NQ);X;X;X;X;X;X;X;X;X;X;X;X;X;X;X	XPPPPPPPPPPPPPPPPPPPPPPPPPXXXXX	GVVTN(1)GLDVSPGDEK	GVVTN(103.79)GLDVSPGDEK	5	2	0.40189	7715000	7715000	0	0	NaN	0	NaN	0	NaN	2965900	NaN	0	0	0	0	0
F1MDZ2;O77788	814;814	F1MDZ2	F1MDZ2	>tr|F1MDZ2|F1MDZ2_BOVIN Neurofilament medium polypeptide OS=Bos taurus GN=NEFM PE=4 SV=2;>sp|O77788|NFM_BOVIN Neurofilament medium polypeptide OS=Bos taurus GN=NEFM PE=1 SV=3	1	164.365	3.61907E-28	298.96	282.56	252.91	1	120.634	2.56766E-11	201.95	1	166.019	2.25762E-20	250.45	1	164.365	3.61907E-28	298.96		1	N	EEGGLKESRKEDIAINGEVEGKEEEQETKEK	X;X;X;X;X;X;X;X;X;X;X;X;X;X;X;Deamidation (NQ);X;X;X;X;X;X;X;X;X;X;X;X;X;X;X	XXXXXXXXXPPPPPPPPPPPPPPPPPPPPXX	KEDIAIN(1)GEVEGKEEEQETK	KEDIAIN(164.36)GEVEGKEEEQ(-164.36)ETK	7	2	0.65094	527180000	527180000	0	0	110.94	57387000	12.076	21941000	NaN	8415700	NaN	57387000	0	0	21941000	0
F1MDZ2	109	F1MDZ2	F1MDZ2	>tr|F1MDZ2|F1MDZ2_BOVIN Neurofilament medium polypeptide OS=Bos taurus GN=NEFM PE=4 SV=2	0.999973	45.71	6.03714E-44	266.75	221.47	233.31	0.999973	45.71	6.0143E-10	233.31	0.999806	37.1157	6.03714E-44	266.75	0.897127	9.48288	0.0239897	90.229		1	N	YKLSRSNEKEQLQGLNDRFAGYIEKVHYLEQ	X;X;X;X;X;X;X;X;X;X;X;X;X;X;X;Deamidation (NQ);X;X;X;X;X;X;X;X;X;X;X;X;X;X;X	XXXXXPPPPPPPPPPPPPXXXXXXXXXXXXX	SNEKEQLQGLN(1)DR	SN(-129.14)EKEQ(-89.37)LQ(-45.71)GLN(45.71)DR	11	2	1.001	13889000	13889000	0	0	0.031933	12178000	0.056076	0	0	1710700	0.015131	12178000	0	0	0	0
F1MDZ2;O77788	284;284	F1MDZ2	F1MDZ2	>tr|F1MDZ2|F1MDZ2_BOVIN Neurofilament medium polypeptide OS=Bos taurus GN=NEFM PE=4 SV=2;>sp|O77788|NFM_BOVIN Neurofilament medium polypeptide OS=Bos taurus GN=NEFM PE=1 SV=3	0.972993	15.5768	1.16763E-08	125.23	125.05	125.23	0.816512	6.53669	4.78096E-05	101.17	0.972993	15.5768	3.82634E-06	125.23	0.820475	6.61125	1.16763E-08	107.78		1	N	ALKEIRSQLESHSDQNMHQAEEWFKCRYAKL	X;X;X;X;X;X;X;X;X;X;X;X;X;X;X;Deamidation (NQ);Oxidation (M);X;X;X;X;X;X;X;X;X;X;X;X;X;X	XXXXXXPPPPPPPPPPPPPPPPPPPXXXXXX	SQLESHSDQ(0.027)N(0.973)MHQAEEWFK	SQ(-61.92)LESHSDQ(-15.58)N(15.58)MHQ(-41.8)AEEWFK	10	3	0.060728	51474000	51474000	0	0	0.11911	0	0	21298000	0.18836	19336000	0.20196	0	0	0	21298000	0
F1MEW3	46	F1MEW3	F1MEW3	>tr|F1MEW3|F1MEW3_BOVIN Microtubule-associated protein OS=Bos taurus GN=MAP2 PE=3 SV=1	1	70.6778	0.00676414	101.73	99.106	101.73	0.999934	42.0631	0.0623724	60.419	0.999993	51.8142	0.0118417	82.6	1	70.6778	0.00676414	101.73		1	N	IKDQGGAGEGLVRSANGFPYREDEEGAFGEH	X;X;X;X;X;X;X;X;X;X;X;X;X;X;X;Deamidation (NQ);X;X;X;X;X;X;X;X;X;X;X;X;X;X;X	XXXXXXXXXXXXXPPPPPPPPPPPPPPPPPP	SAN(1)GFPYREDEEGAFGEHGSQGTYSNTK	SAN(70.68)GFPYREDEEGAFGEHGSQ(-70.68)GTYSN(-89.71)TK	3	3	-0.54905	27367000	27367000	0	0	NaN	12300000	NaN	7193900	NaN	7872700	NaN	12300000	0	0	7193900	0
F1N3M8;G3MYP5	241;56	F1N3M8;G3MYP5	G3MYP5	>tr|F1N3M8|F1N3M8_BOVIN Uncharacterized protein (Fragment) OS=Bos taurus GN=MAP1A PE=4 SV=2;>tr|G3MYP5|G3MYP5_BOVIN Uncharacterized protein OS=Bos taurus GN=MAP1A PE=4 SV=1	0.991974	20.9199	3.77299E-05	136.49	132.95	136.49					0.955028	13.2707	7.30701E-05	109.65	0.991974	20.9199	3.77299E-05	136.49		1	N	YIFPGGRGDSALFAVNGFNILVDGGSDRKSC	X;X;X;X;X;X;X;X;X;X;X;X;X;X;X;Deamidation (NQ);X;X;X;X;X;X;X;X;X;X;X;X;X;X;X	XXXXXXXPPPPPPPPPPPPPPPPPPPPPXXX	GDSALFAVN(0.992)GFN(0.008)ILVDGGSDR	GDSALFAVN(20.92)GFN(-20.92)ILVDGGSDR	9	2	-0.66036	15981000	15981000	0	0	2.1626	0	0	8913200	NaN	7068000	3.162	0	0	0	8913200	0
F1N3M8;G3MYP5	284;99	F1N3M8;G3MYP5	G3MYP5	>tr|F1N3M8|F1N3M8_BOVIN Uncharacterized protein (Fragment) OS=Bos taurus GN=MAP1A PE=4 SV=2;>tr|G3MYP5|G3MYP5_BOVIN Uncharacterized protein OS=Bos taurus GN=MAP1A PE=4 SV=1	0.973358	15.6663	8.59215E-05	128.98	128.34	128.98	0.830747	6.92287	0.00345158	106.88	0.963394	14.31	0.000108457	120.42	0.973358	15.6663	8.59215E-05	128.98		1	N	SVLLTHIGADNLPGINGLLQRKVAELEEEQS	X;X;X;X;X;X;X;X;X;X;X;X;X;X;X;Deamidation (NQ);X;X;X;X;X;X;X;X;X;X;X;X;X;X;X	PPPPPPPPPPPPPPPPPPPPPXXXXXXXXXX	HLDRIDSVLLTHIGADNLPGIN(0.973)GLLQ(0.026)R	HLDRIDSVLLTHIGADN(-36.09)LPGIN(15.67)GLLQ(-15.67)R	22	3	2.1051	32878000	32878000	0	0	4.6779	11802000	1.6792	8381500	NaN	7848700	NaN	11802000	0	0	8381500	0
P04975;G3N252	139;139	P04975	P04975	>sp|P04975|CLCB_BOVIN Clathrin light chain B OS=Bos taurus GN=CLTB PE=1 SV=1;>tr|G3N252|G3N252_BOVIN Clathrin light chain B OS=Bos taurus GN=CLTB PE=4 SV=1	0.994778	22.7992	0.0302865	119.29	95.261	119.29									0.994778	22.7992	0.0302865	119.29		1	N	EQEWREKAKKDLEEWNQRQSEQVEKNKINNR	X;X;X;X;X;X;X;X;X;X;X;X;X;X;X;Deamidation (NQ);X;X;X;X;X;X;X;X;X;X;X;X;X;X;X	XXXXXXXXXXPPPPPPPPXXXXXXXXXXXXX	DLEEWN(0.995)Q(0.005)R	DLEEWN(22.8)Q(-22.8)R	6	2	-1.353	1417700	1417700	0	0	0.0014889	0	0	0	0	1417700	0.0058231	0	0	0	0	0
P00760	84	P00760	P00760	>sp|P00760|TRY1_BOVIN Cationic trypsin OS=Bos taurus PE=1 SV=3	0.993194	21.6423	0.000117839	115.42	112.99	115.42					0.993194	21.6423	0.000117839	115.42						1	N	IQVRLGEDNINVVEGNEQFISASKSIVHPSY	X;X;X;X;X;X;X;X;X;X;X;X;X;X;X;Deamidation (NQ);X;X;X;X;X;X;X;X;X;X;X;X;X;X;X	XXXXPPPPPPPPPPPPPPPPPPPPXXXXXXX	LGEDNINVVEGN(0.993)EQ(0.007)FISASK	LGEDN(-88.29)IN(-58.7)VVEGN(21.64)EQ(-21.64)FISASK	12	2	1.248	22355000	22355000	0	0	0.0072764	0	0	22355000	0.029005	0	0	0	0	0	22355000	0
P00760	120	P00760	P00760	>sp|P00760|TRY1_BOVIN Cationic trypsin OS=Bos taurus PE=1 SV=3	1	147.289	1.2696E-05	196.95	110.08	147.29	1	136.268	1.2696E-05	196.95	1	163.203	0.00528633	163.2	1	147.289	0.0047621	158.07		1	N	NNDIMLIKLKSAASLNSRVASISLPTSCASA	Deamidation (NQ);Deamidation (NQ);X;X;Oxidation (M);X;X;X;X;X;X;X;X;X;X;Deamidation (NQ);X;X;X;X;X;X;X;X;X;X;X;X;X;X;X	XXXXXXXXXXPPPPPPPPXXXXXXXXXXXXX	SAASLN(1)SR	SAASLN(147.29)SR	6	2	0.17232	36241000	36241000	0	0	0.1817	17425000	0.12793	8678100	0.13721	10138000	NaN	17425000	0	0	8678100	0
P00760	100	P00760	P00760	>sp|P00760|TRY1_BOVIN Cationic trypsin OS=Bos taurus PE=1 SV=3	0.99467	22.7095	4.31037E-08	148.38	146.97	124.63	0.95563	13.3325	7.99262E-05	110.6	0.986861	18.7734	9.08362E-05	113.49	0.99467	22.7095	4.31037E-08	148.38		1	N	EQFISASKSIVHPSYNSNTLNNDIMLIKLKS	X;X;X;X;X;X;X;X;X;X;X;X;X;X;X;Deamidation (NQ);X;X;X;X;X;X;X;X;X;X;X;X;X;X;X	XXXXXXXXPPPPPPPPPPPPPPPPPPPPXXX	SIVHPSYN(0.995)SN(0.005)TLNNDIMLIK	SIVHPSYN(22.71)SN(-22.71)TLN(-78.72)N(-84.2)DIMLIK	8	3	1.1746	72021000	72021000	0	0	0.069757	23714000	0.050195	10572000	0.036714	8245400	0.030308	23714000	0	0	10572000	0
P00760	105	P00760	P00760	>sp|P00760|TRY1_BOVIN Cationic trypsin OS=Bos taurus PE=1 SV=3	0.946816	12.6571	1.11959E-07	146.97	145.57	146.97									0.946816	12.6571	1.11959E-07	146.97		1	N	ASKSIVHPSYNSNTLNNDIMLIKLKSAASLN	X;X;X;X;X;X;X;X;X;X;X;X;X;X;X;Deamidation (NQ);X;X;X;X;X;X;X;X;X;X;X;X;X;X;Deamidation (NQ)	XXXPPPPPPPPPPPPPPPPPPPPXXXXXXXX	SIVHPSYNSN(0.002)TLN(0.947)N(0.051)DIMLIK	SIVHPSYN(-40.11)SN(-27.36)TLN(12.66)N(-12.66)DIMLIK	13	2	0.61083	2957300	2957300	0	0	0.0028643	0	0	0	0	2957300	0.01087	0	0	0	0	0
P00760	106	P00760	P00760	>sp|P00760|TRY1_BOVIN Cationic trypsin OS=Bos taurus PE=1 SV=3	0.964813	14.3806	3.47998E-12	175.85	172.7	175.85	0.964813	14.3806	3.47998E-12	175.85	0.832289	6.96529	1.92855E-07	143.93	0.823651	6.69379	3.91563E-05	105.79		1	N	SKSIVHPSYNSNTLNNDIMLIKLKSAASLNS	X;X;X;X;X;X;X;X;X;X;X;X;X;X;X;Deamidation (NQ);X;X;X;X;X;X;X;X;X;X;X;X;X;Deamidation (NQ);X	XXPPPPPPPPPPPPPPPPPPPPXXXXXXXXX	SIVHPSYNSNTLN(0.035)N(0.965)DIMLIK	SIVHPSYN(-93.24)SN(-73.78)TLN(-14.38)N(14.38)DIMLIK	14	2	0.66452	121440000	121440000	0	0	0.11763	41610000	0.088074	26877000	0.093335	20393000	0.074957	41610000	0	0	26877000	0
P02548	98	P02548	P02548	>sp|P02548|NFL_BOVIN Neurofilament light polypeptide OS=Bos taurus GN=NEFL PE=1 SV=3	0.999753	36.0678	0.00248532	159.28	110.85	159.28	0.999753	36.0678	0.00248532	159.28	0.999637	34.4039	0.00254079	148.14						1	N	LKSIRTQEKAQLQDLNDRFASFIERVHELEQ	X;X;X;X;X;X;X;X;X;X;X;X;X;X;X;Deamidation (NQ);X;X;X;X;X;X;X;X;X;X;X;X;X;X;X	XXXXXXXXXPPPPPPPPPXXXXXXXXXXXXX	AQLQDLN(1)DR	AQ(-96.2)LQ(-36.07)DLN(36.07)DR	7	2	-1.2648	20211000	20211000	0	0	0.3677	13624000	NaN	6586800	NaN	0	0	13624000	0	0	6586800	0
P02548	155	P02548	P02548	>sp|P02548|NFL_BOVIN Neurofilament light polypeptide OS=Bos taurus GN=NEFL PE=1 SV=3	1	110.382	0.0464923	110.38	82.9	110.38	1	110.382	0.0464923	110.38										1	N	EQEIRDLRLAAEDATNEKQALQGEREGLEET	X;X;X;X;X;X;X;X;X;X;X;X;X;X;X;Deamidation (NQ);X;X;X;X;X;X;X;X;X;X;X;X;X;X;X	XXXXXXXXPPPPPPPPPPXXXXXXXXXXXXX	LAAEDATN(1)EK	LAAEDATN(110.38)EK	8	2	0.087548	2374900	2374900	0	0	0.0067412	2374900	0.012041	0	0	0	0	2374900	0	0	0	0
P02548	273	P02548	P02548	>sp|P02548|NFL_BOVIN Neurofilament light polypeptide OS=Bos taurus GN=NEFL PE=1 SV=3	0.385325	0.982122	0.0495989	48.284	46.845	48.284									0.385325	0.982122	0.0495989	48.284			N	ALKDIRAQYEKLAAKNMQNAEEWFKSRFTVL	X;X;X;X;X;X;X;X;X;X;X;X;X;X;X;Deamidation (NQ);Oxidation (M);X;X;X;X;X;X;X;X;X;X;X;X;X;X	XXXXXXXXXXXXXXXPPPPPPPPPPXXXXXX	N(0.385)MQ(0.307)N(0.307)AEEWFK	N(0.98)MQ(-0.98)N(-0.98)AEEWFK	1	2	0.71884	0	0	0	0	0	0	0	0	NaN	0	0	0	0	0	0	0
P04973	122	P04973	P04973	>sp|P04973|CLCA_BOVIN Clathrin light chain A OS=Bos taurus GN=CLTA PE=1 SV=1	1	166.614	0.00154053	166.61	123.75	166.61	1	165.152	0.00154053	166.09	1	154.355	0.00251989	154.35	1	166.614	0.00231742	166.61		1	N	KWREEQTERLEALDANSRKQEAEWKEKAIKE	X;X;X;X;X;X;X;X;X;X;X;X;X;X;X;Deamidation (NQ);X;X;X;X;X;X;X;X;X;X;X;X;X;X;X	XXXXXXXXXPPPPPPPPPXXXXXXXXXXXXX	LEALDAN(1)SR	LEALDAN(166.61)SR	7	2	-0.48049	206970000	206970000	0	0	0.20507	110670000	0.19502	57739000	0.24933	38569000	0.18343	110670000	0	0	57739000	0
P49951;F1MPU0	1145;1131	P49951	P49951	>sp|P49951|CLH1_BOVIN Clathrin heavy chain 1 OS=Bos taurus GN=CLTC PE=1 SV=1;>tr|F1MPU0|F1MPU0_BOVIN Clathrin heavy chain 1 (Fragment) OS=Bos taurus GN=CLTC PE=4 SV=2	0.91859	11.9223	0.0276338	62.193	61.665	62.193					0.91859	11.9223	0.0276338	62.193						1	N	KADDPSSYMEVVQAANTSGNWEELVKYLQMA	X;X;X;X;X;X;X;X;Oxidation (M);X;X;X;X;X;X;Deamidation (NQ);X;X;X;X;X;X;X;X;X;X;X;X;X;Oxidation (M);X	XPPPPPPPPPPPPPPPPPPPPPPPPPXXXXX	ADDPSSYMEVVQ(0.059)AAN(0.919)TSGN(0.022)WEELVK	ADDPSSYMEVVQ(-11.92)AAN(11.92)TSGN(-16.13)WEELVK	15	2	0.6981	42098000	42098000	0	0	0.3774	0	0	42098000	1.2388	0	NaN	0	0	0	42098000	0
P49951;F1MPU0	1002;988	P49951	P49951	>sp|P49951|CLH1_BOVIN Clathrin heavy chain 1 OS=Bos taurus GN=CLTC PE=1 SV=1;>tr|F1MPU0|F1MPU0_BOVIN Clathrin heavy chain 1 (Fragment) OS=Bos taurus GN=CLTC PE=4 SV=2	1	72.4328	0.00265802	86.005	83.226	72.433	1	86.0048	0.00265802	86.005	1	72.5834	0.0089406	72.583	1	72.4328	0.00825968	72.433		1	N	EVSVTVKAFMTADLPNELIELLEKIVLDNSV	X;X;X;X;X;X;X;X;X;Oxidation (M);X;X;X;X;X;Deamidation (NQ);X;X;X;X;X;X;X;X;X;X;X;X;Deamidation (NQ);X;X	XXXXXXXPPPPPPPPPPPPPPPPPXXXXXXX	AFMTADLPN(1)ELIELLEK	AFMTADLPN(72.43)ELIELLEK	9	2	-0.2548	49797000	49797000	0	0	0.29683	27923000	0.16645	15014000	NaN	6859800	NaN	27923000	0	0	15014000	0
P49951;F1MPU0	1437;1423	P49951	P49951	>sp|P49951|CLH1_BOVIN Clathrin heavy chain 1 OS=Bos taurus GN=CLTC PE=1 SV=1;>tr|F1MPU0|F1MPU0_BOVIN Clathrin heavy chain 1 (Fragment) OS=Bos taurus GN=CLTC PE=4 SV=2	1	104.209	0.00563059	104.21	41.495	104.21	1	101.643	0.00635502	101.64					1	104.209	0.00563059	104.21		1	N	LLMVLSPRLDHTRAVNYFSKVKQLPLVKPYL	X;X;Oxidation (M);X;X;X;X;X;X;X;X;X;X;X;X;Deamidation (NQ);X;X;X;X;X;X;X;X;X;X;X;X;X;X;X	XXXXXXXXXXXXXPPPPPPPXXXXXXXXXXX	AVN(1)YFSK	AVN(104.21)YFSK	3	2	0.42066	0	0	0	0	0	0	0	0	0	0	0	0	0	0	0	0
P49951;F1MPU0	319;306	P49951	P49951	>sp|P49951|CLH1_BOVIN Clathrin heavy chain 1 OS=Bos taurus GN=CLTC PE=1 SV=1;>tr|F1MPU0|F1MPU0_BOVIN Clathrin heavy chain 1 (Fragment) OS=Bos taurus GN=CLTC PE=4 SV=2	1	107.557	0.000710022	115.54	114.78	107.56	1	115.536	0.000710022	115.54	1	100.76	0.0020065	100.76	1	107.557	0.00080253	107.56		1	N	FVTAPHEATAGIIGVNRKGQVLSVCVEEENI	X;X;X;X;X;X;X;X;X;X;X;X;X;X;X;Deamidation (NQ);X;X;X;X;X;X;X;X;X;X;X;X;X;X;X	PPPPPPPPPPPPPPPPPPXXXXXXXXXXXXX	ISGETIFVTAPHEATAGIIGVN(1)RK	ISGETIFVTAPHEATAGIIGVN(107.56)RK	22	3	1.438	106490000	106490000	0	0	0.033989	54322000	0.031525	30021000	0.037102	22143000	0.036863	54322000	0	0	30021000	0
P49951;F1MPU0	1015;1001	P49951	P49951	>sp|P49951|CLH1_BOVIN Clathrin heavy chain 1 OS=Bos taurus GN=CLTC PE=1 SV=1;>tr|F1MPU0|F1MPU0_BOVIN Clathrin heavy chain 1 (Fragment) OS=Bos taurus GN=CLTC PE=4 SV=2	1	210.352	1.40868E-12	257.42	175	210.35	1	243.132	4.41118E-12	243.13	1	196.114	1.40868E-12	257.42	1	210.352	3.75556E-08	210.35		1	N	LPNELIELLEKIVLDNSVFSEHRNLQNLLIL	X;X;Deamidation (NQ);X;X;X;X;X;X;X;X;X;X;X;X;Deamidation (NQ);X;X;X;X;X;X;X;X;X;Deamidation (NQ);Deamidation (NQ);X;X;X;X	XXXXXXXXXXXPPPPPPPPPPPPXXXXXXXX	IVLDN(1)SVFSEHR	IVLDN(210.35)SVFSEHR	5	2	0.38541	584740000	584740000	0	0	0.11978	85526000	0.036206	147480000	0.09586	100400000	0.10235	85526000	0	0	147480000	0
P49951;F1MPU0	887;874	P49951	P49951	>sp|P49951|CLH1_BOVIN Clathrin heavy chain 1 OS=Bos taurus GN=CLTC PE=1 SV=1;>tr|F1MPU0|F1MPU0_BOVIN Clathrin heavy chain 1 (Fragment) OS=Bos taurus GN=CLTC PE=4 SV=2	0.99254	21.2761	1.10418E-05	192.38	166.65	180.07	0.99254	21.2761	1.10418E-05	180.07	0.497691	0	1.71609E-05	160.18	0.487232	0	1.14555E-05	192.38		1	N	EPATHNALAKIYIDSNNNPERFLRENPYYDS	X;X;X;X;X;X;X;X;X;X;X;X;X;X;X;Deamidation (NQ);X;X;X;X;X;X;X;X;X;X;X;X;X;X;X	XXXXXXXXXXPPPPPPPPPPPXXXXXXXXXX	IYIDSN(0.993)N(0.007)NPER	IYIDSN(21.28)N(-21.28)N(-42.09)PER	6	2	0.69045	583880000	583880000	0	0	0.44108	583880000	0.44108	0	NaN	0	NaN	583880000	0	0	0	0
P49951;F1MPU0	888;875	P49951	P49951	>sp|P49951|CLH1_BOVIN Clathrin heavy chain 1 OS=Bos taurus GN=CLTC PE=1 SV=1;>tr|F1MPU0|F1MPU0_BOVIN Clathrin heavy chain 1 (Fragment) OS=Bos taurus GN=CLTC PE=4 SV=2	0.497691	0	1.14555E-05	192.38	166.65	160.18					0.497691	0	1.71609E-05	160.18	0.487232	0	1.14555E-05	192.38			N	PATHNALAKIYIDSNNNPERFLRENPYYDSR	X;X;X;X;X;X;X;X;X;X;X;X;X;X;X;X;X;X;X;X;X;X;X;X;X;X;X;X;X;X;X	XXXXXXXXXXXXXXXXXXXXXXXXXXXXXXX	IYIDSN(0.498)N(0.498)N(0.005)PER	IYIDSN(0)N(0)N(-20.32)PER	7	2	0.48186	0	0	0	0	0	0	0	0	NaN	0	NaN	0	0	0	0	0
P49951;F1MPU0	1078;1064	P49951	P49951	>sp|P49951|CLH1_BOVIN Clathrin heavy chain 1 OS=Bos taurus GN=CLTC PE=1 SV=1;>tr|F1MPU0|F1MPU0_BOVIN Clathrin heavy chain 1 (Fragment) OS=Bos taurus GN=CLTC PE=4 SV=2	1	76.2292	6.62984E-23	243.04	239.6	183.09	1	121.905	6.62984E-23	243.04	1	76.2292	5.35411E-20	224.03	0.999967	44.7701	5.16296E-14	182.12		1	N	ELFEEAFAIFRKFDVNTSAVQVLIEHIGNLD	X;X;X;X;X;X;X;X;X;X;X;X;X;X;X;Deamidation (NQ);X;X;X;X;X;X;X;X;X;X;X;X;X;X;X	XXXXXXXXXXXPPPPPPPPPPPPPPPPPPPP	KFDVN(1)TSAVQVLIEHIGNLDR	KFDVN(76.23)TSAVQ(-76.23)VLIEHIGN(-161.19)LDR	5	3	3.2106	169180000	169180000	0	0	0.035071	65659000	0.030005	61259000	0.043329	34279000	0.028054	65659000	0	0	61259000	0
P49951;F1MPU0	1091;1077	P49951	P49951	>sp|P49951|CLH1_BOVIN Clathrin heavy chain 1 OS=Bos taurus GN=CLTC PE=1 SV=1;>tr|F1MPU0|F1MPU0_BOVIN Clathrin heavy chain 1 (Fragment) OS=Bos taurus GN=CLTC PE=4 SV=2	1	141.623	7.69764E-36	281.96	280.61	273.7	1	151.735	8.65447E-23	240.25	1	162.346	7.69764E-36	281.96	1	141.623	9.85685E-29	273.7		1	N	DVNTSAVQVLIEHIGNLDRAYEFAERCNEPA	X;X;X;X;X;X;X;X;X;X;X;X;X;X;X;Deamidation (NQ);X;X;X;X;X;X;X;X;X;X;X;X;X;X;X	PPPPPPPPPPPPPPPPPPPXXXXXXXXXXXX	KFDVNTSAVQVLIEHIGN(1)LDR	KFDVN(-239.33)TSAVQ(-141.62)VLIEHIGN(141.62)LDR	18	3	1.5204	212440000	212440000	0	0	0.044038	127610000	0.058317	45909000	0.032472	38915000	0.031849	127610000	0	0	45909000	0
P49951;F1MPU0	369;356	P49951	P49951	>sp|P49951|CLH1_BOVIN Clathrin heavy chain 1 OS=Bos taurus GN=CLTC PE=1 SV=1;>tr|F1MPU0|F1MPU0_BOVIN Clathrin heavy chain 1 (Fragment) OS=Bos taurus GN=CLTC PE=4 SV=2	1	76.8232	4.13907E-11	197.49	189.78	173.03	0.999998	56.3844	5.63524E-09	185.02	1	110.398	4.13907E-11	197.49	1	76.8232	1.02854E-08	173.03		1	N	RNNLAGAEELFARKFNALFAQGNYSEAAKVA	X;Deamidation (NQ);Deamidation (NQ);X;X;X;X;X;X;X;X;X;X;X;X;Deamidation (NQ);X;X;X;X;X;X;X;X;X;X;X;X;X;X;X	XXXXXXXXXXXXXPPPPPPPPPPPPPPPPXX	KFN(1)ALFAQGNYSEAAK	KFN(76.82)ALFAQ(-76.82)GN(-98.01)YSEAAK	3	2	1.4091	552610000	552610000	0	0	0.11053	160100000	0.060671	77610000	0.055918	57364000	0.058959	160100000	0	0	77610000	0
P49951;F1MPU0	376;363	P49951	P49951	>sp|P49951|CLH1_BOVIN Clathrin heavy chain 1 OS=Bos taurus GN=CLTC PE=1 SV=1;>tr|F1MPU0|F1MPU0_BOVIN Clathrin heavy chain 1 (Fragment) OS=Bos taurus GN=CLTC PE=4 SV=2	0.813036	6.39392	0.0252211	63.682	57.477	63.682									0.813036	6.39392	0.0252211	63.682		1	N	EELFARKFNALFAQGNYSEAAKVAANAPKGI	X;X;X;X;X;X;X;X;X;X;X;X;X;X;X;Deamidation (NQ);X;X;X;X;X;X;X;X;X;X;X;X;X;X;X	XXXXXXPPPPPPPPPPPPPPPPXXXXXXXXX	KFNALFAQ(0.187)GN(0.813)YSEAAK	KFN(-32.59)ALFAQ(-6.39)GN(6.39)YSEAAK	10	3	0.97447	43489000	43489000	0	0	0.0086983	0	0	0	0	43489000	0.044698	0	0	0	0	0
P49951;F1MPU0	1191;1177	P49951	P49951	>sp|P49951|CLH1_BOVIN Clathrin heavy chain 1 OS=Bos taurus GN=CLTC PE=1 SV=1;>tr|F1MPU0|F1MPU0_BOVIN Clathrin heavy chain 1 (Fragment) OS=Bos taurus GN=CLTC PE=4 SV=2	0.997397	26.8183	9.98583E-09	141.78	139.62	103.31	0.992263	22.0503	0.000544699	98.543	0.995605	24.4047	9.98583E-09	141.78	0.997397	26.8183	1.1823E-05	113.51		1	N	ALAKTNRLAELEEFINGPNNAHIQQVGDRCY	X;X;X;X;X;X;X;X;X;X;X;X;X;X;X;Deamidation (NQ);X;X;X;X;X;X;X;X;X;X;X;X;X;X;X	XXXXXXXPPPPPPPPPPPPPPPPPPPPPPXX	LAELEEFIN(0.997)GPN(0.002)N(0.001)AHIQQVGDR	LAELEEFIN(26.82)GPN(-26.82)N(-32.86)AHIQ(-50.28)Q(-55.81)VGDR	9	3	-0.7636	4189900000	4189900000	0	0	1.16	526430000	0.31737	128800000	0.11544	415460000	0.49599	526430000	0	0	128800000	0
P49951;F1MPU0	1194;1180	P49951	P49951	>sp|P49951|CLH1_BOVIN Clathrin heavy chain 1 OS=Bos taurus GN=CLTC PE=1 SV=1;>tr|F1MPU0|F1MPU0_BOVIN Clathrin heavy chain 1 (Fragment) OS=Bos taurus GN=CLTC PE=4 SV=2	0.864751	8.09296	0.00101998	97.69	96.82	94.632	0.864751	8.09296	0.00101998	94.632					0.789569	6.41399	0.00219775	97.69		1	N	KTNRLAELEEFINGPNNAHIQQVGDRCYDEK	X;X;X;X;X;X;X;X;X;X;X;X;X;X;X;Deamidation (NQ);X;X;X;X;X;X;X;X;X;X;X;X;X;X;X	XXXXPPPPPPPPPPPPPPPPPPPPPPXXXXX	LAELEEFIN(0.001)GPN(0.865)N(0.134)AHIQQVGDR	LAELEEFIN(-29.45)GPN(8.09)N(-8.09)AHIQ(-39.8)Q(-45.44)VGDR	12	3	-0.78456	640700000	640700000	0	0	0.17738	184830000	0.11143	0	0	99632000	0.11894	184830000	0	0	0	0
P49951;F1MPU0	1195;1181	P49951	P49951	>sp|P49951|CLH1_BOVIN Clathrin heavy chain 1 OS=Bos taurus GN=CLTC PE=1 SV=1;>tr|F1MPU0|F1MPU0_BOVIN Clathrin heavy chain 1 (Fragment) OS=Bos taurus GN=CLTC PE=4 SV=2	0.962754	14.1466	0.00301353	88.176	87.07	88.176					0.962754	14.1466	0.00301353	88.176						1	N	TNRLAELEEFINGPNNAHIQQVGDRCYDEKM	X;X;X;X;X;X;X;X;X;X;X;X;X;X;X;Deamidation (NQ);X;X;X;X;X;X;X;X;X;X;X;X;X;X;X	XXXPPPPPPPPPPPPPPPPPPPPPPXXXXXX	LAELEEFINGPN(0.037)N(0.963)AHIQQVGDR	LAELEEFIN(-38.58)GPN(-14.15)N(14.15)AHIQ(-43.54)Q(-48.35)VGDR	13	3	-0.90221	341220000	341220000	0	0	0.094467	0	0	341220000	0.30583	0	0	0	0	0	341220000	0
P49951;F1MPU0	240;227	P49951	P49951	>sp|P49951|CLH1_BOVIN Clathrin heavy chain 1 OS=Bos taurus GN=CLTC PE=1 SV=1;>tr|F1MPU0|F1MPU0_BOVIN Clathrin heavy chain 1 (Fragment) OS=Bos taurus GN=CLTC PE=4 SV=2	0.5	0	0.0112564	55.011	52.298	44.045					0.5	0	0.0259045	48.899	0.5	0	0.0112564	55.011		1	N	GGKLHIIEVGTPPTGNQPFPKKAVDVFFPPE	X;X;X;X;X;X;X;X;X;X;X;X;X;X;X;Deamidation (NQ);X;X;X;X;X;X;X;X;X;X;X;X;X;X;X	XXXPPPPPPPPPPPPPPPPPPXXXXXXXXXX	LHIIEVGTPPTGN(0.5)Q(0.5)PFPK	LHIIEVGTPPTGN(0)Q(0)PFPK	13	3	-3.7021	0	0	0	0	0	0	0	0	0	0	0	0	0	0	0	0
P49951;F1MPU0	1219;1205	P49951	P49951	>sp|P49951|CLH1_BOVIN Clathrin heavy chain 1 OS=Bos taurus GN=CLTC PE=1 SV=1;>tr|F1MPU0|F1MPU0_BOVIN Clathrin heavy chain 1 (Fragment) OS=Bos taurus GN=CLTC PE=4 SV=2	0.999772	36.4161	1.83745E-05	172.27	136.6	172.27	0.999125	30.5747	2.67309E-05	150.1	0.999772	36.4161	1.83745E-05	172.27	0.5	0	2.28433E-05	166.97		1	N	RCYDEKMYDAAKLLYNNVSNFGRLASTLVHL	X;X;X;X;X;X;X;X;X;X;X;X;X;X;X;Deamidation (NQ);X;X;X;X;X;X;X;X;X;X;X;X;X;X;X	XXXXXXXXXXXXPPPPPPPPPPPXXXXXXXX	LLYN(1)NVSNFGR	LLYN(36.42)N(-36.42)VSN(-96.05)FGR	4	2	1.9563	1223700000	1223700000	0	0	5064.7	668620000	2767.3	463200000	NaN	91892000	NaN	668620000	0	0	463200000	0
P49951;F1MPU0	1220;1206	P49951	P49951	>sp|P49951|CLH1_BOVIN Clathrin heavy chain 1 OS=Bos taurus GN=CLTC PE=1 SV=1;>tr|F1MPU0|F1MPU0_BOVIN Clathrin heavy chain 1 (Fragment) OS=Bos taurus GN=CLTC PE=4 SV=2	0.997961	26.8976	2.2504E-06	204.5	153.05	196.27	0.952179	12.991	7.16926E-06	187.97	0.99641	24.4329	2.2504E-06	204.5	0.997961	26.8976	4.69903E-06	196.27		1	N	CYDEKMYDAAKLLYNNVSNFGRLASTLVHLG	X;X;X;X;X;X;X;X;X;X;X;X;X;X;X;Deamidation (NQ);X;X;X;X;X;X;X;X;X;X;X;X;X;X;X	XXXXXXXXXXXPPPPPPPPPPPXXXXXXXXX	LLYN(0.002)N(0.998)VSNFGR	LLYN(-26.9)N(26.9)VSN(-78.57)FGR	5	2	1.6504	429120000	429120000	0	0	1776.1	296830000	1228.5	21140000	NaN	111150000	NaN	296830000	0	0	21140000	0
P49951;F1MPU0	1223;1209	P49951	P49951	>sp|P49951|CLH1_BOVIN Clathrin heavy chain 1 OS=Bos taurus GN=CLTC PE=1 SV=1;>tr|F1MPU0|F1MPU0_BOVIN Clathrin heavy chain 1 (Fragment) OS=Bos taurus GN=CLTC PE=4 SV=2	0.748481	5.28926	0.000346256	97.734	76.674	97.734									0.748481	5.28926	0.000346256	97.734			N	EKMYDAAKLLYNNVSNFGRLASTLVHLGEYQ	X;X;X;X;X;X;X;X;X;X;X;X;X;X;X;Deamidation (NQ);X;X;X;X;X;X;X;X;X;X;X;X;X;X;X	XXXXXXXXPPPPPPPPPPPXXXXXXXXXXXX	LLYN(0.03)N(0.221)VSN(0.748)FGR	LLYN(-13.96)N(-5.29)VSN(5.29)FGR	8	2	2.5673	359520000	359520000	0	0	1488	0	0	0	NaN	359520000	NaN	0	0	0	0	0
P49951;F1MPU0	831;818	P49951	P49951	>sp|P49951|CLH1_BOVIN Clathrin heavy chain 1 OS=Bos taurus GN=CLTC PE=1 SV=1;>tr|F1MPU0|F1MPU0_BOVIN Clathrin heavy chain 1 (Fragment) OS=Bos taurus GN=CLTC PE=4 SV=2	1	124.374	0.0418861	124.89	45.434	124.37	1	124.887	0.0418861	124.89	1	124.374	0.0422208	124.37	1	124.374	0.0422208	124.37		1	N	IGGLLDVDCSEDVIKNLILVVRGQFSTDELV	X;X;X;X;X;X;X;X;X;X;X;X;X;X;X;Deamidation (NQ);X;X;X;X;X;X;X;X;X;X;X;X;X;X;X	XXXXXXXXXXXXXXXPPPPPPPXXXXXXXXX	N(1)LILVVR	N(124.37)LILVVR	1	2	-0.47596	18812000	18812000	0	0	0.019541	11225000	0.02171	4127900	0.016796	3459400	0.017306	11225000	0	0	4127900	0
P49951;F1MPU0	1026;1012	P49951	P49951	>sp|P49951|CLH1_BOVIN Clathrin heavy chain 1 OS=Bos taurus GN=CLTC PE=1 SV=1;>tr|F1MPU0|F1MPU0_BOVIN Clathrin heavy chain 1 (Fragment) OS=Bos taurus GN=CLTC PE=4 SV=2	0.886371	8.92258	0.0081301	109.15	100.75	109.15	0.499959	0	0.0081301	102.87	0.886371	8.92258	0.0231886	109.15						1	N	IVLDNSVFSEHRNLQNLLILTAIKADRTRVM	X;X;X;X;Deamidation (NQ);X;X;X;X;X;X;X;X;X;X;Deamidation (NQ);X;X;X;X;X;X;X;X;X;X;X;X;X;X;Oxidation (M)	XXXXXXXXXXXXPPPPPPPPPPPPXXXXXXX	NLQ(0.114)N(0.886)LLILTAIK	N(-44.1)LQ(-8.92)N(8.92)LLILTAIK	4	2	-0.10188	14315000	14315000	0	0	0.0063856	9504800	0.0077151	4810500	0.0077722	0	0	9504800	0	0	4810500	0
P49951;F1MPU0	355;342	P49951	P49951	>sp|P49951|CLH1_BOVIN Clathrin heavy chain 1 OS=Bos taurus GN=CLTC PE=1 SV=1;>tr|F1MPU0|F1MPU0_BOVIN Clathrin heavy chain 1 (Fragment) OS=Bos taurus GN=CLTC PE=4 SV=2	0.773148	5.32519	0.00016726	153.34	97.565	125.36	0.5	0	0.00924887	122.18	0.5	0	0.00016726	153.34	0.773148	5.32519	0.000347976	149.49		1	N	NVLQNPDLALRMAVRNNLAGAEELFARKFNA	X;X;X;X;X;X;X;X;X;X;X;X;X;X;X;Deamidation (NQ);X;X;X;X;X;X;X;X;X;X;X;X;X;Deamidation (NQ);X	XXXXXXXXXXXXXXXPPPPPPPPPPPPXXXX	N(0.773)N(0.227)LAGAEELFAR	N(5.33)N(-5.33)LAGAEELFAR	1	2	0.33049	365970000	365970000	0	0	0.13225	117290000	0.10091	57145000	0.066519	191540000	0.25678	117290000	0	0	57145000	0
P49951;F1MPU0	356;343	P49951	P49951	>sp|P49951|CLH1_BOVIN Clathrin heavy chain 1 OS=Bos taurus GN=CLTC PE=1 SV=1;>tr|F1MPU0|F1MPU0_BOVIN Clathrin heavy chain 1 (Fragment) OS=Bos taurus GN=CLTC PE=4 SV=2	0.999487	32.8966	3.16537E-08	217.14	140.91	217.14	0.979018	16.6895	4.18129E-05	156.01	0.998963	29.8369	4.93795E-06	183.99	0.999487	32.8966	3.16537E-08	217.14		1	N	VLQNPDLALRMAVRNNLAGAEELFARKFNAL	X;X;X;X;X;X;X;X;X;X;X;X;X;X;X;Deamidation (NQ);X;X;X;X;X;X;X;X;X;X;X;X;Deamidation (NQ);X;X	XXXXXXXXXXXXXXPPPPPPPPPPPPXXXXX	N(0.001)N(0.999)LAGAEELFAR	N(-32.9)N(32.9)LAGAEELFAR	2	2	0.4748	728520000	728520000	0	0	0.26326	434630000	0.37392	232430000	0.27056	61456000	0.082391	434630000	0	0	232430000	0
P49951;F1MPU0	572;559	P49951	P49951	>sp|P49951|CLH1_BOVIN Clathrin heavy chain 1 OS=Bos taurus GN=CLTC PE=1 SV=1;>tr|F1MPU0|F1MPU0_BOVIN Clathrin heavy chain 1 (Fragment) OS=Bos taurus GN=CLTC PE=4 SV=2	0.98676	18.7233	2.73647E-07	203.7	185.63	203.7	0.979968	16.8948	3.96316E-07	194.06	0.98676	18.7233	2.73647E-07	203.7	0.980699	17.0595	2.08186E-05	168.76		1	N	NLIQQCTAFLLDALKNNRPSEGPLQTRLLEM	X;X;X;X;X;X;X;X;X;X;X;X;X;X;X;Deamidation (NQ);X;X;X;X;X;X;X;X;X;X;X;X;X;X;Oxidation (M)	XXXXXXXXXXXXXXXPPPPPPPPPPPPXXXX	N(0.987)N(0.013)RPSEGPLQTR	N(18.72)N(-18.72)RPSEGPLQ(-186.11)TR	1	2	-0.66831	1211900000	1211900000	0	0	0.31374	181930000	0.088151	70589000	0.067258	55600000	0.074189	181930000	0	0	70589000	0
P49951;F1MPU0	573;560	P49951	P49951	>sp|P49951|CLH1_BOVIN Clathrin heavy chain 1 OS=Bos taurus GN=CLTC PE=1 SV=1;>tr|F1MPU0|F1MPU0_BOVIN Clathrin heavy chain 1 (Fragment) OS=Bos taurus GN=CLTC PE=4 SV=2	0.815941	6.46701	3.18914E-05	164.48	123.98	164.48									0.815941	6.46701	3.18914E-05	164.48		1	N	LIQQCTAFLLDALKNNRPSEGPLQTRLLEMN	X;X;X;X;X;X;X;X;X;X;X;X;X;X;X;Deamidation (NQ);X;X;X;X;X;X;X;X;X;X;X;X;X;Oxidation (M);X	XXXXXXXXXXXXXXPPPPPPPPPPPPXXXXX	N(0.184)N(0.816)RPSEGPLQTR	N(-6.47)N(6.47)RPSEGPLQ(-107.3)TR	2	3	-1.1697	2710700	2710700	0	0	0.00070175	0	0	0	0	2710700	0.0036169	0	0	0	0	0
P49951;F1MPU0	1464;1450	P49951	P49951	>sp|P49951|CLH1_BOVIN Clathrin heavy chain 1 OS=Bos taurus GN=CLTC PE=1 SV=1;>tr|F1MPU0|F1MPU0_BOVIN Clathrin heavy chain 1 (Fragment) OS=Bos taurus GN=CLTC PE=4 SV=2	0.546552	1.70646	0.00593589	90.718	89.848	90.718	0.333321	0	0.0572873	44.788	0.546552	1.70646	0.00593589	90.718						1	N	KPYLRSVQNHNNKSVNESLNNLFITEEDYQA	X;X;X;X;X;X;X;X;X;X;X;X;X;X;X;Deamidation (NQ);X;X;X;X;X;X;X;X;X;X;X;X;X;X;X	XXXXXXXXXXXXXPPPPPPPPPPPPPPPPPP	SVN(0.547)ESLN(0.369)N(0.084)LFITEEDYQALR	SVN(1.71)ESLN(-1.71)N(-8.11)LFITEEDYQ(-58.6)ALR	3	2	2.9516	72099000	72099000	0	0	0.018137	0	0	72099000	0.060083	0	0	0	0	0	72099000	0
P49951;F1MPU0	1468;1454	P49951	P49951	>sp|P49951|CLH1_BOVIN Clathrin heavy chain 1 OS=Bos taurus GN=CLTC PE=1 SV=1;>tr|F1MPU0|F1MPU0_BOVIN Clathrin heavy chain 1 (Fragment) OS=Bos taurus GN=CLTC PE=4 SV=2	0.979493	16.7913	1.00126E-12	173.21	170.49	161.51	0.97151	15.3277	1.32786E-08	148.06	0.975451	15.9917	1.00126E-12	173.21	0.979493	16.7913	4.18075E-12	161.51		1	N	RSVQNHNNKSVNESLNNLFITEEDYQALRTS	X;X;X;X;X;X;X;X;X;X;X;X;X;X;X;Deamidation (NQ);X;X;X;X;X;X;X;X;X;X;X;X;X;X;X	XXXXXXXXXPPPPPPPPPPPPPPPPPPPPXX	SVNESLN(0.979)N(0.021)LFITEEDYQALR	SVN(-58.61)ESLN(16.79)N(-16.79)LFITEEDYQ(-119.52)ALR	7	2	2.0638	519040000	519040000	0	0	0.13057	292160000	0.17328	104530000	0.087111	122340000	0.11233	292160000	0	0	104530000	0
P49951;F1MPU0	1469;1455	P49951	P49951	>sp|P49951|CLH1_BOVIN Clathrin heavy chain 1 OS=Bos taurus GN=CLTC PE=1 SV=1;>tr|F1MPU0|F1MPU0_BOVIN Clathrin heavy chain 1 (Fragment) OS=Bos taurus GN=CLTC PE=4 SV=2	0.60768	1.90386	4.7207E-08	135.29	134.11	115.42	0.333321	0	0.0572873	44.788	0.499773	0	4.7207E-08	135.29	0.60768	1.90386	9.136E-05	115.42		1	N	SVQNHNNKSVNESLNNLFITEEDYQALRTSI	X;X;X;X;X;X;X;X;X;X;X;X;X;X;X;Deamidation (NQ);X;X;X;X;X;X;X;X;X;X;X;X;X;X;X	XXXXXXXXPPPPPPPPPPPPPPPPPPPPXXX	SVNESLN(0.392)N(0.608)LFITEEDYQALR	SVN(-32.81)ESLN(-1.9)N(1.9)LFITEEDYQ(-76.54)ALR	8	2	2.2751	50892000	50892000	0	0	0.012802	0	0	0	0	50892000	0.046726	0	0	0	0	0
P49951;F1MPU0	92;79	P49951	P49951	>sp|P49951|CLH1_BOVIN Clathrin heavy chain 1 OS=Bos taurus GN=CLTC PE=1 SV=1;>tr|F1MPU0|F1MPU0_BOVIN Clathrin heavy chain 1 (Fragment) OS=Bos taurus GN=CLTC PE=4 SV=2	0.999944	42.5463	0.0129325	84.882	78.847	84.882	0.999944	42.5463	0.0129325	84.882					0.98825	19.2483	0.0537876	52.247		1	N	SKVIALKAGKTLQIFNIEMKSKMKAHTMTDD	X;X;X;X;X;X;X;X;X;X;X;X;X;X;X;Deamidation (NQ);X;X;Oxidation (M);X;X;X;Oxidation (M);X;X;X;X;Oxidation (M);X;X;X	XXXXXXXXXXPPPPPPPPPPXXXXXXXXXXX	TLQIFN(1)IEMK	TLQ(-42.55)IFN(42.55)IEMK	6	2	-0.99728	12304000	12304000	0	0	0.0053553	8755600	0.0087059	0	0	3548300	0.0053982	8755600	0	0	0	0
P49951;F1MPU0	1489;1475	P49951	P49951	>sp|P49951|CLH1_BOVIN Clathrin heavy chain 1 OS=Bos taurus GN=CLTC PE=1 SV=1;>tr|F1MPU0|F1MPU0_BOVIN Clathrin heavy chain 1 (Fragment) OS=Bos taurus GN=CLTC PE=4 SV=2	0.934605	11.5854	0.0524636	51.495	50.181	51.495									0.934605	11.5854	0.0524636	51.495			N	EEDYQALRTSIDAYDNFDNISLAQRLEKHEL	X;X;X;X;X;X;X;X;X;X;X;X;X;X;X;Deamidation (NQ);X;X;X;X;X;X;X;X;X;X;X;X;X;X;X	XXXXXXXXPPPPPPPPPPPPPPPPPXXXXXX	TSIDAYDN(0.935)FDN(0.065)ISLAQ(0.001)R	TSIDAYDN(11.59)FDN(-11.59)ISLAQ(-32.56)R	8	2	4.0919	51768000	51768000	0	0	0.01163	0	0	0	0	51768000	0.038748	0	0	0	0	0
P49951;F1MPU0	1045;1031	P49951	P49951	>sp|P49951|CLH1_BOVIN Clathrin heavy chain 1 OS=Bos taurus GN=CLTC PE=1 SV=1;>tr|F1MPU0|F1MPU0_BOVIN Clathrin heavy chain 1 (Fragment) OS=Bos taurus GN=CLTC PE=4 SV=2	1	99.1393	0.0112473	99.139	63.506	99.139	1	87.2836	0.0185977	87.284	1	97.6019	0.0120397	97.602	1	99.1393	0.0112473	99.139		1	N	LTAIKADRTRVMEYINRLDNYDAPDIANIAI	X;X;X;X;X;X;X;X;X;X;X;Oxidation (M);X;X;X;Deamidation (NQ);X;X;X;X;X;X;X;X;X;X;X;X;X;X;X	XXXXXXXXXXPPPPPPPXXXXXXXXXXXXXX	VMEYIN(1)R	VMEYIN(99.14)R	6	2	-0.07144	22404000	22404000	0	0	0.015157	12741000	0.016451	4395300	0.012508	5267700	0.014954	12741000	0	0	4395300	0
P49951;F1MPU0	117;104	P49951	P49951	>sp|P49951|CLH1_BOVIN Clathrin heavy chain 1 OS=Bos taurus GN=CLTC PE=1 SV=1;>tr|F1MPU0|F1MPU0_BOVIN Clathrin heavy chain 1 (Fragment) OS=Bos taurus GN=CLTC PE=4 SV=2	0.965176	14.5872	0.0480017	44.6	44.13	44.6					0.499829	0	0.0480017	41.047	0.965176	14.5872	0.0509224	44.6		1	N	HTMTDDVTFWKWISLNTVALVTDNAVYHWSM	X;X;Oxidation (M);X;X;X;X;X;X;X;X;X;X;X;X;Deamidation (NQ);X;X;X;X;X;X;X;X;X;X;X;X;X;X;Oxidation (M)	XXXXXXXXXXXPPPPPPPPPPPPPPPPPPPP	WISLN(0.965)TVALVTDN(0.034)AVYHWSMEGESQ(0.001)PVK	WISLN(14.59)TVALVTDN(-14.59)AVYHWSMEGESQ(-28.85)PVK	5	3	3.7868	5266000	5266000	0	0	0.01489	0	0	0	0	5266000	NaN	0	0	0	0	0
P49951;F1MPU0	125;112	P49951	P49951	>sp|P49951|CLH1_BOVIN Clathrin heavy chain 1 OS=Bos taurus GN=CLTC PE=1 SV=1;>tr|F1MPU0|F1MPU0_BOVIN Clathrin heavy chain 1 (Fragment) OS=Bos taurus GN=CLTC PE=4 SV=2	0.499829	0	0.0480017	41.047	40.556	41.047					0.499829	0	0.0480017	41.047							N	FWKWISLNTVALVTDNAVYHWSMEGESQPVK	X;X;X;X;X;X;X;X;X;X;X;X;X;X;X;X;X;X;X;X;X;X;X;X;X;X;X;X;X;X;X	XXXXXXXXXXXXXXXXXXXXXXXXXXXXXXX	WISLN(0.5)TVALVTDN(0.5)AVYHWSMEGESQPVK	WISLN(0)TVALVTDN(0)AVYHWSMEGESQ(-31.65)PVK	13	3	0.032408	0	0	0	0	0	0	0	0	0	0	NaN	0	0	0	0	0
Q08DH7	295	Q08DH7	Q08DH7	>sp|Q08DH7|AINX_BOVIN Alpha-internexin OS=Bos taurus GN=INA PE=2 SV=1	0.952212	12.9942	0.000371716	182.65	130.07	182.65	0.907497	9.95191	0.00502489	131.45	0.858652	7.83532	0.000617214	170.47	0.952212	12.9942	0.000371716	182.65		1	N	LQSAEEWYKSKFANLNEQAARSTEAIRASRE	X;X;X;X;X;X;X;X;X;X;X;X;X;X;X;Deamidation (NQ);X;X;X;X;X;X;X;X;X;X;X;X;X;X;X	XXXXXXXXXXXPPPPPPPPPPXXXXXXXXXX	FAN(0.048)LN(0.952)EQAAR	FAN(-12.99)LN(12.99)EQ(-62.97)AAR	5	2	0.405	29429000	29429000	0	0	0.16049	18100000	0.19828	6822300	0.13195	4506300	0.11161	18100000	0	0	6822300	0
Q08DH7	102	Q08DH7	Q08DH7	>sp|Q08DH7|AINX_BOVIN Alpha-internexin OS=Bos taurus GN=INA PE=2 SV=1	0.999956	43.5927	1.7865E-44	289.44	256.22	289.44					0.999956	43.5927	1.7865E-44	289.44						1	N	YKIIRTNEKEQLQGLNDRFAVFIEKVHQLET	X;X;X;X;X;X;X;X;X;X;X;X;X;X;X;Deamidation (NQ);X;X;X;X;X;X;X;X;X;X;X;X;X;X;X	XXXXXPPPPPPPPPPPPPXXXXXXXXXXXXX	TNEKEQLQGLN(1)DR	TN(-183.34)EKEQ(-96.11)LQ(-43.59)GLN(43.59)DR	11	2	3.3439	0	0	0	0	0	0	0	0	0	0	0	0	0	0	0	0
Q28115	73	Q28115	Q28115	>sp|Q28115|GFAP_BOVIN Glial fibrillary acidic protein OS=Bos taurus GN=GFAP PE=1 SV=2	1	58.6986	0.0554826	58.699	57.104	58.699	1	58.6986	0.0554826	58.699											N	FKETRASERAEMMELNDRFASYIEKVRFLEQ	X;X;X;X;X;X;X;X;X;X;X;Oxidation (M);Oxidation (M);X;X;Deamidation (NQ);X;X;X;X;X;X;X;X;X;X;X;X;X;X;X	XXXXXXXXXPPPPPPPPPXXXXXXXXXXXXX	AEMMELN(1)DR	AEMMELN(58.7)DR	7	2	-0.38648	1395900	1395900	0	0	0.010588	1395900	0.020811	0	0	0	0	1395900	0	0	0	0
Q28115	403	Q28115	Q28115	>sp|Q28115|GFAP_BOVIN Glial fibrillary acidic protein OS=Bos taurus GN=GFAP PE=1 SV=2	1	42.7185	0.059554	46.766	33.214	42.719	1	46.7664	0.0621225	46.766					1	42.7185	0.059554	42.719		1	N	TSLDTKSVSEGHLKRNIVVKTVEMRDGEVIK	X;X;X;X;X;X;X;X;X;X;X;X;X;X;X;Deamidation (NQ);X;X;X;X;X;X;X;Oxidation (M);X;X;X;X;X;X;X	XXXXXXXXXXXXXXPPPPPPXXXXXXXXXXX	RN(1)IVVK	RN(42.72)IVVK	2	2	0.72598	6164100	6164100	0	0	NaN	4824600	NaN	0	NaN	1339400	NaN	4824600	0	0	0	0
Q28115	245	Q28115	Q28115	>sp|Q28115|GFAP_BOVIN Glial fibrillary acidic protein OS=Bos taurus GN=GFAP PE=1 SV=2	1	70.6213	2.75897E-05	106.75	104.03	106.75	1	70.6213	2.75897E-05	106.75	0.999887	39.4663	0.0118726	60.062						1	N	ALREIRTQYEAVASSNMHEAEEWYRSKFADL	X;X;X;X;X;X;X;X;X;X;X;X;X;X;X;Deamidation (NQ);Oxidation (M);X;X;X;X;X;X;X;X;X;X;X;X;X;X	XXXXXXPPPPPPPPPPPPPPPPPPPXXXXXX	TQYEAVASSN(1)MHEAEEWYR	TQ(-70.62)YEAVASSN(70.62)MHEAEEWYR	10	3	0.1942	17858000	17858000	0	0	0.065476	11856000	0.086586	6002600	0.094883	0	0	11856000	0	0	6002600	0
Q28115	55	Q28115	Q28115	>sp|Q28115|GFAP_BOVIN Glial fibrillary acidic protein OS=Bos taurus GN=GFAP PE=1 SV=2	1	126.705	0.000347031	139.3	132.82	126.71	1	127.355	0.000347031	139.3	1	129.378	0.00050025	132.97	1	126.705	0.000651817	126.71		1	N	PPLPARVDFSLAGALNSGFKETRASERAEMM	X;X;X;X;X;X;X;X;X;X;X;X;X;X;X;Deamidation (NQ);X;X;X;X;X;X;X;X;X;X;X;X;X;Oxidation (M);Oxidation (M)	XXXXXXPPPPPPPPPPPPPPXXXXXXXXXXX	VDFSLAGALN(1)SGFK	VDFSLAGALN(126.71)SGFK	10	2	1.1225	33887000	33887000	0	0	0.36334	14244000	0.32221	11364000	0.43122	8278600	0.36465	14244000	0	0	11364000	0
F1MDZ2;O77788	283;283	F1MDZ2	F1MDZ2	>tr|F1MDZ2|F1MDZ2_BOVIN Neurofilament medium polypeptide OS=Bos taurus GN=NEFM PE=4 SV=2;>sp|O77788|NFM_BOVIN Neurofilament medium polypeptide OS=Bos taurus GN=NEFM PE=1 SV=3	0.631338	2.33659	0.00080953	111.62	111.46	111.62	0.631338	2.33659	0.00080953	111.62										1	Q	TALKEIRSQLESHSDQNMHQAEEWFKCRYAK	X;X;X;X;X;X;X;X;X;X;X;X;X;X;X;Deamidation (NQ);X;Oxidation (M);X;X;X;X;X;X;X;X;X;X;X;X;X	XXXXXXXPPPPPPPPPPPPPPPPPPPXXXXX	SQLESHSDQ(0.631)N(0.369)MHQAEEWFK	SQ(-50.14)LESHSDQ(2.34)N(-2.34)MHQ(-46.15)AEEWFK	9	3	0.26685	31417000	31417000	0	0	0.072699	31417000	0.14067	0	0	0	0	31417000	0	0	0	0
F1MEW3	164	F1MEW3	F1MEW3	>tr|F1MEW3|F1MEW3_BOVIN Microtubule-associated protein OS=Bos taurus GN=MAP2 PE=3 SV=1	0.5	0	0.0394611	43.37	42.686	43.37	0.5	0	0.0394611	43.37										1	Q	VEEGLLTASKMEFHDQQELTPSPAEPLDKKE	X;X;X;X;X;X;X;X;X;X;X;X;X;X;X;Deamidation (NQ);X;X;X;X;X;X;X;X;X;X;X;X;X;X;X	XXXXXXXXXXPPPPPPPPPPPPPPPPPPPPX	MEFHDQ(0.5)Q(0.5)ELTPSPAEPLDKK	MEFHDQ(0)Q(0)ELTPSPAEPLDKK	6	3	3.5531	17388000	17388000	0	0	0.047402	17388000	0.10139	0	0	0	0	17388000	0	0	0	0
F1MEW3	165	F1MEW3	F1MEW3	>tr|F1MEW3|F1MEW3_BOVIN Microtubule-associated protein OS=Bos taurus GN=MAP2 PE=3 SV=1	0.5	0	0.0394611	43.37	42.686	43.37	0.5	0	0.0394611	43.37										1	Q	EEGLLTASKMEFHDQQELTPSPAEPLDKKEK	X;X;X;X;X;X;X;X;X;X;X;X;X;X;X;X;X;X;X;X;X;X;X;X;X;X;X;X;X;X;X	XXXXXXXXXXXXXXXXXXXXXXXXXXXXXXX	MEFHDQ(0.5)Q(0.5)ELTPSPAEPLDKK	MEFHDQ(0)Q(0)ELTPSPAEPLDKK	7	3	3.5531	17388000	17388000	0	0	0.047402	17388000	0.10139	0	0	0	0	17388000	0	0	0	0
P49951;F1MPU0	1555;1541	P49951	P49951	>sp|P49951|CLH1_BOVIN Clathrin heavy chain 1 OS=Bos taurus GN=CLTC PE=1 SV=1;>tr|F1MPU0|F1MPU0_BOVIN Clathrin heavy chain 1 (Fragment) OS=Bos taurus GN=CLTC PE=4 SV=2	0.987267	18.895	9.54868E-05	117.18	114.61	117.18					0.987267	18.895	9.54868E-05	117.18						1	Q	YASESKDTELAEELLQWFLQEEKRECFGACL	X;X;X;X;X;X;X;X;X;X;X;X;X;X;X;Deamidation (NQ);X;X;X;X;X;X;X;X;X;X;X;X;X;X;X	XXXXXXPPPPPPPPPPPPPPPPPPXXXXXXX	DTELAEELLQ(0.987)WFLQ(0.013)EEKR	DTELAEELLQ(18.9)WFLQ(-18.9)EEKR	10	2	0.26627	0	0	0	0	0	0	0	0	0	0	0	0	0	0	0	0
P49951;F1MPU0	1083;1069	P49951	P49951	>sp|P49951|CLH1_BOVIN Clathrin heavy chain 1 OS=Bos taurus GN=CLTC PE=1 SV=1;>tr|F1MPU0|F1MPU0_BOVIN Clathrin heavy chain 1 (Fragment) OS=Bos taurus GN=CLTC PE=4 SV=2	0.99949	32.9268	1.98008E-13	164.94	162.65	164.94	0.99949	32.9268	1.98008E-13	164.94										1	Q	AFAIFRKFDVNTSAVQVLIEHIGNLDRAYEF	X;X;X;X;X;X;X;X;X;X;X;X;X;X;X;Deamidation (NQ);X;X;X;X;X;X;X;X;X;X;X;X;X;X;X	XXXXXXPPPPPPPPPPPPPPPPPPPPPXXXX	KFDVN(0.001)TSAVQ(0.999)VLIEHIGNLDR	KFDVN(-32.93)TSAVQ(32.93)VLIEHIGN(-72.04)LDR	10	3	4.3844	62919000	62919000	0	0	0.013043	62919000	0.028752	0	0	0	0	62919000	0	0	0	0
P49951;F1MPU0	374;361	P49951	P49951	>sp|P49951|CLH1_BOVIN Clathrin heavy chain 1 OS=Bos taurus GN=CLTC PE=1 SV=1;>tr|F1MPU0|F1MPU0_BOVIN Clathrin heavy chain 1 (Fragment) OS=Bos taurus GN=CLTC PE=4 SV=2	0.995756	23.7121	3.79481E-11	199.65	191.05	93.909	0.995756	23.7121	2.30265E-06	166.48	0.703275	3.76109	3.79481E-11	199.65	0.952694	13.0404	3.59655E-09	191.91		1	Q	GAEELFARKFNALFAQGNYSEAAKVAANAPK	X;X;X;X;X;X;X;X;X;X;X;X;X;X;X;Deamidation (NQ);X;X;X;X;X;X;X;X;X;X;X;X;X;X;X	XXXXXXXXPPPPPPPPPPPPPPPPXXXXXXX	KFNALFAQ(0.996)GN(0.004)YSEAAK	KFN(-50.96)ALFAQ(23.71)GN(-23.71)YSEAAK	8	3	-0.37647	1282400000	1282400000	0	0	0.25649	536810000	0.20342	195040000	0.14053	153460000	0.15773	536810000	0	0	195040000	0
P49951;F1MPU0	241;228	P49951	P49951	>sp|P49951|CLH1_BOVIN Clathrin heavy chain 1 OS=Bos taurus GN=CLTC PE=1 SV=1;>tr|F1MPU0|F1MPU0_BOVIN Clathrin heavy chain 1 (Fragment) OS=Bos taurus GN=CLTC PE=4 SV=2	0.5	0	0.0112564	55.011	52.298	44.045					0.5	0	0.0259045	48.899	0.5	0	0.0112564	55.011		1	Q	GKLHIIEVGTPPTGNQPFPKKAVDVFFPPEA	X;X;X;X;X;X;X;X;X;X;X;X;X;X;X;X;X;X;X;X;X;X;X;X;X;X;X;X;X;X;X	XXXXXXXXXXXXXXXXXXXXXXXXXXXXXXX	LHIIEVGTPPTGN(0.5)Q(0.5)PFPK	LHIIEVGTPPTGN(0)Q(0)PFPK	14	3	-3.7021	0	0	0	0	0	0	0	0	0	0	0	0	0	0	0	0
P49951;F1MPU0	1025;1011	P49951	P49951	>sp|P49951|CLH1_BOVIN Clathrin heavy chain 1 OS=Bos taurus GN=CLTC PE=1 SV=1;>tr|F1MPU0|F1MPU0_BOVIN Clathrin heavy chain 1 (Fragment) OS=Bos taurus GN=CLTC PE=4 SV=2	0.783975	6.11456	0.0081301	102.87	94.462	101.39	0.783975	6.11456	0.0081301	102.87										1	Q	KIVLDNSVFSEHRNLQNLLILTAIKADRTRV	X;X;X;X;X;Deamidation (NQ);X;X;X;X;X;X;X;X;X;Deamidation (NQ);X;X;X;X;X;X;X;X;X;X;X;X;X;X;X	XXXXXXXXXXXXXPPPPPPPPPPPPXXXXXX	N(0.024)LQ(0.784)N(0.192)LLILTAIK	N(-15.1)LQ(6.11)N(-6.11)LLILTAIK	3	2	0.69025	18736000	18736000	0	0	0.0083575	18736000	0.015208	0	0	0	0	18736000	0	0	0	0
P49951;F1MPU0	89;76	P49951	P49951	>sp|P49951|CLH1_BOVIN Clathrin heavy chain 1 OS=Bos taurus GN=CLTC PE=1 SV=1;>tr|F1MPU0|F1MPU0_BOVIN Clathrin heavy chain 1 (Fragment) OS=Bos taurus GN=CLTC PE=4 SV=2	0.806149	6.18948	0.0620248	47.894	23.662	47.894	0.806149	6.18948	0.0620248	47.894											Q	NPASKVIALKAGKTLQIFNIEMKSKMKAHTM	X;X;X;X;X;X;X;X;X;X;X;X;X;X;X;Deamidation (NQ);X;X;X;X;X;Oxidation (M);X;X;X;Oxidation (M);X;X;X;X;Oxidation (M)	XXXXXXXXXXXXXPPPPPPPPPPXXXXXXXX	TLQ(0.806)IFN(0.194)IEMK	TLQ(6.19)IFN(-6.19)IEMK	3	2	-0.077436	5709200	5709200	0	0	0.0024849	5709200	0.0056768	0	0	0	0	5709200	0	0	0	0
[truncated: 35 more columns]
