# Supplementary material for: The ∼16 kDa C-Terminal Sequence of Clathrin Assembly Protein AP180 Is Essential for Efficient Clathrin Binding
Source: PLoS One. 2014 Oct 20;9(10):e110557. doi: 10.1371/journal.pone.0110557 (PMC4203807; doi:10.1371/journal.pone.0110557)
Supplement: Data S2 — Contains the tabulated output of the MaxQuant software from processing the LC-MS/MS data of the tryptic digestion of purified clathrin. (ZIP) [file pone.0110557.s003.zip › txt/evidence.txt]

Sequence	Length	Modifications	Modified sequence	Deamidation (NQ) Probabilities	Oxidation (M) Probabilities	Deamidation (NQ) Score Diffs	Oxidation (M) Score Diffs	Acetyl (Protein N-term)	Deamidation (NQ)	Oxidation (M)	Missed cleavages	Proteins	Leading Proteins	Leading Razor Protein	Type	Raw file	Experiment	MS/MS m/z	Charge	m/z	Mass	Resolution	Uncalibrated - Calibrated m/z [ppm]	Uncalibrated - Calibrated m/z [Da]	Mass Error [ppm]	Mass Error [Da]	Uncalibrated Mass Error [ppm]	Uncalibrated Mass Error [Da]	Max intensity m/z 0	Retention time	Retention length	Calibrated retention time	Calibrated retention time start	Calibrated retention time finish	Retention time calibration	Match time difference	Match m/z difference	Match q-value	Match score	Number of data points	Number of scans	Number of isotopic peaks	PIF	Fraction of total spectrum	Base peak fraction	PEP	MS/MS Count	MS/MS Scan Number	Score
AAEQAHLWAELVFLYDKYEEYDNAIITMMNHPTDAWK	37	2 Oxidation (M)	_AAEQAHLWAELVFLYDKYEEYDNAIITM(ox)M(ox)NHPTDAWK_		AAEQAHLWAELVFLYDKYEEYDNAIITM(1)M(1)NHPTDAWK		AAEQAHLWAELVFLYDKYEEYDNAIITM(81.72)M(81.72)NHPTDAWK	0	0	2	1	P49951;F1MPU0	P49951	P49951	MULTI-MSMS	20140904-PurClathDigest-1ug-01	1	1116.27	4	1115.5226	4458.06131	19759.33	-2.8634	-0.0031942	0.34605	0.00038603	-2.5174	-0.0028082	1116.02528224222	58.06	3.7852	58.06	56.881	60.666	0					423	70	11	0	0	0	0.0098558	4	9518	87.005
AAEQAHLWAELVFLYDKYEEYDNAIITMMNHPTDAWK	37	2 Oxidation (M)	_AAEQAHLWAELVFLYDKYEEYDNAIITM(ox)M(ox)NHPTDAWK_		AAEQAHLWAELVFLYDKYEEYDNAIITM(1)M(1)NHPTDAWK		AAEQAHLWAELVFLYDKYEEYDNAIITM(46.76)M(46.76)NHPTDAWK	0	0	2	1	P49951;F1MPU0	P49951	P49951	MULTI-MSMS	20140904-PurClathDigest-1ug-01	1	1487.69	3	1487.02771	4458.06131	17045.63	-3.6734	-0.0054624	1.6012	0.002381	-2.0722	-0.0030814	1487.69861026071	57.915	0.58425	57.915	57.66	58.244	0					58	12	8	0	0	0	0.062372	1	9548	46.76
AAEQAHLWAELVFLYDKYEEYDNAIITMMNHPTDAWK	37	2 Oxidation (M)	_AAEQAHLWAELVFLYDKYEEYDNAIITM(ox)M(ox)NHPTDAWK_		AAEQAHLWAELVFLYDKYEEYDNAIITM(1)M(1)NHPTDAWK		AAEQAHLWAELVFLYDKYEEYDNAIITM(65.96)M(65.96)NHPTDAWK	0	0	2	1	P49951;F1MPU0	P49951	P49951	MULTI-MSMS	20140904-PurClathDigest-1ug-01	1	1116.02	4	1115.5226	4458.06131	19701	-3.4147	-0.0038092	0.86163	0.00096117	-2.553	-0.002848	1116.0251464571	61.747	3.5622	61.747	61.311	64.873	0					398	97	7	0	0	0	0.039319	3	10058	65.962
AAEQAHLWAELVFLYDKYEEYDNAIITMMNHPTDAWK	37	2 Oxidation (M)	_AAEQAHLWAELVFLYDKYEEYDNAIITM(ox)M(ox)NHPTDAWK_		AAEQAHLWAELVFLYDKYEEYDNAIITM(1)M(1)NHPTDAWK		AAEQAHLWAELVFLYDKYEEYDNAIITM(99.56)M(99.56)NHPTDAWK	0	0	2	1	P49951;F1MPU0	P49951	P49951	MULTI-MSMS	20140904-PurClathDigest-1ug-02	2	1116.02	4	1115.5226	4458.06131	19577.14	-1.9197	-0.0021415	-0.66397	-0.00074067	-2.5837	-0.0028822	1116.27277703663	58.004	1.921	58.004	57.395	59.316	3.8147E-06					211	33	12	0	0	0	0.0011596	2	8754	99.562
AAEQAHLWAELVFLYDKYEEYDNAIITMMNHPTDAWK	37	2 Oxidation (M)	_AAEQAHLWAELVFLYDKYEEYDNAIITM(ox)M(ox)NHPTDAWK_		AAEQAHLWAELVFLYDKYEEYDNAIITM(1)M(1)NHPTDAWK		AAEQAHLWAELVFLYDKYEEYDNAIITM(72.39)M(72.39)NHPTDAWK	0	0	2	1	P49951;F1MPU0	P49951	P49951	MULTI-MSMS	20140904-PurClathDigest-1ug-03	3	1116.27	4	1115.5226	4458.06131	19811.15	-2.5028	-0.0027919	0.15501	0.00017292	-2.3478	-0.002619	1116.27402768038	58.088	1.8014	58.088	57.684	59.486	0					166	29	11	0	0	0	0.019071	2	8441	72.389
AAEQAHLWAELVFLYDKYEEYDNAIITMMNHPTDAWK	37	2 Oxidation (M)	_AAEQAHLWAELVFLYDKYEEYDNAIITM(ox)M(ox)NHPTDAWK_		AAEQAHLWAELVFLYDKYEEYDNAIITM(1)M(1)NHPTDAWK		AAEQAHLWAELVFLYDKYEEYDNAIITM(61.96)M(61.96)NHPTDAWK	0	0	2	1	P49951;F1MPU0	P49951	P49951	MULTI-MSMS	20140904-PurClathDigest-1ug-03	3	1116.25	4	1115.5226	4458.06131	19734.09	-3.4751	-0.0038765	-0.045028	-5.0229E-05	-3.5201	-0.0039268	1116.27428945117	62.295	3.3322	62.295	61.319	64.651	0					373	114	4	0	0	0	0.046323	1	8886	61.96
AAKDEVSESR	10	Unmodified	_AAKDEVSESR_					0	0	0	1	P02548	P02548	P02548	MULTI-MSMS	20140904-PurClathDigest-1ug-01	1	546.27	2	546.27001	1090.52547	29233.35	-6.2967	-0.0034397	-0.41558	-0.00022702	-6.7122	-0.0036667	546.26972557032	30.416	0.30217	30.416	30.336	30.638	0					20	9	3	0	0	0	0.00015633	1	2582	141.1
AAKDEVSESR	10	Unmodified	_AAKDEVSESR_					0	0	0	1	P02548	P02548	P02548	MSMS	20140904-PurClathDigest-1ug-01	1	364.51	3	364.515765	1090.52547	NaN	NaN	NaN	NaN	NaN	NaN	NaN	NaN	30.42	1	30.42	29.92	30.92	0								0	0	0	2.7783E-06	1	2585	125.74
AAKDEVSESR	10	Unmodified	_AAKDEVSESR_					0	0	0	1	P02548	P02548	P02548	MULTI-MSMS	20140904-PurClathDigest-1ug-02	2	546.27	2	546.27001	1090.52547	29365.43	-5.1508	-0.0028137	-0.9559	-0.00052218	-6.1067	-0.0033359	546.269367844223	30.384	0.2865	30.384	30.295	30.581	0					16	8	2	0	0	0	0.00013594	1	2323	152.7
AAKDEVSESR	10	Unmodified	_AAKDEVSESR_					0	0	0	1	P02548	P02548	P02548	MULTI-MSMS	20140904-PurClathDigest-1ug-02	2	364.51	3	364.515765	1090.52547	33066.43	-4.8147	-0.001755	-1.4441	-0.0005264	-6.2588	-0.0022814	364.515249909724	30.384	0.31875	30.384	30.295	30.614	1.9073E-06					24	9	4	0	0	0	0.0014598	1	2327	125.74
AAKDEVSESR	10	Unmodified	_AAKDEVSESR_					0	0	0	1	P02548	P02548	P02548	MULTI-MSMS	20140904-PurClathDigest-1ug-03	3	546.27	2	546.27001	1090.52547	29336.26	-5.0755	-0.0027726	-0.22298	-0.00012181	-5.2985	-0.0028944	546.2698341944	30.38	0.34292	30.38	30.195	30.538	0					23	9	4	0	0	0	8.3958E-05	1	2187	165.63
AAKDEVSESR	10	Unmodified	_AAKDEVSESR_					0	0	0	1	P02548	P02548	P02548	MULTI-MSMS	20140904-PurClathDigest-1ug-03	3	364.51	3	364.515765	1090.52547	34623.75	-4.692	-0.0017103	-0.56789	-0.000207	-5.2599	-0.0019173	364.515642285532	30.389	0.336	30.389	30.304	30.64	0					25	9	4	0	0	0	0.012577	1	2198	88.596
AAKDEVSESRR	11	Unmodified	_AAKDEVSESRR_					0	0	0	2	P02548	P02548	P02548	MULTI-MSMS	20140904-PurClathDigest-1ug-01	1	416.55	3	416.549469	1246.62658	32586.56	-6.1002	-0.002541	0.31953	0.0001331	-5.7807	-0.0024079	416.549631206346	30.318	0.42634	30.318	30.211	30.638	1.9073E-06					38	13	4	0	0	0	0.00054758	1	2556	142.08
AAKDEVSESRR	11	Unmodified	_AAKDEVSESRR_					0	0	0	2	P02548	P02548	P02548	MULTI-MSMS	20140904-PurClathDigest-1ug-02	2	416.55	3	416.549469	1246.62658	32547.3	-5.0593	-0.0021074	-0.11722	-4.8826E-05	-5.1765	-0.0021563	416.549505813859	30.295	0.42467	30.295	30.189	30.614	0					39	13	4	0	0	0	0.00092461	1	2298	140.63
AAKDEVSESRR	11	Unmodified	_AAKDEVSESRR_					0	0	0	2	P02548	P02548	P02548	MULTI-MSMS	20140904-PurClathDigest-1ug-03	3	416.55	3	416.549469	1246.62658	32530.82	-5.0013	-0.0020833	0.14653	6.1038E-05	-4.8547	-0.0020222	416.549564545278	30.29	0.41092	30.29	30.195	30.606	0					32	11	5	0	0	0	0.00060675	1	2165	145.09
AALLELWELR	10	Unmodified	_AALLELWELR_					0	0	0	0	E1BFB0	E1BFB0	E1BFB0	MULTI-MSMS	20140904-PurClathDigest-1ug-01	1	607.35	2	607.350606	1212.68666	26730.84	-3.1481	-0.001912	-0.29902	-0.00018161	-3.4472	-0.0020936	607.350556383944	54.444	0.313	54.444	54.282	54.595	0					24	9	4	0	0	0	0.00033366	1	8844	125.75
AALLELWELR	10	Unmodified	_AALLELWELR_					0	0	0	0	E1BFB0	E1BFB0	E1BFB0	MULTI-MSMS	20140904-PurClathDigest-1ug-03	3	607.35	2	607.350606	1212.68666	27414.36	-2.7276	-0.0016566	-1.6163	-0.00098166	-4.3439	-0.0026382	607.349398628632	55.052	0.25875	55.052	54.928	55.187	0					16	6	3	0	0	0	0.0002195	1	7957	137.98
AAMGELYER	9	Oxidation (M)	_AAM(ox)GELYER_		AAM(1)GELYER		AAM(119.75)GELYER	0	0	1	0	F1MSQ6	F1MSQ6	F1MSQ6	MULTI-MSMS	20140904-PurClathDigest-1ug-02	2	528.24	2	528.244949	1054.47534	28668.28	-7.0081	-0.003702	0.17837	9.4221E-05	-6.8298	-0.0036078	528.245223768802	35.576	0.754	35.576	35.134	35.888	3.8147E-06					46	21	4	0	0	0	0.011558	1	3509	119.75
AAMGELYER	9	Oxidation (M)	_AAM(ox)GELYER_		AAM(1)GELYER		AAM(104.01)GELYER	0	0	1	0	F1MSQ6	F1MSQ6	F1MSQ6	MULTI-MSMS	20140904-PurClathDigest-1ug-03	3	528.24	2	528.244949	1054.47534	28286.44	-7.4993	-0.0039614	0.61454	0.00032463	-6.8847	-0.0036368	528.245333668154	35.492	0.66425	35.491	35.114	35.778	-3.8147E-06					38	18	4	0	0	0	0.032953	1	3313	104.01
AATASPPTDGTSGYSAR	17	Unmodified	_AATASPPTDGTSGYSAR_					0	0	0	0	F1N3M8;G3MYP5	F1N3M8;G3MYP5	G3MYP5	MULTI-MSMS	20140904-PurClathDigest-1ug-01	1	805.37	2	805.376266	1608.73798	23712.88	-5.8359	-0.0047001	0.045704	3.6809E-05	-5.7902	-0.0046633	805.376639500045	34.211	0.95816	34.211	33.755	34.713	0					104	30	7	0	0	0	0.00038506	1	3552	77.221
AATASPPTDGTSGYSAR	17	Unmodified	_AATASPPTDGTSGYSAR_					0	0	0	0	F1N3M8;G3MYP5	F1N3M8;G3MYP5	G3MYP5	MULTI-MSMS	20140904-PurClathDigest-1ug-02	2	805.37	2	805.376266	1608.73798	23688.42	-6.1024	-0.0049148	0.64117	0.00051638	-5.4613	-0.0043984	805.376980422023	34.493	0.96358	34.493	33.959	34.923	0					104	27	6	0	0	0	5.2812E-08	1	3243	137.61
AATASPPTDGTSGYSAR	17	Unmodified	_AATASPPTDGTSGYSAR_					0	0	0	0	F1N3M8;G3MYP5	F1N3M8;G3MYP5	G3MYP5	MULTI-MSMS	20140904-PurClathDigest-1ug-03	3	805.37	2	805.376266	1608.73798	23536.13	-5.7665	-0.0046442	0.34245	0.0002758	-5.4241	-0.0043684	805.376856712448	34.516	1.0304	34.516	33.985	35.015	0					108	29	6	0	0	0	3.1609E-08	1	3069	153.72
AAVTDVQR	8	Unmodified	_AAVTDVQR_					0	0	0	0	Q0P5A1	Q0P5A1	Q0P5A1	MULTI-MSMS	20140904-PurClathDigest-1ug-01	1	430.23	2	430.235242	858.45593	30387.22	-6.6679	-0.0028688	0.57127	0.00024578	-6.0967	-0.002623	430.235700202252	32.835	0.44617	32.835	32.637	33.083	0					37	13	4	0	0	0	0.027448	1	3188	89.752
AAVTDVQR	8	Unmodified	_AAVTDVQR_					0	0	0	0	Q0P5A1	Q0P5A1	Q0P5A1	MULTI-MSMS	20140904-PurClathDigest-1ug-02	2	430.23	2	430.235242	858.45593	32144.17	-6.3437	-0.0027293	0.085361	3.6725E-05	-6.2583	-0.0026925	430.235412255071	32.962	0.43341	32.962	32.795	33.228	0					32	11	4	0	0	0	0.057181	1	2917	75.692
AAVTDVQR	8	Unmodified	_AAVTDVQR_					0	0	0	0	Q0P5A1	Q0P5A1	Q0P5A1	MULTI-MSMS	20140904-PurClathDigest-1ug-03	3	430.23	2	430.235242	858.45593	31690.82	-6.5135	-0.0028024	0.058424	2.5136E-05	-6.4551	-0.0027772	430.235314461002	33.022	0.45542	33.022	32.851	33.306	0					28	11	4	0	0	0	0.050671	1	2762	78.77
ADDPSSYMEVVQAANTSGNWEELVK	25	Unmodified	_ADDPSSYMEVVQAANTSGNWEELVK_					0	0	0	0	P49951;F1MPU0	P49951	P49951	MULTI-MSMS	20140904-PurClathDigest-1ug-01	1	1371.12	2	1370.62397	2739.23339	18107.71	-2.949	-0.0040419	0.21485	0.00029448	-2.7341	-0.0037474	1371.12652499784	52.844	0.587	52.844	52.597	53.184	0					67	18	6	0	0	0	0.00032281	1	8406	88.976
ADDPSSYMEVVQAANTSGNWEELVK	25	Unmodified	_ADDPSSYMEVVQAANTSGNWEELVK_					0	0	0	0	P49951;F1MPU0	P49951	P49951	MULTI-MSMS	20140904-PurClathDigest-1ug-02	2	1371.12	2	1370.62397	2739.23339	18193.35	-3.0201	-0.0041394	-0.17789	-0.00024382	-3.1979	-0.0043832	1371.12595122695	52.934	0.59208	52.934	52.695	53.287	3.8147E-06					83	16	8	0	0	0	0.0094712	1	7758	74.222
ADDPSSYMEVVQAANTSGNWEELVK	25	Oxidation (M),Deamidation (NQ)	_ADDPSSYM(ox)EVVQAAN(de)TSGNWEELVK_	ADDPSSYMEVVQ(0.059)AAN(0.919)TSGN(0.022)WEELVK	ADDPSSYM(1)EVVQAANTSGNWEELVK	ADDPSSYMEVVQ(-11.92)AAN(11.92)TSGN(-16.13)WEELVK	ADDPSSYM(62.19)EVVQAANTSGNWEELVK	0	1	1	0	P49951;F1MPU0	P49951	P49951	MULTI-MSMS	20140904-PurClathDigest-1ug-02	2	1379.12	2	1379.11344	2756.21232	18269.21	-3.5022	-0.0048299	0.69759	0.00096206	-2.8046	-0.0038679	1379.61607570476	49.621	0.56041	49.621	49.296	49.857	0					64	15	7	0	0	0	0.027634	1	6950	62.193
ADITDDSPDGKLPASSFSPTALLGEGR	27	Unmodified	_ADITDDSPDGKLPASSFSPTALLGEGR_					0	0	0	1	F1N3M8;G3MYP5	F1N3M8;G3MYP5	G3MYP5	MULTI-MSMS	20140904-PurClathDigest-1ug-01	1	1359.67	2	1359.16686	2716.31917	18037.53	-3.567	-0.0048481	1.6884	0.0022948	-1.8786	-0.0025533	1359.67132170447	49.205	0.43117	49.205	48.996	49.427	-3.8147E-06					55	13	6	0	0	0	0.021459	1	7481	78.128
ADITDDSPDGKLPASSFSPTALLGEGR	27	Unmodified	_ADITDDSPDGKLPASSFSPTALLGEGR_					0	0	0	1	F1N3M8;G3MYP5	F1N3M8;G3MYP5	G3MYP5	MULTI-MSMS	20140904-PurClathDigest-1ug-02	2	1359.67	2	1359.16686	2716.31917	18063.28	-3.6337	-0.0049388	1.3531	0.001839	-2.2807	-0.0030998	1359.67064547062	49.391	0.49541	49.391	49.087	49.583	3.8147E-06					38	13	4	0	0	0	0.023546	1	6918	81.974
ADITDDSPDGKLPASSFSPTALLGEGR	27	Unmodified	_ADITDDSPDGKLPASSFSPTALLGEGR_					0	0	0	1	F1N3M8;G3MYP5	F1N3M8;G3MYP5	G3MYP5	MULTI-MSMS	20140904-PurClathDigest-1ug-03	3	1359.67	2	1359.16686	2716.31917	18239.73	-2.8647	-0.0038937	0.72064	0.00097947	-2.1441	-0.0029142	1359.66989412734	49.656	0.45175	49.656	49.462	49.913	0					51	12	6	0	0	0	0.011294	1	6710	93.166
ADLEMQIESLTEELAYLKK	19	Oxidation (M)	_ADLEM(ox)QIESLTEELAYLKK_		ADLEM(1)QIESLTEELAYLKK		ADLEM(156.13)QIESLTEELAYLKK	0	0	1	1	CON__P13645	CON__P13645	CON__P13645	MULTI-MSMS	20140904-PurClathDigest-1ug-01	1	747.72	3	747.383732	2239.12937	24624.72	-2.0539	-0.001535	-0.11188	-8.3621E-05	-2.1657	-0.0016186	747.718188456209	56.847	0.42142	56.847	56.634	57.055	0					52	9	7	0	0	0	8.0676E-09	1	9346	156.13
ADLEMQIESLTEELAYLKK	19	Oxidation (M)	_ADLEM(ox)QIESLTEELAYLKK_		ADLEM(1)QIESLTEELAYLKK		ADLEM(107.15)QIESLTEELAYLKK	0	0	1	1	CON__P13645	CON__P13645	CON__P13645	MULTI-MSMS	20140904-PurClathDigest-1ug-02	2	747.72	3	747.383732	2239.12937	24456.64	-1.2746	-0.00095259	0.52726	0.00039406	-0.7473	-0.00055852	747.718702259281	57.004	0.45716	57.004	56.706	57.163	0					41	8	6	0	0	0	0.00016844	1	8603	107.15
AEAESLYQSK	10	Unmodified	_AEAESLYQSK_					0	0	0	0	CON__P04264	CON__P04264	CON__P04264	MULTI-MSMS	20140904-PurClathDigest-1ug-03	3	563.27	2	563.274761	1124.53497	27541.25	-7.2961	-0.0041097	1.4807	0.00083405	-5.8154	-0.0032756	563.275602295316	35.576	0.23208	35.576	35.442	35.674	0					18	6	4	0	0	0	0.00010361	1	3347	160.53
AEALEQTIK	9	Unmodified	_AEALEQTIK_					0	0	0	0	F1N3M8;G3MYP5	F1N3M8;G3MYP5	G3MYP5	MULTI-MSMS	20140904-PurClathDigest-1ug-01	1	501.77	2	501.776939	1001.53933	29485.52	-5.6932	-0.0028567	0.30744	0.00015427	-5.3857	-0.0027024	501.776990144267	36.907	0.65709	36.907	36.656	37.313	0					69	20	5	0	0	0	0.00048025	1	4225	143.7
AEALEQTIK	9	Unmodified	_AEALEQTIK_					0	0	0	0	F1N3M8;G3MYP5	F1N3M8;G3MYP5	G3MYP5	MULTI-MSMS	20140904-PurClathDigest-1ug-02	2	501.78	2	501.776939	1001.53933	29373.52	-5.2932	-0.002656	0.10082	5.0588E-05	-5.1923	-0.0026054	501.776890239801	37.104	0.79	37.104	36.774	37.564	3.8147E-06					62	22	4	0	0	0	0.0004745	1	3868	149.72
AEALEQTIK	9	Unmodified	_AEALEQTIK_					0	0	0	0	F1N3M8;G3MYP5	F1N3M8;G3MYP5	G3MYP5	MULTI-MSMS	20140904-PurClathDigest-1ug-03	3	501.77	2	501.776939	1001.53933	29696.27	-5.4584	-0.0027389	-0.14027	-7.0382E-05	-5.5987	-0.0028093	501.776790690765	37.13	0.703	37.13	36.768	37.471	0					61	18	5	0	0	0	0.00047832	1	3680	145.72
AEEVAPKEELAAEAK	15	Unmodified	_AEEVAPKEELAAEAK_					0	0	0	1	F1MDZ2;O77788	F1MDZ2	F1MDZ2	MULTI-MSMS	20140904-PurClathDigest-1ug-01	1	792.9	2	792.90941	1583.80427	23909.25	-5.7004	-0.0045199	1.1758	0.00093228	-4.5246	-0.0035876	792.910587130708	36.027	0.34375	36.027	35.833	36.177	0					38	10	5	0	0	0	3.988E-05	1	4003	133.9
AEEVAPKEELAAEAK	15	Unmodified	_AEEVAPKEELAAEAK_					0	0	0	1	F1MDZ2;O77788	F1MDZ2	F1MDZ2	MULTI-SECPEP	20140904-PurClathDigest-1ug-01	1	529.09	3	528.942032	1583.80427	28553.36	-5.7687	-0.0030513	-0.69275	-0.00036643	-6.4614	-0.0034177	528.941637096906	36.046	0.50383	36.046	35.833	36.337	0					49	15	5	0	0	0	0.036167	1	4050	72.315
AEEVAPKEELAAEAK	15	Unmodified	_AEEVAPKEELAAEAK_					0	0	0	1	F1MDZ2;O77788	F1MDZ2	F1MDZ2	MULTI-MSMS	20140904-PurClathDigest-1ug-02	2	792.91	2	792.90941	1583.80427	24259.73	-5.0948	-0.0040397	1.4293	0.0011333	-3.6655	-0.0029064	792.91138113393	36.165	0.33225	36.165	35.983	36.316	0					37	9	5	0	0	0	2.3323E-05	1	3650	143.88
AEEVAPKEELAAEAK	15	Unmodified	_AEEVAPKEELAAEAK_					0	0	0	1	F1MDZ2;O77788	F1MDZ2	F1MDZ2	MULTI-SECPEP	20140904-PurClathDigest-1ug-03	3	792.89	2	792.90941	1583.80427	24293.7	-5.624	-0.0044594	1.8821	0.0014923	-3.7419	-0.002967	792.911761804747	36.172	0.30484	36.172	35.989	36.294	-3.8147E-06					33	8	5	0	0	0	0.059947	1	3505	49.988
AEIENYILTYK	11	Unmodified	_AEIENYILTYK_					0	0	0	0	E1BKN2	E1BKN2	E1BKN2	MULTI-MSMS	20140904-PurClathDigest-1ug-02	2	678.85	2	678.855918	1355.69728	25990.14	-4.233	-0.0028736	1.7274	0.0011727	-2.5056	-0.0017009	678.856547178563	47.962	0.45542	47.962	47.733	48.188	3.8147E-06					35	13	4	0	0	0	0.00096958	1	6555	111.63
AEIENYILTYK	11	Unmodified	_AEIENYILTYK_					0	0	0	0	E1BKN2	E1BKN2	E1BKN2	MULTI-MSMS	20140904-PurClathDigest-1ug-03	3	678.85	2	678.855918	1355.69728	25823.82	-3.5125	-0.0023845	1.1881	0.00080655	-2.3244	-0.001578	678.856415081023	47.901	0.47209	47.901	47.687	48.159	0					37	13	4	0	0	0	0.0070332	1	6290	91.961
AEITDAEGLGLK	12	Unmodified	_AEITDAEGLGLK_					0	0	0	0	F1MIC9	F1MIC9	F1MIC9	MULTI-MSMS	20140904-PurClathDigest-1ug-01	1	608.82	2	608.824618	1215.63468	26355.21	-5.6859	-0.0034617	0.91002	0.00055404	-4.7758	-0.0029076	608.825284651434	42.346	0.29967	42.346	42.18	42.479	-3.8147E-06					22	9	3	0	0	0	0.0045322	1	5662	98.105
AEMMELNDR	9	2 Oxidation (M)	_AEM(ox)M(ox)ELNDR_		AEM(1)M(1)ELNDR		AEM(120.33)M(120.33)ELNDR	0	0	2	0	Q28115	Q28115	Q28115	MULTI-MSMS	20140904-PurClathDigest-1ug-01	1	570.73	2	570.736631	1139.45871	27308.59	-7.067	-0.0040334	0.68715	0.00039218	-6.3798	-0.0036412	570.737302259217	32.137	0.69725	32.137	31.97	32.667	0					48	22	4	0	0	0	0.0028115	1	3004	120.33
AEMMELNDR	9	2 Oxidation (M)	_AEM(ox)M(ox)ELNDR_		AEM(1)M(1)ELNDR		AEM(104.48)M(104.48)ELNDR	0	0	2	0	Q28115	Q28115	Q28115	MULTI-MSMS	20140904-PurClathDigest-1ug-02	2	570.73	2	570.736631	1139.45871	27420.37	-6.8657	-0.0039185	0.58571	0.00033429	-6.28	-0.0035842	570.737275463934	32.219	0.5835	32.219	32.052	32.636	3.8147E-06					38	16	4	0	0	0	0.0050716	1	2732	104.48
AEMMELNDR	9	2 Oxidation (M)	_AEM(ox)M(ox)ELNDR_		AEM(1)M(1)ELNDR		AEM(99.86)M(99.86)ELNDR	0	0	2	0	Q28115	Q28115	Q28115	MULTI-MSMS	20140904-PurClathDigest-1ug-03	3	570.73	2	570.736631	1139.45871	27607.61	-7.1895	-0.0041033	0.46255	0.00026399	-6.7269	-0.0038393	570.737236813468	32.301	0.88367	32.301	32.068	32.951	3.8147E-06					49	24	5	0	0	0	0.0070116	1	2590	99.855
AEMMELNDR	9	2 Oxidation (M),Deamidation (NQ)	_AEM(ox)M(ox)ELN(de)DR_	AEMMELN(1)DR	AEM(1)M(1)ELNDR	AEMMELN(58.7)DR	AEM(58.7)M(58.7)ELNDR	0	1	2	0	Q28115	Q28115	Q28115	MULTI-SECPEP	20140904-PurClathDigest-1ug-01	1	570.81	2	571.228639	1140.44272	28068.08	-6.5922	-0.0037656	-0.3858	-0.00022038	-6.978	-0.003986	571.228252923337	32.888	0.29083	32.888	32.729	33.02	0					22	8	3	0	0	0	0.055483	1	3212	58.699
AEPAEAQSEEEEIEAQGEYDK	21	Unmodified	_AEPAEAQSEEEEIEAQGEYDK_					0	0	0	0	F1MEW3	F1MEW3	F1MEW3	MULTI-MSMS	20140904-PurClathDigest-1ug-01	1	1177	2	1176.50351	2350.99247	19302.79	-6.0639	-0.0071341	0.6979	0.00082108	-5.366	-0.0063131	1177.00551628389	41.403	1.1857	41.403	41.084	42.269	3.8147E-06					148	38	6	0	0	0	3.6689E-14	1	5363	164.94
AEPAEAQSEEEEIEAQGEYDK	21	Unmodified	_AEPAEAQSEEEEIEAQGEYDK_					0	0	0	0	F1MEW3	F1MEW3	F1MEW3	MULTI-MSMS	20140904-PurClathDigest-1ug-02	2	1177	2	1176.50351	2350.99247	19315.71	-5.9749	-0.0070295	0.89047	0.0010476	-5.0844	-0.0059819	1177.00591515041	41.514	0.887	41.514	41.269	42.156	3.8147E-06					111	26	6	0	0	0	5.7831E-13	1	4915	140.63
AEPAEAQSEEEEIEAQGEYDK	21	Unmodified	_AEPAEAQSEEEEIEAQGEYDK_					0	0	0	0	F1MEW3	F1MEW3	F1MEW3	MULTI-MSMS	20140904-PurClathDigest-1ug-03	3	1177	2	1176.50351	2350.99247	19291.08	-5.7424	-0.006756	0.03498	4.1154E-05	-5.7075	-0.0067148	1177.00490464379	41.493	1.2035	41.493	41.201	42.405	0					131	35	5	0	0	0	7.0152E-09	2	4665	124.2
AEPAEAQSEEEEIEAQGEYDKLLFR	25	Unmodified	_AEPAEAQSEEEEIEAQGEYDKLLFR_					0	0	0	1	F1MEW3	F1MEW3	F1MEW3	MULTI-MSMS	20140904-PurClathDigest-1ug-02	2	961.45	3	961.117319	2880.33013	21835.62	-2.7238	-0.0026179	-0.49309	-0.00047392	-3.2169	-0.0030918	961.451205122632	49.418	0.70408	49.418	49.087	49.791	0					70	19	5	0	0	0	0.020976	1	6909	63.979
AEPAEAQSEEEEIEAQGEYDKLLFR	25	Unmodified	_AEPAEAQSEEEEIEAQGEYDKLLFR_					0	0	0	1	F1MEW3	F1MEW3	F1MEW3	MULTI-MSMS	20140904-PurClathDigest-1ug-02	2	1441.67	2	1441.17234	2880.33013	17657.54	-3.5089	-0.005057	0.19307	0.00027825	-3.3159	-0.0047787	1441.67508535839	49.41	0.39225	49.41	49.227	49.619	-3.8147E-06					35	10	4	0	0	0	9.1957E-05	1	6925	107.75
AEPAEAQSEEEEIEAQGEYDKLLFR	25	Unmodified	_AEPAEAQSEEEEIEAQGEYDKLLFR_					0	0	0	1	F1MEW3	F1MEW3	F1MEW3	MULTI-MSMS	20140904-PurClathDigest-1ug-03	3	961.45	3	961.117319	2880.33013	21788.59	-2.8732	-0.0027615	-0.63607	-0.00061134	-3.5093	-0.0033728	961.45104634647	49.665	0.52125	49.665	49.427	49.948	0					57	14	5	0	0	0	0.02538	1	6693	56.131
AEPAEAQSEEEEIEAQGEYDKLLFR	25	Unmodified	_AEPAEAQSEEEEIEAQGEYDKLLFR_					0	0	0	1	F1MEW3	F1MEW3	F1MEW3	MULTI-MSMS	20140904-PurClathDigest-1ug-03	3	1441.67	2	1441.17234	2880.33013	17765.3	-2.6245	-0.0037824	-1.1239	-0.0016198	-3.7485	-0.0054022	1441.67418512371	49.676	0.382	49.676	49.498	49.88	-3.8147E-06					32	10	5	0	0	0	0.0001141	1	6713	111.11
AEPELDLAVK	10	Unmodified	_AEPELDLAVK_					0	0	0	0	F1MEW3	F1MEW3	F1MEW3	MULTI-MSMS	20140904-PurClathDigest-1ug-01	1	542.8	2	542.797872	1083.58119	28541.79	-5.8905	-0.0031973	-0.55074	-0.00029894	-6.4412	-0.0034963	542.797381595065	42.514	0.62749	42.514	42.299	42.927	0					37	20	3	0	0	0	0.053983	1	5694	66.056
AEPELDLAVK	10	Unmodified	_AEPELDLAVK_					0	0	0	0	F1MEW3	F1MEW3	F1MEW3	MULTI-MSMS	20140904-PurClathDigest-1ug-03	3	542.8	2	542.797872	1083.58119	28224.58	-5.757	-0.0031249	-0.7872	-0.00042729	-6.5442	-0.0035522	542.797444577397	42.888	0.75241	42.888	42.631	43.384	0					55	22	4	0	0	0	0.022104	1	5021	76.228
AESLQQEAEVLR	12	Unmodified	_AESLQQEAEVLR_					0	0	0	0	F1MIC9	F1MIC9	F1MIC9	MULTI-MSMS	20140904-PurClathDigest-1ug-01	1	686.85	2	686.85698	1371.69941	25570.17	-5.4413	-0.0037374	-0.6671	-0.0004582	-6.1084	-0.0041956	686.856374591887	42.864	0.38651	42.864	42.749	43.135	0					27	12	4	0	0	0	2.5626E-06	1	5805	151.98
AESLQQEAEVLR	12	Unmodified	_AESLQQEAEVLR_					0	0	0	0	F1MIC9	F1MIC9	F1MIC9	MULTI-MSMS	20140904-PurClathDigest-1ug-03	3	686.85	2	686.85698	1371.69941	25417.45	-6.452	-0.0044316	0.98061	0.00067354	-5.4714	-0.0037581	686.857588023268	43.283	0.32742	43.283	43.091	43.418	0					32	9	4	0	0	0	5.8977E-09	1	5133	198.32
AESPVKEEVPAKPVK	15	Unmodified	_AESPVKEEVPAKPVK_					0	0	0	2	F1MDZ2;O77788	F1MDZ2	F1MDZ2	MULTI-MSMS	20140904-PurClathDigest-1ug-01	1	536.64	3	536.638284	1606.89302	28646.9	-6.2679	-0.0033636	0.069321	3.72E-05	-6.1985	-0.0033264	536.97262656405	33.161	0.49683	33.161	32.893	33.39	0					38	15	4	0	0	0	0.0069544	1	3282	92.38
AESPVKEEVPAKPVK	15	Unmodified	_AESPVKEEVPAKPVK_					0	0	0	2	F1MDZ2;O77788	F1MDZ2	F1MDZ2	MULTI-MSMS	20140904-PurClathDigest-1ug-02	2	536.63	3	536.638284	1606.89302	28655.38	-5.8208	-0.0031236	0.22103	0.00011861	-5.5997	-0.003005	536.638411605286	33.342	0.52675	33.342	33.031	33.558	0					24	13	2	0	0	0	0.0019695	1	3004	110.97
AESPVKEEVPAKPVK	15	Unmodified	_AESPVKEEVPAKPVK_					0	0	0	2	F1MDZ2;O77788	F1MDZ2	F1MDZ2	MULTI-MSMS	20140904-PurClathDigest-1ug-02	2	402.73	4	402.730532	1606.89302	32772.96	-5.6235	-0.0022647	-0.48928	-0.00019705	-6.1127	-0.0024618	402.730447669901	33.351	0.44625	33.351	33.078	33.524	0					40	11	5	0	0	0	0.056666	1	3015	55.335
AESPVKEEVPAKPVK	15	Unmodified	_AESPVKEEVPAKPVK_					0	0	0	2	F1MDZ2;O77788	F1MDZ2	F1MDZ2	MULTI-MSMS	20140904-PurClathDigest-1ug-03	3	536.63	3	536.638284	1606.89302	28705.36	-5.9925	-0.0032158	0.27629	0.00014827	-5.7162	-0.0030676	536.638410486558	33.42	0.50525	33.42	33.139	33.644	0					22	12	2	0	0	0	0.00045892	1	2852	120.7
AFLQGGQEASDIALLLR	17	Unmodified	_AFLQGGQEASDIALLLR_					0	0	0	0	F1MIC9	F1MIC9	F1MIC9	MULTI-MSMS	20140904-PurClathDigest-1ug-01	1	901.99	2	901.493975	1800.9734	22399.67	-2.1655	-0.0019522	0.377	0.00033986	-1.7885	-0.0016123	901.995477067707	53.528	0.24916	53.528	53.415	53.665	0					26	7	5	0	0	0	2.6701E-11	1	8595	177.58
AFLQGGQEASDIALLLR	17	Unmodified	_AFLQGGQEASDIALLLR_					0	0	0	0	F1MIC9	F1MIC9	F1MIC9	MULTI-MSMS	20140904-PurClathDigest-1ug-02	2	902	2	901.493975	1800.9734	20549.47	-2.092	-0.0018859	-0.19535	-0.0001761	-2.2873	-0.002062	901.493493483707	53.848	0.63825	53.848	53.647	54.285	3.8147E-06					37	16	5	0	0	0	1.5536E-08	1	7973	153.72
AFLQGGQEASDIALLLR	17	Unmodified	_AFLQGGQEASDIALLLR_					0	0	0	0	F1MIC9	F1MIC9	F1MIC9	MULTI-MSMS	20140904-PurClathDigest-1ug-03	3	901.5	2	901.493975	1800.9734	22047.36	-2.5546	-0.0023029	0.86015	0.00077542	-1.6944	-0.0015275	901.494453621901	54.024	0.61609	54.024	53.833	54.449	-3.8147E-06					35	15	5	0	0	0	5.4375E-17	1	7720	215.23
AFMTADLPNELIELLEK	17	Oxidation (M),Deamidation (NQ)	_AFM(ox)TADLPN(de)ELIELLEK_	AFMTADLPN(1)ELIELLEK	AFM(1)TADLPNELIELLEK	AFMTADLPN(86)ELIELLEK	AFM(86)TADLPNELIELLEK	0	1	1	0	P49951;F1MPU0	P49951	P49951	MULTI-MSMS	20140904-PurClathDigest-1ug-01	1	982.5	2	982.500274	1962.986	21247.51	-0.77513	-0.00076156	-0.788	-0.00077421	-1.5631	-0.0015358	983.001075110124	55.932	0.95592	55.932	55.678	56.634	-3.8147E-06					85	22	5	0	0	0	0.002658	1	9170	86.005
AFMTADLPNELIELLEK	17	Oxidation (M),Deamidation (NQ)	_AFM(ox)TADLPN(de)ELIELLEK_	AFMTADLPN(1)ELIELLEK	AFM(1)TADLPNELIELLEK	AFMTADLPN(72.58)ELIELLEK	AFM(72.58)TADLPNELIELLEK	0	1	1	0	P49951;F1MPU0	P49951	P49951	MULTI-MSMS	20140904-PurClathDigest-1ug-02	2	983	2	982.500274	1962.986	21224	-1.7973	-0.0017659	-0.041468	-4.0742E-05	-1.8388	-0.0018066	983.001845254071	56.262	0.81525	56.262	55.991	56.806	-3.8147E-06					60	17	5	0	0	0	0.0089406	1	8484	72.583
AFMTADLPNELIELLEK	17	Oxidation (M),Deamidation (NQ)	_AFM(ox)TADLPN(de)ELIELLEK_	AFMTADLPN(1)ELIELLEK	AFM(1)TADLPNELIELLEK	AFMTADLPN(72.43)ELIELLEK	AFM(72.43)TADLPNELIELLEK	0	1	1	0	P49951;F1MPU0	P49951	P49951	MULTI-MSMS	20140904-PurClathDigest-1ug-03	3	983	2	982.500274	1962.986	21341.58	-1.5793	-0.0015517	-0.25453	-0.00025008	-1.8339	-0.0018018	983.001559732937	56.224	0.70925	56.224	56.026	56.736	-3.8147E-06					39	12	5	0	0	0	0.0082597	1	8197	72.433
AFMTADLPNELIELLEK	17	Oxidation (M)	_AFM(ox)TADLPNELIELLEK_		AFM(1)TADLPNELIELLEK		AFM(40.49)TADLPNELIELLEK	0	0	1	0	P49951;F1MPU0	P49951	P49951	MULTI-MSMS	20140904-PurClathDigest-1ug-01	1	655.34	3	655.007937	1962.00198	26132.67	-2.9549	-0.0019355	0.15189	9.9492E-05	-2.803	-0.001836	655.342537741293	58.654	2.6093	58.654	57.887	60.496	3.8147E-06					188	45	5	0	0	0	0.02991	1	9724	40.493
AFMTADLPNELIELLEK	17	Oxidation (M)	_AFM(ox)TADLPNELIELLEK_		AFM(1)TADLPNELIELLEK		AFM(46.25)TADLPNELIELLEK	0	0	1	0	P49951;F1MPU0	P49951	P49951	MULTI-SECPEP	20140904-PurClathDigest-1ug-01	1	982	2	982.008267	1962.00198	21245.15	-2.7064	-0.0026577	0.26864	0.00026381	-2.4378	-0.0023939	982.510040589882	58.376	3.7742	58.376	57.66	61.434	3.8147E-06					396	68	8	0	0	0	0.05557	1	10011	46.249
AFSTQMSITAGQK	13	Unmodified	_AFSTQMSITAGQK_					0	0	0	0	F1N757	F1N757	F1N757	MULTI-MSMS	20140904-PurClathDigest-1ug-03	3	685.34	2	685.342652	1368.67075	25405.8	-6.1468	-0.0042127	-2.1137	-0.0014486	-8.2604	-0.0056612	685.34119642273	41.086	0.41484	41.086	40.921	41.335	0					42	12	5	0	0	0	0.038856	1	4593	50.354
AFVHWYVGEGMEEGEFSEAR	20	Oxidation (M)	_AFVHWYVGEGM(ox)EEGEFSEAR_		AFVHWYVGEGM(1)EEGEFSEAR		AFVHWYVGEGM(98.57)EEGEFSEAR	0	0	1	0	Q2HJ86;F2Z4C1;F6RP72;F2Z4K0;Q32KN8;Q3ZCJ7;F1MNF8	Q2HJ86	Q2HJ86	MULTI-MSMS	20140904-PurClathDigest-1ug-01	1	783.01	3	782.675909	2345.0059	23849.79	-3.861	-0.0030219	0.057742	4.5193E-05	-3.8032	-0.0029767	783.010230067611	45.698	0.571	45.698	45.549	46.12	0					42	18	5	0	0	0	0.0001062	1	6558	98.573
AFVHWYVGEGMEEGEFSEAR	20	Oxidation (M)	_AFVHWYVGEGM(ox)EEGEFSEAR_		AFVHWYVGEGM(1)EEGEFSEAR		AFVHWYVGEGM(106.93)EEGEFSEAR	0	0	1	0	Q2HJ86;F2Z4C1;F6RP72;F2Z4K0;Q32KN8;Q3ZCJ7;F1MNF8	Q2HJ86	Q2HJ86	MULTI-MSMS	20140904-PurClathDigest-1ug-02	2	783.01	3	782.675909	2345.0059	23979.83	-3.9053	-0.0030566	-0.41938	-0.00032824	-4.3247	-0.0033848	783.009911700019	46.273	0.4615	46.273	46.137	46.599	0					46	14	5	0	0	0	3.9693E-06	1	6133	106.93
AFVHWYVGEGMEEGEFSEAR	20	Oxidation (M)	_AFVHWYVGEGM(ox)EEGEFSEAR_		AFVHWYVGEGM(1)EEGEFSEAR		AFVHWYVGEGM(106.93)EEGEFSEAR	0	0	1	0	Q2HJ86;F2Z4C1;F6RP72;F2Z4K0;Q32KN8;Q3ZCJ7;F1MNF8	Q2HJ86	Q2HJ86	MULTI-MSMS	20140904-PurClathDigest-1ug-03	3	783.01	3	782.675909	2345.0059	24011.76	-4.0768	-0.0031908	0.23657	0.00018516	-3.8402	-0.0030057	783.010520507225	46.178	0.49167	46.177	46.035	46.527	-3.8147E-06					52	15	5	0	0	0	5.8898E-06	1	5856	106.93
AGATLEIK	8	Unmodified	_AGATLEIK_					0	0	0	0	F1N1S2	F1N1S2	F1N1S2	MSMS	20140904-PurClathDigest-1ug-03	3	401.74	2	401.737086	801.459619	NaN	NaN	NaN	NaN	NaN	NaN	NaN	NaN	37.508	1	37.508	37.008	38.008	3.8147E-06								0	0	0	0.045557	1	3778	57.59
AGDSHASEEPEQTEPEQR	18	Unmodified	_AGDSHASEEPEQTEPEQR_					0	0	0	0	G3MYP5	G3MYP5	G3MYP5	MULTI-MSMS	20140904-PurClathDigest-1ug-01	1	998.92	2	998.927579	1995.84061	21037.08	-6.7273	-0.0067201	-0.058689	-5.8626E-05	-6.786	-0.0067787	998.927352631868	31.494	0.37008	31.494	31.342	31.713	0					40	11	5	0	0	0	1.6345E-17	1	2852	180.64
AGDSHASEEPEQTEPEQR	18	Unmodified	_AGDSHASEEPEQTEPEQR_					0	0	0	0	G3MYP5	G3MYP5	G3MYP5	MULTI-MSMS	20140904-PurClathDigest-1ug-01	1	666.28	3	666.287478	1995.84061	25907.79	-6.7725	-0.0045124	0.021656	1.4429E-05	-6.7508	-0.004498	666.621801639653	31.496	0.43375	31.496	31.342	31.776	0					45	13	5	0	0	0	2.7635E-05	1	2853	97.904
AGDSHASEEPEQTEPEQR	18	Unmodified	_AGDSHASEEPEQTEPEQR_					0	0	0	0	G3MYP5	G3MYP5	G3MYP5	MULTI-MSMS	20140904-PurClathDigest-1ug-02	2	666.62	3	666.287478	1995.84061	25910.81	-6.1134	-0.0040732	-0.077755	-5.1807E-05	-6.1911	-0.0041251	666.621732240475	31.474	0.5135	31.474	31.285	31.799	1.9073E-06					52	14	6	0	0	0	2.1001E-06	1	2567	121.82
AGDSHASEEPEQTEPEQR	18	Unmodified	_AGDSHASEEPEQTEPEQR_					0	0	0	0	G3MYP5	G3MYP5	G3MYP5	MULTI-MSMS	20140904-PurClathDigest-1ug-02	2	999.42	2	998.927579	1995.84061	21004.33	-6.4024	-0.0063955	-0.041348	-4.1303E-05	-6.4437	-0.0064368	998.927529536512	31.475	0.37659	31.475	31.321	31.698	0					37	10	5	0	0	0	4.6409E-08	1	2572	145.69
AGDSHASEEPEQTEPEQR	18	Unmodified	_AGDSHASEEPEQTEPEQR_					0	0	0	0	G3MYP5	G3MYP5	G3MYP5	MULTI-MSMS	20140904-PurClathDigest-1ug-03	3	666.62	3	666.287478	1995.84061	26031.01	-5.4132	-0.0036067	-0.17367	-0.00011572	-5.5869	-0.0037225	666.287582993473	31.512	0.54708	31.512	31.324	31.871	0					54	14	6	0	0	0	1.3715E-08	1	2426	140.49
AGDSHASEEPEQTEPEQR	18	Unmodified	_AGDSHASEEPEQTEPEQR_					0	0	0	0	G3MYP5	G3MYP5	G3MYP5	MULTI-MSMS	20140904-PurClathDigest-1ug-03	3	998.92	2	998.927579	1995.84061	21248.82	-5.7323	-0.0057262	-0.082326	-8.2238E-05	-5.8147	-0.0058084	998.927409496017	31.518	0.46833	31.518	31.366	31.834	1.9073E-06					36	12	6	0	0	0	5.9571E-18	1	2436	212.95
AGDSHASEEPEQTEPEQREPTPYPDER	27	Unmodified	_AGDSHASEEPEQTEPEQREPTPYPDER_					0	0	0	1	G3MYP5	G3MYP5	G3MYP5	MULTI-MSMS	20140904-PurClathDigest-1ug-01	1	771.34	4	771.088063	3080.32314	24178.65	-6.6193	-0.0051041	1.3141	0.0010133	-5.3052	-0.0040908	771.340071746779	35.085	0.37508	35.085	34.906	35.281	0					48	11	6	0	0	0	0.050541	1	3770	24.2
AGDSHASEEPEQTEPEQREPTPYPDER	27	Unmodified	_AGDSHASEEPEQTEPEQREPTPYPDER_					0	0	0	1	G3MYP5	G3MYP5	G3MYP5	MULTI-MSMS	20140904-PurClathDigest-1ug-01	1	1028.44	3	1027.78166	3080.32314	21226.66	-7.1658	-0.0073649	0.017845	1.8341E-05	-7.148	-0.0073466	1028.11600339067	35.09	0.37508	35.09	34.906	35.281	0					54	11	6	0	0	0	0.012449	1	3771	67.655
AGDSHASEEPEQTEPEQREPTPYPDER	27	Unmodified	_AGDSHASEEPEQTEPEQREPTPYPDER_					0	0	0	1	G3MYP5	G3MYP5	G3MYP5	MULTI-MSMS	20140904-PurClathDigest-1ug-02	2	1028.11	3	1027.78166	3080.32314	21427.96	-7.1863	-0.007386	0.17929	0.00018427	-7.007	-0.0072017	1028.11609866391	35.381	0.52283	35.381	35.134	35.657	0					57	14	6	0	0	0	0.047194	1	3461	46.862
AGDSHASEEPEQTEPEQREPTPYPDER	27	Unmodified	_AGDSHASEEPEQTEPEQREPTPYPDER_					0	0	0	1	G3MYP5	G3MYP5	G3MYP5	MULTI-MSMS	20140904-PurClathDigest-1ug-02	2	771.59	4	771.088063	3080.32314	24268.59	-7.0191	-0.0054123	1.5502	0.0011953	-5.4689	-0.004217	771.340225381387	35.389	0.48783	35.389	35.169	35.657	0					64	13	6	0	0	0	0.0044017	1	3467	85.376
AGDSHASEEPEQTEPEQREPTPYPDER	27	Unmodified	_AGDSHASEEPEQTEPEQREPTPYPDER_					0	0	0	1	G3MYP5	G3MYP5	G3MYP5	MULTI-MSMS	20140904-PurClathDigest-1ug-03	3	771.34	4	771.088063	3080.32314	24045.81	-7.555	-0.0058256	1.5829	0.0012205	-5.9722	-0.0046051	771.340142929217	35.263	0.52675	35.263	35.081	35.608	0					54	14	6	0	0	0	0.00014017	2	3267	92.518
AGDSHASEEPEQTEPEQREPTPYPDER	27	Unmodified	_AGDSHASEEPEQTEPEQREPTPYPDER_					0	0	0	1	G3MYP5	G3MYP5	G3MYP5	MULTI-MSMS	20140904-PurClathDigest-1ug-03	3	1028.11	3	1027.78166	3080.32314	21214.13	-8.0106	-0.0082332	0.50793	0.00052204	-7.5027	-0.0077111	1028.11643629333	35.255	0.55984	35.255	35.048	35.608	0					58	15	6	0	0	0	0.010833	1	3272	78.098
AGEPQDQAVEQK	12	Unmodified	_AGEPQDQAVEQK_					0	0	0	0	F1N3M8;G3MYP5	F1N3M8;G3MYP5	G3MYP5	MULTI-MSMS	20140904-PurClathDigest-1ug-01	1	650.31	2	650.312406	1298.61026	26033.1	-7.6054	-0.0049459	-0.046222	-3.0059E-05	-7.6516	-0.0049759	650.312516953013	31.84	0.86675	31.84	31.621	32.488	0					80	27	4	0	0	0	0.00020018	1	2918	120.84
AGEPQDQAVEQK	12	Unmodified	_AGEPQDQAVEQK_					0	0	0	0	F1N3M8;G3MYP5	F1N3M8;G3MYP5	G3MYP5	MULTI-MSMS	20140904-PurClathDigest-1ug-02	2	650.31	2	650.312406	1298.61026	26000.79	-7.4403	-0.0048386	0.041677	2.7103E-05	-7.3987	-0.0048114	650.312559395813	31.85	1.1021	31.85	31.596	32.698	1.9073E-06					89	31	5	0	0	0	3.3931E-06	2	2639	145.29
AGEPQDQAVEQK	12	Unmodified	_AGEPQDQAVEQK_					0	0	0	0	F1N3M8;G3MYP5	F1N3M8;G3MYP5	G3MYP5	MULTI-MSMS	20140904-PurClathDigest-1ug-03	3	650.31	2	650.312406	1298.61026	26020.09	-7.9674	-0.0051813	0.45757	0.00029756	-7.5098	-0.0048837	650.312854439265	31.901	0.98908	31.901	31.66	32.649	0					84	26	5	0	0	0	8.5759E-06	2	2498	142.1
AGFAGDQIPK	10	Unmodified	_AGFAGDQIPK_					0	0	0	0	F2Z4F0	F2Z4F0	F2Z4F0	MULTI-MSMS	20140904-PurClathDigest-1ug-01	1	502.26	2	502.263999	1002.51345	30181.41	-6.0358	-0.0030316	0.73157	0.00036744	-5.3043	-0.0026641	502.264260390685	38.762	0.30192	38.762	38.637	38.939	0					23	9	4	0	0	0	0.032484	1	4725	81.017
AGFAGDQIPK	10	Unmodified	_AGFAGDQIPK_					0	0	0	0	F2Z4F0	F2Z4F0	F2Z4F0	MULTI-MSMS	20140904-PurClathDigest-1ug-02	2	502.26	2	502.263999	1002.51345	29897.24	-5.0473	-0.0025351	0.27335	0.00013729	-4.774	-0.0023978	502.264061091075	39.183	0.36008	39.183	38.994	39.354	3.8147E-06					27	10	4	0	0	0	0.0088404	1	4366	98.04
AGFAGDQIPK	10	Unmodified	_AGFAGDQIPK_					0	0	0	0	F2Z4F0	F2Z4F0	F2Z4F0	MULTI-MSMS	20140904-PurClathDigest-1ug-03	3	502.26	2	502.263999	1002.51345	29936.13	-5.0275	-0.0025251	0.42692	0.00021443	-4.6006	-0.0023107	502.264057230319	39.308	0.43066	39.308	39.076	39.507	0					29	12	4	0	0	0	0.017409	1	4173	90.142
AGGVSGTHHPRPGHDPPPLPQPDPR	25	Unmodified	_AGGVSGTHHPRPGHDPPPLPQPDPR_					0	0	0	1	F1N3M8;G3MYP5	F1N3M8;G3MYP5	G3MYP5	MULTI-MSMS	20140904-PurClathDigest-1ug-01	1	645.07	4	644.827089	2575.27925	25979.38	-6.1477	-0.0039642	-1.0234	-0.0006599	-7.1711	-0.0046241	645.077394617414	33.448	1.289	33.448	33.051	34.34	0					122	41	6	0	0	0	0.043301	1	3342	45.099
AGGVSGTHHPRPGHDPPPLPQPDPR	25	Unmodified	_AGGVSGTHHPRPGHDPPPLPQPDPR_					0	0	0	1	F1N3M8;G3MYP5	F1N3M8;G3MYP5	G3MYP5	MULTI-MSMS	20140904-PurClathDigest-1ug-02	2	645.07	4	644.827089	2575.27925	25878.81	-5.3108	-0.0034245	-1.395	-0.00089955	-6.7058	-0.0043241	645.077087080427	33.707	1.6937	33.707	33.195	34.889	3.8147E-06					149	48	6	0	0	0	0.015863	1	3077	71.696
AGLLQR	6	Unmodified	_AGLLQR_					0	0	0	0	P49951;F1MPU0	P49951	P49951	MULTI-MSMS	20140904-PurClathDigest-1ug-01	1	329.2	2	329.205756	656.396959	36634.74	-6.5781	-0.0021655	-0.26119	-8.5984E-05	-6.8392	-0.0022515	329.205713527803	35.727	2.8359	35.727	35.312	38.148	0					227	89	5	0	0	0	0.010454	5	3873	105.82
AGLLQR	6	Unmodified	_AGLLQR_					0	0	0	0	P49951;F1MPU0	P49951	P49951	MULTI-MSMS	20140904-PurClathDigest-1ug-02	2	329.2	2	329.205756	656.396959	36623.33	-5.7942	-0.0019075	-1.0162	-0.00033455	-6.8104	-0.002242	329.20547027292	36.07	2.5543	36.07	35.788	38.342	0					178	74	4	0	0	0	0.010454	4	3722	112.88
AGLLQR	6	Unmodified	_AGLLQR_					0	0	0	0	P49951;F1MPU0	P49951	P49951	MULTI-MSMS	20140904-PurClathDigest-1ug-03	3	329.2	2	329.205756	656.396959	36670	-5.9852	-0.0019704	-1.1505	-0.00037876	-7.1357	-0.0023491	329.205425578838	36.086	2.5918	36.086	35.708	38.3	0					182	70	5	0	0	0	0.010454	5	3544	112.58
AGPELPSGDPAPAPEGPTAPR	21	Unmodified	_AGPELPSGDPAPAPEGPTAPR_					0	0	0	0	E1BP30;F1MQZ0	E1BP30	E1BP30	MULTI-MSMS	20140904-PurClathDigest-1ug-01	1	992.99	2	992.492161	1982.96977	21218.47	-5.005	-0.0049674	0.31678	0.0003144	-4.6882	-0.004653	992.993818446507	39.853	0.33292	39.853	39.671	40.004	0					39	10	5	0	0	0	0.051135	1	5005	60.621
AGPELPSGDPAPAPEGPTAPR	21	Unmodified	_AGPELPSGDPAPAPEGPTAPR_					0	0	0	0	E1BP30;F1MQZ0	E1BP30	E1BP30	MULTI-MSMS	20140904-PurClathDigest-1ug-02	2	992.99	2	992.492161	1982.96977	21195.1	-4.7655	-0.0047298	0.77081	0.00076502	-3.9947	-0.0039647	992.994271915969	40.206	0.36742	40.206	40.01	40.377	0					40	10	5	0	0	0	0.023355	1	4613	59.857
AGTFQAFEQFGQQLLAHGHYASPEIK	26	Unmodified	_AGTFQAFEQFGQQLLAHGHYASPEIK_					0	0	0	0	E1BFB0	E1BFB0	E1BFB0	MULTI-MSMS	20140904-PurClathDigest-1ug-01	1	719.86	4	719.609508	2874.40893	25005.26	-1.6006	-0.0011518	0.61957	0.00044585	-0.98104	-0.00070597	719.860606097067	52.96	0.50333	52.96	52.816	53.319	0					52	15	6	0	0	0	1.8226E-12	1	8445	131.94
AGTFQAFEQFGQQLLAHGHYASPEIK	26	Unmodified	_AGTFQAFEQFGQQLLAHGHYASPEIK_					0	0	0	0	E1BFB0	E1BFB0	E1BFB0	MULTI-MSMS	20140904-PurClathDigest-1ug-02	2	719.86	4	719.609508	2874.40893	24942.27	-2.4769	-0.0017824	0.59761	0.00043005	-1.8793	-0.0013523	719.860146481238	53.3	0.79292	53.3	53.049	53.842	0					66	21	5	0	0	0	2.9593E-06	1	7836	84.68
AHIAQLCEK	9	Unmodified	_AHIAQLCEK_					0	0	0	0	P49951;F1MPU0	P49951	P49951	MULTI-MSMS	20140904-PurClathDigest-1ug-02	2	506.76	2	506.765852	1011.51715	28944.43	-5.2261	-0.0026484	-1.5931	-0.00080735	-6.8192	-0.0034557	506.764883582538	36.291	0.71308	36.291	35.919	36.632	-3.8147E-06					48	20	4	0	0	0	0.00028117	1	3698	166.07
AHMGMFTELAILYSK	15	2 Oxidation (M)	_AHM(ox)GM(ox)FTELAILYSK_		AHM(1)GM(1)FTELAILYSK		AHM(129.77)GM(129.77)FTELAILYSK	0	0	2	0	P49951;F1MPU0	P49951	P49951	MULTI-MSMS	20140904-PurClathDigest-1ug-01	1	582.29	3	581.952998	1742.83716	27331.17	-3.8936	-0.0022659	-0.59017	-0.00034345	-4.4838	-0.0026093	581.953355289852	46.766	0.75484	46.766	46.457	47.211	0					153	24	8	0	0	0	1.7665E-05	3	6789	129.77
AHMGMFTELAILYSK	15	2 Oxidation (M)	_AHM(ox)GM(ox)FTELAILYSK_		AHM(1)GM(1)FTELAILYSK		AHM(139.66)GM(139.66)FTELAILYSK	0	0	2	0	P49951;F1MPU0	P49951	P49951	MULTI-MSMS	20140904-PurClathDigest-1ug-01	1	872.92	2	872.425858	1742.83716	22492.9	-3.8911	-0.0033947	-1.593	-0.0013898	-5.4841	-0.0047844	872.425565242456	46.757	0.90867	46.757	46.303	47.211	3.8147E-06					166	29	8	0	0	0	1.0543E-05	3	6792	139.66
AHMGMFTELAILYSK	15	2 Oxidation (M)	_AHM(ox)GM(ox)FTELAILYSK_		AHM(1)GM(1)FTELAILYSK		AHM(88.22)GM(88.22)FTELAILYSK	0	0	2	0	P49951;F1MPU0	P49951	P49951	MULTI-MSMS	20140904-PurClathDigest-1ug-01	1	581.95	3	581.952998	1742.83716	27589.15	-3.8187	-0.0022223	0.036921	2.1486E-05	-3.7818	-0.0022008	581.953354502786	47.563	0.94225	47.563	47.117	48.06	0					144	30	7	0	0	0	0.002539	3	6977	88.224
AHMGMFTELAILYSK	15	2 Oxidation (M)	_AHM(ox)GM(ox)FTELAILYSK_		AHM(1)GM(1)FTELAILYSK		AHM(130.47)GM(130.47)FTELAILYSK	0	0	2	0	P49951;F1MPU0	P49951	P49951	MULTI-MSMS	20140904-PurClathDigest-1ug-01	1	872.92	2	872.425858	1742.83716	22499.75	-3.7298	-0.003254	-0.54219	-0.00047302	-4.272	-0.003727	872.425790359002	47.684	3.1298	47.684	47.148	50.278	0					213	102	6	0	0	0	1.8384E-05	4	6987	130.47
AHMGMFTELAILYSK	15	2 Oxidation (M)	_AHM(ox)GM(ox)FTELAILYSK_		AHM(1)GM(1)FTELAILYSK		AHM(84.75)GM(84.75)FTELAILYSK	0	0	2	0	P49951;F1MPU0	P49951	P49951	MULTI-MSMS	20140904-PurClathDigest-1ug-01	1	582.28	3	581.952998	1742.83716	27852.03	-2.9945	-0.0017426	0.00038739	2.2544E-07	-2.9941	-0.0017424	581.953221506594	48.769	2.7417	48.769	47.878	50.62	0					328	89	5	0	0	0	0.003368	4	7374	84.753
AHMGMFTELAILYSK	15	2 Oxidation (M)	_AHM(ox)GM(ox)FTELAILYSK_		AHM(1)GM(1)FTELAILYSK		AHM(101.75)GM(101.75)FTELAILYSK	0	0	2	0	P49951;F1MPU0	P49951	P49951	MULTI-MSMS	20140904-PurClathDigest-1ug-01	1	872.43	2	872.425858	1742.83716	23022.16	-3.0345	-0.0026474	1.0356	0.00090346	-1.9989	-0.0017439	872.92827683819	61.445	0.88325	61.445	61.174	62.057	0					59	17	5	0	0	0	0.00027222	1	10077	101.75
AHMGMFTELAILYSK	15	2 Oxidation (M)	_AHM(ox)GM(ox)FTELAILYSK_		AHM(1)GM(1)FTELAILYSK		AHM(125.36)GM(125.36)FTELAILYSK	0	0	2	0	P49951;F1MPU0	P49951	P49951	MSMS	20140904-PurClathDigest-1ug-01	1	872.42	2	872.425858	1742.83716	NaN	NaN	NaN	NaN	NaN	NaN	NaN	NaN	48.032	1	48.032	47.532	48.532	0								0	0	0	3.0563E-07	1	7180	125.36
AHMGMFTELAILYSK	15	2 Oxidation (M)	_AHM(ox)GM(ox)FTELAILYSK_		AHM(1)GM(1)FTELAILYSK		AHM(122.63)GM(122.63)FTELAILYSK	0	0	2	0	P49951;F1MPU0	P49951	P49951	MSMS	20140904-PurClathDigest-1ug-01	1	872.42	2	872.425858	1742.83716	NaN	NaN	NaN	NaN	NaN	NaN	NaN	NaN	48.765	1	48.765	48.265	49.265	0								0	0	0	3.8766E-07	1	7373	122.63
AHMGMFTELAILYSK	15	2 Oxidation (M)	_AHM(ox)GM(ox)FTELAILYSK_		AHM(1)GM(1)FTELAILYSK		AHM(123.76)GM(123.76)FTELAILYSK	0	0	2	0	P49951;F1MPU0	P49951	P49951	MSMS	20140904-PurClathDigest-1ug-01	1	872.42	2	872.425858	1742.83716	NaN	NaN	NaN	NaN	NaN	NaN	NaN	NaN	49.248	1	49.248	48.748	49.748	0								0	0	0	3.5369E-07	1	7501	123.76
AHMGMFTELAILYSK	15	2 Oxidation (M)	_AHM(ox)GM(ox)FTELAILYSK_		AHM(1)GM(1)FTELAILYSK		AHM(125.36)GM(125.36)FTELAILYSK	0	0	2	0	P49951;F1MPU0	P49951	P49951	MULTI-MSMS	20140904-PurClathDigest-1ug-02	2	872.92	2	872.425858	1742.83716	22544.21	-4.3196	-0.0037685	-0.8155	-0.00071146	-5.1351	-0.00448	872.426074313375	47.301	4.0342	47.301	46.569	50.603	0					473	123	8	0	0	0	1.5052E-05	8	6742	133.48
AHMGMFTELAILYSK	15	2 Oxidation (M)	_AHM(ox)GM(ox)FTELAILYSK_		AHM(1)GM(1)FTELAILYSK		AHM(102.52)GM(102.52)FTELAILYSK	0	0	2	0	P49951;F1MPU0	P49951	P49951	MULTI-MSMS	20140904-PurClathDigest-1ug-02	2	872.43	2	872.425858	1742.83716	23085.53	-2.4507	-0.0021381	-0.28354	-0.00024737	-2.7342	-0.0023854	872.425151701046	61.547	1.0865	61.547	61.272	62.358	0					39	17	4	0	0	0	0.00039268	1	9224	102.52
AHMGMFTELAILYSK	15	2 Oxidation (M)	_AHM(ox)GM(ox)FTELAILYSK_		AHM(1)GM(1)FTELAILYSK		AHM(79.61)GM(79.61)FTELAILYSK	0	0	2	0	P49951;F1MPU0	P49951	P49951	MSMS	20140904-PurClathDigest-1ug-02	2	581.95	3	581.952998	1742.83716	NaN	NaN	NaN	NaN	NaN	NaN	NaN	NaN	47.796	1	47.796	47.296	48.296	0								0	0	0	0.0020932	1	6531	79.614
AHMGMFTELAILYSK	15	2 Oxidation (M)	_AHM(ox)GM(ox)FTELAILYSK_		AHM(1)GM(1)FTELAILYSK		AHM(85.45)GM(85.45)FTELAILYSK	0	0	2	0	P49951;F1MPU0	P49951	P49951	MSMS	20140904-PurClathDigest-1ug-02	2	581.95	3	581.952998	1742.83716	NaN	NaN	NaN	NaN	NaN	NaN	NaN	NaN	48.055	1	48.055	47.555	48.555	-3.8147E-06								0	0	0	0.0061205	1	6594	85.45
AHMGMFTELAILYSK	15	2 Oxidation (M)	_AHM(ox)GM(ox)FTELAILYSK_		AHM(1)GM(1)FTELAILYSK		AHM(90.76)GM(90.76)FTELAILYSK	0	0	2	0	P49951;F1MPU0	P49951	P49951	MSMS	20140904-PurClathDigest-1ug-02	2	581.95	3	581.952998	1742.83716	NaN	NaN	NaN	NaN	NaN	NaN	NaN	NaN	48.384	1	48.384	47.884	48.884	0								0	0	0	0.00052488	1	6680	90.759
AHMGMFTELAILYSK	15	2 Oxidation (M)	_AHM(ox)GM(ox)FTELAILYSK_		AHM(1)GM(1)FTELAILYSK		AHM(68.04)GM(68.04)FTELAILYSK	0	0	2	0	P49951;F1MPU0	P49951	P49951	MSMS	20140904-PurClathDigest-1ug-02	2	581.95	3	581.952998	1742.83716	NaN	NaN	NaN	NaN	NaN	NaN	NaN	NaN	48.661	1	48.661	48.161	49.161	0								0	0	0	0.021332	1	6748	68.044
AHMGMFTELAILYSK	15	2 Oxidation (M)	_AHM(ox)GM(ox)FTELAILYSK_		AHM(1)GM(1)FTELAILYSK		AHM(85.84)GM(85.84)FTELAILYSK	0	0	2	0	P49951;F1MPU0	P49951	P49951	MSMS	20140904-PurClathDigest-1ug-02	2	581.95	3	581.952998	1742.83716	NaN	NaN	NaN	NaN	NaN	NaN	NaN	NaN	49.552	1	49.552	49.052	50.052	0								0	0	0	0.00067499	1	6959	85.837
AHMGMFTELAILYSK	15	2 Oxidation (M)	_AHM(ox)GM(ox)FTELAILYSK_		AHM(1)GM(1)FTELAILYSK		AHM(128.35)GM(128.35)FTELAILYSK	0	0	2	0	P49951;F1MPU0	P49951	P49951	MULTI-MSMS	20140904-PurClathDigest-1ug-03	3	581.95	3	581.952998	1742.83716	27394.93	-4.0275	-0.0023438	-0.36271	-0.00021108	-4.3902	-0.0025549	581.953441625369	47.062	0.73817	47.062	46.811	47.549	0					148	22	8	0	0	0	1.879E-05	3	6046	128.35
AHMGMFTELAILYSK	15	2 Oxidation (M)	_AHM(ox)GM(ox)FTELAILYSK_		AHM(1)GM(1)FTELAILYSK		AHM(106.58)GM(106.58)FTELAILYSK	0	0	2	0	P49951;F1MPU0	P49951	P49951	MULTI-MSMS	20140904-PurClathDigest-1ug-03	3	582.28	3	581.952998	1742.83716	27637.12	-3.2305	-0.00188	-0.20191	-0.0001175	-3.4324	-0.0019975	581.953154835285	48.149	3.6247	48.149	47.452	51.076	0					312	108	7	0	0	0	0.00018397	6	6382	106.58
AHMGMFTELAILYSK	15	2 Oxidation (M)	_AHM(ox)GM(ox)FTELAILYSK_		AHM(1)GM(1)FTELAILYSK		AHM(85.16)GM(85.16)FTELAILYSK	0	0	2	0	P49951;F1MPU0	P49951	P49951	MULTI-MSMS	20140904-PurClathDigest-1ug-03	3	872.42	2	872.425858	1742.83716	23018.38	-2.7507	-0.0023998	0.84584	0.00073794	-1.9049	-0.0016619	872.927794704463	61.509	1.1907	61.509	61.216	62.406	0					54	20	3	0	0	0	0.0035134	1	8894	85.163
AHMGMFTELAILYSK	15	2 Oxidation (M)	_AHM(ox)GM(ox)FTELAILYSK_		AHM(1)GM(1)FTELAILYSK		AHM(130.47)GM(130.47)FTELAILYSK	0	0	2	0	P49951;F1MPU0	P49951	P49951	MSMS	20140904-PurClathDigest-1ug-03	3	872.42	2	872.425858	1742.83716	NaN	NaN	NaN	NaN	NaN	NaN	NaN	NaN	46.894	1	46.894	46.394	47.394	0								0	0	0	1.5181E-07	1	6048	130.47
AHMGMFTELAILYSK	15	2 Oxidation (M)	_AHM(ox)GM(ox)FTELAILYSK_		AHM(1)GM(1)FTELAILYSK		AHM(139.66)GM(139.66)FTELAILYSK	0	0	2	0	P49951;F1MPU0	P49951	P49951	MSMS	20140904-PurClathDigest-1ug-03	3	872.42	2	872.425858	1742.83716	NaN	NaN	NaN	NaN	NaN	NaN	NaN	NaN	47.15	1	47.15	46.65	47.65	-3.8147E-06								0	0	0	2.2276E-11	1	6112	139.66
AHMGMFTELAILYSK	15	2 Oxidation (M)	_AHM(ox)GM(ox)FTELAILYSK_		AHM(1)GM(1)FTELAILYSK		AHM(125.36)GM(125.36)FTELAILYSK	0	0	2	0	P49951;F1MPU0	P49951	P49951	MSMS	20140904-PurClathDigest-1ug-03	3	872.42	2	872.425858	1742.83716	NaN	NaN	NaN	NaN	NaN	NaN	NaN	NaN	47.41	1	47.41	46.91	47.91	0								0	0	0	3.0563E-07	1	6176	125.36
AHMGMFTELAILYSK	15	2 Oxidation (M)	_AHM(ox)GM(ox)FTELAILYSK_		AHM(1)GM(1)FTELAILYSK		AHM(134.02)GM(134.02)FTELAILYSK	0	0	2	0	P49951;F1MPU0	P49951	P49951	MSMS	20140904-PurClathDigest-1ug-03	3	872.42	2	872.425858	1742.83716	NaN	NaN	NaN	NaN	NaN	NaN	NaN	NaN	47.68	1	47.68	47.18	48.18	-3.8147E-06								0	0	0	4.4837E-08	1	6241	134.02
AHMGMFTELAILYSK	15	2 Oxidation (M)	_AHM(ox)GM(ox)FTELAILYSK_		AHM(1)GM(1)FTELAILYSK		AHM(130.47)GM(130.47)FTELAILYSK	0	0	2	0	P49951;F1MPU0	P49951	P49951	MSMS	20140904-PurClathDigest-1ug-03	3	872.42	2	872.425858	1742.83716	NaN	NaN	NaN	NaN	NaN	NaN	NaN	NaN	47.966	1	47.966	47.466	48.466	0								0	0	0	1.5181E-07	1	6308	130.47
AHMGMFTELAILYSK	15	2 Oxidation (M)	_AHM(ox)GM(ox)FTELAILYSK_		AHM(1)GM(1)FTELAILYSK		AHM(143.46)GM(143.46)FTELAILYSK	0	0	2	0	P49951;F1MPU0	P49951	P49951	MSMS	20140904-PurClathDigest-1ug-03	3	872.42	2	872.425858	1742.83716	NaN	NaN	NaN	NaN	NaN	NaN	NaN	NaN	48.354	1	48.354	47.854	48.854	0								0	0	0	3.171E-11	1	6404	143.46
AHMGMFTELAILYSK	15	2 Oxidation (M)	_AHM(ox)GM(ox)FTELAILYSK_		AHM(1)GM(1)FTELAILYSK		AHM(59.86)GM(59.86)FTELAILYSK	0	0	2	0	P49951;F1MPU0	P49951	P49951	MSMS	20140904-PurClathDigest-1ug-03	3	581.95	3	581.952998	1742.83716	NaN	NaN	NaN	NaN	NaN	NaN	NaN	NaN	49.112	1	49.112	48.612	49.612	0								0	0	0	0.034934	1	6582	59.864
AHMGMFTELAILYSK	15	2 Oxidation (M)	_AHM(ox)GM(ox)FTELAILYSK_		AHM(1)GM(1)FTELAILYSK		AHM(85.84)GM(85.84)FTELAILYSK	0	0	2	0	P49951;F1MPU0	P49951	P49951	MSMS	20140904-PurClathDigest-1ug-03	3	581.95	3	581.952998	1742.83716	NaN	NaN	NaN	NaN	NaN	NaN	NaN	NaN	49.474	1	49.474	48.974	49.974	0								0	0	0	0.00042327	1	6670	85.837
AHMGMFTELAILYSK	15	Oxidation (M)	_AHMGM(ox)FTELAILYSK_		AHM(0.132)GM(0.868)FTELAILYSK		AHM(-8.17)GM(8.17)FTELAILYSK	0	0	1	0	P49951;F1MPU0	P49951	P49951	MULTI-MSMS	20140904-PurClathDigest-1ug-01	1	576.62	3	576.621359	1726.84225	27914	-2.6833	-0.0015472	-0.31061	-0.0001791	-2.9939	-0.0017264	576.621355517775	49.048	0.61008	49.048	48.847	49.457	0					61	19	5	0	0	0	0.0049885	1	7444	73.386
AHMGMFTELAILYSK	15	Oxidation (M)	_AHMGM(ox)FTELAILYSK_		AHM(0.116)GM(0.884)FTELAILYSK		AHM(-8.82)GM(8.82)FTELAILYSK	0	0	1	0	P49951;F1MPU0	P49951	P49951	MULTI-MSMS	20140904-PurClathDigest-1ug-01	1	864.43	2	864.428401	1726.84225	22859.62	-2.2022	-0.0019036	0.26435	0.00022852	-1.9378	-0.0016751	864.930152896784	49.029	0.48675	49.029	48.818	49.304	0					46	15	5	0	0	0	0.00043016	1	7445	117.48
AHMGMFTELAILYSK	15	Oxidation (M)	_AHM(ox)GMFTELAILYSK_		AHM(0.996)GM(0.004)FTELAILYSK		AHM(23.97)GM(-23.97)FTELAILYSK	0	0	1	0	P49951;F1MPU0	P49951	P49951	MULTI-MSMS	20140904-PurClathDigest-1ug-01	1	864.43	2	864.428401	1726.84225	22647.31	-2.8004	-0.0024207	-0.013983	-1.2087E-05	-2.8143	-0.0024328	864.929957916516	50.441	0.84425	50.441	50.151	50.995	0					90	26	5	0	0	0	6.7584E-05	2	7834	125.73
AHMGMFTELAILYSK	15	Oxidation (M)	_AHM(ox)GMFTELAILYSK_		AHM(0.985)GM(0.015)FTELAILYSK		AHM(18.11)GM(-18.11)FTELAILYSK	0	0	1	0	P49951;F1MPU0	P49951	P49951	MULTI-MSMS	20140904-PurClathDigest-1ug-01	1	576.62	3	576.621359	1726.84225	27484.33	-3.2888	-0.0018964	0.86818	0.00050061	-2.4206	-0.0013958	576.622137802155	50.448	0.88034	50.448	50.182	51.062	0					106	27	6	0	0	0	0.00026203	1	7779	105.19
AHMGMFTELAILYSK	15	Oxidation (M)	_AHMGM(ox)FTELAILYSK_		AHM(0.353)GM(0.647)FTELAILYSK		AHM(-2.63)GM(2.63)FTELAILYSK	0	0	1	0	P49951;F1MPU0	P49951	P49951	MULTI-MSMS	20140904-PurClathDigest-1ug-02	2	576.95	3	576.621359	1726.84225	27858.64	-3.0061	-0.0017334	-0.70509	-0.00040657	-3.7112	-0.0021399	576.955461462164	49.299	0.53208	49.299	49.087	49.619	0					51	14	5	0	0	0	0.023108	1	6892	54.402
AHMGMFTELAILYSK	15	Oxidation (M)	_AHMGM(ox)FTELAILYSK_		AHM(0.03)GM(0.97)FTELAILYSK		AHM(-15.09)GM(15.09)FTELAILYSK	0	0	1	0	P49951;F1MPU0	P49951	P49951	MULTI-MSMS	20140904-PurClathDigest-1ug-02	2	864.43	2	864.428401	1726.84225	22921.66	-3.1191	-0.0026963	0.52134	0.00045066	-2.5978	-0.0022456	864.428467211832	49.305	0.56409	49.305	49.055	49.619	0					44	15	4	0	0	0	1.4181E-07	1	6902	151.22
AHMGMFTELAILYSK	15	Oxidation (M)	_AHM(ox)GMFTELAILYSK_		AHM(0.997)GM(0.003)FTELAILYSK		AHM(25.58)GM(-25.58)FTELAILYSK	0	0	1	0	P49951;F1MPU0	P49951	P49951	MULTI-MSMS	20140904-PurClathDigest-1ug-02	2	864.43	2	864.428401	1726.84225	22456.27	-2.7256	-0.0023561	-0.093961	-8.1222E-05	-2.8195	-0.0024373	864.429059056485	50.75	0.61475	50.75	50.502	51.117	0					61	18	5	0	0	0	0.00011327	1	7230	130.72
AHMGMFTELAILYSK	15	Oxidation (M)	_AHM(ox)GMFTELAILYSK_		AHM(0.989)GM(0.011)FTELAILYSK		AHM(19.38)GM(-19.38)FTELAILYSK	0	0	1	0	P49951;F1MPU0	P49951	P49951	MULTI-MSMS	20140904-PurClathDigest-1ug-02	2	576.95	3	576.621359	1726.84225	27855.93	-2.6082	-0.0015039	0.29137	0.00016801	-2.3168	-0.0013359	576.621807840253	50.762	0.58	50.762	50.537	51.117	0					68	17	6	0	0	0	0.00024214	1	7232	106.32
AHMGMFTELAILYSK	15	Oxidation (M)	_AHMGM(ox)FTELAILYSK_		AHM(0.135)GM(0.865)FTELAILYSK		AHM(-8.08)GM(8.08)FTELAILYSK	0	0	1	0	P49951;F1MPU0	P49951	P49951	MULTI-MSMS	20140904-PurClathDigest-1ug-03	3	576.95	3	576.621359	1726.84225	27612.96	-2.8873	-0.0016649	-0.77854	-0.00044892	-3.6658	-0.0021138	576.955455797172	49.558	0.65533	49.558	49.326	49.981	0					63	18	5	0	0	0	0.0052561	1	6673	72.321
AHMGMFTELAILYSK	15	Oxidation (M)	_AHMGM(ox)FTELAILYSK_		AHM(0.019)GM(0.981)FTELAILYSK		AHM(-17.07)GM(17.07)FTELAILYSK	0	0	1	0	P49951;F1MPU0	P49951	P49951	MULTI-MSMS	20140904-PurClathDigest-1ug-03	3	864.43	2	864.428401	1726.84225	23135.39	-2.8429	-0.0024574	0.43447	0.00037557	-2.4084	-0.0020819	864.42796182758	49.541	0.74658	49.541	49.167	49.913	0					52	21	5	0	0	0	1.6274E-07	1	6685	158.93
AHMGMFTELAILYSK	15	Oxidation (M)	_AHM(ox)GMFTELAILYSK_		AHM(0.987)GM(0.013)FTELAILYSK		AHM(18.72)GM(-18.72)FTELAILYSK	0	0	1	0	P49951;F1MPU0	P49951	P49951	MULTI-MSMS	20140904-PurClathDigest-1ug-03	3	576.62	3	576.621359	1726.84225	27743.34	-3.5766	-0.0020623	1.5143	0.00087319	-2.0623	-0.0011892	576.622447846805	50.934	0.74892	50.934	50.691	51.44	0					77	22	5	0	0	0	9.4877E-05	1	6997	114.7
AHMGMFTELAILYSK	15	Oxidation (M)	_AHM(ox)GMFTELAILYSK_		AHM(0.999)GM(0.001)FTELAILYSK		AHM(31.74)GM(-31.74)FTELAILYSK	0	0	1	0	P49951;F1MPU0	P49951	P49951	MULTI-MSMS	20140904-PurClathDigest-1ug-03	3	864.43	2	864.428401	1726.84225	22547.79	-3.4481	-0.0029806	0.94931	0.00082061	-2.4988	-0.00216	864.430268092158	50.928	0.8175	50.928	50.589	51.407	0					76	24	5	0	0	0	9.3689E-05	1	7009	134.37
AHTMTDDVTFWK	12	Oxidation (M)	_AHTM(ox)TDDVTFWK_		AHTM(1)TDDVTFWK		AHTM(196.15)TDDVTFWK	0	0	1	0	P49951;F1MPU0	P49951	P49951	MULTI-MSMS	20140904-PurClathDigest-1ug-01	1	734.33	2	734.332284	1466.65001	24515.95	-4.9688	-0.0036487	-1.611	-0.001183	-6.5797	-0.0048317	734.331985619676	41.641	2.2801	41.641	41.24	43.52	0					283	75	7	0	0	0	8.0824E-07	4	5426	196.15
AHTMTDDVTFWK	12	Oxidation (M)	_AHTM(ox)TDDVTFWK_		AHTM(1)TDDVTFWK		AHTM(43.6)TDDVTFWK	0	0	1	0	P49951;F1MPU0	P49951	P49951	MULTI-MSMS	20140904-PurClathDigest-1ug-01	1	489.89	3	489.890615	1466.65001	29720.77	-4.9842	-0.0024417	-0.80044	-0.00039213	-5.7847	-0.0028338	489.89051024857	41.621	1.2105	41.621	41.36	42.57	0					180	39	7	0	0	0	0.053344	1	5440	43.604
AHTMTDDVTFWK	12	Oxidation (M)	_AHTM(ox)TDDVTFWK_		AHTM(1)TDDVTFWK		AHTM(50.35)TDDVTFWK	0	0	1	0	P49951;F1MPU0	P49951	P49951	MULTI-SECPEP	20140904-PurClathDigest-1ug-01	1	734.03	2	734.332284	1466.65001	24585.71	-3.0476	-0.002238	0.78154	0.00057391	-2.2661	-0.0016641	734.332549283252	61.468	1.1782	61.468	61.174	62.352	0					53	22	3	0	0	0	0.030041	1	10030	50.354
AHTMTDDVTFWK	12	Oxidation (M)	_AHTM(ox)TDDVTFWK_		AHTM(1)TDDVTFWK		AHTM(167.83)TDDVTFWK	0	0	1	0	P49951;F1MPU0	P49951	P49951	MULTI-MSMS	20140904-PurClathDigest-1ug-02	2	734.33	2	734.332284	1466.65001	24569.34	-4.9495	-0.0036346	-1.1563	-0.00084913	-6.1058	-0.0044837	734.332278309951	42.013	2.8316	42.013	41.632	44.464	0					293	88	7	0	0	0	4.3565E-06	5	5010	167.83
AHTMTDDVTFWK	12	Oxidation (M)	_AHTM(ox)TDDVTFWK_		AHTM(1)TDDVTFWK		AHTM(183.37)TDDVTFWK	0	0	1	0	P49951;F1MPU0	P49951	P49951	MULTI-MSMS	20140904-PurClathDigest-1ug-03	3	734.33	2	734.332284	1466.65001	24437.54	-6.1359	-0.0045058	-0.68999	-0.00050668	-6.8259	-0.0050125	734.332650489751	42.017	3.0115	42.017	41.57	44.581	0					309	91	7	0	0	0	1.6812E-06	6	4776	183.37
AHTMTDDVTFWK	12	Oxidation (M)	_AHTM(ox)TDDVTFWK_		AHTM(1)TDDVTFWK		AHTM(51.29)TDDVTFWK	0	0	1	0	P49951;F1MPU0	P49951	P49951	MULTI-MSMS	20140904-PurClathDigest-1ug-03	3	489.89	3	489.890615	1466.65001	29775.69	-6.102	-0.0029893	-0.04753	-2.3285E-05	-6.1495	-0.0030126	489.89088100876	41.999	1.4247	41.999	41.633	43.057	0					175	42	7	0	0	0	0.036779	2	4792	51.286
AHTMTDDVTFWK	12	Unmodified	_AHTMTDDVTFWK_					0	0	0	0	P49951;F1MPU0	P49951	P49951	MULTI-MSMS	20140904-PurClathDigest-1ug-01	1	726.33	2	726.334827	1450.6551	24828.21	-3.9552	-0.0028728	-0.99408	-0.00072204	-4.9493	-0.0035949	726.334338837446	44.316	0.26925	44.316	44.174	44.444	0					30	8	5	0	0	0	0.00024246	1	6201	112.5
AHTMTDDVTFWK	12	Unmodified	_AHTMTDDVTFWK_					0	0	0	0	P49951;F1MPU0	P49951	P49951	MULTI-MSMS	20140904-PurClathDigest-1ug-02	2	726.33	2	726.334827	1450.6551	24995.5	-4.4163	-0.0032077	-0.94652	-0.00068749	-5.3628	-0.0038952	726.334406092576	44.848	0.32417	44.848	44.689	45.013	0					33	9	5	0	0	0	0.00023578	1	5787	95.273
AHTMTDDVTFWK	12	Unmodified	_AHTMTDDVTFWK_					0	0	0	0	P49951;F1MPU0	P49951	P49951	MULTI-MSMS	20140904-PurClathDigest-1ug-03	3	726.33	2	726.334827	1450.6551	24999.29	-4.5829	-0.0033287	-0.93931	-0.00068225	-5.5222	-0.004011	726.334200556739	44.934	0.287	44.934	44.772	45.059	0					15	8	2	0	0	0	2.8159E-05	1	5553	136.27
AIGNIELGIR	10	Unmodified	_AIGNIELGIR_					0	0	0	0	F1N1S2	F1N1S2	F1N1S2	MULTI-MSMS	20140904-PurClathDigest-1ug-01	1	528.31	2	528.314023	1054.61349	28281.16	-4.3424	-0.0022942	-0.32825	-0.00017342	-4.6707	-0.0024676	528.313822392023	44.752	0.50917	44.752	44.566	45.076	3.8147E-06					39	16	4	0	0	0	0.00025512	1	6298	137.95
AIGNIELGIR	10	Unmodified	_AIGNIELGIR_					0	0	0	0	F1N1S2	F1N1S2	F1N1S2	MULTI-MSMS	20140904-PurClathDigest-1ug-02	2	528.31	2	528.314023	1054.61349	28379.15	-4.2704	-0.0022561	0.59363	0.00031362	-3.6767	-0.0019425	528.314257116325	45.232	0.63192	45.232	45.045	45.677	0					39	19	4	0	0	0	0.0001321	1	5862	154.85
AIGNIELGIR	10	Unmodified	_AIGNIELGIR_					0	0	0	0	F1N1S2	F1N1S2	F1N1S2	MULTI-MSMS	20140904-PurClathDigest-1ug-03	3	528.31	2	528.314023	1054.61349	28392.4	-4.4155	-0.0023328	0.29793	0.0001574	-4.1176	-0.0021754	528.314191752891	45.297	0.50767	45.297	45.121	45.629	0					33	15	3	0	0	0	0.00011297	1	5630	159.79
AIIDGVER	8	Unmodified	_AIIDGVER_					0	0	0	0	F1MGK5	F1MGK5	F1MGK5	MULTI-MSMS	20140904-PurClathDigest-1ug-01	1	436.74	2	436.745442	871.476331	31944.18	-5.9165	-0.002584	-0.069188	-3.0217E-05	-5.9857	-0.0026142	436.745925813748	37.585	0.333	37.585	37.436	37.769	-3.8147E-06					16	10	3	0	0	0	0.0010929	1	4410	128.61
AIKELDEWYAR	11	Unmodified	_AIKELDEWYAR_					0	0	0	1	P04973	P04973	P04973	MULTI-MSMS	20140904-PurClathDigest-1ug-01	1	465.24	3	465.241865	1392.70376	31577.77	-5.1528	-0.0023973	1.0254	0.00047707	-4.1273	-0.0019202	465.24229904243	43.31	0.29642	43.31	43.194	43.49	0					28	9	4	0	0	0	0.0037553	1	5922	102.4
AIKELDEWYAR	11	Unmodified	_AIKELDEWYAR_					0	0	0	1	P04973	P04973	P04973	MULTI-MSMS	20140904-PurClathDigest-1ug-01	1	697.36	2	697.359159	1392.70376	25312.24	-4.8694	-0.0033957	-0.34715	-0.00024208	-5.2166	-0.0036378	697.35897623198	43.315	0.32692	43.315	43.194	43.52	0					28	10	4	0	0	0	7.7521E-05	1	5923	136.02
AIKELDEWYAR	11	Unmodified	_AIKELDEWYAR_					0	0	0	1	P04973	P04973	P04973	MULTI-MSMS	20140904-PurClathDigest-1ug-02	2	697.36	2	697.359159	1392.70376	25314.52	-4.7229	-0.0032935	-1.5477	-0.0010793	-6.2706	-0.0043728	697.358343957012	43.828	0.69784	43.828	43.42	44.118	0					47	21	4	0	0	0	2.7032E-05	1	5517	169.52
AIKELDEWYAR	11	Unmodified	_AIKELDEWYAR_					0	0	0	1	P04973	P04973	P04973	MULTI-MSMS	20140904-PurClathDigest-1ug-02	2	465.24	3	465.241865	1392.70376	31195.17	-4.8892	-0.0022747	-0.49161	-0.00022872	-5.3808	-0.0025034	465.241569844671	43.818	0.41467	43.818	43.608	44.022	0					31	12	3	0	0	0	0.00045142	1	5536	129.82
AIKELDEWYAR	11	Unmodified	_AIKELDEWYAR_					0	0	0	1	P04973	P04973	P04973	MULTI-MSMS	20140904-PurClathDigest-1ug-03	3	697.35	2	697.359159	1392.70376	25327.17	-5.2368	-0.003652	-1.2892	-0.00089903	-6.526	-0.004551	697.358379935256	43.944	0.87708	43.944	43.451	44.328	0					46	26	3	0	0	0	2.1142E-06	1	5294	157.68
AIQFYLEFK	9	Unmodified	_AIQFYLEFK_					0	0	0	0	P49951;F1MPU0	P49951	P49951	MULTI-MSMS	20140904-PurClathDigest-1ug-01	1	580.31	2	579.813325	1157.6121	27387.15	-3.0148	-0.001748	0.053904	3.1254E-05	-2.9609	-0.0017168	579.813353467619	50.723	0.4385	50.723	50.523	50.962	3.8147E-06					40	13	4	0	0	0	0.0091866	1	7900	93.178
AKVDFILLK	9	Unmodified	_AKVDFILLK_					0	0	0	1	E1BKN2	E1BKN2	E1BKN2	MULTI-MSMS	20140904-PurClathDigest-1ug-01	1	523.83	2	523.83406	1045.65357	29066.57	-4.2686	-0.002236	0.22972	0.00012033	-4.0389	-0.0021157	523.834068482248	44.9	0.447	44.9	44.716	45.163	0					39	14	4	0	0	0	0.0057142	1	6334	113.93
AKVDFILLK	9	Unmodified	_AKVDFILLK_					0	0	0	1	E1BKN2	E1BKN2	E1BKN2	MULTI-MSMS	20140904-PurClathDigest-1ug-02	2	523.83	2	523.83406	1045.65357	28937.82	-3.3102	-0.001734	-0.018423	-9.6505E-06	-3.3286	-0.0017436	523.834043139753	45.494	0.46642	45.494	45.301	45.768	0					41	14	4	0	0	0	0.049073	1	5931	79.201
AKVDFILLK	9	Unmodified	_AKVDFILLK_					0	0	0	1	E1BKN2	E1BKN2	E1BKN2	MULTI-MSMS	20140904-PurClathDigest-1ug-03	3	523.83	2	523.83406	1045.65357	29200.85	-3.5984	-0.0018849	0.24623	0.00012899	-3.3521	-0.001756	523.8340977577	45.555	0.40183	45.555	45.381	45.783	0					34	12	4	0	0	0	0.046977	1	5708	80.037
ALAAELNQLR	10	Unmodified	_ALAAELNQLR_					0	0	0	0	Q28115	Q28115	Q28115	MULTI-MSMS	20140904-PurClathDigest-1ug-01	1	549.82	2	549.81693	1097.61931	28639.45	-4.8938	-0.0026907	0.35543	0.00019542	-4.5383	-0.0024953	549.81718503507	43.295	0.82925	43.295	43.106	43.935	0					57	27	5	0	0	0	4.8383E-05	1	5906	175.91
ALAAELNQLR	10	Unmodified	_ALAAELNQLR_					0	0	0	0	Q28115	Q28115	Q28115	MULTI-MSMS	20140904-PurClathDigest-1ug-02	2	549.82	2	549.81693	1097.61931	28182.88	-4.6331	-0.0025473	0.2636	0.00014493	-4.3695	-0.0024024	549.817156167732	43.675	0.82717	43.675	43.482	44.309	-3.8147E-06					52	25	5	0	0	0	8.0597E-05	1	5478	174.02
ALAAELNQLR	10	Unmodified	_ALAAELNQLR_					0	0	0	0	Q28115	Q28115	Q28115	MULTI-MSMS	20140904-PurClathDigest-1ug-03	3	549.82	2	549.81693	1097.61931	28028.58	-4.7273	-0.0025992	0.59951	0.00032962	-4.1278	-0.0022695	549.817335839378	43.787	0.77783	43.787	43.581	44.358	0					52	23	5	0	0	0	5.2369E-05	1	5242	174.41
ALALAPGPPAR	11	Unmodified	_ALALAPGPPAR_					0	0	0	0	G3MYP5	G3MYP5	G3MYP5	MULTI-MSMS	20140904-PurClathDigest-1ug-01	1	517.31	2	517.311284	1032.60801	29448.17	-4.9364	-0.0025537	-0.29078	-0.00015043	-5.2272	-0.0027041	517.311131250581	39.44	0.57625	39.44	39.216	39.792	0					55	18	5	0	0	0	0.0033672	1	4880	111.61
ALALAPGPPAR	11	Unmodified	_ALALAPGPPAR_					0	0	0	0	G3MYP5	G3MYP5	G3MYP5	MULTI-MSMS	20140904-PurClathDigest-1ug-02	2	517.31	2	517.311284	1032.60801	29564.41	-4.553	-0.0023553	0.23156	0.00011979	-4.3214	-0.0022355	517.31138837431	39.806	0.72792	39.806	39.518	40.246	-3.8147E-06					57	21	4	0	0	0	0.0039663	1	4511	109.66
ALALAPGPPAR	11	Unmodified	_ALALAPGPPAR_					0	0	0	0	G3MYP5	G3MYP5	G3MYP5	MULTI-MSMS	20140904-PurClathDigest-1ug-03	3	517.31	2	517.311284	1032.60801	29479.07	-4.7013	-0.002432	0.46719	0.00024168	-4.2341	-0.0021904	517.311532142441	39.845	0.67983	39.845	39.582	40.262	0					52	19	4	0	0	0	0.0039663	1	4292	109.66
ALEAELAALR	10	Unmodified	_ALEAELAALR_					0	0	0	0	Q08DH7	Q08DH7	Q08DH7	MULTI-MSMS	20140904-PurClathDigest-1ug-02	2	528.8	2	528.806031	1055.59751	28890.32	-4.8683	-0.0025744	0.92945	0.0004915	-3.9389	-0.0020829	528.806548510791	46.567	0.74483	46.567	46.35	47.095	0					63	23	5	0	0	0	2.2241E-05	1	6195	179.09
ALEAELAALR	10	Unmodified	_ALEAELAALR_					0	0	0	0	Q08DH7	Q08DH7	Q08DH7	MULTI-MSMS	20140904-PurClathDigest-1ug-03	3	528.8	2	528.806031	1055.59751	28943.47	-4.0465	-0.0021398	0.14797	7.8246E-05	-3.8986	-0.0020616	528.806101740069	46.472	0.68592	46.472	46.279	46.965	0					60	21	6	0	0	0	0.00014607	1	5920	151.22
ALEESNYELEGK	12	Unmodified	_ALEESNYELEGK_					0	0	0	0	CON__P13645;CON__P02535-1	CON__P13645	CON__P13645	MULTI-MSMS	20140904-PurClathDigest-1ug-01	1	691.32	2	691.327721	1380.64089	25130.64	-5.7386	-0.0039673	0.50684	0.0003504	-5.2318	-0.0036169	691.326983646822	38.898	0.97442	38.898	38.696	39.671	3.8147E-06					83	31	4	0	0	0	0.0017973	1	4737	106.26
ALEESNYELEGK	12	Unmodified	_ALEESNYELEGK_					0	0	0	0	CON__P13645;CON__P02535-1	CON__P13645	CON__P13645	MULTI-MSMS	20140904-PurClathDigest-1ug-02	2	691.32	2	691.327721	1380.64089	25375.95	-5.0159	-0.0034676	1.091	0.00075426	-3.9249	-0.0027134	691.32749528874	39.217	1.0492	39.217	38.994	40.043	3.8147E-06					82	31	4	0	0	0	0.00015441	1	4354	123.95
ALEESNYELEGK	12	Unmodified	_ALEESNYELEGK_					0	0	0	0	CON__P13645;CON__P02535-1	CON__P13645	CON__P13645	MULTI-MSMS	20140904-PurClathDigest-1ug-03	3	691.32	2	691.327721	1380.64089	25429.05	-5.2799	-0.0036501	1.9228	0.0013293	-3.3571	-0.0023208	691.327742495902	39.318	0.43533	39.318	39.11	39.545	0					69	12	7	0	0	0	0.00012533	1	4168	127.17
ALEGEEEEETANVQMSEK	18	Oxidation (M)	_ALEGEEEEETANVQM(ox)SEK_		ALEGEEEEETANVQM(1)SEK		ALEGEEEEETANVQM(72.36)SEK	0	0	1	0	F1N3M8;G3MYP5	F1N3M8;G3MYP5	G3MYP5	MULTI-MSMS	20140904-PurClathDigest-1ug-01	1	1019.94	2	1019.94151	2037.86846	20968.48	-5.3902	-0.0054977	-0.28123	-0.00028684	-5.6715	-0.0057846	1019.94166604211	37.178	0.8235	37.178	36.945	37.769	0					124	26	7	0	0	0	0.049635	1	4288	72.359
ALEHFTDLYDIK	12	Unmodified	_ALEHFTDLYDIK_					0	0	0	0	P49951;F1MPU0	P49951	P49951	MULTI-MSMS	20140904-PurClathDigest-1ug-01	1	732.87	2	732.872099	1463.72965	24555.47	-3.6441	-0.0026706	-0.31604	-0.00023161	-3.9601	-0.0029022	732.872231441989	45.427	1.6235	45.427	45.163	46.787	0					165	53	7	0	0	0	6.2572E-05	2	6449	142.12
ALEHFTDLYDIK	12	Unmodified	_ALEHFTDLYDIK_					0	0	0	0	P49951;F1MPU0	P49951	P49951	MULTI-MSMS	20140904-PurClathDigest-1ug-01	1	488.92	3	488.917158	1463.72965	29800.79	-3.7534	-0.0018351	-0.088926	-4.3478E-05	-3.8423	-0.0018786	488.917389551826	45.435	1.7118	45.435	45.134	46.846	0					205	56	7	0	0	0	0.00215	4	6450	87.719
ALEHFTDLYDIK	12	Unmodified	_ALEHFTDLYDIK_					0	0	0	0	P49951;F1MPU0	P49951	P49951	MULTI-MSMS	20140904-PurClathDigest-1ug-02	2	732.87	2	732.872099	1463.72965	24572.39	-2.6281	-0.0019261	-0.98321	-0.00072057	-3.6113	-0.0026466	732.871748059893	45.958	1.8303	45.958	45.707	47.538	3.8147E-06					140	58	7	0	0	0	1.21E-06	2	6030	163.51
ALEHFTDLYDIK	12	Unmodified	_ALEHFTDLYDIK_					0	0	0	0	P49951;F1MPU0	P49951	P49951	MULTI-MSMS	20140904-PurClathDigest-1ug-02	2	488.92	3	488.917158	1463.72965	29828.21	-2.7605	-0.0013497	-0.78479	-0.0003837	-3.5453	-0.0017334	488.917031519535	45.97	1.5124	45.97	45.707	47.22	0					162	48	6	0	0	0	0.0022135	2	6098	86.996
ALEHFTDLYDIK	12	Unmodified	_ALEHFTDLYDIK_					0	0	0	0	P49951;F1MPU0	P49951	P49951	MULTI-MSMS	20140904-PurClathDigest-1ug-03	3	732.87	2	732.872099	1463.72965	24443.11	-3.1197	-0.0022863	-1.1676	-0.00085569	-4.2873	-0.003142	732.871578517862	45.911	1.854	45.911	45.661	47.515	0					145	58	6	0	0	0	1.9878E-06	2	5760	155.61
ALEHFTDLYDIK	12	Unmodified	_ALEHFTDLYDIK_					0	0	0	0	P49951;F1MPU0	P49951	P49951	MULTI-MSMS	20140904-PurClathDigest-1ug-03	3	488.92	3	488.917158	1463.72965	29620.29	-3.0548	-0.0014935	-1.1609	-0.00056757	-4.2157	-0.0020611	488.916860099599	45.913	1.303	45.913	45.694	46.997	0					160	41	7	0	0	0	0.0008119	2	5763	102.97
ALEHFTDLYDIKR	13	Unmodified	_ALEHFTDLYDIKR_					0	0	0	1	P49951;F1MPU0	P49951	P49951	MULTI-MSMS	20140904-PurClathDigest-1ug-01	1	540.95	3	540.950862	1619.83076	28658.25	-5.3821	-0.0029115	-0.99421	-0.00053782	-6.3763	-0.0034493	540.950755058411	43.021	2.0591	43.021	42.749	44.808	0					251	68	7	0	0	0	5.7367E-08	2	5856	182.23
ALEHFTDLYDIKR	13	Unmodified	_ALEHFTDLYDIKR_					0	0	0	1	P49951;F1MPU0	P49951	P49951	MULTI-MSMS	20140904-PurClathDigest-1ug-01	1	405.96	4	405.964966	1619.83076	33281.12	-5.1551	-0.0020928	-0.54975	-0.00022318	-5.7049	-0.002316	405.964955259077	42.999	1.663	42.999	42.749	44.412	0					210	55	7	0	0	0	3.8178E-05	3	5858	112.02
ALEHFTDLYDIKR	13	Unmodified	_ALEHFTDLYDIKR_					0	0	0	1	P49951;F1MPU0	P49951	P49951	MULTI-MSMS	20140904-PurClathDigest-1ug-01	1	810.92	2	810.922655	1619.83076	23568.67	-4.9188	-0.0039888	-0.52554	-0.00042617	-5.4444	-0.004415	810.922410597625	42.995	1.2458	42.995	42.749	43.995	0					147	41	6	0	0	0	1.4651E-12	2	5795	237.41
ALEHFTDLYDIKR	13	Unmodified	_ALEHFTDLYDIKR_					0	0	0	1	P49951;F1MPU0	P49951	P49951	MULTI-MSMS	20140904-PurClathDigest-1ug-02	2	540.95	3	540.950862	1619.83076	28595.96	-5.6833	-0.0030744	-0.79427	-0.00042966	-6.4775	-0.003504	540.950864583989	43.349	1.8681	43.349	43.041	44.91	0					247	58	7	0	0	0	4.0767E-08	3	5410	187.78
ALEHFTDLYDIKR	13	Unmodified	_ALEHFTDLYDIKR_					0	0	0	1	P49951;F1MPU0	P49951	P49951	MULTI-MSMS	20140904-PurClathDigest-1ug-02	2	405.96	4	405.964966	1619.83076	32915.38	-5.4944	-0.0022305	-0.28859	-0.00011716	-5.783	-0.0023477	405.965034321306	43.312	1.6788	43.312	43.041	44.72	0					194	52	7	0	0	0	0.0040185	3	5418	79.089
ALEHFTDLYDIKR	13	Unmodified	_ALEHFTDLYDIKR_					0	0	0	1	P49951;F1MPU0	P49951	P49951	MULTI-MSMS	20140904-PurClathDigest-1ug-02	2	810.92	2	810.922655	1619.83076	23636.2	-5.4532	-0.0044222	-0.095855	-7.7731E-05	-5.5491	-0.0044999	810.922769606009	43.312	1.2051	43.312	43.072	44.277	0					140	37	7	0	0	0	2.132E-12	2	5355	241.51
ALEHFTDLYDIKR	13	Unmodified	_ALEHFTDLYDIKR_					0	0	0	1	P49951;F1MPU0	P49951	P49951	MULTI-MSMS	20140904-PurClathDigest-1ug-03	3	540.95	3	540.950862	1619.83076	28644.95	-5.7161	-0.0030921	-0.82757	-0.00044767	-6.5437	-0.0035398	540.950845481533	43.491	2.4718	43.491	43.157	45.629	-3.8147E-06					238	76	7	0	0	0	2.9399E-10	2	5144	216.68
ALEHFTDLYDIKR	13	Unmodified	_ALEHFTDLYDIKR_					0	0	0	1	P49951;F1MPU0	P49951	P49951	MULTI-MSMS	20140904-PurClathDigest-1ug-03	3	405.96	4	405.964966	1619.83076	33183.29	-5.4602	-0.0022167	-0.25137	-0.00010205	-5.7116	-0.0023187	405.965053003911	43.468	1.7692	43.468	43.223	44.992	3.8147E-06					159	54	7	0	0	0	0.00080902	2	5146	97.957
ALEHFTDLYDIKR	13	Unmodified	_ALEHFTDLYDIKR_					0	0	0	1	P49951;F1MPU0	P49951	P49951	MULTI-MSMS	20140904-PurClathDigest-1ug-03	3	810.92	2	810.922655	1619.83076	23558.01	-5.4451	-0.0044155	-0.19454	-0.00015776	-5.6396	-0.0045733	810.922650938872	43.46	1.2305	43.46	43.223	44.453	0					133	37	7	0	0	0	1.2554E-25	2	5148	301.93
ALEQEDKVPEGK	12	Unmodified	_ALEQEDKVPEGK_					0	0	0	1	G3MYP5	G3MYP5	G3MYP5	MULTI-MSMS	20140904-PurClathDigest-1ug-01	1	448.23	3	448.233146	1341.67761	31631.84	-6.1599	-0.0027611	0.37012	0.0001659	-5.7897	-0.0025952	448.233267330296	33	0.34924	33	32.861	33.21	0					29	10	5	0	0	0	0.0035068	1	3234	101.53
ALEQEDKVPEGK	12	Unmodified	_ALEQEDKVPEGK_					0	0	0	1	G3MYP5	G3MYP5	G3MYP5	MULTI-MSMS	20140904-PurClathDigest-1ug-01	1	671.84	2	671.846081	1341.67761	25980.07	-6.4497	-0.0043332	0.99462	0.00066823	-5.4551	-0.003665	671.846466215585	33	0.35017	33	32.828	33.179	0					31	10	5	0	0	0	0.0015622	1	3235	129.17
ALEQEDKVPEGK	12	Unmodified	_ALEQEDKVPEGK_					0	0	0	1	G3MYP5	G3MYP5	G3MYP5	MULTI-MSMS	20140904-PurClathDigest-1ug-02	2	448.23	3	448.233146	1341.67761	31799.24	-5.5891	-0.0025052	0.75084	0.00033655	-4.8383	-0.0021687	448.233502098176	33.167	0.45934	33.167	32.992	33.451	0					30	11	5	0	0	0	0.0035068	1	2955	101.53
ALEQEDKVPEGK	12	Unmodified	_ALEQEDKVPEGK_					0	0	0	1	G3MYP5	G3MYP5	G3MYP5	MULTI-MSMS	20140904-PurClathDigest-1ug-02	2	671.84	2	671.846081	1341.67761	25912.8	-5.7644	-0.0038728	1.2721	0.00085463	-4.4924	-0.0030182	671.846682211845	33.164	0.42175	33.164	32.992	33.414	0					31	10	5	0	0	0	7.8289E-05	1	2957	140.82
ALEQEDKVPEGK	12	Unmodified	_ALEQEDKVPEGK_					0	0	0	1	G3MYP5	G3MYP5	G3MYP5	MULTI-MSMS	20140904-PurClathDigest-1ug-03	3	448.23	3	448.233146	1341.67761	31851.05	-5.572	-0.0024976	1.1379	0.00051006	-4.4341	-0.0019875	448.233629738904	33.258	0.47533	33.258	33.098	33.573	0					29	11	5	0	0	0	0.0038736	1	2808	107.65
ALEQEDKVPEGK	12	Unmodified	_ALEQEDKVPEGK_					0	0	0	1	G3MYP5	G3MYP5	G3MYP5	MULTI-MSMS	20140904-PurClathDigest-1ug-03	3	671.84	2	671.846081	1341.67761	25915.52	-5.5982	-0.0037611	1.2641	0.0008493	-4.334	-0.0029118	671.846539187344	33.256	0.43733	33.256	33.098	33.535	0					28	10	5	0	0	0	0.00010209	1	2810	131.35
ALEQEDKVPEGKDK	14	Unmodified	_ALEQEDKVPEGKDK_					0	0	0	2	G3MYP5	G3MYP5	G3MYP5	MULTI-MSMS	20140904-PurClathDigest-1ug-01	1	529.27	3	529.273782	1584.79952	28379.92	-7.592	-0.0040183	-0.29496	-0.00015612	-7.887	-0.0041744	529.273424943785	31.794	0.3175	31.794	31.652	31.97	1.9073E-06					37	9	5	0	0	0	0.00012976	1	2926	130.95
ALEQEDKVPEGKDK	14	Unmodified	_ALEQEDKVPEGKDK_					0	0	0	2	G3MYP5	G3MYP5	G3MYP5	MULTI-MSMS	20140904-PurClathDigest-1ug-01	1	793.4	2	793.407034	1584.79952	23625.11	-7.4503	-0.0059111	0.64802	0.00051414	-6.8022	-0.0053969	793.407684633039	31.798	0.3175	31.798	31.652	31.97	-1.9073E-06					31	9	5	0	0	0	0.00051239	1	2931	147.56
ALEQEDKVPEGKDK	14	Unmodified	_ALEQEDKVPEGKDK_					0	0	0	2	G3MYP5	G3MYP5	G3MYP5	MULTI-MSMS	20140904-PurClathDigest-1ug-02	2	529.27	3	529.273782	1584.79952	28767.61	-7.4378	-0.0039367	-0.11091	-5.8702E-05	-7.5487	-0.0039954	529.273515135125	31.801	0.34808	31.801	31.631	31.979	0					34	9	5	0	0	0	0.00054008	1	2644	122.12
ALEQEDKVPEGKDK	14	Unmodified	_ALEQEDKVPEGKDK_					0	0	0	2	G3MYP5	G3MYP5	G3MYP5	MULTI-MSMS	20140904-PurClathDigest-1ug-02	2	793.4	2	793.407034	1584.79952	24034.38	-7.3037	-0.0057948	0.8325	0.00066051	-6.4712	-0.0051343	793.407944362135	31.797	0.31334	31.797	31.666	31.979	0					25	8	4	0	0	0	0.00022043	1	2653	156.2
ALEQEDKVPEGKDK	14	Unmodified	_ALEQEDKVPEGKDK_					0	0	0	2	G3MYP5	G3MYP5	G3MYP5	MULTI-MSMS	20140904-PurClathDigest-1ug-03	3	529.27	3	529.273782	1584.79952	28614.95	-7.8177	-0.0041377	0.12008	6.3554E-05	-7.6977	-0.0040742	529.273709158746	31.874	0.41183	31.874	31.698	32.11	0					34	10	5	0	0	0	0.00023433	1	2506	125.5
ALEQEDKVPEGKDK	14	Unmodified	_ALEQEDKVPEGKDK_					0	0	0	2	G3MYP5	G3MYP5	G3MYP5	MULTI-MSMS	20140904-PurClathDigest-1ug-03	3	793.4	2	793.407034	1584.79952	24358.43	-7.5597	-0.0059979	0.91739	0.00072786	-6.6423	-0.00527	793.407885428326	31.874	0.33508	31.874	31.733	32.068	0					20	8	4	0	0	0	5.2681E-07	1	2517	181.26
ALEQKDEASEQDKAPEEK	18	Unmodified	_ALEQKDEASEQDKAPEEK_					0	0	0	2	F1N3M8;G3MYP5	F1N3M8;G3MYP5	G3MYP5	MULTI-MSMS	20140904-PurClathDigest-1ug-01	1	682.32	3	682.327162	2043.95966	25740.92	-6.1916	-0.0042247	1.1718	0.00079954	-5.0199	-0.0034252	682.328089939601	31.325	0.385	31.325	31.142	31.527	0					48	11	6	0	0	0	1.39E-13	1	2806	189.55
ALEQKDEASEQDKAPEEK	18	Unmodified	_ALEQKDEASEQDKAPEEK_					0	0	0	2	F1N3M8;G3MYP5	F1N3M8;G3MYP5	G3MYP5	MULTI-MSMS	20140904-PurClathDigest-1ug-02	2	682.66	3	682.327162	2043.95966	25468.4	-4.7204	-0.0032208	1.2265	0.00083691	-3.4938	-0.0023839	682.662305717214	31.281	0.36917	31.281	31.084	31.453	-1.9073E-06					41	9	7	0	0	0	3.0261E-13	1	2525	202.07
ALEQKDEASEQDKAPEEK	18	Unmodified	_ALEQKDEASEQDKAPEEK_					0	0	0	2	F1N3M8;G3MYP5	F1N3M8;G3MYP5	G3MYP5	MULTI-MSMS	20140904-PurClathDigest-1ug-02	2	512	4	511.997191	2043.95966	29215.26	-4.3781	-0.0022416	1.0033	0.0005137	-3.3748	-0.0017279	511.997705169139	31.277	0.29908	31.277	31.121	31.42	0					26	7	5	0	0	0	0.014098	1	2535	77.221
ALEQKDEASEQDKAPEEK	18	Unmodified	_ALEQKDEASEQDKAPEEK_					0	0	0	2	F1N3M8;G3MYP5	F1N3M8;G3MYP5	G3MYP5	MULTI-MSMS	20140904-PurClathDigest-1ug-03	3	682.33	3	682.327162	2043.95966	25298.99	-5.2476	-0.0035806	1.762	0.0012023	-3.4856	-0.0023783	682.662614441534	31.334	0.628	31.334	31.07	31.698	-1.9073E-06					47	15	5	0	0	0	7.9595E-14	1	2389	212.41
ALEQKDEASEQDKAPEEK	18	Unmodified	_ALEQKDEASEQDKAPEEK_					0	0	0	2	F1N3M8;G3MYP5	F1N3M8;G3MYP5	G3MYP5	MULTI-MSMS	20140904-PurClathDigest-1ug-03	3	512	4	511.997191	2043.95966	28879.98	-4.769	-0.0024417	1.4839	0.00075976	-3.2851	-0.0016819	511.997838405033	31.317	0.28767	31.317	31.148	31.436	0					22	6	5	0	0	0	0.00012547	1	2395	122.01
ALGSDLDSSLASLVGNLGISGTTSK	25	Unmodified	_ALGSDLDSSLASLVGNLGISGTTSK_					0	0	0	0	F1MGT4	F1MGT4	F1MGT4	MULTI-MSMS	20140904-PurClathDigest-1ug-01	1	1182.62	2	1182.11865	2362.22275	19668.13	-3.298	-0.0038987	1.0795	0.0012761	-2.2186	-0.0026226	1182.62128906044	56.855	1.002	56.855	56.158	57.16	-3.8147E-06					50	21	6	0	0	0	4.9638E-19	1	9352	192.1
ALGSDLDSSLASLVGNLGISGTTSK	25	Unmodified	_ALGSDLDSSLASLVGNLGISGTTSK_					0	0	0	0	F1MGT4	F1MGT4	F1MGT4	MULTI-MSMS	20140904-PurClathDigest-1ug-02	2	1182.62	2	1182.11865	2362.22275	19377.22	-2.5463	-0.00301	1.8221	0.0021539	-0.72417	-0.00085606	1182.62202903285	56.921	0.63367	56.921	56.706	57.34	-3.8147E-06					41	11	5	0	0	0	4.5076E-13	1	8596	152.28
ALGSDLDSSLASLVGNLGISGTTSK	25	Unmodified	_ALGSDLDSSLASLVGNLGISGTTSK_					0	0	0	0	F1MGT4	F1MGT4	F1MGT4	MULTI-MSMS	20140904-PurClathDigest-1ug-03	3	1182.62	2	1182.11865	2362.22275	19577.76	-2.1248	-0.0025118	0.23288	0.00027529	-1.8919	-0.0022365	1182.61983687882	56.976	0.56934	56.976	56.678	57.248	0					34	9	5	0	0	0	2.8405E-08	1	8297	141.36
ALSSEGKPYVTKEELYQNLTR	21	Unmodified	_ALSSEGKPYVTKEELYQNLTR_					0	0	0	2	E1BFB0	E1BFB0	E1BFB0	MULTI-MSMS	20140904-PurClathDigest-1ug-01	1	809.75	3	809.423578	2425.2489	23402.43	-5.1924	-0.0042029	-0.1426	-0.00011542	-5.335	-0.0043183	809.757801895746	42.004	0.32816	42.004	41.852	42.18	0					34	10	6	0	0	0	5.0071E-09	1	5565	148.75
ALSSEGKPYVTKEELYQNLTR	21	Unmodified	_ALSSEGKPYVTKEELYQNLTR_					0	0	0	2	E1BFB0	E1BFB0	E1BFB0	MULTI-MSMS	20140904-PurClathDigest-1ug-03	3	809.75	3	809.423578	2425.2489	22824.15	-5.7651	-0.0046664	0.50494	0.00040871	-5.2602	-0.0042577	809.757923248237	42.227	0.33717	42.227	42.036	42.373	0					37	9	6	0	0	0	1.9666E-06	1	4886	138.28
ALTNQQEASVER	12	Unmodified	_ALTNQQEASVER_					0	0	0	0	F1MIC9	F1MIC9	F1MIC9	MULTI-MSMS	20140904-PurClathDigest-1ug-01	1	673.33	2	673.338955	1344.66336	25653.87	-6.3889	-0.0043019	0.032184	2.1671E-05	-6.3567	-0.0042802	673.339137273771	33.777	0.43933	33.777	33.481	33.92	3.8147E-06					37	13	4	0	0	0	1.7315E-07	1	3445	191.79
ALTNQQEASVER	12	Unmodified	_ALTNQQEASVER_					0	0	0	0	F1MIC9	F1MIC9	F1MIC9	MULTI-MSMS	20140904-PurClathDigest-1ug-02	2	673.34	2	673.338955	1344.66336	26063.01	-5.5262	-0.003721	0.016901	1.138E-05	-5.5092	-0.0037096	673.339002754314	34.023	0.39017	34.023	33.825	34.215	0					36	10	5	0	0	0	1.2868E-06	1	3162	165.58
ALTNQQEASVER	12	Unmodified	_ALTNQQEASVER_					0	0	0	0	F1MIC9	F1MIC9	F1MIC9	MULTI-MSMS	20140904-PurClathDigest-1ug-03	3	673.33	2	673.338955	1344.66336	26108.96	-5.2663	-0.003546	-0.55905	-0.00037643	-5.8254	-0.0039225	673.338709350656	34.076	0.326	34.076	33.91	34.236	0					32	8	5	0	0	0	7.3455E-06	1	2997	130.1
ALTVPELTQQMFDSK	15	Oxidation (M)	_ALTVPELTQQM(ox)FDSK_		ALTVPELTQQM(1)FDSK		ALTVPELTQQM(98.68)FDSK	0	0	1	0	E1BJB1;Q6B856	E1BJB1	E1BJB1	MULTI-MSMS	20140904-PurClathDigest-1ug-01	1	862.43	2	862.432195	1722.84984	22371.92	-3.3174	-0.002861	-0.87437	-0.00075408	-4.1918	-0.0036151	862.431759903632	45.674	0.68541	45.674	45.193	45.878	0					70	22	4	0	0	0	0.0035258	1	6564	98.676
ALTVPELTQQMFDSK	15	Oxidation (M)	_ALTVPELTQQM(ox)FDSK_		ALTVPELTQQM(1)FDSK		ALTVPELTQQM(81.45)FDSK	0	0	1	0	E1BJB1;Q6B856	E1BJB1	E1BJB1	MULTI-MSMS	20140904-PurClathDigest-1ug-02	2	862.43	2	862.432195	1722.84984	22533.26	-3.7244	-0.0032121	0.04313	3.7197E-05	-3.6813	-0.0031749	862.43234516497	46.168	0.643	46.168	45.737	46.38	0					76	20	5	0	0	0	0.027848	1	6127	81.448
ALTVPELTQQMFDSK	15	Oxidation (M)	_ALTVPELTQQM(ox)FDSK_		ALTVPELTQQM(1)FDSK		ALTVPELTQQM(109.07)FDSK	0	0	1	0	E1BJB1;Q6B856	E1BJB1	E1BJB1	MULTI-MSMS	20140904-PurClathDigest-1ug-03	3	862.43	2	862.432195	1722.84984	22780.31	-3.4217	-0.0029509	-0.57469	-0.00049563	-3.9964	-0.0034466	862.431784256079	46.099	0.64917	46.099	45.661	46.311	3.8147E-06					76	20	5	0	0	0	0.0022568	1	5853	109.07
ALVTTHHLMVHGNER	15	Oxidation (M)	_ALVTTHHLM(ox)VHGNER_		ALVTTHHLM(1)VHGNER		ALVTTHHLM(59.71)VHGNER	0	0	1	0	F1MGT4	F1MGT4	F1MGT4	MULTI-MSMS	20140904-PurClathDigest-1ug-01	1	433.47	4	433.474332	1729.86822	31952.75	-6.6539	-0.0028843	-0.062008	-2.6879E-05	-6.7159	-0.0029112	433.474389846031	32.483	0.32775	32.483	32.339	32.667	0					36	10	5	0	0	0	0.01309	1	3118	59.709
ALVTTHHLMVHGNER	15	Oxidation (M)	_ALVTTHHLM(ox)VHGNER_		ALVTTHHLM(1)VHGNER		ALVTTHHLM(90.71)VHGNER	0	0	1	0	F1MGT4	F1MGT4	F1MGT4	MULTI-MSMS	20140904-PurClathDigest-1ug-02	2	433.47	4	433.474332	1729.86822	32127.25	-6.5266	-0.0028291	0.4161	0.00018037	-6.1105	-0.0026487	433.474640041867	32.675	0.36008	32.675	32.5	32.86	0					29	10	4	0	0	0	0.0010827	1	2856	90.707
ALVTTHHLMVHGNER	15	Oxidation (M)	_ALVTTHHLM(ox)VHGNER_		ALVTTHHLM(1)VHGNER		ALVTTHHLM(81.63)VHGNER	0	0	1	0	F1MGT4	F1MGT4	F1MGT4	MULTI-MSMS	20140904-PurClathDigest-1ug-03	3	433.47	4	433.474332	1729.86822	32132.65	-6.6204	-0.0028698	0.14966	6.4873E-05	-6.4707	-0.0028049	433.474534199252	32.771	0.83492	32.771	32.579	33.414	0					45	22	6	0	0	0	0.00057824	1	2707	81.632
ALYEQEIR	8	Unmodified	_ALYEQEIR_					0	0	0	0	P02548	P02548	P02548	MULTI-MSMS	20140904-PurClathDigest-1ug-01	1	511.27	2	511.269281	1020.52401	28617.83	-5.9337	-0.0030337	-0.2833	-0.00014484	-6.217	-0.0031786	511.26905080971	38.736	0.39433	38.736	38.608	39.002	0					44	12	5	0	0	0	0.00040482	1	4712	173.68
ALYEQEIR	8	Unmodified	_ALYEQEIR_					0	0	0	0	P02548	P02548	P02548	MULTI-MSMS	20140904-PurClathDigest-1ug-02	2	511.27	2	511.269281	1020.52401	28603.07	-4.7439	-0.0024254	-0.70174	-0.00035878	-5.4456	-0.0027842	511.268834301834	39.098	0.79325	39.098	38.794	39.587	0					63	23	6	0	0	0	0.0037572	1	4330	113.41
ALYEQEIR	8	Unmodified	_ALYEQEIR_					0	0	0	0	P02548	P02548	P02548	MULTI-MSMS	20140904-PurClathDigest-1ug-03	3	511.27	2	511.269281	1020.52401	28983.51	-4.8641	-0.0024868	-0.9256	-0.00047323	-5.7897	-0.0029601	511.268680681678	39.262	1.188	39.262	38.974	40.162	0					75	34	6	0	0	0	0.00099839	1	4144	134.81
AMLSANIR	8	Oxidation (M)	_AM(ox)LSANIR_		AM(1)LSANIR		AM(109.01)LSANIR	0	0	1	0	P49951;F1MPU0	P49951	P49951	MULTI-MSMS	20140904-PurClathDigest-1ug-01	1	446.24	2	446.23947	890.464386	31597.71	-6.676	-0.0029791	-0.47251	-0.00021085	-7.1485	-0.00319	446.239461789778	35.53	2.8046	35.53	35.161	37.966	0					238	88	6	0	0	0	0.029712	4	4080	109.01
AMLSANIR	8	Oxidation (M)	_AM(ox)LSANIR_		AM(1)LSANIR		AM(109.01)LSANIR	0	0	1	0	P49951;F1MPU0	P49951	P49951	MULTI-MSMS	20140904-PurClathDigest-1ug-02	2	446.24	2	446.23947	890.464386	31725.99	-6.4277	-0.0028683	-0.33341	-0.00014878	-6.7611	-0.0030171	446.239376776354	35.846	2.6867	35.846	35.429	38.116	0					152	78	2	0	0	0	0.029712	3	3660	109.01
AMLSANIR	8	Oxidation (M)	_AM(ox)LSANIR_		AM(1)LSANIR		AM(45.7)LSANIR	0	0	1	0	P49951;F1MPU0	P49951	P49951	MULTI-SECPEP	20140904-PurClathDigest-1ug-02	2	446.76	2	446.23947	890.464386	33842.18	-6.4097	-0.0028602	0.85699	0.00038242	-5.5527	-0.0024778	446.239788969515	34.792	0.23383	34.792	34.655	34.889	0					13	6	3	0	0	0	0.053441	1	3348	45.7
AMLSANIR	8	Oxidation (M)	_AM(ox)LSANIR_		AM(1)LSANIR		AM(113.5)LSANIR	0	0	1	0	P49951;F1MPU0	P49951	P49951	MULTI-MSMS	20140904-PurClathDigest-1ug-03	3	446.24	2	446.23947	890.464386	31635.8	-6.6789	-0.0029804	-0.67511	-0.00030126	-7.354	-0.0032816	446.239383415715	35.805	2.8088	35.805	35.37	38.179	0					218	77	6	0	0	0	0.018548	5	3352	113.5
AMLSANIR	8	Unmodified	_AMLSANIR_					0	0	0	0	P49951;F1MPU0	P49951	P49951	MULTI-MSMS	20140904-PurClathDigest-1ug-02	2	438.24	2	438.242012	874.469472	31693.72	-4.8254	-0.0021147	0.4437	0.00019445	-4.3817	-0.0019202	438.242298011863	39.171	0.43125	39.171	38.994	39.425	0					19	12	2	0	0	0	0.0010958	1	4349	127.84
AMLSANIR	8	Unmodified	_AMLSANIR_					0	0	0	0	P49951;F1MPU0	P49951	P49951	MULTI-MSMS	20140904-PurClathDigest-1ug-03	3	438.24	2	438.242012	874.469472	31988.9	-4.9256	-0.0021586	0.52752	0.00023118	-4.398	-0.0019274	438.242348655127	39.301	0.43533	39.301	39.11	39.545	0					18	12	2	0	0	0	0.0020993	1	4162	122.13
ANEQLTDELAQK	12	Unmodified	_ANEQLTDELAQK_					0	0	0	0	F6RAG5	F6RAG5	F6RAG5	MULTI-MSMS	20140904-PurClathDigest-1ug-01	1	680.34	2	680.341163	1358.66777	27317.19	-5.144	-0.0034997	0.56871	0.00038692	-4.5753	-0.0031127	680.340807631846	39.376	0.39384	39.376	39.185	39.579	0					24	12	3	0	0	0	3.4874E-06	1	4894	132.56
APHWTSAQLTEASAQPHPPEIK	22	Unmodified	_APHWTSAQLTEASAQPHPPEIK_					0	0	0	0	F1MEW3	F1MEW3	F1MEW3	MULTI-MSMS	20140904-PurClathDigest-1ug-01	1	600.05	4	599.805291	2395.19206	27184.93	-6.3878	-0.0038314	0.026964	1.6173E-05	-6.3608	-0.0038153	600.056063392689	40.315	1.2743	40.315	39.46	40.734	0					149	41	6	0	0	0	0.00011086	2	5152	80.236
APHWTSAQLTEASAQPHPPEIK	22	Unmodified	_APHWTSAQLTEASAQPHPPEIK_					0	0	0	0	F1MEW3	F1MEW3	F1MEW3	MULTI-MSMS	20140904-PurClathDigest-1ug-01	1	799.73	3	799.404629	2395.19206	23658.47	-6.1557	-0.0049209	-0.27099	-0.00021663	-6.4267	-0.0051376	799.738649079798	40.308	1.3362	40.308	39.46	40.796	0					170	43	6	0	0	0	0.00012698	2	5161	86.136
APHWTSAQLTEASAQPHPPEIK	22	Unmodified	_APHWTSAQLTEASAQPHPPEIK_					0	0	0	0	F1MEW3	F1MEW3	F1MEW3	MULTI-MSMS	20140904-PurClathDigest-1ug-02	2	799.73	3	799.404629	2395.19206	23584.19	-5.765	-0.0046085	-0.5524	-0.00044159	-6.3174	-0.0050501	799.73855497091	40.728	1.2008	40.728	39.915	41.115	0					144	36	6	0	0	0	0.00064503	1	4720	112.14
APHWTSAQLTEASAQPHPPEIK	22	Unmodified	_APHWTSAQLTEASAQPHPPEIK_					0	0	0	0	F1MEW3	F1MEW3	F1MEW3	MULTI-MSMS	20140904-PurClathDigest-1ug-02	2	600.05	4	599.805291	2395.19206	26949.9	-5.9225	-0.0035523	-0.29425	-0.00017649	-6.2167	-0.0037288	600.055860706225	40.739	1.2631	40.739	39.882	41.145	0					127	38	7	0	0	0	0.00037639	1	4724	81.003
APHWTSAQLTEASAQPHPPEIK	22	Unmodified	_APHWTSAQLTEASAQPHPPEIK_					0	0	0	0	F1MEW3	F1MEW3	F1MEW3	MULTI-MSMS	20140904-PurClathDigest-1ug-02	2	1199.09	2	1198.60331	2395.19206	19493.38	-6.9284	-0.0083044	0.58313	0.00069895	-6.3453	-0.0076055	1199.10505051314	40.736	0.61567	40.736	40.345	40.961	0					59	18	5	0	0	0	0.0030853	1	4736	70.452
APHWTSAQLTEASAQPHPPEIK	22	Unmodified	_APHWTSAQLTEASAQPHPPEIK_					0	0	0	0	F1MEW3	F1MEW3	F1MEW3	MULTI-MSMS	20140904-PurClathDigest-1ug-03	3	600.05	4	599.805291	2395.19206	27210.14	-6.1713	-0.0037016	-0.075241	-4.513E-05	-6.2466	-0.0037467	600.05599215039	40.705	1.2512	40.705	39.889	41.14	3.8147E-06					120	37	8	0	0	0	4.3878E-06	1	4486	90.729
APHWTSAQLTEASAQPHPPEIK	22	Unmodified	_APHWTSAQLTEASAQPHPPEIK_					0	0	0	0	F1MEW3	F1MEW3	F1MEW3	MULTI-MSMS	20140904-PurClathDigest-1ug-03	3	799.74	3	799.404629	2395.19206	23504.16	-5.733	-0.004583	-0.56125	-0.00044866	-6.2942	-0.0050316	799.738476580633	40.702	1.2153	40.702	39.925	41.14	0					138	36	8	0	0	0	2.6973E-09	1	4492	129.98
APILSDSSCK	10	Unmodified	_APILSDSSCK_					0	0	0	0	P00760	P00760	P00760	MULTI-MSMS	20140904-PurClathDigest-1ug-03	3	510.75	2	510.755149	1019.49575	29275.15	-6.2159	-0.0031748	-0.99043	-0.00050587	-7.2064	-0.0036807	510.754588081883	38.167	0.3015	38.167	38.035	38.336	0					17	7	3	0	0	0	0.00039559	1	3916	123.75
APPTLFGHTLGASLEDTKPK	20	Unmodified	_APPTLFGHTLGASLEDTKPK_					0	0	0	1	F1MEW3	F1MEW3	F1MEW3	MULTI-MSMS	20140904-PurClathDigest-1ug-01	1	694.37	3	694.040628	2079.10005	25427.22	-4.2797	-0.0029703	0.37597	0.00026094	-3.9037	-0.0027094	694.375101387713	44.219	0.32759	44.219	44.024	44.352	3.8147E-06					38	10	5	0	0	0	0.017723	1	6162	71.853
APPTLFGHTLGASLEDTKPK	20	Unmodified	_APPTLFGHTLGASLEDTKPK_					0	0	0	1	F1MEW3	F1MEW3	F1MEW3	MULTI-MSMS	20140904-PurClathDigest-1ug-02	2	694.37	3	694.040628	2079.10005	25235.55	-4.6549	-0.0032307	0.98965	0.00068686	-3.6653	-0.0025438	694.375543637084	44.74	0.3475	44.74	44.562	44.91	0					37	10	5	0	0	0	0.00035278	1	5748	101.38
APPTLFGHTLGASLEDTKPK	20	Unmodified	_APPTLFGHTLGASLEDTKPK_					0	0	0	1	F1MEW3	F1MEW3	F1MEW3	MULTI-MSMS	20140904-PurClathDigest-1ug-03	3	694.37	3	694.040628	2079.10005	25494.05	-4.9969	-0.003468	0.80811	0.00056086	-4.1888	-0.0029072	694.375362879539	44.809	0.31483	44.809	44.646	44.961	0					37	9	6	0	0	0	6.6125E-06	1	5508	120.79
AQALLER	7	Unmodified	_AQALLER_					0	0	0	0	Q08DH7	Q08DH7	Q08DH7	MULTI-MSMS	20140904-PurClathDigest-1ug-01	1	400.73	2	400.734877	799.455202	32406.77	-6.8586	-0.0027485	1.1334	0.00045419	-5.7252	-0.0022943	400.735298564084	35.577	1.1813	35.577	35.312	36.493	0					72	36	3	0	0	0	0.007415	1	3865	116.54
AQALLER	7	Unmodified	_AQALLER_					0	0	0	0	Q08DH7	Q08DH7	Q08DH7	MULTI-MSMS	20140904-PurClathDigest-1ug-02	2	400.73	2	400.734877	799.455202	32877.07	-6.3638	-0.0025502	0.92446	0.00037046	-5.4393	-0.0021797	400.735196370875	35.943	1.1632	35.943	35.721	36.884	3.8147E-06					63	33	3	0	0	0	0.0029968	2	3582	154.35
AQALLER	7	Unmodified	_AQALLER_					0	0	0	0	Q08DH7	Q08DH7	Q08DH7	MULTI-MSMS	20140904-PurClathDigest-1ug-03	3	400.73	2	400.734877	799.455202	32400.47	-6.6191	-0.0026525	0.92468	0.00037055	-5.6944	-0.002282	400.73519722259	35.935	1.1842	35.935	35.708	36.893	0					66	32	4	0	0	0	0.0027282	1	3403	158.03
AQALLERDGLAEEVQR	16	Unmodified	_AQALLERDGLAEEVQR_					0	0	0	1	Q08DH7	Q08DH7	Q08DH7	MULTI-MSMS	20140904-PurClathDigest-1ug-01	1	899.97	2	899.476314	1796.93808	22274.73	-5.7029	-0.0051296	-0.54572	-0.00049086	-6.2486	-0.0056205	899.475582212708	40.766	0.39975	40.766	40.617	41.016	0					39	12	4	0	0	0	1.1102E-08	1	5251	164.01
AQALLERDGLAEEVQR	16	Unmodified	_AQALLERDGLAEEVQR_					0	0	0	1	Q08DH7	Q08DH7	Q08DH7	MULTI-MSMS	20140904-PurClathDigest-1ug-03	3	899.47	2	899.476314	1796.93808	22266.33	-5.2478	-0.0047203	-0.47002	-0.00042277	-5.7178	-0.0051431	899.475672783685	41.128	0.21575	41.128	41.017	41.233	0					23	6	5	0	0	0	4.512E-08	1	4622	156.49
AQILPIR	7	Acetyl (Protein N-term)	_(ac)AQILPIR_					1	0	0	0	P49951	P49951	P49951	MULTI-MSMS	20140904-PurClathDigest-1ug-01	1	426.77	2	426.76872	851.522887	31698.31	-3.5444	-0.0015126	-0.68443	-0.00029209	-4.2288	-0.0018047	426.768454769543	48.47	0.81542	48.47	48.181	48.996	0					83	26	4	0	0	0	0.0044377	2	7304	100.07
AQILPIR	7	Acetyl (Protein N-term)	_(ac)AQILPIR_					1	0	0	0	P49951	P49951	P49951	MULTI-SECPEP	20140904-PurClathDigest-1ug-01	1	853.03	1	852.530164	851.522887	22785.24	-3.0179	-0.0025728	-1.5661	-0.0013351	-4.584	-0.003908	852.529038136333	48.487	1.5452	48.487	48.181	49.726	0					180	50	5	0	0	0	0.026222	1	7564	77.748
AQILPIR	7	Acetyl (Protein N-term)	_(ac)AQILPIR_					1	0	0	0	P49951	P49951	P49951	MULTI-MSMS	20140904-PurClathDigest-1ug-02	2	426.77	2	426.76872	851.522887	31567.54	-3.5089	-0.0014975	-0.70616	-0.00030137	-4.215	-0.0017988	426.768422097279	48.727	0.97133	48.727	48.5	49.471	0					78	28	5	0	0	0	0.010955	2	6796	62.714
AQILPIR	7	Acetyl (Protein N-term)	_(ac)AQILPIR_					1	0	0	0	P49951	P49951	P49951	MULTI-SECPEP	20140904-PurClathDigest-1ug-02	2	853.03	1	852.530164	851.522887	22803.66	-3.4264	-0.0029211	-0.86243	-0.00073525	-4.2889	-0.0036564	852.529590695252	48.743	1.6743	48.743	48.405	50.079	0					172	49	5	0	0	0	0.038157	1	7016	66.994
AQILPIR	7	Acetyl (Protein N-term)	_(ac)AQILPIR_					1	0	0	0	P49951	P49951	P49951	MULTI-MSMS	20140904-PurClathDigest-1ug-03	3	426.77	2	426.76872	851.522887	31832.42	-3.8669	-0.0016503	-0.068735	-2.9334E-05	-3.9356	-0.0016796	426.768717703647	48.817	0.81533	48.817	48.51	49.326	0					74	23	4	0	0	0	0.010479	1	6475	86.866
AQLADSFHLQQFFR	14	Unmodified	_AQLADSFHLQQFFR_					0	0	0	0	E1BFB0	E1BFB0	E1BFB0	MULTI-MSMS	20140904-PurClathDigest-1ug-01	1	569.96	3	569.958239	1706.85289	28610.81	-3.3377	-0.0019023	-0.20086	-0.00011448	-3.5385	-0.0020168	570.292499033392	50.336	1.1918	50.336	49.905	51.097	0					68	37	5	0	0	0	2.4376E-05	1	7780	119.39
AQLEEASSAR	10	Unmodified	_AQLEEASSAR_					0	0	0	0	Q08DH7	Q08DH7	Q08DH7	MULTI-MSMS	20140904-PurClathDigest-1ug-01	1	531.26	2	531.264727	1060.5149	28986.41	-6.6038	-0.0035083	0.092734	4.9266E-05	-6.511	-0.0034591	531.26474663011	32.482	0.93225	32.482	32.246	33.179	0					56	29	4	0	0	0	0.00011753	1	3096	152.54
AQLEEASSAR	10	Unmodified	_AQLEEASSAR_					0	0	0	0	Q08DH7	Q08DH7	Q08DH7	MULTI-MSMS	20140904-PurClathDigest-1ug-02	2	531.26	2	531.264727	1060.5149	28934	-6.3596	-0.0033786	-0.022455	-1.193E-05	-6.3821	-0.0033906	531.26472901426	32.608	1.05	32.608	32.325	33.375	0					59	29	4	0	0	0	0.00012995	1	2813	155.26
AQLEEASSAR	10	Unmodified	_AQLEEASSAR_					0	0	0	0	Q08DH7	Q08DH7	Q08DH7	MULTI-MSMS	20140904-PurClathDigest-1ug-03	3	531.26	2	531.264727	1060.5149	28819.41	-6.538	-0.0034734	0.38705	0.00020563	-6.1509	-0.0032678	531.264877603537	32.684	0.66317	32.684	32.434	33.098	0					50	18	4	0	0	0	0.00016252	1	2672	147.73
AQLEGHTVQSTLQSEEWFR	19	Unmodified	_AQLEGHTVQSTLQSEEWFR_					0	0	0	0	F1MSQ6	F1MSQ6	F1MSQ6	MULTI-MSMS	20140904-PurClathDigest-1ug-01	1	1123.54	2	1123.54546	2245.07636	20034.6	-4.0851	-0.0045898	-0.52246	-0.00058701	-4.6075	-0.0051768	1124.04628897299	46.281	0.72667	46.281	46	46.726	0					90	23	6	0	0	0	2.7664E-27	1	6694	241.13
AQLEGHTVQSTLQSEEWFR	19	Unmodified	_AQLEGHTVQSTLQSEEWFR_					0	0	0	0	F1MSQ6	F1MSQ6	F1MSQ6	MULTI-MSMS	20140904-PurClathDigest-1ug-01	1	749.7	3	749.366063	2245.07636	24571.37	-3.8405	-0.0028779	-0.033804	-2.5331E-05	-3.8743	-0.0029033	749.700237675791	46.3	0.9375	46.3	46.059	46.997	0					115	30	7	0	0	0	4.1367E-13	1	6699	150.91
AQLEGHTVQSTLQSEEWFR	19	Unmodified	_AQLEGHTVQSTLQSEEWFR_					0	0	0	0	F1MSQ6	F1MSQ6	F1MSQ6	MULTI-MSMS	20140904-PurClathDigest-1ug-02	2	749.7	3	749.366063	2245.07636	24609.34	-4.5098	-0.0033795	0.67456	0.00050549	-3.8352	-0.002874	749.700866610292	46.8	0.87074	46.8	46.443	47.314	0					99	27	6	0	0	0	3.5482E-05	2	6251	84.436
AQLEGHTVQSTLQSEEWFR	19	Unmodified	_AQLEGHTVQSTLQSEEWFR_					0	0	0	0	F1MSQ6	F1MSQ6	F1MSQ6	MULTI-MSMS	20140904-PurClathDigest-1ug-02	2	1124.04	2	1123.54546	2245.07636	20032.67	-4.8971	-0.0055021	0.44969	0.00050525	-4.4474	-0.0049968	1124.04720559467	46.79	0.74434	46.79	46.476	47.22	0					87	23	6	0	0	0	1.9501E-21	1	6255	207.56
AQLEGHTVQSTLQSEEWFR	19	Unmodified	_AQLEGHTVQSTLQSEEWFR_					0	0	0	0	F1MSQ6	F1MSQ6	F1MSQ6	MULTI-MSMS	20140904-PurClathDigest-1ug-03	3	1124.04	2	1123.54546	2245.07636	19999.51	-4.9254	-0.0055339	0.257	0.00028875	-4.6684	-0.0052451	1124.04698328219	46.621	0.5915	46.621	46.342	46.934	0					67	18	5	0	0	0	9.0615E-22	1	5958	218.14
AQLEGHTVQSTLQSEEWFR	19	Unmodified	_AQLEGHTVQSTLQSEEWFR_					0	0	0	0	F1MSQ6	F1MSQ6	F1MSQ6	MULTI-MSMS	20140904-PurClathDigest-1ug-03	3	749.7	3	749.366063	2245.07636	24456.77	-4.764	-0.00357	0.62727	0.00047005	-4.1368	-0.0030999	749.700855802479	46.642	0.84625	46.642	46.374	47.221	0					107	26	7	0	0	0	8.9226E-09	1	5961	136.66
AQLQDLNDR	9	Deamidation (NQ)	_AQLQDLN(de)DR_	AQLQDLN(1)DR		AQ(-96.2)LQ(-36.07)DLN(36.07)DR		0	1	0	0	P02548	P02548	P02548	MULTI-MSMS	20140904-PurClathDigest-1ug-01	1	537.26	2	537.264727	1072.5149	30052.53	-6.2653	-0.0033661	-1.2625	-0.00067828	-7.5278	-0.0040444	537.263514070289	36.448	0.48217	36.448	36.304	36.786	0					32	14	3	0	0	0	0.0024853	1	4130	159.28
AQLQDLNDR	9	Deamidation (NQ)	_AQLQDLN(de)DR_	AQLQDLN(1)DR		AQ(-87.43)LQ(-34.4)DLN(34.4)DR		0	1	0	0	P02548	P02548	P02548	MULTI-MSMS	20140904-PurClathDigest-1ug-02	2	537.26	2	537.264727	1072.5149	29404.9	-5.9587	-0.0032014	-2.1782	-0.0011703	-8.1369	-0.0043717	537.263209874669	36.648	0.49683	36.648	36.49	36.987	0					31	13	3	0	0	0	0.0025408	1	3778	148.14
AQLQDLNDR	9	Unmodified	_AQLQDLNDR_					0	0	0	0	P02548	P02548	P02548	MULTI-MSMS	20140904-PurClathDigest-1ug-03	3	536.77	2	536.772719	1071.53089	28585.87	-5.6033	-0.0030077	-0.35688	-0.00019157	-5.9601	-0.0031992	536.772834309002	36.34	1.0217	36.34	36.094	37.115	3.8147E-06					66	27	6	0	0	0	0.00049284	1	3493	128.86
AQTLPTSVVTITSESSPGKR	20	Unmodified	_AQTLPTSVVTITSESSPGKR_					0	0	0	1	F1MYC9	F1MYC9	F1MYC9	MULTI-MSMS	20140904-PurClathDigest-1ug-01	1	687.37	3	687.039176	2058.0957	24958.91	-5.4837	-0.0037675	-0.37635	-0.00025856	-5.86	-0.0040261	687.373149257357	41.949	0.66742	41.949	41.632	42.299	0					53	21	5	0	0	0	0.021786	1	5554	57.366
AQTLPTSVVTITSESSPGKR	20	Unmodified	_AQTLPTSVVTITSESSPGKR_					0	0	0	1	F1MYC9	F1MYC9	F1MYC9	MULTI-MSMS	20140904-PurClathDigest-1ug-03	3	687.37	3	687.039176	2058.0957	24789.23	-6.4985	-0.0044647	0.53443	0.00036717	-5.9641	-0.0040976	687.373688960002	42.157	0.70734	42.157	41.698	42.405	0					50	20	4	0	0	0	0.022972	1	4852	56.081
AQVQLDSDHLEEDIHR	16	Unmodified	_AQVQLDSDHLEEDIHR_					0	0	0	0	F1MDZ2;O77788	F1MDZ2	F1MDZ2	MULTI-MSMS	20140904-PurClathDigest-1ug-01	1	635.64	3	635.641416	1903.90242	26573.19	-4.8717	-0.0030966	-0.66184	-0.0004207	-5.5335	-0.0035173	635.975154018549	39.777	1.0078	39.777	39.519	40.527	-3.8147E-06					116	31	8	0	0	0	2.185E-08	2	4963	145.69
AQVQLDSDHLEEDIHR	16	Unmodified	_AQVQLDSDHLEEDIHR_					0	0	0	0	F1MDZ2;O77788	F1MDZ2	F1MDZ2	MULTI-MSMS	20140904-PurClathDigest-1ug-01	1	476.98	4	476.982881	1903.90242	30234.06	-5.0455	-0.0024066	-0.28566	-0.00013626	-5.3312	-0.0025429	476.983038675795	39.772	0.76466	39.772	39.579	40.344	0					101	24	7	0	0	0	3.7194E-05	2	4964	102.65
AQVQLDSDHLEEDIHR	16	Unmodified	_AQVQLDSDHLEEDIHR_					0	0	0	0	F1MDZ2;O77788	F1MDZ2	F1MDZ2	MULTI-MSMS	20140904-PurClathDigest-1ug-01	1	953.46	2	952.958485	1903.90242	21522.99	-4.7089	-0.0044874	-0.59387	-0.00056593	-5.3027	-0.0050533	952.958006661592	39.766	0.51625	39.766	39.61	40.126	0					65	16	6	0	0	0	7.4107E-11	1	4970	178
AQVQLDSDHLEEDIHR	16	Unmodified	_AQVQLDSDHLEEDIHR_					0	0	0	0	F1MDZ2;O77788	F1MDZ2	F1MDZ2	MULTI-MSMS	20140904-PurClathDigest-1ug-02	2	635.64	3	635.641416	1903.90242	26600.17	-4.1752	-0.0026539	-0.77836	-0.00049476	-4.9535	-0.0031487	635.641268896905	40.187	1.1395	40.187	39.946	41.086	0					122	33	7	0	0	0	1.7893E-09	2	4586	157.68
AQVQLDSDHLEEDIHR	16	Unmodified	_AQVQLDSDHLEEDIHR_					0	0	0	0	F1MDZ2;O77788	F1MDZ2	F1MDZ2	MULTI-MSMS	20140904-PurClathDigest-1ug-02	2	477.23	4	476.982881	1903.90242	30255.59	-4.1791	-0.0019934	-0.606	-0.00028905	-4.7851	-0.0022824	476.982868511028	40.179	0.92117	40.179	39.977	40.899	0					105	27	7	0	0	0	3.3773E-08	1	4587	127.18
AQVQLDSDHLEEDIHR	16	Unmodified	_AQVQLDSDHLEEDIHR_					0	0	0	0	F1MDZ2;O77788	F1MDZ2	F1MDZ2	MULTI-MSMS	20140904-PurClathDigest-1ug-02	2	953.46	2	952.958485	1903.90242	21764.56	-4.1075	-0.0039143	-0.54188	-0.00051639	-4.6494	-0.0044307	952.958022795714	40.17	0.4645	40.17	40.01	40.474	0					52	13	6	0	0	0	9.0308E-12	1	4594	182.35
AQVQLDSDHLEEDIHR	16	Unmodified	_AQVQLDSDHLEEDIHR_					0	0	0	0	F1MDZ2;O77788	F1MDZ2	F1MDZ2	MULTI-MSMS	20140904-PurClathDigest-1ug-03	3	635.64	3	635.641416	1903.90242	26551.76	-4.1577	-0.0026428	-1.2565	-0.00079869	-5.4142	-0.0034415	635.640973362229	40.202	1.2043	40.202	40.029	41.233	0					97	36	7	0	0	0	2.8015E-13	1	4368	196.67
AQVQLDSDHLEEDIHR	16	Unmodified	_AQVQLDSDHLEEDIHR_					0	0	0	0	F1MDZ2;O77788	F1MDZ2	F1MDZ2	MULTI-MSMS	20140904-PurClathDigest-1ug-03	3	476.98	4	476.982881	1903.90242	30357.18	-3.9209	-0.0018702	-1.2171	-0.00058053	-5.138	-0.0024507	476.982568127849	40.193	0.73292	40.193	40.029	40.762	0					86	21	7	0	0	0	3.4959E-08	1	4369	126.16
AQVQLDSDHLEEDIHR	16	Unmodified	_AQVQLDSDHLEEDIHR_					0	0	0	0	F1MDZ2;O77788	F1MDZ2	F1MDZ2	MULTI-MSMS	20140904-PurClathDigest-1ug-03	3	952.95	2	952.958485	1903.90242	21519.06	-4.1463	-0.0039513	-0.89176	-0.00084981	-5.0381	-0.0048011	953.458964270875	40.186	0.50017	40.186	40.063	40.563	0					45	14	6	0	0	0	2.0556E-17	1	4376	223.76
AQWGENLQVTLIPTHDTEVTR	21	Unmodified	_AQWGENLQVTLIPTHDTEVTR_					0	0	0	0	F1N3M8;G3MYP5	F1N3M8;G3MYP5	G3MYP5	MULTI-MSMS	20140904-PurClathDigest-1ug-03	3	803.74	3	803.411672	2407.21319	24190.27	-3.9826	-0.0031997	-1.0831	-0.00087018	-5.0657	-0.0040699	803.744836859256	47.248	0.933	47.248	46.997	47.93	0					85	27	5	0	0	0	0.048208	1	6116	34.65
AQWGSNMQVTLIPTHDSEVMR	21	2 Oxidation (M)	_AQWGSNM(ox)QVTLIPTHDSEVM(ox)R_		AQWGSNM(1)QVTLIPTHDSEVM(1)R		AQWGSNM(42.64)QVTLIPTHDSEVM(42.64)R	0	0	2	0	F1N1S2	F1N1S2	F1N1S2	MULTI-MSMS	20140904-PurClathDigest-1ug-01	1	811.71	3	811.382619	2431.12603	23106.33	-5.4189	-0.0043968	0.065244	5.2938E-05	-5.3537	-0.0043439	811.71735166579	42.676	0.47725	42.676	42.45	42.927	3.8147E-06					68	15	7	0	0	0	0.044347	1	5733	42.639
AQWGSNMQVTLIPTHDSEVMR	21	2 Oxidation (M)	_AQWGSNM(ox)QVTLIPTHDSEVM(ox)R_		AQWGSNM(1)QVTLIPTHDSEVM(1)R		AQWGSNM(49.19)QVTLIPTHDSEVM(49.19)R	0	0	2	0	F1N1S2	F1N1S2	F1N1S2	MULTI-MSMS	20140904-PurClathDigest-1ug-03	3	811.71	3	811.382619	2431.12603	22919.71	-5.9419	-0.0048212	0.96445	0.00078254	-4.9775	-0.0040386	811.717981001176	43.074	0.6125	43.074	42.738	43.35	0					75	18	7	0	0	0	0.030655	1	5068	49.188
AQYEEIAQR	9	Unmodified	_AQYEEIAQR_					0	0	0	0	CON__P35908;E1B991;G3MZ71	CON__P35908	CON__P35908	MULTI-SECPEP	20140904-PurClathDigest-1ug-01	1	554.6	2	554.275095	1106.53564	28213.84	-6.0451	-0.0033506	-0.56902	-0.00031539	-6.6141	-0.003666	554.274717138541	35.897	0.44142	35.897	35.675	36.116	0					23	13	2	0	0	0	0.01313	1	4008	100.09
AQYEEIAQR	9	Unmodified	_AQYEEIAQR_					0	0	0	0	CON__P35908;E1B991;G3MZ71	CON__P35908	CON__P35908	MULTI-SECPEP	20140904-PurClathDigest-1ug-03	3	554.6	2	554.275095	1106.53564	28293.99	-5.8621	-0.0032492	-1.5551	-0.00086195	-7.4172	-0.0041112	554.274185080779	36.03	0.47892	36.03	35.815	36.294	0					22	13	2	0	0	0	0.040269	1	3432	78.264
AQYESLAAK	9	Unmodified	_AQYESLAAK_					0	0	0	0	Q08DH7	Q08DH7	Q08DH7	MULTI-MSMS	20140904-PurClathDigest-1ug-03	3	490.75	2	490.756007	979.497461	29664.36	-7.6932	-0.0037755	0.74287	0.00036457	-6.9503	-0.0034109	490.756388258693	35.286	0.62583	35.286	35.048	35.674	0					43	17	4	0	0	0	0.0070925	1	3264	103.55
ARESYVETELIFALAK	16	Unmodified	_ARESYVETELIFALAK_					0	0	0	1	P49951;F1MPU0	P49951	P49951	MULTI-MSMS	20140904-PurClathDigest-1ug-01	1	614	3	613.999881	1838.97781	27414.05	-1.5309	-0.00093994	-0.65116	-0.00039981	-2.182	-0.0013398	613.999402221237	51.625	0.55299	51.625	51.39	51.943	3.8147E-06					67	17	6	0	0	0	0.00090668	1	8092	95.197
ARESYVETELIFALAK	16	Unmodified	_ARESYVETELIFALAK_					0	0	0	1	P49951;F1MPU0	P49951	P49951	MULTI-MSMS	20140904-PurClathDigest-1ug-01	1	920.49	2	920.496184	1838.97781	22031.64	-0.87386	-0.00080438	-2.2093	-0.0020336	-3.0831	-0.002838	920.494349805598	51.621	0.52349	51.621	51.45	51.974	0					52	16	5	0	0	0	2.0717E-05	1	8097	136.34
ARESYVETELIFALAK	16	Unmodified	_ARESYVETELIFALAK_					0	0	0	1	P49951;F1MPU0	P49951	P49951	MULTI-MSMS	20140904-PurClathDigest-1ug-02	2	614.33	3	613.999881	1838.97781	27478.81	-1.5701	-0.00096402	-0.13098	-8.0424E-05	-1.701	-0.0010444	613.999838887826	51.718	0.55183	51.718	51.535	52.087	0					55	16	5	0	0	0	0.00038296	1	7477	92.773
ARESYVETELIFALAK	16	Unmodified	_ARESYVETELIFALAK_					0	0	0	1	P49951;F1MPU0	P49951	P49951	MULTI-MSMS	20140904-PurClathDigest-1ug-02	2	921	2	920.496184	1838.97781	21854.54	-0.70856	-0.00065223	-1.5759	-0.0014506	-2.2845	-0.0021029	920.996008011769	51.716	0.38908	51.716	51.566	51.955	0					40	11	5	0	0	0	0.00067713	1	7484	101.05
ARESYVETELIFALAK	16	Unmodified	_ARESYVETELIFALAK_					0	0	0	1	P49951;F1MPU0	P49951	P49951	MULTI-MSMS	20140904-PurClathDigest-1ug-03	3	614	3	613.999881	1838.97781	27466.34	-1.5841	-0.00097264	-0.44649	-0.00027414	-2.0306	-0.0012468	614.333927113017	51.801	0.57525	51.801	51.628	52.203	3.8147E-06					56	16	5	0	0	0	0.0031244	1	7219	88.385
ARESYVETELIFALAK	16	Unmodified	_ARESYVETELIFALAK_					0	0	0	1	P49951;F1MPU0	P49951	P49951	MULTI-MSMS	20140904-PurClathDigest-1ug-03	3	921	2	920.496184	1838.97781	22537.08	-0.69178	-0.00063678	-2.1384	-0.0019684	-2.8302	-0.0026052	920.995665308383	51.796	0.43933	51.796	51.628	52.067	0					43	12	5	0	0	0	0.00042635	1	7226	110.12
ARFEELNADLFR	12	Unmodified	_ARFEELNADLFR_					0	0	0	1	P19120	P19120	P19120	MULTI-MSMS	20140904-PurClathDigest-1ug-01	1	740.88	2	740.88079	1479.74703	24546.4	-3.8872	-0.0028799	-2.1703	-0.0016079	-6.0575	-0.0044879	740.879084620575	45.784	0.3295	45.784	45.67	46	0					25	10	4	0	0	0	0.013986	1	6582	92.856
ARFEELNADLFR	12	Unmodified	_ARFEELNADLFR_					0	0	0	1	P19120	P19120	P19120	MULTI-MSMS	20140904-PurClathDigest-1ug-01	1	494.25	3	494.256285	1479.74703	29885.38	-3.5427	-0.001751	-1.079	-0.00053331	-4.6217	-0.0022843	494.255706561538	45.782	0.36133	45.782	45.579	45.94	0					29	11	4	0	0	0	0.0090786	1	6589	78.324
ARFEELNADLFR	12	Unmodified	_ARFEELNADLFR_					0	0	0	1	P19120	P19120	P19120	MULTI-MSMS	20140904-PurClathDigest-1ug-02	2	494.25	3	494.256285	1479.74703	29959.37	-4.369	-0.0021594	-0.55511	-0.00027436	-4.9241	-0.0024338	494.255846874272	46.387	0.24683	46.387	46.261	46.508	0					22	7	4	0	0	0	0.014734	1	6180	74.392
ARFEELNADLFR	12	Unmodified	_ARFEELNADLFR_					0	0	0	1	P19120	P19120	P19120	MSMS	20140904-PurClathDigest-1ug-02	2	740.88	2	740.88079	1479.74703	NaN	NaN	NaN	NaN	NaN	NaN	NaN	NaN	46.39	1	46.39	45.89	46.89	0								0	0	0	1.4962E-43	1	6176	259.7
ARFEELNADLFR	12	Unmodified	_ARFEELNADLFR_					0	0	0	1	P19120	P19120	P19120	MSMS	20140904-PurClathDigest-1ug-03	3	740.88	2	740.88079	1479.74703	NaN	NaN	NaN	NaN	NaN	NaN	NaN	NaN	46.314	1	46.314	45.814	46.814	-3.8147E-06								0	0	0	7.6817E-44	1	5900	270.45
ARHDEYLEVTK	11	Unmodified	_ARHDEYLEVTK_					0	0	0	1	G3MYP5	G3MYP5	G3MYP5	MULTI-MSMS	20140904-PurClathDigest-1ug-01	1	454.23	3	454.233369	1359.67828	29966.94	-6.2026	-0.0028174	1.5312	0.00069553	-4.6714	-0.0021219	454.233930874242	34.296	0.29792	34.296	34.164	34.462	0					25	9	4	0	0	0	0.010145	1	3580	84.169
ARHDEYLEVTK	11	Unmodified	_ARHDEYLEVTK_					0	0	0	1	G3MYP5	G3MYP5	G3MYP5	MULTI-MSMS	20140904-PurClathDigest-1ug-02	2	454.23	3	454.233369	1359.67828	30779.19	-6.3281	-0.0028745	0.90408	0.00041066	-5.4241	-0.0024638	454.233769631535	34.646	0.36175	34.646	34.493	34.855	0					21	10	3	0	0	0	0.0029269	1	3312	105.66
ARHDEYLEVTK	11	Unmodified	_ARHDEYLEVTK_					0	0	0	1	G3MYP5	G3MYP5	G3MYP5	MULTI-MSMS	20140904-PurClathDigest-1ug-03	3	454.23	3	454.233369	1359.67828	31462.17	-6.4104	-0.0029118	1.5701	0.0007132	-4.8403	-0.0021986	454.234112736683	34.655	0.3955	34.655	34.384	34.779	0					22	11	4	0	0	0	2.3305E-05	1	3132	155.47
ARVDHGAEIITQSPGR	16	Unmodified	_ARVDHGAEIITQSPGR_					0	0	0	1	F1MEW3	F1MEW3	F1MEW3	MULTI-MSMS	20140904-PurClathDigest-1ug-01	1	569.63	3	569.635936	1705.88598	28001.97	-6.3714	-0.0036294	0.18687	0.00010645	-6.1845	-0.0035229	569.636471213671	34.271	0.4485	34.271	34.013	34.462	0					48	14	5	0	0	0	0.0020363	1	3589	94.922
ASAFALQEQPVVNAVIDDATK	21	Unmodified	_ASAFALQEQPVVNAVIDDATK_					0	0	0	0	P11179	P11179	P11179	MULTI-MSMS	20140904-PurClathDigest-1ug-03	3	1094.57	2	1094.06823	2186.12191	19323.46	-2.2907	-0.0025062	-0.41639	-0.00045555	-2.7071	-0.0029618	1094.56841147284	52.473	0.47592	52.473	52.203	52.679	0					41	13	4	0	0	0	0.0025703	1	7406	69.088
ASAFNSWFENAEEDLTDPVR	20	Unmodified	_ASAFNSWFENAEEDLTDPVR_					0	0	0	0	E1BFB0	E1BFB0	E1BFB0	MULTI-MSMS	20140904-PurClathDigest-1ug-01	1	1150.02	2	1149.5191	2297.02366	20014.41	-1.4629	-0.0016816	-0.37915	-0.00043584	-1.842	-0.0021174	1150.02055189236	56.435	0.43217	56.435	56.202	56.634	0					30	8	4	0	0	0	1.5151E-08	1	9291	136.49
ASAFNSWFENAEEDLTDPVR	20	Unmodified	_ASAFNSWFENAEEDLTDPVR_					0	0	0	0	E1BFB0	E1BFB0	E1BFB0	MULTI-MSMS	20140904-PurClathDigest-1ug-02	2	1150.02	2	1149.5191	2297.02366	20038.52	-1.9196	-0.0022066	-0.61125	-0.00070264	-2.5308	-0.0029092	1150.02050297566	56.703	0.35242	56.703	56.507	56.86	0					24	6	5	0	0	0	1E-05	1	8573	109.65
ASAFNSWFENAEEDLTDPVR	20	Unmodified	_ASAFNSWFENAEEDLTDPVR_					0	0	0	0	E1BFB0	E1BFB0	E1BFB0	MULTI-MSMS	20140904-PurClathDigest-1ug-03	3	1150.02	2	1149.5191	2297.02366	19763.25	-2.111	-0.0024267	-0.76912	-0.00088412	-2.8801	-0.0033108	1150.02034946231	56.669	0.45167	56.669	56.454	56.906	0					24	7	5	0	0	0	0.059097	1	8268	48.616
ASDKLDTVLEK	11	Unmodified	_ASDKLDTVLEK_					0	0	0	1	F1MEW3	F1MEW3	F1MEW3	MULTI-MSMS	20140904-PurClathDigest-1ug-01	1	609.83	2	609.832443	1217.65033	26785.9	-6.2559	-0.003815	-0.43879	-0.00026759	-6.6946	-0.0040826	609.832230355241	37.956	0.77825	37.956	37.646	38.425	0					56	24	5	0	0	0	2.2857E-06	2	4547	171.26
ASDKLDTVLEK	11	Unmodified	_ASDKLDTVLEK_					0	0	0	1	F1MEW3	F1MEW3	F1MEW3	MULTI-MSMS	20140904-PurClathDigest-1ug-02	2	609.83	2	609.832443	1217.65033	26550.93	-6.5797	-0.0040125	0.065489	3.9937E-05	-6.5143	-0.0039726	609.832442749358	38.254	0.91583	38.254	37.979	38.895	0					55	26	5	0	0	0	2.0447E-06	1	4134	174.72
ASDKLDTVLEK	11	Unmodified	_ASDKLDTVLEK_					0	0	0	1	F1MEW3	F1MEW3	F1MEW3	MULTI-MSMS	20140904-PurClathDigest-1ug-02	2	406.89	3	406.890721	1217.65033	32750.26	-6.4695	-0.0026324	0.62927	0.00025604	-5.8402	-0.0023763	406.891018756408	38.244	0.36575	38.244	38.043	38.409	0					24	10	3	0	0	0	0.0020781	1	4151	111.79
ASDKLDTVLEK	11	Unmodified	_ASDKLDTVLEK_					0	0	0	1	F1MEW3	F1MEW3	F1MEW3	MULTI-MSMS	20140904-PurClathDigest-1ug-03	3	609.83	2	609.832443	1217.65033	26732.97	-6.346	-0.00387	0.26493	0.00016156	-6.081	-0.0037084	609.832424137096	38.449	0.8975	38.449	38.179	39.076	3.8147E-06					49	24	4	0	0	0	4.1299E-09	1	3966	228.78
ASDKLDTVLEKSEEHADSK	19	Unmodified	_ASDKLDTVLEKSEEHADSK_					0	0	0	2	F1MEW3	F1MEW3	F1MEW3	MULTI-MSMS	20140904-PurClathDigest-1ug-01	1	526.51	4	526.261653	2101.01751	28552.18	-6.079	-0.0031991	0.065187	3.4305E-05	-6.0138	-0.0031648	526.5121765725	37.69	0.497	37.69	37.498	37.995	0					48	15	6	0	0	0	2.4549E-06	1	4434	142.43
ASDKLDTVLEKSEEHADSK	19	Unmodified	_ASDKLDTVLEKSEEHADSK_					0	0	0	2	F1MEW3	F1MEW3	F1MEW3	MULTI-MSMS	20140904-PurClathDigest-1ug-01	1	701.34	3	701.346446	2101.01751	24911.47	-6.0091	-0.0042145	-0.019976	-1.401E-05	-6.0291	-0.0042285	701.680966743798	37.691	0.37717	37.691	37.528	37.905	3.8147E-06					36	11	5	0	0	0	6.3542E-09	1	4446	174.19
ASDKLDTVLEKSEEHADSK	19	Unmodified	_ASDKLDTVLEKSEEHADSK_					0	0	0	2	F1MEW3	F1MEW3	F1MEW3	MULTI-MSMS	20140904-PurClathDigest-1ug-02	2	526.26	4	526.261653	2101.01751	28359	-5.1037	-0.0026859	0.50909	0.00026792	-4.5946	-0.002418	526.261813808029	37.922	0.34058	37.922	37.737	38.077	0					38	9	6	0	0	0	5.7946E-06	1	4068	141.31
ASDKLDTVLEKSEEHADSK	19	Unmodified	_ASDKLDTVLEKSEEHADSK_					0	0	0	2	F1MEW3	F1MEW3	F1MEW3	MULTI-MSMS	20140904-PurClathDigest-1ug-02	2	701.68	3	701.346446	2101.01751	25386.68	-5.1262	-0.0035953	0.16548	0.00011606	-4.9607	-0.0034792	701.680809437203	37.927	0.45108	37.927	37.701	38.152	0					39	12	6	0	0	0	6.3483E-09	1	4069	174.2
ASDKLDTVLEKSEEHADSK	19	Unmodified	_ASDKLDTVLEKSEEHADSK_					0	0	0	2	F1MEW3	F1MEW3	F1MEW3	MULTI-MSMS	20140904-PurClathDigest-1ug-03	3	526.26	4	526.261653	2101.01751	28760.84	-5.8451	-0.003076	0.025849	1.3603E-05	-5.8192	-0.0030624	526.512247459959	38.063	0.38033	38.063	37.882	38.262	0					34	9	5	0	0	0	1.9806E-06	1	3894	144.82
ASDKLDTVLEKSEEHADSK	19	Unmodified	_ASDKLDTVLEKSEEHADSK_					0	0	0	2	F1MEW3	F1MEW3	F1MEW3	MULTI-MSMS	20140904-PurClathDigest-1ug-03	3	701.68	3	701.346446	2101.01751	24993.45	-6.1326	-0.0043011	-0.006929	-4.8596E-06	-6.1396	-0.004306	701.680819784919	38.076	0.51858	38.076	37.882	38.4	0					43	13	6	0	0	0	8.2979E-09	1	3902	179.07
ASGPIDHYR	9	Unmodified	_ASGPIDHYR_					0	0	0	0	E1BKN2	E1BKN2	E1BKN2	MULTI-MSMS	20140904-PurClathDigest-1ug-01	1	339.17	3	339.170041	1014.48829	40192.4	-6.0558	-0.0020539	-1.2223	-0.00041457	-7.2781	-0.0024685	339.169896453814	33.227	0.43317	33.227	32.957	33.39	0					37	13	4	0	0	0	0.0013582	1	3294	113.18
ASGPIDHYR	9	Unmodified	_ASGPIDHYR_					0	0	0	0	E1BKN2	E1BKN2	E1BKN2	MULTI-MSMS	20140904-PurClathDigest-1ug-01	1	508.25	2	508.251423	1014.48829	23917.47	-6.4346	-0.0032704	-4.4547	-0.0022641	-10.889	-0.0055345	508.249803311584	33.253	0.27358	33.253	33.147	33.42	0					15	8	2	0	0	0	0.004283	1	3315	100.57
ASGPIDHYR	9	Unmodified	_ASGPIDHYR_					0	0	0	0	E1BKN2	E1BKN2	E1BKN2	MULTI-MSMS	20140904-PurClathDigest-1ug-02	2	339.17	3	339.170041	1014.48829	36543.04	-5.4536	-0.0018497	-1.0088	-0.00034216	-6.4624	-0.0021919	339.169951757345	33.461	0.46825	33.461	33.159	33.627	0					30	12	3	0	0	0	0.00019221	1	3024	128.36
ASGPIDHYR	9	Unmodified	_ASGPIDHYR_					0	0	0	0	E1BKN2	E1BKN2	E1BKN2	MULTI-MSMS	20140904-PurClathDigest-1ug-03	3	339.17	3	339.170041	1014.48829	36545.65	-5.6177	-0.0019054	-0.82119	-0.00027852	-6.4389	-0.0021839	339.169999607848	33.549	0.60917	33.549	33.232	33.841	0					33	16	4	0	0	0	0.0021061	1	2877	98.582
ASGPIDHYR	9	Unmodified	_ASGPIDHYR_					0	0	0	0	E1BKN2	E1BKN2	E1BKN2	MULTI-SECPEP	20140904-PurClathDigest-1ug-03	3	508.22	2	508.251423	1014.48829	30486.73	-5.9097	-0.0030036	-1.4162	-0.00071978	-7.3259	-0.0037234	508.251293466869	33.553	0.36567	33.553	33.378	33.744	0					24	9	4	0	0	0	0.045924	1	2864	70.439
ASISPMDEPVPDSESPIEK	19	Oxidation (M)	_ASISPM(ox)DEPVPDSESPIEK_		ASISPM(1)DEPVPDSESPIEK		ASISPM(91.59)DEPVPDSESPIEK	0	0	1	0	F1N1S2	F1N1S2	F1N1S2	MULTI-MSMS	20140904-PurClathDigest-1ug-02	2	1022.47	2	1022.47498	2042.93542	20831.28	-4.9349	-0.0050458	0.27988	0.00028617	-4.655	-0.0047596	1022.97646579264	40.357	0.62575	40.357	39.977	40.603	0					68	18	6	0	0	0	0.0027177	1	4640	91.589
ASISPMDEPVPDSESPIEK	19	Oxidation (M)	_ASISPM(ox)DEPVPDSESPIEK_		ASISPM(1)DEPVPDSESPIEK		ASISPM(97.27)DEPVPDSESPIEK	0	0	1	0	F1N1S2	F1N1S2	F1N1S2	MULTI-MSMS	20140904-PurClathDigest-1ug-03	3	1022.47	2	1022.47498	2042.93542	20924.14	-4.7877	-0.0048953	0.60599	0.00061961	-4.1818	-0.0042757	1022.9769964734	40.334	0.70375	40.334	39.925	40.629	0					70	20	6	0	0	0	0.0029503	1	4414	97.271
ASLAALPPLHVAK	13	Unmodified	_ASLAALPPLHVAK_					0	0	0	0	F1MIC9	F1MIC9	F1MIC9	MULTI-MSMS	20140904-PurClathDigest-1ug-02	2	644.39	2	644.392805	1286.77106	25812.89	-4.2791	-0.0027574	-0.49767	-0.00032069	-4.7767	-0.0030781	644.39263840544	42.552	0.34991	42.552	42.406	42.756	0					30	10	4	0	0	0	0.015914	1	5207	75.739
ASLAALPPLHVAK	13	Unmodified	_ASLAALPPLHVAK_					0	0	0	0	F1MIC9	F1MIC9	F1MIC9	MULTI-MSMS	20140904-PurClathDigest-1ug-03	3	644.39	2	644.392805	1286.77106	26044.89	-5.1435	-0.0033145	-0.076125	-4.9054E-05	-5.2197	-0.0033635	644.392533807909	42.692	0.36184	42.692	42.535	42.897	0					28	10	4	0	0	0	0.021357	1	4987	70.089
ASMLFDTMPHHLALNR	16	2 Oxidation (M)	_ASM(ox)LFDTM(ox)PHHLALNR_		ASM(1)LFDTM(1)PHHLALNR		ASM(49.59)LFDTM(49.59)PHHLALNR	0	0	2	0	F1N1S2	F1N1S2	F1N1S2	MULTI-MSMS	20140904-PurClathDigest-1ug-01	1	629.3	3	629.306434	1884.89747	18058.95	-4.8021	-0.003022	4.3951	0.0027659	-0.40701	-0.00025613	629.643624808371	39.798	0.36325	39.798	39.64	40.004	0					32	11	5	0	0	0	0.03457	1	4984	49.595
ASMLFDTMPHHLALNR	16	2 Oxidation (M)	_ASM(ox)LFDTM(ox)PHHLALNR_		ASM(1)LFDTM(1)PHHLALNR		ASM(82.53)LFDTM(82.53)PHHLALNR	0	0	2	0	F1N1S2	F1N1S2	F1N1S2	MULTI-MSMS	20140904-PurClathDigest-1ug-02	2	629.3	3	629.306434	1884.89747	20628.21	-4.1142	-0.0025891	3.2467	0.0020432	-0.86749	-0.00054592	629.64379337044	40.22	0.3985	40.22	40.043	40.441	0					22	11	4	0	0	0	0.0034619	1	4618	82.529
ASMLFDTMPHHLALNR	16	2 Oxidation (M)	_ASM(ox)LFDTM(ox)PHHLALNR_		ASM(1)LFDTM(1)PHHLALNR		ASM(86.5)LFDTM(86.5)PHHLALNR	0	0	2	0	F1N1S2	F1N1S2	F1N1S2	MULTI-MSMS	20140904-PurClathDigest-1ug-03	3	629.63	3	629.306434	1884.89747	22929.06	-4.0521	-0.00255	3.9944	0.0025137	-0.057722	-3.6325E-05	629.643769122963	40.247	0.36825	40.247	40.063	40.431	-3.8147E-06					19	10	3	0	0	0	0.0023408	1	4395	86.497
ASREEIHEYR	10	Unmodified	_ASREEIHEYR_					0	0	0	1	Q08DH7	Q08DH7	Q08DH7	MULTI-MSMS	20140904-PurClathDigest-1ug-01	1	430.54	3	430.545947	1288.61601	32124.66	-6.9341	-0.0029855	-0.047817	-2.0587E-05	-6.9819	-0.003006	430.545974477755	31.515	0.65892	31.515	31.342	32.001	0					44	20	3	0	0	0	3.7375E-05	1	2849	164.9
ASREEIHEYR	10	Unmodified	_ASREEIHEYR_					0	0	0	1	Q08DH7	Q08DH7	Q08DH7	MULTI-MSMS	20140904-PurClathDigest-1ug-01	1	645.31	2	645.315283	1288.61601	26020.92	-6.7846	-0.0043782	-0.41244	-0.00026616	-7.1971	-0.0046444	645.31512268083	31.511	0.33992	31.511	31.373	31.713	0					24	10	3	0	0	0	3.7381E-05	1	2857	183.03
ASREEIHEYR	10	Unmodified	_ASREEIHEYR_					0	0	0	1	Q08DH7	Q08DH7	Q08DH7	MULTI-MSMS	20140904-PurClathDigest-1ug-02	2	430.54	3	430.545947	1288.61601	31762.84	-6.6878	-0.0028794	-0.433	-0.00018643	-7.1208	-0.0030658	430.545800118406	31.506	0.95817	31.506	30.909	31.867	0					80	26	8	0	0	0	8.016E-08	1	2574	226.93
ASREEIHEYR	10	Unmodified	_ASREEIHEYR_					0	0	0	1	Q08DH7	Q08DH7	Q08DH7	MULTI-MSMS	20140904-PurClathDigest-1ug-02	2	645.31	2	645.315283	1288.61601	25816.34	-6.0948	-0.0039331	-1.1236	-0.0007251	-7.2185	-0.0046582	645.314538483388	31.477	0.61417	31.477	31.084	31.698	-1.9073E-06					49	16	5	0	0	0	1.7503E-05	1	2583	185.99
ASREEIHEYR	10	Unmodified	_ASREEIHEYR_					0	0	0	1	Q08DH7	Q08DH7	Q08DH7	MULTI-MSMS	20140904-PurClathDigest-1ug-03	3	430.54	3	430.545947	1288.61601	32100.82	-6.1959	-0.0026676	-0.47627	-0.00020505	-6.6722	-0.0028727	430.545735522452	31.549	0.79592	31.549	31.148	31.944	1.9073E-06					73	20	7	0	0	0	3.3794E-05	1	2434	168.68
ASREEIHEYR	10	Unmodified	_ASREEIHEYR_					0	0	0	1	Q08DH7	Q08DH7	Q08DH7	MULTI-MSMS	20140904-PurClathDigest-1ug-03	3	645.31	2	645.315283	1288.61601	25880.85	-5.7513	-0.0037114	-1.131	-0.00072987	-6.8823	-0.0044413	645.314706113051	31.514	0.65842	31.514	31.107	31.766	1.9073E-06					50	16	6	0	0	0	8.1795E-06	1	2446	222.18
ASREEIHEYRR	11	Unmodified	_ASREEIHEYRR_					0	0	0	2	Q08DH7	Q08DH7	Q08DH7	MULTI-MSMS	20140904-PurClathDigest-1ug-01	1	482.58	3	482.579651	1444.71712	30441.04	-6.2519	-0.003017	-0.18794	-9.0696E-05	-6.4398	-0.0031077	482.579609578139	30.848	0.73575	30.848	30.698	31.434	0					66	22	5	0	0	0	0.0013034	1	2683	130.56
ASREEIHEYRR	11	Unmodified	_ASREEIHEYRR_					0	0	0	2	Q08DH7	Q08DH7	Q08DH7	MULTI-MSMS	20140904-PurClathDigest-1ug-01	1	362.18	4	362.186557	1444.71712	34268.44	-6.095	-0.0022075	0.61242	0.00022181	-5.4826	-0.0019857	362.18690071594	30.845	0.64425	30.845	30.698	31.342	0					63	19	5	0	0	0	0.0021534	1	2684	119.39
ASREEIHEYRR	11	Unmodified	_ASREEIHEYRR_					0	0	0	2	Q08DH7	Q08DH7	Q08DH7	MULTI-MSMS	20140904-PurClathDigest-1ug-02	2	362.18	4	362.186557	1444.71712	34619.54	-5.2617	-0.0019057	0.50668	0.00018351	-4.755	-0.0017222	362.186820572767	30.786	0.70883	30.786	30.646	31.355	0					54	19	5	0	0	0	0.0031156	1	2413	116.24
ASREEIHEYRR	11	Unmodified	_ASREEIHEYRR_					0	0	0	2	Q08DH7	Q08DH7	Q08DH7	MULTI-MSMS	20140904-PurClathDigest-1ug-02	2	482.58	3	482.579651	1444.71712	30385.09	-5.3517	-0.0025826	-0.50325	-0.00024286	-5.8549	-0.0028255	482.579465845997	30.777	0.42775	30.777	30.55	30.978	0					40	12	5	0	0	0	0.0043181	1	2421	113.24
ASREEIHEYRR	11	Unmodified	_ASREEIHEYRR_					0	0	0	2	Q08DH7	Q08DH7	Q08DH7	MULTI-MSMS	20140904-PurClathDigest-1ug-03	3	362.18	4	362.186557	1444.71712	34645.23	-4.4362	-0.0016067	0.23621	8.5551E-05	-4.2	-0.0015212	362.186728557509	30.805	0.72792	30.805	30.673	31.401	-1.9073E-06					57	18	6	0	0	0	0.00262	1	2281	117.86
ASREEIHEYRR	11	Unmodified	_ASREEIHEYRR_					0	0	0	2	Q08DH7	Q08DH7	Q08DH7	MULTI-MSMS	20140904-PurClathDigest-1ug-03	3	482.58	3	482.579651	1444.71712	30382.06	-4.6353	-0.0022369	-0.6205	-0.00029944	-5.2558	-0.0025363	482.579391278365	30.798	0.576	30.798	30.572	31.148	0					45	15	5	0	0	0	0.0010452	1	2282	134.18
ASYYVVSGNDPANGEPSR	18	Unmodified	_ASYYVVSGNDPANGEPSR_					0	0	0	0	F1N3M8;G3MYP5	F1N3M8;G3MYP5	G3MYP5	MSMS	20140904-PurClathDigest-1ug-01	1	941.93	2	941.931936	1881.84932	NaN	NaN	NaN	NaN	NaN	NaN	NaN	NaN	39.125	1	39.125	38.625	39.625	0								0	0	0	0.0036268	1	4819	62.94
ASYYVVSGNDPANGEPSR	18	Unmodified	_ASYYVVSGNDPANGEPSR_					0	0	0	0	F1N3M8;G3MYP5	F1N3M8;G3MYP5	G3MYP5	MSMS	20140904-PurClathDigest-1ug-03	3	941.92	2	941.931936	1881.84932	NaN	NaN	NaN	NaN	NaN	NaN	NaN	NaN	39.482	1	39.482	38.982	39.982	0								0	0	0	0.0038473	1	4222	60.062
ATAGDTHLGGEDFDNR	16	Unmodified	_ATAGDTHLGGEDFDNR_					0	0	0	0	Q27975;Q27965;P0CB32	Q27975	Q27975	MULTI-MSMS	20140904-PurClathDigest-1ug-01	1	838.36	2	838.368972	1674.72339	24272.76	-5.0148	-0.0042042	-1.3899	-0.0011653	-6.4047	-0.0053695	838.368212416251	36.976	0.24942	36.976	36.849	37.099	-3.8147E-06					29	7	5	0	0	0	3.3966E-13	1	4251	220.59
ATAGDTHLGGEDFDNR	16	Unmodified	_ATAGDTHLGGEDFDNR_					0	0	0	0	Q27975;Q27965;P0CB32	Q27975	Q27975	MULTI-MSMS	20140904-PurClathDigest-1ug-01	1	559.25	3	559.248407	1674.72339	28433.29	-5.0965	-0.0028502	-0.45362	-0.00025368	-5.5501	-0.0031039	559.248247851188	36.98	0.3725	36.98	36.818	37.191	3.8147E-06					38	11	6	0	0	0	9.4261E-05	1	4257	103.6
ATAGDTHLGGEDFDNR	16	Unmodified	_ATAGDTHLGGEDFDNR_					0	0	0	0	Q27975;Q27965;P0CB32	Q27975	Q27975	MULTI-MSMS	20140904-PurClathDigest-1ug-02	2	838.36	2	838.368972	1674.72339	23927.81	-4.9887	-0.0041824	-0.91922	-0.00077065	-5.9079	-0.004953	838.368701431568	37.108	0.34266	37.108	36.951	37.293	0					28	9	4	0	0	0	4.5312E-17	1	3876	224.59
ATAGDTHLGGEDFDNR	16	Unmodified	_ATAGDTHLGGEDFDNR_					0	0	0	0	Q27975;Q27965;P0CB32	Q27975	Q27975	MULTI-MSMS	20140904-PurClathDigest-1ug-02	2	559.25	3	559.248407	1674.72339	28386.54	-4.9142	-0.0027483	0.19584	0.00010952	-4.7184	-0.0026387	559.24851932356	37.1	0.44183	37.1	36.884	37.326	0					36	12	5	0	0	0	1.7054E-05	1	3877	119.54
ATAGDTHLGGEDFDNR	16	Unmodified	_ATAGDTHLGGEDFDNR_					0	0	0	0	Q27975;Q27965;P0CB32	Q27975	Q27975	MULTI-MSMS	20140904-PurClathDigest-1ug-03	3	559.25	3	559.248407	1674.72339	28245.88	-5.2918	-0.0029594	0.26551	0.00014849	-5.0263	-0.0028109	559.248458149022	37.066	0.3305	37.066	36.893	37.223	0					26	8	4	0	0	0	2.4392E-05	1	3675	113.47
ATAGDTHLGGEDFDNR	16	Unmodified	_ATAGDTHLGGEDFDNR_					0	0	0	0	Q27975;Q27965;P0CB32	Q27975	Q27975	MULTI-MSMS	20140904-PurClathDigest-1ug-03	3	838.36	2	838.368972	1674.72339	23850.53	-5.5399	-0.0046445	-0.66695	-0.00055915	-6.2068	-0.0052036	838.368842223	37.074	0.36559	37.074	36.893	37.258	-3.8147E-06					31	9	5	0	0	0	7.6535E-13	1	3682	201.3
ATLEMVNHEK	10	Oxidation (M)	_ATLEM(ox)VNHEK_		ATLEM(1)VNHEK		ATLEM(118.23)VNHEK	0	0	1	0	F1MDZ2;O77788	F1MDZ2	F1MDZ2	MULTI-MSMS	20140904-PurClathDigest-1ug-01	1	594.29	2	594.289888	1186.56522	27193.81	-7.3205	-0.0043505	-1.7765	-0.0010558	-9.097	-0.0054062	594.288678619203	31.788	0.47383	31.788	31.558	32.032	1.9073E-06					65	14	6	0	0	0	0.010382	1	2901	118.23
ATLEMVNHEK	10	Oxidation (M)	_ATLEM(ox)VNHEK_		ATLEM(1)VNHEK		ATLEM(107.08)VNHEK	0	0	1	0	F1MDZ2;O77788	F1MDZ2	F1MDZ2	MULTI-MSMS	20140904-PurClathDigest-1ug-01	1	396.53	3	396.529017	1186.56522	32973.88	-7.3799	-0.0029264	0.79493	0.00031521	-6.585	-0.0026111	396.52947441379	31.787	0.53358	31.787	31.558	32.092	0					55	16	5	0	0	0	0.0019578	2	2904	107.08
ATLEMVNHEK	10	Oxidation (M)	_ATLEM(ox)VNHEK_		ATLEM(1)VNHEK		ATLEM(157.14)VNHEK	0	0	1	0	F1MDZ2;O77788	F1MDZ2	F1MDZ2	MULTI-MSMS	20140904-PurClathDigest-1ug-02	2	594.29	2	594.289888	1186.56522	27193.19	-7.2967	-0.0043364	-0.36655	-0.00021784	-7.6633	-0.0045542	594.289921527173	31.77	0.56533	31.77	31.524	32.089	-1.9073E-06					45	15	5	0	0	0	0.0003581	1	2630	157.14
ATLEMVNHEK	10	Oxidation (M)	_ATLEM(ox)VNHEK_		ATLEM(1)VNHEK		ATLEM(104.22)VNHEK	0	0	1	0	F1MDZ2;O77788	F1MDZ2	F1MDZ2	MULTI-MSMS	20140904-PurClathDigest-1ug-02	2	396.53	3	396.529017	1186.56522	33057.43	-7.3119	-0.0028994	0.64909	0.00025738	-6.6628	-0.002642	396.52937244941	31.834	0.52708	31.834	31.596	32.123	3.8147E-06					58	14	5	0	0	0	0.002174	2	2690	104.22
ATLEMVNHEK	10	Oxidation (M)	_ATLEM(ox)VNHEK_		ATLEM(1)VNHEK		ATLEM(134.84)VNHEK	0	0	1	0	F1MDZ2;O77788	F1MDZ2	F1MDZ2	MULTI-MSMS	20140904-PurClathDigest-1ug-03	3	594.29	2	594.289888	1186.56522	26846.94	-7.6263	-0.0045323	-0.55135	-0.00032766	-8.1777	-0.0048599	594.289874336661	31.857	0.59733	31.857	31.66	32.257	1.9073E-06					45	15	6	0	0	0	0.00077874	1	2492	134.84
ATLEMVNHEK	10	Oxidation (M)	_ATLEM(ox)VNHEK_		ATLEM(1)VNHEK		ATLEM(99.97)VNHEK	0	0	1	0	F1MDZ2;O77788	F1MDZ2	F1MDZ2	MULTI-MSMS	20140904-PurClathDigest-1ug-03	3	396.53	3	396.529017	1186.56522	33268.68	-7.6472	-0.0030324	0.63562	0.00025204	-7.0116	-0.0027803	396.529384754495	31.904	0.5285	31.904	31.66	32.188	0					51	13	5	0	0	0	0.0036854	2	2560	99.973
ATNSSWVVVFK	11	Unmodified	_ATNSSWVVVFK_					0	0	0	0	F1MGT4	F1MGT4	F1MGT4	MULTI-MSMS	20140904-PurClathDigest-1ug-02	2	619.33	2	619.332413	1236.65027	25978.14	-3.3425	-0.0020701	0.4279	0.00026501	-2.9146	-0.0018051	619.332872642264	48.582	0.45266	48.582	48.373	48.826	0					22	13	2	0	0	0	0.0066339	1	6727	96.113
ATNSSWVVVFK	11	Unmodified	_ATNSSWVVVFK_					0	0	0	0	F1MGT4	F1MGT4	F1MGT4	MULTI-MSMS	20140904-PurClathDigest-1ug-03	3	619.33	2	619.332413	1236.65027	25626.8	-3.7238	-0.0023063	0.72329	0.00044796	-3.0005	-0.0018583	619.332868506962	48.68	0.48941	48.68	48.479	48.969	0					21	13	2	0	0	0	0.008041	1	6482	91.549
ATVLQNQLDESQQER	15	Unmodified	_ATVLQNQLDESQQER_					0	0	0	0	Q2KJ21;F1N037	Q2KJ21	Q2KJ21	MULTI-MSMS	20140904-PurClathDigest-1ug-01	1	879.93	2	879.934479	1757.8544	22132.91	-4.8489	-0.0042667	-0.32323	-0.00028442	-5.1722	-0.0045512	879.934052236441	39.837	0.27325	39.837	39.671	39.944	0					25	8	4	0	0	0	2.9586E-29	1	5003	273.61
ATVLQNQLDESQQER	15	Unmodified	_ATVLQNQLDESQQER_					0	0	0	0	Q2KJ21;F1N037	Q2KJ21	Q2KJ21	MULTI-MSMS	20140904-PurClathDigest-1ug-02	2	879.93	2	879.934479	1757.8544	22368.27	-4.1551	-0.0036562	-0.52081	-0.00045828	-4.6759	-0.0041145	879.934038985707	40.247	0.39958	40.247	39.977	40.377	0					33	11	5	0	0	0	2.422E-16	1	4627	216.15
ATVLQNQLDESQQER	15	Unmodified	_ATVLQNQLDESQQER_					0	0	0	0	Q2KJ21;F1N037	Q2KJ21	Q2KJ21	MULTI-MSMS	20140904-PurClathDigest-1ug-03	3	879.93	2	879.934479	1757.8544	22347.41	-4.3132	-0.0037953	-0.24828	-0.00021847	-4.5614	-0.0040138	879.934106618401	40.273	0.3015	40.273	40.097	40.398	0					25	8	5	0	0	0	1.5103E-16	1	4405	214.45
AVDDLNLHSYSNLPIWVSK	19	Unmodified	_AVDDLNLHSYSNLPIWVSK_					0	0	0	0	E1BDX8	E1BDX8	E1BDX8	MULTI-MSMS	20140904-PurClathDigest-1ug-02	2	724.71	3	724.375899	2170.10587	24611.43	-2.4976	-0.0018092	0.75531	0.00054713	-1.7423	-0.0012621	724.710636530038	49.948	0.41917	49.948	49.69	50.11	0					32	12	5	0	0	0	0.058217	1	7056	29.172
AVDVFFPPEAQNDFPVAMQISEKHDVVFLITK	32	Unmodified	_AVDVFFPPEAQNDFPVAMQISEKHDVVFLITK_					0	0	0	1	P49951;F1MPU0	P49951	P49951	MULTI-MSMS	20140904-PurClathDigest-1ug-02	2	909.22	4	908.718087	3630.84324	22169.05	-2.3037	-0.0020934	-0.97388	-0.00088499	-3.2775	-0.0029784	909.218584902048	54.503	1.1212	54.503	54.073	55.195	0					153	30	7	0	0	0	0.055343	2	8206	25.239
AVEQKEEAVLEK	12	Unmodified	_AVEQKEEAVLEK_					0	0	0	1	F1N3M8;G3MYP5	F1N3M8;G3MYP5	G3MYP5	MULTI-MSMS	20140904-PurClathDigest-1ug-01	1	458.25	3	458.248796	1371.72456	30027.4	-6.2072	-0.0028445	-0.1323	-6.0624E-05	-6.3395	-0.0029051	458.248459295421	34.227	0.205	34.227	34.106	34.311	0					25	6	5	0	0	0	0.036942	1	3560	63.662
AVEQKEEAVLEK	12	Unmodified	_AVEQKEEAVLEK_					0	0	0	1	F1N3M8;G3MYP5	F1N3M8;G3MYP5	G3MYP5	MULTI-MSMS	20140904-PurClathDigest-1ug-02	2	458.25	3	458.248796	1371.72456	30147.46	-6.4498	-0.0029556	-0.043947	-2.0139E-05	-6.4937	-0.0029757	458.24867383024	34.564	0.22517	34.564	34.43	34.655	3.8147E-06					26	6	5	0	0	0	0.0053803	1	3282	94.122
AVEQKEEAVLEK	12	Unmodified	_AVEQKEEAVLEK_					0	0	0	1	F1N3M8;G3MYP5	F1N3M8;G3MYP5	G3MYP5	MULTI-MSMS	20140904-PurClathDigest-1ug-03	3	458.25	3	458.248796	1371.72456	29397.14	-6.3692	-0.0029187	-0.30639	-0.0001404	-6.6756	-0.0030591	458.248403950281	34.578	0.30033	34.578	34.384	34.684	0					27	8	5	0	0	0	0.00020055	1	3105	105.65
AVFPSIVGRPR	11	Unmodified	_AVFPSIVGRPR_					0	0	0	1	P63258;P60712;F1MRD0	P63258	P63258	MULTI-MSMS	20140904-PurClathDigest-1ug-01	1	400.24	3	400.240018	1197.69823	32936.76	-5.0606	-0.0020255	0.47135	0.00018865	-4.5893	-0.0018368	400.240154370334	41.379	0.55	41.379	41.049	41.599	0					54	17	4	0	0	0	0.0016068	1	5392	118.71
AVFPSIVGRPR	11	Unmodified	_AVFPSIVGRPR_					0	0	0	1	P63258;P60712;F1MRD0	P63258	P63258	MULTI-MSMS	20140904-PurClathDigest-1ug-02	2	400.24	3	400.240018	1197.69823	32664.85	-5.0828	-0.0020343	0.54008	0.00021616	-4.5427	-0.0018182	400.240132048279	41.696	0.62225	41.696	41.34	41.962	0					50	18	4	0	0	0	0.0028876	1	4983	109.66
AVFPSIVGRPR	11	Unmodified	_AVFPSIVGRPR_					0	0	0	1	P63258;P60712;F1MRD0	P63258	P63258	MULTI-MSMS	20140904-PurClathDigest-1ug-02	2	599.85	2	599.85639	1197.69823	26616.51	-5.1295	-0.003077	0.077892	4.6724E-05	-5.0516	-0.0030302	599.856477002135	41.693	0.45859	41.693	41.406	41.864	0					38	13	4	0	0	0	0.00032122	1	4990	138.25
AVFPSIVGRPR	11	Unmodified	_AVFPSIVGRPR_					0	0	0	1	P63258;P60712;F1MRD0	P63258	P63258	MULTI-MSMS	20140904-PurClathDigest-1ug-03	3	400.24	3	400.240018	1197.69823	33583.15	-5.3791	-0.0021529	0.50057	0.00020035	-4.8785	-0.0019526	400.240146459512	41.706	0.56225	41.706	41.368	41.931	0					46	16	4	0	0	0	0.00073268	1	4755	130.66
AVFPSIVGRPR	11	Unmodified	_AVFPSIVGRPR_					0	0	0	1	P63258;P60712;F1MRD0	P63258	P63258	MULTI-MSMS	20140904-PurClathDigest-1ug-03	3	599.85	2	599.85639	1197.69823	27253.81	-5.5674	-0.0033396	0.028652	1.7187E-05	-5.5388	-0.0033225	599.856477516042	41.717	0.35875	41.717	41.502	41.861	0					32	10	4	0	0	0	3.5107E-05	1	4762	160.77
AVFVDLEPTVIDEVR	15	Unmodified	_AVFVDLEPTVIDEVR_					0	0	0	0	Q2HJ86;F2Z4C1;Q3ZCJ7;F1MNF8	Q2HJ86	Q2HJ86	MULTI-MSMS	20140904-PurClathDigest-1ug-01	1	851.96	2	851.456527	1700.8985	22617.38	-1.8373	-0.0015644	0.54258	0.00046198	-1.2947	-0.0011024	851.457073571701	51.26	0.54641	51.26	51.028	51.574	-3.8147E-06					66	16	6	0	0	0	9.8944E-05	1	7989	107.35
AVFVDLEPTVIDEVR	15	Unmodified	_AVFVDLEPTVIDEVR_					0	0	0	0	Q2HJ86;F2Z4C1;Q3ZCJ7;F1MNF8	Q2HJ86	Q2HJ86	MULTI-MSMS	20140904-PurClathDigest-1ug-02	2	851.46	2	851.456527	1700.8985	22601.98	-2.0125	-0.0017135	0.48723	0.00041486	-1.5252	-0.0012987	851.456956648654	51.442	0.41242	51.442	51.245	51.658	0					49	12	6	0	0	0	4.115E-06	1	7406	131.96
AVFVDLEPTVIDEVR	15	Unmodified	_AVFVDLEPTVIDEVR_					0	0	0	0	Q2HJ86;F2Z4C1;Q3ZCJ7;F1MNF8	Q2HJ86	Q2HJ86	MULTI-MSMS	20140904-PurClathDigest-1ug-03	3	851.46	2	851.456527	1700.8985	22579.73	-1.9291	-0.0016425	0.5787	0.00049274	-1.3504	-0.0011498	851.456886024777	51.546	0.45366	51.546	51.339	51.792	0					49	13	6	0	0	0	3.6411E-06	1	7160	132.08
AVLDALLEGK	10	Unmodified	_AVLDALLEGK_					0	0	0	0	F1N3M8;G3MYP5;F1N1S2	F1N3M8;G3MYP5;F1N1S2	G3MYP5	MULTI-MSMS	20140904-PurClathDigest-1ug-01	1	514.8	2	514.802957	1027.59136	29274.46	-3.1107	-0.0016014	0.29261	0.00015064	-2.8181	-0.0014508	514.803128211891	48.694	1.0332	48.694	48.454	49.487	3.8147E-06					81	33	5	0	0	0	0.03149	1	7328	81.017
AVLDALLEGK	10	Unmodified	_AVLDALLEGK_					0	0	0	0	F1N3M8;G3MYP5;F1N1S2	F1N3M8;G3MYP5;F1N1S2	G3MYP5	MULTI-MSMS	20140904-PurClathDigest-1ug-02	2	514.8	2	514.802957	1027.59136	29419.88	-3.102	-0.0015969	0.373	0.00019202	-2.729	-0.0014049	514.803162538381	48.978	0.82291	48.978	48.76	49.583	0					67	23	5	0	0	0	0.0037114	1	6804	112.13
AVLDALLEGK	10	Unmodified	_AVLDALLEGK_					0	0	0	0	F1N3M8;G3MYP5;F1N1S2	F1N3M8;G3MYP5;F1N1S2	G3MYP5	MULTI-MSMS	20140904-PurClathDigest-1ug-03	3	514.8	2	514.802957	1027.59136	29420.43	-3.2036	-0.0016492	0.58545	0.00030139	-2.6181	-0.0013478	514.803301180703	49.105	1.0189	49.105	48.861	49.88	3.8147E-06					74	29	4	0	0	0	0.011536	1	6552	93.096
AVNYFSK	7	Unmodified	_AVNYFSK_					0	0	0	0	P49951;F1MPU0	P49951	P49951	MULTI-MSMS	20140904-PurClathDigest-1ug-01	1	414.71	2	414.716153	827.417754	32519.82	-5.0242	-0.0020836	-0.13527	-5.6098E-05	-5.1594	-0.0021397	414.716064734762	36.965	0.497	36.965	36.754	37.251	0					44	15	5	0	0	0	0.0072538	1	4237	117.16
AVNYFSK	7	Unmodified	_AVNYFSK_					0	0	0	0	P49951;F1MPU0	P49951	P49951	MULTI-MSMS	20140904-PurClathDigest-1ug-01	1	414.71	2	414.716153	827.417754	32871.38	-5.9704	-0.002476	-0.50715	-0.00021032	-6.4776	-0.0026864	414.716154253021	38.177	2.9298	38.177	37.835	40.765	0					204	95	5	0	0	0	0.0046302	5	4513	139.31
AVNYFSK	7	Unmodified	_AVNYFSK_					0	0	0	0	P49951;F1MPU0	P49951	P49951	MULTI-MSMS	20140904-PurClathDigest-1ug-02	2	414.71	2	414.716153	827.417754	32823.28	-4.7888	-0.001986	0.095842	3.9747E-05	-4.6929	-0.0019462	414.716147731613	37.217	0.64358	37.217	37.024	37.668	0					39	18	4	0	0	0	0.0072538	1	3892	117.16
AVNYFSK	7	Unmodified	_AVNYFSK_					0	0	0	0	P49951;F1MPU0	P49951	P49951	MULTI-MSMS	20140904-PurClathDigest-1ug-02	2	414.71	2	414.716153	827.417754	32887.44	-5.8897	-0.0024426	-0.91816	-0.00038078	-6.8079	-0.0028233	414.716051804216	38.51	2.3876	38.51	38.184	40.572	3.8147E-06					171	71	5	0	0	0	0.0072538	4	4162	117.16
AVNYFSK	7	Unmodified	_AVNYFSK_					0	0	0	0	P49951;F1MPU0	P49951	P49951	MULTI-MSMS	20140904-PurClathDigest-1ug-03	3	414.71	2	414.716153	827.417754	32765.03	-4.9637	-0.0020585	0.36874	0.00015292	-4.595	-0.0019056	414.716249178605	37.198	0.81142	37.198	36.927	37.739	-3.8147E-06					44	21	4	0	0	0	0.0075511	1	3690	109.01
AVNYFSK	7	Unmodified	_AVNYFSK_					0	0	0	0	P49951;F1MPU0	P49951	P49951	MULTI-MSMS	20140904-PurClathDigest-1ug-03	3	414.71	2	414.716153	827.417754	32727.93	-5.5152	-0.0022872	-0.92444	-0.00038338	-6.4396	-0.0026706	414.716049390369	38.646	2.5336	38.646	38.262	40.795	0					167	73	5	0	0	0	0.0072538	3	3976	117.16
AVNYFSK	7	Deamidation (NQ)	_AVN(de)YFSK_	AVN(1)YFSK		AVN(101.64)YFSK		0	1	0	0	P49951;F1MPU0	P49951	P49951	MSMS	20140904-PurClathDigest-1ug-01	1	415.21	2	415.208161	828.401769	NaN	NaN	NaN	NaN	NaN	NaN	NaN	NaN	39.006	1	39.006	38.506	39.506	3.8147E-06								0	0	0	0.006355	1	4788	101.64
AVNYFSK	7	Deamidation (NQ)	_AVN(de)YFSK_	AVN(1)YFSK		AVN(104.21)YFSK		0	1	0	0	P49951;F1MPU0	P49951	P49951	MSMS	20140904-PurClathDigest-1ug-03	3	415.21	2	415.208161	828.401769	NaN	NaN	NaN	NaN	NaN	NaN	NaN	NaN	39.575	1	39.575	39.075	40.075	0								0	0	0	0.0056306	1	4241	104.21
AYEFAER	7	Unmodified	_AYEFAER_					0	0	0	0	P49951;F1MPU0	P49951	P49951	MULTI-MSMS	20140904-PurClathDigest-1ug-01	1	443.21	2	443.208692	884.402832	31351.16	-6.158	-0.0027293	-0.83947	-0.00037206	-6.9975	-0.0031014	443.208467633837	37.891	1.4072	37.891	37.467	38.875	0					175	45	6	0	0	0	0.0040969	4	4578	142.64
AYEFAER	7	Unmodified	_AYEFAER_					0	0	0	0	P49951;F1MPU0	P49951	P49951	MULTI-MSMS	20140904-PurClathDigest-1ug-02	2	443.21	2	443.208692	884.402832	31250.62	-5.9402	-0.0026328	-0.75786	-0.00033589	-6.6981	-0.0029687	443.208517075016	38.172	2.3702	38.172	37.843	40.213	0					178	70	6	0	0	0	0.002582	5	4274	158.08
AYEFAER	7	Unmodified	_AYEFAER_					0	0	0	0	P49951;F1MPU0	P49951	P49951	MULTI-MSMS	20140904-PurClathDigest-1ug-03	3	443.21	2	443.208692	884.402832	31065.29	-5.9563	-0.0026399	-0.89284	-0.00039572	-6.8492	-0.0030356	443.208467457238	38.259	2.4107	38.259	37.954	40.365	0					196	68	6	0	0	0	0.003823	4	4026	145.04
DADETKEWIEEK	12	Unmodified	_DADETKEWIEEK_					0	0	0	1	E1BFB0	E1BFB0	E1BFB0	MULTI-MSMS	20140904-PurClathDigest-1ug-01	1	746.84	2	746.843736	1491.67292	24119.62	-5.0067	-0.0037392	0.55515	0.00041461	-4.4515	-0.0033246	746.843998964058	39.914	0.33558	39.914	39.76	40.096	0					29	10	4	0	0	0	8.4186E-10	1	5028	235.73
DADETKEWIEEK	12	Unmodified	_DADETKEWIEEK_					0	0	0	1	E1BFB0	E1BFB0	E1BFB0	MULTI-MSMS	20140904-PurClathDigest-1ug-02	2	746.84	2	746.843736	1491.67292	24930.57	-4.6573	-0.0034783	-0.48461	-0.00036193	-5.1419	-0.0038402	746.843286328507	40.341	0.39616	40.341	40.111	40.507	0					28	11	4	0	0	0	1.0952E-09	1	4654	233.59
DADETKEWIEEK	12	Unmodified	_DADETKEWIEEK_					0	0	0	1	E1BFB0	E1BFB0	E1BFB0	MULTI-MSMS	20140904-PurClathDigest-1ug-03	3	746.84	2	746.843736	1491.67292	24918.69	-5.027	-0.0037544	0.49588	0.00037035	-4.5311	-0.003384	746.843697798456	40.357	0.33517	40.357	40.228	40.563	0					21	9	4	0	0	0	9.4933E-10	1	4421	247.14
DAEAWFNEK	9	Unmodified	_DAEAWFNEK_					0	0	0	0	CON__P13645;P06394;A6QNZ7;Q148H6;CON__Q148H6;CON__Q7Z3Y7;Q0P5J4;CON__Q7Z3Z0;CON__Q7Z3Y8;Q0P5J6	CON__P13645	CON__P13645	MULTI-MSMS	20140904-PurClathDigest-1ug-01	1	555.25	2	555.248546	1108.48254	28475.52	-4.1567	-0.002308	0.68025	0.00037771	-3.4764	-0.0019303	555.248642078142	44.805	0.36141	44.805	44.626	44.988	0					32	11	4	0	0	0	0.007916	1	6307	98.055
DAEAWFNEK	9	Unmodified	_DAEAWFNEK_					0	0	0	0	CON__P13645;P06394;A6QNZ7;Q148H6;CON__Q148H6;CON__Q7Z3Y7;Q0P5J4;CON__Q7Z3Z0;CON__Q7Z3Y8;Q0P5J6	CON__P13645	CON__P13645	MULTI-MSMS	20140904-PurClathDigest-1ug-02	2	555.25	2	555.248546	1108.48254	28167.52	-3.9869	-0.0022137	1.0483	0.00058204	-2.9386	-0.0016317	555.249112288176	45.273	0.41734	45.273	45.106	45.523	0					37	12	4	0	0	0	0.0043025	1	5868	108.57
DAEAWFNEK	9	Unmodified	_DAEAWFNEK_					0	0	0	0	CON__P13645;P06394;A6QNZ7;Q148H6;CON__Q148H6;CON__Q7Z3Y7;Q0P5J4;CON__Q7Z3Z0;CON__Q7Z3Y8;Q0P5J6	CON__P13645	CON__P13645	MULTI-MSMS	20140904-PurClathDigest-1ug-03	3	555.25	2	555.248546	1108.48254	28570.57	-4.0357	-0.0022408	0.90969	0.00050511	-3.126	-0.0017357	555.249009749659	45.293	0.4135	45.293	45.121	45.535	0					33	12	4	0	0	0	0.00050018	1	5627	109.44
DAGTIAGLNVLR	12	Unmodified	_DAGTIAGLNVLR_					0	0	0	0	P19120	P19120	P19120	MULTI-MSMS	20140904-PurClathDigest-1ug-03	3	600.34	2	600.340769	1198.66699	27760.82	-4.4254	-0.0026567	0.85856	0.00051543	-3.5668	-0.0021413	600.341180324017	47.113	0.35425	47.113	46.965	47.319	0					26	10	4	0	0	0	0.029719	1	6096	70.195
DAGVIAGLNVLR	12	Unmodified	_DAGVIAGLNVLR_					0	0	0	0	Q27975;Q27965;P0CB32	Q27975	Q27975	MULTI-MSMS	20140904-PurClathDigest-1ug-01	1	599.35	2	599.351137	1196.68772	27524.08	-2.4842	-0.0014889	0.097255	5.829E-05	-2.3869	-0.0014306	599.351111000202	49.065	0.39734	49.065	48.907	49.304	0					34	12	4	0	0	0	0.0026008	1	7453	107.11
DALEIYKR	8	Unmodified	_DALEIYKR_					0	0	0	1	F1MGT4	F1MGT4	F1MGT4	MULTI-MSMS	20140904-PurClathDigest-1ug-01	1	504.28	2	504.279649	1006.54475	29808.79	-6.0861	-0.0030691	0.15693	7.9137E-05	-5.9291	-0.0029899	504.279671760073	38.341	0.34017	38.341	38.178	38.518	0					29	10	4	0	0	0	0.0053353	1	4612	155.75
DALEIYKR	8	Unmodified	_DALEIYKR_					0	0	0	1	F1MGT4	F1MGT4	F1MGT4	MULTI-MSMS	20140904-PurClathDigest-1ug-02	2	504.28	2	504.279649	1006.54475	29619.61	-5.9538	-0.0030024	-0.12876	-6.493E-05	-6.0825	-0.0030673	504.279530539104	38.584	0.38467	38.584	38.409	38.794	0					29	10	4	0	0	0	0.0053353	1	4231	155.75
DALEIYKR	8	Unmodified	_DALEIYKR_					0	0	0	1	F1MGT4	F1MGT4	F1MGT4	MULTI-MSMS	20140904-PurClathDigest-1ug-03	3	504.28	2	504.279649	1006.54475	29159.73	-5.359	-0.0027024	-0.42951	-0.00021659	-5.7885	-0.002919	504.279363263844	38.755	0.36375	38.755	38.61	38.974	0					27	9	4	0	0	0	0.0053353	1	4061	155.75
DAMQYASESK	10	Oxidation (M)	_DAM(ox)QYASESK_		DAM(1)QYASESK		DAM(140.78)QYASESK	0	0	1	0	P49951;F1MPU0	P49951	P49951	MULTI-MSMS	20140904-PurClathDigest-1ug-01	1	573.24	2	573.242603	1144.47065	27603.43	-7.2574	-0.0041602	0.01754	1.0054E-05	-7.2398	-0.0041502	573.242988652978	32.085	1.2732	32.085	31.873	33.147	0					141	40	7	0	0	0	0.00068582	1	2979	140.78
DAMQYASESK	10	Oxidation (M)	_DAM(ox)QYASESK_		DAM(1)QYASESK		DAM(132.25)QYASESK	0	0	1	0	P49951;F1MPU0	P49951	P49951	MULTI-MSMS	20140904-PurClathDigest-1ug-02	2	573.24	2	573.242603	1144.47065	27522.52	-7.1402	-0.0040931	-0.39096	-0.00022412	-7.5312	-0.0043172	573.242848720499	32.127	1.4661	32.127	31.834	33.3	0					132	41	7	0	0	0	0.0043217	2	2700	132.25
DAMQYASESK	10	Oxidation (M)	_DAM(ox)QYASESK_		DAM(1)QYASESK		DAM(140.78)QYASESK	0	0	1	0	P49951;F1MPU0	P49951	P49951	MULTI-MSMS	20140904-PurClathDigest-1ug-03	3	573.24	2	573.242603	1144.47065	27341.68	-7.3684	-0.0042239	-0.92695	-0.00053137	-8.2953	-0.0047552	573.242570866273	32.196	1.3993	32.196	31.907	33.306	0					124	37	7	0	0	0	0.00068582	2	2552	140.78
DAMQYASESK	10	Unmodified	_DAMQYASESK_					0	0	0	0	P49951;F1MPU0	P49951	P49951	MULTI-MSMS	20140904-PurClathDigest-1ug-01	1	565.24	2	565.245146	1128.47574	28280.66	-6.8196	-0.0038547	0.43068	0.00024344	-6.3889	-0.0036113	565.245450879954	35.699	0.55483	35.699	35.502	36.056	0					43	16	5	0	0	0	0.0046376	1	3921	107.06
DAMQYASESK	10	Unmodified	_DAMQYASESK_					0	0	0	0	P49951;F1MPU0	P49951	P49951	MULTI-MSMS	20140904-PurClathDigest-1ug-02	2	565.24	2	565.245146	1128.47574	28375.23	-6.4759	-0.0036605	-0.024969	-1.4113E-05	-6.5009	-0.0036746	565.245144362841	35.884	0.52808	35.884	35.657	36.185	0					44	15	4	0	0	0	0.0034744	1	3574	110.39
DAMQYASESK	10	Unmodified	_DAMQYASESK_					0	0	0	0	P49951;F1MPU0	P49951	P49951	MULTI-MSMS	20140904-PurClathDigest-1ug-03	3	565.24	2	565.245146	1128.47574	28313.87	-7.0607	-0.003991	0.0015546	8.7874E-07	-7.0591	-0.0039901	565.245202350129	35.768	0.58383	35.768	35.51	36.094	0					49	16	5	0	0	0	0.00039897	1	3369	121.36
DAMQYASESKDTELAEELLQWFLQEEKR	28	Oxidation (M)	_DAM(ox)QYASESKDTELAEELLQWFLQEEKR_		DAM(1)QYASESKDTELAEELLQWFLQEEKR		DAM(155.8)QYASESKDTELAEELLQWFLQEEKR	0	0	1	2	P49951;F1MPU0	P49951	P49951	MULTI-MSMS	20140904-PurClathDigest-1ug-01	1	1135.54	3	1135.2048	3402.59257	19323.23	-2.7422	-0.003113	0.43667	0.00049571	-2.3056	-0.0026173	1135.53921187671	58.281	3.0098	58.281	57.887	60.897	-3.8147E-06					283	52	7	0	0	0	7.1399E-08	4	9561	155.8
DAMQYASESKDTELAEELLQWFLQEEKR	28	Oxidation (M)	_DAM(ox)QYASESKDTELAEELLQWFLQEEKR_		DAM(1)QYASESKDTELAEELLQWFLQEEKR		DAM(120.27)QYASESKDTELAEELLQWFLQEEKR	0	0	1	2	P49951;F1MPU0	P49951	P49951	MULTI-MSMS	20140904-PurClathDigest-1ug-01	1	851.91	4	851.655418	3402.59257	22719.49	-2.3397	-0.0019926	0.47362	0.00040336	-1.8661	-0.0015893	852.157082833772	58.271	3.0664	58.271	57.887	60.953	-3.8147E-06					262	53	6	0	0	0	0.00018382	1	9562	120.27
DAMQYASESKDTELAEELLQWFLQEEKR	28	Oxidation (M)	_DAM(ox)QYASESKDTELAEELLQWFLQEEKR_		DAM(1)QYASESKDTELAEELLQWFLQEEKR		DAM(129.72)QYASESKDTELAEELLQWFLQEEKR	0	0	1	2	P49951;F1MPU0	P49951	P49951	MULTI-MSMS	20140904-PurClathDigest-1ug-02	2	1135.54	3	1135.2048	3402.59257	19492.42	-1.9142	-0.0021731	0.034884	3.96E-05	-1.8794	-0.0021335	1135.53904951616	58.076	1.5502	58.076	57.826	59.377	0					137	26	6	0	0	0	5.4984E-05	2	8763	129.72
DAMQYASESKDTELAEELLQWFLQEEKR	28	Oxidation (M)	_DAM(ox)QYASESKDTELAEELLQWFLQEEKR_		DAM(1)QYASESKDTELAEELLQWFLQEEKR		DAM(63.7)QYASESKDTELAEELLQWFLQEEKR	0	0	1	2	P49951;F1MPU0	P49951	P49951	MULTI-MSMS	20140904-PurClathDigest-1ug-02	2	852.16	4	851.655418	3402.59257	22771.63	-1.7978	-0.0015311	0.59262	0.00050471	-1.2052	-0.0010264	851.906983958638	58.076	1.6032	58.076	57.877	59.48	0					185	27	10	0	0	0	0.018356	1	8764	63.701
DAMQYASESKDTELAEELLQWFLQEEKR	28	Oxidation (M)	_DAM(ox)QYASESKDTELAEELLQWFLQEEKR_		DAM(1)QYASESKDTELAEELLQWFLQEEKR		DAM(149.2)QYASESKDTELAEELLQWFLQEEKR	0	0	1	2	P49951;F1MPU0	P49951	P49951	MULTI-MSMS	20140904-PurClathDigest-1ug-03	3	1135.54	3	1135.2048	3402.59257	19382.96	-2.5232	-0.0028643	0.81185	0.00092162	-1.7113	-0.0019427	1135.53957813945	58.094	1.6833	58.094	57.802	59.486	3.8147E-06					147	27	7	0	0	0	9.2719E-08	2	8443	149.2
DAMQYASESKDTELAEELLQWFLQEEKR	28	Oxidation (M)	_DAM(ox)QYASESKDTELAEELLQWFLQEEKR_		DAM(1)QYASESKDTELAEELLQWFLQEEKR		DAM(85.19)QYASESKDTELAEELLQWFLQEEKR	0	0	1	2	P49951;F1MPU0	P49951	P49951	MULTI-MSMS	20140904-PurClathDigest-1ug-03	3	851.9	4	851.655418	3402.59257	22680.79	-1.8482	-0.001574	0.55739	0.0004747	-1.2908	-0.0010993	851.906964674203	58.096	1.8001	58.096	57.743	59.543	0					178	29	8	0	0	0	0.015267	1	8444	85.185
DEASEQDKAPEEKDK	15	Unmodified	_DEASEQDKAPEEKDK_					0	0	0	2	F1N3M8;G3MYP5	F1N3M8;G3MYP5	G3MYP5	MULTI-MSMS	20140904-PurClathDigest-1ug-01	1	573.59	3	573.595361	1717.76425	28135.27	-6.4438	-0.0036961	-0.6194	-0.00035528	-7.0632	-0.0040514	573.595024292202	30.454	0.301	30.454	30.307	30.608	0					16	9	2	0	0	0	0.0056641	1	2598	94.532
DEASEQDKAPEEKDK	15	Unmodified	_DEASEQDKAPEEKDK_					0	0	0	2	F1N3M8;G3MYP5	F1N3M8;G3MYP5	G3MYP5	MULTI-MSMS	20140904-PurClathDigest-1ug-02	2	573.59	3	573.595361	1717.76425	28072.25	-5.1596	-0.0029595	-1.0399	-0.00059651	-6.1996	-0.003556	573.595027123122	30.413	0.48817	30.413	30.189	30.677	0					36	15	4	0	0	0	0.00033563	1	2334	124.62
DEASEQDKAPEEKDK	15	Unmodified	_DEASEQDKAPEEKDK_					0	0	0	2	F1N3M8;G3MYP5	F1N3M8;G3MYP5	G3MYP5	MULTI-MSMS	20140904-PurClathDigest-1ug-03	3	573.59	3	573.595361	1717.76425	28159	-5.1547	-0.0029567	-0.81147	-0.00046545	-5.9661	-0.0034222	573.59516429249	30.418	0.49068	30.418	30.182	30.673	1.9073E-06					36	14	5	0	0	0	2.0152E-08	1	2197	180.11
DFPLNDLLSATELDKIR	17	Unmodified	_DFPLNDLLSATELDKIR_					0	0	0	1	E1BDX8	E1BDX8	E1BDX8	MULTI-MSMS	20140904-PurClathDigest-1ug-01	1	654.35	3	654.017712	1959.03131	26537.09	-1.1127	-0.00072773	0.20121	0.00013159	-0.9115	-0.00059614	654.352371760549	55.392	0.93967	55.392	54.844	55.784	0					85	27	5	0	0	0	0.0012079	1	9108	91.401
DGDKALPEEEPQPSAPAQEAGYSTLAQSHPSDLPEEPSSPQER	43	Unmodified	_DGDKALPEEEPQPSAPAQEAGYSTLAQSHPSDLPEEPSSPQER_					0	0	0	1	F1MEW3	F1MEW3	F1MEW3	MULTI-MSMS	20140904-PurClathDigest-1ug-03	3	1144.28	4	1143.77848	4571.08482	19504.28	-6.7881	-0.0077641	0.82451	0.00094306	-5.9636	-0.0068211	1144.28016702525	42.158	0.50925	42.158	41.896	42.405	0					77	14	8	0	0	0	0.062372	1	4843	28.261
DGEVIKESK	9	Unmodified	_DGEVIKESK_					0	0	0	1	Q28115	Q28115	Q28115	MULTI-MSMS	20140904-PurClathDigest-1ug-01	1	502.76	2	502.766571	1003.51859	29974.47	-6.0365	-0.003035	1.1071	0.00055662	-4.9294	-0.0024784	502.767146918222	31.228	0.27042	31.228	31.041	31.312	1.9073E-06					15	7	3	0	0	0	0.00020621	1	2795	167.1
DGEVIKESK	9	Unmodified	_DGEVIKESK_					0	0	0	1	Q28115	Q28115	Q28115	MULTI-MSMS	20140904-PurClathDigest-1ug-02	2	502.76	2	502.766571	1003.51859	28787.6	-4.5317	-0.0022784	0.99295	0.00049922	-3.5387	-0.0017792	502.767126650218	31.214	0.37717	31.214	30.978	31.355	0					15	9	3	0	0	0	0.00021541	1	2520	144.77
DGEVIKESK	9	Unmodified	_DGEVIKESK_					0	0	0	1	Q28115	Q28115	Q28115	MULTI-MSMS	20140904-PurClathDigest-1ug-03	3	502.77	2	502.766571	1003.51859	29432.22	-4.8851	-0.0024561	1.0291	0.0005174	-3.856	-0.0019387	502.767089132831	31.265	0.36842	31.265	31.032	31.401	-1.9073E-06					16	8	3	0	0	0	0.00042647	1	2397	142.83
DGLAEEVQR	9	Unmodified	_DGLAEEVQR_					0	0	0	0	Q08DH7	Q08DH7	Q08DH7	MULTI-MSMS	20140904-PurClathDigest-1ug-01	1	508.75	2	508.753995	1015.49344	29352.79	-5.7847	-0.002943	0.7383	0.00037561	-5.0464	-0.0025674	508.754373304349	37.306	1.0475	37.306	37.069	38.117	0					102	33	5	0	0	0	0.00028005	1	4312	166.07
DGLAEEVQR	9	Unmodified	_DGLAEEVQR_					0	0	0	0	Q08DH7	Q08DH7	Q08DH7	MULTI-MSMS	20140904-PurClathDigest-1ug-02	2	508.75	2	508.753995	1015.49344	29731.6	-4.7616	-0.0024225	0.29632	0.00015075	-4.4652	-0.0022717	508.754138170733	37.441	1.0493	37.441	37.196	38.246	0					86	30	5	0	0	0	0.00046475	1	3931	150.27
DGLAEEVQR	9	Unmodified	_DGLAEEVQR_					0	0	0	0	Q08DH7	Q08DH7	Q08DH7	MULTI-MSMS	20140904-PurClathDigest-1ug-03	3	508.75	2	508.753995	1015.49344	29445.18	-4.7355	-0.0024092	-0.27311	-0.00013895	-5.0086	-0.0025481	508.753912909524	37.449	1.3832	37.449	37.154	38.537	0					80	37	5	0	0	0	0.00048305	1	3738	150.27
DGQETAFASYDR	12	Unmodified	_DGQETAFASYDR_					0	0	0	0	E1BKN2	E1BKN2	E1BKN2	MULTI-MSMS	20140904-PurClathDigest-1ug-01	1	680.29	2	680.294213	1358.57387	25596.97	-6.2096	-0.0042243	-0.069307	-4.7149E-05	-6.2789	-0.0042715	680.294228539348	40.175	0.52299	40.175	39.974	40.497	0					47	16	4	0	0	0	0.00011056	1	5082	129.34
DGQETAFASYDR	12	Unmodified	_DGQETAFASYDR_					0	0	0	0	E1BKN2	E1BKN2	E1BKN2	MULTI-MSMS	20140904-PurClathDigest-1ug-02	2	680.29	2	680.294213	1358.57387	24969.86	-5.8902	-0.0040071	0.15261	0.00010382	-5.7376	-0.0039032	680.294307101128	40.535	0.58642	40.535	40.312	40.899	0					51	17	5	0	0	0	0.00017321	1	4687	122.39
DGQETAFASYDR	12	Unmodified	_DGQETAFASYDR_					0	0	0	0	E1BKN2	E1BKN2	E1BKN2	MULTI-MSMS	20140904-PurClathDigest-1ug-03	3	680.29	2	680.294213	1358.57387	25125.45	-5.688	-0.0038695	-0.1418	-9.6469E-05	-5.8298	-0.003966	680.294041771335	40.529	0.55933	40.529	40.33	40.89	0					52	16	5	0	0	0	1.9994E-06	1	4451	158.01
DHGESAHAVYDKFSVGDAR	19	Unmodified	_DHGESAHAVYDKFSVGDAR_					0	0	0	1	F1MRZ5;F1MRZ6	F1MRZ5	F1MRZ5	MULTI-MSMS	20140904-PurClathDigest-1ug-02	2	516.24	4	515.990972	2059.93478	29060.06	-5.2399	-0.0027037	-0.0021188	-1.0933E-06	-5.242	-0.0027048	516.241618549295	38.684	0.41817	38.684	38.509	38.928	-3.8147E-06					28	11	4	0	0	0	9.6638E-06	1	4254	119.8
DHGESAHAVYDKFSVGDAR	19	Unmodified	_DHGESAHAVYDKFSVGDAR_					0	0	0	1	F1MRZ5;F1MRZ6	F1MRZ5	F1MRZ5	MULTI-MSMS	20140904-PurClathDigest-1ug-03	3	515.99	4	515.990972	2059.93478	28917.75	-4.6745	-0.002412	0.51571	0.0002661	-4.1588	-0.0021459	515.991243885155	38.884	0.36725	38.884	38.743	39.11	0					26	9	4	0	0	0	0.011192	1	4086	71.592
DIEESSLVK	9	Unmodified	_DIEESSLVK_					0	0	0	0	F1MDZ2;O77788	F1MDZ2	F1MDZ2	MULTI-MSMS	20140904-PurClathDigest-1ug-01	1	510.26	2	510.266404	1018.51826	29033.87	-5.4077	-0.0027594	0.49731	0.00025376	-4.9104	-0.0025056	510.26666779974	39.196	0.82042	39.196	38.971	39.792	-3.8147E-06					82	26	5	0	0	0	0.055768	1	4824	70.028
DIEESSLVKVELDKK	15	Unmodified	_DIEESSLVKVELDKK_					0	0	0	2	F1MDZ2;O77788	F1MDZ2	F1MDZ2	MULTI-MSMS	20140904-PurClathDigest-1ug-01	1	577.98	3	577.984008	1730.9302	27499.28	-5.1675	-0.0029867	-0.77021	-0.00044517	-5.9377	-0.0034319	577.98351222172	41.616	1.3295	41.616	41.329	42.659	0					133	43	5	0	0	0	2.1868E-05	1	5434	143.97
DIEESSLVKVELDKK	15	Unmodified	_DIEESSLVKVELDKK_					0	0	0	2	F1MDZ2;O77788	F1MDZ2	F1MDZ2	MULTI-MSMS	20140904-PurClathDigest-1ug-01	1	866.47	2	866.472374	1730.9302	22887.06	-4.7429	-0.0041096	-0.83925	-0.00072719	-5.5822	-0.0048368	866.471551909237	41.553	0.791	41.553	41.36	42.151	0					57	25	5	0	0	0	0.00033883	1	5449	149
DIEESSLVKVELDKK	15	Unmodified	_DIEESSLVKVELDKK_					0	0	0	2	F1MDZ2;O77788	F1MDZ2	F1MDZ2	MULTI-MSMS	20140904-PurClathDigest-1ug-02	2	577.98	3	577.984008	1730.9302	27387.45	-5.2161	-0.0030148	-0.3602	-0.00020819	-5.5763	-0.003223	577.983719734047	41.867	1.725	41.867	41.569	43.294	0					127	53	6	0	0	0	2.1586E-05	1	4992	144.29
DIEESSLVKVELDKK	15	Unmodified	_DIEESSLVKVELDKK_					0	0	0	2	F1MDZ2;O77788	F1MDZ2	F1MDZ2	MULTI-MSMS	20140904-PurClathDigest-1ug-02	2	866.47	2	866.472374	1730.9302	22653	-5.4058	-0.004684	0.26351	0.00022832	-5.1423	-0.0044556	866.472547313607	41.805	0.52458	41.805	41.601	42.126	0					51	15	5	0	0	0	6.7549E-10	1	4996	207.66
DIEESSLVKVELDKK	15	Unmodified	_DIEESSLVKVELDKK_					0	0	0	2	F1MDZ2;O77788	F1MDZ2	F1MDZ2	MULTI-MSMS	20140904-PurClathDigest-1ug-03	3	578.32	3	577.984008	1730.9302	27603.8	-5.7	-0.0032945	-0.65972	-0.00038131	-6.3597	-0.0036758	577.983624906679	41.812	0.89975	41.812	41.57	42.47	3.8147E-06					92	26	6	0	0	0	1.2983E-05	1	4760	153.94
DIEESSLVKVELDKK	15	Unmodified	_DIEESSLVKVELDKK_					0	0	0	2	F1MDZ2;O77788	F1MDZ2	F1MDZ2	MULTI-MSMS	20140904-PurClathDigest-1ug-03	3	866.47	2	866.472374	1730.9302	22445.83	-5.6689	-0.0049119	-0.082126	-7.116E-05	-5.751	-0.0049831	866.472262232735	41.791	0.47609	41.791	41.633	42.109	0					41	13	5	0	0	0	1.0366E-11	1	4770	224.06
DIENQYETQITQIEHEVSSSGQEVQSSAK	29	Unmodified	_DIENQYETQITQIEHEVSSSGQEVQSSAK_					0	0	0	0	CON__P35527	CON__P35527	CON__P35527	MULTI-MSMS	20140904-PurClathDigest-1ug-01	1	1089.51	3	1088.84281	3263.50659	20358.8	-2.0803	-0.0022651	-0.54273	-0.00059095	-2.623	-0.0028561	1089.17661796782	51.575	0.52292	51.575	51.358	51.881	-3.8147E-06					64	16	5	0	0	0	0.00030618	1	8077	76.573
DIENQYETQITQIEHEVSSSGQEVQSSAK	29	Unmodified	_DIENQYETQITQIEHEVSSSGQEVQSSAK_					0	0	0	0	CON__P35527	CON__P35527	CON__P35527	MULTI-MSMS	20140904-PurClathDigest-1ug-02	2	1089.17	3	1088.84281	3263.50659	20245.72	-2.155	-0.0023465	-0.21128	-0.00023005	-2.3663	-0.0025765	1089.17705901851	51.594	0.48116	51.594	51.44	51.921	-3.8147E-06					62	14	8	0	0	0	1.9226E-07	1	7458	100.95
DIENQYETQITQIEHEVSSSGQEVQSSAK	29	Unmodified	_DIENQYETQITQIEHEVSSSGQEVQSSAK_					0	0	0	0	CON__P35527	CON__P35527	CON__P35527	MULTI-MSMS	20140904-PurClathDigest-1ug-03	3	1089.51	3	1088.84281	3263.50659	20339.22	-2.4053	-0.002619	0.16089	0.00017518	-2.2445	-0.0024439	1089.17745705957	51.588	0.5895	51.588	51.407	51.996	0					68	17	7	0	0	0	3.2823E-27	1	7174	195.73
DIKPQLELIEDEEKLK	16	Unmodified	_DIKPQLELIEDEEKLK_					0	0	0	2	F1N1S2	F1N1S2	F1N1S2	MULTI-MSMS	20140904-PurClathDigest-1ug-01	1	647.36	3	647.357734	1939.05137	25920.08	-4.1638	-0.0026955	1.3718	0.00088802	-2.7921	-0.0018075	647.693039698303	45.164	0.41117	45.164	44.988	45.399	-3.8147E-06					49	13	5	0	0	0	0.0054736	1	6409	87.088
DIKPQLELIEDEEKLK	16	Unmodified	_DIKPQLELIEDEEKLK_					0	0	0	2	F1N1S2	F1N1S2	F1N1S2	MULTI-MSMS	20140904-PurClathDigest-1ug-02	2	647.36	3	647.357734	1939.05137	26052.99	-2.4988	-0.0016176	0.080305	5.1986E-05	-2.4185	-0.0015656	647.692143966044	45.716	0.42608	45.716	45.523	45.949	0					47	13	5	0	0	0	0.00038661	1	5988	111.22
DIKPQLELIEDEEKLK	16	Unmodified	_DIKPQLELIEDEEKLK_					0	0	0	2	F1N1S2	F1N1S2	F1N1S2	MULTI-MSMS	20140904-PurClathDigest-1ug-03	3	647.69	3	647.357734	1939.05137	26144.3	-3.4575	-0.0022382	0.66146	0.0004282	-2.796	-0.00181	647.692509228552	45.66	0.33949	45.66	45.473	45.813	-3.8147E-06					42	10	5	0	0	0	0.0017402	1	5720	95.197
DIQGTEEEKAPPTLFGHTLGASLEDTKPK	29	Unmodified	_DIQGTEEEKAPPTLFGHTLGASLEDTKPK_					0	0	0	2	F1MEW3	F1MEW3	F1MEW3	MULTI-MSMS	20140904-PurClathDigest-1ug-01	1	778.4	4	778.147657	3108.56152	23874.07	-4.3087	-0.0033528	-0.1743	-0.00013563	-4.483	-0.0034885	778.398436977977	44.314	1.3155	44.314	43.848	45.163	0					186	43	8	0	0	0	0.027462	2	6163	82.503
DIQGTEEEKAPPTLFGHTLGASLEDTKPK	29	Unmodified	_DIQGTEEEKAPPTLFGHTLGASLEDTKPK_					0	0	0	2	F1MEW3	F1MEW3	F1MEW3	MULTI-MSMS	20140904-PurClathDigest-1ug-01	1	1037.53	3	1037.19445	3108.56152	20368.88	-4.578	-0.0047482	0.16647	0.00017266	-4.4115	-0.0045756	1037.52905849297	44.307	0.87308	44.307	44.115	44.988	3.8147E-06					89	28	7	0	0	0	0.014691	1	6168	90.388
DIQGTEEEKAPPTLFGHTLGASLEDTKPK	29	Unmodified	_DIQGTEEEKAPPTLFGHTLGASLEDTKPK_					0	0	0	2	F1MEW3	F1MEW3	F1MEW3	MULTI-MSMS	20140904-PurClathDigest-1ug-02	2	778.4	4	778.147657	3108.56152	23829.67	-4.5423	-0.0035346	0.027496	2.1396E-05	-4.5148	-0.0035132	778.398759340975	44.824	1.2434	44.824	44.464	45.707	0					141	38	7	0	0	0	0.042755	2	5746	60.527
DIQGTEEEKAPPTLFGHTLGASLEDTKPK	29	Unmodified	_DIQGTEEEKAPPTLFGHTLGASLEDTKPK_					0	0	0	2	F1MEW3	F1MEW3	F1MEW3	MULTI-MSMS	20140904-PurClathDigest-1ug-02	2	1037.53	3	1037.19445	3108.56152	20491.65	-4.6894	-0.0048638	0.74119	0.00076876	-3.9482	-0.004095	1037.52975314682	44.812	0.70934	44.812	44.657	45.366	3.8147E-06					79	21	8	0	0	0	0.0039286	1	5755	103.42
DIQGTEEEKAPPTLFGHTLGASLEDTKPK	29	Unmodified	_DIQGTEEEKAPPTLFGHTLGASLEDTKPK_					0	0	0	2	F1MEW3	F1MEW3	F1MEW3	MULTI-MSMS	20140904-PurClathDigest-1ug-03	3	778.4	4	778.147657	3108.56152	23929.16	-5.2485	-0.0040841	0.82974	0.00064566	-4.4188	-0.0034384	778.399212812006	44.88	1.1766	44.88	44.485	45.661	-3.8147E-06					161	36	9	0	0	0	0.01916	1	5505	83.332
DIQGTEEEKAPPTLFGHTLGASLEDTKPK	29	Unmodified	_DIQGTEEEKAPPTLFGHTLGASLEDTKPK_					0	0	0	2	F1MEW3	F1MEW3	F1MEW3	MULTI-MSMS	20140904-PurClathDigest-1ug-03	3	1037.53	3	1037.19445	3108.56152	20409.04	-4.9902	-0.0051758	1.0442	0.0010831	-3.9459	-0.0040927	1037.53003842741	44.903	0.64225	44.903	44.708	45.35	-3.8147E-06					91	19	8	0	0	0	0.00025149	1	5521	110.9
DKAGEPQDQAVEQK	14	Unmodified	_DKAGEPQDQAVEQK_					0	0	0	1	F1N3M8;G3MYP5	F1N3M8;G3MYP5	G3MYP5	MULTI-MSMS	20140904-PurClathDigest-1ug-01	1	771.87	2	771.873359	1541.73216	24457.93	-5.529	-0.0042677	0.98725	0.00076203	-4.5418	-0.0035057	771.873339740781	31.283	0.48308	31.283	31.075	31.558	3.8147E-06					36	14	5	0	0	0	5.1059E-08	1	2793	162.64
DKAGEPQDQAVEQK	14	Unmodified	_DKAGEPQDQAVEQK_					0	0	0	1	F1N3M8;G3MYP5	F1N3M8;G3MYP5	G3MYP5	MULTI-MSMS	20140904-PurClathDigest-1ug-01	1	514.92	3	514.917998	1541.73216	29486.02	-5.8318	-0.0030029	0.4741	0.00024412	-5.3576	-0.0027587	514.918341339058	31.264	0.29183	31.264	31.142	31.434	-1.9073E-06					19	8	3	0	0	0	0.00015644	1	2798	125.97
DKAGEPQDQAVEQK	14	Unmodified	_DKAGEPQDQAVEQK_					0	0	0	1	F1N3M8;G3MYP5	F1N3M8;G3MYP5	G3MYP5	MULTI-MSMS	20140904-PurClathDigest-1ug-02	2	771.87	2	771.873359	1541.73216	24037.25	-4.3357	-0.0033466	0.65422	0.00050498	-3.6815	-0.0028417	771.87358178373	31.259	0.47683	31.259	31.084	31.56	1.9073E-06					37	12	5	0	0	0	6.0836E-11	1	2516	196.97
DKAGEPQDQAVEQK	14	Unmodified	_DKAGEPQDQAVEQK_					0	0	0	1	F1N3M8;G3MYP5	F1N3M8;G3MYP5	G3MYP5	MULTI-MSMS	20140904-PurClathDigest-1ug-03	3	771.87	2	771.873359	1541.73216	24262.87	-4.7209	-0.003644	1.2382	0.00095574	-3.4827	-0.0026882	771.873744132432	31.309	0.47308	31.309	31.107	31.58	0					36	11	5	0	0	0	2.3118E-10	1	2388	187.08
DKAGEPQDQAVEQK	14	Unmodified	_DKAGEPQDQAVEQK_					0	0	0	1	F1N3M8;G3MYP5	F1N3M8;G3MYP5	G3MYP5	MULTI-MSMS	20140904-PurClathDigest-1ug-03	3	514.92	3	514.917998	1541.73216	29163.89	-4.6821	-0.0024109	0.91613	0.00047173	-3.766	-0.0019392	514.918670588814	31.293	0.43525	31.293	31.107	31.542	0					28	10	4	0	0	0	0.002247	1	2398	96.673
DKALEQEDKVPEGK	14	Unmodified	_DKALEQEDKVPEGK_					0	0	0	2	G3MYP5	G3MYP5	G3MYP5	MULTI-MSMS	20140904-PurClathDigest-1ug-01	1	793.4	2	793.407034	1584.79952	23827.11	-6.5341	-0.0051842	0.1694	0.0001344	-6.3647	-0.0050498	793.407175342873	32.706	0.37933	32.706	32.546	32.926	0					19	11	2	0	0	0	1.7665E-07	1	3170	193.47
DKALEQEDKVPEGK	14	Unmodified	_DKALEQEDKVPEGK_					0	0	0	2	G3MYP5	G3MYP5	G3MYP5	MULTI-MSMS	20140904-PurClathDigest-1ug-02	2	793.4	2	793.407034	1584.79952	23658.65	-6.1464	-0.0048766	-0.50011	-0.00039679	-6.6465	-0.0052734	793.406666064344	32.819	0.36408	32.819	32.667	33.031	0					18	10	2	0	0	0	3.0785E-07	1	2886	188.9
DKALEQEDKVPEGK	14	Unmodified	_DKALEQEDKVPEGK_					0	0	0	2	G3MYP5	G3MYP5	G3MYP5	MULTI-MSMS	20140904-PurClathDigest-1ug-02	2	529.27	3	529.273782	1584.79952	29274.17	-6.2725	-0.0033199	-0.74727	-0.00039551	-7.0198	-0.0037154	529.273303243418	32.823	0.59216	32.823	32.636	33.228	0					27	16	2	0	0	0	4.6489E-06	1	2890	169.94
DKALEQEDKVPEGK	14	Unmodified	_DKALEQEDKVPEGK_					0	0	0	2	G3MYP5	G3MYP5	G3MYP5	MULTI-MSMS	20140904-PurClathDigest-1ug-03	3	529.27	3	529.273782	1584.79952	29168.96	-6.2502	-0.0033081	-1.2939	-0.00068482	-7.5441	-0.0039929	529.27303410237	32.92	0.69617	32.92	32.718	33.414	0					31	18	2	0	0	0	1.8262E-05	1	2748	155.03
DKFLEEK	7	Unmodified	_DKFLEEK_					0	0	0	1	F1N3M8	F1N3M8	F1N3M8	MSMS	20140904-PurClathDigest-1ug-02	2	454.74	2	454.739825	907.465098	NaN	NaN	NaN	NaN	NaN	NaN	NaN	NaN	34.791	1	34.791	34.291	35.291	0								0	0	0	0.0050122	1	3343	110.41
DKFLEEK	7	Unmodified	_DKFLEEK_					0	0	0	1	F1N3M8	F1N3M8	F1N3M8	MULTI-MSMS	20140904-PurClathDigest-1ug-03	3	454.74	2	454.739825	907.465098	29740.38	-6.8762	-0.0031269	0.85794	0.00039014	-6.0183	-0.0027368	454.740250949608	34.773	0.26558	34.773	34.652	34.917	0					18	7	3	0	0	0	0.016874	1	3165	93.267
DKTQEQESPVQEDK	14	Unmodified	_DKTQEQESPVQEDK_					0	0	0	1	F1N3M8;G3MYP5	F1N3M8;G3MYP5	G3MYP5	MULTI-MSMS	20140904-PurClathDigest-1ug-02	2	830.88	2	830.886663	1659.75877	23050.13	-7.0716	-0.0058757	0.4813	0.00039991	-6.5903	-0.0054758	830.886677113972	31.594	0.75208	31.594	31.011	31.763	0					43	20	4	0	0	0	1.0038E-12	1	2615	223.7
DKTQEQESPVQEDK	14	Unmodified	_DKTQEQESPVQEDK_					0	0	0	1	F1N3M8;G3MYP5	F1N3M8;G3MYP5	G3MYP5	MULTI-MSMS	20140904-PurClathDigest-1ug-03	3	830.88	2	830.886663	1659.75877	23237.6	-6.717	-0.005581	-0.13202	-0.0001097	-6.849	-0.0056907	830.886577573489	31.651	0.59017	31.651	31.281	31.871	1.9073E-06					43	15	4	0	0	0	6.3267E-13	1	2468	197.47
DKTQEQESPVQEDKTMAPK	19	Oxidation (M)	_DKTQEQESPVQEDKTM(ox)APK_		DKTQEQESPVQEDKTM(1)APK		DKTQEQESPVQEDKTM(99.31)APK	0	0	1	2	F1N3M8;G3MYP5	F1N3M8;G3MYP5	G3MYP5	MULTI-MSMS	20140904-PurClathDigest-1ug-01	1	735.68	3	735.68284	2204.02669	24775.95	-7.3082	-0.0053765	0.11055	8.1328E-05	-7.1977	-0.0052952	736.01723307437	31.96	0.50241	31.96	31.682	32.184	0					61	15	6	0	0	0	0.006826	1	2964	99.313
DKTQEQESPVQEDKTMAPK	19	Oxidation (M)	_DKTQEQESPVQEDKTM(ox)APK_		DKTQEQESPVQEDKTM(1)APK		DKTQEQESPVQEDKTM(86.89)APK	0	0	1	2	F1N3M8;G3MYP5	F1N3M8;G3MYP5	G3MYP5	MULTI-MSMS	20140904-PurClathDigest-1ug-02	2	736.01	3	735.68284	2204.02669	24541.06	-7.2174	-0.0053097	-0.39679	-0.00029191	-7.6142	-0.0056016	736.016900333333	31.99	0.55625	31.99	31.698	32.254	0					69	15	6	0	0	0	0.017212	1	2677	86.89
DKTQEQESPVQEDKTMAPK	19	Oxidation (M)	_DKTQEQESPVQEDKTM(ox)APK_		DKTQEQESPVQEDKTM(1)APK		DKTQEQESPVQEDKTM(103.9)APK	0	0	1	2	F1N3M8;G3MYP5	F1N3M8;G3MYP5	G3MYP5	MULTI-MSMS	20140904-PurClathDigest-1ug-03	3	735.68	3	735.68284	2204.02669	24663.24	-7.5789	-0.0055757	-0.44169	-0.00032494	-8.0206	-0.0059006	736.016874467503	32.052	0.59683	32.052	31.766	32.362	0					68	15	6	0	0	0	0.0087576	1	2540	103.9
DKVSDGVTK	9	Unmodified	_DKVSDGVTK_					0	0	0	1	F1MEW3	F1MEW3	F1MEW3	MULTI-MSMS	20140904-PurClathDigest-1ug-01	1	474.75	2	474.753464	947.492375	31809.71	-6.3448	-0.0030122	0.53007	0.00025165	-5.8147	-0.0027605	474.753540259897	30.61	0.3345	30.61	30.425	30.759	0					25	10	4	0	0	0	0.0028639	1	2635	127.7
DKVSDGVTK	9	Unmodified	_DKVSDGVTK_					0	0	0	1	F1MEW3	F1MEW3	F1MEW3	MULTI-MSMS	20140904-PurClathDigest-1ug-02	2	474.75	2	474.753464	947.492375	31074.99	-4.8404	-0.002298	0.25829	0.00012262	-4.5821	-0.0021754	474.753436278193	30.589	0.41942	30.589	30.418	30.838	0					24	12	4	0	0	0	0.00021013	1	2375	158.94
DKVSDGVTK	9	Unmodified	_DKVSDGVTK_					0	0	0	1	F1MEW3	F1MEW3	F1MEW3	MULTI-MSMS	20140904-PurClathDigest-1ug-03	3	474.75	2	474.753464	947.492375	31468.19	-4.8004	-0.002279	0.21805	0.00010352	-4.5823	-0.0021755	474.753451524866	30.596	0.50142	30.596	30.273	30.774	-1.9073E-06					29	14	4	0	0	0	0.003876	1	2243	120.86
DLAALEDKVK	10	Unmodified	_DLAALEDKVK_					0	0	0	1	E1BFB0	E1BFB0	E1BFB0	MULTI-MSMS	20140904-PurClathDigest-1ug-01	1	551.31	2	551.311146	1100.60774	28247.4	-4.8166	-0.0026554	0.7326	0.00040389	-4.084	-0.0022516	551.311371986013	41.382	0.26633	41.382	41.24	41.507	-3.8147E-06					28	8	5	0	0	0	0.0014062	1	5403	133.75
DLAALEDKVK	10	Unmodified	_DLAALEDKVK_					0	0	0	1	E1BFB0	E1BFB0	E1BFB0	MULTI-MSMS	20140904-PurClathDigest-1ug-02	2	551.31	2	551.311146	1100.60774	27767.79	-4.918	-0.0027113	0.64239	0.00035415	-4.2756	-0.0023572	551.311447435799	41.645	0.29675	41.645	41.502	41.799	0					26	8	4	0	0	0	0.0036517	1	4975	118.81
DLAALEDKVK	10	Unmodified	_DLAALEDKVK_					0	0	0	1	E1BFB0	E1BFB0	E1BFB0	MULTI-MSMS	20140904-PurClathDigest-1ug-03	3	551.31	2	551.311146	1100.60774	27724.07	-4.7513	-0.0026194	0.19067	0.00010512	-4.5606	-0.0025143	551.311095911625	41.642	0.2935	41.642	41.502	41.796	0					26	8	4	0	0	0	0.0033785	1	4741	120.63
DLAALGDKVNSLGETAER	18	Unmodified	_DLAALGDKVNSLGETAER_					0	0	0	1	E1BFB0	E1BFB0	E1BFB0	MULTI-MSMS	20140904-PurClathDigest-1ug-02	2	929.98	2	929.978886	1857.94322	22457.54	-3.7089	-0.0034492	-0.71629	-0.00066613	-4.4252	-0.0041153	930.479276517921	44.84	0.448	44.84	44.689	45.137	0					38	13	5	0	0	0	5.0848E-13	1	5775	197.14
DLASVQALLR	10	Unmodified	_DLASVQALLR_					0	0	0	0	E1BFB0	E1BFB0	E1BFB0	MULTI-MSMS	20140904-PurClathDigest-1ug-01	1	543.32	2	543.319306	1084.62406	28380.56	-3.2141	-0.0017463	-0.5249	-0.00028519	-3.739	-0.0020314	543.319710301152	49.93	0.33292	49.93	49.755	50.088	0					26	10	4	0	0	0	9.7143E-05	1	7683	163.16
DLASVQALLR	10	Unmodified	_DLASVQALLR_					0	0	0	0	E1BFB0	E1BFB0	E1BFB0	MULTI-MSMS	20140904-PurClathDigest-1ug-02	2	543.32	2	543.319306	1084.62406	28324.63	-2.6341	-0.0014312	0.19468	0.00010577	-2.4394	-0.0013254	543.319473304676	50.222	0.29099	50.222	50.079	50.37	0					23	8	4	0	0	0	0.00012546	1	7119	155.84
DLASVQALLR	10	Unmodified	_DLASVQALLR_					0	0	0	0	E1BFB0	E1BFB0	E1BFB0	MULTI-MSMS	20140904-PurClathDigest-1ug-03	3	543.32	2	543.319306	1084.62406	28352.49	-2.2828	-0.0012403	0.24014	0.00013047	-2.0426	-0.0011098	543.319545746869	50.376	0.32167	50.376	50.199	50.52	0					17	9	2	0	0	0	0.00013553	1	6883	153.24
DLATDLSLIEVK	12	Unmodified	_DLATDLSLIEVK_					0	0	0	0	F1MEW3	F1MEW3	F1MEW3	MULTI-MSMS	20140904-PurClathDigest-1ug-02	2	658.87	2	658.869025	1315.7235	26209.3	-2.868	-0.0018897	-0.1152	-7.5905E-05	-2.9832	-0.0019656	658.869049847044	53.475	0.70792	53.475	53.255	53.963	0					53	18	4	0	0	0	0.0096879	1	7886	85.554
DLATDLSLIEVK	12	Unmodified	_DLATDLSLIEVK_					0	0	0	0	F1MEW3	F1MEW3	F1MEW3	MULTI-MSMS	20140904-PurClathDigest-1ug-03	3	658.87	2	658.869025	1315.7235	26172.49	-2.8156	-0.0018551	-0.091207	-6.0094E-05	-2.9068	-0.0019152	658.868986264745	53.56	0.75142	53.56	53.361	54.113	-3.8147E-06					51	18	4	0	0	0	3.5952E-06	1	7619	142.83
DLATGAVPASLKPSK	15	Unmodified	_DLATGAVPASLKPSK_					0	0	0	1	F1N3M8;G3MYP5	F1N3M8;G3MYP5	G3MYP5	MULTI-MSMS	20140904-PurClathDigest-1ug-01	1	727.91	2	727.914298	1453.81404	24695	-4.6087	-0.0033548	-0.90797	-0.00066093	-5.5167	-0.0040157	727.913682820697	39.505	1.1891	39.505	39.062	40.251	3.8147E-06					120	38	6	0	0	0	0.00095117	2	4875	107.5
DLATGAVPASLKPSK	15	Unmodified	_DLATGAVPASLKPSK_					0	0	0	1	F1N3M8;G3MYP5	F1N3M8;G3MYP5	G3MYP5	MULTI-MSMS	20140904-PurClathDigest-1ug-02	2	727.91	2	727.914298	1453.81404	24645.81	-4.4436	-0.0032346	-0.29496	-0.00021471	-4.7386	-0.0034493	727.914084222914	39.872	1.0493	39.872	39.425	40.474	3.8147E-06					107	31	6	0	0	0	4.0216E-05	2	4510	126.77
DLATGAVPASLKPSK	15	Unmodified	_DLATGAVPASLKPSK_					0	0	0	1	F1N3M8;G3MYP5	F1N3M8;G3MYP5	G3MYP5	MULTI-MSMS	20140904-PurClathDigest-1ug-03	3	727.91	2	727.914298	1453.81404	24643.6	-4.6194	-0.0033626	0.20356	0.00014818	-4.4159	-0.0032144	727.914435177725	39.899	0.95916	39.899	39.472	40.431	0					96	27	6	0	0	0	0.00027869	1	4291	126.77
DLEEWNQR	8	Unmodified	_DLEEWNQR_					0	0	0	0	P04975;G3N252	P04975	P04975	MULTI-MSMS	20140904-PurClathDigest-1ug-01	1	545.25	2	545.25162	1088.48869	28885.58	-6.2053	-0.0033835	1.1008	0.00060021	-5.1045	-0.0027832	545.252327385578	40.776	1.326	40.776	40.556	41.882	0					143	42	6	0	0	0	0.00063524	3	5358	162.5
DLEEWNQR	8	Unmodified	_DLEEWNQR_					0	0	0	0	P04975;G3N252	P04975	P04975	MULTI-MSMS	20140904-PurClathDigest-1ug-02	2	545.25	2	545.25162	1088.48869	29077.9	-5.6952	-0.0031053	0.34169	0.00018631	-5.3535	-0.002919	545.251934815917	41.157	1.8268	41.157	40.929	42.756	3.8147E-06					140	56	6	0	0	0	0.00099385	2	4826	147.52
DLEEWNQR	8	Unmodified	_DLEEWNQR_					0	0	0	0	P04975;G3N252	P04975	P04975	MULTI-MSMS	20140904-PurClathDigest-1ug-03	3	545.25	2	545.25162	1088.48869	28872.06	-5.5959	-0.0030512	0.50295	0.00027423	-5.0929	-0.0027769	545.252055883868	41.158	1.42	41.158	40.953	42.373	0					130	42	6	0	0	0	0.00099385	3	4592	147.52
DLEEWNQR	8	Deamidation (NQ)	_DLEEWN(de)QR_	DLEEWN(0.995)Q(0.005)R		DLEEWN(22.8)Q(-22.8)R		0	1	0	0	P04975;G3N252	P04975	P04975	MULTI-MSMS	20140904-PurClathDigest-1ug-03	3	545.74	2	545.743628	1089.4727	29547.43	-6.0272	-0.0032893	-1.3505	-0.00073705	-7.3777	-0.0040263	545.742898706739	42.185	0.3405	42.185	42.001	42.342	0					21	9	3	0	0	0	0.030286	1	4877	119.29
DLMSWINGIR	10	Oxidation (M),Deamidation (NQ)	_DLM(ox)SWIN(de)GIR_	DLMSWIN(1)GIR	DLM(1)SWINGIR	DLMSWIN(143.03)GIR	DLM(143.03)SWINGIR	0	1	1	0	E1BFB0	E1BFB0	E1BFB0	MULTI-MSMS	20140904-PurClathDigest-1ug-02	2	611.3	2	611.300255	1220.58596	26753.34	-3.0156	-0.0018434	-0.11382	-6.9577E-05	-3.1294	-0.001913	611.300214414514	49.246	0.38175	49.246	49.055	49.437	0					29	10	4	0	0	0	9.3857E-05	1	6888	143.03
DLSSSEKQEHVK	12	Unmodified	_DLSSSEKQEHVK_					0	0	0	1	F1MIC9	F1MIC9	F1MIC9	MULTI-MSMS	20140904-PurClathDigest-1ug-01	1	462.9	3	462.900167	1385.67867	30984.31	-5.9412	-0.0027502	-1.1094	-0.00051356	-7.0506	-0.0032637	462.89968234703	31.138	0.30317	31.138	31.009	31.312	1.9073E-06					15	8	2	0	0	0	0.0054262	1	2772	93.623
DLSSSEKQEHVK	12	Unmodified	_DLSSSEKQEHVK_					0	0	0	1	F1MIC9	F1MIC9	F1MIC9	MULTI-MSMS	20140904-PurClathDigest-1ug-02	2	462.9	3	462.900167	1385.67867	31210.32	-5.132	-0.0023756	-1.0502	-0.00048614	-6.1822	-0.0028617	462.899585128979	31.085	0.34058	31.085	30.945	31.285	-1.9073E-06					14	8	2	0	0	0	0.0066368	1	2495	89.301
DLSSSEKQEHVK	12	Unmodified	_DLSSSEKQEHVK_					0	0	0	1	F1MIC9	F1MIC9	F1MIC9	MULTI-MSMS	20140904-PurClathDigest-1ug-03	3	462.9	3	462.900167	1385.67867	31253.81	-5.0925	-0.0023573	0.029604	1.3704E-05	-5.0629	-0.0023436	462.900081250641	31.124	0.284	31.124	30.997	31.281	1.9073E-06					11	6	2	0	0	0	0.0037803	1	2362	99.5
DLTGQVATPAVK	12	Unmodified	_DLTGQVATPAVK_					0	0	0	0	F1N1S2	F1N1S2	F1N1S2	MULTI-MSMS	20140904-PurClathDigest-1ug-01	1	600.33	2	600.335153	1198.65575	27089.66	-5.5219	-0.003315	0.32691	0.00019626	-5.195	-0.0031187	600.335398520264	38.622	0.5755	38.622	38.237	38.813	0					53	18	4	0	0	0	0.00377	1	4709	92.19
DLTGQVATPAVK	12	Unmodified	_DLTGQVATPAVK_					0	0	0	0	F1N1S2	F1N1S2	F1N1S2	MULTI-MSMS	20140904-PurClathDigest-1ug-02	2	600.33	2	600.335153	1198.65575	27305.37	-5.0199	-0.0030136	0.87778	0.00052696	-4.1421	-0.0024866	600.335610882376	38.846	0.7185	38.846	38.441	39.16	-3.8147E-06					50	20	3	0	0	0	0.0014958	1	4264	111.96
DLTGQVATPAVK	12	Unmodified	_DLTGQVATPAVK_					0	0	0	0	F1N1S2	F1N1S2	F1N1S2	MULTI-MSMS	20140904-PurClathDigest-1ug-03	3	600.33	2	600.335153	1198.65575	27033.97	-4.9697	-0.0029835	0.4912	0.00029488	-4.4785	-0.0026886	600.335568603002	38.965	0.76941	38.965	38.574	39.344	0					70	21	5	0	0	0	0.0002246	1	4081	120.53
DLTGVQNLR	9	Unmodified	_DLTGVQNLR_					0	0	0	0	E1BFB0	E1BFB0	E1BFB0	MULTI-MSMS	20140904-PurClathDigest-1ug-02	2	508.28	2	508.28018	1014.54581	29984.65	-5.6272	-0.0028602	0.54385	0.00027643	-5.0833	-0.0025838	508.280256572232	40.463	0.25825	40.463	40.345	40.603	0					21	7	3	0	0	0	0.00047662	1	4677	147.19
DLTGVQNLR	9	Unmodified	_DLTGVQNLR_					0	0	0	0	E1BFB0	E1BFB0	E1BFB0	MULTI-MSMS	20140904-PurClathDigest-1ug-03	3	508.28	2	508.28018	1014.54581	29846.28	-5.2605	-0.0026738	0.30691	0.000156	-4.9536	-0.0025178	508.280133669826	40.471	0.33092	40.471	40.33	40.661	0					16	9	2	0	0	0	0.00047662	1	4450	147.19
DLVAIEAK	8	Unmodified	_DLVAIEAK_					0	0	0	0	F1MYC9	F1MYC9	F1MYC9	MULTI-SECPEP	20140904-PurClathDigest-1ug-03	3	858.93	1	858.49311	857.485833	23979.32	-5.597	-0.004805	0.17591	0.00015102	-5.4211	-0.004654	858.493154858618	40.56	0.19717	40.56	40.464	40.661	-3.8147E-06					9	5	2	0	0	0	0.015408	1	4465	69.598
DNLAQDLGTLR	11	Unmodified	_DNLAQDLGTLR_					0	0	0	0	Q28115	Q28115	Q28115	MULTI-MSMS	20140904-PurClathDigest-1ug-02	2	608.32	2	608.320034	1214.62551	27308.41	-4.6231	-0.0028123	1.4021	0.00085295	-3.2209	-0.0019594	608.320309727104	47.052	0.40384	47.052	46.848	47.252	0					24	12	4	0	0	0	1.1789E-08	1	6344	202.03
DNLAQDLGTLR	11	Unmodified	_DNLAQDLGTLR_					0	0	0	0	Q28115	Q28115	Q28115	MULTI-MSMS	20140904-PurClathDigest-1ug-03	3	608.32	2	608.320034	1214.62551	27310.14	-4.4322	-0.0026962	0.70677	0.00042994	-3.7254	-0.0022662	608.320035512421	46.928	0.40908	46.928	46.718	47.127	-3.8147E-06					24	12	4	0	0	0	5.9738E-07	1	6053	189.57
DNNLLGK	7	Unmodified	_DNNLLGK_					0	0	0	0	P19120	P19120	P19120	MULTI-MSMS	20140904-PurClathDigest-1ug-03	3	387.21	2	387.211235	772.407917	34226.57	-6.1695	-0.0023889	-1.3221	-0.00051192	-7.4916	-0.0029008	387.210717031035	36.735	0.34291	36.735	36.55	36.893	0					15	8	2	0	0	0	0.049402	1	3614	79.809
DNNLLGR	7	Unmodified	_DNNLLGR_					0	0	0	0	Q27975;Q27965;P0CB32	Q27975	Q27975	MULTI-MSMS	20140904-PurClathDigest-1ug-03	3	401.21	2	401.214309	800.414065	33423.66	-5.4827	-0.0021997	1.1957	0.00047974	-4.287	-0.00172	401.214448491726	37.988	0.33175	37.988	37.847	38.179	0					15	8	3	0	0	0	0.0069233	1	3882	120.45
DPELWGSVLLESNPYR	16	Unmodified	_DPELWGSVLLESNPYR_					0	0	0	0	P49951	P49951	P49951	MULTI-MSMS	20140904-PurClathDigest-1ug-03	3	937.97	2	937.96779	1873.92103	22358.82	-2.0489	-0.0019218	-0.75953	-0.00071242	-2.8084	-0.0026342	938.468540564078	55.155	0.90625	55.155	54.889	55.795	0					82	24	5	0	0	0	6.997E-05	1	7947	99.344
DPHLACVAYER	11	Unmodified	_DPHLACVAYER_					0	0	0	0	P49951;F1MPU0	P49951	P49951	MULTI-MSMS	20140904-PurClathDigest-1ug-01	1	637.3	2	637.303329	1272.59211	26210.87	-4.8119	-0.0030666	1.007	0.00064176	-3.8049	-0.0024249	637.30431042036	41.391	0.73508	41.391	41.117	41.852	0					49	23	4	0	0	0	0.024478	1	5409	77.062
DQAPEGKDEDLEPK	14	Unmodified	_DQAPEGKDEDLEPK_					0	0	0	1	F1N3M8	F1N3M8	F1N3M8	MULTI-MSMS	20140904-PurClathDigest-1ug-01	1	785.86	2	785.865199	1569.71585	23342.66	-6.2975	-0.004949	-2.8679	-0.0022538	-9.1654	-0.0072028	786.364884089344	33.626	0.80425	33.626	33.271	34.075	0					67	25	4	0	0	0	0.0010742	2	3462	102.39
DQAPEGKDEDLEPK	14	Unmodified	_DQAPEGKDEDLEPK_					0	0	0	1	F1N3M8	F1N3M8	F1N3M8	MULTI-MSMS	20140904-PurClathDigest-1ug-02	2	785.86	2	785.865199	1569.71585	23665.3	-5.4674	-0.0042966	-2.5273	-0.0019861	-7.9947	-0.0062828	785.864990813023	33.869	0.799	33.869	33.451	34.25	3.8147E-06					67	22	5	0	0	0	0.0010154	1	3119	110.84
DQAPEGKDEDLEPK	14	Unmodified	_DQAPEGKDEDLEPK_					0	0	0	1	F1N3M8	F1N3M8	F1N3M8	MULTI-MSMS	20140904-PurClathDigest-1ug-03	3	785.86	2	785.865199	1569.71585	23418.32	-5.9171	-0.0046501	-1.4845	-0.0011666	-7.4016	-0.0058167	785.86491076494	33.9	0.81	33.9	33.497	34.307	0					73	22	5	0	0	0	0.0018575	1	2954	101.53
DQAPEGKDEDLEPK	14	Unmodified	_DQAPEGKDEDLEPK_					0	0	0	1	F1N3M8	F1N3M8	F1N3M8	MULTI-SECPEP	20140904-PurClathDigest-1ug-03	3	524.57	3	524.245892	1569.71585	29026.25	-5.6133	-0.0029427	0.38346	0.00020103	-5.2298	-0.0027417	524.246414001589	33.839	0.70567	33.839	33.378	34.084	0					32	19	3	0	0	0	0.048225	1	2962	55.755
DQAPERKDEDLEPK	14	Unmodified	_DQAPERKDEDLEPK_					0	0	0	2	F1N3M8;G3MYP5	F1N3M8;G3MYP5	G3MYP5	MULTI-MSMS	20140904-PurClathDigest-1ug-01	1	557.27	3	557.272441	1668.79549	28286.18	-6.5159	-0.0036311	-0.38936	-0.00021698	-6.9053	-0.0038481	557.272235645273	32.255	0.55342	32.255	31.905	32.458	0					62	17	5	0	0	0	0.017471	1	3043	81.185
DQAPERKDEDLEPK	14	Unmodified	_DQAPERKDEDLEPK_					0	0	0	2	F1N3M8;G3MYP5	F1N3M8;G3MYP5	G3MYP5	MULTI-MSMS	20140904-PurClathDigest-1ug-01	1	835.4	2	835.405023	1668.79549	23715.84	-6.5338	-0.0054584	0.14314	0.00011958	-6.3907	-0.0053388	835.405124011839	32.255	0.459	32.255	31.97	32.429	0					47	14	5	0	0	0	0.003814	1	3062	144.8
DQAPERKDEDLEPK	14	Unmodified	_DQAPERKDEDLEPK_					0	0	0	2	F1N3M8;G3MYP5	F1N3M8;G3MYP5	G3MYP5	MULTI-MSMS	20140904-PurClathDigest-1ug-02	2	557.27	3	557.272441	1668.79549	28360.88	-6.4405	-0.0035891	-0.021953	-1.2234E-05	-6.4625	-0.0036014	557.272527055309	32.348	0.62117	32.348	32.015	32.636	3.8147E-06					64	17	5	0	0	0	0.0089937	1	2766	85.909
DQAPERKDEDLEPK	14	Unmodified	_DQAPERKDEDLEPK_					0	0	0	2	F1N3M8;G3MYP5	F1N3M8;G3MYP5	G3MYP5	MULTI-MSMS	20140904-PurClathDigest-1ug-03	3	557.27	3	557.272441	1668.79549	28158.94	-6.6073	-0.0036821	-0.26895	-0.00014988	-6.8763	-0.003832	557.272384580294	32.434	0.65016	32.434	32.068	32.718	-3.8147E-06					74	17	6	0	0	0	0.00061394	1	2621	120.21
DQASEGKDEDLEPK	14	Unmodified	_DQASEGKDEDLEPK_					0	0	0	1	G3MYP5	G3MYP5	G3MYP5	MULTI-MSMS	20140904-PurClathDigest-1ug-01	1	780.85	2	780.854832	1559.69511	23961.12	-6.2015	-0.0048425	0.34184	0.00026693	-5.8597	-0.0045756	780.855271926532	33.156	1.1192	33.156	32.667	33.786	0					96	35	5	0	0	0	2.068E-05	2	3244	152.11
DQASEGKDEDLEPK	14	Unmodified	_DQASEGKDEDLEPK_					0	0	0	1	G3MYP5	G3MYP5	G3MYP5	MULTI-MSMS	20140904-PurClathDigest-1ug-01	1	520.9	3	520.905647	1559.69511	29352.04	-6.0954	-0.0031751	0.50342	0.00026224	-5.592	-0.0029129	520.906164782892	33.173	0.84275	33.173	32.698	33.541	0					83	26	5	0	0	0	0.013737	1	3261	80.632
DQASEGKDEDLEPK	14	Unmodified	_DQASEGKDEDLEPK_					0	0	0	1	G3MYP5	G3MYP5	G3MYP5	MULTI-MSMS	20140904-PurClathDigest-1ug-02	2	780.85	2	780.854832	1559.69511	23929.96	-5.6932	-0.0044456	0.36621	0.00028595	-5.327	-0.0041596	780.855278564537	33.343	1.1324	33.343	32.892	34.024	0					97	31	5	0	0	0	1.4103E-12	2	2968	199.03
DQASEGKDEDLEPK	14	Unmodified	_DQASEGKDEDLEPK_					0	0	0	1	G3MYP5	G3MYP5	G3MYP5	MULTI-MSMS	20140904-PurClathDigest-1ug-02	2	520.9	3	520.905647	1559.69511	29424.68	-5.5741	-0.0029036	0.6128	0.00031921	-4.9613	-0.0025844	520.906209148387	33.365	0.802	33.365	32.925	33.727	0					79	21	5	0	0	0	0.010528	1	2983	73.722
DQASEGKDEDLEPK	14	Unmodified	_DQASEGKDEDLEPK_					0	0	0	1	G3MYP5	G3MYP5	G3MYP5	MULTI-MSMS	20140904-PurClathDigest-1ug-03	3	780.85	2	780.854832	1559.69511	23991.57	-6.525	-0.0050951	1.173	0.0009159	-5.3521	-0.0041792	780.855950274648	33.417	1.0971	33.417	32.987	34.084	0					81	29	5	0	0	0	2.068E-05	1	2814	152.11
DQASEGKDEDLEPK	14	Unmodified	_DQASEGKDEDLEPK_					0	0	0	1	G3MYP5	G3MYP5	G3MYP5	MULTI-MSMS	20140904-PurClathDigest-1ug-03	3	520.9	3	520.905647	1559.69511	29265.07	-5.7834	-0.0030126	0.90538	0.00047162	-4.878	-0.002541	520.906334929906	33.437	0.98849	33.437	33.062	34.05	0					84	26	5	0	0	0	0.0016493	1	2828	98.943
DQASEGKDEDLEPKDR	16	Unmodified	_DQASEGKDEDLEPKDR_					0	0	0	2	G3MYP5	G3MYP5	G3MYP5	MULTI-SECPEP	20140904-PurClathDigest-1ug-02	2	610.79	3	611.281665	1830.82316	26978.83	-6.6391	-0.0040584	-0.70987	-0.00043393	-7.349	-0.0044923	611.281889259933	32.362	0.60867	32.362	32.089	32.698	0					57	17	5	0	0	0	0.038102	1	2776	81.713
DQGGAGEGLVR	11	Unmodified	_DQGGAGEGLVR_					0	0	0	0	F1MEW3	F1MEW3	F1MEW3	MULTI-MSMS	20140904-PurClathDigest-1ug-01	1	529.76	2	529.764894	1057.51524	29715.38	-6.7711	-0.0035871	-0.60753	-0.00032185	-7.3787	-0.003909	529.764521001582	35.686	0.55583	35.686	35.439	35.995	0					37	16	3	0	0	0	0.0054836	1	3930	104.14
DQGGAGEGLVR	11	Unmodified	_DQGGAGEGLVR_					0	0	0	0	F1MEW3	F1MEW3	F1MEW3	MULTI-MSMS	20140904-PurClathDigest-1ug-02	2	529.76	2	529.764894	1057.51524	29454.06	-6.7199	-0.00356	-0.99683	-0.00052808	-7.7167	-0.0040881	529.764371864684	35.851	0.42842	35.851	35.657	36.085	0					28	12	3	0	0	0	7.8047E-06	1	3567	148.28
DQGGAGEGLVR	11	Unmodified	_DQGGAGEGLVR_					0	0	0	0	F1MEW3	F1MEW3	F1MEW3	MULTI-MSMS	20140904-PurClathDigest-1ug-03	3	529.76	2	529.764894	1057.51524	29337.55	-7.0123	-0.0037149	-1.0741	-0.00056903	-8.0864	-0.0042839	529.764231487081	35.806	0.41508	35.806	35.608	36.023	-3.8147E-06					28	11	3	0	0	0	5.1675E-06	1	3386	153.88
DQLQTFSEEHPVLLTEAPLNPR	22	Unmodified	_DQLQTFSEEHPVLLTEAPLNPR_					0	0	0	0	F2Z4F0	F2Z4F0	F2Z4F0	MULTI-MSMS	20140904-PurClathDigest-1ug-03	3	845.77	3	845.434365	2533.28127	23083.44	-3.6013	-0.0030447	0.26936	0.00022772	-3.332	-0.002817	845.769446468073	48.85	0.62309	48.85	48.544	49.167	0					64	17	6	0	0	0	0.048122	1	6513	29.842
DRGPDSGAETEEEKDTWEEK	20	Unmodified	_DRGPDSGAETEEEKDTWEEK_					0	0	0	2	F1N3M8;G3MYP5	F1N3M8;G3MYP5	G3MYP5	MULTI-MSMS	20140904-PurClathDigest-1ug-01	1	770.33	3	769.999774	2306.97749	24123.07	-5.1215	-0.0039436	-0.051	-3.927E-05	-5.1725	-0.0039829	770.334062330852	36.105	0.66008	36.105	35.898	36.558	0					87	20	6	0	0	0	1.6043E-13	1	4018	196.76
DRGPDSGAETEEEKDTWEEK	20	Unmodified	_DRGPDSGAETEEEKDTWEEK_					0	0	0	2	F1N3M8;G3MYP5	F1N3M8;G3MYP5	G3MYP5	MULTI-MSMS	20140904-PurClathDigest-1ug-01	1	577.75	4	577.75165	2306.97749	27453.82	-5.5927	-0.0032312	0.58866	0.0003401	-5.004	-0.0028911	577.751952976201	36.104	0.34167	36.104	35.931	36.272	0					44	10	5	0	0	0	3.4081E-07	1	4044	153.25
DRGPDSGAETEEEKDTWEEK	20	Unmodified	_DRGPDSGAETEEEKDTWEEK_					0	0	0	2	F1N3M8;G3MYP5	F1N3M8;G3MYP5	G3MYP5	MULTI-MSMS	20140904-PurClathDigest-1ug-02	2	770.33	3	769.999774	2306.97749	24049.46	-4.6478	-0.0035788	-0.32942	-0.00025365	-4.9772	-0.0038324	770.333809898467	36.322	0.65458	36.322	36.119	36.774	0					79	18	7	0	0	0	5.9907E-23	1	3687	254.39
DRGPDSGAETEEEKDTWEEK	20	Unmodified	_DRGPDSGAETEEEKDTWEEK_					0	0	0	2	F1N3M8;G3MYP5	F1N3M8;G3MYP5	G3MYP5	MULTI-MSMS	20140904-PurClathDigest-1ug-02	2	578	4	577.75165	2306.97749	27068.47	-4.8547	-0.0028048	-0.14078	-8.1335E-05	-4.9955	-0.0028862	578.002384440107	36.319	0.44525	36.319	36.153	36.598	0					47	12	6	0	0	0	9.5021E-07	1	3701	150.69
DRGPDSGAETEEEKDTWEEK	20	Unmodified	_DRGPDSGAETEEEKDTWEEK_					0	0	0	2	F1N3M8;G3MYP5	F1N3M8;G3MYP5	G3MYP5	MULTI-MSMS	20140904-PurClathDigest-1ug-02	2	1155	2	1154.49602	2306.97749	19627.81	-5.3497	-0.0061762	0.3142	0.00036275	-5.0355	-0.0058134	1154.99784084048	36.312	0.44525	36.312	36.153	36.598	3.8147E-06					45	12	5	0	0	0	0.0096112	1	3716	112.36
DRGPDSGAETEEEKDTWEEK	20	Unmodified	_DRGPDSGAETEEEKDTWEEK_					0	0	0	2	F1N3M8;G3MYP5	F1N3M8;G3MYP5	G3MYP5	MULTI-MSMS	20140904-PurClathDigest-1ug-03	3	770	3	769.999774	2306.97749	24109.52	-5.4977	-0.0042332	-0.35409	-0.00027265	-5.8518	-0.0045059	770.333814470448	36.194	0.66734	36.194	35.989	36.657	0					79	18	7	0	0	0	3.4017E-22	1	3476	237.76
DRGPDSGAETEEEKDTWEEK	20	Unmodified	_DRGPDSGAETEEEKDTWEEK_					0	0	0	2	F1N3M8;G3MYP5	F1N3M8;G3MYP5	G3MYP5	MULTI-MSMS	20140904-PurClathDigest-1ug-03	3	578	4	577.75165	2306.97749	27787.46	-5.813	-0.0033584	-0.31498	-0.00018198	-6.1279	-0.0035404	578.002211783684	36.193	0.52684	36.193	36.023	36.55	0					37	14	4	0	0	0	0.025945	1	3484	69.765
DRGPDSGAETEEEKDTWEEK	20	Unmodified	_DRGPDSGAETEEEKDTWEEK_					0	0	0	2	F1N3M8;G3MYP5	F1N3M8;G3MYP5	G3MYP5	MULTI-MSMS	20140904-PurClathDigest-1ug-03	3	1154.99	2	1154.49602	2306.97749	19547.69	-6.4777	-0.0074785	0.30053	0.00034696	-6.1772	-0.0071316	1154.99773817347	36.178	0.37767	36.178	36.023	36.4	0					36	10	6	0	0	0	1.1973E-07	1	3492	155.76
DSLYKDAMQYASESK	15	Oxidation (M)	_DSLYKDAM(ox)QYASESK_		DSLYKDAM(1)QYASESK		DSLYKDAM(123.76)QYASESK	0	0	1	1	P49951;F1MPU0	P49951	P49951	MULTI-MSMS	20140904-PurClathDigest-1ug-01	1	876.39	2	876.393267	1750.77198	22269.59	-5.6605	-0.0049608	0.33278	0.00029165	-5.3277	-0.0046692	876.394252928862	42.462	0.57075	42.462	42.209	42.78	0					55	18	4	0	0	0	0.00033024	1	5660	123.76
DSLYKDAMQYASESK	15	Oxidation (M)	_DSLYKDAM(ox)QYASESK_		DSLYKDAM(1)QYASESK		DSLYKDAM(126.91)QYASESK	0	0	1	1	P49951;F1MPU0	P49951	P49951	MULTI-MSMS	20140904-PurClathDigest-1ug-02	2	876.39	2	876.393267	1750.77198	22423.17	-4.4181	-0.003872	-0.092937	-8.1449E-05	-4.511	-0.0039534	876.393402145307	42.627	0.47358	42.627	42.406	42.88	0					47	14	4	0	0	0	0.00027191	1	5214	126.91
DSLYKDAMQYASESK	15	Oxidation (M)	_DSLYKDAM(ox)QYASESK_		DSLYKDAM(1)QYASESK		DSLYKDAM(154.46)QYASESK	0	0	1	1	P49951;F1MPU0	P49951	P49951	MULTI-MSMS	20140904-PurClathDigest-1ug-03	3	876.89	2	876.393267	1750.77198	22155.24	-5.1221	-0.0044889	0.060924	5.3393E-05	-5.0611	-0.0044356	876.393668698929	42.683	0.45942	42.683	42.437	42.897	0					47	13	4	0	0	0	1.1836E-05	1	4974	154.46
DSSKVEEPQKDQPDK	15	Unmodified	_DSSKVEEPQKDQPDK_					0	0	0	2	F1MEW3	F1MEW3	F1MEW3	MULTI-MSMS	20140904-PurClathDigest-1ug-01	1	577.28	3	577.279484	1728.81662	27735.19	-6.3915	-0.0036897	-0.043855	-2.5316E-05	-6.4354	-0.003715	577.279467817512	30.618	0.587	30.618	30.454	31.041	0					62	18	6	0	0	0	5.6761E-30	1	2629	314.51
DSSKVEEPQKDQPDK	15	Unmodified	_DSSKVEEPQKDQPDK_					0	0	0	2	F1MEW3	F1MEW3	F1MEW3	MULTI-MSMS	20140904-PurClathDigest-1ug-01	1	865.41	2	865.415588	1728.81662	23096.67	-5.9557	-0.0051541	0.48108	0.00041634	-5.4746	-0.0047378	865.415902406222	30.619	0.36658	30.619	30.484	30.851	1.9073E-06					40	11	6	0	0	0	5.9496E-11	1	2632	222.88
DSSKVEEPQKDQPDK	15	Unmodified	_DSSKVEEPQKDQPDK_					0	0	0	2	F1MEW3	F1MEW3	F1MEW3	MULTI-MSMS	20140904-PurClathDigest-1ug-02	2	577.28	3	577.279484	1728.81662	27524.15	-5.2732	-0.0030441	-0.053386	-3.0819E-05	-5.3266	-0.0030749	577.279543296438	30.585	0.7605	30.585	30.45	31.21	-1.9073E-06					58	21	6	0	0	0	2.3889E-30	1	2366	325.77
DSSKVEEPQKDQPDK	15	Unmodified	_DSSKVEEPQKDQPDK_					0	0	0	2	F1MEW3	F1MEW3	F1MEW3	MULTI-MSMS	20140904-PurClathDigest-1ug-02	2	865.41	2	865.415588	1728.81662	22836.04	-5.4017	-0.0046747	0.96627	0.00083623	-4.4355	-0.0038385	865.416451048625	30.58	0.29258	30.58	30.45	30.742	-1.9073E-06					28	8	5	0	0	0	3.2714E-07	1	2373	182.57
DSSKVEEPQKDQPDK	15	Unmodified	_DSSKVEEPQKDQPDK_					0	0	0	2	F1MEW3	F1MEW3	F1MEW3	MULTI-MSMS	20140904-PurClathDigest-1ug-03	3	577.28	3	577.279484	1728.81662	27548.96	-5.1737	-0.0029867	0.027794	1.6045E-05	-5.1459	-0.0029706	577.279573301807	30.593	0.75492	30.593	30.437	31.191	0					56	20	6	0	0	0	3.0973E-17	1	2233	264.57
DSSKVEEPQKDQPDK	15	Unmodified	_DSSKVEEPQKDQPDK_					0	0	0	2	F1MEW3	F1MEW3	F1MEW3	MULTI-MSMS	20140904-PurClathDigest-1ug-03	3	865.41	2	865.415588	1728.81662	23091.69	-5.1216	-0.0044323	1.0759	0.00093114	-4.0457	-0.0035012	865.416327212434	30.591	0.305	30.591	30.469	30.774	1.9073E-06					24	8	5	0	0	0	8.3494E-12	1	2242	229.39
DSYVGDEAQSK	11	Unmodified	_DSYVGDEAQSK_					0	0	0	0	P63258;P60712;F1MRD0	P63258	P63258	MULTI-MSMS	20140904-PurClathDigest-1ug-01	1	599.76	2	599.764757	1197.51496	27324.68	-6.1894	-0.0037122	-0.0021882	-1.3124E-06	-6.1916	-0.0037135	599.764661492233	33.596	0.30416	33.596	33.451	33.755	0					26	9	4	0	0	0	0.00022886	1	3403	126.19
DSYVGDEAQSK	11	Unmodified	_DSYVGDEAQSK_					0	0	0	0	P63258;P60712;F1MRD0	P63258	P63258	MULTI-MSMS	20140904-PurClathDigest-1ug-02	2	599.76	2	599.764757	1197.51496	27169.39	-5.5157	-0.0033081	-0.78114	-0.0004685	-6.2968	-0.0037766	599.764175457282	33.826	0.33033	33.826	33.66	33.991	0					27	9	4	0	0	0	0.00040717	1	3117	117.25
DSYVGDEAQSKR	12	Unmodified	_DSYVGDEAQSKR_					0	0	0	1	P63258;P60712;F1MRD0	P63258	P63258	MULTI-MSMS	20140904-PurClathDigest-1ug-01	1	677.81	2	677.815313	1353.61607	26922.84	-6.7877	-0.0046008	0.30365	0.00020582	-6.484	-0.004395	677.816319702965	32.496	0.23758	32.496	32.369	32.607	0					28	7	5	0	0	0	3.4426E-08	1	3122	211.37
DSYVGDEAQSKR	12	Unmodified	_DSYVGDEAQSKR_					0	0	0	1	P63258;P60712;F1MRD0	P63258	P63258	MULTI-MSMS	20140904-PurClathDigest-1ug-02	2	677.81	2	677.815313	1353.61607	26071.74	-6.4628	-0.0043806	0.11022	7.471E-05	-6.3525	-0.0043058	677.815754415932	32.647	0.29492	32.647	32.5	32.795	0					28	8	5	0	0	0	1.9073E-06	1	2840	197.07
DSYVGDEAQSKR	12	Unmodified	_DSYVGDEAQSKR_					0	0	0	1	P63258;P60712;F1MRD0	P63258	P63258	MULTI-MSMS	20140904-PurClathDigest-1ug-03	3	677.81	2	677.815313	1353.61607	26885.82	-6.4971	-0.0044038	0.19744	0.00013383	-6.2996	-0.00427	677.815909803035	32.733	0.27158	32.733	32.579	32.851	0					23	7	4	0	0	0	3.9698E-07	1	2699	205.56
DTAPDQKDQAPEGKDEDLEPK	21	Unmodified	_DTAPDQKDQAPEGKDEDLEPK_					0	0	0	2	F1N3M8	F1N3M8	F1N3M8	MULTI-MSMS	20140904-PurClathDigest-1ug-01	1	776.36	3	776.027553	2325.06083	24048.62	-6.0574	-0.0047007	0.09118	7.0758E-05	-5.9662	-0.0046299	776.361938919982	33.596	0.86583	33.596	33.179	34.044	0					112	27	7	0	0	0	0.00045207	1	3382	91.964
DTAPDQKDQAPEGKDEDLEPK	21	Unmodified	_DTAPDQKDQAPEGKDEDLEPK_					0	0	0	2	F1N3M8	F1N3M8	F1N3M8	MULTI-MSMS	20140904-PurClathDigest-1ug-01	1	1164.03	2	1163.53769	2325.06083	19908.28	-6.6793	-0.0077716	0.6278	0.00073047	-6.0515	-0.0070411	1164.03974970838	33.591	0.61842	33.591	33.271	33.89	3.8147E-06					72	19	6	0	0	0	0.0039674	1	3397	95.195
DTAPDQKDQAPEGKDEDLEPK	21	Unmodified	_DTAPDQKDQAPEGKDEDLEPK_					0	0	0	2	F1N3M8	F1N3M8	F1N3M8	MULTI-MSMS	20140904-PurClathDigest-1ug-01	1	582.27	4	582.272484	2325.06083	27827.7	-6.0099	-0.0034994	0.63231	0.00036818	-5.3776	-0.0031312	582.523612585916	33.578	0.77417	33.578	33.083	33.857	0					82	24	6	0	0	0	0.024919	1	3398	74.703
DTAPDQKDQAPEGKDEDLEPK	21	Unmodified	_DTAPDQKDQAPEGKDEDLEPK_					0	0	0	2	F1N3M8	F1N3M8	F1N3M8	MULTI-MSMS	20140904-PurClathDigest-1ug-02	2	776.36	3	776.027553	2325.06083	24128.71	-5.474	-0.004248	-0.15779	-0.00012245	-5.6318	-0.0043704	776.361828289401	33.829	0.948	33.829	33.375	34.323	0					118	26	7	0	0	0	1.6961E-06	1	3096	121.46
DTAPDQKDQAPEGKDEDLEPK	21	Unmodified	_DTAPDQKDQAPEGKDEDLEPK_					0	0	0	2	F1N3M8	F1N3M8	F1N3M8	MULTI-MSMS	20140904-PurClathDigest-1ug-02	2	582.52	4	582.272484	2325.06083	27226.91	-5.3592	-0.0031205	0.58976	0.0003434	-4.7695	-0.0027771	582.523705836034	33.818	0.91525	33.818	33.3	34.215	3.8147E-06					86	25	6	0	0	0	0.036898	1	3120	65.149
DTAPDQKDQAPEGKDEDLEPK	21	Unmodified	_DTAPDQKDQAPEGKDEDLEPK_					0	0	0	2	F1N3M8	F1N3M8	F1N3M8	MULTI-MSMS	20140904-PurClathDigest-1ug-03	3	776.36	3	776.027553	2325.06083	24062.07	-6.0116	-0.0046652	0.036942	2.8668E-05	-5.9747	-0.0046365	776.36188300733	33.878	1.1637	33.878	33.455	34.619	3.8147E-06					124	32	7	0	0	0	0.00022365	1	2931	103.4
DTAPDQKDQAPEGKDEDLEPK	21	Unmodified	_DTAPDQKDQAPEGKDEDLEPK_					0	0	0	2	F1N3M8	F1N3M8	F1N3M8	MULTI-MSMS	20140904-PurClathDigest-1ug-03	3	582.52	4	582.272484	2325.06083	27494.09	-5.4034	-0.0031463	0.5759	0.00033533	-4.8275	-0.0028109	582.5236476235	33.87	0.89266	33.87	33.378	34.271	0					73	24	6	0	0	0	0.00042519	1	2955	91.276
DTELAEELLQWFLQEEKR	18	Unmodified	_DTELAEELLQWFLQEEKR_					0	0	0	1	P49951;F1MPU0	P49951	P49951	MULTI-MSMS	20140904-PurClathDigest-1ug-01	1	760.05	3	759.718102	2276.13248	24310.85	-2.2876	-0.0017379	0.30228	0.00022965	-1.9853	-0.0015083	760.052602911787	58.285	2.7965	58.285	57.812	60.609	0					197	49	5	0	0	0	1.4169E-08	3	9568	136.34
DTELAEELLQWFLQEEKR	18	Unmodified	_DTELAEELLQWFLQEEKR_					0	0	0	1	P49951;F1MPU0	P49951	P49951	MULTI-MSMS	20140904-PurClathDigest-1ug-02	2	760.05	3	759.718102	2276.13248	24278.83	-1.4911	-0.0011328	0.0031486	2.392E-06	-1.488	-0.0011304	760.052506780997	58.068	1.4391	58.068	57.877	59.316	0					104	24	5	0	0	0	8.4836E-09	2	8768	135.09
DTELAEELLQWFLQEEKR	18	Unmodified	_DTELAEELLQWFLQEEKR_					0	0	0	1	P49951;F1MPU0	P49951	P49951	MULTI-MSMS	20140904-PurClathDigest-1ug-03	3	760.05	3	759.718102	2276.13248	24258.44	-1.891	-0.0014366	0.30579	0.00023231	-1.5852	-0.0012043	760.05272596594	58.087	1.5589	58.087	57.802	59.361	3.8147E-06					110	25	5	0	0	0	4.8653E-06	2	8449	119.46
DTELAEELLQWFLQEEKR	18	Deamidation (NQ)	_DTELAEELLQ(de)WFLQEEKR_	DTELAEELLQ(0.987)WFLQ(0.013)EEKR		DTELAEELLQ(18.9)WFLQ(-18.9)EEKR		0	1	0	1	P49951;F1MPU0	P49951	P49951	MSMS	20140904-PurClathDigest-1ug-02	2	1139.58	2	1139.56552	2277.11649	NaN	NaN	NaN	NaN	NaN	NaN	NaN	NaN	58.774	1	58.774	58.274	59.274	3.8147E-06								0	0	0	9.5487E-05	1	8877	117.18
DTVSPVLDEK	10	Unmodified	_DTVSPVLDEK_					0	0	0	0	F1N1S2	F1N1S2	F1N1S2	MULTI-MSMS	20140904-PurClathDigest-1ug-02	2	551.78	2	551.784961	1101.55537	27459.54	-5.1094	-0.0028193	0.36216	0.00019984	-4.7472	-0.0026194	551.7852381877	38.727	0.7185	38.727	38.474	39.193	0					44	20	4	0	0	0	0.0035264	1	4270	101.48
DTVSPVLDEK	10	Unmodified	_DTVSPVLDEK_					0	0	0	0	F1N1S2	F1N1S2	F1N1S2	MULTI-MSMS	20140904-PurClathDigest-1ug-03	3	551.78	2	551.784961	1101.55537	27711.98	-4.467	-0.0024648	0.14762	8.1457E-05	-4.3194	-0.0023834	551.784964821851	38.865	0.39925	38.865	38.643	39.042	0					28	10	4	0	0	0	0.0012927	1	4084	117.28
DVAEEIANYRPTIDSLHEQASALPQEHAESPDVQGR	36	Unmodified	_DVAEEIANYRPTIDSLHEQASALPQEHAESPDVQGR_					0	0	0	1	F1MYC9	F1MYC9	F1MYC9	MULTI-MSMS	20140904-PurClathDigest-1ug-01	1	994.47	4	993.979418	3971.88857	21515.44	-4.0951	-0.0040705	0.53528	0.00053206	-3.5599	-0.0035384	994.481295861741	46.707	0.44941	46.707	46.426	46.875	0					64	14	6	0	0	0	8.5608E-06	1	6843	101.21
DVAEEIANYRPTIDSLHEQASALPQEHAESPDVQGR	36	Unmodified	_DVAEEIANYRPTIDSLHEQASALPQEHAESPDVQGR_					0	0	0	1	F1MYC9	F1MYC9	F1MYC9	MULTI-MSMS	20140904-PurClathDigest-1ug-02	2	994.48	4	993.979418	3971.88857	21134.03	-4.93	-0.0049003	1.5816	0.001572	-3.3484	-0.0033282	994.48222209669	46.929	0.3705	46.929	46.724	47.095	0					53	11	8	0	0	0	4.6846E-06	1	6314	106.3
DVAEEIANYRPTIDSLHEQASALPQEHAESPDVQGR	36	Unmodified	_DVAEEIANYRPTIDSLHEQASALPQEHAESPDVQGR_					0	0	0	1	F1MYC9	F1MYC9	F1MYC9	MULTI-MSMS	20140904-PurClathDigest-1ug-03	3	994.48	4	993.979418	3971.88857	20964.38	-4.4676	-0.0044407	-0.34657	-0.00034448	-4.8141	-0.0047851	994.48038039335	46.718	0.376	46.718	46.496	46.872	3.8147E-06					53	11	7	0	0	0	0.0069952	1	6012	79.616
DVDGATLAR	9	Unmodified	_DVDGATLAR_					0	0	0	0	Q08DH7	Q08DH7	Q08DH7	MULTI-MSMS	20140904-PurClathDigest-1ug-01	1	459.23	2	459.237981	916.461409	24419.93	-6.9533	-0.0031932	-0.61089	-0.00028055	-7.5642	-0.0034738	459.2379672102	35.44	1.1452	35.44	35.192	36.337	0					64	35	4	0	0	0	0.014441	1	3856	94.309
DVDGATLAR	9	Unmodified	_DVDGATLAR_					0	0	0	0	Q08DH7	Q08DH7	Q08DH7	MULTI-MSMS	20140904-PurClathDigest-1ug-02	2	459.24	2	459.237981	916.461409	30736.69	-7.1315	-0.0032751	0.29543	0.00013567	-6.8361	-0.0031394	459.238063016657	35.688	0.81792	35.688	35.53	36.348	3.8147E-06					52	24	5	0	0	0	0.0022787	1	3538	119.07
DVDGATLAR	9	Unmodified	_DVDGATLAR_					0	0	0	0	Q08DH7	Q08DH7	Q08DH7	MULTI-MSMS	20140904-PurClathDigest-1ug-03	3	459.24	2	459.237981	916.461409	30737.71	-7.5522	-0.0034683	0.66327	0.0003046	-6.8889	-0.0031637	459.238241948291	35.643	1.1121	35.643	35.51	36.622	-3.8147E-06					55	31	5	0	0	0	0.00048849	1	3354	137.14
DVLEDIPK	8	Unmodified	_DVLEDIPK_					0	0	0	0	F1MEW3	F1MEW3	F1MEW3	MULTI-SECPEP	20140904-PurClathDigest-1ug-01	1	928.9	1	928.498589	927.491313	20770.16	-4.1039	-0.0038105	0.94206	0.0008747	-3.1619	-0.0029358	928.498180434946	43.931	0.44475	43.931	43.64	44.085	0					25	14	3	0	0	0	0.01744	1	6099	62.464
DVLEDIPKWEGK	12	Unmodified	_DVLEDIPKWEGK_					0	0	0	1	F1MEW3	F1MEW3	F1MEW3	MULTI-MSMS	20140904-PurClathDigest-1ug-01	1	714.87	2	714.872099	1427.72965	24778.75	-3.9876	-0.0028506	0.45986	0.00032874	-3.5277	-0.0025219	714.872302741378	46.539	0.48492	46.539	46.241	46.726	0					53	15	5	0	0	0	5.5595E-05	1	6782	147.72
DVLEDIPKWEGK	12	Unmodified	_DVLEDIPKWEGK_					0	0	0	1	F1MEW3	F1MEW3	F1MEW3	MULTI-MSMS	20140904-PurClathDigest-1ug-02	2	714.87	2	714.872099	1427.72965	25286.31	-4.6522	-0.0033258	1.3031	0.00093156	-3.3491	-0.0023942	714.87315133615	46.867	0.49592	46.867	46.539	47.035	0					45	15	4	0	0	0	8.3802E-05	1	6303	130.69
DVNAAIATIK	10	Unmodified	_DVNAAIATIK_					0	0	0	0	Q2HJ86;F2Z4C1;F6RP72;F2Z4K0;Q32KN8;Q3ZCJ7;F1MNF8	Q2HJ86	Q2HJ86	MULTI-MSMS	20140904-PurClathDigest-1ug-01	1	508.29	2	508.292756	1014.57096	29699.72	-5.3434	-0.002716	-0.0077982	-3.9638E-06	-5.3512	-0.00272	508.292721621284	41.44	0.333	41.44	41.299	41.632	0					28	10	4	0	0	0	0.040591	1	5421	75.819
DVNAAIATIK	10	Unmodified	_DVNAAIATIK_					0	0	0	0	Q2HJ86;F2Z4C1;F6RP72;F2Z4K0;Q32KN8;Q3ZCJ7;F1MNF8	Q2HJ86	Q2HJ86	MULTI-MSMS	20140904-PurClathDigest-1ug-02	2	508.29	2	508.292756	1014.57096	29183.21	-5.3312	-0.0027098	-0.23357	-0.00011872	-5.5648	-0.0028285	508.292610004002	41.703	0.32675	41.703	41.569	41.896	3.8147E-06					24	9	4	0	0	0	0.01761	1	4984	89.731
DVNAAIATIK	10	Unmodified	_DVNAAIATIK_					0	0	0	0	Q2HJ86;F2Z4C1;F6RP72;F2Z4K0;Q32KN8;Q3ZCJ7;F1MNF8	Q2HJ86	Q2HJ86	MULTI-MSMS	20140904-PurClathDigest-1ug-03	3	508.29	2	508.292756	1014.57096	29175.46	-5.3919	-0.0027407	0.062307	3.167E-05	-5.3296	-0.002709	508.292811024473	41.686	0.35875	41.686	41.502	41.861	0					29	10	4	0	0	0	0.010023	1	4745	94.363
DVSSVELLMNNHQGIK	16	Oxidation (M)	_DVSSVELLM(ox)NNHQGIK_		DVSSVELLM(1)NNHQGIK		DVSSVELLM(188.4)NNHQGIK	0	0	1	0	F1MYC9	F1MYC9	F1MYC9	MULTI-MSMS	20140904-PurClathDigest-1ug-01	1	900.45	2	900.45145	1798.88835	22127.45	-4.8395	-0.0043577	-1.3396	-0.0012062	-6.1791	-0.0055639	900.450532917823	41.184	0.37483	41.184	40.985	41.36	0					46	11	5	0	0	0	2.3675E-12	1	5348	188.4
DVSSVELLMNNHQGIK	16	Oxidation (M)	_DVSSVELLM(ox)NNHQGIK_		DVSSVELLM(1)NNHQGIK		DVSSVELLM(204.35)NNHQGIK	0	0	1	0	F1MYC9	F1MYC9	F1MYC9	MULTI-MSMS	20140904-PurClathDigest-1ug-02	2	900.95	2	900.45145	1798.88835	22224.46	-4.1073	-0.0036984	-2.2889	-0.002061	-6.3962	-0.0057595	900.449571552756	41.329	0.32767	41.329	41.175	41.502	3.8147E-06					35	9	4	0	0	0	9.5118E-13	1	4895	204.35
DWFIQMPTEAK	11	Oxidation (M)	_DWFIQM(ox)PTEAK_		DWFIQM(1)PTEAK		DWFIQM(124.42)PTEAK	0	0	1	0	F1MEW3	F1MEW3	F1MEW3	MULTI-MSMS	20140904-PurClathDigest-1ug-01	1	691.32	2	691.32647	1380.63839	24788.61	-4.0208	-0.0027797	-0.55061	-0.00038065	-4.5714	-0.0031603	691.326208179713	46.607	0.4825	46.607	46.334	46.816	3.8147E-06					55	15	5	0	0	0	0.0023391	1	6790	124.42
DWFIQMPTEAK	11	Oxidation (M)	_DWFIQM(ox)PTEAK_		DWFIQM(1)PTEAK		DWFIQM(110.08)PTEAK	0	0	1	0	F1MEW3	F1MEW3	F1MEW3	MULTI-MSMS	20140904-PurClathDigest-1ug-02	2	691.32	2	691.32647	1380.63839	25126.3	-4.8509	-0.0033536	0.72057	0.00049815	-4.1304	-0.0028554	691.326914998108	46.939	0.55883	46.939	46.629	47.188	-3.8147E-06					61	17	5	0	0	0	0.011279	1	6295	110.08
DWFIQMPTEAK	11	Oxidation (M)	_DWFIQM(ox)PTEAK_		DWFIQM(1)PTEAK		DWFIQM(95.48)PTEAK	0	0	1	0	F1MEW3	F1MEW3	F1MEW3	MULTI-MSMS	20140904-PurClathDigest-1ug-03	3	691.32	2	691.32647	1380.63839	24818.21	-4.6285	-0.0031998	-0.54878	-0.00037939	-5.1773	-0.0035792	691.326046695329	46.833	0.6005	46.833	46.527	47.127	0					63	18	5	0	0	0	0.049854	1	6013	95.477
DYQELMNTK	9	Oxidation (M)	_DYQELM(ox)NTK_		DYQELM(1)NTK		DYQELM(126.31)NTK	0	0	1	0	CON__P04264	CON__P04264	CON__P04264	MULTI-MSMS	20140904-PurClathDigest-1ug-01	1	579.26	2	579.260796	1156.50704	27543	-6.4743	-0.0037503	0.34037	0.00019716	-6.134	-0.0035532	579.260858129267	35.776	0.73891	35.776	35.47	36.209	0					49	22	4	0	0	0	0.0052959	2	3924	126.31
DYQELMNTK	9	Oxidation (M)	_DYQELM(ox)NTK_		DYQELM(1)NTK		DYQELM(104.05)NTK	0	0	1	0	CON__P04264	CON__P04264	CON__P04264	MULTI-MSMS	20140904-PurClathDigest-1ug-02	2	579.26	2	579.260796	1156.50704	27854.96	-6.3982	-0.0037062	-0.37727	-0.00021854	-6.7754	-0.0039247	579.260585729113	35.909	0.90117	35.909	35.626	36.527	0					48	26	4	0	0	0	0.023453	2	3648	104.05
DYQELMNTK	9	Oxidation (M)	_DYQELM(ox)NTK_		DYQELM(1)NTK		DYQELM(104.42)NTK	0	0	1	0	CON__P04264	CON__P04264	CON__P04264	MULTI-MSMS	20140904-PurClathDigest-1ug-03	3	579.26	2	579.260796	1156.50704	28291.66	-6.9934	-0.004051	0.19502	0.00011297	-6.7983	-0.003938	579.261119982622	35.762	0.583	35.762	35.543	36.126	0					33	16	4	0	0	0	0.022015	1	3380	104.42
DYQELMNVK	9	Oxidation (M)	_DYQELM(ox)NVK_		DYQELM(1)NVK		DYQELM(98.04)NVK	0	0	1	0	CON__P35908	CON__P35908	CON__P35908	MULTI-MSMS	20140904-PurClathDigest-1ug-02	2	578.27	2	578.271164	1154.52777	27106.09	-5.5957	-0.0032359	0.61828	0.00035753	-4.9775	-0.0028783	578.271546867181	38.62	0.58467	38.62	38.409	38.994	0					42	16	4	0	0	0	0.046606	1	4230	98.044
EAALTSEEVGADLEQVEVLQK	21	Unmodified	_EAALTSEEVGADLEQVEVLQK_					0	0	0	0	E1BFB0	E1BFB0	E1BFB0	MULTI-MSMS	20140904-PurClathDigest-1ug-03	3	1130.08	2	1129.57354	2257.13254	19656.78	-2.9381	-0.0033188	0.52742	0.00059576	-2.4107	-0.0027231	1130.075965991	50.169	0.37959	50.169	49.913	50.293	0					35	11	6	0	0	0	0.048242	1	6845	61.862
EAASELLMR	9	Oxidation (M)	_EAASELLM(ox)R_		EAASELLM(1)R		EAASELLM(98.01)R	0	0	1	0	F1MYC9	F1MYC9	F1MYC9	MULTI-MSMS	20140904-PurClathDigest-1ug-03	3	518.26	2	518.260599	1034.50665	28935.6	-5.4341	-0.0028163	-0.88325	-0.00045775	-6.3174	-0.0032741	518.260406867889	39.577	0.31267	39.577	39.438	39.751	0					14	8	2	0	0	0	0.057762	1	4246	98.009
EAASYQEALAR	11	Unmodified	_EAASYQEALAR_					0	0	0	0	Q28115	Q28115	Q28115	MULTI-MSMS	20140904-PurClathDigest-1ug-01	1	604.8	2	604.798934	1207.58332	26734.52	-6.2945	-0.0038069	0.10153	6.1408E-05	-6.1929	-0.0037455	604.799039492408	38.071	0.87842	38.071	37.905	38.784	3.8147E-06					88	28	5	0	0	0	4.785E-06	1	4522	146.71
EAASYQEALAR	11	Unmodified	_EAASYQEALAR_					0	0	0	0	Q28115	Q28115	Q28115	MULTI-MSMS	20140904-PurClathDigest-1ug-02	2	604.8	2	604.798934	1207.58332	26709.89	-6.5554	-0.0039647	0.40951	0.00024767	-6.1459	-0.003717	604.799257707386	38.272	1.0151	38.272	38.077	39.093	0					89	29	5	0	0	0	1.9729E-06	1	4138	170.02
EAASYQEALAR	11	Unmodified	_EAASYQEALAR_					0	0	0	0	Q28115	Q28115	Q28115	MULTI-MSMS	20140904-PurClathDigest-1ug-03	3	604.8	2	604.798934	1207.58332	26868.62	-6.3481	-0.0038393	0.47402	0.00028669	-5.874	-0.0035526	604.799281511539	38.419	1.1339	38.419	38.179	39.313	0					105	31	6	0	0	0	5.2049E-06	2	4012	150.04
EAEEEEKKDEGAGEEQATK	19	Unmodified	_EAEEEEKKDEGAGEEQATK_					0	0	0	2	P02548	P02548	P02548	MULTI-MSMS	20140904-PurClathDigest-1ug-01	1	703.31	3	702.981832	2105.92367	25110.77	-6.3017	-0.00443	-0.16449	-0.00011563	-6.4662	-0.0045456	703.315993236178	30.763	0.79642	30.763	30.515	31.312	1.9073E-06					74	24	7	0	0	0	6.3978E-09	1	2665	165.3
EAEEEEKKDEGAGEEQATK	19	Unmodified	_EAEEEEKKDEGAGEEQATK_					0	0	0	2	P02548	P02548	P02548	MULTI-MSMS	20140904-PurClathDigest-1ug-01	1	1053.96	2	1053.96911	2105.92367	20653.73	-6.6425	-0.0070009	0.71911	0.00075792	-5.9233	-0.006243	1053.96975602905	30.754	0.43058	30.754	30.547	30.977	1.9073E-06					37	13	4	0	0	0	5.7279E-27	1	2670	277.98
EAEEEEKKDEGAGEEQATK	19	Unmodified	_EAEEEEKKDEGAGEEQATK_					0	0	0	2	P02548	P02548	P02548	MULTI-MSMS	20140904-PurClathDigest-1ug-02	2	702.98	3	702.981832	2105.92367	25438.9	-5.3428	-0.0037559	-0.65791	-0.0004625	-6.0007	-0.0042184	703.315658084568	30.695	0.90292	30.695	30.418	31.321	0					79	25	6	0	0	0	1.0724E-08	1	2394	165.16
EAEEEEKKDEGAGEEQATK	19	Unmodified	_EAEEEEKKDEGAGEEQATK_					0	0	0	2	P02548	P02548	P02548	MULTI-MSMS	20140904-PurClathDigest-1ug-02	2	1054.47	2	1053.96911	2105.92367	20620.05	-5.7807	-0.0060927	0.084479	8.9038E-05	-5.6963	-0.0060037	1054.4705072332	30.689	0.32775	30.689	30.581	30.909	0					29	9	4	0	0	0	1.2579E-07	1	2403	173.87
EAEEEEKKDEGAGEEQATK	19	Unmodified	_EAEEEEKKDEGAGEEQATK_					0	0	0	2	P02548	P02548	P02548	MULTI-MSMS	20140904-PurClathDigest-1ug-03	3	702.98	3	702.981832	2105.92367	25102.55	-5.181	-0.0036422	-1.2158	-0.00085468	-6.3968	-0.0044969	702.981184911422	30.693	0.7225	30.693	30.469	31.191	0					69	19	7	0	0	0	3.4561E-11	1	2256	186.97
EAEEEEKKDEGAGEEQATK	19	Unmodified	_EAEEEEKKDEGAGEEQATK_					0	0	0	2	P02548	P02548	P02548	MULTI-MSMS	20140904-PurClathDigest-1ug-03	3	1054.46	2	1053.96911	2105.92367	20633.59	-5.4867	-0.0057828	-0.6917	-0.00072903	-6.1784	-0.0065118	1054.46981373216	30.685	0.30608	30.685	30.572	30.878	0					28	8	4	0	0	0	4.1968E-17	1	2261	229.48
EAEGLPDRTEAR	12	Unmodified	_EAEGLPDRTEAR_					0	0	0	1	F1N3M8;G3MYP5	F1N3M8;G3MYP5	G3MYP5	MULTI-MSMS	20140904-PurClathDigest-1ug-01	1	672.33	2	672.33113	1342.64771	26110.08	-6.2143	-0.004178	-0.45525	-0.00030608	-6.6695	-0.0044841	672.330660202483	33.239	0.40009	33.239	33.02	33.42	0					45	12	6	0	0	0	6.1216E-07	1	3291	180.47
EAEGLPDRTEAR	12	Unmodified	_EAEGLPDRTEAR_					0	0	0	1	F1N3M8;G3MYP5	F1N3M8;G3MYP5	G3MYP5	MULTI-MSMS	20140904-PurClathDigest-1ug-01	1	448.55	3	448.556512	1342.64771	31796.51	-5.9201	-0.0026555	0.12711	5.7016E-05	-5.793	-0.0025985	448.556656085219	33.236	0.39975	33.236	33.051	33.451	0					42	12	5	0	0	0	0.052905	1	3292	61.344
EAEGLPDRTEAR	12	Unmodified	_EAEGLPDRTEAR_					0	0	0	1	F1N3M8;G3MYP5	F1N3M8;G3MYP5	G3MYP5	MULTI-MSMS	20140904-PurClathDigest-1ug-02	2	672.33	2	672.33113	1342.64771	26109.37	-5.4135	-0.0036397	-0.36085	-0.00024261	-5.7744	-0.0038823	672.330635664911	33.454	0.6625	33.454	33.195	33.858	-3.8147E-06					42	18	4	0	0	0	9.8158E-07	1	3013	188.26
EAEGLPDRTEAR	12	Unmodified	_EAEGLPDRTEAR_					0	0	0	1	F1N3M8;G3MYP5	F1N3M8;G3MYP5	G3MYP5	MULTI-MSMS	20140904-PurClathDigest-1ug-02	2	448.55	3	448.556512	1342.64771	31875.94	-5.2152	-0.0023393	0.17293	7.7567E-05	-5.0423	-0.0022618	448.556711687534	33.449	0.62975	33.449	33.195	33.825	0					52	17	5	0	0	0	0.033764	1	3014	66.267
EAEGLPDRTEAR	12	Unmodified	_EAEGLPDRTEAR_					0	0	0	1	F1N3M8;G3MYP5	F1N3M8;G3MYP5	G3MYP5	MULTI-MSMS	20140904-PurClathDigest-1ug-03	3	672.33	2	672.33113	1342.64771	26145.83	-5.4598	-0.0036708	-0.74772	-0.00050272	-6.2075	-0.0041735	672.330353264018	33.531	0.56867	33.531	33.306	33.875	-3.8147E-06					42	15	6	0	0	0	1.0978E-06	1	2857	174.9
EAEGLPDRTEAR	12	Unmodified	_EAEGLPDRTEAR_					0	0	0	1	F1N3M8;G3MYP5	F1N3M8;G3MYP5	G3MYP5	MULTI-MSMS	20140904-PurClathDigest-1ug-03	3	448.55	3	448.556512	1342.64771	31885.89	-5.4275	-0.0024345	0.25619	0.00011492	-5.1713	-0.0023196	448.556627797093	33.53	0.53925	33.53	33.27	33.809	0					44	14	5	0	0	0	0.0097214	1	2860	80.69
EAEGLPDRTEAREESEPEVK	20	Unmodified	_EAEGLPDRTEAREESEPEVK_					0	0	0	2	F1N3M8;G3MYP5	F1N3M8;G3MYP5	G3MYP5	MULTI-MSMS	20140904-PurClathDigest-1ug-01	1	758.03	3	757.696026	2270.06625	25473.19	-6.5986	-0.0049997	0.34842	0.000264	-6.2501	-0.0047357	758.030595325366	35.064	0.40908	35.064	34.842	35.251	0					29	12	3	0	0	0	2.0223E-06	2	3766	142.23
EAEGLPDRTEAREESEPEVK	20	Unmodified	_EAEGLPDRTEAREESEPEVK_					0	0	0	2	F1N3M8;G3MYP5	F1N3M8;G3MYP5	G3MYP5	MULTI-MSMS	20140904-PurClathDigest-1ug-02	2	758.03	3	757.696026	2270.06625	24764.11	-6.9167	-0.0052407	0.56709	0.00042968	-6.3496	-0.0048111	758.030418463151	35.337	0.69875	35.337	34.958	35.657	0					30	19	2	0	0	0	3.9953E-06	1	3462	114.55
EAEGLPDRTEAREESEPEVK	20	Unmodified	_EAEGLPDRTEAREESEPEVK_					0	0	0	2	F1N3M8;G3MYP5	F1N3M8;G3MYP5	G3MYP5	MULTI-MSMS	20140904-PurClathDigest-1ug-03	3	758.03	3	757.696026	2270.06625	24853.98	-7.9258	-0.0060053	1.1345	0.00085963	-6.7913	-0.0051457	758.031020483496	35.211	0.55991	35.211	34.847	35.407	0					40	15	4	0	0	0	0.00016201	1	3274	97.384
EAFLNTEDKGDSLDSVEALIK	21	Unmodified	_EAFLNTEDKGDSLDSVEALIK_					0	0	0	1	E1BFB0	E1BFB0	E1BFB0	MULTI-MSMS	20140904-PurClathDigest-1ug-03	3	765.72	3	765.384789	2293.13254	24357.53	-1.9321	-0.0014788	0.37	0.00028319	-1.5621	-0.0011956	765.719202569773	50.133	0.41317	50.133	49.981	50.394	3.8147E-06					34	12	4	0	0	0	0.02602	1	6830	62.617
EAIDSYIK	8	Unmodified	_EAIDSYIK_					0	0	0	0	P49951;F1MPU0	P49951	P49951	MULTI-MSMS	20140904-PurClathDigest-1ug-02	2	469.74	2	469.745108	937.475663	30344.42	-5.7834	-0.0027167	0.21215	9.9657E-05	-5.5713	-0.0026171	469.745293481866	40.737	1.5863	40.737	40.409	41.995	0					184	48	5	0	0	0	0.020126	1	4695	91.318
EAIDSYIK	8	Unmodified	_EAIDSYIK_					0	0	0	0	P49951;F1MPU0	P49951	P49951	MULTI-MSMS	20140904-PurClathDigest-1ug-03	3	469.74	2	469.745108	937.475663	30193.17	-5.8754	-0.00276	0.26097	0.00012259	-5.6145	-0.0026374	469.745344323838	40.723	1.6047	40.723	40.431	42.036	3.8147E-06					166	48	5	0	0	0	0.045172	1	4464	79.474
EAINQGMDEELERDEK	16	Oxidation (M)	_EAINQGM(ox)DEELERDEK_		EAINQGM(1)DEELERDEK		EAINQGM(101.42)DEELERDEK	0	0	1	1	P11966	P11966	P11966	MULTI-MSMS	20140904-PurClathDigest-1ug-02	2	641.62	3	641.28631	1920.8371	26467	-6.7224	-0.004311	0.18073	0.0001159	-6.5417	-0.0041951	641.620886556861	35.587	0.32483	35.587	35.429	35.754	0					33	9	5	0	0	0	0.0019591	1	3527	101.42
EANELQQWINEK	12	Unmodified	_EANELQQWINEK_					0	0	0	0	E1BFB0	E1BFB0	E1BFB0	MULTI-MSMS	20140904-PurClathDigest-1ug-02	2	751.36	2	751.367712	1500.72087	24272.41	-3.8678	-0.0029061	0.44007	0.00033065	-3.4277	-0.0025755	751.367802991365	47.751	0.2975	47.751	47.604	47.901	0					25	8	4	0	0	0	6.8983E-07	1	6526	165.58
EANELQQWINEK	12	Unmodified	_EANELQQWINEK_					0	0	0	0	E1BFB0	E1BFB0	E1BFB0	MULTI-MSMS	20140904-PurClathDigest-1ug-03	3	751.37	2	751.367712	1500.72087	24273.15	-4.3201	-0.003246	0.8616	0.00064738	-3.4585	-0.0025986	751.367754128946	47.624	0.40983	47.624	47.452	47.861	0					33	11	4	0	0	0	3.3257E-06	1	6235	141.13
EASPPISGDK	10	Unmodified	_EASPPISGDK_					0	0	0	0	F1MEW3	F1MEW3	F1MEW3	MULTI-MSMS	20140904-PurClathDigest-1ug-01	1	500.75	2	500.750921	999.48729	29560.41	-6.7188	-0.0033645	0.8135	0.00040736	-5.9053	-0.0029571	500.751270116795	32.463	0.514	32.463	32.215	32.729	-3.8147E-06					40	16	4	0	0	0	0.0062974	1	3115	105.4
EASPPISGDK	10	Unmodified	_EASPPISGDK_					0	0	0	0	F1MEW3	F1MEW3	F1MEW3	MULTI-MSMS	20140904-PurClathDigest-1ug-02	2	500.75	2	500.750921	999.48729	29769.05	-6.5306	-0.0032702	1.0165	0.00050904	-5.514	-0.0027611	500.751405136321	32.629	1.0884	32.629	32.325	33.414	0					59	30	5	0	0	0	0.01265	1	2834	93.096
EASPPISGDK	10	Unmodified	_EASPPISGDK_					0	0	0	0	F1MEW3	F1MEW3	F1MEW3	MULTI-MSMS	20140904-PurClathDigest-1ug-03	3	500.75	2	500.750921	999.48729	29766.03	-6.6026	-0.0033062	1.1066	0.00055411	-5.496	-0.0027521	500.75147100167	32.689	1.0927	32.689	32.362	33.455	0					67	29	6	0	0	0	0.0045551	1	2688	110.39
EAYYSEEKDVR	11	Unmodified	_EAYYSEEKDVR_					0	0	0	1	F1N1S2	F1N1S2	F1N1S2	MULTI-MSMS	20140904-PurClathDigest-1ug-02	2	694.81	2	694.820064	1387.62557	25533.3	-6.4868	-0.0045072	-1.125	-0.00078169	-7.6118	-0.0052888	694.819330430712	34.614	0.25742	34.614	34.493	34.751	0					14	7	3	0	0	0	1.3253E-06	1	3301	180.97
EDAANNYAR	9	Unmodified	_EDAANNYAR_					0	0	0	0	Q2HJ86;F2Z4C1;F6RP72;F2Z4K0;Q32KN8;Q3ZCJ7;F1MNF8;G5E6J5	Q2HJ86	Q2HJ86	MULTI-MSMS	20140904-PurClathDigest-1ug-02	2	512.22	2	512.228145	1022.44174	29628.79	-7.4082	-0.0037947	0.66928	0.00034282	-6.7389	-0.0034519	512.228248574098	32.011	0.28892	32.011	31.867	32.156	0					16	7	3	0	0	0	0.00033709	1	2703	147.19
EDAANNYAR	9	Unmodified	_EDAANNYAR_					0	0	0	0	Q2HJ86;F2Z4C1;F6RP72;F2Z4K0;Q32KN8;Q3ZCJ7;F1MNF8;G5E6J5	Q2HJ86	Q2HJ86	MULTI-MSMS	20140904-PurClathDigest-1ug-03	3	512.22	2	512.228145	1022.44174	29950	-7.5013	-0.0038424	0.22848	0.00011703	-7.2728	-0.0037253	512.227998023801	32.073	0.31642	32.073	31.907	32.223	0					16	7	3	0	0	0	0.00016926	1	2554	161.02
EEIAEYR	7	Unmodified	_EEIAEYR_					0	0	0	0	F1MDZ2;O77788	F1MDZ2	F1MDZ2	MULTI-MSMS	20140904-PurClathDigest-1ug-02	2	455.22	2	455.219257	908.423961	31254.77	-6.0166	-0.0027389	-0.44006	-0.00020032	-6.4567	-0.0029392	455.218905790224	36.005	0.52575	36.005	35.822	36.348	0					26	15	2	0	0	0	0.0049378	1	3628	134.66
EEIAEYR	7	Unmodified	_EEIAEYR_					0	0	0	0	F1MDZ2;O77788	F1MDZ2	F1MDZ2	MULTI-MSMS	20140904-PurClathDigest-1ug-03	3	455.22	2	455.219257	908.423961	31216.14	-6.6893	-0.0030451	-0.48407	-0.00022036	-7.1733	-0.0032654	455.219053624827	35.911	0.35192	35.911	35.742	36.094	0					17	9	2	0	0	0	0.0061123	1	3422	124.34
EEIAEYRR	8	Unmodified	_EEIAEYRR_					0	0	0	1	F1MDZ2;O77788	F1MDZ2	F1MDZ2	MULTI-MSMS	20140904-PurClathDigest-1ug-01	1	533.27	2	533.269813	1064.52507	27324.29	-6.1902	-0.0033011	0.67393	0.00035939	-5.5163	-0.0029417	533.270124469538	33.338	0.331	33.338	33.21	33.541	0					28	10	4	0	0	0	0.0055748	1	3333	143.28
EEIAEYRR	8	Unmodified	_EEIAEYRR_					0	0	0	1	F1MDZ2;O77788	F1MDZ2	F1MDZ2	MULTI-MSMS	20140904-PurClathDigest-1ug-02	2	533.27	2	533.269813	1064.52507	27562.91	-5.4915	-0.0029285	0.54226	0.00028917	-4.9493	-0.0026393	533.270198040269	33.611	0.384	33.611	33.375	33.759	0					29	10	4	0	0	0	0.004227	1	3060	167.23
EEIAEYRR	8	Unmodified	_EEIAEYRR_					0	0	0	1	F1MDZ2;O77788	F1MDZ2	F1MDZ2	MULTI-MSMS	20140904-PurClathDigest-1ug-03	3	533.27	2	533.269813	1064.52507	27864.72	-5.8	-0.0030929	0.64355	0.00034318	-5.1564	-0.0027498	533.270177923767	33.69	0.48275	33.69	33.535	34.018	0					32	13	4	0	0	0	0.0054986	1	2915	146.81
EEIHEYR	7	Unmodified	_EEIHEYR_					0	0	0	0	Q08DH7	Q08DH7	Q08DH7	MULTI-MSMS	20140904-PurClathDigest-1ug-01	1	488.23	2	488.230156	974.445759	30574.68	-6.5627	-0.0032041	-0.014188	-6.9269E-06	-6.5769	-0.003211	488.230155489878	32.212	0.42725	32.212	32.001	32.429	0					33	13	4	0	0	0	1.4268E-06	1	3034	227.47
EEIHEYR	7	Unmodified	_EEIHEYR_					0	0	0	0	Q08DH7	Q08DH7	Q08DH7	MULTI-MSMS	20140904-PurClathDigest-1ug-02	2	488.23	2	488.230156	974.445759	29898.57	-6.63	-0.003237	0.54564	0.0002664	-6.0843	-0.0029706	488.230363366844	32.296	0.52042	32.296	31.979	32.5	0					33	14	4	0	0	0	0.00081996	1	2757	183.89
EEIHEYR	7	Unmodified	_EEIHEYR_					0	0	0	0	Q08DH7	Q08DH7	Q08DH7	MULTI-MSMS	20140904-PurClathDigest-1ug-03	3	488.23	2	488.230156	974.445759	29695.89	-6.9052	-0.0033713	0.52931	0.00025842	-6.3759	-0.0031129	488.230321318015	32.397	0.42575	32.397	32.223	32.649	0					19	11	2	0	0	0	4.0023E-06	1	2617	200.12
EEIHEYRR	8	Unmodified	_EEIHEYRR_					0	0	0	1	Q08DH7	Q08DH7	Q08DH7	MULTI-MSMS	20140904-PurClathDigest-1ug-01	1	377.85	3	377.856233	1130.54687	33630.91	-5.4239	-0.0020495	-0.40068	-0.0001514	-5.8246	-0.0022008	377.856112652504	31.09	0.42642	31.09	30.946	31.373	0					39	12	5	0	0	0	0.0024556	1	2746	102.51
EEIHEYRR	8	Unmodified	_EEIHEYRR_					0	0	0	1	Q08DH7	Q08DH7	Q08DH7	MULTI-MSMS	20140904-PurClathDigest-1ug-01	1	566.28	2	566.280712	1130.54687	29288.2	-6.0323	-0.0034159	0.74782	0.00042348	-5.2844	-0.0029925	566.28096804775	31.095	0.36617	31.095	30.914	31.28	-1.9073E-06					29	10	5	0	0	0	0.0033919	1	2750	172.21
EEIHEYRR	8	Unmodified	_EEIHEYRR_					0	0	0	1	Q08DH7	Q08DH7	Q08DH7	MULTI-MSMS	20140904-PurClathDigest-1ug-02	2	377.85	3	377.856233	1130.54687	33612.57	-4.3795	-0.0016548	-0.16115	-6.089E-05	-4.5406	-0.0017157	377.856232905605	31.043	0.47833	31.043	30.909	31.387	-1.9073E-06					36	12	5	0	0	0	0.0016769	1	2474	111.95
EEIHEYRR	8	Unmodified	_EEIHEYRR_					0	0	0	1	Q08DH7	Q08DH7	Q08DH7	MULTI-MSMS	20140904-PurClathDigest-1ug-02	2	566.28	2	566.280712	1130.54687	28124.01	-4.7624	-0.0026969	0.86882	0.000492	-3.8936	-0.0022049	566.28120970137	31.048	0.41208	31.048	30.909	31.321	-1.9073E-06					26	10	4	0	0	0	0.0025071	1	2478	179.17
EEIHEYRR	8	Unmodified	_EEIHEYRR_					0	0	0	1	Q08DH7	Q08DH7	Q08DH7	MULTI-MSMS	20140904-PurClathDigest-1ug-03	3	377.85	3	377.856233	1130.54687	33575.11	-3.9448	-0.0014906	-0.29051	-0.00010977	-4.2353	-0.0016003	377.856148075189	31.09	0.62983	31.09	30.842	31.471	0					41	15	5	0	0	0	0.0021506	1	2344	105.81
EEIHEYRR	8	Unmodified	_EEIHEYRR_					0	0	0	1	Q08DH7	Q08DH7	Q08DH7	MULTI-MSMS	20140904-PurClathDigest-1ug-03	3	566.28	2	566.280712	1130.54687	27980.56	-4.664	-0.0026411	-0.029131	-1.6497E-05	-4.6931	-0.0026576	566.280554788455	31.046	0.61983	31.046	30.705	31.324	1.9073E-06					36	15	4	0	0	0	0.0030221	1	2345	175.12
EEQTERLEALDANSR	15	Unmodified	_EEQTERLEALDANSR_					0	0	0	1	P04973	P04973	P04973	MULTI-MSMS	20140904-PurClathDigest-1ug-01	1	880.92	2	880.924111	1759.83367	22713.4	-5.9128	-0.0052088	0.017634	1.5534E-05	-5.8952	-0.0051932	880.924054778315	38.23	0.49191	38.23	37.995	38.487	0					53	15	6	0	0	0	1.0748E-22	1	4564	273.49
EEQTERLEALDANSR	15	Unmodified	_EEQTERLEALDANSR_					0	0	0	1	P04973	P04973	P04973	MULTI-MSMS	20140904-PurClathDigest-1ug-01	1	587.62	3	587.6185	1759.83367	27381.22	-5.6959	-0.003347	0.16669	9.7952E-05	-5.5292	-0.0032491	587.618641691206	38.234	0.52317	38.234	38.025	38.548	0					53	16	6	0	0	0	5.0728E-05	1	4566	115.8
EEQTERLEALDANSR	15	Unmodified	_EEQTERLEALDANSR_					0	0	0	1	P04973	P04973	P04973	MULTI-MSMS	20140904-PurClathDigest-1ug-02	2	880.92	2	880.924111	1759.83367	22498.51	-5.7778	-0.0050898	-1.0377	-0.00091417	-6.8156	-0.006004	880.923425938574	38.428	0.91225	38.428	38.215	39.127	0					74	26	6	0	0	0	1.3487E-22	1	4171	255.16
EEQTERLEALDANSR	15	Unmodified	_EEQTERLEALDANSR_					0	0	0	1	P04973	P04973	P04973	MULTI-MSMS	20140904-PurClathDigest-1ug-02	2	587.95	3	587.6185	1759.83367	27524.96	-5.845	-0.0034347	-0.57425	-0.00033744	-6.4193	-0.0037721	587.618365257344	38.425	0.61467	38.425	38.215	38.83	0					54	17	5	0	0	0	8.4914E-09	1	4173	166.9
EEQTERLEALDANSR	15	Unmodified	_EEQTERLEALDANSR_					0	0	0	1	P04973	P04973	P04973	MULTI-MSMS	20140904-PurClathDigest-1ug-03	3	880.92	2	880.924111	1759.83367	22576.17	-5.8762	-0.0051764	-0.42767	-0.00037675	-6.3038	-0.0055532	880.92376547281	38.583	0.97625	38.583	38.336	39.313	0					72	27	5	0	0	0	2.0054E-49	1	3993	324.6
EEQTERLEALDANSR	15	Unmodified	_EEQTERLEALDANSR_					0	0	0	1	P04973	P04973	P04973	MULTI-MSMS	20140904-PurClathDigest-1ug-03	3	587.95	3	587.6185	1759.83367	27263.38	-5.2691	-0.0030962	-1.0583	-0.00062189	-6.3275	-0.0037181	587.617986359217	38.59	0.63992	38.59	38.369	39.009	0					58	17	5	0	0	0	7.3357E-06	1	3997	145.69
EETPGTEWEK	10	Unmodified	_EETPGTEWEK_					0	0	0	0	P04975;G3N252	P04975	P04975	MULTI-MSMS	20140904-PurClathDigest-1ug-01	1	603.27	2	603.269675	1204.5248	26968.18	-6.2116	-0.0037472	-0.26197	-0.00015804	-6.4735	-0.0039053	603.269559086858	37.888	1.1098	37.888	37.587	38.696	0					93	35	6	0	0	0	0.00026566	1	4457	125.75
EETPGTEWEK	10	Unmodified	_EETPGTEWEK_					0	0	0	0	P04975;G3N252	P04975	P04975	MULTI-MSMS	20140904-PurClathDigest-1ug-02	2	603.27	2	603.269675	1204.5248	26966.9	-5.8428	-0.0035248	-0.48334	-0.00029158	-6.3261	-0.0038164	603.269424057325	38.093	1.3152	38.093	37.878	39.193	0					102	38	3	0	0	0	0.00033548	1	4082	125.75
EETPGTEWEK	10	Unmodified	_EETPGTEWEK_					0	0	0	0	P04975;G3N252	P04975	P04975	MULTI-MSMS	20140904-PurClathDigest-1ug-03	3	603.27	2	603.269675	1204.5248	26971.12	-6.289	-0.003794	-0.46758	-0.00028208	-6.7566	-0.004076	603.269466884054	38.182	1.3642	38.182	37.916	39.28	0					102	37	6	0	0	0	0.00026566	2	3952	133.23
EGEVGVPDHSPR	12	Unmodified	_EGEVGVPDHSPR_					0	0	0	0	G3MYP5	G3MYP5	G3MYP5	MULTI-MSMS	20140904-PurClathDigest-1ug-01	1	639.8	2	639.807291	1277.60003	26523.63	-5.9767	-0.0038239	-0.52945	-0.00033874	-6.5061	-0.0041627	639.806871379117	33.367	0.42608	33.367	33.115	33.541	0					37	13	4	0	0	0	2.1878E-06	1	3357	158.04
EGLEETLR	8	Unmodified	_EGLEETLR_					0	0	0	0	P02548	P02548	P02548	MULTI-MSMS	20140904-PurClathDigest-1ug-01	1	473.74	2	473.745639	945.476725	30050.85	-5.6188	-0.0026619	-0.9885	-0.0004683	-6.6073	-0.0031302	473.745182833901	39.064	1.283	39.064	38.813	40.096	0					100	41	5	0	0	0	0.000188	2	4768	190.52
EGLEETLR	8	Unmodified	_EGLEETLR_					0	0	0	0	P02548	P02548	P02548	MULTI-MSMS	20140904-PurClathDigest-1ug-02	2	473.74	2	473.745639	945.476725	30378.68	-4.809	-0.0022783	-1.7776	-0.00084211	-6.5866	-0.0031204	473.744797471992	39.448	0.99067	39.448	39.255	40.246	0					82	29	4	0	0	0	0.00087823	1	4410	155.88
EGLEETLR	8	Unmodified	_EGLEETLR_					0	0	0	0	P02548	P02548	P02548	MULTI-MSMS	20140904-PurClathDigest-1ug-03	3	473.74	2	473.745639	945.476725	30194.25	-5.1413	-0.0024357	-1.3669	-0.00064756	-6.5082	-0.0030832	473.745007377664	39.561	1.1231	39.561	39.374	40.498	0					75	32	5	0	0	0	0.00087823	1	4217	155.88
EGMQLISEKPETEAVVK	17	Oxidation (M)	_EGM(ox)QLISEKPETEAVVK_		EGM(1)QLISEKPETEAVVK		EGM(91.32)QLISEKPETEAVVK	0	0	1	1	F1MYC9	F1MYC9	F1MYC9	MULTI-MSMS	20140904-PurClathDigest-1ug-01	1	952.48	2	952.487698	1902.96084	21478.13	-5.3409	-0.0050872	-0.061698	-5.8767E-05	-5.4026	-0.0051459	952.988978014192	38.344	0.33925	38.344	38.148	38.487	0					41	10	6	0	0	0	0.006686	1	4613	91.317
EGMQLISEKPETEAVVK	17	Oxidation (M)	_EGM(ox)QLISEKPETEAVVK_		EGM(1)QLISEKPETEAVVK		EGM(84.65)QLISEKPETEAVVK	0	0	1	1	F1MYC9	F1MYC9	F1MYC9	MULTI-MSMS	20140904-PurClathDigest-1ug-02	2	952.99	2	952.487698	1902.96084	21680.99	-5.3608	-0.0051061	-0.73547	-0.00070052	-6.0963	-0.0058066	952.487230578229	38.562	0.30808	38.562	38.409	38.717	0					33	8	5	0	0	0	0.0060025	1	4224	84.653
EGQFKDIITK	10	Unmodified	_EGQFKDIITK_					0	0	0	1	P49951;F1MPU0	P49951	P49951	MULTI-MSMS	20140904-PurClathDigest-1ug-01	1	589.82	2	589.824421	1177.63429	27577.46	-5.4192	-0.0031964	-0.089173	-5.2596E-05	-5.5084	-0.003249	589.824440648277	38.726	0.42442	38.726	38.578	39.002	0					37	13	4	0	0	0	0.00010455	1	4704	158.42
EGQFKDIITK	10	Unmodified	_EGQFKDIITK_					0	0	0	1	P49951;F1MPU0	P49951	P49951	MULTI-MSMS	20140904-PurClathDigest-1ug-01	1	393.55	3	393.552039	1177.63429	33472.47	-5.5677	-0.0021912	0.48045	0.00018908	-5.0872	-0.0020021	393.552275205241	38.722	0.29683	38.722	38.578	38.875	0					34	9	5	0	0	0	0.061777	1	4707	42.802
EGQFKDIITK	10	Unmodified	_EGQFKDIITK_					0	0	0	1	P49951;F1MPU0	P49951	P49951	MULTI-MSMS	20140904-PurClathDigest-1ug-02	2	589.82	2	589.824421	1177.63429	27594.64	-4.43	-0.0026129	-0.21969	-0.00012958	-4.6497	-0.0027425	589.824363391657	39.134	0.63583	39.134	38.754	39.39	0					46	18	4	0	0	0	3.9283E-05	1	4340	184.55
EGQFKDIITK	10	Unmodified	_EGQFKDIITK_					0	0	0	1	P49951;F1MPU0	P49951	P49951	MULTI-MSMS	20140904-PurClathDigest-1ug-03	3	589.82	2	589.824421	1177.63429	27557.38	-4.3933	-0.0025913	-0.16489	-9.7254E-05	-4.5582	-0.0026885	589.824391128705	39.276	0.91724	39.276	39.042	39.959	0					53	26	5	0	0	0	3.9283E-05	1	4153	184.55
EGSSEKEEGEQEEEGETEAEGEGEEAAAEAK	31	Unmodified	_EGSSEKEEGEQEEEGETEAEGEGEEAAAEAK_					0	0	0	1	F1MDZ2;O77788	F1MDZ2	F1MDZ2	MULTI-MSMS	20140904-PurClathDigest-1ug-02	2	1085.77	3	1085.44147	3253.30259	20171.06	-5.119	-0.0055564	0.22752	0.00024695	-4.8915	-0.0053094	1085.77600718804	39.117	0.35992	39.117	38.928	39.288	0					54	10	8	0	0	0	0.0065321	1	4355	87.155
EGSSEKEEGEQEEEGETEAEGEGEEAAAEAK	31	Unmodified	_EGSSEKEEGEQEEEGETEAEGEGEEAAAEAK_					0	0	0	1	F1MDZ2;O77788	F1MDZ2	F1MDZ2	MULTI-MSMS	20140904-PurClathDigest-1ug-03	3	1086.1	3	1085.44147	3253.30259	20364.29	-5.4592	-0.0059256	0.10045	0.00010903	-5.3588	-0.0058166	1085.7757317145	39.282	0.32792	39.282	39.11	39.438	-3.8147E-06					46	9	7	0	0	0	0.041331	1	4166	57.144
EGSSEKEEGEQEEEGETEAEGEGEEAAAEAKEEK	34	Unmodified	_EGSSEKEEGEQEEEGETEAEGEGEEAAAEAKEEK_					0	0	0	2	F1MDZ2;O77788	F1MDZ2	F1MDZ2	MULTI-MSMS	20140904-PurClathDigest-1ug-01	1	911.12	4	910.877961	3639.48274	21907.54	-4.2936	-0.0039109	-0.4896	-0.00044597	-4.7832	-0.0043569	911.128185004441	39.276	0.36666	39.276	39.093	39.46	0					53	11	6	0	0	0	0.055857	1	4869	43.795
EGSSEKEEGEQEEEGETEAEGEGEEAAAEAKEEK	34	Unmodified	_EGSSEKEEGEQEEEGETEAEGEGEEAAAEAKEEK_					0	0	0	2	F1MDZ2;O77788	F1MDZ2	F1MDZ2	MULTI-MSMS	20140904-PurClathDigest-1ug-03	3	911.38	4	910.877961	3639.48274	21845.13	-4.3141	-0.0039297	-0.29847	-0.00027187	-4.6126	-0.0042015	911.128674448576	39.819	0.41508	39.819	39.648	40.063	0					50	11	7	0	0	0	0.0054674	1	4294	97.387
EHLELFWSR	9	Unmodified	_EHLELFWSR_					0	0	0	0	P49951;F1MPU0	P49951	P49951	MULTI-MSMS	20140904-PurClathDigest-1ug-01	1	608.81	2	608.809105	1215.60366	27263.3	-4.0526	-0.0024673	-0.56131	-0.00034173	-4.6139	-0.002809	608.808978688007	46.762	2.8505	46.762	46.517	49.367	0					262	93	6	0	0	0	4.3577E-07	4	6800	218.58
EHLELFWSR	9	Unmodified	_EHLELFWSR_					0	0	0	0	P49951;F1MPU0	P49951	P49951	MULTI-MSMS	20140904-PurClathDigest-1ug-01	1	406.21	3	406.208495	1215.60366	33779.09	-4.0288	-0.0016365	-0.59637	-0.00024225	-4.6251	-0.0018788	406.208313929783	46.712	1.1261	46.712	46.517	47.643	0					104	36	6	0	0	0	0.00037457	2	6801	115.71
EHLELFWSR	9	Unmodified	_EHLELFWSR_					0	0	0	0	P49951;F1MPU0	P49951	P49951	MULTI-MSMS	20140904-PurClathDigest-1ug-02	2	608.81	2	608.809105	1215.60366	27131.3	-4.48	-0.0027275	-0.076716	-4.6706E-05	-4.5567	-0.0027742	608.809234124267	47.233	3.1372	47.233	47.035	50.172	-3.8147E-06					191	95	5	0	0	0	6.2153E-07	4	6484	214.83
EHLELFWSR	9	Unmodified	_EHLELFWSR_					0	0	0	0	P49951;F1MPU0	P49951	P49951	MULTI-MSMS	20140904-PurClathDigest-1ug-02	2	406.21	3	406.208495	1215.60366	33464.25	-4.3752	-0.0017772	0.052941	2.1505E-05	-4.3222	-0.0017557	406.208553919855	47.198	0.8285	47.198	46.973	47.802	0					84	25	5	0	0	0	0.00013698	2	6359	155.07
EHLELFWSR	9	Unmodified	_EHLELFWSR_					0	0	0	0	P49951;F1MPU0	P49951	P49951	MULTI-MSMS	20140904-PurClathDigest-1ug-03	3	608.81	2	608.809105	1215.60366	27146.44	-4.4033	-0.0026808	-0.08321	-5.0659E-05	-4.4865	-0.0027314	608.809237888665	47.127	1.4803	47.127	46.903	48.383	0					151	44	6	0	0	0	2.1239E-07	5	6332	223.08
EHLELFWSR	9	Unmodified	_EHLELFWSR_					0	0	0	0	P49951;F1MPU0	P49951	P49951	MULTI-MSMS	20140904-PurClathDigest-1ug-03	3	406.21	3	406.208495	1215.60366	33591.71	-4.154	-0.0016874	-0.19931	-8.0962E-05	-4.3533	-0.0017683	406.208455432975	47.106	1.1914	47.106	46.903	48.094	-3.8147E-06					90	35	5	0	0	0	0.00019415	2	6137	118.33
EIEAEIQALR	10	Unmodified	_EIEAEIQALR_					0	0	0	0	F1MDZ2;O77788	F1MDZ2	F1MDZ2	MULTI-MSMS	20140904-PurClathDigest-1ug-01	1	586.32	2	586.319502	1170.62445	27444.49	-4.232	-0.0024813	0.087119	5.1079E-05	-4.1449	-0.0024302	586.319618659289	44.033	0.9275	44.033	43.789	44.716	0					74	30	5	0	0	0	2.7848E-05	2	6089	172.98
EIEAEIQALR	10	Unmodified	_EIEAEIQALR_					0	0	0	0	F1MDZ2;O77788	F1MDZ2	F1MDZ2	MULTI-MSMS	20140904-PurClathDigest-1ug-02	2	586.32	2	586.319502	1170.62445	27543.22	-4.1573	-0.0024375	0.43956	0.00025772	-3.7177	-0.0021798	586.319868259015	44.403	0.85958	44.403	44.118	44.977	0					73	26	5	0	0	0	0.00021532	2	5634	140.16
EIEAEIQALR	10	Unmodified	_EIEAEIQALR_					0	0	0	0	F1MDZ2;O77788	F1MDZ2	F1MDZ2	MULTI-MSMS	20140904-PurClathDigest-1ug-03	3	586.32	2	586.319502	1170.62445	27503.12	-4.3128	-0.0025287	0.19599	0.00011491	-4.1168	-0.0024138	586.319684343016	44.479	1.1197	44.479	44.198	45.318	3.8147E-06					89	34	5	0	0	0	4.7927E-05	2	5403	174.41
EIETYHNLLEGGQEDFESSGAGK	23	Unmodified	_EIETYHNLLEGGQEDFESSGAGK_					0	0	0	0	CON__P35527	CON__P35527	CON__P35527	MULTI-MSMS	20140904-PurClathDigest-1ug-01	1	837.71	3	837.382107	2509.12449	22781.88	-4.1479	-0.0034734	-0.31023	-0.00025978	-4.4581	-0.0037332	837.716173430983	44.94	0.447	44.94	44.716	45.163	0					52	14	6	0	0	0	0.057163	1	6350	30.869
EIETYHNLLEGGQEDFESSGAGK	23	Unmodified	_EIETYHNLLEGGQEDFESSGAGK_					0	0	0	0	CON__P35527	CON__P35527	CON__P35527	MULTI-MSMS	20140904-PurClathDigest-1ug-01	1	1256.07	2	1255.56952	2509.12449	18594.33	-5.6577	-0.0071037	1.3051	0.0016387	-4.3526	-0.005465	1256.07235924604	44.932	0.38659	44.932	44.747	45.134	0					47	12	6	0	0	0	0.012355	1	6353	57.484
EIETYHNLLEGGQEDFESSGAGK	23	Unmodified	_EIETYHNLLEGGQEDFESSGAGK_					0	0	0	0	CON__P35527	CON__P35527	CON__P35527	MULTI-MSMS	20140904-PurClathDigest-1ug-02	2	1256.07	2	1255.56952	2509.12449	18722.68	-4.4748	-0.0056184	1.4352	0.001802	-3.0395	-0.0038163	1256.07260025173	45.444	0.44033	45.444	45.237	45.677	0					55	13	6	0	0	0	0.0050968	1	5922	64.589
EIETYHNLLEGGQEDFESSGAGK	23	Unmodified	_EIETYHNLLEGGQEDFESSGAGK_					0	0	0	0	CON__P35527	CON__P35527	CON__P35527	MULTI-MSMS	20140904-PurClathDigest-1ug-03	3	837.71	3	837.382107	2509.12449	22906.38	-4.1123	-0.0034435	-0.346	-0.00028974	-4.4583	-0.0037333	837.71625039022	45.418	0.4415	45.418	45.252	45.694	0					54	13	6	0	0	0	0.0022766	1	5661	43.841
EIETYHNLLEGGQEDFESSGAGK	23	Unmodified	_EIETYHNLLEGGQEDFESSGAGK_					0	0	0	0	CON__P35527	CON__P35527	CON__P35527	MULTI-MSMS	20140904-PurClathDigest-1ug-03	3	1256.07	2	1255.56952	2509.12449	18795.22	-4.4965	-0.0056457	0.45199	0.0005675	-4.0445	-0.0050782	1256.07129819522	45.415	0.37692	45.415	45.252	45.629	0					46	11	6	0	0	0	3.4356E-05	1	5668	90.308
EITALAPSTMK	11	Oxidation (M)	_EITALAPSTM(ox)K_		EITALAPSTM(1)K		EITALAPSTM(89.8)K	0	0	1	0	P63258;P60712	P63258	P63258	MULTI-MSMS	20140904-PurClathDigest-1ug-01	1	589.31	2	589.310289	1176.60602	27282.45	-5.601	-0.0033007	0.59365	0.00034985	-5.0074	-0.0029509	589.31081748736	37.607	0.59034	37.607	37.405	37.995	0					52	18	5	0	0	0	0.059663	1	4414	89.805
EKDVLEDIPKWEGK	14	Unmodified	_EKDVLEDIPKWEGK_					0	0	0	2	F1MEW3	F1MEW3	F1MEW3	MULTI-MSMS	20140904-PurClathDigest-1ug-01	1	562.96	3	562.629677	1684.8672	28585.22	-4.8468	-0.002727	0.64807	0.00036463	-4.1988	-0.0023623	562.964382788836	43.888	0.41433	43.888	43.61	44.024	0					40	13	4	0	0	0	0.014148	1	6083	82.651
EKEPETESKPGEDLK	15	Unmodified	_EKEPETESKPGEDLK_					0	0	0	2	F1MEW3	F1MEW3	F1MEW3	MULTI-MSMS	20140904-PurClathDigest-1ug-01	1	572.95	3	572.615985	1714.82612	27935.51	-7.0394	-0.0040309	-0.27146	-0.00015544	-7.3108	-0.0041863	572.615884446192	31.551	0.71975	31.551	31.342	32.062	1.9073E-06					93	22	6	0	0	0	0.00042371	2	2843	127.94
EKEPETESKPGEDLK	15	Unmodified	_EKEPETESKPGEDLK_					0	0	0	2	F1MEW3	F1MEW3	F1MEW3	MULTI-MSMS	20140904-PurClathDigest-1ug-01	1	858.41	2	858.420339	1714.82612	22922.44	-6.3765	-0.0054737	-0.16135	-0.0001385	-6.5378	-0.0056122	858.420328860438	31.552	0.68967	31.552	31.342	32.032	0					86	21	6	0	0	0	0.0016607	2	2848	138.81
EKEPETESKPGEDLK	15	Unmodified	_EKEPETESKPGEDLK_					0	0	0	2	F1MEW3	F1MEW3	F1MEW3	MULTI-MSMS	20140904-PurClathDigest-1ug-02	2	572.61	3	572.615985	1714.82612	27802.65	-6.8213	-0.003906	-0.46275	-0.00026498	-7.284	-0.004171	572.615818183931	31.558	0.76783	31.558	31.321	32.089	1.9073E-06					86	21	6	0	0	0	0.00019571	2	2570	132.15
EKEPETESKPGEDLK	15	Unmodified	_EKEPETESKPGEDLK_					0	0	0	2	F1MEW3	F1MEW3	F1MEW3	MULTI-MSMS	20140904-PurClathDigest-1ug-02	2	858.42	2	858.420339	1714.82612	23043.04	-6.973	-0.0059858	0.32966	0.00028299	-6.6434	-0.0057028	858.420769051552	31.56	0.65992	31.56	31.355	32.015	0					73	18	6	0	0	0	7.7805E-12	2	2575	231.21
EKEPETESKPGEDLK	15	Unmodified	_EKEPETESKPGEDLK_					0	0	0	2	F1MEW3	F1MEW3	F1MEW3	MULTI-MSMS	20140904-PurClathDigest-1ug-03	3	572.61	3	572.615985	1714.82612	27868.64	-6.3233	-0.0036208	-0.78942	-0.00045204	-7.1127	-0.0040728	572.615652747363	31.611	0.89167	31.611	31.366	32.257	0					86	23	7	0	0	0	0.0021431	2	2432	107.73
EKEPETESKPGEDLK	15	Unmodified	_EKEPETESKPGEDLK_					0	0	0	2	F1MEW3	F1MEW3	F1MEW3	MULTI-MSMS	20140904-PurClathDigest-1ug-03	3	858.42	2	858.420339	1714.82612	22825.93	-6.2968	-0.0054053	-0.11813	-0.00010141	-6.415	-0.0055067	858.420354306107	31.609	0.70908	31.609	31.401	32.11	1.9073E-06					75	18	6	0	0	0	1.1415E-09	1	2437	199.33
EKEPIAASTNR	11	Unmodified	_EKEPIAASTNR_					0	0	0	1	E1BFB0	E1BFB0	E1BFB0	MULTI-MSMS	20140904-PurClathDigest-1ug-01	1	608.32	2	608.320034	1214.62551	27458.05	-5.9114	-0.0035961	1.1587	0.00070489	-4.7527	-0.0028912	608.320976334237	31.292	0.35875	31.292	31.075	31.434	0					32	10	4	0	0	0	0.0012138	1	2803	131.12
EKEPIAASTNR	11	Unmodified	_EKEPIAASTNR_					0	0	0	1	E1BFB0	E1BFB0	E1BFB0	MULTI-MSMS	20140904-PurClathDigest-1ug-02	2	608.32	2	608.320034	1214.62551	27356.18	-4.6018	-0.0027994	0.57776	0.00035147	-4.024	-0.0024479	608.320470075054	31.295	0.40333	31.295	31.084	31.487	0					30	10	4	0	0	0	0.00079059	1	2532	134.3
EKEPIAASTNR	11	Unmodified	_EKEPIAASTNR_					0	0	0	1	E1BFB0	E1BFB0	E1BFB0	MULTI-MSMS	20140904-PurClathDigest-1ug-03	3	608.32	2	608.320034	1214.62551	27838.53	-4.9775	-0.0030279	1.1061	0.00067288	-3.8714	-0.0023551	608.320780040645	31.349	0.39908	31.349	31.107	31.506	0					28	9	4	0	0	0	0.003568	1	2396	113.38
EKEPIVGSTDYGKDEDSAEALLK	23	Unmodified	_EKEPIVGSTDYGKDEDSAEALLK_					0	0	0	2	E1BFB0	E1BFB0	E1BFB0	MULTI-MSMS	20140904-PurClathDigest-1ug-01	1	832.41	3	832.078024	2493.21224	23368.96	-5.4548	-0.0045388	-0.04947	-4.1163E-05	-5.5043	-0.00458	832.412396582259	42.812	0.35675	42.812	42.6	42.957	0					37	11	4	0	0	0	0.00063655	1	5781	104.67
EKEPIVGSTDYGKDEDSAEALLK	23	Unmodified	_EKEPIVGSTDYGKDEDSAEALLK_					0	0	0	2	E1BFB0	E1BFB0	E1BFB0	MULTI-MSMS	20140904-PurClathDigest-1ug-02	2	832.41	3	832.078024	2493.21224	23018.87	-5.758	-0.0047911	0.70473	0.00058639	-5.0533	-0.0042047	832.412745140156	43.039	0.38058	43.039	42.817	43.198	-3.8147E-06					46	11	6	0	0	0	0.0013358	1	5326	98.3
EKEPIVGSTDYGKDEDSAEALLK	23	Unmodified	_EKEPIVGSTDYGKDEDSAEALLK_					0	0	0	2	E1BFB0	E1BFB0	E1BFB0	MULTI-MSMS	20140904-PurClathDigest-1ug-03	3	832.41	3	832.078024	2493.21224	23164.63	-6.2365	-0.0051893	1.3435	0.0011179	-4.893	-0.0040714	832.413305696286	43.167	0.45375	43.167	42.897	43.35	0					45	13	6	0	0	0	0.0078793	1	5105	90.475
EKGPEPTDEVLQQQGK	16	Unmodified	_EKGPEPTDEVLQQQGK_					0	0	0	1	F1N3M8;G3MYP5	F1N3M8;G3MYP5	G3MYP5	MULTI-MSMS	20140904-PurClathDigest-1ug-01	1	891.94	2	891.947055	1781.87956	22643.03	-5.0044	-0.0044637	-0.32628	-0.00029103	-5.3307	-0.0047547	891.947075246788	36.225	0.49808	36.225	35.995	36.493	-3.8147E-06					91	15	9	0	0	0	2.865E-06	2	4043	151.04
EKGPEPTDEVLQQQGK	16	Unmodified	_EKGPEPTDEVLQQQGK_					0	0	0	1	F1N3M8;G3MYP5	F1N3M8;G3MYP5	G3MYP5	MULTI-MSMS	20140904-PurClathDigest-1ug-01	1	594.96	3	594.967129	1781.87956	27473.61	-5.2296	-0.0031115	0.64617	0.00038445	-4.5835	-0.002727	594.967622578615	36.226	0.6605	36.226	35.963	36.623	0					63	20	4	0	0	0	0.00022376	1	4051	112.24
EKGPEPTDEVLQQQGK	16	Unmodified	_EKGPEPTDEVLQQQGK_					0	0	0	1	F1N3M8;G3MYP5	F1N3M8;G3MYP5	G3MYP5	MULTI-MSMS	20140904-PurClathDigest-1ug-02	2	891.94	2	891.947055	1781.87956	22380.07	-4.0448	-0.0036077	-1.0233	-0.00091268	-5.068	-0.0045204	891.946494501238	36.375	0.57908	36.375	36.119	36.699	0					88	16	9	0	0	0	2.0153E-08	1	3694	170.09
EKGPEPTDEVLQQQGK	16	Unmodified	_EKGPEPTDEVLQQQGK_					0	0	0	1	F1N3M8;G3MYP5	F1N3M8;G3MYP5	G3MYP5	MULTI-MSMS	20140904-PurClathDigest-1ug-02	2	595.3	3	594.967129	1781.87956	27561.97	-4.8503	-0.0028858	0.43151	0.00025673	-4.4188	-0.0026291	594.967505096453	36.376	0.54558	36.376	36.119	36.665	0					55	15	4	0	0	0	0.00014372	1	3695	117.48
EKGPEPTDEVLQQQGK	16	Unmodified	_EKGPEPTDEVLQQQGK_					0	0	0	1	F1N3M8;G3MYP5	F1N3M8;G3MYP5	G3MYP5	MULTI-MSMS	20140904-PurClathDigest-1ug-03	3	891.94	2	891.947055	1781.87956	22631.53	-5.2561	-0.0046882	-0.12672	-0.00011303	-5.3829	-0.0048012	891.94719820588	36.371	0.49783	36.371	36.159	36.657	0					56	13	5	0	0	0	8.9473E-12	1	3516	205.98
EKGPEPTDEVLQQQGK	16	Unmodified	_EKGPEPTDEVLQQQGK_					0	0	0	1	F1N3M8;G3MYP5	F1N3M8;G3MYP5	G3MYP5	MULTI-MSMS	20140904-PurClathDigest-1ug-03	3	594.96	3	594.967129	1781.87956	27628.67	-5.3482	-0.003182	0.41891	0.00024924	-4.9293	-0.0029327	594.967493455765	36.374	0.53025	36.374	36.126	36.657	0					49	14	4	0	0	0	1.9203E-05	1	3521	127.18
EKGSGGEEEKGVVTNGLDVSPGDEK	25	Deamidation (NQ)	_EKGSGGEEEKGVVTN(de)GLDVSPGDEK_	EKGSGGEEEKGVVTN(1)GLDVSPGDEK		EKGSGGEEEKGVVTN(114.9)GLDVSPGDEK		0	1	0	2	F1MDZ2;O77788	F1MDZ2	F1MDZ2	MULTI-MSMS	20140904-PurClathDigest-1ug-03	3	840.4	3	840.064555	2517.17184	23488.81	-5.8137	-0.0048838	-0.24888	-0.00020907	-6.0625	-0.0050929	840.398524935604	38.11	0.8375	38.11	37.626	38.464	0					83	22	4	0	0	0	0.00026617	2	3883	114.9
EKLDVLDQER	10	Unmodified	_EKLDVLDQER_					0	0	0	1	E1BFB0	E1BFB0	E1BFB0	MULTI-MSMS	20140904-PurClathDigest-1ug-01	1	622.82	2	622.827692	1243.64083	26124.53	-5.3338	-0.003322	-0.93322	-0.00058123	-6.267	-0.0039033	622.827261397457	38.636	0.29667	38.636	38.487	38.784	0					28	9	4	0	0	0	4.5565E-06	1	4686	215.56
EKLDVLDQER	10	Unmodified	_EKLDVLDQER_					0	0	0	1	E1BFB0	E1BFB0	E1BFB0	MULTI-MSMS	20140904-PurClathDigest-1ug-02	2	622.82	2	622.827692	1243.64083	26381.44	-4.544	-0.0028302	-0.40403	-0.00025164	-4.9481	-0.0030818	622.827508069568	38.926	0.406	38.926	38.754	39.16	0					33	11	4	0	0	0	3.2876E-05	1	4303	186.81
EKLDVLDQER	10	Unmodified	_EKLDVLDQER_					0	0	0	1	E1BFB0	E1BFB0	E1BFB0	MULTI-MSMS	20140904-PurClathDigest-1ug-03	3	622.82	2	622.827692	1243.64083	26957.25	-4.7068	-0.0029315	-0.54036	-0.00033655	-5.2471	-0.0032681	622.827384949996	39.09	0.31258	39.09	38.935	39.247	-3.8147E-06					27	8	4	0	0	0	0.0049196	1	4126	110.08
EKVEEVGGKEEGGLK	15	Unmodified	_EKVEEVGGKEEGGLK_					0	0	0	2	F1MDZ2;O77788	F1MDZ2	F1MDZ2	MULTI-MSMS	20140904-PurClathDigest-1ug-01	1	794.41	2	794.414859	1586.81517	23950.9	-6.4165	-0.0050974	0.010758	8.5462E-06	-6.4057	-0.0050888	794.414769513803	32.473	0.77374	32.473	32.246	33.02	0					68	24	6	0	0	0	2.2773E-07	1	3097	174.62
EKVEEVGGKEEGGLK	15	Unmodified	_EKVEEVGGKEEGGLK_					0	0	0	2	F1MDZ2;O77788	F1MDZ2	F1MDZ2	MULTI-MSMS	20140904-PurClathDigest-1ug-01	1	529.94	3	529.945665	1586.81517	28795.51	-6.5912	-0.003493	0.44691	0.00023684	-6.1443	-0.0032562	529.945843706241	32.487	1.0837	32.487	32.277	33.361	0					88	34	4	0	0	0	0.00037484	1	3114	125.67
EKVEEVGGKEEGGLK	15	Unmodified	_EKVEEVGGKEEGGLK_					0	0	0	2	F1MDZ2;O77788	F1MDZ2	F1MDZ2	MULTI-MSMS	20140904-PurClathDigest-1ug-02	2	794.41	2	794.414859	1586.81517	23836.51	-6.1865	-0.0049147	0.00072402	5.7517E-07	-6.1858	-0.0049141	794.414671330625	32.639	0.83516	32.639	32.465	33.3	0					58	23	6	0	0	0	6.4218E-10	1	2828	216.99
EKVEEVGGKEEGGLK	15	Unmodified	_EKVEEVGGKEEGGLK_					0	0	0	2	F1MDZ2;O77788	F1MDZ2	F1MDZ2	MULTI-MSMS	20140904-PurClathDigest-1ug-02	2	529.94	3	529.945665	1586.81517	28759.97	-6.3206	-0.0033496	0.46863	0.00024835	-5.852	-0.0031012	529.945866323457	32.65	1.2659	32.65	32.427	33.693	0					77	35	4	0	0	0	0.00048774	1	2842	116.78
EKVEEVGGKEEGGLK	15	Unmodified	_EKVEEVGGKEEGGLK_					0	0	0	2	F1MDZ2;O77788	F1MDZ2	F1MDZ2	MULTI-MSMS	20140904-PurClathDigest-1ug-03	3	794.41	2	794.414859	1586.81517	23947.74	-6.1287	-0.0048687	-0.038732	-3.0769E-05	-6.1675	-0.0048995	794.414639024053	32.726	0.6895	32.726	32.542	33.232	0					48	18	5	0	0	0	1.8313E-07	1	2689	190.11
EKVEEVGGKEEGGLK	15	Unmodified	_EKVEEVGGKEEGGLK_					0	0	0	2	F1MDZ2;O77788	F1MDZ2	F1MDZ2	MULTI-MSMS	20140904-PurClathDigest-1ug-03	3	529.94	3	529.945665	1586.81517	28540.58	-6.4487	-0.0034174	0.66708	0.00035352	-5.7816	-0.0030639	529.945949457254	32.735	1.1684	32.735	32.542	33.711	0					83	31	4	0	0	0	1.2825E-05	1	2696	154.46
EKVGEQAQVVIIDMNDPSNPIR	22	Oxidation (M)	_EKVGEQAQVVIIDM(ox)NDPSNPIR_		EKVGEQAQVVIIDM(1)NDPSNPIR		EKVGEQAQVVIIDM(52.72)NDPSNPIR	0	0	1	1	P49951;F1MPU0	P49951	P49951	MULTI-MSMS	20140904-PurClathDigest-1ug-01	1	823.75	3	823.419839	2467.23769	23139.65	-5.4385	-0.0044782	0.36332	0.00029917	-5.0752	-0.004179	823.754473974001	42.444	2.6848	42.444	41.759	44.444	0					419	89	8	0	0	0	0.049137	1	5850	52.72
EKVGEQAQVVIIDMNDPSNPIR	22	Oxidation (M)	_EKVGEQAQVVIIDM(ox)NDPSNPIR_		EKVGEQAQVVIIDM(1)NDPSNPIR		EKVGEQAQVVIIDM(65.18)NDPSNPIR	0	0	1	1	P49951;F1MPU0	P49951	P49951	MULTI-MSMS	20140904-PurClathDigest-1ug-02	2	823.75	3	823.419839	2467.23769	23321.04	-4.6287	-0.0038114	0.20654	0.00017007	-4.4222	-0.0036413	823.754380896725	42.607	2.9196	42.607	41.896	44.815	0					346	91	9	0	0	0	0.036681	2	5138	65.184
EKVGEQAQVVIIDMNDPSNPIR	22	Oxidation (M)	_EKVGEQAQVVIIDM(ox)NDPSNPIR_		EKVGEQAQVVIIDM(1)NDPSNPIR		EKVGEQAQVVIIDM(49.66)NDPSNPIR	0	0	1	1	P49951;F1MPU0	P49951	P49951	MULTI-MSMS	20140904-PurClathDigest-1ug-02	2	823.75	3	823.419839	2467.23769	23273.1	-4.4712	-0.0036816	1.0332	0.00085076	-3.438	-0.0028309	823.754821143695	44.237	1.0883	44.237	43.696	44.784	0					64	33	2	0	0	0	0.052193	1	5588	49.662
EKVGEQAQVVIIDMNDPSNPIR	22	Oxidation (M)	_EKVGEQAQVVIIDM(ox)NDPSNPIR_		EKVGEQAQVVIIDM(1)NDPSNPIR		EKVGEQAQVVIIDM(69.78)NDPSNPIR	0	0	1	1	P49951;F1MPU0	P49951	P49951	MULTI-MSMS	20140904-PurClathDigest-1ug-02	2	823.75	3	823.419839	2467.23769	23273.09	-3.5435	-0.0029178	0.53818	0.00044315	-3.0054	-0.0024747	823.754489090174	45.528	1.7848	45.528	44.784	46.569	0					179	56	4	0	0	0	0.031723	2	5910	69.779
EKVGEQAQVVIIDMNDPSNPIR	22	Oxidation (M)	_EKVGEQAQVVIIDM(ox)NDPSNPIR_		EKVGEQAQVVIIDM(1)NDPSNPIR		EKVGEQAQVVIIDM(76.02)NDPSNPIR	0	0	1	1	P49951;F1MPU0	P49951	P49951	MULTI-MSMS	20140904-PurClathDigest-1ug-03	3	823.75	3	823.419839	2467.23769	23142.8	-5.2405	-0.0043152	0.42104	0.00034669	-4.8195	-0.0039685	823.754568127985	42.778	2.9691	42.778	41.931	44.9	0					420	90	9	0	0	0	0.017962	2	4920	76.015
EKVGEQAQVVIIDMNDPSNPIR	22	Oxidation (M)	_EKVGEQAQVVIIDM(ox)NDPSNPIR_		EKVGEQAQVVIIDM(1)NDPSNPIR		EKVGEQAQVVIIDM(58.09)NDPSNPIR	0	0	1	1	P49951;F1MPU0	P49951	P49951	MULTI-MSMS	20140904-PurClathDigest-1ug-03	3	823.75	3	823.419839	2467.23769	23233.98	-4.3961	-0.0036198	0.86074	0.00070875	-3.5354	-0.0029111	823.754781950925	44.926	2.4723	44.926	43.964	46.437	0					153	77	2	0	0	0	0.030077	1	5474	58.093
EKVGEQAQVVIIDMNDPSNPIR	22	Unmodified	_EKVGEQAQVVIIDMNDPSNPIR_					0	0	0	1	P49951;F1MPU0	P49951	P49951	MULTI-MSMS	20140904-PurClathDigest-1ug-02	2	818.42	3	818.088201	2451.24277	23500.45	-4.0754	-0.0033341	-0.049948	-4.0862E-05	-4.1254	-0.0033749	818.422907835206	46.349	1.0202	46.349	46.015	47.035	3.8147E-06					84	32	4	0	0	0	0.038765	1	6152	51.876
ELALSSPEDLTQDFEELKR	19	Unmodified	_ELALSSPEDLTQDFEELKR_					0	0	0	1	F1N3M8;G3MYP5	F1N3M8;G3MYP5	G3MYP5	MULTI-MSMS	20140904-PurClathDigest-1ug-02	2	741.04	3	740.705862	2219.09576	24469.17	-2.004	-0.0014844	1.9185	0.001421	-0.085555	-6.3371E-05	741.041460665237	51.281	0.65175	51.281	50.853	51.504	0					62	19	5	0	0	0	1.2991E-05	1	7376	103.88
ELALSSPEDLTQDFEELKR	19	Unmodified	_ELALSSPEDLTQDFEELKR_					0	0	0	1	F1N3M8;G3MYP5	F1N3M8;G3MYP5	G3MYP5	MULTI-MSMS	20140904-PurClathDigest-1ug-03	3	741.04	3	740.705862	2219.09576	24225.15	-2.812	-0.0020829	2.2527	0.0016686	-0.55935	-0.00041432	741.041355834254	51.311	0.45758	51.311	51.044	51.501	0					49	13	5	0	0	0	8.9239E-06	1	7124	106.57
ELDEWYAR	8	Unmodified	_ELDEWYAR_					0	0	0	0	P04973	P04973	P04973	MULTI-MSMS	20140904-PurClathDigest-1ug-01	1	541.25	2	541.251089	1080.48762	28536.84	-5.2476	-0.0028403	-0.083973	-4.5451E-05	-5.3316	-0.0028857	541.251034030008	43.471	1.1298	43.471	43.252	44.382	0					115	37	6	0	0	0	0.0010987	1	5944	122.18
ELDEWYAR	8	Unmodified	_ELDEWYAR_					0	0	0	0	P04973	P04973	P04973	MULTI-SECPEP	20140904-PurClathDigest-1ug-01	1	1081.57	1	1081.4949	1080.48762	20189.85	-5.5109	-0.00596	-0.53755	-0.00058135	-6.0485	-0.0065414	1081.49455871973	43.458	0.74358	43.458	43.281	44.024	0					72	24	5	0	0	0	0.00043009	1	5933	117.93
ELDEWYAR	8	Unmodified	_ELDEWYAR_					0	0	0	0	P04973	P04973	P04973	MULTI-MSMS	20140904-PurClathDigest-1ug-02	2	541.25	2	541.251089	1080.48762	28512.82	-4.8331	-0.0026159	-0.047833	-2.5889E-05	-4.8809	-0.0026418	541.250997106726	43.919	1.7903	43.919	43.608	45.398	0					141	55	6	0	0	0	0.0010657	1	5522	130.22
ELDEWYAR	8	Unmodified	_ELDEWYAR_					0	0	0	0	P04973	P04973	P04973	MULTI-MSMS	20140904-PurClathDigest-1ug-03	3	541.25	2	541.251089	1080.48762	28229.18	-5.141	-0.0027826	-0.096738	-5.236E-05	-5.2377	-0.0028349	541.250995406408	44	1.6412	44	43.771	45.412	0					129	50	6	0	0	0	0.0010847	1	5288	125.58
ELDEWYAR	8	Unmodified	_ELDEWYAR_					0	0	0	0	P04973	P04973	P04973	MULTI-SECPEP	20140904-PurClathDigest-1ug-03	3	1081.57	1	1081.4949	1080.48762	20145.9	-5.5427	-0.0059944	-0.65738	-0.00071095	-6.2001	-0.0067054	1081.49436425444	43.979	0.58808	43.979	43.801	44.389	0					59	17	5	0	0	0	0.013431	1	5280	69.998
ELIDLVLDR	9	Unmodified	_ELIDLVLDR_					0	0	0	0	Q2HJ86	Q2HJ86	Q2HJ86	MULTI-MSMS	20140904-PurClathDigest-1ug-01	1	543.31	2	543.313689	1084.61282	28925.04	-3.3303	-0.0018094	0.3482	0.00018918	-2.9821	-0.0016202	543.313890630091	50.321	0.40367	50.321	50.151	50.554	0					37	12	5	0	0	0	0.0004931	1	7762	128.28
ELIDLVLDR	9	Unmodified	_ELIDLVLDR_					0	0	0	0	Q2HJ86	Q2HJ86	Q2HJ86	MULTI-MSMS	20140904-PurClathDigest-1ug-02	2	543.31	2	543.313689	1084.61282	28359.94	-2.6379	-0.0014332	0.34966	0.00018997	-2.2883	-0.0012432	543.313842135661	50.659	0.31892	50.659	50.502	50.821	0					30	9	4	0	0	0	0.00026066	1	7216	166.07
ELIDLVLDR	9	Unmodified	_ELIDLVLDR_					0	0	0	0	Q2HJ86	Q2HJ86	Q2HJ86	MULTI-MSMS	20140904-PurClathDigest-1ug-03	3	543.31	2	543.313689	1084.61282	28770.1	-3.5097	-0.0019068	1.5145	0.00082283	-1.9952	-0.001084	543.314530231449	50.815	0.32525	50.815	50.656	50.981	0					30	9	4	0	0	0	0.00045701	1	6980	148.69
ELIVDAEDTWIR	12	Unmodified	_ELIVDAEDTWIR_					0	0	0	0	E1BKN2	E1BKN2	E1BKN2	MULTI-MSMS	20140904-PurClathDigest-1ug-03	3	730.88	2	730.375006	1458.73546	24815.57	-2.1675	-0.0015831	0.41726	0.00030476	-1.7503	-0.0012783	730.374643738411	50.393	0.62317	50.393	50.137	50.76	0					50	18	4	0	0	0	0.02248	1	6907	70.089
ELQEQLAQQQVHVEMDVAKPDLTAALR	27	Oxidation (M)	_ELQEQLAQQQVHVEM(ox)DVAKPDLTAALR_		ELQEQLAQQQVHVEM(1)DVAKPDLTAALR		ELQEQLAQQQVHVEM(134.03)DVAKPDLTAALR	0	0	1	1	Q28115	Q28115	Q28115	MULTI-MSMS	20140904-PurClathDigest-1ug-01	1	1026.53	3	1026.19591	3075.5659	20960.93	-4.1718	-0.0042811	0.51864	0.00053222	-3.6531	-0.0037488	1026.53092585792	45.239	0.89008	45.239	44.988	45.878	-3.8147E-06					151	29	8	0	0	0	1.4451E-05	2	6403	134.03
ELQEQLAQQQVHVEMDVAKPDLTAALR	27	Oxidation (M)	_ELQEQLAQQQVHVEM(ox)DVAKPDLTAALR_		ELQEQLAQQQVHVEM(1)DVAKPDLTAALR		ELQEQLAQQQVHVEM(133.46)DVAKPDLTAALR	0	0	1	1	Q28115	Q28115	Q28115	MULTI-MSMS	20140904-PurClathDigest-1ug-02	2	1026.53	3	1026.19591	3075.5659	20751.85	-2.5579	-0.0026249	-0.39323	-0.00040353	-2.9511	-0.0030284	1026.5301068259	45.769	0.85708	45.769	45.493	46.35	0					141	27	8	0	0	0	1.8365E-05	2	5975	133.46
ELQEQLAQQQVHVEMDVAKPDLTAALR	27	Oxidation (M)	_ELQEQLAQQQVHVEM(ox)DVAKPDLTAALR_		ELQEQLAQQQVHVEM(1)DVAKPDLTAALR		ELQEQLAQQQVHVEM(128.4)DVAKPDLTAALR	0	0	1	1	Q28115	Q28115	Q28115	MULTI-MSMS	20140904-PurClathDigest-1ug-03	3	1026.53	3	1026.19591	3075.5659	20882.81	-3.6454	-0.0037409	0.013129	1.3473E-05	-3.6323	-0.0037274	1026.86439966807	45.646	0.83825	45.646	45.381	46.219	3.8147E-06					125	26	8	0	0	0	5.3474E-05	2	5689	128.4
ELQEQLAQQQVHVEMDVAKPDLTAALR	27	Oxidation (M)	_ELQEQLAQQQVHVEM(ox)DVAKPDLTAALR_		ELQEQLAQQQVHVEM(1)DVAKPDLTAALR		ELQEQLAQQQVHVEM(81.97)DVAKPDLTAALR	0	0	1	1	Q28115	Q28115	Q28115	MULTI-SECPEP	20140904-PurClathDigest-1ug-03	3	770.15	4	769.898751	3075.5659	24290.94	-3.0761	-0.0023683	-0.79604	-0.00061287	-3.8721	-0.0029812	770.14918588237	45.651	1.1547	45.651	45.22	46.374	0					167	36	8	0	0	0	0.043079	1	5744	81.974
ELSSEPR	7	Unmodified	_ELSSEPR_					0	0	0	0	F1N3M8;G3MYP5	F1N3M8;G3MYP5	G3MYP5	MULTI-MSMS	20140904-PurClathDigest-1ug-01	1	409.2	2	409.20615	816.397747	32986.39	-6.4813	-0.0026522	0.30677	0.00012553	-6.1746	-0.0025267	409.206364780276	31.474	0.5985	31.474	31.211	31.809	0					43	18	3	0	0	0	0.043458	1	2846	81.784
ELSSEPR	7	Unmodified	_ELSSEPR_					0	0	0	0	F1N3M8;G3MYP5	F1N3M8;G3MYP5	G3MYP5	MULTI-MSMS	20140904-PurClathDigest-1ug-02	2	409.2	2	409.20615	816.397747	32709.41	-6.3085	-0.0025815	-0.057678	-2.3602E-05	-6.3662	-0.0026051	409.20604759755	31.505	0.58183	31.505	31.285	31.867	1.9073E-06					37	16	3	0	0	0	0.024151	1	2592	91.626
EMQFLMQK	8	2 Oxidation (M)	_EM(ox)QFLM(ox)QK_		EM(1)QFLM(1)QK		EM(71.34)QFLM(71.34)QK	0	0	2	0	F1N3M8;G3MYP5	F1N3M8;G3MYP5	G3MYP5	MULTI-MSMS	20140904-PurClathDigest-1ug-01	1	543.75	2	543.751553	1085.48855	27439.35	-6.4487	-0.0035065	0.41678	0.00022662	-6.0319	-0.0032799	543.752076075381	36.723	0.38792	36.723	36.493	36.881	3.8147E-06					49	11	6	0	0	0	0.031924	1	4171	71.342
EMQFLMQK	8	2 Oxidation (M)	_EM(ox)QFLM(ox)QK_		EM(1)QFLM(1)QK		EM(68.79)QFLM(68.79)QK	0	0	2	0	F1N3M8;G3MYP5	F1N3M8;G3MYP5	G3MYP5	MULTI-MSMS	20140904-PurClathDigest-1ug-02	2	543.75	2	543.751553	1085.48855	28311.61	-5.4711	-0.0029749	-0.58508	-0.00031814	-6.0562	-0.0032931	543.751590823136	36.939	0.55742	36.939	36.736	37.293	0					51	15	5	0	0	0	0.035064	1	3820	68.787
EMQFLMQK	8	2 Oxidation (M)	_EM(ox)QFLM(ox)QK_		EM(1)QFLM(1)QK		EM(63.21)QFLM(63.21)QK	0	0	2	0	F1N3M8;G3MYP5	F1N3M8;G3MYP5	G3MYP5	MULTI-MSMS	20140904-PurClathDigest-1ug-03	3	543.75	2	543.751553	1085.48855	27174.37	-6.2157	-0.0033798	-0.51188	-0.00027833	-6.7276	-0.0036581	543.75159563975	36.928	0.82042	36.928	36.692	37.513	0					55	21	5	0	0	0	0.041916	1	3625	63.21
EMQYFMQQWTGTNK	14	2 Oxidation (M)	_EM(ox)QYFM(ox)QQWTGTNK_		EM(1)QYFM(1)QQWTGTNK		EM(53.3)QYFM(53.3)QQWTGTNK	0	0	2	0	F1N1S2	F1N1S2	F1N1S2	MULTI-MSMS	20140904-PurClathDigest-1ug-02	2	912.89	2	912.390004	1822.76546	21691.65	-3.8897	-0.0035489	-2.291	-0.0020903	-6.1807	-0.0056392	912.889744505663	42.223	0.47492	42.223	41.995	42.47	0					45	14	5	0	0	0	0.030442	1	5128	53.3
EMQYFMQQWTGTNK	14	2 Oxidation (M)	_EM(ox)QYFM(ox)QQWTGTNK_		EM(1)QYFM(1)QQWTGTNK		EM(69.26)QYFM(69.26)QQWTGTNK	0	0	2	0	F1N1S2	F1N1S2	F1N1S2	MULTI-MSMS	20140904-PurClathDigest-1ug-03	3	912.88	2	912.390004	1822.76546	21756.77	-5.3213	-0.0048551	-1.9487	-0.001778	-7.27	-0.0066331	912.890070239653	42.214	0.43625	42.214	42.001	42.437	0					50	12	6	0	0	0	0.0059272	1	4869	69.258
ENPYYDSR	8	Unmodified	_ENPYYDSR_					0	0	0	0	P49951;F1MPU0	P49951	P49951	MULTI-MSMS	20140904-PurClathDigest-1ug-01	1	522.22	2	522.225071	1042.43559	28676.66	-6.9761	-0.0036431	0.62144	0.00032453	-6.3547	-0.0033186	522.225452892685	34.921	2.1306	34.921	34.493	36.623	0					181	66	5	0	0	0	0.0010343	2	3768	134.15
ENPYYDSR	8	Unmodified	_ENPYYDSR_					0	0	0	0	P49951;F1MPU0	P49951	P49951	MULTI-MSMS	20140904-PurClathDigest-1ug-02	2	522.22	2	522.225071	1042.43559	28783.61	-7.0997	-0.0037077	0.7972	0.00041632	-6.3025	-0.0032913	522.225549579241	35.344	2.5702	35.344	34.855	37.425	0					169	74	5	0	0	0	0.0033132	2	3411	114.28
ENPYYDSR	8	Unmodified	_ENPYYDSR_					0	0	0	0	P49951;F1MPU0	P49951	P49951	MULTI-MSMS	20140904-PurClathDigest-1ug-03	3	522.22	2	522.225071	1042.43559	28868.2	-7.577	-0.0039569	0.92742	0.00048432	-6.6495	-0.0034726	522.225639397049	35.224	2.7426	35.224	34.812	37.554	0					175	76	5	0	0	0	0.0010213	3	3296	141.93
EPTPYPDER	9	Unmodified	_EPTPYPDER_					0	0	0	0	G3MYP5	G3MYP5	G3MYP5	MULTI-MSMS	20140904-PurClathDigest-1ug-02	2	552.25	2	552.253828	1102.4931	28285.19	-6.8915	-0.0038059	-1.4106	-0.00077899	-8.3021	-0.0045849	552.253253427343	35.024	0.41933	35.024	34.784	35.204	0					25	11	3	0	0	0	0.00048436	1	3391	136.99
EQDVVQEWR	9	Unmodified	_EQDVVQEWR_					0	0	0	0	F1N3M8;G3MYP5	F1N3M8;G3MYP5	G3MYP5	MULTI-MSMS	20140904-PurClathDigest-1ug-02	2	594.78	2	594.785827	1187.5571	27422.94	-4.7546	-0.002828	-0.38094	-0.00022658	-5.1356	-0.0030546	594.785653747998	41.444	0.395	41.444	41.269	41.664	0					28	11	3	0	0	0	0.00019273	1	4918	169.41
EQDVVQEWR	9	Unmodified	_EQDVVQEWR_					0	0	0	0	F1N3M8;G3MYP5	F1N3M8;G3MYP5	G3MYP5	MULTI-MSMS	20140904-PurClathDigest-1ug-03	3	594.78	2	594.785827	1187.5571	27460.15	-4.8352	-0.0028759	-1.1774	-0.00070029	-6.0125	-0.0035762	594.785304318255	41.432	0.59467	41.432	41.233	41.828	0					36	17	4	0	0	0	0.00012236	1	4676	178.32
EQLMASDDFGR	11	Oxidation (M)	_EQLM(ox)ASDDFGR_		EQLM(1)ASDDFGR		EQLM(86.46)ASDDFGR	0	0	1	0	E1BFB0	E1BFB0	E1BFB0	MULTI-MSMS	20140904-PurClathDigest-1ug-02	2	642.78	2	642.779884	1283.54522	25926.21	-4.8978	-0.0031482	0.178	0.00011442	-4.7198	-0.0030338	642.779964548391	38.772	0.4135	38.772	38.612	39.026	3.8147E-06					29	11	4	0	0	0	0.06188	1	4278	86.463
EQLMASDDFGR	11	Oxidation (M)	_EQLM(ox)ASDDFGR_		EQLM(1)ASDDFGR		EQLM(86.46)ASDDFGR	0	0	1	0	E1BFB0	E1BFB0	E1BFB0	MULTI-MSMS	20140904-PurClathDigest-1ug-03	3	642.78	2	642.779884	1283.54522	26435.45	-4.8377	-0.0031096	0.90807	0.00058369	-3.9296	-0.0025259	642.780231333544	38.919	0.467	38.919	38.676	39.143	0					22	12	3	0	0	0	0.06188	1	4093	86.463
EQLQGLNDR	9	Unmodified	_EQLQGLNDR_					0	0	0	0	F1MDZ2;Q08DH7	F1MDZ2;Q08DH7	F1MDZ2	MULTI-MSMS	20140904-PurClathDigest-1ug-01	1	536.77	2	536.772719	1071.53089	28807.45	-5.4944	-0.0029492	-0.13055	-7.0075E-05	-5.625	-0.0030193	536.772941935162	36.205	1.0475	36.205	35.931	36.978	0					71	32	5	0	0	0	0.005422	1	4033	106.2
EQLQGLNDR	9	Unmodified	_EQLQGLNDR_					0	0	0	0	F1MDZ2;Q08DH7	F1MDZ2;Q08DH7	F1MDZ2	MULTI-MSMS	20140904-PurClathDigest-1ug-02	2	536.77	2	536.772719	1071.53089	28765.2	-5.1041	-0.0027397	-0.15593	-8.37E-05	-5.26	-0.0028234	536.772943156384	36.371	0.90575	36.371	36.153	37.058	0					64	25	6	0	0	0	0.0042314	1	3683	109.66
EQLQVLNDR	9	Unmodified	_EQLQVLNDR_					0	0	0	0	F1MSQ6	F1MSQ6	F1MSQ6	MULTI-MSMS	20140904-PurClathDigest-1ug-01	1	557.79	2	557.796195	1113.57784	29011.62	-5.0141	-0.0027968	1.1093	0.00061874	-3.9049	-0.0021781	557.796315297358	39.555	0.3605	39.555	39.4	39.76	0					26	11	4	0	0	0	0.00047622	1	4934	145.23
EQLQVLNDR	9	Unmodified	_EQLQVLNDR_					0	0	0	0	F1MSQ6	F1MSQ6	F1MSQ6	MULTI-MSMS	20140904-PurClathDigest-1ug-02	2	557.79	2	557.796195	1113.57784	30142.83	-4.3318	-0.0024163	0.68052	0.00037959	-3.6513	-0.0020367	557.796094025759	39.952	0.329	39.952	39.782	40.111	0					21	9	4	0	0	0	0.00048866	1	4560	132.22
EQLQVLNDR	9	Unmodified	_EQLQVLNDR_					0	0	0	0	F1MSQ6	F1MSQ6	F1MSQ6	MULTI-MSMS	20140904-PurClathDigest-1ug-03	3	557.79	2	557.796195	1113.57784	28559.32	-3.9556	-0.0022064	1.0066	0.00056147	-2.949	-0.0016449	557.796269553567	40.022	0.47775	40.022	39.818	40.296	0					29	13	4	0	0	0	0.0004877	1	4341	133.23
ERFEEEAR	8	Unmodified	_ERFEEEAR_					0	0	0	1	F1MDZ2;O77788	F1MDZ2	F1MDZ2	MULTI-MSMS	20140904-PurClathDigest-1ug-01	1	355.83	3	355.836839	1064.48869	35374.34	-6.3677	-0.0022659	0.5205	0.00018521	-5.8472	-0.0020807	355.837036306215	32.335	0.27425	32.335	32.184	32.458	0					25	8	4	0	0	0	0.00098421	1	3064	133.23
ERFEEEAR	8	Unmodified	_ERFEEEAR_					0	0	0	1	F1MDZ2;O77788	F1MDZ2	F1MDZ2	MULTI-MSMS	20140904-PurClathDigest-1ug-02	2	355.83	3	355.836839	1064.48869	34922.84	-6.2275	-0.002216	0.22113	7.8687E-05	-6.0064	-0.0021373	355.836965025077	32.445	0.34592	32.445	32.29	32.636	0					32	9	5	0	0	0	0.00025422	1	2791	151.44
ERFEEEAR	8	Unmodified	_ERFEEEAR_					0	0	0	1	F1MDZ2;O77788	F1MDZ2	F1MDZ2	MULTI-MSMS	20140904-PurClathDigest-1ug-02	2	533.25	2	533.25162	1064.48869	26965.34	-6.4818	-0.0034564	-0.66732	-0.00035585	-7.1491	-0.0038123	533.251082975994	32.443	0.34592	32.443	32.29	32.636	-3.8147E-06					31	9	4	0	0	0	0.00010575	1	2795	204.86
ERFEEEAR	8	Unmodified	_ERFEEEAR_					0	0	0	1	F1MDZ2;O77788	F1MDZ2	F1MDZ2	MULTI-MSMS	20140904-PurClathDigest-1ug-03	3	355.83	3	355.836839	1064.48869	34738.27	-6.4462	-0.0022938	0.72088	0.00025652	-5.7254	-0.0020373	355.837109928937	32.557	0.31908	32.557	32.399	32.718	0					28	8	4	0	0	0	0.00059443	1	2653	138.4
ERLQEELSQAER	12	Unmodified	_ERLQEELSQAER_					0	0	0	1	F1MIC9	F1MIC9	F1MIC9	MULTI-MSMS	20140904-PurClathDigest-1ug-01	1	744.37	2	744.376069	1486.73758	24960.29	-5.4754	-0.0040758	0.26849	0.00019986	-5.207	-0.0038759	744.376298639361	38.505	0.60542	38.505	38.207	38.813	0					34	19	4	0	0	0	2.4449E-35	1	4652	335.69
ERVEELTTDLEILKAEIEEK	20	Unmodified	_ERVEELTTDLEILKAEIEEK_					0	0	0	2	F1MIC9	F1MIC9	F1MIC9	MULTI-MSMS	20140904-PurClathDigest-1ug-01	1	796.76	3	796.423243	2386.2479	23354.25	-1.5806	-0.0012588	0.15183	0.00012092	-1.4287	-0.0011379	796.757982186628	52.721	0.37125	52.721	52.566	52.937	0					42	11	5	0	0	0	7.8392E-14	1	8390	201.52
ERVEELTTDLEILKAEIEEK	20	Unmodified	_ERVEELTTDLEILKAEIEEK_					0	0	0	2	F1MIC9	F1MIC9	F1MIC9	MULTI-MSMS	20140904-PurClathDigest-1ug-02	2	796.76	3	796.423243	2386.2479	23388.9	-2.018	-0.0016072	-0.069255	-5.5156E-05	-2.0873	-0.0016623	796.757492897569	52.827	0.35583	52.827	52.659	53.015	3.8147E-06					40	9	5	0	0	0	8.0867E-19	1	7749	222.6
ERVEELTTDLEILKAEIEEK	20	Unmodified	_ERVEELTTDLEILKAEIEEK_					0	0	0	2	F1MIC9	F1MIC9	F1MIC9	MULTI-MSMS	20140904-PurClathDigest-1ug-03	3	796.76	3	796.423243	2386.2479	23800.05	-1.5165	-0.0012077	-0.17306	-0.00013783	-1.6895	-0.0013456	796.757494823124	52.871	0.50358	52.871	52.609	53.113	0					46	13	5	0	0	0	1.6658E-07	1	7484	152.13
ESEPPKLIDEETNIIQPSTEHTYSK	25	Unmodified	_ESEPPKLIDEETNIIQPSTEHTYSK_					0	0	0	1	F1MEW3	F1MEW3	F1MEW3	MULTI-MSMS	20140904-PurClathDigest-1ug-01	1	962.8	3	962.473214	2884.39781	21839.08	-5.4278	-0.0052241	0.66085	0.00063605	-4.7669	-0.004588	962.80815315553	42.203	0.68742	42.203	41.913	42.6	0					85	22	6	0	0	0	0.00010726	1	5613	99.957
ESEPPKLIDEETNIIQPSTEHTYSK	25	Unmodified	_ESEPPKLIDEETNIIQPSTEHTYSK_					0	0	0	1	F1MEW3	F1MEW3	F1MEW3	MULTI-MSMS	20140904-PurClathDigest-1ug-02	2	962.8	3	962.473214	2884.39781	21610.3	-4.5508	-0.00438	0.21335	0.00020534	-4.3374	-0.0041747	962.807648188385	42.391	0.66308	42.391	42.063	42.726	0					95	20	6	0	0	0	5.5631E-06	1	5150	125.31
ESEPPKLIDEETNIIQPSTEHTYSK	25	Unmodified	_ESEPPKLIDEETNIIQPSTEHTYSK_					0	0	0	1	F1MEW3	F1MEW3	F1MEW3	MULTI-MSMS	20140904-PurClathDigest-1ug-03	3	962.8	3	962.473214	2884.39781	21650.86	-5.3354	-0.0051352	0.72441	0.00069722	-4.611	-0.0044379	962.808040256751	42.519	0.82009	42.519	42.143	42.963	0					107	24	7	0	0	0	0.0082909	1	4930	75.106
ESKEETPEVTK	11	Unmodified	_ESKEETPEVTK_					0	0	0	1	F1N1S2	F1N1S2	F1N1S2	MULTI-MSMS	20140904-PurClathDigest-1ug-01	1	638.81	2	638.81699	1275.61943	28860.44	-5.5828	-0.0035664	-0.3934	-0.00025131	-5.9762	-0.0038177	638.817496777818	31.181	0.205	31.181	31.075	31.28	0					18	5	4	0	0	0	0.00024747	1	2788	136.93
ESKEETPGTEWEK	13	Unmodified	_ESKEETPGTEWEK_					0	0	0	1	P04975;G3N252	P04975	P04975	MULTI-MSMS	20140904-PurClathDigest-1ug-01	1	775.35	2	775.354468	1548.69438	24197.54	-6.6668	-0.0051691	0.10277	7.9684E-05	-6.564	-0.0050895	775.354905208925	35.482	2.2454	35.482	35.099	37.344	0					253	70	6	0	0	0	3.6106E-08	5	3816	207.31
ESKEETPGTEWEK	13	Unmodified	_ESKEETPGTEWEK_					0	0	0	1	P04975;G3N252	P04975	P04975	MULTI-MSMS	20140904-PurClathDigest-1ug-01	1	517.24	3	517.238737	1548.69438	29108.38	-6.792	-0.0035131	0.15587	8.062E-05	-6.6361	-0.0034325	517.238965359229	35.48	2.0608	35.48	35.099	37.16	0					243	64	7	0	0	0	0.035476	2	3881	60.157
ESKEETPGTEWEK	13	Unmodified	_ESKEETPGTEWEK_					0	0	0	1	P04975;G3N252	P04975	P04975	MULTI-MSMS	20140904-PurClathDigest-1ug-02	2	775.35	2	775.354468	1548.69438	24244.59	-6.6016	-0.0051186	-0.12396	-9.6111E-05	-6.7256	-0.0052147	775.354771357842	35.858	2.5798	35.858	35.463	38.043	0					269	75	6	0	0	0	1.4978E-13	5	3531	245.4
ESKEETPGTEWEK	13	Unmodified	_ESKEETPGTEWEK_					0	0	0	1	P04975;G3N252	P04975	P04975	MULTI-MSMS	20140904-PurClathDigest-1ug-02	2	517.24	3	517.238737	1548.69438	29420.48	-6.5587	-0.0033924	-0.31659	-0.00016375	-6.8752	-0.0035561	517.238734749587	35.853	2.6573	35.853	35.353	38.011	0					227	77	6	0	0	0	0.0045674	4	3596	88.101
ESKEETPGTEWEK	13	Unmodified	_ESKEETPGTEWEK_					0	0	0	1	P04975;G3N252	P04975	P04975	MULTI-MSMS	20140904-PurClathDigest-1ug-03	3	775.35	2	775.354468	1548.69438	24201.36	-7.3652	-0.0057107	0.30998	0.00024035	-7.0553	-0.0054703	775.355185950746	35.762	2.5472	35.762	35.407	37.954	0					254	70	6	0	0	0	1.2506E-13	5	3338	249.3
ESKEETPGTEWEK	13	Unmodified	_ESKEETPGTEWEK_					0	0	0	1	P04975;G3N252	P04975	P04975	MULTI-MSMS	20140904-PurClathDigest-1ug-03	3	517.57	3	517.238737	1548.69438	29424.82	-6.9471	-0.0035933	-0.24575	-0.00012711	-7.1928	-0.0037204	517.238840574906	35.764	2.7713	35.764	35.33	38.101	0					238	76	6	0	0	0	0.0013951	4	3342	89.451
ESLKPAAKPLPSK	13	Unmodified	_ESLKPAAKPLPSK_					0	0	0	2	F1N1S2	F1N1S2	F1N1S2	MULTI-MSMS	20140904-PurClathDigest-1ug-01	1	455.94	3	455.941527	1364.80275	31488.17	-7.2996	-0.0033282	0.45419	0.00020708	-6.8454	-0.0031211	455.941751904257	32.003	0.53183	32.003	31.776	32.308	0					53	16	5	0	0	0	0.041169	1	2969	67.102
ESLKPAAKPLPSK	13	Unmodified	_ESLKPAAKPLPSK_					0	0	0	2	F1N1S2	F1N1S2	F1N1S2	MULTI-MSMS	20140904-PurClathDigest-1ug-01	1	683.4	2	683.408652	1364.80275	25329.06	-7.4545	-0.0050945	0.52432	0.00035833	-6.9302	-0.0047361	683.408909971659	31.993	0.40617	31.993	31.809	32.215	0					36	12	4	0	0	0	0.00055717	1	2974	158.31
ESLKPAAKPLPSK	13	Unmodified	_ESLKPAAKPLPSK_					0	0	0	2	F1N1S2	F1N1S2	F1N1S2	MULTI-MSMS	20140904-PurClathDigest-1ug-02	2	455.94	3	455.941527	1364.80275	31154.91	-7.1511	-0.0032605	0.41991	0.00019146	-6.7311	-0.003069	455.941714904761	32.112	0.52391	32.112	31.903	32.427	0					49	14	5	0	0	0	0.024054	1	2706	77.776
ESLKPAAKPLPSK	13	Unmodified	_ESLKPAAKPLPSK_					0	0	0	2	F1N1S2	F1N1S2	F1N1S2	MULTI-MSMS	20140904-PurClathDigest-1ug-02	2	683.4	2	683.408652	1364.80275	25513.54	-7.5191	-0.0051386	0.23689	0.00016189	-7.2822	-0.0049767	683.408903052728	32.11	0.348	32.11	31.942	32.29	-3.8147E-06					27	9	4	0	0	0	0.032214	1	2720	119.17
ESLKPAAKPLPSK	13	Unmodified	_ESLKPAAKPLPSK_					0	0	0	2	F1N1S2	F1N1S2	F1N1S2	MULTI-MSMS	20140904-PurClathDigest-1ug-03	3	455.94	3	455.941527	1364.80275	31365.46	-7.4281	-0.0033868	0.035791	1.6319E-05	-7.3923	-0.0033705	455.941525013265	32.18	0.5215	32.18	31.983	32.504	0					40	13	5	0	0	0	0.049275	1	2562	70.165
ESNCYDPERVK	11	Unmodified	_ESNCYDPERVK_					0	0	0	1	P49951;F1MPU0	P49951	P49951	MULTI-MSMS	20140904-PurClathDigest-1ug-02	2	670.3	2	670.300984	1338.58741	26456.4	-4.6869	-0.0031417	-1.2824	-0.00085956	-5.9693	-0.0040012	670.300350702479	36.34	0.36975	36.34	36.085	36.455	0					28	10	4	0	0	0	2.0198E-06	1	3728	167.2
ESNCYDPERVK	11	Unmodified	_ESNCYDPERVK_					0	0	0	1	P49951;F1MPU0	P49951	P49951	MULTI-MSMS	20140904-PurClathDigest-1ug-03	3	670.3	2	670.300984	1338.58741	24683.55	-5.2752	-0.003536	-1.2558	-0.00084176	-6.531	-0.0043777	670.300489667917	36.26	0.37767	36.26	36.023	36.4	0					27	10	3	0	0	0	1.9597E-06	1	3518	173.04
ESPEVLLTLDILK	13	Unmodified	_ESPEVLLTLDILK_					0	0	0	0	E1BDX8	E1BDX8	E1BDX8	MULTI-MSMS	20140904-PurClathDigest-1ug-01	1	735.43	2	735.426707	1468.83886	24532.33	-0.77087	-0.00056692	-0.42208	-0.00031041	-1.193	-0.00087733	735.426468199063	55.407	0.72684	55.407	55.132	55.859	0					51	20	3	0	0	0	0.0044739	1	9077	83.243
ESSPLYSPSLSDSTSAVK	18	Unmodified	_ESSPLYSPSLSDSTSAVK_					0	0	0	0	F1N1S2	F1N1S2	F1N1S2	MULTI-MSMS	20140904-PurClathDigest-1ug-02	2	927.95	2	927.952003	1853.88945	21899.77	-3.6854	-0.0034199	-0.62523	-0.00058019	-4.3107	-0.0040001	927.951801096481	42.433	0.444	42.433	42.187	42.631	0					49	13	5	0	0	0	0.023207	1	5165	56.819
ESTFLDEGPDDEQEVPPLEHTPQSPWASDFK	31	Unmodified	_ESTFLDEGPDDEQEVPPLEHTPQSPWASDFK_					0	0	0	0	G3MYP5	G3MYP5	G3MYP5	MULTI-MSMS	20140904-PurClathDigest-1ug-02	2	1177.2	3	1176.53023	3526.56885	19219.23	-3.6659	-0.004313	0.82321	0.00096854	-2.8427	-0.0033445	1176.86553133192	49.862	0.76476	49.862	49.507	50.272	0					98	22	7	0	0	0	0.026336	1	7005	49.967
ESTFLDEGPDDEQEVPPLEHTPQSPWASDFK	31	Unmodified	_ESTFLDEGPDDEQEVPPLEHTPQSPWASDFK_					0	0	0	0	G3MYP5	G3MYP5	G3MYP5	MULTI-MSMS	20140904-PurClathDigest-1ug-03	3	1177.2	3	1176.53023	3526.56885	19364.47	-2.9732	-0.003498	-0.35459	-0.00041719	-3.3278	-0.0039152	1176.86417248395	50.038	0.61417	50.038	49.78	50.394	0					94	18	7	0	0	0	0.045896	1	6785	39.302
ESVQEAFDTVSPMHK	15	Oxidation (M)	_ESVQEAFDTVSPM(ox)HK_		ESVQEAFDTVSPM(1)HK		ESVQEAFDTVSPM(140.27)HK	0	0	1	0	F1MEW3	F1MEW3	F1MEW3	MULTI-MSMS	20140904-PurClathDigest-1ug-01	1	861.39	2	860.895977	1719.7774	23572.3	-5.0867	-0.0043791	1.2342	0.0010625	-3.8525	-0.0033166	861.399355341599	42.083	0.69776	42.083	41.632	42.33	0					59	22	4	0	0	0	4.9056E-05	1	5572	140.27
ESVQEAFDTVSPMHK	15	Oxidation (M)	_ESVQEAFDTVSPM(ox)HK_		ESVQEAFDTVSPM(1)HK		ESVQEAFDTVSPM(128.71)HK	0	0	1	0	F1MEW3	F1MEW3	F1MEW3	MULTI-MSMS	20140904-PurClathDigest-1ug-02	2	860.89	2	860.895977	1719.7774	22943.76	-4.9051	-0.0042228	0.98509	0.00084806	-3.92	-0.0033747	861.398806505402	42.269	0.732	42.269	41.832	42.564	0					63	22	4	0	0	0	0.0014138	1	5110	128.71
ESVQEAFDTVSPMHK	15	Oxidation (M)	_ESVQEAFDTVSPM(ox)HK_		ESVQEAFDTVSPM(1)HK		ESVQEAFDTVSPM(125.36)HK	0	0	1	0	F1MEW3	F1MEW3	F1MEW3	MULTI-MSMS	20140904-PurClathDigest-1ug-03	3	860.89	2	860.895977	1719.7774	23006.38	-5.6869	-0.0048958	0.59023	0.00050812	-5.0967	-0.0043877	860.8974228034	42.3	0.73875	42.3	41.861	42.6	0					68	21	4	0	0	0	0.00018648	2	4921	125.36
ESYVETELIFALAK	14	Unmodified	_ESYVETELIFALAK_					0	0	0	0	P49951;F1MPU0	P49951	P49951	MULTI-MSMS	20140904-PurClathDigest-1ug-01	1	806.93	2	806.927071	1611.83959	23334.87	-1.9435	-0.0015682	-0.013435	-1.0841E-05	-1.9569	-0.0015791	806.927522043766	54.845	2.9998	54.845	54.16	57.16	0					437	81	7	0	0	0	0.0019422	10	9280	89.231
ESYVETELIFALAK	14	Unmodified	_ESYVETELIFALAK_					0	0	0	0	P49951;F1MPU0	P49951	P49951	MULTI-MSMS	20140904-PurClathDigest-1ug-01	1	806.93	2	806.927071	1611.83959	23519.57	-2.3312	-0.0018811	0.80188	0.00064705	-1.5293	-0.001234	806.927555044129	57.945	3.3267	57.945	57.055	60.382	0					149	61	5	0	0	0	0.011331	4	9536	70.889
ESYVETELIFALAK	14	Unmodified	_ESYVETELIFALAK_					0	0	0	0	P49951;F1MPU0	P49951	P49951	MULTI-MSMS	20140904-PurClathDigest-1ug-01	1	806.93	2	806.927071	1611.83959	23458.58	-2.8419	-0.0022932	-2.0167	-0.0016273	-4.8586	-0.0039205	806.925330092169	61.333	5.2331	61.333	59.741	64.974	0					218	132	2	0	0	0	0.010408	3	10082	71.879
ESYVETELIFALAK	14	Unmodified	_ESYVETELIFALAK_					0	0	0	0	P49951;F1MPU0	P49951	P49951	MULTI-MSMS	20140904-PurClathDigest-1ug-02	2	806.93	2	806.927071	1611.83959	23420.91	-2.067	-0.0016679	-0.096604	-7.7952E-05	-2.1636	-0.0017458	806.927421306552	55.276	2.9907	55.276	54.565	57.555	0					303	69	5	0	0	0	0.0019422	6	8530	89.231
ESYVETELIFALAK	14	Unmodified	_ESYVETELIFALAK_					0	0	0	0	P49951;F1MPU0	P49951	P49951	MULTI-MSMS	20140904-PurClathDigest-1ug-02	2	806.92	2	806.927071	1611.83959	23393.72	-1.6271	-0.0013129	-0.41692	-0.00033643	-2.044	-0.0016493	806.926715293225	57.934	2.2903	57.934	57.221	59.511	3.8147E-06					143	40	4	0	0	0	0.002761	3	8724	80.96
ESYVETELIFALAK	14	Unmodified	_ESYVETELIFALAK_					0	0	0	0	P49951;F1MPU0	P49951	P49951	MULTI-MSMS	20140904-PurClathDigest-1ug-02	2	806.92	2	806.927071	1611.83959	23731.91	-2.4619	-0.0019865	-1.4944	-0.0012059	-3.9563	-0.0031924	806.925395667596	62.092	3.6967	62.092	61.085	64.781	0					284	132	3	0	0	0	0.023871	1	9260	57.434
ESYVETELIFALAK	14	Unmodified	_ESYVETELIFALAK_					0	0	0	0	P49951;F1MPU0	P49951	P49951	MULTI-MSMS	20140904-PurClathDigest-1ug-03	3	807.43	2	806.927071	1611.83959	23454.08	-2.1205	-0.0017111	-0.59521	-0.00048029	-2.7157	-0.0021914	806.927011094972	55.307	2.6589	55.307	54.716	57.375	-3.8147E-06					279	59	5	0	0	0	4.4924E-10	7	7941	167.73
ESYVETELIFALAK	14	Unmodified	_ESYVETELIFALAK_					0	0	0	0	P49951;F1MPU0	P49951	P49951	MULTI-MSMS	20140904-PurClathDigest-1ug-03	3	806.93	2	806.927071	1611.83959	23214.26	-2.597	-0.0020956	-0.21503	-0.00017352	-2.8121	-0.0022691	806.925917926513	61.708	3.7678	61.708	61.011	64.779	-3.8147E-06					214	132	4	0	0	0	0.0084988	1	8914	73.927
ETAPDQKDQAPER	13	Unmodified	_ETAPDQKDQAPER_					0	0	0	1	F1N3M8;G3MYP5	F1N3M8;G3MYP5	G3MYP5	MULTI-MSMS	20140904-PurClathDigest-1ug-02	2	495.57	3	495.57071	1483.6903	29816.9	-5.316	-0.0026344	0.10994	5.4481E-05	-5.206	-0.00258	495.570749923348	30.621	0.35508	30.621	30.418	30.773	-1.9073E-06					16	10	2	0	0	0	0.0046133	1	2384	89.46
ETAPDQKDQAPER	13	Unmodified	_ETAPDQKDQAPER_					0	0	0	1	F1N3M8;G3MYP5	F1N3M8;G3MYP5	G3MYP5	MULTI-MSMS	20140904-PurClathDigest-1ug-03	3	495.57	3	495.57071	1483.6903	29800.52	-5.1416	-0.002548	0.10037	4.9741E-05	-5.0412	-0.0024983	495.570856993234	30.635	0.30333	30.635	30.503	30.807	1.9073E-06					25	8	5	0	0	0	0.0012319	1	2252	96.745
ETPTLSEQESTLAEKEPHLK	20	Unmodified	_ETPTLSEQESTLAEKEPHLK_					0	0	0	1	F1MEW3	F1MEW3	F1MEW3	MULTI-MSMS	20140904-PurClathDigest-1ug-01	1	756.72	3	756.3849	2266.13287	24335.38	-6.0317	-0.0045623	-0.26854	-0.00020312	-6.3003	-0.0047654	756.719140733999	40.429	1.132	40.429	39.884	41.016	0					152	36	7	0	0	0	0.013027	2	5160	72.568
ETPTLSEQESTLAEKEPHLK	20	Unmodified	_ETPTLSEQESTLAEKEPHLK_					0	0	0	1	F1MEW3	F1MEW3	F1MEW3	MULTI-MSMS	20140904-PurClathDigest-1ug-01	1	1134.57	2	1134.07371	2266.13287	19979.93	-6.4269	-0.0072886	-0.078363	-8.887E-05	-6.5053	-0.0073774	1134.57508173935	40.432	0.73158	40.432	39.944	40.676	0					88	23	5	0	0	0	9.7764E-05	1	5147	103.41
ETPTLSEQESTLAEKEPHLK	20	Unmodified	_ETPTLSEQESTLAEKEPHLK_					0	0	0	1	F1MEW3	F1MEW3	F1MEW3	MULTI-MSMS	20140904-PurClathDigest-1ug-02	2	756.72	3	756.3849	2266.13287	24275.27	-5.7028	-0.0043135	-0.26271	-0.00019871	-5.9655	-0.0045122	756.719154475821	40.824	1.2243	40.824	40.345	41.569	0					133	37	6	0	0	0	0.016998	2	4780	67.928
ETPTLSEQESTLAEKEPHLK	20	Unmodified	_ETPTLSEQESTLAEKEPHLK_					0	0	0	1	F1MEW3	F1MEW3	F1MEW3	MULTI-MSMS	20140904-PurClathDigest-1ug-02	2	1134.57	2	1134.07371	2266.13287	19532.97	-6.1058	-0.0069244	-0.53376	-0.00060532	-6.6396	-0.0075298	1134.57457685689	40.816	0.64758	40.816	40.377	41.025	-3.8147E-06					73	19	5	0	0	0	1.0531E-05	1	4767	110.6
ETPTLSEQESTLAEKEPHLK	20	Unmodified	_ETPTLSEQESTLAEKEPHLK_					0	0	0	1	F1MEW3	F1MEW3	F1MEW3	MULTI-MSMS	20140904-PurClathDigest-1ug-03	3	756.72	3	756.3849	2266.13287	24282.94	-6.2619	-0.0047364	0.20048	0.00015164	-6.0614	-0.0045848	756.719506835182	40.785	1.5003	40.785	40.262	41.763	0					145	45	6	0	0	0	0.00052941	2	4552	88.176
ETPTLSEQESTLAEKEPHLK	20	Unmodified	_ETPTLSEQESTLAEKEPHLK_					0	0	0	1	F1MEW3	F1MEW3	F1MEW3	MULTI-MSMS	20140904-PurClathDigest-1ug-03	3	1134.58	2	1134.07371	2266.13287	19209.37	-6.6888	-0.0075856	-1.0436	-0.0011835	-7.7324	-0.0087691	1134.57445736499	40.787	0.65067	40.787	40.398	41.049	0					68	19	5	0	0	0	1.0722E-08	1	4531	144.33
ETSLDISSK	9	Unmodified	_ETSLDISSK_					0	0	0	0	F1N3M8;G3MYP5	F1N3M8;G3MYP5	G3MYP5	MULTI-MSMS	20140904-PurClathDigest-1ug-01	1	490.25	2	490.250754	978.486955	30331.81	-5.3398	-0.0026178	1.5653	0.0007674	-3.7745	-0.0018504	490.251286217335	36.197	0.59442	36.197	35.931	36.525	0					46	18	4	0	0	0	0.039678	1	4060	79.489
ETSPESSLIQDEIAIK	16	Unmodified	_ETSPESSLIQDEIAIK_					0	0	0	0	F1MEW3	F1MEW3	F1MEW3	MULTI-MSMS	20140904-PurClathDigest-1ug-02	2	880.45	2	880.451639	1758.88872	22594.56	-3.9022	-0.0034357	-1.8815	-0.0016566	-5.7837	-0.0050923	880.951923578742	47.371	0.69308	47.371	46.911	47.604	0					52	21	4	0	0	0	0.001028	1	6414	98.281
ETSPESSLIQDEIAIK	16	Unmodified	_ETSPESSLIQDEIAIK_					0	0	0	0	F1MEW3	F1MEW3	F1MEW3	MULTI-MSMS	20140904-PurClathDigest-1ug-03	3	880.45	2	880.451639	1758.88872	23076.1	-4.2183	-0.003714	-2.1	-0.0018489	-6.3183	-0.005563	880.449727059119	47.27	0.86	47.27	46.934	47.794	0					70	25	5	0	0	0	0.0013458	1	6124	78.326
ETVDQVEELRR	11	Unmodified	_ETVDQVEELRR_					0	0	0	1	E1BDX8	E1BDX8	E1BDX8	MULTI-MSMS	20140904-PurClathDigest-1ug-03	3	458.57	3	458.572162	1372.69466	31186.84	-4.6091	-0.0021136	0.26906	0.00012338	-4.34	-0.0019902	458.572552176041	37.776	0.39975	37.776	37.554	37.954	-3.8147E-06					22	10	4	0	0	0	0.046361	1	3837	47.302
EVAAEETAKPGPDK	14	Unmodified	_EVAAEETAKPGPDK_					0	0	0	1	G3MYP5	G3MYP5	G3MYP5	MULTI-MSMS	20140904-PurClathDigest-1ug-01	1	721.36	2	721.362096	1440.70964	24482.53	-5.6991	-0.0041111	0.05853	4.2221E-05	-5.6406	-0.0040689	721.36212928471	31.305	0.387	31.305	31.109	31.496	0					33	11	4	0	0	0	3.1715E-05	1	2801	135.91
EVAAEETAKPGPDK	14	Unmodified	_EVAAEETAKPGPDK_					0	0	0	1	G3MYP5	G3MYP5	G3MYP5	MULTI-MSMS	20140904-PurClathDigest-1ug-01	1	481.24	3	481.243823	1440.70964	30346.14	-5.9214	-0.0028497	0.81152	0.00039054	-5.1099	-0.0024591	481.244204421475	31.304	0.54575	31.304	31.075	31.621	0					35	16	4	0	0	0	0.059815	1	2805	46.797
EVAAEETAKPGPDK	14	Unmodified	_EVAAEETAKPGPDK_					0	0	0	1	G3MYP5	G3MYP5	G3MYP5	MULTI-MSMS	20140904-PurClathDigest-1ug-02	2	721.36	2	721.362096	1440.70964	24629.91	-4.3845	-0.0031628	-0.14285	-0.00010305	-4.5274	-0.0032659	721.361929657316	31.295	0.40333	31.295	31.084	31.487	0					31	10	4	0	0	0	3.5632E-05	1	2530	151.3
EVAAEETAKPGPDK	14	Unmodified	_EVAAEETAKPGPDK_					0	0	0	1	G3MYP5	G3MYP5	G3MYP5	MULTI-MSMS	20140904-PurClathDigest-1ug-02	2	481.24	3	481.243823	1440.70964	29726.4	-4.2444	-0.0020426	0.23261	0.00011194	-4.0118	-0.0019307	481.243927854278	31.282	0.47517	31.282	30.978	31.453	1.9073E-06					55	12	7	0	0	0	0.01235	1	2531	75.589
EVAAEETAKPGPDK	14	Unmodified	_EVAAEETAKPGPDK_					0	0	0	1	G3MYP5	G3MYP5	G3MYP5	MULTI-MSMS	20140904-PurClathDigest-1ug-03	3	481.24	3	481.243823	1440.70964	30214.89	-4.5906	-0.0022092	0.5337	0.00025684	-4.0569	-0.0019524	481.244095240863	31.336	0.54817	31.336	31.032	31.58	0					48	13	7	0	0	0	0.051943	1	2393	54.09
EVAAEETAKPGPDK	14	Unmodified	_EVAAEETAKPGPDK_					0	0	0	1	G3MYP5	G3MYP5	G3MYP5	MULTI-MSMS	20140904-PurClathDigest-1ug-03	3	721.36	2	721.362096	1440.70964	24781.21	-4.7424	-0.003421	0.16666	0.00012022	-4.5757	-0.0033008	721.362104456512	31.351	0.47308	31.351	31.107	31.58	-1.9073E-06					30	11	4	0	0	0	3.1899E-05	1	2394	145.43
EVAAEETAKPGPDKGALEEEGK	22	Unmodified	_EVAAEETAKPGPDKGALEEEGK_					0	0	0	2	G3MYP5	G3MYP5	G3MYP5	MULTI-MSMS	20140904-PurClathDigest-1ug-01	1	752.7	3	752.372772	2254.09649	24557.78	-5.9529	-0.0044788	-0.68821	-0.00051779	-6.6411	-0.0049966	752.706641149467	33.986	0.52459	33.986	33.786	34.311	0					65	16	6	0	0	0	5.0616E-05	1	3484	126.62
EVAAEETAKPGPDKGALEEEGK	22	Unmodified	_EVAAEETAKPGPDKGALEEEGK_					0	0	0	2	G3MYP5	G3MYP5	G3MYP5	MULTI-MSMS	20140904-PurClathDigest-1ug-01	1	1128.05	2	1128.05552	2254.09649	19720.34	-6.2709	-0.0070739	0.3685	0.00041569	-5.9024	-0.0066582	1128.05529182516	33.973	0.40667	33.973	33.786	34.193	0					43	12	5	0	0	0	3.0684E-08	1	3501	183.63
EVAAEETAKPGPDKGALEEEGK	22	Unmodified	_EVAAEETAKPGPDKGALEEEGK_					0	0	0	2	G3MYP5	G3MYP5	G3MYP5	MULTI-MSMS	20140904-PurClathDigest-1ug-02	2	752.7	3	752.372772	2254.09649	24365.76	-5.5784	-0.004197	-0.83169	-0.00062574	-6.4101	-0.0048228	752.706373264182	34.229	0.56725	34.229	34.024	34.592	0					65	15	6	0	0	0	0.00030796	1	3194	115.54
EVAAEETAKPGPDKGALEEEGK	22	Unmodified	_EVAAEETAKPGPDKGALEEEGK_					0	0	0	2	G3MYP5	G3MYP5	G3MYP5	MULTI-MSMS	20140904-PurClathDigest-1ug-02	2	1128.55	2	1128.05552	2254.09649	19005.87	-5.903	-0.0066589	-0.31731	-0.00035795	-6.2203	-0.0070169	1128.55692822237	34.215	0.36934	34.215	34.06	34.43	0					29	9	4	0	0	0	5.4731E-08	1	3207	161.47
EVAAEETAKPGPDKGALEEEGK	22	Unmodified	_EVAAEETAKPGPDKGALEEEGK_					0	0	0	2	G3MYP5	G3MYP5	G3MYP5	MULTI-MSMS	20140904-PurClathDigest-1ug-03	3	752.7	3	752.372772	2254.09649	24244.64	-6.0793	-0.0045739	-0.28881	-0.00021729	-6.3681	-0.0047912	752.70692660426	34.266	0.63383	34.266	34.05	34.684	0					66	17	6	0	0	0	0.00039683	1	3025	114.19
EVDEQMLAIQSK	12	Oxidation (M)	_EVDEQM(ox)LAIQSK_		EVDEQM(1)LAIQSK		EVDEQM(91.62)LAIQSK	0	0	1	0	Q2T9S0	Q2T9S0	Q2T9S0	MULTI-MSMS	20140904-PurClathDigest-1ug-01	1	703.84	2	703.845224	1405.6759	26171.86	-6.2479	-0.0043976	-0.34478	-0.00024267	-6.5927	-0.0046402	703.844634543001	37.883	0.46967	37.883	37.616	38.086	0					35	14	4	0	0	0	0.012502	1	4498	91.62
EVDEQMLAIQSK	12	Oxidation (M)	_EVDEQM(ox)LAIQSK_		EVDEQM(1)LAIQSK		EVDEQM(92.78)LAIQSK	0	0	1	0	Q2T9S0	Q2T9S0	Q2T9S0	MULTI-MSMS	20140904-PurClathDigest-1ug-03	3	703.84	2	703.845224	1405.6759	25655.45	-6.1838	-0.0043524	-0.67648	-0.00047614	-6.8603	-0.0048286	703.84479165311	38.131	0.68583	38.131	37.778	38.464	0					41	18	4	0	0	0	0.044982	1	3917	92.781
EVDEQMLNVQNK	12	Oxidation (M)	_EVDEQM(ox)LNVQNK_		EVDEQM(1)LNVQNK		EVDEQM(115)LNVQNK	0	0	1	0	Q2KJD0;E1B953;Q3MHM5;E1BJB1;Q6B856	Q2KJD0;Q3MHM5;E1BJB1	Q3MHM5	MULTI-MSMS	20140904-PurClathDigest-1ug-01	1	731.84	2	731.845755	1461.67696	24600.26	-5.9676	-0.0043674	-0.047417	-3.4702E-05	-6.0151	-0.0044021	731.84583448616	35.879	0.85375	35.879	35.609	36.462	0					64	26	3	0	0	0	0.0024725	1	3984	115
EVDEQMLNVQNK	12	Oxidation (M)	_EVDEQM(ox)LNVQNK_		EVDEQM(1)LNVQNK		EVDEQM(128.85)LNVQNK	0	0	1	0	Q2KJD0;E1B953;Q3MHM5;E1BJB1;Q6B856	Q2KJD0;Q3MHM5;E1BJB1	Q3MHM5	MULTI-MSMS	20140904-PurClathDigest-1ug-03	3	731.84	2	731.845755	1461.67696	24608.82	-6.5173	-0.0047697	-0.10705	-7.8345E-05	-6.6244	-0.004848	731.845834692791	35.96	0.94683	35.96	35.639	36.586	0					50	26	3	0	0	0	0.00044248	1	3413	128.85
EVTQLR	6	Unmodified	_EVTQLR_					0	0	0	0	CON__P35527	CON__P35527	CON__P35527	MULTI-MSMS	20140904-PurClathDigest-1ug-01	1	373.21	2	373.213778	744.413003	34223.07	-6.039	-0.0022539	0.27648	0.00010318	-5.7626	-0.0021507	373.213781847014	32.873	0.38392	32.873	32.667	33.051	-3.8147E-06					26	11	3	0	0	0	0.039386	1	3205	85.061
EVVAGSHELGQDYEHVTMLQER	22	Oxidation (M)	_EVVAGSHELGQDYEHVTM(ox)LQER_		EVVAGSHELGQDYEHVTM(1)LQER		EVVAGSHELGQDYEHVTM(119.41)LQER	0	0	1	0	F1MYC9	F1MYC9	F1MYC9	MULTI-MSMS	20140904-PurClathDigest-1ug-02	2	849.06	3	848.399215	2542.17582	23940.73	-4.8725	-0.0041339	1.5693	0.0013314	-3.3033	-0.0028025	848.7351067505	41.408	0.26542	41.408	41.237	41.502	0					28	7	5	0	0	0	6.91E-07	1	4910	119.41
EVVAGSHELGQDYEHVTMLQER	22	Oxidation (M)	_EVVAGSHELGQDYEHVTM(ox)LQER_		EVVAGSHELGQDYEHVTM(1)LQER		EVVAGSHELGQDYEHVTM(141.36)LQER	0	0	1	0	F1MYC9	F1MYC9	F1MYC9	MULTI-MSMS	20140904-PurClathDigest-1ug-03	3	848.73	3	848.399215	2542.17582	23253.31	-5.1118	-0.0043368	1.0441	0.00088579	-4.0677	-0.003451	848.734552721961	41.374	0.30067	41.374	41.201	41.502	0					31	8	5	0	0	0	9.9076E-14	1	4670	141.36
EVVPDVPEER	10	Unmodified	_EVVPDVPEER_					0	0	0	0	F1N3M8;G3MYP5	F1N3M8;G3MYP5	G3MYP5	MULTI-MSMS	20140904-PurClathDigest-1ug-01	1	584.79	2	584.79586	1167.57717	27852.45	-5.382	-0.0031474	1.1101	0.0006492	-4.2718	-0.0024982	584.796057391776	38.74	0.42442	38.74	38.578	39.002	0					36	13	4	0	0	0	0.00016172	1	4710	145.25
EVVPDVPEER	10	Unmodified	_EVVPDVPEER_					0	0	0	0	F1N3M8;G3MYP5	F1N3M8;G3MYP5	G3MYP5	MULTI-MSMS	20140904-PurClathDigest-1ug-02	2	584.79	2	584.79586	1167.57717	27779.61	-4.3759	-0.002559	0.76104	0.00044505	-3.6149	-0.002114	584.796118599105	39.047	0.39342	39.047	38.862	39.255	0					34	11	4	0	0	0	0.00065655	1	4325	117.52
EVVPDVPEER	10	Unmodified	_EVVPDVPEER_					0	0	0	0	F1N3M8;G3MYP5	F1N3M8;G3MYP5	G3MYP5	MULTI-MSMS	20140904-PurClathDigest-1ug-03	3	584.79	2	584.79586	1167.57717	28193.68	-4.4228	-0.0025864	0.34282	0.00020048	-4.08	-0.002386	584.795908399105	39.159	0.37025	39.159	38.974	39.344	-3.8147E-06					28	10	4	0	0	0	0.00031516	1	4128	128.81
EWYQETHEK	9	Unmodified	_EWYQETHEK_					0	0	0	0	F1N1S2	F1N1S2	F1N1S2	MULTI-MSMS	20140904-PurClathDigest-1ug-01	1	625.27	2	625.277835	1248.54112	26090.72	-6.7541	-0.0042232	0.46738	0.00029224	-6.2867	-0.0039309	625.278282750607	35.307	0.37534	35.307	35.161	35.537	0					34	11	4	0	0	0	0.0055266	1	3830	101.65
EWYQETHEK	9	Unmodified	_EWYQETHEK_					0	0	0	0	F1N1S2	F1N1S2	F1N1S2	MULTI-MSMS	20140904-PurClathDigest-1ug-02	2	625.28	2	625.277835	1248.54112	26180.62	-6.4973	-0.0040626	-0.17444	-0.00010907	-6.6718	-0.0041717	625.277703393182	35.784	0.38958	35.784	35.594	35.983	-3.8147E-06					33	11	4	0	0	0	0.0027715	1	3566	109.66
EWYQETHEK	9	Unmodified	_EWYQETHEK_					0	0	0	0	F1N1S2	F1N1S2	F1N1S2	MULTI-MSMS	20140904-PurClathDigest-1ug-03	3	625.27	2	625.277835	1248.54112	26155.39	-7.1219	-0.0044532	0.92422	0.0005779	-6.1977	-0.0038753	625.278509286271	35.658	0.37175	35.658	35.51	35.882	0					35	10	4	0	0	0	0.00049404	1	3363	143.03
EYQDLLNVK	9	Unmodified	_EYQDLLNVK_					0	0	0	0	F1MSQ6;O62654;P02548;F1MDZ2;O77788;Q08DH7	F1MSQ6;P02548;F1MDZ2;Q08DH7	F1MDZ2	MULTI-MSMS	20140904-PurClathDigest-1ug-01	1	561.29	2	561.295496	1120.57644	28438.83	-5.0284	-0.0028224	-0.67901	-0.00038112	-5.7074	-0.0032036	561.295187618156	43.385	1.0414	43.385	43.252	44.293	0					100	34	5	0	0	0	0.038542	1	5928	76.679
EYQDLLNVK	9	Unmodified	_EYQDLLNVK_					0	0	0	0	F1MSQ6;O62654;P02548;F1MDZ2;O77788;Q08DH7	F1MSQ6;P02548;F1MDZ2;Q08DH7	F1MDZ2	MULTI-MSMS	20140904-PurClathDigest-1ug-02	2	561.29	2	561.295496	1120.57644	28492.22	-4.5453	-0.0025512	-0.588	-0.00033004	-5.1333	-0.0028813	561.295207574083	43.766	1.2077	43.766	43.608	44.815	3.8147E-06					94	37	5	0	0	0	0.0045448	2	5492	107.57
EYQDLLNVK	9	Unmodified	_EYQDLLNVK_					0	0	0	0	F1MSQ6;O62654;P02548;F1MDZ2;O77788;Q08DH7	F1MSQ6;P02548;F1MDZ2;Q08DH7	F1MDZ2	MULTI-MSMS	20140904-PurClathDigest-1ug-03	3	561.29	2	561.295496	1120.57644	28300.83	-4.8093	-0.0026994	-0.72931	-0.00040936	-5.5386	-0.0031088	561.295142033054	43.878	1.1903	43.878	43.709	44.9	0					100	36	5	0	0	0	0.021511	1	5267	85.676
EYQTQLIQR	9	Unmodified	_EYQTQLIQR_					0	0	0	0	E1BDX8	E1BDX8	E1BDX8	MULTI-MSMS	20140904-PurClathDigest-1ug-01	1	589.81	2	589.811845	1177.60914	21652.21	-5.2105	-0.0030732	1.593	0.00093955	-3.6176	-0.0021337	589.81164958928	38.397	0.34058	38.397	38.207	38.548	-3.8147E-06					27	10	4	0	0	0	0.0004883	1	4621	131.06
EYQTQLIQR	9	Unmodified	_EYQTQLIQR_					0	0	0	0	E1BDX8	E1BDX8	E1BDX8	MULTI-MSMS	20140904-PurClathDigest-1ug-02	2	589.81	2	589.811845	1177.60914	26490.12	-5.2826	-0.0031157	0.48099	0.00028369	-4.8016	-0.002832	589.811749566069	38.608	0.37842	38.608	38.375	38.754	0					25	10	4	0	0	0	0.00048129	1	4235	138.4
EYQTQLIQR	9	Unmodified	_EYQTQLIQR_					0	0	0	0	E1BDX8	E1BDX8	E1BDX8	MULTI-MSMS	20140904-PurClathDigest-1ug-03	3	589.81	2	589.811845	1177.60914	27291.79	-4.704	-0.0027745	0.91943	0.00054229	-3.7846	-0.0022322	589.81178453882	38.763	0.43692	38.763	38.537	38.974	0					27	11	4	0	0	0	0.00042453	1	4058	149.82
FAALEQPEVER	11	Unmodified	_FAALEQPEVER_					0	0	0	0	F1MEW3	F1MEW3	F1MEW3	MULTI-MSMS	20140904-PurClathDigest-1ug-01	1	644.83	2	644.830234	1287.64592	26739.23	-6.232	-0.0040186	0.78288	0.00050483	-5.4491	-0.0035138	644.830768340728	40.73	0.74375	40.73	40.497	41.24	0					69	23	5	0	0	0	0.00012239	2	5227	133.05
FAALEQPEVER	11	Unmodified	_FAALEQPEVER_					0	0	0	0	F1MEW3	F1MEW3	F1MEW3	MULTI-MSMS	20140904-PurClathDigest-1ug-02	2	644.83	2	644.830234	1287.64592	26675.41	-5.4432	-0.00351	-0.59631	-0.00038452	-6.0395	-0.0038945	644.829831138191	41.15	0.67058	41.15	40.899	41.569	0					63	20	5	0	0	0	3.7472E-05	1	4831	140.24
FAALEQPEVER	11	Unmodified	_FAALEQPEVER_					0	0	0	0	F1MEW3	F1MEW3	F1MEW3	MULTI-MSMS	20140904-PurClathDigest-1ug-03	3	644.83	2	644.830234	1287.64592	26656.97	-5.6279	-0.003629	-0.023341	-1.5051E-05	-5.6512	-0.0036441	644.830234013501	41.158	0.71217	41.158	40.921	41.633	0					55	21	3	0	0	0	7.9327E-05	2	4597	136.7
FADLNDAAAR	10	Unmodified	_FADLNDAAAR_					0	0	0	0	Q28115	Q28115	Q28115	MULTI-MSMS	20140904-PurClathDigest-1ug-01	1	532.26	2	532.261988	1062.50942	28917.78	-5.519	-0.0029376	0.35922	0.0001912	-5.1598	-0.0027464	532.262208500004	38.541	0.45267	38.541	38.331	38.784	3.8147E-06					45	14	5	0	0	0	9.9197E-05	1	4641	163.16
FADLNDAAAR	10	Unmodified	_FADLNDAAAR_					0	0	0	0	Q28115	Q28115	Q28115	MULTI-SECPEP	20140904-PurClathDigest-1ug-01	1	1063.98	1	1063.5167	1062.50942	20243.79	-5.7741	-0.0061409	1.3163	0.0013999	-4.4578	-0.0047409	1063.51813803834	38.518	0.2155	38.518	38.362	38.578	-3.8147E-06					16	6	4	0	0	0	0.0032934	1	4674	109.02
FADLNDAAAR	10	Unmodified	_FADLNDAAAR_					0	0	0	0	Q28115	Q28115	Q28115	MULTI-MSMS	20140904-PurClathDigest-1ug-02	2	532.26	2	532.261988	1062.50942	29109	-5.2256	-0.0027814	0.38413	0.00020446	-4.8415	-0.002577	532.262271199337	38.766	0.64841	38.766	38.544	39.193	0					54	18	5	0	0	0	0.0021299	1	4250	115.82
FADLNDAAAR	10	Unmodified	_FADLNDAAAR_					0	0	0	0	Q28115	Q28115	Q28115	MULTI-MSMS	20140904-PurClathDigest-1ug-03	3	532.26	2	532.261988	1062.50942	28885.01	-4.8448	-0.0025787	0.71263	0.0003793	-4.1322	-0.0021994	532.262390627067	38.922	0.63417	38.922	38.71	39.344	0					49	17	5	0	0	0	0.0003226	1	4072	130.53
FAGYIDK	7	Unmodified	_FAGYIDK_					0	0	0	0	F1MSQ6	F1MSQ6	F1MSQ6	MULTI-MSMS	20140904-PurClathDigest-1ug-01	1	407.21	2	407.210704	812.406855	31926.12	-6.0707	-0.0024721	-0.044466	-1.8107E-05	-6.1152	-0.0024902	407.210559411921	37.75	0.34984	37.75	37.616	37.966	0					32	10	5	0	0	0	0.026005	1	4456	90.777
FAGYIDK	7	Unmodified	_FAGYIDK_					0	0	0	0	F1MSQ6	F1MSQ6	F1MSQ6	MULTI-MSMS	20140904-PurClathDigest-1ug-03	3	407.21	2	407.210704	812.406855	32722.85	-5.898	-0.0024017	-0.099051	-4.0335E-05	-5.9971	-0.0024421	407.210591586465	38.101	0.44592	38.101	37.954	38.4	0					29	11	4	0	0	0	0.026005	1	3898	90.777
FAGYIDKVR	9	Unmodified	_FAGYIDKVR_					0	0	0	1	F1MSQ6	F1MSQ6	F1MSQ6	MULTI-MSMS	20140904-PurClathDigest-1ug-01	1	534.79	2	534.795466	1067.57638	28875.49	-6.4468	-0.0034477	0.14037	7.507E-05	-6.3064	-0.0033727	534.795555542119	37.99	0.31267	37.99	37.835	38.148	0					27	9	4	0	0	0	0.00020476	1	4524	169.09
FAGYIDKVR	9	Unmodified	_FAGYIDKVR_					0	0	0	1	F1MSQ6	F1MSQ6	F1MSQ6	MULTI-MSMS	20140904-PurClathDigest-1ug-02	2	534.79	2	534.795466	1067.57638	28440.38	-6.6895	-0.0035775	0.6512	0.00034826	-6.0383	-0.0032293	534.795852384192	38.258	0.3255	38.258	38.116	38.441	0					26	9	5	0	0	0	0.00014263	1	4148	182.53
FAGYIDKVR	9	Unmodified	_FAGYIDKVR_					0	0	0	1	F1MSQ6	F1MSQ6	F1MSQ6	MULTI-MSMS	20140904-PurClathDigest-1ug-03	3	534.79	2	534.795466	1067.57638	28467.48	-6.2881	-0.0033629	0.29381	0.00015713	-5.9943	-0.0032057	534.795613574684	38.451	0.6345	38.451	38.3	38.935	0					32	17	4	0	0	0	0.00020907	1	3987	158.61
FAGYIEK	7	Unmodified	_FAGYIEK_					0	0	0	0	F1MDZ2;O77788	F1MDZ2	F1MDZ2	MULTI-MSMS	20140904-PurClathDigest-1ug-01	1	414.22	2	414.218529	826.422505	32746.54	-5.9096	-0.0024479	-0.31687	-0.00013126	-6.2264	-0.0025791	414.218383539454	37.728	0.96134	37.728	37.587	38.548	0					46	30	4	0	0	0	0.027752	1	4442	89.55
FAGYIEK	7	Unmodified	_FAGYIEK_					0	0	0	0	F1MDZ2;O77788	F1MDZ2	F1MDZ2	MULTI-MSMS	20140904-PurClathDigest-1ug-02	2	414.22	2	414.218529	826.422505	32323.25	-5.4406	-0.0022536	-0.24753	-0.00010253	-5.6881	-0.0023561	414.218404423073	38.016	0.46475	38.016	37.878	38.342	3.8147E-06					33	13	4	0	0	0	0.027752	1	4083	89.55
FAGYIEK	7	Unmodified	_FAGYIEK_					0	0	0	0	F1MDZ2;O77788	F1MDZ2	F1MDZ2	MULTI-MSMS	20140904-PurClathDigest-1ug-03	3	414.22	2	414.218529	826.422505	32903.15	-5.7996	-0.0024023	-0.19409	-8.0397E-05	-5.9937	-0.0024827	414.218387281364	38.092	0.54767	38.092	37.916	38.464	0					38	14	5	0	0	0	0.027752	1	3897	89.55
FANLNEQAAR	10	Unmodified	_FANLNEQAAR_					0	0	0	0	Q08DH7	Q08DH7	Q08DH7	MULTI-MSMS	20140904-PurClathDigest-1ug-01	1	567.29	2	567.288537	1132.56252	27653.82	-5.7018	-0.0032346	0.93795	0.00053209	-4.7639	-0.0027025	567.28916818167	36.89	1.0656	36.89	36.462	37.528	0					110	33	5	0	0	0	7.9153E-05	2	4256	166.66
FANLNEQAAR	10	Unmodified	_FANLNEQAAR_					0	0	0	0	Q08DH7	Q08DH7	Q08DH7	MULTI-MSMS	20140904-PurClathDigest-1ug-02	2	567.29	2	567.288537	1132.56252	27283.11	-4.9976	-0.0028351	0.33622	0.00019074	-4.6614	-0.0026443	567.288814119588	37.091	1.0028	37.091	36.699	37.701	0					90	28	5	0	0	0	2.9102E-05	2	3846	185.81
FANLNEQAAR	10	Unmodified	_FANLNEQAAR_					0	0	0	0	Q08DH7	Q08DH7	Q08DH7	MULTI-MSMS	20140904-PurClathDigest-1ug-03	3	567.29	2	567.288537	1132.56252	27121.98	-5.4696	-0.0031028	0.26005	0.00014752	-5.2095	-0.0029553	567.288769508261	37.097	1.1558	37.097	36.657	37.812	0					99	30	5	0	0	0	0.00011269	2	3654	157.99
FANLNEQAAR	10	Deamidation (NQ)	_FANLN(de)EQAAR_	FAN(0.092)LN(0.907)EQ(0.001)AAR		FAN(-9.95)LN(9.95)EQ(-30.87)AAR		0	1	0	0	Q08DH7	Q08DH7	Q08DH7	MULTI-MSMS	20140904-PurClathDigest-1ug-01	1	567.78	2	567.780544	1133.54654	28703.13	-6.109	-0.0034686	0.27366	0.00015538	-5.8354	-0.0033132	567.780683542505	37.647	0.53175	37.647	37.405	37.936	0					38	16	4	0	0	0	0.0050249	1	4427	131.45
FANLNEQAAR	10	Deamidation (NQ)	_FANLN(de)EQAAR_	FAN(0.141)LN(0.859)EQAAR		FAN(-7.84)LN(7.84)EQ(-58.11)AAR		0	1	0	0	Q08DH7	Q08DH7	Q08DH7	MULTI-MSMS	20140904-PurClathDigest-1ug-02	2	567.78	2	567.780544	1133.54654	28866.35	-4.9365	-0.0028028	-0.26782	-0.00015206	-5.2043	-0.0029549	567.780413470681	37.873	0.48191	37.873	37.634	38.116	3.8147E-06					35	13	4	0	0	0	0.00061721	1	4040	170.47
FANLNEQAAR	10	Deamidation (NQ)	_FANLN(de)EQAAR_	FAN(0.048)LN(0.952)EQAAR		FAN(-12.99)LN(12.99)EQ(-62.97)AAR		0	1	0	0	Q08DH7	Q08DH7	Q08DH7	MULTI-MSMS	20140904-PurClathDigest-1ug-03	3	567.78	2	567.780544	1133.54654	28946.05	-5.3109	-0.0030154	0.40428	0.00022954	-4.9067	-0.0027859	567.780680986413	37.952	0.52325	37.952	37.739	38.262	0					40	13	4	0	0	0	0.00037172	1	3861	182.65
FAQEAEAAR	9	Unmodified	_FAQEAEAAR_					0	0	0	0	F1MSQ6	F1MSQ6	F1MSQ6	MULTI-MSMS	20140904-PurClathDigest-1ug-01	1	496.74	2	496.743431	991.472308	30020.27	-6.5162	-0.0032369	-0.13347	-6.6299E-05	-6.6497	-0.0033032	496.743445819701	32.761	0.755	32.761	32.546	33.301	0					50	23	4	0	0	0	0.00030262	1	3161	164.71
FAQEAEAAR	9	Unmodified	_FAQEAEAAR_					0	0	0	0	F1MSQ6	F1MSQ6	F1MSQ6	MULTI-MSMS	20140904-PurClathDigest-1ug-02	2	496.74	2	496.743431	991.472308	29542.57	-6.3741	-0.0031663	-0.70535	-0.00035038	-7.0794	-0.0035167	496.743106771108	32.853	0.88558	32.853	32.603	33.489	0					57	24	5	0	0	0	0.00047972	1	2883	144.5
FAQEAEAAR	9	Unmodified	_FAQEAEAAR_					0	0	0	0	F1MSQ6	F1MSQ6	F1MSQ6	MULTI-MSMS	20140904-PurClathDigest-1ug-03	3	496.74	2	496.743431	991.472308	29965.72	-6.3075	-0.0031332	-1.3518	-0.00067152	-7.6593	-0.0038047	496.742775737723	32.92	0.89226	32.92	32.718	33.61	0					51	23	5	0	0	0	0.00041537	1	2729	155.07
FASFIDK	7	Unmodified	_FASFIDK_					0	0	0	0	CON__P35908;CON__Q9R0H5;CON__Q6NXH9;G3MYU2;CON__Q7Z794	CON__P35908	CON__P35908	MULTI-MSMS	20140904-PurClathDigest-1ug-01	1	414.22	2	414.218529	826.422505	32654.45	-5.1366	-0.0021277	-0.33689	-0.00013955	-5.4735	-0.0022672	414.218197458322	41.833	0.52208	41.833	41.599	42.122	0					33	16	4	0	0	0	0.0058548	1	5510	128.57
FASFIDK	7	Unmodified	_FASFIDK_					0	0	0	0	CON__P35908;CON__Q9R0H5;CON__Q6NXH9;G3MYU2;CON__Q7Z794	CON__P35908	CON__P35908	MULTI-MSMS	20140904-PurClathDigest-1ug-02	2	414.22	2	414.218529	826.422505	33226.5	-4.7855	-0.0019823	-0.095938	-3.9739E-05	-4.8815	-0.002022	414.218372046106	42.174	0.50558	42.174	41.995	42.5	0					27	15	3	0	0	0	0.0072568	1	5109	117.16
FASFIDK	7	Unmodified	_FASFIDK_					0	0	0	0	CON__P35908;CON__Q9R0H5;CON__Q6NXH9;G3MYU2;CON__Q7Z794	CON__P35908	CON__P35908	MULTI-MSMS	20140904-PurClathDigest-1ug-03	3	414.22	2	414.218529	826.422505	33235.06	-5.8446	-0.0024209	0.12544	5.1958E-05	-5.7191	-0.002369	414.218560824143	42.185	0.54409	42.185	41.861	42.405	0					25	15	3	0	0	0	0.0072568	1	4868	117.16
FASFIDKVR	9	Unmodified	_FASFIDKVR_					0	0	0	1	CON__P35908;CON__Q9R0H5;CON__Q6NXH9;G3MYU2;CON__Q7Z794	CON__P35908	CON__P35908	MULTI-MSMS	20140904-PurClathDigest-1ug-03	3	361.54	3	361.537953	1081.59203	35161.76	-5.3424	-0.0019315	-0.26957	-9.7461E-05	-5.6119	-0.0020289	361.537882352111	41.797	0.26534	41.797	41.665	41.931	0					17	7	3	0	0	0	0.00011183	1	4782	170.24
FASFIER	7	Unmodified	_FASFIER_					0	0	0	0	P02548	P02548	P02548	MULTI-MSMS	20140904-PurClathDigest-1ug-01	1	435.23	2	435.229428	868.444303	31625.46	-5.8121	-0.0025296	0.58721	0.00025557	-5.2249	-0.002274	435.229681024762	42.411	0.98467	42.411	42.209	43.194	0					70	32	5	0	0	0	0.0051159	2	5653	134.06
FASFIER	7	Unmodified	_FASFIER_					0	0	0	0	P02548	P02548	P02548	MULTI-MSMS	20140904-PurClathDigest-1ug-02	2	435.23	2	435.229428	868.444303	32397.52	-5.2931	-0.0023037	0.15045	6.5479E-05	-5.1427	-0.0022382	435.229468195464	42.809	0.56642	42.809	42.631	43.198	0					52	17	4	0	0	0	0.0040986	1	5250	143
FASFIER	7	Unmodified	_FASFIER_					0	0	0	0	P02548	P02548	P02548	MULTI-MSMS	20140904-PurClathDigest-1ug-03	3	435.23	2	435.229428	868.444303	32148.36	-5.7073	-0.002484	-0.26427	-0.00011502	-5.9716	-0.002599	435.229269081096	42.873	0.75284	42.873	42.665	43.418	0					60	22	5	0	0	0	0.0071307	1	5019	117.16
FASYIEK	7	Unmodified	_FASYIEK_					0	0	0	0	Q28115	Q28115	Q28115	MULTI-MSMS	20140904-PurClathDigest-1ug-01	1	429.22	2	429.223811	856.433069	32224.52	-6.4379	-0.0027633	-0.26533	-0.00011389	-6.7033	-0.0028772	429.223651175151	38.143	0.87842	38.143	37.905	38.784	3.8147E-06					55	28	3	0	0	0	0.030708	1	4601	87.323
FASYIEK	7	Unmodified	_FASYIEK_					0	0	0	0	Q28115	Q28115	Q28115	MULTI-MSMS	20140904-PurClathDigest-1ug-02	2	429.22	2	429.223811	856.433069	32150.75	-6.4668	-0.0027757	0.29886	0.00012828	-6.1679	-0.0026474	429.223616472465	38.4	0.97558	38.4	38.184	39.16	0					93	28	5	0	0	0	0.030708	1	4164	87.323
FASYIEK	7	Unmodified	_FASYIEK_					0	0	0	0	Q28115	Q28115	Q28115	MULTI-MSMS	20140904-PurClathDigest-1ug-03	3	429.22	2	429.223811	856.433069	32224.21	-6.2339	-0.0026757	-0.43058	-0.00018481	-6.6645	-0.0028605	429.223588311604	38.571	0.91075	38.571	38.336	39.247	0					58	25	3	0	0	0	0.030708	2	3984	87.323
FAVFIEK	7	Unmodified	_FAVFIEK_					0	0	0	0	Q08DH7	Q08DH7	Q08DH7	MULTI-SECPEP	20140904-PurClathDigest-1ug-02	2	854.09	1	853.481817	852.47454	22556.91	-4.6164	-0.00394	-1.1207	-0.00095647	-5.737	-0.0048965	853.481033208962	45.001	0.35717	45.001	44.846	45.203	-3.8147E-06					24	10	3	0	0	0	0.0054552	1	5829	94.262
FAVFIEK	7	Unmodified	_FAVFIEK_					0	0	0	0	Q08DH7	Q08DH7	Q08DH7	MULTI-SECPEP	20140904-PurClathDigest-1ug-03	3	854.09	1	853.481817	852.47454	23027.47	-4.5855	-0.0039136	-1.0222	-0.0008724	-5.6076	-0.004786	853.481030006085	45.077	0.32166	45.077	44.93	45.252	0					22	9	3	0	0	0	0.014099	1	5586	81.297
FDVNTSAVQVLIEHIGNLDR	20	Unmodified	_FDVNTSAVQVLIEHIGNLDR_					0	0	0	0	P49951;F1MPU0	P49951	P49951	MULTI-MSMS	20140904-PurClathDigest-1ug-01	1	747.73	3	747.393842	2239.1597	24353.82	-2.4917	-0.0018623	0.18618	0.00013915	-2.3055	-0.0017231	747.728378051032	57.283	1.0053	57.283	56.962	57.967	3.8147E-06					113	21	8	0	0	0	5.2824E-06	2	9472	107.78
FDVNTSAVQVLIEHIGNLDR	20	Unmodified	_FDVNTSAVQVLIEHIGNLDR_					0	0	0	0	P49951;F1MPU0	P49951	P49951	MULTI-MSMS	20140904-PurClathDigest-1ug-01	1	1121.08	2	1120.58712	2239.1597	19911.31	-2.6978	-0.0030231	-0.63317	-0.00070952	-3.331	-0.0037327	1121.08778795003	57.277	0.65366	57.277	57.006	57.66	0					52	13	6	0	0	0	1.4762E-27	1	9416	245.61
FDVNTSAVQVLIEHIGNLDR	20	Unmodified	_FDVNTSAVQVLIEHIGNLDR_					0	0	0	0	P49951;F1MPU0	P49951	P49951	MULTI-MSMS	20140904-PurClathDigest-1ug-02	2	1121.09	2	1120.58712	2239.1597	20007.38	-1.7444	-0.0019548	-2.0226	-0.0022665	-3.7671	-0.0042213	1121.08624514107	57.383	0.71017	57.383	57.116	57.826	-3.8147E-06					48	12	6	0	0	0	1.1253E-34	1	8658	270.08
FDVNTSAVQVLIEHIGNLDR	20	Unmodified	_FDVNTSAVQVLIEHIGNLDR_					0	0	0	0	P49951;F1MPU0	P49951	P49951	MULTI-MSMS	20140904-PurClathDigest-1ug-02	2	747.73	3	747.393842	2239.1597	24234.9	-1.3566	-0.0010139	-1.5856	-0.0011851	-2.9422	-0.002199	747.727018054117	57.385	0.81125	57.385	57.116	57.927	-3.8147E-06					68	14	7	0	0	0	2.05E-13	1	8666	165.3
FDVNTSAVQVLIEHIGNLDR	20	Unmodified	_FDVNTSAVQVLIEHIGNLDR_					0	0	0	0	P49951;F1MPU0	P49951	P49951	MULTI-MSMS	20140904-PurClathDigest-1ug-03	3	1121.08	2	1120.58712	2239.1597	20079.6	-2.3263	-0.0026068	-0.63971	-0.00071685	-2.966	-0.0033237	1121.08755116528	57.389	0.67775	57.389	57.188	57.866	0					34	10	6	0	0	0	1.2031E-43	1	8352	299.43
FDVNTSAVQVLIEHIGNLDR	20	Unmodified	_FDVNTSAVQVLIEHIGNLDR_					0	0	0	0	P49951;F1MPU0	P49951	P49951	MULTI-MSMS	20140904-PurClathDigest-1ug-03	3	747.73	3	747.393842	2239.1597	24303.93	-2.096	-0.0015665	0.17318	0.00012943	-1.9228	-0.0014371	747.72828413726	57.399	0.74142	57.399	57.188	57.929	-3.8147E-06					63	11	8	0	0	0	9.6331E-09	1	8368	131.67
FEEEAR	6	Unmodified	_FEEEAR_					0	0	0	0	F1MDZ2;O77788	F1MDZ2	F1MDZ2	MULTI-MSMS	20140904-PurClathDigest-1ug-02	2	390.68	2	390.679768	779.344983	33826.23	-7.0694	-0.0027619	2.2059	0.0008618	-4.8635	-0.0019001	390.680575162742	32.022	0.38675	32.022	31.867	32.254	0					26	10	4	0	0	0	0.0093401	1	2693	138.38
FEEEAR	6	Unmodified	_FEEEAR_					0	0	0	0	F1MDZ2;O77788	F1MDZ2	F1MDZ2	MULTI-MSMS	20140904-PurClathDigest-1ug-03	3	390.68	2	390.679768	779.344983	33006.92	-7.1953	-0.002811	1.6755	0.00065459	-5.5197	-0.0021565	390.680426789449	32.1	0.77725	32.1	31.907	32.684	0					31	20	3	0	0	0	0.011562	1	2548	116
FEELNADLFR	10	Unmodified	_FEELNADLFR_					0	0	0	0	P19120	P19120	P19120	MULTI-MSMS	20140904-PurClathDigest-1ug-01	1	627.3	2	627.311677	1252.6088	23281.55	-2.8906	-0.0018133	3.5762	0.0022434	0.68553	0.00043004	627.314575213676	48.681	0.39208	48.681	48.515	48.907	0					30	12	4	0	0	0	0.00024998	1	7349	128.35
FEELNADLFR	10	Unmodified	_FEELNADLFR_					0	0	0	0	P19120	P19120	P19120	MULTI-MSMS	20140904-PurClathDigest-1ug-02	2	627.31	2	627.311677	1252.6088	23372.46	-2.7782	-0.0017428	3.2903	0.002064	0.5121	0.00032125	627.314313579138	48.994	0.26075	48.994	48.859	49.12	0					23	7	4	0	0	0	0.00024998	1	6837	133.75
FESLEPEMNNQASR	14	Oxidation (M)	_FESLEPEM(ox)NNQASR_		FESLEPEM(1)NNQASR		FESLEPEM(69.05)NNQASR	0	0	1	0	F1MYC9	F1MYC9	F1MYC9	MULTI-MSMS	20140904-PurClathDigest-1ug-01	1	834.36	2	834.370126	1666.7257	22960.21	-5.88	-0.0049061	-0.4266	-0.00035594	-6.3067	-0.0052621	834.37020051463	38.271	0.49309	38.271	38.055	38.548	0					50	15	5	0	0	0	0.050268	1	4589	69.045
FESLEPEMNNQASR	14	Oxidation (M)	_FESLEPEM(ox)NNQASR_		FESLEPEM(1)NNQASR		FESLEPEM(65.04)NNQASR	0	0	1	0	F1MYC9	F1MYC9	F1MYC9	MULTI-MSMS	20140904-PurClathDigest-1ug-02	2	834.87	2	834.370126	1666.7257	22836.13	-5.9455	-0.0049608	-0.88064	-0.00073478	-6.8262	-0.0056955	834.369649644659	38.481	0.54783	38.481	38.246	38.794	0					51	15	5	0	0	0	0.02844	1	4199	65.038
FESLEPEMNNQASR	14	Oxidation (M)	_FESLEPEM(ox)NNQASR_		FESLEPEM(1)NNQASR		FESLEPEM(148.52)NNQASR	0	0	1	0	F1MYC9	F1MYC9	F1MYC9	MULTI-MSMS	20140904-PurClathDigest-1ug-03	3	834.36	2	834.370126	1666.7257	22946.66	-5.6763	-0.0047361	-0.87666	-0.00073146	-6.5529	-0.0054676	834.3695179992	38.635	0.605	38.635	38.369	38.974	0					51	16	5	0	0	0	3.4637E-07	1	4013	148.52
FGDPVVQSDMK	11	Oxidation (M)	_FGDPVVQSDM(ox)K_		FGDPVVQSDM(1)K		FGDPVVQSDM(90.43)K	0	0	1	0	Q27975;Q27965	Q27975	Q27975	MULTI-MSMS	20140904-PurClathDigest-1ug-01	1	619.79	2	619.789721	1237.56489	26265.61	-5.3292	-0.003303	-1.2949	-0.00080255	-6.624	-0.0041055	619.789323121504	37.396	0.30742	37.396	37.221	37.528	0					22	9	3	0	0	0	0.05368	1	4380	90.434
FGDPVVQSDMK	11	Oxidation (M)	_FGDPVVQSDM(ox)K_		FGDPVVQSDM(1)K		FGDPVVQSDM(81.68)K	0	0	1	0	Q27975;Q27965	Q27975	Q27975	MSMS	20140904-PurClathDigest-1ug-02	2	619.79	2	619.789721	1237.56489	NaN	NaN	NaN	NaN	NaN	NaN	NaN	NaN	37.6	1	37.6	37.1	38.1	-3.8147E-06								0	0	0	0.0087749	1	3998	81.676
FGNPLLVQDVESYDPVLNPVLNR	23	Unmodified	_FGNPLLVQDVESYDPVLNPVLNR_					0	0	0	0	E1BDX8	E1BDX8	E1BDX8	MULTI-MSMS	20140904-PurClathDigest-1ug-01	1	1300.18	2	1299.68175	2597.34895	18472.59	-2.0984	-0.0027273	0.45798	0.00059523	-1.6405	-0.0021321	1300.18406361158	55.917	0.5595	55.917	55.642	56.202	-3.8147E-06					58	14	5	0	0	0	0.0064157	1	9171	56.882
FGNPLLVQDVESYDPVLNPVLNR	23	Unmodified	_FGNPLLVQDVESYDPVLNPVLNR_					0	0	0	0	E1BDX8	E1BDX8	E1BDX8	MULTI-MSMS	20140904-PurClathDigest-1ug-02	2	1300.18	2	1299.68175	2597.34895	18814.34	-2.2442	-0.0029168	0.90957	0.0011821	-1.3347	-0.0017347	1300.18373091478	56.258	0.66025	56.258	55.991	56.651	3.8147E-06					47	14	5	0	0	0	0.0047672	1	8498	63.869
FGNPLLVQDVESYDPVLNPVLNR	23	Unmodified	_FGNPLLVQDVESYDPVLNPVLNR_					0	0	0	0	E1BDX8	E1BDX8	E1BDX8	MULTI-MSMS	20140904-PurClathDigest-1ug-03	3	1300.18	2	1299.68175	2597.34895	18453.92	-1.6324	-0.0021216	-0.25445	-0.0003307	-1.8869	-0.0024523	1300.18264602854	56.21	0.48525	56.21	56.026	56.512	0					32	8	6	0	0	0	0.0035357	1	8203	69.765
FGQMLGSNMTEFHSQISK	18	2 Oxidation (M)	_FGQM(ox)LGSNM(ox)TEFHSQISK_		FGQM(1)LGSNM(1)TEFHSQISK		FGQM(54.71)LGSNM(54.71)TEFHSQISK	0	0	2	0	E1BDX8	E1BDX8	E1BDX8	MULTI-MSMS	20140904-PurClathDigest-1ug-01	1	691.98	3	691.983797	2072.92956	25641.89	-5.2215	-0.0036132	-2.0122	-0.0013924	-7.2337	-0.0050056	692.316352338423	39.133	0.36533	39.133	38.971	39.337	0					38	11	5	0	0	0	0.022296	1	4811	54.708
FGQMLGSNMTEFHSQISK	18	2 Oxidation (M)	_FGQM(ox)LGSNM(ox)TEFHSQISK_		FGQM(1)LGSNM(1)TEFHSQISK		FGQM(51.54)LGSNM(51.54)TEFHSQISK	0	0	2	0	E1BDX8	E1BDX8	E1BDX8	MULTI-MSMS	20140904-PurClathDigest-1ug-02	2	691.98	3	691.983797	2072.92956	25681.86	-5.3147	-0.0036777	-1.9734	-0.0013656	-7.2881	-0.0050432	692.316462629808	39.499	0.39875	39.499	39.288	39.686	0					41	11	5	0	0	0	0.02729	1	4462	51.535
FGQMLGSNMTEFHSQISK	18	2 Oxidation (M)	_FGQM(ox)LGSNM(ox)TEFHSQISK_		FGQM(1)LGSNM(1)TEFHSQISK		FGQM(94.57)LGSNM(94.57)TEFHSQISK	0	0	2	0	E1BDX8	E1BDX8	E1BDX8	MULTI-MSMS	20140904-PurClathDigest-1ug-03	3	692.31	3	691.983797	2072.92956	25917.38	-5.8684	-0.0040608	-2.0211	-0.0013985	-7.8894	-0.0054594	692.316635193371	39.594	0.47108	39.594	39.313	39.784	0					49	13	6	0	0	0	0.00022095	1	4245	94.569
FILKPAIK	8	Unmodified	_FILKPAIK_					0	0	0	1	F1MEW3	F1MEW3	F1MEW3	MULTI-MSMS	20140904-PurClathDigest-1ug-01	1	310.54	3	310.544268	928.610974	37495.05	-5.0229	-0.0015598	-0.1854	-5.7576E-05	-5.2083	-0.0016174	310.544183986898	39.733	0.48508	39.733	39.549	40.034	-3.8147E-06					42	15	4	0	0	0	0.053007	1	4972	62.659
FILKPAIK	8	Unmodified	_FILKPAIK_					0	0	0	1	F1MEW3	F1MEW3	F1MEW3	MULTI-MSMS	20140904-PurClathDigest-1ug-02	2	310.54	3	310.544268	928.610974	37136.45	-4.4356	-0.0013774	-0.12232	-3.7985E-05	-4.5579	-0.0014154	310.544190384848	40.131	0.39958	40.131	39.977	40.377	0					32	11	4	0	0	0	0.047639	1	4592	67.032
FILKPAIK	8	Unmodified	_FILKPAIK_					0	0	0	1	F1MEW3	F1MEW3	F1MEW3	MULTI-MSMS	20140904-PurClathDigest-1ug-02	2	465.31	2	465.312764	928.610974	30874.63	-4.6728	-0.0021743	0.67985	0.00031634	-3.9929	-0.001858	465.313031251216	40.133	0.528	40.133	39.946	40.474	0					41	15	4	0	0	0	0.033795	1	4602	89.046
FILKPAIK	8	Unmodified	_FILKPAIK_					0	0	0	1	F1MEW3	F1MEW3	F1MEW3	MULTI-MSMS	20140904-PurClathDigest-1ug-03	3	310.54	3	310.544268	928.610974	37838.8	-3.9795	-0.0012358	-1.2861	-0.00039939	-5.2656	-0.0016352	310.543865658093	40.208	0.33525	40.208	40.063	40.398	3.8147E-06					28	9	4	0	0	0	0.055742	1	4388	58.917
FILKPAIK	8	Unmodified	_FILKPAIK_					0	0	0	1	F1MEW3	F1MEW3	F1MEW3	MULTI-MSMS	20140904-PurClathDigest-1ug-03	3	465.31	2	465.312764	928.610974	30724.33	-4.4752	-0.0020824	0.25865	0.00012035	-4.2165	-0.001962	465.312772907291	40.21	0.40142	40.21	40.063	40.464	0					33	11	4	0	0	0	0.033795	1	4392	89.046
FIQYLASR	8	Unmodified	_FIQYLASR_					0	0	0	0	F1MGT4;F1N605	F1MGT4	F1MGT4	MULTI-MSMS	20140904-PurClathDigest-1ug-01	1	499.27	2	499.276909	996.539266	29832.75	-5.4889	-0.0027405	-0.10355	-5.1701E-05	-5.5925	-0.0027922	499.276717225587	41.892	0.2455	41.892	41.759	42.004	0					17	7	3	0	0	0	0.00098927	1	5537	150.05
FIQYLASR	8	Unmodified	_FIQYLASR_					0	0	0	0	F1MGT4;F1N605	F1MGT4	F1MGT4	MULTI-MSMS	20140904-PurClathDigest-1ug-03	3	499.27	2	499.276909	996.539266	30359.57	-6.0143	-0.0030028	0.36773	0.0001836	-5.6465	-0.0028192	499.277034659343	42.224	0.4015	42.224	42.036	42.437	3.8147E-06					22	11	3	0	0	0	0.0010398	1	4885	138.54
FLEQQNK	7	Unmodified	_FLEQQNK_					0	0	0	0	Q28115;F1N566;CON__H-INV:HIT000292931;CON__Q61726;E1B898;CON__O43790;CON__Q6NT21;CON__P78385;A6QP32;A4FUZ0;Q148H4;CON__Q14533;Q0VD04;CON__P78386;CON__Q8N1N4-2;CON__Q7RTT2;A6QNX5	Q28115	Q28115	MULTI-MSMS	20140904-PurClathDigest-1ug-01	1	453.73	2	453.737617	905.460681	31147.43	-6.1419	-0.0027868	2.6332	0.0011948	-3.5087	-0.001592	453.737727076432	33.513	0.32992	33.513	33.301	33.631	0					24	10	3	0	0	0	0.0069228	1	3377	117.93
FLEQQNK	7	Unmodified	_FLEQQNK_					0	0	0	0	Q28115;F1N566;CON__H-INV:HIT000292931;CON__Q61726;E1B898;CON__O43790;CON__Q6NT21;CON__P78385;A6QP32;A4FUZ0;Q148H4;CON__Q14533;Q0VD04;CON__P78386;CON__Q8N1N4-2;CON__Q7RTT2;A6QNX5	Q28115	Q28115	MULTI-MSMS	20140904-PurClathDigest-1ug-02	2	453.74	2	453.737617	905.460681	30769.81	-5.362	-0.0024329	0.80835	0.00036678	-4.5536	-0.0020662	453.737533262107	33.774	0.40134	33.774	33.524	33.926	0					26	11	3	0	0	0	0.0067186	1	3098	119.57
FLEQQNK	7	Unmodified	_FLEQQNK_					0	0	0	0	Q28115;F1N566;CON__H-INV:HIT000292931;CON__Q61726;E1B898;CON__O43790;CON__Q6NT21;CON__P78385;A6QP32;A4FUZ0;Q148H4;CON__Q14533;Q0VD04;CON__P78386;CON__Q8N1N4-2;CON__Q7RTT2;A6QNX5	Q28115	Q28115	MULTI-MSMS	20140904-PurClathDigest-1ug-03	3	453.73	2	453.737617	905.460681	30534.56	-5.594	-0.0025382	0.75506	0.0003426	-4.839	-0.0021956	453.737382068179	33.831	0.37441	33.831	33.61	33.985	0					22	10	3	0	0	0	0.014788	1	2936	94.262
FLEQQNQVLQTK	12	Unmodified	_FLEQQNQVLQTK_					0	0	0	0	CON__P04264;CON__P35908;CON__Q9R0H5;CON__Q6NXH9;G3MYU2;CON__Q7Z794;E1B991;G3MZ71	CON__P04264;CON__P35908	CON__P04264	MULTI-MSMS	20140904-PurClathDigest-1ug-01	1	738.39	2	738.396273	1474.77799	24187.04	-5.051	-0.0037296	0.010288	7.5968E-06	-5.0407	-0.0037221	738.39645097241	39.771	0.54675	39.771	39.579	40.126	0					69	17	6	0	0	0	6.1185E-07	1	4966	165.72
FLEQQNQVLQTK	12	Unmodified	_FLEQQNQVLQTK_					0	0	0	0	CON__P04264;CON__P35908;CON__Q9R0H5;CON__Q6NXH9;G3MYU2;CON__Q7Z794;E1B991;G3MZ71	CON__P04264;CON__P35908	CON__P04264	MULTI-MSMS	20140904-PurClathDigest-1ug-02	2	738.39	2	738.396273	1474.77799	24131.89	-4.2809	-0.003161	-0.22003	-0.00016247	-4.5009	-0.0033234	738.396362611626	40.142	0.56116	40.142	39.946	40.507	-3.8147E-06					68	16	6	0	0	0	8.1822E-07	1	4580	169.58
FLEQQNQVLQTK	12	Unmodified	_FLEQQNQVLQTK_					0	0	0	0	CON__P04264;CON__P35908;CON__Q9R0H5;CON__Q6NXH9;G3MYU2;CON__Q7Z794;E1B991;G3MZ71	CON__P04264;CON__P35908	CON__P04264	MULTI-MSMS	20140904-PurClathDigest-1ug-03	3	738.39	2	738.396273	1474.77799	24165.19	-4.3112	-0.0031833	-0.5594	-0.00041306	-4.8706	-0.0035964	738.396052307708	40.165	0.57092	40.165	39.959	40.53	-3.8147E-06					60	16	6	0	0	0	1.5629E-06	1	4360	149.57
FMELLEPLNER	11	Oxidation (M)	_FM(ox)ELLEPLNER_		FM(1)ELLEPLNER		FM(97.16)ELLEPLNER	0	0	1	0	F1MYC9	F1MYC9	F1MYC9	MULTI-MSMS	20140904-PurClathDigest-1ug-01	1	703.85	2	703.852852	1405.69115	25497.12	-3.8323	-0.0026974	-2.0278	-0.0014273	-5.8601	-0.0041246	703.851460312983	45.981	0.27359	45.981	45.816	46.09	-3.8147E-06					28	8	4	0	0	0	0.022897	1	6646	97.163
FNALFAQGNYSEAAK	15	Unmodified	_FNALFAQGNYSEAAK_					0	0	0	0	P49951;F1MPU0	P49951	P49951	MULTI-MSMS	20140904-PurClathDigest-1ug-01	1	815.89	2	815.896637	1629.77872	23277.06	-4.087	-0.0033345	-0.84957	-0.00069316	-4.9365	-0.0040277	815.896018458374	44.619	1.4951	44.619	44.352	45.847	0					135	49	6	0	0	0	1.1777E-07	2	6229	160.65
FNALFAQGNYSEAAK	15	Unmodified	_FNALFAQGNYSEAAK_					0	0	0	0	P49951;F1MPU0	P49951	P49951	MULTI-MSMS	20140904-PurClathDigest-1ug-02	2	815.89	2	815.896637	1629.77872	23357.53	-4.3922	-0.0035836	-0.25984	-0.000212	-4.652	-0.0037956	815.896499152528	45.119	1.0413	45.119	44.815	45.857	0					97	30	6	0	0	0	8.1221E-05	2	5874	113.65
FNALFAQGNYSEAAK	15	Unmodified	_FNALFAQGNYSEAAK_					0	0	0	0	P49951;F1MPU0	P49951	P49951	MULTI-MSMS	20140904-PurClathDigest-1ug-03	3	815.89	2	815.896637	1629.77872	23446.79	-4.4158	-0.0036028	-0.39855	-0.00032517	-4.8143	-0.003928	815.896429193571	45.178	1.3185	45.178	44.93	46.249	0					103	41	7	0	0	0	4.6637E-05	2	5579	122.63
FNALFVRPHIR	11	Unmodified	_FNALFVRPHIR_					0	0	0	1	E1BDX8	E1BDX8	E1BDX8	MULTI-SECPEP	20140904-PurClathDigest-1ug-01	1	457.25	3	457.266568	1368.77787	29963.82	-5.2477	-0.0023996	-1.3694	-0.00062617	-6.6171	-0.0030258	457.26513779371	41.228	0.43625	41.228	40.954	41.39	0					34	13	4	0	0	0	0.062127	1	5331	32.218
FNYGFEYLGVQDK	13	Unmodified	_FNYGFEYLGVQDK_					0	0	0	0	E1BDX8	E1BDX8	E1BDX8	MULTI-MSMS	20140904-PurClathDigest-1ug-02	2	790.37	2	790.375006	1578.73546	24065.5	-2.7241	-0.002153	0.37957	0.0003	-2.3445	-0.001853	790.375240607614	49.399	0.42742	49.399	49.227	49.655	0					16	11	2	0	0	0	0.0023161	1	6928	94.09
FNYGFEYLGVQDK	13	Unmodified	_FNYGFEYLGVQDK_					0	0	0	0	E1BDX8	E1BDX8	E1BDX8	MULTI-MSMS	20140904-PurClathDigest-1ug-03	3	790.37	2	790.375006	1578.73546	23877.46	-2.8915	-0.0022854	0.78966	0.00062413	-2.1018	-0.0016612	790.375926272972	49.492	0.95126	49.492	48.897	49.848	0					36	27	2	0	0	0	0.0015888	1	6698	96.464
FQDWDKTSLENTFIHNTGK	19	Unmodified	_FQDWDKTSLENTFIHNTGK_					0	0	0	1	F1MGK5	F1MGK5	F1MGK5	MULTI-MSMS	20140904-PurClathDigest-1ug-01	1	761.37	3	761.034313	2280.08111	24563.31	-3.6428	-0.0027723	0.8344	0.00063501	-2.8084	-0.0021373	761.369051336106	45.168	0.41342	45.168	45.046	45.46	0					36	13	4	0	0	0	3.8769E-13	1	6416	164.2
FQDWDKTSLENTFIHNTGK	19	Unmodified	_FQDWDKTSLENTFIHNTGK_					0	0	0	1	F1MGK5	F1MGK5	F1MGK5	MULTI-MSMS	20140904-PurClathDigest-1ug-01	1	571.28	4	571.027554	2280.08111	27514.44	-4.228	-0.0024143	1.526	0.00087139	-2.702	-0.0015429	571.279192695164	45.176	0.35133	45.176	45.017	45.369	-3.8147E-06					41	11	6	0	0	0	0.031085	1	6428	51.566
FQDWDKTSLENTFIHNTGK	19	Unmodified	_FQDWDKTSLENTFIHNTGK_					0	0	0	1	F1MGK5	F1MGK5	F1MGK5	MULTI-MSMS	20140904-PurClathDigest-1ug-02	2	761.37	3	761.034313	2280.08111	24534.86	-2.2102	-0.0016821	-0.097071	-7.3874E-05	-2.3073	-0.0017559	761.368766491088	45.747	0.30175	45.747	45.616	45.917	0					29	9	4	0	0	0	4.7413E-22	1	6000	214.66
FQDWDKTSLENTFIHNTGK	19	Unmodified	_FQDWDKTSLENTFIHNTGK_					0	0	0	1	F1MGK5	F1MGK5	F1MGK5	MULTI-MSMS	20140904-PurClathDigest-1ug-02	2	571.28	4	571.027554	2280.08111	27835.89	-2.4781	-0.0014151	-0.13838	-7.9021E-05	-2.6165	-0.0014941	571.278361040888	45.742	0.30175	45.742	45.616	45.917	0					35	9	5	0	0	0	0.00067144	1	6008	83.894
FQDWDKTSLENTFIHNTGK	19	Unmodified	_FQDWDKTSLENTFIHNTGK_					0	0	0	1	F1MGK5	F1MGK5	F1MGK5	MULTI-MSMS	20140904-PurClathDigest-1ug-03	3	761.37	3	761.034313	2280.08111	24563.25	-3.2218	-0.0024519	0.37347	0.00028422	-2.8484	-0.0021677	761.368840230759	45.681	0.437	45.681	45.535	45.972	0					38	13	5	0	0	0	9.9811E-14	1	5729	183.74
FQDWDKTSLENTFIHNTGK	19	Unmodified	_FQDWDKTSLENTFIHNTGK_					0	0	0	1	F1MGK5	F1MGK5	F1MGK5	MULTI-MSMS	20140904-PurClathDigest-1ug-03	3	571.28	4	571.027554	2280.08111	28148.41	-3.2743	-0.0018697	0.08497	4.852E-05	-3.1893	-0.0018212	571.278575775276	45.68	0.34008	45.68	45.535	45.875	0					34	10	5	0	0	0	0.00031815	1	5737	81.01
FQEHLQLQNLGINPANIGFSTLTMESDK	28	Oxidation (M)	_FQEHLQLQNLGINPANIGFSTLTM(ox)ESDK_		FQEHLQLQNLGINPANIGFSTLTM(1)ESDK		FQEHLQLQNLGINPANIGFSTLTM(65.77)ESDK	0	0	1	0	P49951	P49951	P49951	MULTI-MSMS	20140904-PurClathDigest-1ug-01	1	1054.86	3	1054.52391	3160.54991	20580.56	-1.9653	-0.0020725	-0.76814	-0.00081002	-2.7335	-0.0028825	1054.85770424776	51.647	1.5406	51.647	50.995	52.535	0					217	48	6	0	0	0	0.012601	2	8027	65.766
FQEHLQLQNLGINPANIGFSTLTMESDK	28	Oxidation (M)	_FQEHLQLQNLGINPANIGFSTLTM(ox)ESDK_		FQEHLQLQNLGINPANIGFSTLTM(1)ESDK		FQEHLQLQNLGINPANIGFSTLTM(80.72)ESDK	0	0	1	0	P49951	P49951	P49951	MULTI-MSMS	20140904-PurClathDigest-1ug-02	2	1055.19	3	1054.52391	3160.54991	20694.93	-2.1107	-0.0022258	-0.3064	-0.0003231	-2.4171	-0.0025489	1054.85827835889	51.648	1.4125	51.648	51.179	52.592	0					209	42	9	0	0	0	0.0026602	2	7440	80.722
FQEHLQLQNLGINPANIGFSTLTMESDK	28	Oxidation (M)	_FQEHLQLQNLGINPANIGFSTLTM(ox)ESDK_		FQEHLQLQNLGINPANIGFSTLTM(1)ESDK		FQEHLQLQNLGINPANIGFSTLTM(49.52)ESDK	0	0	1	0	P49951	P49951	P49951	MULTI-MSMS	20140904-PurClathDigest-1ug-03	3	1054.86	3	1054.52391	3160.54991	20671.23	-2.0772	-0.0021905	-0.6964	-0.00073437	-2.7736	-0.0029249	1054.85804293495	51.7	1.7972	51.7	51.204	53.002	3.8147E-06					249	52	9	0	0	0	0.029088	2	7208	49.525
FQEHLQLQNLGINPANIGFSTLTMESDK	28	Unmodified	_FQEHLQLQNLGINPANIGFSTLTMESDK_					0	0	0	0	P49951	P49951	P49951	MULTI-MSMS	20140904-PurClathDigest-1ug-01	1	1049.52	3	1049.19228	3144.555	20453.19	-2.0035	-0.002102	0.71496	0.00075013	-1.2885	-0.0013519	1049.52725074794	52.546	0.46766	52.546	52.378	52.846	0					54	14	6	0	0	0	0.0038085	1	8346	69.016
FQEHLQLQNLGINPANIGFSTLTMESDK	28	Unmodified	_FQEHLQLQNLGINPANIGFSTLTMESDK_					0	0	0	0	P49951	P49951	P49951	MULTI-MSMS	20140904-PurClathDigest-1ug-02	2	1049.53	3	1049.19228	3144.555	20481.21	-2.3175	-0.0024315	0.83658	0.00087773	-1.4809	-0.0015538	1049.52746808032	52.626	0.79316	52.626	52.394	53.188	0					67	22	7	0	0	0	0.00032041	1	7693	76.573
FQEHLQLQNLGINPANIGFSTLTMESDK	28	Unmodified	_FQEHLQLQNLGINPANIGFSTLTMESDK_					0	0	0	0	P49951	P49951	P49951	MULTI-MSMS	20140904-PurClathDigest-1ug-03	3	1049.53	3	1049.19228	3144.555	20203.84	-2.1587	-0.0022649	0.75203	0.00078902	-1.4067	-0.0014759	1049.52709363332	52.643	0.70592	52.643	52.407	53.113	3.8147E-06					71	19	7	0	0	0	0.00010671	1	7433	91.1
FQFFQR	6	Unmodified	_FQFFQR_					0	0	0	0	E1BFB0	E1BFB0	E1BFB0	MULTI-MSMS	20140904-PurClathDigest-1ug-01	1	436.72	2	436.724313	871.434072	31286.56	-3.9606	-0.0017297	-0.29663	-0.00012954	-4.2572	-0.0018592	436.724095562319	45.396	0.3285	45.396	45.251	45.579	0					19	10	3	0	0	0	0.0042508	1	6481	154.44
FQFFQR	6	Unmodified	_FQFFQR_					0	0	0	0	E1BFB0	E1BFB0	E1BFB0	MULTI-MSMS	20140904-PurClathDigest-1ug-02	2	436.72	2	436.724313	871.434072	31958.2	-3.0144	-0.0013165	-0.80073	-0.0003497	-3.8151	-0.0016662	436.723889662888	45.995	0.2805	45.995	45.857	46.137	0					20	8	3	0	0	0	0.0070706	1	6079	143.88
FQFFQR	6	Unmodified	_FQFFQR_					0	0	0	0	E1BFB0	E1BFB0	E1BFB0	MULTI-MSMS	20140904-PurClathDigest-1ug-03	3	436.72	2	436.724313	871.434072	32468.71	-3.339	-0.0014582	-0.81459	-0.00035575	-4.1536	-0.001814	436.723765423659	45.986	0.28484	45.986	45.843	46.128	0					19	8	3	0	0	0	0.0045342	1	5821	152.49
FSPEVPGQK	9	Unmodified	_FSPEVPGQK_					0	0	0	0	F1N1S2	F1N1S2	F1N1S2	MULTI-MSMS	20140904-PurClathDigest-1ug-01	1	494.76	2	494.758549	987.502546	30206.3	-5.5312	-0.0027366	-0.13968	-6.9108E-05	-5.6709	-0.0028057	494.758220653014	37.512	0.80392	37.512	37.251	38.055	0					53	25	4	0	0	0	0.045453	1	4392	76.605
FSPEVPGQK	9	Unmodified	_FSPEVPGQK_					0	0	0	0	F1N1S2	F1N1S2	F1N1S2	MULTI-MSMS	20140904-PurClathDigest-1ug-02	2	494.76	2	494.758549	987.502546	30185.6	-4.617	-0.0022843	0.36494	0.00018056	-4.252	-0.0021037	494.75845592684	37.643	0.51917	37.643	37.358	37.878	0					43	14	4	0	0	0	0.055685	1	4012	70.816
FSPEVPGQK	9	Unmodified	_FSPEVPGQK_					0	0	0	0	F1N1S2	F1N1S2	F1N1S2	MULTI-MSMS	20140904-PurClathDigest-1ug-03	3	494.76	2	494.758549	987.502546	30019.26	-4.3838	-0.0021689	0.41865	0.00020713	-3.9651	-0.0019618	494.75824500227	37.737	0.67133	37.737	37.364	38.035	0					46	17	4	0	0	0	0.0087324	1	3832	98.582
FSSSSGYGGGSSR	13	Unmodified	_FSSSSGYGGGSSR_					0	0	0	0	CON__P35527	CON__P35527	CON__P35527	MULTI-MSMS	20140904-PurClathDigest-1ug-01	1	618.26	2	618.267998	1234.52144	25872.86	-6.0447	-0.0037373	-0.61907	-0.00038275	-6.6638	-0.00412	618.268260979334	33.074	0.60325	33.074	32.698	33.301	0					54	18	5	0	0	0	3.6294E-07	1	3258	171.26
FSSSSGYGGGSSR	13	Unmodified	_FSSSSGYGGGSSR_					0	0	0	0	CON__P35527	CON__P35527	CON__P35527	MULTI-MSMS	20140904-PurClathDigest-1ug-02	2	618.27	2	618.267998	1234.52144	25852.32	-5.6165	-0.0034725	-0.28753	-0.00017777	-5.904	-0.0036503	618.268347701706	33.274	0.49325	33.274	33.031	33.524	3.8147E-06					39	12	5	0	0	0	1.3375E-06	1	2982	147.02
FSSSSGYGGGSSR	13	Unmodified	_FSSSSGYGGGSSR_					0	0	0	0	CON__P35527	CON__P35527	CON__P35527	MULTI-MSMS	20140904-PurClathDigest-1ug-03	3	618.27	2	618.267998	1234.52144	26807.9	-5.9141	-0.0036565	0.26908	0.00016636	-5.645	-0.0034901	618.26852180621	33.356	0.43375	33.356	33.139	33.573	0					36	10	5	0	0	0	7.5608E-07	1	2829	161.48
FSTFAGSITGPLYTHR	16	Unmodified	_FSTFAGSITGPLYTHR_					0	0	0	0	F1MDZ2;O77788	F1MDZ2	F1MDZ2	MULTI-MSMS	20140904-PurClathDigest-1ug-01	1	585.63	3	585.633533	1753.87877	27337.78	-3.3564	-0.0019656	-1.9978	-0.00117	-5.3542	-0.0031356	585.6324838701	45.777	1.5881	45.777	45.046	46.635	3.8147E-06					171	52	7	0	0	0	3.1226E-08	1	6560	141
FSTFAGSITGPLYTHR	16	Unmodified	_FSTFAGSITGPLYTHR_					0	0	0	0	F1MDZ2;O77788	F1MDZ2	F1MDZ2	MULTI-MSMS	20140904-PurClathDigest-1ug-01	1	877.94	2	877.946661	1753.87877	22517.78	-3.638	-0.003194	-1.8418	-0.001617	-5.4798	-0.0048109	877.944891298038	45.778	0.60266	45.778	45.579	46.182	3.8147E-06					60	19	4	0	0	0	1.0413E-13	1	6572	212.39
FSTFAGSITGPLYTHR	16	Unmodified	_FSTFAGSITGPLYTHR_					0	0	0	0	F1MDZ2;O77788	F1MDZ2	F1MDZ2	MULTI-MSMS	20140904-PurClathDigest-1ug-02	2	585.97	3	585.633533	1753.87877	27806.42	-3.9173	-0.0022941	-2.0124	-0.0011786	-5.9298	-0.0034727	585.632292672854	46.366	1.0793	46.366	46.046	47.125	-3.8147E-06					120	34	5	0	0	0	0.00044518	1	6141	87.647
FSTFAGSITGPLYTHR	16	Unmodified	_FSTFAGSITGPLYTHR_					0	0	0	0	F1MDZ2;O77788	F1MDZ2	F1MDZ2	MULTI-MSMS	20140904-PurClathDigest-1ug-02	2	877.94	2	877.946661	1753.87877	22296.42	-3.9252	-0.0034461	-2.373	-0.0020834	-6.2983	-0.0055295	877.944500643542	46.36	0.71083	46.36	46.076	46.787	-3.8147E-06					72	22	5	0	0	0	3.5828E-13	1	6149	207.4
FSTFAGSITGPLYTHR	16	Unmodified	_FSTFAGSITGPLYTHR_					0	0	0	0	F1MDZ2;O77788	F1MDZ2	F1MDZ2	MULTI-MSMS	20140904-PurClathDigest-1ug-03	3	585.63	3	585.633533	1753.87877	27754.97	-3.2807	-0.0019213	-2.168	-0.0012697	-5.4487	-0.003191	585.632116049964	46.278	0.96191	46.278	45.972	46.934	0					94	30	5	0	0	0	1.103E-05	1	5867	131.86
FSTFAGSITGPLYTHR	16	Unmodified	_FSTFAGSITGPLYTHR_					0	0	0	0	F1MDZ2;O77788	F1MDZ2	F1MDZ2	MULTI-MSMS	20140904-PurClathDigest-1ug-03	3	878.44	2	877.946661	1753.87877	22207.81	-3.7361	-0.0032801	-2.4653	-0.0021644	-6.2014	-0.0054445	877.944609702009	46.261	1.3046	46.261	45.285	46.589	0					93	41	6	0	0	0	5.6842E-13	1	5873	203.27
FSVEDNR	7	Unmodified	_FSVEDNR_					0	0	0	0	E1BKN2	E1BKN2	E1BKN2	MULTI-MSMS	20140904-PurClathDigest-1ug-01	1	433.7	2	433.703774	865.392996	32314.21	-7.1202	-0.003088	0.52571	0.000228	-6.5945	-0.00286	433.703989040304	35.183	0.30708	35.183	35.037	35.344	0					22	9	3	0	0	0	0.0050553	1	3802	134.66
FSVEDNR	7	Unmodified	_FSVEDNR_					0	0	0	0	E1BKN2	E1BKN2	E1BKN2	MULTI-MSMS	20140904-PurClathDigest-1ug-02	2	433.7	2	433.703774	865.392996	31695.37	-7.2248	-0.0031334	1.4883	0.00064548	-5.7365	-0.0024879	433.704363161583	35.575	0.36217	35.575	35.392	35.754	3.8147E-06					29	10	4	0	0	0	0.0021386	1	3517	164.89
FSVEDNR	7	Unmodified	_FSVEDNR_					0	0	0	0	E1BKN2	E1BKN2	E1BKN2	MULTI-MSMS	20140904-PurClathDigest-1ug-03	3	433.7	2	433.703774	865.392996	32177.94	-7.7016	-0.0033402	2.1267	0.00092235	-5.5749	-0.0024179	433.704659416966	35.508	0.3785	35.508	35.33	35.708	0					26	10	4	0	0	0	0.0033798	1	3324	149.4
FTQDTQPHYIYSPR	14	Unmodified	_FTQDTQPHYIYSPR_					0	0	0	0	E1BDX8	E1BDX8	E1BDX8	MULTI-MSMS	20140904-PurClathDigest-1ug-02	2	584.95	3	584.949521	1751.82673	26968.99	-4.493	-0.0026282	-0.29162	-0.00017058	-4.7847	-0.0027988	584.950330983944	39.154	0.35992	39.154	38.928	39.288	0					29	10	4	0	0	0	0.0072461	1	4376	59.68
FTVLTESAAK	10	Unmodified	_FTVLTESAAK_					0	0	0	0	P02548	P02548	P02548	MULTI-MSMS	20140904-PurClathDigest-1ug-01	1	533.79	2	533.792589	1065.57063	28267.37	-5.9265	-0.0031635	-0.19184	-0.0001024	-6.1183	-0.0032659	533.792522833906	40.128	1.0073	40.128	39.914	40.922	0					91	32	6	0	0	0	0.006154	2	5056	104.22
FTVLTESAAK	10	Unmodified	_FTVLTESAAK_					0	0	0	0	P02548	P02548	P02548	MULTI-MSMS	20140904-PurClathDigest-1ug-02	2	533.79	2	533.792589	1065.57063	28295.49	-5.8222	-0.0031078	0.035255	1.8819E-05	-5.7869	-0.003089	533.792637064195	40.568	1.025	40.568	40.279	41.304	0					90	31	6	0	0	0	0.0027659	2	4683	113.93
FTVLTESAAK	10	Unmodified	_FTVLTESAAK_					0	0	0	0	P02548	P02548	P02548	MULTI-MSMS	20140904-PurClathDigest-1ug-03	3	533.79	2	533.792589	1065.57063	28722.27	-5.6745	-0.003029	0.02056	1.0975E-05	-5.6539	-0.003018	533.792654074871	40.572	0.86867	40.572	40.398	41.267	0					84	26	5	0	0	0	0.0027659	1	4456	113.93
FWEVISDEHGIDPTGSYHGDSDLQLER	27	Unmodified	_FWEVISDEHGIDPTGSYHGDSDLQLER_					0	0	0	0	E1BJB1;Q6B856;G3X7R7;G3N1W7	E1BJB1	E1BJB1	MULTI-MSMS	20140904-PurClathDigest-1ug-01	1	1035.14	3	1034.80737	3101.40027	20258.6	-4.2253	-0.0043724	1.7875	0.0018497	-2.4378	-0.0025226	1035.14423581274	47.474	0.60425	47.474	47.245	47.849	0					86	19	7	0	0	0	0.00012239	1	7008	77.445
FWEVISDEHGIDPTGSYHGDSDLQLER	27	Unmodified	_FWEVISDEHGIDPTGSYHGDSDLQLER_					0	0	0	0	E1BJB1;Q6B856;G3X7R7;G3N1W7	E1BJB1	E1BJB1	MULTI-MSMS	20140904-PurClathDigest-1ug-02	2	1035.14	3	1034.80737	3101.40027	20467.81	-4.3117	-0.0044617	0.97655	0.0010105	-3.3351	-0.0034512	1035.47741945043	47.647	0.8105	47.647	47.314	48.125	0					87	24	7	0	0	0	5.6368E-05	1	6470	94.73
FWEVISDEHGIDPTGSYHGDSDLQLER	27	Unmodified	_FWEVISDEHGIDPTGSYHGDSDLQLER_					0	0	0	0	E1BJB1;Q6B856;G3X7R7;G3N1W7	E1BJB1	E1BJB1	MULTI-MSMS	20140904-PurClathDigest-1ug-03	3	1035.47	3	1034.80737	3101.40027	21056.2	-4.1333	-0.0042771	-0.017301	-1.7903E-05	-4.1506	-0.004295	1035.14283880183	47.573	1.0315	47.573	47.127	48.159	0					101	30	5	0	0	0	6.6697E-05	1	6181	99.954
FWEVISDEHGIDPTGTYHGDSDLQLDR	27	Unmodified	_FWEVISDEHGIDPTGTYHGDSDLQLDR_					0	0	0	0	Q2KJD0	Q2KJD0	Q2KJD0	MULTI-MSMS	20140904-PurClathDigest-1ug-02	2	1035.48	3	1034.80737	3101.40027	20467.81	-4.3117	-0.0044617	0.97655	0.0010105	-3.3351	-0.0034512	1035.47741945043	47.647	0.8105	47.647	47.314	48.125	0					87	24	7	0	0	0	0.014753	1	6535	57.21
FWEVISDEHGIDPTGTYHGDSDLQLDR	27	Unmodified	_FWEVISDEHGIDPTGTYHGDSDLQLDR_					0	0	0	0	Q2KJD0	Q2KJD0	Q2KJD0	MULTI-MSMS	20140904-PurClathDigest-1ug-03	3	776.61	4	776.357345	3101.40027	23091.1	-4.165	-0.0032335	-1.5993	-0.0012417	-5.7643	-0.0044752	776.608105208457	47.587	0.67733	47.587	47.285	47.963	0					34	19	3	0	0	0	1.4781E-07	1	6259	103.33
FWEVISDEHGIDPTGTYHGDSDLQLER	27	Unmodified	_FWEVISDEHGIDPTGTYHGDSDLQLER_					0	0	0	0	Q3MHM5;Q3ZBU7	Q3MHM5;Q3ZBU7	Q3MHM5	MULTI-MSMS	20140904-PurClathDigest-1ug-01	1	780.36	4	779.861257	3115.41592	23411.73	-4.0445	-0.0031542	0.46444	0.0003622	-3.5801	-0.002792	780.111832452696	47.558	0.50825	47.558	47.341	47.849	0					61	16	6	0	0	0	0.002824	1	7045	62.57
FWEVISDEHGIDPTGTYHGDSDLQLER	27	Unmodified	_FWEVISDEHGIDPTGTYHGDSDLQLER_					0	0	0	0	Q3MHM5;Q3ZBU7	Q3MHM5;Q3ZBU7	Q3MHM5	MULTI-MSMS	20140904-PurClathDigest-1ug-02	2	780.36	4	779.861257	3115.41592	23758.03	-4.1766	-0.0032572	0.89108	0.00069492	-3.2855	-0.0025622	780.363660708659	47.729	0.49392	47.729	47.538	48.032	0					51	14	5	0	0	0	0.00023605	1	6510	80.02
FWEVISDEHGIDPTGTYHGDSDLQLER	27	Unmodified	_FWEVISDEHGIDPTGTYHGDSDLQLER_					0	0	0	0	Q3MHM5;Q3ZBU7	Q3MHM5;Q3ZBU7	Q3MHM5	MULTI-MSMS	20140904-PurClathDigest-1ug-02	2	1039.81	3	1039.47925	3115.41592	20738.64	-4.3415	-0.0045129	-0.31253	-0.00032487	-4.654	-0.0048377	1040.14716938522	47.733	0.49392	47.733	47.538	48.032	0					52	14	5	0	0	0	0.00012095	1	6516	98.98
FWEVISDEHGIDPTGTYHGDSDLQLER	27	Unmodified	_FWEVISDEHGIDPTGTYHGDSDLQLER_					0	0	0	0	Q3MHM5;Q3ZBU7	Q3MHM5;Q3ZBU7	Q3MHM5	MULTI-MSMS	20140904-PurClathDigest-1ug-03	3	780.36	4	779.861257	3115.41592	24019.91	-4.379	-0.003415	0.39775	0.00031019	-3.9813	-0.0031048	780.111659798086	47.662	0.51042	47.662	47.419	47.93	0					54	14	5	0	0	0	0.016352	1	6230	50.029
FWEVISDEHGIDPTGTYHGDSDLQLER	27	Unmodified	_FWEVISDEHGIDPTGTYHGDSDLQLER_					0	0	0	0	Q3MHM5;Q3ZBU7	Q3MHM5;Q3ZBU7	Q3MHM5	MULTI-MSMS	20140904-PurClathDigest-1ug-03	3	1039.81	3	1039.47925	3115.41592	20712.92	-3.9851	-0.0041425	-0.86095	-0.00089494	-4.8461	-0.0050374	1039.81253864934	47.706	0.80292	47.706	47.452	48.254	0					68	23	6	0	0	0	5.3947E-05	1	6249	87.196
FYFVGDEDLLEIIGNSK	17	Unmodified	_FYFVGDEDLLEIIGNSK_					0	0	0	0	E1BDX8	E1BDX8	E1BDX8	MULTI-MSMS	20140904-PurClathDigest-1ug-01	1	980.49	2	979.990931	1957.96731	21219.03	-2.5826	-0.0025309	-0.30497	-0.00029887	-2.8876	-0.0028298	980.492175324219	57.647	0.36591	57.647	57.485	57.851	3.8147E-06					28	7	5	0	0	0	0.0013659	1	9499	72.433
FYFVGDEDLLEIIGNSK	17	Unmodified	_FYFVGDEDLLEIIGNSK_					0	0	0	0	E1BDX8	E1BDX8	E1BDX8	MULTI-MSMS	20140904-PurClathDigest-1ug-02	2	980.49	2	979.990931	1957.96731	21578.05	-2.1499	-0.0021069	-0.55327	-0.0005422	-2.7031	-0.0026491	979.990240136254	57.67	0.47708	57.67	57.45	57.927	0					28	8	5	0	0	0	0.040359	1	8710	46.873
GADEAALAR	9	Unmodified	_GADEAALAR_					0	0	0	0	P02548	P02548	P02548	MULTI-MSMS	20140904-PurClathDigest-1ug-01	1	437.22	2	437.224874	872.435195	31310.53	-6.2233	-0.002721	-0.21359	-9.3385E-05	-6.4369	-0.0028144	437.224801856398	33.509	0.51459	33.509	33.147	33.661	0					33	16	4	0	0	0	0.014185	1	3369	95.502
GADEAALAR	9	Unmodified	_GADEAALAR_					0	0	0	0	P02548	P02548	P02548	MULTI-MSMS	20140904-PurClathDigest-1ug-02	2	437.22	2	437.224874	872.435195	31516.43	-5.5562	-0.0024293	-0.4708	-0.00020584	-6.027	-0.0026352	437.22466082974	33.78	0.58392	33.78	33.375	33.959	3.8147E-06					33	16	4	0	0	0	0.005937	1	3102	109.48
GADEAALAR	9	Unmodified	_GADEAALAR_					0	0	0	0	P02548	P02548	P02548	MULTI-MSMS	20140904-PurClathDigest-1ug-03	3	437.22	2	437.224874	872.435195	31364.74	-5.7359	-0.0025079	-0.80807	-0.00035331	-6.544	-0.0028612	437.224514104136	33.834	0.37441	33.834	33.61	33.985	0					25	10	3	0	0	0	0.0030466	1	2941	117.89
GANESLER	8	Unmodified	_GANESLER_					0	0	0	0	Q08DH7	Q08DH7	Q08DH7	MULTI-MSMS	20140904-PurClathDigest-1ug-01	1	438.21	2	438.214506	874.414459	31270.15	-7.6004	-0.0033306	-2.5199	-0.0011042	-10.12	-0.0044349	438.213369360902	31.832	0.41008	31.832	31.652	32.062	0					37	12	4	0	0	0	0.0010784	1	2929	132.08
GANESLER	8	Unmodified	_GANESLER_					0	0	0	0	Q08DH7	Q08DH7	Q08DH7	MULTI-MSMS	20140904-PurClathDigest-1ug-02	2	438.21	2	438.214506	874.414459	30690.89	-7.4915	-0.0032829	-1.9081	-0.00083617	-9.3996	-0.004119	438.21367342622	31.868	0.42492	31.868	31.698	32.123	-1.9073E-06					27	11	3	0	0	0	0.0020845	1	2666	122.18
GANESLER	8	Unmodified	_GANESLER_					0	0	0	0	Q08DH7	Q08DH7	Q08DH7	MULTI-MSMS	20140904-PurClathDigest-1ug-03	3	438.21	2	438.214506	874.414459	31162.33	-7.7436	-0.0033933	-1.7398	-0.00076239	-9.4833	-0.0041557	438.213748541576	31.941	0.62758	31.941	31.698	32.325	0					40	16	4	0	0	0	0.0010784	1	2515	132.08
GAQELAASSQQK	12	Unmodified	_GAQELAASSQQK_					0	0	0	0	Q2KJ21;F1N037	Q2KJ21	Q2KJ21	MULTI-MSMS	20140904-PurClathDigest-1ug-03	3	609.3	2	609.309666	1216.60478	27010.51	-7.0832	-0.0043158	-1.1059	-0.00067384	-8.1891	-0.0049897	609.308979761703	32.438	0.28875	32.438	32.29	32.579	0					19	7	3	0	0	0	0.00018756	1	2637	124.21
GDSALFAVNGFNILVDGGSDR	21	Unmodified	_GDSALFAVNGFNILVDGGSDR_					0	0	0	0	F1N3M8;G3MYP5	F1N3M8;G3MYP5	G3MYP5	MULTI-MSMS	20140904-PurClathDigest-1ug-01	1	1063.02	2	1062.52145	2123.02835	20236.91	-2.6118	-0.0027751	-1.2825	-0.0013627	-3.8943	-0.0041378	1063.02162646921	54.835	0.4155	54.835	54.655	55.07	-3.8147E-06					39	12	4	0	0	0	0.0021392	1	8930	74.776
GDSALFAVNGFNILVDGGSDR	21	Unmodified	_GDSALFAVNGFNILVDGGSDR_					0	0	0	0	F1N3M8;G3MYP5	F1N3M8;G3MYP5	G3MYP5	MULTI-MSMS	20140904-PurClathDigest-1ug-03	3	1063.02	2	1062.52145	2123.02835	20856.28	-2.7947	-0.0029694	-0.64799	-0.0006885	-3.4427	-0.0036579	1063.02158492127	55.34	0.53408	55.34	55.116	55.65	0					40	14	4	0	0	0	0.00075509	1	8011	88.176
GDSALFAVNGFNILVDGGSDR	21	Deamidation (NQ)	_GDSALFAVN(de)GFNILVDGGSDR_	GDSALFAVN(0.955)GFN(0.045)ILVDGGSDR		GDSALFAVN(13.27)GFN(-13.27)ILVDGGSDR		0	1	0	0	F1N3M8;G3MYP5	F1N3M8;G3MYP5	G3MYP5	MULTI-MSMS	20140904-PurClathDigest-1ug-02	2	1063.51	2	1063.01346	2124.01236	20725.48	-3.4421	-0.0036589	0.44949	0.00047781	-2.9926	-0.0031811	1063.5156189627	54.737	0.69092	54.737	54.359	55.049	-3.8147E-06					55	18	5	0	0	0	7.307E-05	1	8167	109.65
GDSALFAVNGFNILVDGGSDR	21	Deamidation (NQ)	_GDSALFAVN(de)GFNILVDGGSDR_	GDSALFAVN(0.992)GFN(0.008)ILVDGGSDR		GDSALFAVN(20.92)GFN(-20.92)ILVDGGSDR		0	1	0	0	F1N3M8;G3MYP5	F1N3M8;G3MYP5	G3MYP5	MULTI-MSMS	20140904-PurClathDigest-1ug-03	3	1063.51	2	1063.01346	2124.01236	20214.58	-3.34	-0.0035504	-0.65974	-0.00070131	-3.9997	-0.0042517	1063.51444016804	54.835	0.5395	54.835	54.647	55.187	0					35	14	3	0	0	0	3.773E-05	1	7902	136.49
GEIDAHEDSFK	11	Unmodified	_GEIDAHEDSFK_					0	0	0	0	E1BFB0	E1BFB0	E1BFB0	MULTI-MSMS	20140904-PurClathDigest-1ug-01	1	624.28	2	624.280574	1246.5466	25100.78	-6.6142	-0.0041291	0.17972	0.00011219	-6.4345	-0.0040169	624.280556826847	35.52	0.33092	35.52	35.344	35.675	0					21	9	3	0	0	0	4.4886E-06	1	3907	153.54
GELSPSFLNPPLPR	14	Unmodified	_GELSPSFLNPPLPR_					0	0	0	0	F1N3M8;G3MYP5	F1N3M8;G3MYP5	G3MYP5	MULTI-MSMS	20140904-PurClathDigest-1ug-01	1	762.41	2	762.414465	1522.81438	23421.75	-2.3103	-0.0017614	-0.22388	-0.00017069	-2.5342	-0.0019321	762.915788356014	48.912	0.81733	48.912	48.424	49.241	0					76	26	4	0	0	0	0.00019678	1	7434	98.942
GELSPSFLNPPLPR	14	Unmodified	_GELSPSFLNPPLPR_					0	0	0	0	F1N3M8;G3MYP5	F1N3M8;G3MYP5	G3MYP5	MULTI-MSMS	20140904-PurClathDigest-1ug-02	2	762.41	2	762.414465	1522.81438	22515.16	-2.7888	-0.0021262	-0.39881	-0.00030405	-3.1876	-0.0024303	762.414187414758	49.122	0.8415	49.122	48.63	49.471	0					77	24	4	0	0	0	8.3254E-05	1	6870	119.39
GELSPSFLNPPLPR	14	Unmodified	_GELSPSFLNPPLPR_					0	0	0	0	F1N3M8;G3MYP5	F1N3M8;G3MYP5	G3MYP5	MULTI-MSMS	20140904-PurClathDigest-1ug-03	3	762.41	2	762.414465	1522.81438	22788.01	-2.9549	-0.0022528	0.080314	6.1233E-05	-2.8746	-0.0021916	762.414557824937	49.318	0.99284	49.318	48.754	49.747	0					80	28	5	0	0	0	1.7223E-07	1	6644	137.84
GFQEPAPQK	9	Unmodified	_GFQEPAPQK_					0	0	0	0	G3MYP5	G3MYP5	G3MYP5	MULTI-MSMS	20140904-PurClathDigest-1ug-01	1	501.25	2	501.256174	1000.49779	29754.2	-6.3864	-0.0032012	0.41322	0.00020713	-5.9732	-0.0029941	501.256473898328	34.11	0.64975	34.11	33.601	34.251	3.8147E-06					47	20	5	0	0	0	0.0072371	1	3520	102.62
GFQEPAPQK	9	Unmodified	_GFQEPAPQK_					0	0	0	0	G3MYP5	G3MYP5	G3MYP5	MULTI-MSMS	20140904-PurClathDigest-1ug-02	2	501.25	2	501.256174	1000.49779	30106.49	-6.3611	-0.0031886	0.96437	0.00048339	-5.3968	-0.0027052	501.256543557664	34.445	0.50051	34.445	34.25	34.751	0					44	14	5	0	0	0	0.00049801	1	3242	125.16
GFQEPAPQK	9	Unmodified	_GFQEPAPQK_					0	0	0	0	G3MYP5	G3MYP5	G3MYP5	MULTI-MSMS	20140904-PurClathDigest-1ug-03	3	501.25	2	501.256174	1000.49779	29997.83	-5.8933	-0.0029541	0.61359	0.00030757	-5.2797	-0.0026465	501.256436005136	34.473	0.38084	34.473	34.271	34.652	-3.8147E-06					35	10	5	0	0	0	0.0034279	1	3075	113.71
GFSSGSAVVSGGSR	14	Unmodified	_GFSSGSAVVSGGSR_					0	0	0	0	CON__P35908	CON__P35908	CON__P35908	MULTI-MSMS	20140904-PurClathDigest-1ug-01	1	627.8	2	627.807291	1253.60003	26535.22	-5.0712	-0.0031837	-0.1808	-0.00011351	-5.252	-0.0032972	627.807123603306	36.228	0.43666	36.228	36.056	36.493	0					34	13	4	0	0	0	2.7536E-05	1	4072	137.84
GFSSGSAVVSGGSR	14	Unmodified	_GFSSGSAVVSGGSR_					0	0	0	0	CON__P35908	CON__P35908	CON__P35908	MULTI-MSMS	20140904-PurClathDigest-1ug-02	2	627.8	2	627.807291	1253.60003	26334.97	-4.7054	-0.0029541	-0.23758	-0.00014916	-4.943	-0.0031032	627.807177083022	36.411	0.4835	36.411	36.252	36.736	3.8147E-06					41	13	5	0	0	0	8.7906E-08	1	3714	157.56
GFSSGSAVVSGGSR	14	Unmodified	_GFSSGSAVVSGGSR_					0	0	0	0	CON__P35908	CON__P35908	CON__P35908	MULTI-MSMS	20140904-PurClathDigest-1ug-03	3	627.8	2	627.807291	1253.60003	26937.81	-5.3281	-0.003345	-0.39768	-0.00024967	-5.7258	-0.0035947	627.806970938923	36.41	0.65125	36.41	36.159	36.81	0					45	17	5	0	0	0	7.5584E-08	1	3536	159.5
GGGGGGYGSGGSSYGSGGGSYGSGGGGGGGR	31	Unmodified	_GGGGGGYGSGGSSYGSGGGSYGSGGGGGGGR_					0	0	0	0	CON__P04264	CON__P04264	CON__P04264	MULTI-MSMS	20140904-PurClathDigest-1ug-01	1	1192.97	2	1192.47956	2382.94457	19382.41	-8.2293	-0.0098133	1.4774	0.0017617	-6.752	-0.0080516	1192.98293618442	34.541	0.50442	34.541	34.369	34.874	3.8147E-06					51	15	5	0	0	0	0.01019	1	3635	102.03
GGGGGGYGSGGSSYGSGGGSYGSGGGGGGGR	31	Unmodified	_GGGGGGYGSGGSSYGSGGGSYGSGGGGGGGR_					0	0	0	0	CON__P04264	CON__P04264	CON__P04264	MULTI-MSMS	20140904-PurClathDigest-1ug-02	2	1192.97	2	1192.47956	2382.94457	19538.91	-7.8454	-0.0093555	0.65596	0.00078221	-7.1894	-0.0085733	1192.98207454136	34.89	0.48525	34.89	34.718	35.204	-3.8147E-06					50	13	6	0	0	0	1.1484E-10	1	3350	172.06
GGGGGGYGSGGSSYGSGGGSYGSGGGGGGGR	31	Unmodified	_GGGGGGYGSGGSSYGSGGGSYGSGGGGGGGR_					0	0	0	0	CON__P04264	CON__P04264	CON__P04264	MULTI-MSMS	20140904-PurClathDigest-1ug-03	3	1192.97	2	1192.47956	2382.94457	19335.88	-7.6086	-0.0090731	0.40054	0.00047764	-7.2081	-0.0085955	1192.98159150685	34.819	0.46209	34.819	34.619	35.081	0					53	13	6	0	0	0	3.2174E-10	1	3163	140.04
GGGGSFGYSYGGGSGGGFSASSLGGGFGGGSR	32	Unmodified	_GGGGSFGYSYGGGSGGGFSASSLGGGFGGGSR_					0	0	0	0	CON__P35527	CON__P35527	CON__P35527	MULTI-MSMS	20140904-PurClathDigest-1ug-02	2	1353.58	2	1353.08419	2704.15383	17926.46	-4.9419	-0.0066868	0.19938	0.00026977	-4.7425	-0.006417	1353.5855225108	47.756	0.49334	47.756	47.571	48.064	0					43	14	6	0	0	0	0.013937	1	6515	90.363
GGQVQIVTK	9	Unmodified	_GGQVQIVTK_					0	0	0	0	F1MEW3	F1MEW3	F1MEW3	MULTI-MSMS	20140904-PurClathDigest-1ug-01	1	465.27	2	465.274367	928.53418	30498.65	-6.3241	-0.0029424	0.62955	0.00029291	-5.6946	-0.0026495	465.274667094028	34.201	0.60683	34.201	34.075	34.682	0					42	19	4	0	0	0	0.0015964	1	3549	120.76
GGQVQIVTK	9	Unmodified	_GGQVQIVTK_					0	0	0	0	F1MEW3	F1MEW3	F1MEW3	MULTI-MSMS	20140904-PurClathDigest-1ug-02	2	465.27	2	465.274367	928.53418	30556.74	-6.4371	-0.002995	1.1808	0.00054937	-5.2563	-0.0024456	465.274921705589	34.503	0.67342	34.503	34.357	35.031	0					45	19	5	0	0	0	0.0037442	1	3258	114.51
GGQVQIVTK	9	Unmodified	_GGQVQIVTK_					0	0	0	0	F1MEW3	F1MEW3	F1MEW3	MULTI-MSMS	20140904-PurClathDigest-1ug-03	3	465.27	2	465.274367	928.53418	30717.86	-6.3397	-0.0029497	0.74485	0.00034656	-5.5948	-0.0026031	465.274722230879	34.554	0.35917	34.554	34.42	34.779	0					32	10	5	0	0	0	0.00049834	1	3100	126.55
GGSGGGGSISGGGYGSGGGSGGR	23	Unmodified	_GGSGGGGSISGGGYGSGGGSGGR_					0	0	0	0	CON__P35908	CON__P35908	CON__P35908	MULTI-MSMS	20140904-PurClathDigest-1ug-01	1	871.37	2	871.37786	1740.74117	22468.82	-5.9913	-0.0052207	-0.0088966	-7.7523E-06	-6.0002	-0.0052285	871.378216640861	33.078	0.40542	33.078	32.926	33.331	0					32	12	4	0	0	0	4.0374E-05	1	3268	98.3
GGSGGGGSISGGGYGSGGGSGGR	23	Unmodified	_GGSGGGGSISGGGYGSGGGSGGR_					0	0	0	0	CON__P35908	CON__P35908	CON__P35908	MULTI-MSMS	20140904-PurClathDigest-1ug-03	3	871.37	2	871.37786	1740.74117	22807.03	-5.9195	-0.0051581	0.90988	0.00079285	-5.0096	-0.0043652	871.378725464336	33.341	0.50525	33.341	33.139	33.644	0					39	12	5	0	0	0	2.6042E-05	1	2837	114.39
GGSGGSYGGGGSGGGYGGGSGSR	23	Unmodified	_GGSGGSYGGGGSGGGYGGGSGSR_					0	0	0	0	CON__P35527	CON__P35527	CON__P35527	MULTI-MSMS	20140904-PurClathDigest-1ug-01	1	896.36	2	896.367492	1790.72043	22421.37	-6.1288	-0.0054936	-0.13068	-0.00011714	-6.2595	-0.0056108	896.367599278611	32.478	0.80742	32.478	32.339	33.147	0					44	25	5	0	0	0	1.2925E-08	1	3108	147.35
GGSGGSYGGGGSGGGYGGGSGSR	23	Unmodified	_GGSGGSYGGGGSGGGYGGGSGSR_					0	0	0	0	CON__P35527	CON__P35527	CON__P35527	MULTI-MSMS	20140904-PurClathDigest-1ug-02	2	896.36	2	896.367492	1790.72043	22428.34	-5.3344	-0.0047816	-0.67904	-0.00060867	-6.0135	-0.0053903	896.367064864623	32.613	0.363	32.613	32.465	32.828	0					42	10	6	0	0	0	7.0907E-06	1	2827	126.04
GGSGGSYGGGGSGGGYGGGSGSR	23	Unmodified	_GGSGGSYGGGGSGGGYGGGSGSR_					0	0	0	0	CON__P35527	CON__P35527	CON__P35527	MULTI-MSMS	20140904-PurClathDigest-1ug-03	3	896.36	2	896.367492	1790.72043	22552.24	-6.154	-0.0055162	0.32799	0.000294	-5.826	-0.0052222	896.368050983316	32.71	0.95467	32.71	32.542	33.497	0					55	25	6	0	0	0	2.8258E-28	1	2686	243.99
GGSISGGGYGSGGGK	15	Unmodified	_GGSISGGGYGSGGGK_					0	0	0	0	CON__P35908	CON__P35908	CON__P35908	MULTI-MSMS	20140904-PurClathDigest-1ug-02	2	599.27	2	599.278366	1196.54218	27162.48	-6.3451	-0.0038025	-0.23284	-0.00013954	-6.5779	-0.003942	599.278172489663	32.619	0.33008	32.619	32.465	32.795	3.8147E-06					26	9	4	0	0	0	0.014097	1	2845	79.804
GGSISGGGYGSGGGK	15	Unmodified	_GGSISGGGYGSGGGK_					0	0	0	0	CON__P35908	CON__P35908	CON__P35908	MULTI-MSMS	20140904-PurClathDigest-1ug-03	3	599.27	2	599.278366	1196.54218	27634.91	-6.6034	-0.0039573	0.29793	0.00017855	-6.3055	-0.0037788	599.278584592388	32.703	0.30825	32.703	32.542	32.851	0					25	8	4	0	0	0	0.024914	1	2701	70.47
GGSSSGGGYGSGGGGSSSVK	20	Unmodified	_GGSSSGGGYGSGGGGSSSVK_					0	0	0	0	CON__P35908	CON__P35908	CON__P35908	MULTI-SECPEP	20140904-PurClathDigest-1ug-01	1	794.78	2	794.84533	1587.67611	23305.29	-5.5846	-0.0044389	0.58477	0.0004648	-4.9998	-0.0039741	794.845490363641	31.23	0.17125	31.23	31.109	31.28	0					13	4	4	0	0	0	0.00096503	1	2790	101.74
GGSSSGGGYGSGGGGSSSVK	20	Unmodified	_GGSSSGGGYGSGGGGSSSVK_					0	0	0	0	CON__P35908	CON__P35908	CON__P35908	MULTI-SECPEP	20140904-PurClathDigest-1ug-03	3	794.78	2	794.84533	1587.67611	23697.68	-4.4116	-0.0035065	1.057	0.00084012	-3.3546	-0.0026664	795.348492626396	31.239	0.21717	31.239	31.107	31.324	0					14	4	5	0	0	0	3.0566E-12	1	2381	170.38
GHEFSIPFVEMK	12	Oxidation (M)	_GHEFSIPFVEM(ox)K_		GHEFSIPFVEM(1)K		GHEFSIPFVEM(168.98)K	0	0	1	0	E1BKN2	E1BKN2	E1BKN2	MULTI-MSMS	20140904-PurClathDigest-1ug-01	1	718.85	2	718.84757	1435.68059	24845.1	-3.5371	-0.0025426	0.50479	0.00036287	-3.0323	-0.0021798	718.848675847009	45.676	0.63125	45.676	45.309	45.94	0					49	20	5	0	0	0	4.2756E-06	1	6550	168.98
GHEFSIPFVEMK	12	Oxidation (M)	_GHEFSIPFVEM(ox)K_		GHEFSIPFVEM(1)K		GHEFSIPFVEM(144.57)K	0	0	1	0	E1BKN2	E1BKN2	E1BKN2	MULTI-MSMS	20140904-PurClathDigest-1ug-02	2	718.85	2	718.84757	1435.68059	25033.71	-3.5441	-0.0025477	1.0423	0.00074929	-2.5018	-0.0017984	718.848601211166	46.192	0.651	46.192	45.857	46.508	0					42	20	4	0	0	0	0.00016735	1	6134	144.57
GHYTEGAELVDAVLDVVR	18	Unmodified	_GHYTEGAELVDAVLDVVR_					0	0	0	0	Q3ZBU7	Q3ZBU7	Q3ZBU7	MULTI-MSMS	20140904-PurClathDigest-1ug-01	1	648.33	3	648.333812	1941.97961	25527.48	-0.5888	-0.00038174	-0.51161	-0.0003317	-1.1004	-0.00071343	648.333311558104	55.628	0.62417	55.628	55.352	55.977	0					55	16	5	0	0	0	7.0863E-13	1	9110	162.79
GHYTEGAELVDAVLDVVR	18	Unmodified	_GHYTEGAELVDAVLDVVR_					0	0	0	0	Q3ZBU7	Q3ZBU7	Q3ZBU7	MULTI-MSMS	20140904-PurClathDigest-1ug-02	2	648.67	3	648.333812	1941.97961	24946.34	-1.3106	-0.0008497	0.39186	0.00025406	-0.91873	-0.00059564	648.333696495189	56.169	0.60375	56.169	55.864	56.468	0					39	13	5	0	0	0	2.7141E-08	1	8472	129.05
GHYTEGAELVDAVLDVVR	18	Unmodified	_GHYTEGAELVDAVLDVVR_					0	0	0	0	Q3ZBU7	Q3ZBU7	Q3ZBU7	MULTI-MSMS	20140904-PurClathDigest-1ug-03	3	648.33	3	648.333812	1941.97961	25652.62	-1.5644	-0.0010142	-1.7638	-0.0011436	-3.3282	-0.0021578	648.666753048982	56.144	0.6635	56.144	55.902	56.565	0					33	12	5	0	0	0	6.0908E-09	1	8188	149
GHYTEGAELVDAVLDVVRK	19	Unmodified	_GHYTEGAELVDAVLDVVRK_					0	0	0	1	Q3ZBU7	Q3ZBU7	Q3ZBU7	MULTI-MSMS	20140904-PurClathDigest-1ug-01	1	691.03	3	691.032133	2070.07457	25125.86	-1.7794	-0.0012296	-0.27915	-0.0001929	-2.0585	-0.0014225	691.366077630273	52.982	0.306	52.982	52.816	53.122	0					28	9	5	0	0	0	2.2796E-18	1	8458	205.12
GHYTEGAELVDAVLDVVRK	19	Unmodified	_GHYTEGAELVDAVLDVVRK_					0	0	0	1	Q3ZBU7	Q3ZBU7	Q3ZBU7	MULTI-MSMS	20140904-PurClathDigest-1ug-02	2	691.36	3	691.032133	2070.07457	25751.6	-2.7012	-0.0018666	-0.20879	-0.00014428	-2.91	-0.0020109	691.36673458122	53.231	0.41083	53.231	52.941	53.352	0					30	11	5	0	0	0	3.0301E-13	1	7846	164.48
GHYTEGAELVDAVLDVVRK	19	Unmodified	_GHYTEGAELVDAVLDVVRK_					0	0	0	1	Q3ZBU7	Q3ZBU7	Q3ZBU7	MULTI-MSMS	20140904-PurClathDigest-1ug-03	3	691.36	3	691.032133	2070.07457	25903.15	-2.5945	-0.0017929	-0.39133	-0.00027042	-2.9858	-0.0020633	691.366227491835	53.289	0.39275	53.289	53.038	53.431	3.8147E-06					32	10	5	0	0	0	1.8896E-13	1	7582	181.69
GHYTEGAELVDSVLDVVR	18	Unmodified	_GHYTEGAELVDSVLDVVR_					0	0	0	0	Q2KJD0;Q3MHM5;G3X7R8;Q2HJ81;E1BJB1;Q6B856;G3X7R7;G3N1W7;Q2T9S0	Q2KJD0;Q3MHM5;E1BJB1;Q2T9S0	Q3MHM5	MULTI-MSMS	20140904-PurClathDigest-1ug-01	1	654	3	653.66545	1957.97452	26126.57	-2.0354	-0.0013305	0.17972	0.00011748	-1.8557	-0.001213	653.665708069022	52.989	0.27641	52.989	52.876	53.153	0					33	8	6	0	0	0	2.7521E-06	1	8456	123.02
GHYTEGAELVDSVLDVVR	18	Unmodified	_GHYTEGAELVDSVLDVVR_					0	0	0	0	Q2KJD0;Q3MHM5;G3X7R8;Q2HJ81;E1BJB1;Q6B856;G3X7R7;G3N1W7;Q2T9S0	Q2KJD0;Q3MHM5;E1BJB1;Q2T9S0	Q3MHM5	MULTI-MSMS	20140904-PurClathDigest-1ug-01	1	980.49	2	979.994537	1957.97452	21739.41	-1.8128	-0.0017765	-1.7147	-0.0016804	-3.5275	-0.0034569	979.992136609227	52.989	0.33591	52.989	52.786	53.122	0					30	10	5	0	0	0	2.0305E-21	1	8457	216.19
GHYTEGAELVDSVLDVVR	18	Unmodified	_GHYTEGAELVDSVLDVVR_					0	0	0	0	Q2KJD0;Q3MHM5;G3X7R8;Q2HJ81;E1BJB1;Q6B856;G3X7R7;G3N1W7;Q2T9S0	Q2KJD0;Q3MHM5;E1BJB1;Q2T9S0	Q3MHM5	MULTI-MSMS	20140904-PurClathDigest-1ug-02	2	654	3	653.66545	1957.97452	26475.55	-2.6733	-0.0017475	-0.15833	-0.0001035	-2.8317	-0.001851	653.999641669832	53.23	0.30099	53.23	53.084	53.385	0					32	8	6	0	0	0	6.1691E-18	1	7839	192.78
GHYTEGAELVDSVLDVVR	18	Unmodified	_GHYTEGAELVDSVLDVVR_					0	0	0	0	Q2KJD0;Q3MHM5;G3X7R8;Q2HJ81;E1BJB1;Q6B856;G3X7R7;G3N1W7;Q2T9S0	Q2KJD0;Q3MHM5;E1BJB1;Q2T9S0	Q3MHM5	MULTI-MSMS	20140904-PurClathDigest-1ug-02	2	980.49	2	979.994537	1957.97452	21322.81	-2.9785	-0.0029189	-1.9982	-0.0019582	-4.9767	-0.0048771	979.991989704651	53.23	0.26575	53.23	53.119	53.385	0					24	7	5	0	0	0	3.809E-27	1	7844	246.95
GHYTEGAELVDSVLDVVR	18	Unmodified	_GHYTEGAELVDSVLDVVR_					0	0	0	0	Q2KJD0;Q3MHM5;G3X7R8;Q2HJ81;E1BJB1;Q6B856;G3X7R7;G3N1W7;Q2T9S0	Q2KJD0;Q3MHM5;E1BJB1;Q2T9S0	Q3MHM5	MULTI-MSMS	20140904-PurClathDigest-1ug-03	3	653.66	3	653.66545	1957.97452	26384.07	-2.5362	-0.0016579	-0.025647	-1.6764E-05	-2.5619	-0.0016746	653.999708476982	53.29	0.27791	53.29	53.153	53.431	3.8147E-06					33	7	5	0	0	0	2.5722E-08	1	7569	130.02
GHYTEGAELVDSVLDVVR	18	Unmodified	_GHYTEGAELVDSVLDVVR_					0	0	0	0	Q2KJD0;Q3MHM5;G3X7R8;Q2HJ81;E1BJB1;Q6B856;G3X7R7;G3N1W7;Q2T9S0	Q2KJD0;Q3MHM5;E1BJB1;Q2T9S0	Q3MHM5	MULTI-MSMS	20140904-PurClathDigest-1ug-03	3	980.49	2	979.994537	1957.97452	21540.22	-2.4681	-0.0024187	-2.762	-0.0027068	-5.2302	-0.0051255	980.492745097226	53.29	0.27791	53.29	53.153	53.431	-3.8147E-06					20	7	4	0	0	0	2.3011E-17	1	7578	206.8
GHYTEGAELVDSVLDVVRK	19	Unmodified	_GHYTEGAELVDSVLDVVRK_					0	0	0	1	Q2KJD0;Q3MHM5;G3X7R8;Q2HJ81;E1BJB1;Q6B856;G3X7R7;G3N1W7;Q2T9S0	Q2KJD0;Q3MHM5;E1BJB1;Q2T9S0	Q3MHM5	MULTI-MSMS	20140904-PurClathDigest-1ug-01	1	696.7	3	696.363771	2086.06948	25052.26	-2.2224	-0.0015476	0.78008	0.00054322	-1.4423	-0.0010044	696.364400055359	51.167	0.58083	51.167	50.901	51.482	0					74	17	6	0	0	0	4.4856E-18	2	7965	192.32
GHYTEGAELVDSVLDVVRK	19	Unmodified	_GHYTEGAELVDSVLDVVRK_					0	0	0	1	Q2KJD0;Q3MHM5;G3X7R8;Q2HJ81;E1BJB1;Q6B856;G3X7R7;G3N1W7;Q2T9S0	Q2KJD0;Q3MHM5;E1BJB1;Q2T9S0	Q3MHM5	MULTI-MSMS	20140904-PurClathDigest-1ug-02	2	696.36	3	696.363771	2086.06948	25214.91	-2.1205	-0.0014766	0.62765	0.00043707	-1.4929	-0.0010396	696.698427000924	51.397	0.38542	51.397	51.212	51.597	0					50	11	6	0	0	0	3.6407E-22	1	7397	225.13
GHYTEGAELVDSVLDVVRK	19	Unmodified	_GHYTEGAELVDSVLDVVRK_					0	0	0	1	Q2KJD0;Q3MHM5;G3X7R8;Q2HJ81;E1BJB1;Q6B856;G3X7R7;G3N1W7;Q2T9S0	Q2KJD0;Q3MHM5;E1BJB1;Q2T9S0	Q3MHM5	MULTI-MSMS	20140904-PurClathDigest-1ug-03	3	696.7	3	696.363771	2086.06948	25031.64	-2.4235	-0.0016876	0.69505	0.00048401	-1.7284	-0.0012036	696.698364868602	51.47	0.38917	51.47	51.27	51.659	0					47	11	6	0	0	0	9.0372E-10	1	7139	153.75
GHYTIGK	7	Unmodified	_GHYTIGK_					0	0	0	0	Q2HJ86;F2Z4C1;F6RP72;F2Z4K0;Q32KN8;Q3ZCJ7;F1MNF8	Q2HJ86	Q2HJ86	MULTI-MSMS	20140904-PurClathDigest-1ug-01	1	388.21	2	388.208495	774.402438	33507.84	-7.2422	-0.0028115	0.53716	0.00020853	-6.705	-0.0026029	388.208657133531	31.791	0.34925	31.791	31.652	32.001	0					21	10	3	0	0	0	0.0034265	1	2930	151.17
GHYTIGK	7	Unmodified	_GHYTIGK_					0	0	0	0	Q2HJ86;F2Z4C1;F6RP72;F2Z4K0;Q32KN8;Q3ZCJ7;F1MNF8	Q2HJ86	Q2HJ86	MULTI-MSMS	20140904-PurClathDigest-1ug-02	2	388.21	2	388.208495	774.402438	33534.45	-7.127	-0.0027668	0.36323	0.00014101	-6.7638	-0.0026258	388.208614741857	31.846	0.39125	31.846	31.698	32.089	1.9073E-06					24	10	4	0	0	0	0.0034265	1	2659	151.17
GHYTIGK	7	Unmodified	_GHYTIGK_					0	0	0	0	Q2HJ86;F2Z4C1;F6RP72;F2Z4K0;Q32KN8;Q3ZCJ7;F1MNF8	Q2HJ86	Q2HJ86	MULTI-MSMS	20140904-PurClathDigest-1ug-03	3	388.21	2	388.208495	774.402438	33981.95	-7.3699	-0.0028611	0.77876	0.00030232	-6.5911	-0.0025587	388.208705296234	31.924	0.31158	31.924	31.798	32.11	1.9073E-06					19	7	4	0	0	0	0.002764	1	2523	158.12
GIDLTQVK	8	Unmodified	_GIDLTQVK_					0	0	0	0	F1N690;F1N4X1	F1N690	F1N690	MULTI-MSMS	20140904-PurClathDigest-1ug-01	1	437.25	2	437.255643	872.496732	31339.3	-5.3775	-0.0023514	-0.20604	-9.0093E-05	-5.5836	-0.0024415	437.25556509258	39.996	0.30216	39.996	39.824	40.126	0					21	9	3	0	0	0	0.01407	1	5052	95.741
GLDFSDR	7	Unmodified	_GLDFSDR_					0	0	0	0	Q3ZCF0	Q3ZCF0	Q3ZCF0	MULTI-SECPEP	20140904-PurClathDigest-1ug-01	1	405.22	2	405.193042	808.371532	32824.45	-4.9642	-0.0020115	-0.48494	-0.0001965	-5.4491	-0.002208	405.192754927737	39.431	0.30375	39.431	39.275	39.579	0					23	9	3	0	0	0	0.040045	1	4888	86.872
GLEPGQEYSILLTAEK	16	Unmodified	_GLEPGQEYSILLTAEK_					0	0	0	0	F1MRZ5;F1MRZ6	F1MRZ5	F1MRZ5	MULTI-MSMS	20140904-PurClathDigest-1ug-02	2	874.96	2	874.459267	1746.90398	22976.47	-2.8166	-0.002463	0.74572	0.0006521	-2.0709	-0.0018109	874.96158584015	49.23	0.38175	49.23	49.055	49.437	0					36	10	5	0	0	0	0.0011704	1	6884	87.429
GLEPGQEYSILLTAEK	16	Unmodified	_GLEPGQEYSILLTAEK_					0	0	0	0	F1MRZ5;F1MRZ6	F1MRZ5	F1MRZ5	MULTI-MSMS	20140904-PurClathDigest-1ug-03	3	874.46	2	874.459267	1746.90398	22151.39	-2.9878	-0.0026127	0.77751	0.0006799	-2.2103	-0.0019328	874.459669778745	49.427	0.55142	49.427	49.229	49.78	0					35	15	4	0	0	0	4.6427E-05	1	6662	117
GLETIANDVVSLATK	15	Unmodified	_GLETIANDVVSLATK_					0	0	0	0	F1N690	F1N690	F1N690	MULTI-MSMS	20140904-PurClathDigest-1ug-01	1	765.92	2	765.92232	1529.83009	24144.25	-2.5951	-0.0019877	0.99775	0.0007642	-1.5974	-0.0012235	765.92325281	54.492	0.46633	54.492	54.314	54.78	0					39	14	4	0	0	0	9.4037E-08	1	8835	147.12
GLETIANDVVSLATK	15	Unmodified	_GLETIANDVVSLATK_					0	0	0	0	F1N690	F1N690	F1N690	MULTI-MSMS	20140904-PurClathDigest-1ug-02	2	765.92	2	765.92232	1529.83009	24176.9	-2.3106	-0.0017697	0.83437	0.00063906	-1.4762	-0.0011307	765.923011821596	54.974	0.59091	54.974	54.788	55.379	0					36	15	4	0	0	0	4.5989E-11	1	8215	189.1
GLETIANDVVSLATK	15	Unmodified	_GLETIANDVVSLATK_					0	0	0	0	F1N690	F1N690	F1N690	MULTI-MSMS	20140904-PurClathDigest-1ug-03	3	765.92	2	765.92232	1529.83009	23853.59	-2.2096	-0.0016924	0.35225	0.0002698	-1.8573	-0.0014226	765.922700495904	55.029	0.41492	55.029	54.85	55.265	-3.8147E-06					31	10	4	0	0	0	1.0915E-07	1	7945	144.29
GLSSVPEVAEVEPSK	15	Unmodified	_GLSSVPEVAEVEPSK_					0	0	0	0	F1MEW3	F1MEW3	F1MEW3	MULTI-MSMS	20140904-PurClathDigest-1ug-01	1	764.39	2	764.398678	1526.7828	24088.43	-5.0699	-0.0038754	0.35717	0.00027302	-4.7127	-0.0036024	764.398769214267	42.049	0.69592	42.049	41.695	42.391	-3.8147E-06					75	22	5	0	0	0	0.0020595	2	5547	85.493
GLSSVPEVAEVEPSK	15	Unmodified	_GLSSVPEVAEVEPSK_					0	0	0	0	F1MEW3	F1MEW3	F1MEW3	MULTI-MSMS	20140904-PurClathDigest-1ug-02	2	764.4	2	764.398678	1526.7828	24237.96	-4.6164	-0.0035288	-0.3864	-0.00029537	-5.0028	-0.0038241	764.398335548877	42.168	0.70025	42.168	41.864	42.564	0					71	21	5	0	0	0	0.0042064	1	5132	74.89
GLSSVPEVAEVEPSK	15	Unmodified	_GLSSVPEVAEVEPSK_					0	0	0	0	F1MEW3	F1MEW3	F1MEW3	MULTI-MSMS	20140904-PurClathDigest-1ug-03	3	764.39	2	764.398678	1526.7828	24187.43	-5.6291	-0.0043029	-0.015847	-1.2113E-05	-5.645	-0.004315	764.398667703693	42.231	0.94075	42.231	41.861	42.802	0					83	27	5	0	0	0	0.015021	1	4905	71.08
GLSSVPEVAEVEPSKK	16	Unmodified	_GLSSVPEVAEVEPSKK_					0	0	0	1	F1MEW3	F1MEW3	F1MEW3	MULTI-MSMS	20140904-PurClathDigest-1ug-01	1	828.94	2	828.44616	1654.87777	22993.71	-4.9654	-0.0041136	0.46717	0.00038703	-4.4983	-0.0037266	828.446602399536	39.746	0.69608	39.746	39.4	40.096	-3.8147E-06					82	22	6	0	0	0	0.056737	1	4958	83.54
GLSSVPEVAEVEPSKK	16	Unmodified	_GLSSVPEVAEVEPSKK_					0	0	0	1	F1MEW3	F1MEW3	F1MEW3	MULTI-MSMS	20140904-PurClathDigest-1ug-01	1	552.63	3	552.633199	1654.87777	28720.85	-4.8482	-0.0026793	0.32867	0.00018163	-4.5196	-0.0024977	552.633380406496	39.745	0.63542	39.745	39.368	40.004	0					79	20	6	0	0	0	0.061213	1	4965	35.473
GLSSVPEVAEVEPSKK	16	Unmodified	_GLSSVPEVAEVEPSKK_					0	0	0	1	F1MEW3	F1MEW3	F1MEW3	MULTI-MSMS	20140904-PurClathDigest-1ug-02	2	828.44	2	828.44616	1654.87777	23672.67	-4.3999	-0.003645	0.37615	0.00031162	-4.0237	-0.0033334	828.446597461526	40.148	0.65925	40.148	39.782	40.441	0					70	19	5	0	0	0	0.0066311	1	4583	108.63
GLSSVPEVAEVEPSKK	16	Unmodified	_GLSSVPEVAEVEPSKK_					0	0	0	1	F1MEW3	F1MEW3	F1MEW3	MULTI-MSMS	20140904-PurClathDigest-1ug-03	3	828.44	2	828.44616	1654.87777	22910.22	-4.2059	-0.0034844	-0.22598	-0.00018721	-4.4319	-0.0036716	828.446086252912	40.155	0.68042	40.155	39.784	40.464	0					70	19	6	0	0	0	0.0084687	1	4366	100.23
GLVSSDELAK	10	Unmodified	_GLVSSDELAK_					0	0	0	0	E1BFB0	E1BFB0	E1BFB0	MULTI-MSMS	20140904-PurClathDigest-1ug-01	1	509.77	2	509.774396	1017.53424	29660.76	-5.6832	-0.0028971	0.0091539	4.6664E-06	-5.674	-0.0028925	509.774304968206	38.457	0.36992	38.457	38.268	38.637	0					26	11	3	0	0	0	0.024828	1	4636	85.29
GLVSSDELAK	10	Unmodified	_GLVSSDELAK_					0	0	0	0	E1BFB0	E1BFB0	E1BFB0	MULTI-MSMS	20140904-PurClathDigest-1ug-02	2	509.77	2	509.774396	1017.53424	29294.61	-5.5085	-0.0028081	0.22188	0.00011311	-5.2867	-0.002695	509.774389942068	38.681	0.38533	38.681	38.509	38.895	3.8147E-06					27	10	4	0	0	0	0.039709	1	4247	76.282
GLVSSDELAK	10	Unmodified	_GLVSSDELAK_					0	0	0	0	E1BFB0	E1BFB0	E1BFB0	MULTI-MSMS	20140904-PurClathDigest-1ug-03	3	509.77	2	509.774396	1017.53424	29810.65	-4.9383	-0.0025174	0.59202	0.0003018	-4.3463	-0.0022156	509.774675183157	38.847	0.33225	38.847	38.676	39.009	3.8147E-06					22	8	4	0	0	0	0.027177	1	4067	83.869
GMIKEESVQIK	11	Oxidation (M)	_GM(ox)IKEESVQIK_		GM(1)IKEESVQIK		GM(138.45)IKEESVQIK	0	0	1	1	F1MEW3	F1MEW3	F1MEW3	MULTI-MSMS	20140904-PurClathDigest-1ug-01	1	639.34	2	639.34212	1276.66969	26468.73	-6.0996	-0.0038997	-0.15706	-0.00010041	-6.2566	-0.0040001	639.342256391844	34.296	0.57983	34.296	34.164	34.744	0					56	18	6	0	0	0	0.0010067	1	3569	138.45
GMIKEESVQIK	11	Oxidation (M)	_GM(ox)IKEESVQIK_		GM(1)IKEESVQIK		GM(82.5)IKEESVQIK	0	0	1	1	F1MEW3	F1MEW3	F1MEW3	MULTI-MSMS	20140904-PurClathDigest-1ug-01	1	426.56	3	426.563839	1276.66969	32427.52	-6.3272	-0.0026989	0.70378	0.00030021	-5.6234	-0.0023987	426.564294416006	34.289	0.35783	34.289	34.135	34.493	-3.8147E-06					34	11	5	0	0	0	0.031089	1	3571	82.505
GMIKEESVQIK	11	Oxidation (M)	_GM(ox)IKEESVQIK_		GM(1)IKEESVQIK		GM(164.9)IKEESVQIK	0	0	1	1	F1MEW3	F1MEW3	F1MEW3	MULTI-MSMS	20140904-PurClathDigest-1ug-02	2	639.34	2	639.34212	1276.66969	26464.95	-6.0791	-0.0038866	-0.86586	-0.00055358	-6.945	-0.0044402	639.341728509785	34.624	0.57042	34.624	34.493	35.064	0					52	16	6	0	0	0	7.1164E-05	1	3291	164.9
GMIKEESVQIK	11	Oxidation (M)	_GM(ox)IKEESVQIK_		GM(1)IKEESVQIK		GM(84.48)IKEESVQIK	0	0	1	1	F1MEW3	F1MEW3	F1MEW3	MULTI-MSMS	20140904-PurClathDigest-1ug-02	2	426.56	3	426.563839	1276.66969	32273.3	-6.4958	-0.0027709	0.14299	6.0993E-05	-6.3528	-0.0027099	426.564034158505	34.618	0.39017	34.618	34.43	34.82	0					33	11	4	0	0	0	0.028217	1	3293	84.479
GMIKEESVQIK	11	Oxidation (M)	_GM(ox)IKEESVQIK_		GM(1)IKEESVQIK		GM(158.3)IKEESVQIK	0	0	1	1	F1MEW3	F1MEW3	F1MEW3	MULTI-MSMS	20140904-PurClathDigest-1ug-03	3	639.34	2	639.34212	1276.66969	25817.91	-6.4018	-0.0040929	-0.35364	-0.0002261	-6.7554	-0.004319	639.342090149628	34.647	0.49367	34.647	34.488	34.982	0					46	14	5	0	0	0	7.1164E-05	1	3113	158.3
GMIKEESVQIK	11	Oxidation (M)	_GM(ox)IKEESVQIK_		GM(1)IKEESVQIK		GM(84.51)IKEESVQIK	0	0	1	1	F1MEW3	F1MEW3	F1MEW3	MULTI-MSMS	20140904-PurClathDigest-1ug-03	3	426.56	3	426.563839	1276.66969	32191.08	-6.6418	-0.0028332	0.5654	0.00024118	-6.0764	-0.002592	426.564227950702	34.637	0.35859	34.637	34.488	34.847	-3.8147E-06					33	10	5	0	0	0	0.028176	1	3121	84.507
GNAMVEEGHFAAEDVK	16	Oxidation (M)	_GNAM(ox)VEEGHFAAEDVK_		GNAM(1)VEEGHFAAEDVK		GNAM(111.77)VEEGHFAAEDVK	0	0	1	0	E1BFB0	E1BFB0	E1BFB0	MULTI-MSMS	20140904-PurClathDigest-1ug-01	1	860.38	2	860.385776	1718.757	23038.2	-4.6882	-0.0040336	-1.1757	-0.0010116	-5.8639	-0.0050452	860.384769985682	37.053	0.49342	37.053	36.881	37.374	0					43	15	5	0	0	0	0.0011107	1	4269	111.77
GNAMVEEGHFAAEDVK	16	Oxidation (M)	_GNAM(ox)VEEGHFAAEDVK_		GNAM(1)VEEGHFAAEDVK		GNAM(89.36)VEEGHFAAEDVK	0	0	1	0	E1BFB0	E1BFB0	E1BFB0	MULTI-MSMS	20140904-PurClathDigest-1ug-01	1	573.92	3	573.926276	1718.757	27921.02	-5.3272	-0.0030574	-1.0336	-0.00059322	-6.3608	-0.0036507	573.92566877402	37.054	0.43209	37.054	36.881	37.313	0					47	13	5	0	0	0	0.0010137	1	4270	89.358
GNAMVEEGHFAAEDVK	16	Oxidation (M)	_GNAM(ox)VEEGHFAAEDVK_		GNAM(1)VEEGHFAAEDVK		GNAM(80.74)VEEGHFAAEDVK	0	0	1	0	E1BFB0	E1BFB0	E1BFB0	MULTI-MSMS	20140904-PurClathDigest-1ug-03	3	573.92	3	573.926276	1718.757	27868.81	-5.1522	-0.002957	-0.81295	-0.00046657	-5.9652	-0.0034236	573.925870385747	37.201	0.55517	37.201	36.999	37.554	0					56	14	6	0	0	0	0.0035764	1	3700	80.738
GNAMVEEGHFAAEDVK	16	Oxidation (M)	_GNAM(ox)VEEGHFAAEDVK_		GNAM(1)VEEGHFAAEDVK		GNAM(102.89)VEEGHFAAEDVK	0	0	1	0	E1BFB0	E1BFB0	E1BFB0	MULTI-MSMS	20140904-PurClathDigest-1ug-03	3	860.38	2	860.385776	1718.757	22731.15	-5.1413	-0.0044235	0.11714	0.00010078	-5.0242	-0.0043227	860.385808987758	37.189	0.4	37.189	36.999	37.399	0					35	10	5	0	0	0	0.0011107	1	3710	102.89
GPAAIQK	7	Unmodified	_GPAAIQK_					0	0	0	0	CON__P35527	CON__P35527	CON__P35527	MULTI-MSMS	20140904-PurClathDigest-1ug-02	2	342.7	2	342.705589	683.396624	35056.59	-5.3226	-0.0018241	0.51645	0.00017699	-4.8061	-0.0016471	342.705579627209	30.91	0.31025	30.91	30.773	31.084	0					16	8	3	0	0	0	0.020526	1	2456	96.666
GPGLGSTQGQTIALPAQGLIEFR	23	Unmodified	_GPGLGSTQGQTIALPAQGLIEFR_					0	0	0	0	E1BMW9	E1BMW9	E1BMW9	MULTI-MSMS	20140904-PurClathDigest-1ug-02	2	1156.63	2	1156.12387	2310.23319	19442.12	-2.1499	-0.0024856	0.20307	0.00023478	-1.9468	-0.0022508	1156.626659053	51.732	0.29141	51.732	51.597	51.889	0					27	8	4	0	0	0	3.8845E-09	1	7504	140.73
GPLIQAEDTALHLAPVSIPEAR	22	Unmodified	_GPLIQAEDTALHLAPVSIPEAR_					0	0	0	0	F1N3M8;G3MYP5	F1N3M8;G3MYP5	G3MYP5	MULTI-MSMS	20140904-PurClathDigest-1ug-01	1	767.09	3	766.753258	2297.23795	24178.82	-2.388	-0.001831	0.35779	0.00027433	-2.0302	-0.0015567	767.087916824303	49.706	1.0609	49.706	49.027	50.088	0					148	34	7	0	0	0	0.013975	2	7566	57.484
GPLIQAEDTALHLAPVSIPEAR	22	Unmodified	_GPLIQAEDTALHLAPVSIPEAR_					0	0	0	0	F1N3M8;G3MYP5	F1N3M8;G3MYP5	G3MYP5	MULTI-MSMS	20140904-PurClathDigest-1ug-01	1	1150.12	2	1149.62625	2297.23795	19445.59	-2.7992	-0.003218	-0.39185	-0.00045048	-3.191	-0.0036685	1150.12738660169	49.715	0.72558	49.715	49.179	49.905	0					74	23	5	0	0	0	9.4422E-19	1	7629	205.02
GPLIQAEDTALHLAPVSIPEAR	22	Unmodified	_GPLIQAEDTALHLAPVSIPEAR_					0	0	0	0	F1N3M8;G3MYP5	F1N3M8;G3MYP5	G3MYP5	MULTI-MSMS	20140904-PurClathDigest-1ug-02	2	767.09	3	766.753258	2297.23795	24216.92	-2.3433	-0.0017967	0.38743	0.00029707	-1.9558	-0.0014996	767.087779448866	50.028	1.1061	50.028	49.296	50.403	0					134	32	7	0	0	0	0.00096677	2	7090	71.309
GPLIQAEDTALHLAPVSIPEAR	22	Unmodified	_GPLIQAEDTALHLAPVSIPEAR_					0	0	0	0	F1N3M8;G3MYP5	F1N3M8;G3MYP5	G3MYP5	MULTI-MSMS	20140904-PurClathDigest-1ug-02	2	1150.12	2	1149.62625	2297.23795	19315.53	-3.0292	-0.0034825	0.24934	0.00028665	-2.7799	-0.0031958	1150.12812138419	50.045	0.8305	50.045	49.507	50.337	0					73	24	5	0	0	0	2.4083E-18	1	7088	187.86
GPLIQAEDTALHLAPVSIPEAR	22	Unmodified	_GPLIQAEDTALHLAPVSIPEAR_					0	0	0	0	F1N3M8;G3MYP5	F1N3M8;G3MYP5	G3MYP5	MULTI-MSMS	20140904-PurClathDigest-1ug-03	3	1150.12	2	1149.62625	2297.23795	19174.54	-2.8383	-0.0032629	0.33482	0.00038492	-2.5034	-0.002878	1150.12834588667	50.234	0.70975	50.234	49.747	50.457	0					71	21	6	0	0	0	1.2353E-22	1	6854	220.86
GQAGGKLHIIEVGTPPTGNQPFPK	24	Unmodified	_GQAGGKLHIIEVGTPPTGNQPFPK_					0	0	0	1	P49951;F1MPU0	P49951	P49951	MULTI-MSMS	20140904-PurClathDigest-1ug-01	1	815.44	3	815.107924	2442.30194	23655.38	-5.0898	-0.0041487	-0.19797	-0.00016136	-5.2878	-0.0043101	815.442623602592	41.815	0.52492	41.815	41.568	42.092	0					67	16	6	0	0	0	0.04441	1	5497	55.128
GQAGGKLHIIEVGTPPTGNQPFPK	24	Unmodified	_GQAGGKLHIIEVGTPPTGNQPFPK_					0	0	0	1	P49951;F1MPU0	P49951	P49951	MULTI-MSMS	20140904-PurClathDigest-1ug-02	2	815.44	3	815.107924	2442.30194	24192.69	-5.0499	-0.0041162	0.26323	0.00021456	-4.7867	-0.0039016	815.443324561796	41.982	0.51525	41.982	41.765	42.28	0					64	15	6	0	0	0	0.037031	1	5043	53.998
GQAGGKLHIIEVGTPPTGNQPFPK	24	Unmodified	_GQAGGKLHIIEVGTPPTGNQPFPK_					0	0	0	1	P49951;F1MPU0	P49951	P49951	MULTI-MSMS	20140904-PurClathDigest-1ug-03	3	815.44	3	815.107924	2442.30194	23759.5	-6.1642	-0.0050245	0.35732	0.00029126	-5.8069	-0.0047332	815.443108297375	42.101	0.642	42.101	41.828	42.47	0					67	18	6	0	0	0	0.021753	1	4828	51.31
GQEPPTDILK	10	Unmodified	_GQEPPTDILK_					0	0	0	0	F1MEW3	F1MEW3	F1MEW3	MULTI-MSMS	20140904-PurClathDigest-1ug-01	1	549.29	2	549.295496	1096.57644	28890.77	-5.1292	-0.0028175	0.72032	0.00039567	-4.4089	-0.0024218	549.295878013524	39.886	1.0677	39.886	39.519	40.587	0					89	34	4	0	0	0	0.024654	1	4981	83.499
GQEPPTDILK	10	Unmodified	_GQEPPTDILK_					0	0	0	0	F1MEW3	F1MEW3	F1MEW3	MULTI-MSMS	20140904-PurClathDigest-1ug-02	2	549.29	2	549.295496	1096.57644	28931.36	-4.7104	-0.0025874	0.67237	0.00036933	-4.038	-0.002218	549.295835160811	40.269	1.1435	40.269	39.849	40.992	0					94	34	4	0	0	0	0.024654	2	4643	83.499
GQEPPTDILK	10	Unmodified	_GQEPPTDILK_					0	0	0	0	F1MEW3	F1MEW3	F1MEW3	MULTI-MSMS	20140904-PurClathDigest-1ug-03	3	549.29	2	549.295496	1096.57644	28797.57	-4.3562	-0.0023928	0.1531	8.4097E-05	-4.2031	-0.0023087	549.295592796313	40.31	1.0008	40.31	39.889	40.89	0					84	29	4	0	0	0	0.040533	2	4436	73.887
GQFSTDELVAEVEK	14	Unmodified	_GQFSTDELVAEVEK_					0	0	0	0	P49951;F1MPU0	P49951	P49951	MULTI-MSMS	20140904-PurClathDigest-1ug-01	1	776.38	2	776.380485	1550.74642	23554.06	-3.9071	-0.0030334	1.2325	0.00095689	-2.6746	-0.0020765	776.381528982578	47.271	0.55516	47.271	46.997	47.552	0					80	17	6	0	0	0	0.0028396	2	7000	81.632
GQFSTDELVAEVEK	14	Unmodified	_GQFSTDELVAEVEK_					0	0	0	0	P49951;F1MPU0	P49951	P49951	MULTI-MSMS	20140904-PurClathDigest-1ug-02	2	776.38	2	776.380485	1550.74642	23570.87	-4.2285	-0.0032829	1.6322	0.0012672	-2.5963	-0.0020157	776.382006922428	47.504	0.87233	47.504	47.252	48.125	0					85	26	6	0	0	0	8.4221E-05	2	6427	118.51
GQFSTDELVAEVEK	14	Unmodified	_GQFSTDELVAEVEK_					0	0	0	0	P49951;F1MPU0	P49951	P49951	MULTI-MSMS	20140904-PurClathDigest-1ug-03	3	776.38	2	776.380485	1550.74642	24180.2	-4.5025	-0.0034957	1.6401	0.0012734	-2.8624	-0.0022223	776.382123252721	47.366	1.0315	47.366	47.127	48.159	0					78	30	6	0	0	0	0.00453	1	6138	79.652
GQFSTDELVAEVEKR	15	Unmodified	_GQFSTDELVAEVEKR_					0	0	0	1	P49951;F1MPU0	P49951	P49951	MULTI-MSMS	20140904-PurClathDigest-1ug-01	1	569.95	3	569.956453	1706.84753	27458.13	-5.1127	-0.002914	0.79221	0.00045152	-4.3205	-0.0024625	569.956845909128	43.259	0.26292	43.259	43.135	43.398	0					32	8	6	0	0	0	0.00041298	1	5908	96.673
GQFSTDELVAEVEKR	15	Unmodified	_GQFSTDELVAEVEKR_					0	0	0	1	P49951;F1MPU0	P49951	P49951	MULTI-MSMS	20140904-PurClathDigest-1ug-01	1	854.43	2	854.431041	1706.84753	22238.69	-4.5368	-0.0038764	0.027678	2.3649E-05	-4.5091	-0.0038527	854.431251043821	43.261	0.2035	43.261	43.165	43.368	0					25	6	5	0	0	0	0.00041965	1	5918	123.76
GQFSTDELVAEVEKR	15	Unmodified	_GQFSTDELVAEVEKR_					0	0	0	1	P49951;F1MPU0	P49951	P49951	MULTI-MSMS	20140904-PurClathDigest-1ug-01	1	569.95	3	569.956453	1706.84753	27807.22	-3.9766	-0.0022665	-1.0895	-0.00062096	-5.0661	-0.0028874	569.956309296528	45.985	2.3892	45.985	45.579	47.968	0					337	78	7	0	0	0	5.4059E-08	7	6633	143.93
GQFSTDELVAEVEKR	15	Unmodified	_GQFSTDELVAEVEKR_					0	0	0	1	P49951;F1MPU0	P49951	P49951	MULTI-MSMS	20140904-PurClathDigest-1ug-01	1	854.43	2	854.431041	1706.84753	23044.59	-3.393	-0.0028991	-2.3016	-0.0019665	-5.6945	-0.0048656	854.429729577441	45.964	2.3286	45.964	45.549	47.878	0					278	76	7	0	0	0	1.217E-11	6	6632	199.38
GQFSTDELVAEVEKR	15	Unmodified	_GQFSTDELVAEVEKR_					0	0	0	1	P49951;F1MPU0	P49951	P49951	MULTI-MSMS	20140904-PurClathDigest-1ug-01	1	569.96	3	569.956453	1706.84753	28771.56	-3.3695	-0.0019205	0.12206	6.9566E-05	-3.2474	-0.0018509	569.956723822869	61.464	1.4652	61.464	61.12	62.586	-3.8147E-06					70	27	4	0	0	0	0.00027307	1	10067	103.79
GQFSTDELVAEVEKR	15	Unmodified	_GQFSTDELVAEVEKR_					0	0	0	1	P49951;F1MPU0	P49951	P49951	MULTI-MSMS	20140904-PurClathDigest-1ug-02	2	570.29	3	569.956453	1706.84753	27463.58	-3.5163	-0.0020042	1.3377	0.00076246	-2.1786	-0.0012417	570.292480283158	45.44	0.40942	45.44	45.237	45.646	0					40	12	5	0	0	0	0.00027307	1	5936	103.79
GQFSTDELVAEVEKR	15	Unmodified	_GQFSTDELVAEVEKR_					0	0	0	1	P49951;F1MPU0	P49951	P49951	MULTI-MSMS	20140904-PurClathDigest-1ug-02	2	569.95	3	569.956453	1706.84753	27787.59	-4.4601	-0.0025421	-0.58549	-0.0003337	-5.0456	-0.0028758	569.956640564145	46.476	3.8168	46.476	46.168	49.985	0					334	117	7	0	0	0	5.4059E-08	5	6147	143.93
GQFSTDELVAEVEKR	15	Unmodified	_GQFSTDELVAEVEKR_					0	0	0	1	P49951;F1MPU0	P49951	P49951	MULTI-MSMS	20140904-PurClathDigest-1ug-02	2	854.43	2	854.431041	1706.84753	23120.26	-4.5738	-0.003908	-1.0871	-0.00092888	-5.6609	-0.0048368	854.430842733717	46.457	2.1738	46.457	46.046	48.22	0					236	68	7	0	0	0	2.5018E-21	5	6148	261.17
GQFSTDELVAEVEKR	15	Unmodified	_GQFSTDELVAEVEKR_					0	0	0	1	P49951;F1MPU0	P49951	P49951	MULTI-MSMS	20140904-PurClathDigest-1ug-03	3	569.96	3	569.956453	1706.84753	27735.51	-3.8601	-0.0022001	-1.0445	-0.00059533	-4.9046	-0.0027954	569.956373880694	46.368	2.3812	46.368	46.067	48.448	0					280	73	7	0	0	0	9.8249E-06	6	5864	133.47
GQFSTDELVAEVEKR	15	Unmodified	_GQFSTDELVAEVEKR_					0	0	0	1	P49951;F1MPU0	P49951	P49951	MULTI-MSMS	20140904-PurClathDigest-1ug-03	3	854.43	2	854.431041	1706.84753	23121.69	-3.838	-0.0032793	-1.6689	-0.001426	-5.5069	-0.0047053	854.43035212971	46.348	2.3793	46.348	46.004	48.383	3.8147E-06					221	73	7	0	0	0	1.2333E-15	4	5865	229.31
GSATGLSLK	9	Unmodified	_GSATGLSLK_					0	0	0	0	Q08DH7	Q08DH7	Q08DH7	MULTI-MSMS	20140904-PurClathDigest-1ug-03	3	417.24	2	417.239993	832.465432	32178.27	-5.3784	-0.0022441	-0.09743	-4.0652E-05	-5.4759	-0.0022847	417.239927474134	37.096	0.84608	37.096	36.893	37.739	-3.8147E-06					62	22	5	0	0	0	0.052485	1	3669	76.228
GSATGLSLKKEEEEEEASK	19	Unmodified	_GSATGLSLKKEEEEEEASK_					0	0	0	2	Q08DH7	Q08DH7	Q08DH7	MULTI-MSMS	20140904-PurClathDigest-1ug-01	1	1011.49	2	1011.49731	2020.98006	20872.51	-7.02	-0.0071007	0.19846	0.00020074	-6.8216	-0.0069	1011.99891326032	35.369	0.63942	35.369	35.161	35.801	0					76	19	6	0	0	0	5.8223E-22	2	3835	270.08
GSATGLSLKKEEEEEEASK	19	Unmodified	_GSATGLSLKKEEEEEEASK_					0	0	0	2	Q08DH7	Q08DH7	Q08DH7	MULTI-MSMS	20140904-PurClathDigest-1ug-01	1	675	3	674.667296	2020.98006	25713.42	-7.1371	-0.0048152	0.47355	0.00031949	-6.6636	-0.0044957	674.667671330157	35.369	0.67209	35.369	35.161	35.833	0					78	20	5	0	0	0	0.00032295	1	3849	111.57
GSATGLSLKKEEEEEEASK	19	Unmodified	_GSATGLSLKKEEEEEEASK_					0	0	0	2	Q08DH7	Q08DH7	Q08DH7	MULTI-MSMS	20140904-PurClathDigest-1ug-02	2	674.66	3	674.667296	2020.98006	25614.15	-6.921	-0.0046694	0.48133	0.00032474	-6.4397	-0.0043447	674.667695666939	35.709	0.45392	35.709	35.497	35.951	0					57	13	5	0	0	0	2.9793E-18	1	3535	233.63
GSATGLSLKKEEEEEEASK	19	Unmodified	_GSATGLSLKKEEEEEEASK_					0	0	0	2	Q08DH7	Q08DH7	Q08DH7	MULTI-MSMS	20140904-PurClathDigest-1ug-02	2	1011.99	2	1011.49731	2020.98006	21063.76	-6.9325	-0.0070122	0.32865	0.00033242	-6.6039	-0.0066798	1011.99910539013	35.713	0.45375	35.713	35.53	35.983	3.8147E-06					54	13	6	0	0	0	6.6051E-34	1	3540	301.59
GSATGLSLKKEEEEEEASK	19	Unmodified	_GSATGLSLKKEEEEEEASK_					0	0	0	2	Q08DH7	Q08DH7	Q08DH7	MULTI-MSMS	20140904-PurClathDigest-1ug-03	3	675	3	674.667296	2020.98006	25576.91	-7.192	-0.0048522	1.108	0.00074756	-6.084	-0.0041047	675.002366370262	35.591	0.61583	35.591	35.407	36.023	0					64	17	5	0	0	0	6.6288E-08	1	3336	167.99
GSATGLSLKKEEEEEEASK	19	Unmodified	_GSATGLSLKKEEEEEEASK_					0	0	0	2	Q08DH7	Q08DH7	Q08DH7	MULTI-MSMS	20140904-PurClathDigest-1ug-03	3	1011.99	2	1011.49731	2020.98006	20902.59	-7.5281	-0.0076146	1.2616	0.0012761	-6.2665	-0.0063385	1011.49854608128	35.591	0.40833	35.591	35.407	35.815	0					47	11	6	0	0	0	1.4852E-26	1	3337	279.53
GSATGLSLKKEEEEEEASK	19	Unmodified	_GSATGLSLKKEEEEEEASK_					0	0	0	2	Q08DH7	Q08DH7	Q08DH7	MULTI-MSMS	20140904-PurClathDigest-1ug-03	3	506.5	4	506.252291	2020.98006	29829.41	-7.5598	-0.0038272	1.7877	0.00090503	-5.7721	-0.0029221	506.50386506638	35.572	0.26675	35.572	35.442	35.708	0					26	7	5	0	0	0	0.038122	1	3349	65.022
GSDGAASSYQLK	12	Unmodified	_GSDGAASSYQLK_					0	0	0	0	F1MIC9	F1MIC9	F1MIC9	MULTI-MSMS	20140904-PurClathDigest-1ug-01	1	592.28	2	592.283117	1182.55168	28361.91	-6.5976	-0.0039076	-0.83945	-0.00049719	-7.437	-0.0044048	592.283126229446	35.582	0.5215	35.582	35.344	35.865	0					29	15	3	0	0	0	0.00061735	1	3902	105.65
GSDGAASSYQLK	12	Unmodified	_GSDGAASSYQLK_					0	0	0	0	F1MIC9	F1MIC9	F1MIC9	MULTI-MSMS	20140904-PurClathDigest-1ug-03	3	592.28	2	592.283117	1182.55168	28688.8	-6.7595	-0.0040035	-0.70867	-0.00041973	-7.4681	-0.0044233	592.283042769233	35.772	0.40575	35.772	35.51	35.916	0					17	11	2	0	0	0	0.00026634	1	3396	117.79
GSGGGSSGGSIGGR	14	Unmodified	_GSGGGSSGGSIGGR_					0	0	0	0	CON__P04264	CON__P04264	CON__P04264	MULTI-MSMS	20140904-PurClathDigest-1ug-02	2	546.75	2	546.755058	1091.49556	28301.53	-5.4295	-0.0029686	0.025902	1.4162E-05	-5.4036	-0.0029544	546.755053616757	30.708	0.2585	30.708	30.614	30.872	0					22	7	5	0	0	0	7.4302E-05	1	2407	121.24
GSGGGSSGGSIGGR	14	Unmodified	_GSGGGSSGGSIGGR_					0	0	0	0	CON__P04264	CON__P04264	CON__P04264	MULTI-MSMS	20140904-PurClathDigest-1ug-03	3	546.75	2	546.755058	1091.49556	28328.84	-4.8727	-0.0026641	-1.15	-0.00062877	-6.0227	-0.0032929	546.754472642473	30.723	0.272	30.723	30.606	30.878	0					16	7	3	0	0	0	5.5013E-05	1	2275	135.81
GSLGGGFSSGGFSGGSFSR	19	Unmodified	_GSLGGGFSSGGFSGGSFSR_					0	0	0	0	CON__P13645	CON__P13645	CON__P13645	MULTI-MSMS	20140904-PurClathDigest-1ug-01	1	854.38	2	854.389707	1706.76486	20984.34	-3.883	-0.0033176	-1.0554	-0.00090174	-4.9384	-0.0042193	854.388662872277	44.666	0.4545	44.666	44.444	44.898	0					48	14	4	0	0	0	2.0393E-05	1	6283	110.56
GSPSTVSSSYK	11	Unmodified	_GSPSTVSSSYK_					0	0	0	0	F1MDZ2;O77788	F1MDZ2	F1MDZ2	MULTI-MSMS	20140904-PurClathDigest-1ug-01	1	550.26	2	550.266936	1098.51932	28258.83	-6.4519	-0.0035502	0.688	0.00037858	-5.7639	-0.0031717	550.267311198481	32.505	0.42159	32.505	32.339	32.761	0					35	13	4	0	0	0	0.019896	1	3117	84.479
GSPSTVSSSYK	11	Unmodified	_GSPSTVSSSYK_					0	0	0	0	F1MDZ2;O77788	F1MDZ2	F1MDZ2	MULTI-MSMS	20140904-PurClathDigest-1ug-02	2	550.26	2	550.266936	1098.51932	28191.3	-6.2045	-0.0034141	0.9108	0.00050118	-5.2937	-0.0029129	550.267494259457	32.699	0.72833	32.699	32.5	33.228	0					48	20	4	0	0	0	0.026213	1	2854	80.014
GSPSTVSSSYK	11	Unmodified	_GSPSTVSSSYK_					0	0	0	0	F1MDZ2;O77788	F1MDZ2	F1MDZ2	MULTI-MSMS	20140904-PurClathDigest-1ug-03	3	550.26	2	550.266936	1098.51932	28189.99	-6.0887	-0.0033504	0.52967	0.00029146	-5.559	-0.0030589	550.267283964952	32.766	0.51917	32.766	32.542	33.062	0					35	14	4	0	0	0	0.019896	1	2702	84.479
GSPSTVSSSYKR	12	Unmodified	_GSPSTVSSSYKR_					0	0	0	1	F1MDZ2;O77788	F1MDZ2	F1MDZ2	MULTI-MSMS	20140904-PurClathDigest-1ug-01	1	628.31	2	628.317491	1254.62043	26412.67	-6.2491	-0.0039264	-0.5244	-0.00032949	-6.7735	-0.0042559	628.317211254808	31.433	0.63108	31.433	31.211	31.842	0					54	19	4	0	0	0	1.7357E-05	1	2828	158.42
GSPSTVSSSYKR	12	Unmodified	_GSPSTVSSSYKR_					0	0	0	1	F1MDZ2;O77788	F1MDZ2	F1MDZ2	MULTI-MSMS	20140904-PurClathDigest-1ug-01	1	419.21	3	419.214086	1254.62043	32369.45	-6.3243	-0.0026513	-0.23506	-9.854E-05	-6.5594	-0.0027498	419.213992411029	31.409	0.64358	31.409	30.977	31.621	0					47	19	4	0	0	0	0.0012671	1	2841	95.477
GSPSTVSSSYKR	12	Unmodified	_GSPSTVSSSYKR_					0	0	0	1	F1MDZ2;O77788	F1MDZ2	F1MDZ2	MULTI-MSMS	20140904-PurClathDigest-1ug-02	2	628.31	2	628.317491	1254.62043	26556.16	-5.4617	-0.0034317	-0.48122	-0.00030236	-5.943	-0.0037341	628.317207811436	31.439	0.62333	31.439	31.21	31.834	0					53	17	6	0	0	0	5.4035E-06	1	2555	181.49
GSPSTVSSSYKR	12	Unmodified	_GSPSTVSSSYKR_					0	0	0	1	F1MDZ2;O77788	F1MDZ2	F1MDZ2	MULTI-MSMS	20140904-PurClathDigest-1ug-02	2	419.21	3	419.214086	1254.62043	32149.01	-5.764	-0.0024164	0.51699	0.00021673	-5.247	-0.0021996	419.21432983267	31.423	0.65358	31.423	30.978	31.631	0					38	17	4	0	0	0	0.016409	1	2571	67.999
GSPSTVSSSYKR	12	Unmodified	_GSPSTVSSSYKR_					0	0	0	1	F1MDZ2;O77788	F1MDZ2	F1MDZ2	MULTI-MSMS	20140904-PurClathDigest-1ug-03	3	628.31	2	628.317491	1254.62043	26603.19	-5.0759	-0.0031893	-0.22286	-0.00014002	-5.2988	-0.0033293	628.317360171672	31.486	0.56142	31.486	31.237	31.798	-1.9073E-06					47	14	6	0	0	0	5.4035E-06	1	2419	181.49
GSPSTVSSSYKR	12	Unmodified	_GSPSTVSSSYKR_					0	0	0	1	F1MDZ2;O77788	F1MDZ2	F1MDZ2	MULTI-MSMS	20140904-PurClathDigest-1ug-03	3	419.21	3	419.214086	1254.62043	31807.41	-5.2367	-0.0021953	0.76552	0.00032091	-4.4712	-0.0018744	419.21448772135	31.463	0.83659	31.463	30.997	31.834	0					48	21	4	0	0	0	0.0027657	1	2433	95.477
GSSSGGGYSSGSSSYGSGGR	20	Unmodified	_GSSSGGGYSSGSSSYGSGGR_					0	0	0	0	CON__P35908	CON__P35908	CON__P35908	MULTI-MSMS	20140904-PurClathDigest-1ug-03	3	870.85	2	870.856426	1739.6983	22615.68	-6.311	-0.005496	-0.2593	-0.00022581	-6.5703	-0.0057218	870.855948396817	32.848	0.30258	32.848	32.684	32.987	0					26	8	4	0	0	0	1.5136E-05	1	2732	118.37
GTEITHAVVIK	11	Unmodified	_GTEITHAVVIK_					0	0	0	0	Q3SYW6	Q3SYW6	Q3SYW6	MULTI-MSMS	20140904-PurClathDigest-1ug-01	1	584.34	2	584.340238	1166.66592	27311.27	-5.8204	-0.0034011	-0.03732	-2.1808E-05	-5.8577	-0.0034229	584.340200947843	36.763	0.42042	36.763	36.558	36.978	0					29	12	3	0	0	0	3.64E-05	1	4198	143.24
GTEITHAVVIK	11	Unmodified	_GTEITHAVVIK_					0	0	0	0	Q3SYW6	Q3SYW6	Q3SYW6	MULTI-MSMS	20140904-PurClathDigest-1ug-02	2	584.34	2	584.340238	1166.66592	27368.23	-4.9895	-0.0029156	0.25552	0.00014931	-4.734	-0.0027663	584.340200748681	37.013	0.34558	37.013	36.851	37.196	0					24	9	4	0	0	0	0.00014392	1	3862	134.13
GTEITHAVVIK	11	Unmodified	_GTEITHAVVIK_					0	0	0	0	Q3SYW6	Q3SYW6	Q3SYW6	MULTI-MSMS	20140904-PurClathDigest-1ug-03	3	584.34	2	584.340238	1166.66592	27307.63	-4.963	-0.0029001	-0.52316	-0.0003057	-5.4862	-0.0032058	584.339860857557	37.127	0.36333	37.127	36.964	37.327	0					26	9	4	0	0	0	5.6489E-06	1	3694	148.28
GTESPFEGKDEK	12	Unmodified	_GTESPFEGKDEK_					0	0	0	1	F1N1S2	F1N1S2	F1N1S2	MULTI-MSMS	20140904-PurClathDigest-1ug-02	2	441.87	3	441.873618	1322.59903	32422.05	-5.437	-0.0024025	0.75746	0.0003347	-4.6796	-0.0020678	441.873857165668	33.892	0.40858	33.892	33.693	34.102	0					29	11	4	0	0	0	0.008411	1	3136	84.479
GTESPFEGKDEK	12	Unmodified	_GTESPFEGKDEK_					0	0	0	1	F1N1S2	F1N1S2	F1N1S2	MULTI-MSMS	20140904-PurClathDigest-1ug-03	3	662.3	2	662.306789	1322.59903	24291.85	-5.7552	-0.0038117	0.87628	0.00058037	-4.8789	-0.0032313	662.307464120025	33.917	0.37283	33.917	33.711	34.084	0					29	10	4	0	0	0	9.3593E-05	1	2970	150.51
GTESPFEGKDEK	12	Unmodified	_GTESPFEGKDEK_					0	0	0	1	F1N1S2	F1N1S2	F1N1S2	MULTI-MSMS	20140904-PurClathDigest-1ug-03	3	441.87	3	441.873618	1322.59903	32641.75	-5.4908	-0.0024262	0.067114	2.9656E-05	-5.4237	-0.0023966	441.873606509604	33.931	0.40767	33.931	33.711	34.119	0					31	11	5	0	0	0	0.0055297	1	2971	94.767
GTKWEMAR	8	Oxidation (M)	_GTKWEM(ox)AR_		GTKWEM(1)AR		GTKWEM(90.13)AR	0	0	1	1	F1MDZ2;O77788	F1MDZ2	F1MDZ2	MULTI-MSMS	20140904-PurClathDigest-1ug-02	2	497.74	2	497.742376	993.4702	29684.06	-6.8703	-0.0034196	0.6577	0.00032737	-6.2126	-0.0030923	497.742621965801	32.281	0.34184	32.281	32.123	32.465	0					20	9	3	0	0	0	0.032265	1	2765	90.135
GTKWEMAR	8	Oxidation (M)	_GTKWEM(ox)AR_		GTKWEM(1)AR		GTKWEM(110.22)AR	0	0	1	1	F1MDZ2;O77788	F1MDZ2	F1MDZ2	MULTI-MSMS	20140904-PurClathDigest-1ug-03	3	497.74	2	497.742376	993.4702	29833.67	-7.0854	-0.0035267	0.40809	0.00020313	-6.6773	-0.0033236	497.742596040829	32.386	0.35592	32.386	32.223	32.579	0					18	9	3	0	0	0	0.012234	1	2630	110.22
GTLDPVEK	8	Unmodified	_GTLDPVEK_					0	0	0	0	P19120	P19120	P19120	MULTI-MSMS	20140904-PurClathDigest-1ug-01	1	429.73	2	429.732	857.449448	32146.11	-7.1846	-0.0030874	0.097843	4.2046E-05	-7.0867	-0.0030454	429.732087204998	35.046	0.40908	35.046	34.842	35.251	0					28	12	3	0	0	0	0.05126	1	3769	78.516
GTNESLER	8	Unmodified	_GTNESLER_					0	0	0	0	Q28115	Q28115	Q28115	MULTI-MSMS	20140904-PurClathDigest-1ug-01	1	453.22	2	453.219788	904.425024	32073.67	-7.2672	-0.0032936	1.0589	0.00047991	-6.2083	-0.0028137	453.220176892558	31.705	0.44308	31.705	31.558	32.001	0					28	13	4	0	0	0	0.0010828	1	2906	130.28
GTNESLER	8	Unmodified	_GTNESLER_					0	0	0	0	Q28115	Q28115	Q28115	MULTI-MSMS	20140904-PurClathDigest-1ug-02	2	453.22	2	453.219788	904.425024	31274.2	-7.2907	-0.0033043	0.99579	0.00045131	-6.2949	-0.002853	453.220224018727	31.76	0.41908	31.76	31.596	32.015	-1.9073E-06					27	11	4	0	0	0	0.0011032	1	2636	125.31
GTNESLER	8	Unmodified	_GTNESLER_					0	0	0	0	Q28115	Q28115	Q28115	MULTI-MSMS	20140904-PurClathDigest-1ug-03	3	453.22	2	453.219788	904.425024	31900.87	-7.7076	-0.0034932	1.6561	0.00075056	-6.0516	-0.0027427	453.220471891474	31.812	0.40784	31.812	31.66	32.068	-1.9073E-06					27	10	4	0	0	0	0.0010217	1	2496	139.97
GTQGVVTNFEIFR	13	Unmodified	_GTQGVVTNFEIFR_					0	0	0	0	A7MB16	A7MB16	A7MB16	MULTI-MSMS	20140904-PurClathDigest-1ug-01	1	734.88	2	734.383165	1466.75178	24632.65	-2.2722	-0.0016686	0.20281	0.00014894	-2.0693	-0.0015197	734.383409432319	49.342	0.49017	49.342	49.119	49.609	0					35	15	4	0	0	0	1.2649E-06	1	7526	143.25
GTVGEPTYDAEFQHFLR	17	Unmodified	_GTVGEPTYDAEFQHFLR_					0	0	0	0	E1BDX8	E1BDX8	E1BDX8	MULTI-MSMS	20140904-PurClathDigest-1ug-01	1	656.31	3	656.31464	1965.92209	25950.19	-4.1957	-0.0027537	0.57301	0.00037607	-3.6227	-0.0023777	656.649236030911	47.497	0.24117	47.497	47.341	47.582	0					22	7	4	0	0	0	0.043383	1	7036	35.473
GTYLATFHQR	10	Unmodified	_GTYLATFHQR_					0	0	0	0	A7MB16	A7MB16	A7MB16	MULTI-MSMS	20140904-PurClathDigest-1ug-02	2	597.3	2	597.306729	1192.59891	27812.66	-5.3599	-0.0032015	1.0312	0.00061591	-4.3288	-0.0025856	597.307458572632	38.674	0.48641	38.674	38.474	38.961	0					35	13	4	0	0	0	2.6515E-05	1	4248	185.81
GVIDMGNSLIDR	12	Oxidation (M)	_GVIDM(ox)GNSLIDR_		GVIDM(1)GNSLIDR		GVIDM(108.72)GNSLIDR	0	0	1	0	E1BFB0	E1BFB0	E1BFB0	MULTI-MSMS	20140904-PurClathDigest-1ug-01	1	653.32	2	653.327002	1304.63945	25989.55	-5.3754	-0.0035119	0.057025	3.7256E-05	-5.3184	-0.0034746	653.327392981826	41.669	0.3145	41.669	41.507	41.821	0					22	9	3	0	0	0	0.0097324	1	5485	108.72
GVIDMGNSLIDR	12	Oxidation (M)	_GVIDM(ox)GNSLIDR_		GVIDM(1)GNSLIDR		GVIDM(96.74)GNSLIDR	0	0	1	0	E1BFB0	E1BFB0	E1BFB0	MULTI-MSMS	20140904-PurClathDigest-1ug-03	3	653.32	2	653.327002	1304.63945	25737.97	-6.457	-0.0042185	0.11228	7.3353E-05	-6.3447	-0.0041451	653.327008755607	41.945	0.515	41.945	41.73	42.245	0					21	14	3	0	0	0	0.02408	1	4813	96.745
GVSGDRDENSFSLNSSISSAR	21	Unmodified	_GVSGDRDENSFSLNSSISSAR_					0	0	0	1	F1MEW3	F1MEW3	F1MEW3	MULTI-MSMS	20140904-PurClathDigest-1ug-01	1	1093.51	2	1093.00943	2184.00432	20195.05	-6.7248	-0.0073503	-0.37169	-0.00040626	-7.0965	-0.0077566	1093.50992160299	40.571	0.63792	40.571	40.251	40.889	0					56	20	4	0	0	0	7.3311E-19	1	5180	221.14
GVSGDRDENSFSLNSSISSAR	21	Unmodified	_GVSGDRDENSFSLNSSISSAR_					0	0	0	1	F1MEW3	F1MEW3	F1MEW3	MULTI-MSMS	20140904-PurClathDigest-1ug-01	1	729.34	3	729.008715	2184.00432	24458.86	-5.9362	-0.0043275	-0.48603	-0.00035432	-6.4222	-0.0046819	729.008896184394	40.546	0.70033	40.546	40.096	40.796	0					55	22	4	0	0	0	0.00040989	1	5181	99.407
GVSGDRDENSFSLNSSISSAR	21	Unmodified	_GVSGDRDENSFSLNSSISSAR_					0	0	0	1	F1MEW3	F1MEW3	F1MEW3	MULTI-MSMS	20140904-PurClathDigest-1ug-02	2	729.34	3	729.008715	2184.00432	24864.23	-5.9135	-0.004311	0.079754	5.8141E-05	-5.8338	-0.0042529	729.343069451014	40.958	0.70067	40.958	40.474	41.175	0					48	21	4	0	0	0	0.00046263	1	4800	82.8
GVSGDRDENSFSLNSSISSAR	21	Unmodified	_GVSGDRDENSFSLNSSISSAR_					0	0	0	1	F1MEW3	F1MEW3	F1MEW3	MULTI-MSMS	20140904-PurClathDigest-1ug-02	2	1093	2	1093.00943	2184.00432	20104.7	-6.3306	-0.0069194	-1.4068	-0.0015377	-7.7374	-0.0084571	1093.00988383311	40.989	0.8655	40.989	40.474	41.34	0					84	26	6	0	0	0	1.0095E-09	1	4803	168.75
GVSGDRDENSFSLNSSISSAR	21	Unmodified	_GVSGDRDENSFSLNSSISSAR_					0	0	0	1	F1MEW3	F1MEW3	F1MEW3	MULTI-MSMS	20140904-PurClathDigest-1ug-03	3	729.34	3	729.008715	2184.00432	24586.75	-5.8276	-0.0042484	-0.91818	-0.00066936	-6.7458	-0.0049178	729.34258337018	40.975	0.904	40.975	40.398	41.302	0					60	27	4	0	0	0	0.044804	1	4566	49.559
GVSGDRDENSFSLNSSISSAR	21	Unmodified	_GVSGDRDENSFSLNSSISSAR_					0	0	0	1	F1MEW3	F1MEW3	F1MEW3	MULTI-MSMS	20140904-PurClathDigest-1ug-03	3	1093.5	2	1093.00943	2184.00432	20087.31	-6.4481	-0.0070478	-1.611	-0.0017608	-8.0591	-0.0088086	1093.50908156509	40.992	0.73909	40.992	40.563	41.302	0					66	22	5	0	0	0	3.9437E-13	1	4568	165.1
GVVTNGLDVSPGDEK	15	Deamidation (NQ)	_GVVTN(de)GLDVSPGDEK_	GVVTN(1)GLDVSPGDEK		GVVTN(103.79)GLDVSPGDEK		0	1	0	0	F1MDZ2;O77788	F1MDZ2	F1MDZ2	MULTI-MSMS	20140904-PurClathDigest-1ug-01	1	744.36	2	744.364835	1486.71512	23926.18	-5.6503	-0.0042058	0.40134	0.00029874	-5.2489	-0.0039071	744.364447394245	41.039	0.41241	41.039	40.857	41.27	0					37	12	5	0	0	0	0.007275	1	5316	103.79
GYSFTTTAER	10	Unmodified	_GYSFTTTAER_					0	0	0	0	P63258;P60712;F1MRD0	P63258	P63258	MULTI-MSMS	20140904-PurClathDigest-1ug-01	1	566.76	2	566.767103	1131.51965	27800.35	-5.9047	-0.0033466	-0.14687	-8.3243E-05	-6.0516	-0.0034299	566.767061344461	38.808	0.7925	38.808	38.637	39.43	0					48	25	5	0	0	0	0.00019499	1	4732	131.45
GYSFTTTAER	10	Unmodified	_GYSFTTTAER_					0	0	0	0	P63258;P60712;F1MRD0	P63258	P63258	MULTI-MSMS	20140904-PurClathDigest-1ug-02	2	566.76	2	566.767103	1131.51965	28430.86	-4.7744	-0.002706	-0.79265	-0.00044925	-5.5671	-0.0031552	566.766823079977	39.235	0.919	39.235	39.058	39.977	0					43	27	4	0	0	0	0.00010362	1	4372	160.36
GYSFTTTAER	10	Unmodified	_GYSFTTTAER_					0	0	0	0	P63258;P60712;F1MRD0	P63258	P63258	MULTI-MSMS	20140904-PurClathDigest-1ug-03	3	566.76	2	566.767103	1131.51965	28376.43	-5.0205	-0.0028455	-0.74266	-0.00042092	-5.7632	-0.0032664	566.76679337709	39.36	0.29408	39.36	39.213	39.507	-3.8147E-06					28	8	4	0	0	0	8.1067E-05	1	4189	166.19
HAALVSELETTK	12	Unmodified	_HAALVSELETTK_					0	0	0	0	F1MEW3	F1MEW3	F1MEW3	MULTI-MSMS	20140904-PurClathDigest-1ug-01	1	649.85	2	649.851167	1297.68778	25900	-5.9116	-0.0038416	0.20673	0.00013434	-5.7048	-0.0037073	649.85133150734	38.779	0.8815	38.779	38.637	39.519	0					64	28	6	0	0	0	1.6666E-18	1	4717	263.57
HAALVSELETTK	12	Unmodified	_HAALVSELETTK_					0	0	0	0	F1MEW3	F1MEW3	F1MEW3	MULTI-MSMS	20140904-PurClathDigest-1ug-02	2	649.85	2	649.851167	1297.68778	26259.33	-4.9134	-0.003193	-0.58829	-0.0003823	-5.5017	-0.0035753	649.850759633663	39.243	0.919	39.243	39.058	39.977	0					70	27	5	0	0	0	2.2593E-18	1	4370	257.54
HAALVSELETTK	12	Unmodified	_HAALVSELETTK_					0	0	0	0	F1MEW3	F1MEW3	F1MEW3	MULTI-MSMS	20140904-PurClathDigest-1ug-03	3	649.85	2	649.851167	1297.68778	26513.68	-5.2277	-0.0033972	-0.82759	-0.00053781	-6.0552	-0.003935	649.850651190321	39.367	0.81583	39.367	39.213	40.029	0					55	23	6	0	0	0	3.5186E-19	1	4180	276.95
HALDANQGTATGPR	14	Unmodified	_HALDANQGTATGPR_					0	0	0	0	P22439	P22439	P22439	MULTI-MSMS	20140904-PurClathDigest-1ug-01	1	704.84	2	704.850021	1407.68549	25474.66	-7.1422	-0.0050342	-0.00029788	-2.0996E-07	-7.1425	-0.0050344	704.849948477208	31.629	0.28025	31.629	31.496	31.776	0					22	8	4	0	0	0	1.4362E-07	1	2892	141.85
HALDANQGTATGPR	14	Unmodified	_HALDANQGTATGPR_					0	0	0	0	P22439	P22439	P22439	MULTI-MSMS	20140904-PurClathDigest-1ug-02	2	704.84	2	704.850021	1407.68549	25768.7	-7.3471	-0.0051786	0.046214	3.2574E-05	-7.3009	-0.005146	704.850072932719	31.639	0.27608	31.639	31.487	31.763	0					21	7	4	0	0	0	7.2259E-05	1	2624	134.61
HDEYLEVTK	9	Unmodified	_HDEYLEVTK_					0	0	0	0	G3MYP5	G3MYP5	G3MYP5	MULTI-MSMS	20140904-PurClathDigest-1ug-01	1	567.27	2	567.277303	1132.54005	25196.51	-6.2558	-0.0035488	1.812	0.0010279	-4.4438	-0.0025209	567.278390745736	36.449	0.15617	36.449	36.369	36.525	0					15	4	4	0	0	0	3.5238E-05	1	4122	195.58
HDVVFLITK	9	Unmodified	_HDVVFLITK_					0	0	0	0	P49951;F1MPU0	P49951	P49951	MULTI-MSMS	20140904-PurClathDigest-1ug-01	1	536.31	2	536.313492	1070.61243	28396.66	-5.554	-0.0029787	0.023399	1.2549E-05	-5.5306	-0.0029661	536.313700591098	42.888	2.9797	42.888	42.54	45.52	-3.8147E-06					266	99	6	0	0	0	0.00047719	7	5752	145.25
HDVVFLITK	9	Unmodified	_HDVVFLITK_					0	0	0	0	P49951;F1MPU0	P49951	P49951	MSMS	20140904-PurClathDigest-1ug-01	1	536.31	2	536.313492	1070.61243	NaN	NaN	NaN	NaN	NaN	NaN	NaN	NaN	61.475	1	61.475	60.975	61.975	3.8147E-06								0	0	0	0.00018142	1	10069	102.52
HDVVFLITK	9	Unmodified	_HDVVFLITK_					0	0	0	0	P49951;F1MPU0	P49951	P49951	MULTI-MSMS	20140904-PurClathDigest-1ug-02	2	536.31	2	536.313492	1070.61243	28360.59	-5.8379	-0.0031309	0.55031	0.00029514	-5.2876	-0.0028358	536.313953298026	43.265	2.4531	43.265	42.913	45.366	0					285	76	6	0	0	0	0.00039328	7	5330	155.06
HDVVFLITK	9	Unmodified	_HDVVFLITK_					0	0	0	0	P49951;F1MPU0	P49951	P49951	MULTI-MSMS	20140904-PurClathDigest-1ug-03	3	536.31	2	536.313492	1070.61243	28303.26	-5.8323	-0.0031279	0.58105	0.00031163	-5.2513	-0.0028163	536.313976888663	43.432	2.3213	43.432	43.091	45.412	0					252	71	6	0	0	0	0.00034588	7	5184	159.11
HEIVAAAASFAPALLQPDDQK	21	Unmodified	_HEIVAAAASFAPALLQPDDQK_					0	0	0	0	F1MEW3	F1MEW3	F1MEW3	MULTI-MSMS	20140904-PurClathDigest-1ug-03	3	1097.07	2	1096.57094	2191.12733	20376.11	-4.1054	-0.0045018	0.29306	0.00032136	-3.8123	-0.0041805	1097.07283488856	48.091	0.42492	48.091	47.861	48.286	3.8147E-06					46	12	5	0	0	0	1.911E-18	1	6325	198.24
HELIEFR	7	Unmodified	_HELIEFR_					0	0	0	0	P49951;F1MPU0	P49951	P49951	MULTI-MSMS	20140904-PurClathDigest-1ug-01	1	472.25	2	472.253434	942.492316	30361.01	-6.3435	-0.0029958	-1.2317	-0.0005817	-7.5753	-0.0035775	472.252988136893	40.292	2.4467	40.292	39.914	42.361	0					219	79	6	0	0	0	0.00029224	4	5081	197.65
HELIEFR	7	Unmodified	_HELIEFR_					0	0	0	0	P49951;F1MPU0	P49951	P49951	MULTI-SECPEP	20140904-PurClathDigest-1ug-01	1	944.13	1	943.499592	942.492316	21817.31	-5.8176	-0.0054889	-1.4848	-0.0014009	-7.3024	-0.0068898	943.498095130062	40.251	0.91334	40.251	39.944	40.857	-3.8147E-06					61	29	4	0	0	0	0.037743	1	5162	55.441
HELIEFR	7	Unmodified	_HELIEFR_					0	0	0	0	P49951;F1MPU0	P49951	P49951	MULTI-MSMS	20140904-PurClathDigest-1ug-02	2	472.25	2	472.253434	942.492316	30651.57	-5.6535	-0.0026699	-1.1576	-0.0005467	-6.8112	-0.0032166	472.253009252413	40.814	2.2867	40.814	40.409	42.695	0					199	70	5	0	0	0	2.0374E-06	4	4778	225.8
HELIEFR	7	Unmodified	_HELIEFR_					0	0	0	0	P49951;F1MPU0	P49951	P49951	MULTI-SECPEP	20140904-PurClathDigest-1ug-02	2	943.43	1	943.499592	942.492316	21772.89	-5.2888	-0.0049899	-2.0184	-0.0019043	-7.3071	-0.0068943	943.498428284839	40.76	0.7385	40.76	40.377	41.115	3.8147E-06					52	22	4	0	0	0	0.027257	1	4822	64.803
HELIEFR	7	Unmodified	_HELIEFR_					0	0	0	0	P49951;F1MPU0	P49951	P49951	MULTI-MSMS	20140904-PurClathDigest-1ug-03	3	472.25	2	472.253434	942.492316	30470.18	-5.0707	-0.0023946	-1.9509	-0.0009213	-7.0215	-0.0033159	472.252476207574	39.491	0.849	39.491	39.28	40.129	0					50	24	3	0	0	0	0.0095312	1	4214	66.429
HELIEFR	7	Unmodified	_HELIEFR_					0	0	0	0	P49951;F1MPU0	P49951	P49951	MULTI-MSMS	20140904-PurClathDigest-1ug-03	3	472.25	2	472.253434	942.492316	30147.18	-5.7345	-0.0027082	-0.80727	-0.00038124	-6.5418	-0.0030894	472.253168411908	40.853	2.3374	40.853	40.464	42.802	3.8147E-06					208	70	6	0	0	0	4.854E-06	4	4630	214.59
HELIEFRR	8	Unmodified	_HELIEFRR_					0	0	0	1	P49951;F1MPU0	P49951	P49951	MULTI-MSMS	20140904-PurClathDigest-1ug-02	2	367.2	3	367.205085	1098.59343	35155.63	-4.345	-0.0015955	0.20346	7.4711E-05	-4.1415	-0.0015208	367.20521775146	37.717	0.37975	37.717	37.531	37.911	0					22	10	3	0	0	0	0.0002635	1	4032	135.83
HELIEFRR	8	Unmodified	_HELIEFRR_					0	0	0	1	P49951;F1MPU0	P49951	P49951	MULTI-MSMS	20140904-PurClathDigest-1ug-03	3	367.2	3	367.205085	1098.59343	36773.95	-4.1926	-0.0015395	-0.17753	-6.5188E-05	-4.3701	-0.0016047	367.205200739668	37.831	0.40517	37.831	37.662	38.067	-3.8147E-06					25	10	4	0	0	0	0.00021455	1	3845	163.04
HGGGGGGFGGGGFGSR	16	Unmodified	_HGGGGGGFGGGGFGSR_					0	0	0	0	CON__P35908	CON__P35908	CON__P35908	MULTI-MSMS	20140904-PurClathDigest-1ug-01	1	660.79	2	660.795049	1319.57554	26038.67	-5.8139	-0.0038418	-0.37378	-0.00024699	-6.1877	-0.0040888	660.794872672262	36.06	0.66259	36.06	35.769	36.431	0					48	20	3	0	0	0	7.6442E-13	1	3998	180.49
HGGGGGGFGGGGFGSR	16	Unmodified	_HGGGGGGFGGGGFGSR_					0	0	0	0	CON__P35908	CON__P35908	CON__P35908	MULTI-MSMS	20140904-PurClathDigest-1ug-02	2	660.79	2	660.795049	1319.57554	25995.28	-5.6549	-0.0037367	0.74118	0.00048977	-4.9137	-0.003247	660.795636845271	36.535	0.38284	36.535	36.316	36.699	0					33	10	5	0	0	0	7.0282E-11	1	3746	189.07
HGNSHQGEPR	10	Unmodified	_HGNSHQGEPR_					0	0	0	0	CON__P13645	CON__P13645	CON__P13645	MULTI-MSMS	20140904-PurClathDigest-1ug-01	1	559.76	2	559.757935	1117.50132	28379.04	-4.2671	-0.0023885	1.5828	0.00088599	-2.6843	-0.0015025	559.758916235252	20.727	0.36884	20.727	20.573	20.942	0					17	10	4	0	0	0	9.7109E-05	1	1627	149.96
HGNSHQGEPR	10	Unmodified	_HGNSHQGEPR_					0	0	0	0	CON__P13645	CON__P13645	CON__P13645	MSMS	20140904-PurClathDigest-1ug-01	1	373.51	3	373.507716	1117.50132	NaN	NaN	NaN	NaN	NaN	NaN	NaN	NaN	20.727	1	20.727	20.227	21.227	0								0	0	0	3.3641E-06	1	1625	110.38
HGNSHQGEPR	10	Unmodified	_HGNSHQGEPR_					0	0	0	0	CON__P13645	CON__P13645	CON__P13645	MULTI-MSMS	20140904-PurClathDigest-1ug-02	2	373.51	3	373.507716	1117.50132	33680.8	-3.1903	-0.0011916	0.35174	0.00013138	-2.8385	-0.0010602	373.50778110697	20.746	0.55234	20.746	20.502	21.055	0					32	22	4	0	0	0	0.001127	1	1440	112.3
HGNSHQGEPR	10	Unmodified	_HGNSHQGEPR_					0	0	0	0	CON__P13645	CON__P13645	CON__P13645	MULTI-MSMS	20140904-PurClathDigest-1ug-03	3	373.51	3	373.507716	1117.50132	34008.84	-2.5577	-0.00095532	0.38675	0.00014445	-2.171	-0.00081087	373.50789803796	20.654	0.35825	20.654	20.531	20.889	0					23	11	4	0	0	0	0.00015298	1	1384	121.6
HGNSHQGEPR	10	Deamidation (NQ)	_HGN(de)SHQGEPR_	HGN(1)SHQGEPR		HGN(59.5)SHQ(-59.5)GEPR		0	1	0	0	CON__P13645	CON__P13645	CON__P13645	MULTI-MSMS	20140904-PurClathDigest-1ug-01	1	560.25	2	560.249943	1118.48533	30084.26	-4.3018	-0.0024101	-1.6704	-0.00093584	-5.9722	-0.0033459	560.249077339714	20.86	0.46283	20.86	20.7	21.163	0					14	7	3	0	0	0	0.0019835	1	1639	130.41
HGNSHQGEPR	10	Deamidation (NQ)	_HGN(de)SHQGEPR_	HGN(0.987)SHQ(0.013)GEPR		HGN(18.77)SHQ(-18.77)GEPR		0	1	0	0	CON__P13645	CON__P13645	CON__P13645	MULTI-SECPEP	20140904-PurClathDigest-1ug-02	2	559.76	2	560.249943	1118.48533	29765.44	-3.5023	-0.0019622	-0.85953	-0.00048155	-4.3618	-0.0024437	560.249627470435	20.863	0.31817	20.863	20.736	21.055	0					11	4	4	0	0	0	0.039209	1	1443	55.353
HGNSHQGEPR	10	Deamidation (NQ)	_HGN(de)SHQGEPR_	HGN(0.814)SHQ(0.186)GEPR		HGN(6.41)SHQ(-6.41)GEPR		0	1	0	0	CON__P13645	CON__P13645	CON__P13645	MULTI-SECPEP	20140904-PurClathDigest-1ug-03	3	559.76	2	560.249943	1118.48533	30247.18	-2.9679	-0.0016628	-1.5216	-0.0008525	-4.4895	-0.0025152	560.24918604438	20.756	0.24392	20.756	20.646	20.889	0					6	3	2	0	0	0	0.045125	1	1389	51.276
HGVQELEIELQSQLSK	16	Unmodified	_HGVQELEIELQSQLSK_					0	0	0	0	CON__P35527	CON__P35527	CON__P35527	MULTI-MSMS	20140904-PurClathDigest-1ug-01	1	919.48	2	919.486347	1836.95814	22133.91	-2.8444	-0.0026154	-1.0172	-0.00093532	-3.8616	-0.0035507	919.485184225162	48.349	0.78775	48.349	48.119	48.907	-3.8147E-06					61	25	4	0	0	0	3.1195E-22	1	7246	245.04
HGVQELEIELQSQLSK	16	Unmodified	_HGVQELEIELQSQLSK_					0	0	0	0	CON__P35527	CON__P35527	CON__P35527	MULTI-MSMS	20140904-PurClathDigest-1ug-02	2	919.49	2	919.486347	1836.95814	21891.25	-2.6422	-0.0024295	-0.19977	-0.00018369	-2.842	-0.0026131	919.48641292536	48.573	0.67883	48.573	48.343	49.022	0					62	20	5	0	0	0	9.6015E-23	1	6716	241.32
HGVQELEIELQSQLSK	16	Unmodified	_HGVQELEIELQSQLSK_					0	0	0	0	CON__P35527	CON__P35527	CON__P35527	MULTI-MSMS	20140904-PurClathDigest-1ug-02	2	613.66	3	613.326657	1836.95814	26875.24	-3.5185	-0.002158	0.27158	0.00016657	-3.2469	-0.0019914	613.661345608822	48.583	0.48575	48.583	48.373	48.859	0					51	14	5	0	0	0	0.0057021	1	6724	65.231
HGVQELEIELQSQLSK	16	Unmodified	_HGVQELEIELQSQLSK_					0	0	0	0	CON__P35527	CON__P35527	CON__P35527	MULTI-MSMS	20140904-PurClathDigest-1ug-03	3	919.99	2	919.486347	1836.95814	22183.17	-2.9901	-0.0027494	-0.4215	-0.00038757	-3.4116	-0.003137	919.485997909563	48.659	0.75134	48.659	48.415	49.167	3.8147E-06					54	21	5	0	0	0	3.7511E-17	1	6462	233.37
HGVQELEIELQSQLSK	16	Unmodified	_HGVQELEIELQSQLSK_					0	0	0	0	CON__P35527	CON__P35527	CON__P35527	MULTI-MSMS	20140904-PurClathDigest-1ug-03	3	613.32	3	613.326657	1836.95814	26833.77	-3.8439	-0.0023575	0.58719	0.00036014	-3.2567	-0.0019974	613.661376905457	48.692	0.71825	48.692	48.479	49.198	0					61	20	5	0	0	0	0.00015604	1	6470	97.235
HLDFLK	6	Unmodified	_HLDFLK_					0	0	0	0	F1N1S2;F1MF27	F1N1S2	F1N1S2	MULTI-MSMS	20140904-PurClathDigest-1ug-01	1	386.72	2	386.721239	771.427924	33395.44	-5.0949	-0.0019703	-0.12497	-4.833E-05	-5.2198	-0.0020186	386.721155950519	40.022	0.39533	40.022	39.824	40.219	0					28	12	4	0	0	0	0.01172	1	5049	118.06
HLDFLK	6	Unmodified	_HLDFLK_					0	0	0	0	F1N1S2;F1MF27	F1N1S2	F1N1S2	MULTI-MSMS	20140904-PurClathDigest-1ug-02	2	386.72	2	386.721239	771.427924	33968.18	-5.0884	-0.0019678	-0.36959	-0.00014293	-5.458	-0.0021107	386.721066556235	40.471	0.25825	40.471	40.345	40.603	-3.8147E-06					23	7	4	0	0	0	0.01172	1	4678	118.06
HLDFLK	6	Unmodified	_HLDFLK_					0	0	0	0	F1N1S2;F1MF27	F1N1S2	F1N1S2	MULTI-MSMS	20140904-PurClathDigest-1ug-03	3	386.72	2	386.721239	771.427924	33561.85	-4.9232	-0.0019039	-0.41086	-0.00015889	-5.3341	-0.0020628	386.721020857964	40.508	0.32992	40.508	40.365	40.695	0					20	9	3	0	0	0	0.01172	1	4457	118.06
HLDFLKQPLATQK	13	Unmodified	_HLDFLKQPLATQK_					0	0	0	1	F1N1S2	F1N1S2	F1N1S2	MULTI-MSMS	20140904-PurClathDigest-1ug-02	2	513.63	3	513.627831	1537.86166	29357.83	-6.0316	-0.003098	0.71328	0.00036636	-5.3183	-0.0027316	513.628435734251	40.977	0.33958	40.977	40.805	41.145	0					29	10	4	0	0	0	0.0040111	1	4816	90.793
HLDFLKQPLATQK	13	Unmodified	_HLDFLKQPLATQK_					0	0	0	1	F1N1S2	F1N1S2	F1N1S2	MULTI-MSMS	20140904-PurClathDigest-1ug-03	3	513.96	3	513.627831	1537.86166	28573.03	-5.775	-0.0029662	0.13002	6.6779E-05	-5.645	-0.0028994	513.962381207709	41.004	0.28092	41.004	40.859	41.14	0					31	8	5	0	0	0	0.00079149	1	4582	102.87
HLDFLR	6	Unmodified	_HLDFLR_					0	0	0	0	F1N3M8;G3MYP5	F1N3M8;G3MYP5	G3MYP5	MULTI-MSMS	20140904-PurClathDigest-1ug-01	1	400.72	2	400.724313	799.434072	33510.21	-6.4263	-0.0025752	0.074501	2.9854E-05	-6.3518	-0.0025453	400.724322480081	40.277	0.73108	40.277	40.065	40.796	0					57	23	4	0	0	0	0.0031397	1	5096	166.66
HLDFLR	6	Unmodified	_HLDFLR_					0	0	0	0	F1N3M8;G3MYP5	F1N3M8;G3MYP5	G3MYP5	MULTI-MSMS	20140904-PurClathDigest-1ug-02	2	400.72	2	400.724313	799.434072	33379.4	-5.9269	-0.0023751	0.19682	7.8871E-05	-5.7301	-0.0022962	400.724338658989	40.787	0.70067	40.787	40.474	41.175	0					51	21	4	0	0	0	0.0022193	1	4738	175.34
HLDFLR	6	Unmodified	_HLDFLR_					0	0	0	0	F1N3M8;G3MYP5	F1N3M8;G3MYP5	G3MYP5	MULTI-MSMS	20140904-PurClathDigest-1ug-03	3	400.72	2	400.724313	799.434072	33478.39	-5.9813	-0.0023969	0.59639	0.00023899	-5.385	-0.0021579	400.724479041499	40.837	0.67592	40.837	40.464	41.14	0					55	20	4	0	0	0	0.0038818	1	4518	159.65
HLDRIDSVLLTHIGADNLPGINGLLQR	27	Deamidation (NQ)	_HLDRIDSVLLTHIGADNLPGIN(de)GLLQR_	HLDRIDSVLLTHIGADN(0.001)LPGIN(0.831)GLLQ(0.169)R		HLDRIDSVLLTHIGADN(-31.97)LPGIN(6.92)GLLQ(-6.92)R		0	1	0	1	F1N3M8;G3MYP5	F1N3M8;G3MYP5	G3MYP5	MULTI-MSMS	20140904-PurClathDigest-1ug-01	1	984.87	3	984.540227	2950.59885	20611.05	-3.1296	-0.0030813	0.53523	0.00052695	-2.5944	-0.0025543	984.874715463766	50.573	0.40866	50.573	50.4	50.809	0					38	12	4	0	0	0	0.0034516	1	7846	106.88
HLDRIDSVLLTHIGADNLPGINGLLQR	27	Deamidation (NQ)	_HLDRIDSVLLTHIGADNLPGIN(de)GLLQR_	HLDRIDSVLLTHIGADN(0.001)LPGIN(0.963)GLLQ(0.036)R		HLDRIDSVLLTHIGADN(-30.32)LPGIN(14.31)GLLQ(-14.31)R		0	1	0	1	F1N3M8;G3MYP5	F1N3M8;G3MYP5	G3MYP5	MULTI-MSMS	20140904-PurClathDigest-1ug-02	2	984.87	3	984.540227	2950.59885	21069.43	-2.9146	-0.0028696	1.1944	0.001176	-1.7202	-0.0016936	984.875708268861	50.727	0.37725	50.727	50.57	50.948	3.8147E-06					40	11	5	0	0	0	0.00010846	1	7248	120.42
HLDRIDSVLLTHIGADNLPGINGLLQR	27	Deamidation (NQ)	_HLDRIDSVLLTHIGADNLPGIN(de)GLLQR_	HLDRIDSVLLTHIGADNLPGIN(0.973)GLLQ(0.026)R		HLDRIDSVLLTHIGADN(-36.09)LPGIN(15.67)GLLQ(-15.67)R		0	1	0	1	F1N3M8;G3MYP5	F1N3M8;G3MYP5	G3MYP5	MULTI-MSMS	20140904-PurClathDigest-1ug-03	3	984.87	3	984.540227	2950.59885	20973.72	-3.8363	-0.003777	2.103	0.0020704	-1.7333	-0.0017065	984.876270469451	50.913	0.25134	50.913	50.792	51.044	3.8147E-06					34	7	6	0	0	0	8.5921E-05	1	7021	128.98
HLDRIDSVLLTHIGADNLPGINGLLQR	27	Unmodified	_HLDRIDSVLLTHIGADNLPGINGLLQR_					0	0	0	1	F1N3M8;G3MYP5	F1N3M8;G3MYP5	G3MYP5	MULTI-MSMS	20140904-PurClathDigest-1ug-01	1	738.91	4	738.410986	2949.61484	24600.26	-1.878	-0.0013868	1.3988	0.0010329	-0.47925	-0.00035388	738.663686882049	51.473	0.37517	51.473	51.26	51.635	0					49	11	7	0	0	0	0.052448	1	8078	28.128
HLDRVDSILLTHIGDDNLPGINSMLQR	27	Oxidation (M)	_HLDRVDSILLTHIGDDNLPGINSM(ox)LQR_		HLDRVDSILLTHIGDDNLPGINSM(1)LQR		HLDRVDSILLTHIGDDNLPGINSM(108.44)LQR	0	0	1	1	F1N1S2	F1N1S2	F1N1S2	MULTI-MSMS	20140904-PurClathDigest-1ug-01	1	1020.86	3	1020.19613	3057.56657	20917.87	-4.0383	-0.0041199	0.70968	0.00072401	-3.3286	-0.0033959	1020.53173758248	47.811	0.447	47.811	47.672	48.119	0					43	14	6	0	0	0	0.0013681	1	7117	108.44
HLDRVDSILLTHIGDDNLPGINSMLQR	27	Oxidation (M)	_HLDRVDSILLTHIGDDNLPGINSM(ox)LQR_		HLDRVDSILLTHIGDDNLPGINSM(1)LQR		HLDRVDSILLTHIGDDNLPGINSM(109.23)LQR	0	0	1	1	F1N1S2	F1N1S2	F1N1S2	MULTI-MSMS	20140904-PurClathDigest-1ug-02	2	1020.86	3	1020.19613	3057.56657	20829.03	-3.8974	-0.0039761	-0.010433	-1.0644E-05	-3.9079	-0.0039868	1020.53149540229	48.071	0.25134	48.071	47.937	48.188	0					25	7	4	0	0	0	0.0001894	1	6597	109.23
HLDRVDSILLTHIGDDNLPGINSMLQR	27	Oxidation (M)	_HLDRVDSILLTHIGDDNLPGINSM(ox)LQR_		HLDRVDSILLTHIGDDNLPGINSM(1)LQR		HLDRVDSILLTHIGDDNLPGINSM(69.58)LQR	0	0	1	1	F1N1S2	F1N1S2	F1N1S2	MULTI-MSMS	20140904-PurClathDigest-1ug-03	3	1020.53	3	1020.19613	3057.56657	20830.25	-3.7075	-0.0037824	0.22034	0.00022479	-3.4872	-0.0035576	1020.53109748816	48.098	0.35892	48.098	47.896	48.254	0					42	10	6	0	0	0	0.03467	1	6340	69.578
HLLGVEDLLQK	11	Unmodified	_HLLGVEDLLQK_					0	0	0	0	F1MYC9	F1MYC9	F1MYC9	MULTI-MSMS	20140904-PurClathDigest-1ug-01	1	632.87	2	632.86662	1263.71869	26700.59	-3.8721	-0.0024505	0.79059	0.00050034	-3.0815	-0.0019502	632.867109188758	46.491	0.39317	46.491	46.241	46.635	-3.8147E-06					36	12	4	0	0	0	5.2925E-09	1	6766	202.03
HLLGVEDLLQK	11	Unmodified	_HLLGVEDLLQK_					0	0	0	0	F1MYC9	F1MYC9	F1MYC9	MULTI-MSMS	20140904-PurClathDigest-1ug-02	2	632.87	2	632.86662	1263.71869	26442.23	-4.3364	-0.0027443	2.0325	0.0012863	-2.3038	-0.001458	632.867857807568	46.906	0.37175	46.906	46.692	47.064	0					31	11	4	0	0	0	5.3005E-07	1	6320	189.57
HLLGVEDLLQK	11	Unmodified	_HLLGVEDLLQK_					0	0	0	0	F1MYC9	F1MYC9	F1MYC9	MULTI-MSMS	20140904-PurClathDigest-1ug-03	3	632.86	2	632.86662	1263.71869	25960.42	-4.1361	-0.0026176	0.84055	0.00053196	-3.2955	-0.0020856	632.867010233588	46.865	0.37317	46.865	46.688	47.061	0					25	11	3	0	0	0	3.524E-06	1	6054	159.09
HLLPVETQR	9	Unmodified	_HLLPVETQR_					0	0	0	0	E1BDX8	E1BDX8	E1BDX8	MULTI-MSMS	20140904-PurClathDigest-1ug-01	1	546.81	2	546.811648	1091.60874	27870.43	-6.5015	-0.0035551	-1.2222	-0.00066833	-7.7238	-0.0042234	546.811771420664	36.613	0.57817	36.613	36.4	36.978	0					41	17	3	0	0	0	0.00049592	1	4148	125.16
HLQEALK	7	Unmodified	_HLQEALK_					0	0	0	0	F1N3M8;G3MYP5	F1N3M8;G3MYP5	G3MYP5	MULTI-MSMS	20140904-PurClathDigest-1ug-01	1	419.74	2	419.742702	837.470852	33116.44	-7.2705	-0.0030517	0.1436	6.0274E-05	-7.1269	-0.0029915	419.742715971251	31.712	0.47383	31.712	31.558	32.032	0					36	14	4	0	0	0	0.0051974	1	2899	134.08
HLQEALK	7	Unmodified	_HLQEALK_					0	0	0	0	F1N3M8;G3MYP5	F1N3M8;G3MYP5	G3MYP5	MULTI-MSMS	20140904-PurClathDigest-1ug-02	2	419.74	2	419.742702	837.470852	32571.73	-7.4441	-0.0031246	-0.016156	-6.7812E-06	-7.4602	-0.0031314	419.742674878745	31.796	0.69634	31.796	31.524	32.22	1.9073E-06					44	19	4	0	0	0	0.0057112	1	2642	129.56
HLQEALK	7	Unmodified	_HLQEALK_					0	0	0	0	F1N3M8;G3MYP5	F1N3M8;G3MYP5	G3MYP5	MULTI-MSMS	20140904-PurClathDigest-1ug-03	3	419.74	2	419.742702	837.470852	32539.75	-7.8176	-0.0032814	0.095907	4.0256E-05	-7.7217	-0.0032411	419.742695645277	31.876	0.62758	31.876	31.698	32.325	0					36	16	4	0	0	0	0.008116	1	2504	110.03
HLQEYQDLLNVK	12	Unmodified	_HLQEYQDLLNVK_					0	0	0	0	Q28115	Q28115	Q28115	MULTI-MSMS	20140904-PurClathDigest-1ug-01	1	750.39	2	750.396273	1498.77799	24145.03	-4.8106	-0.0036099	-0.18928	-0.00014204	-4.9999	-0.0037519	750.39601096476	43.289	0.71233	43.289	43.135	43.848	0					68	23	6	0	0	0	2.3658E-09	1	5905	211.96
HLQEYQDLLNVK	12	Unmodified	_HLQEYQDLLNVK_					0	0	0	0	Q28115	Q28115	Q28115	MULTI-MSMS	20140904-PurClathDigest-1ug-01	1	500.6	3	500.599941	1498.77799	30070.62	-5.1534	-0.0025798	0.67397	0.00033739	-4.4794	-0.0022424	500.600311625691	43.282	0.26292	43.282	43.135	43.398	0					35	8	6	0	0	0	8.7634E-05	1	5910	113.22
HLQEYQDLLNVK	12	Unmodified	_HLQEYQDLLNVK_					0	0	0	0	Q28115	Q28115	Q28115	MULTI-MSMS	20140904-PurClathDigest-1ug-02	2	750.39	2	750.396273	1498.77799	24162.07	-4.451	-0.00334	-0.57822	-0.00043389	-5.0292	-0.0037739	750.39577938818	43.682	0.72975	43.682	43.42	44.149	-3.8147E-06					75	22	6	0	0	0	7.3697E-10	1	5476	217.88
HLQEYQDLLNVK	12	Unmodified	_HLQEYQDLLNVK_					0	0	0	0	Q28115	Q28115	Q28115	MULTI-MSMS	20140904-PurClathDigest-1ug-02	2	500.6	3	500.599941	1498.77799	29891.77	-4.9263	-0.0024661	0.25632	0.00012831	-4.67	-0.0023378	500.59996576475	43.678	0.541	43.678	43.514	44.055	0					40	16	5	0	0	0	0.001704	1	5487	91.961
HLQEYQDLLNVK	12	Unmodified	_HLQEYQDLLNVK_					0	0	0	0	Q28115	Q28115	Q28115	MULTI-MSMS	20140904-PurClathDigest-1ug-03	3	750.39	2	750.396273	1498.77799	24107.49	-5.5376	-0.0041554	-0.12823	-9.6225E-05	-5.6659	-0.0042517	750.396137115159	43.847	0.77825	43.847	43.611	44.389	3.8147E-06					42	23	2	0	0	0	1.8426E-10	1	5264	219.89
HLQEYQDLLNVK	12	Unmodified	_HLQEYQDLLNVK_					0	0	0	0	Q28115	Q28115	Q28115	MULTI-MSMS	20140904-PurClathDigest-1ug-03	3	500.6	3	500.599941	1498.77799	29832.49	-5.1003	-0.0025532	-0.060888	-3.0481E-05	-5.1612	-0.0025837	500.599795874585	43.829	0.32117	43.829	43.643	43.964	-3.8147E-06					32	9	4	0	0	0	0.0023605	1	5274	84.479
HMDPPPAPMQDR	12	2 Oxidation (M)	_HM(ox)DPPPAPM(ox)QDR_		HM(1)DPPPAPM(1)QDR		HM(77.67)DPPPAPM(77.67)QDR	0	0	2	0	F1N1S2	F1N1S2	F1N1S2	MULTI-MSMS	20140904-PurClathDigest-1ug-01	1	712.3	2	712.308286	1422.60202	24062	-6.2026	-0.0044181	0.64636	0.00046041	-5.5562	-0.0039577	712.309336532179	30.943	0.64417	30.943	30.668	31.312	0					43	19	4	0	0	0	0.0061504	1	2710	77.674
HMDPPPAPMQDR	12	2 Oxidation (M)	_HM(ox)DPPPAPM(ox)QDR_		HM(1)DPPPAPM(1)QDR		HM(74.39)DPPPAPM(74.39)QDR	0	0	2	0	F1N1S2	F1N1S2	F1N1S2	MULTI-MSMS	20140904-PurClathDigest-1ug-02	2	712.3	2	712.308286	1422.60202	25051.74	-5.3291	-0.003796	1.099	0.00078285	-4.2301	-0.0030131	712.309316151655	30.903	0.60316	30.903	30.646	31.249	1.9073E-06					38	16	4	0	0	0	0.0055322	1	2448	74.392
HMDPPPAPMQDR	12	2 Oxidation (M)	_HM(ox)DPPPAPM(ox)QDR_		HM(1)DPPPAPM(1)QDR		HM(80.87)DPPPAPM(80.87)QDR	0	0	2	0	F1N1S2	F1N1S2	F1N1S2	MULTI-MSMS	20140904-PurClathDigest-1ug-03	3	712.3	2	712.308286	1422.60202	24972.55	-4.6314	-0.003299	0.15291	0.00010892	-4.4785	-0.0031901	712.30906357494	30.939	0.61983	30.939	30.705	31.324	-1.9073E-06					41	15	4	0	0	0	0.0076109	1	2317	80.871
HNHDLSSYQDTIQQLENELR	20	Unmodified	_HNHDLSSYQDTIQQLENELR_					0	0	0	0	F1MDZ2;O77788	F1MDZ2	F1MDZ2	MULTI-MSMS	20140904-PurClathDigest-1ug-01	1	814.39	3	814.054436	2439.14148	23082.67	-2.9372	-0.002391	0.78782	0.00064133	-2.1494	-0.0017497	814.388986645827	50.412	0.874	50.412	50.088	50.962	0					104	27	7	0	0	0	1.4155E-08	1	7784	119.37
HNHDLSSYQDTIQQLENELR	20	Unmodified	_HNHDLSSYQDTIQQLENELR_					0	0	0	0	F1MDZ2;O77788	F1MDZ2	F1MDZ2	MULTI-MSMS	20140904-PurClathDigest-1ug-01	1	611.04	4	610.792646	2439.14148	26691.57	-3.1344	-0.0019145	1.2476	0.00076205	-1.8868	-0.0011524	611.044141893704	50.413	0.59283	50.413	50.182	50.775	0					82	18	8	0	0	0	5.011E-06	1	7786	103.9
HNHDLSSYQDTIQQLENELR	20	Unmodified	_HNHDLSSYQDTIQQLENELR_					0	0	0	0	F1MDZ2;O77788	F1MDZ2	F1MDZ2	MULTI-MSMS	20140904-PurClathDigest-1ug-01	1	1221.08	2	1220.57802	2439.14148	19153.92	-4.6575	-0.0056848	2.2456	0.0027409	-2.4119	-0.0029439	1221.08177692431	50.405	0.40625	50.405	50.213	50.62	0					57	12	6	0	0	0	1.3228E-08	1	7787	131.09
HNHDLSSYQDTIQQLENELR	20	Unmodified	_HNHDLSSYQDTIQQLENELR_					0	0	0	0	F1MDZ2;O77788	F1MDZ2	F1MDZ2	MULTI-MSMS	20140904-PurClathDigest-1ug-02	2	814.39	3	814.054436	2439.14148	22955.77	-2.4197	-0.0019697	-0.53555	-0.00043597	-2.9552	-0.0024057	814.387959907246	50.539	0.74617	50.539	50.337	51.084	0					99	22	7	0	0	0	1.1833E-13	1	7171	156.08
HNHDLSSYQDTIQQLENELR	20	Unmodified	_HNHDLSSYQDTIQQLENELR_					0	0	0	0	F1MDZ2;O77788	F1MDZ2	F1MDZ2	MULTI-MSMS	20140904-PurClathDigest-1ug-02	2	611.04	4	610.792646	2439.14148	26592.65	-2.5739	-0.0015721	-0.353	-0.00021561	-2.9269	-0.0017878	611.043191633011	50.522	0.71117	50.522	50.305	51.016	0					75	21	6	0	0	0	4.3387E-13	1	7175	149.95
HNHDLSSYQDTIQQLENELR	20	Unmodified	_HNHDLSSYQDTIQQLENELR_					0	0	0	0	F1MDZ2;O77788	F1MDZ2	F1MDZ2	MULTI-MSMS	20140904-PurClathDigest-1ug-02	2	1221.08	2	1220.57802	2439.14148	19135.8	-3.4836	-0.0042521	-0.081329	-9.9268E-05	-3.565	-0.0043513	1221.07938009388	50.529	0.45375	50.529	50.305	50.759	0					59	13	6	0	0	0	5.1831E-18	1	7176	190.83
HNHDLSSYQDTIQQLENELR	20	Unmodified	_HNHDLSSYQDTIQQLENELR_					0	0	0	0	F1MDZ2;O77788	F1MDZ2	F1MDZ2	MULTI-MSMS	20140904-PurClathDigest-1ug-03	3	814.39	3	814.054436	2439.14148	22850.59	-2.8907	-0.0023532	0.10514	8.5586E-05	-2.7855	-0.0022676	814.388352014501	50.695	1.0452	50.695	50.425	51.47	0					99	31	7	0	0	0	4.1794E-09	2	6936	135.91
HNHDLSSYQDTIQQLENELR	20	Unmodified	_HNHDLSSYQDTIQQLENELR_					0	0	0	0	F1MDZ2;O77788	F1MDZ2	F1MDZ2	MULTI-MSMS	20140904-PurClathDigest-1ug-03	3	611.04	4	610.792646	2439.14148	26683.15	-3.1298	-0.0019117	0.43955	0.00026847	-2.6903	-0.0016432	611.04360044754	50.682	0.77958	50.682	50.457	51.237	0					81	23	7	0	0	0	1.6859E-08	1	6941	115.57
HNHDLSSYQDTIQQLENELR	20	Unmodified	_HNHDLSSYQDTIQQLENELR_					0	0	0	0	F1MDZ2;O77788	F1MDZ2	F1MDZ2	MULTI-MSMS	20140904-PurClathDigest-1ug-03	3	1221.07	2	1220.57802	2439.14148	19324.2	-3.4682	-0.0042332	-0.13891	-0.00016955	-3.6071	-0.0044027	1221.07910126897	50.684	0.46275	50.684	50.489	50.951	3.8147E-06					61	13	6	0	0	0	2.0283E-08	1	6946	123.6
HNIMDFAMPYFIQVMK	16	3 Oxidation (M)	_HNIM(ox)DFAM(ox)PYFIQVM(ox)K_		HNIM(1)DFAM(1)PYFIQVM(1)K		HNIM(85.74)DFAM(85.74)PYFIQVM(85.74)K	0	0	3	0	P49951;F1MPU0	P49951	P49951	MULTI-MSMS	20140904-PurClathDigest-1ug-01	1	1017.47	2	1016.97011	2031.92566	20832.79	-4.1678	-0.0042385	-1.2557	-0.001277	-5.4234	-0.0055155	1017.47088560757	46.831	1.3613	46.831	46.517	47.878	0					255	44	8	0	0	0	0.0046615	4	6803	85.742
HNIMDFAMPYFIQVMK	16	3 Oxidation (M)	_HNIM(ox)DFAM(ox)PYFIQVM(ox)K_		HNIM(1)DFAM(1)PYFIQVM(1)K		HNIM(48.39)DFAM(48.39)PYFIQVM(48.39)K	0	0	3	0	P49951;F1MPU0	P49951	P49951	MULTI-MSMS	20140904-PurClathDigest-1ug-01	1	678.65	3	678.31583	2031.92566	25269.64	-4.3128	-0.0029255	-0.92254	-0.00062577	-5.2354	-0.0035512	678.649952127343	46.839	2.5104	46.839	46.517	49.027	3.8147E-06					306	82	8	0	0	0	0.043301	1	6805	48.391
HNIMDFAMPYFIQVMK	16	3 Oxidation (M)	_HNIM(ox)DFAM(ox)PYFIQVM(ox)K_		HNIM(1)DFAM(1)PYFIQVM(1)K		HNIM(79.39)DFAM(79.39)PYFIQVM(79.39)K	0	0	3	0	P49951;F1MPU0	P49951	P49951	MULTI-MSMS	20140904-PurClathDigest-1ug-02	2	1017.47	2	1016.97011	2031.92566	20985.28	-4.4236	-0.0044987	-0.58969	-0.0005997	-5.0133	-0.0050984	1017.47161249397	47.127	1.2762	47.127	46.848	48.125	0					215	39	8	0	0	0	0.013329	3	6322	79.394
HNIMDFAMPYFIQVMK	16	3 Oxidation (M)	_HNIM(ox)DFAM(ox)PYFIQVM(ox)K_		HNIM(1)DFAM(1)PYFIQVM(1)K		HNIM(56.51)DFAM(56.51)PYFIQVM(56.51)K	0	0	3	0	P49951;F1MPU0	P49951	P49951	MULTI-MSMS	20140904-PurClathDigest-1ug-02	2	678.65	3	678.31583	2031.92566	25625.54	-4.664	-0.0031637	-0.10746	-7.2894E-05	-4.7715	-0.0032366	678.650474826935	47.13	1.4018	47.13	46.848	48.25	0					233	43	9	0	0	0	0.029215	1	6323	56.514
HNIMDFAMPYFIQVMK	16	3 Oxidation (M)	_HNIM(ox)DFAM(ox)PYFIQVM(ox)K_		HNIM(1)DFAM(1)PYFIQVM(1)K		HNIM(84.51)DFAM(84.51)PYFIQVM(84.51)K	0	0	3	0	P49951;F1MPU0	P49951	P49951	MULTI-MSMS	20140904-PurClathDigest-1ug-03	3	1017.47	2	1016.97011	2031.92566	20915.15	-4.4571	-0.0045328	-0.85819	-0.00087275	-5.3153	-0.0054055	1017.47126474885	46.984	2.5107	46.984	46.718	49.229	-3.8147E-06					243	75	7	0	0	0	0.014559	4	6025	84.508
HNIMDFAMPYFIQVMK	16	3 Oxidation (M)	_HNIM(ox)DFAM(ox)PYFIQVM(ox)K_		HNIM(1)DFAM(1)PYFIQVM(1)K		HNIM(48.9)DFAM(48.9)PYFIQVM(48.9)K	0	0	3	0	P49951;F1MPU0	P49951	P49951	MULTI-MSMS	20140904-PurClathDigest-1ug-03	3	678.65	3	678.31583	2031.92566	25384.7	-4.3765	-0.0029686	-0.74323	-0.00050414	-5.1197	-0.0034728	678.650004816906	46.985	2.5763	46.985	46.718	49.294	3.8147E-06					285	77	9	0	0	0	0.042422	3	6026	48.899
HNIMDFAMPYFIQVMK	16	2 Oxidation (M)	_HNIM(ox)DFAM(ox)PYFIQVMK_		HNIM(1)DFAM(1)PYFIQVMK		HNIM(100.32)DFAM(82.06)PYFIQVM(-82.06)K	0	0	2	0	P49951;F1MPU0	P49951	P49951	MULTI-MSMS	20140904-PurClathDigest-1ug-01	1	1009.47	2	1008.97265	2015.93075	20983.89	-3.0876	-0.0031153	-0.27952	-0.00028202	-3.3672	-0.0033974	1009.47442045408	49.873	1.0107	49.873	49.609	50.62	0					158	32	7	0	0	0	9.8918E-05	3	7625	112.24
HNIMDFAMPYFIQVMK	16	2 Oxidation (M)	_HNIM(ox)DFAM(ox)PYFIQVMK_		HNIM(1)DFAM(1)PYFIQVMK		HNIM(96.34)DFAM(84.61)PYFIQVM(-84.61)K	0	0	2	0	P49951;F1MPU0	P49951	P49951	MULTI-MSMS	20140904-PurClathDigest-1ug-02	2	1009.47	2	1008.97265	2015.93075	20877.9	-2.5617	-0.0025847	-0.69033	-0.00069652	-3.252	-0.0032812	1009.47399930513	50.206	0.99442	50.206	49.921	50.916	0					151	30	7	0	0	0	0.00019987	3	7075	105.14
HNIMDFAMPYFIQVMK	16	2 Oxidation (M)	_HNIM(ox)DFAM(ox)PYFIQVMK_		HNIM(1)DFAM(1)PYFIQVMK		HNIM(67.5)DFAM(51.93)PYFIQVM(-51.93)K	0	0	2	0	P49951;F1MPU0	P49951	P49951	MULTI-MSMS	20140904-PurClathDigest-1ug-03	3	673.32	3	672.984192	2015.93075	25359.81	-1.8995	-0.0012783	-0.67381	-0.00045346	-2.5733	-0.0017318	673.318338894381	50.378	1.3248	50.378	49.88	51.204	0					178	40	8	0	0	0	0.0055544	1	6841	71.98
HNIMDFAMPYFIQVMK	16	2 Oxidation (M)	_HNIM(ox)DFAM(ox)PYFIQVMK_		HNIM(1)DFAM(1)PYFIQVMK		HNIM(101.55)DFAM(80.5)PYFIQVM(-80.5)K	0	0	2	0	P49951;F1MPU0	P49951	P49951	MULTI-MSMS	20140904-PurClathDigest-1ug-03	3	1009.47	2	1008.97265	2015.93075	20889.05	-2.3659	-0.0023871	-0.65674	-0.00066263	-3.0226	-0.0030497	1009.47405042746	50.384	0.93767	50.384	50.106	51.044	0					147	28	7	0	0	0	1.8767E-05	2	6849	110.35
HNIMDFAMPYFIQVMK	16	Oxidation (M)	_HNIMDFAM(ox)PYFIQVMK_		HNIM(0.066)DFAM(0.934)PYFIQVMK		HNIM(-11.49)DFAM(11.49)PYFIQVM(-52.85)K	0	0	1	0	P49951;F1MPU0	P49951	P49951	MULTI-SECPEP	20140904-PurClathDigest-1ug-01	1	1001.48	2	1000.97519	1999.93583	20617.53	-3.1141	-0.0031171	-0.28076	-0.00028103	-3.3948	-0.0033981	1000.9752229779	53.81	0.49375	53.81	53.572	54.066	-3.8147E-06					23	15	2	0	0	0	0.0083956	1	8692	72.898
HNIMDFAMPYFIQVMK	16	Oxidation (M)	_HNIM(ox)DFAMPYFIQVMK_		HNIM(0.993)DFAM(0.007)PYFIQVMK		HNIM(21.47)DFAM(-21.47)PYFIQVM(-100.25)K	0	0	1	0	P49951;F1MPU0	P49951	P49951	MULTI-MSMS	20140904-PurClathDigest-1ug-02	2	1001.47	2	1000.97519	1999.93583	21437.73	-2.8061	-0.0028088	-1.985	-0.0019869	-4.7911	-0.0047957	1001.47420136042	53.389	0.71542	53.389	53.049	53.765	0					57	19	4	0	0	0	0.00018205	1	7872	112.17
HQADIASYQEAIQQLDAELR	20	Unmodified	_HQADIASYQEAIQQLDAELR_					0	0	0	0	F1MSQ6	F1MSQ6	F1MSQ6	MULTI-MSMS	20140904-PurClathDigest-1ug-01	1	767.38	3	767.048622	2298.12404	24326.67	-1.2344	-0.00094686	-0.58431	-0.0004482	-1.8187	-0.0013951	767.382512619568	51.57	0.68142	51.57	51.293	51.974	0					76	21	6	0	0	0	9.5611E-06	1	8082	81.807
HQADIASYQEAIQQLDAELR	20	Unmodified	_HQADIASYQEAIQQLDAELR_					0	0	0	0	F1MSQ6	F1MSQ6	F1MSQ6	MULTI-MSMS	20140904-PurClathDigest-1ug-01	1	1150.57	2	1150.0693	2298.12404	19584.56	-1.6528	-0.0019008	-0.248	-0.00028522	-1.9008	-0.0021861	1150.57055316211	51.57	0.49275	51.57	51.358	51.85	3.8147E-06					56	15	5	0	0	0	6.0186E-22	1	8083	217.82
HQADIASYQEAIQQLDAELR	20	Unmodified	_HQADIASYQEAIQQLDAELR_					0	0	0	0	F1MSQ6	F1MSQ6	F1MSQ6	MULTI-MSMS	20140904-PurClathDigest-1ug-02	2	767.38	3	767.048622	2298.12404	24163.54	-1.4925	-0.0011448	-0.0052769	-4.0477E-06	-1.4977	-0.0011488	767.383018465179	51.619	0.48283	51.619	51.472	51.955	0					60	14	6	0	0	0	1.232E-08	1	7452	125.79
HQADIASYQEAIQQLDAELR	20	Unmodified	_HQADIASYQEAIQQLDAELR_					0	0	0	0	F1MSQ6	F1MSQ6	F1MSQ6	MULTI-MSMS	20140904-PurClathDigest-1ug-02	2	1150.57	2	1150.0693	2298.12404	20097.17	-2.1945	-0.0025239	0.71488	0.00082216	-1.4797	-0.0017017	1150.57184888834	51.615	0.60741	51.615	51.314	51.921	0					63	18	7	0	0	0	2.1422E-27	1	7459	249.28
HQADIASYQEAIQQLDAELR	20	Unmodified	_HQADIASYQEAIQQLDAELR_					0	0	0	0	F1MSQ6	F1MSQ6	F1MSQ6	MULTI-MSMS	20140904-PurClathDigest-1ug-03	3	767.38	3	767.048622	2298.12404	24220.74	-1.1648	-0.00089347	-0.758	-0.00058143	-1.9228	-0.0014749	767.382400747283	51.647	0.49517	51.647	51.501	51.996	0					62	14	7	0	0	0	1.6043E-08	1	7186	119.62
HQADIASYQEAIQQLDAELR	20	Unmodified	_HQADIASYQEAIQQLDAELR_					0	0	0	0	F1MSQ6	F1MSQ6	F1MSQ6	MULTI-MSMS	20140904-PurClathDigest-1ug-03	3	1150.57	2	1150.0693	2298.12404	19692.4	-2.2938	-0.002638	0.62013	0.00071319	-1.6737	-0.0019248	1150.57180417154	51.643	0.32558	51.643	51.501	51.827	0					38	9	5	0	0	0	1.2188E-54	1	7188	327.31
HQAFEAELSANQSR	14	Unmodified	_HQAFEAELSANQSR_					0	0	0	0	E1BFB0	E1BFB0	E1BFB0	MULTI-MSMS	20140904-PurClathDigest-1ug-02	2	794.38	2	794.379143	1586.74373	23978.24	-4.6352	-0.0036821	1.3304	0.0010569	-3.3047	-0.0026252	794.380431133523	37.755	0.44525	37.755	37.598	38.043	0					22	12	2	0	0	0	6.007E-08	1	4030	153.94
[truncated: 2,481 more rows]
[truncated: 14 more columns]
