# Supplementary material for: The ∼16 kDa C-Terminal Sequence of Clathrin Assembly Protein AP180 Is Essential for Efficient Clathrin Binding
Source: PLoS One. 2014 Oct 20;9(10):e110557. doi: 10.1371/journal.pone.0110557 (PMC4203807; doi:10.1371/journal.pone.0110557)
Supplement: Data S2 — Contains the tabulated output of the MaxQuant software from processing the LC-MS/MS data of the tryptic digestion of purified clathrin. (ZIP) [file pone.0110557.s003.zip › txt/modificationSpecificPeptides.txt]

Sequence	Modifications	Mass	Mass Fractional Part	Protein Groups	Proteins	Unique (Groups)	Unique (Proteins)	Acetyl (Protein N-term)	Deamidation (NQ)	Oxidation (M)	Missed cleavages	Experiment 1	Experiment 2	Experiment 3	Retention time	Calibrated retention time	Charges	PEP	MS/MS count	MS/MS scan number	Raw file	Score	Delta score	Intensity	Intensity 1	Intensity 2	Intensity 3	Reverse	Contaminant	id	Protein group IDs	Peptide ID	Evidence IDs	MS/MS IDs	Best MS/MS	Deamidation (NQ) site IDs	Oxidation (M) site IDs
AAEQAHLWAELVFLYDKYEEYDNAIITMMNHPTDAWK	2 Oxidation (M)	4458.0613	0.061309573	38	P49951;F1MPU0	yes	no	0	0	2	1	3	1	2	59.352	59.352	3;4	0.0011596	13	8754	20140904-PurClathDigest-1ug-02	99.562	99.547	267510000	179570000	58950000	28987000			0	38	0	0;1;2;3;4;5	0;1;2;3;4;5;6;7;8;9;10;11;12	8		136;137
AAKDEVSESR	Unmodified	1090.5255	0.52546627	32	P02548	yes	yes	0	0	0	1	2	2	2	30.39	30.39	2;3	2.7783E-06	6	2585	20140904-PurClathDigest-1ug-01	125.74	84.337	41564000	18554000	16327000	6683600			1	32	1	6;7;8;9;10;11	13;14;15;16;17;18	14
AAKDEVSESRR	Unmodified	1246.6266	0.6265773	32	P02548	yes	yes	0	0	0	2	1	1	1	30.301	30.301	3	0.00054758	3	2556	20140904-PurClathDigest-1ug-01	142.08	107.82	59089000	41729000	12653000	4706800			2	32	2	12;13;14	19;20;21	19
AALLELWELR	Unmodified	1212.6867	0.68665836	7	E1BFB0	yes	yes	0	0	0	0	1		1	54.748	54.748	2	0.0002195	2	7957	20140904-PurClathDigest-1ug-03	137.98	119.35	6944500	4930000	0	2014400			3	7	3	15;16	22;23	23
AAMGELYER	Oxidation (M)	1054.4753	0.47534495	19	F1MSQ6	yes	yes	0	0	1	0		1	1	35.534	35.534	2	0.011558	2	3509	20140904-PurClathDigest-1ug-02	119.75	104.54	39075000	0	24744000	14331000			4	19	4	17;18	24;25	24		72
AATASPPTDGTSGYSAR	Unmodified	1608.738	0.73797824	29;24	F1N3M8;G3MYP5	no	no	0	0	0	0	1	1	1	34.406	34.406	2	3.1609E-08	3	3069	20140904-PurClathDigest-1ug-03	153.72	132.92	106300000	58468000	23984000	23847000			5	24;29	5	19;20;21	26;27;28	28
AAVTDVQR	Unmodified	858.45593	0.45593014	41	Q0P5A1	yes	yes	0	0	0	0	1	1	1	32.94	32.94	2	0.027448	3	3188	20140904-PurClathDigest-1ug-01	89.752	30.835	15594000	6783100	4545600	4265800			6	41	6	22;23;24	29;30;31	29
ADDPSSYMEVVQAANTSGNWEELVK	Unmodified	2739.2334	0.23338993	38	P49951;F1MPU0	yes	no	0	0	0	0	1	1		52.889	52.889	2	0.00032281	2	8406	20140904-PurClathDigest-1ug-01	88.976	88.647	111550000	77565000	33982000	0			7	38	7	25;26	32;33	32
ADDPSSYMEVVQAANTSGNWEELVK	Oxidation (M);Deamidation (NQ)	2756.2123	0.21232014	38	P49951;F1MPU0	yes	no	0	1	1	0		1		49.621	49.621	2	0.027634	1	6950	20140904-PurClathDigest-1ug-02	62.193	61.665	42098000	0	42098000	0			8	38	7	27	34	34	21	138
ADITDDSPDGKLPASSFSPTALLGEGR	Unmodified	2716.3192	0.31916847	29;24	F1N3M8;G3MYP5	no	no	0	0	0	1	1	1	1	49.417	49.417	2	0.011294	3	6710	20140904-PurClathDigest-1ug-03	93.166	92.645	25852000	14097000	6307400	5447600			9	24;29	8	28;29;30	35;36;37	37
ADLEMQIESLTEELAYLKK	Oxidation (M)	2239.1294	0.12936578	2	CON__P13645	yes	yes	0	0	1	1	1	1		56.925	56.925	3	8.0676E-09	2	9346	20140904-PurClathDigest-1ug-01	156.13	29.291	22182000	13014000	9168700	0		+	10	2	9	31;32	38;39	38		3
AEAESLYQSK	Unmodified	1124.535	0.53496832	1	CON__P04264	yes	yes	0	0	0	0			1	35.576	35.576	2	0.00010361	1	3347	20140904-PurClathDigest-1ug-03	160.53	113.34	4058100	0	0	4058100		+	11	1	10	33	40	40
AEALEQTIK	Unmodified	1001.5393	0.53932542	29;24	F1N3M8;G3MYP5	no	no	0	0	0	0	1	1	1	37.047	37.047	2	0.0004745	3	3868	20140904-PurClathDigest-1ug-02	149.72	100.93	56019000	28718000	16778000	10523000			12	24;29	11	34;35;36	41;42;43	42
AEEVAPKEELAAEAK	Unmodified	1583.8043	0.80426689	12	F1MDZ2;O77788	yes	no	0	0	0	1	2	1	1	36.103	36.103	2;3	2.3323E-05	4	3650	20140904-PurClathDigest-1ug-02	143.88	79.838	155260000	110240000	24273000	20751000			13	12	12	37;38;39;40	44;45;46;47	46
AEIENYILTYK	Unmodified	1355.6973	0.69728262	9	E1BKN2	yes	yes	0	0	0	0		1	1	47.932	47.932	2	0.00096958	2	6555	20140904-PurClathDigest-1ug-02	111.63	104.93	21538000	0	13269000	8268800			14	9	13	41;42	48;49	48
AEITDAEGLGLK	Unmodified	1215.6347	0.63468237	16	F1MIC9	yes	yes	0	0	0	0	1			42.346	42.346	2	0.0045322	1	5662	20140904-PurClathDigest-1ug-01	98.105	53.787	5145300	5145300	0	0			15	16	14	43	50	50
AEMMELNDR	2 Oxidation (M)	1139.4587	0.45870861	43	Q28115	yes	yes	0	0	2	0	1	1	1	32.219	32.219	2	0.0028115	3	3004	20140904-PurClathDigest-1ug-01	120.33	87.142	131840000	67072000	36397000	28370000			16	43	15	44;45;46	51;52;53	51		170;171
AEMMELNDR	2 Oxidation (M);Deamidation (NQ)	1140.4427	0.4427242	43	Q28115	yes	yes	0	1	2	0	1			32.888	32.888	2	0.055483	1	3212	20140904-PurClathDigest-1ug-01	58.699	57.104	1395900	1395900	0	0			17	43	15	47	54	54	55	170;171
AEPAEAQSEEEEIEAQGEYDK	Unmodified	2350.9925	0.99247418	13	F1MEW3	yes	yes	0	0	0	0	1	1	1	41.47	41.47	2	3.6689E-14	4	5363	20140904-PurClathDigest-1ug-01	164.94	164.91	94119000	43497000	30174000	20448000			18	13	16	48;49;50	55;56;57;58	55
AEPAEAQSEEEEIEAQGEYDKLLFR	Unmodified	2880.3301	0.33012709	13	F1MEW3	yes	yes	0	0	0	1		2	2	49.543	49.543	2;3	9.1957E-05	4	6925	20140904-PurClathDigest-1ug-02	107.75	107.6	72470000	0	37814000	34656000			19	13	17	51;52;53;54	59;60;61;62	60
AEPELDLAVK	Unmodified	1083.5812	0.58119023	13	F1MEW3	yes	yes	0	0	0	0	1		1	42.701	42.701	2	0.022104	2	5021	20140904-PurClathDigest-1ug-03	76.228	47.272	13729000	9250200	0	4478400			20	13	18	55;56	63;64	64
AESLQQEAEVLR	Unmodified	1371.6994	0.69940789	16	F1MIC9	yes	yes	0	0	0	0	1		1	43.074	43.074	2	5.8977E-09	2	5133	20140904-PurClathDigest-1ug-03	198.32	164.32	33471000	28866000	0	4605200			21	16	19	57;58	65;66	66
AESPVKEEVPAKPVK	Unmodified	1606.893	0.89302232	12	F1MDZ2;O77788	yes	no	0	0	0	2	1	2	1	33.318	33.318	3;4	0.00045892	4	2852	20140904-PurClathDigest-1ug-03	120.7	120.02	14005000	7416900	4327600	2260300			22	12	20	59;60;61;62	67;68;69;70	70
AFLQGGQEASDIALLLR	Unmodified	1800.9734	0.9733979	16	F1MIC9	yes	yes	0	0	0	0	1	1	1	53.8	53.8	2	5.4375E-17	3	7720	20140904-PurClathDigest-1ug-03	215.23	196.29	21335000	12878000	5074000	3383200			23	16	21	63;64;65	71;72;73	73
AFMTADLPNELIELLEK	Oxidation (M);Deamidation (NQ)	1962.986	0.985996	38	P49951;F1MPU0	yes	no	0	1	1	0	1	1	1	56.139	56.139	2	0.002658	3	9170	20140904-PurClathDigest-1ug-01	86.005	83.226	49797000	27923000	15014000	6859800			24	38	22	66;67;68	74;75;76	74	22	139
AFMTADLPNELIELLEK	Oxidation (M)	1962.002	0.00198042	38	P49951;F1MPU0	yes	no	0	0	1	0	2			58.515	58.515	2;3	0.02991	2	9724	20140904-PurClathDigest-1ug-01	40.493	38.758	167760000	167760000	0	0			25	38	22	69;70	77;78	77		139
AFSTQMSITAGQK	Unmodified	1368.6708	0.6707503	26	F1N757	yes	yes	0	0	0	0			1	41.086	41.086	2	0.038856	1	4593	20140904-PurClathDigest-1ug-03	50.354	33.581	14724000	0	0	14724000			26	26	23	71	79	79
AFVHWYVGEGMEEGEFSEAR	Oxidation (M)	2345.0059	0.005896599	44	Q2HJ86;F2Z4C1;F6RP72;F2Z4K0;Q32KN8;Q3ZCJ7;F1MNF8	no	no	0	0	1	0	1	1	1	46.049	46.049	3	3.9693E-06	3	6133	20140904-PurClathDigest-1ug-02	106.93	104.95	72160000	34988000	18177000	18995000			27	44	24	72;73;74	80;81;82	81		178
AGATLEIK	Unmodified	801.45962	0.45961853	22	F1N1S2	yes	yes	0	0	0	0			1	37.508	37.508	2	0.045557	1	3778	20140904-PurClathDigest-1ug-03	57.59	12.196	0	0	0	0			28	22	25	75	83	83
AGDSHASEEPEQTEPEQR	Unmodified	1995.8406	0.84060541	29	G3MYP5	yes	yes	0	0	0	0	2	2	2	31.495	31.495	2;3	5.9571E-18	6	2436	20140904-PurClathDigest-1ug-03	212.95	207.56	63094000	31974000	16054000	15065000			29	29	26	76;77;78;79;80;81	84;85;86;87;88;89	89
AGDSHASEEPEQTEPEQREPTPYPDER	Unmodified	3080.3231	0.32314423	29	G3MYP5	yes	yes	0	0	0	1	2	2	2	35.244	35.244	3;4	0.00014017	7	3267	20140904-PurClathDigest-1ug-03	92.518	91.404	60987000	29537000	16995000	14456000			30	29	27	82;83;84;85;86;87	90;91;92;93;94;95;96	94
AGEPQDQAVEQK	Unmodified	1298.6103	0.61025853	29;24	F1N3M8;G3MYP5	no	no	0	0	0	0	1	1	1	31.864	31.864	2	3.3931E-06	5	2639	20140904-PurClathDigest-1ug-02	145.29	83.514	67393000	35727000	18134000	13532000			31	24;29	28	88;89;90	97;98;99;100;101	98
AGFAGDQIPK	Unmodified	1002.5134	0.51344502	27	F2Z4F0	no	no	0	0	0	0	1	1	1	39.084	39.084	2	0.0088404	3	4366	20140904-PurClathDigest-1ug-02	98.04	77.068	27602000	17040000	6043800	4519100			32	27	29	91;92;93	102;103;104	103
AGGVSGTHHPRPGHDPPPLPQPDPR	Unmodified	2575.2793	0.27925018	29;24	F1N3M8;G3MYP5	no	no	0	0	0	1	1	1		33.578	33.578	4	0.015863	2	3077	20140904-PurClathDigest-1ug-02	71.696	68.651	20160000	14412000	5747400	0			33	24;29	30	94;95	105;106	106
AGLLQR	Unmodified	656.39696	0.3969587	38	P49951;F1MPU0	yes	no	0	0	0	0	1	1	1	35.961	35.961	2	0.010454	14	3873	20140904-PurClathDigest-1ug-01	105.82	21.637	805940000	295390000	351240000	159300000			34	38	31	96;97;98	107;108;109;110;111;112;113;114;115;116;117;118;119;120	107
AGPELPSGDPAPAPEGPTAPR	Unmodified	1982.9698	0.96976909	11	E1BP30;F1MQZ0	yes	no	0	0	0	0	1	1		40.029	40.029	2	0.023355	2	4613	20140904-PurClathDigest-1ug-02	59.857	56.321	18418000	12370000	6048200	0			35	11	32	99;100	121;122	122
AGTFQAFEQFGQQLLAHGHYASPEIK	Unmodified	2874.4089	0.40892695	7	E1BFB0	yes	yes	0	0	0	0	1	1		53.13	53.13	4	1.8226E-12	2	8445	20140904-PurClathDigest-1ug-01	131.94	130.53	54335000	47984000	6350300	0			36	7	33	101;102	123;124	123
AHIAQLCEK	Unmodified	1011.5172	0.51715019	38	P49951;F1MPU0	yes	no	0	0	0	0		1		36.291	36.291	2	0.00028117	1	3698	20140904-PurClathDigest-1ug-02	166.07	146.08	15540000	0	15540000	0			37	38	34	103	125	125
AHMGMFTELAILYSK	2 Oxidation (M)	1742.8372	0.8371637	38	P49951;F1MPU0	yes	no	0	0	2	0	9	7	11	51.323	51.323	2;3	2.2276E-11	53	6112	20140904-PurClathDigest-1ug-03	139.66	136.28	3262500000	2196500000	625120000	440870000			38	38	35	104;105;106;107;108;109;110;111;112;113;114;115;116;117;118;119;120;121;122;123;124;125;126;127;128;129;130	126;127;128;129;130;131;132;133;134;135;136;137;138;139;140;141;142;143;144;145;146;147;148;149;150;151;152;153;154;155;156;157;158;159;160;161;162;163;164;165;166;167;168;169;170;171;172;173;174;175;176;177;178	172		140;141
AHMGMFTELAILYSK	Oxidation (M)	1726.8422	0.84224908	38	P49951;F1MPU0	yes	no	0	0	1	0	4	4	4	50.004	50.004	2;3	1.4181E-07	13	6902	20140904-PurClathDigest-1ug-02	151.22	148.31	132230000	63928000	34899000	33405000			39	38	35	131;132;133;134;135;136;137;138;139;140;141;142	179;180;181;182;183;184;185;186;187;188;189;190;191	185		140;141
AHTMTDDVTFWK	Oxidation (M)	1466.65	0.65001485	38	P49951;F1MPU0	yes	no	0	0	1	0	3	1	2	45.127	45.127	2;3	8.0824E-07	19	5426	20140904-PurClathDigest-1ug-01	196.15	188.62	3292700000	1788900000	720910000	782850000			40	38	36	143;144;145;146;147;148	192;193;194;195;196;197;198;199;200;201;202;203;204;205;206;207;208;209;210	192		142
AHTMTDDVTFWK	Unmodified	1450.6551	0.65510023	38	P49951;F1MPU0	yes	no	0	0	0	0	1	1	1	44.699	44.699	2	2.8159E-05	3	5553	20140904-PurClathDigest-1ug-03	136.27	131.49	79261000	44232000	19292000	15736000			41	38	36	149;150;151	211;212;213	213
AIGNIELGIR	Unmodified	1054.6135	0.61349341	22	F1N1S2	yes	yes	0	0	0	0	1	1	1	45.093	45.093	2	0.00011297	3	5630	20140904-PurClathDigest-1ug-03	159.79	94.637	19897000	10476000	4992500	4429100			42	22	37	152;153;154	214;215;216	216
AIIDGVER	Unmodified	871.47633	0.47633123	14	F1MGK5	yes	yes	0	0	0	0	1			37.585	37.585	2	0.0010929	1	4410	20140904-PurClathDigest-1ug-01	128.61	18.298	18256000	18256000	0	0			43	14	38	155	217	217
AIKELDEWYAR	Unmodified	1392.7038	0.70376498	33	P04973	yes	yes	0	0	0	1	2	2	1	43.643	43.643	2;3	2.1142E-06	5	5294	20140904-PurClathDigest-1ug-03	157.68	147.66	97341000	78076000	12133000	7131500			44	33	39	156;157;158;159;160	218;219;220;221;222	222
AIQFYLEFK	Unmodified	1157.6121	0.61209643	38	P49951;F1MPU0	yes	no	0	0	0	0	1			50.723	50.723	2	0.0091866	1	7900	20140904-PurClathDigest-1ug-01	93.178	87.637	7811200	7811200	0	0			45	38	40	161	223	223
AKVDFILLK	Unmodified	1045.6536	0.65356732	9	E1BKN2	yes	yes	0	0	0	1	1	1	1	45.316	45.316	2	0.0057142	3	6334	20140904-PurClathDigest-1ug-01	113.93	63.092	30466000	15884000	8531600	6050700			46	9	41	162;163;164	224;225;226	224
ALAAELNQLR	Unmodified	1097.6193	0.61930707	43	Q28115	yes	yes	0	0	0	0	1	1	1	43.585	43.585	2	4.8383E-05	3	5906	20140904-PurClathDigest-1ug-01	175.91	90.237	270940000	157030000	66985000	46924000			47	43	42	165;166;167	227;228;229	227
ALALAPGPPAR	Unmodified	1032.608	0.60801411	29	G3MYP5	yes	yes	0	0	0	0	1	1	1	39.697	39.697	2	0.0033672	3	4880	20140904-PurClathDigest-1ug-01	111.61	104.94	30073000	15561000	8536200	5975200			48	29	43	168;169;170	230;231;232	230
ALEAELAALR	Unmodified	1055.5975	0.597509	40	Q08DH7	yes	yes	0	0	0	0		1	1	46.519	46.519	2	2.2241E-05	2	6195	20140904-PurClathDigest-1ug-02	179.09	106.16	132710000	0	65798000	66907000			49	40	44	171;172	233;234	233
ALEESNYELEGK	Unmodified	1380.6409	0.64088996	2	CON__P13645;CON__P02535-1	yes	no	0	0	0	0	1	1	1	39.144	39.144	2	0.00012533	3	4168	20140904-PurClathDigest-1ug-03	127.17	121.09	133030000	52718000	38976000	41335000		+	50	2	45	173;174;175	235;236;237	237
ALEGEEEEETANVQMSEK	Oxidation (M)	2037.8685	0.86845964	29;24	F1N3M8;G3MYP5	no	no	0	0	1	0	1			37.178	37.178	2	0.049635	1	4288	20140904-PurClathDigest-1ug-01	72.359	66.396	108760000	108760000	0	0			51	24;29	46	176	238	238		102
ALEHFTDLYDIK	Unmodified	1463.7296	0.72964538	38	P49951;F1MPU0	yes	no	0	0	0	0	2	2	2	45.769	45.769	2;3	1.21E-06	14	6030	20140904-PurClathDigest-1ug-02	163.51	129.51	3144800000	1598100000	803190000	743490000			52	38	47	177;178;179;180;181;182	239;240;241;242;243;244;245;246;247;248;249;250;251;252	245
ALEHFTDLYDIKR	Unmodified	1619.8308	0.83075641	38	P49951;F1MPU0	yes	no	0	0	0	1	3	3	3	43.267	43.267	2;3;4	1.2554E-25	21	5148	20140904-PurClathDigest-1ug-03	301.93	262.19	4316200000	2202000000	1260500000	853580000			53	38	48	183;184;185;186;187;188;189;190;191	253;254;255;256;257;258;259;260;261;262;263;264;265;266;267;268;269;270;271;272;273	272
ALEQEDKVPEGK	Unmodified	1341.6776	0.67760981	29	G3MYP5	yes	yes	0	0	0	1	2	2	2	33.141	33.141	2;3	7.8289E-05	6	2957	20140904-PurClathDigest-1ug-02	140.82	93.944	34704000	22490000	6992900	5221000			54	29	49	192;193;194;195;196;197	274;275;276;277;278;279	277
ALEQEDKVPEGKDK	Unmodified	1584.7995	0.79951586	29	G3MYP5	yes	yes	0	0	0	2	2	2	2	31.823	31.823	2;3	5.2681E-07	6	2517	20140904-PurClathDigest-1ug-03	181.26	169.89	45507000	23003000	12784000	9719900			55	29	50	198;199;200;201;202;203	280;281;282;283;284;285	285
ALEQKDEASEQDKAPEEK	Unmodified	2043.9597	0.95965791	29;24	F1N3M8;G3MYP5	no	no	0	0	0	2	1	2	2	31.307	31.307	3;4	7.9595E-14	5	2389	20140904-PurClathDigest-1ug-03	212.41	180.04	49981000	24475000	14605000	10901000			56	24;29	51	204;205;206;207;208	286;287;288;289;290	289
ALGSDLDSSLASLVGNLGISGTTSK	Unmodified	2362.2227	0.22274889	15	F1MGT4	yes	yes	0	0	0	0	1	1	1	56.917	56.917	2	4.9638E-19	3	9352	20140904-PurClathDigest-1ug-01	192.1	184.41	22942000	13252000	7082100	2608000			57	15	52	209;210;211	291;292;293	291
ALSSEGKPYVTKEELYQNLTR	Unmodified	2425.2489	0.24890406	7	E1BFB0	yes	yes	0	0	0	2	1		1	42.116	42.116	3	5.0071E-09	2	5565	20140904-PurClathDigest-1ug-01	148.75	144.44	14504000	10977000	0	3526400			58	7	53	212;213	294;295	294
ALTNQQEASVER	Unmodified	1344.6634	0.66335673	16	F1MIC9	yes	yes	0	0	0	0	1	1	1	33.959	33.959	2	1.7315E-07	3	3445	20140904-PurClathDigest-1ug-01	191.79	163.82	19090000	9269500	5022600	4797800			59	16	54	214;215;216	296;297;298	296
ALTVPELTQQMFDSK	Oxidation (M)	1722.8498	0.84983687	8	E1BJB1;Q6B856	yes	no	0	0	1	0	1	1	1	45.98	45.98	2	0.0022568	3	5853	20140904-PurClathDigest-1ug-03	109.07	104.92	73680000	46267000	12144000	15268000			60	8	55	217;218;219	299;300;301	301		43
ALVTTHHLMVHGNER	Oxidation (M)	1729.8682	0.86822133	15	F1MGT4	yes	yes	0	0	1	0	1	1	1	32.643	32.643	4	0.00057824	3	2707	20140904-PurClathDigest-1ug-03	81.632	58.641	52848000	33051000	11256000	8541800			61	15	56	220;221;222	302;303;304	304		65
ALYEQEIR	Unmodified	1020.524	0.52400971	32	P02548	yes	yes	0	0	0	0	1	1	1	39.032	39.032	2	0.00040482	3	4712	20140904-PurClathDigest-1ug-01	173.68	100.43	889610000	258590000	566070000	64958000			62	32	57	223;224;225	305;306;307	305
AMLSANIR	Oxidation (M)	890.46439	0.46438634	38	P49951;F1MPU0	yes	no	0	0	1	0	1	2	1	35.493	35.493	2	0.018548	13	3352	20140904-PurClathDigest-1ug-03	113.5	79.761	1121600000	560820000	332000000	228820000			63	38	58	226;227;228;229	308;309;310;311;312;313;314;315;316;317;318;319;320	316		143
AMLSANIR	Unmodified	874.46947	0.46947171	38	P49951;F1MPU0	yes	no	0	0	0	0		1	1	39.236	39.236	2	0.0010958	2	4349	20140904-PurClathDigest-1ug-02	127.84	75.128	28173000	0	14368000	13805000			64	38	58	230;231	321;322	321
ANEQLTDELAQK	Unmodified	1358.6678	0.66777341	28	F6RAG5	yes	yes	0	0	0	0	1			39.376	39.376	2	3.4874E-06	1	4894	20140904-PurClathDigest-1ug-01	132.56	115.35	4827500	4827500	0	0			65	28	59	232	323	323
APHWTSAQLTEASAQPHPPEIK	Unmodified	2395.1921	0.19205789	13	F1MEW3	yes	yes	0	0	0	0	2	3	2	40.605	40.605	2;3;4	2.6973E-09	9	4492	20140904-PurClathDigest-1ug-03	129.98	128.95	494440000	247970000	150410000	96056000			66	13	60	233;234;235;236;237;238;239	324;325;326;327;328;329;330;331;332	332
APILSDSSCK	Unmodified	1019.4957	0.49574604	31	P00760	yes	yes	0	0	0	0			1	38.167	38.167	2	0.00039559	1	3916	20140904-PurClathDigest-1ug-03	123.75	103.76	2131000	0	0	2131000			67	31	61	240	333	333
APPTLFGHTLGASLEDTKPK	Unmodified	2079.1001	0.10005498	13	F1MEW3	yes	yes	0	0	0	1	1	1	1	44.589	44.589	3	6.6125E-06	3	5508	20140904-PurClathDigest-1ug-03	120.79	119.3	40593000	24103000	8498000	7991800			68	13	62	241;242;243	334;335;336	336
AQALLER	Unmodified	799.4552	0.45520186	40	Q08DH7	yes	yes	0	0	0	0	1	1	1	35.818	35.818	2	0.0027282	4	3403	20140904-PurClathDigest-1ug-03	158.03	19.954	92971000	42955000	29744000	20272000			69	40	63	244;245;246	337;338;339;340	340
AQALLERDGLAEEVQR	Unmodified	1796.9381	0.93807503	40	Q08DH7	yes	yes	0	0	0	1	1		1	40.947	40.947	2	1.1102E-08	2	5251	20140904-PurClathDigest-1ug-01	164.01	150.37	20388000	10678000	0	9710000			70	40	64	247;248	341;342	341
AQILPIR	Acetyl (Protein N-term)	851.52289	0.52288749	38	P49951	yes	yes	1	0	0	0	2	2	1	48.649	48.649	1;2	0.0044377	7	7304	20140904-PurClathDigest-1ug-01	100.07	62.508	1529500000	987150000	448310000	94015000			71	38	65	249;250;251;252;253	343;344;345;346;347;348;349	344
AQLADSFHLQQFFR	Unmodified	1706.8529	0.85288884	7	E1BFB0	yes	yes	0	0	0	0	1			50.336	50.336	3	2.4376E-05	1	7780	20140904-PurClathDigest-1ug-01	119.39	109.14	6162800	6162800	0	0			72	7	66	254	350	350
AQLEEASSAR	Unmodified	1060.5149	0.51490158	40	Q08DH7	yes	yes	0	0	0	0	1	1	1	32.591	32.591	2	0.00011753	3	3096	20140904-PurClathDigest-1ug-01	152.54	119.11	238900000	131460000	61609000	45834000			73	40	67	255;256;257	351;352;353	351
AQLEGHTVQSTLQSEEWFR	Unmodified	2245.0764	0.076359426	19	F1MSQ6	yes	yes	0	0	0	0	2	2	2	46.572	46.572	2;3	2.7664E-27	7	6694	20140904-PurClathDigest-1ug-01	241.13	232.08	265890000	146620000	64926000	54338000			74	19	68	258;259;260;261;262;263	354;355;356;357;358;359;360	354
AQLQDLNDR	Deamidation (NQ)	1072.5149	0.51490158	32	P02548	yes	yes	0	1	0	0	1	1		36.548	36.548	2	0.0024853	2	4130	20140904-PurClathDigest-1ug-01	159.28	110.85	20211000	13624000	6586800	0			75	32	69	264;265	361;362	361	17
AQLQDLNDR	Unmodified	1071.5309	0.530886	32	P02548	yes	yes	0	0	0	0			1	36.34	36.34	2	0.00049284	1	3493	20140904-PurClathDigest-1ug-03	128.86	19.194	54964000	0	0	54964000			76	32	69	266	363	363
AQTLPTSVVTITSESSPGKR	Unmodified	2058.0957	0.095697884	20	F1MYC9	yes	yes	0	0	0	1	1		1	42.053	42.053	3	0.021786	2	5554	20140904-PurClathDigest-1ug-01	57.366	56.88	20782000	14601000	0	6181900			77	20	70	267;268	364;365	364
AQVQLDSDHLEEDIHR	Unmodified	1903.9024	0.90241781	12	F1MDZ2;O77788	yes	no	0	0	0	0	3	3	3	40.048	40.048	2;3;4	2.0556E-17	12	4376	20140904-PurClathDigest-1ug-03	223.76	216.21	1214300000	676800000	277120000	260340000			78	12	71	269;270;271;272;273;274;275;276;277	366;367;368;369;370;371;372;373;374;375;376;377	377
AQWGENLQVTLIPTHDTEVTR	Unmodified	2407.2132	0.21318726	29;24	F1N3M8;G3MYP5	no	no	0	0	0	0			1	47.248	47.248	3	0.048208	1	6116	20140904-PurClathDigest-1ug-03	34.65	34.359	13378000	0	0	13378000			79	24;29	72	278	378	378
AQWGSNMQVTLIPTHDSEVMR	2 Oxidation (M)	2431.126	0.12602851	22	F1N1S2	yes	yes	0	0	2	0	1		1	42.875	42.875	3	0.030655	2	5068	20140904-PurClathDigest-1ug-03	49.188	47.961	80691000	57015000	0	23676000			80	22	73	279;280	379;380	380		89;90
AQYEEIAQR	Unmodified	1106.5356	0.53563702	4	CON__P35908;E1B991;G3MZ71	no	no	0	0	0	0	1		1	35.963	35.963	2	0.01313	2	4008	20140904-PurClathDigest-1ug-01	100.09	6.9248	20803000	14384000	0	6419500		+	81	4	74	281;282	381;382	381
AQYESLAAK	Unmodified	979.49746	0.4974606	40	Q08DH7	yes	yes	0	0	0	0			1	35.286	35.286	2	0.0070925	1	3264	20140904-PurClathDigest-1ug-03	103.55	90.509	22039000	0	0	22039000			82	40	75	283	383	383
ARESYVETELIFALAK	Unmodified	1838.9778	0.97781458	38	P49951;F1MPU0	yes	no	0	0	0	1	2	2	2	51.713	51.713	2;3	2.0717E-05	6	8097	20140904-PurClathDigest-1ug-01	136.34	117.41	108950000	57266000	28837000	22846000			83	38	76	284;285;286;287;288;289	384;385;386;387;388;389	385
ARFEELNADLFR	Unmodified	1479.747	0.74702678	36	P19120	no	no	0	0	0	1	2	2	1	45.985	45.985	2;3	7.6817E-44	5	5900	20140904-PurClathDigest-1ug-03	270.45	254.9	34242000	28193000	6048600	0			84	36	77	290;291;292;293;294	390;391;392;393;394	394
ARHDEYLEVTK	Unmodified	1359.6783	0.67827852	29	G3MYP5	yes	yes	0	0	0	1	1	1	1	34.533	34.533	3	2.3305E-05	3	3132	20140904-PurClathDigest-1ug-03	155.47	94.129	28794000	18104000	5687600	5002400			85	29	78	295;296;297	395;396;397	397
ARVDHGAEIITQSPGR	Unmodified	1705.886	0.88597988	13	F1MEW3	yes	yes	0	0	0	1	1			34.271	34.271	3	0.0020363	1	3589	20140904-PurClathDigest-1ug-01	94.922	89.281	19196000	19196000	0	0			86	13	79	298	398	398
ASAFALQEQPVVNAVIDDATK	Unmodified	2186.1219	0.12191263	34	P11179	yes	yes	0	0	0	0			1	52.473	52.473	2	0.0025703	1	7406	20140904-PurClathDigest-1ug-03	69.088	68.544	3015600	0	0	3015600			87	34	80	299	399	399
ASAFNSWFENAEEDLTDPVR	Unmodified	2297.0237	0.023655153	7	E1BFB0	yes	yes	0	0	0	0	1	1	1	56.602	56.602	2	1.5151E-08	3	9291	20140904-PurClathDigest-1ug-01	136.49	133.85	3118800	1612900	793160	712750			88	7	81	300;301;302	400;401;402	400
ASDKLDTVLEK	Unmodified	1217.6503	0.65033243	13	F1MEW3	yes	yes	0	0	0	1	1	2	1	38.226	38.226	2;3	4.1299E-09	5	3966	20140904-PurClathDigest-1ug-03	228.78	161.4	65938000	30816000	23787000	11334000			89	13	82	303;304;305;306	403;404;405;406;407	407
ASDKLDTVLEKSEEHADSK	Unmodified	2101.0175	0.017507143	13	F1MEW3	yes	yes	0	0	0	2	2	2	2	37.895	37.895	3;4	6.3483E-09	6	4069	20140904-PurClathDigest-1ug-02	174.2	163.96	59850000	34110000	15648000	10092000			90	13	83	307;308;309;310;311;312	408;409;410;411;412;413	411
ASGPIDHYR	Unmodified	1014.4883	0.4882929	9	E1BKN2	yes	yes	0	0	0	0	2	1	2	33.409	33.409	2;3	0.00019221	5	3024	20140904-PurClathDigest-1ug-02	128.36	105.72	30399000	22373000	2842800	5182500			91	9	84	313;314;315;316;317	414;415;416;417;418	416
ASISPMDEPVPDSESPIEK	Oxidation (M)	2042.9354	0.935417	22	F1N1S2	yes	yes	0	0	1	0		1	1	40.345	40.345	2	0.0027177	2	4640	20140904-PurClathDigest-1ug-02	91.589	71.921	21093000	0	12462000	8630300			92	22	85	318;319	419;420	419		91
ASLAALPPLHVAK	Unmodified	1286.7711	0.77105669	16	F1MIC9	yes	yes	0	0	0	0		1	1	42.622	42.622	2	0.015914	2	5207	20140904-PurClathDigest-1ug-02	75.739	74.795	6815100	0	3494300	3320800			93	16	86	320;321	421;422	421
ASMLFDTMPHHLALNR	2 Oxidation (M)	1884.8975	0.89747254	22	F1N1S2	yes	yes	0	0	2	0	1	1	1	40.089	40.089	3	0.0023408	3	4395	20140904-PurClathDigest-1ug-03	86.497	82.276	64879000	36783000	17587000	10510000			94	22	87	322;323;324	423;424;425	425		92;93
ASREEIHEYR	Unmodified	1288.616	0.61601261	40	Q08DH7	yes	yes	0	0	0	1	2	2	2	31.512	31.512	2;3	8.016E-08	6	2574	20140904-PurClathDigest-1ug-02	226.93	180.52	154070000	87343000	42605000	24120000			95	40	88	325;326;327;328;329;330	426;427;428;429;430;431	428
ASREEIHEYRR	Unmodified	1444.7171	0.71712364	40	Q08DH7	yes	yes	0	0	0	2	2	2	2	30.81	30.81	3;4	0.0010452	6	2282	20140904-PurClathDigest-1ug-03	134.18	117.96	93583000	46231000	29038000	18314000			96	40	89	331;332;333;334;335;336	432;433;434;435;436;437	437
ASYYVVSGNDPANGEPSR	Unmodified	1881.8493	0.8493196	29;24	F1N3M8;G3MYP5	no	no	0	0	0	0	1		1	39.303	39.303	2	0.0036268	2	4819	20140904-PurClathDigest-1ug-01	62.94	62.251	0	0	0	0			97	24;29	90	337;338	438;439	438
ATAGDTHLGGEDFDNR	Unmodified	1674.7234	0.72339081	42	Q27975;Q27965;P0CB32	no	no	0	0	0	0	2	2	2	37.051	37.051	2;3	4.5312E-17	6	3876	20140904-PurClathDigest-1ug-02	224.59	198.63	48203000	23277000	16827000	8099100			98	42	91	339;340;341;342;343;344	440;441;442;443;444;445	442
ATLEMVNHEK	Oxidation (M)	1186.5652	0.56522259	12	F1MDZ2;O77788	yes	no	0	0	1	0	2	2	2	31.823	31.823	2;3	0.0003581	9	2630	20140904-PurClathDigest-1ug-02	157.14	146.55	206240000	115850000	54354000	36034000			99	12	92	345;346;347;348;349;350	446;447;448;449;450;451;452;453;454	449		50
ATNSSWVVVFK	Unmodified	1236.6503	0.65027285	15	F1MGT4	yes	yes	0	0	0	0		1	1	48.631	48.631	2	0.0066339	2	6727	20140904-PurClathDigest-1ug-02	96.113	78.294	8139700	0	5164500	2975200			100	15	93	351;352	455;456	455
ATVLQNQLDESQQER	Unmodified	1757.8544	0.85440498	21	Q2KJ21;F1N037	yes	no	0	0	0	0	1	1	1	40.119	40.119	2	2.9586E-29	3	5003	20140904-PurClathDigest-1ug-01	273.61	222.8	25141000	11658000	8609900	4873100			101	21	94	353;354;355	457;458;459	457
AVDDLNLHSYSNLPIWVSK	Unmodified	2170.1059	0.10586864	6	E1BDX8	yes	yes	0	0	0	0		1		49.948	49.948	3	0.058217	1	7056	20140904-PurClathDigest-1ug-02	29.172	26.371	4781500	0	4781500	0			102	6	95	356	460	460
AVDVFFPPEAQNDFPVAMQISEKHDVVFLITK	Unmodified	3630.8432	0.84324194	38	P49951;F1MPU0	yes	no	0	0	0	1		1		54.503	54.503	4	0.055343	2	8206	20140904-PurClathDigest-1ug-02	25.239	25.215	12423000	0	12423000	0			103	38	96	357	461;462	462
AVEQKEEAVLEK	Unmodified	1371.7246	0.72456001	29;24	F1N3M8;G3MYP5	no	no	0	0	0	1	1	1	1	34.456	34.456	3	0.00020055	3	3105	20140904-PurClathDigest-1ug-03	105.65	66.091	54241000	34063000	10555000	9623200			104	24;29	97	358;359;360	463;464;465	465
AVFPSIVGRPR	Unmodified	1197.6982	0.6982261	39	P63258;P60712;F1MRD0	no	no	0	0	0	1	1	2	2	41.638	41.638	2;3	3.5107E-05	5	4762	20140904-PurClathDigest-1ug-03	160.77	143.1	45281000	21259000	12168000	11854000			105	39	98	361;362;363;364;365	466;467;468;469;470	470
AVFVDLEPTVIDEVR	Unmodified	1700.8985	0.89850163	44	Q2HJ86;F2Z4C1;Q3ZCJ7;F1MNF8	no	no	0	0	0	0	1	1	1	51.416	51.416	2	3.6411E-06	3	7160	20140904-PurClathDigest-1ug-03	132.08	126.54	110650000	47297000	32482000	30869000			106	44	99	366;367;368	471;472;473	473
AVLDALLEGK	Unmodified	1027.5914	0.59136099	29;24;22	F1N3M8;G3MYP5;F1N1S2	no	no	0	0	0	0	1	1	1	48.926	48.926	2	0.0037114	3	6804	20140904-PurClathDigest-1ug-02	112.13	46.074	92355000	51946000	20609000	19800000			107	24;29;22	100	369;370;371	474;475;476	475
AVNYFSK	Unmodified	827.41775	0.41775372	38	P49951;F1MPU0	yes	no	0	0	0	0	2	2	2	37.785	37.785	2	0.0046302	15	4513	20140904-PurClathDigest-1ug-01	139.31	72.279	1442400000	734290000	421290000	286850000			108	38	101	372;373;374;375;376;377	477;478;479;480;481;482;483;484;485;486;487;488;489;490;491	478
AVNYFSK	Deamidation (NQ)	828.40177	0.4017693	38	P49951;F1MPU0	yes	no	0	1	0	0	1		1	39.29	39.29	2	0.0056306	2	4241	20140904-PurClathDigest-1ug-03	104.21	41.495	0	0	0	0			109	38	101	378;379	492;493	493	23
AYEFAER	Unmodified	884.40283	0.40283194	38	P49951;F1MPU0	yes	no	0	0	0	0	1	1	1	38.108	38.108	2	0.002582	13	4274	20140904-PurClathDigest-1ug-02	158.08	87.171	1478400000	777540000	412890000	288010000			110	38	102	380;381;382	494;495;496;497;498;499;500;501;502;503;504;505;506	501
DADETKEWIEEK	Unmodified	1491.6729	0.67291837	7	E1BFB0	yes	yes	0	0	0	1	1	1	1	40.204	40.204	2	8.4186E-10	3	5028	20140904-PurClathDigest-1ug-01	235.73	198.78	28844000	20287000	4533500	4023100			111	7	103	383;384;385	507;508;509	507
DAEAWFNEK	Unmodified	1108.4825	0.48253882	2	CON__P13645;P06394;A6QNZ7;Q148H6;CON__Q148H6;CON__Q7Z3Y7;Q0P5J4;CON__Q7Z3Z0;CON__Q7Z3Y8;Q0P5J6	yes	no	0	0	0	0	1	1	1	45.123	45.123	2	0.00050018	3	5627	20140904-PurClathDigest-1ug-03	109.44	90.482	29500000	13140000	8858500	7502000		+	112	2	104	386;387;388	510;511;512	512
DAGTIAGLNVLR	Unmodified	1198.667	0.66698555	36	P19120	yes	yes	0	0	0	0			1	47.113	47.113	2	0.029719	1	6096	20140904-PurClathDigest-1ug-03	70.195	56.795	6602000	0	0	6602000			113	36	105	389	513	513
DAGVIAGLNVLR	Unmodified	1196.6877	0.68772099	42	Q27975;Q27965;P0CB32	yes	no	0	0	0	0	1			49.065	49.065	2	0.0026008	1	7453	20140904-PurClathDigest-1ug-01	107.11	89.448	7568400	7568400	0	0			114	42	106	390	514	514
DALEIYKR	Unmodified	1006.5447	0.54474515	15	F1MGT4	yes	yes	0	0	0	1	1	1	1	38.56	38.56	2	0.0053353	3	4612	20140904-PurClathDigest-1ug-01	155.75	14.365	23738000	14351000	7444300	1942700			115	15	107	391;392;393	515;516;517	515
DAMQYASESK	Oxidation (M)	1144.4707	0.47065351	38	P49951;F1MPU0	yes	no	0	0	1	0	1	1	1	32.136	32.136	2	0.00068582	5	2979	20140904-PurClathDigest-1ug-01	140.78	133.5	1037400000	545340000	286010000	206010000			116	38	108	394;395;396	518;519;520;521;522	518		144
DAMQYASESK	Unmodified	1128.4757	0.47573888	38	P49951;F1MPU0	yes	no	0	0	0	0	1	1	1	35.784	35.784	2	0.00039897	3	3369	20140904-PurClathDigest-1ug-03	121.36	103.3	47304000	24244000	13836000	9223800			117	38	108	397;398;399	523;524;525	525
DAMQYASESKDTELAEELLQWFLQEEKR	Oxidation (M)	3402.5926	0.59256614	38	P49951;F1MPU0	yes	no	0	0	1	2	2	2	2	58.149	58.149	3;4	7.1399E-08	11	9561	20140904-PurClathDigest-1ug-01	155.8	153.66	179190000	70818000	71136000	37238000			118	38	109	400;401;402;403;404;405	526;527;528;529;530;531;532;533;534;535;536	526		144
DEASEQDKAPEEKDK	Unmodified	1717.7643	0.76425257	29;24	F1N3M8;G3MYP5	no	no	0	0	0	2	1	1	1	30.428	30.428	3	2.0152E-08	3	2197	20140904-PurClathDigest-1ug-03	180.11	161.72	24502000	13552000	6614500	4336000			119	24;29	110	406;407;408	537;538;539	539
DFPLNDLLSATELDKIR	Unmodified	1959.0313	0.031306713	6	E1BDX8	yes	yes	0	0	0	1	1			55.392	55.392	3	0.0012079	1	9108	20140904-PurClathDigest-1ug-01	91.401	87.65	1954600	1954600	0	0			120	6	111	409	540	540
DGDKALPEEEPQPSAPAQEAGYSTLAQSHPSDLPEEPSSPQER	Unmodified	4571.0848	0.084818025	13	F1MEW3	yes	yes	0	0	0	1			1	42.158	42.158	4	0.062372	1	4843	20140904-PurClathDigest-1ug-03	28.261	28.022	12936000	0	0	12936000			121	13	112	410	541	541
DGEVIKESK	Unmodified	1003.5186	0.51858998	43	Q28115	yes	yes	0	0	0	1	1	1	1	31.236	31.236	2	0.00020621	3	2795	20140904-PurClathDigest-1ug-01	167.1	65.452	6381500	2855900	2598800	926840			122	43	113	411;412;413	542;543;544	542
DGLAEEVQR	Unmodified	1015.4934	0.49343786	40	Q08DH7	yes	yes	0	0	0	0	1	1	1	37.398	37.398	2	0.00028005	3	4312	20140904-PurClathDigest-1ug-01	166.07	81.323	163580000	92884000	40100000	30599000			123	40	114	414;415;416	545;546;547	545
DGQETAFASYDR	Unmodified	1358.5739	0.57387302	9	E1BKN2	yes	yes	0	0	0	0	1	1	1	40.413	40.413	2	1.9994E-06	3	4451	20140904-PurClathDigest-1ug-03	158.01	151.58	31352000	12787000	8515200	10049000			124	9	115	417;418;419	548;549;550	550
DHGESAHAVYDKFSVGDAR	Unmodified	2059.9348	0.93478057	18	F1MRZ5;F1MRZ6	yes	no	0	0	0	1		1	1	38.784	38.784	4	9.6638E-06	2	4254	20140904-PurClathDigest-1ug-02	119.8	113.03	4871400	0	2975000	1896400			125	18	116	420;421	551;552	551
DIEESSLVK	Unmodified	1018.5183	0.51825563	12	F1MDZ2;O77788	yes	no	0	0	0	0	1			39.196	39.196	2	0.055768	1	4824	20140904-PurClathDigest-1ug-01	70.028	17.625	42237000	42237000	0	0			126	12	117	422	553	553
DIEESSLVKVELDKK	Unmodified	1730.9302	0.93019569	12	F1MDZ2;O77788	yes	no	0	0	0	2	2	2	2	41.741	41.741	2;3	1.0366E-11	6	4770	20140904-PurClathDigest-1ug-03	224.06	165.18	143150000	66969000	35342000	40841000			127	12	118	423;424;425;426;427;428	554;555;556;557;558;559	559
DIENQYETQITQIEHEVSSSGQEVQSSAK	Unmodified	3263.5066	0.5065879	3	CON__P35527	yes	yes	0	0	0	0	1	1	1	51.586	51.586	3	3.2823E-27	3	7174	20140904-PurClathDigest-1ug-03	195.73	191.95	98750000	41862000	32280000	24608000		+	128	3	119	429;430;431	560;561;562	562
DIKPQLELIEDEEKLK	Unmodified	1939.0514	0.051373454	22	F1N1S2	yes	yes	0	0	0	2	1	1	1	45.513	45.513	3	0.00038661	3	5988	20140904-PurClathDigest-1ug-02	111.22	108.64	112550000	56836000	37006000	18704000			129	22	120	432;433;434	563;564;565	564
DIQGTEEEKAPPTLFGHTLGASLEDTKPK	Unmodified	3108.5615	0.56152401	13	F1MEW3	yes	yes	0	0	0	2	2	2	2	44.674	44.674	3;4	0.00025149	8	5521	20140904-PurClathDigest-1ug-03	110.9	110.35	847740000	492340000	202180000	153220000			130	13	121	435;436;437;438;439;440	566;567;568;569;570;571;572;573	573
DKAGEPQDQAVEQK	Unmodified	1541.7322	0.73216458	29;24	F1N3M8;G3MYP5	no	no	0	0	0	1	2	1	2	31.282	31.282	2;3	6.0836E-11	5	2516	20140904-PurClathDigest-1ug-02	196.97	184.24	14393000	8717900	2671000	3003800			131	24;29	122	441;442;443;444;445	574;575;576;577;578	576
DKALEQEDKVPEGK	Unmodified	1584.7995	0.79951586	29	G3MYP5	yes	yes	0	0	0	2	1	2	1	32.817	32.817	2;3	1.7665E-07	4	3170	20140904-PurClathDigest-1ug-01	193.47	183.63	35727000	10625000	15372000	9729900			132	29	123	446;447;448;449	579;580;581;582	579
DKFLEEK	Unmodified	907.4651	0.46509784	24	F1N3M8	yes	yes	0	0	0	1		1	1	34.773	34.773	2	0.0050122	2	3343	20140904-PurClathDigest-1ug-02	110.41	27.955	2668600	0	0	2668600			133	24	124	450;451	583;584	583
DKTQEQESPVQEDK	Unmodified	1659.7588	0.75877326	29;24	F1N3M8;G3MYP5	no	no	0	0	0	1		1	1	31.623	31.623	2	6.3267E-13	2	2468	20140904-PurClathDigest-1ug-03	197.47	176.5	4725100	0	2829800	1895200			134	24;29	125	452;453	585;586	586
DKTQEQESPVQEDKTMAPK	Oxidation (M)	2204.0267	0.026691621	29;24	F1N3M8;G3MYP5	no	no	0	0	1	2	1	1	1	32	32	3	0.006826	3	2964	20140904-PurClathDigest-1ug-01	99.313	96.358	45055000	23517000	13048000	8490400			135	24;29	126	454;455;456	587;588;589	587		103
DKVSDGVTK	Unmodified	947.49238	0.49237523	13	F1MEW3	yes	yes	0	0	0	1	1	1	1	30.598	30.598	2	0.00021013	3	2375	20140904-PurClathDigest-1ug-02	158.94	84.564	11703000	5965400	3055100	2682700			136	13	127	457;458;459	590;591;592	591
DLAALEDKVK	Unmodified	1100.6077	0.60773933	7	E1BFB0	yes	yes	0	0	0	1	1	1	1	41.556	41.556	2	0.0014062	3	5403	20140904-PurClathDigest-1ug-01	133.75	71.586	19887000	9629700	5512700	4744800			137	7	128	460;461;462	593;594;595	593
DLAALGDKVNSLGETAER	Unmodified	1857.9432	0.94321999	7	E1BFB0	yes	yes	0	0	0	1		1		44.84	44.84	2	5.0848E-13	1	5775	20140904-PurClathDigest-1ug-02	197.14	168.04	7986900	0	7986900	0			138	7	129	463	596	596
DLASVQALLR	Unmodified	1084.6241	0.6240581	7	E1BFB0	yes	yes	0	0	0	0	1	1	1	50.176	50.176	2	9.7143E-05	3	7683	20140904-PurClathDigest-1ug-01	163.16	105.57	13184000	7017800	3056400	3109500			139	7	130	464;465;466	597;598;599	597
DLATDLSLIEVK	Unmodified	1315.7235	0.72349737	13	F1MEW3	yes	yes	0	0	0	0		1	1	53.517	53.517	2	3.5952E-06	2	7619	20140904-PurClathDigest-1ug-03	142.83	82.575	30764000	0	16570000	14194000			140	13	131	467;468	600;601	601
DLATGAVPASLKPSK	Unmodified	1453.814	0.81404372	29;24	F1N3M8;G3MYP5	no	no	0	0	0	1	1	1	1	39.759	39.759	2	4.0216E-05	5	4510	20140904-PurClathDigest-1ug-02	126.77	120.49	147370000	79246000	38378000	29743000			141	24;29	132	469;470;471	602;603;604;605;606	604
DLEEWNQR	Unmodified	1088.4887	0.48868683	30	P04975;G3N252	yes	no	0	0	0	0	1	1	1	41.03	41.03	2	0.00063524	8	5358	20140904-PurClathDigest-1ug-01	162.5	146.96	952150000	386660000	322020000	243460000			142	30	133	472;473;474	607;608;609;610;611;612;613;614	609
DLEEWNQR	Deamidation (NQ)	1089.4727	0.47270242	30	P04975;G3N252	yes	no	0	1	0	0			1	42.185	42.185	2	0.030286	1	4877	20140904-PurClathDigest-1ug-03	119.29	95.261	1417700	0	0	1417700			143	30	133	475	615	615	11
DLMSWINGIR	Oxidation (M);Deamidation (NQ)	1220.586	0.58595803	7	E1BFB0	yes	yes	0	1	1	0		1		49.246	49.246	2	9.3857E-05	1	6888	20140904-PurClathDigest-1ug-02	143.03	90.455	1945200	0	1945200	0			144	7	134	476	616	616	3	29
DLSSSEKQEHVK	Unmodified	1385.6787	0.67867245	16	F1MIC9	yes	yes	0	0	0	1	1	1	1	31.115	31.115	3	0.0037803	3	2362	20140904-PurClathDigest-1ug-03	99.5	74.026	7402400	4316700	1716700	1368900			145	16	135	477;478;479	617;618;619	619
DLTGQVATPAVK	Unmodified	1198.6558	0.65575216	22	F1N1S2	yes	yes	0	0	0	0	1	1	1	38.811	38.811	2	0.0002246	3	4081	20140904-PurClathDigest-1ug-03	120.53	94.615	43424000	26564000	8815200	8044400			146	22	136	480;481;482	620;621;622	622
DLTGVQNLR	Unmodified	1014.5458	0.54580778	7	E1BFB0	yes	yes	0	0	0	0		1	1	40.467	40.467	2	0.00047662	2	4677	20140904-PurClathDigest-1ug-02	147.19	88.37	10075000	0	6116700	3958200			147	7	137	483;484	623;624	623
DLVAIEAK	Unmodified	857.48583	0.48583328	20	F1MYC9	yes	yes	0	0	0	0			1	40.56	40.56	1	0.015408	1	4465	20140904-PurClathDigest-1ug-03	69.598	44.704	677460	0	0	677460			148	20	138	485	625	625
DNLAQDLGTLR	Unmodified	1214.6255	0.62551466	43	Q28115	yes	yes	0	0	0	0		1	1	46.99	46.99	2	1.1789E-08	2	6344	20140904-PurClathDigest-1ug-02	202.03	171.31	25926000	0	14660000	11265000			149	43	139	486;487	626;627	626
DNNLLGK	Unmodified	772.40792	0.40791731	36	P19120	no	no	0	0	0	0			1	36.735	36.735	2	0.049402	1	3614	20140904-PurClathDigest-1ug-03	79.809	45.707	1255400	0	0	1255400			150	36	140	488	628	628
DNNLLGR	Unmodified	800.41407	0.41406533	42	Q27975;Q27965;P0CB32	no	no	0	0	0	0			1	37.988	37.988	2	0.0069233	1	3882	20140904-PurClathDigest-1ug-03	120.45	100.1	914630	0	0	914630			151	42	141	489	629	629
DPELWGSVLLESNPYR	Unmodified	1873.921	0.92102798	38	P49951	yes	yes	0	0	0	0			1	55.155	55.155	2	6.997E-05	1	7947	20140904-PurClathDigest-1ug-03	99.344	92.811	20526000	0	0	20526000			152	38	142	490	630	630
DPHLACVAYER	Unmodified	1272.5921	0.59210605	38	P49951;F1MPU0	yes	no	0	0	0	0	1			41.391	41.391	2	0.024478	1	5409	20140904-PurClathDigest-1ug-01	77.062	57.404	19632000	19632000	0	0			153	38	143	491	631	631
DQAPEGKDEDLEPK	Unmodified	1569.7158	0.71584581	24	F1N3M8	yes	yes	0	0	0	1	1	1	2	33.809	33.809	2;3	0.0010154	5	3119	20140904-PurClathDigest-1ug-02	110.84	99.339	37056000	22342000	7871600	6842200			154	24	144	492;493;494;495	632;633;634;635;636	634
DQAPERKDEDLEPK	Unmodified	1668.7955	0.79549312	29;24	F1N3M8;G3MYP5	no	no	0	0	0	2	2	1	1	32.323	32.323	2;3	0.00061394	4	2621	20140904-PurClathDigest-1ug-03	120.21	110.64	32668000	21279000	6336100	5052200			155	24;29	145	496;497;498;499	637;638;639;640	640
DQASEGKDEDLEPK	Unmodified	1559.6951	0.69511037	29	G3MYP5	yes	yes	0	0	0	1	2	2	2	33.315	33.315	2;3	1.4103E-12	8	2968	20140904-PurClathDigest-1ug-02	199.03	189.9	162050000	99008000	35008000	28033000			156	29	146	500;501;502;503;504;505	641;642;643;644;645;646;647;648	644
DQASEGKDEDLEPKDR	Unmodified	1830.8232	0.82316443	29	G3MYP5	yes	yes	0	0	0	2		1		32.362	32.362	3	0.038102	1	2776	20140904-PurClathDigest-1ug-02	81.713	77.814	4101000	0	4101000	0			157	29	147	506	649	649
DQGGAGEGLVR	Unmodified	1057.5152	0.51523593	13	F1MEW3	yes	yes	0	0	0	0	1	1	1	35.781	35.781	2	5.1675E-06	3	3386	20140904-PurClathDigest-1ug-03	153.88	109.17	48275000	20005000	14662000	13607000			158	13	148	507;508;509	650;651;652	652
DQLQTFSEEHPVLLTEAPLNPR	Unmodified	2533.2813	0.28126682	27	F2Z4F0	yes	yes	0	0	0	0			1	48.85	48.85	3	0.048122	1	6513	20140904-PurClathDigest-1ug-03	29.842	29.083	4506100	0	0	4506100			159	27	149	510	653	653
DRGPDSGAETEEEKDTWEEK	Unmodified	2306.9775	0.97749282	29;24	F1N3M8;G3MYP5	no	no	0	0	0	2	2	3	3	36.216	36.216	2;3;4	5.9907E-23	8	3687	20140904-PurClathDigest-1ug-02	254.39	253.17	135340000	56851000	46480000	32012000			160	24;29	150	511;512;513;514;515;516;517;518	654;655;656;657;658;659;660;661	656
DSLYKDAMQYASESK	Oxidation (M)	1750.772	0.77198048	38	P49951;F1MPU0	yes	no	0	0	1	1	1	1	1	42.591	42.591	2	1.1836E-05	3	4974	20140904-PurClathDigest-1ug-03	154.46	141.66	21129000	10319000	5218900	5590700			161	38	151	519;520;521	662;663;664	664		144
DSSKVEEPQKDQPDK	Unmodified	1728.8166	0.81662249	13	F1MEW3	yes	yes	0	0	0	2	2	2	2	30.598	30.598	2;3	2.3889E-30	6	2366	20140904-PurClathDigest-1ug-02	325.77	310.58	130660000	64752000	38124000	27787000			162	13	152	522;523;524;525;526;527	665;666;667;668;669;670	667
DSYVGDEAQSK	Unmodified	1197.515	0.51496116	39	P63258;P60712;F1MRD0	no	no	0	0	0	0	1	1		33.711	33.711	2	0.00022886	2	3403	20140904-PurClathDigest-1ug-01	126.19	115.03	15775000	11761000	4014500	0			163	39	153	528;529	671;672	671
DSYVGDEAQSKR	Unmodified	1353.6161	0.61607219	39	P63258;P60712;F1MRD0	no	no	0	0	0	1	1	1	1	32.625	32.625	2	3.4426E-08	3	3122	20140904-PurClathDigest-1ug-01	211.37	180.98	44178000	22985000	11798000	9395000			164	39	154	530;531;532	673;674;675	673
DTAPDQKDQAPEGKDEDLEPK	Unmodified	2325.0608	0.06082852	24	F1N3M8	yes	yes	0	0	0	2	3	2	2	33.737	33.737	2;3;4	1.6961E-06	7	3096	20140904-PurClathDigest-1ug-02	121.46	119.3	136990000	88807000	26438000	21744000			165	24	155	533;534;535;536;537;538;539	676;677;678;679;680;681;682	679
DTELAEELLQWFLQEEKR	Unmodified	2276.1325	0.13247732	38	P49951;F1MPU0	yes	no	0	0	0	1	1	1	1	58.146	58.146	3	8.4836E-09	7	8768	20140904-PurClathDigest-1ug-02	135.09	134.54	37465000	12273000	17512000	7679600			166	38	156	540;541;542	683;684;685;686;687;688;689	686
DTELAEELLQWFLQEEKR	Deamidation (NQ)	2277.1165	0.11649291	38	P49951;F1MPU0	yes	no	0	1	0	1		1		58.774	58.774	2	9.5487E-05	1	8877	20140904-PurClathDigest-1ug-02	117.18	114.61	0	0	0	0			167	38	156	543	690	690	62
DTVSPVLDEK	Unmodified	1101.5554	0.55536941	22	F1N1S2	yes	yes	0	0	0	0		1	1	38.796	38.796	2	0.0012927	2	4084	20140904-PurClathDigest-1ug-03	117.28	89.566	3558900	0	2104100	1454800			168	22	157	544;545	691;692	692
DVAEEIANYRPTIDSLHEQASALPQEHAESPDVQGR	Unmodified	3971.8886	0.88856524	20	F1MYC9	yes	yes	0	0	0	1	1	1	1	46.785	46.785	4	4.6846E-06	3	6314	20140904-PurClathDigest-1ug-02	106.3	106.19	51151000	20427000	18323000	12401000			169	20	158	546;547;548	693;694;695	694
DVDGATLAR	Unmodified	916.46141	0.46140945	40	Q08DH7	yes	yes	0	0	0	0	1	1	1	35.59	35.59	2	0.00048849	3	3354	20140904-PurClathDigest-1ug-03	137.14	82.524	143530000	65859000	39097000	38577000			170	40	159	549;550;551	696;697;698	698
DVLEDIPK	Unmodified	927.49131	0.49131259	13	F1MEW3	yes	yes	0	0	0	0	1			43.931	43.931	1	0.01744	1	6099	20140904-PurClathDigest-1ug-01	62.464	35.502	3063300	3063300	0	0			171	13	160	552	699	699
DVLEDIPKWEGK	Unmodified	1427.7296	0.72964538	13	F1MEW3	yes	yes	0	0	0	1	1	1		46.703	46.703	2	5.5595E-05	2	6782	20140904-PurClathDigest-1ug-01	147.72	143.22	18297000	12792000	5504500	0			172	13	161	553;554	700;701	700
DVNAAIATIK	Unmodified	1014.571	0.5709599	44	Q2HJ86;F2Z4C1;F6RP72;F2Z4K0;Q32KN8;Q3ZCJ7;F1MNF8	no	no	0	0	0	0	1	1	1	41.61	41.61	2	0.010023	3	4745	20140904-PurClathDigest-1ug-03	94.363	69.587	44378000	26524000	8128600	9725700			173	44	162	555;556;557	702;703;704	704
DVSSVELLMNNHQGIK	Oxidation (M)	1798.8883	0.88834765	20	F1MYC9	yes	yes	0	0	1	0	1	1		41.257	41.257	2	9.5118E-13	2	4895	20140904-PurClathDigest-1ug-02	204.35	196.43	12123000	8752900	3370100	0			174	20	163	558;559	705;706	706		74
DWFIQMPTEAK	Oxidation (M)	1380.6384	0.63838754	13	F1MEW3	yes	yes	0	0	1	0	1	1	1	46.793	46.793	2	0.0023391	3	6790	20140904-PurClathDigest-1ug-01	124.42	113.78	91954000	67329000	13442000	11183000			175	13	164	560;561;562	707;708;709	707		55
DYQELMNTK	Oxidation (M)	1156.507	0.50703901	1	CON__P04264	no	no	0	0	1	0	1	1	1	35.816	35.816	2	0.0052959	5	3924	20140904-PurClathDigest-1ug-01	126.31	78.222	12539000	6750400	2923100	2865200		+	176	1	165	563;564;565	710;711;712;713;714	710		0
DYQELMNVK	Oxidation (M)	1154.5278	0.52777445	4	CON__P35908	no	no	0	0	1	0		1		38.62	38.62	2	0.046606	1	4230	20140904-PurClathDigest-1ug-02	98.044	85.881	3436300	0	3436300	0		+	177	4	166	566	715	715		15
EAALTSEEVGADLEQVEVLQK	Unmodified	2257.1325	0.1325369	7	E1BFB0	yes	yes	0	0	0	0			1	50.169	50.169	2	0.048242	1	6845	20140904-PurClathDigest-1ug-03	61.862	61.207	7616600	0	0	7616600			178	7	167	567	716	716
EAASELLMR	Oxidation (M)	1034.5066	0.50664508	20	F1MYC9	yes	yes	0	0	1	0			1	39.577	39.577	2	0.057762	1	4246	20140904-PurClathDigest-1ug-03	98.009	89.051	2063200	0	0	2063200			179	20	168	568	717	717		75
EAASYQEALAR	Unmodified	1207.5833	0.5833155	43	Q28115	yes	yes	0	0	0	0	1	1	1	38.254	38.254	2	1.9729E-06	4	4138	20140904-PurClathDigest-1ug-02	170.02	135.25	218150000	115320000	58962000	43873000			180	43	169	569;570;571	718;719;720;721	719
EAEEEEKKDEGAGEEQATK	Unmodified	2105.9237	0.92366634	32	P02548	yes	yes	0	0	0	2	2	2	2	30.713	30.713	2;3	5.7279E-27	6	2670	20140904-PurClathDigest-1ug-01	277.98	271.07	174030000	91443000	47798000	34790000			181	32	170	572;573;574;575;576;577	722;723;724;725;726;727	723
EAEGLPDRTEAR	Unmodified	1342.6477	0.64770667	29;24	F1N3M8;G3MYP5	no	no	0	0	0	1	2	2	2	33.407	33.407	2;3	6.1216E-07	6	3291	20140904-PurClathDigest-1ug-01	180.47	134.31	70445000	44563000	14252000	11630000			182	24;29	171	578;579;580;581;582;583	728;729;730;731;732;733	728
EAEGLPDRTEAREESEPEVK	Unmodified	2270.0662	0.066248249	29;24	F1N3M8;G3MYP5	no	no	0	0	0	2	1	1	1	35.204	35.204	3	2.0223E-06	4	3766	20140904-PurClathDigest-1ug-01	142.23	132.76	16115000	8974400	3830200	3310100			183	24;29	172	584;585;586	734;735;736;737	734
EAFLNTEDKGDSLDSVEALIK	Unmodified	2293.1325	0.1325369	7	E1BFB0	yes	yes	0	0	0	1			1	50.133	50.133	3	0.02602	1	6830	20140904-PurClathDigest-1ug-03	62.617	58.622	11594000	0	0	11594000			184	7	173	587	738	738
EAIDSYIK	Unmodified	937.47566	0.47566253	38	P49951;F1MPU0	yes	no	0	0	0	0		1	1	40.73	40.73	2	0.020126	2	4695	20140904-PurClathDigest-1ug-02	91.318	46.237	634000000	0	329920000	304090000			185	38	174	588;589	739;740	739
EAINQGMDEELERDEK	Oxidation (M)	1920.8371	0.83709994	35	P11966	yes	yes	0	0	1	1		1		35.587	35.587	3	0.0019591	1	3527	20140904-PurClathDigest-1ug-02	101.42	79.535	5718700	0	5718700	0			186	35	175	590	741	741		125
EANELQQWINEK	Unmodified	1500.7209	0.72087161	7	E1BFB0	yes	yes	0	0	0	0		1	1	47.688	47.688	2	6.8983E-07	2	6526	20140904-PurClathDigest-1ug-02	165.58	157.92	5442800	0	2462900	2979900			187	7	176	591;592	742;743	742
EASPPISGDK	Unmodified	999.48729	0.48728985	13	F1MEW3	yes	yes	0	0	0	0	1	1	1	32.594	32.594	2	0.0045551	3	2688	20140904-PurClathDigest-1ug-03	110.39	43.695	63119000	37037000	15405000	10677000			188	13	177	593;594;595	744;745;746	746
EAYYSEEKDVR	Unmodified	1387.6256	0.62557424	22	F1N1S2	yes	yes	0	0	0	1		1		34.614	34.614	2	1.3253E-06	1	3301	20140904-PurClathDigest-1ug-02	180.97	159.42	6095000	0	6095000	0			189	22	178	596	747	747
EDAANNYAR	Unmodified	1022.4417	0.44173664	44	Q2HJ86;F2Z4C1;F6RP72;F2Z4K0;Q32KN8;Q3ZCJ7;F1MNF8;G5E6J5	no	no	0	0	0	0		1	1	32.042	32.042	2	0.00016926	2	2554	20140904-PurClathDigest-1ug-03	161.02	107.53	3935500	0	2358500	1576900			190	44	179	597;598	748;749	749
EEIAEYR	Unmodified	908.42396	0.42396131	12	F1MDZ2;O77788	yes	no	0	0	0	0		1	1	35.958	35.958	2	0.0049378	2	3628	20140904-PurClathDigest-1ug-02	134.66	59.353	5672300	0	3158600	2513700			191	12	180	599;600	750;751	750
EEIAEYRR	Unmodified	1064.5251	0.52507234	12	F1MDZ2;O77788	yes	no	0	0	0	1	1	1	1	33.546	33.546	2	0.004227	3	3060	20140904-PurClathDigest-1ug-02	167.23	65.687	23075000	13824000	4525300	4725900			192	12	181	601;602;603	752;753;754	753
EEIHEYR	Unmodified	974.44576	0.44575938	40	Q08DH7	yes	yes	0	0	0	0	1	1	1	32.302	32.302	2	1.4268E-06	3	3034	20140904-PurClathDigest-1ug-01	227.47	136.48	25437000	13390000	6707500	5339600			193	40	182	604;605;606	755;756;757	755
EEIHEYRR	Unmodified	1130.5469	0.54687041	40	Q08DH7	yes	yes	0	0	0	1	2	2	2	31.069	31.069	2;3	0.0016769	6	2474	20140904-PurClathDigest-1ug-02	111.95	68.177	75603000	38843000	21840000	14920000			194	40	183	607;608;609;610;611;612	758;759;760;761;762;763	760
EEQTERLEALDANSR	Unmodified	1759.8337	0.83366954	33	P04973	yes	yes	0	0	0	1	2	2	2	38.415	38.415	2;3	2.0054E-49	6	3993	20140904-PurClathDigest-1ug-03	324.6	282.28	151130000	86568000	36795000	27763000			195	33	184	613;614;615;616;617;618	764;765;766;767;768;769	768
EETPGTEWEK	Unmodified	1204.5248	0.52479757	30	P04975;G3N252	yes	no	0	0	0	0	1	1	1	38.055	38.055	2	0.00026566	4	4457	20140904-PurClathDigest-1ug-01	125.75	93.427	370020000	189400000	108250000	72377000			196	30	185	619;620;621	770;771;772;773	770
EGEVGVPDHSPR	Unmodified	1277.6	0.60002819	29	G3MYP5	yes	yes	0	0	0	0	1			33.367	33.367	2	2.1878E-06	1	3357	20140904-PurClathDigest-1ug-01	158.04	102.78	6730800	6730800	0	0			197	29	186	622	774	774
EGLEETLR	Unmodified	945.47673	0.47672516	32	P02548	yes	yes	0	0	0	0	1	1	1	39.358	39.358	2	0.000188	4	4768	20140904-PurClathDigest-1ug-01	190.52	83.223	177860000	78544000	66705000	32612000			198	32	187	623;624;625	775;776;777;778	775
EGMQLISEKPETEAVVK	Oxidation (M)	1902.9608	0.96084389	20	F1MYC9	yes	yes	0	0	1	1	1	1		38.453	38.453	2	0.0060025	2	4224	20140904-PurClathDigest-1ug-02	84.653	82.656	16768000	11615000	5153100	0			199	20	188	626;627	779;780	780		76
EGQFKDIITK	Unmodified	1177.6343	0.63428844	38	P49951;F1MPU0	yes	no	0	0	0	1	2	1	1	38.964	38.964	2;3	3.9283E-05	4	4340	20140904-PurClathDigest-1ug-02	184.55	94.725	393640000	324930000	38144000	30563000			200	38	189	628;629;630;631	781;782;783;784	783
EGSSEKEEGEQEEEGETEAEGEGEEAAAEAK	Unmodified	3253.3026	0.30258753	12	F1MDZ2;O77788	yes	no	0	0	0	1		1	1	39.199	39.199	3	0.0065321	2	4355	20140904-PurClathDigest-1ug-02	87.155	86.271	23205000	0	12159000	11045000			201	12	190	632;633	785;786	785
EGSSEKEEGEQEEEGETEAEGEGEEAAAEAKEEK	Unmodified	3639.4827	0.48273674	12	F1MDZ2;O77788	yes	no	0	0	0	2	1		1	39.547	39.547	4	0.0054674	2	4294	20140904-PurClathDigest-1ug-03	97.387	97.139	23606000	14626000	0	8980600			202	12	191	634;635	787;788	788
EHLELFWSR	Unmodified	1215.6037	0.60365701	38	P49951;F1MPU0	yes	no	0	0	0	0	2	2	2	47.023	47.023	2;3	2.1239E-07	19	6332	20140904-PurClathDigest-1ug-03	223.08	213.42	1781500000	842050000	516170000	423330000			203	38	192	636;637;638;639;640;641	789;790;791;792;793;794;795;796;797;798;799;800;801;802;803;804;805;806;807	805
EIEAEIQALR	Unmodified	1170.6245	0.62445203	12	F1MDZ2;O77788	yes	no	0	0	0	0	1	1	1	44.305	44.305	2	2.7848E-05	6	6089	20140904-PurClathDigest-1ug-01	172.98	68.933	241430000	128140000	65126000	48164000			204	12	193	642;643;644	808;809;810;811;812;813	808
EIETYHNLLEGGQEDFESSGAGK	Unmodified	2509.1245	0.12449141	3	CON__P35527	yes	yes	0	0	0	0	2	1	2	45.23	45.23	2;3	3.4356E-05	5	5668	20140904-PurClathDigest-1ug-03	90.308	89.415	98360000	54246000	13080000	31035000		+	205	3	194	645;646;647;648;649	814;815;816;817;818	818
EITALAPSTMK	Oxidation (M)	1176.606	0.60602477	39	P63258;P60712	no	no	0	0	1	0	1			37.607	37.607	2	0.059663	1	4414	20140904-PurClathDigest-1ug-01	89.805	61.228	41248000	41248000	0	0			206	39	195	650	819	819		163
EKDVLEDIPKWEGK	Unmodified	1684.8672	0.8672015	13	F1MEW3	yes	yes	0	0	0	2	1			43.888	43.888	3	0.014148	1	6083	20140904-PurClathDigest-1ug-01	82.651	80.429	14865000	14865000	0	0			207	13	196	651	820	820
EKEPETESKPGEDLK	Unmodified	1714.8261	0.82612454	13	F1MEW3	yes	yes	0	0	0	2	2	2	2	31.574	31.574	2;3	7.7805E-12	11	2575	20140904-PurClathDigest-1ug-02	231.21	219.84	298810000	160560000	88009000	50241000			208	13	197	652;653;654;655;656;657	821;822;823;824;825;826;827;828;829;830;831	827
EKEPIAASTNR	Unmodified	1214.6255	0.62551466	7	E1BFB0	yes	yes	0	0	0	1	1	1	1	31.312	31.312	2	0.00079059	3	2532	20140904-PurClathDigest-1ug-02	134.3	100.43	12674000	7937900	3067500	1668400			209	7	198	658;659;660	832;833;834	833
EKEPIVGSTDYGKDEDSAEALLK	Unmodified	2493.2122	0.21224378	7	E1BFB0	yes	yes	0	0	0	2	1	1	1	43.006	43.006	3	0.00063655	3	5781	20140904-PurClathDigest-1ug-01	104.67	100.47	33673000	15952000	9985500	7735200			210	7	199	661;662;663	835;836;837	835
EKGPEPTDEVLQQQGK	Unmodified	1781.8796	0.8795571	29;24	F1N3M8;G3MYP5	no	no	0	0	0	1	2	2	2	36.324	36.324	2;3	8.9473E-12	7	3516	20140904-PurClathDigest-1ug-03	205.98	175.24	195430000	101210000	54235000	39982000			211	24;29	200	664;665;666;667;668;669	838;839;840;841;842;843;844	843
EKGSGGEEEKGVVTNGLDVSPGDEK	Deamidation (NQ)	2517.1718	0.17183553	12	F1MDZ2;O77788	yes	no	0	1	0	2			1	38.11	38.11	3	0.00026617	2	3883	20140904-PurClathDigest-1ug-03	114.9	110.8	2965900	0	0	2965900			212	12	201	670	845;846	845	4
EKLDVLDQER	Unmodified	1243.6408	0.64083038	7	E1BFB0	yes	yes	0	0	0	1	1	1	1	38.884	38.884	2	4.5565E-06	3	4686	20140904-PurClathDigest-1ug-01	215.56	121.91	20604000	13798000	3939000	2867100			213	7	202	671;672;673	847;848;849	847
EKVEEVGGKEEGGLK	Unmodified	1586.8152	0.81516593	12	F1MDZ2;O77788	yes	no	0	0	0	2	2	2	2	32.618	32.618	2;3	6.4218E-10	6	2828	20140904-PurClathDigest-1ug-02	216.99	128.97	310780000	188280000	73031000	49462000			214	12	203	674;675;676;677;678;679	850;851;852;853;854;855	852
EKVGEQAQVVIIDMNDPSNPIR	Oxidation (M)	2467.2377	0.23768745	38	P49951;F1MPU0	yes	no	0	0	1	1	1	3	2	43.753	43.753	3	0.017962	9	4920	20140904-PurClathDigest-1ug-03	76.015	75.769	1452200000	598560000	542810000	310790000			215	38	204	680;681;682;683;684;685	856;857;858;859;860;861;862;863;864	862		145
EKVGEQAQVVIIDMNDPSNPIR	Unmodified	2451.2428	0.24277283	38	P49951;F1MPU0	yes	no	0	0	0	1		1		46.349	46.349	3	0.038765	1	6152	20140904-PurClathDigest-1ug-02	51.876	49.894	41845000	0	41845000	0			216	38	204	686	865	865
ELALSSPEDLTQDFEELKR	Unmodified	2219.0958	0.095757464	29;24	F1N3M8;G3MYP5	no	no	0	0	0	1		1	1	51.296	51.296	3	8.9239E-06	2	7124	20140904-PurClathDigest-1ug-03	106.57	101.07	8970500	0	4506900	4463600			217	24;29	205	687;688	866;867	867
ELDEWYAR	Unmodified	1080.4876	0.4876242	33	P04973	yes	yes	0	0	0	0	2	1	2	43.765	43.765	1;2	0.00043009	5	5933	20140904-PurClathDigest-1ug-01	117.93	76.432	1392300000	833680000	246900000	311690000			218	33	206	689;690;691;692;693	868;869;870;871;872	869
ELIDLVLDR	Unmodified	1084.6128	0.61282471	44	Q2HJ86	yes	yes	0	0	0	0	1	1	1	50.598	50.598	2	0.00026066	3	7216	20140904-PurClathDigest-1ug-02	166.07	89.387	30288000	15093000	8579100	6615900			219	44	207	694;695;696	873;874;875	874
ELIVDAEDTWIR	Unmodified	1458.7355	0.73545904	9	E1BKN2	yes	yes	0	0	0	0			1	50.393	50.393	2	0.02248	1	6907	20140904-PurClathDigest-1ug-03	70.089	42.991	7982700	0	0	7982700			220	9	208	697	876	876
ELQEQLAQQQVHVEMDVAKPDLTAALR	Oxidation (M)	3075.5659	0.56589788	43	Q28115	yes	yes	0	0	1	1	1	1	2	45.577	45.577	3;4	1.4451E-05	7	6403	20140904-PurClathDigest-1ug-01	134.03	132.47	378640000	121080000	86306000	171250000			221	43	209	698;699;700;701	877;878;879;880;881;882;883	877		172
ELSSEPR	Unmodified	816.39775	0.39774656	29;24	F1N3M8;G3MYP5	no	no	0	0	0	0	1	1		31.49	31.49	2	0.024151	2	2592	20140904-PurClathDigest-1ug-02	91.626	17.211	4850300	3367800	1482500	0			222	24;29	210	702;703	884;885	885
EMQFLMQK	2 Oxidation (M)	1085.4886	0.48855218	29;24	F1N3M8;G3MYP5	no	no	0	0	2	0	1	1	1	36.864	36.864	2	0.031924	3	4171	20140904-PurClathDigest-1ug-01	71.342	50.717	57218000	28580000	16730000	11908000			223	24;29	211	704;705;706	886;887;888	886		104;105
EMQYFMQQWTGTNK	2 Oxidation (M)	1822.7655	0.76545532	22	F1N1S2	yes	yes	0	0	2	0		1	1	42.218	42.218	2	0.0059272	2	4869	20140904-PurClathDigest-1ug-03	69.258	68.188	12280000	0	6896200	5384300			224	22	212	707;708	889;890	890		94;95
ENPYYDSR	Unmodified	1042.4356	0.43558863	38	P49951;F1MPU0	yes	no	0	0	0	0	1	1	1	35.163	35.163	2	0.0010213	7	3296	20140904-PurClathDigest-1ug-03	141.93	125.6	784590000	360980000	201770000	221840000			225	38	213	709;710;711	891;892;893;894;895;896;897	896
EPTPYPDER	Unmodified	1102.4931	0.49310351	29	G3MYP5	yes	yes	0	0	0	0		1		35.024	35.024	2	0.00048436	1	3391	20140904-PurClathDigest-1ug-02	136.99	100.54	2264700	0	2264700	0			226	29	214	712	898	898
EQDVVQEWR	Unmodified	1187.5571	0.55710075	29;24	F1N3M8;G3MYP5	no	no	0	0	0	0		1	1	41.438	41.438	2	0.00012236	2	4676	20140904-PurClathDigest-1ug-03	178.32	147.76	17706000	0	10802000	6903900			227	24;29	215	713;714	899;900	900
EQLMASDDFGR	Oxidation (M)	1283.5452	0.54521543	7	E1BFB0	yes	yes	0	0	1	0		1	1	38.845	38.845	2	0.06188	2	4093	20140904-PurClathDigest-1ug-03	86.463	80.207	3045700	0	1692200	1353500			228	7	216	715;716	901;902	902		30
EQLQGLNDR	Unmodified	1071.5309	0.530886	12;40	F1MDZ2;Q08DH7	no	no	0	0	0	0	1	1		36.288	36.288	2	0.0042314	2	3683	20140904-PurClathDigest-1ug-02	109.66	9.4182	240170000	160570000	79598000	0			229	12;40	217	717;718	903;904	904
EQLQVLNDR	Unmodified	1113.5778	0.57783619	19	F1MSQ6	yes	yes	0	0	0	0	1	1	1	39.843	39.843	2	0.00047622	3	4934	20140904-PurClathDigest-1ug-01	145.23	95.192	14771000	7256000	4401300	3113900			230	19	218	719;720;721	905;906;907	905
ERFEEEAR	Unmodified	1064.4887	0.48868683	12	F1MDZ2;O77788	yes	no	0	0	0	1	1	2	1	32.445	32.445	2;3	0.00010575	4	2795	20140904-PurClathDigest-1ug-02	204.86	119	54920000	21685000	26116000	7119100			231	12	219	722;723;724;725	908;909;910;911	910
ERLQEELSQAER	Unmodified	1486.7376	0.73758431	16	F1MIC9	yes	yes	0	0	0	1	1			38.505	38.505	2	2.4449E-35	1	4652	20140904-PurClathDigest-1ug-01	335.69	236.26	7470100	7470100	0	0			232	16	220	726	912	912
ERVEELTTDLEILKAEIEEK	Unmodified	2386.2479	0.24790101	16	F1MIC9	yes	yes	0	0	0	2	1	1	1	52.806	52.806	3	8.0867E-19	3	7749	20140904-PurClathDigest-1ug-02	222.6	220.17	25478000	15046000	5392000	5040100			233	16	221	727;728;729	913;914;915	914
ESEPPKLIDEETNIIQPSTEHTYSK	Unmodified	2884.3978	0.39781272	13	F1MEW3	yes	yes	0	0	0	1	1	1	1	42.371	42.371	3	5.5631E-06	3	5150	20140904-PurClathDigest-1ug-02	125.31	125.03	51780000	28468000	10944000	12368000			234	13	222	730;731;732	916;917;918	917
ESKEETPEVTK	Unmodified	1275.6194	0.61942623	22	F1N1S2	yes	yes	0	0	0	1	1			31.181	31.181	2	0.00024747	1	2788	20140904-PurClathDigest-1ug-01	136.93	108.7	1607700	1607700	0	0			235	22	223	733	919	919
ESKEETPGTEWEK	Unmodified	1548.6944	0.69438209	30	P04975;G3N252	yes	no	0	0	0	1	2	2	2	35.7	35.7	2;3	1.2506E-13	25	3338	20140904-PurClathDigest-1ug-03	249.3	205.89	2201200000	922730000	735750000	542770000			236	30	224	734;735;736;737;738;739	920;921;922;923;924;925;926;927;928;929;930;931;932;933;934;935;936;937;938;939;940;941;942;943;944	936
ESLKPAAKPLPSK	Unmodified	1364.8028	0.80275075	22	F1N1S2	yes	yes	0	0	0	2	2	2	1	32.08	32.08	2;3	0.00055717	5	2974	20140904-PurClathDigest-1ug-01	158.31	130.64	71702000	46737000	17054000	7911500			237	22	225	740;741;742;743;744	945;946;947;948;949	946
ESNCYDPERVK	Unmodified	1338.5874	0.5874146	38	P49951;F1MPU0	yes	no	0	0	0	1		1	1	36.3	36.3	2	1.9597E-06	2	3518	20140904-PurClathDigest-1ug-03	173.04	157.6	5352700	0	2741100	2611600			238	38	226	745;746	950;951	951
ESPEVLLTLDILK	Unmodified	1468.8389	0.83886148	6	E1BDX8	yes	yes	0	0	0	0	1			55.407	55.407	2	0.0044739	1	9077	20140904-PurClathDigest-1ug-01	83.243	79.381	2936300	2936300	0	0			239	6	227	747	952	952
ESSPLYSPSLSDSTSAVK	Unmodified	1853.8895	0.88945308	22	F1N1S2	yes	yes	0	0	0	0		1		42.433	42.433	2	0.023207	1	5165	20140904-PurClathDigest-1ug-02	56.819	48.505	15535000	0	15535000	0			240	22	228	748	953	953
ESTFLDEGPDDEQEVPPLEHTPQSPWASDFK	Unmodified	3526.5689	0.56885381	29	G3MYP5	yes	yes	0	0	0	0		1	1	49.95	49.95	3	0.026336	2	7005	20140904-PurClathDigest-1ug-02	49.967	49.934	96989000	0	45702000	51288000			241	29	229	749;750	954;955	954
ESVQEAFDTVSPMHK	Oxidation (M)	1719.7774	0.77740021	13	F1MEW3	yes	yes	0	0	1	0	1	1	1	42.217	42.217	2	4.9056E-05	4	5572	20140904-PurClathDigest-1ug-01	140.27	135.93	72173000	50992000	12040000	9141700			242	13	230	751;752;753	956;957;958;959	956		56
ESYVETELIFALAK	Unmodified	1611.8396	0.83958976	38	P49951;F1MPU0	yes	no	0	0	0	0	3	3	2	58.305	58.305	2	4.4924E-10	35	7941	20140904-PurClathDigest-1ug-03	167.73	131.62	1347100000	751180000	310450000	285470000			243	38	231	754;755;756;757;758;759;760;761	960;961;962;963;964;965;966;967;968;969;970;971;972;973;974;975;976;977;978;979;980;981;982;983;984;985;986;987;988;989;990;991;992;993;994	987
ETAPDQKDQAPER	Unmodified	1483.6903	0.69029976	29;24	F1N3M8;G3MYP5	no	no	0	0	0	1		1	1	30.628	30.628	3	0.0012319	2	2252	20140904-PurClathDigest-1ug-03	96.745	89.841	8946000	0	4360600	4585400			244	24;29	232	762;763	995;996	996
ETPTLSEQESTLAEKEPHLK	Unmodified	2266.1329	0.13287125	13	F1MEW3	yes	yes	0	0	0	1	2	2	2	40.679	40.679	2;3	1.0722E-08	9	4531	20140904-PurClathDigest-1ug-03	144.33	142.81	341550000	161050000	105760000	74734000			245	13	233	764;765;766;767;768;769	997;998;999;1000;1001;1002;1003;1004;1005	1005
ETSLDISSK	Unmodified	978.48696	0.4869555	29;24	F1N3M8;G3MYP5	no	no	0	0	0	0	1			36.197	36.197	2	0.039678	1	4060	20140904-PurClathDigest-1ug-01	79.489	60.127	4336600	4336600	0	0			246	24;29	234	770	1006	1006
ETSPESSLIQDEIAIK	Unmodified	1758.8887	0.8887248	13	F1MEW3	yes	yes	0	0	0	0		1	1	47.32	47.32	2	0.001028	2	6414	20140904-PurClathDigest-1ug-02	98.281	80.265	32471000	0	18352000	14119000			247	13	235	771;772	1007;1008	1007
ETVDQVEELRR	Unmodified	1372.6947	0.69465686	6	E1BDX8	yes	yes	0	0	0	1			1	37.776	37.776	3	0.046361	1	3837	20140904-PurClathDigest-1ug-03	47.302	32.622	2313300	0	0	2313300			248	6	236	773	1009	1009
EVAAEETAKPGPDK	Unmodified	1440.7096	0.70963822	29	G3MYP5	yes	yes	0	0	0	1	2	2	2	31.312	31.312	2;3	3.1715E-05	6	2801	20140904-PurClathDigest-1ug-01	135.91	105.58	34116000	20957000	8234200	4924500			249	29	237	774;775;776;777;778;779	1010;1011;1012;1013;1014;1015	1010
EVAAEETAKPGPDKGALEEEGK	Unmodified	2254.0965	0.096485745	29	G3MYP5	yes	yes	0	0	0	2	2	2	1	34.134	34.134	2;3	3.0684E-08	5	3501	20140904-PurClathDigest-1ug-01	183.63	181.14	45061000	24390000	13027000	7643100			250	29	238	780;781;782;783;784	1016;1017;1018;1019;1020	1017
EVDEQMLAIQSK	Oxidation (M)	1405.6759	0.67589525	46	Q2T9S0	yes	yes	0	0	1	0	1		1	38.007	38.007	2	0.012502	2	4498	20140904-PurClathDigest-1ug-01	91.62	80.52	9483500	7258500	0	2225000			251	46	239	785;786	1021;1022	1021		181
EVDEQMLNVQNK	Oxidation (M)	1461.677	0.67695789	47;8;45	Q2KJD0;E1B953;Q3MHM5;E1BJB1;Q6B856	no	no	0	0	1	0	1		1	35.92	35.92	2	0.00044248	2	3413	20140904-PurClathDigest-1ug-03	128.85	99.297	61299000	40158000	0	21141000			252	45;47;8	240	787;788	1023;1024	1024		44
EVTQLR	Unmodified	744.413	0.41300269	3	CON__P35527	yes	yes	0	0	0	0	1			32.873	32.873	2	0.039386	1	3205	20140904-PurClathDigest-1ug-01	85.061	4.5633	3690700	3690700	0	0		+	253	3	241	789	1025	1025
EVVAGSHELGQDYEHVTMLQER	Oxidation (M)	2542.1758	0.17581547	20	F1MYC9	yes	yes	0	0	1	0		1	1	41.391	41.391	3	9.9076E-14	2	4670	20140904-PurClathDigest-1ug-03	141.36	140.2	24938000	0	16892000	8046700			254	20	242	790;791	1026;1027	1027		77
EVVPDVPEER	Unmodified	1167.5772	0.57716749	29;24	F1N3M8;G3MYP5	no	no	0	0	0	0	1	1	1	38.982	38.982	2	0.00016172	3	4710	20140904-PurClathDigest-1ug-01	145.25	120.41	63951000	35080000	20052000	8819000			255	24;29	243	792;793;794	1028;1029;1030	1028
EWYQETHEK	Unmodified	1248.5411	0.54111633	22	F1N1S2	yes	yes	0	0	0	0	1	1	1	35.583	35.583	2	0.00049404	3	3363	20140904-PurClathDigest-1ug-03	143.03	124.7	20505000	11140000	4562600	4802400			256	22	244	795;796;797	1031;1032;1033	1033
EYQDLLNVK	Unmodified	1120.5764	0.57643921	12;32;40;19	F1MSQ6;O62654;P02548;F1MDZ2;O77788;Q08DH7	no	no	0	0	0	0	1	1	1	43.677	43.677	2	0.0045448	4	5492	20140904-PurClathDigest-1ug-02	107.57	94.566	650400000	326700000	173610000	150090000			257	19;32;12;40	245	798;799;800	1034;1035;1036;1037	1035
EYQTQLIQR	Unmodified	1177.6091	0.60913632	6	E1BDX8	yes	yes	0	0	0	0	1	1	1	38.589	38.589	2	0.00042453	3	4058	20140904-PurClathDigest-1ug-03	149.82	96.041	16583000	9862600	4233400	2486800			258	6	246	801;802;803	1038;1039;1040	1040
FAALEQPEVER	Unmodified	1287.6459	0.64591575	13	F1MEW3	yes	yes	0	0	0	0	1	1	1	41.013	41.013	2	3.7472E-05	5	4831	20140904-PurClathDigest-1ug-02	140.24	90.943	247180000	114670000	83622000	48891000			259	13	247	804;805;806	1041;1042;1043;1044;1045	1043
FADLNDAAAR	Unmodified	1062.5094	0.50942227	43	Q28115	yes	yes	0	0	0	0	2	1	1	38.687	38.687	1;2	9.9197E-05	4	4641	20140904-PurClathDigest-1ug-01	163.16	126.71	204670000	137730000	37292000	29651000			260	43	248	807;808;809;810	1046;1047;1048;1049	1046
FAGYIDK	Unmodified	812.40685	0.40685468	19	F1MSQ6	yes	yes	0	0	0	0	1		1	37.925	37.925	2	0.026005	2	4456	20140904-PurClathDigest-1ug-01	90.777	47.777	35847000	25085000	0	10762000			261	19	249	811;812	1050;1051	1050
FAGYIDKVR	Unmodified	1067.5764	0.57637963	19	F1MSQ6	yes	yes	0	0	0	1	1	1	1	38.233	38.233	2	0.00014263	3	4148	20140904-PurClathDigest-1ug-02	182.53	169.72	23157000	13318000	6206100	3632800			262	19	250	813;814;815	1052;1053;1054	1053
FAGYIEK	Unmodified	826.4225	0.42250475	12	F1MDZ2;O77788	yes	no	0	0	0	0	1	1	1	37.945	37.945	2	0.027752	3	4442	20140904-PurClathDigest-1ug-01	89.55	36.867	215470000	119750000	56187000	39539000			263	12	251	816;817;818	1055;1056;1057	1055
FANLNEQAAR	Unmodified	1132.5625	0.56252048	40	Q08DH7	yes	yes	0	0	0	0	1	1	1	37.026	37.026	2	2.9102E-05	6	3846	20140904-PurClathDigest-1ug-02	185.81	160.19	183370000	91286000	51706000	40376000			264	40	252	819;820;821	1058;1059;1060;1061;1062;1063	1060
FANLNEQAAR	Deamidation (NQ)	1133.5465	0.54653606	40	Q08DH7	yes	yes	0	1	0	0	1	1	1	37.824	37.824	2	0.00037172	3	3861	20140904-PurClathDigest-1ug-03	182.65	130.07	29429000	18100000	6822300	4506300			265	40	252	822;823;824	1064;1065;1066	1066	53
FAQEAEAAR	Unmodified	991.47231	0.47230849	19	F1MSQ6	yes	yes	0	0	0	0	1	1	1	32.845	32.845	2	0.00030262	3	3161	20140904-PurClathDigest-1ug-01	164.71	144.57	65580000	32675000	20171000	12733000			266	19	253	825;826;827	1067;1068;1069	1067
FASFIDK	Unmodified	826.4225	0.42250475	4	CON__P35908;CON__Q9R0H5;CON__Q6NXH9;G3MYU2;CON__Q7Z794	no	no	0	0	0	0	1	1	1	42.064	42.064	2	0.0058548	3	5510	20140904-PurClathDigest-1ug-01	128.57	17.954	13192000	6296300	4501900	2393400		+	267	4	254	828;829;830	1070;1071;1072	1070
FASFIDKVR	Unmodified	1081.592	0.59202969	4	CON__P35908;CON__Q9R0H5;CON__Q6NXH9;G3MYU2;CON__Q7Z794	no	no	0	0	0	1			1	41.797	41.797	3	0.00011183	1	4782	20140904-PurClathDigest-1ug-03	170.24	16.529	3595200	0	0	3595200		+	268	4	255	831	1073	1073
FASFIER	Unmodified	868.4443	0.44430282	32	P02548	yes	yes	0	0	0	0	1	1	1	42.698	42.698	2	0.0040986	4	5250	20140904-PurClathDigest-1ug-02	143	38.556	217720000	109600000	51014000	57106000			269	32	256	832;833;834	1074;1075;1076;1077	1076
FASYIEK	Unmodified	856.43307	0.43306943	43	Q28115	yes	yes	0	0	0	0	1	1	1	38.371	38.371	2	0.030708	4	4164	20140904-PurClathDigest-1ug-02	87.323	34.639	51583000	28608000	14063000	8911400			270	43	257	835;836;837	1078;1079;1080;1081	1079
FAVFIEK	Unmodified	852.47454	0.47454032	40	Q08DH7	yes	yes	0	0	0	0		1	1	45.039	45.039	1	0.0054552	2	5829	20140904-PurClathDigest-1ug-02	94.262	49.57	12102000	0	6925000	5177400			271	40	258	838;839	1082;1083	1082
FDVNTSAVQVLIEHIGNLDR	Unmodified	2239.1597	0.15969512	38	P49951;F1MPU0	yes	no	0	0	0	0	2	2	2	57.353	57.353	2;3	1.2031E-43	7	8352	20140904-PurClathDigest-1ug-03	299.43	292.78	113010000	64151000	35092000	13769000			272	38	259	840;841;842;843;844;845	1084;1085;1086;1087;1088;1089;1090	1089
FEEEAR	Unmodified	779.34498	0.34498271	12	F1MDZ2;O77788	yes	no	0	0	0	0		1	1	32.061	32.061	2	0.0093401	2	2693	20140904-PurClathDigest-1ug-02	138.38	12.337	9346700	0	5443300	3903400			273	12	260	846;847	1091;1092	1091
FEELNADLFR	Unmodified	1252.6088	0.60880197	36	P19120	no	no	0	0	0	0	1	1		48.837	48.837	2	0.00024998	2	7349	20140904-PurClathDigest-1ug-01	128.35	107.51	11954000	7846500	4107200	0			274	36	261	848;849	1093;1094	1093
FESLEPEMNNQASR	Oxidation (M)	1666.7257	0.72569899	20	F1MYC9	yes	yes	0	0	1	0	1	1	1	38.462	38.462	2	3.4637E-07	3	4013	20140904-PurClathDigest-1ug-03	148.52	145.2	18731000	10059000	4758400	3913200			275	20	262	850;851;852	1095;1096;1097	1097		78
FGDPVVQSDMK	Oxidation (M)	1237.5649	0.56488824	42	Q27975;Q27965	yes	no	0	0	1	0	1	1		37.396	37.396	2	0.0087749	2	3998	20140904-PurClathDigest-1ug-02	81.676	76.363	6629700	6629700	0	0			276	42	263	853;854	1098;1099	1099		169
FGNPLLVQDVESYDPVLNPVLNR	Unmodified	2597.349	0.34895246	6	E1BDX8	yes	yes	0	0	0	0	1	1	1	56.128	56.128	2	0.0035357	3	8203	20140904-PurClathDigest-1ug-03	69.765	68.834	12972000	7650000	3577400	1745100			277	6	264	855;856;857	1100;1101;1102	1102
FGQMLGSNMTEFHSQISK	2 Oxidation (M)	2072.9296	0.92956053	6	E1BDX8	yes	yes	0	0	2	0	1	1	1	39.409	39.409	3	0.00022095	3	4245	20140904-PurClathDigest-1ug-03	94.569	92.518	26200000	16597000	5863000	3740000			278	6	265	858;859;860	1103;1104;1105	1105		19;20
FILKPAIK	Unmodified	928.61097	0.61097422	13	F1MEW3	yes	yes	0	0	0	1	1	2	2	40.083	40.083	2;3	0.033795	5	4602	20140904-PurClathDigest-1ug-02	89.046	69.26	39042000	12231000	16432000	10378000			279	13	266	861;862;863;864;865	1106;1107;1108;1109;1110	1108
FIQYLASR	Unmodified	996.53927	0.53926584	15	F1MGT4;F1N605	yes	no	0	0	0	0	1		1	42.058	42.058	2	0.00098927	2	5537	20140904-PurClathDigest-1ug-01	150.05	97.338	12418000	10051000	0	2367600			280	15	267	866;867	1111;1112	1111
FLEQQNK	Unmodified	905.46068	0.46068117	43	Q28115;F1N566;CON__H-INV:HIT000292931;CON__Q61726;E1B898;CON__O43790;CON__Q6NT21;CON__P78385;A6QP32;A4FUZ0;Q148H4;CON__Q14533;Q0VD04;CON__P78386;CON__Q8N1N4-2;CON__Q7RTT2;A6QNX5	no	no	0	0	0	0	1	1	1	33.706	33.706	2	0.0067186	3	3098	20140904-PurClathDigest-1ug-02	119.57	30.832	105530000	59037000	20997000	25494000			281	43	268	868;869;870	1113;1114;1115	1114
FLEQQNQVLQTK	Unmodified	1474.778	0.77799256	1;4	CON__P04264;CON__P35908;CON__Q9R0H5;CON__Q6NXH9;G3MYU2;CON__Q7Z794;E1B991;G3MZ71	no	no	0	0	0	0	1	1	1	40.026	40.026	2	6.1185E-07	3	4966	20140904-PurClathDigest-1ug-01	165.72	136.42	342520000	207550000	70492000	64485000		+	282	1;4	269	871;872;873	1116;1117;1118	1116
FMELLEPLNER	Oxidation (M)	1405.6912	0.69115139	20	F1MYC9	yes	yes	0	0	1	0	1			45.981	45.981	2	0.022897	1	6646	20140904-PurClathDigest-1ug-01	97.163	86.216	12947000	12947000	0	0			283	20	270	874	1119	1119		79
FNALFAQGNYSEAAK	Unmodified	1629.7787	0.77872084	38	P49951;F1MPU0	yes	no	0	0	0	0	1	1	1	44.972	44.972	2	1.1777E-07	6	6229	20140904-PurClathDigest-1ug-01	160.65	147.14	1322500000	962020000	208890000	151540000			284	38	271	875;876;877	1120;1121;1122;1123;1124;1125	1120
FNALFVRPHIR	Unmodified	1368.7779	0.7778734	6	E1BDX8	yes	yes	0	0	0	1	1			41.228	41.228	3	0.062127	1	5331	20140904-PurClathDigest-1ug-01	32.218	23.214	2181700	2181700	0	0			285	6	272	878	1126	1126
FNYGFEYLGVQDK	Unmodified	1578.7355	0.73545904	6	E1BDX8	yes	yes	0	0	0	0		1	1	49.446	49.446	2	0.0015888	2	6698	20140904-PurClathDigest-1ug-03	96.464	75.404	4934800	0	2276200	2658600			286	6	273	879;880	1127;1128	1128
FQDWDKTSLENTFIHNTGK	Unmodified	2280.0811	0.081110453	14	F1MGK5	yes	yes	0	0	0	1	2	2	2	45.533	45.533	3;4	4.7413E-22	6	6000	20140904-PurClathDigest-1ug-02	214.66	205.28	110020000	55232000	31190000	23594000			287	14	274	881;882;883;884;885;886	1129;1130;1131;1132;1133;1134	1131
FQEHLQLQNLGINPANIGFSTLTMESDK	Oxidation (M)	3160.5499	0.54991346	38	P49951	yes	yes	0	0	1	0	1	1	1	51.665	51.665	3	0.0026602	6	7440	20140904-PurClathDigest-1ug-02	80.722	79.545	929810000	355650000	322450000	251700000			288	38	275	887;888;889	1135;1136;1137;1138;1139;1140	1137		146
FQEHLQLQNLGINPANIGFSTLTMESDK	Unmodified	3144.555	0.55499884	38	P49951	yes	yes	0	0	0	0	1	1	1	52.605	52.605	3	0.00010671	3	7433	20140904-PurClathDigest-1ug-03	91.1	89.923	48759000	20216000	13992000	14551000			289	38	275	890;891;892	1141;1142;1143	1143
FQFFQR	Unmodified	871.43407	0.43407249	7	E1BFB0	yes	yes	0	0	0	0	1	1	1	45.792	45.792	2	0.0042508	3	6481	20140904-PurClathDigest-1ug-01	154.44	137.89	12066000	7110300	2653200	2302300			290	7	276	893;894;895	1144;1145;1146	1144
FSPEVPGQK	Unmodified	987.50255	0.50254598	22	F1N1S2	yes	yes	0	0	0	0	1	1	1	37.631	37.631	2	0.0087324	3	3832	20140904-PurClathDigest-1ug-03	98.582	68.264	26404000	15515000	6381800	4507200			291	22	277	896;897;898	1147;1148;1149	1149
FSSSSGYGGGSSR	Unmodified	1234.5214	0.52144352	3	CON__P35527	yes	yes	0	0	0	0	1	1	1	33.235	33.235	2	3.6294E-07	3	3258	20140904-PurClathDigest-1ug-01	171.26	157.86	34983000	18646000	7158100	9179000		+	292	3	278	899;900;901	1150;1151;1152	1150
FSTFAGSITGPLYTHR	Unmodified	1753.8788	0.87876924	12	F1MDZ2;O77788	yes	no	0	0	0	0	2	2	2	46.137	46.137	2;3	1.0413E-13	6	6572	20140904-PurClathDigest-1ug-01	212.39	209.73	488910000	280410000	119820000	88684000			293	12	279	902;903;904;905;906;907	1153;1154;1155;1156;1157;1158	1154
FSVEDNR	Unmodified	865.393	0.39299553	9	E1BKN2	yes	yes	0	0	0	0	1	1	1	35.422	35.422	2	0.0021386	3	3517	20140904-PurClathDigest-1ug-02	164.89	92.943	23012000	12397000	6421100	4193600			294	9	280	908;909;910	1159;1160;1161	1160
FTQDTQPHYIYSPR	Unmodified	1751.8267	0.82673367	6	E1BDX8	yes	yes	0	0	0	0		1		39.154	39.154	3	0.0072461	1	4376	20140904-PurClathDigest-1ug-02	59.68	53.858	2773100	0	2773100	0			295	6	281	911	1162	1162
FTVLTESAAK	Unmodified	1065.5706	0.57062555	32	P02548	yes	yes	0	0	0	0	1	1	1	40.423	40.423	2	0.0027659	5	4683	20140904-PurClathDigest-1ug-02	113.93	103.14	423280000	222260000	108000000	93014000			296	32	282	912;913;914	1163;1164;1165;1166;1167	1165
FWEVISDEHGIDPTGSYHGDSDLQLER	Unmodified	3101.4003	0.40027234	8	E1BJB1;Q6B856;G3X7R7;G3N1W7	yes	no	0	0	0	0	1	1	1	47.565	47.565	3	5.6368E-05	3	6470	20140904-PurClathDigest-1ug-02	94.73	32.537	55594000	32201000	13413000	9980500			297	8	283	915;916;917	1168;1169;1170	1169
FWEVISDEHGIDPTGTYHGDSDLQLDR	Unmodified	3101.4003	0.40027234	45	Q2KJD0	yes	yes	0	0	0	0		1	1	47.617	47.617	3;4	1.4781E-07	2	6259	20140904-PurClathDigest-1ug-03	103.33	22.665	23525000	0	13413000	10112000			298	45	284	918;919	1171;1172	1172
FWEVISDEHGIDPTGTYHGDSDLQLER	Unmodified	3115.4159	0.4159224	47;49	Q3MHM5;Q3ZBU7	no	no	0	0	0	0	1	2	2	47.678	47.678	3;4	5.3947E-05	5	6249	20140904-PurClathDigest-1ug-03	87.196	87.095	53844000	21937000	18190000	13716000			299	47;49	285	920;921;922;923;924	1173;1174;1175;1176;1177	1177
FYFVGDEDLLEIIGNSK	Unmodified	1957.9673	0.96730947	6	E1BDX8	yes	yes	0	0	0	0	1	1		57.658	57.658	2	0.0013659	2	9499	20140904-PurClathDigest-1ug-01	72.433	70.211	4033600	3046100	987520	0			300	6	286	925;926	1178;1179	1178
GADEAALAR	Unmodified	872.43519	0.4351947	32	P02548	yes	yes	0	0	0	0	1	1	1	33.708	33.708	2	0.0030466	3	2941	20140904-PurClathDigest-1ug-03	117.89	57.102	24488000	13393000	5754000	5341300			301	32	287	927;928;929	1180;1181;1182	1182
GANESLER	Unmodified	874.41446	0.41445926	40	Q08DH7	yes	yes	0	0	0	0	1	1	1	31.88	31.88	2	0.0010784	3	2929	20140904-PurClathDigest-1ug-01	132.08	32.165	85068000	39470000	27533000	18065000			302	40	288	930;931;932	1183;1184;1185	1183
GAQELAASSQQK	Unmodified	1216.6048	0.60477922	21	Q2KJ21;F1N037	yes	no	0	0	0	0			1	32.438	32.438	2	0.00018756	1	2637	20140904-PurClathDigest-1ug-03	124.21	83.71	2016000	0	0	2016000			303	21	289	933	1186	1186
GDSALFAVNGFNILVDGGSDR	Unmodified	2123.0283	0.028346601	29;24	F1N3M8;G3MYP5	no	no	0	0	0	0	1		1	55.088	55.088	2	0.00075509	2	8011	20140904-PurClathDigest-1ug-03	88.176	85.681	7389900	5154700	0	2235300			304	24;29	290	934;935	1187;1188	1188
GDSALFAVNGFNILVDGGSDR	Deamidation (NQ)	2124.0124	0.012362185	29;24	F1N3M8;G3MYP5	no	no	0	1	0	0		1	1	54.786	54.786	2	3.773E-05	2	7902	20140904-PurClathDigest-1ug-03	136.49	132.95	15981000	0	8913200	7068000			305	24;29	290	936;937	1189;1190	1190	9
GEIDAHEDSFK	Unmodified	1246.5466	0.54659564	7	E1BFB0	yes	yes	0	0	0	0	1			35.52	35.52	2	4.4886E-06	1	3907	20140904-PurClathDigest-1ug-01	153.54	108.99	2221600	2221600	0	0			306	7	291	938	1191	1191
GELSPSFLNPPLPR	Unmodified	1522.8144	0.81437807	29;24	F1N3M8;G3MYP5	no	no	0	0	0	0	1	1	1	49.117	49.117	2	1.7223E-07	3	6644	20140904-PurClathDigest-1ug-03	137.84	131.36	22199000	11086000	6904500	4207600			307	24;29	292	939;940;941	1192;1193;1194	1194
GFQEPAPQK	Unmodified	1000.4978	0.49779495	29	G3MYP5	yes	yes	0	0	0	0	1	1	1	34.343	34.343	2	0.00049801	3	3242	20140904-PurClathDigest-1ug-02	125.16	109.28	50800000	28542000	11613000	10645000			308	29	293	942;943;944	1195;1196;1197	1196
GFSSGSAVVSGGSR	Unmodified	1253.6	0.60002819	4	CON__P35908	no	no	0	0	0	0	1	1	1	36.35	36.35	2	7.5584E-08	3	3536	20140904-PurClathDigest-1ug-03	159.5	149.84	39423000	20678000	9926600	8818800		+	309	4	294	945;946;947	1198;1199;1200	1200
GGGGGGYGSGGSSYGSGGGSYGSGGGGGGGR	Unmodified	2382.9446	0.94456998	1	CON__P04264	yes	yes	0	0	0	0	1	1	1	34.75	34.75	2	1.1484E-10	3	3350	20140904-PurClathDigest-1ug-02	172.06	139.45	31474000	11564000	8756000	11153000		+	310	1	295	948;949;950	1201;1202;1203	1202
GGGGSFGYSYGGGSGGGFSASSLGGGFGGGSR	Unmodified	2704.1538	0.15383448	3	CON__P35527	yes	yes	0	0	0	0		1		47.756	47.756	2	0.013937	1	6515	20140904-PurClathDigest-1ug-02	90.363	81.184	7660400	0	7660400	0		+	311	3	296	951	1204	1204
GGQVQIVTK	Unmodified	928.53418	0.53418046	13	F1MEW3	yes	yes	0	0	0	0	1	1	1	34.419	34.419	2	0.00049834	3	3100	20140904-PurClathDigest-1ug-03	126.55	41.804	109810000	64098000	25918000	19795000			312	13	297	952;953;954	1205;1206;1207	1207
GGSGGGGSISGGGYGSGGGSGGR	Unmodified	1740.7412	0.74116614	4	CON__P35908	yes	yes	0	0	0	0	1		1	33.209	33.209	2	2.6042E-05	2	2837	20140904-PurClathDigest-1ug-03	114.39	112.9	6854600	4616200	0	2238400		+	313	4	298	955;956	1208;1209	1209
GGSGGSYGGGGSGGGYGGGSGSR	Unmodified	1790.7204	0.72043069	3	CON__P35527	yes	yes	0	0	0	0	1	1	1	32.6	32.6	2	2.8258E-28	3	2686	20140904-PurClathDigest-1ug-03	243.99	100.48	40011000	19919000	10049000	10044000		+	314	3	299	957;958;959	1210;1211;1212	1212
GGSISGGGYGSGGGK	Unmodified	1196.5422	0.54217896	4	CON__P35908	yes	yes	0	0	0	0		1	1	32.661	32.661	2	0.014097	2	2845	20140904-PurClathDigest-1ug-02	79.804	67.307	8581900	0	4647400	3934600		+	315	4	300	960;961	1213;1214	1213
GGSSSGGGYGSGGGGSSSVK	Unmodified	1587.6761	0.67610626	4	CON__P35908	yes	yes	0	0	0	0	1		1	31.235	31.235	2	3.0566E-12	2	2381	20140904-PurClathDigest-1ug-03	170.38	159.65	4964400	3847300	0	1117100		+	316	4	301	962;963	1215;1216	1216
GHEFSIPFVEMK	Oxidation (M)	1435.6806	0.6805867	9	E1BKN2	yes	yes	0	0	1	0	1	1		45.934	45.934	2	4.2756E-06	2	6550	20140904-PurClathDigest-1ug-01	168.98	164.83	19409000	13149000	6260500	0			317	9	302	964;965	1217;1218	1217		49
GHYTEGAELVDAVLDVVR	Unmodified	1941.9796	0.97960549	49	Q3ZBU7	yes	yes	0	0	0	0	1	1	1	55.98	55.98	3	7.0863E-13	3	9110	20140904-PurClathDigest-1ug-01	162.79	158.31	9510100	5611600	1856700	2041800			318	49	303	966;967;968	1219;1220;1221	1219
GHYTEGAELVDAVLDVVRK	Unmodified	2070.0746	0.074568512	49	Q3ZBU7	yes	yes	0	0	0	1	1	1	1	53.167	53.167	3	2.2796E-18	3	8458	20140904-PurClathDigest-1ug-01	205.12	204.77	24717000	16300000	4900100	3516000			319	49	304	969;970;971	1222;1223;1224	1222
GHYTEGAELVDSVLDVVR	Unmodified	1957.9745	0.97452012	47;8;45;46	Q2KJD0;Q3MHM5;G3X7R8;Q2HJ81;E1BJB1;Q6B856;G3X7R7;G3N1W7;Q2T9S0	no	no	0	0	0	0	2	2	2	53.17	53.17	2;3	3.809E-27	6	7844	20140904-PurClathDigest-1ug-02	246.95	232.97	138940000	90005000	25154000	23784000			320	45;47;8;46	305	972;973;974;975;976;977	1225;1226;1227;1228;1229;1230	1228
GHYTEGAELVDSVLDVVRK	Unmodified	2086.0695	0.069483134	47;8;45;46	Q2KJD0;Q3MHM5;G3X7R8;Q2HJ81;E1BJB1;Q6B856;G3X7R7;G3N1W7;Q2T9S0	no	no	0	0	0	1	1	1	1	51.345	51.345	3	3.6407E-22	4	7397	20140904-PurClathDigest-1ug-02	225.13	224.28	48323000	14444000	20677000	13201000			321	45;47;8;46	306	978;979;980	1231;1232;1233;1234	1233
GHYTIGK	Unmodified	774.40244	0.40243801	44	Q2HJ86;F2Z4C1;F6RP72;F2Z4K0;Q32KN8;Q3ZCJ7;F1MNF8	no	no	0	0	0	0	1	1	1	31.854	31.854	2	0.002764	3	2523	20140904-PurClathDigest-1ug-03	158.12	71.251	19742000	9200500	6999800	3541300			322	44	307	981;982;983	1235;1236;1237	1237
GIDLTQVK	Unmodified	872.49673	0.49673232	25	F1N690;F1N4X1	yes	no	0	0	0	0	1			39.996	39.996	2	0.01407	1	5052	20140904-PurClathDigest-1ug-01	95.741	15.303	7493400	7493400	0	0			323	25	308	984	1238	1238
GLDFSDR	Unmodified	808.37153	0.37153181	50	Q3ZCF0	yes	yes	0	0	0	0	1			39.431	39.431	2	0.040045	1	4888	20140904-PurClathDigest-1ug-01	86.872	25.378	3216600	3216600	0	0			324	50	309	985	1239	1239
GLEPGQEYSILLTAEK	Unmodified	1746.904	0.90398093	18	F1MRZ5;F1MRZ6	yes	no	0	0	0	0		1	1	49.328	49.328	2	4.6427E-05	2	6662	20140904-PurClathDigest-1ug-03	117	112.38	6446000	0	2858500	3587500			325	18	310	986;987	1240;1241	1241
GLETIANDVVSLATK	Unmodified	1529.8301	0.83008771	25	F1N690	yes	yes	0	0	0	0	1	1	1	54.832	54.832	2	4.5989E-11	3	8215	20140904-PurClathDigest-1ug-02	189.1	177.18	24363000	13693000	4774800	5895000			326	25	311	988;989;990	1242;1243;1244	1243
GLSSVPEVAEVEPSK	Unmodified	1526.7828	0.78280317	13	F1MEW3	yes	yes	0	0	0	0	1	1	1	42.149	42.149	2	0.0020595	4	5547	20140904-PurClathDigest-1ug-01	85.493	82.175	107260000	67915000	22057000	17286000			327	13	313	991;992;993	1245;1246;1247;1248	1245
GLSSVPEVAEVEPSKK	Unmodified	1654.8778	0.87776618	13	F1MEW3	yes	yes	0	0	0	1	2	1	1	39.949	39.949	2;3	0.0066311	4	4583	20140904-PurClathDigest-1ug-02	108.63	104.66	98346000	73611000	13918000	10818000			328	13	314	994;995;996;997	1249;1250;1251;1252	1251
GLVSSDELAK	Unmodified	1017.5342	0.53424004	7	E1BFB0	yes	yes	0	0	0	0	1	1	1	38.661	38.661	2	0.024828	3	4636	20140904-PurClathDigest-1ug-01	85.29	65.004	15363000	8398400	4205300	2759200			329	7	315	998;999;1000	1253;1254;1255	1253
GMIKEESVQIK	Oxidation (M)	1276.6697	0.66968766	13	F1MEW3	yes	yes	0	0	1	1	2	2	2	34.518	34.518	2;3	7.1164E-05	6	3291	20140904-PurClathDigest-1ug-02	164.9	132.68	281680000	173330000	66822000	41522000			330	13	316	1001;1002;1003;1004;1005;1006	1256;1257;1258;1259;1260;1261	1258		57
GNAMVEEGHFAAEDVK	Oxidation (M)	1718.757	0.75699912	7	E1BFB0	yes	yes	0	0	1	0	2		2	37.124	37.124	2;3	0.0010137	4	4270	20140904-PurClathDigest-1ug-01	89.358	85.38	40237000	33471000	0	6766100			331	7	317	1007;1008;1009;1010	1262;1263;1264;1265	1263		31
GPAAIQK	Unmodified	683.39662	0.39662435	3	CON__P35527	yes	yes	0	0	0	0		1		30.91	30.91	2	0.020526	1	2456	20140904-PurClathDigest-1ug-02	96.666	43.973	881510	0	881510	0		+	332	3	318	1011	1266	1266
GPGLGSTQGQTIALPAQGLIEFR	Unmodified	2310.2332	0.23319442	10	E1BMW9	yes	yes	0	0	0	0		1		51.732	51.732	2	3.8845E-09	1	7504	20140904-PurClathDigest-1ug-02	140.73	139.59	3943000	0	3943000	0			333	10	319	1012	1267	1267
GPLIQAEDTALHLAPVSIPEAR	Unmodified	2297.2379	0.23794545	29;24	F1N3M8;G3MYP5	no	no	0	0	0	0	2	2	1	49.946	49.946	2;3	1.2353E-22	7	6854	20140904-PurClathDigest-1ug-03	220.86	212.94	175600000	124990000	42350000	8266900			334	24;29	320	1013;1014;1015;1016;1017	1268;1269;1270;1271;1272;1273;1274	1274
GQAGGKLHIIEVGTPPTGNQPFPK	Unmodified	2442.3019	0.30194269	38	P49951;F1MPU0	yes	no	0	0	0	1	1	1	1	41.966	41.966	3	0.021753	3	4828	20140904-PurClathDigest-1ug-03	51.31	51.002	30670000	13423000	10065000	7182600			335	38	321	1018;1019;1020	1275;1276;1277	1277
GQEPPTDILK	Unmodified	1096.5764	0.57643921	13	F1MEW3	yes	yes	0	0	0	0	1	1	1	40.155	40.155	2	0.024654	5	4981	20140904-PurClathDigest-1ug-01	83.499	74.541	37151000	20872000	9023300	7255700			336	13	322	1021;1022;1023	1278;1279;1280;1281;1282	1278
GQFSTDELVAEVEK	Unmodified	1550.7464	0.74641766	38	P49951;F1MPU0	yes	no	0	0	0	0	1	1	1	47.38	47.38	2	8.4221E-05	5	6427	20140904-PurClathDigest-1ug-02	118.51	111.56	306160000	142080000	73049000	91036000			337	38	323	1024;1025;1026	1283;1284;1285;1286;1287	1285
GQFSTDELVAEVEKR	Unmodified	1706.8475	0.84752869	38	P49951;F1MPU0	yes	no	0	0	0	1	5	3	2	47.102	47.102	2;3	2.5018E-21	37	6148	20140904-PurClathDigest-1ug-02	261.17	253.06	5855700000	2796600000	1611900000	1447100000			338	38	324	1027;1028;1029;1030;1031;1032;1033;1034;1035;1036	1288;1289;1290;1291;1292;1293;1294;1295;1296;1297;1298;1299;1300;1301;1302;1303;1304;1305;1306;1307;1308;1309;1310;1311;1312;1313;1314;1315;1316;1317;1318;1319;1320;1321;1322;1323;1324	1310
GSATGLSLK	Unmodified	832.46543	0.46543219	40	Q08DH7	yes	yes	0	0	0	0			1	37.096	37.096	2	0.052485	1	3669	20140904-PurClathDigest-1ug-03	76.228	36.923	11488000	0	0	11488000			339	40	325	1037	1325	1325
GSATGLSLKKEEEEEEASK	Unmodified	2020.9801	0.980059	40	Q08DH7	yes	yes	0	0	0	2	2	2	3	35.559	35.559	2;3;4	6.6051E-34	8	3540	20140904-PurClathDigest-1ug-02	301.59	280.29	349290000	158590000	91315000	99379000			340	40	326	1038;1039;1040;1041;1042;1043;1044	1326;1327;1328;1329;1330;1331;1332;1333	1330
GSDGAASSYQLK	Unmodified	1182.5517	0.55168102	16	F1MIC9	yes	yes	0	0	0	0	1		1	35.677	35.677	2	0.00026634	2	3396	20140904-PurClathDigest-1ug-03	117.79	91.675	4378100	2444400	0	1933700			341	16	327	1045;1046	1334;1335	1335
GSGGGSSGGSIGGR	Unmodified	1091.4956	0.49556312	1	CON__P04264	yes	yes	0	0	0	0		1	1	30.716	30.716	2	5.5013E-05	2	2275	20140904-PurClathDigest-1ug-03	135.81	127.12	5004200	0	2784200	2220100		+	342	1	328	1047;1048	1336;1337	1337
GSLGGGFSSGGFSGGSFSR	Unmodified	1706.7649	0.76486169	2	CON__P13645	yes	yes	0	0	0	0	1			44.666	44.666	2	2.0393E-05	1	6283	20140904-PurClathDigest-1ug-01	110.56	95.049	27927000	27927000	0	0		+	343	2	329	1049	1338	1338
GSPSTVSSSYK	Unmodified	1098.5193	0.51931826	12	F1MDZ2;O77788	yes	no	0	0	0	0	1	1	1	32.657	32.657	2	0.019896	3	3117	20140904-PurClathDigest-1ug-01	84.479	71.471	72849000	41944000	14603000	16301000			344	12	330	1050;1051;1052	1339;1340;1341	1339
GSPSTVSSSYKR	Unmodified	1254.6204	0.62042929	12	F1MDZ2;O77788	yes	no	0	0	0	1	2	2	2	31.442	31.442	2;3	5.4035E-06	6	2555	20140904-PurClathDigest-1ug-02	181.49	166.81	88366000	47603000	23269000	17495000			345	12	331	1053;1054;1055;1056;1057;1058	1342;1343;1344;1345;1346;1347	1344
GSSSGGGYSSGSSSYGSGGR	Unmodified	1739.6983	0.69829827	4	CON__P35908	yes	yes	0	0	0	0			1	32.848	32.848	2	1.5136E-05	1	2732	20140904-PurClathDigest-1ug-03	118.37	117.96	3064900	0	0	3064900		+	346	4	332	1059	1348	1348
GTEITHAVVIK	Unmodified	1166.6659	0.66592292	48	Q3SYW6	yes	yes	0	0	0	0	1	1	1	36.968	36.968	2	5.6489E-06	3	3694	20140904-PurClathDigest-1ug-03	148.28	113.53	7084700	3907300	1936000	1241500			347	48	333	1060;1061;1062	1349;1350;1351	1351
GTESPFEGKDEK	Unmodified	1322.599	0.59902514	22	F1N1S2	yes	yes	0	0	0	1		1	2	33.913	33.913	2;3	9.3593E-05	3	2970	20140904-PurClathDigest-1ug-03	150.51	54.282	6048600	0	2208100	3840600			348	22	334	1063;1064;1065	1352;1353;1354	1353
GTKWEMAR	Oxidation (M)	993.4702	0.4702	12	F1MDZ2;O77788	yes	no	0	0	1	1		1	1	32.334	32.334	2	0.012234	2	2630	20140904-PurClathDigest-1ug-03	110.22	94.339	3787600	0	2223700	1563900			349	12	335	1066;1067	1355;1356	1356		51
GTLDPVEK	Unmodified	857.44945	0.44944778	36	P19120	yes	yes	0	0	0	0	1			35.046	35.046	2	0.05126	1	3769	20140904-PurClathDigest-1ug-01	78.516	41.959	15085000	15085000	0	0			350	36	336	1068	1357	1357
GTNESLER	Unmodified	904.42502	0.42502394	43	Q28115	no	no	0	0	0	0	1	1	1	31.759	31.759	2	0.0010217	3	2496	20140904-PurClathDigest-1ug-03	139.97	73.541	33011000	18142000	8527500	6341500			351	43	337	1069;1070;1071	1358;1359;1360	1360
GTQGVVTNFEIFR	Unmodified	1466.7518	0.75177781	0	A7MB16	yes	yes	0	0	0	0	1			49.342	49.342	2	1.2649E-06	1	7526	20140904-PurClathDigest-1ug-01	143.25	117.14	4542400	4542400	0	0			352	0	338	1072	1361	1361
GTVGEPTYDAEFQHFLR	Unmodified	1965.9221	0.92209062	6	E1BDX8	yes	yes	0	0	0	0	1			47.497	47.497	3	0.043383	1	7036	20140904-PurClathDigest-1ug-01	35.473	33.329	8203300	8203300	0	0			353	6	339	1073	1362	1362
GTYLATFHQR	Unmodified	1192.5989	0.59890598	0	A7MB16	yes	yes	0	0	0	0		1		38.674	38.674	2	2.6515E-05	1	4248	20140904-PurClathDigest-1ug-02	185.81	126.75	2019300	0	2019300	0			354	0	340	1074	1363	1363
GVIDMGNSLIDR	Oxidation (M)	1304.6395	0.63945017	7	E1BFB0	yes	yes	0	0	1	0	1		1	41.807	41.807	2	0.0097324	2	5485	20140904-PurClathDigest-1ug-01	108.72	83.016	7131100	4518300	0	2612700			355	7	341	1075;1076	1364;1365	1364		32
GVSGDRDENSFSLNSSISSAR	Unmodified	2184.0043	0.0043166946	13	F1MEW3	yes	yes	0	0	0	1	2	2	2	40.838	40.838	2;3	7.3311E-19	6	5180	20140904-PurClathDigest-1ug-01	221.14	219.73	85381000	39105000	25513000	20763000			356	13	342	1077;1078;1079;1080;1081;1082	1366;1367;1368;1369;1370;1371	1366
GVVTNGLDVSPGDEK	Deamidation (NQ)	1486.7151	0.71511753	12	F1MDZ2;O77788	yes	no	0	1	0	0	1			41.039	41.039	2	0.007275	1	5316	20140904-PurClathDigest-1ug-01	103.79	82.732	4749100	4749100	0	0			357	12	343	1083	1372	1372	4
GYSFTTTAER	Unmodified	1131.5197	0.51965261	39	P63258;P60712;F1MRD0	yes	no	0	0	0	0	1	1	1	39.134	39.134	2	8.1067E-05	3	4189	20140904-PurClathDigest-1ug-03	166.19	142.16	58432000	25278000	17689000	15465000			358	39	344	1084;1085;1086	1373;1374;1375	1375
HAALVSELETTK	Unmodified	1297.6878	0.68778057	13	F1MEW3	yes	yes	0	0	0	0	1	1	1	39.13	39.13	2	3.5186E-19	3	4180	20140904-PurClathDigest-1ug-03	276.95	249.48	301840000	164230000	75785000	61830000			359	13	345	1087;1088;1089	1376;1377;1378	1378
HALDANQGTATGPR	Unmodified	1407.6855	0.68548916	37	P22439	yes	yes	0	0	0	0	1	1		31.634	31.634	2	1.4362E-07	2	2892	20140904-PurClathDigest-1ug-01	141.85	133.44	7318800	5153300	2165600	0			360	37	346	1090;1091	1379;1380	1379
HDEYLEVTK	Unmodified	1132.5401	0.5400537	29	G3MYP5	yes	yes	0	0	0	0	1			36.449	36.449	2	3.5238E-05	1	4122	20140904-PurClathDigest-1ug-01	195.58	139.03	19740000	19740000	0	0			361	29	347	1092	1381	1381
HDVVFLITK	Unmodified	1070.6124	0.61243078	38	P49951;F1MPU0	yes	no	0	0	0	0	2	1	1	43.195	43.195	2	0.00018142	22	10069	20140904-PurClathDigest-1ug-01	102.52	73.566	2198900000	1138800000	613880000	446260000			362	38	348	1093;1094;1095;1096	1382;1383;1384;1385;1386;1387;1388;1389;1390;1391;1392;1393;1394;1395;1396;1397;1398;1399;1400;1401;1402;1403	1389
HEIVAAAASFAPALLQPDDQK	Unmodified	2191.1273	0.12733236	13	F1MEW3	yes	yes	0	0	0	0			1	48.091	48.091	2	1.911E-18	1	6325	20140904-PurClathDigest-1ug-03	198.24	193.31	6988500	0	0	6988500			363	13	349	1097	1404	1404
HELIEFR	Unmodified	942.49232	0.49231565	38	P49951;F1MPU0	yes	no	0	0	0	0	2	2	2	40.41	40.41	1;2	2.0374E-06	15	4778	20140904-PurClathDigest-1ug-02	225.8	125.06	1352800000	762430000	378280000	212070000			364	38	350	1098;1099;1100;1101;1102;1103	1405;1406;1407;1408;1409;1410;1411;1412;1413;1414;1415;1416;1417;1418;1419	1411
HELIEFRR	Unmodified	1098.5934	0.59342667	38	P49951;F1MPU0	yes	no	0	0	0	1		1	1	37.774	37.774	3	0.00021455	2	3845	20140904-PurClathDigest-1ug-03	163.04	106.49	3845800	0	1903700	1942100			365	38	351	1104;1105	1420;1421	1421
HGGGGGGFGGGGFGSR	Unmodified	1319.5755	0.57554478	4	CON__P35908	yes	yes	0	0	0	0	1	1		36.297	36.297	2	7.6442E-13	2	3998	20140904-PurClathDigest-1ug-01	180.49	177.37	12346000	7198500	5147300	0		+	366	4	352	1106;1107	1422;1423	1422
HGNSHQGEPR	Unmodified	1117.5013	0.5013172	2	CON__P13645	yes	yes	0	0	0	0	2	1	1	20.709	20.709	2;3	3.3641E-06	4	1625	20140904-PurClathDigest-1ug-01	110.38	95.702	791830	413100	178710	200020		+	367	2	353	1108;1109;1110;1111	1424;1425;1426;1427	1425
HGNSHQGEPR	Deamidation (NQ)	1118.4853	0.48533279	2	CON__P13645	yes	yes	0	1	0	0	1	1	1	20.827	20.827	2	0.0019835	3	1639	20140904-PurClathDigest-1ug-01	130.41	123.13	213630	130950	48277	34401		+	368	2	353	1112;1113;1114	1428;1429;1430	1428	0
HGVQELEIELQSQLSK	Unmodified	1836.9581	0.95814177	3	CON__P35527	yes	yes	0	0	0	0	1	2	2	48.571	48.571	2;3	9.6015E-23	5	6716	20140904-PurClathDigest-1ug-02	241.32	236.84	37930000	15962000	14715000	7252500		+	369	3	354	1115;1116;1117;1118;1119	1431;1432;1433;1434;1435	1432
HLDFLK	Unmodified	771.42792	0.42792448	22	F1N1S2;F1MF27	yes	no	0	0	0	0	1	1	1	40.333	40.333	2	0.01172	3	5049	20140904-PurClathDigest-1ug-01	118.06	37.679	30728000	16706000	8167300	5854400			370	22	355	1120;1121;1122	1436;1437;1438	1436
HLDFLKQPLATQK	Unmodified	1537.8617	0.86166261	22	F1N1S2	yes	yes	0	0	0	1		1	1	40.991	40.991	3	0.00079149	2	4582	20140904-PurClathDigest-1ug-03	102.87	96.862	8649900	0	4922000	3727900			371	22	356	1123;1124	1439;1440	1440
HLDFLR	Unmodified	799.43407	0.43407249	29;24	F1N3M8;G3MYP5	no	no	0	0	0	0	1	1	1	40.634	40.634	2	0.0022193	3	4738	20140904-PurClathDigest-1ug-02	175.34	89.432	61630000	31104000	21529000	8996900			372	24;29	357	1125;1126;1127	1441;1442;1443	1442
HLDRIDSVLLTHIGADNLPGINGLLQR	Deamidation (NQ)	2950.5989	0.59885299	29;24	F1N3M8;G3MYP5	no	no	0	1	0	1	1	1	1	50.738	50.738	3	8.5921E-05	3	7021	20140904-PurClathDigest-1ug-03	128.98	128.34	28032000	11802000	8381500	7848700			373	24;29	358	1128;1129;1130	1444;1445;1446	1446	10
HLDRIDSVLLTHIGADNLPGINGLLQR	Unmodified	2949.6148	0.6148374	29;24	F1N3M8;G3MYP5	no	no	0	0	0	1	1			51.473	51.473	4	0.052448	1	8078	20140904-PurClathDigest-1ug-01	28.128	27.707	7028300	7028300	0	0			374	24;29	358	1131	1447	1447
HLDRVDSILLTHIGDDNLPGINSMLQR	Oxidation (M)	3057.5666	0.56656658	22	F1N1S2	yes	yes	0	0	1	1	1	1	1	47.993	47.993	3	0.0001894	3	6597	20140904-PurClathDigest-1ug-02	109.23	106.67	48695000	26852000	11775000	10067000			375	22	359	1132;1133;1134	1448;1449;1450	1449		96
HLLGVEDLLQK	Unmodified	1263.7187	0.71868677	20	F1MYC9	yes	yes	0	0	0	0	1	1	1	46.754	46.754	2	5.2925E-09	3	6766	20140904-PurClathDigest-1ug-01	202.03	140.69	15853000	7514000	3299000	5039700			376	20	360	1135;1136;1137	1451;1452;1453	1451
HLLPVETQR	Unmodified	1091.6087	0.60874239	6	E1BDX8	yes	yes	0	0	0	0	1			36.613	36.613	2	0.00049592	1	4148	20140904-PurClathDigest-1ug-01	125.16	94.597	4457100	4457100	0	0			377	6	361	1138	1454	1454
HLQEALK	Unmodified	837.47085	0.47085192	29;24	F1N3M8;G3MYP5	no	no	0	0	0	0	1	1	1	31.795	31.795	2	0.0051974	3	2899	20140904-PurClathDigest-1ug-01	134.08	52.965	70278000	38414000	19099000	12765000			378	24;29	362	1139;1140;1141	1455;1456;1457	1455
HLQEYQDLLNVK	Unmodified	1498.778	0.77799256	43	Q28115	yes	yes	0	0	0	0	2	2	2	43.601	43.601	2;3	1.8426E-10	6	5264	20140904-PurClathDigest-1ug-03	219.89	195.64	411950000	276000000	73931000	62021000			379	43	363	1142;1143;1144;1145;1146;1147	1458;1459;1460;1461;1462;1463	1462
HMDPPPAPMQDR	2 Oxidation (M)	1422.602	0.6020188	22	F1N1S2	yes	yes	0	0	2	0	1	1	1	30.928	30.928	2	0.0055322	3	2448	20140904-PurClathDigest-1ug-02	74.392	70.815	10447000	5785800	2960000	1701200			380	22	364	1148;1149;1150	1464;1465;1466	1465		97;98
HNHDLSSYQDTIQQLENELR	Unmodified	2439.1415	0.14147888	12	F1MDZ2;O77788	yes	no	0	0	0	0	3	3	3	50.542	50.542	2;3;4	5.1831E-18	10	7176	20140904-PurClathDigest-1ug-02	190.83	189.51	413680000	219320000	100590000	93766000			381	12	365	1151;1152;1153;1154;1155;1156;1157;1158;1159	1467;1468;1469;1470;1471;1472;1473;1474;1475;1476	1472
HNIMDFAMPYFIQVMK	3 Oxidation (M)	2031.9257	0.92566113	38	P49951;F1MPU0	yes	no	0	0	3	0	2	2	2	46.983	46.983	2;3	0.0046615	16	6803	20140904-PurClathDigest-1ug-01	85.742	85.234	5293000000	2225100000	1517400000	1550500000			382	38	366	1160;1161;1162;1163;1164;1165	1477;1478;1479;1480;1481;1482;1483;1484;1485;1486;1487;1488;1489;1490;1491;1492	1477		147;148;149
HNIMDFAMPYFIQVMK	2 Oxidation (M)	2015.9307	0.93074651	38	P49951;F1MPU0	yes	no	0	0	2	0	1	1	2	50.211	50.211	2;3	1.8767E-05	9	6849	20140904-PurClathDigest-1ug-03	110.35	107.73	981890000	454380000	201230000	326280000			383	38	366	1166;1167;1168;1169	1493;1494;1495;1496;1497;1498;1499;1500;1501	1500		147;148;149
HNIMDFAMPYFIQVMK	Oxidation (M)	1999.9358	0.93583189	38	P49951;F1MPU0	yes	no	0	0	1	0	1	1		53.599	53.599	2	0.00018205	2	7872	20140904-PurClathDigest-1ug-02	112.17	108.53	9921900	6186300	3735500	0			384	38	366	1170;1171	1502;1503	1503		147;148;149
HQADIASYQEAIQQLDAELR	Unmodified	2298.124	0.1240379	19	F1MSQ6	yes	yes	0	0	0	0	2	2	2	51.611	51.611	2;3	1.2188E-54	6	7188	20140904-PurClathDigest-1ug-03	327.31	324.8	256080000	92102000	94893000	69089000			385	19	367	1172;1173;1174;1175;1176;1177	1504;1505;1506;1507;1508;1509	1509
HQAFEAELSANQSR	Unmodified	1586.7437	0.74373232	7	E1BFB0	yes	yes	0	0	0	0		1		37.755	37.755	2	6.007E-08	1	4030	20140904-PurClathDigest-1ug-02	153.94	104.49	4182300	0	4182300	0			386	7	368	1178	1510	1510
HQAFEAEVQANSGAIVK	Unmodified	1797.901	0.90096124	7	E1BFB0	yes	yes	0	0	0	0	1	1	1	40.116	40.116	2	1.2775E-13	3	4624	20140904-PurClathDigest-1ug-02	206.7	198.99	21246000	11602000	6386800	3257500			387	7	369	1179;1180;1181	1511;1512;1513	1512
HQGVMVGMGQK	2 Oxidation (M)	1202.5536	0.55361205	39	P63258;P60712;F1MRD0	no	no	0	0	2	0	1	1	1	30.6	30.6	2	0.0067913	3	2371	20140904-PurClathDigest-1ug-02	96.171	84.113	42949000	23650000	11432000	7866900			388	39	370	1182;1183;1184	1514;1515;1516	1515		164;165
HQILEQAVEDYAETVHQLSK	Unmodified	2337.1601	0.16008906	20	F1MYC9	yes	yes	0	0	0	0	1	1	1	51.114	51.114	3	7.4874E-06	3	7932	20140904-PurClathDigest-1ug-01	100.28	98.874	17034000	8693800	4312400	4027300			389	20	371	1185;1186;1187	1517;1518;1519	1517
HSAEVASYQDNIGQLENDLR	Unmodified	2258.0564	0.056352265	40	Q08DH7	yes	yes	0	0	0	0	2	2	2	46.612	46.612	2;3	7.7867E-44	9	5954	20140904-PurClathDigest-1ug-03	282.38	277.97	410020000	170600000	128420000	111010000			390	40	372	1188;1189;1190;1191;1192;1193	1520;1521;1522;1523;1524;1525;1526;1527;1528	1528
HSLAEEEESAKAEADAHVK	Unmodified	2049.9603	0.96032661	22	F1N1S2	yes	yes	0	0	0	1	2	2	2	38.473	38.473	3;4	3.8044E-18	6	4581	20140904-PurClathDigest-1ug-01	207.56	205.99	104360000	60007000	27017000	17339000			391	22	373	1194;1195;1196;1197;1198;1199	1529;1530;1531;1532;1533;1534	1530
HSPGVITSLGEHILTPDSSLTK	Unmodified	2288.2012	0.20122559	29	G3MYP5	yes	yes	0	0	0	0		1		45.73	45.73	3	2.0142E-06	1	6023	20140904-PurClathDigest-1ug-02	106.86	101.61	40934000	0	40934000	0			392	29	374	1200	1535	1535
HSQGINWYHWK	Unmodified	1454.6844	0.68436695	9	E1BKN2	yes	yes	0	0	0	0			1	41.71	41.71	3	0.0008313	1	4765	20140904-PurClathDigest-1ug-03	105.46	101.12	3496300	0	0	3496300			393	9	375	1201	1536	1536
HSSLAGCQIINYR	Unmodified	1460.7194	0.71943182	38	P49951;F1MPU0	yes	no	0	0	0	0		1	1	43.463	43.463	2	8.277E-19	2	5195	20140904-PurClathDigest-1ug-03	243.4	220.9	9892300	0	4877900	5014400			394	38	376	1202;1203	1537;1538	1538
HWPFMVVNDAGRPK	Oxidation (M)	1668.8195	0.81948022	36	P19120	yes	yes	0	0	1	1	1	1	1	41.568	41.568	3	0.00056523	3	4959	20140904-PurClathDigest-1ug-02	117.95	107.5	67225000	37026000	13575000	16623000			395	36	377	1204;1205;1206	1539;1540;1541	1540		129
IAALQSFADQLIAGGHYAK	Unmodified	1973.0371	0.037060793	7	E1BFB0	yes	yes	0	0	0	0	1	2	2	51.92	51.92	2;3	6.1916E-05	5	7532	20140904-PurClathDigest-1ug-02	97.095	92.874	89953000	43856000	27136000	18961000			396	7	378	1207;1208;1209;1210;1211	1542;1543;1544;1545;1546	1543
IAAYLFK	Unmodified	824.47963	0.47962569	38	P49951;F1MPU0	yes	no	0	0	0	0	1	1	1	44.137	44.137	2	0.029443	6	5587	20140904-PurClathDigest-1ug-02	88.734	26.737	1536400000	725770000	346140000	464480000			397	38	379	1212;1213;1214	1547;1548;1549;1550;1551;1552	1549
IAEAPASEAVAAPK	Unmodified	1323.7034	0.70343063	13	F1MEW3	yes	yes	0	0	0	0	1	1	1	36.337	36.337	2	0.00033073	3	4056	20140904-PurClathDigest-1ug-01	112.42	89.305	125860000	70694000	34295000	20872000			398	13	380	1215;1216;1217	1553;1554;1555	1553
IAFIMDESNVLDSGFLER	Oxidation (M)	2070.9932	0.99320665	6	E1BDX8	yes	yes	0	0	1	0		1	1	53.059	53.059	2	1.2292E-07	2	7523	20140904-PurClathDigest-1ug-03	143.28	136.95	10598000	0	6267600	4330200			399	6	381	1218;1219	1556;1557	1557		21
IATQELFEEK	Unmodified	1206.6132	0.61321864	13	F1MEW3	yes	yes	0	0	0	0	1			42.493	42.493	2	0.0041354	1	5675	20140904-PurClathDigest-1ug-01	106.62	76.851	100740000	100740000	0	0			400	13	382	1220	1558	1558
IDLSHVTSK	Unmodified	998.53966	0.53965977	13	F1MEW3	yes	yes	0	0	0	0	2			36.953	36.953	2;3	0.00041636	2	4266	20140904-PurClathDigest-1ug-01	154.81	93.211	16952000	16952000	0	0			401	13	383	1221;1222	1559;1560	1560
IDSLMDEIAFLK	Oxidation (M)	1409.7112	0.71121813	32	P02548	yes	yes	0	0	1	0	1	1	1	51.331	51.331	2	0.0071121	5	7355	20140904-PurClathDigest-1ug-02	110.31	73.889	115770000	47291000	35057000	33420000			402	32	384	1223;1224;1225	1561;1562;1563;1564;1565	1562		117
IDSLMDEIAFLKK	Oxidation (M)	1537.8062	0.80618115	32	P02548	yes	yes	0	0	1	1	1	1	1	47.901	47.901	3	2.8662E-05	4	6560	20140904-PurClathDigest-1ug-02	142.83	136.14	45281000	24939000	10786000	9554800			403	32	385	1226;1227;1228	1566;1567;1568;1569	1567		117
IDSVLLTHIGADNLPGINGLLQR	Deamidation (NQ)	2429.3278	0.32782309	29;24	F1N3M8;G3MYP5	no	no	0	1	0	0		1		51.822	51.822	2	0.010237	1	7519	20140904-PurClathDigest-1ug-02	93.776	93.447	4845700	0	4845700	0			404	24;29	386	1229	1570	1570	10
IEISELNR	Unmodified	972.52401	0.52400971	1;4	CON__P04264;CON__P35908	no	no	0	0	0	0	1	1	1	40.396	40.396	2	0.00014791	3	4690	20140904-PurClathDigest-1ug-02	193.28	72.819	52563000	27462000	13677000	11424000		+	405	1;4	387	1230;1231;1232	1571;1572;1573	1572
IFTIESTR	Unmodified	965.5182	0.51819605	6	E1BDX8	yes	yes	0	0	0	0		1		41.712	41.712	2	0.0097078	1	5000	20140904-PurClathDigest-1ug-02	96.027	22.819	2359800	0	2359800	0			406	6	388	1233	1574	1574
IGFGPSPFLLPEGLPK	Unmodified	1667.9287	0.92867954	19	F1MSQ6	yes	yes	0	0	0	0	1	1	1	54.742	54.742	2	8.3969E-05	3	7920	20140904-PurClathDigest-1ug-03	106.82	99.603	194710000	107880000	39041000	47791000			407	19	389	1234;1235;1236	1575;1576;1577	1577
IGSTDNIK	Unmodified	846.4447	0.44469675	13	F1MEW3	yes	yes	0	0	0	0	1	1	1	32.391	32.391	2	0.0017231	3	3049	20140904-PurClathDigest-1ug-01	123.98	58.731	40524000	22237000	10043000	8243600			408	13	390	1237;1238;1239	1578;1579;1580	1578
IHEGCEEPATHNALAK	Unmodified	1718.8046	0.80461802	38	P49951;F1MPU0	yes	no	0	0	0	0	1	1	1	34.202	34.202	3	2.051E-05	3	3037	20140904-PurClathDigest-1ug-03	115.63	110.87	161550000	99523000	31096000	30931000			409	38	391	1240;1241;1242	1581;1582;1583	1583
IIAPPER	Unmodified	794.46504	0.46503826	39	P63258;P60712;F1MRD0	no	no	0	0	0	0		1	1	35.17	35.17	2	0.0085838	2	3253	20140904-PurClathDigest-1ug-03	107.32	59.574	8152700	0	4697200	3455500			410	39	392	1243;1244	1584;1585	1585
IIAPPERK	Unmodified	922.56	0.56000128	39	P63258;P60712;F1MRD0	no	no	0	0	0	1	1	1	1	32.56	32.56	3	0.0055808	3	2685	20140904-PurClathDigest-1ug-03	101.41	72.263	11330000	7323300	2078400	1928200			411	39	393	1245;1246;1247	1586;1587;1588	1588
IINEPTAAAIAYGLDKK	Unmodified	1786.9829	0.98289996	36	P19120	no	no	0	0	0	1	2	2	1	45.17	45.17	2;3	0.0002313	5	5652	20140904-PurClathDigest-1ug-03	98.062	97.373	94692000	52433000	24431000	17828000			412	36	394	1248;1249;1250;1251;1252	1589;1590;1591;1592;1593	1593
IINEPTAAAIAYGLDR	Unmodified	1686.8941	0.89408495	42	Q27975;Q27965	no	no	0	0	0	0	1	1	1	48.38	48.38	2	1.635E-06	3	6695	20140904-PurClathDigest-1ug-02	123.02	94.74	18948000	9167000	5627900	4152600			413	42	395	1253;1254;1255	1594;1595;1596	1595
IKEWYEK	Unmodified	994.51238	0.51238239	2	CON__P13645;P06394;A6QNZ7;CON__P02535-1;F1MFW9	yes	no	0	0	0	1	2	2	2	37.76	37.76	2;3	0.0040344	6	4037	20140904-PurClathDigest-1ug-02	118.32	56.742	82679000	46276000	23202000	13202000		+	414	2	396	1256;1257;1258;1259;1260;1261	1597;1598;1599;1600;1601;1602	1599
IKFEMEQNLR	Oxidation (M)	1322.6653	0.66527099	3	CON__P35527	yes	yes	0	0	1	1	2	2	2	37.413	37.413	2;3	0.0011135	6	3957	20140904-PurClathDigest-1ug-02	115.57	91.85	34595000	19738000	8582400	6274100		+	415	3	397	1262;1263;1264;1265;1266;1267	1603;1604;1605;1606;1607;1608	1606		8
IKGEELSEANVR	Unmodified	1343.7045	0.70449327	16	F1MIC9	yes	yes	0	0	0	1	1		1	34.956	34.956	2	0.00010784	2	3244	20140904-PurClathDigest-1ug-03	142.12	126.97	9821700	6550500	0	3271200			416	16	398	1268;1269	1609;1610	1610
ILADLEDYLNELWEDKEGK	Unmodified	2292.1162	0.11615855	48	Q3SYW6	yes	yes	0	0	0	1	1	1		56.659	56.659	3	2.659E-09	2	8574	20140904-PurClathDigest-1ug-02	173.37	172.27	3022100	2021000	1001100	0			417	48	399	1270;1271	1611;1612	1612
ILDDDTIITTLENLKR	Unmodified	1872.0204	0.020407676	6	E1BDX8	yes	yes	0	0	0	1	1	1	1	53.192	53.192	3	1.6741E-05	3	7580	20140904-PurClathDigest-1ug-03	126.25	109.5	25681000	14112000	6473900	5095300			418	6	400	1272;1273;1274	1613;1614;1615	1615
ILEDNSVPQVK	Unmodified	1240.6663	0.66631685	35	P11966	yes	yes	0	0	0	0		1		39.016	39.016	2	0.0092441	1	4335	20140904-PurClathDigest-1ug-02	87.184	54.096	4238300	0	4238300	0			419	35	401	1275	1616	1616
ILEGLEK	Unmodified	800.46437	0.46436956	29;24	F1N3M8;G3MYP5	no	no	0	0	0	0	1	1	1	39.34	39.34	2	0.033343	3	4777	20140904-PurClathDigest-1ug-01	87.323	6.0259	49197000	25222000	17173000	6801700			420	24;29	402	1276;1277;1278	1617;1618;1619	1617
ILIPEGTR	Unmodified	897.52837	0.5283668	25	F1N690	yes	yes	0	0	0	0	1	1	1	39.744	39.744	2	0.0010804	3	4515	20140904-PurClathDigest-1ug-02	131.03	76.826	14589000	8499200	3707400	2382000			421	25	403	1279;1280;1281	1620;1621;1622	1621
ILSSTTSK	Unmodified	835.4651	0.46509784	40	Q08DH7	yes	yes	0	0	0	0	1	1	1	31.391	31.391	2	0.0086371	3	2808	20140904-PurClathDigest-1ug-01	102.51	45.336	72355000	44838000	15729000	11788000			422	40	404	1282;1283;1284	1623;1624;1625	1623
IMEGPAFNFLDAPAVR	Oxidation (M)	1762.8712	0.87124102	35	P11966	yes	yes	0	0	1	0	1	1		50.803	50.803	2	0.00010987	2	7310	20140904-PurClathDigest-1ug-02	136.81	126.2	12588000	8790500	3797900	0			423	35	405	1285;1286	1626;1627	1627		126
IMNTFSVVPSPK	Oxidation (M)	1334.6904	0.69042311	47;45;49;46	Q2KJD0;E1B953;Q3MHM5;Q2T9S0;Q3ZBU7	no	no	0	0	1	0		1	1	42.431	42.431	2	0.0073389	2	5160	20140904-PurClathDigest-1ug-02	113.24	69.737	16324000	0	11963000	4360300			424	45;47;46;49	406	1287;1288	1628;1629	1628		180
INAVVETGR	Unmodified	957.52434	0.52434406	20	F1MYC9	yes	yes	0	0	0	0		1	1	34.931	34.931	2	0.037366	2	3374	20140904-PurClathDigest-1ug-02	83.358	24.205	1353800	0	672190	681600			425	20	407	1289;1290	1630;1631	1630
INEWLTLVEK	Unmodified	1243.6812	0.68123863	6	E1BDX8	yes	yes	0	0	0	0	1			50.47	50.47	2	0.0086816	1	7822	20140904-PurClathDigest-1ug-01	84.309	75.558	3246300	3246300	0	0			426	6	408	1291	1632	1632
INVYYNEAAGNK	Unmodified	1354.6517	0.65172941	8	E1BJB1;G3X7R7	yes	no	0	0	0	0	1	1	1	38.953	38.953	2	0.00015845	3	4137	20140904-PurClathDigest-1ug-03	113.61	82.115	57489000	33455000	15395000	8639600			427	8	409	1292;1293;1294	1633;1634;1635	1635
INVYYNEATGGK	Unmodified	1327.6408	0.64083038	47	Q3MHM5	yes	yes	0	0	0	0	1	1	1	39.641	39.641	2	3.5172E-05	3	4877	20140904-PurClathDigest-1ug-01	138.45	117.05	15243000	8127400	3800900	3314400			428	47	410	1295;1296;1297	1636;1637;1638	1636
INVYYNEATGGNYVPR	Unmodified	1828.8744	0.87441214	49	Q3ZBU7	yes	yes	0	0	0	0	1		1	43.414	43.414	2	5.9979E-09	2	5893	20140904-PurClathDigest-1ug-01	156.17	143.28	30244000	23238000	0	7006300			429	49	411	1298;1299	1639;1640	1639
IPSVSTHIK	Unmodified	980.56548	0.56548059	19	F1MSQ6	yes	yes	0	0	0	0	1	1	1	35.356	35.356	2	0.013822	3	3785	20140904-PurClathDigest-1ug-01	90.696	35.326	81858000	41703000	19900000	20254000			430	19	412	1300;1301;1302	1641;1642;1643	1641
IQDWYDKK	Unmodified	1094.5397	0.53965977	3	CON__P35527	yes	yes	0	0	0	1	2	2	2	37.358	37.358	2;3	0.0057744	6	3755	20140904-PurClathDigest-1ug-03	133.33	106.64	34189000	21970000	7389600	4830200		+	431	3	413	1303;1304;1305;1306;1307;1308	1644;1645;1646;1647;1648;1649	1648
IQGLTGEQAEAVVR	Unmodified	1469.7838	0.78380622	6	E1BDX8	yes	yes	0	0	0	0	1	1	1	40.838	40.838	2	1.7551E-10	3	5197	20140904-PurClathDigest-1ug-01	184.98	120.86	18979000	9230600	6001800	3746200			432	6	414	1309;1310;1311	1650;1651;1652	1650
IREEYPDR	Unmodified	1076.5251	0.52507234	47;8;45	Q2KJD0;Q3MHM5;G3X7R8;Q2HJ81;E1BJB1;Q6B856;G3X7R7;G3N1W7;E1BJK2;CON__ENSEMBL:ENSBTAP00000025008	no	no	0	0	0	1	2	2	2	32.533	32.533	2;3	0.000241	6	2677	20140904-PurClathDigest-1ug-03	135	102.68	36665000	21840000	8395000	6429800			433	45;47;8	415	1312;1313;1314;1315;1316;1317	1653;1654;1655;1656;1657;1658	1658
IRLENEIQTYR	Unmodified	1433.7627	0.76267685	2	CON__P13645;P06394;A6QNZ7	yes	no	0	0	0	1	2	2	2	40.431	40.431	2;3	3.1916E-44	6	5050	20140904-PurClathDigest-1ug-01	266.69	208.56	48316000	12589000	18811000	16916000		+	434	2	416	1318;1319;1320;1321;1322;1323	1659;1660;1661;1662;1663;1664	1660
ISDFGQMASGLHVDAGEAAELK	Oxidation (M)	2261.0634	0.063411478	13	F1MEW3	yes	yes	0	0	1	0	1	2	2	43.517	43.517	2;3	4.926E-05	5	5435	20140904-PurClathDigest-1ug-02	96.016	92.778	107720000	58375000	26931000	22413000			435	13	417	1324;1325;1326;1327;1328	1665;1666;1667;1668;1669	1666		58
ISEQFTAMFR	Oxidation (M)	1244.586	0.58595803	47;8;45;49;46	Q2KJD0;Q3MHM5;E1BJB1;Q6B856;Q2T9S0;Q3ZBU7	no	no	0	0	1	0	1	1	1	43.477	43.477	2	0.00030753	4	5438	20140904-PurClathDigest-1ug-02	147.78	94.75	66079000	34467000	16692000	14920000			436	45;47;8;46;49	418	1329;1330;1331	1670;1671;1672;1673	1672		45
ISGETIFVTAPHEATAGIIGVNR	Unmodified	2352.2438	0.24375911	38	P49951;F1MPU0	yes	no	0	0	0	0	5	2	3	50.236	50.236	2;3	2.2579E-20	50	6860	20140904-PurClathDigest-1ug-01	177.08	176.48	6927600000	3656200000	1635600000	1635800000			437	38	419	1332;1333;1334;1335;1336;1337;1338;1339;1340;1341	1674;1675;1676;1677;1678;1679;1680;1681;1682;1683;1684;1685;1686;1687;1688;1689;1690;1691;1692;1693;1694;1695;1696;1697;1698;1699;1700;1701;1702;1703;1704;1705;1706;1707;1708;1709;1710;1711;1712;1713;1714;1715;1716;1717;1718;1719;1720;1721;1722;1723	1680
ISGETIFVTAPHEATAGIIGVNRK	Unmodified	2480.3387	0.33872212	38	P49951;F1MPU0	yes	no	0	0	0	1	3	2	2	45.112	45.112	2;3;4	4.316E-05	14	6336	20140904-PurClathDigest-1ug-01	98.3	98.131	3133000000	1723200000	809140000	600680000			438	38	420	1342;1343;1344;1345;1346;1347;1348	1724;1725;1726;1727;1728;1729;1730;1731;1732;1733;1734;1735;1736;1737	1728
ISGETIFVTAPHEATAGIIGVNRK	Deamidation (NQ)	2481.3227	0.32273771	38	P49951;F1MPU0	yes	no	0	1	0	1	1	1	1	45.623	45.623	3	0.00071002	3	6451	20140904-PurClathDigest-1ug-01	115.54	114.78	106490000	54322000	30021000	22143000			439	38	420	1349;1350;1351	1738;1739;1740	1738	24
ISGSPSSGFR	Unmodified	993.48796	0.48795855	12	F1MDZ2;O77788	yes	no	0	0	0	0		1	1	35.681	35.681	2	9.6416E-10	2	3344	20140904-PurClathDigest-1ug-03	129.85	88.403	28998000	0	28998000	0			440	12	421	1352;1353	1741;1742	1742
ISKLEEK	Unmodified	845.48583	0.48583328	29;24	F1N3M8;G3MYP5	no	no	0	0	0	1	1			30.771	30.771	2	0.0028379	1	2676	20140904-PurClathDigest-1ug-01	144.12	17.6	5078400	5078400	0	0			441	24;29	422	1354	1743	1743
ISKPDLKPFTPEVR	Unmodified	1625.9141	0.91409211	29;24	F1N3M8;G3MYP5	no	no	0	0	0	2	2	2	2	40.288	40.288	3;4	0.003619	6	4671	20140904-PurClathDigest-1ug-02	102.12	94.145	66060000	36394000	17888000	11778000			442	24;29	423	1355;1356;1357;1358;1359;1360	1744;1745;1746;1747;1748;1749	1747
ISVNDFIIK	Unmodified	1047.5964	0.59644637	25	F1N690	yes	yes	0	0	0	0	1	1	1	49.215	49.215	2	0.0044287	3	6879	20140904-PurClathDigest-1ug-02	109.66	45.01	12357000	6603100	2764500	2989200			443	25	424	1361;1362;1363	1750;1751;1752	1751
ISVYYNEASSHK	Unmodified	1396.6623	0.6622941	46	Q2T9S0	yes	yes	0	0	0	0			1	36.625	36.625	3	0.0037269	1	3590	20140904-PurClathDigest-1ug-03	82.505	78.628	2823700	0	0	2823700			444	46	425	1364	1753	1753
ISVYYNEATGGK	Unmodified	1300.6299	0.62993134	45	Q2KJD0;E1B953	yes	no	0	0	0	0	1	1	1	39.522	39.522	2	4.7687E-06	3	4479	20140904-PurClathDigest-1ug-02	142.47	111.65	10951000	5785100	3322900	1842600			445	45	426	1365;1366;1367	1754;1755;1756	1755
ITALDEFATK	Unmodified	1107.5812	0.58119023	7	E1BFB0	yes	yes	0	0	0	0	1	1		44.195	44.195	2	0.00039312	3	6124	20140904-PurClathDigest-1ug-01	121.9	36.544	13138000	8177000	4960900	0			446	7	427	1368;1369	1757;1758;1759	1757
ITFTPSSGIASEVTVPK	Unmodified	1732.9247	0.92471638	9	E1BKN2	yes	yes	0	0	0	0	1	1	1	46.008	46.008	2	0.00028974	3	5841	20140904-PurClathDigest-1ug-03	100.04	90.763	170810000	99449000	36970000	34390000			447	9	428	1370;1371;1372	1760;1761;1762	1762
ITIPVQTFSNLQIR	Unmodified	1628.925	0.92499115	43	Q28115	yes	yes	0	0	0	0	1	1	1	50.235	50.235	2	3.8321E-10	3	7673	20140904-PurClathDigest-1ug-01	170.66	169.25	245070000	114570000	51772000	78728000			448	43	429	1373;1374;1375	1763;1764;1765	1763
ITITNDK	Unmodified	803.43888	0.43888309	36;42	Q27975;Q27965;P0CB32;P19120	no	no	0	0	0	0	1	1	1	33.633	33.633	2	0.004044	3	3356	20140904-PurClathDigest-1ug-01	145.04	31.022	13782000	7875000	3100400	2806600			449	42;36	430	1376;1377;1378	1766;1767;1768	1766
IVLDNSVFSEHR	Unmodified	1414.7205	0.72047768	38	P49951;F1MPU0	yes	no	0	0	0	0	3	4	4	42.617	42.617	2;3	2.8301E-13	34	5072	20140904-PurClathDigest-1ug-03	243.13	150.04	4881700000	2362200000	1538400000	981010000			450	38	431	1379;1380;1381;1382;1383;1384;1385;1386;1387;1388;1389	1769;1770;1771;1772;1773;1774;1775;1776;1777;1778;1779;1780;1781;1782;1783;1784;1785;1786;1787;1788;1789;1790;1791;1792;1793;1794;1795;1796;1797;1798;1799;1800;1801;1802	1801
IVLDNSVFSEHR	Deamidation (NQ)	1415.7045	0.70449327	38	P49951;F1MPU0	yes	no	0	1	0	0	2	3	2	43.833	43.833	2;3	1.4087E-12	11	5362	20140904-PurClathDigest-1ug-02	257.42	175	584740000	238160000	246180000	100400000			451	38	431	1390;1391;1392;1393;1394;1395;1396	1803;1804;1805;1806;1807;1808;1809;1810;1811;1812;1813	1806	25
IVQVVTAEAVAVLKGEQEK	Unmodified	2010.1361	0.13610614	13	F1MEW3	yes	yes	0	0	0	1	2	2	2	48.036	48.036	2;3	1.1451E-09	6	6349	20140904-PurClathDigest-1ug-03	173.98	163.99	138770000	67223000	38065000	33481000			452	13	432	1397;1398;1399;1400;1401;1402	1814;1815;1816;1817;1818;1819	1819
IVSSNDVGHDEYSTQSLVK	Unmodified	2076.9964	0.99637777	20	F1MYC9	yes	yes	0	0	0	0	1			38.918	38.918	2	4.4854E-08	1	4780	20140904-PurClathDigest-1ug-01	119.62	109	5379800	5379800	0	0			453	20	433	1403	1820	1820
IWHHTFYNELR	Unmodified	1514.7419	0.74188183	39	P63258;P60712;F1MRD0	no	no	0	0	0	0	2	2	1	40.057	40.057	2;3	2.8071E-07	5	4957	20140904-PurClathDigest-1ug-01	107.03	85.966	59429000	32212000	16486000	10732000			454	39	434	1404;1405;1406;1407;1408	1821;1822;1823;1824;1825	1822
IWNVHSVLNVLHSLVDK	Unmodified	1972.0894	0.089430715	51	Q3ZCK1	yes	yes	0	0	0	0	1			56.316	56.316	3	2.9205E-08	1	9268	20140904-PurClathDigest-1ug-01	123.63	122.01	1467300	1467300	0	0			455	51	435	1409	1826	1826
IYIDSNNNPER	Unmodified	1333.6262	0.62624295	38	P49951;F1MPU0	yes	no	0	0	0	0	1	3	4	36.654	36.654	2	9.0646E-25	10	3770	20140904-PurClathDigest-1ug-02	188.28	174.27	1323800000	1323800000	0	0			456	38	436	1410;1411;1412;1413;1414;1415;1416;1417	1827;1828;1829;1830;1831;1832;1833;1834;1835;1836	1830
IYIDSNNNPER	Deamidation (NQ)	1334.6103	0.61025853	38	P49951;F1MPU0	yes	no	0	1	0	0	1	1	1	37.362	37.362	2	9.8078E-06	9	4360	20140904-PurClathDigest-1ug-01	180.07	148.39	1003200000	583880000	259990000	159340000			457	38	436	1418;1419;1420	1837;1838;1839;1840;1841;1842;1843;1844;1845	1838	26;27
KAEEEKAPAIPK	Unmodified	1309.7242	0.72416608	19	F1MSQ6	yes	yes	0	0	0	2	2	2	1	32.51	32.51	2;3	5.5787E-05	5	3068	20140904-PurClathDigest-1ug-01	152.23	146.61	84718000	55164000	18734000	10819000			458	19	437	1421;1422;1423;1424;1425	1846;1847;1848;1849;1850	1846
KAEEEREGEVGVPDHSPR	Unmodified	2019.961	0.96099532	29	G3MYP5	yes	yes	0	0	0	2	2	2	2	32.375	32.375	3;4	5.6425E-06	6	2651	20140904-PurClathDigest-1ug-03	145.48	143.97	53812000	34169000	11453000	8189700			459	29	438	1426;1427;1428;1429;1430;1431	1851;1852;1853;1854;1855;1856	1856
KAEPELDLAVK	Unmodified	1211.6762	0.67615325	13	F1MEW3	yes	yes	0	0	0	1	1	1	1	39.763	39.763	2	2.2576E-05	6	4846	20140904-PurClathDigest-1ug-01	166.7	104.75	56285000	27403000	18842000	10041000			460	13	439	1432;1433;1434	1857;1858;1859;1860;1861;1862	1857
KAEQGQLDIK	Unmodified	1128.6139	0.61388734	13	F1MEW3	yes	yes	0	0	0	1	1	1	1	33.565	33.565	2	0.00031338	3	2888	20140904-PurClathDigest-1ug-03	188.27	115.68	157880000	107550000	25660000	24672000			461	13	440	1435;1436;1437	1863;1864;1865	1865
KASDKLDTVLEK	Unmodified	1345.7453	0.74529545	13	F1MEW3	yes	yes	0	0	0	2	2	2	2	36.497	36.497	2;3	7.6916E-07	6	3566	20140904-PurClathDigest-1ug-03	171.54	139.06	50388000	27094000	12008000	11285000			462	13	441	1438;1439;1440;1441;1442;1443	1866;1867;1868;1869;1870;1871	1870
KAVDVFFPPEAQNDFPVAMQISEK	Oxidation (M)	2722.3313	0.33125348	38	P49951;F1MPU0	yes	no	0	0	1	1	1	2	1	49.324	49.324	2;3	0.026287	10	7408	20140904-PurClathDigest-1ug-01	58.272	58.063	2114500000	942840000	652810000	518850000			463	38	442	1444;1445;1446;1447	1872;1873;1874;1875;1876;1877;1878;1879;1880;1881	1872		150
KAVDVFFPPEAQNDFPVAMQISEK	Unmodified	2706.3363	0.33633886	38	P49951;F1MPU0	yes	no	0	0	0	1	2	1	2	51.254	51.254	2;3	0.0022042	11	7985	20140904-PurClathDigest-1ug-01	81.974	81.265	479930000	189930000	112840000	177160000			464	38	442	1448;1449;1450;1451;1452	1882;1883;1884;1885;1886;1887;1888;1889;1890;1891;1892	1884
KDEDLEPK	Unmodified	972.47639	0.47639081	29;24	F1N3M8;G3MYP5	no	no	0	0	0	1		1		31.338	31.338	2	0.015183	1	2557	20140904-PurClathDigest-1ug-02	80.676	42.516	2298100	0	2298100	0			465	24;29	443	1453	1893	1893
KDEVLEEK	Unmodified	988.50769	0.50769094	29;24	F1N3M8;G3MYP5	no	no	0	0	0	1	1		1	31.927	31.927	2	0.0017803	2	2941	20140904-PurClathDigest-1ug-01	188.3	56.891	6128900	4616200	0	1512700			466	24;29	444	1454;1455	1894;1895	1894
KDEVLEEKDK	Unmodified	1231.6296	0.62959699	29;24	F1N3M8;G3MYP5	no	no	0	0	0	2	2	2	2	30.857	30.857	2;3	2.9245E-05	6	2299	20140904-PurClathDigest-1ug-03	199.8	116.97	52492000	26293000	12765000	13434000			467	24;29	445	1456;1457;1458;1459;1460;1461	1896;1897;1898;1899;1900;1901	1900
KDEWGLVAPVSPGPLTPMK	Oxidation (M)	2037.0605	0.060498352	13	F1MEW3	yes	yes	0	0	1	1		2	2	46.249	46.249	2;3	0.0061436	4	6168	20140904-PurClathDigest-1ug-02	86.539	85.313	80916000	0	52722000	28194000			468	13	446	1462;1463;1464;1465	1902;1903;1904;1905	1903		59
KDEWGLVAPVSPGPLTPMKEK	Oxidation (M)	2294.1981	0.19805447	13	F1MEW3	yes	yes	0	0	1	2	1	1	1	44.209	44.209	3	0.02776	3	6077	20140904-PurClathDigest-1ug-01	90.758	89.794	53423000	36625000	9527400	7271000			469	13	447	1466;1467;1468	1906;1907;1908	1906		59
KDIEESSLVK	Unmodified	1146.6132	0.61321864	12	F1MDZ2;O77788	yes	no	0	0	0	1	1	1	1	35.183	35.183	2	0.00032602	3	3454	20140904-PurClathDigest-1ug-02	171.09	150.31	10006000	5894400	1889500	2221800			470	12	448	1469;1470;1471	1909;1910;1911	1910
KDLEEWNQR	Unmodified	1216.5836	0.58364985	30	P04975;G3N252	yes	no	0	0	0	1	2	2	2	37.058	37.058	2;3	3.9003E-15	9	4264	20140904-PurClathDigest-1ug-01	266.91	190.81	307750000	147020000	93917000	66815000			471	30	449	1472;1473;1474;1475;1476;1477	1912;1913;1914;1915;1916;1917;1918;1919;1920	1913
KDLYANTVLSGGTTMYPGIADR	Oxidation (M)	2358.1526	0.15256084	39	P63258;P60712	yes	no	0	0	1	1	2	2	2	44.134	44.134	2;3	2.3625E-06	6	5388	20140904-PurClathDigest-1ug-03	118.37	117.18	108120000	62983000	18071000	27065000			472	39	450	1478;1479;1480;1481;1482;1483	1921;1922;1923;1924;1925;1926	1925		166
KDPELWGSVLLESNPYR	Unmodified	2002.016	0.015991	38	P49951	yes	yes	0	0	0	1	2	2	2	50.634	50.634	2;3	1.2096E-12	11	6963	20140904-PurClathDigest-1ug-03	207.56	204.02	1759100000	798550000	540050000	420460000			473	38	451	1484;1485;1486;1487;1488;1489	1927;1928;1929;1930;1931;1932;1933;1934;1935;1936;1937	1936
KDSLYK	Unmodified	752.40685	0.40685468	38	P49951;F1MPU0	yes	no	0	0	0	1	1	1	1	31.232	31.232	2	0.057002	3	2368	20140904-PurClathDigest-1ug-03	119.07	25.066	179640000	96921000	47765000	34956000			474	38	452	1490;1491;1492	1938;1939;1940	1940
KDTKPEVK	Unmodified	943.53385	0.53384611	29;24	F1N3M8;G3MYP5	no	no	0	0	0	2	1			20.917	20.917	3	0.050861	1	1652	20140904-PurClathDigest-1ug-01	77.318	64.281	114560	114560	0	0			475	24;29	453	1493	1941	1941
KEAPKPEEK	Unmodified	1054.5659	0.56587452	19	F1MSQ6	yes	yes	0	0	0	2	1			20.864	20.864	3	0.060315	1	1646	20140904-PurClathDigest-1ug-01	60.717	48.481	215960	215960	0	0			476	19	454	1494	1942	1942
KEDIAINGEVEGKEEEQETK	Unmodified	2274.0863	0.08631499	12	F1MDZ2;O77788	yes	no	0	0	0	2	1			35.905	35.905	3	4.1337E-10	1	3966	20140904-PurClathDigest-1ug-01	172.24	169.95	4752000	4752000	0	0			477	12	455	1495	1943	1943
KEDIAINGEVEGKEEEQETK	Deamidation (NQ)	2275.0703	0.070330574	12	F1MDZ2;O77788	yes	no	0	1	0	2	6	5	5	37.147	37.147	2;3;4	3.6191E-28	19	3798	20140904-PurClathDigest-1ug-03	298.96	282.56	527180000	316380000	112920000	97884000			478	12	455	1496;1497;1498;1499;1500;1501;1502;1503;1504;1505;1506;1507;1508;1509;1510;1511	1944;1945;1946;1947;1948;1949;1950;1951;1952;1953;1954;1955;1956;1957;1958;1959;1960;1961;1962	1960	5
KEETPAAPEKK	Unmodified	1226.6507	0.65066678	19	F1MSQ6	yes	yes	0	0	0	2	1	2	1	30.289	30.289	2;3	0.001044	4	2162	20140904-PurClathDigest-1ug-03	117.86	79.865	66454000	37222000	19391000	9842200			479	19	456	1512;1513;1514;1515	1963;1964;1965;1966	1966
KEPDDAKPK	Unmodified	1026.5346	0.53457439	19	F1MSQ6	yes	yes	0	0	0	2	1			21.095	21.095	3	0.024576	1	1642	20140904-PurClathDigest-1ug-01	95.09	82.806	294780	294780	0	0			480	19	457	1516	1967	1967
KEPSTVSRDEVR	Unmodified	1401.7212	0.72120596	13	F1MEW3	yes	yes	0	0	0	2	1	1	1	30.861	30.861	3	0.00040318	3	2429	20140904-PurClathDigest-1ug-02	132.03	102.78	21451000	12340000	5624800	3486400			481	13	458	1517;1518;1519	1968;1969;1970	1969
KESKEETPEVTK	Unmodified	1403.7144	0.71438925	22	F1N1S2	yes	yes	0	0	0	2		1		30.476	30.476	2	5.2455E-18	1	2347	20140904-PurClathDigest-1ug-02	189.99	161.94	0	0	0	0			482	22	459	1520	1971	1971
KFDDFQK	Unmodified	926.44978	0.44978213	7	E1BFB0	yes	yes	0	0	0	1	1	1	1	35.253	35.253	2	0.01654	3	3293	20140904-PurClathDigest-1ug-03	161.12	133.38	9848100	4970500	2637600	2240000			483	7	460	1521;1522;1523	1972;1973;1974	1974
KFDVNTSAVQVLIEHIGNLDR	Deamidation (NQ)	2368.2387	0.23867373	38	P49951;F1MPU0	yes	no	0	1	0	1	5	3	2	54.945	54.945	2;3	7.6976E-36	24	7823	20140904-PurClathDigest-1ug-02	281.96	280.61	444540000	264180000	107170000	73193000			484	38	461	1524;1525;1526;1527;1528;1529;1530;1531;1532;1533	1975;1976;1977;1978;1979;1980;1981;1982;1983;1984;1985;1986;1987;1988;1989;1990;1991;1992;1993;1994;1995;1996;1997;1998	1986	28;29;63
KFDVNTSAVQVLIEHIGNLDR	Unmodified	2367.2547	0.25465814	38	P49951;F1MPU0	yes	no	0	0	0	1	4	5	5	55.899	55.899	2;3;4	1.3636E-66	35	8100	20140904-PurClathDigest-1ug-02	357.5	357.15	4824000000	2188300000	1413800000	1221900000			485	38	461	1534;1535;1536;1537;1538;1539;1540;1541;1542;1543;1544;1545;1546;1547	1999;2000;2001;2002;2003;2004;2005;2006;2007;2008;2009;2010;2011;2012;2013;2014;2015;2016;2017;2018;2019;2020;2021;2022;2023;2024;2025;2026;2027;2028;2029;2030;2031;2032;2033	2016
KFEEFQTDMAAHEER	Oxidation (M)	1882.8156	0.81557663	7	E1BFB0	yes	yes	0	0	1	1	2	1	1	35.958	35.958	2;3	0.00030875	4	3637	20140904-PurClathDigest-1ug-02	110.84	108.7	34211000	20231000	7383900	6596800			486	7	462	1548;1549;1550;1551	2034;2035;2036;2037	2036		33
KFLSDPQVHTVLVER	Unmodified	1766.9679	0.9679186	6	E1BDX8	yes	yes	0	0	0	1	1			40.326	40.326	3	1.7387E-08	1	5133	20140904-PurClathDigest-1ug-01	156	150.04	9018000	9018000	0	0			487	6	463	1552	2038	2038
KFNALFAQGNYSEAAK	Unmodified	1757.8737	0.87368386	38	P49951;F1MPU0	yes	no	0	0	0	1	3	2	3	47.016	47.016	2;3	1.8517E-21	26	4888	20140904-PurClathDigest-1ug-03	236.78	228.44	4999700000	2638900000	1387900000	972940000			488	38	464	1553;1554;1555;1556;1557;1558;1559;1560	2039;2040;2041;2042;2043;2044;2045;2046;2047;2048;2049;2050;2051;2052;2053;2054;2055;2056;2057;2058;2059;2060;2061;2062;2063;2064	2057
KFNALFAQGNYSEAAK	Deamidation (NQ)	1758.8577	0.85769944	38	P49951;F1MPU0	yes	no	0	1	0	1	4	6	5	43.446	43.446	2;3	3.7948E-11	29	5346	20140904-PurClathDigest-1ug-02	199.65	191.05	1878500000	1105100000	427750000	345670000			489	38	464	1561;1562;1563;1564;1565;1566;1567;1568;1569;1570;1571;1572;1573;1574;1575	2065;2066;2067;2068;2069;2070;2071;2072;2073;2074;2075;2076;2077;2078;2079;2080;2081;2082;2083;2084;2085;2086;2087;2088;2089;2090;2091;2092;2093	2073	30;31;64
KGADEAALAR	Unmodified	1000.5302	0.53015772	32	P02548	yes	yes	0	0	0	1	1	1	1	31.784	31.784	2	4.1845E-05	4	2627	20140904-PurClathDigest-1ug-02	211.86	142.67	360870000	194480000	99800000	66590000			490	32	465	1576;1577;1578	2094;2095;2096;2097	2095
KGDILTLLNSTNKDWWK	Unmodified	2031.0789	0.078925608	7	E1BFB0	yes	yes	0	0	0	2			1	51.272	51.272	3	0.00030366	1	7118	20140904-PurClathDigest-1ug-03	107.98	106.12	3075300	0	0	3075300			491	7	466	1579	2098	2098
KGDLQWNAGEK	Unmodified	1244.6149	0.61494998	15	F1MGT4	yes	yes	0	0	0	1	1	1	1	36.479	36.479	2	2.0867E-17	3	3564	20140904-PurClathDigest-1ug-03	269.04	199.39	17631000	8121400	5251700	4258100			492	15	467	1580;1581;1582	2099;2100;2101	2101
KHEAFETDFTVHK	Unmodified	1587.7682	0.76815616	7	E1BFB0	yes	yes	0	0	0	1		1	1	37.236	37.236	3;4	0.00093511	2	3717	20140904-PurClathDigest-1ug-03	79.875	76.907	6438800	0	3648900	2789900			493	7	468	1583;1584	2102;2103	2103
KHEAIETDIAAYEER	Unmodified	1773.8533	0.85334235	20	F1MYC9	yes	yes	0	0	0	1	1	1		39.989	39.989	3	1.3231E-06	2	4623	20140904-PurClathDigest-1ug-02	140.96	133.05	14576000	10028000	4548300	0			494	20	469	1585;1586	2104;2105	2105
KHQALQAEIAGHEPR	Unmodified	1683.8805	0.88050057	7	E1BFB0	yes	yes	0	0	0	1	1		1	34.221	34.221	4	0.00051834	2	3084	20140904-PurClathDigest-1ug-03	82.578	79.82	14031000	11106000	0	2924900			495	7	470	1587;1588	2106;2107	2107
KIDLSHVTSK	Unmodified	1126.6346	0.63462279	13	F1MEW3	yes	yes	0	0	0	1	2	2	2	34.845	34.845	2;3	0.00091569	6	3650	20140904-PurClathDigest-1ug-01	156.02	97.425	126690000	71348000	28814000	26530000			496	13	471	1589;1590;1591;1592;1593;1594	2108;2109;2110;2111;2112;2113	2109
KIESLEEEIR	Unmodified	1244.6612	0.66123147	43	Q28115	yes	yes	0	0	0	1	2	2	2	40.012	40.012	2;3	0.00018476	6	4578	20140904-PurClathDigest-1ug-02	190.88	101.56	263120000	137440000	71831000	53854000			497	43	472	1595;1596;1597;1598;1599;1600	2114;2115;2116;2117;2118;2119	2116
KIHEEEVR	Unmodified	1038.5458	0.54580778	43	Q28115	yes	yes	0	0	0	1	2	2	2	30.411	30.411	2;3	0.0020378	6	2581	20140904-PurClathDigest-1ug-01	109.48	54.702	110490000	69992000	23419000	17076000			498	43	473	1601;1602;1603;1604;1605;1606	2120;2121;2122;2123;2124;2125	2120
KLAVNMVPFPR	Oxidation (M)	1286.7169	0.71691263	47;8;45;49;46	Q2KJD0;Q3MHM5;G3X7R8;Q2HJ81;E1BJB1;Q6B856;G3X7R7;G3N1W7;E1BJK2;CON__ENSEMBL:ENSBTAP00000025008;Q2T9S0;Q3ZBU7	no	no	0	0	1	1	2	1	2	41.042	41.042	2;3	0.0001063	5	5280	20140904-PurClathDigest-1ug-01	118.6	103.62	43444000	22398000	10330000	10717000			499	45;47;8;46;49	474	1607;1608;1609;1610;1611	2126;2127;2128;2129;2130	2127		46
KLDPAQSASR	Unmodified	1071.5673	0.5672715	7	E1BFB0	yes	yes	0	0	0	1	1	1	1	31.041	31.041	2	0.00071988	3	2476	20140904-PurClathDigest-1ug-02	163.84	92.147	18804000	10873000	4545200	3386300			500	7	475	1612;1613;1614	2131;2132;2133	2132
KLEHLITELVHQR	Unmodified	1614.9206	0.92057447	6	E1BDX8	yes	yes	0	0	0	1			1	42.536	42.536	3	6.672E-10	1	4956	20140904-PurClathDigest-1ug-03	201.48	196.72	4188500	0	0	4188500			501	6	476	1615	2134	2134
KLLEGEENR	Unmodified	1086.5669	0.56693715	43	Q28115	yes	yes	0	0	0	1	2	2	2	32.47	32.47	2;3	0.00058366	6	2682	20140904-PurClathDigest-1ug-03	109.44	64.071	199950000	121540000	41670000	36742000			502	43	477	1616;1617;1618;1619;1620;1621	2135;2136;2137;2138;2139;2140	2140
KLLEGEETR	Unmodified	1073.5717	0.57168818	12;32;40	P02548;F1MDZ2;O77788;Q08DH7	no	no	0	0	0	1	2	2	2	32.897	32.897	2;3	0.0017366	9	2891	20140904-PurClathDigest-1ug-02	171.5	88.336	451320000	259870000	106210000	85240000			503	32;12;40	478	1622;1623;1624;1625;1626;1627	2141;2142;2143;2144;2145;2146;2147;2148;2149	2144
KLNEILQAR	Unmodified	1083.64	0.64004252	48	Q3SYW6	yes	yes	0	0	0	1			1	37.978	37.978	2	0.00079223	1	3886	20140904-PurClathDigest-1ug-03	186.76	118.38	979850	0	0	979850			504	48	479	1628	2150	2150
KLPEELGRDQNTVETLQR	Unmodified	2125.1127	0.11274493	20	F1MYC9	yes	yes	0	0	0	2	1			39.026	39.026	3	0.0048247	1	4781	20140904-PurClathDigest-1ug-01	94.281	91.042	5100200	5100200	0	0			505	20	480	1629	2151	2151
KLVPLLLEDGGEAPAALEAALEEK	Unmodified	2475.3472	0.34722112	6	E1BDX8	yes	yes	0	0	0	1			1	53.926	53.926	3	0.056128	1	7698	20140904-PurClathDigest-1ug-03	29.855	29.598	3680900	0	0	3680900			506	6	481	1630	2152	2152
KMEEKAEEVAPK	Oxidation (M)	1403.6966	0.6966307	12	F1MDZ2;O77788	yes	no	0	0	1	2	1	1	1	30.447	30.447	3	2.7357E-05	3	2335	20140904-PurClathDigest-1ug-02	168.18	157.83	29890000	16049000	7291600	6549600			507	12	482	1631;1632;1633	2153;2154;2155	2154		52
KNNHHEENISSK	Unmodified	1435.6804	0.68040378	7	E1BFB0	yes	yes	0	0	0	1	1	1	1	20.987	20.987	3	2.4881E-05	3	1654	20140904-PurClathDigest-1ug-01	139.48	111.51	1263500	683500	318880	261130			508	7	483	1634;1635;1636	2156;2157;2158	2156
KNVESTLR	Unmodified	945.52434	0.52434406	23	F1N319;Q28021	yes	no	0	0	0	1		1		31.633	31.633	2	0.06038	1	2604	20140904-PurClathDigest-1ug-02	50.04	36.663	348690	0	348690	0			509	23	484	1637	2159	2159
KPGNNEGSGAPSPLSK	Unmodified	1538.7689	0.76888444	15	F1MGT4	yes	yes	0	0	0	1	1			32.471	32.471	2	4.3008E-07	1	3110	20140904-PurClathDigest-1ug-01	156.96	142.16	12831000	12831000	0	0			510	15	485	1638	2160	2160
KQEAEWK	Unmodified	917.46068	0.46068117	33	P04973	yes	yes	0	0	0	1	2	2	2	31.732	31.732	2;3	0.0038844	9	2626	20140904-PurClathDigest-1ug-02	104.45	90.29	895790000	476250000	242730000	176820000			511	33	486	1639;1640;1641;1642;1643;1644	2161;2162;2163;2164;2165;2166;2167;2168;2169	2166
KQEAEWKEK	Unmodified	1174.5982	0.59823728	33	P04973	yes	yes	0	0	0	2	2	2	2	30.803	30.803	2;3	0.00010754	6	2668	20140904-PurClathDigest-1ug-01	169.37	134.99	502820000	268980000	139460000	94376000			512	33	487	1645;1646;1647;1648;1649;1650	2170;2171;2172;2173;2174;2175	2170
KQEALVAR	Unmodified	913.53451	0.53451481	7	E1BFB0	yes	yes	0	0	0	1	1			31.403	31.403	2	0.0056127	1	2837	20140904-PurClathDigest-1ug-01	145.16	61.95	4045500	4045500	0	0			513	7	488	1651	2176	2176
KQLLEK	Unmodified	757.46979	0.46978929	38	P49951;F1MPU0	yes	no	0	0	0	1	1	1	1	31.548	31.548	2	0.042824	6	2650	20140904-PurClathDigest-1ug-02	154.09	16.915	944730000	534730000	272480000	137520000			514	38	489	1652;1653;1654	2177;2178;2179;2180;2181;2182	2178
KQNLLASK	Unmodified	900.53927	0.53926584	20	F1MYC9	yes	yes	0	0	0	1	1			31.932	31.932	2	0.017516	1	2953	20140904-PurClathDigest-1ug-01	67.081	31.759	3024600	3024600	0	0			515	20	490	1655	2183	2183
KSPTPVAEAK	Unmodified	1026.571	0.5709599	22	F1N1S2	yes	yes	0	0	0	1	1	1	1	30.592	30.592	2	0.0015639	3	2370	20140904-PurClathDigest-1ug-02	145.23	111.5	39444000	21350000	11026000	7067300			516	22	491	1656;1657;1658	2184;2185;2186	2185
KSVPSETVVEESSTGLPPVTDENHIIVK	Unmodified	2990.5448	0.54481131	13	F1MEW3	yes	yes	0	0	0	1	1	1	1	42.803	42.803	3	0.02694	3	5722	20140904-PurClathDigest-1ug-01	54.167	54.055	41777000	21863000	10046000	9868500			517	13	492	1659;1660;1661	2187;2188;2189	2187
KTDDVEDMSSQAGLTLDER	Oxidation (M)	2124.9481	0.94810695	22	F1N1S2	yes	yes	0	0	1	1	2	2	2	38.837	38.837	2;3	1.0016E-08	6	4288	20140904-PurClathDigest-1ug-02	149.33	147.82	83858000	50593000	18558000	14708000			518	22	493	1662;1663;1664;1665;1666;1667	2190;2191;2192;2193;2194;2195	2193		99
KTSQIGESFEEILEETVISTK	Unmodified	2367.2057	0.20570184	40	Q08DH7	yes	yes	0	0	0	1	1	1	1	55.211	55.211	2	2.0938E-12	4	8306	20140904-PurClathDigest-1ug-02	165.47	162.36	53476000	31055000	12965000	9455000			519	40	494	1668;1669;1670	2196;2197;2198;2199	2198
KTTAAGAESAQAPSVFK	Unmodified	1662.8577	0.85769944	13	F1MEW3	yes	yes	0	0	0	1	2	2	2	37.235	37.235	2;3	1.7356E-12	6	3726	20140904-PurClathDigest-1ug-03	201.14	197.16	116130000	75202000	27122000	13810000			520	13	495	1671;1672;1673;1674;1675;1676	2200;2201;2202;2203;2204;2205	2204
KVAELEEEQSQGSSSYSDWVK	Unmodified	2385.0972	0.097214027	29;24	F1N3M8;G3MYP5	no	no	0	0	0	1	1	2	2	42.292	42.292	2;3	4.3645E-21	5	4908	20140904-PurClathDigest-1ug-03	184.2	181.98	80850000	34498000	22750000	23602000			521	24;29	496	1677;1678;1679;1680;1681	2206;2207;2208;2209;2210	2210
KVEDLFLTFAK	Unmodified	1309.7282	0.72818882	7	E1BFB0	yes	yes	0	0	0	1	1	1	1	49.668	49.668	2	8.2421E-06	3	6763	20140904-PurClathDigest-1ug-03	181.44	122.96	31786000	18128000	6170600	7488200			522	7	497	1682;1683;1684	2211;2212;2213	2213
KVESLLDELAFVR	Unmodified	1517.8453	0.84534384	40	Q08DH7	yes	yes	0	0	0	1	2	2	2	52.177	52.177	2;3	1.0891E-12	8	7580	20140904-PurClathDigest-1ug-02	244.71	240.76	492470000	275410000	135720000	81342000			523	40	498	1685;1686;1687;1688;1689;1690	2214;2215;2216;2217;2218;2219;2220;2221	2216
KVFGDGSR	Unmodified	864.44537	0.44536545	40	Q08DH7	yes	yes	0	0	0	1	2	2	2	31.837	31.837	2	0.0046007	6	2570	20140904-PurClathDigest-1ug-03	169.09	125.28	87706000	44714000	25597000	17395000			524	40	499	1691;1692;1693;1694;1695;1696	2222;2223;2224;2225;2226;2227	2227
KVGYTPDWIFLLR	Unmodified	1606.8871	0.88714908	38	P49951;F1MPU0	yes	no	0	0	0	1	2	2	2	53.391	53.391	2;3	1.5807E-06	23	7601	20140904-PurClathDigest-1ug-03	177.38	169.66	2385900000	1214800000	715080000	456020000			525	38	500	1697;1698;1699;1700;1701;1702	2228;2229;2230;2231;2232;2233;2234;2235;2236;2237;2238;2239;2240;2241;2242;2243;2244;2245;2246;2247;2248;2249;2250	2247
KVHEEEIAELQAQIQYAQISVEMDVSSKPDLSAALK	Oxidation (M)	4013.0303	0.030327021	32	P02548	yes	yes	0	0	1	2	1		1	52.709	52.709	3	0.062118	2	8353	20140904-PurClathDigest-1ug-01	62.02	62.02	96912000	64597000	0	32315000			526	32	501	1703;1704	2251;2252	2251		118
KVMSQEIQEQLHK	Oxidation (M)	1612.8243	0.82429083	6	E1BDX8	yes	yes	0	0	1	1	1	1	1	33.903	33.903	3	1.5242E-05	3	3143	20140904-PurClathDigest-1ug-02	139.86	130.08	19836000	11165000	4896800	3774500			527	6	502	1705;1706;1707	2253;2254;2255	2254		22
KVSQPIEGHAASFAQFK	Unmodified	1843.9581	0.95808219	38	P49951;F1MPU0	yes	no	0	0	0	1	4	4	4	42.956	42.956	2;3;4	4.4846E-10	38	4185	20140904-PurClathDigest-1ug-03	169.43	160.77	3357900000	1666000000	1114700000	577260000			528	38	503	1708;1709;1710;1711;1712;1713;1714;1715;1716;1717;1718;1719	2256;2257;2258;2259;2260;2261;2262;2263;2264;2265;2266;2267;2268;2269;2270;2271;2272;2273;2274;2275;2276;2277;2278;2279;2280;2281;2282;2283;2284;2285;2286;2287;2288;2289;2290;2291;2292;2293	2289
KVWFPHELGGPGAR	Unmodified	1549.8154	0.81538112	29;24	F1N3M8;G3MYP5	no	no	0	0	0	1	1			40.644	40.644	3	0.000288	1	5219	20140904-PurClathDigest-1ug-01	109.44	106.25	12101000	12101000	0	0			529	24;29	504	1720	2294	2294
KWREEQR	Unmodified	1030.5308	0.53082642	30	P04975;G3N252;F1MX40	yes	no	0	0	0	2	2	2	2	30.394	30.394	2;3	0.010057	6	2572	20140904-PurClathDigest-1ug-01	180.93	87.783	586160000	327050000	143920000	115190000			530	30	505	1721;1722;1723;1724;1725;1726	2295;2296;2297;2298;2299;2300	2296
KWREEQTER	Unmodified	1260.6211	0.62109799	33	P04973	yes	yes	0	0	0	2	2	2	2	30.689	30.689	2;3	3.5467E-06	12	2641	20140904-PurClathDigest-1ug-01	246.63	177.28	979090000	521130000	248030000	209930000			531	33	506	1727;1728;1729;1730;1731;1732	2301;2302;2303;2304;2305;2306;2307;2308;2309;2310;2311;2312	2304
KYEDEINKR	Unmodified	1193.6041	0.60405094	4	CON__P35908;CON__Q7Z794	no	no	0	0	0	2	2	2	2	31.564	31.564	2;3	9.1342E-10	6	2588	20140904-PurClathDigest-1ug-02	250.06	105.16	45226000	25664000	12764000	6798100		+	532	4	507	1733;1734;1735;1736;1737;1738	2313;2314;2315;2316;2317;2318	2316
KYEFGESDLR	Unmodified	1242.5881	0.58806652	6	E1BDX8	yes	yes	0	0	0	1	1			38.942	38.942	2	0.0013939	1	4765	20140904-PurClathDigest-1ug-01	143.5	81.908	2917200	2917200	0	0			533	6	508	1739	2319	2319
LAADDFR	Unmodified	806.39227	0.39226725	2	CON__P13645;P06394;A6QNZ7;CON__P02535-1;CON__P08730-1;Q17QL7;CON__A2A4G1;CON__P08779;CON__P08727;CON__P19001;CON__ENSEMBL:ENSP00000377550;CON__P19012;Q148H6;CON__Q148H6;F1MJ66;CON__Q7Z3Y7;CON__P05784;CON__Q9Z2K1;CON__Q3ZAW8;F1MFW9;CON__Q2M2I5;F1MXG6;F1MSA6;P08728;CON__Q14525;A6QP90;Q148I8;CON__Q9UE12;CON__Q15323;CON__A2A5Y0;CON__Q92764;A7YWM2;CON__Q14532;E1BPW6;E1BFG1;CON__Q6IFX2;CON__A2AB72;Q0P5…	no	no	0	0	0	0	1	1	1	38.392	38.392	2	0.0034703	4	4619	20140904-PurClathDigest-1ug-01	150.02	72.271	37120000	19807000	10012000	7301900		+	534	2	509	1740;1741;1742	2320;2321;2322;2323	2321
LAAEDATNEK	Deamidation (NQ)	1061.4877	0.48768378	32	P02548	yes	yes	0	1	0	0	1			31.774	31.774	2	0.046492	1	2932	20140904-PurClathDigest-1ug-01	110.38	82.9	2374900	2374900	0	0			535	32	510	1743	2324	2324	18
LAAEDATNEK	Unmodified	1060.5037	0.50366819	32	P02548	yes	yes	0	0	0	0	1	1	1	32.034	32.034	2	7.1082E-05	4	2682	20140904-PurClathDigest-1ug-02	170.47	130.4	352300000	197230000	84828000	70238000			536	32	510	1744;1745;1746	2325;2326;2327;2328	2327
LAALADQWQFLVQK	Unmodified	1629.8879	0.88787736	7	E1BFB0	yes	yes	0	0	0	0		1	1	52.248	52.248	2	0.0001036	2	7606	20140904-PurClathDigest-1ug-02	112.44	107.68	11068000	0	7052800	4014900			537	7	511	1747;1748	2329;2330	2329
LADVYQAELR	Unmodified	1176.6139	0.61388734	43	Q28115	yes	yes	0	0	0	0	1	1	2	41.589	41.589	1;2	3.6874E-12	4	4750	20140904-PurClathDigest-1ug-03	156.16	113.87	218610000	106950000	62154000	49499000			538	43	512	1749;1750;1751;1752	2331;2332;2333;2334	2334
LAELEEFINGPNNAHIQQVGDR	Deamidation (NQ)	2464.1983	0.19826548	38	P49951;F1MPU0	yes	no	0	1	0	0	4	3	4	47.274	47.274	2;3	9.9858E-09	21	6222	20140904-PurClathDigest-1ug-02	141.78	139.62	5171800000	2345500000	1387900000	1438500000			539	38	513	1753;1754;1755;1756;1757;1758;1759;1760;1761;1762;1763	2335;2336;2337;2338;2339;2340;2341;2342;2343;2344;2345;2346;2347;2348;2349;2350;2351;2352;2353;2354;2355	2341	32;33;34
LAELEEFINGPNNAHIQQVGDR	Unmodified	2463.2142	0.21424989	38	P49951;F1MPU0	yes	no	0	0	0	0	2	2	2	47.071	47.071	2;3	3.1686E-09	14	6348	20140904-PurClathDigest-1ug-02	127.01	126.43	3612100000	1658700000	1115700000	837630000			540	38	513	1764;1765;1766;1767;1768;1769	2356;2357;2358;2359;2360;2361;2362;2363;2364;2365;2366;2367;2368;2369	2363
LALDLEIATYR	Unmodified	1276.7027	0.70270235	1	CON__P04264	yes	yes	0	0	0	0	1	1	1	49.919	49.919	2	9.6544E-09	7	6762	20140904-PurClathDigest-1ug-03	205.13	157.83	56183000	28201000	14015000	13967000		+	541	1	514	1770;1771;1772	2370;2371;2372;2373;2374;2375;2376	2375
LAQFVEHWK	Unmodified	1156.6029	0.60292873	7	E1BFB0	yes	yes	0	0	0	0		2	1	41.534	41.534	2;3	0.0040114	3	4941	20140904-PurClathDigest-1ug-02	108.26	76.768	11875000	0	8040000	3835500			542	7	515	1773;1774;1775	2377;2378;2379	2377
LASTLVHLGEYQAAVDGAR	Unmodified	1970.0221	0.022139011	38	P49951;F1MPU0	yes	no	0	0	0	0	6	3	3	47.601	47.601	2;3	1.837E-21	38	6185	20140904-PurClathDigest-1ug-01	202.94	201.43	7353700000	3791600000	1900700000	1661500000			543	38	516	1776;1777;1778;1779;1780;1781;1782;1783;1784;1785;1786;1787	2380;2381;2382;2383;2384;2385;2386;2387;2388;2389;2390;2391;2392;2393;2394;2395;2396;2397;2398;2399;2400;2401;2402;2403;2404;2405;2406;2407;2408;2409;2410;2411;2412;2413;2414;2415;2416;2417	2387
LASVSADTDVAR	Unmodified	1203.6095	0.60953025	13	F1MEW3	yes	yes	0	0	0	0	1	1	1	36.585	36.585	2	8.2988E-07	7	3560	20140904-PurClathDigest-1ug-03	167.18	129.62	144030000	74267000	36456000	33304000			544	13	517	1788;1789;1790	2418;2419;2420;2421;2422;2423;2424	2423
LASYLDK	Unmodified	808.43307	0.43306943	2;3	CON__P13645;P06394;A6QNZ7;CON__P08730-1;CON__A2A4G1;CON__P08779;CON__P08727;CON__P19001;CON__P19012;F1MJ66;CON__P05784;CON__Q99456;G3X7W8;G3MX98;CON__P35527	no	no	0	0	0	0	1	1	1	37.547	37.547	2	0.0068945	3	3797	20140904-PurClathDigest-1ug-03	120.49	57.341	51689000	30426000	12938000	8324500		+	545	2;3	518	1791;1792;1793	2425;2426;2427	2427
LASYLDKVQALEEANNDLENK	Unmodified	2376.1809	0.18088408	3	CON__P35527	yes	yes	0	0	0	1	1	1	1	47.2	47.2	2	4.0048E-22	3	6117	20140904-PurClathDigest-1ug-03	212.74	211.44	25203000	9105400	7226300	8871000		+	546	3	519	1794;1795;1796	2428;2429;2430	2430
LASYLDKVR	Unmodified	1063.6026	0.60259438	2	CON__P13645;P06394;A6QNZ7;CON__P08730-1;CON__A2A4G1;CON__P08779;CON__P08727;CON__P19001;CON__P19012;F1MJ66;CON__Q99456	no	no	0	0	0	1	2	2	2	38.623	38.623	2;3	0.0001186	6	4243	20140904-PurClathDigest-1ug-02	144.09	90.338	44255000	26360000	11102000	6793000		+	547	2	520	1797;1798;1799;1800;1801;1802	2431;2432;2433;2434;2435;2436	2434
LATAMQEGEYDAERPPSKPPPVELR	Oxidation (M)	2796.3752	0.37524356	16	F1MIC9	yes	yes	0	0	1	2	1	1	2	39.007	39.007	3;4	0.023386	4	4338	20140904-PurClathDigest-1ug-02	91.238	89.461	82605000	48355000	21895000	12355000			548	16	521	1803;1804;1805;1806	2437;2438;2439;2440	2438		67
LATMPPMVEGEGLASR	2 Oxidation (M)	1689.8066	0.80659185	17	G3N3N0;F1MQL2;G3N0C1	yes	no	0	0	2	0		1	1	39.882	39.882	2	0.012199	2	4528	20140904-PurClathDigest-1ug-02	68.576	65.911	6982000	0	4081700	2900300			549	17	522	1807;1808	2441;2442	2441		69;70
LAVNMVPFPR	Oxidation (M)	1158.6219	0.62194961	47;8;45;49;46	Q2KJD0;Q3MHM5;G3X7R8;Q2HJ81;E1BJB1;Q6B856;G3X7R7;G3N1W7;E1BJK2;CON__ENSEMBL:ENSBTAP00000025008;Q2T9S0;Q3ZBU7	no	no	0	0	1	0	1	2	1	44.161	44.161	2	0.00078849	5	5678	20140904-PurClathDigest-1ug-02	102.07	85.929	27773000	13343000	8275600	6155100			550	45;47;8;46;49	523	1809;1810;1811;1812	2443;2444;2445;2446;2447	2446		46
LDAPSQIEVK	Unmodified	1098.5921	0.59208927	18	F1MRZ5;F1MRZ6	yes	no	0	0	0	0	1			38.943	38.943	2	2.7764E-06	1	4772	20140904-PurClathDigest-1ug-01	116.55	68.262	0	0	0	0			551	18	524	1813	2448	2448
LDASESLRK	Unmodified	1017.5455	0.54547343	38	P49951;F1MPU0	yes	no	0	0	0	1	1	1		33.077	33.077	2	0.0014381	2	2966	20140904-PurClathDigest-1ug-02	177.7	67.293	8234000	6422700	1811300	0			552	38	525	1814;1815	2449;2450	2450
LDENSAFLQFNWK	Unmodified	1610.7729	0.77290718	7	E1BFB0	yes	yes	0	0	0	0	1	1	1	51.864	51.864	2	1.3892E-06	3	7274	20140904-PurClathDigest-1ug-03	125.54	119.13	13104000	5028100	4110000	3965900			553	7	526	1816;1817;1818	2451;2452;2453	2453
LDETGNLMISEGHFASETIR	Oxidation (M)	2235.0478	0.047761414	7	E1BFB0	yes	yes	0	0	1	0	1		1	43.797	43.797	3	0.00028425	2	5307	20140904-PurClathDigest-1ug-03	91.589	87.948	17058000	12209000	0	4849100			554	7	527	1819;1820	2454;2455	2455		34
LDHKFDLMYAK	Oxidation (M)	1395.6857	0.68567208	44	Q2HJ86;F2Z4C1;F6RP72;F2Z4K0;Q3ZCJ7;F1MNF8	no	no	0	0	1	1	1	1	1	38.791	38.791	3	0.0093132	3	4276	20140904-PurClathDigest-1ug-02	97.957	77.833	20570000	13213000	4600900	2756000			555	44	528	1821;1822;1823	2456;2457;2458	2457		179
LDLAGR	Unmodified	643.36532	0.36532422	39	P63258;P60712;F1MRD0	no	no	0	0	0	0	1	1	1	36.438	36.438	2	0.010972	3	3554	20140904-PurClathDigest-1ug-03	122.5	122.5	12346000	6454600	3279900	2611200			556	39	529	1824;1825;1826	2459;2460;2461	2461
LDMYVLNPVK	Oxidation (M)	1206.6318	0.63184559	29;24	F1N3M8;G3MYP5	no	no	0	0	1	0	1		1	42.486	42.486	2	0.016991	2	5675	20140904-PurClathDigest-1ug-01	55.084	47.684	29768000	20378000	0	9389600			557	24;29	530	1827;1828	2462;2463	2462		106
LDMYVLNPVKDSK	Oxidation (M)	1536.7858	0.78578005	29;24	F1N3M8;G3MYP5	no	no	0	0	1	1	2	2	2	40.182	40.182	2;3	3.0991E-05	6	5012	20140904-PurClathDigest-1ug-01	152.16	142.02	148550000	89264000	37625000	21662000			558	24;29	531	1829;1830;1831;1832;1833;1834	2464;2465;2466;2467;2468;2469	2465		106
LDQLTANSAR	Unmodified	1087.5622	0.56218613	43	Q28115	yes	yes	0	0	0	0	1	1	1	34.862	34.862	2	2.1983E-05	3	3372	20140904-PurClathDigest-1ug-02	190.86	121.03	42014000	22287000	10622000	9104900			559	43	532	1835;1836;1837	2470;2471;2472	2471
LDSELK	Unmodified	703.37522	0.3752202	1	CON__P04264	no	no	0	0	0	0	1	1	1	33.417	33.417	2	0.00012904	3	3071	20140904-PurClathDigest-1ug-02	119.22	17.892	7089700	7089700	0	0		+	560	1	533	1838;1839;1840	2473;2474;2475	2474
LDSELKNMQDMVEDYR	2 Oxidation (M)	2016.8769	0.87685626	1	CON__P04264	yes	yes	0	0	2	1	2	1	1	38.508	38.508	2;3	0.016403	4	4049	20140904-PurClathDigest-1ug-03	72.315	70.907	63215000	38578000	11531000	13106000		+	561	1	534	1841;1842;1843;1844	2476;2477;2478;2479	2479		1;2
LEAENNLAAYR	Unmodified	1262.6255	0.62551466	43	Q28115	yes	yes	0	0	0	0	1	1	1	39.93	39.93	2	4.5811E-07	3	4938	20140904-PurClathDigest-1ug-01	190.86	164.33	115080000	59764000	30683000	24631000			562	43	535	1845;1846;1847	2480;2481;2482	2480
LEAENNLAAYRQEADEATLAR	Unmodified	2347.1404	0.14041625	43	Q28115	yes	yes	0	0	0	1	2	2	2	43.665	43.665	2;3	1.3227E-18	6	5259	20140904-PurClathDigest-1ug-03	205.68	198.1	277490000	112230000	78950000	86313000			563	43	536	1848;1849;1850;1851;1852;1853	2483;2484;2485;2486;2487;2488	2487
LEALDANSR	Unmodified	987.49852	0.49852324	33	P04973	yes	yes	0	0	0	0	2	1	1	35.895	35.895	2	1.1796E-05	9	4088	20140904-PurClathDigest-1ug-01	203.35	92.34	1009300000	567460000	231570000	210270000			564	33	537	1854;1855;1856;1857	2489;2490;2491;2492;2493;2494;2495;2496;2497	2492
LEALDANSR	Deamidation (NQ)	988.48254	0.48253882	33	P04973	yes	yes	0	1	0	0	2	2	2	36.77	36.77	2	0.0015405	6	4128	20140904-PurClathDigest-1ug-01	166.09	118.22	206970000	110670000	57739000	38569000			565	33	537	1858;1859;1860;1861;1862;1863	2498;2499;2500;2501;2502;2503	2498	20
LEALDANSRK	Unmodified	1115.5935	0.59348625	33	P04973	yes	yes	0	0	0	1	2	2	2	33.422	33.422	2;3	9.9474E-05	6	3021	20140904-PurClathDigest-1ug-02	130.98	61.158	56943000	36296000	11487000	9160100			566	33	538	1864;1865;1866;1867;1868;1869	2504;2505;2506;2507;2508;2509	2506
LEEEGQSLKDEMAR	Oxidation (M)	1649.7567	0.75666477	43	Q28115	yes	yes	0	0	1	1	1	2	2	33.999	33.999	2;3	3.9624E-09	5	3142	20140904-PurClathDigest-1ug-02	195.24	157.24	226540000	86182000	70919000	69441000			567	43	539	1870;1871;1872;1873;1874	2510;2511;2512;2513;2514	2512		173
LEEEGQSLKDEMAR	Unmodified	1633.7618	0.76175015	43	Q28115	yes	yes	0	0	0	1	2	2	2	37.989	37.989	2;3	1.9521E-10	6	4477	20140904-PurClathDigest-1ug-01	193.06	111.14	39112000	20755000	11578000	6778700			568	43	539	1875;1876;1877;1878;1879;1880	2515;2516;2517;2518;2519;2520	2516
LEEKPTISDK	Unmodified	1158.6132	0.61321864	13	F1MEW3	yes	yes	0	0	0	1	2	1	1	32.76	32.76	2;3	8.464E-05	4	3157	20140904-PurClathDigest-1ug-01	179.72	100.56	39894000	27889000	7505900	4499200			569	13	540	1881;1882;1883;1884	2521;2522;2523;2524	2522
LEEKPTISDKEAMPK	Oxidation (M)	1730.8761	0.87605162	13	F1MEW3	yes	yes	0	0	1	2	1	3	2	32.969	32.969	2;3;4	0.0021557	6	2920	20140904-PurClathDigest-1ug-02	135.09	104.61	125840000	54915000	43928000	26996000			570	13	541	1885;1886;1887;1888;1889;1890	2525;2526;2527;2528;2529;2530	2528		60
LEETQTLLR	Unmodified	1101.603	0.60298831	16	F1MIC9	yes	yes	0	0	0	0	1	1	1	40.403	40.403	2	0.00014899	3	4476	20140904-PurClathDigest-1ug-03	175.51	83.647	15736000	8596600	3605500	3534200			571	16	542	1891;1892;1893	2531;2532;2533	2533
LEGLSESTDYTVLLQAAQDTER	Unmodified	2438.1813	0.18127801	9	E1BKN2	yes	yes	0	0	0	0		1		51.871	51.871	2	0.051026	1	7515	20140904-PurClathDigest-1ug-02	51.31	48.815	14773000	0	14773000	0			572	9	543	1894	2534	2534
LEKHELIEFR	Unmodified	1312.7139	0.71393574	38	P49951;F1MPU0	yes	no	0	0	0	1	4	2	3	41.738	41.738	2;3;4	1.4179E-05	27	4192	20140904-PurClathDigest-1ug-03	201.46	171.45	2661000000	1639000000	370590000	651440000			573	38	544	1895;1896;1897;1898;1899;1900;1901;1902;1903	2535;2536;2537;2538;2539;2540;2541;2542;2543;2544;2545;2546;2547;2548;2549;2550;2551;2552;2553;2554;2555;2556;2557;2558;2559;2560;2561	2558
LEKHELIEFRR	Unmodified	1468.815	0.81504677	38	P49951;F1MPU0	yes	no	0	0	0	2	2	2	2	36.836	36.836	3;4	4.1726E-05	6	3662	20140904-PurClathDigest-1ug-03	159.99	150.45	79304000	46116000	19098000	14091000			574	38	545	1904;1905;1906;1907;1908;1909	2562;2563;2564;2565;2566;2567	2567
LEMNLGLQK	Oxidation (M)	1060.5587	0.55868065	20	F1MYC9	yes	yes	0	0	1	0	1			37.851	37.851	2	0.01105	1	4485	20140904-PurClathDigest-1ug-01	120.33	71.538	2920100	2920100	0	0			575	20	546	1910	2568	2568		80
LEMYVLNPVK	Oxidation (M)	1220.6475	0.64749566	22	F1N1S2	yes	yes	0	0	1	0	1	1		42.365	42.365	2	0.039564	2	5168	20140904-PurClathDigest-1ug-02	97.597	87.048	4341800	0	4341800	0			576	22	547	1911;1912	2569;2570	2570		100
LENEIQTYR	Unmodified	1164.5775	0.57750184	2	CON__P13645;P06394;A6QNZ7;CON__P02535-1	yes	no	0	0	0	0	1	1	1	38.015	38.015	2	6.2613E-06	3	4094	20140904-PurClathDigest-1ug-02	200.11	130.3	21155000	10778000	6817300	3559400		+	577	2	548	1913;1914;1915	2571;2572;2573	2572
LEQEHLLEDIAHVR	Unmodified	1700.8846	0.8845829	19	F1MSQ6	yes	yes	0	0	0	0	1	2	1	44.956	44.956	3;4	1.0538E-16	7	5808	20140904-PurClathDigest-1ug-02	223.06	197.62	336690000	143210000	134920000	58556000			578	19	549	1916;1917;1918;1919	2574;2575;2576;2577;2578;2579;2580	2576
LEVERDNLAQDLGTLR	Unmodified	1840.9643	0.96428978	43	Q28115	yes	yes	0	0	0	1	2	1	2	45.464	45.464	2;3	7.3185E-09	5	5712	20140904-PurClathDigest-1ug-03	172.32	162.63	447430000	238670000	111190000	97575000			579	43	550	1920;1921;1922;1923;1924	2581;2582;2583;2584;2585	2584
LFGAAEVQR	Unmodified	989.52943	0.52942943	7	E1BFB0	yes	yes	0	0	0	0	1	1	1	40.131	40.131	2	0.00014495	3	5006	20140904-PurClathDigest-1ug-01	178.94	123.27	17250000	9651200	4774000	2824800			580	7	551	1925;1926;1927	2586;2587;2588	2586
LGDSHDLQR	Unmodified	1039.5047	0.50467125	7	E1BFB0	yes	yes	0	0	0	0	1		1	32.146	32.146	3	0.011183	2	2598	20140904-PurClathDigest-1ug-03	83.783	57.611	9729400	7777900	0	1951500			581	7	552	1928;1929	2589;2590	2590
LGEDNINVVEGNEQFISASK	Unmodified	2162.0491	0.049141622	31	P00760	yes	yes	0	0	0	0	3	2	2	48.019	48.019	2	8.1024E-09	46	6266	20140904-PurClathDigest-1ug-03	144.27	125.34	3072200000	1397900000	770720000	903590000			582	31	553	1930;1931;1932;1933;1934;1935;1936	2591;2592;2593;2594;2595;2596;2597;2598;2599;2600;2601;2602;2603;2604;2605;2606;2607;2608;2609;2610;2611;2612;2613;2614;2615;2616;2617;2618;2619;2620;2621;2622;2623;2624;2625;2626;2627;2628;2629;2630;2631;2632;2633;2634;2635;2636	2632
LGEDNINVVEGNEQFISASK	Deamidation (NQ)	2163.0332	0.033157207	31	P00760	yes	yes	0	1	0	0		1		45.607	45.607	2	0.00011784	1	5963	20140904-PurClathDigest-1ug-02	115.42	112.99	22355000	0	22355000	0			583	31	553	1937	2637	2637	12
LGESQTLQQFSR	Unmodified	1392.6997	0.69974224	7	E1BFB0	yes	yes	0	0	0	0	1	1	1	41.24	41.24	2	2.3859E-18	3	4893	20140904-PurClathDigest-1ug-02	235.49	174.15	23514000	9227100	7831200	6455400			584	7	554	1938;1939;1940	2638;2639;2640	2639
LGIQAEPLYR	Unmodified	1158.6397	0.63970816	29;24	F1N3M8;G3MYP5	no	no	0	0	0	0	1	1	1	43.107	43.107	2	1.0074E-05	4	5110	20140904-PurClathDigest-1ug-03	195.79	137.09	58844000	37355000	12417000	9071700			585	24;29	555	1941;1942;1943	2641;2642;2643;2644	2643
LGSLVENNER	Unmodified	1129.5728	0.57275081	48	Q3SYW6	yes	yes	0	0	0	0	1			36.538	36.538	2	0.00025788	1	4157	20140904-PurClathDigest-1ug-01	135.86	112.54	3369900	3369900	0	0			586	48	556	1944	2645	2645
LHFFMPGFAPLTSR	Oxidation (M)	1635.8232	0.82316861	47;8;45;49	Q2KJD0;Q3MHM5;E1BJB1;Q6B856;G3X7R7;G3N1W7;Q3ZBU7	no	no	0	0	1	0	1	2	2	48.566	48.566	2;3	8.3441E-05	7	6467	20140904-PurClathDigest-1ug-03	139.7	130.38	67445000	24832000	26848000	15765000			587	45;47;8;49	557	1945;1946;1947;1948;1949	2646;2647;2648;2649;2650;2651;2652	2652		47
LHGQYGPPMFAAPGHALHPGEPALGEAEER	Oxidation (M)	3151.4934	0.49340164	29;24	F1N3M8;G3MYP5	no	no	0	0	1	0	3	3	3	41.107	41.107	3;4;5	6.0091E-07	14	4812	20140904-PurClathDigest-1ug-02	113.15	113.07	203500000	82998000	65849000	54654000			588	24;29	558	1950;1951;1952;1953;1954;1955;1956;1957;1958	2653;2654;2655;2656;2657;2658;2659;2660;2661;2662;2663;2664;2665;2666	2659		107
LHIIEVGTPPTGNQPFPK	Unmodified	1944.0469	0.046897198	38	P49951;F1MPU0	yes	no	0	0	0	0	2	1	1	48.255	48.255	2;3	2.1967E-21	13	5479	20140904-PurClathDigest-1ug-02	214.82	159.92	2522200000	1144800000	739660000	637730000			589	38	559	1959;1960;1961;1962	2667;2668;2669;2670;2671;2672;2673;2674;2675;2676;2677;2678;2679	2672
LHIIEVGTPPTGNQPFPK	Deamidation (NQ)	1945.0309	0.030912783	38	P49951;F1MPU0	yes	no	0	1	0	0		2	2	43.971	43.971	3	0.011256	4	5336	20140904-PurClathDigest-1ug-03	55.011	52.298	0	0	0	0			590	38	559	1963;1964;1965;1966	2680;2681;2682;2683	2682	35;65
LHIIEVGTPPTGNQPFPKK	Unmodified	2072.1419	0.14186022	38	P49951;F1MPU0	yes	no	0	0	0	1	1	1	1	41.168	41.168	3	6.4607E-05	3	4635	20140904-PurClathDigest-1ug-03	103.13	102.11	31066000	12980000	10911000	7174700			591	38	560	1967;1968;1969	2684;2685;2686	2686
LHISQLQHENSTLK	Unmodified	1646.874	0.87401821	16	F1MIC9	yes	yes	0	0	0	0	1	1	1	36.584	36.584	3	1.0833E-11	3	3784	20140904-PurClathDigest-1ug-02	126.56	119.51	15334000	10836000	0	4498900			592	16	561	1970;1971;1972	2687;2688;2689	2688
LHTDLWPQGSPEDIR	Unmodified	1762.8638	0.86384745	29;24	F1N3M8;G3MYP5	no	no	0	0	0	0	1	2	2	43.991	43.991	2;3	2.8493E-11	5	5580	20140904-PurClathDigest-1ug-02	173.44	167.55	65135000	19118000	23118000	22900000			593	24;29	562	1973;1974;1975;1976;1977	2690;2691;2692;2693;2694	2692
LIDDYGVEEEPAELPEGTSLTVDNKR	Unmodified	2888.3927	0.39272735	10	E1BMW9	yes	yes	0	0	0	1			1	45.33	45.33	3	0.059605	1	5646	20140904-PurClathDigest-1ug-03	28.091	27.524	4480400	0	0	4480400			594	10	563	1978	2695	2695
LIDEETNIIQPSTEHTYSK	Unmodified	2217.0801	0.0801074	13	F1MEW3	yes	yes	0	0	0	0	2	2	2	40.783	40.783	2;3	7.515E-18	6	4776	20140904-PurClathDigest-1ug-02	197.38	195.33	192250000	89709000	61877000	40661000			595	13	564	1979;1980;1981;1982;1983;1984	2696;2697;2698;2699;2700;2701	2699
LIDVDHYAKDEVAAR	Unmodified	1713.8686	0.86859848	7	E1BFB0	yes	yes	0	0	0	1	2	2	1	39.743	39.743	3;4	1.8675E-05	5	4322	20140904-PurClathDigest-1ug-03	134.4	129.34	43591000	23063000	13151000	7377700			596	7	565	1985;1986;1987;1988;1989	2702;2703;2704;2705;2706	2706
LIGQIVSSITASLR	Unmodified	1456.8613	0.86132826	44	Q2HJ86;F2Z4C1;F6RP72;F2Z4K0;Q32KN8	yes	no	0	0	0	0	1	1	1	55.598	55.598	2	3.3691E-08	5	8124	20140904-PurClathDigest-1ug-03	161.21	111.76	20834000	9880000	3800000	7153600			597	44	566	1990;1991;1992	2707;2708;2709;2710;2711	2711
LINQPLPDLK	Unmodified	1149.6758	0.67575932	13	F1MEW3	yes	yes	0	0	0	0	1	1	1	43.198	43.198	2	0.00069782	3	5811	20140904-PurClathDigest-1ug-01	117.83	103.75	127850000	71593000	34501000	21758000			598	13	567	1993;1994;1995	2712;2713;2714	2712
LIQEQHPEEELIK	Unmodified	1604.841	0.84098675	7	E1BFB0	yes	yes	0	0	0	0	1	1	1	39.217	39.217	2	2.4554E-06	3	4399	20140904-PurClathDigest-1ug-02	135.14	88.76	20382000	9448200	5427600	5506200			599	7	568	1996;1997;1998	2715;2716;2717	2716
LIQNNHYAMEDVATR	Oxidation (M)	1789.8417	0.8417318	7	E1BFB0	yes	yes	0	0	1	0	1	1	1	35.336	35.336	3	0.003862	3	3307	20140904-PurClathDigest-1ug-03	76.358	71.599	17006000	8752800	4579000	3674100			600	7	569	1999;2000;2001	2718;2719;2720	2720		35
LIQSHPESAEDLQEK	Unmodified	1722.8424	0.84244331	7	E1BFB0	yes	yes	0	0	0	0	1		1	35.033	35.033	3	3.0436E-05	2	3262	20140904-PurClathDigest-1ug-03	112.17	69.856	13268000	9156900	0	4110700			601	7	570	2002;2003	2721;2722	2722
LKDRPPEQK	Unmodified	1109.6193	0.61930707	29	G3MYP5	yes	yes	0	0	0	2	1			30.312	30.312	3	0.046204	1	2555	20140904-PurClathDigest-1ug-01	77.049	25.633	21864000	21864000	0	0			602	29	571	2004	2723	2723
LKLLLPWLEAR	Unmodified	1350.8387	0.83874232	38	P49951;F1MPU0	yes	no	0	0	0	1	2			53.024	53.024	2;3	0.0031927	2	8473	20140904-PurClathDigest-1ug-01	112.94	109.22	14503000	14503000	0	0			603	38	572	2005;2006	2724;2725	2724
LKYENEVALR	Unmodified	1233.6717	0.67173657	2	CON__P13645	yes	yes	0	0	0	1	2	2	2	38.113	38.113	2;3	8.2212E-05	6	4114	20140904-PurClathDigest-1ug-02	145.99	117.78	129090000	74895000	30757000	23434000		+	604	2	573	2007;2008;2009;2010;2011;2012	2726;2727;2728;2729;2730;2731	2729
LLEAQSHFR	Unmodified	1099.5774	0.57744226	7	E1BFB0	yes	yes	0	0	0	0	1	1	2	36.519	36.519	2;3	4.1781E-05	4	3574	20140904-PurClathDigest-1ug-03	195.17	141.4	16816000	8695200	3205400	4915500			605	7	574	2013;2014;2015;2016	2732;2733;2734;2735	2735
LLEGEENR	Unmodified	958.47197	0.47197413	43	Q28115	yes	yes	0	0	0	0	1	1	1	33.829	33.829	2	0.0005135	3	3401	20140904-PurClathDigest-1ug-01	170.66	40.393	45375000	27122000	10624000	7629300			606	43	575	2017;2018;2019	2736;2737;2738	2736
LLEGEETR	Unmodified	945.47673	0.47672516	12;32;40	P02548;F1MDZ2;O77788;Q08DH7	no	no	0	0	0	0	1	1	1	34.437	34.437	2	0.00066914	3	3547	20140904-PurClathDigest-1ug-01	164.53	75.391	243950000	138960000	59199000	45789000			607	32;12;40	576	2020;2021;2022	2739;2740;2741	2739
LLEMNLMHAPQVADAILGNQMFTHYDR	3 Oxidation (M)	3175.4889	0.48890989	38	P49951;F1MPU0	yes	no	0	0	3	0	4	1	3	51.023	51.023	3;4	0.00015188	23	6605	20140904-PurClathDigest-1ug-03	101.45	100.43	6738900000	3986700000	957410000	1794700000			608	38	577	2023;2024;2025;2026;2027;2028;2029;2030	2742;2743;2744;2745;2746;2747;2748;2749;2750;2751;2752;2753;2754;2755;2756;2757;2758;2759;2760;2761;2762;2763;2764	2761		151;152;153
LLEMNLMHAPQVADAILGNQMFTHYDR	2 Oxidation (M)	3159.494	0.49399527	38	P49951;F1MPU0	yes	no	0	0	2	0	2	2	2	50.287	50.287	3;4	8.1117E-05	6	7101	20140904-PurClathDigest-1ug-02	105.35	104.97	754100000	583840000	79551000	90708000			609	38	577	2031;2032;2033;2034;2035;2036	2765;2766;2767;2768;2769;2770	2767		151;152;153
LLEMNLMHAPQVADAILGNQMFTHYDR	Oxidation (M)	3143.4991	0.49908064	38	P49951;F1MPU0	yes	no	0	0	1	0		1		52.317	52.317	3	0.014199	1	7663	20140904-PurClathDigest-1ug-02	53.197	52.852	2987400	0	2987400	0			610	38	577	2037	2771	2771		151;152;153
LLHEVQELTTEVEK	Unmodified	1666.8778	0.87776618	50	Q3ZCF0	yes	yes	0	0	0	0	1	1	1	44.659	44.659	2	2.0498E-12	3	5532	20140904-PurClathDigest-1ug-03	191.78	158.84	49227000	27890000	12100000	9236400			611	50	578	2038;2039;2040	2772;2773;2774	2774
LLLPWLEAR	Unmodified	1109.6597	0.65971533	38	P49951;F1MPU0	yes	no	0	0	0	0	4	2	1	56.402	56.402	1;2	0.00028771	29	8097	20140904-PurClathDigest-1ug-03	163.15	87.413	1470700000	809820000	366870000	294040000			612	38	579	2041;2042;2043;2044;2045;2046;2047	2775;2776;2777;2778;2779;2780;2781;2782;2783;2784;2785;2786;2787;2788;2789;2790;2791;2792;2793;2794;2795;2796;2797;2798;2799;2800;2801;2802;2803	2801
LLPGADYLVSVIALK	Unmodified	1570.9334	0.93343057	18	F1MRZ5;F1MRZ6	yes	no	0	0	0	0	1	1	1	57.278	57.278	2	0.01327	3	8661	20140904-PurClathDigest-1ug-02	71.531	65.636	2838700	1704400	584090	550240			613	18	580	2048;2049;2050	2804;2805;2806	2805
LLPPMRDEPTTR	Oxidation (M)	1440.7395	0.73949856	29	G3MYP5	yes	yes	0	0	1	1		1	2	34.337	34.337	2;3	0.026711	3	3036	20140904-PurClathDigest-1ug-03	72.817	61.87	8774700	0	2111600	6663200			614	29	581	2051;2052;2053	2807;2808;2809	2808		112
LLVSSEDYGR	Unmodified	1137.5666	0.5666028	7	E1BFB0	yes	yes	0	0	0	0	1		1	39.573	39.573	2	0.00011925	2	4302	20140904-PurClathDigest-1ug-03	156.18	118.83	9887000	7701300	0	2185700			615	7	582	2054;2055	2810;2811	2811
LLYNNVSNFGR	Deamidation (NQ)	1296.6463	0.64625011	38	P49951;F1MPU0	yes	no	0	1	0	0	3	3	3	45.35	45.35	2	2.2504E-06	12	6288	20140904-PurClathDigest-1ug-02	204.5	153.05	1920500000	965450000	484340000	470670000			616	38	583	2056;2057;2058;2059;2060;2061;2062;2063;2064	2812;2813;2814;2815;2816;2817;2818;2819;2820;2821;2822;2823	2819	36;37;38
LLYNNVSNFGR	Unmodified	1295.6622	0.66223452	38	P49951;F1MPU0	yes	no	0	0	0	0	2	1	1	59.504	59.504	2	8.6344E-18	4	5213	20140904-PurClathDigest-1ug-03	172.27	134.72	241610	241610	0	0			617	38	583	2065;2066;2067;2068	2824;2825;2826;2827	2827
LNHQEFK	Unmodified	914.46102	0.46101552	7	E1BFB0	yes	yes	0	0	0	0		1		31.618	31.618	2	0.0055022	1	2600	20140904-PurClathDigest-1ug-02	129.55	112.46	2444700	0	2444700	0			618	7	584	2069	2828	2828
LPDASR	Unmodified	657.34459	0.34458878	29;24	F1N3M8;G3MYP5	no	no	0	0	0	0	1	1	1	31.66	31.66	2	0.0072524	3	2467	20140904-PurClathDigest-1ug-03	148.4	22.329	10055000	6583700	2194000	1276900			619	24;29	585	2070;2071;2072	2829;2830;2831	2831
LQEELSQAER	Unmodified	1201.5939	0.59388018	16	F1MIC9	yes	yes	0	0	0	0	1	1	1	36.132	36.132	2	8.1729E-05	3	4022	20140904-PurClathDigest-1ug-01	164.33	99.681	13301000	7299700	2886600	3114500			620	16	586	2073;2074;2075	2832;2833;2834	2832
LQELDAASK	Unmodified	973.50803	0.50802529	30	P04975;G3N252	yes	no	0	0	0	0	1	1	1	35.057	35.057	2	0.00049753	11	3752	20140904-PurClathDigest-1ug-01	126.31	11.815	1405000000	746840000	304170000	354010000			621	30	587	2076;2077;2078	2835;2836;2837;2838;2839;2840;2841;2842;2843;2844;2845	2836
LQIASDENYKDPTNLQGK	Unmodified	2033.0065	0.006548526	7	E1BFB0	yes	yes	0	0	0	1	1	2	2	39.472	39.472	2;3	2.451E-08	5	4244	20140904-PurClathDigest-1ug-03	153.72	132.06	46166000	24588000	12629000	8949200			622	7	588	2079;2080;2081;2082;2083	2846;2847;2848;2849;2850	2850
LQQFLR	Unmodified	803.46537	0.46537261	20	F1MYC9	yes	yes	0	0	0	0	1	1	1	40.361	40.361	2	0.011427	3	4694	20140904-PurClathDigest-1ug-02	113.82	24.045	12400000	6929800	2713200	2757400			623	20	589	2084;2085;2086	2851;2852;2853	2852
LQQLFR	Unmodified	803.46537	0.46537261	7	E1BFB0	yes	yes	0	0	0	0	1			41.151	41.151	2	0.0050146	1	5334	20140904-PurClathDigest-1ug-01	152.49	34.951	4679900	4679900	0	0			624	7	590	2087	2854	2854
LQSEPESIR	Unmodified	1057.5404	0.54038805	33	P04973	yes	yes	0	0	0	0	1	1	1	34.686	34.686	2	0.00013368	8	3200	20140904-PurClathDigest-1ug-03	179.37	29.556	994140000	527550000	230290000	236290000			625	33	591	2088;2089;2090	2855;2856;2857;2858;2859;2860;2861;2862	2861
LQSEPESIRK	Unmodified	1185.6354	0.63535107	33	P04973	yes	yes	0	0	0	1	2	2	2	32.22	32.22	2;3	8.1005E-05	14	2715	20140904-PurClathDigest-1ug-02	126.39	102.32	1356000000	803500000	335470000	217020000			626	33	592	2091;2092;2093;2094;2095;2096	2863;2864;2865;2866;2867;2868;2869;2870;2871;2872;2873;2874;2875;2876	2868
LQSVLGK	Unmodified	743.45414	0.45413923	50	Q3ZCF0	yes	yes	0	0	0	0	1	1	1	36.665	36.665	2	0.0046693	3	3618	20140904-PurClathDigest-1ug-03	140.98	59.603	9884000	5986000	2106900	1791100			627	50	593	2097;2098;2099	2877;2878;2879	2879
LRDDTEAAIR	Unmodified	1158.5993	0.59929991	12	F1MDZ2;O77788	yes	no	0	0	0	1	2	2	2	33.473	33.473	2;3	6.8451E-06	6	2872	20140904-PurClathDigest-1ug-03	214.64	111.45	407730000	245340000	94099000	68288000			628	12	594	2100;2101;2102;2103;2104;2105	2880;2881;2882;2883;2884;2885	2884
LRLDQLTANSAR	Unmodified	1356.7474	0.74736113	43	Q28115	yes	yes	0	0	0	1	2	2	2	40.716	40.716	2;3	1.1127E-13	6	5154	20140904-PurClathDigest-1ug-01	267.23	196.2	131490000	62782000	41120000	27584000			629	43	595	2106;2107;2108;2109;2110;2111	2886;2887;2888;2889;2890;2891	2886
LRSEIDNVK	Unmodified	1072.5877	0.58767259	1	CON__P04264	no	no	0	0	0	1	1	1	1	33.437	33.437	2	0.0024678	3	2882	20140904-PurClathDigest-1ug-03	127.37	75.499	15045000	9078100	3227700	2739000		+	630	1	596	2112;2113;2114	2892;2893;2894	2894
LRSEIDNVKK	Unmodified	1200.6826	0.68263561	1	CON__P04264	no	no	0	0	0	2	2	2	2	31.574	31.574	2;3	5.717E-05	6	2859	20140904-PurClathDigest-1ug-01	171.5	96.732	55260000	32100000	14108000	9051200		+	631	1	597	2115;2116;2117;2118;2119;2120	2895;2896;2897;2898;2899;2900	2895
LSDDNTIGKEEIQQR	Unmodified	1744.8592	0.85915601	7	E1BFB0	yes	yes	0	0	0	1	2	2	2	36.279	36.279	2;3	1.2872E-14	6	4052	20140904-PurClathDigest-1ug-01	236.4	219.52	49458000	23462000	16231000	9765500			632	7	598	2121;2122;2123;2124;2125;2126	2901;2902;2903;2904;2905;2906	2901
LSFTSVGSLTTGYTQSSQVFGR	Unmodified	2322.1492	0.14919002	32	P02548	yes	yes	0	0	0	0	3	1	3	50.332	50.332	2;3	4.677E-13	14	6878	20140904-PurClathDigest-1ug-03	145.77	144.5	389310000	171530000	121040000	96738000			633	32	599	2127;2128;2129;2130;2131;2132;2133	2907;2908;2909;2910;2911;2912;2913;2914;2915;2916;2917;2918;2919;2920	2917
LSGGVSETVFK	Unmodified	1122.5921	0.59208927	14	F1MGK5	yes	yes	0	0	0	0		1	1	41.299	41.299	2	0.0059926	2	4883	20140904-PurClathDigest-1ug-02	100.93	67.843	9713700	0	5412200	4301500			634	14	600	2134;2135	2921;2922	2921
LSKEDIER	Unmodified	988.51892	0.51892433	36	P19120	yes	yes	0	0	0	1		1	1	32.968	32.968	2	0.00069197	2	2922	20140904-PurClathDigest-1ug-02	133.13	14.066	6381800	0	3504000	2877900			635	36	601	2136;2137	2923;2924	2923
LSKEEIER	Unmodified	1002.5346	0.53457439	42	Q27975;Q27965;P0CB32	yes	no	0	0	0	1	1	1	1	32.419	32.419	3	0.0028412	3	3070	20140904-PurClathDigest-1ug-01	115.71	20.213	7335400	4332100	1646600	1356700			636	42	602	2138;2139;2140	2925;2926;2927	2925
LSMKPEPLFR	Oxidation (M)	1232.6587	0.65872905	22	F1N1S2	yes	yes	0	0	1	1	1	1	1	39.004	39.004	3	0.033334	3	4700	20140904-PurClathDigest-1ug-01	82.261	65.093	48127000	30436000	12483000	5207500			637	22	603	2141;2142;2143	2928;2929;2930	2928		101
LSVDYGK	Unmodified	780.40177	0.4017693	44	Q2HJ86;F2Z4C1;F6RP72;F2Z4K0;Q32KN8;Q3ZCJ7;F1MNF8	no	no	0	0	0	0		1	1	36.511	36.511	2	0.04413	2	3555	20140904-PurClathDigest-1ug-03	82.305	34.389	6683900	0	3448500	3235500			638	44	604	2144;2145	2931;2932	2932
LTEAAEQNK	Unmodified	1002.4982	0.49818889	12	F1MDZ2;O77788	yes	no	0	0	0	0	1	1	1	30.732	30.732	2	0.00048236	3	2267	20140904-PurClathDigest-1ug-03	141.48	52.338	72185000	37570000	18226000	16389000			639	12	605	2146;2147;2148	2933;2934;2935	2935
LTELEATVR	Unmodified	1030.5659	0.56587452	50	Q3ZCF0	yes	yes	0	0	0	0			1	39.578	39.578	2	0.00011747	1	4236	20140904-PurClathDigest-1ug-03	182.98	69.096	1453900	0	0	1453900			640	50	606	2149	2936	2936
LTGGANWQPK	Unmodified	1070.5509	0.55089316	15	F1MGT4	yes	yes	0	0	0	0	1			37.484	37.484	2	0.028946	1	4388	20140904-PurClathDigest-1ug-01	81.525	52.355	6338500	6338500	0	0			641	15	607	2150	2937	2937
LTQDEEGNAQLQQR	Unmodified	1628.7754	0.77542638	37	P22439	yes	yes	0	0	0	0		1	1	34.454	34.454	2	4.8098E-22	2	3078	20140904-PurClathDigest-1ug-03	257.95	189.27	8527900	0	4135400	4392500			642	37	608	2151;2152	2938;2939	2939
LTQEPESIR	Unmodified	1071.556	0.55603811	30	P04975;G3N252	yes	no	0	0	0	0	1	1	1	34.88	34.88	2	0.00029829	13	3297	20140904-PurClathDigest-1ug-03	163.16	117.56	1248800000	651660000	288640000	308450000			643	30	609	2153;2154;2155	2940;2941;2942;2943;2944;2945;2946;2947;2948;2949;2950;2951;2952	2951
LTQEPESIRK	Unmodified	1199.651	0.65100113	30	P04975;G3N252	yes	no	0	0	0	1	2	2	2	32.353	32.353	2;3	0.00019005	13	2665	20140904-PurClathDigest-1ug-03	191.4	136.32	1532300000	931800000	362880000	237600000			644	30	610	2156;2157;2158;2159;2160;2161	2953;2954;2955;2956;2957;2958;2959;2960;2961;2962;2963;2964;2965	2965
LTSLVPFVDAFQLER	Unmodified	1733.9352	0.93522148	5	E1B7R4	yes	yes	0	0	0	0	1	1	1	56.822	56.822	2	6.7787E-05	3	8590	20140904-PurClathDigest-1ug-02	114.64	113.26	3843900	2025300	1355100	463500			645	5	611	2162;2163;2164	2966;2967;2968	2967
LTTLELLEVR	Unmodified	1185.6969	0.69688869	20	F1MYC9	yes	yes	0	0	0	0	1			50.08	50.08	2	0.00037562	1	7731	20140904-PurClathDigest-1ug-01	121.9	77.581	9085600	9085600	0	0			646	20	612	2165	2969	2969
LVDTGDKFR	Unmodified	1049.5506	0.55055881	20	F1MYC9	yes	yes	0	0	0	1	1			34.463	34.463	3	0.00213	1	3630	20140904-PurClathDigest-1ug-01	118.5	112.94	4274700	4274700	0	0			647	20	613	2166	2970	2970
LVEDEERR	Unmodified	1044.52	0.51998696	6	E1BDX8	yes	yes	0	0	0	1	1	1	1	31.027	31.027	2	0.0037134	3	2350	20140904-PurClathDigest-1ug-03	171.75	81.997	6819500	3715400	1821000	1283100			648	6	614	2167;2168;2169	2971;2972;2973	2973
LVLTQEQLHQLHDR	Unmodified	1728.9271	0.92711641	16	F1MIC9	yes	yes	0	0	0	0	1	2	2	38.907	38.907	3;4	3.0252E-08	5	4300	20140904-PurClathDigest-1ug-02	147.73	144.71	39739000	20797000	9916500	9025700			649	16	615	2170;2171;2172;2173;2174	2974;2975;2976;2977;2978	2975
LVNHFVEEFKR	Unmodified	1416.7514	0.75138388	42	Q27975;Q27965	yes	no	0	0	0	1	1	1	1	40.077	40.077	3	3.054E-07	3	4402	20140904-PurClathDigest-1ug-03	177.44	161.09	26054000	10265000	10892000	4897100			650	42	616	2175;2176;2177	2979;2980;2981	2981
LYPATEYEISLNSVR	Unmodified	1753.8887	0.88866522	9	E1BKN2	yes	yes	0	0	0	0	1	1	1	47.613	47.613	2	1.6504E-10	3	6501	20140904-PurClathDigest-1ug-02	175.15	151.22	52451000	31135000	10742000	10573000			651	9	617	2178;2179;2180	2982;2983;2984	2983
LYQGAGGPGAGGFGAQGPK	Unmodified	1688.8271	0.82706802	42	Q27975;Q27965	yes	no	0	0	0	0	1	1	1	39.403	39.403	2	4.4271E-06	3	4826	20140904-PurClathDigest-1ug-01	113.47	111.85	30831000	15986000	9865700	4979500			652	42	618	2181;2182;2183	2985;2986;2987	2985
LYSTWIGGSILASLDTFKK	Unmodified	2099.1303	0.13029248	27	F2Z4F0	no	no	0	0	0	1	1	1	1	56.7	56.7	3	0.011933	3	9292	20140904-PurClathDigest-1ug-01	63.302	61.626	7464200	3908400	2406800	1148900			653	27	619	2184;2185;2186	2988;2989;2990	2988
MALDIEIAAYR	Oxidation (M)	1280.6435	0.64347291	12;32;40;19	F1MSQ6;P02548;F1MDZ2;O77788;Q08DH7	no	no	0	0	1	0	1	3	1	46.348	46.348	2	1.0584E-18	10	6324	20140904-PurClathDigest-1ug-02	181.87	123.18	431490000	281650000	0	149850000			654	19;32;12;40	620	2187;2188;2189;2190;2191	2991;2992;2993;2994;2995;2996;2997;2998;2999;3000	2996		53
MALDIEIAAYRK	Oxidation (M)	1408.7384	0.73843593	12;32;40;19	F1MSQ6;P02548;F1MDZ2;O77788;Q08DH7	no	no	0	0	1	1	1	1	1	43.042	43.042	2	2.0691E-07	3	5774	20140904-PurClathDigest-1ug-01	181.68	134.8	23736000	14051000	5529100	4156500			655	19;32;12;40	621	2192;2193;2194	3001;3002;3003	3001		53
MASPPPSGPPSATHTPFHQSPVEEK	Oxidation (M)	2628.2279	0.22785104	29;24	F1N3M8;G3MYP5	no	no	0	0	1	0	2	1	1	36.197	36.197	3;4	0.0020453	4	3523	20140904-PurClathDigest-1ug-03	90.912	89.093	32787000	24693000	4690900	3403400			656	24;29	622	2195;2196;2197;2198	3004;3005;3006;3007	3007		108
MEFHDQQELTPSPAEPLDKK	Oxidation (M)	2355.1053	0.10527629	13	F1MEW3	yes	yes	0	0	1	1	2	2	3	38.019	38.019	2;3;4	4.1455E-10	10	4075	20140904-PurClathDigest-1ug-02	162.32	161.33	366810000	171490000	106310000	89018000			657	13	623	2199;2200;2201;2202;2203;2204;2205	3008;3009;3010;3011;3012;3013;3014;3015;3016;3017	3013		61
MEFHDQQELTPSPAEPLDKK	Deamidation (NQ)	2340.0944	0.094377255	13	F1MEW3	yes	yes	0	1	0	1	1			38.942	38.942	3	0.039461	1	4885	20140904-PurClathDigest-1ug-01	43.37	42.686	17388000	17388000	0	0			658	13	623	2206	3018	3018	60;61
MHEVSFQDKEKEHLTR	Oxidation (M)	2028.9687	0.96872323	28	F6RAG5	yes	yes	0	0	1	2	1			32.804	32.804	4	1.0946E-05	1	3197	20140904-PurClathDigest-1ug-01	150.39	147.06	2936100	2936100	0	0			659	28	624	2207	3019	3019		111
MHTTFEHDIQALGTQVR	Oxidation (M)	1998.9582	0.95815855	20	F1MYC9	yes	yes	0	0	1	0	1	1	1	42.878	42.878	3	6.9248E-06	3	5084	20140904-PurClathDigest-1ug-03	126.63	125.22	20877000	9841700	6239500	4796100			660	20	625	2208;2209;2210	3020;3021;3022	3022		81
MKAHTMTDDVTFWK	2 Oxidation (M)	1741.7804	0.7803771	38	P49951;F1MPU0	yes	no	0	0	2	1	1	2	1	39.932	39.932	2;3	0.00031899	7	4349	20140904-PurClathDigest-1ug-03	133.23	130.08	627890000	278240000	220070000	129590000			661	38	626	2211;2212;2213;2214	3023;3024;3025;3026;3027;3028;3029	3028		142;154
MKEIAEAYLGK	Oxidation (M)	1267.6482	0.64822394	36	P19120	yes	yes	0	0	1	1	2	1	1	38.289	38.289	2;3	0.00084521	4	4207	20140904-PurClathDigest-1ug-02	115.57	103.99	3934000	3934000	0	0			662	36	627	2215;2216;2217;2218	3030;3031;3032;3033	3032		130
MLGYFSLVGLLR	Oxidation (M)	1383.7584	0.75844309	51	Q3ZCK1	yes	yes	0	0	1	0	1			57.072	57.072	2	0.00051533	1	9406	20140904-PurClathDigest-1ug-01	95.477	86.588	0	0	0	0			663	51	628	2219	3034	3034		184
MLTAQDMSYDEAR	2 Oxidation (M)	1561.6389	0.63885782	20	F1MYC9	yes	yes	0	0	2	0	1	1	1	35.839	35.839	2	0.011686	3	3632	20140904-PurClathDigest-1ug-02	70.68	70.114	10743000	5477600	3117600	2147900			664	20	629	2220;2221;2222	3035;3036;3037	3036		82;83
MPLATSTDHGHNLQTVQLLIK	Oxidation (M)	2332.2209	0.22091517	20	F1MYC9	yes	yes	0	0	1	0	1	1	1	43.082	43.082	3	5.2747E-09	3	5139	20140904-PurClathDigest-1ug-03	126.26	125.27	56961000	26488000	15329000	15144000			665	20	630	2223;2224;2225	3038;3039;3040	3040		84
MPPPLPAR	Oxidation (M)	893.47931	0.47930812	43	Q28115	yes	yes	0	0	1	0	1	1	1	34.933	34.933	2	0.040447	3	3357	20140904-PurClathDigest-1ug-02	106.43	91.647	70575000	42421000	13330000	14824000			666	43	631	2226;2227;2228	3041;3042;3043	3042		174
MQEQQADLQR	Oxidation (M)	1261.5721	0.57209888	16	F1MIC9	yes	yes	0	0	1	0	1	1	1	32.157	32.157	2	0.00029596	3	2710	20140904-PurClathDigest-1ug-02	160.18	153.28	20604000	10879000	5508400	4216900			667	16	632	2229;2230;2231	3044;3045;3046	3045		68
MQHNLEQQIQAR	Oxidation (M)	1510.7311	0.73105914	7	E1BFB0	yes	yes	0	0	1	0	1			35.203	35.203	2	0.029703	1	3813	20140904-PurClathDigest-1ug-01	89.44	82.963	14050000	14050000	0	0			668	7	633	2232	3047	3047		36
MQMLEDEDDLAYAETEKK	2 Oxidation (M)	2189.9344	0.93443072	6	E1BDX8	yes	yes	0	0	2	1	1		1	39.785	39.785	3	0.011775	2	4350	20140904-PurClathDigest-1ug-03	114.03	113.94	13229000	9049200	0	4179700			669	6	634	2233;2234	3048;3049	3049		23;24
MREHLELFWSR	Oxidation (M)	1518.7402	0.74016727	38	P49951;F1MPU0	yes	no	0	0	1	1	2	2	2	44.189	44.189	2;3	0.0013073	27	5945	20140904-PurClathDigest-1ug-01	118.61	104.52	2577900000	1082600000	793550000	701680000			670	38	635	2235;2236;2237;2238;2239;2240	3050;3051;3052;3053;3054;3055;3056;3057;3058;3059;3060;3061;3062;3063;3064;3065;3066;3067;3068;3069;3070;3071;3072;3073;3074;3075;3076	3057		155
MREHLELFWSR	Unmodified	1502.7453	0.74525264	38	P49951;F1MPU0	yes	no	0	0	0	1	1	1	1	45.089	45.089	3	1.2238E-05	3	5877	20140904-PurClathDigest-1ug-02	155.99	152.19	31085000	14744000	10040000	6300900			671	38	635	2241;2242;2243	3077;3078;3079	3078
MSATFIGNSTAIQELFK	Oxidation (M)	1872.9291	0.92914983	47;8	Q3MHM5;G3X7R8;Q2HJ81;E1BJB1;Q6B856	no	no	0	0	1	0		1	1	53.018	53.018	2	1.5107E-07	2	7773	20140904-PurClathDigest-1ug-02	149	18.709	13210000	0	7722500	5487100			672	47;8	636	2244;2245	3080;3081	3080		48
MSSTFIGNSTAIQELFK	Oxidation (M)	1888.9241	0.92406445	46	Q2T9S0	yes	yes	0	0	1	0		1		52.664	52.664	2	0.0019104	1	7727	20140904-PurClathDigest-1ug-02	96.773	95.155	2658300	0	2658300	0			673	46	637	2246	3082	3082		182
MTLDDFR	Oxidation (M)	912.40112	0.40111738	3	CON__P35527	yes	yes	0	0	1	0	1	1	2	39.916	39.916	2	0.014728	5	4380	20140904-PurClathDigest-1ug-03	128.86	68.567	19092000	8843300	4392100	5856100		+	674	3	638	2247;2248;2249;2250	3083;3084;3085;3086;3087	3087		9
MTLVASEDYGDTLAAIQGLLK	Oxidation (M)	2224.1297	0.12970013	7	E1BFB0	yes	yes	0	0	1	0	1	1	1	56.848	56.848	2	0.0029496	3	8595	20140904-PurClathDigest-1ug-02	92.932	92.465	8851700	4633300	2851400	1367000			675	7	639	2251;2252;2253	3088;3089;3090	3089		37
MVNHFIAEFK	Oxidation (M)	1250.6118	0.61177885	36	P19120	yes	yes	0	0	1	0	1	1	2	41.663	41.663	2;3	0.00080669	4	4769	20140904-PurClathDigest-1ug-03	131.83	120.88	39882000	20569000	7085000	12228000			676	36	640	2254;2255;2256;2257	3091;3092;3093;3094	3094		131
MVNHFIAEFKR	Oxidation (M)	1406.7129	0.71288988	36	P19120	yes	yes	0	0	1	1	1	1	1	39.489	39.489	3	0.0011245	3	4278	20140904-PurClathDigest-1ug-03	115.89	97.028	10813000	6153000	2514600	2145100			677	36	641	2258;2259;2260	3095;3096;3097	3097		131
MVQEAEKYKAEDEK	Oxidation (M)	1712.7927	0.79271593	36	P19120	yes	yes	0	0	1	2		1		31.224	31.224	3	0.0043032	1	2526	20140904-PurClathDigest-1ug-02	103.76	98.706	3355900	0	3355900	0			678	36	642	2261	3098	3098		132
MYDAAK	Unmodified	697.31051	0.31051146	38	P49951;F1MPU0	yes	no	0	0	0	0		1	1	31.711	31.711	2	0.050167	2	2621	20140904-PurClathDigest-1ug-02	80.377	21.717	9715700	0	5905600	3810100			679	38	643	2262;2263	3099;3100	3099
NAELLR	Unmodified	714.40244	0.40243801	43	Q28115	yes	yes	0	0	0	0	1	1	1	35.711	35.711	2	0.010651	3	3858	20140904-PurClathDigest-1ug-01	106.76	7.2504	70403000	45159000	14035000	11209000			680	43	644	2264;2265;2266	3101;3102;3103	3101
NHEEEMKDLR	Oxidation (M)	1315.5827	0.58266357	2	CON__P13645	yes	yes	0	0	1	1	1	1	1	30.371	30.371	3	0.0024167	3	2317	20140904-PurClathDigest-1ug-02	122.7	98.445	49710000	27764000	12760000	9185900		+	681	2	645	2267;2268;2269	3104;3105;3106	3105		4
NHKEEMSQLTGQNSGDVNVEINVAPGK	Oxidation (M)	2910.3778	0.37776276	3	CON__P35527	yes	yes	0	0	1	1		1		38.948	38.948	3	0.059495	1	4311	20140904-PurClathDigest-1ug-02	50.505	49.908	5324800	0	5324800	0		+	682	3	646	2270	3107	3107		10
NKDDLTLSR	Unmodified	1060.5513	0.55128709	13	F1MEW3	yes	yes	0	0	0	1	1	1	1	34.539	34.539	3	0.024416	3	3310	20140904-PurClathDigest-1ug-02	80.755	53.274	32549000	21497000	5340900	5711000			683	13	647	2271;2272;2273	3108;3109;3110	3109
NKLNDLEDALQQAK	Unmodified	1598.8264	0.82639932	1	CON__P04264	yes	yes	0	0	0	1	1	1	1	45.476	45.476	2	2.7012E-22	3	5983	20140904-PurClathDigest-1ug-02	276.31	253.88	40214000	19639000	13269000	7305300		+	684	1	648	2274;2275;2276	3111;3112;3113	3112
NKLNDLEDALQQAKEDLAR	Unmodified	2183.1182	0.11822424	1	CON__P04264	yes	yes	0	0	0	2	1	1	1	51.026	51.026	3	4.4189E-18	3	7326	20140904-PurClathDigest-1ug-02	214.26	213.19	23948000	13125000	4338100	6485500		+	685	1	649	2277;2278;2279	3114;3115;3116	3115
NKLNDLEEALQQAKEDLAR	Unmodified	2197.1339	0.1338743	4	CON__P35908	yes	yes	0	0	0	2	1			51.29	51.29	3	2.5477E-13	1	8028	20140904-PurClathDigest-1ug-01	189.84	188.84	4870700	4870700	0	0		+	686	4	650	2280	3117	3117
NKPGVYTK	Unmodified	905.49707	0.49706667	31	P00760;CON__P00761;CON__P07477;G3MXS2;G3N0B7;E1BQ07;E1BFR6	yes	no	0	0	0	1	2	2	2	30.489	30.489	2;3	0.011507	6	2330	20140904-PurClathDigest-1ug-02	121.85	65.727	605740000	332300000	160340000	113100000			687	31	651	2281;2282;2283;2284;2285;2286	3118;3119;3120;3121;3122;3123	3120
NKYEDEINKR	Unmodified	1307.647	0.64697839	1	CON__P04264	no	no	0	0	0	2	1	1	1	33.308	33.308	3	1.0557E-05	3	3272	20140904-PurClathDigest-1ug-01	208.6	202.17	120640000	66977000	28298000	25369000		+	688	1	652	2287;2288;2289	3124;3125;3126	3124
NLDIERPTYTNLNR	Unmodified	1717.8747	0.87474649	44	Q2HJ86;F2Z4C1;F6RP72;F2Z4K0;Q32KN8;Q3ZCJ7	no	no	0	0	0	1		1	2	40.916	40.916	2;3	6.0023E-17	3	4790	20140904-PurClathDigest-1ug-02	254.58	177.39	69272000	0	29817000	39455000			689	44	653	2290;2291;2292	3127;3128;3129	3127
NLDLDSIIAEVK	Unmodified	1328.7187	0.71874635	4	CON__P35908	no	no	0	0	0	0		1	1	53.421	53.421	2	0.011278	2	7877	20140904-PurClathDigest-1ug-02	82.705	72.88	13737000	0	7460400	6276700		+	690	4	654	2293;2294	3130;3131	3130
NLILVVR	Unmodified	825.54362	0.54362294	38	P49951;F1MPU0	yes	no	0	0	0	0	1	1	1	44.591	44.591	2	0.0076518	9	6176	20140904-PurClathDigest-1ug-01	114.02	25.289	962680000	517030000	245760000	199890000			691	38	655	2295;2296;2297	3132;3133;3134;3135;3136;3137;3138;3139;3140	3133
NLILVVR	Deamidation (NQ)	826.52764	0.52763852	38	P49951;F1MPU0	yes	no	0	1	0	0	1	1	1	48.388	48.388	2	0.041886	3	7213	20140904-PurClathDigest-1ug-01	124.89	45.434	18812000	11225000	4127900	3459400			692	38	655	2298;2299;2300	3141;3142;3143	3141	39
NLISPDLGVVFLNVPENLK	Unmodified	2080.1568	0.15684158	22	F1N1S2	yes	yes	0	0	0	0	1	1	1	56.622	56.622	2	0.00074349	3	9286	20140904-PurClathDigest-1ug-01	85.737	84.329	13765000	6610500	4507900	2646200			693	22	656	2301;2302;2303	3144;3145;3146	3144
NLISPELGVVFFNVPDK	Unmodified	1887.0142	0.014200086	29;24	F1N3M8;G3MYP5	no	no	0	0	0	0		1		56.118	56.118	2	0.0013425	1	8453	20140904-PurClathDigest-1ug-02	74.618	73.897	5590800	0	5590800	0			694	24;29	657	2304	3147	3147
NLISPELGVVFFNVPDKLR	Unmodified	2156.1994	0.19937509	29;24	F1N3M8;G3MYP5	no	no	0	0	0	1	2	2	2	54.582	54.582	2;3	1.2E-08	7	7901	20140904-PurClathDigest-1ug-03	158.58	135.14	78247000	46242000	15653000	16353000			695	24;29	658	2305;2306;2307;2308;2309;2310	3148;3149;3150;3151;3152;3153;3154	3154
NLQNLLILTAIK	Unmodified	1352.8391	0.83913625	38	P49951;F1MPU0	yes	no	0	0	0	0	3	2	2	55.663	55.663	1;2	3.8349E-07	30	7744	20140904-PurClathDigest-1ug-03	185.37	172.18	2241800000	1232000000	618940000	390880000			696	38	659	2311;2312;2313;2314;2315;2316;2317	3155;3156;3157;3158;3159;3160;3161;3162;3163;3164;3165;3166;3167;3168;3169;3170;3171;3172;3173;3174;3175;3176;3177;3178;3179;3180;3181;3182;3183;3184	3176
NLQNLLILTAIK	Deamidation (NQ)	1353.8232	0.82315184	38	P49951;F1MPU0	yes	no	0	1	0	0	2	1		56.132	56.132	2	0.0081301	3	9154	20140904-PurClathDigest-1ug-01	102.87	94.462	23546000	18736000	4810500	0			697	38	659	2318;2319;2320	3185;3186;3187	3185	40;66
NLQNLLILTAIKADR	Unmodified	1695.0043	0.004304102	38	P49951;F1MPU0	yes	no	0	0	0	1	2	2	2	51.777	51.777	2;3	1.0432E-16	6	7254	20140904-PurClathDigest-1ug-03	239.75	237.97	67003000	27020000	19999000	19984000			698	38	660	2321;2322;2323;2324;2325;2326	3188;3189;3190;3191;3192;3193	3193
NLQSAEEWYK	Unmodified	1266.5881	0.58806652	40	Q08DH7	yes	yes	0	0	0	0	1	1	1	43.104	43.104	2	0.0003575	3	5349	20140904-PurClathDigest-1ug-02	121.9	85.482	156000000	94497000	36238000	25264000			699	40	661	2327;2328;2329	3194;3195;3196	3195
NMNKDDEEEITK	Oxidation (M)	1480.6352	0.63515265	18	F1MRZ5;F1MRZ6	yes	no	0	0	1	1	1	1	1	31.559	31.559	2	0.0004189	3	2598	20140904-PurClathDigest-1ug-02	111.31	107.74	10404000	5846900	2844700	1712200			700	18	662	2330;2331;2332	3197;3198;3199	3198		71
NMQDMVEDYR	2 Oxidation (M)	1331.5122	0.51220074	1	CON__P04264	yes	yes	0	0	2	0	2	2	2	35.369	35.369	2	0.0020511	6	3258	20140904-PurClathDigest-1ug-03	108.93	107.49	42105000	19581000	9914200	12610000		+	701	1	663	2333;2334;2335;2336;2337;2338	3200;3201;3202;3203;3204;3205	3204		1;2
NMQNAEEWFK	Oxidation (M)	1311.5554	0.55538619	32	P02548	yes	yes	0	0	1	0	1		1	43.586	43.586	2	0.0042259	2	5916	20140904-PurClathDigest-1ug-01	123.96	112.04	198590000	144510000	0	54078000			702	32	664	2339;2340	3206;3207	3206		119
NMQNAEEWFK	Oxidation (M);Deamidation (NQ)	1312.5394	0.53940177	32	P02548	yes	yes	0	1	1	0			1	46.642	46.642	2	0.049599	1	5981	20140904-PurClathDigest-1ug-03	48.284	46.845	1559000	0	0	1559000			703	32	664	2341	3208	3208	19	119
NNLAGAEELFAR	Unmodified	1303.6521	0.65206377	38	P49951;F1MPU0	yes	no	0	0	0	0	1	1	1	46.571	46.571	2	2.2066E-09	17	5939	20140904-PurClathDigest-1ug-03	223.87	159.14	2767400000	1162400000	859080000	745920000			704	38	665	2342;2343;2344	3209;3210;3211;3212;3213;3214;3215;3216;3217;3218;3219;3220;3221;3222;3223;3224;3225	3220
NNLAGAEELFAR	Deamidation (NQ)	1304.6361	0.63607935	38	P49951;F1MPU0	yes	no	0	1	0	0	3	4	4	49.243	49.243	2	3.1654E-08	17	6702	20140904-PurClathDigest-1ug-03	217.14	140.91	877240000	434630000	232430000	210170000			705	38	665	2345;2346;2347;2348;2349;2350;2351;2352;2353;2354;2355	3226;3227;3228;3229;3230;3231;3232;3233;3234;3235;3236;3237;3238;3239;3240;3241;3242	3240	41;42
NNRPSEGPLQTR	Unmodified	1367.6906	0.69057454	38	P49951;F1MPU0	yes	no	0	0	0	1	4	3	4	34.781	34.781	2;3	4.2898E-08	40	2851	20140904-PurClathDigest-1ug-02	215.51	199.16	3862800000	2063800000	1049500000	749440000			706	38	666	2356;2357;2358;2359;2360;2361;2362;2363;2364;2365;2366	3243;3244;3245;3246;3247;3248;3249;3250;3251;3252;3253;3254;3255;3256;3257;3258;3259;3260;3261;3262;3263;3264;3265;3266;3267;3268;3269;3270;3271;3272;3273;3274;3275;3276;3277;3278;3279;3280;3281;3282	3259
NNRPSEGPLQTR	Deamidation (NQ)	1368.6746	0.67459012	38	P49951;F1MPU0	yes	no	0	1	0	1	4	3	4	34.352	34.352	2;3	2.7365E-07	22	3226	20140904-PurClathDigest-1ug-02	203.7	185.63	1214600000	704810000	251340000	258450000			707	38	666	2367;2368;2369;2370;2371;2372;2373;2374;2375;2376;2377	3283;3284;3285;3286;3287;3288;3289;3290;3291;3292;3293;3294;3295;3296;3297;3298;3299;3300;3301;3302;3303;3304	3290	43;44
NQALNTDNYGHDLASVQALQR	Unmodified	2327.1254	0.12543488	7	E1BFB0	yes	yes	0	0	0	0	2	1	1	43.428	43.428	2;3	1.0555E-13	4	5899	20140904-PurClathDigest-1ug-01	162.76	158.56	71031000	48349000	13203000	9478500			708	7	667	2378;2379;2380;2381	3305;3306;3307;3308	3306
NQILNLTTDNANILLQIDNAR	Unmodified	2366.2554	0.25538642	2	CON__P13645	yes	yes	0	0	0	0	1			53.011	53.011	2	4.5484E-13	1	8470	20140904-PurClathDigest-1ug-01	168.79	168.54	23087000	23087000	0	0		+	709	2	668	2382	3309	3309
NQLTAMSSVLAK	Oxidation (M)	1277.6649	0.66493664	5	E1B7R4	yes	yes	0	0	1	0		1		38.71	38.71	2	0.019053	1	4271	20140904-PurClathDigest-1ug-02	99.5	67.171	1711200	0	1711200	0			710	5	669	2383	3310	3310		18
NQTAEKEEFEHQQK	Unmodified	1744.8016	0.80164113	36	P19120	yes	yes	0	0	0	1			1	31.394	31.394	3	2.2971E-08	1	2406	20140904-PurClathDigest-1ug-03	166.48	152.39	3554200	0	0	3554200			711	36	670	2384	3311	3311
NQVALNPQNTVFDAK	Unmodified	1657.8424	0.84238373	42	Q27975;Q27965	yes	no	0	0	0	0	1	1	1	43.201	43.201	2	0.00041426	3	5819	20140904-PurClathDigest-1ug-01	102.65	98.787	31069000	15284000	10478000	5306300			712	42	671	2385;2386;2387	3312;3313;3314	3312
NQVAMNPTNTVFDAK	Oxidation (M)	1664.7828	0.78281994	36	P19120	yes	yes	0	0	1	0	1		1	40.103	40.103	2	7.5563E-08	2	4381	20140904-PurClathDigest-1ug-03	168.5	159.46	101870000	79498000	0	22370000			713	36	672	2388;2389	3315;3316	3316		133
NQVAMNPTNTVFDAKR	Oxidation (M)	1820.8839	0.88393097	36	P19120	yes	yes	0	0	1	1			1	38.227	38.227	3	8.6933E-06	1	3941	20140904-PurClathDigest-1ug-03	143.05	138	1948900	0	0	1948900			714	36	673	2390	3317	3317		133
NSKIEISELNR	Unmodified	1301.6939	0.69392858	1	CON__P04264	yes	yes	0	0	0	1			1	38.486	38.486	2	0.0037761	1	4003	20140904-PurClathDigest-1ug-03	109.72	59.572	2599600	0	0	2599600		+	715	1	674	2391	3318	3318
NSLESYAFNMK	Oxidation (M)	1318.5864	0.58635197	36	P19120	yes	yes	0	0	1	0	1	1	1	42.492	42.492	2	0.012938	3	5641	20140904-PurClathDigest-1ug-01	108.9	105.93	43252000	23604000	9385600	10262000			716	36	675	2392;2393;2394	3319;3320;3321	3319		134
NTLFNLSNFLDK	Unmodified	1424.73	0.72997974	15	F1MGT4;F1N605	yes	no	0	0	0	0	1	1	1	54.571	54.571	2	0.0001158	3	8770	20140904-PurClathDigest-1ug-01	134.99	94.514	30990000	18479000	5071600	7439700			717	15	676	2395;2396;2397	3322;3323;3324	3322
NTTGVTEEALK	Unmodified	1161.5877	0.58773217	7	E1BFB0	yes	yes	0	0	0	0		1		36.253	36.253	2	0.022911	1	3696	20140904-PurClathDigest-1ug-02	80.834	34.015	3527700	0	3527700	0			718	7	677	2398	3325	3325
NVAQYNANHPDFPMQSEQLER	Oxidation (M)	2503.1186	0.11863495	6	E1BDX8	yes	yes	0	0	1	0	1		1	39.87	39.87	3	0.0058206	2	4948	20140904-PurClathDigest-1ug-01	61.276	60.394	19339000	12459000	0	6879400			719	6	678	2399;2400	3326;3327	3326		25
NVDVEFFKR	Unmodified	1152.5928	0.59275797	22	F1N1S2	yes	yes	0	0	0	1		1		42.955	42.955	2	0.0020396	1	5312	20140904-PurClathDigest-1ug-02	164.68	159.58	1508100	0	1508100	0			720	22	679	2401	3328	3328
NVETMNYADIER	Oxidation (M)	1469.6457	0.64565776	34	P11179;F1MEQ3	yes	no	0	0	1	0	1	1	1	39.142	39.142	2	0.00032211	3	4375	20140904-PurClathDigest-1ug-02	121.01	108.75	17743000	7600200	4636600	5506600			721	34	680	2402;2403;2404	3329;3330;3331	3330		122
NVQALEIELQSQLALK	Unmodified	1796.0044	0.0043636815	2	CON__P13645	yes	yes	0	0	0	0		1	1	52.896	52.896	2	5.0126E-05	2	7755	20140904-PurClathDigest-1ug-02	114.63	111.57	9354300	0	5412000	3942300		+	722	2	681	2405;2406	3332;3333	3332
NVQDAIADAEQR	Unmodified	1328.6321	0.6320566	4	CON__P35908	yes	yes	0	0	0	0	1	1		41.037	41.037	2	1.2818E-05	2	5282	20140904-PurClathDigest-1ug-01	140.91	125.52	15548000	6450400	9097900	0		+	723	4	682	2407;2408	3334;3335	3334
NVSTGDVNVEMNAAPGVDLTQLLNNMR	Unmodified	2871.3855	0.38549067	2	CON__P13645;CON__P02535-1	yes	yes	0	0	0	0	1			55.922	55.922	2	0.050658	1	9186	20140904-PurClathDigest-1ug-01	52.465	52.358	3915400	3915400	0	0		+	724	2	683	2409	3336	3336
NVSTGDVNVEMNAAPGVDLTQLLNNMR	2 Oxidation (M)	2903.3753	0.37531992	2	CON__P13645;CON__P02535-1	yes	yes	0	0	2	0		1		50.272	50.272	2	0.056318	1	7125	20140904-PurClathDigest-1ug-02	40.208	40.205	14634000	0	14634000	0		+	725	2	683	2410	3337	3337		5;6
NYSPYYNTIDDLKDQIVDLTVGNNK	Unmodified	2901.4032	0.40323245	3	CON__P35527	yes	yes	0	0	0	1		1		55.703	55.703	3	0.05523	1	8370	20140904-PurClathDigest-1ug-02	37.373	36.755	10354000	0	10354000	0		+	726	3	684	2411	3338	3338
PISADSAIMNPASK	Oxidation (M)	1416.6919	0.69187967	38	P49951;F1MPU0	yes	no	0	0	1	0	1	1	1	37.605	37.605	2	3.1263E-10	3	3984	20140904-PurClathDigest-1ug-02	180.95	165.4	55327000	33821000	14043000	7462700			727	38	685	2412;2413;2414	3339;3340;3341	3340		156
PLLLNDLLMVLSPR	Oxidation (M)	1608.9273	0.92729933	38	P49951;F1MPU0	yes	no	0	0	1	0	1	1		58.097	58.097	2	0.004056	2	9578	20140904-PurClathDigest-1ug-01	102.65	96.978	4513700	1955700	2557900	0			728	38	686	2415;2416	3342;3343	3342		157
PRVIGLLRPLK	Unmodified	1260.8394	0.83941103	26	F1N757	yes	yes	0	0	0	2			1	56.237	56.237	1	0.062385	1	8195	20140904-PurClathDigest-1ug-03	0	0	2162300	0	0	2162300			729	26	687	2417	3344	3344
PSSILPPR	Unmodified	865.50215	0.50215205	13	F1MEW3	yes	yes	0	0	0	0	1	1	1	37.755	37.755	2	0.00011231	3	4022	20140904-PurClathDigest-1ug-02	210.26	156.05	16029000	11263000	2500100	2266600			730	13	688	2418;2419;2420	3345;3346;3347	3346
QALQGER	Unmodified	800.41407	0.41406533	32	P02548	yes	yes	0	0	0	0	1	1	1	31.025	31.025	2	0.0027144	3	2469	20140904-PurClathDigest-1ug-02	158.2	47.865	36221000	20671000	8773400	6776900			731	32	689	2421;2422;2423	3348;3349;3350	3349
QALQGEREGLEETLR	Unmodified	1727.8802	0.8802258	32	P02548	yes	yes	0	0	0	1	2	1	1	39.771	39.771	2;3	1.2936E-38	4	4550	20140904-PurClathDigest-1ug-02	309.87	267.56	103280000	70380000	19368000	13528000			732	32	690	2424;2425;2426;2427	3351;3352;3353;3354	3353
QASHAQLGDAYDQEIR	Unmodified	1800.8391	0.83908927	12	F1MDZ2;O77788	yes	no	0	0	0	0	2	2	2	38.25	38.25	2;3	1.2562E-16	8	3953	20140904-PurClathDigest-1ug-03	214.82	212.75	448190000	212030000	129890000	106270000			733	12	691	2428;2429;2430;2431;2432;2433	3355;3356;3357;3358;3359;3360;3361;3362	3361
QDEQLQK	Unmodified	887.43486	0.43486035	33	P04973	yes	yes	0	0	0	0	1	1	1	30.872	30.872	2	0.001166	3	2696	20140904-PurClathDigest-1ug-01	178.3	61.137	133530000	75375000	35062000	23091000			734	33	692	2434;2435;2436	3363;3364;3365	3363
QEADEATLAR	Unmodified	1102.5255	0.52546627	43	Q28115	yes	yes	0	0	0	0	1	1	1	34.257	34.257	2	0.00017644	3	3227	20140904-PurClathDigest-1ug-02	145.23	66.293	90201000	59866000	16864000	13471000			735	43	693	2437;2438;2439	3366;3367;3368	3367
QEFAQHANAFHQWIQETR	Unmodified	2240.0511	0.051147728	7	E1BFB0	yes	yes	0	0	0	0	1		1	43.438	43.438	3	1.4238E-08	2	5246	20140904-PurClathDigest-1ug-03	123.14	119.87	20848000	16123000	0	4725100			736	7	694	2440;2441	3369;3370	3370
QEYDESGPSIVHR	Unmodified	1515.6954	0.69538514	39	P63258;P60712;F1MRD0	yes	no	0	0	0	0	1	1	1	36.549	36.549	3	5.9723E-10	3	3766	20140904-PurClathDigest-1ug-02	193.28	181.01	20464000	9736400	5880200	4847700			737	39	695	2442;2443;2444	3371;3372;3373	3372
QEYEQLIAK	Unmodified	1120.5764	0.57643921	3	CON__P35527	yes	yes	0	0	0	0	1	1	1	40.138	40.138	2	1.0684E-06	3	5004	20140904-PurClathDigest-1ug-01	208.11	136.42	34828000	21424000	8210100	5194000		+	738	3	696	2445;2446;2447	3374;3375;3376	3374
QFQDAGHFDAENIKK	Unmodified	1746.8325	0.83254733	7	E1BFB0	yes	yes	0	0	0	1	1		1	37.348	37.348	4	0.011409	2	4331	20140904-PurClathDigest-1ug-01	50.806	47.78	11367000	9321700	0	2045300			739	7	697	2448;2449	3377;3378	3377
QGVDADINGLR	Deamidation (NQ)	1157.5677	0.56766543	3	CON__P35527	yes	yes	0	1	0	0	1	1	1	39.339	39.339	2	0.00075922	3	4818	20140904-PurClathDigest-1ug-01	148.19	104.24	24606000	14612000	5506000	4488000		+	740	3	698	2450;2451;2452	3379;3380;3381	3379	2
QILELEER	Unmodified	1028.5502	0.55022446	40	Q08DH7	yes	yes	0	0	0	0	1	1	1	41.743	41.743	2	0.00061516	4	4784	20140904-PurClathDigest-1ug-03	164.77	30.624	173850000	95054000	43356000	35436000			741	40	699	2453;2454;2455	3382;3383;3384;3385	3384
QKLQDETNQR	Unmodified	1258.6266	0.6265773	43	Q28115	yes	yes	0	0	0	1	2	1	1	30.81	30.81	2;3	1.2997E-05	4	2422	20140904-PurClathDigest-1ug-02	204.28	139.63	64137000	42581000	12669000	8886900			742	43	700	2456;2457;2458;2459	3386;3387;3388;3389	3388
QLFHPEQLITGK	Unmodified	1409.7667	0.76669959	44	Q2HJ86;F2Z4C1;F6RP72;F2Z4K0;Q32KN8	no	no	0	0	0	0	1	1	1	44.72	44.72	2	4.649E-09	3	5791	20140904-PurClathDigest-1ug-02	205.8	161.9	26834000	14377000	6587400	5870100			743	44	701	2460;2461;2462	3390;3391;3392	3391
QLFHPEQLITGKEDAANNYAR	Unmodified	2414.1979	0.19787154	44	Q2HJ86;F2Z4C1;F6RP72;F2Z4K0;Q32KN8	no	no	0	0	0	1	2	2	1	43.436	43.436	3;4	1.6397E-13	5	5444	20140904-PurClathDigest-1ug-02	173.21	170.71	79822000	54824000	17767000	7231200			744	44	702	2463;2464;2465;2466;2467	3393;3394;3395;3396;3397	3395
QLPLVKPYLR	Unmodified	1225.7547	0.75467834	38	P49951;F1MPU0	yes	no	0	0	0	1	2	2	2	42.547	42.547	2;3	0.00016798	17	5704	20140904-PurClathDigest-1ug-01	141.48	126.15	1772400000	878460000	467030000	426870000			745	38	703	2468;2469;2470;2471;2472;2473	3398;3399;3400;3401;3402;3403;3404;3405;3406;3407;3408;3409;3410;3411;3412;3413;3414	3403
QLQELEDK	Unmodified	1001.5029	0.50293991	32	P02548	yes	yes	0	0	0	0	1	1	1	35.96	35.96	2	0.00091322	3	3427	20140904-PurClathDigest-1ug-03	153.08	6.273	67188000	36527000	18872000	11789000			746	32	704	2474;2475;2476	3415;3416;3417	3417
QLQELEDKQNADISAMQDTINK	Oxidation (M)	2547.2123	0.21226056	32	P02548	yes	yes	0	0	1	1		1	1	38.987	38.987	3	0.040779	2	4108	20140904-PurClathDigest-1ug-03	47.155	46.938	15722000	0	7561200	8161100			747	32	705	2477;2478	3418;3419	3419		120
QLQELEDKQNADISAMQDTINKLENELR	Oxidation (M)	3301.6096	0.60961319	32	P02548	yes	yes	0	0	1	2		1	1	48.25	48.25	3	5.7638E-08	4	6600	20140904-PurClathDigest-1ug-02	159.46	159.04	72197000	0	37307000	34890000			748	32	706	2479;2480	3420;3421;3422;3423	3420		120
QLQELEDKQNADISAMQDTINKLENELR	Unmodified	3285.6147	0.61469857	32	P02548	yes	yes	0	0	0	2		1	1	54.425	54.425	4	0.05312	2	8077	20140904-PurClathDigest-1ug-02	51.966	51.911	11520000	0	4884800	6635600			749	32	706	2481;2482	3424;3425	3424
QLQSISQAAASGGAK	Unmodified	1415.7369	0.73685603	6	E1BDX8	yes	yes	0	0	0	0	1	1	1	36.901	36.901	2	7.6532E-08	3	3845	20140904-PurClathDigest-1ug-02	153.14	93.035	12499000	5903100	3891000	2705200			750	6	707	2483;2484;2485	3426;3427;3428	3427
QLSPESLGTLQFGELSLGKEEK	Unmodified	2389.2377	0.23767067	29;24	F1N3M8;G3MYP5	no	no	0	0	0	1		1	1	50.081	50.081	3	0.029077	2	6825	20140904-PurClathDigest-1ug-03	61.345	59.132	34746000	0	14924000	19823000			751	24;29	708	2486;2487	3429;3430	3430
QLWGLLIEETEKR	Unmodified	1613.8777	0.8777066	20	F1MYC9	yes	yes	0	0	0	1	1			50.595	50.595	3	0.00035774	1	7853	20140904-PurClathDigest-1ug-01	109.96	107.48	3114400	3114400	0	0			752	20	709	2488	3431	3431
QNADISAMQDTINKLENELR	Oxidation (M)	2318.1172	0.11723796	32	P02548	yes	yes	0	0	1	1	2	2	2	48.098	48.098	2;3	2.9183E-06	6	6329	20140904-PurClathDigest-1ug-03	142.43	134.51	124450000	61002000	31279000	32174000			753	32	710	2489;2490;2491;2492;2493;2494	3432;3433;3434;3435;3436;3437	3436		120
QNADISAMQDTINKLENELR	Unmodified	2302.1223	0.12232334	32	P02548	yes	yes	0	0	0	1	1			54.397	54.397	3	2.3481E-09	1	8828	20140904-PurClathDigest-1ug-01	171.98	170.79	13724000	13724000	0	0			754	32	710	2495	3438	3438
QNLDGLLNQLK	Unmodified	1254.6932	0.6932003	6	E1BDX8	yes	yes	0	0	0	0	1			49.184	49.184	2	1.4527E-06	1	7485	20140904-PurClathDigest-1ug-01	173.64	155.9	5871200	5871200	0	0			755	6	711	2496	3439	3439
QPSIAISSK	Unmodified	929.5182	0.51819605	12	F1MDZ2;O77788	yes	no	0	0	0	0	1		1	35.821	35.821	2	0.050701	2	3444	20140904-PurClathDigest-1ug-03	74.841	48.948	27288000	18076000	0	9212100			756	12	712	2497;2498	3440;3441	3441
QQQPPPETFDFK	Unmodified	1460.6936	0.69359423	16	F1MIC9	yes	yes	0	0	0	0			1	42.76	42.76	2	0.0002148	1	4996	20140904-PurClathDigest-1ug-03	115.33	79.649	3135300	0	0	3135300			757	16	713	2499	3442	3442
QQVAPMDDETGK	Oxidation (M)	1333.582	0.58199487	7	E1BFB0	yes	yes	0	0	1	0			1	31.596	31.596	2	0.040442	1	2459	20140904-PurClathDigest-1ug-03	89.189	84.395	1833200	0	0	1833200			758	7	714	2500	3443	3443		38
QREEAEAATR	Unmodified	1159.5582	0.55816338	19	F1MSQ6	yes	yes	0	0	0	1	2	1	2	30.314	30.314	2;3	3.3788E-11	5	2301	20140904-PurClathDigest-1ug-02	252.69	170.04	79199000	52532000	10644000	16023000			759	19	715	2501;2502;2503;2504;2505	3444;3445;3446;3447;3448	3446
QRLDDEAR	Unmodified	1001.489	0.48902118	19	F1MSQ6	yes	yes	0	0	0	1	2	2	2	30.982	30.982	2;3	6.7133E-14	6	2330	20140904-PurClathDigest-1ug-03	203.64	90.463	31370000	21531000	7222100	2616600			760	19	716	2506;2507;2508;2509;2510;2511	3449;3450;3451;3452;3453;3454	3454
QRSELEDR	Unmodified	1031.4996	0.49958587	19	F1MSQ6	yes	yes	0	0	0	1	1	1		30.968	30.968	2;3	0.00010183	2	2726	20140904-PurClathDigest-1ug-01	220.39	97.651	10742000	8438000	2304100	0			761	19	717	2512;2513	3455;3456	3455
QSALISWQPPRAEIENYILTYK	Unmodified	2619.3697	0.3696879	9	E1BKN2	yes	yes	0	0	0	1	1		1	52.549	52.549	3	0.00078917	2	7430	20140904-PurClathDigest-1ug-03	77.959	74.598	7913400	5142000	0	2771400			762	9	718	2514;2515	3457;3458	3458
QSLEASLAETEGR	Unmodified	1389.6736	0.67358707	2	CON__P13645;P06394;A6QNZ7;CON__P02535-1	yes	no	0	0	0	0	1	1	1	42.498	42.498	2	2.2453E-09	3	4957	20140904-PurClathDigest-1ug-03	200.82	139.47	29857000	16956000	6664300	6237300		+	763	2	719	2516;2517;2518	3459;3460;3461	3461
QSLLSQSHAHQQFLR	Unmodified	1778.9176	0.91761436	20	F1MYC9	yes	yes	0	0	0	0	1	1	1	38.603	38.603	3	3.2358E-09	3	4065	20140904-PurClathDigest-1ug-03	157.2	144.4	21246000	12533000	4618000	4095000			764	20	720	2519;2520;2521	3462;3463;3464	3464
QSVEADINGLR	Deamidation (NQ)	1201.5939	0.59388018	2	CON__P13645;P06394;A6QNZ7;CON__P02535-1;CON__P08730-1;Q17QL7;CON__ENSEMBL:ENSP00000377550;CON__P13646-1;CON__Q7Z3Y8;CON__Q2M2I5	yes	no	0	1	0	0	1			39.33	39.33	2	0.04338	1	4878	20140904-PurClathDigest-1ug-01	105.46	71.585	7643800	7643800	0	0		+	765	2	721	2522	3465	3465	1
QSVEADINGLR	Unmodified	1200.6099	0.6098646	2	CON__P13645;P06394;A6QNZ7;CON__P02535-1;CON__P08730-1;Q17QL7;CON__ENSEMBL:ENSP00000377550;CON__P13646-1;CON__Q7Z3Y8;CON__Q2M2I5	yes	no	0	0	0	0	1	1	1	41.96	41.96	2	2.8687E-06	3	5080	20140904-PurClathDigest-1ug-02	164.65	127.1	11919000	4654900	4294300	2969800		+	766	2	721	2523;2524;2525	3466;3467;3468	3467
QSVEADINGLRR	Deamidation (NQ)	1357.695	0.69499121	2	CON__P13645;P06394;A6QNZ7;CON__P02535-1;CON__P08730-1;Q17QL7;CON__ENSEMBL:ENSP00000377550;CON__P13646-1;CON__Q7Z3Y8	yes	no	0	1	0	1	1	1	1	37.167	37.167	2	8.1603E-21	3	4278	20140904-PurClathDigest-1ug-01	303.79	246.5	24136000	13408000	6661000	4067600		+	767	2	722	2526;2527;2528	3469;3470;3471	3469	1
QSVEADINGLRR	Unmodified	1356.711	0.71097563	2	CON__P13645;P06394;A6QNZ7;CON__P02535-1;CON__P08730-1;Q17QL7;CON__ENSEMBL:ENSP00000377550;CON__P13646-1;CON__Q7Z3Y8	yes	no	0	0	0	1	1	2	2	40.074	40.074	2;3	6.0553E-18	5	4962	20140904-PurClathDigest-1ug-01	240.85	187.61	24190000	10769000	6805100	6615200		+	768	2	722	2529;2530;2531;2532;2533	3472;3473;3474;3475;3476	3472
QTEPVEAYVIQK	Unmodified	1403.7296	0.72964538	22	F1N1S2	yes	yes	0	0	0	0	1	1	1	41.591	41.591	2	0.00019522	3	4748	20140904-PurClathDigest-1ug-03	111.94	99.668	37490000	20807000	9120700	7562100			769	22	723	2534;2535;2536	3477;3478;3479	3479
QTPLSR	Unmodified	700.38679	0.38678794	30	P04975;G3N252	yes	no	0	0	0	0	1	2	1	32.313	32.313	2	0.0026207	4	3008	20140904-PurClathDigest-1ug-01	109.11	54.902	0	0	0	0			770	30	724	2537;2538;2539;2540	3480;3481;3482;3483	3480
QVLDNLTMEK	Oxidation (M)	1205.5962	0.59618837	3	CON__P35527	yes	yes	0	0	1	0	1	1	1	39.841	39.841	2	0.0078524	3	4548	20140904-PurClathDigest-1ug-02	121.36	88.17	27640000	12285000	8980700	6374000		+	771	3	725	2541;2542;2543	3484;3485;3486	3485		11
QWELLLEK	Unmodified	1057.5808	0.5807963	7	E1BFB0	yes	yes	0	0	0	0	1	1		49.44	49.44	2	0.0072172	2	7500	20140904-PurClathDigest-1ug-01	101.65	44.925	5894300	4171500	1722800	0			772	7	726	2544;2545	3487;3488	3487
RDLATDLSLIEVK	Unmodified	1471.8246	0.8246084	13	F1MEW3	yes	yes	0	0	0	1	1	1	1	47.388	47.388	2	1.0643E-07	3	6187	20140904-PurClathDigest-1ug-03	203.32	112.7	16424000	7646400	4297200	4480100			773	13	727	2546;2547;2548	3489;3490;3491	3491
REEFVQWVELLPDTQTPSWLGLPNNAEK	Unmodified	3295.6513	0.65134207	6	E1BDX8	yes	yes	0	0	0	1	1	1	1	56.227	56.227	3	0.005847	3	8519	20140904-PurClathDigest-1ug-02	70.718	70.321	6910200	4414000	1389900	1106300			774	6	728	2549;2550;2551	3492;3493;3494	3493
REEVAEEGAK	Unmodified	1116.5411	0.54111633	29;24	F1N3M8;G3MYP5	no	no	0	0	0	1	1	1	1	30.454	30.454	2	3.9473E-07	3	2593	20140904-PurClathDigest-1ug-01	248.98	146.92	89312000	47970000	23941000	17401000			775	24;29	729	2552;2553;2554	3495;3496;3497	3495
RFDDAVVQSDMK	Oxidation (M)	1425.6558	0.65582851	36	P19120	yes	yes	0	0	1	1	1	2	2	35.488	35.488	2;3	4.7624E-05	5	3515	20140904-PurClathDigest-1ug-02	142.39	44.435	45255000	18411000	17927000	8916700			776	36	730	2555;2556;2557;2558;2559	3498;3499;3500;3501;3502	3499		135
RGLDDDRGPR	Unmodified	1155.5745	0.57448215	5	E1B7R4	yes	yes	0	0	0	2	1			31.021	31.021	3	0.0014156	1	2717	20140904-PurClathDigest-1ug-01	127.93	78.769	9491600	9491600	0	0			777	5	731	2560	3503	3503
RGVSGDRDENSFSLNSSISSAR	Unmodified	2340.1054	0.10542772	13	F1MEW3	yes	yes	0	0	0	2	1	1	1	39.189	39.189	3	3.339E-19	3	4188	20140904-PurClathDigest-1ug-03	226.99	223.57	53541000	17388000	17928000	18225000			778	13	732	2561;2562;2563	3504;3505;3506	3506
RHHQEEVGELLGQIQSSSAAQTQAEAR	Unmodified	2959.4496	0.44962257	19	F1MSQ6	yes	yes	0	0	0	1	1	2	1	42.709	42.709	3;4	5.6006E-08	4	5224	20140904-PurClathDigest-1ug-02	124.97	123.56	62873000	22164000	27374000	13335000			779	19	733	2564;2565;2566;2567	3507;3508;3509;3510	3509
RIAAYLFK	Unmodified	980.58074	0.58073672	38	P49951;F1MPU0	yes	no	0	0	0	1	2	2	1	41.611	41.611	2;3	0.019729	5	4752	20140904-PurClathDigest-1ug-03	125.5	76.936	974940000	512810000	237210000	224910000			780	38	734	2568;2569;2570;2571;2572	3511;3512;3513;3514;3515	3515
RIDSLMDEIAFLK	Oxidation (M)	1565.8123	0.81232916	32	P02548	yes	yes	0	0	1	1	2	1	2	49.038	49.038	2;3	0.00086526	5	7360	20140904-PurClathDigest-1ug-01	110.14	89.338	77962000	47893000	12685000	17384000			781	32	735	2573;2574;2575;2576;2577	3516;3517;3518;3519;3520	3516		117
RIDSLMDEIAFLKK	Oxidation (M)	1693.9073	0.90729217	32	P02548	yes	yes	0	0	1	2	1	1	1	45.953	45.953	3	0.044832	3	5828	20140904-PurClathDigest-1ug-03	79.652	67.159	76884000	37797000	21521000	17567000			782	32	736	2578;2579;2580	3521;3522;3523	3523		117
RKDPELWGSVLLESNPYR	Unmodified	2158.1171	0.11710203	38	P49951	yes	yes	0	0	0	2	6	5	5	50.715	50.715	2;3;4	8.5363E-18	46	6635	20140904-PurClathDigest-1ug-02	220.34	219.03	4319200000	2148300000	1178300000	992530000			783	38	737	2581;2582;2583;2584;2585;2586;2587;2588;2589;2590;2591;2592;2593;2594;2595;2596	3524;3525;3526;3527;3528;3529;3530;3531;3532;3533;3534;3535;3536;3537;3538;3539;3540;3541;3542;3543;3544;3545;3546;3547;3548;3549;3550;3551;3552;3553;3554;3555;3556;3557;3558;3559;3560;3561;3562;3563;3564;3565;3566;3567;3568;3569	3550
RLEAELAAHEPAIQGVLDTGK	Unmodified	2217.1753	0.17534519	7	E1BFB0	yes	yes	0	0	0	1		1		44.49	44.49	3	0.00015096	1	5709	20140904-PurClathDigest-1ug-02	98.3	95.185	4076500	0	4076500	0			784	7	738	2597	3570	3570
RLGPGTR	Unmodified	755.44022	0.4402205	43	Q28115	yes	yes	0	0	0	1	1	1		30.801	30.801	2	0.038145	2	2435	20140904-PurClathDigest-1ug-02	130.04	44.978	14232000	8935800	5296000	0			785	43	739	2598;2599	3571;3572	3572
RLQELDAASK	Unmodified	1129.6091	0.60913632	30	P04975;G3N252	yes	no	0	0	0	1	1	1	1	34.1	34.1	2	9.9326E-05	6	3504	20140904-PurClathDigest-1ug-01	202.68	76.714	351480000	194900000	87092000	69490000			786	30	740	2600;2601;2602	3573;3574;3575;3576;3577;3578	3574
RNEVLDR	Unmodified	900.47773	0.47772821	7	E1BFB0	yes	yes	0	0	0	1	1	1	1	31.894	31.894	2	0.007823	3	2529	20140904-PurClathDigest-1ug-03	184.49	60.805	21700000	12444000	5825800	3429900			787	7	741	2603;2604;2605	3579;3580;3581	3581
RNIVVK	Deamidation (NQ)	728.45447	0.45447358	43	Q28115	yes	yes	0	1	0	1	1		1	33.137	33.137	2	0.059554	2	2820	20140904-PurClathDigest-1ug-03	42.719	24.584	6164100	4824600	0	1339400			788	43	742	2606;2607	3582;3583	3583	56
RPISADSAIMNPASK	Oxidation (M)	1572.793	0.7929907	38	P49951;F1MPU0	yes	no	0	0	1	1	5	4	5	38.641	38.641	2;3	3.3117E-08	48	3312	20140904-PurClathDigest-1ug-03	163.84	148.2	4850000000	2918000000	1039900000	892110000			789	38	743	2608;2609;2610;2611;2612;2613;2614;2615;2616;2617;2618;2619;2620;2621	3584;3585;3586;3587;3588;3589;3590;3591;3592;3593;3594;3595;3596;3597;3598;3599;3600;3601;3602;3603;3604;3605;3606;3607;3608;3609;3610;3611;3612;3613;3614;3615;3616;3617;3618;3619;3620;3621;3622;3623;3624;3625;3626;3627;3628;3629;3630;3631	3620		156
RPISADSAIMNPASK	Unmodified	1556.7981	0.79807608	38	P49951;F1MPU0	yes	no	0	0	0	1	1	1	1	37.838	37.838	2	1.0651E-15	4	4031	20140904-PurClathDigest-1ug-02	231.41	219.35	93121000	61493000	20370000	11257000			790	38	743	2622;2623;2624	3632;3633;3634;3635	3634
RPLIDQVVQTALSETQDPEEVSVTVK	Unmodified	2880.508	0.50803187	38	P49951	yes	yes	0	0	0	1	1	1	1	53.357	53.357	2	0.001133	9	7497	20140904-PurClathDigest-1ug-03	106.88	106.31	1933000000	822570000	661410000	449020000			791	38	744	2625;2626;2627	3636;3637;3638;3639;3640;3641;3642;3643;3644	3642
RPSPHAEEELEVEEAAEAQAEPK	Unmodified	2545.1932	0.19323968	13	F1MEW3	yes	yes	0	0	0	1	3	3	3	40.372	40.372	2;3;4	9E-06	9	4443	20140904-PurClathDigest-1ug-03	97.352	96.961	317690000	164190000	86420000	67079000			792	13	745	2628;2629;2630;2631;2632;2633;2634;2635;2636	3645;3646;3647;3648;3649;3650;3651;3652;3653	3652
RQDLEDSLQAQQYFADANEAESWMR	Oxidation (M)	3016.3257	0.32572719	7	E1BFB0	yes	yes	0	0	1	1		1	1	48.604	48.604	3	0.027349	2	6478	20140904-PurClathDigest-1ug-03	65.428	60.834	15301000	0	8358500	6943000			793	7	746	2637;2638	3654;3655	3655		39
RQQVLDR	Unmodified	913.50936	0.50936269	7	E1BFB0	yes	yes	0	0	0	1	1	1	1	31.163	31.163	2	0.008375	3	2773	20140904-PurClathDigest-1ug-01	198.07	101	4825700	2595200	1338700	891790			794	7	747	2639;2640;2641	3656;3657;3658	3656
RSELEEQQMHLNVGLR	Oxidation (M)	1953.9691	0.96905758	6	E1BDX8	yes	yes	0	0	1	1	1	1	1	38.726	38.726	3	0.00013131	3	4091	20140904-PurClathDigest-1ug-03	101.42	95.607	16151000	9734300	3658100	2758400			795	6	748	2642;2643;2644	3659;3660;3661	3661		26
RSPASDGLDLSQAAAR	Unmodified	1613.8121	0.81214624	40	Q08DH7	yes	yes	0	0	0	1	3	2	1	38.976	38.976	2;3	5.9956E-23	8	4066	20140904-PurClathDigest-1ug-03	277.34	216.1	141130000	97486000	31565000	12081000			796	40	749	2645;2646;2647;2648;2649;2650	3662;3663;3664;3665;3666;3667;3668;3669	3669
RSYVSSSEMVVGGR	Oxidation (M)	1528.7304	0.73039044	43	Q28115	yes	yes	0	0	1	1	1			35.296	35.296	2	0.060322	1	3842	20140904-PurClathDigest-1ug-01	44.44	32.172	8559900	8559900	0	0			797	43	750	2651	3670	3670		175
RTPVIDADKPVSSQLR	Unmodified	1780.9795	0.97954591	6	E1BDX8	yes	yes	0	0	0	2	1	1	1	37.019	37.019	3	0.00018144	3	3685	20140904-PurClathDigest-1ug-03	127.83	127.14	11861000	7090100	2918400	1852900			798	6	751	2652;2653;2654	3671;3672;3673	3673
RVEAAQETVADYQQTIKK	Unmodified	2077.0804	0.080382171	16	F1MIC9	yes	yes	0	0	0	2	1	1		37.795	37.795	3	0.00013384	2	4078	20140904-PurClathDigest-1ug-02	112.74	110.22	14133000	10181000	3951800	0			799	16	752	2655;2656	3674;3675	3675
RVLDELTLTK	Unmodified	1186.6921	0.69213767	2	CON__P13645;P06394;A6QNZ7;Q17QL7	yes	no	0	0	0	1	1	1	1	41.46	41.46	2	0.00023634	3	4949	20140904-PurClathDigest-1ug-02	186.81	125.03	25048000	16331000	4805200	3912100		+	800	2	753	2657;2658;2659	3676;3677;3678	3677
RYVETPR	Unmodified	919.48756	0.48756462	32	P02548	yes	yes	0	0	0	1	1	1	1	31.554	31.554	2	0.0019653	3	2842	20140904-PurClathDigest-1ug-01	208.22	142.44	102510000	59074000	27030000	16401000			801	32	754	2660;2661;2662	3679;3680;3681	3679
SAAGSSSGFHSWAR	Unmodified	1406.6327	0.63272531	19	F1MSQ6	yes	yes	0	0	0	0	2	2	2	37.557	37.557	2;3	3.3046E-22	6	4352	20140904-PurClathDigest-1ug-01	267.86	246.8	147620000	80162000	39737000	27724000			802	19	755	2663;2664;2665;2666;2667;2668	3682;3683;3684;3685;3686;3687	3683
SAASLNSR	Unmodified	804.40898	0.40897995	31	P00760	yes	yes	0	0	0	0	1	1	1	31.135	31.135	2	1.5627E-08	3	2353	20140904-PurClathDigest-1ug-03	147.36	75.485	199460000	136210000	63246000	0			803	31	756	2669;2670;2671	3688;3689;3690	3690
SAASLNSR	Deamidation (NQ)	805.393	0.39299553	31	P00760	yes	yes	0	1	0	0	2	1	2	31.411	31.411	2	1.2696E-05	5	2900	20140904-PurClathDigest-1ug-01	136.27	64.553	36241000	17425000	8678100	10138000			804	31	756	2672;2673;2674;2675;2676	3691;3692;3693;3694;3695	3692	13
SADESGQALLAAGHYASDEVR	Unmodified	2145.9927	0.99268938	7	E1BFB0	yes	yes	0	0	0	0	1	1	1	43.799	43.799	3	6.4996E-06	3	5993	20140904-PurClathDigest-1ug-01	100.28	95.025	38820000	21365000	8466500	8988200			805	7	757	2677;2678;2679	3696;3697;3698	3696
SAILVPSEK	Unmodified	942.5386	0.53859714	13	F1MEW3	yes	yes	0	0	0	0			1	38.448	38.448	2	0.061456	1	3947	20140904-PurClathDigest-1ug-03	60.064	38.536	5896100	0	0	5896100			806	13	758	2680	3699	3699
SAILVPSEKK	Unmodified	1070.6336	0.63356015	13	F1MEW3	yes	yes	0	0	0	1			1	34.978	34.978	3	0.056545	1	3222	20140904-PurClathDigest-1ug-03	45.433	39.128	2439000	0	0	2439000			807	13	759	2681	3700	3700
SAKEEIAEYR	Unmodified	1194.5881	0.58806652	12	F1MDZ2;O77788	yes	no	0	0	0	1	2	2	2	34.915	34.915	2;3	3.401E-05	6	3649	20140904-PurClathDigest-1ug-01	187.31	159.13	292840000	154860000	64142000	73840000			808	12	760	2682;2683;2684;2685;2686;2687	3701;3702;3703;3704;3705;3706	3701
SAKEEIAEYRR	Unmodified	1350.6892	0.68917755	12	F1MDZ2;O77788	yes	no	0	0	0	2	2	2	2	33.536	33.536	2;3	1.7323E-05	6	3322	20140904-PurClathDigest-1ug-01	191.23	110.53	125530000	78817000	23500000	23212000			809	12	761	2688;2689;2690;2691;2692;2693	3707;3708;3709;3710;3711;3712	3708
SALAPR	Unmodified	613.35476	0.35475953	12	F1MDZ2;O77788	yes	no	0	0	0	0			1	31.746	31.746	2	0.04284	1	2481	20140904-PurClathDigest-1ug-03	86.344	18.503	6497700	0	0	6497700			810	12	762	2694	3713	3713
SANGFPYREDEEGAFGEHGSQGTYSNTK	Deamidation (NQ)	3035.2806	0.28055113	13	F1MEW3	yes	yes	0	1	0	1	1	1	1	40.512	40.512	3	0.0067641	3	4478	20140904-PurClathDigest-1ug-03	101.73	99.106	27367000	12300000	7193900	7872700			811	13	763	2695;2696;2697	3714;3715;3716	3716	8
SAQEEISEYR	Unmodified	1210.5466	0.54659564	19	F1MSQ6	yes	yes	0	0	0	0	1	1	1	37.88	37.88	2	3.6061E-05	3	4443	20140904-PurClathDigest-1ug-01	180.07	168.43	62186000	31824000	18121000	12241000			812	19	764	2698;2699;2700	3717;3718;3719	3717
SAQEEISEYRR	Unmodified	1366.6477	0.64770667	19	F1MSQ6	yes	yes	0	0	0	1	2	2	2	35.746	35.746	2;3	7.7644E-06	6	3885	20140904-PurClathDigest-1ug-01	181.66	141.79	130920000	62668000	40933000	27314000			813	19	765	2701;2702;2703;2704;2705;2706	3720;3721;3722;3723;3724;3725	3720
SAVEDEGLK	Unmodified	946.46074	0.46074075	42	Q27975;Q27965	yes	no	0	0	0	0	1	1	1	34.264	34.264	2	0.024084	3	3077	20140904-PurClathDigest-1ug-03	88.495	67.87	10165000	6763600	1722600	1678800			814	42	766	2707;2708;2709	3726;3727;3728	3728
SAYGGLQTSSYLMSAR	Oxidation (M)	1706.7934	0.79338463	32	P02548	yes	yes	0	0	1	0	1	1	1	42.749	42.749	2	0.0018511	6	4994	20140904-PurClathDigest-1ug-03	117.07	114.04	464450000	228170000	128960000	107310000			815	32	767	2710;2711;2712	3729;3730;3731;3732;3733;3734	3733		121
SAYGGLQTSSYLMSAR	Unmodified	1690.7985	0.79847001	32	P02548	yes	yes	0	0	0	0			1	45.303	45.303	2	5.3293E-06	1	5645	20140904-PurClathDigest-1ug-03	131.56	107.5	3016200	0	0	3016200			816	32	767	2713	3735	3735
SAYSSYSAPVSSSLSVR	Unmodified	1746.8424	0.84244331	32	P02548	yes	yes	0	0	0	0	2	2	2	42.056	42.056	2	2.0062E-08	7	4898	20140904-PurClathDigest-1ug-03	153.72	149.38	486660000	297750000	92920000	95992000			817	32	768	2714;2715;2716;2717;2718;2719	3736;3737;3738;3739;3740;3741;3742	3742
SDISPLTPR	Unmodified	984.52401	0.52400971	22	F1N1S2	yes	yes	0	0	0	0	1	1	1	39.042	39.042	2	0.00025343	3	4351	20140904-PurClathDigest-1ug-02	169.09	128.36	15485000	9665100	3274200	2545800			818	22	769	2720;2721;2722	3743;3744;3745	3744
SDLEMQYETLQEELMALKK	2 Oxidation (M)	2330.1022	0.10216475	3	CON__P35527	yes	yes	0	0	2	1			1	51.688	51.688	3	0.00025418	1	7205	20140904-PurClathDigest-1ug-03	140.89	139.26	5753900	0	0	5753900		+	819	3	770	2723	3746	3746		12;13
SDTLQITDLGAPGVR	Unmodified	1541.8049	0.80493559	13	F1MEW3	yes	yes	0	0	0	0	1	1	1	45.892	45.892	2	3.2066E-10	3	5778	20140904-PurClathDigest-1ug-03	169.04	165.96	35918000	0	17160000	18758000			820	13	771	2724;2725;2726	3747;3748;3749	3749
SDVLETVVLINPSDEAVSTEVR	Unmodified	2371.2118	0.21184985	22	F1N1S2	yes	yes	0	0	0	0			1	51.587	51.587	2	0.053546	1	7187	20140904-PurClathDigest-1ug-03	52.451	50.755	9440700	0	0	9440700			821	22	772	2727	3750	3750
SEITELRR	Unmodified	1002.5458	0.54580778	2	CON__P13645;P06394;A6QNZ7;CON__P02535-1	yes	no	0	0	0	1	2	2	2	34.746	34.746	2;3	0.0023289	6	3181	20140904-PurClathDigest-1ug-03	183.65	88.042	22223000	11643000	5057200	5523000		+	822	2	773	2728;2729;2730;2731;2732;2733	3751;3752;3753;3754;3755;3756	3755
SEKEQLQVLNDR	Unmodified	1457.7474	0.74742071	19	F1MSQ6	yes	yes	0	0	0	1	2	2	2	37.839	37.839	2;3	1.1105E-18	6	3870	20140904-PurClathDigest-1ug-03	272.54	195.36	232380000	147650000	52820000	31909000			823	19	774	2734;2735;2736;2737;2738;2739	3757;3758;3759;3760;3761;3762	3762
SEPQDFQEADSWGDTK	Unmodified	1838.7595	0.75950154	29	G3MYP5	yes	yes	0	0	0	0	1		1	42.53	42.53	2	1.3119E-05	2	4945	20140904-PurClathDigest-1ug-03	135.47	130.41	34308000	21959000	0	12349000			824	29	775	2740;2741	3763;3764	3764
SEQDQAENEGEDSAVLMER	Oxidation (M)	2151.8862	0.88623497	48	Q3SYW6	yes	yes	0	0	1	0	1			38.356	38.356	2	0.0016029	1	4622	20140904-PurClathDigest-1ug-01	97.271	95.653	7486500	7486500	0	0			825	48	776	2742	3765	3765		183
SFPSYYTSHVQEEQIEVEETIEAAK	Unmodified	2913.3556	0.35561356	32	P02548	yes	yes	0	0	0	0	1	1	1	50.533	50.533	2	2.8962E-08	4	6978	20140904-PurClathDigest-1ug-03	119.76	114.75	75025000	22320000	31408000	21297000			826	32	777	2743;2744;2745	3766;3767;3768;3769	3769
SFPSYYTSHVQEEQIEVEETIEAAKAEEAK	Unmodified	3441.61	0.60999034	32	P02548	yes	yes	0	0	0	1		1		49.85	49.85	3	0.015241	1	7040	20140904-PurClathDigest-1ug-02	71.299	69.782	5164200	0	5164200	0			827	32	778	2746	3770	3770
SGGGGGGGLGSGGSIR	Unmodified	1231.5905	0.59052614	3	CON__P35527	yes	yes	0	0	0	0	1	1	1	34.389	34.389	2	3.177E-08	4	3270	20140904-PurClathDigest-1ug-02	164.63	121.33	56147000	31966000	11914000	12268000		+	828	3	779	2747;2748;2749	3771;3772;3773;3774	3772
SGPFGQIFRPDNFVFGQSGAGNNWAK	Unmodified	2797.3361	0.33609636	47;8;45;49	Q2KJD0;Q3MHM5;E1BJB1;Q6B856;G3X7R7;G3N1W7;Q3ZBU7	no	no	0	0	0	1	1	1		52.153	52.153	2	0.023599	2	7607	20140904-PurClathDigest-1ug-02	74.123	72.556	10175000	5454100	4720600	0			829	45;47;8;49	780	2750;2751	3775;3776	3776
SGSHGYDMSTFIR	Oxidation (M)	1472.6354	0.63542742	15	F1MGT4	yes	yes	0	0	1	0	1	1		38.087	38.087	2	0.0049955	2	4149	20140904-PurClathDigest-1ug-02	109.6	108.45	21270000	14764000	6505500	0			830	15	781	2752;2753	3777;3778	3778		66
SIELESVR	Unmodified	931.49746	0.4974606	12	F1MDZ2;O77788	yes	no	0	0	0	0	1	1	1	39.924	39.924	2	0.00061181	3	4928	20140904-PurClathDigest-1ug-01	167.24	34.126	210540000	116490000	55340000	38713000			831	12	782	2754;2755;2756	3779;3780;3781	3779
SIMTEQLETIPKEEK	Oxidation (M)	1790.8972	0.897181	13	F1MEW3	yes	yes	0	0	1	1	2	2	2	39.121	39.12	2;3	2.4033E-11	6	4365	20140904-PurClathDigest-1ug-02	204.23	190.44	351230000	160200000	106300000	84726000			832	13	783	2757;2758;2759;2760;2761;2762	3782;3783;3784;3785;3786;3787	3785		62
SIQPGSDYYELSDTR	Unmodified	1729.7795	0.7795087	13	F1MEW3	yes	yes	0	0	0	0	1	1	1	42.543	42.543	2	4.4806E-05	3	5194	20140904-PurClathDigest-1ug-02	130.72	87.687	235500000	114860000	66532000	54107000			833	13	784	2763;2764;2765	3788;3789;3790	3789
SISISVAR	Unmodified	831.48142	0.48141661	1	CON__P04264	yes	yes	0	0	0	0		1		39.183	39.183	2	0.034254	1	4364	20140904-PurClathDigest-1ug-02	87.181	5.8	7178800	0	7178800	0		+	834	1	785	2766	3791	3791
SIVHPSYNSNTLNNDIMLIK	Oxidation (M)	2288.1471	0.14708153	31	P00760	yes	yes	0	0	1	0	2	2	2	45.377	45.377	2;3	2.0796E-05	6	5694	20140904-PurClathDigest-1ug-03	117.48	114.73	172940000	83832000	42604000	46508000			835	31	786	2767;2768;2769;2770;2771;2772	3792;3793;3794;3795;3796;3797	3797		116
SIVHPSYNSNTLNNDIMLIK	Deamidation (NQ)	2273.1362	0.13618249	31	P00760	yes	yes	0	1	0	0	3	4	5	47.077	47.077	2;3	3.48E-12	12	6541	20140904-PurClathDigest-1ug-01	175.85	172.7	200880000	87294000	61772000	51813000			836	31	786	2773;2774;2775;2776;2777;2778;2779;2780;2781;2782;2783;2784	3798;3799;3800;3801;3802;3803;3804;3805;3806;3807;3808;3809	3799	14;15;16
SIVHPSYNSNTLNNDIMLIK	Unmodified	2272.1522	0.15216691	31	P00760	yes	yes	0	0	0	0	2	2	2	46.63	46.63	2;3	8.1252E-22	13	6261	20140904-PurClathDigest-1ug-02	214.55	199.11	859520000	388610000	245360000	225550000			837	31	786	2785;2786;2787;2788;2789;2790	3810;3811;3812;3813;3814;3815;3816;3817;3818;3819;3820;3821;3822	3817
SKAEAESLYQSK	Unmodified	1339.662	0.66195975	1	CON__P04264	yes	yes	0	0	0	1	2	2	1	33.918	33.918	2;3	6.7661E-08	5	2990	20140904-PurClathDigest-1ug-03	214.48	182.76	92996000	54026000	23286000	15684000		+	838	1	787	2791;2792;2793;2794;2795	3823;3824;3825;3826;3827	3827
SKEEAEALYHSK	Unmodified	1390.6729	0.67285879	4	CON__P35908	yes	yes	0	0	0	1	1		1	32.957	32.957	2	1.2655E-06	2	2795	20140904-PurClathDigest-1ug-03	169.79	125.9	5401200	4112500	0	1288700		+	839	4	788	2796;2797	3828;3829	3829
SKEEAEALYHSKYEELQVTVGR	Unmodified	2565.2711	0.27109607	4	CON__P35908	yes	yes	0	0	0	2	2	2	2	41.633	41.633	3;4	1.2275E-09	6	4989	20140904-PurClathDigest-1ug-02	165.38	164.59	58090000	28289000	14080000	15721000		+	840	4	789	2798;2799;2800;2801;2802;2803	3830;3831;3832;3833;3834;3835	3833
SKFADLNDAAAR	Unmodified	1277.6364	0.6364137	43	Q28115	yes	yes	0	0	0	1	2	2	2	36.905	36.905	2;3	3.9782E-07	6	3666	20140904-PurClathDigest-1ug-03	193.28	180.78	21841000	10336000	5427400	6077500			841	43	790	2804;2805;2806;2807;2808;2809	3836;3837;3838;3839;3840;3841	3841
SKFANLNEQAAR	Unmodified	1347.6895	0.6895119	40	Q08DH7	yes	yes	0	0	0	1	2	1	2	34.718	34.718	2;3	9.9947E-07	5	3622	20140904-PurClathDigest-1ug-01	177.1	141.42	23188000	13305000	3554700	6329100			842	40	791	2810;2811;2812;2813;2814	3842;3843;3844;3845;3846	3842
SKIGSTDNIK	Unmodified	1061.5717	0.57168818	13	F1MEW3	yes	yes	0	0	0	1		1		31.513	31.513	2	0.0037602	1	2591	20140904-PurClathDigest-1ug-02	119.03	58.861	1584500	0	1584500	0			843	13	792	2815	3847	3847
SKPSAASPKPGALK	Unmodified	1337.7667	0.76669959	22	F1N1S2	yes	yes	0	0	0	2	1	1	1	30.817	30.817	3	0.010089	3	2686	20140904-PurClathDigest-1ug-01	93.243	91.336	21352000	12207000	5927600	3217400			844	22	793	2816;2817;2818	3848;3849;3850	3848
SLDFLIELLHKDQLDETVNVEPLTK	Unmodified	2908.5434	0.54335475	16	F1MIC9	yes	yes	0	0	0	1	1	1	1	55.192	55.192	3	0.00010851	3	8908	20140904-PurClathDigest-1ug-01	92.886	92.791	12716000	6403900	3301700	3009900			845	16	794	2819;2820;2821	3851;3852;3853	3851
SLDLDSIIAEVK	Unmodified	1301.7078	0.70784731	1	CON__P04264	no	no	0	0	0	0	1	1	1	53.427	53.427	2	0.00012286	3	7610	20140904-PurClathDigest-1ug-03	129.34	70.644	56185000	32916000	11315000	11954000		+	846	1	795	2822;2823;2824	3854;3855;3856	3856
SLEETGSPATAK	Unmodified	1189.5826	0.5826468	13	F1MEW3	yes	yes	0	0	0	0	1	1	1	33.241	33.241	2	0.00297	6	3238	20140904-PurClathDigest-1ug-01	105.65	74.052	137580000	79599000	26743000	31235000			847	13	796	2825;2826;2827	3857;3858;3859;3860;3861;3862	3857
SLEGEAAALR	Unmodified	1015.5298	0.52982336	19	F1MSQ6	yes	yes	0	0	0	0	1	1	1	40.934	40.934	2	0.00029866	3	5194	20140904-PurClathDigest-1ug-01	134.23	75.247	120150000	70454000	25244000	24453000			848	19	797	2828;2829;2830	3863;3864;3865	3863
SLLEGEGSSGGGGR	Unmodified	1261.5899	0.58985744	2	CON__P13645	yes	yes	0	0	0	0	1	1	1	36.709	36.709	2	1.1053E-07	3	3613	20140904-PurClathDigest-1ug-03	164.13	150.04	19133000	10098000	4614700	4421000		+	849	2	798	2831;2832;2833	3866;3867;3868	3868
SLNNQFASFIDK	Unmodified	1382.683	0.68302954	1	CON__P04264	no	no	0	0	0	0		1	1	48.242	48.242	2	0.00012797	2	6363	20140904-PurClathDigest-1ug-03	126.83	113.43	27121000	0	13654000	13467000		+	850	1	799	2834;2835	3869;3870	3870
SLNNQFASFIDKVR	Unmodified	1637.8526	0.85255449	1	CON__P04264	no	no	0	0	0	1	2	2	1	49.334	49.334	2;3	9.8504E-13	5	7459	20140904-PurClathDigest-1ug-01	220.4	203.87	58703000	35577000	13780000	9346400		+	851	1	800	2836;2837;2838;2839;2840	3871;3872;3873;3874;3875	3872
SLQQLAEER	Unmodified	1072.5513	0.55128709	7	E1BFB0	yes	yes	0	0	0	0	1		1	40.079	40.079	2	0.00035885	2	4411	20140904-PurClathDigest-1ug-03	157.96	91.657	35252000	30732000	0	4519500			852	7	801	2841;2842	3876;3877	3877
SLSLSEESPSK	Unmodified	1162.5717	0.57174776	29;24	F1N3M8;G3MYP5	no	no	0	0	0	0	1	1	1	37.388	37.388	2	5.3932E-06	3	3936	20140904-PurClathDigest-1ug-02	149.96	116.6	34261000	20096000	7748100	6416300			853	24;29	802	2843;2844;2845	3878;3879;3880	3879
SLSLSEESPSKETSLDISSK	Unmodified	2123.0481	0.048138569	29;24	F1N3M8;G3MYP5	no	no	0	0	0	1	2	2	2	40.961	40.961	2;3	4.7686E-29	6	4823	20140904-PurClathDigest-1ug-02	277.1	267.84	77364000	23194000	31533000	22637000			854	24;29	803	2846;2847;2848;2849;2850;2851	3881;3882;3883;3884;3885;3886	3883
SNAHYNLQNAFNLAEQHLGLTK	Unmodified	2482.2353	0.23531968	20	F1MYC9	yes	yes	0	0	0	0			1	50.354	50.354	3	3.2687E-10	1	6886	20140904-PurClathDigest-1ug-03	140.12	139.25	3267400	0	0	3267400			855	20	804	2852	3887	3887
SNEKEQLQGLNDR	Unmodified	1529.7434	0.74339797	12	F1MDZ2	yes	yes	0	0	0	1	2	2	2	34.808	34.808	2;3	1.448E-13	8	3617	20140904-PurClathDigest-1ug-01	234.9	197.96	434940000	217170000	104700000	113060000			856	12	805	2853;2854;2855;2856;2857;2858	3888;3889;3890;3891;3892;3893;3894;3895	3888
SNEKEQLQGLNDR	Deamidation (NQ)	1530.7274	0.72741355	12	F1MDZ2	yes	yes	0	1	0	1	2	1	1	35.484	35.484	2	6.0371E-44	4	3421	20140904-PurClathDigest-1ug-02	266.75	221.47	13889000	12178000	0	1710700			857	12	805	2859;2860;2861;2862	3896;3897;3898;3899	3898	6
SNHEEEVADLLAQIQASHITVER	Unmodified	2588.2831	0.28305774	12	F1MDZ2;O77788	yes	no	0	0	0	0	3	3	3	50.021	50.021	2;3;4	1.4826E-34	12	7058	20140904-PurClathDigest-1ug-02	232.11	231.35	961180000	603960000	200330000	156890000			858	12	806	2863;2864;2865;2866;2867;2868;2869;2870;2871	3900;3901;3902;3903;3904;3905;3906;3907;3908;3909;3910;3911	3904
SNHEEEVADLLAQIQASHITVERK	Unmodified	2716.378	0.37802076	12	F1MDZ2;O77788	yes	no	0	0	0	1	1	1	2	48.156	48.156	3;4	5.4037E-09	5	6357	20140904-PurClathDigest-1ug-03	142.32	142.17	147860000	81565000	28024000	38268000			859	12	807	2872;2873;2874;2875	3912;3913;3914;3915;3916	3914
SNIEETTISSQK	Unmodified	1335.6518	0.65178899	40	Q08DH7	yes	yes	0	0	0	0	1	1	1	35.812	35.812	2	0.00020995	3	3590	20140904-PurClathDigest-1ug-02	118.87	98.078	29981000	14084000	7699200	8197700			860	40	808	2876;2877;2878	3917;3918;3919	3918
SNIEETTISSQKI	Unmodified	1448.7359	0.73585297	40	Q08DH7	yes	yes	0	0	0	1	1	1	1	40.861	40.861	2	2.2792E-05	3	4548	20140904-PurClathDigest-1ug-03	139.48	86.9	236880000	108470000	75199000	53209000			861	40	809	2879;2880;2881	3920;3921;3922	3922
SPASDGLDLSQAAAR	Unmodified	1457.711	0.71103521	40	Q08DH7	yes	yes	0	0	0	0	2	2	2	40.687	40.687	2	1.2081E-30	7	4452	20140904-PurClathDigest-1ug-03	303.3	271.42	302420000	176230000	69960000	56231000			862	40	810	2882;2883;2884;2885;2886;2887	3923;3924;3925;3926;3927;3928;3929	3928
SPEDGGYAYEITEK	Unmodified	1557.6835	0.68348305	22	F1N1S2	yes	yes	0	0	0	0	1	1	1	41.093	41.093	2	3.8336E-16	3	4888	20140904-PurClathDigest-1ug-02	144.8	141.61	10050000	4755800	0	5293900			863	22	811	2888;2889;2890	3930;3931;3932	3931
SPEESGYAYEISEK	Unmodified	1587.694	0.69404774	22	F1N1S2	yes	yes	0	0	0	0		1		40.402	40.402	2	8.6731E-05	1	4668	20140904-PurClathDigest-1ug-02	118.51	113.79	6807900	0	6807900	0			864	22	812	2891	3933	3933
SPESLPSPAVEDIVMEWEGK	Oxidation (M)	2215.0355	0.035465393	29	G3MYP5	yes	yes	0	0	1	0	1	1	1	55.013	55.013	2	5.1522E-05	4	8262	20140904-PurClathDigest-1ug-02	104.84	103.43	18166000	11497000	3648000	3021100			865	29	813	2892;2893;2894	3934;3935;3936;3937	3935		113
SPESLPSPAVEDIVMEWEGKVPK	Oxidation (M)	2539.2516	0.25160618	29	G3MYP5	yes	yes	0	0	1	1	1	1	1	54.094	54.094	3	0.007058	3	7801	20140904-PurClathDigest-1ug-03	89.663	88.904	13411000	7140000	3233200	3037800			866	29	814	2895;2896;2897	3938;3939;3940	3940		113
SPPTSASVSTVIDGPTHILVR	Unmodified	2133.143	0.14298243	9	E1BKN2	yes	yes	0	0	0	0	2	1	1	45.563	45.563	2;3	4.4113E-18	7	6462	20140904-PurClathDigest-1ug-01	192.18	167.39	134710000	64579000	35227000	34901000			867	9	815	2898;2899;2900;2901	3941;3942;3943;3944;3945;3946;3947	3943
SPPYEDFSVTGESEK	Unmodified	1670.7312	0.73116153	29;24	F1N3M8;G3MYP5	no	no	0	0	0	0	1	1	1	43.029	43.029	2	2.5873E-11	3	5778	20140904-PurClathDigest-1ug-01	176.4	173.54	73461000	42953000	17643000	12865000			868	24;29	816	2902;2903;2904	3948;3949;3950	3948
SPPYEDFSVTGESEKR	Unmodified	1826.8323	0.83227255	29;24	F1N3M8;G3MYP5	no	no	0	0	0	1			1	41.021	41.021	3	1.9448E-08	1	4598	20140904-PurClathDigest-1ug-03	150.39	149.7	5607500	0	0	5607500			869	24;29	817	2905	3951	3951
SPQAQEVSISIAGGQAGR	Unmodified	1754.8911	0.89112484	29	G3MYP5	yes	yes	0	0	0	0	1	1	1	40.932	40.932	2	1.6127E-21	3	4578	20140904-PurClathDigest-1ug-03	205.12	156.65	65180000	35618000	15411000	14151000			870	29	818	2906;2907;2908	3952;3953;3954	3954
SPSLSPSPPSPIEK	Unmodified	1421.7402	0.74021007	22	F1N1S2	yes	yes	0	0	0	0	1	1	1	39.409	39.409	2	1.748E-07	3	4870	20140904-PurClathDigest-1ug-01	139.86	124.06	12633000	7334400	3249600	2048700			871	22	819	2909;2910;2911	3955;3956;3957	3955
SPVEEVKPK	Unmodified	1011.5601	0.56006086	12	F1MDZ2;O77788	yes	no	0	0	0	1	2	2	2	31.764	31.764	2;3	0.0002129	6	2502	20140904-PurClathDigest-1ug-03	150.66	98.792	48766000	27404000	11551000	9810600			872	12	820	2912;2913;2914;2915;2916;2917	3958;3959;3960;3961;3962;3963	3963
SPVKEEEKPQEVR	Unmodified	1553.8049	0.80493559	19	F1MSQ6	yes	yes	0	0	0	2	3	2	2	31.022	31.022	2;3;4	1.9935E-10	7	2461	20140904-PurClathDigest-1ug-02	246.86	186.7	93221000	57340000	23224000	12657000			873	19	821	2918;2919;2920;2921;2922;2923;2924	3964;3965;3966;3967;3968;3969;3970	3967
SQLESHSDQNMHQAEEWFK	Oxidation (M)	2345.9971	0.99712283	12	F1MDZ2;O77788	yes	no	0	0	1	0	3	3	2	39.902	39.902	2;3;4	8.6157E-09	10	4353	20140904-PurClathDigest-1ug-03	120.56	119.38	432150000	223340000	113070000	95739000			874	12	822	2925;2926;2927;2928;2929;2930;2931;2932	3971;3972;3973;3974;3975;3976;3977;3978;3979;3980	3979		54
SQLESHSDQNMHQAEEWFK	Oxidation (M);Deamidation (NQ)	2346.9811	0.98113841	12	F1MDZ2;O77788	yes	no	0	1	1	0	2	1	1	40.693	40.693	2;3	1.1676E-08	4	4557	20140904-PurClathDigest-1ug-03	107.78	107.6	82891000	42257000	21298000	19336000			875	12	822	2933;2934;2935;2936	3981;3982;3983;3984	3984	7;59	54
SQLLGSAHEVQR	Unmodified	1323.6895	0.6895119	7	E1BFB0	yes	yes	0	0	0	0	2	2	2	34.92	34.92	2;3	4.6462E-09	6	3674	20140904-PurClathDigest-1ug-01	207.88	135.68	62132000	35392000	14117000	12623000			876	7	823	2937;2938;2939;2940;2941;2942	3985;3986;3987;3988;3989;3990	3985
SQNIITDSSLNAEAIR	Unmodified	1730.8799	0.87989145	20	F1MYC9	yes	yes	0	0	0	0	1	1		44.086	44.086	2	5.9582E-08	2	5614	20140904-PurClathDigest-1ug-02	136.34	127.06	17605000	12978000	4626900	0			877	20	824	2943;2944	3991;3992	3992
SQSWSR	Unmodified	749.34565	0.34565141	12	F1MDZ2;O77788	yes	no	0	0	0	0	1	1		32.753	32.753	2	0.011349	2	2896	20140904-PurClathDigest-1ug-02	114.19	89.554	15468000	9793200	5675200	0			878	12	825	2945;2946	3993;3994	3994
SQYEQLAEQNR	Unmodified	1364.6321	0.6320566	2	CON__P13645	yes	yes	0	0	0	0	1	1	1	36.879	36.879	2	4.5677E-18	3	3630	20140904-PurClathDigest-1ug-03	251.43	217.17	13313000	6920700	4172500	2219300		+	879	2	826	2947;2948;2949	3995;3996;3997	3997
SQYEQLAEQNRK	Unmodified	1492.727	0.72701962	2	CON__P13645	yes	yes	0	0	0	1	1	1	1	34.41	34.41	2	1.6451E-08	3	3538	20140904-PurClathDigest-1ug-01	220.45	211.75	123310000	71747000	29132000	22434000		+	880	2	827	2950;2951;2952	3998;3999;4000	3998
SSFSYEPYYSTSYKR	Acetyl (Protein N-term)	1905.8421	0.84210896	32	P02548	yes	yes	1	0	0	1		1	1	45.051	45.051	2	0.00038544	2	5820	20140904-PurClathDigest-1ug-02	148.52	135.73	28235000	0	14096000	14139000			881	32	828	2953;2954	4001;4002	4001
SSGTSYPDVLK	Unmodified	1152.5663	0.56626845	31	P00760	yes	yes	0	0	0	0	1	1	1	40.376	40.376	2	0.00011993	9	4638	20140904-PurClathDigest-1ug-02	136.5	110.38	1637000000	923830000	376400000	336780000			882	31	829	2955;2956;2957	4003;4004;4005;4006;4007;4008;4009;4010;4011	4006
SSHLPTEVIEKPAAVPVSFEFSDAKDESER	Unmodified	3300.615	0.61501614	22	F1N1S2	yes	yes	0	0	0	2	1			44.253	44.253	3	0.021754	1	6180	20140904-PurClathDigest-1ug-01	76.002	75.999	19560000	19560000	0	0			883	22	830	2958	4012	4012
SSITSTAFVTGGR	Unmodified	1282.6517	0.65172941	9	E1BKN2	yes	yes	0	0	0	0	1	1	1	41.301	41.301	2	1.3596E-06	3	4902	20140904-PurClathDigest-1ug-02	134.56	125.82	38055000	13563000	14808000	9684300			884	9	831	2959;2960;2961	4013;4014;4015	4014
SSLSSAQADFNQLAELDR	Unmodified	1950.9283	0.92829821	7	E1BFB0	yes	yes	0	0	0	0	1	1	1	49.922	49.922	2	3.6623E-09	3	6829	20140904-PurClathDigest-1ug-03	153.21	146.78	45129000	23281000	9699100	12149000			885	7	832	2962;2963;2964	4016;4017;4018	4018
SSYYVVSGNDPAAEEPSR	Unmodified	1926.8595	0.85954994	22	F1N1S2	yes	yes	0	0	0	0		1	1	40.191	40.191	2	1.4142E-06	2	4591	20140904-PurClathDigest-1ug-02	126.84	124.04	91456000	0	44873000	46583000			886	22	833	2965;2966	4019;4020	4019
STAGDTHLGGEDFDNR	Unmodified	1690.7183	0.71830543	36	P19120	yes	yes	0	0	0	0	2	2	2	37.02	37.02	2;3	4.0054E-17	6	4235	20140904-PurClathDigest-1ug-01	236.43	230.72	120590000	65033000	33809000	21749000			887	36	834	2967;2968;2969;2970;2971;2972	4021;4022;4023;4024;4025;4026	4021
STDDSDPPTEEAR	Unmodified	1418.5797	0.57974626	29;24	F1N3M8;G3MYP5	no	no	0	0	0	0	1	1	1	31.965	31.965	2	3.0791E-07	3	2947	20140904-PurClathDigest-1ug-01	170.18	169.19	23413000	10584000	7182700	5646100			888	24;29	835	2973;2974;2975	4027;4028;4029	4027
STDFIPIKEDFGQEK	Unmodified	1752.857	0.85703074	22	F1N1S2	yes	yes	0	0	0	1	1	1	1	44.705	44.705	2	7.7623E-05	3	5780	20140904-PurClathDigest-1ug-02	125.36	121.01	36981000	18980000	10503000	7498400			889	22	836	2976;2977;2978	4030;4031;4032	4031
STLEPVEK	Unmodified	901.47566	0.47566253	42	Q27975;Q27965	no	no	0	0	0	0		1		34.441	34.441	2	0.0065231	1	3253	20140904-PurClathDigest-1ug-02	120.15	68.809	2557000	0	2557000	0			890	42	837	2979	4033	4033
STMQELNSR	Oxidation (M)	1080.487	0.48697227	3	CON__P35527	yes	yes	0	0	1	0	1	1	1	31.513	31.513	2	0.00085948	3	2441	20140904-PurClathDigest-1ug-03	166.09	127.31	20100000	10356000	5944400	3800100		+	891	3	838	2980;2981;2982	4034;4035;4036	4036		14
STPSQVTPAEEKDGHSPMSK	Oxidation (M)	2127.9743	0.97426212	29;24	F1N3M8;G3MYP5	no	no	0	0	1	1	2	1	1	31.277	31.277	2;3	0.031318	4	2779	20140904-PurClathDigest-1ug-01	65.598	63.375	91140000	56004000	21728000	13408000			892	24;29	839	2983;2984;2985;2986	4037;4038;4039;4040	4037		109
SVDPTLALSVYLR	Unmodified	1432.7926	0.79257999	38	P49951;F1MPU0	yes	no	0	0	0	0	3	5	4	55.284	55.284	2	1.7895E-09	31	7004	20140904-PurClathDigest-1ug-03	193.15	186.02	1382300000	633300000	375540000	373480000			893	38	840	2987;2988;2989;2990;2991;2992;2993;2994;2995;2996;2997;2998	4041;4042;4043;4044;4045;4046;4047;4048;4049;4050;4051;4052;4053;4054;4055;4056;4057;4058;4059;4060;4061;4062;4063;4064;4065;4066;4067;4068;4069;4070;4071	4060
SVGNTIDPVILFQK	Unmodified	1529.8453	0.84534384	22	F1N1S2	yes	yes	0	0	0	0	1	1	1	50.523	50.523	2	0.00012545	3	6965	20140904-PurClathDigest-1ug-03	110.14	99.493	49361000	23720000	13040000	12601000			894	22	841	2999;3000;3001	4072;4073;4074	4074
SVLISLK	Unmodified	758.49019	0.49019038	33	P04973	yes	yes	0	0	0	0	1	1	1	42.569	42.569	2	0.042322	8	5616	20140904-PurClathDigest-1ug-01	83.753	14.577	626660000	340890000	147870000	137910000			895	33	842	3002;3003;3004	4075;4076;4077;4078;4079;4080;4081;4082	4075
SVLMSLK	Oxidation (M)	792.44153	0.44152563	30	P04975;G3N252	yes	no	0	0	1	0	1	1	1	39.204	39.204	1	0.019653	3	4867	20140904-PurClathDigest-1ug-01	73.616	16.726	322520000	188400000	79088000	55036000			896	30	843	3005;3006;3007	4083;4084;4085	4083		114
SVLMSLK	Unmodified	776.44661	0.44661101	30	P04975;G3N252	yes	no	0	0	0	0		1	1	41.936	41.936	2	0.058432	2	4804	20140904-PurClathDigest-1ug-03	75.109	25.751	20068000	0	11237000	8831400			897	30	843	3008;3009	4086;4087	4087
SVLQAVQK	Unmodified	871.51272	0.51271674	11	E1BP30;Q1LZ76	yes	no	0	0	0	0	1	1	1	35.004	35.004	2	0.036387	3	3707	20140904-PurClathDigest-1ug-01	85.212	47.653	8719300	4978000	1807600	1933700			898	11	844	3010;3011;3012	4088;4089;4090	4088
SVLVSAGNVK	Unmodified	972.5604	0.56039521	6	E1BDX8	yes	yes	0	0	0	0	1	1		36.998	36.998	2	0.0098823	2	3880	20140904-PurClathDigest-1ug-02	95.775	41.617	4481800	2931000	1550800	0			899	6	845	3013;3014	4091;4092	4092
SVNESLNNLFITEEDYQALR	Deamidation (NQ)	2355.123	0.12303485	38	P49951;F1MPU0	yes	no	0	1	0	0	4	4	3	51.918	51.918	2;3	1.0013E-12	25	7300	20140904-PurClathDigest-1ug-02	173.21	170.49	675720000	320670000	181810000	173240000			900	38	846	3015;3016;3017;3018;3019;3020;3021;3022;3023;3024;3025	4093;4094;4095;4096;4097;4098;4099;4100;4101;4102;4103;4104;4105;4106;4107;4108;4109;4110;4111;4112;4113;4114;4115;4116;4117	4103	45;46;47
SVNESLNNLFITEEDYQALR	Unmodified	2354.139	0.13901926	38	P49951;F1MPU0	yes	no	0	0	0	0	4	3	3	53.226	53.226	2;3	9.104E-18	27	8224	20140904-PurClathDigest-1ug-01	182.82	181.75	3975200000	1686100000	1200000000	1089100000			901	38	846	3026;3027;3028;3029;3030;3031;3032;3033;3034;3035	4118;4119;4120;4121;4122;4123;4124;4125;4126;4127;4128;4129;4130;4131;4132;4133;4134;4135;4136;4137;4138;4139;4140;4141;4142;4143;4144	4119
SVNFSLTPNEIK	Unmodified	1347.7034	0.70343063	22	F1N1S2	yes	yes	0	0	0	0	1	1	1	45.126	45.126	2	6.1759E-05	3	5876	20140904-PurClathDigest-1ug-02	125.03	105.84	21515000	10228000	6653200	4634300			902	22	847	3036;3037;3038	4145;4146;4147	4146
SVQNHNNK	Unmodified	939.45224	0.45224175	38	P49951;F1MPU0	yes	no	0	0	0	0	1			20.625	20.625	2	0.061284	1	1615	20140904-PurClathDigest-1ug-01	46.426	43.034	0	0	0	0			903	38	848	3039	4148	4148
SVSEGHLK	Unmodified	855.44503	0.4450311	43	Q28115	yes	yes	0	0	0	0	1		1	30.661	30.661	2	0.034876	2	2253	20140904-PurClathDigest-1ug-03	62.969	38.759	13696000	13696000	0	0			904	43	849	3040;3041	4149;4150	4150
SVSEGHLKR	Unmodified	1011.5461	0.54614213	43	Q28115	yes	yes	0	0	0	1	1		1	30.347	30.347	3	0.0041479	2	2177	20140904-PurClathDigest-1ug-03	101.72	90.128	17119000	12261000	0	4857800			905	43	850	3042;3043	4151;4152	4152
SVTVTQKVEEHEETFEEK	Unmodified	2148.0223	0.02225817	12	F1MDZ2;O77788	yes	no	0	0	0	1	3	3	3	38.169	38.169	2;3;4	2.8229E-22	13	3933	20140904-PurClathDigest-1ug-03	251.13	243.03	491760000	253960000	147250000	90542000			906	12	851	3044;3045;3046;3047;3048;3049;3050;3051;3052	4153;4154;4155;4156;4157;4158;4159;4160;4161;4162;4163;4164;4165	4164
SWLADIPPWVPK	Unmodified	1407.7551	0.75507227	29	G3MYP5	yes	yes	0	0	0	0	1	1	1	54.994	54.994	2	0.0045031	3	8222	20140904-PurClathDigest-1ug-02	93.623	90.245	18024000	11026000	3657300	3340400			907	29	852	3053;3054;3055	4166;4167;4168	4167
SYELPDGQVITIGNER	Unmodified	1789.8846	0.88464248	39	P63258;P60712;F1MRD0	no	no	0	0	0	0	1	1	1	48.381	48.381	2	7.6243E-05	3	6418	20140904-PurClathDigest-1ug-03	106.38	102.4	56201000	33026000	13050000	10125000			908	39	853	3056;3057;3058	4169;4170;4171	4171
SYVSSSEMVVGGR	Oxidation (M)	1372.6293	0.62927941	43	Q28115	yes	yes	0	0	1	0	1	1	1	38.451	38.451	2	0.0077608	5	3988	20140904-PurClathDigest-1ug-03	102.87	89.472	75283000	43915000	17475000	13893000			909	43	854	3059;3060;3061	4172;4173;4174;4175;4176	4175		175
TAAENDFVTLK	Unmodified	1207.6085	0.60846762	4	CON__P35908	yes	yes	0	0	0	0			1	41.94	41.94	2	0.0070385	1	4806	20140904-PurClathDigest-1ug-03	95.498	85.31	2534400	0	0	2534400		+	910	4	855	3062	4177	4177
TAAENDFVTLKK	Unmodified	1335.7034	0.70343063	4	CON__P35908	yes	yes	0	0	0	1	2	2	1	38.508	38.508	2;3	4.9607E-05	5	4595	20140904-PurClathDigest-1ug-01	130.56	118.98	44465000	27137000	13431000	3897400		+	911	4	856	3063;3064;3065;3066;3067	4178;4179;4180;4181;4182	4178
TAASGIPYHSEVPVSLK	Unmodified	1754.9203	0.9202997	20	F1MYC9	yes	yes	0	0	0	0			1	41.576	41.576	3	0.048132	1	4724	20140904-PurClathDigest-1ug-03	34.202	31.389	4364700	0	0	4364700			912	20	857	3068	4183	4183
TADLDFFR	Unmodified	983.47125	0.47124585	29;24	F1N3M8;G3MYP5	no	no	0	0	0	0	1	1		48.051	48.051	2	0.0010294	2	6627	20140904-PurClathDigest-1ug-02	141.39	95.373	9918500	6131100	3787500	0			913	24;29	858	3069;3070	4184;4185	4185
TALPAQSAATLPAR	Unmodified	1366.7569	0.75686319	20	F1MYC9	yes	yes	0	0	0	0	1	1	1	38.965	38.965	2	3.4253E-06	3	4129	20140904-PurClathDigest-1ug-03	142.1	137.4	51035000	29885000	14683000	6466800			914	20	859	3071;3072;3073	4186;4187;4188	4188
TATDEAYKDPSNLQGK	Unmodified	1736.8217	0.82170787	7	E1BFB0	yes	yes	0	0	0	1	1	1	1	34.791	34.791	2	1.1763E-17	3	3653	20140904-PurClathDigest-1ug-01	248.81	245.89	24996000	13031000	6494300	5470600			915	7	860	3074;3075;3076	4189;4190;4191	4189
TDISTALK	Unmodified	847.4651	0.46509784	12	F1MDZ2;O77788	yes	no	0	0	0	0	1	1	1	37.813	37.813	2	0.0095228	3	3857	20140904-PurClathDigest-1ug-03	99.442	58.012	217580000	134710000	53747000	29118000			916	12	861	3077;3078;3079	4192;4193;4194	4194
TEAQAKEPGKEASTPGK	Unmodified	1727.869	0.86899241	19	F1MSQ6	yes	yes	0	0	0	2	1			30.38	30.38	3	0.00053409	1	2573	20140904-PurClathDigest-1ug-01	112.82	108.6	11265000	11265000	0	0			917	19	862	3080	4195	4195
TEATQGLDYVPSAGTISPTSSLEEDKGFK	Unmodified	3027.4561	0.45605588	29;24	F1N3M8;G3MYP5	no	no	0	0	0	1		1		45.671	45.671	3	0.05901	1	5981	20140904-PurClathDigest-1ug-02	36.777	36.749	13380000	0	13380000	0			918	24;29	863	3081	4196	4196
TELDSPR	Unmodified	816.39775	0.39774656	9	E1BKN2	yes	yes	0	0	0	0	1	1	1	32.711	32.711	2	0.005189	3	3139	20140904-PurClathDigest-1ug-01	134.66	77.2	14859000	7954000	4065100	2839900			919	9	864	3082;3083;3084	4197;4198;4199	4197
TEPSLVVPDIGLPAEPTAAK	Unmodified	2004.0779	0.077922555	13	F1MEW3	yes	yes	0	0	0	0	1	1	1	49.701	49.701	2	0.0018319	3	6733	20140904-PurClathDigest-1ug-03	77.031	75.622	188880000	105520000	35400000	47959000			920	13	865	3085;3086;3087	4200;4201;4202	4202
TESSEALKAEK	Unmodified	1191.5983	0.59829686	29;24	F1N3M8;G3MYP5	no	no	0	0	0	1	1			31.22	31.22	2	6.3937E-05	1	2789	20140904-PurClathDigest-1ug-01	155.24	118.09	2106200	2106200	0	0			921	24;29	866	3088	4203	4203
TEYLSNADER	Unmodified	1196.5309	0.53094558	6	E1BDX8	yes	yes	0	0	0	0	1			35.801	35.801	2	0.00015276	1	3965	20140904-PurClathDigest-1ug-01	146.11	126.08	2683800	2683800	0	0			922	6	867	3089	4204	4204
TGAEGAVLDEAK	Unmodified	1159.5721	0.57208211	28	F6RAG5;F1N1G7;F1MZB0	yes	no	0	0	0	0	1		1	37.504	37.504	2	0.00021625	2	4373	20140904-PurClathDigest-1ug-01	122.39	110.75	10663000	8536600	0	2126400			923	28	868	3090;3091	4205;4206	4205
TGIVLANGK	Unmodified	871.51272	0.51271674	29;24	F1N3M8;G3MYP5	no	no	0	0	0	0	1	1		36.724	36.724	2	0.023429	2	4162	20140904-PurClathDigest-1ug-01	90.64	17.38	7264400	4365100	2899300	0			924	24;29	869	3092;3093	4207;4208	4207
THINAVVAK	Unmodified	951.55016	0.55016488	11	E1BP30;Q1LZ76	yes	no	0	0	0	0	1	1		32.118	32.118	2	0.00050063	2	2750	20140904-PurClathDigest-1ug-02	113.1	83.322	12711000	9715900	2995300	0			925	11	870	3094;3095	4209;4210	4210
THNLEPYFESFINNLR	Unmodified	1992.9694	0.96937516	1	CON__P04264	yes	yes	0	0	0	0	2	2	2	53.911	53.911	2;3	4.0432E-08	11	7966	20140904-PurClathDigest-1ug-02	144.38	114.8	57102000	30634000	15506000	10962000		+	926	1	871	3096;3097;3098;3099;3100;3101	4211;4212;4213;4214;4215;4216;4217;4218;4219;4220;4221	4216
THNLEPYFESFINNLRR	Unmodified	2149.0705	0.070486187	1	CON__P04264	yes	yes	0	0	0	1	1	1		51.863	51.863	3	1.0279E-05	2	7543	20140904-PurClathDigest-1ug-02	115.8	113.7	12831000	9392700	3438300	0		+	927	1	872	3102;3103	4222;4223	4223
TIDDLKNQILNLTTDNANILLQIDNAR	Unmodified	3051.62	0.62004194	2	CON__P13645	yes	yes	0	0	0	1	1	1		57.831	57.831	3	0.051132	2	9538	20140904-PurClathDigest-1ug-01	40.625	40.56	12101000	7548500	4552300	0		+	928	2	873	3104;3105	4224;4225	4224
TIEIEGLR	Unmodified	929.5182	0.51819605	40	Q08DH7	yes	yes	0	0	0	0	1	1	1	42.66	42.66	2	0.00089043	3	5238	20140904-PurClathDigest-1ug-02	155.75	97.149	111550000	59698000	24448000	27403000			929	40	874	3106;3107;3108	4226;4227;4228	4227
TIGGGDDSFNTFFSETGAGK	Unmodified	2006.8858	0.88576469	44	Q2HJ86;F2Z4C1;F6RP72;F2Z4K0;Q32KN8;Q3ZCJ7;F1MNF8	no	no	0	0	0	0	1	1	1	49.996	49.996	2	0.0039214	3	6832	20140904-PurClathDigest-1ug-03	70.094	69.628	72987000	35056000	16584000	21347000			930	44	875	3109;3110;3111	4229;4230;4231	4231
TIQLLPEQDK	Unmodified	1183.6449	0.64485312	29;24	F1N3M8;G3MYP5	no	no	0	0	0	0	1	1	2	42.711	42.711	1;2	7.4405E-05	4	5246	20140904-PurClathDigest-1ug-02	160.77	136.78	52343000	22781000	11968000	17594000			931	24;29	876	3112;3113;3114;3115	4232;4233;4234;4235	4233
TIRPMDIETIEGSVMK	2 Oxidation (M)	1850.9118	0.9117852	35	P11966	yes	yes	0	0	2	1		1		42.438	42.438	3	0.057382	1	5176	20140904-PurClathDigest-1ug-02	59.673	53.266	5079900	0	5079900	0			932	35	877	3116	4236	4236		127;128
TKVEAPK	Unmodified	771.44905	0.44905385	12	F1MDZ2;O77788	yes	no	0	0	0	1	1	1	1	30.369	30.369	2	0.0091773	3	2188	20140904-PurClathDigest-1ug-03	128.61	94.505	25562000	15408000	6171000	3983300			933	12	878	3117;3118;3119	4237;4238;4239	4239
TLFSNIVLSGGSTLFK	Unmodified	1682.9243	0.92432245	27	F2Z4F0	yes	yes	0	0	0	0	1	1	1	56.074	56.074	2	5.8741E-08	3	8204	20140904-PurClathDigest-1ug-03	147.64	139.07	12732000	8253400	3354000	1124600			934	27	879	3120;3121;3122	4240;4241;4242	4242
TLLDIDNTR	Unmodified	1059.556	0.55603811	3	CON__P35527	yes	yes	0	0	0	0	1	1	1	42.693	42.693	2	9.9393E-05	3	5022	20140904-PurClathDigest-1ug-03	185.6	145.24	27951000	12123000	7149200	8678800		+	935	3	880	3123;3124;3125	4243;4244;4245	4245
TLLEGEESR	Unmodified	1032.5088	0.50875357	1	CON__P04264	no	no	0	0	0	0	1	1	1	37.048	37.048	2	0.00039478	3	3867	20140904-PurClathDigest-1ug-02	155.84	37.954	61382000	32487000	17795000	11100000		+	936	1	881	3126;3127;3128	4246;4247;4248	4247
TLQIFNIEMK	Oxidation (M);Deamidation (NQ)	1252.6373	0.6373249	38	P49951;F1MPU0	yes	no	0	1	1	0	2		2	47.599	47.599	2	0.012932	4	6797	20140904-PurClathDigest-1ug-01	84.882	78.847	18013000	14465000	0	3548300			937	38	882	3129;3130;3131;3132	4249;4250;4251;4252	4249	48;67	158
TLQIFNIEMK	Unmodified	1235.6584	0.6583947	38	P49951;F1MPU0	yes	no	0	0	0	0	1	1	1	50.722	50.722	2	0.0010029	4	7788	20140904-PurClathDigest-1ug-01	114.89	87.122	210240000	79877000	66208000	64157000			938	38	882	3133;3134;3135	4253;4254;4255;4256	4253
TLQIFNIEMK	Oxidation (M)	1251.6533	0.65330932	38	P49951;F1MPU0	yes	no	0	0	1	0	1	1	1	47.52	47.52	2	0.01113	3	7252	20140904-PurClathDigest-1ug-01	81.017	40.289	2087300000	925830000	568290000	593170000			939	38	882	3136;3137;3138	4257;4258;4259	4257		158
TNAENEFVTIK	Unmodified	1264.6299	0.62993134	1	CON__P04264	yes	yes	0	0	0	0	1	1	1	41.634	41.634	2	8.8942E-06	3	4754	20140904-PurClathDigest-1ug-03	143.22	105.62	63664000	34824000	13383000	15457000		+	940	1	883	3139;3140;3141	4260;4261;4262	4262
TNAENEFVTIKK	Unmodified	1392.7249	0.72489436	1	CON__P04264	yes	yes	0	0	0	1	2	2	2	38.205	38.205	2;3	1.5337E-07	6	4509	20140904-PurClathDigest-1ug-01	166.45	163.37	125790000	69298000	33380000	23115000		+	941	1	884	3142;3143;3144;3145;3146;3147	4263;4264;4265;4266;4267;4268	4264
TNEKEQLQGLNDR	Unmodified	1543.759	0.75904803	40	Q08DH7	yes	yes	0	0	0	1	2	2	2	34.957	34.957	2;3	1.9548E-26	7	3397	20140904-PurClathDigest-1ug-02	299.64	275.23	498230000	321730000	80509000	95988000			942	40	885	3148;3149;3150;3151;3152;3153	4269;4270;4271;4272;4273;4274;4275	4272
TNEKEQLQGLNDR	Deamidation (NQ)	1544.7431	0.74306362	40	Q08DH7	yes	yes	0	1	0	1		1		35.276	35.276	2	1.7865E-44	1	3453	20140904-PurClathDigest-1ug-02	289.44	256.22	0	0	0	0			943	40	885	3154	4276	4276	54
TPAFAESVTEGDVR	Unmodified	1477.7049	0.7048872	34	P11179;F1MEQ3	yes	no	0	0	0	0	1			41.607	41.607	2	0.00015558	1	5469	20140904-PurClathDigest-1ug-01	89.624	80.087	0	0	0	0			944	34	886	3155	4277	4277
TPDTIR	Unmodified	701.3708	0.37080353	38	P49951;F1MPU0	yes	no	0	0	0	0	1	1	1	31.819	31.819	2	0.0034349	5	2536	20140904-PurClathDigest-1ug-03	166.22	62.525	1054200000	555050000	297480000	201720000			945	38	887	3156;3157;3158	4278;4279;4280;4281;4282	4282
TPDTIRR	Unmodified	857.47191	0.47191456	38	P49951;F1MPU0	yes	no	0	0	0	1	1	1		30.716	30.716	2	0.04087	2	2452	20140904-PurClathDigest-1ug-02	123.45	71.182	253270000	164490000	88777000	0			946	38	888	3159;3160	4283;4284	4284
TPDVSGYYYEK	Unmodified	1320.5874	0.58739782	22	F1N1S2	yes	yes	0	0	0	0		1	1	40.339	40.339	2	0.00013522	2	4417	20140904-PurClathDigest-1ug-03	135.15	121.97	8381300	0	4986500	3394800			947	22	889	3161;3162	4285;4286	4286
TPEVSAYSYEK	Unmodified	1272.5874	0.58739782	22	F1N1S2	yes	yes	0	0	0	0	1	1	1	38.335	38.335	2	4.419E-06	3	3995	20140904-PurClathDigest-1ug-03	153.34	120.28	14576000	7704400	3772900	3098300			948	22	890	3163;3164;3165	4287;4288;4289	4289
TPGDFSYAYEKPETTTR	Unmodified	1961.9007	0.90068647	22	F1N1S2	yes	yes	0	0	0	1	1	1	1	39.949	39.949	3	2.2073E-08	3	4589	20140904-PurClathDigest-1ug-02	149.73	148.9	26358000	12813000	5773300	7771500			949	22	891	3166;3167;3168	4290;4291;4292	4291
TPHTPGTPK	Unmodified	934.48723	0.48723027	13	F1MEW3	yes	yes	0	0	0	0	2	2	2	30.59	30.59	2;3	0.00018683	6	2359	20140904-PurClathDigest-1ug-02	144.77	126.55	81386000	46824000	20240000	14322000			950	13	892	3169;3170;3171;3172;3173;3174	4293;4294;4295;4296;4297;4298	4295
TPPKSPATPK	Unmodified	1022.576	0.57604528	13	F1MEW3	yes	yes	0	0	0	1	1	1	1	30.555	30.555	3	0.0020065	3	2220	20140904-PurClathDigest-1ug-03	120.77	100.07	14499000	8205600	3600400	2692600			951	13	893	3175;3176;3177	4299;4300;4301	4301
TPVEAASSDQSSEATKAPGLR	Unmodified	2101.0287	0.028740531	11	E1BP30;F1MQZ0	yes	no	0	0	0	1	1			35.596	35.596	3	5.3765E-09	1	3916	20140904-PurClathDigest-1ug-01	150.69	144.72	4063300	4063300	0	0			952	11	894	3178	4302	4302
TPVIDADKPVSSQLR	Unmodified	1624.8784	0.87843489	6	E1BDX8	yes	yes	0	0	0	1	1	2	2	38.827	38.827	2;3	2.938E-11	5	4101	20140904-PurClathDigest-1ug-03	207.31	204.65	24550000	13474000	6443000	4632500			953	6	895	3179;3180;3181;3182;3183	4303;4304;4305;4306;4307	4307
TPVSITEHPK	Unmodified	1107.5924	0.59242362	6	E1BDX8	yes	yes	0	0	0	0			1	33.627	33.627	3	0.017812	1	2900	20140904-PurClathDigest-1ug-03	63.694	54.372	2023000	0	0	2023000			954	6	896	3184	4308	4308
TQETPSAQMEGFLNR	Oxidation (M)	1723.7835	0.78354822	20	F1MYC9	yes	yes	0	0	1	0	1	1	1	40.238	40.238	2	0.00017724	3	4420	20140904-PurClathDigest-1ug-03	123.72	116.48	34342000	20081000	7892000	6369100			955	20	897	3185;3186;3187	4309;4310;4311	4311		85
TQILAASYELHK	Unmodified	1372.7351	0.73506511	20	F1MYC9	yes	yes	0	0	0	0	1	1	1	40.638	40.638	2	6.3873E-05	3	4751	20140904-PurClathDigest-1ug-02	134.18	62.03	26424000	14839000	6369800	5215000			956	20	898	3188;3189;3190	4312;4313;4314	4313
TQTAIASEDMPNTLTEAEK	Oxidation (M)	2064.9521	0.95212969	20	F1MYC9	yes	yes	0	0	1	0			1	39.004	39.004	2	0.00047108	1	4094	20140904-PurClathDigest-1ug-03	97.621	95.357	11000000	0	0	11000000			957	20	899	3191	4315	4315		86
TQYEAVASSNMHEAEEWYR	Oxidation (M)	2315.9753	0.97532475	43	Q28115	yes	yes	0	0	1	0	2	2	2	41.47	41.47	2;3	1.4877E-13	11	4685	20140904-PurClathDigest-1ug-03	184.83	178.46	272750000	136920000	63263000	72561000			958	43	900	3192;3193;3194;3195;3196;3197	4316;4317;4318;4319;4320;4321;4322;4323;4324;4325;4326	4325		176
TQYEAVASSNMHEAEEWYR	Oxidation (M);Deamidation (NQ)	2316.9593	0.95934034	43	Q28115	yes	yes	0	1	1	0	1	1		42.905	42.905	3	2.759E-05	2	5773	20140904-PurClathDigest-1ug-01	106.75	104.03	17858000	11856000	6002600	0			959	43	900	3198;3199	4327;4328	4327	57	176
TRVMEYINR	Oxidation (M)	1196.5972	0.59719142	38	P49951;F1MPU0	yes	no	0	0	1	1	2	2	2	34.448	34.448	2;3	0.0098598	9	3091	20140904-PurClathDigest-1ug-03	108.47	65.387	1111500000	675480000	239330000	196640000			960	38	901	3200;3201;3202;3203;3204;3205	4329;4330;4331;4332;4333;4334;4335;4336;4337	4335		159
TSIDAYDNFDNISLAQR	Unmodified	1941.9068	0.90683448	38	P49951;F1MPU0	yes	no	0	0	0	0	5	5	5	47.097	47.097	2;3	2.0561E-11	25	6265	20140904-PurClathDigest-1ug-03	162.29	153.03	4451400000	2004400000	1110900000	1336000000			961	38	902	3206;3207;3208;3209;3210;3211;3212;3213;3214;3215;3216;3217;3218;3219;3220	4338;4339;4340;4341;4342;4343;4344;4345;4346;4347;4348;4349;4350;4351;4352;4353;4354;4355;4356;4357;4358;4359;4360;4361;4362	4362
TSIDAYDNFDNISLAQR	Deamidation (NQ)	1942.8909	0.89085007	38	P49951;F1MPU0	yes	no	0	1	0	0			1	48.656	48.656	2	0.052464	1	6668	20140904-PurClathDigest-1ug-03	51.495	50.181	51768000	0	0	51768000			962	38	902	3221	4363	4363	49
TSIDAYDNFDNISLAQRLEK	Unmodified	2312.1285	0.12845458	38	P49951;F1MPU0	yes	no	0	0	0	1	1	2	2	47.848	47.848	2;3	1.2714E-11	5	6559	20140904-PurClathDigest-1ug-02	167.97	146.5	33678000	13431000	9541500	10706000			963	38	903	3222;3223;3224;3225;3226	4364;4365;4366;4367;4368	4366
TSIDAYDNFDNISLAQRLEKHELIEFR	Unmodified	3236.6102	0.61020554	38	P49951;F1MPU0	yes	no	0	0	0	2	1	1	1	49.65	49.65	4	0.010935	3	6986	20140904-PurClathDigest-1ug-02	85.185	84.775	45528000	24150000	10476000	10902000			964	38	904	3227;3228;3229	4369;4370;4371	4370
TSLQELGEPQKEEVLQIPDR	Unmodified	2308.1911	0.19105483	29;24	F1N3M8;G3MYP5	no	no	0	0	0	1	2	2	2	44.873	44.873	2;3	7.8925E-35	7	6246	20140904-PurClathDigest-1ug-01	270.08	267.19	177370000	99434000	38606000	39331000			965	24;29	905	3230;3231;3232;3233;3234;3235	4372;4373;4374;4375;4376;4377;4378	4374
TSQNSELNNMQDLVEDYKK	Oxidation (M)	2271.0325	0.03250528	4	CON__P35908	yes	yes	0	0	1	1	1	1	1	39.213	39.213	3	0.00020242	4	4367	20140904-PurClathDigest-1ug-02	96.805	89.169	42370000	20319000	9995400	12055000		+	966	4	906	3236;3237;3238	4379;4380;4381;4382	4380		16
TSQNSELNNMQDLVEDYKK	Unmodified	2255.0376	0.037590658	4	CON__P35908	yes	yes	0	0	0	1			1	46	46	3	1.1467E-09	1	5822	20140904-PurClathDigest-1ug-03	156.13	150.8	4465100	0	0	4465100		+	967	4	906	3239	4383	4383
TSVSSVSASPSR	Unmodified	1163.5782	0.57823012	19	F1MSQ6	yes	yes	0	0	0	0	1	1	1	32.697	32.697	2	1.4133E-07	3	2694	20140904-PurClathDigest-1ug-03	197.07	189.79	121380000	59182000	35865000	26334000			968	19	907	3240;3241;3242	4384;4385;4386	4386
TTAAGAESAQAPSVFK	Unmodified	1534.7627	0.76273643	13	F1MEW3	yes	yes	0	0	0	0	1	1	1	39.653	39.653	2	6.2355E-08	3	4499	20140904-PurClathDigest-1ug-02	150.37	147.8	114050000	54896000	35636000	23520000			969	13	908	3243;3244;3245	4387;4388;4389	4388
TTELETLK	Unmodified	933.50188	0.50187728	19	F1MSQ6	yes	yes	0	0	0	0	1	1	1	37.908	37.908	2	0.0015251	3	4070	20140904-PurClathDigest-1ug-02	122.52	58.096	132490000	76662000	32614000	23214000			970	19	909	3246;3247;3248	4390;4391;4392	4391
TTGIVMDSGDGVTHTVPIYEGYALPHAILR	Oxidation (M)	3198.6019	0.60194904	39	P63258;P60712;F1MRD0	yes	no	0	0	1	0	1		1	47.725	47.725	3	0.004115	2	6274	20140904-PurClathDigest-1ug-03	80.02	79.686	43259000	30208000	0	13051000			971	39	910	3249;3250	4393;4394	4394		167
TTMLLSK	Oxidation (M)	808.43644	0.43644025	41	Q0P5A1	yes	yes	0	0	1	0	1			34.486	34.486	2	0.054309	1	3645	20140904-PurClathDigest-1ug-01	49.423	25.655	1573200	1573200	0	0			972	41	911	3251	4395	4395		168
TTPSYVAFTDTER	Unmodified	1486.694	0.69398816	36;42	Q27975;Q27965;P0CB32;P19120	no	no	0	0	0	0	1	1	1	42.93	42.93	2	4.3123E-07	4	5106	20140904-PurClathDigest-1ug-03	163.51	152.14	61716000	34777000	15761000	11179000			973	42;36	912	3252;3253;3254	4396;4397;4398;4399	4399
TTSGTPPDSSLVTYELHSRPEQDKFSQAAK	Unmodified	3276.5899	0.58986402	50	Q3ZCF0	yes	yes	0	0	0	2	1			41.264	41.264	5	0.050172	1	5365	20140904-PurClathDigest-1ug-01	117.83	117.47	22860000	22860000	0	0			974	50	913	3255	4400	4400
TVEMRDGEVIK	Oxidation (M)	1291.6442	0.6442012	43	Q28115	yes	yes	0	0	1	1	1	1	1	32.469	32.469	2	0.026747	3	3076	20140904-PurClathDigest-1ug-01	85.554	57.271	13413000	8774600	2759700	1878900			975	43	914	3256;3257;3258	4401;4402;4403	4401		177
TVENIKDPLFR	Unmodified	1330.7245	0.72450043	6	E1BDX8	yes	yes	0	0	0	1	1		1	41.959	41.959	3	0.00010626	2	5508	20140904-PurClathDigest-1ug-01	136.02	118.36	7487900	4734100	0	2753800			976	6	915	3259;3260	4404;4405	4404
TVTNAVVTVPAYFNDSQR	Unmodified	1980.9905	0.99050453	36	P19120	yes	yes	0	0	0	0			1	46.419	46.419	2	0.0011674	1	5918	20140904-PurClathDigest-1ug-03	74.732	70.982	11578000	0	0	11578000			977	36	916	3261	4406	4406
TWEDTSPEQEDTYWR	Unmodified	1941.8017	0.80170071	29;24	F1N3M8;G3MYP5	no	no	0	0	0	0	1	1	1	45.511	45.511	2	2.2139E-12	3	5990	20140904-PurClathDigest-1ug-02	183.81	183.3	44270000	18025000	13978000	12266000			978	24;29	917	3262;3263;3264	4407;4408;4409	4408
VAANAPK	Unmodified	669.38097	0.38097428	38	P49951;F1MPU0	yes	no	0	0	0	0	1	1	1	30.336	30.336	2	0.028981	3	2306	20140904-PurClathDigest-1ug-02	92.692	33.052	98463000	45698000	29002000	23763000			979	38	918	3265;3266;3267	4410;4411;4412	4411
VADEAFYK	Unmodified	941.44945	0.44944778	33	P04973	yes	yes	0	0	0	0	1	2	1	38.289	38.289	2	0.0067055	10	4154	20140904-PurClathDigest-1ug-02	106.04	59.616	839360000	432290000	241980000	165090000			980	33	919	3268;3269;3270;3271	4413;4414;4415;4416;4417;4418;4419;4420;4421;4422	4417
VAELEEEQSQGSSSYSDWVK	Unmodified	2257.0023	0.0022510091	29;24	F1N3M8;G3MYP5	no	no	0	0	0	0	1	1	1	44.565	44.565	2	1.4259E-05	3	6169	20140904-PurClathDigest-1ug-01	106.75	106.06	32346000	14433000	8819400	9093200			981	24;29	920	3272;3273;3274	4423;4424;4425	4423
VANVELYYR	Unmodified	1125.5819	0.58185893	38	P49951;F1MPU0	yes	no	0	0	0	0	1	1	1	41.923	41.923	2	0.00010879	17	5560	20140904-PurClathDigest-1ug-01	169.12	119.02	1679000000	857560000	451450000	369990000			982	38	921	3275;3276;3277	4426;4427;4428;4429;4430;4431;4432;4433;4434;4435;4436;4437;4438;4439;4440;4441;4442	4428
VAPEEHPVLLTEAPLNPK	Unmodified	1953.0571	0.057127534	39	P63258;P60712;F1MRD0	yes	no	0	0	0	0	2	2	2	43.119	43.119	2;3	1.6677E-06	6	5789	20140904-PurClathDigest-1ug-01	126.07	122.93	224470000	140500000	52021000	31948000			983	39	922	3278;3279;3280;3281;3282;3283	4443;4444;4445;4446;4447;4448	4443
VASNPYTWFTMEALEETWR	Oxidation (M)	2346.0627	0.062683196	7	E1BFB0	yes	yes	0	0	1	0	1	1		57.636	57.636	2	0.0010949	2	9491	20140904-PurClathDigest-1ug-01	96.391	93.896	4905100	3748700	1156300	0			984	7	923	3284;3285	4449;4450	4449		40
VATHLSTPQGLR	Unmodified	1278.7044	0.70443369	9	E1BKN2	yes	yes	0	0	0	0	2	2	2	36.487	36.487	2;3	7.2514E-07	6	3750	20140904-PurClathDigest-1ug-02	177.04	134.7	76660000	44799000	16506000	15356000			985	9	924	3286;3287;3288;3289;3290;3291	4451;4452;4453;4454;4455;4456	4454
VAVVNQIAR	Unmodified	968.57671	0.57671398	20	F1MYC9	yes	yes	0	0	0	0		1	1	37.596	37.596	2	0.0013715	2	3982	20140904-PurClathDigest-1ug-02	120.46	90.79	5809500	0	2977000	2832500			986	20	925	3292;3293	4457;4458	4457
VDFSLAGALNSGFK	Deamidation (NQ)	1425.714	0.71399532	43	Q28115	yes	yes	0	1	0	0	2	2	2	51.618	51.618	2	0.00034703	6	7773	20140904-PurClathDigest-1ug-01	139.3	132.82	33887000	14244000	11364000	8278600			987	43	926	3294;3295;3296;3297;3298;3299	4459;4460;4461;4462;4463;4464	4459	58
VDFSLAGALNSGFK	Unmodified	1424.73	0.72997974	43	Q28115	yes	yes	0	0	0	0	1	1	1	51.713	51.713	2	1.7771E-10	3	7218	20140904-PurClathDigest-1ug-03	185.95	170.96	93263000	44207000	26354000	22703000			988	43	926	3300;3301;3302	4465;4466;4467	4467
VDHGAEIITQSPGR	Unmodified	1478.7478	0.74775506	13	F1MEW3	yes	yes	0	0	0	0	2	2	2	35.868	35.868	2;3	6.5733E-13	8	3910	20140904-PurClathDigest-1ug-01	226.06	214.85	113870000	51109000	36905000	25858000			989	13	927	3303;3304;3305;3306;3307;3308	4468;4469;4470;4471;4472;4473;4474;4475	4468
VDKLDASESLR	Unmodified	1231.6408	0.64083038	38	P49951;F1MPU0	yes	no	0	0	0	1	2	2	3	36.377	36.377	2;3	1.562E-06	50	3529	20140904-PurClathDigest-1ug-03	176.18	120.14	2469000000	1109500000	839330000	520150000			990	38	928	3309;3310;3311;3312;3313;3314;3315	4476;4477;4478;4479;4480;4481;4482;4483;4484;4485;4486;4487;4488;4489;4490;4491;4492;4493;4494;4495;4496;4497;4498;4499;4500;4501;4502;4503;4504;4505;4506;4507;4508;4509;4510;4511;4512;4513;4514;4515;4516;4517;4518;4519;4520;4521;4522;4523;4524;4525	4511
VDKLDASESLRK	Unmodified	1359.7358	0.73579339	38	P49951;F1MPU0	yes	no	0	0	0	2	3	3	3	33.598	33.598	2;3;4	6.0236E-06	9	3328	20140904-PurClathDigest-1ug-01	174.89	163.52	578020000	351920000	120090000	106010000			991	38	929	3316;3317;3318;3319;3320;3321;3322;3323;3324	4526;4527;4528;4529;4530;4531;4532;4533;4534	4526
VDLLNQEIEFLK	Unmodified	1459.7922	0.79224564	4	CON__P35908	yes	yes	0	0	0	0	1	1	1	52.747	52.747	2	2.6515E-06	3	7465	20140904-PurClathDigest-1ug-03	148.96	136.8	54992000	28567000	12623000	13802000		+	992	4	930	3325;3326;3327	4535;4536;4537	4537
VDLQAK	Unmodified	672.38064	0.38063993	1	CON__P04264	no	no	0	0	0	0		1		32.671	32.671	2	0.05615	1	2864	20140904-PurClathDigest-1ug-02	77.748	28.39	3255000	0	3255000	0		+	993	1	931	3328	4538	4538
VDPEIQNVK	Unmodified	1040.5502	0.55022446	4	CON__P35908;E1B991;G3MZ71	no	no	0	0	0	0		1		35.93	35.93	2	0.032199	1	3603	20140904-PurClathDigest-1ug-02	79.986	49.188	8718600	0	8718600	0		+	994	4	932	3329	4539	4539
VDTVNHMADELINSGHSDAATIAEWK	Oxidation (M)	2839.3083	0.30828621	20	F1MYC9	yes	yes	0	0	1	0	1	1		45.741	45.741	3	5.3912E-09	2	6077	20140904-PurClathDigest-1ug-02	129.27	129.14	17026000	8428400	8598000	0			995	20	933	3330;3331	4540;4541	4541		87
VEEHEETFEEK	Unmodified	1404.6045	0.60450445	12	F1MDZ2;O77788	yes	no	0	0	0	0	1	1	1	33.59	33.59	2	1.0972E-12	3	3332	20140904-PurClathDigest-1ug-01	234.3	188.47	86330000	48815000	19537000	17978000			996	12	934	3332;3333;3334	4542;4543;4544	4542
VEEPQKDQPDK	Unmodified	1311.6307	0.63065962	13	F1MEW3	yes	yes	0	0	0	1	1			30.505	30.505	2	1.8162E-06	1	2613	20140904-PurClathDigest-1ug-01	169.82	129.09	4022400	4022400	0	0			997	13	935	3335	4545	4545
VEEPQKDQPDKIAEAPASEAVAAPK	Unmodified	2617.3235	0.32352557	13	F1MEW3	yes	yes	0	0	0	2	2	2	2	37.086	37.086	3;4	0.0038222	6	3683	20140904-PurClathDigest-1ug-03	108.44	102.31	138020000	91966000	26847000	19207000			998	13	936	3336;3337;3338;3339;3340;3341	4546;4547;4548;4549;4550;4551	4550
VEEVGGKEEGGLK	Unmodified	1329.6776	0.67760981	12	F1MDZ2;O77788	yes	no	0	0	0	1	1			32.943	32.943	3	0.00054182	1	3229	20140904-PurClathDigest-1ug-01	122.39	83.213	4808500	4808500	0	0			999	12	937	3342	4552	4552
VEGVGVVTSAELDMPFYEDK	Oxidation (M)	2200.0246	0.024566356	13	F1MEW3	yes	yes	0	0	1	0		1		48.666	48.666	2	0.0045585	1	6717	20140904-PurClathDigest-1ug-02	77.27	76.586	25053000	0	25053000	0			1000	13	938	3343	4553	4553		63
VEKPEK	Unmodified	728.40685	0.40685468	12	F1MDZ2;O77788	yes	no	0	0	0	1		1	1	21.045	21.045	2	0.044591	2	1478	20140904-PurClathDigest-1ug-02	88.734	21.741	64654	0	39444	25210			1001	12	939	3344;3345	4554;4555	4554
VESLLDELAFVR	Unmodified	1389.7504	0.75038083	40	Q08DH7	yes	yes	0	0	0	0	1	1	1	55.459	55.459	2	2.3664E-06	3	8988	20140904-PurClathDigest-1ug-01	153.54	123.73	16708000	9731300	3677700	3299200			1002	40	940	3346;3347;3348	4556;4557;4558	4556
VEVRPMMYVALTYDHR	2 Oxidation (M)	2010.9656	0.96555211	34	P11179;F1MEQ3	yes	no	0	0	2	1	1	1		40.466	40.466	3	0.0070499	2	5115	20140904-PurClathDigest-1ug-01	88.427	82.153	7997400	5591900	2405500	0			1003	34	941	3349;3350	4559;4560	4559		123;124
VGALDLAVLDQVEAR	Unmodified	1567.857	0.85697116	50	Q3ZCF0	yes	yes	0	0	0	0			1	51.643	51.643	2	1.0484E-07	1	7193	20140904-PurClathDigest-1ug-03	144.18	102.96	7770200	0	0	7770200			1004	50	942	3351	4561	4561
VGELFQR	Unmodified	847.4552	0.45520186	40	Q08DH7	yes	yes	0	0	0	0	1	1	1	40.514	40.514	2	0.0051299	3	4708	20140904-PurClathDigest-1ug-02	131.04	70.249	214140000	117740000	46014000	50390000			1005	40	943	3352;3353;3354	4562;4563;4564	4563
VGEQAQVVIIDMNDPSNPIR	Oxidation (M)	2210.1001	0.10013134	38	P49951;F1MPU0	yes	no	0	0	1	0	1	1	2	44.702	44.702	2;3	5.6065E-05	37	5970	20140904-PurClathDigest-1ug-02	107.06	105.65	3321900000	1356200000	925590000	1040200000			1006	38	944	3355;3356;3357;3358	4565;4566;4567;4568;4569;4570;4571;4572;4573;4574;4575;4576;4577;4578;4579;4580;4581;4582;4583;4584;4585;4586;4587;4588;4589;4590;4591;4592;4593;4594;4595;4596;4597;4598;4599;4600;4601	4584		145
VGEQAQVVIIDMNDPSNPIR	Unmodified	2194.1052	0.10521671	38	P49951;F1MPU0	yes	no	0	0	0	0	1	1	1	48.655	48.655	2	4.2094E-06	9	7354	20140904-PurClathDigest-1ug-01	117.37	113.27	138780000	64401000	45695000	28684000			1007	38	944	3359;3360;3361	4602;4603;4604;4605;4606;4607;4608;4609;4610	4604
VGEQAQVVIIDMNDPSNPIRR	Oxidation (M)	2366.2012	0.20124236	38	P49951;F1MPU0	yes	no	0	0	1	1	1	1	1	41.951	41.951	3	0.020824	3	5042	20140904-PurClathDigest-1ug-02	67.928	66.17	48503000	23896000	13518000	11089000			1008	38	945	3362;3363;3364	4611;4612;4613	4612		145
VGFGNLEDEFWLGLDNIHR	Unmodified	2230.0807	0.080716522	9	E1BKN2	yes	yes	0	0	0	0	1	1	1	56.766	56.766	3	2.5507E-18	3	8274	20140904-PurClathDigest-1ug-03	194.05	185.95	42616000	24340000	12019000	6256800			1009	9	946	3365;3366;3367	4614;4615;4616	4616
VGINYQPPTVVPGGDLAK	Unmodified	1823.9781	0.97814893	44	Q2HJ86;F2Z4C1;F6RP72;F2Z4K0;Q32KN8;Q3ZCJ7;F1MNF8	no	no	0	0	0	0			1	45.243	45.243	2	0.056776	1	5617	20140904-PurClathDigest-1ug-03	54.764	50.239	41133000	0	0	41133000			1010	44	947	3368	4617	4617
VGSLDNAHHVPGGGNVK	Unmodified	1656.8332	0.83321603	13	F1MEW3	yes	yes	0	0	0	0	3	3	3	33.041	33.041	2;3;4	2.7816E-17	9	3206	20140904-PurClathDigest-1ug-01	241.64	217.19	293500000	210030000	47533000	35931000			1011	13	948	3369;3370;3371;3372;3373;3374;3375;3376;3377	4618;4619;4620;4621;4622;4623;4624;4625;4626	4620
VGYTPDWIFLLR	Unmodified	1478.7922	0.79218606	38	P49951;F1MPU0	yes	no	0	0	0	0	1	1	1	57.718	57.718	2	5.2297E-09	11	8706	20140904-PurClathDigest-1ug-02	202.03	187.43	315640000	219350000	76706000	19578000			1012	38	949	3378;3379;3380	4627;4628;4629;4630;4631;4632;4633;4634;4635;4636;4637	4632
VHELEQQNK	Unmodified	1123.5622	0.56218613	32	P02548	yes	yes	0	0	0	0	2	2	2	30.623	30.623	2;3	3.6951E-05	7	2617	20140904-PurClathDigest-1ug-01	195.48	158.9	318650000	166760000	93139000	58751000			1013	32	950	3381;3382;3383;3384;3385;3386	4638;4639;4640;4641;4642;4643;4644	4638
VHLENMGSHDIVDGNHR	Oxidation (M)	1944.8861	0.88605623	20	F1MYC9;F1MKE9;E1BMN5	yes	no	0	0	1	0	2	1	1	33.182	33.182	3;4	8.9472E-07	4	3259	20140904-PurClathDigest-1ug-01	133.87	112.9	23180000	17540000	3056900	2583400			1014	20	951	3387;3388;3389;3390	4645;4646;4647;4648	4645		88
VHQLYETIQR	Unmodified	1285.6779	0.67788459	50	Q3ZCF0	yes	yes	0	0	0	0	2	2	2	37.419	37.419	2;3	3.9539E-05	6	3956	20140904-PurClathDigest-1ug-02	176.33	137.54	27273000	14935000	7172300	5165700			1015	50	952	3391;3392;3393;3394;3395;3396	4649;4650;4651;4652;4653;4654	4651
VHYLEQQNK	Unmodified	1157.5829	0.58292157	12	F1MDZ2;O77788	yes	no	0	0	0	0	2	2	2	32.564	32.564	2;3	0.00023992	6	3084	20140904-PurClathDigest-1ug-01	166.09	117.09	360890000	198640000	72546000	89700000			1016	12	953	3397;3398;3399;3400;3401;3402	4655;4656;4657;4658;4659;4660	4655
VIQCFAETGQVQK	Unmodified	1449.7286	0.72859953	38	P49951;F1MPU0	yes	no	0	0	0	0		1	1	42.727	42.727	2	5.5982E-07	2	5230	20140904-PurClathDigest-1ug-02	100.22	95.153	9333900	0	0	9333900			1017	38	954	3403;3404	4661;4662	4661
VIQQSLEQEETEHK	Unmodified	1696.8268	0.82679325	23	F1N319;Q28021	yes	no	0	0	0	0	1			35.592	35.592	3	5.2557E-08	1	3908	20140904-PurClathDigest-1ug-01	139.48	134.1	4077400	4077400	0	0			1018	23	955	3405	4663	4663
VKDDIESLHDKFK	Unmodified	1572.8148	0.814772	6	E1BDX8	yes	yes	0	0	0	2	2	1	1	37.583	37.583	3;4	0.0039739	4	4004	20140904-PurClathDigest-1ug-02	103.76	93.408	29318000	20775000	5854100	2689100			1019	6	956	3406;3407;3408;3409	4664;4665;4666;4667	4666
VKDEVSAEK	Unmodified	1003.5186	0.51858998	13	F1MEW3	yes	yes	0	0	0	1	1	1	1	30.446	30.446	2	0.00068267	3	2594	20140904-PurClathDigest-1ug-01	141.1	98.757	34296000	17843000	11096000	5357300			1020	13	957	3410;3411;3412	4668;4669;4670	4668
VKIESVK	Unmodified	801.496	0.49600404	13	F1MEW3	yes	yes	0	0	0	1	1	1	1	32.118	32.118	2	0.010888	3	2718	20140904-PurClathDigest-1ug-02	113.5	35.326	19632000	10883000	4829800	3919800			1021	13	958	3413;3414;3415	4671;4672;4673	4672
VKNFLK	Unmodified	747.46431	0.46430998	38	P49951;F1MPU0	yes	no	0	0	0	1	1			34.36	34.36	2	0.046403	1	3598	20140904-PurClathDigest-1ug-01	87.582	20.205	14880000	14880000	0	0			1022	38	959	3416	4674	4674
VKQLPLVKPYLR	Unmodified	1452.9181	0.91805528	38	P49951;F1MPU0	yes	no	0	0	0	2	1			40.019	40.019	3	0.00079725	1	5046	20140904-PurClathDigest-1ug-01	133.42	121.5	13931000	13931000	0	0			1023	38	960	3417	4675	4675
VKTESSEALK	Unmodified	1090.587	0.58700389	29;24	F1N3M8;G3MYP5	no	no	0	0	0	1	2	2	2	30.927	30.927	2;3	0.00021976	6	2705	20140904-PurClathDigest-1ug-01	141.89	111.2	60194000	34507000	15500000	10187000			1024	24;29	961	3418;3419;3420;3421;3422;3423	4676;4677;4678;4679;4680;4681	4676
VKTESSEALKAEK	Unmodified	1418.7617	0.76167379	29;24	F1N3M8;G3MYP5	no	no	0	0	0	2	1	1	1	30.891	30.891	3	3.2708E-07	3	2308	20140904-PurClathDigest-1ug-03	165.64	148.43	34668000	19923000	8875700	5869300			1025	24;29	962	3424;3425;3426	4682;4683;4684	4684
VLEAELLVLR	Unmodified	1153.7071	0.70705945	32	P02548	yes	yes	0	0	0	0	1	1	1	50.836	50.836	2	0.00010553	6	7032	20140904-PurClathDigest-1ug-03	148.32	110.98	323330000	163210000	91647000	68472000			1026	32	963	3427;3428;3429	4685;4686;4687;4688;4689;4690	4690
VLETAEDIQER	Unmodified	1301.6463	0.64630969	7	E1BFB0	yes	yes	0	0	0	0	1	1	1	37.837	37.837	2	3.2392E-06	3	4050	20140904-PurClathDigest-1ug-02	159.94	113.48	33475000	18863000	8409100	6203300			1027	7	964	3430;3431;3432	4691;4692;4693	4692
VLFPGNAPQNK	Unmodified	1183.635	0.63495714	29;24	F1N3M8;G3MYP5	no	no	0	0	0	0	1	1	1	39.629	39.629	2	1.3504E-05	6	4830	20140904-PurClathDigest-1ug-01	144.77	114.21	74700000	41263000	20489000	12948000			1028	24;29	965	3433;3434;3435	4694;4695;4696;4697;4698;4699	4694
VLFPGNSTQYNILEGLEK	Unmodified	2021.047	0.046956778	22	F1N1S2	yes	yes	0	0	0	0	1	1	1	52.479	52.479	2	1.9556E-06	4	8291	20140904-PurClathDigest-1ug-01	114.96	111.53	34037000	13023000	11514000	9500000			1029	22	966	3436;3437;3438	4700;4701;4702;4703	4700
VLLTTQGVDMISK	Oxidation (M)	1419.7643	0.76431633	6	E1BDX8	yes	yes	0	0	1	0	1	1	1	42.048	42.048	2	0.0003851	3	5086	20140904-PurClathDigest-1ug-02	123.28	116.11	23911000	11302000	6545300	6063100			1030	6	967	3439;3440;3441	4704;4705;4706	4705		27
VLPAPGQESPIPDPK	Unmodified	1543.8246	0.8246084	29	G3MYP5	yes	yes	0	0	0	0	1	1	1	40.906	40.906	2	0.0010758	3	4810	20140904-PurClathDigest-1ug-02	89.136	73.703	140100000	83188000	34363000	22550000			1031	29	968	3442;3443;3444	4707;4708;4709	4708
VLRPQVTAVAQQNQGEVPEPQDMK	Oxidation (M)	2677.3494	0.34936316	6	E1BDX8	yes	yes	0	0	1	1	1	1	1	38.594	38.594	3	0.033023	3	4044	20140904-PurClathDigest-1ug-03	63.979	63.936	62377000	34203000	14642000	13532000			1032	6	969	3445;3446;3447	4710;4711;4712	4712		28
VMEQEWR	Oxidation (M)	992.43857	0.43856552	30	P04975;G3N252	yes	no	0	0	1	0	1	1	1	35.672	35.672	2	0.011481	11	3417	20140904-PurClathDigest-1ug-03	140.12	96.903	1261500000	641480000	346650000	273330000			1033	30	970	3448;3449;3450	4713;4714;4715;4716;4717;4718;4719;4720;4721;4722;4723	4721		115
VMEQEWR	Unmodified	976.44365	0.44365089	30	P04975;G3N252	yes	no	0	0	0	0	1	1	1	38.667	38.667	2	0.001015	3	4251	20140904-PurClathDigest-1ug-02	178.65	132.63	15466000	8135400	4454900	2876100			1034	30	970	3451;3452;3453	4724;4725;4726	4725
VMEYINR	Oxidation (M)	939.4484	0.44840192	38	P49951;F1MPU0	yes	no	0	0	1	0	1	1	1	34.691	34.691	2	0.015568	11	3370	20140904-PurClathDigest-1ug-02	124.89	88.318	1453800000	774460000	337510000	341870000			1035	38	971	3454;3455;3456	4727;4728;4729;4730;4731;4732;4733;4734;4735;4736;4737	4733		159
VMEYINR	Oxidation (M);Deamidation (NQ)	940.43242	0.43241751	38	P49951;F1MPU0	yes	no	0	1	1	0	1	1	1	35.462	35.462	2	0.011247	3	3341	20140904-PurClathDigest-1ug-03	99.139	63.506	22404000	12741000	4395300	5267700			1036	38	971	3457;3458;3459	4738;4739;4740	4740	50	159
VMEYINR	Unmodified	923.45349	0.4534873	38	P49951;F1MPU0	yes	no	0	0	0	0		1	1	37.94	37.94	2	0.0026805	2	3888	20140904-PurClathDigest-1ug-03	155.73	122	24306000	0	13904000	10402000			1037	38	971	3460;3461	4741;4742	4742
VMTEPTALSEK	Oxidation (M)	1220.5959	0.59585402	13	F1MEW3	yes	yes	0	0	1	0	1	1	1	35.33	35.33	2	0.020622	4	3281	20140904-PurClathDigest-1ug-03	102.4	66.083	144530000	75649000	38934000	29950000			1038	13	972	3462;3463;3464	4743;4744;4745;4746	4746		64
VNEVNQFAAK	Unmodified	1118.572	0.57202253	7	E1BFB0	yes	yes	0	0	0	0	1			36.927	36.927	2	0.00034727	1	4228	20140904-PurClathDigest-1ug-01	115.82	109.5	8176500	8176500	0	0			1039	7	973	3465	4747	4747
VNFLPEIITLSK	Unmodified	1372.7966	0.79660274	6	E1BDX8	yes	yes	0	0	0	0		1	1	54.037	54.037	2	0.016001	2	7748	20140904-PurClathDigest-1ug-03	77.644	74.199	3192200	0	1604600	1587600			1040	6	974	3466;3467	4748;4749	4749
VPLPSLSPTMQAGTIAR	Oxidation (M)	1753.9397	0.93965493	25	F1N690	yes	yes	0	0	1	0	1	1	1	44.108	44.108	2	0.00011436	3	5576	20140904-PurClathDigest-1ug-02	107.7	84.842	30236000	16431000	7964400	5840200			1041	25	975	3468;3469;3470	4750;4751;4752	4751		110
VPQIEVETHK	Unmodified	1178.6295	0.62953741	6	E1BDX8	yes	yes	0	0	0	0	1		1	36.235	36.235	3	8.7382E-05	2	4046	20140904-PurClathDigest-1ug-01	138.22	126.06	8940900	6812300	0	2128500			1042	6	976	3471;3472	4753;4754	4753
VQALEEANNDLENK	Unmodified	1585.7584	0.75837933	3	CON__P35527	yes	yes	0	0	0	0	1	1	1	39.49	39.49	2	0.0018214	3	4467	20140904-PurClathDigest-1ug-02	91.076	88.952	16180000	9417800	3720500	3041600		+	1043	3	977	3473;3474;3475	4755;4756;4757	4756
VQAVVAVAR	Unmodified	911.55525	0.55525025	20	F1MYC9	yes	yes	0	0	0	0	1			35.981	35.981	2	0.0037213	1	3982	20140904-PurClathDigest-1ug-01	114.99	62.396	2448100	2448100	0	0			1044	20	978	3476	4758	4758
VQSLQDEVAFLR	Unmodified	1403.7409	0.74087877	12	F1MDZ2;O77788	yes	no	0	0	0	0	1	1	1	48.76	48.76	2	2.1489E-07	6	6756	20140904-PurClathDigest-1ug-02	189.13	146.8	319560000	183970000	68917000	66674000			1045	12	979	3477;3478;3479	4759;4760;4761;4762;4763;4764	4761
VQVEYK	Unmodified	764.40685	0.40685468	36	P19120	no	no	0	0	0	0	1	1	1	33.879	33.879	2	0.010459	3	2981	20140904-PurClathDigest-1ug-03	103.28	22.285	19508000	10254000	4644000	4610200			1046	36	980	3480;3481;3482	4765;4766;4767	4767
VSEFLK	Unmodified	721.40104	0.40104102	15	F1MGT4;G3N2G3	yes	no	0	0	0	0			1	38.72	38.72	2	0.052678	1	4046	20140904-PurClathDigest-1ug-03	78.445	29.597	2126200	0	0	2126200			1047	15	981	3483	4768	4768
VSQPIEGHAASFAQFK	Unmodified	1715.8631	0.86311917	38	P49951;F1MPU0	yes	no	0	0	0	0	3	4	5	42.814	42.814	2;3	1.8142E-08	51	5289	20140904-PurClathDigest-1ug-01	156.11	150.86	5855000000	2427800000	2053600000	1373600000			1048	38	982	3484;3485;3486;3487;3488;3489;3490;3491;3492;3493;3494;3495	4769;4770;4771;4772;4773;4774;4775;4776;4777;4778;4779;4780;4781;4782;4783;4784;4785;4786;4787;4788;4789;4790;4791;4792;4793;4794;4795;4796;4797;4798;4799;4800;4801;4802;4803;4804;4805;4806;4807;4808;4809;4810;4811;4812;4813;4814;4815;4816;4817;4818;4819	4780
VSYRPTQVGR	Unmodified	1161.6255	0.62545508	9	E1BKN2	yes	yes	0	0	0	1	1	1	1	33.504	33.504	3	0.0041298	3	3058	20140904-PurClathDigest-1ug-02	98.04	67.476	58805000	38188000	9883300	10734000			1049	9	983	3496;3497;3498	4820;4821;4822	4821
VTDFGDKVEDPTFLNQLQSGVNR	Unmodified	2578.2663	0.26634504	6	E1BDX8	yes	yes	0	0	0	1	1		1	48.055	48.055	3	2.1127E-06	2	6358	20140904-PurClathDigest-1ug-03	110.75	109.3	14965000	9225800	0	5739100			1050	6	984	3499;3500	4823;4824	4824
VTMQNLNDR	Oxidation (M)	1105.5186	0.51860675	2	CON__P13645;CON__P02535-1;CON__A2A4G1;CON__P08779;Q148H6;CON__Q148H6;CON__Q7Z3Y7;Q0P5J4;CON__Q7Z3Z0;CON__Q7Z3Y8;Q0P5J6;CON__Q9Z2K1;CON__Q3ZAW8;CON__Q7Z3Y9	no	no	0	0	1	0	1	1	1	31.896	31.896	2	0.00099426	3	2937	20140904-PurClathDigest-1ug-01	143.03	118.2	81879000	40990000	22392000	18497000		+	1051	2	985	3501;3502;3503	4825;4826;4827	4825		7
VTMQNLNDR	Unmodified	1089.5237	0.52369213	2	CON__P13645;CON__P02535-1;CON__A2A4G1;CON__P08779;Q148H6;CON__Q148H6;CON__Q7Z3Y7;Q0P5J4;CON__Q7Z3Z0;CON__Q7Z3Y8;Q0P5J6;CON__Q9Z2K1;CON__Q3ZAW8;CON__Q7Z3Y9	no	no	0	0	0	0	1	1	1	36.499	36.499	2	0.00029139	3	4098	20140904-PurClathDigest-1ug-01	163.32	77.643	22040000	11902000	5044800	5093600		+	1052	2	985	3504;3505;3506	4828;4829;4830	4828
VTSHAIVK	Unmodified	853.50215	0.50215205	12	F1MDZ2;O77788	yes	no	0	0	0	0	1	1	1	30.803	30.803	2	0.0012457	3	2288	20140904-PurClathDigest-1ug-03	125.31	76.753	74853000	42965000	21538000	10350000			1053	12	986	3507;3508;3509	4831;4832;4833	4833
VVGAMQLYSVDR	Oxidation (M)	1352.6758	0.67583567	38	P49951;F1MPU0	yes	no	0	0	1	0	1	1	1	40.894	40.894	2	3.7224E-06	14	4779	20140904-PurClathDigest-1ug-02	167.84	143.49	1935100000	965300000	579340000	390420000			1054	38	987	3510;3511;3512	4834;4835;4836;4837;4838;4839;4840;4841;4842;4843;4844;4845;4846;4847	4840		160
VVGAMQLYSVDR	Unmodified	1336.6809	0.68092105	38	P49951;F1MPU0	yes	no	0	0	0	0	1	1	1	44.24	44.24	2	7.6661E-07	4	5612	20140904-PurClathDigest-1ug-02	184.44	171.44	172920000	103180000	38466000	31279000			1055	38	987	3513;3514;3515	4848;4849;4850;4851	4849
VVGAMQLYSVDRK	Oxidation (M)	1480.7708	0.77079869	38	P49951;F1MPU0	yes	no	0	0	1	1	3	2	2	38.214	38.214	2;3	1.6367E-07	21	4083	20140904-PurClathDigest-1ug-03	151.52	130.74	1689000000	906140000	479330000	303560000			1056	38	988	3516;3517;3518;3519;3520;3521;3522	4852;4853;4854;4855;4856;4857;4858;4859;4860;4861;4862;4863;4864;4865;4866;4867;4868;4869;4870;4871;4872	4868		160
VVGAMQLYSVDRK	Unmodified	1464.7759	0.77588407	38	P49951;F1MPU0	yes	no	0	0	0	1	2	2	2	41.024	41.024	2;3	3.3455E-07	6	4844	20140904-PurClathDigest-1ug-02	149.41	142.93	446300000	218780000	145090000	82431000			1057	38	988	3523;3524;3525;3526;3527;3528	4873;4874;4875;4876;4877;4878	4875
VVSNTIEPLTLFHK	Unmodified	1596.8875	0.88754301	29;24	F1N3M8;G3MYP5	no	no	0	0	0	0	1	2	1	47.34	47.34	2;3	0.00011096	6	6145	20140904-PurClathDigest-1ug-03	106.32	105.77	119180000	65104000	29758000	24316000			1058	24;29	989	3529;3530;3531;3532	4879;4880;4881;4882;4883;4884	4884
VVTEEVTTTTTTITEK	Unmodified	1751.904	0.90404051	17	G3N3N0;F1MQL2;G3N0C1	yes	no	0	0	0	0			1	39.829	39.829	2	0.0015335	1	4307	20140904-PurClathDigest-1ug-03	75.018	62.817	4298500	0	0	4298500			1059	17	990	3533	4885	4885
WELLQQMNVGTRPINLEPIFQGYIDSLKR	Oxidation (M)	3473.8129	0.81294486	4	CON__P35908	yes	yes	0	0	1	2	1	1	1	55.385	55.385	4	0.012834	3	8078	20140904-PurClathDigest-1ug-03	97.057	96.405	25786000	14129000	5508100	6148000		+	1060	4	991	3534;3535;3536	4886;4887;4888	4888		17
WEMAAQLR	Oxidation (M)	1019.4859	0.48585006	19	F1MSQ6	yes	yes	0	0	1	0	1		1	38.356	38.356	2	0.049326	2	3978	20140904-PurClathDigest-1ug-03	101.33	87.748	25440000	18536000	0	6904300			1061	19	993	3537;3538	4889;4890	4890		73
WISLNTVALVTDNAVYHWSMEGESQPVK	Oxidation (M)	3189.5441	0.54409981	38	P49951;F1MPU0	yes	no	0	0	1	0	2	1		56.381	56.381	3	0.015856	3	8463	20140904-PurClathDigest-1ug-02	60.172	56.554	336070000	328010000	8055600	0			1062	38	994	3539;3540;3541	4891;4892;4893	4893		161
WISLNTVALVTDNAVYHWSMEGESQPVK	Unmodified	3173.5492	0.54918518	38	P49951;F1MPU0	yes	no	0	0	0	0	1	1		57.917	57.917	3	0.0003963	2	9540	20140904-PurClathDigest-1ug-01	70.718	69.338	17591000	13909000	3682700	0			1063	38	994	3542;3543	4894;4895	4894
WISLNTVALVTDNAVYHWSMEGESQPVK	Oxidation (M);Deamidation (NQ)	3190.5281	0.52811539	38	P49951;F1MPU0	yes	no	0	1	1	0		1	1	54.533	54.533	3	0.048002	2	7914	20140904-PurClathDigest-1ug-02	41.047	40.556	41656000	0	36390000	5266000			1064	38	994	3544;3545	4896;4897	4896	51;52	161
WLAESPVGLPPEEEDKLTR	Unmodified	2165.1004	0.10044891	29	G3MYP5	yes	yes	0	0	0	1	1	1	1	45.64	45.64	3	0.0018428	3	6445	20140904-PurClathDigest-1ug-01	86.8	85.486	55844000	25147000	17771000	12926000			1065	29	995	3546;3547;3548	4898;4899;4900	4898
WLLLTGISAQQNR	Unmodified	1498.8256	0.82561145	38	P49951;F1MPU0	yes	no	0	0	0	0	7	4	4	53.309	53.309	2;3	2.4916E-18	43	7936	20140904-PurClathDigest-1ug-02	158.04	153.14	2132000000	1109200000	541530000	481290000			1066	38	996	3549;3550;3551;3552;3553;3554;3555;3556;3557;3558;3559;3560;3561;3562;3563	4901;4902;4903;4904;4905;4906;4907;4908;4909;4910;4911;4912;4913;4914;4915;4916;4917;4918;4919;4920;4921;4922;4923;4924;4925;4926;4927;4928;4929;4930;4931;4932;4933;4934;4935;4936;4937;4938;4939;4940;4941;4942;4943	4930
WQALLVQIR	Unmodified	1125.6659	0.66586334	6	E1BDX8	yes	yes	0	0	0	0	1	1	1	49.556	49.556	2	0.00048405	3	6748	20140904-PurClathDigest-1ug-03	136.75	132.45	7778600	4378900	1540400	1859300			1067	6	997	3564;3565;3566	4944;4945;4946	4946
WREEQR	Unmodified	902.43586	0.4358634	30	P04975;G3N252;F1MX40	yes	no	0	0	0	1	2	2	2	31.037	31.037	2;3	0.0025393	6	2329	20140904-PurClathDigest-1ug-03	124.89	10.22	746340000	393420000	207030000	145890000			1068	30	998	3567;3568;3569;3570;3571;3572	4947;4948;4949;4950;4951;4952	4952
WREEQTER	Unmodified	1132.5261	0.52613497	33	P04973	yes	yes	0	0	0	1	2	2	2	31.661	31.661	2;3	0.000154	9	2456	20140904-PurClathDigest-1ug-03	182.24	92.628	1532600000	846190000	420420000	266030000			1069	33	999	3573;3574;3575;3576;3577;3578	4953;4954;4955;4956;4957;4958;4959;4960;4961	4959
WREEQTERLEALDANSR	Unmodified	2102.0141	0.01409352	33	P04973	yes	yes	0	0	0	2	3	3	2	39.624	39.624	2;3;4	1.5446E-23	9	4296	20140904-PurClathDigest-1ug-03	284.57	267.01	195870000	105130000	54087000	36656000			1070	33	1000	3579;3580;3581;3582;3583;3584;3585;3586	4962;4963;4964;4965;4966;4967;4968;4969;4970	4968
WSPIAASLPELVQR	Unmodified	1565.8566	0.85657723	50	Q3ZCF0	yes	yes	0	0	0	0		1	1	51.75	51.75	2	1.2915E-07	2	7230	20140904-PurClathDigest-1ug-03	143.58	134.3	9549900	0	4955500	4594500			1071	50	1001	3587;3588	4971;4972	4972
WSQLLANSATR	Unmodified	1245.6466	0.64658446	7	E1BFB0	yes	yes	0	0	0	0	1	1	1	41.677	41.677	2	5.5656E-09	3	5012	20140904-PurClathDigest-1ug-02	214.67	201.86	28439000	17190000	4732500	6516900			1072	7	1002	3589;3590;3591	4973;4974;4975	4974
YEALKEPMVAR	Oxidation (M)	1321.67	0.67002202	7	E1BFB0	yes	yes	0	0	1	1	1	1	1	36.719	36.719	3	0.05145	3	3824	20140904-PurClathDigest-1ug-02	66.56	62.219	9663500	4941200	2761500	1960800			1073	7	1003	3592;3593;3594	4976;4977;4978	4977		41
YEEEVLSR	Unmodified	1023.4873	0.48728985	32	P02548	yes	yes	0	0	0	0	1	1	1	37.457	37.457	2	0.00081179	5	4322	20140904-PurClathDigest-1ug-01	156.75	18.851	205480000	109180000	56625000	39680000			1074	32	1004	3595;3596;3597	4979;4980;4981;4982;4983	4979
YEEEVLSREDAEGR	Unmodified	1680.7591	0.75910761	32	P02548	yes	yes	0	0	0	1	2	2	2	37.219	37.219	2;3	7.7039E-17	6	3697	20140904-PurClathDigest-1ug-03	252.52	212.78	176230000	100030000	44402000	31799000			1075	32	1005	3598;3599;3600;3601;3602;3603	4984;4985;4986;4987;4988;4989	4989
YEELQITAGR	Unmodified	1178.5932	0.5931519	1	CON__P04264	yes	yes	0	0	0	0	1	1	1	40.943	40.943	2	3.2819E-05	3	4587	20140904-PurClathDigest-1ug-03	169.93	5.2934	89967000	47510000	24047000	18411000		+	1076	1	1006	3604;3605;3606	4990;4991;4992	4992
YEVWVSAVR	Unmodified	1107.5713	0.57129425	9	E1BKN2	yes	yes	0	0	0	0	1	1	1	45.198	45.198	2	0.00047706	3	6314	20140904-PurClathDigest-1ug-01	144.5	106.99	24621000	12409000	6161100	6051500			1077	9	1007	3607;3608;3609	4993;4994;4995	4993
YFETSALKEEVTK	Unmodified	1543.777	0.77698951	13	F1MEW3	yes	yes	0	0	0	1	2	2	2	40.658	40.658	2;3	5.8428E-07	6	5121	20140904-PurClathDigest-1ug-01	150.22	144.84	382870000	187570000	132840000	62470000			1078	13	1008	3610;3611;3612;3613;3614;3615	4996;4997;4998;4999;5000;5001	4996
YGLVGGEGGK	Unmodified	935.47125	0.47124585	9	E1BKN2	yes	yes	0	0	0	0	1	1	1	37.059	37.059	2	0.00035745	3	4226	20140904-PurClathDigest-1ug-01	129.85	72.674	34429000	18005000	10502000	5922100			1079	9	1009	3616;3617;3618	5002;5003;5004	5002
YHEQLSTQSLIELFESFK	Unmodified	2198.0895	0.089549874	38	P49951;F1MPU0	yes	no	0	0	0	0	4	2	2	58.035	58.035	2;3	1.3958E-54	24	9482	20140904-PurClathDigest-1ug-01	334.03	325.74	585560000	373580000	167650000	44331000			1080	38	1010	3619;3620;3621;3622;3623;3624;3625;3626	5005;5006;5007;5008;5009;5010;5011;5012;5013;5014;5015;5016;5017;5018;5019;5020;5021;5022;5023;5024;5025;5026;5027;5028	5012
YIEIYVQK	Unmodified	1054.5699	0.56989727	38	P49951;F1MPU0	yes	no	0	0	0	0	1	1	1	42.26	42.26	2	0.0010564	11	5086	20140904-PurClathDigest-1ug-03	133.12	58.007	1291000000	694210000	258300000	338470000			1081	38	1011	3627;3628;3629	5029;5030;5031;5032;5033;5034;5035;5036;5037;5038;5039	5039
YIEIYVQKVNPSR	Unmodified	1607.8671	0.86714192	38	P49951;F1MPU0	yes	no	0	0	0	1	1	1	1	41.458	41.458	3	0.016426	3	5368	20140904-PurClathDigest-1ug-01	80.96	76.238	17579000	12323000	2433400	2822400			1082	38	1012	3630;3631;3632	5040;5041;5042	5040
YLDGLTAER	Unmodified	1036.5189	0.51892433	4	CON__P35908	yes	yes	0	0	0	0		1		41.188	41.188	2	0.050069	1	4868	20140904-PurClathDigest-1ug-02	72.607	18.832	6928800	0	6928800	0		+	1083	4	1013	3633	5043	5043
YLQMAR	Oxidation (M)	796.39016	0.39015876	38	P49951;F1MPU0	yes	no	0	0	1	0	1	1	1	31.975	31.975	2	0.048749	4	2903	20140904-PurClathDigest-1ug-02	106.05	26.109	1464700000	806680000	395070000	262960000			1084	38	1014	3634;3635;3636	5044;5045;5046;5047	5045		162
YLQMAR	Unmodified	780.39524	0.39524414	38	P49951;F1MPU0	yes	no	0	0	0	0	1	1	1	36.668	36.668	2	0.011749	3	3617	20140904-PurClathDigest-1ug-03	118.18	73.57	45239000	28054000	10142000	7043700			1085	38	1014	3637;3638;3639	5048;5049;5050	5050
YLTVAAIFR	Unmodified	1052.6019	0.6018661	8	E1BJB1;Q6B856	yes	no	0	0	0	0	1	1	1	51.212	51.212	2	0.00048849	3	7133	20140904-PurClathDigest-1ug-03	133.86	101.54	13916000	7208500	3330400	3376700			1086	8	1015	3640;3641;3642	5051;5052;5053	5053
YLTVAAVFR	Unmodified	1038.5862	0.58621603	47;45;49	Q2KJD0;E1B953;Q3MHM5;G3X7R8;Q2HJ81;Q3ZBU7	no	no	0	0	0	0	1	1	1	48.853	48.853	2	0.00033712	3	6563	20140904-PurClathDigest-1ug-03	160.63	126.63	17498000	8566800	4166300	4765400			1087	45;47;49	1016	3643;3644;3645	5054;5055;5056	5056
YPVATQK	Unmodified	805.4334	0.43340378	29;24	F1N3M8;G3MYP5	no	no	0	0	0	0	1	1	1	32.352	32.352	2	0.006803	3	2626	20140904-PurClathDigest-1ug-03	121.29	87.554	25043000	14022000	6410700	4610600			1088	24;29	1017	3646;3647;3648	5057;5058;5059	5059
YQKEQDVVQEWR	Unmodified	1606.774	0.77396981	29;24	F1N3M8;G3MYP5	no	no	0	0	0	1		1		39.79	39.79	3	8.1597E-05	1	4527	20140904-PurClathDigest-1ug-02	129.37	123.65	5462200	0	5462200	0			1089	24;29	1018	3649	5060	5060
YTEHSTVGLAQQWDQLDQLGMR	Oxidation (M)	2591.2074	0.20744995	7	E1BFB0	yes	yes	0	0	1	0	1	1	1	47.961	47.961	3	1.7125E-05	3	6322	20140904-PurClathDigest-1ug-03	97.49	96.541	32091000	14608000	8912500	8570200			1090	7	1019	3650;3651;3652	5061;5062;5063	5063		42
YTVPLPSPVQDSENLSGESGSFYEGTDDKAR	Unmodified	3344.5321	0.53207437	13	F1MEW3	yes	yes	0	0	0	1			1	46.687	46.687	3	0.033913	1	6001	20140904-PurClathDigest-1ug-03	60.527	60.426	16899000	0	0	16899000			1091	13	1020	3653	5064	5064
YVETPR	Unmodified	763.38645	0.38645359	32	P02548	yes	yes	0	0	0	0	1	1	1	32.357	32.357	2	0.0082325	3	2625	20140904-PurClathDigest-1ug-03	148.12	61.773	52561000	29433000	13505000	9623300			1092	32	1021	3654;3655;3656	5065;5066;5067	5067
YWALEQK	Unmodified	936.47052	0.47051757	29;24	F1N3M8;G3MYP5	no	no	0	0	0	0	1	1	1	42.149	42.149	2	0.0051534	3	5534	20140904-PurClathDigest-1ug-01	132.09	89.619	31185000	17460000	7719500	6005100			1093	24;29	1022	3657;3658;3659	5068;5069;5070	5068
