# Supplementary material for: The ∼16 kDa C-Terminal Sequence of Clathrin Assembly Protein AP180 Is Essential for Efficient Clathrin Binding
Source: PLoS One. 2014 Oct 20;9(10):e110557. doi: 10.1371/journal.pone.0110557 (PMC4203807; doi:10.1371/journal.pone.0110557)
Supplement: Data S2 — Contains the tabulated output of the MaxQuant software from processing the LC-MS/MS data of the tryptic digestion of purified clathrin. (ZIP) [file pone.0110557.s003.zip › txt/msms.txt]

Raw file	Scan number	Scan index	Precursor	Sequence	Length	Missed cleavages	Modifications	Modified sequence	Deamidation (NQ) Probabilities	Oxidation (M) Probabilities	Deamidation (NQ) Score Diffs	Oxidation (M) Score Diffs	Acetyl (Protein N-term)	Deamidation (NQ)	Oxidation (M)	Proteins	Charge	Fragmentation	Mass analyzer	Type	Scan event number	Isotope index	m/z	Mass	Mass Error [ppm]	Simple Mass Error [ppm]	Retention time	PEP	Score	Delta score	Score diff	Localization prob	Combinatorics	PIF	Fraction of total spectrum	Base peak fraction	Precursor Full ScanNumber	Precursor Intensity	Precursor Apex Fraction	Precursor Apex Offset	Precursor Apex Offset Time	Matches	Intensities	Mass Deviations [Da]	Mass Deviations [ppm]	Masses	Number of Matches	Intensity coverage	Peak coverage
20140904-PurClathDigest-1ug-01	9518	6270	0	AAEQAHLWAELVFLYDKYEEYDNAIITMMNHPTDAWK	37	1	2 Oxidation (M)	_AAEQAHLWAELVFLYDKYEEYDNAIITM(ox)M(ox)NHPTDAWK_		AAEQAHLWAELVFLYDKYEEYDNAIITM(1)M(1)NHPTDAWK		AAEQAHLWAELVFLYDKYEEYDNAIITM(81.72)M(81.72)NHPTDAWK	0	0	2	P49951;F1MPU0	4	HCD	FTMS	MULTI-MSMS	7	3	1115.5226	4458.0613	0.34605	-406.72734	57.73	0.0098558	81.721	81.67	81.721	1	1	0	0	0	-1	0	0	0	0	y1;y2;y3;y4;y6;y7;y8;y10;y11;y12;y13;y7-H2O;y11(2+);y12(2+);y21(2+);b2;b3;b4;b5;b6;b7;b8;b9;b9-NH3;b10;b10-NH3;b11;b12;b13;b14;b15;b20;b22;b24;b9(2+);b13(2+);b18(2+);b19(2+);b22(2+);b23(2+)	5847.4;3311.4;4349;1600.6;16867.2;1846.7;1597.7;1526;2670.2;3063.6;621.2;1253;566.9;457.2;870.2;1589.7;1526.6;1748.4;3490.3;10205.5;14143.6;6888.2;5136.1;422.5;25010;1565.9;24138.9;25043.3;4016.2;2308.1;766.8;4256.8;7474.2;4032.5;447.5;459.4;638.6;773;1558.1;1090.3	0.0007369581;0.001477046;0.002727235;0.002434778;0.005293823;0.01211415;-0.003993751;-0.005826409;0.007824265;0.005786683;-0.002040278;0.0112582;0.00757919;0.00746128;-0.001686569;0.0005976603;-0.0006338799;-0.0006387914;0.002322368;0.004465072;0.004288806;0.002265468;0.01012049;-0.004691305;0.005085375;0.005230671;0.002044097;0.006456358;0.0141578;-0.006168318;-0.02524065;0.01633615;0.01906913;0…	5.009501;4.433036;6.7468;4.688995;7.37968;14.17849;-4.123806;-4.61485;5.738078;3.918777;-1.283398;13.46041;11.10855;10.09882;-1.295781;4.17708;-2.329372;-1.596247;4.928442;7.340558;5.945457;2.496549;10.34319;-4.879368;4.591691;4.796625;1.674661;4.892412;9.652637;-3.904412;-14.48186;6.786526;7.101485;1.244813;-3.194518;3.979918;-13.9966;-12.92324;-2.221085;9.99317	147.112067212458;333.19064007807;404.22650367642;519.253739165405;717.351322446975;854.403413979745;968.462449330903;1262.53508044568;1363.56910824486;1476.65520980787;1589.74710074922;836.393705244456;682.284525298892;738.826675198903;1301.58475031438;143.080906381908;272.124731018239;400.183313441234;471.217466070047;608.274235227551;721.358475474319;907.439811766398;978.46907052859;961.4573332…	40	0.5648463	0.2247191
20140904-PurClathDigest-1ug-01	9528	6278	0	AAEQAHLWAELVFLYDKYEEYDNAIITMMNHPTDAWK	37	1	2 Oxidation (M)	_AAEQAHLWAELVFLYDKYEEYDNAIITM(ox)M(ox)NHPTDAWK_		AAEQAHLWAELVFLYDKYEEYDNAIITM(1)M(1)NHPTDAWK		AAEQAHLWAELVFLYDKYEEYDNAIITM(87)M(87)NHPTDAWK	0	0	2	P49951;F1MPU0	4	HCD	FTMS	MULTI-MSMS	1	2	1115.5226	4458.0613	0.34605	0.26571205	57.799	0.0098558	87.005	86.998	87.005	1	1	0	0	0	-1	0	0	0	0	y1;y2;y3;y4;y5;y6;y7;y8;y9;y10;y11;y12;y5-H2O;y7-H2O;y11(2+);b2;b3;b4;b5;b6;b7;b8;b9;b10;b11;b11-NH3;b12;b13;b14;b18;b20;b22;b24;b9(2+);b13(2+);b19(2+);b23(2+);b24(2+)	91748.7;58119.6;74563.6;21579.3;9850.6;255855;35411.2;18789.8;38645.4;14524.7;81879;83893.7;10333.7;8116.8;7214.2;27576.9;13967.8;23459.3;30647.9;124698.8;211130.7;81817.1;79869.8;286215.9;213554.9;7157.7;336924.2;66695.8;35855;19487.9;76086.4;98700.3;64430.1;7498.2;11659.9;11126.8;13478.6;13468.6	0.000971116;0.001952484;0.001380096;0.004265717;0.006089836;0.004220361;0.001152507;0.0002916444;0.004451458;-0.006120153;0.01053374;0.01707073;-0.001991792;0.01339663;0.001233405;0.000704012;0.0004504691;0.001482825;0.00206862;0.001950584;0.005967351;0.004513428;0.005218079;0.005037257;-0.002965561;-0.01204135;0.006268825;0.02037318;0.003069277;0.03091531;0.01345658;0.03108537;0.01485028;0.00427…	6.601209;5.859968;3.414155;8.215121;9.817602;5.883246;1.348886;0.301143;3.990587;-4.84751;7.725141;11.56049;-3.307003;16.01718;1.807741;4.920381;1.655384;3.705385;4.389945;3.206737;8.272398;4.973817;5.332874;4.548244;-2.429576;-10.00452;4.750305;13.89028;1.942797;14.38561;5.590263;11.57647;5.173746;8.730252;11.58248;-11.35247;7.835207;15.33883	147.111833054659;333.190164640586;404.227850815443;519.251908226849;620.297762581515;717.352395909313;854.414375624866;968.458163935252;1115.48940334987;1262.53537418946;1363.5663987678;1476.6439257592;602.295279524031;836.391566816037;682.29087108354;143.080800030229;272.123646669272;400.181191824504;471.217719817872;608.276749716485;721.356796929497;907.437563805915;978.473972942893;1107.516746…	38	0.5379889	0.2196532
20140904-PurClathDigest-1ug-01	9592	6334	0	AAEQAHLWAELVFLYDKYEEYDNAIITMMNHPTDAWK	37	1	2 Oxidation (M)	_AAEQAHLWAELVFLYDKYEEYDNAIITM(ox)M(ox)NHPTDAWK_		AAEQAHLWAELVFLYDKYEEYDNAIITM(1)M(1)NHPTDAWK		AAEQAHLWAELVFLYDKYEEYDNAIITM(49.43)M(49.43)NHPTDAWK	0	0	2	P49951;F1MPU0	4	HCD	FTMS	MULTI-MSMS	1	3	1115.5226	4458.0613	0.34605	-5.3869693	58.122	0.050195	49.43	49.424	49.43	1	1	0	0	0	-1	0	0	0	0	y1;y2;y3;y6;y7;y8;y11;y7-H2O;y12(2+);y21(2+);b5;b6;b7;b8;b9;b10;b11;b12;b13;b14;b10(2+);b20(2+);b22(2+);b23(2+)	48521.8;46957.1;60188.3;176804.7;19204.9;16297.6;20472.9;14037.6;7959.9;15836.7;16679;105087.1;101546;55390.6;28721.9;179308.2;186420.5;209821.4;37777.1;21263;25356.7;7346.4;30071.4;12250.9	0.000808706;0.0007079302;0.002970373;0.005031977;0.004551512;-0.008273955;-0.009320626;-0.01002654;-0.004771102;-0.02467078;-0.0003547764;0.004965204;0.007056157;0.006365531;0.008781668;0.004388597;-0.001822489;0.004713545;-0.001642001;0.01987235;-0.001662325;-0.004052402;0.01969015;0.003601597	5.497213;2.124695;7.348293;7.014659;5.327075;-8.543354;-6.835377;-11.98751;-6.457567;-18.95408;-0.7528889;8.16278;9.781799;7.014856;8.974894;3.962554;-1.4931;3.571762;-1.119487;12.57897;-2.999146;-3.365536;14.66013;2.572299	147.111995464633;333.191409193839;404.226260538971;717.351584293108;854.41097662064;968.466729533647;1363.58625313624;836.41498998234;738.83890758044;1301.60773452195;471.220143213982;608.273735095557;721.355708123212;907.435711703132;978.470409354354;1107.51739552064;1220.60767058728;1319.6695484695;1466.74431793121;1579.8068675664;554.266192617567;1204.0879352499;1343.10932848054;1400.146880760…	24	0.5296099	0.1983471
20140904-PurClathDigest-1ug-01	9814	6529	0	AAEQAHLWAELVFLYDKYEEYDNAIITMMNHPTDAWK	37	1	2 Oxidation (M)	_AAEQAHLWAELVFLYDKYEEYDNAIITM(ox)M(ox)NHPTDAWK_		AAEQAHLWAELVFLYDKYEEYDNAIITM(1)M(1)NHPTDAWK		AAEQAHLWAELVFLYDKYEEYDNAIITM(52.86)M(52.86)NHPTDAWK	0	0	2	P49951;F1MPU0	4	HCD	FTMS	MULTI-MSMS	7	3	1115.5226	4458.0613	0.34605	-12.834153	59.763	0.060851	52.858	52.858	52.858	1	1	0	0	0	-1	0	0	0	0	y1;y2;y3;y6;y7;y8;y11;y12;y11(2+);y12(2+);b2;b3;b4;b5;b6;b7;b8;b9;b10;b11;b12;b13;b14;b10(2+);b12(2+);b23(2+)	3104.6;1494.5;2468.1;9224.5;637.1;871.1;1705.7;1108.1;533.9;450.4;857.3;429.9;417;1039.9;4148.4;6093.1;3659;2310.1;4822.6;6589.8;7221.6;2366.5;1359.6;2239;995;619.8	0.001091442;0.002437888;0.003862234;0.0050104;0.004023575;0.0175091;0.004597806;-0.00888628;0.007834138;0.008970038;0.0003669935;0.002982344;-0.002436933;0.003583778;0.00676188;0.005864871;0.007199008;-0.002736142;0.01269589;-0.004293431;0.005832174;0.004411882;0.02357521;0.00877649;0.004252175;0.02762876	7.41914;7.316817;9.554655;6.98458;4.709177;18.07968;3.371883;-6.017784;11.48222;12.14095;2.564932;10.95962;-6.089515;7.60538;11.11654;8.130332;7.933361;-2.796313;11.46346;-3.517446;4.419424;3.007955;14.92288;15.83473;6.439406;19.7331	147.111712728189;333.189679236236;404.225368677882;717.351605870618;854.411504557699;968.440946480744;1363.57233470445;1476.66988277053;682.284270350016;738.825166440611;143.081137048751;272.121114794384;400.185111583104;471.216204659271;608.271938420477;721.356899409084;907.43487822536;978.481927163461;1107.50908823152;1220.6101415291;1319.66842984061;1466.73826404827;1579.80316469758;554.255753…	26	0.4442683	0.245283
20140904-PurClathDigest-1ug-01	9548	6296	0	AAEQAHLWAELVFLYDKYEEYDNAIITMMNHPTDAWK	37	1	2 Oxidation (M)	_AAEQAHLWAELVFLYDKYEEYDNAIITM(ox)M(ox)NHPTDAWK_		AAEQAHLWAELVFLYDKYEEYDNAIITM(1)M(1)NHPTDAWK		AAEQAHLWAELVFLYDKYEEYDNAIITM(46.76)M(46.76)NHPTDAWK	0	0	2	P49951;F1MPU0	3	HCD	FTMS	MULTI-MSMS	5	2	1487.0277	4458.0613	1.6012	-3.4407272	57.891	0.062372	46.76	46.757	46.76	1	1	0	0	0	-1	0	0	0	0	y2;y3;y6;y7;y8;y11;y12;y15;y7-H2O;b4;b5;b6;b7;b8;b9;b10;b11;b12;b13;b14;b16;b10(2+);b11(2+)	5364.9;6740.9;68591.2;12954.9;2618;4601.1;5165.9;3634.6;4470.4;8983.3;14112.5;62635.1;79144.6;22915.3;19696.7;37700.8;23062.6;27234.4;19200.9;9398;7292;2635.4;4380.6	0.003550829;0.001595813;0.007006764;0.009198647;-0.01723704;0.01182776;-0.008763895;0.02499598;0.0006617282;0.003781804;0.004405366;0.004059143;0.006849226;0.004253713;0.009090702;0.007579798;0.007577746;0.007407709;0.02825608;0.02758355;0.01209313;0.005023724;0.005512594	10.65712;3.947809;9.767572;10.76613;-17.79811;8.674147;-5.934906;14.08383;0.7911583;9.450284;9.348944;6.673207;9.494933;4.687609;9.29073;6.843974;6.208223;5.613318;19.26488;17.46017;6.509014;9.063848;9.025187	333.188566295083;404.227635098526;717.349609506003;854.406329485181;968.475692615676;1363.56510474738;1476.6697603864;1774.80010572124;836.404301717879;400.178892845398;471.215383071381;608.274641157191;721.355915054474;907.437823520665;978.470100319958;1107.51420431956;1220.59827035217;1319.66685430482;1466.71441985387;1579.79915635713;1857.90491835261;554.259506567803;610.801049688873	23	0.5625585	0.2527473
20140904-PurClathDigest-1ug-01	10058	6742	0	AAEQAHLWAELVFLYDKYEEYDNAIITMMNHPTDAWK	37	1	2 Oxidation (M)	_AAEQAHLWAELVFLYDKYEEYDNAIITM(ox)M(ox)NHPTDAWK_		AAEQAHLWAELVFLYDKYEEYDNAIITM(1)M(1)NHPTDAWK		AAEQAHLWAELVFLYDKYEEYDNAIITM(65.96)M(65.96)NHPTDAWK	0	0	2	P49951;F1MPU0	4	HCD	FTMS	MULTI-MSMS	3	2	1115.5226	4458.0613	0.86163	-7.2711964	61.431	0.039319	65.962	65.961	65.962	1	1	0	0	0	-1	0	0	0	0	y1;y2;y3;y4;y5;y6;y7;y8;y9;y11;y12;y11(2+);b2;b4;b5;b6;b7;b8;b9;b10;b11;b12;b13;b14;b16;b22;b9(2+);b12(2+);b18(2+);b20(2+)	62432.2;52332.5;49121.9;6791.5;18622.4;197880;33206.3;12881.8;13130.7;57460.9;25633.5;23007.7;9994.2;24926.2;20000.3;104653;164881.8;79685.8;27376.4;223813.3;261791.2;168596.9;49851.5;31996.3;14086.2;54162.2;7122.2;32814.1;12806.7;15962	0.0008275508;0.0002323304;0.001970945;0.005452037;0.001561842;0.004176115;0.0004379269;0.001334136;-0.009291639;0.01481875;-0.0009016562;0.002572198;0.0001358986;0.001649777;0.003125643;0.001733873;0.007162306;0.002389749;0.009959196;0.006415784;0.006580392;0.006599943;0.01650202;0.01598154;0.02297772;0.008738558;0.002763032;0.002284096;0.01700059;0.01413461	5.625312;0.6972871;4.875834;10.49982;2.517872;5.821567;0.5125459;1.377589;-8.32955;10.86768;-0.6106044;3.769951;0.9497998;4.122577;6.633134;2.850466;9.928952;2.633507;10.17834;5.792953;5.391116;5.001216;11.25092;10.11611;12.36762;3.254291;5.641828;3.458978;15.81414;11.73903	147.111976619818;333.191884793681;404.227259966817;519.25072190657;620.30229057597;717.352440154843;854.415090205455;968.457121443501;1115.50314644612;1363.5621137559;1476.66189814695;682.289532290237;143.081368143548;400.181024872848;471.216662794294;608.276966426846;721.355601974936;907.439687485332;978.469231825727;1107.51536833379;1220.59926770571;1319.6676620719;1466.72617391481;1579.8107583…	30	0.6005676	0.25
20140904-PurClathDigest-1ug-01	10124	6800	0	AAEQAHLWAELVFLYDKYEEYDNAIITMMNHPTDAWK	37	1	2 Oxidation (M)	_AAEQAHLWAELVFLYDKYEEYDNAIITM(ox)M(ox)NHPTDAWK_		AAEQAHLWAELVFLYDKYEEYDNAIITM(1)M(1)NHPTDAWK		AAEQAHLWAELVFLYDKYEEYDNAIITM(54.93)M(54.93)NHPTDAWK	0	0	2	P49951;F1MPU0	4	HCD	FTMS	MULTI-MSMS	5	2	1115.5226	4458.0613	0.86163	224.21956	61.824	0.058635	54.926	54.926	54.926	1	1	0	0	0	-1	0	0	0	0	y1;y2;y3;y6;y7;y9;y11;b2;b4;b5;b6;b7;b8;b9;b10;b11;b12;b13;b10(2+);b11(2+);b12(2+);b22(2+)	2038.1;1318.9;737;6330.5;1182;1149.7;2862.8;441.7;820.3;573.7;4048.5;2639;1936.8;1107.1;4843.5;2373.7;5304.1;1182.2;882.8;2394.7;880.4;954.9	0.0006415573;0.003147671;0.002403577;0.006025657;0.003888887;0.008716574;0.01482289;0.0009700342;-0.003562198;0.002913961;0.005371301;0.001423171;0.009842139;0.008250774;0.004435797;0.005954582;0.0004226392;0.007229703;0.002257112;0.00633792;0.003662511;0.01864973	4.361008;9.447104;5.94611;8.399877;4.551538;7.814155;10.87071;6.779637;-8.901352;6.183906;8.830407;1.972896;10.84614;8.432314;4.005171;4.878407;0.3202603;4.929111;4.072282;10.37642;5.546426;13.88548	147.112162613297;333.188969452986;404.226827334741;717.350590613638;854.411639245791;1115.48513823395;1363.56210961636;143.080534008052;400.186236848319;471.216874476925;608.273328998936;721.361341109504;907.432235094783;978.470940247486;1107.51734832116;1220.59989351619;1319.67383937529;1466.73544622799;554.262273179803;610.800224362839;660.337106729478;1343.1103689081	22	0.5459315	0.2933333
20140904-PurClathDigest-1ug-01	10131	6806	0	AAEQAHLWAELVFLYDKYEEYDNAIITMMNHPTDAWK	37	1	2 Oxidation (M)	_AAEQAHLWAELVFLYDKYEEYDNAIITM(ox)M(ox)NHPTDAWK_		AAEQAHLWAELVFLYDKYEEYDNAIITM(1)M(1)NHPTDAWK		AAEQAHLWAELVFLYDKYEEYDNAIITM(41.08)M(41.08)NHPTDAWK	0	0	2	P49951;F1MPU0	4	HCD	FTMS	MULTI-MSMS	4	2	1115.5226	4458.0613	0.86163	-0.0034632545	61.873	0.061829	41.081	41.081	41.081	1	1	0	0	0	-1	0	0	0	0	y1;y2;y3;y6;y9;y11;y11(2+);y12(2+);b3;b4;b5;b6;b7;b8;b9;b10;b11;b12;b14;b10(2+);b11(2+);b12(2+)	1623.5;1178.1;839.1;6449.3;973.6;876.7;702.8;400.5;683.2;507.6;749.4;2091.6;3652.3;1547.6;1829.6;5032.8;4117.2;4312.5;1119.5;897.8;2482.3;715.7	0.0007698258;0.002910637;0.0003455976;0.003054406;-0.01757571;-0.004876813;0.003615082;-0.01470284;0.001412504;0.006229188;0.002732297;0.004658481;0.006057714;0.002254707;0.006917316;0.005526541;-0.0005480688;0.01676425;-0.001367374;-0.001588603;0.003583351;0.007197775	5.232922;8.735688;0.8549551;4.25788;-15.75574;-3.576473;5.298465;-19.89966;5.190688;15.5661;5.798383;7.658523;8.397667;2.48469;7.069506;4.990032;-0.4490135;12.70349;-0.8655205;-2.866137;5.866623;10.90021	147.112034344805;333.189206486942;404.228885314337;717.353561864464;1115.51143052063;1363.58180932348;682.288489406929;738.848839322562;272.122684634475;400.176445462048;471.21705614056;608.274041819291;721.356706566599;907.439822527233;978.472273706328;1107.51625757666;1220.60639616706;1319.65749776433;1579.82810728474;554.266118894799;610.802978931665;660.333571465202	22	0.5451834	0.2972973
20140904-PurClathDigest-1ug-02	8754	5727	0	AAEQAHLWAELVFLYDKYEEYDNAIITMMNHPTDAWK	37	1	2 Oxidation (M)	_AAEQAHLWAELVFLYDKYEEYDNAIITM(ox)M(ox)NHPTDAWK_		AAEQAHLWAELVFLYDKYEEYDNAIITM(1)M(1)NHPTDAWK		AAEQAHLWAELVFLYDKYEEYDNAIITM(99.56)M(99.56)NHPTDAWK	0	0	2	P49951;F1MPU0	4	HCD	FTMS	MULTI-MSMS	1	2	1115.5226	4458.0613	-0.66397	0.44516225	57.913	0.0011596	99.562	99.547	99.562	1	1	0	0	0	-1	0	0	0	0	y1;y2;y3;y4;y5;y6;y7;y8;y9;y10;y11;y12;y13;y2-NH3;y5-H2O;y7-H2O;y13-H2O;y11(2+);y21(2+);b2;b4;b5;b6;b7;b8;b9;b10;b10-H2O;b11;b12;b13;b14;b15;b16;b20;b22;b13(2+);b14(2+);b19(2+);b24(2+)	615320.2;494297.6;546028.2;125099.8;104915.3;1771255;313076.6;224213.4;202350.8;231564.3;894160.5;510095.7;145836.1;60124.3;47290.8;143651.5;49646.4;64015;236850.6;140671.8;179738.9;197521.9;938512.9;1258697;688488.7;527825.5;2368044;53510.3;1231615;2197635;1028641;535372.5;94184.4;124206;286138.8;872543.8;79031.9;27680;163607.5;141369.8	0.0008738869;0.001801073;0.001244859;0.001233324;0.0001750671;0.004175012;0.003537972;9.652357E-05;0.009564494;0.007146427;0.007906209;0.000490438;0.005328333;0.004198968;-0.005158512;0.0002370532;0.02428183;0.007233222;-0.004978147;0.000811762;0.003006461;0.003291187;0.003156929;0.004546249;0.003456767;0.004029308;0.00736473;0.009598754;-0.002773619;0.007727348;0.009095503;-0.001012923;-0.021221…	5.940286;5.405538;3.079596;2.375181;0.282228;5.820029;4.140827;0.09966724;8.574297;5.660438;5.798173;0.3321264;3.351701;13.28109;-8.564711;0.2834193;15.4493;10.60147;-3.824672;5.673456;7.512778;6.984447;5.189965;6.302346;3.809368;4.117946;6.649783;8.810225;-2.272325;5.855531;6.201196;-0.6411607;-12.17587;6.940969;1.072557;5.90835;7.132539;-2.402316;7.288065;7.502281	147.111930283737;333.190316051136;404.227986052908;519.254940619649;620.303677350921;717.352441258191;854.411990160223;968.458359056028;1115.48429031449;1262.52210760901;1363.5690263011;1476.66050605275;1589.73973213793;316.161369054018;602.298446243408;836.404726392886;1571.71021395502;682.284871266438;1301.58804189266;143.080692280201;400.179668188857;471.216497250852;608.275543371098;721.35821…	40	0.5512932	0.1980198
20140904-PurClathDigest-1ug-02	8765	5737	0	AAEQAHLWAELVFLYDKYEEYDNAIITMMNHPTDAWK	37	1	2 Oxidation (M)	_AAEQAHLWAELVFLYDKYEEYDNAIITM(ox)M(ox)NHPTDAWK_		AAEQAHLWAELVFLYDKYEEYDNAIITM(1)M(1)NHPTDAWK		AAEQAHLWAELVFLYDKYEEYDNAIITM(50.61)M(50.61)NHPTDAWK	0	0	2	P49951;F1MPU0	4	HCD	FTMS	MULTI-MSMS	4	3	1115.5226	4458.0613	-0.66397	223.50176	57.965	0.061325	50.611	50.597	50.611	1	1	0	0	0	-1	0	0	0	0	y1;y2;y3;y4;y6;y7;y8;y9;y10;y11;y12;y7-H2O;y12(2+);b2;b3;b4;b5;b6;b7;b8;b9;b10;b11;b12;b13;b14;b12(2+);b20(2+);b22(2+)	83140.4;67797.8;73650.4;23233.2;338425.7;58483;16990.1;21911;21109.2;33399.2;81376.2;15353.5;9711.3;24342.2;25044.4;20740.6;48884.4;160550.1;185248.3;84952.1;92801.3;344188.3;346530;304572.7;119224.2;57390.3;42967.1;39368.2;42258.6	0.001009645;0.001630071;0.00218503;0.004099952;0.005159793;0.004421478;0.003737109;-0.003980837;0.007148711;0.003600708;0.003481257;0.0001728532;0.002003486;0.0007081418;0.004057286;-0.001961043;0.003645272;0.005866728;0.006137971;0.00376744;0.01157998;0.005669355;0.003436599;0.007676311;-0.0005460079;0.007299991;0.007532295;0.01482317;0.01160767	6.863111;4.892309;5.405452;7.89588;7.192838;5.174884;3.858837;-3.568664;5.662247;2.640641;2.357525;0.2066621;2.711693;4.949244;14.90991;-4.900345;7.73588;9.644896;8.508927;4.151731;11.83481;5.118982;2.815494;5.816856;-0.3722587;4.620776;11.40681;12.3109;8.642338	147.111794526042;333.190487053405;404.227045881926;519.252073991613;717.351456476935;854.411106654405;968.454718470828;1115.49783564472;1262.52210532487;1363.57333180268;1476.65751523375;836.404790592889;738.832132992716;143.080795900371;272.120039852035;400.184635692779;471.216143166102;608.272833572161;721.356626309574;907.43830979376;978.467611045764;1107.51611476305;1220.60241149953;1319.6665…	29	0.5083746	0.1870968
20140904-PurClathDigest-1ug-03	8441	5557	0	AAEQAHLWAELVFLYDKYEEYDNAIITMMNHPTDAWK	37	1	2 Oxidation (M)	_AAEQAHLWAELVFLYDKYEEYDNAIITM(ox)M(ox)NHPTDAWK_		AAEQAHLWAELVFLYDKYEEYDNAIITM(1)M(1)NHPTDAWK		AAEQAHLWAELVFLYDKYEEYDNAIITM(72.39)M(72.39)NHPTDAWK	0	0	2	P49951;F1MPU0	4	HCD	FTMS	MULTI-MSMS	2	3	1115.5226	4458.0613	0.15501	-0.99043936	57.972	0.019071	72.389	72.389	72.389	1	1	0	0	0	-1	0	0	0	0	y1;y2;y3;y4;y6;y7;y8;y9;y10;y11;y12;y7-H2O;y10(2+);y11(2+);b2;b3;b4;b5;b6;b7;b8;b9;b10;b11;b12;b13;b14;b16;b12(2+);b13(2+);b19(2+);b24(2+)	64269;50075.8;59952.3;8417;214032.8;30681.2;10184;9702.1;21979.2;64746.8;50935.1;18202.5;5729.4;6068.5;18752.7;15208.7;13721.3;19817;114714.6;152866.2;76414.3;42434;242620.1;252900.4;135803.3;94633.7;27168.3;25383.8;27537.1;10315.3;23300;7440.9	0.0009496308;0.00254361;0.003023656;0.00118755;0.004608208;0.01310708;0.003437582;-0.01356236;0.02372233;0.006831984;0.02121807;0.005248653;0.007470516;0.0127879;0.0009334765;0.003937578;0.003062133;0.001246399;0.002313954;0.004938007;0.003082535;-0.003999299;0.003748205;-0.0002244343;0.01008569;0.01655555;0.02508725;0.03707179;0.003588762;0.003364397;-0.005848712;0.0112137	6.455162;7.634122;7.480108;2.287027;6.423915;15.34064;3.549552;-12.15802;18.78988;5.010365;14.36916;6.275293;11.82491;18.7429;6.524132;14.47;7.651896;2.645055;3.804116;6.845433;3.396961;-4.087244;3.384329;-0.1838712;7.642618;11.28742;15.88;19.95382;5.434742;4.584449;-5.132392;7.810842	147.111854539799;333.189573514071;404.226207256281;519.25498639388;717.352008061667;854.402421048636;968.455017997966;1115.50741716492;1262.50553170885;1363.57010052633;1476.63977841853;836.399714792983;631.760794735042;682.279316592574;143.080570565635;272.12015956078;400.179612517298;471.218542038516;608.276386345983;721.357826273518;907.438994698887;978.483190320458;1107.51803591266;1220.60607…	32	0.5405469	0.2064516
20140904-PurClathDigest-1ug-03	8520	5626	0	AAEQAHLWAELVFLYDKYEEYDNAIITMMNHPTDAWK	37	1	2 Oxidation (M)	_AAEQAHLWAELVFLYDKYEEYDNAIITM(ox)M(ox)NHPTDAWK_		AAEQAHLWAELVFLYDKYEEYDNAIITM(1)M(1)NHPTDAWK		AAEQAHLWAELVFLYDKYEEYDNAIITM(41.22)M(41.22)NHPTDAWK	0	0	2	P49951;F1MPU0	4	HCD	FTMS	MULTI-MSMS	1	3	1115.5226	4458.0613	0.15501	-6.912296	58.533	0.062372	41.218	41.218	41.218	1	1	0	0	0	-1	0	0	0	0	y1;y2;y3;y6;b5;b6;b7;b8;b9;b10;b11;b12;b13;b16;b10(2+);b11(2+);b12(2+);b22(2+)	1270.8;630.8;688.5;3037.3;746.5;847.5;2410.7;1132.9;958.4;2927.3;3104.7;2659.7;530.4;699.1;702.3;1009.9;804.2;479	0.0009003228;0.0004201839;0.001314851;0.002283684;0.006599617;0.004646992;0.01092656;0.001908507;-0.0003874595;-0.003168647;0.0005055942;0.01307126;-0.00414169;0.01391763;0.002791257;-0.005082129;0.002543229;-0.01636479	6.119986;1.261087;3.252746;3.183481;14.00559;7.639636;15.14734;2.103177;-0.3959812;-2.861017;0.414216;9.905011;-2.823725;7.491042;5.03599;-8.320289;3.851403;-12.18393	147.111903847798;333.191696940218;404.227916061126;717.354332586503;471.21318882047;608.274053307798;721.351837719287;907.440168726691;978.479578481176;1107.52495276523;1220.60534250412;1319.66119075581;1466.74681762029;1857.90309385125;554.261739035624;610.811644411484;660.338226011727;1343.14538342154	18	0.5463089	0.3673469
20140904-PurClathDigest-1ug-03	8886	5898	0	AAEQAHLWAELVFLYDKYEEYDNAIITMMNHPTDAWK	37	1	2 Oxidation (M)	_AAEQAHLWAELVFLYDKYEEYDNAIITM(ox)M(ox)NHPTDAWK_		AAEQAHLWAELVFLYDKYEEYDNAIITM(1)M(1)NHPTDAWK		AAEQAHLWAELVFLYDKYEEYDNAIITM(61.96)M(61.96)NHPTDAWK	0	0	2	P49951;F1MPU0	4	HCD	FTMS	MULTI-MSMS	7	3	1115.5226	4458.0613	-0.045028	221.97644	61.441	0.046323	61.96	61.96	61.96	1	1	0	0	0	-1	0	0	0	0	y1;y2;y3;y4;y5;y6;y7;y8;y9;y11;y12;b4;b5;b6;b7;b8;b9;b10;b11;b12;b13;b14;b10(2+);b12(2+);b19(2+)	7488.4;4230.1;7585.4;1774.5;1354.1;24479.7;3235.4;1492.9;6340.5;2766.4;3388.3;1825.9;2068.4;9448.4;14290.6;5742.1;2819.7;20272.7;26158.2;17640;5523.1;5751.8;5354.5;2457.9;2522.2	0.0003001607;6.759886E-05;0.003388777;0.002422035;0.01171693;0.002138489;0.01388408;-0.007007583;0.01709692;0.01307066;0.01178698;0.004261629;0.007779677;0.005436731;0.001824272;0.002853704;0.0100542;0.004118553;0.006273724;0.008976446;-8.936444E-05;0.001713952;0.006952912;0.001351637;-0.01615107	2.040348;0.2028826;8.383375;4.664453;18.88937;2.981077;16.25006;-7.235759;15.32701;9.585661;7.982247;10.64932;16.50993;8.937974;2.52893;3.144788;10.27544;3.718724;5.139871;6.802063;-0.06092714;1.0849;12.54455;2.046882;-14.17284	147.112504009904;333.192049525235;404.225842134908;519.253751909283;620.292135487804;717.354477781055;854.401644056428;968.46546316278;1115.47675788623;1363.56386184934;1476.64920951235;400.178413020837;471.212008760455;608.273263569609;721.360940008825;907.439223530312;978.469136822003;1107.5176655648;1220.59957437434;1319.66528556851;1466.74276529514;1579.82502595885;554.257577380192;660.339417…	25	0.522252	0.2380952
20140904-PurClathDigest-1ug-01	2582	201	0	AAKDEVSESR	10	1	Unmodified	_AAKDEVSESR_					0	0	0	P02548	2	HCD	FTMS	MULTI-MSMS	7	0	546.27001	1090.5255	-0.41558	-5.70294	30.404	0.00015633	141.1	102.32	NaN	NaN	1	0	0	0	-1	0	0	0	0	y1;y2;y3;y4;y5;y6;y7;y8;y9;y1-NH3;y2-NH3;y4-H2O;y4-NH3;y5-H2O;y5-NH3;y6-H2O;y7-H2O;y8-H2O;y8-NH3;y9-H2O;b2;b3;b4;b4-H2O;b6	307544.7;1215555;126649.8;1304182;1369480;2211066;5807482;2365611;551150.4;93364.9;199608.5;25489.9;141226.3;53292.1;31335;379497.1;373253.3;39343.6;502719.2;43922.6;299651;89758.7;361363.3;119821.1;59743.1	0.0008875849;0.001381702;0.001543365;0.002496986;0.003058399;0.003704996;0.003742971;0.005421655;0.005266587;0.0008458017;0.001068098;0.002763149;0.002968592;0.00386227;0.001668218;0.007321905;0.007710075;0.00511702;0.003871435;0.004308406;0.0006339208;0.0008431677;0.001839913;0.00117276;0.0007144349	5.068494;5.270664;3.945288;5.221384;5.297847;5.245396;4.557042;5.710292;5.16084;5.350075;4.35739;6.004076;6.436725;6.905795;2.977547;10.63738;9.597461;5.493649;4.151993;4.297745;4.430507;3.109305;4.764125;3.185188;1.162981	175.118064596059;262.149598888545;391.19203032175;478.223105110632;577.290957614004;706.332904113722;821.359809170431;949.453093504354;1020.49036235986;158.091557277778;245.123363391111;460.212274261472;461.19608440307;559.27958905708;560.265798693796;688.318722518207;803.34527738016;931.442833453351;932.428094622595;1002.48075585419;143.080870121366;271.17562389223;386.201570179324;368.191672645…	25	0.8013291	0.2066116
20140904-PurClathDigest-1ug-01	2585	203	0	AAKDEVSESR	10	1	Unmodified	_AAKDEVSESR_					0	0	0	P02548	3	HCD	FTMS	MSMS	2	0	364.51577	1090.5255	NaN	-7.0568438	30.42	2.7783E-06	125.74	84.337	NaN	NaN	1	0	0	0	-1	0	0	0	0	y1;y2;y3;y4;y5;y6;y7;y1-NH3;y2-NH3;y3-H2O;y4-H2O;y4-NH3;y5-H2O;y6-H2O;y7-H2O;y8(2+);y9(2+);b2;b4;b4-H2O;b5;b5-H2O;b6	214922.1;681068.3;281671;1088419;61241.2;57276.5;189869.7;100580.3;167511;132423;99131.1;38974;14018.4;28242.6;33576.7;27878.2;18703.3;60714.3;127185;75986;353046.5;59658.4;52452.2	0.00114906;0.001619317;0.002280297;0.003181716;0.00302261;0.004549574;0.004225133;0.001053595;0.001156576;0.007043103;0.001762352;0.005713447;0.008458916;0.007779623;0.005435728;0.003351841;-0.003310889;0.0008924993;0.002871349;0.004398668;0.005190949;0.005124245;0.01014521	6.561641;6.177077;5.82911;6.653214;5.235851;6.441126;5.144073;6.664466;4.718344;18.87341;3.829424;12.3884;15.12479;11.30236;6.766347;7.053098;-6.482346;6.237738;7.434865;11.94678;10.0748;10.30558;16.51496	175.117803120957;262.14936127419;391.191293390079;478.222420381052;577.290993403575;706.332059535569;821.359327008715;158.091349484994;245.123274913459;373.175965897781;460.213275058807;461.193339548566;559.274992411171;688.318264800335;803.347551726453;475.229543972302;510.754763596088;143.080611542902;386.200538742933;368.188446737351;515.24081223894;497.230314256459;614.304271895432	23	0.6633003	0.2987013
20140904-PurClathDigest-1ug-02	2323	100	0	AAKDEVSESR	10	1	Unmodified	_AAKDEVSESR_					0	0	0	P02548	2	HCD	FTMS	MULTI-MSMS	2	0	546.27001	1090.5255	-0.9559	-5.5195422	30.381	0.00013594	152.7	110.82	NaN	NaN	1	0	0	0	-1	0	0	0	0	y1;y2;y3;y4;y5;y6;y7;y8;y9;y1-NH3;y2-NH3;y4-H2O;y4-NH3;y5-H2O;y6-H2O;y6-NH3;y7-H2O;y7-NH3;y8-H2O;y8-NH3;y9(2+);b2;b3;b4;b4-H2O;b5;b6	124409.5;426845.1;61611.2;494110.5;521536.2;853283.4;2094813;874234.4;39288;42620.9;82797.4;10162.8;55342.5;26073.6;126143.3;8779.2;111059.6;34871;11228.9;21702.5;130117.2;101532.6;22020.9;145400.6;43537.2;50881.2;24837.9	0.001159591;0.001478502;0.001987478;0.002974506;0.003055029;0.004219755;0.004150639;0.00612542;0.004350666;0.0009378899;0.00114219;0.001328487;0.00408885;0.008478453;0.005015217;0.002203862;0.003645141;0.001165721;0.006354157;0.003840809;0.003014436;0.0004797346;0.002218761;0.001949398;0.002142095;0.005157667;0.004604499	6.621775;5.639918;5.080575;6.219919;5.292009;5.974177;5.053377;6.45153;4.263306;5.932578;4.659656;2.886674;8.865773;15.15972;7.28616;3.19721;4.537429;1.449296;6.821852;4.119147;5.901998;3.352888;8.18205;5.047621;5.817897;10.01021;7.495402	175.117792590466;262.149502089116;391.191586208531;478.222627591276;577.290960984002;706.332389354898;821.359401502735;949.452389738635;1020.49127828038;158.091465189612;245.123289299274;460.213708923751;461.194964145525;559.274972873407;688.321029206478;689.307856145603;803.349342314114;804.33583731918;931.441596315749;932.428125249156;510.748438270647;143.081024307593;271.174248298646;386.20146…	27	0.7949278	0.3068182
20140904-PurClathDigest-1ug-02	2327	104	0	AAKDEVSESR	10	1	Unmodified	_AAKDEVSESR_					0	0	0	P02548	3	HCD	FTMS	MULTI-MSMS	6	0	364.51577	1090.5255	-1.4441	-5.9564569	30.394	0.0014598	125.74	81.967	NaN	NaN	1	0	0	0	-1	0	0	0	0	y1;y2;y3;y4;y5;y6;y7;y1-NH3;y2-NH3;y3-H2O;y4-H2O;y4-NH3;y5-H2O;y6-H2O;y7-H2O;b2;b4;b4-H2O;b5;b5-H2O;b6	107934.4;329434.6;156596;542247;27332.3;30363.3;88377.6;45418.5;82488.7;59579.9;59174.5;17189.3;8675.8;25018.1;20752.9;42774.5;70629.1;40696.8;181373.7;18263.3;38360.1	0.001098883;0.001580379;0.002403526;0.003164046;0.003653898;0.004835271;0.005213106;0.0009706349;0.001241025;0.006133222;0.003572868;0.003520243;0.006670535;0.004229358;-0.001646186;0.0007644714;0.001726283;0.002834344;0.005552789;0.007142947;0.005811639	6.275107;6.028543;6.144121;6.616264;6.329393;6.845609;6.346932;6.139706;5.062864;16.43516;7.763535;7.632864;11.92707;6.144448;-2.049139;5.342937;4.4699;7.698048;10.77708;14.36553;9.460455	175.11785329777;262.149400212095;391.191170161337;478.222438051009;577.29036211525;706.331773838318;821.358339035381;158.091432444638;245.123190464023;373.176875778959;460.211464543094;461.195532752475;559.276780791859;688.321815065312;803.354633640774;143.080739570842;386.201683809088;368.190011061397;515.240450399329;497.228295555041;614.308605465175	21	0.6765643	0.244186
20140904-PurClathDigest-1ug-03	2187	85	0	AAKDEVSESR	10	1	Unmodified	_AAKDEVSESR_					0	0	0	P02548	2	HCD	FTMS	MULTI-MSMS	4	0	546.27001	1090.5255	-0.22298	-5.1527465	30.37	8.3958E-05	165.63	123.44	NaN	NaN	1	0	0	0	-1	0	0	0	0	y1;y2;y3;y4;y5;y6;y7;y8;y9;y1-NH3;y2-NH3;y4-NH3;y5-H2O;y5-NH3;y6-H2O;y7-H2O;y7-NH3;y8-H2O;y8-NH3;y9-H2O;b2;b3;b4;b4-H2O;b6;b7;b8	118705.2;462771.6;61558.2;495326.4;565604.5;901939.7;2274395;916687.1;217646.7;35704.7;78452.9;70239.1;21039.5;25822.2;145918.1;89269.2;53726;16137.5;192181.7;20041.2;99635.6;28100.7;173384.5;49386.9;11508.8;3390.1;4445.5	0.0009626623;0.001501198;0.001862897;0.002978359;0.003424837;0.004140321;0.004327575;0.005897209;0.006361303;0.0009408461;0.001538846;0.002611099;0.007638684;0.00121001;0.006260609;0.004415454;-0.002362458;0.004903338;0.003930693;0.007569059;0.0007818455;0.00196288;0.002160567;0.001316888;0.006642584;0.009037925;0.01104863	5.497221;5.726496;4.762108;6.227976;5.932605;5.861717;5.268796;6.211167;6.233582;5.951277;6.277855;5.661577;13.65817;2.159705;9.095495;5.496312;-2.93714;5.264238;4.215545;7.550353;5.464366;7.238437;5.594407;3.576638;10.81312;12.8867;13.30554	175.1179895187;262.14947939299;391.191710790084;478.222623737822;577.290591175983;706.332468788157;821.35922456655;949.45261795032;1020.48926764346;158.091462233374;245.122892643514;461.19644189647;559.275812642972;560.266256901698;688.31978381373;803.348572000902;804.33936549757;931.44304713429;932.428035365058;1002.47749520188;143.080722196708;271.174504180164;386.201249524821;368.191528517884;…	27	0.7970785	0.2076923
20140904-PurClathDigest-1ug-03	2198	95	0	AAKDEVSESR	10	1	Unmodified	_AAKDEVSESR_					0	0	0	P02548	3	HCD	FTMS	MULTI-MSMS	7	0	364.51577	1090.5255	-0.56789	-5.1311666	30.415	0.012577	88.596	49.292	NaN	NaN	1	0	0	0	-1	0	0	0	0	y1;y2;y3;y4;y5;y6;y7;y1-NH3;y2-NH3;y4-H2O;y4-NH3;y5-H2O;y6-H2O;y7-H2O;y8(2+);b2;b4;b4-H2O;b5;b5-H2O;b6	35288.4;83309.2;36944.2;142369.3;8515.9;9186.9;23454.2;13990;22814;14697.7;3682.5;4008.5;5536.7;4877.3;3947.6;7982.8;20376.1;7477.2;47835.8;3324.9;20693.5	0.001224478;0.001623424;0.002819813;0.003696861;0.004432827;0.006408383;0.007018071;0.00140647;0.001704686;0.002753768;0.006273125;0.002166301;0.00421471;0.006365383;0.003465113;0.0004455548;0.002594628;0.001307382;0.006007079;0.009358762;0.008093174	6.992316;6.192745;7.208282;7.730431;7.678689;9.072786;8.544488;8.896585;6.954417;5.98369;13.60196;3.873366;6.123167;7.923582;7.291454;3.114003;6.718338;3.55082;11.6588;18.82195;13.17449	175.117727702529;262.149357166849;391.1907538737;478.221905235707;577.289583186195;706.330200726352;821.356534070441;158.090996609704;245.122726803757;460.212283643134;461.192779870497;559.281285025958;688.321829713491;803.346622072585;475.229430699325;143.081058487421;386.200815464283;368.191538023707;515.239996108959;497.226079739723;614.306323930893	21	0.4690215	0.2625
20140904-PurClathDigest-1ug-01	2556	178	0	AAKDEVSESRR	11	2	Unmodified	_AAKDEVSESRR_					0	0	0	P02548	3	HCD	FTMS	MULTI-MSMS	5	0	416.54947	1246.6266	0.31953	-5.4600922	30.31	0.00054758	142.08	107.82	NaN	NaN	1	0	0	0	-1	0	0	0	0	y1;y3;y4;y5;y6;y7;y8;y9;y10;y1-NH3;y3-NH3;y4-NH3;y5-H2O;y5-NH3;y6-NH3;y7-H2O;y7-NH3;y8-NH3;y9-NH3;y10-H2O;b2;b4;b5;b9;b9(2+)	974980.6;1275262;118936.9;767400.7;1321711;3497699;8454006;4278766;2159247;30535.1;298996.8;191141.6;68575.5;1226574;435140.2;687258.9;158347.7;671034.1;1760041;191737.2;467473.8;136686;82502.5;44851.3;72241	0.0008607127;0.00188085;0.002468348;0.003357863;0.003292748;0.00486983;0.005210984;0.005907223;0.005955435;0.0009644334;0.001451972;0.002461431;-0.0009937804;0.003762812;0.003750246;0.00476175;0.004361419;0.00268998;0.004323218;0.0151098;0.0007023576;0.0057125;0.004382145;-0.01493275;0.002005731	4.915042;4.496949;4.510111;5.293614;4.489753;5.646619;5.331151;5.343226;5.061603;6.100479;3.618855;4.641882;-1.61245;6.095633;5.235106;5.639062;5.158958;2.800792;3.971616;13.04175;4.908818;14.79165;8.505029;-16.27662;4.367764	175.118091468298;418.250210769143;547.292216366644;634.323355261874;733.391834293355;862.432850307709;977.459452184825;1105.55371896396;1176.59078454036;158.091438646105;401.224090545611;530.265674182819;616.317142219277;617.296401211302;716.364827693442;844.422393701056;845.406809617366;960.435424088229;1088.52875386719;1158.57106549144;143.080801684581;386.197697591953;515.241621043539;917.4359…	25	0.8010621	0.2192982
20140904-PurClathDigest-1ug-02	2298	78	0	AAKDEVSESRR	11	2	Unmodified	_AAKDEVSESRR_					0	0	0	P02548	3	HCD	FTMS	MULTI-MSMS	1	0	416.54947	1246.6266	-0.11722	-4.4974944	30.285	0.00092461	140.63	83.403	NaN	NaN	1	0	0	0	-1	0	0	0	0	y1;y2;y3;y4;y5;y6;y7;y8;y9;y10;y1-NH3;y2-NH3;y3-NH3;y4-NH3;y5-H2O;y5-NH3;y6-H2O;y6-NH3;y7-H2O;y7-NH3;y8-NH3;y9-NH3;y10-NH3;b2;b4;b5;b6;b9	582461.1;18838.7;829407.6;50587.8;548715.5;1020920;2189703;5239626;2798327;1433522;20176.5;23635.9;157570.4;141363.8;47137.3;720158.7;22352.4;230990.8;481299.6;83770.5;183416.2;1166712;77303.1;273823.6;100733.5;70567.2;15802.9;49337.7	0.0007582519;0.002355019;0.001245075;-0.003336347;0.002455126;0.002794009;0.003954076;0.004553984;0.005063022;0.005116397;0.0001240036;-6.621498E-05;0.002312691;0.003499723;0.001599112;0.003317523;0.007032508;0.004628367;0.004001537;0.005374264;0.002684576;0.003278554;-0.001591406;0.0006341991;0.005514804;0.004236019;0.004809952;0.000575967	4.329944;7.110183;2.976862;-6.096034;3.870459;3.809706;4.584788;4.658998;4.579622;4.34849;0.7843746;-0.2107458;5.764101;6.599956;2.594636;5.374275;9.830485;6.460916;4.738782;6.357023;2.795166;3.01191;-1.372408;4.432452;14.27974;8.22142;7.82985;0.6278114	175.118193929076;331.21770819051;418.25084654375;547.298021062593;634.324257999098;733.392333031836;862.433766061864;977.460109184975;1105.55456316482;1176.59162357845;158.09227907593;314.193580322573;401.223229826204;530.26463589047;616.314549326697;617.296846500298;715.377529846565;716.363949572626;844.423153913681;845.405796771504;960.435429491842;1088.52979853197;1159.57178227923;143.08086984…	28	0.797681	0.231405
20140904-PurClathDigest-1ug-03	2165	66	0	AAKDEVSESRR	11	2	Unmodified	_AAKDEVSESRR_					0	0	0	P02548	3	HCD	FTMS	MULTI-MSMS	6	0	416.54947	1246.6266	0.14653	-3.775546	30.28	0.00060675	145.09	114.75	NaN	NaN	1	0	0	0	-1	0	0	0	0	y1;y2;y3;y4;y5;y6;y7;y8;y9;y10;y1-NH3;y3-NH3;y4-NH3;y5-H2O;y5-NH3;y6-H2O;y6-NH3;y7-H2O;y7-NH3;y8-H2O;y8-NH3;y9-NH3;y10-H2O;y10-NH3;b2;b4;b4-H2O;b5;b6;b9	412468.6;11718.5;572689.9;44932.9;371308.4;617122.5;1559782;3833846;2090863;1076834;11665.2;127823.4;123715.9;36715.5;563467.4;6652.9;182458.3;270951.9;71959.6;12918.7;321419.2;870467.1;41275.9;83308.9;199256.6;39718.3;25805.4;29180.2;9235.2;41347.3	0.0006991614;0.002566761;0.001357718;0.001803102;0.002995827;0.00269249;0.004015169;0.004348987;0.004609276;0.004985387;0.0005992315;0.001474298;0.00222815;0.001600733;0.002869822;0.006426847;0.002805871;0.004398901;0.004201588;0.002696168;0.0008434657;0.003121358;0.01152304;0.002042335;0.0004920203;0.001934082;-0.003015955;0.005640669;0.003357826;-0.009584786	3.99251;7.749473;3.246181;3.294583;4.722867;3.671281;4.655626;4.449273;4.169197;4.237143;3.790402;3.6745;4.201948;2.597266;4.649011;8.983846;3.916814;5.209358;4.9699;2.810115;0.8782101;2.867498;9.94588;1.761289;3.438754;5.00796;-8.19117;10.94765;5.466003;-10.44742	175.118253019537;331.217496447946;418.250733901163;547.29288161331;634.323717298637;733.392434551459;862.433704969045;977.460314182404;1105.55501691121;1176.5917545882;158.091803848027;401.224068219575;530.265907463851;616.314547705682;617.29729420175;715.378135508553;716.365772068509;844.422756550797;845.406969447645;959.451402314851;960.437270602336;1088.52995572808;1158.57465224363;1159.568148…	30	0.7850433	0.1923077
20140904-PurClathDigest-1ug-01	8844	5680	0	AALLELWELR	10	0	Unmodified	_AALLELWELR_					0	0	0	E1BFB0	2	HCD	FTMS	MULTI-MSMS	5	0	607.35061	1212.6867	-0.29902	-2.8130026	54.472	0.00033366	125.75	104.2	NaN	NaN	1	0	0	0	-1	0	0	0	0	y1;y2;y3;y4;y5;y6;y7;y8;y9;y1-NH3;y2-NH3;y3-NH3;y4-NH3;y5-NH3;y6-H2O;y7-H2O;b2;b3;b4;b5	55316.6;87952.6;30556.4;120288.3;176031;292610.6;205948.9;48170.4;9365.7;8241;25194.6;4857;8906;3241.4;21689.6;5862.7;59634.6;133300.2;7804.4;4721.5	0.000719637;0.001582552;0.002290095;0.002776108;0.003910296;0.004546649;0.006351033;0.00869159;0.005668889;0.000631656;0.002054769;0.003153868;0.004754949;0.005770377;0.004508416;0.004220056;0.0006526674;0.001346993;0.0006809234;0.006754292	4.109435;5.491133;5.488633;4.601369;5.458219;5.377804;6.62581;8.11077;4.961172;3.995502;7.577295;7.880417;8.110185;8.250743;5.448655;4.486935;4.561528;5.258317;1.844077;13.55506	175.118232543962;288.201433608912;417.243319162267;603.322146103343;716.405075895857;845.447032638682;958.529292234855;1071.61101565795;1142.65115214757;158.091771423442;271.17441229132;400.215906287747;586.293618160323;699.37666671242;827.436506185649;940.520858525918;143.080851374807;256.164221030014;369.248951079594;498.285470807703	20	0.7146487	0.2631579
20140904-PurClathDigest-1ug-03	7957	5134	0	AALLELWELR	10	0	Unmodified	_AALLELWELR_					0	0	0	E1BFB0	2	HCD	FTMS	MULTI-MSMS	6	0	607.35061	1212.6867	-1.6163	-4.6271563	55.051	0.0002195	137.98	119.35	NaN	NaN	1	0	0	0	-1	0	0	0	0	y1;y2;y3;y4;y5;y6;y7;y8;y9;y1-NH3;y2-NH3;y3-NH3;y4-NH3;y5-NH3;y6-H2O;y6-NH3;y7-NH3;b2;b3;b4;b5	40504.1;60568.3;21893.7;76415.2;117300.5;183688.2;138936.1;39418.3;4146.5;8566.6;15344.8;4006.1;6464.1;1846.4;17532.7;2646.6;2435.7;39153;85477;5797.1;4289.7	0.001153769;0.001682641;0.00144042;0.003896476;0.004396757;0.005699386;0.006164521;0.007056124;0.004478329;0.0006814119;0.001841454;-0.00287824;0.0006237699;0.005067104;0.004113228;0.01475572;0.01492532;0.0008321634;0.001483159;0.002152243;0.006126026	6.588532;5.838422;3.452223;6.45838;6.137254;6.741278;6.431227;6.584585;3.91924;4.310231;6.790658;-7.19161;1.063913;7.245164;4.971047;17.81209;15.85281;5.816044;5.789878;5.828728;12.29419	175.117798411692;288.201333520325;417.244168837845;603.321025734657;716.404589434874;845.445879902003;958.529478747009;1071.61265112446;1142.65234270691;158.091721667632;271.174625605659;400.221938396247;586.297749339705;699.377369986652;827.436901373778;828.410274466617;941.494168842173;143.080671878755;256.164084863792;369.247479759927;498.286099073162	21	0.7294353	0.28
20140904-PurClathDigest-1ug-02	3509	1138	0	AAMGELYER	9	0	Oxidation (M)	_AAM(ox)GELYER_		AAM(1)GELYER		AAM(119.75)GELYER	0	0	1	F1MSQ6	2	HCD	FTMS	MULTI-MSMS	4	0	528.24495	1054.4753	0.17837	-7.1105372	35.53	0.011558	119.75	104.54	119.75	1	1	0	0	0	-1	0	0	0	0	y1;y2;y3;y4;y5;y6;y7;y8;y1-NH3;y2-NH3;y3-NH3;y4-H2O;y4-NH3;y5-H2O;y6-H2O;y6-NH3;y7-H2O;y7-NH3;b2;b3;b4;b5	785116.8;362781.1;1046402;1627144;591816.1;4119829;463330.4;29594.2;88092.3;164087.8;251049.3;8157.6;78632;125177.4;93577;112577.5;31286.9;145027.8;667778.8;195362.3;40690.3;24212.8	0.001059088;0.001771792;0.003187552;0.003497787;0.004588166;0.004719973;0.005238885;-0.002613047;0.001047947;0.00168752;0.002626229;0.01016872;0.004008763;0.005868952;0.004948949;-0.002651836;0.01123508;0.005672883;0.0007977118;0.00162556;0.002287322;0.00449236	6.047859;5.8252;6.822355;6.027493;6.468155;6.158883;5.735567;-2.654327;6.628741;5.877131;5.833527;18.08453;7.116841;8.489302;6.613081;-3.538853;12.54774;6.328685;5.575258;5.603152;6.589121;9.434234	175.117893092727;304.159773485599;467.221686263234;580.305440008977;709.34694272574;766.368274643116;913.403154958828;984.448120678955;158.091355132919;287.133308655801;450.195698485445;562.288204389922;563.278379931636;691.335097253335;748.357480980753;749.349097350612;895.386594082547;896.376171859659;143.080706330351;290.115277710555;347.136079672403;476.176467730241	22	0.553996	0.1456954
20140904-PurClathDigest-1ug-03	3313	1070	0	AAMGELYER	9	0	Oxidation (M)	_AAM(ox)GELYER_		AAM(1)GELYER		AAM(104.01)GELYER	0	0	1	F1MSQ6	2	HCD	FTMS	MULTI-MSMS	2	0	528.24495	1054.4753	0.61454	-7.8692084	35.434	0.032953	104.01	88.132	104.01	1	1	0	0	0	-1	0	0	0	0	y1;y2;y4;y5;y6;y7;y8;y1-NH3;y2-NH3;y4-H2O;y4-NH3;y5-H2O;y6-H2O;y6-NH3;y7-H2O;y7-NH3;b2;b3;b4;b5	578776.8;257589.9;1171091;455791.4;3006268;340140.3;26758.2;62019.7;128777.9;11890.4;43433.7;99211.9;69711.9;84614.6;17632.1;105755.6;460502.2;124102.2;26566.6;15729.4	0.001014799;0.001608909;0.003224334;0.00413634;0.004276596;0.004942331;0.01032548;0.0008603765;0.001448901;0.001293942;0.003789194;0.006004144;0.005060026;-0.0009991601;0.007798067;0.002460604;0.0007494092;0.001759562;0.002072218;0.004663157	5.794948;5.289681;5.556267;5.831191;5.580338;5.410895;10.48874;5.442268;5.046086;2.301171;6.727033;8.684855;6.761511;-1.333374;8.709128;2.745047;5.237666;6.065047;5.969465;9.792922	175.117937381694;304.159936368145;580.305713462272;709.347394552501;766.368718019325;913.40345151325;984.4351821497;158.091542702965;287.133547275037;562.297079167792;563.278599500465;691.334962062247;748.357369902812;749.347444674332;895.390031090861;896.379384138873;143.080754632977;290.115143708421;347.136294776104;476.176296932791	20	0.486139	0.1212121
20140904-PurClathDigest-1ug-01	3552	1049	0	AATASPPTDGTSGYSAR	17	0	Unmodified	_AATASPPTDGTSGYSAR_					0	0	0	F1N3M8;G3MYP5	2	HCD	FTMS	MULTI-MSMS	1	0	805.37627	1608.738	0.045704	-5.9246269	34.184	0.00038506	77.221	63.475	NaN	NaN	1	0	0	0	-1	0	0	0	0	y1;y2;y3;y5;y6;y7;y8;y9;y10;y11;y12;y13;y14;y11-H2O;y12-H2O;y13-H2O;y11(2+);y12(2+);b2;b3;b3-H2O;b5;b5-H2O;b14	72672.5;15807.1;35901.2;33031.1;79840.3;32396.7;717049.1;222298.8;251285.7;908390;1534832;359289;96933.4;39317.9;227088.5;26440;421843.5;1613012;67958.4;172169.1;268885.7;33896.3;114820.8;26440	0.001387988;0.0006591707;4.077939E-05;0.002271141;0.006582684;0.002505212;0.005330271;0.004417398;0.00751562;0.006993175;0.00817693;0.006279575;0.02151121;0.009000528;0.01980368;0.01226219;0.004084793;0.003923617;0.0008348606;0.001292027;0.001259557;-0.0008484367;0.001977628;0.001028803	7.926036;2.677864;0.1223915;4.104937;10.28065;3.379256;6.676453;4.836233;7.408631;6.291687;6.765924;4.846922;15.74066;8.231071;16.63443;9.598108;7.343444;6.487711;5.834895;5.29242;5.57037;-2.109494;5.147583;0.8052856	175.11756419273;246.155406798049;333.188053599307;553.270615499813;640.298332366;741.350088312697;798.368726976933;913.396582881665;1014.44116313445;1111.49444943157;1208.54602952818;1295.57995529305;1366.60183744322;1093.48187739262;1190.52383809054;1277.56340799021;556.250274743704;604.776817844966;143.080669181577;244.127890488864;226.117358272615;402.199173150709;384.18578239941;1277.56340799…	24	0.7313877	0.2875
20140904-PurClathDigest-1ug-02	3243	905	0	AATASPPTDGTSGYSAR	17	0	Unmodified	_AATASPPTDGTSGYSAR_					0	0	0	F1N3M8;G3MYP5	2	HCD	FTMS	MULTI-MSMS	2	0	805.37627	1608.738	0.64117	-3.5625269	34.385	5.2812E-08	137.61	123.53	NaN	NaN	1	0	0	0	-1	0	0	0	0	y1;y2;y3;y4;y5;y6;y7;y8;y9;y10;y11;y12;y13;y14;y9-H2O;y10-H2O;y11-H2O;y12-H2O;y12-NH3;y11(2+);y12(2+);b2;b3;b3-H2O;b4;b4-H2O;b5;b5-H2O;b14;b14(2+)	9131;2610.4;2905.1;2314;5201.7;8087.1;4143;77502.5;25836.6;27811.1;91473.7;172074.5;37807.4;7675.8;2507.8;3904.1;5289.5;15190.2;10123;44336;169548.2;7998.5;22922.5;29820.6;4341.5;17893.5;5135.3;13523.4;3904.6;1813.8	0.001182696;0.0003463672;0.001578322;-0.002792584;-0.004811625;0.003701001;0.007735709;0.005271406;0.003170348;0.004347127;0.007152329;0.006438848;0.007196427;0.00527973;0.003828478;0.007195509;0.003866882;0.008254908;0.00653404;0.003157321;0.003435153;0.0007650245;0.001189384;0.001211996;0.004769468;0.002002268;0.004023229;0.001842929;0.01815551;-0.004162212	6.753717;1.407106;4.737051;-5.627325;-8.696582;5.780094;10.4347;6.60272;3.470939;4.28523;6.434877;5.327756;5.554603;3.863354;4.275782;7.221282;3.536285;6.933778;5.48378;5.67607;5.68003;5.346803;4.871971;5.360028;15.13341;6.738155;10.0032;4.796971;14.21124;-6.510679	175.117769484993;246.155719601542;333.186516057157;496.254215500702;553.277698265791;640.301214049314;741.344857815926;798.368785842473;913.397829932393;1014.4443316271;1111.49429027757;1208.54776761022;1295.57903844156;1366.61806892642;895.386607115882;996.430918558783;1093.48701103807;1190.53538686441;1191.52112331614;556.251202215456;604.777306309197;143.080739017769;244.12799313189;226.117405…	30	0.7687837	0.3225806
20140904-PurClathDigest-1ug-03	3069	857	0	AATASPPTDGTSGYSAR	17	0	Unmodified	_AATASPPTDGTSGYSAR_					0	0	0	F1N3M8;G3MYP5	2	HCD	FTMS	MULTI-MSMS	6	0	805.37627	1608.738	0.34245	-3.93549	34.39	3.1609E-08	153.72	132.92	NaN	NaN	1	0	0	0	-1	0	0	0	0	y1;y2;y3;y4;y5;y6;y7;y8;y9;y10;y11;y12;y13;y14;y15;y9-H2O;y10-H2O;y11-H2O;y11-NH3;y12-H2O;y12-NH3;y13-H2O;y11(2+);y12(2+);b2;b3;b3-H2O;b4;b4-H2O;b5;b5-H2O;b6;b14;b14(2+)	8225.4;1345.2;3962.8;1746.2;4818.6;8030.4;2692.1;70457.7;26743.9;23173.9;78797.4;146280.6;31946.3;7772.7;1330.2;1561.4;2835.6;5263.6;2392.3;13857.7;5674.7;4285.1;36629.9;151576.8;7738.1;20581.1;24565.1;4588.9;16955.7;6580.2;11046.4;1395;4285.1;1151	0.001488305;0.0004143972;0.003920884;0.003285612;0.004744468;0.005447536;0.00653305;0.005318046;0.005910984;0.007996875;0.008225208;0.008026533;0.008967574;0.01496578;0.01227443;-0.009996396;0.001601387;0.006177233;0.0008647706;0.005902242;0.007342888;0.01777717;0.004503165;0.004103913;0.0009731043;0.001569088;0.001330872;0.00389395;0.002661656;0.002231653;0.002525057;0.005931302;0.006543784;0.00…	8.498895;1.683476;11.76792;6.620904;8.57535;8.507794;8.812416;6.661139;6.471443;7.883039;7.400143;6.641478;6.921682;10.95104;8.36327;-11.16416;1.607114;5.649126;0.7901243;4.957627;6.162621;13.91496;8.095579;6.785832;6.801095;6.427326;5.885758;12.35538;8.957189;5.548669;6.572498;11.88054;5.122104;12.60521	175.117463876142;246.15565157161;333.184173494405;496.248137305483;553.268142172962;640.299467514138;741.346060474811;798.368739202711;913.395089296625;1014.44068187963;1111.49321739829;1208.54617992588;1295.57726729489;1366.60838287089;1467.65875270507;895.40043198976;996.436512681245;1093.48470068712;1094.47402873422;1190.53773952952;1191.52031446898;1277.55789300911;556.249856371357;604.776637…	34	0.7621449	0.3235294
20140904-PurClathDigest-1ug-01	3188	731	0	AAVTDVQR	8	0	Unmodified	_AAVTDVQR_					0	0	0	Q0P5A1	2	HCD	FTMS	MULTI-MSMS	5	0	430.23524	858.45593	0.57127	-6.1541576	32.765	0.027448	89.752	30.835	NaN	NaN	1	0	0	0	-1	0	0	0	0	y1;y4;y5;y6;y7;y1-NH3;y4-H2O;y4-NH3;y6-H2O;y6-NH3;y7-H2O;y6(2+);b2;b4	376830.3;299908.1;23445.3;519018.4;103547.2;33692.2;25759;63745.8;35333.2;17430.9;4420.9;10807.9;214659.3;21949	0.00108085;0.003272725;0.005800764;0.004443922;0.004932678;0.0007810951;0.004143878;0.003910398;0.005668863;0.00509492;-0.00500154;-0.0001353871;0.0007952058;0.004823295	6.172127;6.326922;9.381572;6.194616;6.2564;4.940775;8.30007;7.817005;8.105639;7.274744;-6.491961;-0.3769148;5.557743;14.05419	175.117871331368;517.269613915946;618.314764350612;717.38453510931;788.421160140254;158.091621984362;499.258178076353;500.242427141507;699.37274548196;700.357335009155;770.42052967249;359.198263135904;143.080708836434;343.192773137158	14	0.3357848	0.1555556
20140904-PurClathDigest-1ug-02	2917	620	0	AAVTDVQR	8	0	Unmodified	_AAVTDVQR_					0	0	0	Q0P5A1	2	HCD	FTMS	MULTI-MSMS	4	0	430.23524	858.45593	0.085361	-5.6882048	32.924	0.057181	75.692	18.411	NaN	NaN	1	0	0	0	-1	0	0	0	0	y1;y4;y5;y6;y7;y1-NH3;y4-H2O;y4-NH3;y6-H2O;y6-NH3;y7-H2O;y7-NH3;y6(2+);b2;b4	307401.1;219149.1;42937.6;429700.6;82797;24222.3;25552.9;47507.1;28859.6;8389;2124;1734.2;6633.5;162099.1;15122.2	0.001099574;0.003415274;0.004648049;0.004742281;0.004432742;0.0008350193;0.004572755;0.002532348;0.003277302;0.00705576;0.004069298;-0.00131291;0.0009536638;0.0008426087;0.005742367	6.27905;6.602504;7.517272;6.610518;5.622298;5.281871;9.159107;5.062227;4.686044;10.07454;5.28198;-1.701981;2.654987;5.889047;16.73224	175.117852607221;517.269471366861;618.315917065133;717.384236749659;788.421660077373;158.091568060201;499.25774919919;500.243805191355;699.375137042197;700.355374169349;770.411458834156;771.400856626932;359.197174084933;143.080661433441;343.191854065114	15	0.3458026	0.1530612
20140904-PurClathDigest-1ug-03	2762	588	0	AAVTDVQR	8	0	Unmodified	_AAVTDVQR_					0	0	0	Q0P5A1	2	HCD	FTMS	MULTI-MSMS	3	0	430.23524	858.45593	0.058424	-7.3190398	32.981	0.050671	78.77	20.166	NaN	NaN	1	0	0	0	-1	0	0	0	0	y1;y4;y5;y6;y7;y1-NH3;y4-H2O;y4-NH3;y6-H2O;y6-NH3;y7-H2O;y7-NH3;y6(2+);b2;b4	293985.6;225167.6;31679.8;430306.3;76612;24807.6;21071.8;47390;28985.7;12661.5;2610.8;2955.9;8039.5;162288.6;18645	0.001159104;0.003559122;0.004481492;0.004917576;0.00530016;0.001245552;0.003480928;0.003782095;0.005013956;0.003553458;-8.096151E-05;0.007329618;0.00335143;0.0008633292;0.005154756	6.618994;6.880597;7.247898;6.854873;6.722502;7.878692;6.972191;7.560522;7.169212;5.073767;-0.1050881;9.501804;9.330398;6.033864;15.02002	175.117793077402;517.269327518872;618.316083622906;717.384061454677;788.420792658736;158.091157527954;499.258841025948;500.242555444467;699.373400388502;700.358876471797;770.41560909391;771.39221409915;359.194776318887;143.080640712969;343.192441676785	15	0.3467501	0.1630435
20140904-PurClathDigest-1ug-01	8406	5297	0	ADDPSSYMEVVQAANTSGNWEELVK	25	0	Unmodified	_ADDPSSYMEVVQAANTSGNWEELVK_					0	0	0	P49951;F1MPU0	2	HCD	FTMS	MULTI-MSMS	7	1	1370.624	2739.2334	0.21485	-6.7693631	52.765	0.00032281	88.976	88.647	NaN	NaN	1	0	0	0	-1	0	0	0	0	y1;y2;y4;y5;y6;y8;y9;y11;y12;y13;y14;y15;y16;y14-NH3;b3;b6;b6-H2O;b7;b7-H2O;b8;b9;b9-H2O;b10	5261.6;2588.9;7858.2;4588.9;4211.5;8049.8;5963.9;6553.3;10509.6;11832.8;7996.4;20775.3;6367.4;3280.3;3976.5;4149.9;4925.1;10383;5487.2;6752.9;13138.9;4931.1;5870.7	0.0006437559;0.002682266;0.0007966254;-0.001670841;-0.002094167;0.007112814;-0.01052925;-0.01160926;0.005620568;-0.005016771;-0.002507732;0.002896584;-0.02457799;-0.009617868;0.004586647;0.01136947;0.004273164;0.0008108385;0.008225781;0.002902731;0.01079333;0.004599336;0.002437884	4.375953;10.89561;1.631403;-2.706464;-2.606527;7.299034;-9.918875;-9.093689;4.170649;-3.536185;-1.621289;1.759969;-14.08553;-6.287287;15.18286;19.83496;7.696617;1.101267;11.45238;3.346798;10.83286;4.701133;2.225509	147.112160414722;246.178535820408;488.307078537946;617.352139100921;803.431875379629;974.487059570306;1061.53673004378;1276.62841597709;1347.64829993484;1418.69605106177;1546.75211953419;1645.81512913441;1744.91101762275;1529.73268056818;302.093689671439;573.203727517523;555.200259140224;736.277614689994;718.259635061416;867.316007403318;996.350709902229;978.346339208626;1095.42747926346	23	0.4211513	0.2771084
20140904-PurClathDigest-1ug-02	7758	4856	0	ADDPSSYMEVVQAANTSGNWEELVK	25	0	Unmodified	_ADDPSSYMEVVQAANTSGNWEELVK_					0	0	0	P49951;F1MPU0	2	HCD	FTMS	MULTI-MSMS	5	1	1370.624	2739.2334	-0.17789	-5.3821136	52.831	0.0094712	74.222	74.222	NaN	NaN	1	0	0	0	-1	0	0	0	0	y1;y2;y3;y4;y5;y6;y8;y9;y10;y11;y12;y13;y14;y15;y10-H2O;y14-NH3;b3;b7;b7-H2O;b8;b9;b10;b10(2+)	3332.4;2330.7;1765.8;4506.5;3873.4;2028.8;1950.3;3265.2;2619.2;4588.7;3686.5;11305.2;2709.1;4748.8;1984.5;4657.9;2861.5;8774.7;4740.6;2244.3;3788.2;2958.9;1616.7	0.0006876829;0.0007752043;0.0009937395;0.00358618;0.003979392;-0.0006434966;0.003874215;-0.002769095;0.005065146;0.01153579;0.02309117;0.01001868;0.01106702;0.02950474;-0.01307564;0.01360045;0.0019118;0.009296684;-0.0005004629;0.002441129;0.004806935;0.006367294;-0.00603898	4.67455;3.148927;2.76604;7.34415;6.445962;-0.8009363;3.975632;-2.608591;4.356857;9.036304;17.13464;7.06197;7.155067;17.92742;-11.424;8.890869;6.328444;12.62675;-0.6967631;2.814577;4.824512;5.812632;-11.01552	147.112116487675;246.180442882506;359.26428832778;488.304288983544;617.346488867872;803.430424709665;974.490298169162;1061.52896988918;1162.56881412184;1276.60527092142;1347.63082933604;1418.68101560739;1546.73854478434;1645.78852097975;1144.57639021984;1529.7094622533;302.09636451836;736.26912884491;718.268361305109;867.316469005951;996.356696295739;1095.42354985346;548.2246357866	23	0.3489726	0.2804878
20140904-PurClathDigest-1ug-02	6950	4149	0	ADDPSSYMEVVQAANTSGNWEELVK	25	0	Oxidation (M),Deamidation (NQ)	_ADDPSSYM(ox)EVVQAAN(de)TSGNWEELVK_	ADDPSSYMEVVQ(0.059)AAN(0.919)TSGN(0.022)WEELVK	ADDPSSYM(1)EVVQAANTSGNWEELVK	ADDPSSYMEVVQ(-11.92)AAN(11.92)TSGN(-16.13)WEELVK	ADDPSSYM(62.19)EVVQAANTSGNWEELVK	0	1	1	P49951;F1MPU0	2	HCD	FTMS	MULTI-MSMS	5	0	1379.1134	2756.2123	0.69759	-359.2151	49.511	0.027634	62.193	61.665	62.193	1	3	0	0	0	-1	0	0	0	0	y1;y2;y3;y5;y6;y8;y9;y10;y11;y12;y14;y15;y16;y14-H2O;b6;b7;b7-H2O;b8;b9	1578.4;2108.6;1987.3;5552.5;4338.7;2887.7;3761.5;6804.7;8794.6;10040.5;3887.1;11958.9;2948.5;10014.8;1573.2;4486.9;4273.3;4797;3282.6	2.388279E-05;0.002091203;-0.002050519;0.001153889;0.00716401;-0.008287838;0.003079544;0.01372948;0.009783555;0.01496256;-0.005342255;-0.002580596;-0.03123191;0.01887577;0.00675618;0.008096835;0.004492568;-0.001629225;0.008280581	0.1623434;8.494639;-5.707503;1.869103;8.916864;-8.504686;2.901062;11.8097;7.657814;11.0947;-3.451651;-1.567032;-17.8887;12.33949;11.7866;10.9971;6.254765;-1.844443;8.179579	147.112780287814;246.17912688392;359.267332586665;617.349314370389;803.42261720299;974.502460221371;1061.52312124961;1162.56014978535;1277.59103874509;1348.62297352728;1547.73896964158;1646.80462189934;1745.90168713115;1529.70418692597;573.208340810141;736.270328693699;718.263368273816;883.315453981986;1012.34813727248	19	0.4341765	0.2923077
20140904-PurClathDigest-1ug-01	7481	4487	0	ADITDDSPDGKLPASSFSPTALLGEGR	27	1	Unmodified	_ADITDDSPDGKLPASSFSPTALLGEGR_					0	0	0	F1N3M8;G3MYP5	2	HCD	FTMS	MULTI-MSMS	2	1	1359.1669	2716.3192	1.6884	-2.6217115	49.173	0.021459	78.128	78.025	NaN	NaN	1	0	0	0	-1	0	0	0	0	y1;y2;y4;y5;y6;y9;y10;y11;y12;y13;y14;y15;y16;y17;y18;y20;y15-H2O;y20(2+);y25(2+);b3;b4;b4-H2O;b7;b7-H2O;b10;b11;b12;b12-H2O	4438.3;38486.4;37641.9;22504.8;9545.4;63421.8;45757.2;13013.9;34211.3;47136.1;20366.1;654962.1;157916.1;19429;58112.2;18089;38730;45757.2;5462.1;18972.4;4132.2;4022.9;9503;7299;6320.7;8476.6;81518.4;30050.6	0.0008632138;0.0009612821;0.002576641;0.004928085;0.006766662;0.006985669;0.0097059;-0.006717007;0.01866973;0.008811642;0.01475517;0.0101686;0.01166917;0.01284554;0.007891887;0.02599417;0.009644287;-0.00647548;-0.003498713;0.003627904;0.003650111;-0.001800015;0.006793311;0.003201191;0.01757799;0.003005912;0.0104946;-0.0002255407	4.929324;4.140968;6.161238;9.275808;10.50127;7.64712;9.700735;-5.853003;15.1218;6.667073;10.59467;6.825688;7.28032;7.421174;4.413913;12.99697;6.552963;-6.472034;-2.763294;12.0869;9.097996;-4.697395;9.457719;4.571332;17.80279;2.69472;8.542206;-0.1863112	175.118088967166;232.13945462257;418.201896083054;531.283608619751;644.365834023157;913.503171130497;1000.5324793085;1147.61731613243;1234.62395780384;1321.66584430271;1392.6970145642;1489.75436498556;1602.83692839905;1730.93071504566;1787.95713241953;2000.01873701684;1471.74432461159;1000.5324793085;1266.13833100568;300.151769362385;401.199425630132;383.194311069759;718.282196903771;700.27522433…	28	0.6660386	0.2673267
20140904-PurClathDigest-1ug-02	6918	4121	0	ADITDDSPDGKLPASSFSPTALLGEGR	27	1	Unmodified	_ADITDDSPDGKLPASSFSPTALLGEGR_					0	0	0	F1N3M8;G3MYP5	2	HCD	FTMS	MULTI-MSMS	5	1	1359.1669	2716.3192	1.3531	-5.9350188	49.369	0.023546	81.974	81.867	NaN	NaN	1	0	0	0	-1	0	0	0	0	y2;y4;y5;y6;y9;y10;y12;y13;y14;y15;y16;y17;y18;y15-H2O;y18(2+);y20(2+);y21(2+);b3;b4;b4-H2O;b7;b7-H2O;b11;b11-H2O;b12;b12-NH3	12545.8;13686.8;11977.8;7629.6;24757.7;26453.3;11233.7;17591.7;8674;249921.2;70681.6;2870.3;36636.4;10352;2310.3;26453.3;4050.8;5712.7;4687.1;1821.8;6882.8;6264.5;8290.8;3087.7;34642.3;3488.8	0.001252485;0.002631633;0.004654507;-0.0004613467;0.005491631;0.008283869;0.008974602;0.01898773;0.01303622;0.01183806;0.009259705;0.03003526;0.01292692;0.01455815;-0.01284091;-0.007897511;0.01944667;1.785199E-05;0.001059198;-2.228723E-05;0.005582993;0.003031925;-0.01381665;0.01279126;0.004160045;-0.0001644459	5.395405;6.292734;8.760866;-0.7159622;6.011607;8.279449;7.269041;14.36663;9.360403;7.946325;5.777063;17.35226;7.230014;9.891798;-14.35542;-7.893297;18.62668;0.05947582;2.640061;-0.05816196;7.772689;4.329618;-12.38607;11.65531;3.386101;-0.1357327	232.139163419815;418.201841091402;531.283882197632;644.373062031925;913.504665168435;1000.53390133985;1234.63365293226;1321.65566821183;1392.69873351172;1489.75269552515;1602.83933786075;1730.91352532245;1787.95209738729;1471.73941074955;894.498991294038;1000.53390133985;1044.02257135939;300.155379414814;401.20201654307;383.19253334183;718.283407221623;700.275393603577;1115.49894049253;1097.46176…	26	0.6992297	0.3205128
20140904-PurClathDigest-1ug-03	6710	4043	0	ADITDDSPDGKLPASSFSPTALLGEGR	27	1	Unmodified	_ADITDDSPDGKLPASSFSPTALLGEGR_					0	0	0	F1N3M8;G3MYP5	2	HCD	FTMS	MULTI-MSMS	7	1	1359.1669	2716.3192	0.72064	-1.5172758	49.654	0.011294	93.166	92.645	NaN	NaN	1	0	0	0	-1	0	0	0	0	y1;y2;y4;y5;y6;y7;y9;y10;y11;y12;y13;y14;y15;y16;y17;y18;y12-H2O;y15-H2O;y15-NH3;y18-NH3;y20(2+);y25(2+);b3;b4;b5;b7;b7-H2O;b10;b12;b12-H2O	4300;9952;15137.1;11359.2;4636.7;4640.2;26050.7;17384.4;5818;10598.1;14139.4;6018.9;230852.8;61967.2;2809.2;33702;1871;4046;4944.4;1639.3;17384.4;2390.5;3223;4339.7;1754.7;3639.5;4355.8;2329.5;33416.7;11425.8	-0.0003079378;0.0015059;0.003843755;0.003628984;0.002459984;0.007652055;0.01093004;0.0109808;0.008091404;0.007551393;0.01274671;0.017053;0.01137543;0.009091415;0.003725666;0.01249383;-0.000535769;-0.01549271;0.006864179;-0.02690736;-0.005200584;-0.02293206;0.00307439;0.0004359315;-0.003059248;0.008298504;0.0117942;-0.0148366;0.01437048;0.01683818	-1.758446;6.487064;9.191175;6.830581;3.817657;10.69616;11.96503;10.97497;7.050703;6.116295;9.644455;12.24461;7.635785;5.672069;2.152395;6.987787;-0.4403704;-10.52659;4.660851;-15.19361;-5.197824;-18.11153;10.24276;1.086562;-5.926099;11.55329;16.84245;-15.02585;11.69706;13.90963	175.119260118801;232.13891000463;418.200628969321;531.284907720424;644.370140700924;715.402062417834;913.499226757488;1000.53120441302;1147.60250772151;1234.63507614278;1321.66190923622;1392.69471673568;1489.75315814973;1602.8395061499;1730.93983491659;1787.95253047481;1216.63259861783;1471.76946161086;1472.7311203041;1770.96538256801;1000.53120441302;1266.15776435274;300.152322877243;401.2026398…	30	0.7020698	0.3536585
20140904-PurClathDigest-1ug-01	9346	6119	0	ADLEMQIESLTEELAYLKK	19	1	Oxidation (M)	_ADLEM(ox)QIESLTEELAYLKK_		ADLEM(1)QIESLTEELAYLKK		ADLEM(156.13)QIESLTEELAYLKK	0	0	1	CON__P13645	3	HCD	FTMS	MULTI-MSMS	3	1	747.38373	2239.1294	-0.11188	0.49341593	56.745	8.0676E-09	156.13	29.291	156.13	1	1	0	0	0	-1	0	0	0	0	y1;y2;y3;y4;y5;y6;y7;y8;y9;y10;y11;y12;y13;y14;y7-H2O;y8-H2O;y8-NH3;y9-H2O;y11-H2O;y11-NH3;y12-H2O;y14-H2O;y9(2+);y13(2+);y15(2+);a2;b2;b3;b4;b5;b6;b6-H2O;b7;b7-H2O;b8;b9;b9-H2O	34991.2;90090.9;63276.4;93942.6;112406.8;86257.7;102041.1;114112.5;190288.6;48874.6;107935.6;124686.9;33323.7;5092.6;19138;18027;4790.2;13356.4;6522.1;6098;27275.2;22490.8;11791;6906.1;4519.5;37802;63810.7;54826.4;22723.9;21895.9;45492.3;14651.4;32618.6;11948;16951;8411.1;12316.7	0.0006638515;0.001227012;0.001775142;0.002595016;0.002688634;0.002946592;0.003903518;0.002993165;0.006236718;0.01010086;0.003609698;0.004977359;0.00717438;0.01539681;0.004332921;0.008742032;3.69554E-05;-0.007647068;-0.01555119;-0.01151782;0.001322727;0.01317986;0.002999286;0.005870657;0.001381568;0.0006346793;0.0008615295;0.001422917;0.003362997;0.00542182;0.004037763;0.005047302;0.0040807;0.0041…	4.512554;4.458512;4.57169;4.706635;4.319857;4.006389;4.515269;3.01257;5.697699;8.363835;2.788011;3.495918;4.668252;9.247914;5.118606;8.961203;0.0378434;-7.102939;-12.18048;-9.014421;0.9409364;8.002893;5.475095;7.634901;1.52411;3.989792;4.605374;4.740624;7.835598;9.409158;5.733113;7.35462;4.992464;5.156064;-1.122699;1.19922;1.747856	147.112140319081;275.206540176499;388.290056027183;551.352564691429;622.389584860989;735.473390882971;864.515027053224;993.558530503072;1094.60296542385;1207.6831652589;1294.72168483348;1423.76291026986;1536.84477722911;1664.895132312;846.504032964718;975.542216949492;976.534937610697;1076.60628452352;1276.73028103106;1277.71026324771;1405.75600021495;1646.88678457416;547.805240018261;768.9237433…	37	0.5092753	0.2256097
20140904-PurClathDigest-1ug-02	8603	5595	0	ADLEMQIESLTEELAYLKK	19	1	Oxidation (M)	_ADLEM(ox)QIESLTEELAYLKK_		ADLEM(1)QIESLTEELAYLKK		ADLEM(107.15)QIESLTEELAYLKK	0	0	1	CON__P13645	3	HCD	FTMS	MULTI-MSMS	2	1	747.38373	2239.1294	0.52726	0.49341593	56.894	0.00016844	107.15	28.48	107.15	1	1	0	0	0	-1	0	0	0	0	y1;y2;y3;y4;y5;y6;y7;y8;y9;y10;y11;y12;y13;y7-H2O;y8-H2O;y12-H2O;y12-NH3;y15(2+);a2;b2;b3;b4;b5;b6;b6-H2O;b7;b7-H2O;b8	12368.1;26410.3;22723.3;27674.7;37429;25552.2;31421.5;37203.4;62855.3;12334;27251.3;32821.8;5699.4;2117.8;1547.2;5467.4;3401.8;2141.4;13372.2;20064.4;16672.5;8207.8;6314.3;12793.8;4029;10288.6;1570;4492.7	0.001050176;0.001598726;0.002297468;0.003052531;0.003936945;0.003657363;0.004918559;0.005277253;0.005125926;0.0135918;0.01118602;0.009399303;-0.009458818;0.002666139;0.0001689793;0.02333723;-0.008307083;-0.0001755353;0.0007694658;0.001169514;0.001462603;0.003366889;0.004712538;0.006408981;0.002649237;0.001244403;-0.0002417087;0.00472733	7.138628;5.809195;5.916893;5.536445;6.325544;4.972806;5.689392;5.311479;4.682905;11.25448;8.639761;6.601754;-6.154634;3.149581;0.1732143;16.60146;-5.90516;-0.1936456;4.837106;6.25174;4.872843;7.844668;8.178243;9.099975;3.860293;1.522438;-0.3023756;4.994992	147.111753994539;275.206168462156;388.289533701228;551.352107176235;622.388336549787;735.472680112634;864.514012012213;993.556246414281;1094.60407621526;1207.67967431817;1294.71410851128;1423.75848832512;1536.86141042747;846.505699746556;975.550790001965;1405.7339857096;1406.74964560944;906.476777942715;159.075649198548;187.070163772296;300.153934663658;429.194623473836;576.228677053378;704.28555…	28	0.4438119	0.2014388
20140904-PurClathDigest-1ug-03	3347	1100	0	AEAESLYQSK	10	0	Unmodified	_AEAESLYQSK_					0	0	0	CON__P04264	2	HCD	FTMS	MULTI-MSMS	4	0	563.27476	1124.535	1.4807	-5.2655144	35.576	0.00010361	160.53	113.34	NaN	NaN	1	0	0	0	-1	0	0	0	0	y1;y2;y3;y4;y5;y6;y7;y8;y9;y2-H2O;y3-H2O;y3-NH3;y4-H2O;y4-NH3;y5-NH3;y6-H2O;y7-H2O;y8-H2O;y8-NH3;y9-H2O;a2;b2;b2-H2O;b3;b9(2+)	36665.1;145267.6;146937.5;277031;82094.5;290310.5;124698.3;263753.2;7920;26288.9;97754.3;138360.6;16504.3;18470;3352.2;24314.8;46797.4;23795.8;14817.4;14053.8;699630.6;691252.5;34175;112350.6;26395.8	0.0009569689;0.00144573;0.00198733;0.003163594;0.003609623;0.004689531;0.004963967;0.006071954;0.01022862;0.001772571;0.002095781;0.002503787;0.002319998;0.004715068;-0.01034259;0.007998133;0.006008405;0.008544909;0.003681303;0.0004115372;0.001091398;0.001159427;0.0008624598;0.001692982;-0.004897316	6.505043;6.174551;5.486808;6.02287;5.65464;6.464947;5.809747;6.561037;9.700018;8.201318;6.08901;7.253689;4.573643;9.27733;-16.64577;11.30695;7.183574;9.416465;4.052369;0.3970473;6.305344;5.765831;4.71095;6.221399;-9.989896	147.111847201668;234.143386850314;362.201422762129;525.263575036042;638.347192987311;725.378141488868;854.42046014961;925.456465950816;1054.49490238142;216.132495322837;344.19074962472;345.174357202971;507.253853945968;508.235474460371;621.334596099014;707.364268201107;836.408851025478;907.443428309724;908.432307500451;1036.49415477726;173.09097733049;201.085823923698;183.075556204468;272.1224041…	25	0.7173635	0.2314815
20140904-PurClathDigest-1ug-01	4225	1638	0	AEALEQTIK	9	0	Unmodified	_AEALEQTIK_					0	0	0	F1N3M8;G3MYP5	2	HCD	FTMS	MULTI-MSMS	2	0	501.77694	1001.5393	0.30744	-5.8693167	36.843	0.00048025	143.7	92.511	NaN	NaN	1	0	0	0	-1	0	0	0	0	y1;y2;y3;y4;y5;y6;y7;y8;y4-H2O;y4-NH3;y5-H2O;y5-NH3;y6-H2O;y6-NH3;y7-H2O;y7-NH3;y8-H2O;y8-NH3;y6(2+);a2;b2;b2-H2O;b3	487335.2;244041.3;568060.3;469913.5;1259691;835588.2;1803313;128507.7;223623.5;222919.9;344110.6;43245.4;45118.5;25432.5;139065.3;22378.3;100554.8;11338.4;98680.7;3023083;2655755;110226.8;663253.8	0.0008394623;0.00145057;0.001523884;0.003378632;0.003651444;0.004416508;0.004733292;0.004818225;0.002157866;-0.0007976808;0.00339704;0.0003698768;0.003175254;0.001537217;0.002398748;-0.004165643;0.002514874;0.007368503;0.002800744;0.0009520995;0.0009507232;0.0008842939;0.001363767	5.706281;5.574924;4.218445;6.905035;5.905217;6.03822;5.898461;5.172518;4.578632;-1.689009;5.658604;0.6151094;4.450775;2.151755;3.057858;-5.303548;2.75302;8.057627;7.647799;5.500568;4.727942;4.830214;5.011587	147.111964708326;260.19541758126;361.243022741172;489.29974550451;618.342065788788;731.42536470546;802.46216170878;931.504669872248;471.290401584603;472.277372715734;600.331755506655;601.318798254364;713.416041272441;714.401694894456;784.453931566146;785.444511542285;913.49640853689;914.475570492874;366.215728095482;173.091116628975;201.086032627423;183.075534370371;272.122733371688	23	0.6310303	0.1965812
20140904-PurClathDigest-1ug-02	3868	1452	0	AEALEQTIK	9	0	Unmodified	_AEALEQTIK_					0	0	0	F1N3M8;G3MYP5	2	HCD	FTMS	MULTI-MSMS	3	0	501.77694	1001.5393	0.10082	-3.4730054	37.055	0.0004745	149.72	100.93	NaN	NaN	1	0	0	0	-1	0	0	0	0	y1;y2;y3;y4;y5;y6;y7;y8;y4-H2O;y4-NH3;y5-H2O;y6-H2O;y6-NH3;y7-H2O;y7-NH3;y8-H2O;y6(2+);a2;b2;b2-H2O;b3;b3-H2O	329801.9;202913.1;387149.4;321828;886287.6;580360.2;1299395;82006.1;128777.5;138786.6;247248.5;39934.3;9066.7;77913.7;36301.7;101691.2;34905.9;1918250;1631953;59375.2;437058.1;27023.4	0.0007493896;0.001021967;0.001577125;0.002348006;0.003539313;0.003996468;0.004222559;0.004672603;0.002355184;-0.0001116953;0.003372607;0.004475566;0.001660948;0.005277807;-0.002222244;0.005656634;0.002181976;0.0008363049;0.0008238864;0.0007384988;0.001312511;0.0009076474	5.094006;3.927682;4.365829;4.798697;5.723874;5.463942;5.262001;5.016188;4.997313;-0.236504;5.617905;6.273441;2.32495;6.728026;-2.829289;6.19231;5.95816;4.831584;4.097181;4.033844;4.823232;3.571831	147.112054780962;260.195846184405;361.24296950017;489.300776130136;618.342177920184;731.425784744996;802.462672441689;931.504815493763;471.29020426575;472.276686730322;600.331779939351;713.414740961305;714.401571163761;784.451052507573;785.442568143345;913.493266777355;366.21634686425;173.091232423574;201.086159464188;183.075680165497;272.122784627171;254.112624804742	22	0.6587218	0.1788618
20140904-PurClathDigest-1ug-03	3680	1391	0	AEALEQTIK	9	0	Unmodified	_AEALEQTIK_					0	0	0	F1N3M8;G3MYP5	2	HCD	FTMS	MULTI-MSMS	1	0	501.77694	1001.5393	-0.14027	-5.0705463	37.063	0.00047832	145.72	94.657	NaN	NaN	1	0	0	0	-1	0	0	0	0	y1;y2;y3;y4;y5;y6;y7;y8;y3-H2O;y4-H2O;y4-NH3;y5-H2O;y5-NH3;y6-H2O;y7-H2O;y7-NH3;y8-H2O;y6(2+);a2;b2;b2-H2O;b3;b3-H2O	173944;99230.7;207819.5;183322.5;470788.9;336736.2;709884.4;48351.6;17203.4;91372.3;118160;116379.3;18843.5;20164.4;42445.3;17425;45984.9;31067.2;1075675;941993.4;31871.4;240499.4;12220.4	0.0009171758;0.001659197;0.002126892;0.003275926;0.004264468;0.004597814;0.005338925;0.006759862;0.005630812;0.003137755;0.002719968;0.002999714;0.001688931;0.001722788;0.00488106;0.0006985939;0.006376997;0.003056622;0.001102422;0.001139464;0.001203105;0.00157351;0.002338361	6.234546;6.376741;5.887713;6.695131;6.896623;6.286103;6.653185;7.256943;16.40544;6.657809;5.759303;4.996758;2.808718;2.414838;6.222259;0.8894303;6.980896;8.346512;6.369031;5.666554;6.571644;5.78236;9.202119	147.111886994769;260.195208953532;361.242419733357;489.299848210086;618.341452764799;731.425183398785;802.46155607556;931.502728234654;343.228351127332;471.289421695473;472.27385506693;600.332152832108;601.317479200146;713.41749373916;784.45144925449;785.439647305538;913.49254641381;366.215472218144;173.090966306719;201.085843886793;183.075215559122;272.122523628034;254.111194090679	23	0.6743605	0.2035398
20140904-PurClathDigest-1ug-01	4003	1444	0	AEEVAPKEELAAEAK	15	1	Unmodified	_AEEVAPKEELAAEAK_					0	0	0	F1MDZ2;O77788	2	HCD	FTMS	MULTI-MSMS	4	0	792.90941	1583.8043	1.1758	-5.5687585	35.963	3.988E-05	133.9	85.505	NaN	NaN	1	0	0	0	-1	0	0	0	0	y1;y2;y3;y4;y5;y6;y7;y8;y9;y10;y11;y12;y13;y2-NH3;y3-H2O;y5-NH3;y7-H2O;y8-H2O;y8-NH3;y10-H2O;y11-H2O;y11-NH3;y12(2+);a2;b2;b3;b3-H2O;b4;b4-H2O;b5;b5-H2O;b8;b9;b10;b11;b12;b13	222721.4;349723.8;73487.8;110225.4;133526.5;97199.2;100596.5;216536.8;180593.2;1295436;577230.7;70769.3;52479.4;86967.5;99395.2;40238.8;8380.6;35728.1;7321;62982.5;17748.4;8113.7;25577;295313.8;841711.4;1021052;34083.4;264133.3;28909.7;42903.1;8741.2;16489.8;92006.8;57326.6;87212.4;51705.8;48844.9	0.0009675241;0.00122603;0.002540197;0.002771911;0.00230872;0.003960029;0.004902255;0.004801201;0.006508054;0.00769444;0.008255288;0.009365672;0.01318969;0.001329635;0.002425895;0.002970433;0.01031622;0.002495852;-0.002899629;0.002618921;-0.003323405;0.01319163;0.003579187;0.001121949;0.001096033;0.002245357;0.001224415;0.002754395;0.001633359;0.007617138;0.004023441;0.006898222;0.01261241;0.00444…	6.576793;5.620156;7.316446;6.62777;4.718757;6.574333;6.702669;5.579994;6.583605;7.087887;7.13747;7.458646;9.525176;6.611084;7.369519;6.29013;14.4612;2.962706;-3.437973;2.45316;-2.918818;11.57586;5.696215;6.481846;5.450572;6.801487;3.922928;6.417581;3.972314;15.22735;8.34357;8.073587;12.82459;4.053304;0.4845949;8.124064;-5.827831	147.111836646466;218.148691928718;347.189970857841;418.226852931008;489.264429910368;602.34684258193;731.388493451778;860.431187602134;988.524443766471;1085.57602123283;1156.61257417256;1255.67987770456;1384.71864678332;201.122039222263;329.179520473523;472.237219095396;713.372514797552;842.422928265059;843.412339330256;1067.57053206564;1138.61358817938;1139.58108872977;628.344680735235;173.09094…	37	0.6138475	0.2740741
20140904-PurClathDigest-1ug-01	4050	1485	0	AEEVAPKEELAAEAK	15	1	Unmodified	_AEEVAPKEELAAEAK_					0	0	0	F1MDZ2;O77788	3	HCD	FTMS	MULTI-SECPEP	3	0	528.94203	1583.8043	-0.69275	-348.77813	36.144	0.036167	72.315	40.701	NaN	NaN	1	0	0	0	-1	0	0	0	0	y1;y2;y3;y4;y5;y6;y7;y8;y9;y10;y11;y13;y2-NH3;y3-H2O;y9(2+);y12(2+);a2;b2;b3;b4	467637.8;394062.4;60655.8;116388.7;196211.5;74348.6;83341.9;349723.1;105726.6;1669396;768003.6;500622.8;185058.6;34193.5;102858.5;126303.9;849332.5;745530.9;172066;41643.3	0.00089209;0.001117783;0.002143128;0.003634444;0.003291082;0.002116689;0.001075753;0.003919949;0.006565794;0.006788566;0.007034224;0.01255325;0.001582892;0.003840009;-0.0002956594;0.008037153;0.001154043;0.001069073;0.003611152;-0.002616238	6.064023;5.123946;6.172776;8.690144;6.726605;3.514059;1.470829;4.555792;6.642015;6.253417;6.081739;9.065555;7.870316;11.66544;-0.5975701;12.79108;6.667266;5.316501;10.93871;-6.095605	147.111912080568;218.148800175779;347.190367926352;418.225990398573;489.263447548163;602.34868592199;731.39231995365;860.432068853506;988.524386026554;1085.57692710709;1156.61379523672;1384.7192832242;201.121785965015;329.178106359365;494.769409803037;628.340222768989;173.09091468526;201.085914277158;330.125965294625;429.2006066006	20	0.4693003	0.1652893
20140904-PurClathDigest-1ug-02	3650	1261	0	AEEVAPKEELAAEAK	15	1	Unmodified	_AEEVAPKEELAAEAK_					0	0	0	F1MDZ2;O77788	2	HCD	FTMS	MULTI-MSMS	1	0	792.90941	1583.8043	1.4293	-5.1899238	36.108	2.3323E-05	143.88	79.838	NaN	NaN	1	0	0	0	-1	0	0	0	0	y1;y2;y3;y4;y5;y6;y7;y8;y9;y10;y11;y12;y13;y2-NH3;y3-H2O;y5-NH3;y8-H2O;y10-H2O;y9(2+);y12(2+);y14(2+);a2;b2;b3;b3-H2O;b4;b4-H2O;b5;b9;b10;b11;b12;b13	117008.4;161745.9;23253.7;53323.6;55551;34942.6;43122;103663;63017.1;559708.8;243802.8;29479;35061.1;46495.7;40532.7;14382.8;11807.5;23944.3;14234.2;22915.9;7703;137152.5;400659.8;485910.8;11902.2;106363;11817.1;19489;26623.7;27783.3;17906.2;13160.9;13613.4	0.0009956666;0.00115762;0.002125672;0.002655002;0.004525881;0.003990701;0.006678321;0.003778728;0.01020878;0.007704252;0.005189279;0.005517615;0.01534101;0.001132473;0.002376021;-0.0004968368;0.004445973;0.004481699;-5.138266E-05;0.004773939;-0.004313075;0.001121209;0.001065297;0.002334625;0.002547635;0.002542978;0.004711403;0.006478689;-0.005654146;0.003082637;-0.00289667;0.01806917;-0.001569572	6.768095;5.306561;6.122498;6.348233;9.250421;6.625255;9.13104;4.391663;10.32733;7.096925;4.486607;4.394112;11.07881;5.630772;7.218009;-1.052084;5.277614;4.198043;-0.1038518;7.597658;-5.694616;6.47757;5.297719;7.071894;8.162452;5.924989;11.45817;12.95146;-5.749158;2.811216;-2.480892;14.58829;-1.147624	147.111808504013;218.148760338617;347.190385382416;418.226969840405;489.262212749146;602.346811909482;731.386717385345;860.432210074483;988.520743036415;1085.5760114206;1156.61564018118;1255.68372576225;1384.71649546483;201.122236383395;329.17957034725;472.240686365536;842.420978143677;1067.56866928722;494.769165526315;628.343485982933;757.395166092803;173.090947519726;201.085918053733;330.127241…	33	0.6123716	0.2946429
20140904-PurClathDigest-1ug-03	3505	1238	0	AEEVAPKEELAAEAK	15	1	Unmodified	_AEEVAPKEELAAEAK_					0	0	0	F1MDZ2;O77788	2	HCD	FTMS	MULTI-SECPEP	2	0	792.90941	1583.8043	1.8821	-348.79299	36.253	0.059947	49.988	18.668	NaN	NaN	1	0	0	0	-1	0	0	0	0	y1;y2;y5;y8;y10;y11;y10(2+);y11(2+);y12(2+);y13(2+);a2;b2;b3;b4;b5;b13;b11(2+)	521533.6;441698.1;46630.3;437839.5;746059.4;338874.4;280519.9;136328;62610.8;129261.3;37351.3;301998.7;471535.2;140861.9;59665;54711.8;30739.7	0.00101769;0.0007926449;-0.003672647;-0.003982417;0.007788827;0.009921252;0.005853827;0.004211697;0.01031638;0.001124451;0.002044162;0.0007242046;0.002572236;-0.0005565539;-0.00787937;0.009971366;0.005133476	6.917803;3.6335;-7.506375;-4.62835;7.174834;8.577865;10.77478;7.276478;16.41852;1.622893;11.80982;3.601462;7.791656;-1.296728;-15.75109;7.290828;8.785789	147.111786480156;218.149125313466;489.270411277226;860.439971220468;1085.57592684544;1156.61090820891;543.289642242512;578.80984126606;628.337943541732;692.868432018594;173.090024566471;201.086259145994;330.127004210664;429.198546916969;500.242983521152;1367.6589304985;584.293102248068	17	0.3003671	0.1770833
20140904-PurClathDigest-1ug-02	6555	3803	0	AEIENYILTYK	11	0	Unmodified	_AEIENYILTYK_					0	0	0	E1BKN2	2	HCD	FTMS	MULTI-MSMS	2	0	678.85592	1355.6973	1.7274	-3.2717898	47.894	0.00096958	111.63	104.93	NaN	NaN	1	0	0	0	-1	0	0	0	0	y1;y2;y3;y4;y5;y6;y7;y8;y9;y3-H2O;y4-H2O;y7-NH3;y8-H2O;y8-NH3;y9-H2O;a2;b2;b3;b4;b6	50193.2;66526.1;87192.4;89779.3;36520.7;31738.7;54661.2;72811;31165.3;7780.3;14347.6;5103.7;15447;8158;2023.2;148205.6;194631.4;20063.7;3923;6698.4	0.0008022438;0.001470511;0.002366971;0.003252068;0.003896042;0.004351432;0.00344289;0.005868951;0.00445769;0.002665802;0.001686789;0.0008213426;0.002468494;0.01458257;0.0009618721;0.0009266895;0.0009769718;0.001620051;0.004127984;-0.00170986	5.453286;4.740914;5.755953;6.202631;6.112513;5.436225;3.764801;5.624106;3.854065;6.779578;3.331628;0.9151747;2.407047;14.20611;0.844775;5.353766;4.858478;5.156616;9.313844;-2.373745	147.112001926786;310.17466219755;411.221444211499;524.304623095643;637.388043101236;800.450916250676;914.49475223881;1043.5349192741;1156.62039451562;393.210580694826;506.295623688455;897.470824685216;1025.5277550456;1026.49965655875;1138.61332564749;173.091142038976;201.086006378793;314.169427279832;443.209512443129;720.321606272561	20	0.4675088	0.1587302
20140904-PurClathDigest-1ug-03	6290	3675	0	AEIENYILTYK	11	0	Unmodified	_AEIENYILTYK_					0	0	0	E1BKN2	2	HCD	FTMS	MULTI-MSMS	3	0	678.85592	1355.6973	1.1881	-2.6816875	47.892	0.0070332	91.961	79.903	NaN	NaN	1	0	0	0	-1	0	0	0	0	y1;y2;y3;y4;y5;y6;y7;y8;y9;y3-H2O;y4-H2O;y7-NH3;y8-H2O;y8-NH3;a2;b2;b3;b6	97949;135151.9;199657.9;200291.8;89083.7;58629.2;117238.7;163104.2;54255;12675.6;30840.3;9870.2;32102.1;13490.7;315331.2;407765.3;34474.5;6748	0.0009301302;0.00154104;0.002814299;0.003476018;0.004457779;0.007356712;0.004989226;0.006669437;0.006507243;9.750969E-05;0.00293399;0.002192358;0.005537007;0.00998708;0.001016648;0.0009828617;0.001574175;0.0007361795	6.322605;4.968298;6.843763;6.629771;6.993829;9.190744;5.455728;6.391201;5.626093;0.2479818;5.795027;2.442822;5.399195;9.729215;5.873487;4.887768;5.010592;1.022019	147.111874040404;310.174591668986;411.220996883917;524.304399145646;637.387481365103;800.447910970163;914.493205902852;1043.53411878856;1156.61834496309;393.213148987005;506.294376487567;897.469453669565;1025.52468653175;1026.50425204385;173.091052080493;201.086000488863;314.169473156073;720.319160233183	18	0.523539	0.1565217
20140904-PurClathDigest-1ug-01	5662	2896	0	AEITDAEGLGLK	12	0	Unmodified	_AEITDAEGLGLK_					0	0	0	F1MIC9	2	HCD	FTMS	MULTI-MSMS	7	0	608.82462	1215.6347	0.91002	-3.6485465	42.34	0.0045322	98.105	53.787	NaN	NaN	1	0	0	0	-1	0	0	0	0	y1;y2;y3;y4;y5;y6;y7;y8;y9;y10;y6-H2O;y7-H2O;y8-H2O;y9-H2O;y10-H2O;y9(2+);a2;b2;b3;b4;b4-H2O;b5;b5-H2O	54718.7;20380.9;129488.1;39641.8;120580.6;71404.7;148076.5;190751.7;354054.6;111710.4;12063;6432.6;9067.2;26848;11468.7;3594.3;266232.5;395653.3;18231.7;9393.2;3909.3;3309;4159.4	0.000799906;0.001005447;0.001836185;0.002983222;0.00245694;0.00493123;0.004165255;0.004734258;0.005500932;0.005988359;-9.202439E-05;0.004083706;-0.0008440756;0.003039534;0.008267639;-0.0004761004;0.0008938983;0.0009279486;0.001289909;0.002687428;0.002224848;-0.001002896;0.004609555	5.437395;3.864194;5.788429;6.932899;5.041725;8.000547;6.059439;5.899933;6.088653;5.890829;-0.1537954;6.100648;-1.076049;3.4327;8.279699;-1.052753;5.16432;4.614684;4.105769;6.472361;5.601246;-1.891377;8.998986	147.11200426455;260.195862703607;317.216495689327;430.299412632732;487.321402638136;616.361521444992;687.399401208003;802.425775236416;903.472687036721;1016.55626359013;598.355980012893;669.388918070287;784.420788883864;885.464583748087;998.543419623176;452.243208318013;173.091174830213;201.086055401974;314.169757422505;415.216038377269;397.205936270335;530.246671733334;512.230494595567	23	0.7253284	0.2395833
20140904-PurClathDigest-1ug-01	3004	570	0	AEMMELNDR	9	0	2 Oxidation (M)	_AEM(ox)M(ox)ELNDR_		AEM(1)M(1)ELNDR		AEM(120.33)M(120.33)ELNDR	0	0	2	Q28115	2	HCD	FTMS	MULTI-MSMS	5	0	570.73663	1139.4587	0.68715	-5.3196697	32.066	0.0028115	120.33	87.142	120.33	1	1	0	0	0	-1	0	0	0	0	y1;y2;y3;y4;y5;y6;y7;y1-NH3;y2-NH3;y3-NH3;y4-NH3;y5-H2O;y5-NH3;y6-H2O;y6-NH3;y7-H2O;y6(2+);y7(2+);a2;b2;b2-H2O;b3;b3-H2O;b4;b5	1032592;324662.8;1157661;1821001;1879619;999611.9;189754;65023.7;100599.5;242278.6;109612.5;372972.3;117419;104757.1;35325.1;11779.9;207548.5;202897.6;1144000;917523.4;14204.5;409424.9;104572.3;45228.8;34013.7	0.001000495;0.001735187;0.002088562;0.003101988;0.003493877;0.003817182;0.004433312;0.0007851798;0.0009054046;0.0001736427;0.001251546;0.002807741;-0.004392852;0.003558187;-0.001414367;-0.01445273;0.003933839;0.003111996;0.0009575215;0.0009931521;0.002508325;0.002026806;0.002089422;0.003186915;0.008533636	5.713263;5.980429;5.16732;5.996847;5.405867;4.81149;4.714375;4.966612;3.315062;0.4485012;2.501865;4.468775;-6.980611;4.589215;-1.821873;-15.66878;9.904545;6.611511;5.531893;4.938942;13.70116;5.822141;6.329478;6.436201;13.6715	175.117951686092;290.144160026504;404.186734097779;517.269784653055;646.311985860072;793.347061783604;940.381844880835;158.091617899704;273.118440706871;387.162099916025;500.245085993335;628.302107309814;629.293323487526;775.336756091655;776.325744230526;922.390166234808;397.175143876721;470.693665333531;173.09111120702;201.085990198448;183.073910339196;348.120355773272;330.10972847041;495.154594…	25	0.4431313	0.170068
20140904-PurClathDigest-1ug-02	2732	458	0	AEMMELNDR	9	0	2 Oxidation (M)	_AEM(ox)M(ox)ELNDR_		AEM(1)M(1)ELNDR		AEM(104.48)M(104.48)ELNDR	0	0	2	Q28115	2	HCD	FTMS	MULTI-MSMS	3	0	570.73663	1139.4587	0.58571	-5.3196697	32.153	0.0050716	104.48	65.917	104.48	1	1	0	0	0	-1	0	0	0	0	y1;y2;y3;y4;y5;y6;y7;y1-NH3;y2-NH3;y3-NH3;y4-NH3;y5-H2O;y6-H2O;y7-H2O;y6(2+);y7(2+);a2;b2;b2-H2O;b3;b3-H2O;b4;b5	672750.2;206889.3;783679.1;1215983;1289182;676145.1;98815.1;43861.1;71590.2;174274.4;66741.1;330976.8;43143.3;4700;109277.6;112897.9;777637.1;577322.2;16948.2;284462.8;81603.3;26254.9;23737.6	0.001063662;0.001749343;0.002276064;0.003229591;0.003924848;0.003563211;0.005719016;0.001147806;0.00154439;-0.0002126248;0.003212203;0.006339445;0.004520992;0.009807128;0.003423448;0.003193539;0.001025632;0.001080527;0.0006424401;0.002061209;0.002387078;0.001258397;0.005653507	6.073975;6.029222;5.631222;6.243535;6.072687;4.491363;6.081598;7.2604;5.654665;-0.5491874;6.421283;10.08986;5.831011;10.63258;8.61948;6.784752;5.925392;5.37346;3.509149;5.920966;7.231171;2.541412;9.057281	175.117888519356;290.144145869679;404.186546596023;517.269657049234;646.311554889255;793.347315754221;940.380559177277;158.091255273701;273.117801722028;387.162486183471;500.243125336515;628.298575605313;775.335793287022;922.365906378221;397.175654268031;470.693583790634;173.091043096262;201.085902823509;183.075776224219;348.120321370157;330.109430814877;495.15652341054;624.194721396882	23	0.4356602	0.1455696
20140904-PurClathDigest-1ug-03	2590	438	0	AEMMELNDR	9	0	2 Oxidation (M)	_AEM(ox)M(ox)ELNDR_		AEM(1)M(1)ELNDR		AEM(99.86)M(99.86)ELNDR	0	0	2	Q28115	2	HCD	FTMS	MULTI-MSMS	7	0	570.73663	1139.4587	0.46255	-6.0217575	32.234	0.0070116	99.855	69.243	99.855	1	1	0	0	0	-1	0	0	0	0	y1;y2;y3;y4;y5;y6;y7;y1-NH3;y2-NH3;y3-NH3;y4-NH3;y5-H2O;y6-H2O;y6-NH3;y6(2+);y7(2+);a2;b2;b2-H2O;b3;b3-H2O;b4;b5	483211.3;149379.4;581487.4;943985.8;988931.4;542060.3;76300.1;31557.7;43510;123353;55550.3;268996.6;37564.5;29484;86749.2;95692.8;548533.1;419428.6;9200.9;207408.3;50955.8;36247.3;17761.2	0.0008079257;0.001306153;0.0015831;0.002492291;0.002681729;0.002529315;0.003932938;0.0007364422;0.001013467;-0.0007030829;0.001817596;0.00509057;0.0018039;-0.004281113;0.002786542;0.002407192;0.0007221014;0.0007395805;0.001135862;0.001537311;0.001891181;-0.005776718;0.001577479	4.613603;4.501732;3.916749;4.818159;4.149274;3.188152;4.182275;4.658324;3.710726;-1.815987;3.633414;8.102135;2.326596;-5.514563;7.015881;5.11413;4.171793;3.677927;6.204345;4.416026;5.728943;-11.66628;2.527206	175.118144255371;290.144589059706;404.187239560276;517.270394349729;646.312798008197;793.348349649762;940.382345255232;158.091666637294;273.118332644251;387.162976641607;500.244519943583;628.299824480225;775.338510378923;776.328610976588;397.176291174365;470.694370137618;173.091346627111;201.086243770118;183.075282802136;348.120845268406;330.109926711715;495.163558525601;624.198797424696	23	0.422294	0.1292135
20140904-PurClathDigest-1ug-01	3212	752	0	AEMMELNDR	9	0	2 Oxidation (M),Deamidation (NQ)	_AEM(ox)M(ox)ELN(de)DR_	AEMMELN(1)DR	AEM(1)M(1)ELNDR	AEMMELN(58.7)DR	AEM(58.7)M(58.7)ELNDR	0	1	2	Q28115	2	HCD	FTMS	MULTI-SECPEP	5	-1	571.22864	1140.4427	-0.3858	-739.42962	32.864	0.055483	58.699	57.104	58.699	1	1	0	0	0	-1	0	0	0	0	y1;y2;y3;y4;y5;y6;y7;y1-NH3;y5-H2O;a2;b2;b3;b3-H2O	59569.4;61462.2;19743.9;31507.2;39164.5;20577.2;4507.2;7193.7;6738.9;43087.1;24799.7;10960.2;3659.5	0.001074575;0.001611586;0.003102542;0.003148751;0.005944408;0.008224024;-0.001163799;0.001838295;0.004066546;0.0009195021;0.001019924;0.0007548867;0.001572099	6.136293;5.554428;7.657389;6.075693;9.18348;10.35345;-1.23628;11.62811;6.462171;5.312242;5.072079;2.168457;4.762344	175.117877606323;290.144283627435;405.16973570272;518.25375347486;647.293550914058;794.326670525861;941.371457577164;158.090564784334;629.284864088821;173.091149226417;201.085963426683;348.121627692264;330.110245794	13	0.249295	0.1262136
20140904-PurClathDigest-1ug-01	5363	2634	0	AEPAEAQSEEEEIEAQGEYDK	21	0	Unmodified	_AEPAEAQSEEEEIEAQGEYDK_					0	0	0	F1MEW3	2	HCD	FTMS	MULTI-MSMS	4	1	1176.5035	2350.9925	0.6979	-5.2859025	41.211	3.6689E-14	164.94	164.91	NaN	NaN	1	0	0	0	-1	0	0	0	0	y1;y2;y3;y4;y5;y6;y7;y8;y9;y10;y11;y12;y13;y14;y15;y16;y17;y2-H2O;y3-H2O;y6-H2O;y6-NH3;y8-NH3;y10-H2O;y12-H2O;y12-NH3;y14-H2O;y15-H2O;y16-NH3;y19(2+);a2;b2;b2-H2O;b3;b3-H2O;b4;b5;b5-H2O;b6;b7	32868.1;37987.5;76905.5;13816.9;179508.8;93731.5;154367.6;165734.2;84787.5;54125.2;39493.1;75431.4;39290.9;170655;37923.4;78182.7;32514.2;6452.4;5346.4;11840.7;36834.5;5024.7;6107.9;6625.9;6685.8;12666.7;49367.9;8213.6;9772.5;28532.5;80064.2;17952.8;301773.6;10174.8;151421.3;21965;23102.6;19775.9;7778.3	0.001272019;0.002345771;0.002696654;0.005686815;0.00272192;0.003588088;0.006541564;0.008103245;0.00671958;0.00596665;0.004132061;0.01339441;0.006507885;0.01335236;0.02413848;0.01752738;0.02362888;0.00109231;0.00327383;0.003397035;-0.0001629955;0.0008998694;0.009344238;0.00831242;0.003681167;-0.01231284;0.01758693;0.01547175;0.009527426;0.0007547725;0.001037421;0.0004049201;0.002049922;0.003895051…	8.646627;8.948632;6.342078;10.26056;4.452934;4.853213;8.072453;8.626004;6.384503;5.049952;3.152872;9.304232;4.148708;8.064585;13.53262;9.449897;11.91088;4.474331;8.040071;4.709524;-0.225662;0.9755972;8.031061;5.847235;2.587657;-7.518405;9.960192;8.418873;8.85075;4.360545;5.159093;2.21176;6.875757;13.90468;8.27112;9.518258;11.35205;13.21643;11.54493	147.111532151911;262.137401431313;425.200379086889;554.239982022206;611.264410640783;739.322121984052;810.35628229613;939.39731371089;1052.48276135676;1181.52610738273;1310.57053506797;1439.60386581715;1568.65334543589;1655.67852937195;1783.72632075862;1854.77004564629;1983.80653724427;244.128090206417;407.18923722424;721.311748350893;722.299323966118;922.377967985236;1163.51216510873;1421.598383…	39	0.6748657	0.3333333
20140904-PurClathDigest-1ug-02	4915	2368	0	AEPAEAQSEEEEIEAQGEYDK	21	0	Unmodified	_AEPAEAQSEEEEIEAQGEYDK_					0	0	0	F1MEW3	2	HCD	FTMS	MULTI-MSMS	2	1	1176.5035	2350.9925	0.89047	-5.370973	41.399	5.7831E-13	140.63	140.42	NaN	NaN	1	0	0	0	-1	0	0	0	0	y1;y2;y3;y4;y5;y6;y7;y8;y9;y10;y11;y12;y13;y14;y16;y17;y2-H2O;y6-H2O;y6-NH3;y8-H2O;y13-H2O;y14-H2O;y14-NH3;y19(2+);a2;b2;b2-H2O;b3;b3-H2O;b4;b4-H2O;b5;b5-H2O;b6;b13	47087.9;58719;126321.9;26167.1;268735.3;98030.7;219683.4;180507;80051.3;75551.2;58466.9;78512.6;60979;234633.8;134356;21043.8;11308.6;15210.1;53227.3;25500.5;10459.5;15974.4;7965.7;13551.3;47084.9;103340.3;24148.5;420958.2;8836.5;241911.1;9285.4;34808.2;34203;37430.4;11103.6	0.0006833073;0.0006568431;0.001692072;0.001169576;0.002983342;0.004271318;0.004962708;0.00775782;0.01270688;0.0124793;0.008091066;0.00954676;0.002438868;0.0111163;0.02297015;0.02558178;-0.0007352871;0.005018301;0.007665164;0.008235545;0.02254278;0.01252214;0.02350536;0.01351965;0.001316149;0.001219126;4.85993E-05;0.001648964;0.001409332;0.001813639;0.004947272;0.000870409;0.004606141;0.002778426;…	4.644806;2.505705;3.97946;2.110217;4.88061;5.777349;6.124094;8.258291;12.07331;10.56208;6.173716;6.631501;1.554748;6.714035;12.3844;12.89531;-3.011868;6.957203;10.61229;8.938208;14.53785;7.646323;14.34442;12.55947;7.603808;6.062717;0.2654592;5.530872;5.031033;4.912681;14.08832;1.747042;9.592044;4.880821;19.20509	147.112120863307;262.139090359447;425.201383668892;554.244499260944;611.264149218765;739.321438754433;810.357861151871;939.397659136403;1052.47677406026;1181.51959472873;1310.56657606246;1439.60771346482;1568.65741445349;1655.68076543247;1854.76460288423;1983.80458434543;244.12991780337;721.310127085161;722.291495806319;921.38661672504;1550.62674585201;1637.66879490057;1638.64182726911;1076.45014…	35	0.6391533	0.28
20140904-PurClathDigest-1ug-03	4665	2253	0	AEPAEAQSEEEEIEAQGEYDK	21	0	Unmodified	_AEPAEAQSEEEEIEAQGEYDK_					0	0	0	F1MEW3	2	HCD	FTMS	MULTI-MSMS	2	1	1176.5035	2350.9925	0.03498	-5.8813957	41.329	7.0152E-09	124.2	123.82	NaN	NaN	1	0	0	0	-1	0	0	0	0	y1;y2;y3;y4;y5;y6;y7;y8;y9;y10;y11;y12;y14;y15;y16;y4-H2O;y6-H2O;y6-NH3;y8-H2O;y10-H2O;y14-H2O;y14-NH3;y15-NH3;y19(2+);a2;b2;b2-H2O;b3;b3-H2O;b4;b5;b5-H2O;b6	27633.3;51125.5;77600.9;23348;205193;74886.3;176826.9;173752.8;64576;45362.1;75758.5;51660;204004.6;25886.5;57313.7;8560.5;17351;50040.6;23776;7036.9;10542.1;11728.1;70208.8;14207.7;46845.4;82222;11217.1;318337.7;6153.5;182282.1;32210.8;34162;22572.4	0.001267696;0.001220687;0.003118325;0.0008724328;0.003108064;0.005959025;0.004254397;0.004305833;0.01135908;0.008621109;0.01012033;0.01788244;0.01374401;0.007036431;0.002536544;0.005344244;0.003225948;0.003306957;0.01588607;-0.0218345;-0.0008993752;0.02556594;0.01023627;0.008089192;0.001370386;0.0008043196;0.0003150755;0.001731431;0.004427367;0.002427391;0.004066375;0.002681261;0.002514638	8.617241;4.65665;7.333784;1.574093;5.084651;8.060146;5.250018;4.583594;10.7927;7.296604;7.722116;12.42182;8.301136;3.944755;1.367568;9.966331;4.472334;4.578397;17.24162;-18.76553;-0.5491757;15.60193;5.793961;7.514655;7.917155;3.999875;1.721008;5.807481;15.80498;6.575186;8.161881;5.583562;4.417427	147.111536474979;262.138526515234;425.199957416343;554.24479640425;611.264024496242;739.319751047066;810.358569463049;939.401111123122;1052.47812185209;1181.52345292412;1310.56454679715;1439.59937778668;1655.67813772243;1783.74342281179;1854.78503648601;536.229759907007;721.311919437958;722.295854013201;921.378966200297;1163.54334385007;1637.68221642014;1638.63976669325;1766.71367387091;1076.4555…	33	0.6391817	0.3055556
20140904-PurClathDigest-1ug-03	4750	2328	0	AEPAEAQSEEEEIEAQGEYDK	21	0	Unmodified	_AEPAEAQSEEEEIEAQGEYDK_					0	0	0	F1MEW3	2	HCD	FTMS	MULTI-MSMS	7	1	1176.5035	2350.9925	0.03498	-5.7112548	41.676	0.011114	56.428	53.545	NaN	NaN	1	0	0	0	-1	0	0	0	0	y2;y3;y5;y6;y7;y8;y9;y11;y12;y14;y15;y16;y6-H2O;y6-NH3;y8-H2O;y14-H2O;y15-NH3;y10(2+);y19(2+);a2;b2;b3;b4;b5;b5-H2O	6803;10394;14601.1;8157.3;13993.5;13664;6822.5;6181.9;7570.8;15301.5;3868.2;7484.2;3984.3;5514.4;1470.8;2698.7;5908.4;4051.1;1524.2;3763.7;9084.6;31995.3;14681.6;2411.8;2563.5	0.00238522;0.004350307;0.003061348;0.002734791;-0.001039612;0.007095802;0.01024656;0.01884033;0.007292222;0.01209768;0.00230365;0.01506629;0.007449216;0.007884474;0.007633025;0.02210466;0.02181461;-0.002192093;0.01254032;0.0007392294;0.001109068;0.001923519;0.002103755;-0.0007427175;0.001989087	9.099121;10.23123;5.008225;3.699048;-1.282895;7.553561;9.735641;14.37583;5.065415;7.306775;1.291466;8.122988;10.32738;10.91592;8.284275;13.49772;12.34764;-3.70742;11.64969;4.270748;5.515395;6.451779;5.698534;-1.490741;4.142147	262.137361982953;425.198725433406;611.264071212857;739.322975281179;810.363863471517;939.398321153843;1052.47923437593;1310.55582680226;1439.60996800266;1655.67978405118;1783.74815559246;1854.77250673585;721.307696169893;722.291276497248;921.387219244592;1637.65921238052;1766.70209553639;591.271867342875;1076.45111979327;173.091329499141;201.085874282655;298.137823683229;369.174757235431;498.2201…	25	0.06055925	0.2083333
20140904-PurClathDigest-1ug-02	6909	4113	0	AEPAEAQSEEEEIEAQGEYDKLLFR	25	1	Unmodified	_AEPAEAQSEEEEIEAQGEYDKLLFR_					0	0	0	F1MEW3	3	HCD	FTMS	MULTI-MSMS	4	1	961.11732	2880.3301	-0.49309	-4.8107294	49.329	0.020976	63.979	63.823	NaN	NaN	1	0	0	0	-1	0	0	0	0	y1;y2;y3;y4;y5;y6;y7;y9;y10;y11;y12;y13;y18;y10-NH3;y9(2+);y12(2+);a2;b2;b3;b4	4583.4;6364.2;8294.2;4949.9;20079.7;3403.2;11161.7;44450.2;24390.9;37089.9;14020.3;4714;14292.8;3522.3;3870.6;3601.6;24899;16552;45001.2;19886.6	0.001546802;0.002008711;0.003675906;-0.001572288;0.006782023;-0.008771162;-0.004789876;0.0100309;0.006722192;0.01106625;0.02433716;0.004762659;0.01988217;0.005793737;0.009397766;0.002898558;0.00129025;0.0008864749;0.001997613;0.001204894	8.832942;6.234643;8.445162;-2.86727;10.026;-11.08189;-5.017965;8.79445;5.298669;8.260307;16.57033;3.010868;9.099351;4.62895;16.4643;3.944302;7.454184;4.408434;6.700303;3.263741	175.117405379162;322.18535738635;435.267754171033;548.357066345697;676.443675053132;791.486171270175;954.54551852214;1140.59475456302;1268.65664078548;1339.68941051806;1468.71873270209;1581.82237118289;2185.00965246832;1251.63102013855;570.796633200603;734.872274605582;173.090778477994;201.086096875746;298.13774958949;369.175656096428	20	0.5381236	0.3030303
20140904-PurClathDigest-1ug-02	6925	4127	0	AEPAEAQSEEEEIEAQGEYDKLLFR	25	1	Unmodified	_AEPAEAQSEEEEIEAQGEYDKLLFR_					0	0	0	F1MEW3	2	HCD	FTMS	MULTI-MSMS	4	1	1441.1723	2880.3301	0.19307	0.45827313	49.402	9.1957E-05	107.75	107.6	NaN	NaN	1	0	0	0	-1	0	0	0	0	y1;y2;y3;y4;y5;y6;y7;y8;y9;y10;y11;y12;y13;y14;y15;y12-NH3;y13-NH3;y14-H2O;y23(2+);b2;b3;b4;b4-H2O;b5;b5-H2O;b6;b6-H2O;b7;b8;b9	12827;8304.1;11980.4;10512.8;59776.9;7589.2;15397.9;1621.8;37125.1;14161.7;47644.4;51032.8;18932;27844.8;22430.5;1949.1;2692;3472.6;11770.4;11574.3;52278.4;33548.6;2000.8;11007.2;6173;9795.7;1730.4;4080.8;2247.8;2171.2	0.0006016172;0.00330859;0.003868072;0.001719766;0.004943556;0.005614561;0.01352414;0.0006961601;0.009335492;0.006817787;0.008322293;0.009462718;0.01698309;-0.001291997;0.005846406;-0.02043019;-0.02493495;0.018019;0.01987693;0.001264;0.001986166;0.002743689;0.0001253876;0.004244853;0.004672481;0.008353372;-0.006233998;0.002235296;0.009839528;0.002427212	3.435489;10.26925;8.886653;3.136234;7.308136;7.093824;14.16842;0.6424615;8.184752;5.374021;6.212093;6.442773;10.73649;-0.7551693;3.177556;-14.07293;-15.93465;10.64424;14.82122;6.285874;6.661909;7.431966;0.3570607;8.520119;9.730196;14.67439;-11.30879;3.205585;12.54502;2.657374	175.11835056381;322.184057506844;435.267562005657;548.353774292097;676.445513519506;791.471785546169;954.527204504999;1083.58262558207;1140.59544997401;1268.65654519013;1339.69215447247;1468.73360714312;1581.81015075338;1710.8710189351;1839.90647362766;1451.73695095109;1564.82551968499;1692.84114324722;1341.11260964095;201.085719351042;298.137761036129;369.174117300964;351.166170916474;498.215209…	30	0.6311575	0.2857143
20140904-PurClathDigest-1ug-03	6693	4028	0	AEPAEAQSEEEEIEAQGEYDKLLFR	25	1	Unmodified	_AEPAEAQSEEEEIEAQGEYDKLLFR_					0	0	0	F1MEW3	3	HCD	FTMS	MULTI-MSMS	6	1	961.11732	2880.3301	-0.63607	-5.9564314	49.578	0.02538	56.131	55.624	NaN	NaN	1	0	0	0	-1	0	0	0	0	y1;y2;y3;y4;y5;y6;y8;y9;y10;y11;y12;y13;y14;y20;y10-NH3;a2;b2;b3;b4	16633.2;9830;11402.2;11317.4;35899.5;2615.3;5874.7;88154.1;42135.3;65236.3;80238.9;14769.9;4525.4;16935.8;14551.9;34028.7;26050.3;64064.3;36554.3	0.001152727;0.002270582;0.001788749;0.0005917703;0.00411189;-0.01010322;-0.0004433134;0.009266185;0.005635015;0.01244767;0.01106884;-0.004388849;-0.0211567;0.04242481;-0.001342103;0.0008244952;0.000993915;0.001506329;0.001196389	6.582581;7.047447;4.10952;1.079174;6.078664;-12.76485;-0.4091178;8.123988;4.441714;9.291467;7.536323;-2.774536;-12.3659;17.79502;-1.072277;4.763356;4.942736;5.05245;3.240703	175.117799453981;322.185095514912;435.269641328274;548.354902287734;676.446345185288;791.48750332498;1083.58376505561;1140.59551928145;1268.65772796248;1339.68802909839;1468.73200102243;1581.83152269022;1710.89088364222;2384.08280112123;1251.63815597859;173.091244233299;201.085989435564;298.138240873966;369.175664601942	19	0.5294332	0.1727273
20140904-PurClathDigest-1ug-03	6713	4045	0	AEPAEAQSEEEEIEAQGEYDKLLFR	25	1	Unmodified	_AEPAEAQSEEEEIEAQGEYDKLLFR_					0	0	0	F1MEW3	2	HCD	FTMS	MULTI-MSMS	2	1	1441.1723	2880.3301	-1.1239	-6.9019943	49.671	0.0001141	111.11	110.85	NaN	NaN	1	0	0	0	-1	0	0	0	0	y1;y2;y3;y4;y5;y6;y7;y9;y10;y11;y12;y13;y14;y15;y16;y12-NH3;y23(2+);a2;b2;b3;b4;b4-H2O;b5;b5-H2O;b6;b7	8726.1;5923.6;5582.5;6240.8;40096.2;3398.8;10018.1;23984.3;17883;31248.2;44359.4;12482.9;9661.8;17191.7;15704.7;3598.5;9112.3;3745;7381.3;36326.2;20612.5;2055.4;5557.5;5274.2;4485.3;2378.5	0.00139191;0.002497373;0.004602448;0.005806969;0.005394094;-0.005556793;0.004390683;0.01491891;0.0145444;0.008055916;0.009282012;-0.007024292;0.007350356;0.008065991;0.03639553;-0.007626571;0.001023799;0.0009889283;0.001502835;0.00180349;0.002408714;0.004862494;0.002888013;0.006417653;0.0005317659;0.006518759	7.948435;7.751366;10.57385;10.5899;7.974178;-7.020737;4.599807;13.07999;11.46448;6.013258;6.319737;-4.4406;4.296287;4.383919;18.48504;-5.253458;0.7633848;5.71334;7.473611;6.049178;6.524596;13.84689;5.796703;13.36447;0.9341418;9.348456	175.1175602705;322.184868724233;435.266827629519;548.349687089486;676.445062982226;791.482956901168;954.536337963496;1140.5898665602;1268.64881857854;1339.69242084909;1468.73378785009;1581.83415813381;1710.86237658185;1839.90425404267;1968.91851759795;1451.72414733112;1341.13146276959;173.091079800283;201.08548051603;298.137943713086;369.174452276139;351.161433809764;498.216566073184;480.20247174…	26	0.6093721	0.2857143
20140904-PurClathDigest-1ug-01	5694	2924	0	AEPELDLAVK	10	0	Unmodified	_AEPELDLAVK_					0	0	0	F1MEW3	2	HCD	FTMS	MULTI-MSMS	7	0	542.79787	1083.5812	-0.55074	-4.7464521	42.459	0.053983	66.056	45.719	NaN	NaN	1	0	0	0	-1	0	0	0	0	y1;y2;y3;y4;y5;y6;y7;y8;y7-H2O;y8(2+);a2;b2	126560.5;63066.9;44691.4;67343.1;49460.2;177441.5;164991.2;166140;11623.3;230460.4;275063.7;97805	0.0008318823;0.001390626;0.00171657;0.00257491;0.002946256;0.003015079;0.002433909;0.005943792;0.002714914;0.002322926;0.0009756843;0.0008543155	5.654756;5.648821;5.411351;5.983991;5.40274;4.579331;3.090861;6.719925;3.528416;5.246519;5.636826;4.248506	147.111972288324;246.179827460934;317.216615304227;430.299820944862;545.326392630621;658.410387788217;787.453562054446;884.502816022982;769.442716363601;442.755695214978;173.091093044156;201.08612903507	12	0.5492367	0.2142857
20140904-PurClathDigest-1ug-03	5021	2565	0	AEPELDLAVK	10	0	Unmodified	_AEPELDLAVK_					0	0	0	F1MEW3	2	HCD	FTMS	MULTI-MSMS	6	0	542.79787	1083.5812	-0.7872	-4.9310252	42.808	0.022104	76.228	47.272	NaN	NaN	1	0	0	0	-1	0	0	0	0	y1;y2;y3;y4;y5;y6;y7;y8;y7-H2O;y8-H2O;y8(2+);a2;b2	113760.4;52040.4;44164.4;61377.1;52939.9;156192.9;182266.8;150086.3;16612;2445.5;219402.7;257575.6;96826.5	0.000959623;0.001747045;0.001882733;0.002905651;0.003615475;0.003924826;0.003504632;0.005593387;0.003008315;-0.006500872;0.003291342;0.001074553;0.001027544	6.523085;7.096632;5.935168;6.752624;6.629937;5.961071;4.450595;6.323761;3.909734;-7.502409;7.433782;6.208022;5.109975	147.111844547566;246.179471041887;317.2164491418;430.299490204518;545.325723411684;658.409478041908;787.452491331316;884.503166428885;769.442422962071;866.504696001664;442.75472679914;173.090994175853;201.085955806456	13	0.5325922	0.1494253
20140904-PurClathDigest-1ug-01	5805	3021	0	AESLQQEAEVLR	12	0	Unmodified	_AESLQQEAEVLR_					0	0	0	F1MIC9	2	HCD	FTMS	MULTI-MSMS	6	0	686.85698	1371.6994	-0.6671	-6.0952286	42.875	2.5626E-06	151.98	134.31	NaN	NaN	1	0	0	0	-1	0	0	0	0	y1;y2;y3;y4;y5;y6;y7;y8;y9;y10;y1-NH3;y2-NH3;y6-H2O;y7-H2O;y7-NH3;y8-H2O;y8-NH3;y10-H2O;a2;b2;b3;b3-H2O;b4;b4-H2O;b8(2+)	105167.4;45207.9;80126.4;68696;180071.8;222608.6;340996.2;353949.7;57907.2;139974.5;8478.4;23696.5;22141.2;33982.2;81256.1;40500.1;137099.8;24776.7;137683.3;236964.8;184244.4;165070.7;9114;51638.2;6300.9	0.001127226;0.001730906;0.002027883;0.005951183;0.004484994;0.005186487;0.004783014;0.00482006;-0.00033167;0.006617389;0.001349961;0.002610885;0.003389507;-0.000577641;0.006833284;0.003137606;0.005262935;0.01289352;0.001244344;0.0008951065;0.001489121;0.001597673;0.0005242145;0.001588556;0.005463629	6.436958;6.005892;5.236362;11.52642;7.636026;7.239768;5.664075;4.956329;-0.305519;5.643249;8.539136;9.628084;4.853387;-0.6989489;8.258554;3.287182;5.508163;11.16705;7.188966;4.451359;5.16845;5.914967;1.306608;4.145599;12.72985	175.117824954786;288.201285255536;387.269402194562;516.30807199055;587.346651967342;716.388543570924;844.447524555379;972.506065020646;1085.59528073097;1172.62036008241;158.091053118422;271.173856175347;698.379775864197;826.442320523838;827.418925183703;954.497182787996;955.479073044712;1154.60351926517;173.090824384508;201.086088244146;288.117522639523;270.106849401259;401.202551526425;383.19092…	25	0.7505226	0.3246753
20140904-PurClathDigest-1ug-03	5133	2663	0	AESLQQEAEVLR	12	0	Unmodified	_AESLQQEAEVLR_					0	0	0	F1MIC9	2	HCD	FTMS	MULTI-MSMS	6	0	686.85698	1371.6994	0.98061	-5.5120105	43.262	5.8977E-09	198.32	164.32	NaN	NaN	1	0	0	0	-1	0	0	0	0	y1;y2;y3;y4;y5;y6;y7;y8;y9;y10;y1-NH3;y2-NH3;y3-NH3;y4-H2O;y6-H2O;y7-H2O;y7-NH3;y8-H2O;y8-NH3;y10-H2O;y10-NH3;a2;b2;b2-H2O;b3;b3-H2O;b4;b4-H2O;b5;b5-H2O;b5-NH3;b6;b6-NH3;b7;b11	72056.8;45700.9;59588.9;43808.7;135280.3;174342.9;310742.4;269197.9;60647.9;128178.8;5131.9;11132.3;9070.3;4964.7;18510.4;28079.4;58957.9;103476.5;127060.4;4052.1;21254.4;107219.2;172324.8;3077.4;136507.7;138865.3;13126.7;35252.2;5672.4;5720.5;1824.7;3269.6;1710.5;1979.5;4928.5	0.001082144;0.001354584;0.002389723;0.003361714;0.002925097;0.004826241;0.005616134;0.005946915;0.001744592;0.008840072;0.001370458;0.001158967;0.007326507;0.00366084;0.004880214;0.002605637;0.005299719;0.007276138;0.005562703;0.0001501407;0.01105045;0.001049687;0.001072355;0.001310499;0.001683589;0.001732996;0.002370613;0.00217067;0.004539256;0.003238756;-0.003618362;0.004972889;-0.002887294;0.0…	6.179518;4.700127;6.170706;6.511029;4.980175;6.736901;6.650667;6.115049;1.60704;7.538747;8.66879;4.273866;19.78867;7.346661;6.987924;3.152848;6.405109;7.623039;5.821901;0.1300352;9.562605;6.064362;5.33282;7.158259;5.843414;6.415969;5.908797;5.66473;8.576656;6.335001;-7.06382;7.565455;-4.509307;5.816442;2.657315	175.11787003687;288.201661576876;387.269040354214;516.310661460188;587.348211865072;716.388903816415;844.446691435461;972.504938165586;1085.59320446913;1172.61813739905;158.09103262156;271.175308093001;370.237554469207;498.299797647821;698.378285157506;826.439137245713;827.420458749342;954.493044256552;955.47877327638;1154.61626264387;1155.58937792479;173.091019041977;201.085910995637;183.0751081…	35	0.7738088	0.2777778
20140904-PurClathDigest-1ug-01	3282	813	0	AESPVKEEVPAKPVK	15	2	Unmodified	_AESPVKEEVPAKPVK_					0	0	0	F1MDZ2;O77788	3	HCD	FTMS	MULTI-MSMS	3	0	536.63828	1606.893	0.069321	-4.824041	33.144	0.0069544	92.38	91.691	NaN	NaN	1	0	0	0	-1	0	0	0	0	y1;y2;y3;y4;y5;y6;y7;y8;y9;y10;y11;y12;y13;y9-H2O;y11(2+);a2;b2;b3;b5;b7;b7-H2O;b8;b8-H2O;b9	121803.9;21486.6;410792.4;63440.1;79335.2;650981.1;34733.7;41662.8;96494.7;112755.2;5277.6;75372;76099.4;19694.1;5710.1;289867.3;265278.4;35530.7;13087.4;37895.7;19877.3;184543.9;22816.7;16793.8	0.0008849455;0.001557074;0.002293539;0.003378331;0.00412682;0.004132708;0.002782073;0.003333368;0.005689031;0.01068609;0.01995077;0.009201488;0.01153051;0.008033349;-0.004694639;0.001087742;0.001104435;0.002186262;0.004173036;0.005570649;0.001984093;0.004680072;0.005141511;0.00647291	6.015458;6.324952;6.682189;7.167724;7.608978;6.463267;3.767274;3.842381;5.708631;9.501644;16.30343;6.966711;8.190393;8.20941;-7.666265;6.284221;5.492356;7.588108;8.617773;7.513971;2.742864;5.376825;6.031773;6.676666	147.111919225115;246.179661012269;343.231688399791;471.325566624964;542.361931924271;639.41468988841;738.484454439177;867.526496240953;996.566733673617;1124.65669963538;1223.71584887146;1320.77936200306;1407.80906139061;978.55382466977;612.376232691445;173.090980986479;201.085878915305;288.116825498848;484.236016492356;741.372174993618;723.365196863721;870.415658666328;852.404632541253;969.482279…	24	0.54513	0.1875
20140904-PurClathDigest-1ug-02	3004	696	0	AESPVKEEVPAKPVK	15	2	Unmodified	_AESPVKEEVPAKPVK_					0	0	0	F1MDZ2;O77788	3	HCD	FTMS	MULTI-MSMS	3	0	536.63828	1606.893	0.22103	-6.3176066	33.332	0.0019695	110.97	110.28	NaN	NaN	1	0	0	0	-1	0	0	0	0	y1;y2;y3;y4;y5;y6;y7;y8;y9;y10;y11;y12;y13;y8-H2O;y9-H2O;y14(2+);a2;b2;b3;b5;b7;b7-H2O;b8;b8-H2O;b9	61388;11789.2;192343.6;34374.9;41035.2;326399.9;18881.2;15017.9;44790.9;67916;14703.2;32270.6;31484.8;2116;7455.1;2719.5;152898.7;129985.6;20561.6;5536.5;14332.4;11928.7;83398.8;10807;8127.3	0.001026599;0.002087592;0.002560901;0.003192734;0.006840607;0.004293566;0.004019523;0.001853307;0.006542257;0.003906818;-0.007412555;0.007196473;0.006921628;-0.003137731;0.00284419;0.01519057;0.001153836;0.001182972;0.001321304;0.004708018;0.005563894;0.005298918;0.00600727;0.003020736;0.004724017	6.97836;8.47997;7.461149;6.773943;12.61269;6.714839;5.442945;2.136307;6.564802;3.473766;-6.05728;5.448648;4.91658;-3.693524;2.906509;19.75571;6.666069;5.882922;4.585986;9.72258;7.504859;7.325404;6.901622;3.543773;4.872713	147.111777571677;246.179130495224;343.231421038047;471.325752222568;542.359218137202;639.414529030881;738.483216989266;867.527976302201;996.565880447301;1124.66347890484;1223.74321219391;1320.78136701771;1407.8136702723;849.522402653701;978.559013828282;768.920040167031;173.090914892606;201.085800378473;288.117690456875;484.235481510699;741.372181748951;723.36188203854;870.414331468227;852.406753…	25	0.559988	0.1879699
20140904-PurClathDigest-1ug-02	3015	706	0	AESPVKEEVPAKPVK	15	2	Unmodified	_AESPVKEEVPAKPVK_					0	0	0	F1MDZ2;O77788	4	HCD	FTMS	MULTI-MSMS	6	0	402.73053	1606.893	-0.48928	-6.0540337	33.383	0.056666	55.335	52.639	NaN	NaN	1	0	0	0	-1	0	0	0	0	y1;y2;y3;y4;y5;y6;y7;y8;y9;y10;y12;y9-H2O;y10(2+);y12(2+);y13(2+);a2;b2	24700;6224;67162.1;14238.6;17040.8;130224.9;3360.5;3183.2;4295;2635.6;7394.4;1859.5;6566.1;2400.9;1147.6;56918.1;23976.6	0.0009421231;0.000940744;0.00254493;0.004354937;0.003690233;0.003853932;0.01303773;0.01243443;0.008064397;-0.0003851532;0.007020877;0.01786459;0.003101787;-0.001007972;0.007706515;0.00106623;0.0009990114	6.404127;3.821362;7.414618;9.239782;6.804;6.027279;17.65495;14.33335;8.092198;-0.3424595;5.315699;18.2563;5.511013;-1.525153;10.94044;6.159942;4.968081	147.111862047512;246.18027734285;343.231437008551;471.324590020049;542.362368510883;639.414968664006;738.474198783773;867.5173951755;996.564358308635;1124.66777087579;1320.78154261376;978.543993427825;562.834229307711;660.898927950883;704.406227669256;173.091002498081;201.085984339126	17	0.410041	0.1504425
20140904-PurClathDigest-1ug-03	2852	667	0	AESPVKEEVPAKPVK	15	2	Unmodified	_AESPVKEEVPAKPVK_					0	0	0	F1MDZ2;O77788	3	HCD	FTMS	MULTI-MSMS	5	0	536.63828	1606.893	0.27629	-6.5043022	33.417	0.00045892	120.7	120.02	NaN	NaN	1	0	0	0	-1	0	0	0	0	y1;y2;y3;y4;y5;y6;y7;y8;y9;y10;y11;y12;y13;y9-H2O;y9-NH3;a2;b2;b3;b5;b7;b7-H2O;b8;b8-H2O;b8-NH3;b9;b9-H2O	39183.9;8015.8;152698.7;22685.7;26862.8;251746.6;10650;13427.7;36056.6;48927.3;7973.6;27771.6;24685.2;6715.6;1929.4;116287.3;100064.5;15264.8;4166.7;13725.7;8732;67743.2;4186.8;1584.9;5445.2;1459.8	0.0008184364;0.002045242;0.002401775;0.00240176;0.002563268;0.003732709;0.004656014;-0.002307551;0.006252561;0.007571845;0.01391999;0.004995561;0.008554512;0.005265587;0.004266025;0.001005644;0.001021671;0.001609438;0.007616987;0.005513758;0.009029211;0.004218228;-0.00175572;0.01190765;-0.002717564;0.005629566	5.563356;8.30794;6.997536;5.095746;4.726107;5.837694;6.30484;-2.659903;6.274106;6.732565;11.37513;3.782271;6.076459;5.380973;4.355124;5.809911;5.08077;5.586049;15.73002;7.437233;12.48235;4.84622;-2.059709;13.95349;-2.803082;5.916688	147.111985734213;246.179172844931;343.23158016342;471.326543196289;542.363495476299;639.415089886742;738.482580498206;867.53213715997;996.566170143499;1124.6598138775;1223.72187964488;1320.78356792977;1407.81203738931;978.556592432136;979.541607577843;173.091063084797;201.085961679123;288.117402322528;484.23257254164;741.37223188425;723.358151745462;870.416120511133;852.411529772133;853.381881985…	26	0.570317	0.1884058
20140904-PurClathDigest-1ug-01	8595	5462	0	AFLQGGQEASDIALLLR	17	0	Unmodified	_AFLQGGQEASDIALLLR_					0	0	0	F1MIC9	2	HCD	FTMS	MULTI-MSMS	4	1	901.49398	1800.9734	0.377	-0.86111061	53.509	2.6701E-11	177.58	163.59	NaN	NaN	1	0	0	0	-1	0	0	0	0	y1;y2;y3;y4;y5;y6;y7;y8;y9;y10;y11;y12;y13;y14;y15;y1-NH3;y2-NH3;y3-NH3;y8-NH3;y10-H2O;y10-NH3;y11-H2O;y11-NH3;y13-NH3;y14-H2O;y14-NH3;a2;b2;b3;b4;b14;b15;b16	113630.3;64079.2;88648;45236;79811;266058.3;92818;293766.6;325554.9;270021.3;89669.3;243125.7;772057.8;154128.5;42336.3;16131;12067.8;7478.1;6599.5;16118.7;19611.2;6467.8;25437.2;60524.2;100929.5;139952.8;277308.4;392966.2;104093.5;12791.3;11436.2;18665.5;18874.6	0.001106997;0.001183736;0.002401384;0.002622016;0.004118214;0.003082846;0.003687078;0.003850128;0.005809594;0.007402329;0.004095907;0.007619258;0.007755815;0.008056677;-0.001434656;0.0006428959;0.002972707;0.001798429;-0.001158113;-0.003064278;-0.006262682;0.009724952;0.01777855;0.003064601;0.009936215;0.01087592;0.0008615717;0.001110602;0.002140342;0.004534005;-0.008346187;-0.003603382;0.01371182	6.32144;4.107315;5.98424;5.097543;7.034822;4.413591;4.532277;4.27532;5.979517;6.725577;3.333569;5.92614;5.776176;5.477815;-0.9057875;4.0666;10.96238;4.680255;-1.310786;-2.830419;-5.779458;8.032707;14.67306;2.31168;6.839494;7.481265;4.508084;5.068656;6.443033;9.85116;-5.954293;-2.378802;8.423244	175.117845184009;288.201832425726;401.284678758116;514.368522106364;585.404139696304;698.489239044646;813.515577844297;900.547443204134;971.582597525819;1100.6235978873;1228.68548182058;1285.70342219319;1342.7247493602;1470.78302600915;1583.87658132234;158.091760183556;271.173494352611;384.258732611198;883.525902343818;1082.62349980771;1083.61071379732;1210.66928808939;1211.64525007973;1325.70289…	33	0.8015248	0.275
20140904-PurClathDigest-1ug-02	7973	5044	0	AFLQGGQEASDIALLLR	17	0	Unmodified	_AFLQGGQEASDIALLLR_					0	0	0	F1MIC9	2	HCD	FTMS	MULTI-MSMS	4	1	901.49398	1800.9734	-0.19535	5.0245954	53.804	1.5536E-08	153.72	139.74	NaN	NaN	1	0	0	0	-1	0	0	0	0	y1;y2;y3;y4;y5;y6;y7;y8;y9;y10;y11;y12;y13;y14;y15;y1-NH3;y2-NH3;y10-H2O;y11-NH3;y12-NH3;y13-H2O;y14-H2O;y14-NH3;a2;b2;b3;b4;b5;b6;b6-NH3;b14;b15;b16	55592.8;31039.9;38389.4;26658;44045.6;112681.9;38050.4;130514;146005.3;118947.6;43422.2;109576.6;369352.3;73110.2;14911.8;5410.8;5215.2;19245.2;13553.7;3141.5;21555.4;36427.6;66339.5;112114.5;169050.6;47303.2;4784.4;2582.8;2552.7;1584.3;3639;16091.6;4626.4	0.0009879534;0.001320969;0.002703861;0.002245049;0.002147442;0.004088342;0.004914311;0.003572616;0.004823321;0.008848759;0.00595291;0.007082717;0.008507722;0.01135946;0.0168087;-0.0002866975;0.0002724432;0.0008830352;-0.001618544;-0.009638661;0.01091288;0.008379553;0.009612855;0.001102088;0.001301079;0.001913929;0.001632475;0.005287217;0.005719741;0.006847136;0.02072202;0.01045637;0.02305748	5.641645;4.583487;6.738016;4.364667;3.668295;5.85313;6.040842;3.967159;4.964392;8.03978;4.844949;5.508824;6.336166;7.723424;10.6125;-1.813477;1.004672;0.8156468;-1.335802;-7.597309;8.237929;5.767974;6.612432;5.766569;5.937976;5.761465;3.546902;10.22136;9.959628;12.28704;14.7837;6.902924;14.16441	175.117964227581;288.201695192697;401.284376281117;514.368899073012;585.406110467472;698.488233548027;813.514350611115;900.547720716374;971.583583798638;1100.6221514572;1228.68362481794;1285.70395873398;1342.7239974532;1470.77972323074;1583.85833796405;158.092689777037;271.176194616659;1082.6195524948;1211.66464716995;1268.69413101022;1324.71102761259;1452.77213844714;1453.75492073052;191.1167874…	33	0.8069658	0.275
20140904-PurClathDigest-1ug-03	7720	4926	0	AFLQGGQEASDIALLLR	17	0	Unmodified	_AFLQGGQEASDIALLLR_					0	0	0	F1MIC9	2	HCD	FTMS	MULTI-MSMS	1	0	901.49398	1800.9734	0.86015	2.6925232	53.978	5.4375E-17	215.23	196.29	NaN	NaN	1	0	0	0	-1	0	0	0	0	y1;y2;y3;y4;y5;y6;y7;y8;y9;y10;y11;y12;y13;y14;y15;y1-NH3;y2-NH3;y3-NH3;y7-NH3;y9-H2O;y10-H2O;y11-NH3;y12-H2O;y12-NH3;y13-H2O;y13-NH3;y14-H2O;y14-NH3;a2;b2;b3;b4;b5;b6;b8;b14;b15;b16	32540;16215.8;24699.3;15297.2;28983.1;72259.7;24103.1;88255.4;91840.4;84285.1;28168.4;69755.8;237638.8;47711.1;10424.7;2922.9;3361.5;4033.5;1437.1;1836.2;12479.9;17825.7;2019.9;3327.8;5763.5;12367.9;25628.4;43672.5;66417.2;104963.6;28750.1;2457.8;2797.6;1708.2;1075.4;3825.6;7576.5;2458.6	0.0009088828;0.001154049;0.002188012;0.002674685;0.003358115;0.003943883;0.003767831;0.004540438;0.004592418;0.006595097;0.009132639;0.008373724;0.007062869;0.004690972;0.007049274;0.0006927489;0.0005530868;0.00281071;0.005816683;0.006595702;0.0009789212;0.0004695322;0.002173132;0.01048684;0.009740213;0.005878109;0.004856129;0.007962731;0.0008836606;0.001014304;0.00178559;0.001332363;0.002079382;…	5.190115;4.004306;5.452516;5.199939;5.736397;5.646311;4.631542;5.041868;4.726734;5.992142;7.432883;6.512956;5.260099;3.189431;4.45067;4.381943;2.039587;7.314647;7.302923;6.916843;0.9042154;0.3875107;1.714234;8.265984;7.352701;4.433966;3.342656;5.477348;4.623663;4.62916;5.375126;2.894841;4.019878;0.08501752;2.980188;11.33895;5.797943;8.743955	175.118043298238;288.201862112759;401.284892129456;514.368469437421;585.404899795118;698.48837800759;813.515497091264;900.546752894682;971.583814701909;1100.62440511865;1228.68044508878;1285.70266772736;1342.72544230632;1470.78639171403;1583.86809739321;158.091710330587;271.175913973092;384.257720330679;796.486899138077;953.571246731518;1082.61945660884;1211.66255909397;1267.69830363303;1268.6740…	38	0.8143696	0.2835821
20140904-PurClathDigest-1ug-01	9170	5965	0	AFMTADLPNELIELLEK	17	0	Oxidation (M),Deamidation (NQ)	_AFM(ox)TADLPN(de)ELIELLEK_	AFMTADLPN(1)ELIELLEK	AFM(1)TADLPNELIELLEK	AFMTADLPN(86)ELIELLEK	AFM(86)TADLPNELIELLEK	0	1	1	P49951;F1MPU0	2	HCD	FTMS	MULTI-MSMS	3	0	982.50027	1962.986	-0.788	0.12789801	55.815	0.002658	86.005	83.226	86.005	1	1	0	0	0	-1	0	0	0	0	y1;y2;y3;y4;y5;y6;y7;y8;y9;y10;y11;y12;y13;y14;y2-H2O;y10-H2O;a2;b2;b3;b4;b4-H2O;b6;b6-H2O	3680.8;6982.9;8144.1;9569.7;18133.8;7019.3;4758.3;19047;11179.8;81243.2;4301.5;6916.7;4257.8;4860.1;7161.8;9525.8;12462.7;15487.5;17242.3;5009.3;8450.7;7681.5;7120.7	0.001423531;0.002480129;0.002908407;0.004793624;0.003026863;0.001976911;0.008606327;-0.002408661;0.007454551;0.007480377;0.01762765;-0.006139965;-0.01602566;-0.01241447;0.002411351;0.01116453;0.000901215;0.001664355;0.001191554;0.004377091;0.002900533;0.002757872;0.006113933	9.676555;8.981;7.47208;9.542994;4.794171;2.655538;10.03623;-2.441427;6.767044;6.240674;13.43855;-4.303391;-10.69932;-7.764551;9.341165;9.456383;4.715515;7.595939;3.254304;9.368943;6.457361;4.221725;9.624555	147.111380639223;276.152917137477;389.236552840619;502.318731602979;631.363091461057;744.448205393472;857.52563995806;986.579248041829;1101.5963278621;1198.64906588727;1311.72298259186;1426.77369324218;1497.8206927269;1598.86476000637;258.142421229545;1180.63481704403;191.116988333522;219.111139815651;366.147011845142;467.191504782221;449.182416653669;653.257180820527;635.243260073114	23	0.4273699	0.23
20140904-PurClathDigest-1ug-02	8484	5491	0	AFMTADLPNELIELLEK	17	0	Oxidation (M),Deamidation (NQ)	_AFM(ox)TADLPN(de)ELIELLEK_	AFMTADLPN(1)ELIELLEK	AFM(1)TADLPNELIELLEK	AFMTADLPN(72.58)ELIELLEK	AFM(72.58)TADLPNELIELLEK	0	1	1	P49951;F1MPU0	2	HCD	FTMS	MULTI-MSMS	3	1	982.50027	1962.986	-0.041468	-1.9098139	56.197	0.0089406	72.583	70.382	72.583	1	1	0	0	0	-1	0	0	0	0	y1;y2;y3;y4;y5;y6;y7;y8;y9;y10;y11;y12;y2-H2O;y10-H2O;a2;b2;b3;b4;b4-H2O;b6;b6-H2O	2094.2;3229.9;4104.4;5866.5;13704.3;1736.3;4844.3;2988.1;3282.7;72640.3;5498.5;3238.3;5701.6;1801.3;7359.2;8593.6;9646.4;5216.5;7064.7;3447.1;3344.9	0.002054769;0.002245928;0.001577469;0.004828698;0.005147383;0.004520379;0.01087545;0.004896668;0.008689173;0.009044761;-0.009258744;0.003374776;0.001512856;-0.02236778;0.0005772745;0.001445369;0.002160994;0.001096487;0.001713392;0.00211171;0.007329137	13.9675;8.132907;4.052713;9.612818;8.152837;6.072141;12.6824;4.963316;7.88781;7.545805;-7.058315;2.365335;5.860529;-18.94502;3.020524;6.596504;5.901999;2.346959;3.814459;3.232582;11.53755	147.110749401219;276.153151338942;389.237883777781;502.318696529808;631.360970940525;744.445661925064;857.523370831999;986.571942712759;1101.59509324051;1198.6475015038;1311.74986898965;1426.76417850161;258.143319723988;1180.66834936076;191.117312274014;219.111358801652;366.146042405262;467.194785385988;449.183603794235;653.2578269831;635.242044869974	21	0.4020097	0.2142857
20140904-PurClathDigest-1ug-03	8197	5344	0	AFMTADLPNELIELLEK	17	0	Oxidation (M),Deamidation (NQ)	_AFM(ox)TADLPN(de)ELIELLEK_	AFMTADLPN(1)ELIELLEK	AFM(1)TADLPNELIELLEK	AFMTADLPN(72.43)ELIELLEK	AFM(72.43)TADLPNELIELLEK	0	1	1	P49951;F1MPU0	2	HCD	FTMS	MULTI-MSMS	6	1	982.50027	1962.986	-0.25453	-3.5399835	56.176	0.0082597	72.433	71.025	72.433	1	1	0	0	0	-1	0	0	0	0	y1;y2;y3;y4;y5;y6;y7;y8;y9;y10;y12;y2-H2O;a2;b2;b3;b4;b4-H2O;b6;b6-H2O	2002.6;3344.7;3857.4;4254.4;8416.9;2646.5;3383.8;6107;3558.2;51596.4;1840.8;2510.9;3794.2;5509.7;9975.1;1649.9;3635.7;2203.8;1964.3	0.001196079;0.002119596;0.003391627;0.005224566;0.004437193;8.286747E-05;-0.0007591119;0.001342762;0.01192341;0.005688024;-0.02501124;0.00128753;0.001187925;0.002106781;0.004054988;0.005326237;0.002579173;0.005659374;0.00266767	8.130418;7.675434;8.713549;10.40091;7.027973;0.1113137;-0.8852255;1.361033;10.8238;4.745355;-17.5297;4.987651;6.215706;9.615144;11.07484;11.40057;5.741924;8.663356;4.199423	147.111608091708;276.153277670537;389.23606961975;502.318300661525;631.361681130779;744.450099436725;857.535005396479;986.575496618824;1101.59185900785;1198.65085824087;1426.79256452002;258.143545050567;191.116701623308;219.110697389652;366.14414841051;467.190555636287;449.182738013664;653.254279318237;635.246706336782	19	0.3947015	0.2134831
20140904-PurClathDigest-1ug-01	9724	6450	0	AFMTADLPNELIELLEK	17	0	Oxidation (M)	_AFM(ox)TADLPNELIELLEK_		AFM(1)TADLPNELIELLEK		AFM(40.49)TADLPNELIELLEK	0	0	1	P49951;F1MPU0	3	HCD	FTMS	MULTI-MSMS	5	1	655.00794	1962.002	0.15189	-3.1140742	59.076	0.02991	40.493	38.758	40.493	1	1	0	0	0	-1	0	0	0	0	y1;y2;y3;y4;y5;y6;y7;y2-H2O;a2;b3;b6;b6-H2O;b7;b7-H2O	429;1773.3;2117.9;1644.2;2965.5;4328.1;1312.8;1521.8;1573.8;429;1415.8;603.3;762.9;1240.7	0.001407797;0.001932793;0.0031621;0.002340216;0.005315543;0.00740223;0.003362185;0.002072369;0.001355047;0.001430067;0.006937745;-0.009333272;0.008075898;0.001996867	9.569597;6.998983;8.123856;4.658803;8.419184;9.943316;3.920774;8.027994;7.090158;3.905721;10.6203;-14.69208;10.53833;2.668426	147.111396373703;276.153464473408;389.236299147728;502.321185011831;631.360802781242;744.44278007463;857.530884099621;258.142760212028;191.116534502;366.146773331707;653.253000948014;635.258707279428;766.335926775281;748.331441120312	14	0.3501041	0.2372881
20140904-PurClathDigest-1ug-01	10011	6701	0	AFMTADLPNELIELLEK	17	0	Oxidation (M)	_AFM(ox)TADLPNELIELLEK_		AFM(1)TADLPNELIELLEK		AFM(46.25)TADLPNELIELLEK	0	0	1	P49951;F1MPU0	2	HCD	FTMS	MULTI-SECPEP	4	0	982.00827	1962.002	0.26864	-6.3880431	61.167	0.05557	46.249	45.578	46.249	1	1	0	0	0	-1	0	0	0	0	y4;y5;y6;y10;y11;y12;y13;y14;a2;b2;b3;b4;b4-H2O	1145.4;1015.8;572.4;6354.7;1494.4;2267.4;1148.3;559.6;1687.3;1727.6;2463;530.2;1344.3	0.0006969254;0.006600258;0.006254083;0.009784847;0.01557011;0.006832335;0.018133;0.01114813;0.001584523;0.0009429588;0.003422961;0.008387732;0.0008812118	1.387406;10.45404;8.401013;8.169951;11.87886;4.792009;12.11449;6.976926;8.290885;4.30355;9.348656;17.95367;1.961804	502.322828302142;631.359518065788;744.443928220642;1197.66274583362;1310.74102454764;1425.77670535773;1496.80251848253;1597.85718182268;191.116305025245;219.11186121179;366.144780437516;467.187494140984;449.184435974847	13	0.3020972	0.2131148
20140904-PurClathDigest-1ug-03	4593	2190	0	AFSTQMSITAGQK	13	0	Unmodified	_AFSTQMSITAGQK_					0	0	0	F1N757	2	HCD	FTMS	MULTI-MSMS	2	0	685.34265	1368.6708	-2.1137	-8.8430545	41.043	0.038856	50.354	33.581	NaN	NaN	1	0	0	0	-1	0	0	0	0	y1;y3;y4;a2;b2;b9;b9-H2O;b9-NH3;b10;b10-H2O;b10-NH3	113759.3;335831.8;66792.2;185888.9;194323.2;249700.2;65303.2;298397.7;425259.2;12640.2;34816.5	0.0006728945;-0.001991733;-0.00243091;0.001006874;0.001280442;0.01311052;0.01468115;0.01401905;0.01300799;0.0141399;0.01076601	4.574024;-5.995678;-6.028558;5.268368;5.84379;13.55173;15.46312;14.75046;12.52599;13.85629;10.53988	147.112131276154;332.194837138759;403.232390103394;191.116882674426;219.111523728795;967.442233521187;949.430098197963;950.414775883826;1038.47944983925;1020.46775323588;1021.45514271328	11	0.265127	0.08870967
20140904-PurClathDigest-1ug-01	6558	3680	0	AFVHWYVGEGMEEGEFSEAR	20	0	Oxidation (M)	_AFVHWYVGEGM(ox)EEGEFSEAR_		AFVHWYVGEGM(1)EEGEFSEAR		AFVHWYVGEGM(98.57)EEGEFSEAR	0	0	1	Q2HJ86;F2Z4C1;F6RP72;F2Z4K0;Q32KN8;Q3ZCJ7;F1MNF8	3	HCD	FTMS	MULTI-MSMS	7	1	782.67591	2345.0059	0.057742	-1.9300586	45.68	0.0001062	98.573	97.475	98.573	1	1	0	0	0	-1	0	0	0	0	y1;y2;y3;y4;y5;y6;y7;y8;y9;y1-NH3;y2-NH3;y4-H2O;y4-NH3;y5-NH3;y7-H2O;y7-NH3;y8-H2O;y9-H2O;a2;b2;b4;b5;b6;b7;b8;b9;b10;b11	132720.5;290585.7;41533.8;271992.1;499371.8;133795.4;1168066;489603.8;478528.4;21301.2;40816.6;12307.3;15410;14264.6;40191.2;16290.6;111282.1;158910.8;70937.3;90443.8;305587.1;421225.5;382813;342507.8;138009.9;105903.7;245972.6;29788.3	0.00109832;0.001540396;0.002395731;0.002409168;0.004089017;0.00672625;0.004407123;0.005135556;0.006744318;0.001588194;0.003072932;0.006273224;0.007752121;-0.008459537;0.003125232;-0.0005586583;0.009756609;0.00535006;0.001064983;0.000911512;0.002321313;0.004730938;0.004012576;0.003370371;0.008524713;0.01189046;0.01119256;-0.003943389	6.271891;6.257842;6.385275;5.212075;6.711062;9.110025;5.541051;5.555552;6.402175;10.04608;13.41151;14.12208;17.41281;-14.28298;4.020369;-0.7177588;10.7643;5.166981;5.572419;4.16003;5.099123;7.376936;4.988417;3.730565;8.875618;10.91365;9.762156;-3.04844	175.117853860936;246.154525572785;375.1962633337;462.228278306511;609.295012373938;738.334968237093;795.358751087742;924.400615751256;1053.44160008539;158.090814885903;229.126443935028;444.213849564167;445.196386251928;592.281011826789;777.349468292893;778.337167767755;906.385430012329;1035.43242965713;191.116824565404;219.1118926586;455.237808635734;641.314711964691;804.378758864866;903.44781498…	28	0.6779143	0.2276423
20140904-PurClathDigest-1ug-02	6133	3434	0	AFVHWYVGEGMEEGEFSEAR	20	0	Oxidation (M)	_AFVHWYVGEGM(ox)EEGEFSEAR_		AFVHWYVGEGM(1)EEGEFSEAR		AFVHWYVGEGM(106.93)EEGEFSEAR	0	0	1	Q2HJ86;F2Z4C1;F6RP72;F2Z4K0;Q32KN8;Q3ZCJ7;F1MNF8	3	HCD	FTMS	MULTI-MSMS	4	1	782.67591	2345.0059	-0.41938	-2.3138529	46.231	3.9693E-06	106.93	104.95	106.93	1	1	0	0	0	-1	0	0	0	0	y1;y2;y3;y4;y5;y6;y7;y8;y9;y11;y1-NH3;y2-NH3;y4-H2O;y4-NH3;y5-NH3;y6-H2O;y7-H2O;y7-NH3;y8-H2O;y9-H2O;a2;b2;b4;b5;b6;b7;b8;b9;b10;b10-H2O	99064;196379.8;61563.8;195547;364759.7;109734.9;856639.5;395266.9;302080.5;10735.2;22516.2;44231.2;10393;9813.3;7697.6;15047.1;25443.7;10556.4;77363.8;124953;52962;66963.9;249086;286816.8;302995.7;226250.6;122804.5;43344.5;205309.4;7402	0.001198998;0.001643482;0.002920569;0.003171183;0.004440856;0.004210531;0.004562029;0.005372591;0.008110059;0.01841372;0.001236145;0.001917952;0.004462605;0.005006618;-0.001241696;-0.005244633;-0.005851768;-0.006351113;0.007709017;0.006123344;0.001141352;0.001420064;0.002726257;0.004597894;0.003951951;0.003852536;0.005520619;0.002563104;0.007014016;-0.0084253	6.846813;6.676628;7.78412;6.860655;7.288519;5.702718;5.735814;5.811974;7.698642;14.64327;7.819192;8.370673;10.04603;11.2458;-2.09649;-7.280811;-7.527761;-8.159787;8.505211;5.913808;5.972016;6.481013;5.988649;7.169481;4.913047;4.264262;5.747848;2.352523;6.117605;-7.4657	175.117753182588;246.154422487208;375.195738496404;462.227516291385;609.294660535379;738.337483956556;795.358596181551;924.400378716258;1053.4402343437;1257.48679364014;158.091166934231;229.127598914984;444.215660183391;445.199131754838;592.273793985461;720.336374433609;777.35844529286;778.342960222293;906.387477604009;1035.43165637255;191.116748196322;219.111384106983;455.23740369207;641.3148450…	30	0.6756164	0.2097902
20140904-PurClathDigest-1ug-03	5856	3295	0	AFVHWYVGEGMEEGEFSEAR	20	0	Oxidation (M)	_AFVHWYVGEGM(ox)EEGEFSEAR_		AFVHWYVGEGM(1)EEGEFSEAR		AFVHWYVGEGM(106.93)EEGEFSEAR	0	0	1	Q2HJ86;F2Z4C1;F6RP72;F2Z4K0;Q32KN8;Q3ZCJ7;F1MNF8	3	HCD	FTMS	MULTI-MSMS	1	1	782.67591	2345.0059	0.23657	-3.465236	46.15	5.8898E-06	106.93	105.83	106.93	1	1	0	0	0	-1	0	0	0	0	y1;y2;y3;y4;y5;y6;y7;y8;y9;y11;y1-NH3;y2-NH3;y4-NH3;y6-H2O;y7-H2O;y8-H2O;y9-H2O;a2;b2;b4;b5;b6;b7;b8;b9;b10	122800.8;183937.3;32976.8;138769.4;307653.9;91808.9;703407.1;278109.6;284770.8;15963.8;17399.7;25037.4;12463.5;18111.8;19841.8;78670.8;71321.9;30509.3;40197.6;192602.2;224078.9;226972.6;236547.8;88756.1;71575.8;143645.8	0.0007071616;0.00154811;0.002381181;0.002625521;0.003137117;0.004416829;0.004591737;0.007378194;0.004863144;0.02401081;0.0008622299;0.00278726;0.000396021;0.006826189;0.01243008;0.00556822;0.0007321911;0.0013844;0.001495148;0.002421573;0.002716679;0.002987022;0.003916246;0.009234446;0.004001438;0.003718748	4.038195;6.28918;6.346495;5.680142;5.148758;5.982129;5.773167;7.981617;4.616426;19.09437;5.453991;12.16471;0.8895275;9.476549;15.99053;6.143297;0.7071324;7.243749;6.823691;5.31936;4.236096;3.713448;4.334781;9.614573;3.672691;3.243472	175.118245019427;246.154517858808;375.196277883994;462.228061953924;609.295964273606;738.337277658626;795.358566473444;924.398373113519;1053.44348125908;1257.48119655063;158.091540849613;229.126729607111;445.203742352422;720.32430361212;777.340163447421;906.389618400596;1035.43704752593;191.116505148451;219.111309022787;455.237708375921;641.316726223539;804.379784418827;903.4472691108;960.4634146…	26	0.6821539	0.25
20140904-PurClathDigest-1ug-03	3778	1477	0	AGATLEIK	8	0	Unmodified	_AGATLEIK_					0	0	0	F1N1S2	2	HCD	FTMS	MSMS	3	0	401.73709	801.45962	NaN	-4.2066592	37.508	0.045557	57.59	12.196	NaN	NaN	1	0	0	0	-1	0	0	0	0	y1;y2;y3;y4;y5;y6;y7;y3-H2O;y6-H2O;y7-H2O;b3	74827.2;134006.9;47508.7;80838.9;112340.8;54810.6;115137.7;67603.1;9952.7;28482.9;23106.4	0.000888678;0.001548191;0.00239078;0.0026809;0.003591684;0.004251476;0.004686486;0.002333611;0.002857114;0.004736993;0.0009609361	6.04083;5.950111;6.14222;5.337026;5.952729;6.304049;6.407336;6.286217;4.352737;6.63989;4.802231	147.111915492563;260.195319959947;389.237070467439;502.32084432803;603.36761201753;674.404066013727;731.425094726808;371.226562950133;656.394895688803;713.414479533388;200.102006829709	11	0.4001727	0.1145833
20140904-PurClathDigest-1ug-01	2852	437	0	AGDSHASEEPEQTEPEQR	18	0	Unmodified	_AGDSHASEEPEQTEPEQR_					0	0	0	G3MYP5	2	HCD	FTMS	MULTI-MSMS	5	0	998.92758	1995.8406	-0.058689	-6.7932995	31.469	1.6345E-17	180.64	177.11	NaN	NaN	1	0	0	0	-1	0	0	0	0	y1;y2;y4;y5;y6;y7;y8;y9;y10;y11;y12;y13;y2-NH3;y4-NH3;y9-H2O;y11-H2O;y12-H2O;y13-H2O;y14(2+);y15(2+);b5;b5-H2O;b6;b6-H2O;b7;b7-H2O;b8;b8-H2O;b9;b9-H2O;b11;b12;b14	21288.3;54077;150485.8;21425.2;18819.3;28968.8;11290.7;295629.8;83589.7;56728.8;213296;177004.2;8188.9;21505.4;16033.7;10224.9;21825.3;9738.5;28400.2;7781;112546.2;35925.8;110643.3;17589.6;43522.6;14016.2;42353.1;30562.8;79126.8;23494.9;7848.9;5794.2;18342.3	0.001390396;0.002489297;0.003433479;0.005298739;0.003847273;0.007150235;0.01743038;0.008597248;0.01212474;0.009389001;0.009624298;0.01195615;0.002207202;0.001714293;0.02024214;0.024866;0.02052292;0.02304511;0.006284805;0.006514005;0.002682329;0.002527265;0.002816151;0.004925095;0.004624031;0.003986748;0.006396905;0.00474791;0.006390655;0.008013928;0.009326567;0.01369461;0.02165912	7.939787;8.210758;6.487204;8.049001;5.066473;8.057378;17.14834;7.720864;9.757967;6.845326;6.5982;7.816216;7.713478;3.346631;18.47777;18.37072;14.24606;15.24513;7.53698;7.424397;5.729256;5.614015;5.222658;9.449433;7.383703;6.554582;8.46948;6.439764;7.226536;9.250546;8.399103;11.05761;14.74854	175.117561784839;303.17504039555;529.26945316157;658.310180997423;759.359310937745;887.414585487545;1016.44689843728;1113.50849542231;1242.54756102871;1371.59288986166;1458.6246829752;1529.65946491283;286.148773388849;512.244623245559;1095.48628584063;1353.56684817645;1440.60321966388;1511.63781126063;833.86251988992;877.378304894269;468.181054953435;450.170645331051;539.218034918987;521.20536128…	33	0.7233995	0.3666667
20140904-PurClathDigest-1ug-01	2853	438	0	AGDSHASEEPEQTEPEQR	18	0	Unmodified	_AGDSHASEEPEQTEPEQR_					0	0	0	G3MYP5	3	HCD	FTMS	MULTI-MSMS	6	0	666.28748	1995.8406	0.021656	-6.731404	31.472	2.7635E-05	97.904	95.021	NaN	NaN	1	0	0	0	-1	0	0	0	0	y1;y2;y3;y4;y5;y6;y7;y8;y4-NH3;y5-H2O;y7-H2O;y7-NH3;y8-H2O;b5;b6;b7;b8;b8-H2O;b9;b9-H2O;b11;b11(2+)	30941.1;49302.6;9337.2;246325.2;57206.7;158173;70296.5;22293.8;27906.8;6225.6;8932.3;35572;16465.4;33512.7;59461.7;20648.7;76194.8;20258.5;219357.7;13478.3;43705.3;9972	0.001273786;0.002222401;0.001182288;0.004094081;0.005323681;0.006003516;0.003300415;-0.004444592;-0.002184822;0.005693351;0.002737168;0.008446977;0.01903695;0.002155718;0.005244287;0.001723299;0.00521036;0.006338516;0.006246914;0.01246282;0.005800066;0.001925732	7.273888;7.330416;2.735392;7.735353;8.086889;7.90605;3.719119;-4.372581;-4.26516;8.891704;3.148311;9.704855;19.0668;4.604449;9.72577;2.75177;6.898487;8.597178;7.063993;14.38601;5.223272;3.465302	175.117678394647;303.175307291199;432.218940500559;529.268792559523;658.31015605561;759.35715469498;887.418435307527;1016.46877341049;512.248522360969;640.29922169946;869.408433868299;870.386739643265;998.434727179206;468.18158156419;539.215606783284;626.251156180763;755.290262216197;737.278569374068;884.331818758281;866.31503816938;1110.42762255445;555.718423811388	22	0.6646377	0.2857143
20140904-PurClathDigest-1ug-02	2567	314	0	AGDSHASEEPEQTEPEQR	18	0	Unmodified	_AGDSHASEEPEQTEPEQR_					0	0	0	G3MYP5	3	HCD	FTMS	MULTI-MSMS	6	1	666.28748	1995.8406	-0.077755	-5.5289032	31.427	2.1001E-06	121.82	118.93	NaN	NaN	1	0	0	0	-1	0	0	0	0	y1;y2;y3;y4;y5;y6;y7;y8;y9;y2-NH3;y4-NH3;y5-H2O;y7-H2O;y7-NH3;y8-H2O;y8-NH3;y9(2+);b5;b5-H2O;b6;b7;b7-H2O;b8;b8-H2O;b9;b9-H2O;b10;b11;b11-H2O;b10(2+)	22043.7;62274.8;6884.3;264931.2;60127.9;149860.1;72927.3;20631.5;3833.4;11375.1;21893.9;9604.1;13255.2;38249.9;8894.2;4875.5;5022.2;32844.9;8616.4;60617.5;27977.5;6251.5;58224.6;29562.6;228173.2;26508.9;6894.7;37496;4377.7;5143.1	0.001441463;0.002076107;-3.005706E-05;0.002725898;0.003946105;0.004861325;0.004744192;0.005654885;0.003188429;6.866965E-05;0.001806152;0.003903114;0.005536918;0.002396303;-0.003510405;-0.0005434055;-0.000785994;0.002418468;-0.001031671;0.002515278;0.004016711;0.002963356;0.005533749;0.007287844;0.006261048;0.005926257;-0.01811756;0.008605114;0.0008332269;0.006835018	8.231402;6.847872;-0.06954109;5.150296;5.994281;6.401886;5.346068;5.563321;2.863394;0.239977;3.525956;6.095748;6.368625;2.753128;-3.515829;-0.5437109;-1.410454;5.165664;-2.291715;4.664674;6.413921;4.872023;7.326655;9.884803;7.079976;6.840713;-18.46077;7.749389;0.7627336;13.91516	175.117510718369;303.175453585466;432.220152845658;529.270160742489;658.311533632375;759.358296885762;887.416991530295;1016.45867393319;1113.51390424166;286.150911921249;512.244531387187;640.301011936827;869.405634117796;870.392790317942;998.457274536872;999.438323122555;557.262970562569;468.181318814826;450.174204266796;539.218335792278;626.248862769236;608.239351438029;755.289938827252;737.2776…	30	0.7291057	0.3125
20140904-PurClathDigest-1ug-02	2572	318	0	AGDSHASEEPEQTEPEQR	18	0	Unmodified	_AGDSHASEEPEQTEPEQR_					0	0	0	G3MYP5	2	HCD	FTMS	MULTI-MSMS	3	1	998.92758	1995.8406	-0.041348	-5.189965	31.45	4.6409E-08	145.69	144.2	NaN	NaN	1	0	0	0	-1	0	0	0	0	y1;y2;y4;y5;y6;y7;y8;y9;y10;y11;y12;y13;y14;y2-NH3;y4-NH3;y9-NH3;y10-H2O;y12-H2O;y13-H2O;b5;b5-H2O;b6;b6-H2O;b7;b7-H2O;b8;b8-H2O;b9;b9-H2O;b11;b14	12061.8;36308.6;100009;8815.3;17192.8;22480.2;3378.9;205860.5;61737.4;42307.4;156800.3;125717.3;12416.3;3230.4;13600.7;4909.4;10134.7;6647.8;6922.2;72693.5;15727.4;81080.1;9760.7;17047.7;6033.9;28078.9;13087.3;57442.3;9044.2;3604.1;15645	0.0008466359;0.0019546;0.004410311;0.00249303;0.001275228;0.003402859;0.00438234;0.007826739;0.006225718;0.01003111;0.0108768;0.01199147;0.01495179;0.002091689;0.004039085;0.00516268;0.02325359;-0.009424671;-0.02069301;0.002213947;0.00471326;0.002713316;0.0002195157;0.002852184;0.007971861;0.002936804;0.004748819;0.005895267;0.01113049;0.01288528;0.009354503	4.834657;6.447091;8.332842;3.786998;1.679341;3.83456;4.311375;7.028894;5.010422;7.313481;7.456896;7.839304;8.970811;7.309793;7.885106;4.708389;18.98987;-6.542034;-13.68874;4.728823;10.46999;5.031946;0.4211654;4.554386;13.10656;3.8883;6.440997;6.666349;12.84807;11.60396;6.369791	175.118105545102;303.175575091914;529.268476329976;658.312986706796;759.361882983266;887.418332863869;1016.45994647873;1113.50926593166;1242.55346004882;1371.59224774909;1458.62343046986;1529.65942959545;1666.7153811353;286.148888901653;512.242298454784;1096.48538088885;1224.52586748923;1440.63316725745;1511.68154938677;468.181523334881;450.16845933621;539.21813775369;521.210066868123;626.2500272…	31	0.7424666	0.3690476
20140904-PurClathDigest-1ug-03	2426	294	0	AGDSHASEEPEQTEPEQR	18	0	Unmodified	_AGDSHASEEPEQTEPEQR_					0	0	0	G3MYP5	3	HCD	FTMS	MULTI-MSMS	3	1	666.28748	1995.8406	-0.17367	-4.7773402	31.468	1.3715E-08	140.49	135.09	NaN	NaN	1	0	0	0	-1	0	0	0	0	y1;y2;y3;y4;y5;y6;y7;y8;y9;y2-NH3;y4-NH3;y5-H2O;y6-H2O;y7-H2O;y7-NH3;y8-H2O;y9-H2O;y9(2+);b5;b5-H2O;b6;b7;b7-H2O;b8;b8-H2O;b9;b9-H2O;b10;b11;b8(2+);b11(2+)	32345.1;66660.4;11767.2;331958.8;72544.9;182310.8;93171.5;18120.4;7881.5;7381.7;18005.8;11969.8;4293.7;37592.8;36399.8;22333;22639.6;3783.4;39617;13779.3;76356.8;37337.8;7001.1;73183.7;42468.6;256698.2;39923.3;21248.5;50207.3;3975.5;7734	0.00105573;0.001987795;0.006523372;0.003798082;0.004183225;0.005685964;0.006046498;0.01264002;0.0160642;0.002821188;0.0003143202;0.0002508736;0.004052364;0.005117452;0.004923999;0.003942874;0.01593279;0.0005244706;0.004052348;0.004493536;0.005108583;0.00538954;0.007171942;0.005737834;0.007859916;0.004976409;0.003313508;0.009075786;0.00641839;-0.00187076;0.008504939	6.028684;6.556581;15.09293;7.176089;6.354479;7.487862;6.813602;12.43543;14.42675;9.859185;0.6136119;0.3918034;5.466206;5.886147;5.657232;3.948996;14.54397;0.9411567;8.655539;9.981894;9.474099;8.606087;11.7914;7.596864;10.66074;5.627302;3.82479;9.247967;5.780109;-4.947096;15.30459	175.117896450657;303.175541897429;432.213599417085;529.26908855871;658.311296511624;759.357472246832;887.415689224411;1016.45168880049;1113.50102847145;286.148159403213;512.246023218868;640.304664176943;741.348541160704;869.406053583888;870.390262621601;998.44982125784;1095.49059519799;557.261660097988;468.179684934666;450.168679059672;539.215742486682;626.2474899394;608.235142851492;755.28973474…	31	0.7497724	0.3522727
20140904-PurClathDigest-1ug-03	2436	303	0	AGDSHASEEPEQTEPEQR	18	0	Unmodified	_AGDSHASEEPEQTEPEQR_					0	0	0	G3MYP5	2	HCD	FTMS	MULTI-MSMS	5	0	998.92758	1995.8406	-0.082326	-4.2880894	31.509	5.9571E-18	212.95	207.56	NaN	NaN	1	0	0	0	-1	0	0	0	0	y1;y2;y4;y5;y6;y7;y8;y9;y10;y11;y12;y13;y14;y2-NH3;y4-NH3;y9-H2O;y9-NH3;y10-H2O;y11-H2O;y12-H2O;y13-H2O;y9(2+);y14(2+);y15(2+);b5;b5-H2O;b6;b6-H2O;b7;b7-H2O;b8;b8-H2O;b9;b9-H2O;b11;b12;b14;b14-H2O	11604.8;23510.6;62683;11649.6;10163.2;13969.2;3408.8;119351.6;35087.9;20965.8;96388.9;71939.6;4193.1;3324.4;11012.5;2599;3218.2;5501.6;4716.7;9580.2;8007.8;1510.7;12244.7;3219.5;46107.7;16120.8;52167.6;5279;11398.8;7323.7;17421;9653.8;37296.4;6923.5;2736.9;1789.3;10023;1709.1	0.001277199;0.002493165;0.003923027;0.00613484;0.007075533;0.005232412;0.002710924;0.008323384;0.007491986;0.01065452;0.01190465;0.01206911;0.0236051;0.0006964564;0.00183424;0.0109591;0.01029692;0.01782763;-0.02098143;0.02486527;0.007983431;0.007863678;0.006133155;0.01044429;0.003371323;0.003956567;0.00362817;0.004028398;0.004304085;0.00574421;0.008233707;0.007171782;0.005540901;0.003444631;0.017…	7.293374;8.223516;7.412161;9.319084;9.317807;5.89623;2.667021;7.474916;6.029514;7.768001;8.161571;7.890065;14.16272;2.433883;3.580789;10.00379;9.390889;14.55874;-15.50032;17.26037;5.28126;14.11147;7.355114;11.90403;7.200907;8.789066;6.728587;7.728989;6.872807;9.444039;10.90143;9.727382;6.265631;3.976146;16.12407;6.90407;1.363248;-7.456051	175.117674982364;303.175036527514;529.26896361391;658.309344896383;759.356082677729;887.416503310426;1016.46161789446;1113.50876928603;1242.55219378085;1371.59162433795;1458.6224026235;1529.65935194898;1666.70672782341;286.150284134504;512.244503299418;1095.49556888182;1096.48024664465;1224.53129344583;1353.61269560406;1440.59887731489;1511.65287294309;557.254320890474;833.862671539435;877.374374…	38	0.7442208	0.4
20140904-PurClathDigest-1ug-01	3770	1240	0	AGDSHASEEPEQTEPEQREPTPYPDER	27	1	Unmodified	_AGDSHASEEPEQTEPEQREPTPYPDER_					0	0	0	G3MYP5	4	HCD	FTMS	MULTI-MSMS	3	1	771.08806	3080.3231	1.3141	-4.2366	35.034	0.050541	24.2	23.79	NaN	NaN	1	0	0	0	-1	0	0	0	0	y1;y2;y6;y13;y14(2+);y15(2+);y16(2+);b5;b6;b7;b8;b9;b11;b10(2+)	17217.8;56874;16228.9;121031.4;14260.2;29424.2;9720;7588.3;20220.9;5398.9;12354.2;71954.1;9875.2;6978.5	0.0006662154;0.001653582;-0.002233051;0.01024419;0.001227789;0.004350956;0.00241126;0.0005875942;0.002112068;0.009086294;0.006863283;0.0053448;0.009014057;-0.003142815	3.804374;5.436555;-2.87631;6.348085;1.408174;4.716882;2.444373;1.255052;3.916904;14.5092;9.086968;6.043879;8.117668;-6.398211	175.11828596555;304.1598916951;776.359577602288;1613.7451812701;871.901419723354;922.42213579308;986.453364245406;468.183149688141;539.218739002208;626.24379318589;755.288609292938;884.332720872778;1110.42440856325;491.20219581083	14	0.2915358	0.245614
20140904-PurClathDigest-1ug-01	3771	1241	0	AGDSHASEEPEQTEPEQREPTPYPDER	27	1	Unmodified	_AGDSHASEEPEQTEPEQREPTPYPDER_					0	0	0	G3MYP5	3	HCD	FTMS	MULTI-MSMS	4	2	1027.7817	3080.3231	0.017845	-3.757278	35.037	0.012449	67.655	67.578	NaN	NaN	1	0	0	0	-1	0	0	0	0	y1;y2;y4;y6;y8;y13;y16;y18;y19;y21;y22;y4-NH3;y11(2+);y20(2+);b3;b4;b5;b5-H2O;b6;b6-H2O;b7;b7-H2O;b8;b8-H2O;b9;b25(2+)	30785.1;204968.6;9444.9;5940.8;20307.4;94220.9;23659.9;223478.3;50667.3;250573.2;215458.7;5674;4789.5;24071.8;7245;4392.3;50671.5;13614.8;86240.7;6730.6;14590.6;7024.9;23791.4;9739;40266.1;15032.5	0.001389821;0.00154513;-0.005476478;-0.009614837;0.003650386;0.01344371;0.02718802;0.01196019;0.01262599;0.02117693;0.01995064;-0.001135999;0.00685008;0.01047767;-0.002534223;-0.004219723;0.003659212;0.004542692;0.002233012;-0.004496776;0.002807392;-0.0004294715;-0.002567404;0.005331553;0.003969519;-2.687042E-05	7.936501;5.07999;-10.60826;-12.3844;3.746083;8.330767;13.78789;5.441425;5.425796;8.327224;7.631834;-2.275567;9.865786;8.528584;-10.3821;-12.74344;7.815821;10.09109;4.1412;-8.62749;4.482862;-0.7060858;-3.399194;7.231386;4.48871;-0.01933692	175.117562360287;304.160000147543;516.246728639699;776.366959389305;974.454136491719;1613.74198175406;1971.87708652382;2197.98767130543;2327.02959860039;2543.09566916691;2614.13400924661;499.215839058541;694.326822410322;1228.53556940613;244.095331232854;331.129045142694;468.180078070545;450.168629904074;539.218618058271;521.214783159343;626.250072087806;608.242744265244;755.298039980381;737.2795…	26	0.653093	0.3023256
20140904-PurClathDigest-1ug-02	3461	1096	0	AGDSHASEEPEQTEPEQREPTPYPDER	27	1	Unmodified	_AGDSHASEEPEQTEPEQREPTPYPDER_					0	0	0	G3MYP5	3	HCD	FTMS	MULTI-MSMS	4	1	1027.7817	3080.3231	0.17929	-8.5295046	35.313	0.047194	46.862	45.608	NaN	NaN	1	0	0	0	-1	0	0	0	0	y1;y2;y4;y6;y8;y11;y13;y18;y21;y1-NH3;y13-NH3;y19(2+);y20(2+);b4;b5;b5-H2O;b6;b7;b8;b8-H2O;b9;b11;b25(2+)	22776.3;70955.7;2964.9;2369.8;7683.9;7402.2;25995.8;90348.5;97322;2906.9;3394.3;9798;10370.9;1736.9;21602;8552.7;36002.2;5786;6094.6;2739.6;14283;2033.2;12600.4	0.001255449;0.002357232;-0.002045725;0.01089604;0.01325064;0.0128953;0.002718636;0.01798338;0.02299476;0.00146191;0.001406312;0.003784793;0.001004868;-0.005758651;0.003462023;0.006584439;0.005975266;0.007037143;0.008465687;0.006684995;0.007371833;0.007913345;0.02173711	7.169173;7.749993;-3.962715;14.03502;13.59815;9.292924;1.684667;8.181767;9.042043;9.24727;0.8807466;3.251482;0.8179331;-17.39088;7.394637;14.62667;11.08142;11.23703;11.20857;9.067126;8.33606;7.126407;15.64305	175.117696731981;304.159188045623;516.243297886239;776.346448512912;974.444536236809;1387.64717321392;1613.75270682534;2197.98164811712;2543.09385133174;158.090941170038;1596.72747004761;1164.02096573417;1228.54504220756;331.130584071104;468.180275258943;450.166588157222;539.214875804685;626.245842336759;755.28700688927;737.278222895044;884.330693839428;1110.4255092758;1389.56997706949	23	0.2509307	0.2169811
20140904-PurClathDigest-1ug-02	3467	1101	0	AGDSHASEEPEQTEPEQREPTPYPDER	27	1	Unmodified	_AGDSHASEEPEQTEPEQREPTPYPDER_					0	0	0	G3MYP5	4	HCD	FTMS	MULTI-MSMS	2	2	771.08806	3080.3231	1.5502	-4.3664565	35.345	0.0044017	85.376	85.299	NaN	NaN	1	0	0	0	-1	0	0	0	0	y1;y2;y4;y5;y6;y8;y11;y13;y14;y15;y8-H2O;y13-H2O;y16(2+);b5;b6;b7;b8;b8-H2O;b9;b9-H2O;b11;b12;b10(2+);b11(2+)	9926.5;109399.6;25462.3;3212.5;37875.3;11896.4;18796.5;261051.8;21423.8;101586.1;4659;29023.4;9336.5;13169.3;24914.7;10222.5;23385;11822.2;136494.8;10251.8;28525.6;7540.1;11691.7;3715.6	0.0006584696;0.002193552;0.005666605;0.007766966;0.003566814;0.002697845;0.01760574;0.01065319;-0.0008495043;0.01437645;0.001467042;0.006795966;0.01366038;0.001840973;0.007068799;0.003343415;0.008251658;0.01408396;0.006484719;0.01317082;-0.001596384;-0.004657929;0.003182309;-0.000985899	3.760142;7.21185;10.97678;11.43383;4.594315;2.768568;12.68752;6.601532;-0.4874368;7.797055;1.533848;4.258823;13.84813;3.932175;13.10946;5.338791;10.92519;19.10283;7.332905;15.20328;-1.43762;-3.760954;6.478695;-1.774089	175.11829371143;304.15935172553;516.235585556413;679.296813733219;776.353777737547;974.455089032312;1387.64246277524;1613.74477227272;1742.798868062;1843.83132057696;956.445755148958;1595.73806480901;986.442115126206;468.181896309071;539.213782270976;626.249536064465;755.287220918815;737.270823929677;884.331580952818;866.314330165721;1110.43501900447;1238.49665806097;491.195870687058;555.72133544…	24	0.5786784	0.2666667
20140904-PurClathDigest-1ug-03	3267	1030	0	AGDSHASEEPEQTEPEQREPTPYPDER	27	1	Unmodified	_AGDSHASEEPEQTEPEQREPTPYPDER_					0	0	0	G3MYP5	4	HCD	FTMS	MULTI-MSMS	4	1	771.08806	3080.3231	1.5829	-4.496313	35.213	0.00014017	92.518	91.404	NaN	NaN	1	0	0	0	-1	0	0	0	0	y1;y2;y4;y6;y8;y11;y13;y14;y15;y16;y2-H2O;y4-NH3;y13-NH3;y14-H2O;y6(2+);b5;b5-H2O;b6;b6-H2O;b7;b7-H2O;b8;b8-H2O;b9;b9-H2O;b11;b12;b9(2+);b10(2+);b11(2+);b13(2+)	21065.9;132781.9;29782.2;43854.1;18672.4;33156.4;308264.7;40338.7;95997.1;40611.8;2434;8312.2;18211.4;17071.9;2875.6;19648.9;7608.8;30763.6;1868.9;13347.6;2766;43325.3;10614.8;151523.6;18413.3;32343.5;2712.6;3845.7;9879.9;2298.7;4224.7	0.0006201506;0.002018374;0.004417062;0.00430954;0.00748228;0.002419186;0.008776523;0.01586699;0.009554435;0.00797438;0.004355033;0.004002002;-0.0001471614;0.01254561;-0.001960273;0.002691119;0.00168393;0.003101334;0.004398478;0.006391367;0.002040508;0.006739026;0.001812885;0.005928691;0.003801967;0.01149502;0.01961482;0.001439294;0.004389848;0.004937834;0.00306999	3.541323;6.635906;8.55627;5.551006;7.678463;1.743359;5.438601;9.104405;5.181825;4.044016;15.21959;8.016658;-0.09216426;7.273768;-5.043355;5.748032;3.740641;5.751543;8.439041;10.20583;3.354772;8.922451;2.458872;6.704145;4.388621;10.35194;15.83791;3.251384;8.937084;8.885544;4.580226	175.118332030366;304.159526903373;516.236835099247;776.353035011143;974.450304597262;1387.65764932722;1613.74664893861;1742.78215156315;1843.83614259586;1971.89630016369;286.146625557998;499.210701058274;1596.72902352135;1724.77490825777;388.684270781637;468.181046162863;450.171488666122;539.217749736243;521.205887905905;626.246488112759;608.240274286208;755.288733549753;737.283095005055;884.3321…	31	0.5310845	0.2384615
20140904-PurClathDigest-1ug-03	3300	1059	0	AGDSHASEEPEQTEPEQREPTPYPDER	27	1	Unmodified	_AGDSHASEEPEQTEPEQREPTPYPDER_					0	0	0	G3MYP5	4	HCD	FTMS	MULTI-MSMS	5	1	771.08806	3080.3231	1.5829	321.31366	35.373	0.034983	48.771	48.694	NaN	NaN	1	0	0	0	-1	0	0	0	0	y1;y2;y4;y6;y8;y13;y15;y4-NH3;y13-H2O;y6(2+);y11(2+);y14(2+);y16(2+);b5;b5-H2O;b6;b7;b7-H2O;b8;b9;b9-H2O;b11;b10(2+)	6148.8;30825.4;7614.9;5559.1;3929.6;74148.6;25411.7;1767.9;5083.8;1234.6;4150.5;6237.5;2924.7;3419;1355.3;8568.8;2178.8;2037.6;9029.6;37012.9;1784;7308.6;1980.8	0.0005465458;0.001684714;0.007823788;0.0002197886;0.006305191;0.0121434;0.001917789;-0.001334743;0.02282587;0.005095825;-0.004076564;-0.002754925;-0.0004309569;0.001584715;-0.003977094;0.004616032;0.00280744;-0.005501451;0.007116413;0.006293464;0.006995917;0.008379689;0.0009493687	3.121007;5.53891;15.15552;0.2831025;6.470503;7.524992;1.040104;-2.673678;14.30442;13.11069;-5.871154;-3.159661;-0.4368738;3.384826;-8.83451;8.560633;4.482938;-9.044752;9.422113;7.116632;8.075438;7.54638;1.932761	175.118405635222;304.159860563065;516.233428373669;776.35712476287;974.451481686623;1613.74328205768;1843.84377924288;499.216037802745;1595.72203490328;388.677214684145;694.337749053598;871.90540243739;986.456206461759;468.182152567009;450.177149690287;539.21623503816;626.250072039541;608.247816244717;755.288356163347;884.331772208735;866.320505068926;1110.42504293088;491.198103626799	23	0.365052	0.2613636
20140904-PurClathDigest-1ug-03	3272	1034	0	AGDSHASEEPEQTEPEQREPTPYPDER	27	1	Unmodified	_AGDSHASEEPEQTEPEQREPTPYPDER_					0	0	0	G3MYP5	3	HCD	FTMS	MULTI-MSMS	1	1	1027.7817	3080.3231	0.50793	-7.0686189	35.237	0.010833	78.098	77.702	NaN	NaN	1	0	0	0	-1	0	0	0	0	y2;y4;y6;y8;y13;y16;y18;y19;y21;y22;y4-NH3;y8-H2O;y13-NH3;y11(2+);y17(2+);y20(2+);b5;b5-H2O;b6;b6-H2O;b7;b8;b8-H2O;b9;b14	145637.8;11131.6;12980.5;17048.6;63311.8;11709.3;182571.3;51319.9;205338;180726.2;3555.8;5460;7771.4;13178.1;4181.9;27466.1;60206;15829.8;55752.8;4859.8;16269.6;16112.5;8269.2;32064.9;6490.1	0.001833676;0.004420727;-0.0003440757;-0.0008193504;0.01239464;0.01449663;0.01415932;0.0164035;0.02634118;0.02008962;-0.007367374;0.008158888;-0.005789348;0.005965923;0.02055425;0.01101565;0.004479154;0.001073863;0.003373439;-0.00160443;0.004915346;0.008592763;0.002301499;0.00861284;0.01112567	6.028663;8.563371;-0.4431922;-0.8408262;7.680675;7.351641;6.441954;7.049126;10.35794;7.685002;-14.75771;8.530483;-3.625742;8.592374;19.55766;8.966494;9.567178;2.385449;6.256176;-3.078269;7.848881;11.37682;3.121597;9.739403;7.575844	304.159711600888;516.236831433651;776.357688627165;974.45860622796;1613.74303082589;1971.88977791658;2197.98547217094;2327.02582108955;2543.09050491117;2614.13387025647;499.222070433917;956.439063303505;1596.73466570844;694.327706567118;1050.95651780101;1228.53503142337;468.179258128253;450.172098733188;539.217477631002;521.211890813944;626.247964134091;755.286879812757;737.282606390903;884.32945…	25	0.4763461	0.2777778
20140904-PurClathDigest-1ug-01	2918	495	0	AGEPQDQAVEQK	12	0	Unmodified	_AGEPQDQAVEQK_					0	0	0	F1N3M8;G3MYP5	2	HCD	FTMS	MULTI-MSMS	7	0	650.31241	1298.6103	-0.046222	-6.6312915	31.723	0.00020018	120.84	69.562	NaN	NaN	1	0	0	0	-1	0	0	0	0	y1;y2;y3;y4;y5;y6;y7;y8;y9;y11;y2-NH3;y3-H2O;y6-H2O;y6-NH3;y7-H2O;y7-NH3;y8-H2O;y8-NH3;y9-NH3;b3;b3-H2O;b5;b6;b6-H2O;b8;b8-NH3;b9;b9-H2O;b9-NH3	178604.3;221849.7;234341.3;184988.7;218606;138715.2;544337.1;298379.1;1262623;3177.5;240449.3;303745.5;22952.1;111301.9;14788;55561.8;96734.3;197517.2;279329.5;157933.4;49260;9545.1;12406.5;36064.2;21052.9;5826.8;49726.5;5749.5;18179.2	0.0008693573;0.001438547;0.002227693;0.002240278;0.002932281;0.004364247;0.004607175;0.004245606;0.005796891;0.005123404;0.001293568;0.001814989;0.002569611;0.002252691;0.008612048;0.004309312;0.006146343;0.004743279;0.004271037;0.001694849;0.00117693;-0.0001582382;-0.0004386275;0.006038595;0.008665403;0.009877144;0.009816199;-0.004515828;0.001123507	5.909495;5.22785;5.511204;4.451355;5.105688;6.213568;5.636374;4.490522;5.560511;4.1702;5.011041;4.69959;3.754738;3.286924;10.77333;5.384121;6.627165;5.108912;4.164893;6.566464;4.9019;-0.3274662;-0.7331877;10.40724;10.86798;12.65804;10.95068;-5.140942;1.277608	147.111934813328;275.169943134791;404.21174708486;503.280148416012;574.31657020131;702.373715747082;817.400415850725;945.459354931124;1042.51056749802;1228.57529780426;258.143539012552;386.20159510283;684.364945696207;685.349278201201;799.385846291287;800.374164612465;927.446889507484;928.432308156021;1025.48554425004;258.106752225421;240.096705457836;483.219946675806;598.247170097089;580.2301281…	29	0.5543953	0.2056738
20140904-PurClathDigest-1ug-02	2639	377	0	AGEPQDQAVEQK	12	0	Unmodified	_AGEPQDQAVEQK_					0	0	0	F1N3M8;G3MYP5	2	HCD	FTMS	MULTI-MSMS	6	0	650.31241	1298.6103	0.041677	-7.2473347	31.736	3.3931E-06	145.29	83.514	NaN	NaN	1	0	0	0	-1	0	0	0	0	y1;y2;y3;y4;y5;y6;y7;y8;y9;y11;y2-NH3;y3-H2O;y6-H2O;y6-NH3;y7-H2O;y7-NH3;y8-H2O;y8-NH3;y9-H2O;y9-NH3;y8(2+);b3;b3-H2O;b6;b6-H2O;b7;b8;b8-H2O;b9;b9-H2O;b9-NH3	125847.7;152863.3;166241.4;130938.2;161074.3;104373.9;358632.7;186449.2;842424.8;2826.4;172026.1;226305.4;20465.9;68844.7;12369.4;35684.8;68282;139167.7;10698.2;181664.2;12340.4;102677.5;34773.8;6565.7;32652.1;4977.2;11111.3;13083;25568.5;3794.2;11170.3	0.0009982926;0.00197272;0.002772204;0.005277514;0.003741555;0.004501839;0.004586457;0.006521557;0.006908132;0.01454485;0.001661608;0.002253619;0.004589523;0.005323373;0.01375811;0.007297338;0.007209195;0.00566576;0.01171287;0.006347487;0.005604994;0.00184297;0.00164602;0.002922793;0.005846754;0.0109423;0.0108949;0.0084453;0.001172724;0.00452827;0.003536807	6.785945;7.169113;6.858305;10.4863;6.514804;6.409465;5.611028;6.897783;6.626446;11.83888;6.436768;5.83535;6.70627;7.767422;17.21096;9.117443;7.773171;6.102508;11.43283;6.189751;11.84413;7.140346;6.855666;4.885621;10.07661;15.06592;13.6642;10.83671;1.308246;5.155159;4.021929	147.111805877995;275.16940896158;404.211202574614;503.277111179872;574.315760927207;702.373578154296;817.400436568561;945.457078979742;1042.50945625674;1228.56587636125;258.143170972681;386.20115647296;684.36292578461;685.346207518814;799.380700229391;800.371176585557;927.445826655348;928.431385675329;1024.4940868358;1025.48346780095;473.229833507413;258.106604103826;240.096236368249;598.24380867…	31	0.5568537	0.2262774
20140904-PurClathDigest-1ug-02	2702	432	0	AGEPQDQAVEQK	12	0	Unmodified	_AGEPQDQAVEQK_					0	0	0	F1N3M8;G3MYP5	2	HCD	FTMS	MULTI-MSMS	5	0	650.31241	1298.6103	0.041677	-6.4772807	32.018	0.00021327	119.39	58.225	NaN	NaN	1	0	0	0	-1	0	0	0	0	y1;y2;y3;y4;y5;y6;y7;y8;y9;y2-NH3;y3-H2O;y6-H2O;y6-NH3;y7-NH3;y8-H2O;y8-NH3;y9-NH3;y9(2+);b3;b3-H2O;b9	23133.5;25693;29219.1;18540.4;26170.2;13971.1;58406.5;31272;53989.7;28754.2;37302.5;2274.6;7627.9;4086.8;3945.3;17233.1;1622.1;81259.2;18500.4;5712.6;7674.9	0.001137669;0.001660097;0.002239795;0.003792672;0.00246411;0.004879517;0.003847051;0.005458707;0.007446663;0.001840711;0.002679265;0.0006828898;0.004229729;0.01022798;0.004650506;0.005068308;0.002073513;0.003832645;0.002265887;0.001230697;0.002495395	7.733371;6.032994;5.541143;7.535929;4.290506;6.947186;4.706442;5.77361;7.143022;7.130588;6.937493;0.9978418;6.171658;12.77909;5.014301;5.458997;2.021977;7.345638;8.778895;5.125838;2.783771	147.111666501558;275.169721584843;404.211734983218;503.278596022696;574.317038371753;702.373200475983;817.401175974205;945.458141830455;1042.50891772574;258.142991869312;386.200730827109;684.366832417487;685.347301162883;800.368245947878;927.448385345148;928.431983127737;1025.48774177468;521.757987782398;258.106181187001;240.096651691315;896.408341289761	21	0.5182831	0.2121212
20140904-PurClathDigest-1ug-03	2498	357	0	AGEPQDQAVEQK	12	0	Unmodified	_AGEPQDQAVEQK_					0	0	0	F1N3M8;G3MYP5	2	HCD	FTMS	MULTI-MSMS	3	0	650.31241	1298.6103	0.45757	-6.4772807	31.795	8.5759E-06	142.1	70.483	NaN	NaN	1	0	0	0	-1	0	0	0	0	y1;y2;y3;y4;y5;y6;y7;y8;y9;y2-NH3;y3-H2O;y6-H2O;y6-NH3;y7-NH3;y8-H2O;y8-NH3;y9-H2O;y9-NH3;y9(2+);b3;b3-H2O;b8;b9;b9-NH3	102053;117172.1;116617.7;95458.1;95680.5;70229.4;238499.8;124850.9;221000.1;120978.4;143619.4;18011.4;48395.2;23806.8;18666.1;81050.4;10301.1;13610.7;319510.6;71069.8;22879.9;5617.4;21828.4;6503.7	0.0009012052;0.001940509;0.00236617;0.00310747;0.004070553;0.004316134;0.004608267;0.004062782;0.007522177;0.001522521;0.002424679;0.003394936;0.002772883;2.343962E-05;0.002477562;0.006251608;-0.002998919;0.005540523;0.003349915;0.001903351;0.000763452;0.01012245;0.004631225;-0.002072101	6.125984;7.052053;5.85379;6.174444;7.087662;6.145068;5.637711;4.29715;7.215456;5.897968;6.278284;4.960716;4.045944;0.02928568;2.671368;6.733521;-2.927178;5.402835;6.420433;7.374283;3.179763;12.69539;5.166436;-2.356303	147.111902965402;275.169441172551;404.211608608448;503.279281224603;574.315431928715;702.373763859235;817.40041475828;945.459537755247;1042.50884221159;258.1433100596;386.200985412507;684.364120371116;685.348758009532;800.378450484476;927.450558288646;928.430799826963;1024.50879862203;1025.48427476465;521.758470512496;258.106543723344;240.097118935877;797.33230032053;896.406205459885;879.38635968…	24	0.5094026	0.2068966
20140904-PurClathDigest-1ug-03	2564	415	0	AGEPQDQAVEQK	12	0	Unmodified	_AGEPQDQAVEQK_					0	0	0	F1N3M8;G3MYP5	2	HCD	FTMS	MULTI-MSMS	5	0	650.31241	1298.6103	0.45757	-7.5553563	32.112	0.00010704	131.17	78.683	NaN	NaN	1	0	0	0	-1	0	0	0	0	y1;y2;y3;y4;y5;y6;y7;y8;y9;y2-NH3;y3-H2O;y6-H2O;y6-NH3;y7-NH3;y8-H2O;y8-NH3;y9-NH3;y9(2+);b3;b3-H2O;b8;b9	13784.4;14977.3;15350.7;11330.2;12672.1;9111.1;32892.3;18361.5;24152.1;15074.7;21024.9;2689.8;6834.3;3878.4;1648.3;11727.5;1153.4;47001;10725.7;3384.2;1033.6;2969.9	0.001024532;0.001790548;0.002511476;0.004823332;0.004806888;0.005894531;0.004234781;0.004841555;0.007477802;0.001587171;0.002458167;0.01177554;0.006090001;0.01141839;-0.003858597;0.005421076;0.007872377;0.003871453;0.001559577;0.001559973;0.001084491;-0.0006205671	6.964312;6.507071;6.213273;9.583841;8.369781;8.392319;5.180789;5.120852;7.17289;6.148412;6.364995;17.20675;8.886031;14.26645;-4.160406;5.83896;7.676758;7.420016;6.04237;6.497279;1.360134;-0.6922793	147.111779638253;275.169591133923;404.211463302303;503.277565362332;574.31469559398;702.372185462688;817.400788244887;945.458758981969;1042.50888658702;258.143245409496;386.200951924675;684.355739765796;685.345440891179;800.367055529003;927.456894447484;928.431630360056;1025.48194291133;521.757948975159;258.10688749691;240.096322415145;797.34133827748;896.411457252078	22	0.5192603	0.2391304
20140904-PurClathDigest-1ug-01	4725	2076	0	AGFAGDQIPK	10	0	Unmodified	_AGFAGDQIPK_					0	0	0	F2Z4F0	2	HCD	FTMS	MULTI-MSMS	6	0	502.264	1002.5134	0.73157	-4.5864243	38.761	0.032484	81.017	63.786	NaN	NaN	1	0	0	0	-1	0	0	0	0	y1;y2;y3;y4;y5;y6;y7;y8;y9;y4-NH3;y7-NH3;b3;b4;b6;b6-H2O;b7;b7-H2O	355651.8;3105677;202437.3;174022.9;129635.1;1376428;1531511;109256.1;123284.9;113210.2;16402.5;811480.2;52976.9;117115.8;56606.4;19821.9;48520.4	0.001006491;0.001529342;0.001875153;0.003735256;0.002475563;0.004339216;0.005427772;0.007951403;0.003107849;0.00363066;-0.0008179244;0.001799597;0.003286595;0.003581713;0.004181928;-0.002756648;0.006291675	6.841675;6.263582;5.248887;7.696727;4.123652;6.601051;7.451756;9.082603;3.332883;7.753215;-1.149791;6.517151;9.466868;6.898308;8.343747;-4.258811;9.998506	147.11179767941;244.164038681042;357.247756849825;485.304474258546;600.332676983089;657.352277054296;728.388302285948;875.454192571187;932.48049984882;468.278029752681;711.367998880737;276.132468297232;347.168095087222;519.216206724186;501.205041823498;647.281122597209;629.261509587598	17	0.529838	0.1931818
20140904-PurClathDigest-1ug-02	4366	1888	0	AGFAGDQIPK	10	0	Unmodified	_AGFAGDQIPK_					0	0	0	F2Z4F0	2	HCD	FTMS	MULTI-MSMS	5	0	502.264	1002.5134	0.27335	-4.5864243	39.164	0.0088404	98.04	77.068	NaN	NaN	1	0	0	0	-1	0	0	0	0	y1;y2;y3;y4;y5;y6;y7;y8;y9;y2-NH3;y4-NH3;y6-NH3;y7-H2O;y7-NH3;y9-NH3;b3;b4;b6;b6-H2O;b7;b7-H2O	171807.7;1549068;117533.5;113744.6;78297.4;801483;879820.6;58094.7;93366.3;26780.3;58292.5;7190.6;7643.7;9659.1;2324.3;493225.9;39716.2;64572.1;23851.7;16844.6;29790.8	0.0008061267;0.001397271;0.001597378;0.003296077;0.003790533;0.003372014;0.004433682;0.005000623;0.005040451;-0.002749715;0.004178352;0.005820191;0.008832056;-0.0007648963;-0.002488982;0.001507468;0.001036633;0.003281464;0.004842993;0.004292284;0.005696081	5.479681;5.722669;4.471342;6.791765;6.314069;5.129683;6.086967;5.712013;5.405434;-12.10572;8.922812;9.089443;12.43296;-1.075247;-2.718833;5.459214;2.98595;6.32003;9.66271;6.631323;9.052001	147.111998043877;244.164170751882;357.248034624951;485.304913437468;600.331362013074;657.35324425637;728.389296375897;875.457143350871;932.47856724657;227.141768636022;468.27748206118;640.324246977702;710.374333315124;711.367945852665;915.459547577822;276.132760426507;347.17034504888;519.216506973568;501.204380758488;647.274073665479;629.262105181485	21	0.5102036	0.1707317
20140904-PurClathDigest-1ug-03	4173	1823	0	AGFAGDQIPK	10	0	Unmodified	_AGFAGDQIPK_					0	0	0	F2Z4F0	2	HCD	FTMS	MULTI-MSMS	6	0	502.264	1002.5134	0.42692	-4.1874271	39.287	0.017409	90.142	72.63	NaN	NaN	1	0	0	0	-1	0	0	0	0	y1;y2;y3;y4;y5;y6;y7;y8;y9;y2-NH3;y4-NH3;y6-NH3;y7-H2O;y7-NH3;b3;b4;b6;b6-H2O;b7;b7-H2O	119509.8;1169424;90304;73477.5;50266.2;599081.4;659404.7;50932.3;62118.7;20569.6;37325.1;9696;3945.8;9366.1;356417.4;23456;45358.1;14935.1;15763.2;18189.9	0.0008350381;0.001407241;0.001808579;0.003128028;0.002364613;0.003342206;0.004292603;0.0046702;0.006240265;-0.0008698449;0.003112936;0.007050654;-0.002842209;0.003288902;0.001560451;0.002088697;0.003466241;0.002287543;0.003196809;0.005150081	5.676208;5.763502;5.062534;6.445488;3.938838;5.084337;5.89328;5.334583;6.692136;-3.829556;6.647616;11.01109;-4.000936;4.623374;5.651091;6.016364;6.675909;4.564068;4.938872;8.184311	147.111969132439;244.16416078212;357.247823423688;485.305081486065;600.332787932952;657.353274064291;728.38943745515;875.45747377344;932.477367432833;227.139888766038;468.278547476727;640.323016514541;710.386007580342;711.363892054669;276.132707443112;347.169292985133;519.216322196581;501.20693620853;647.27516913966;629.26265118167	20	0.512679	0.1694915
20140904-PurClathDigest-1ug-01	3342	866	0	AGGVSGTHHPRPGHDPPPLPQPDPR	25	1	Unmodified	_AGGVSGTHHPRPGHDPPPLPQPDPR_					0	0	0	F1N3M8;G3MYP5	4	HCD	FTMS	MULTI-MSMS	7	1	644.82709	2575.2793	-1.0234	-6.5064984	33.371	0.043301	45.099	42.604	NaN	NaN	1	0	0	0	-1	0	0	0	0	y1;y2;y4;y5;y6;y7;y8;y10;y2-NH3;y4-NH3;y5-NH3;y6-NH3;y6(2+);b3;b4;b9;b15;b16;b17;b19;b14(2+);b18(2+)	96318.7;1573378;99159;27964.4;493175.6;22649.1;76796.2;26097.2;58621.4;12047.6;22579.5;10789.5;26048.9;57920.2;16448.3;61322.1;1196606;806127.4;51237.8;174214.7;32114.9;17094.8	0.001071904;0.001314121;0.002077871;0.002699334;0.003876482;0.002789749;0.004028406;-0.01005263;0.002279528;0.004174498;0.007496398;-0.004877733;-0.0003996948;0.001683097;0.001208897;0.005878649;0.01022348;0.00935876;0.003780908;0.01683133;0.0004598724;-0.004010297	6.121042;4.828303;4.290911;4.408463;5.464768;3.392023;4.381105;-9.027026;8.93432;8.934745;12.59315;-7.045275;-1.125313;9.044744;4.239445;7.308399;6.984788;5.996391;2.280691;9.010762;0.68146;-4.567895	175.117880277028;272.170401911649;484.24934504626;612.307301094535;709.358887798669;822.444038511981;919.495563706512;1113.61517244984;255.142887403021;467.220699317599;595.27595492887;692.341092912061;355.18542006829;186.085634604661;285.154522720767;804.36884730138;1463.67845981698;1560.732088392;1657.79043009665;1867.9142075062;674.834048495023;877.931135958775	22	0.6136593	0.2095238
20140904-PurClathDigest-1ug-02	3077	760	0	AGGVSGTHHPRPGHDPPPLPQPDPR	25	1	Unmodified	_AGGVSGTHHPRPGHDPPPLPQPDPR_					0	0	0	F1N3M8;G3MYP5	4	HCD	FTMS	MULTI-MSMS	4	1	644.82709	2575.2793	-1.395	-6.0405295	33.66	0.015863	71.696	68.651	NaN	NaN	1	0	0	0	-1	0	0	0	0	y1;y2;y4;y5;y6;y7;y8;y9;y10;y12;y1-NH3;y2-NH3;y4-NH3;y5-NH3;y6-NH3;y12-NH3;y6(2+);y10(2+);b3;b4;b8;b8-H2O;b9;b11;b14;b15;b16;b19;b17(2+)	38237.2;687351.5;45929.4;10571.9;209092.9;10869.9;38655.4;5170.2;11247.6;15478.7;3442.9;24186.1;7382.3;4978.8;4799.2;31510.9;18139.4;3146.4;22991.7;14967.4;12295.9;6532.1;27063.1;8786.1;31510.9;536559.8;339162.2;51596.6;10778.3	0.001138814;0.001553064;0.003642588;0.003421826;0.004491888;0.0114244;0.007596494;0.002031557;-0.008424787;0.02292222;0.001326798;0.001293288;0.008308384;0.003710265;-0.001051893;0.00507372;0.002085409;0.001353742;0.00109657;0.0005616975;0.002004636;0.003554547;0.004620964;0.009833597;0.002388378;0.01130271;0.008998888;0.02197337;0.0005915152	6.503133;5.706223;7.522157;5.588419;6.332325;13.89093;8.261621;1.998482;-7.56527;16.78462;8.392615;5.068858;17.78272;6.23281;-1.519337;3.762047;5.871367;2.429087;5.892805;1.969796;3.004039;5.474414;5.744823;9.298744;1.770928;7.722133;5.76581;11.76362;0.7131843	175.117813366625;272.170162969336;484.247780329117;612.3065786025;709.358272392832;822.435403865174;919.491995618907;1016.5503244074;1113.61354460394;1365.66805249211;158.091076281999;255.143873643457;467.216565431818;595.279741061698;692.337267072231;1348.65935189002;355.182934964385;557.304844399781;186.086221131918;285.155169920285;667.313809451298;649.301694855013;804.37010498616;1057.5187672…	29	0.6249594	0.2592593
20140904-PurClathDigest-1ug-01	3873	1330	0	AGLLQR	6	0	Unmodified	_AGLLQR_					0	0	0	P49951;F1MPU0	2	HCD	FTMS	MULTI-MSMS	2	0	329.20576	656.39696	-0.26119	-6.5686337	35.433	0.010454	105.82	21.637	NaN	NaN	1	0	0	0	-1	0	0	0	0	y1;y2;y3;y4;y5;y1-NH3;y2-NH3;y3-NH3;y4-NH3;y5-NH3;b3;b4	6342790;7236811;1.745672E+07;5040722;1.293732E+07;711331.8;3824971;1746956;296548.8;592633.6;2481903;124879.1	0.00102111;0.001750011;0.002609984;0.002987583;0.003751985;0.0008568495;0.001576018;0.002159331;0.003224178;0.003010421;0.00146105;0.0004883159	5.830985;5.772265;6.270097;5.643949;6.398738;5.419958;5.507674;5.408701;6.29334;5.287586;6.033694;1.374634	175.117931071012;303.175779681315;416.258983688721;529.342670070506;586.36336939127;158.091546229985;286.149404573259;399.232885239869;512.315884373576;569.33756185418;242.148456908702;355.233493622919	12	0.785368	0.1428571
20140904-PurClathDigest-1ug-01	3936	1385	0	AGLLQR	6	0	Unmodified	_AGLLQR_					0	0	0	P49951;F1MPU0	2	HCD	FTMS	MULTI-MSMS	1	0	329.20576	656.39696	-0.26119	-6.2639401	35.697	0.010454	105.82	13.099	NaN	NaN	1	0	0	0	-1	0	0	0	0	y1;y2;y3;y4;y5;y1-NH3;y2-NH3;y3-NH3;y4-NH3;y5-NH3;b3;b4	3.563234E+07;4.905278E+07;1.216642E+08;3.710177E+07;9.437066E+07;3240440;2.089006E+07;9606051;1501221;3666043;1.605366E+07;826186.6	0.0009780523;0.001791338;0.002613778;0.002844246;0.00382828;0.0008626886;0.001576939;0.002520409;0.003269456;0.003046884;0.001426038;0.001058186	5.585105;5.908581;6.27921;5.373164;6.528854;5.456893;5.510894;6.313137;6.38172;5.35163;5.889103;2.97885	175.117974128681;303.175738354057;416.258979895315;529.342813407377;586.363293096553;158.091540390889;286.149403651846;399.232524161947;512.315839095301;569.337525391486;242.148491920851;355.232923753267	12	0.8118947	0.1846154
20140904-PurClathDigest-1ug-01	4000	1441	0	AGLLQR	6	0	Unmodified	_AGLLQR_					0	0	0	P49951;F1MPU0	2	HCD	FTMS	MULTI-MSMS	1	0	329.20576	656.39696	-0.26119	-6.2639401	35.954	0.010454	105.82	17.831	NaN	NaN	1	0	0	0	-1	0	0	0	0	y1;y2;y3;y4;y5;y1-NH3;y2-NH3;y3-NH3;y4-NH3;y5-NH3;b3;b4	1.317495E+07;1.722619E+07;4.271218E+07;1.26864E+07;3.217473E+07;1071259;6764932;3207449;647395.1;1281383;6009443;208385.5	0.001085684;0.001937794;0.002794117;0.003190584;0.004129182;0.0008936978;0.001727444;0.00240324;0.003629333;0.002948805;0.001470322;0.002515427	6.199732;6.391654;6.712452;6.027447;7.042023;5.653041;6.036865;6.019649;7.084176;5.179362;6.071985;7.081093	175.117866497142;303.175591898818;416.258799555488;529.342467069573;586.362992195067;158.091509381732;286.149253146557;399.232641330815;512.315479218555;569.337623469937;242.148447636622;355.231466511767	12	0.8133402	0.173913
20140904-PurClathDigest-1ug-01	4073	1505	0	AGLLQR	6	0	Unmodified	_AGLLQR_					0	0	0	P49951;F1MPU0	2	HCD	FTMS	MULTI-MSMS	2	0	329.20576	656.39696	-0.26119	-4.7404717	36.235	0.010454	105.82	23.435	NaN	NaN	1	0	0	0	-1	0	0	0	0	y1;y2;y3;y4;y5;y1-NH3;y2-NH3;y3-NH3;y4-NH3;y5-NH3;b3	1176922;1305230;2994007;817309.9;2138809;117004.8;653922.4;273472.4;66951.4;104836.5;435387.8	0.0009923581;0.001815017;0.002519561;0.002969486;0.003760214;0.0009349501;0.001565426;0.002282351;0.001105765;0.002543081;0.001536658	5.666798;5.986682;6.052866;5.609761;6.412771;5.913982;5.470659;5.716842;2.158356;4.466733;6.345936	175.117959822971;303.175714675655;416.259074112392;529.342688167337;586.363361163077;158.091468129423;286.149415165131;399.23276222066;512.318002787219;569.338029194101;242.148381300358	11	0.7906614	0.2037037
20140904-PurClathDigest-1ug-01	4140	1564	0	AGLLQR	6	0	Unmodified	_AGLLQR_					0	0	0	P49951;F1MPU0	2	HCD	FTMS	MULTI-MSMS	5	0	329.20576	656.39696	-0.26119	-6.8733274	36.497	0.010454	105.82	23.435	NaN	NaN	1	0	0	0	-1	0	0	0	0	y1;y2;y3;y4;y5;y1-NH3;y2-NH3;y3-NH3;y4-NH3;y5-NH3;b3;b4	608004.4;798164.1;2069975;604641.7;1565279;59347.6;344040.7;163644.9;39990.3;70443;245478.9;13168.7	0.001140391;0.001964041;0.002866322;0.003146817;0.00411388;0.001197076;0.001594067;0.0025365;0.003085327;0.002792093;0.00145734;0.001410775	6.512137;6.478231;6.885914;5.944765;7.015927;7.572058;5.570752;6.35344;6.022313;4.904107;6.018374;3.971413	175.117811789749;303.175565650851;416.258727351184;529.342510836141;586.363007496607;158.091206003824;286.149386523668;399.232508071526;512.316023224429;569.337780181956;242.148460618266;355.23257116363	12	0.7925117	0.16
20140904-PurClathDigest-1ug-02	3597	1215	0	AGLLQR	6	0	Unmodified	_AGLLQR_					0	0	0	P49951;F1MPU0	2	HCD	FTMS	MULTI-MSMS	4	0	329.20576	656.39696	-1.0162	-5.9592464	35.889	0.010473	106.05	16.591	NaN	NaN	1	0	0	0	-1	0	0	0	0	y1;y2;y3;y4;y5;y1-NH3;y2-NH3;y3-NH3;y4-NH3;y5-NH3;b3;b4	1.327558E+07;1.616692E+07;979591.4;1.133465E+07;2.955022E+07;1275377;8140920;3841033;753356.3;1444719;5185760;325900.2	0.001014597;0.001744243;0.002333945;0.002905701;0.003732073;0.0009319109;0.001528649;0.002366277;0.00201241;0.002649151;0.001379112;0.003371806	5.793794;5.753239;5.606949;5.489261;6.364779;5.894758;5.342136;5.927063;3.928055;4.653039;5.695316;9.491879	175.117937583768;303.175785449524;416.259259728143;529.342751952644;586.363389303599;158.091471168576;286.149451941639;399.232678293896;512.317096142016;569.337923123893;242.148538846051;355.230610132729	12	0.5602672	0.1363636
20140904-PurClathDigest-1ug-02	3658	1268	0	AGLLQR	6	0	Unmodified	_AGLLQR_					0	0	0	P49951;F1MPU0	2	HCD	FTMS	MULTI-MSMS	1	0	329.20576	656.39696	-1.0162	-6.5686337	36.144	0.01105	112.88	21.095	NaN	NaN	1	0	0	0	-1	0	0	0	0	y1;y2;y3;y4;y5;y1-NH3;y2-NH3;y3-NH3;y4-NH3;y5-NH3;b3;b4	1.471508E+07;2.009199E+07;5.120014E+07;1.491917E+07;3.903508E+07;999270.2;8865611;3989373;838952.3;1632112;6451635;317722.4	0.001013634;0.001810268;0.002632017;0.002733954;0.003689434;0.000943538;0.001532085;0.002066277;0.003891541;0.002977512;0.00140105;0.001973165	5.788295;5.971019;6.323029;5.164806;6.292059;5.968305;5.354142;5.175618;7.59599;5.229782;5.78591;5.554582	175.117938546782;303.175719424364;416.258961655261;529.342923699514;586.363431943126;158.09145954151;286.149448506027;399.232978294177;512.315217010394;569.337594763746;242.148516908817;355.232008773658	12	0.8061264	0.1538462
20140904-PurClathDigest-1ug-02	3722	1324	0	AGLLQR	6	0	Unmodified	_AGLLQR_					0	0	0	P49951;F1MPU0	2	HCD	FTMS	MULTI-MSMS	1	0	329.20576	656.39696	-1.0162	-4.7404717	36.41	0.010454	105.82	16.366	NaN	NaN	1	0	0	0	-1	0	0	0	0	y1;y2;y3;y4;y5;y1-NH3;y2-NH3;y3-NH3;y4-NH3;y5-NH3;b3;b4	1290265;1840659;4493538;1303379;3457170;118127.1;782172.6;343869.2;77626.5;143182.6;603659.4;34145.2	0.00102376;0.001780941;0.002541755;0.002862716;0.003661984;0.001059552;0.001423369;0.0022156;0.003365012;0.003350881;0.001392543;5.070909E-05	5.846116;5.874284;6.106186;5.408057;6.245245;6.702148;4.974215;5.549643;6.568239;5.885583;5.750782;0.1427484	175.117928421275;303.175748751886;416.259051917781;529.342794937101;586.363459393146;158.091343527891;286.149557221485;399.232828971721;512.315743539298;569.337221393915;242.148525415031;355.23393122971	12	0.8148992	0.1846154
20140904-PurClathDigest-1ug-02	3794	1387	0	AGLLQR	6	0	Unmodified	_AGLLQR_					0	0	0	P49951;F1MPU0	2	HCD	FTMS	MULTI-MSMS	1	0	329.20576	656.39696	-1.0162	-6.5686337	36.722	0.010454	105.82	27.82	NaN	NaN	1	0	0	0	-1	0	0	0	0	y1;y2;y3;y4;y5;y1-NH3;y2-NH3;y3-NH3;y4-NH3;y5-NH3;b3;b4	312409.4;452199.2;1086495;336790.3;835704.5;24685.3;179617.4;86971.1;16726.1;34350.8;148135.9;4147.1	0.001021687;0.001823495;0.002635784;0.002721394;0.003849996;0.0008585781;0.001479551;0.002488673;0.001463325;0.003807062;0.001354682;0.004777437	5.834281;6.014647;6.332077;5.141079;6.565888;5.430892;5.170553;6.233642;2.856285;6.686836;5.594423;13.44889	175.117930493784;303.175706197438;416.258957889293;529.342936259584;586.363271381177;158.091544501405;286.149501039652;399.232555898599;512.317645226614;569.336765213764;242.148563276851;355.229204501612	12	0.7980065	0.1643836
20140904-PurClathDigest-1ug-03	3418	1162	0	AGLLQR	6	0	Unmodified	_AGLLQR_					0	0	0	P49951;F1MPU0	2	HCD	FTMS	MULTI-MSMS	3	0	329.20576	656.39696	-1.1505	-6.2639401	35.878	0.011024	112.58	23.228	NaN	NaN	1	0	0	0	-1	0	0	0	0	y1;y2;y3;y4;y5;y1-NH3;y2-NH3;y3-NH3;y4-NH3;y5-NH3;b3;b4	1.363092E+07;1.62164E+07;3.965727E+07;1.201876E+07;2.98543E+07;1329512;7854880;3645969;631264.4;1494792;5510926;283936.7	0.00107416;0.001795155;0.002737123;0.003028126;0.003785097;0.000949555;0.001620942;0.002415766;0.00358181;0.002836593;0.001421599;0.004582344	6.133924;5.921169;6.57553;5.720541;6.455207;6.006365;5.664673;6.051023;6.991414;4.982268;5.870774;12.89967	175.117878021388;303.175734537695;416.25885655021;529.342629527306;586.363336280314;158.091453524491;286.149359648422;399.232628805369;512.315526741934;569.337735682203;242.148496359261;355.229399594948	12	0.7935463	0.1333333
20140904-PurClathDigest-1ug-03	3480	1216	0	AGLLQR	6	0	Unmodified	_AGLLQR_					0	0	0	P49951;F1MPU0	2	HCD	FTMS	MULTI-MSMS	1	0	329.20576	656.39696	-1.1505	-6.8733274	36.149	0.011024	112.58	23.228	NaN	NaN	1	0	0	0	-1	0	0	0	0	y1;y2;y3;y4;y5;y1-NH3;y2-NH3;y3-NH3;y4-NH3;y5-NH3;b3;b4	1.409912E+07;1.993602E+07;5.192582E+07;1.587016E+07;3.818185E+07;1508764;8206120;4249808;753244.4;1810256;6626047;335660.9	0.001185984;0.002111864;0.003027031;0.003386166;0.004378011;0.001041891;0.001794837;0.002695484;0.003120505;0.004481381;0.001561259;0.002506096	6.772494;6.965814;7.271998;6.396931;7.466387;6.590438;6.272381;6.751667;6.090978;7.871241;6.44753;7.054824	175.117766196928;303.175417828802;416.258566641299;529.342271487407;586.362743365277;158.091361188229;286.149185754319;399.232349087533;512.315988046105;569.336090894179;242.148356699559;355.231475843192	12	0.8127121	0.1690141
20140904-PurClathDigest-1ug-03	3544	1272	0	AGLLQR	6	0	Unmodified	_AGLLQR_					0	0	0	P49951;F1MPU0	2	HCD	FTMS	MULTI-MSMS	1	0	329.20576	656.39696	-1.1505	-4.1310843	36.425	0.010454	105.82	10.872	NaN	NaN	1	0	0	0	-1	0	0	0	0	y1;y2;y3;y4;y5;y1-NH3;y2-NH3;y3-NH3;y4-NH3;y5-NH3;b3;b4	1135371;1512902;3840333;1182125;2960197;95209.9;623846.1;321797.9;52342.5;111362.7;486728.3;19361.2	0.001002075;0.001750711;0.002591053;0.002861611;0.003729101;0.0007323681;0.001506975;0.002149307;0.003107939;0.003658519;0.001315899;0.003523	5.722286;5.774575;6.224617;5.40597;6.35971;4.632553;5.266391;5.383593;6.066449;6.425929;5.434262;9.917504	175.117950105933;303.175778981014;416.259002620007;529.342796042176;586.363392275586;158.091670711431;286.149473615989;399.232895263905;512.316000613078;569.336913756636;242.148602059442;355.230458939132	12	0.8107045	0.173913
20140904-PurClathDigest-1ug-03	3610	1330	0	AGLLQR	6	0	Unmodified	_AGLLQR_					0	0	0	P49951;F1MPU0	2	HCD	FTMS	MULTI-MSMS	3	0	329.20576	656.39696	-1.1505	-8.7014894	36.725	0.010454	105.82	10.872	NaN	NaN	1	0	0	0	-1	0	0	0	0	y1;y2;y3;y4;y5;y1-NH3;y2-NH3;y3-NH3;y4-NH3;y5-NH3;b3;b4	290592.8;332756.5;876105.3;224550.9;601381.1;26114.5;176123;77138.8;17965.9;28173;111324.3;3020.3	0.001166345;0.002150111;0.003048565;0.003757574;0.004395484;0.0009871242;0.001827557;0.002882112;0.003742363;0.004294276;0.001603869;0.0002254075	6.660347;7.09197;7.323729;7.098576;7.496187;6.244009;6.386727;7.219137;7.304804;7.5426;6.623498;0.6345329	175.117785835643;303.175379581596;416.258545108142;529.341900079421;586.362725892487;158.091415955296;286.149153034234;399.232162459756;512.3153661885;569.336277999711;242.148314089327;355.233756531284	12	0.7869831	0.1818182
20140904-PurClathDigest-1ug-03	3686	1397	0	AGLLQR	6	0	Unmodified	_AGLLQR_					0	0	0	P49951;F1MPU0	2	HCD	FTMS	MULTI-MSMS	7	0	329.20576	656.39696	-1.1505	-5.6545527	37.088	0.015529	100.04	18.917	NaN	NaN	1	0	0	0	-1	0	0	0	0	y1;y2;y3;y4;y5;y1-NH3;y2-NH3;y3-NH3;y4-NH3;y5-NH3;b3;b4	168051.6;175998.5;428929.2;124473.8;318441.1;14927.1;86618.4;43978.5;5318.3;17345.6;63816;2514.6	0.001172085;0.001971047;0.002883654;0.003159238;0.004257472;0.0009617102;0.001757291;0.002379655;0.004191522;0.003984519;0.001630776;0.001793419	6.693123;6.501339;6.927553;5.968231;7.260815;6.083252;6.141169;5.960572;8.181534;6.99853;6.734618;5.048584	175.117780096163;303.175558645311;416.258710018364;529.342498414653;586.362863904692;158.091441369354;286.149223300379;399.232664916412;512.314917029797;569.336587756211;242.148287182175;355.232188519487	12	0.7589406	0.1481481
20140904-PurClathDigest-1ug-01	5005	2321	0	AGPELPSGDPAPAPEGPTAPR	21	0	Unmodified	_AGPELPSGDPAPAPEGPTAPR_					0	0	0	E1BP30;F1MQZ0	2	HCD	FTMS	MULTI-MSMS	6	1	992.49216	1982.9698	0.31678	-4.2976058	39.831	0.051135	60.621	59.058	NaN	NaN	1	0	0	0	-1	0	0	0	0	y2;y5;y6;y8;y9;y10;y11;y12;y14;y15;y16;y8-NH3;y10-NH3;y16-H2O;y8(2+);y10(2+);b3;b4;b4-H2O;b5;b5-H2O	16968.5;5246.3;76665.6;44031.7;3697.6;332663.8;12220.3;409305.5;19781.5;22442.6;318630.6;3768.6;3968.4;4296.8;4805.7;8139;15644.1;61541.2;17812.9;31339.1;6759.8	0.001878795;-0.00262816;0.005143685;0.00274768;-0.0005195434;-0.003455229;0.01250671;0.008367236;-0.003091544;-0.0007698542;0.009609141;0.01370063;-0.00553799;0.01535197;0.005111504;0.006395274;0.001238391;0.002282398;-0.001074008;0.001726655;-0.004048006	6.903026;-4.855168;8.596799;3.33285;-0.5801948;-3.481271;11.75951;7.209421;-2.319834;-0.5422704;6.335435;16.96912;-5.677108;10.24343;12.38517;12.87409;5.476762;6.426413;-3.185533;3.687515;-8.990798	272.169837237613;541.311900307035;598.325592185772;824.423345139195;895.463726149849;992.519425687874;1063.54057753455;1160.59748086227;1332.65734639801;1419.68705311797;1516.72943797395;807.385843086577;975.494959347032;1498.7131304608;412.711573138552;496.755228188843;226.11737943889;355.15892852834;337.151720247997;468.24354825146;450.238758225813	21	0.696372	0.2763158
20140904-PurClathDigest-1ug-02	4613	2104	0	AGPELPSGDPAPAPEGPTAPR	21	0	Unmodified	_AGPELPSGDPAPAPEGPTAPR_					0	0	0	E1BP30;F1MQZ0	2	HCD	FTMS	MULTI-MSMS	4	1	992.49216	1982.9698	0.77081	-3.591594	40.178	0.023355	59.857	56.321	NaN	NaN	1	0	0	0	-1	0	0	0	0	y1;y2;y3;y5;y6;y8;y9;y10;y11;y12;y13;y15;y16;y8-NH3;y10-NH3;y12-NH3;y10(2+);y17(2+);b3;b4;b4-H2O;b5;b5-H2O	2170.9;8460.3;1845.6;4519.8;39107.7;25487.1;1966.9;152654.8;4621.3;215166.6;3442.8;4450.7;192712.7;3032.9;2902.2;2123.5;3869.8;1989.9;10293.7;39688.6;10373.3;11491.2;3825.4	0.0006752661;0.001948332;0.00348897;0.003535522;0.004644287;0.004309163;0.01311086;0.0002206968;0.01118179;0.009368771;0.004630716;-0.004755954;0.01107932;0.01058157;-0.0003980159;0.005101726;0.008725312;0.008502268;0.001121331;0.001950096;0.000263563;0.002641173;0.004263808	3.856057;7.158517;10.16584;6.531469;7.762133;5.226891;14.64164;0.222361;10.51372;8.072375;3.630145;-3.349992;7.304751;13.10592;-0.4080164;4.461212;17.56469;10.42703;4.959065;5.490764;0.7817373;5.640608;9.470279	175.118276914889;272.16976770118;343.205340851034;541.305736624883;598.32609158355;824.421783655627;895.450095747893;992.515749761668;1063.54190246012;1160.59647932724;1275.62816041468;1419.69103921762;1516.72796779485;807.388962143281;975.489819372891;1143.57419727042;496.752898151249;815.40669151354;226.117496498538;355.159260830508;337.15038267685;468.242633733471;450.230446412234	23	0.6763601	0.3108108
20140904-PurClathDigest-1ug-01	8445	5331	0	AGTFQAFEQFGQQLLAHGHYASPEIK	26	0	Unmodified	_AGTFQAFEQFGQQLLAHGHYASPEIK_					0	0	0	E1BFB0	4	HCD	FTMS	MULTI-MSMS	6	1	719.60951	2874.4089	0.61957	-0.28973585	52.913	1.8226E-12	131.94	130.53	NaN	NaN	1	0	0	0	-1	0	0	0	0	y1;y2;y4;y5;y6;y7;y8;y9;y10;y11;y12;y13;y16;y17;y19;y20;y12-NH3;y17-NH3;y14(2+);b3;b3-H2O;b4;b4-H2O;b5;b6;b6-H2O;b7;b7-H2O;b7-NH3;b8;b8-H2O;b8-NH3;b9;b9-H2O	109335.4;206671.9;242492.2;100832.1;57226.5;94344.7;43712.9;199492.7;262039.3;224968.1;250178.2;172929.8;269380.9;137299.8;25597.8;20798.6;8405.7;37192.2;13399.8;87276;77736.8;40218.1;64979.5;30460.6;71621.8;91435.5;14762.7;34131.2;36129;33999.1;39403.4;21182.4;21146.6;38264.1	0.0007843406;0.0009285799;0.003501685;0.003081373;-0.004578738;-0.002504592;-0.003331374;0.003718502;0.008269292;0.007580697;0.006473606;0.005538705;0.008627663;0.010147;0.00766298;-0.008430957;-0.01461116;0.0115323;-0.00674696;0.00115699;0.0007534435;0.002117877;0.001573094;0.002023398;0.0008766034;0.005731193;0.002594191;0.00706419;-0.009187758;0.006821767;0.001257194;-0.004277606;0.003914999;0…	5.331587;3.568772;7.200836;5.374602;-7.105803;-3.101942;-3.527179;3.712928;7.262967;6.267144;4.894315;3.857671;4.933197;5.351888;3.559095;-3.665388;-11.19052;6.13767;-8.623147;5.027935;3.552266;5.615033;4.379805;4.004838;1.52115;10.26615;3.58639;10.01546;-13.00777;8.003182;1.506746;-5.120635;3.993091;9.222716	147.112019829973;260.195939571136;486.288723413828;573.321172135964;644.365946034454;807.427200427477;944.48693907205;1001.50135291901;1138.5557139911;1209.59351637437;1322.67868744648;1435.76368632752;1748.89921611532;1895.96611069574;2153.06976532235;2300.15427317591;1305.67322311127;1878.93817629019;782.424286465106;230.112375462072;212.102214322364;377.179828491091;359.169808588379;505.238500…	34	0.4857193	0.1888889
20140904-PurClathDigest-1ug-02	7836	4924	0	AGTFQAFEQFGQQLLAHGHYASPEIK	26	0	Unmodified	_AGTFQAFEQFGQQLLAHGHYASPEIK_					0	0	0	E1BFB0	4	HCD	FTMS	MULTI-MSMS	3	1	719.60951	2874.4089	0.59761	-3.768712	53.183	2.9593E-06	84.68	84.062	NaN	NaN	1	0	0	0	-1	0	0	0	0	y1;y2;y4;y5;y6;y7;y9;y10;y11;y12;y13;y16;y17;y5-H2O;y14(2+);y19(2+);b3;b3-H2O;b4;b4-H2O;b6;b6-H2O;b7;b7-H2O;b8;b8-H2O;b8-NH3	23102.4;36031.8;32363.3;13521.3;12286.4;9753.6;27835.5;38795.3;16502.6;42163.5;2412.6;38145.8;30008;2131.7;7268.4;2707.6;16029;12578.7;4128.7;13231;7917.4;16094.2;5140.1;14293.6;3674.3;7108;4114	0.001030899;0.001751352;0.002792651;0.003466206;-0.001576961;0.002653874;0.005452668;0.006505981;0.005044174;0.014942;-0.0119928;0.02052758;0.01410575;-0.004494402;0.0108221;-0.00343978;0.002018886;0.001097602;0.003443316;0.003046872;0.005879637;0.005869912;0.005429487;0.01156044;-0.002955505;0.001986207;0.002443846	7.007587;6.730918;5.742775;6.045841;-2.447318;3.286849;5.444504;5.714231;4.170131;11.29685;-8.352802;11.73751;7.439889;-8.093382;13.8318;-3.193718;8.77351;5.174881;9.129141;8.48313;10.20289;10.51463;7.506127;16.39025;-3.467309;2.380469;2.925501	147.111773272112;260.195116798902;486.289432448403;573.320787302953;644.362944258083;807.422041961083;1001.4996187529;1138.55747730267;1209.59605289704;1322.67021905066;1435.78121782878;1748.88731619422;1895.96215194769;555.318183224954;782.406717408191;1077.04579216477;230.111513566401;212.101870163878;377.178503052756;359.168334810176;576.271758030705;558.261203069345;723.340622096758;705.32392…	27	0.4026166	0.1849315
20140904-PurClathDigest-1ug-02	3698	1303	0	AHIAQLCEK	9	0	Unmodified	_AHIAQLCEK_					0	0	0	P49951;F1MPU0	2	HCD	FTMS	MULTI-MSMS	1	0	506.76585	1011.5172	-1.5931	-6.4290768	36.306	0.00028117	166.07	146.08	NaN	NaN	1	0	0	0	-1	0	0	0	0	y1;y2;y3;y4;y5;y6;y7;y8;y2-H2O;y3-NH3;y4-H2O;y5-H2O;y5-NH3;y6-H2O;y7-H2O;y7-NH3;y8(2+);a2;b2;b3;b4;b5;b6;b7	307263.8;151875.6;341636.3;254981.3;105173.5;685567.2;596572.6;18911.8;231228.5;9797.6;44065.4;48824.4;105463.1;39363.3;23645.5;20687.3;249808.9;651615.1;2246377;497867.4;104582.7;208827.1;95748;28789.2	0.0008539113;0.001434278;0.002388591;0.001431616;0.005088137;0.004001794;0.005190377;0.007593981;0.001189508;0.003729479;-0.002372062;0.001594707;0.001823356;0.003630861;-0.0007982828;0.0002196947;0.002007415;0.0008475571;0.001006168;0.001360705;0.002151829;0.002930782;0.006245783;-0.003623568	5.8045;5.19376;6.299656;2.908328;8.202675;5.788457;6.452296;8.066006;4.60793;10.29861;-5.001812;2.647718;3.022409;5.392393;-1.015086;0.2790123;4.259808;4.679855;4.811848;4.223352;5.472295;5.622279;9.845788;-4.914113	147.111950259271;276.153962989288;379.162193153166;492.247214108712;620.302135100012;691.34033523017;804.423210628033;941.479718885826;258.143643072592;362.134303164465;474.240453100473;602.295063842879;603.278850779247;673.330141477142;786.418634601114;787.401632208376;471.245287252194;181.10753993759;209.102295948406;322.186005392198;393.222328056179;521.2801266141;634.36087559424;737.379929422…	24	0.6484312	0.2580645
20140904-PurClathDigest-1ug-01	6789	3882	0	AHMGMFTELAILYSK	15	0	2 Oxidation (M)	_AHM(ox)GM(ox)FTELAILYSK_		AHM(1)GM(1)FTELAILYSK		AHM(129.77)GM(129.77)FTELAILYSK	0	0	2	P49951;F1MPU0	3	HCD	FTMS	MULTI-MSMS	6	1	581.953	1742.8372	-0.59017	-3.0944359	46.554	1.7665E-05	129.77	126.61	129.77	1	1	0	0	0	-1	0	0	0	0	y1;y2;y3;y4;y5;y6;y7;y8;y9;y2-H2O;y2-NH3;y3-H2O;y4-H2O;y5-H2O;y8-H2O;a2;b2;b3;b4;b5;b6;b7;b7-H2O;b8;b8-H2O;b9;b10;b10-H2O;b11;b8(2+)	652531.3;1913315;2792087;2354995;1714452;2394832;1159230;425071.4;97648.7;372216.7;37815.8;304826.9;142219.8;75312.6;198693.4;265201.8;1051804;445790.9;548449.8;2075835;897461.9;605686.2;1220066;1036788;808831.6;263679.3;253894.3;69626.3;37223.8;134751.7	0.0006091388;0.0008610759;0.001576763;0.001978517;0.002592985;0.002241722;0.002095956;0.003836032;0.0004228074;0.00107284;0.0001160063;0.002077965;0.001780377;-0.0002169037;0.00212087;0.0007892135;0.0007929391;0.001325412;0.001907653;0.003464831;0.003059245;0.004986987;0.004851923;0.001558415;0.003766953;0.005897917;0.006575169;-0.0001852793;0.020497;0.008101466	4.140641;3.677549;3.96963;3.877239;4.1596;3.228235;2.595626;4.095979;0.4074909;4.963792;0.5343002;5.47993;3.616595;-0.3583018;2.308989;4.357705;3.792107;3.721631;4.617245;6.185076;4.325483;6.169672;6.139372;1.66257;4.097455;5.614751;5.862997;-0.1679068;16.60296;17.26756	147.112195031775;234.143971504596;397.206584355636;510.290246581975;623.373696094343;694.411161145124;807.495370891412;936.536223911427;1037.58731561067;216.133195053965;217.118167472719;379.195518467602;492.279880036177;605.365941297027;918.52737438796;181.107598281187;209.102509177698;356.137375933209;413.158257415631;560.192099466301;707.260918968342;808.306669700324;790.296240078028;937.35269…	30	0.4823329	0.1435407
20140904-PurClathDigest-1ug-01	6848	3933	0	AHMGMFTELAILYSK	15	0	2 Oxidation (M)	_AHM(ox)GM(ox)FTELAILYSK_		AHM(1)GM(1)FTELAILYSK		AHM(63.21)GM(63.21)FTELAILYSK	0	0	2	P49951;F1MPU0	3	HCD	FTMS	MULTI-MSMS	1	0	581.953	1742.8372	-0.59017	-3.4387021	46.778	0.0053842	63.212	60.807	63.212	1	1	0	0	0	-1	0	0	0	0	y1;y2;y3;y4;y5;y6;y7;y8;y9;y2-H2O;y3-H2O;y4-H2O;a2;b2;b3;b4;b5;b6;b8;b8-H2O;b9;b7(2+)	4139840;1.344035E+07;1.613501E+07;1.475661E+07;9066966;1.347594E+07;5241411;1339124;517761.8;2653667;1722044;512371.4;1116773;6539119;1628231;3111182;1.016709E+07;4479774;5335510;447633.7;646597.2;1252003	0.0009864997;0.001356217;0.002847013;0.003796599;0.004978905;0.004870128;0.001568333;0.007507394;0.01597212;0.00191945;0.003713977;0.002144627;0.001638094;0.001290985;8.746071E-05;0.003032218;0.004232327;-0.003008145;0.0009205001;-0.005649853;0.001345111;0.002562755	6.705781;5.792248;7.16761;7.440104;7.987062;7.013348;1.942218;8.016159;15.39375;8.880903;9.794401;4.356522;9.044908;6.173947;0.2455805;7.339139;7.555146;-4.253196;0.9820204;-6.145491;1.280525;6.333154	147.111817670943;234.143476363322;397.205314106043;510.288428499778;623.371310174026;694.408532739229;807.495898515023;936.53255255048;1037.57176629543;216.132348443732;379.193882455539;492.27951578626;181.106749400799;209.102011132092;356.138613884392;413.157132851177;560.191331969691;707.266986358234;937.353329283391;919.349334949655;1050.43696865283;404.656903822434	22	0.5086595	0.2391304
20140904-PurClathDigest-1ug-01	6912	3989	0	AHMGMFTELAILYSK	15	0	2 Oxidation (M)	_AHM(ox)GM(ox)FTELAILYSK_		AHM(1)GM(1)FTELAILYSK		AHM(95.98)GM(95.98)FTELAILYSK	0	0	2	P49951;F1MPU0	3	HCD	FTMS	MULTI-MSMS	1	1	581.953	1742.8372	-0.59017	-3.4387021	47.019	0.00068637	95.981	93.576	95.981	1	1	0	0	0	-1	0	0	0	0	y1;y2;y3;y4;y5;y6;y7;y8;y2-H2O;b2;b3;b4;b5;b6;b7;b7-H2O;b8;b8-H2O;b9;b10;b7(2+)	470154;1160710;1584842;1174850;535373.6;985332.1;394635.6;242904.6;149368.7;464628.8;124170.5;222727.7;645359.2;273801.1;117680.4;189446.8;458194.1;84759.5;70305.5;134432.2;257664.2	0.0007433586;0.001381283;0.001794671;0.002819808;0.0002111569;0.002874709;0.005901781;0.002979388;0.0005799225;0.001180672;0.003449945;0.0007911089;0.004081178;0.006473069;-0.008880364;-0.002022207;0.001854499;0.004124388;0.01498082;0.01428093;-0.0007929675	5.05301;5.899303;4.518234;5.5259;0.3387312;4.139783;7.308784;3.181282;2.683166;5.64639;9.687177;1.914779;7.285326;9.15235;-10.98619;-2.558774;1.978443;4.486251;14.2617;12.73422;-1.959588	147.112060812;234.143451297238;397.206366447656;510.28940529108;623.376077922665;694.410528158304;807.491565066617;936.537080555646;216.133687971724;209.102121444703;356.135251399824;413.15937395974;560.19148311945;707.257505144442;808.320537051096;790.303114208535;937.352395285014;919.339560709054;1050.42333294546;1121.46114662213;404.660259544436	21	0.4890179	0.2258064
20140904-PurClathDigest-1ug-01	6792	3884	0	AHMGMFTELAILYSK	15	0	2 Oxidation (M)	_AHM(ox)GM(ox)FTELAILYSK_		AHM(1)GM(1)FTELAILYSK		AHM(139.66)GM(139.66)FTELAILYSK	0	0	2	P49951;F1MPU0	2	HCD	FTMS	MULTI-MSMS	1	1	872.42586	1742.8372	-1.593	-3.1653165	46.568	1.0543E-05	139.66	133.61	139.66	1	1	0	0	0	-1	0	0	0	0	y1;y2;y3;y4;y5;y6;y7;y8;y9;y10;y12;y13;y2-H2O;y2-NH3;y3-H2O;y4-H2O;a2;b2;b3;b4;b5;b6;b8;b8-H2O;b9;b9-H2O;b10;b10-H2O;b11;b12;b13;b8(2+);b11(2+)	2668517;8593169;7623027;5268463;2310798;1505069;631452.8;641487.8;902957.8;1221015;840472;603451.8;1763418;122480.8;542005.9;219018.3;3913670;1.457729E+07;2367766;376015.9;476725.9;501277.1;2328857;377661.1;3925160;424356.1;5957022;384899.6;1409199;407281.9;93898.6;610749.2;101009	0.0007550434;0.001158969;0.001967789;0.002795344;0.003434355;0.00188626;0.001020571;0.005953336;0.009028876;0.01601011;-0.006770099;0.02425517;0.001018798;0.001848693;0.0008550868;0.001123702;0.0009815086;0.001120786;0.001578865;0.003163893;0.00350546;0.004000123;0.005419092;0.0009641285;0.005428781;0.001096308;0.00563064;0.008114075;0.009760777;0.005062153;-0.002520017;0.008309705;0.007409022	5.132438;4.949819;4.954074;5.477959;5.509312;2.716344;1.26387;6.356774;8.701871;13.51475;-4.875064;15.79396;4.713749;8.514753;2.254995;2.282645;5.419484;5.359992;4.433306;7.657846;6.257603;5.655802;5.781297;1.048715;5.168137;1.061875;5.020769;7.353324;7.906345;3.756314;-1.668102;17.71141;11.99306	147.112049127201;234.143673611665;397.206193329808;510.289429754663;623.372854724282;694.411516607055;807.496446276934;936.534106608054;1037.57870954231;1184.64014222359;1388.719785385;1535.72415934142;216.133249096212;217.116434786129;379.19674134569;492.280536711286;181.107405986075;209.102181330904;356.137122480326;413.157001175838;560.192058837553;707.259978090558;937.348830691334;919.3427209…	33	0.5063527	0.1918605
20140904-PurClathDigest-1ug-01	6856	3940	0	AHMGMFTELAILYSK	15	0	2 Oxidation (M)	_AHM(ox)GM(ox)FTELAILYSK_		AHM(1)GM(1)FTELAILYSK		AHM(125.22)GM(125.22)FTELAILYSK	0	0	2	P49951;F1MPU0	2	HCD	FTMS	MULTI-MSMS	1	0	872.42586	1742.8372	-1.593	-4.4276261	46.808	2.2863E-05	125.22	121.71	125.22	1	1	0	0	0	-1	0	0	0	0	y1;y2;y3;y4;y5;y6;y7;y8;y9;y10;y12;y2-H2O;y3-H2O;a2;b2;b3;b4;b5;b6;b8;b9;b10;b11;b11-H2O;b8(2+);b9(2+);b10(2+)	5768740;1.607118E+07;1.156247E+07;8982429;2713493;3516370;1332097;1293279;1484112;1560795;652348.8;2754588;610303.8;8478734;2.68114E+07;4149282;678063.6;1059046;978144.6;3802083;2699562;9165796;2764094;506605.6;2748694;3279094;1781162	0.000922201;0.001310991;0.002159955;0.003496799;0.007566892;0.003500946;0.001527506;0.003512652;0.004539579;0.01182541;0.02374469;0.001639597;0.00239941;0.0009176746;0.001232086;0.0015347;0.004787094;0.006029522;0.01301979;0.006901972;0.003759881;0.005687371;0.01314258;0.02086316;0.003277644;0.001607688;8.525626E-05	6.268705;5.599093;5.437872;6.85259;12.13871;5.041613;1.891658;3.750684;4.375147;9.982241;17.09864;7.586068;6.327639;5.067017;5.892271;4.309296;11.58667;10.76336;18.40901;7.363302;3.579358;5.071355;10.64567;17.14975;6.985935;3.058063;0.1519066	147.111881969609;234.143521589063;397.206001163398;510.288728300022;623.368722187306;694.409901921539;807.495939341947;936.536547291668;1037.58319883882;1184.6443269295;1388.68927059194;216.132628297451;379.195197022422;181.107469820113;209.102070030829;356.137166644844;413.155377974372;560.189534774836;707.250958422607;937.347347811609;1050.43455388295;1121.46974018034;1234.5463489529;1216.52806…	27	0.5334049	0.2045455
20140904-PurClathDigest-1ug-01	6922	3998	0	AHMGMFTELAILYSK	15	0	2 Oxidation (M)	_AHM(ox)GM(ox)FTELAILYSK_		AHM(1)GM(1)FTELAILYSK		AHM(110.55)GM(110.55)FTELAILYSK	0	0	2	P49951;F1MPU0	2	HCD	FTMS	MULTI-MSMS	3	0	872.42586	1742.8372	-1.593	-6.1489573	47.054	0.00016408	110.55	107.1	110.55	1	1	0	0	0	-1	0	0	0	0	y1;y2;y3;y4;y5;y6;y7;y8;y9;y10;y2-H2O;y3-H2O;a2;b2;b3;b4;b5;b6;b8;b8-H2O;b9;b10;b11;b12;b8(2+);b9(2+);b10(2+)	271179.2;928115.2;757207.6;608231.9;259411.2;228773.4;76591.1;110306.6;94047.2;77761.3;180469.4;52726.2;527786;1754024;312343.8;67457.2;55803.9;39167.9;287859.7;27516.9;251600.2;568302.6;176017.8;44603.6;68707.6;198919;91156.9	0.0007916291;0.001151534;0.002494348;0.002286281;0.0047043;0.005475359;0.005918215;0.002350348;-0.002750093;0.005779915;0.001667299;3.405147E-05;0.001045496;0.001190769;0.002585696;0.006609332;0.002999354;0.0006290861;0.003667896;0.01448147;0.005018641;0.008949539;0.003134823;-0.0001492428;0.001194815;-3.814858E-05;0.006275846	5.381132;4.918067;6.27974;4.480358;7.546543;7.884932;7.329135;2.509614;-2.650461;4.879005;7.714239;0.08979876;5.772799;5.694679;7.260415;15.99728;5.354148;0.8894652;3.913046;15.75221;4.777686;7.980211;2.53923;-0.1107435;2.546605;-0.07256405;11.18221	147.112012541518;234.143681046282;397.205666770338;510.289938817742;623.371584779169;694.407927508518;807.491548633038;936.537709595736;1037.59048851156;1184.65037241941;216.132600595578;379.197562381029;181.107341998346;209.102111347477;356.136115649097;413.153555736882;560.192564943169;707.26334912711;937.350581887221;919.329203625991;1050.43329512293;1121.46647801294;1234.55635670949;1347.6437…	27	0.5150037	0.1875
20140904-PurClathDigest-1ug-01	6977	4046	0	AHMGMFTELAILYSK	15	0	2 Oxidation (M)	_AHM(ox)GM(ox)FTELAILYSK_		AHM(1)GM(1)FTELAILYSK		AHM(88.22)GM(88.22)FTELAILYSK	0	0	2	P49951;F1MPU0	3	HCD	FTMS	MULTI-MSMS	2	0	581.953	1742.8372	0.036921	-3.6108353	47.272	0.002539	88.224	84.92	88.224	1	1	0	0	0	-1	0	0	0	0	y1;y2;y3;y4;y5;y6;y7;y8;y2-H2O;y3-H2O;y4-H2O;y8-H2O;b2;b4;b5;b6;b7;b7-H2O;b8;b8-H2O;b7(2+);b8(2+)	115836.6;285345.7;337547.8;260449.4;174950.2;278482.8;115198.3;64676.2;53412.5;41216.5;15338.3;14221.5;146321.7;70417.7;159497.6;93800.8;19414.2;61652.2;114393.7;26815.9;34680.4;21414.3	0.0008479512;0.001319178;0.002374169;0.003617738;0.003431109;0.006259103;0.00448673;-0.002663665;-0.0003946352;0.005850328;0.002476257;-0.002408071;0.001274851;0.002550345;0.002463622;0.004923251;0.002411098;0.006568614;0.0028034;2.691363E-05;0.005142251;0.004524396	5.763985;5.634059;5.977176;7.089592;5.504104;9.013592;5.556371;-2.844146;-1.825877;15.42842;5.030189;-2.621652;6.096789;6.172813;4.397808;6.96103;2.982891;8.311603;2.990767;0.02927483;12.70776;9.643275	147.111956219441;234.143513402103;397.205786949868;510.288607361306;623.372857970574;694.407143764683;807.492980117353;936.542723608501;216.134662529419;379.19174610481;492.279184155611;918.531903328758;209.102027265934;413.157614723738;560.193100675329;707.25905496182;808.309245589284;790.29452338715;937.351446383584;919.343658183567;404.654324325817;469.176238729425	22	0.505425	0.2391304
20140904-PurClathDigest-1ug-01	7040	4101	0	AHMGMFTELAILYSK	15	0	2 Oxidation (M)	_AHM(ox)GM(ox)FTELAILYSK_		AHM(1)GM(1)FTELAILYSK		AHM(49.19)GM(49.19)FTELAILYSK	0	0	2	P49951;F1MPU0	3	HCD	FTMS	MULTI-MSMS	1	1	581.953	1742.8372	0.036921	-3.7829684	47.514	0.02759	49.188	46.885	49.188	1	1	0	0	0	-1	0	0	0	0	y1;y2;y3;y4;y5;y6;y7;y8;y2-H2O;y3-H2O;b2;b3;b4;b5;b6;b8;b9;b7(2+)	190767.9;662872.5;864476.5;678337.8;424209.4;607338.3;266328.4;135916;101876;86768.4;321213.4;119758.8;95482.3;509784.2;163211.8;230911;48214.8;77715.7	0.0003687277;0.001434956;0.002091618;0.002464713;0.003428779;0.004001123;0.006869152;0.005784523;0.002448766;0.003874088;0.0007531701;0.003730377;0.003280923;0.003398296;0.0005564131;0.009804611;0.008779076;0.0008985996	2.506435;6.128533;5.265827;4.830026;5.500366;5.761908;8.506789;6.17652;11.32997;10.21665;3.601918;10.47462;7.941108;6.066305;0.7867126;10.45999;8.357606;2.220636	147.112435442847;234.143397624917;397.206069500362;510.289760386689;623.372860300915;694.40940174455;807.49059769579;936.534275420985;216.131819127657;379.193722344276;209.102548946674;356.134970968149;413.156884145231;560.192166000626;707.263421800107;937.344445172245;1050.42953468761;404.658567977382	18	0.4647947	0.2117647
20140904-PurClathDigest-1ug-01	7105	4158	0	AHMGMFTELAILYSK	15	0	2 Oxidation (M)	_AHM(ox)GM(ox)FTELAILYSK_		AHM(1)GM(1)FTELAILYSK		AHM(69.26)GM(69.26)FTELAILYSK	0	0	2	P49951;F1MPU0	3	HCD	FTMS	MULTI-MSMS	2	0	581.953	1742.8372	0.036921	-2.2337703	47.757	0.0035065	69.258	64.732	69.258	1	1	0	0	0	-1	0	0	0	0	y1;y2;y3;y4;y5;y6;y7;y8;y2-H2O;y3-H2O;b2;b3;b4;b5;b6;b7;b7-H2O;b8;b7(2+);b8(2+)	187193.7;529322.9;634078.8;447138.5;226944.1;451073;187607.7;102585;148992.4;60005.6;326619.8;55071.6;126999.1;309911.5;196782.6;35573.4;117176.1;160736.7;64885.5;35040.9	0.001451162;0.00148646;0.002278476;0.002059897;0.002174682;0.003374596;-0.002328419;0.009208698;0.001423322;0.001877279;0.0009599144;0.001707831;0.003434187;0.003813753;0.005287636;0.007889898;0.004838873;0.01117501;-0.0009532507;0.009363899	9.864381;6.348505;5.736259;4.036717;3.488566;4.859659;-2.883492;9.832776;6.585406;4.950685;4.590644;4.795434;8.312068;6.807942;7.476241;9.761055;6.12286;11.922;-2.35568;19.95838	147.111353008221;234.143346120343;397.205882643207;510.290165202071;623.374114398027;694.410028271615;807.499795266678;936.530851245845;216.132844571688;379.195719153999;209.102342202397;356.136993513874;413.156730881832;560.191750543754;707.258690576949;808.303766790012;790.296253127903;937.343074776973;404.660419827624;469.171399225811	20	0.4886159	0.2272727
20140904-PurClathDigest-1ug-01	6987	4055	0	AHMGMFTELAILYSK	15	0	2 Oxidation (M)	_AHM(ox)GM(ox)FTELAILYSK_		AHM(1)GM(1)FTELAILYSK		AHM(130.47)GM(130.47)FTELAILYSK	0	0	2	P49951;F1MPU0	2	HCD	FTMS	MULTI-MSMS	4	1	872.42586	1742.8372	-0.54219	-4.4276261	47.311	1.8384E-05	130.47	128.77	130.47	1	1	0	0	0	-1	0	0	0	0	y1;y2;y3;y4;y5;y6;y7;y8;y9;y10;y12;y13;y2-H2O;y3-H2O;y4-H2O;y14(2+);a2;b2;b3;b4;b6;b8;b8-H2O;b9;b10;b10-H2O;b11;b12;b7(2+);b8(2+);b10(2+)	306491.4;892705.3;772488.2;573806.8;183670.4;149662.3;46634.3;79729.3;58387.2;80885.5;54736.6;84984.6;145485.1;52470.1;28458.4;27626.4;435980.1;1465244;226988.9;62828.1;46736.8;184366.3;47546;483904.2;502830.1;16455.5;228242.9;60115.7;29720.7;81043.3;114725.9	0.0007080544;0.001158046;0.002061031;0.002624515;0.002699608;0.004897085;0.009648848;0.004343465;0.01167879;0.01613067;0.01699358;0.009815392;0.001038225;0.001598257;-0.00151497;0.007307638;0.0007998763;0.00105088;0.002219869;0.002720981;-0.005028462;0.004622613;0.003088551;0.006841868;0.006930619;-0.009317449;0.007928064;0.009040846;0.002231381;0.005267568;0.001367594	4.813026;4.945877;5.18882;5.143188;4.330643;7.052168;11.94922;4.637799;11.25584;13.61652;12.23707;6.391317;4.803637;4.214856;-3.077437;8.731794;4.416581;5.025675;6.233196;6.585822;-7.109688;4.931578;3.359528;6.513388;6.179949;-8.44374;6.421817;6.708678;5.51425;11.22729;2.436737	147.112096116221;234.143674534704;397.206100088002;510.289600583891;623.373589471318;694.408505781974;807.48781799991;936.535716479277;1037.5760596326;1184.64002166394;1388.69602170919;1535.73859912228;216.133229668753;379.195998176002;492.283175383204;836.899993783249;181.107587618404;209.102251236739;356.136481476585;413.157444087378;707.269006675078;937.34962717102;919.340596546598;1050.431471…	31	0.5194327	0.2026144
20140904-PurClathDigest-1ug-01	7051	4111	0	AHMGMFTELAILYSK	15	0	2 Oxidation (M)	_AHM(ox)GM(ox)FTELAILYSK_		AHM(1)GM(1)FTELAILYSK		AHM(108.06)GM(108.06)FTELAILYSK	0	0	2	P49951;F1MPU0	2	HCD	FTMS	MULTI-MSMS	4	1	872.42586	1742.8372	-0.54219	-3.9686044	47.553	0.00031681	108.06	104.56	108.06	1	1	0	0	0	-1	0	0	0	0	y1;y2;y3;y4;y5;y6;y7;y8;y9;y10;y13;y14;y2-H2O;y3-H2O;y4-H2O;a2;b2;b3;b4;b5;b6;b7;b8;b8-H2O;b9;b10;b11	391468.3;1025738;947939.6;710599.4;253525.2;198568.7;70071.3;74977.2;68083.2;102268.2;34490;69562.6;229592;48051.6;28688;533396.1;2040362;309550.6;99293.8;73764.4;44563.7;51658.5;485595.2;39240.8;233774.2;813798.8;265097.1	0.0007119348;0.001564751;0.002420551;0.002551884;0.004456821;0.004305372;0.001978619;0.0136643;0.0001984149;0.005747939;0.0175056;0.02860515;0.001330136;0.001396395;0.0001968707;0.001268028;0.001287747;0.002506672;0.001590026;0.001068303;0.0095535;0.01570322;0.004786878;0.0124443;0.00509236;0.009125757;0.005141378	4.839403;6.682877;6.093947;5.000854;7.149539;6.200051;2.450315;14.59041;0.1912271;4.852013;11.39887;17.10038;6.154249;3.682513;0.399915;7.001536;6.158465;7.038521;3.848465;1.907021;13.50787;19.42756;5.106823;13.53625;4.847867;8.137344;4.164562	147.112092235845;234.143267829822;397.205740568202;510.289673215263;623.371832258624;694.409097495931;807.495488229279;936.526395642479;1037.58754000322;1184.65040439536;1535.73090891813;1672.77872122511;216.132937758219;379.196200037421;492.281463542164;181.107119466703;209.102014369387;356.13619467289;413.158575042488;560.194495994253;707.254424712659;808.295953471913;937.34946290507;919.331240…	27	0.521093	0.2125984
20140904-PurClathDigest-1ug-01	7114	4166	0	AHMGMFTELAILYSK	15	0	2 Oxidation (M)	_AHM(ox)GM(ox)FTELAILYSK_		AHM(1)GM(1)FTELAILYSK		AHM(118.52)GM(118.52)FTELAILYSK	0	0	2	P49951;F1MPU0	2	HCD	FTMS	MULTI-MSMS	3	1	872.42586	1742.8372	-0.54219	-3.0505611	47.789	0.00017602	118.52	116.82	118.52	1	1	0	0	0	-1	0	0	0	0	y1;y2;y3;y4;y5;y6;y8;y10;y12;y2-H2O;y3-H2O;a2;b2;b3;b4;b5;b6;b8;b9;b10;b11;b12;b10(2+)	350959.7;1114644;892656.3;648408;237553.8;133949.8;106271.2;67205.3;54342.4;211130.7;86197;489356.4;1848837;311520;99594.4;82051.8;65229.4;359249.4;419842.6;731571.5;323949.4;26878.8;102383.6	0.0006596101;0.001182167;0.001886662;0.003286756;0.001476575;0.001306611;-0.00248312;0.02091105;-0.00312638;0.0016686;0.001527999;0.0008941648;0.001063267;0.002391022;0.001559182;0.003756592;0.01032014;0.009162882;0.003381575;0.01051098;0.00896756;0.01749437;0.003532996	4.483723;5.048898;4.749829;6.44097;2.36868;1.881607;-2.65137;17.65189;-2.251274;7.720261;4.029576;4.937205;5.084912;6.713783;3.77381;6.705903;14.59185;9.775356;3.219214;9.372542;7.263826;12.98162;6.295007	147.112144560428;234.143650413137;397.206274457105;510.288938343367;623.374812504208;694.412096256621;936.542543064405;1184.63524128292;1388.71614166677;216.132599294198;379.196068433229;181.107493329929;209.102238850307;356.136310323149;413.158605886726;560.19180770543;707.253658076403;937.345086901565;1050.43493218935;1121.46491657395;1234.55052397218;1347.62606114238;561.23781901302	23	0.5243187	0.1742424
20140904-PurClathDigest-1ug-01	7244	4280	0	AHMGMFTELAILYSK	15	0	2 Oxidation (M)	_AHM(ox)GM(ox)FTELAILYSK_		AHM(1)GM(1)FTELAILYSK		AHM(107.11)GM(107.11)FTELAILYSK	0	0	2	P49951;F1MPU0	2	HCD	FTMS	MULTI-MSMS	5	1	872.42586	1742.8372	-0.54219	-7.0670006	48.275	0.00013561	107.11	104.66	107.11	1	1	0	0	0	-1	0	0	0	0	y1;y2;y3;y4;y5;y6;y7;y8;y9;y12;y2-H2O;y3-H2O;y14(2+);a2;b2;b3;b4;b5;b6;b7;b7-H2O;b8;b9;b10;b10-H2O;b7(2+);b8(2+);b10(2+)	128181.5;286447.9;282797.5;186219.1;79726.2;44166.2;10876.8;20542.9;39217;18852.3;66926.6;24815.2;10124.8;152453;539557.6;77135.5;16292.6;15038.8;11581.8;19277.7;12227.6;76166.4;119765;189249.2;38600.1;7775.8;33915.1;49829.9	0.0008419291;0.001382649;0.00189156;0.002627919;0.005935594;0.009484929;0.01135084;0.005605011;0.008189503;-0.01523004;0.001717795;0.002019233;0.002622101;0.0009387049;0.00114913;0.00284329;0.001852056;0.001939229;0.007361716;-0.007559085;0.007430049;0.003794503;0.004833241;0.01255797;-0.001042262;-0.005653685;0.00485453;0.006483596	5.72305;5.905135;4.76216;5.149859;9.521778;13.65909;14.057;5.984842;7.892892;-10.9669;7.947876;5.325045;3.133095;5.183138;5.495543;7.983722;4.482677;3.461712;10.40883;-9.351609;9.40163;4.048116;4.601187;11.19785;-0.9445346;-13.97127;10.34693;11.55238	147.111962241542;234.143449931958;397.206269559057;510.2895971797;623.370353485608;694.403917938519;807.486116011618;936.534454933399;1037.57954891538;1388.7282453242;216.132550099545;379.195577199082;836.904679320186;181.107448789736;209.102152986941;356.135858055487;413.15831301312;560.193625068071;707.256616497088;808.31921577275;790.293661951688;937.350455280467;1050.43348052277;1121.46286957…	28	0.5150765	0.224
20140904-PurClathDigest-1ug-01	7238	4275	0	AHMGMFTELAILYSK	15	0	2 Oxidation (M)	_AHM(ox)GM(ox)FTELAILYSK_		AHM(1)GM(1)FTELAILYSK		AHM(68.97)GM(68.97)FTELAILYSK	0	0	2	P49951;F1MPU0	3	HCD	FTMS	MULTI-MSMS	7	0	581.953	1742.8372	0.00038739	-1.8895041	48.252	0.0075354	68.972	66.669	68.972	1	1	0	0	0	-1	0	0	0	0	y1;y2;y3;y4;y5;y6;y7;y8;y2-H2O;y3-H2O;a2;b2;b3;b4;b5;b6;b8;b8-H2O;b7(2+)	64393;159946.3;180279;140420.7;57798.5;125479.8;35778.2;19545.9;21760.8;13976.6;31685.5;72071.3;41566.1;44410.7;93621.4;44712.3;74254.1;10949.7;12821.7	0.0004002885;0.001432138;0.001798452;0.00495138;0.00485781;0.003420224;0.003583503;0.0001350981;0.0005659452;0.002938782;0.001610177;0.001236649;0.002498232;0.003727628;0.004421867;0.004794773;0.007543688;0.01600023;0.003857081	2.72097;6.116499;4.527751;9.703123;7.792802;4.925367;4.437809;0.1442523;2.618496;7.750062;8.890759;5.914091;7.014822;9.022315;7.893497;6.779372;8.047916;17.40427;9.531761	147.112403882114;234.143400442579;397.206362666986;510.28727371887;623.371431269514;694.409982643422;807.493883344319;936.53992484592;216.133701948992;379.194657650119;181.106777318008;209.102065468117;356.136203113255;413.156437441015;560.191142429428;707.259183439897;937.346706095552;919.327684866891;404.655609496311	19	0.4466876	0.2087912
20140904-PurClathDigest-1ug-01	7306	4334	0	AHMGMFTELAILYSK	15	0	2 Oxidation (M)	_AHM(ox)GM(ox)FTELAILYSK_		AHM(1)GM(1)FTELAILYSK		AHM(46.32)GM(46.32)FTELAILYSK	0	0	2	P49951;F1MPU0	3	HCD	FTMS	MULTI-MSMS	3	0	581.953	1742.8372	0.00038739	-5.8485658	48.513	0.034036	46.318	44.701	46.318	1	1	0	0	0	-1	0	0	0	0	y1;y2;y3;y4;y5;y6;y7;y2-H2O;a2;b2;b3;b4;b5;b6;b8;b7(2+)	28291.2;145303.8;139428.2;123083.2;54655.3;113684.8;44029.5;13963.2;15010.8;66257.4;10189;25033.6;72864.5;32869.6;45065.4;17634.8	0.001177897;0.001774229;0.002065517;0.003126662;0.001911316;0.004724522;0.00551793;0.0005213374;0.0007678584;0.001126766;0.001176126;0.001783359;0.003502545;0.01175571;0.01050113;0.007493278	8.006827;7.577542;5.200114;6.127235;3.06608;6.803662;6.833418;2.412106;4.239791;5.388591;3.30245;4.316406;6.2524;16.62166;11.20307;18.51783	147.111626273302;234.143058351589;397.20609560178;510.289098437699;623.374377763632;694.408678345525;807.491948917639;216.133746556768;181.107619636315;209.102175350567;356.137525218684;413.158381709343;560.192061751783;707.252222505647;937.343748655789;404.651973299005	16	0.439077	0.1777778
20140904-PurClathDigest-1ug-01	7374	4394	0	AHMGMFTELAILYSK	15	0	2 Oxidation (M)	_AHM(ox)GM(ox)FTELAILYSK_		AHM(1)GM(1)FTELAILYSK		AHM(84.75)GM(84.75)FTELAILYSK	0	0	2	P49951;F1MPU0	3	HCD	FTMS	MULTI-MSMS	7	1	581.953	1742.8372	0.00038739	-4.4715009	48.768	0.003368	84.753	83.137	84.753	1	1	0	0	0	-1	0	0	0	0	y1;y2;y3;y4;y5;y6;y7;y8;y2-H2O;y3-H2O;y8-H2O;a2;b2;b3;b4;b5;b6;b7;b7-H2O;b8;b8-H2O;b10	76909.6;196784.7;247182;196907;120333.9;184443.5;67459.5;24594.3;18274;19655.8;12650.8;11861.6;114827.2;31372.8;38559.3;122303.1;61575;35231.8;95336;77888.1;10684.2;12515.5	0.0008607106;0.001302476;0.002153759;0.002451432;0.002031937;0.001996367;0.003441837;0.006351469;0.001157283;0.004137131;8.456345E-06;0.000350051;0.00100287;0.002614739;0.003755543;0.003788973;0.00389618;0.002789792;0.003529095;0.0058546;0.01322999;0.009689688	5.850718;5.562725;5.422271;4.803999;3.259578;2.874905;4.262368;6.78189;5.35449;10.91034;0.009206395;1.93283;4.796072;7.341965;9.089883;6.763707;5.508836;3.451394;4.465527;6.245916;14.39089;8.6402	147.111943460028;234.143530104625;397.206007360145;510.289773667607;623.374257142487;694.411406500477;807.494025010872;936.533708475477;216.133110611674;379.19345930138;918.529486801354;181.108037443663;209.102299247195;356.136086606486;413.156409525314;560.191775324329;707.260082033398;808.308866894969;790.29756290568;937.348395183656;919.330455110217;1121.46573786434	22	0.3471584	0.1913043
20140904-PurClathDigest-1ug-01	7493	4498	0	AHMGMFTELAILYSK	15	0	2 Oxidation (M)	_AHM(ox)GM(ox)FTELAILYSK_		AHM(1)GM(1)FTELAILYSK		AHM(80.75)GM(80.75)FTELAILYSK	0	0	2	P49951;F1MPU0	3	HCD	FTMS	MULTI-MSMS	6	1	581.953	1742.8372	0.00038739	-4.8157671	49.217	0.004325	80.746	78.444	80.746	1	1	0	0	0	-1	0	0	0	0	y1;y2;y3;y4;y5;y6;y7;y8;y2-H2O;y8-H2O;a2;b2;b3;b4;b5;b6;b7;b7-H2O;b8;b8-H2O;b7(2+);b8(2+)	41057;127122.1;140120.8;92604.9;62230.5;100152.4;45259.5;16559.4;13200.9;5765.3;6302.5;53473.1;10454.3;31557.5;54682;21769.7;8440.8;30980.7;40484.5;11990.1;11513.4;6502.2	0.0006991581;0.001249872;0.001597338;0.00281607;0.00242314;0.002674721;0.008113674;0.008089676;0.001064671;0.01032601;0.0008784424;0.001191285;0.001887751;0.004637421;0.004088352;0.002674339;0.002499044;0.008420615;0.006874064;-0.001499738;0.001876091;0.008115351	4.752553;5.338057;4.02143;5.518575;3.887138;3.851785;10.04803;8.637907;4.925994;11.24202;4.850392;5.697143;5.300633;11.2244;7.298133;3.78126;3.091694;10.65506;7.333529;-1.631311;4.636244;17.29715	147.112105012495;234.143582708868;397.206563780527;510.289409028772;623.373865939058;694.410728146295;807.489353173979;936.531970267384;216.133203223321;918.519169249272;181.107509052301;209.10211083227;356.136813594474;413.155527647751;560.191475945162;707.261303874348;808.309157642963;790.292671386689;937.347375719063;919.345184834864;404.657590485619;469.172647773915	22	0.5044347	0.2391304
20140904-PurClathDigest-1ug-01	10077	6759	0	AHMGMFTELAILYSK	15	0	2 Oxidation (M)	_AHM(ox)GM(ox)FTELAILYSK_		AHM(1)GM(1)FTELAILYSK		AHM(101.75)GM(101.75)FTELAILYSK	0	0	2	P49951;F1MPU0	2	HCD	FTMS	MULTI-MSMS	6	0	872.42586	1742.8372	1.0356	0.16259046	61.514	0.00027222	101.75	98.376	101.75	1	1	0	0	0	-1	0	0	0	0	y1;y2;y3;y4;y5;y6;y7;y8;y9;y12;y2-H2O;a2;b2;b3;b5;b8;b8-H2O;b9;b10;b11;b12;b8(2+);b9(2+);b10(2+)	7708.1;21933.9;16924.3;10921;3674.9;2471.6;1469;2815.2;2153.5;2267.9;2864.6;10654.9;37376.5;4233.6;1940.3;4958.2;1223.4;5537.7;11851.3;4386;1199.3;2099.5;5200;3998.7	0.0007827439;0.001330802;0.002562131;0.002485542;0.004780036;0.008093867;0.01095383;-0.0001931148;0.01330086;0.02333178;0.0019397;0.0009179661;0.001171483;0.001645342;0.003887368;0.004543437;-0.00320748;0.0121571;0.002569213;0.001049238;0.009059031;0.005564646;0.003028293;0.005391422	5.320734;5.683703;6.450391;4.870845;7.668037;11.65583;13.56534;-0.2062003;12.81919;16.80129;8.974594;5.068626;5.602443;4.619968;6.939353;4.847109;-3.488868;11.57349;2.290928;0.8498893;6.722172;11.86049;5.76028;9.606337	147.112021426764;234.143501778415;397.205598987541;510.289739557164;623.371509043727;694.405308999847;807.486513017442;936.540253058841;1037.57443755419;1388.68968350223;216.132328194219;181.107469528581;209.10213063402;356.137056003155;560.191676928893;937.34970634662;919.346892577259;1050.42615666673;1121.47285833843;1234.55844229404;1347.63449648238;469.175198479121;525.71976682227;561.2359605…	24	0.514394	0.2264151
20140904-PurClathDigest-1ug-01	7180	4224	0	AHMGMFTELAILYSK	15	0	2 Oxidation (M)	_AHM(ox)GM(ox)FTELAILYSK_		AHM(1)GM(1)FTELAILYSK		AHM(125.36)GM(125.36)FTELAILYSK	0	0	2	P49951;F1MPU0	2	HCD	FTMS	MSMS	5	0	872.42586	1742.8372	NaN	-5.5751802	48.032	3.0563E-07	125.36	121.98	125.36	1	1	0	0	0	-1	0	0	0	0	y1;y2;y3;y4;y5;y6;y7;y8;y9;y10;y12;y13;y2-H2O;y3-H2O;y4-H2O;a2;b2;b3;b4;b5;b6;b8;b8-H2O;b9;b10;b11;b12;b8(2+);b9(2+);b10(2+)	79384.5;222349.7;188606.2;130085.9;48995.4;42647.8;14727.3;24863.2;12607.4;19324.2;19378.8;7659.1;44120.8;16734;8961.3;120377.7;401240.3;56241.6;12482.9;12728.3;10148.2;63750.9;6164.8;48807.6;129661;48921.1;11668.9;33658.9;53952;50026.3	0.000810764;0.001190402;0.001839656;0.003459437;0.002872434;0.001697462;0.008719543;-0.00143981;0.003504232;-0.002699552;0.02097699;-0.01900923;0.001210866;0.001384762;0.0002775683;0.0007746387;0.001054315;0.002210792;0.005081707;0.002546454;0.007593105;0.006358603;0.01151197;0.005745551;0.006693337;0.01098575;0.01058696;0.003130669;0.001475584;0.001706853	5.511202;5.084068;4.631488;6.77937;4.607887;2.44446;10.79835;-1.537369;3.377299;-2.278759;15.10557;-12.37768;5.60241;3.651836;0.5638408;4.277229;5.0421;6.20771;12.29976;4.545672;10.736;6.783611;12.5221;5.4697;5.968367;8.898597;7.855968;6.672673;2.80678;3.04122	147.111993406637;234.143642178141;397.206321462355;510.288765662517;623.373416645095;694.411705405823;807.488747304903;936.541499754271;1037.58423418631;1184.6588518859;1388.69203829739;1535.76742374778;216.133057028259;379.196211670178;492.28138284457;181.107612856028;209.102247802223;356.136490552833;413.155083362222;560.193017842855;707.256385108146;937.347891180094;919.332173130405;1050.43256…	30	0.5145539	0.2097902
20140904-PurClathDigest-1ug-01	7373	4393	0	AHMGMFTELAILYSK	15	0	2 Oxidation (M)	_AHM(ox)GM(ox)FTELAILYSK_		AHM(1)GM(1)FTELAILYSK		AHM(122.63)GM(122.63)FTELAILYSK	0	0	2	P49951;F1MPU0	2	HCD	FTMS	MSMS	6	0	872.42586	1742.8372	NaN	-5.5751802	48.765	3.8766E-07	122.63	119.37	122.63	1	1	0	0	0	-1	0	0	0	0	y1;y2;y3;y4;y5;y6;y7;y8;y9;y10;y12;y13;y2-H2O;y3-H2O;a2;b2;b3;b4;b5;b6;b8;b9;b10;b10-H2O;b11;b12;b8(2+);b9(2+);b10(2+)	87729.3;205121.7;173637.5;145545.4;53031.7;48649.3;20994.2;24524.9;24779.3;17515.9;12553.6;4856.2;32951.2;13995.4;127960.1;380180.9;50409.4;16278.6;20951.4;10596.2;60288.3;46262.7;109221.4;9643.2;42866.4;12271;36705.8;58055.3;30570.4	0.0008939078;0.001359809;0.002001221;0.003101727;0.002199176;0.004127108;0.0007026776;0.0004190858;0.01571597;-0.003869173;0.0261039;0.02255248;0.0009479439;0.002422716;0.001088037;0.001233588;0.002070504;0.001937935;0.004116365;0.005536544;0.008160965;0.01212346;0.004558088;-0.008940736;0.005888506;-0.007244702;0.00194736;0.005163612;0.004536552	6.076379;5.80759;5.038243;6.078372;3.527859;5.943337;0.8701925;0.4474832;15.14687;-3.266062;18.79754;14.68522;4.385922;6.389099;6.007694;5.899453;5.813791;4.690539;7.348139;7.828176;8.706458;11.54147;4.064384;-8.102354;4.769745;-5.375801;4.15057;9.822025;8.083133	147.111910262819;234.143472771334;397.20615989775;510.289123372083;623.374089903457;694.409275758813;807.496764170183;936.539640858255;1037.57202245046;1184.66002150691;1388.68691138408;1535.72586203905;216.133319950232;379.195173717022;181.107299457501;209.102068528897;356.13663084103;413.158227134008;560.19144793234;707.258441669651;937.346088818809;1050.42619030463;1121.47086946336;1103.473803…	29	0.4594237	0.1768293
20140904-PurClathDigest-1ug-01	7501	4505	0	AHMGMFTELAILYSK	15	0	2 Oxidation (M)	_AHM(ox)GM(ox)FTELAILYSK_		AHM(1)GM(1)FTELAILYSK		AHM(123.76)GM(123.76)FTELAILYSK	0	0	2	P49951;F1MPU0	2	HCD	FTMS	MSMS	6	0	872.42586	1742.8372	NaN	-3.280072	49.248	3.5369E-07	123.76	120.38	123.76	1	1	0	0	0	-1	0	0	0	0	y1;y2;y3;y4;y5;y6;y7;y8;y9;y10;y12;y2-H2O;y3-H2O;a2;b2;b3;b4;b5;b6;b8;b9;b10;b11;b12;b7(2+);b8(2+);b9(2+);b10(2+)	44830.8;92385.6;80157.3;57535.7;23729.8;19474.3;10651.8;9271;11679.8;6909.7;7131.5;19133.7;7027.7;49980.9;174317;22593.3;7418.3;4740.3;3113.2;30421.2;18580.7;60181.2;19260.8;5674.6;2808.3;13495.3;31059.6;15211.3	0.0008068598;0.001243626;0.002344313;0.002997837;0.004412128;0.001303236;0.01246364;-0.00465632;0.00354281;-0.003735299;0.01069872;0.001470987;0.004183527;0.0008772702;0.001139487;0.001995581;0.002618874;-0.0004003574;0.01133659;0.002256278;0.009552733;0.009147656;0.0006454309;0.005083528;0.006149784;0.00602988;0.003601379;0.004996515	5.484663;5.311381;5.902011;5.874781;7.077842;1.876748;15.43513;-4.971807;3.414479;-3.153056;7.704114;6.805943;11.0327;4.84392;5.449426;5.603412;6.338682;-0.7146739;16.02906;2.407077;9.094128;8.156872;0.5228028;3.772175;15.19766;12.8521;6.850384;8.902693	147.111997310826;234.143588954717;397.205816805553;510.289227261996;623.371876952143;694.412099631114;807.485003210244;936.544716263729;1037.58419560864;1184.6598876336;1388.70231656508;216.13279690676;379.193412905331;181.107510224454;209.102162629956;356.136705764373;413.15754619434;560.195964654442;707.252641621605;937.351993505566;1050.42876103123;1121.46627989571;1234.5588461012;1347.6384719…	28	0.5066753	0.2043796
20140904-PurClathDigest-1ug-02	6338	3613	0	AHMGMFTELAILYSK	15	0	2 Oxidation (M)	_AHM(ox)GM(ox)FTELAILYSK_		AHM(1)GM(1)FTELAILYSK		AHM(130.47)GM(130.47)FTELAILYSK	0	0	2	P49951;F1MPU0	2	HCD	FTMS	MULTI-MSMS	1	0	872.42586	1742.8372	-0.8155	-2.7062949	47.026	1.8384E-05	130.47	128.62	130.47	1	1	0	0	0	-1	0	0	0	0	y1;y2;y3;y4;y5;y6;y7;y8;y9;y10;y12;y13;y2-H2O;y2-NH3;y3-H2O;y4-H2O;a2;b2;b3;b4;b5;b6;b7;b7-H2O;b8;b9;b9-H2O;b10;b10-H2O;b12;b7(2+)	925562.1;2720737;2335694;1757641;664580;603808.3;175658.8;251414.2;285829.5;305089.1;168367.1;265784;490476.3;61978.9;239439.3;77174.5;1220271;4449572;845932.1;220027.7;146769.2;91706.2;92033.4;76288.3;1119395;1545910;192614.6;2196774;304021.7;223980.1;51115.4	0.0008383036;0.001174328;0.002062669;0.003143115;0.003479415;0.003188097;0.005853543;0.0008996606;0.007328795;0.01232791;0.01048487;0.005064568;0.00119135;-0.0001504949;0.002103225;0.004654988;0.0008581912;0.001090371;0.001913958;0.0030362;0.002864997;0.004305728;0.01539423;0.00729619;0.004048252;0.005983937;0.002134325;0.00638569;0.01474093;0.01430602;0.001806294	5.698405;5.015418;5.192944;6.15948;5.581595;4.591085;7.249045;0.9606225;7.063351;10.40643;7.550118;3.297796;5.512111;-0.6931464;5.546545;9.456033;4.738573;5.214535;5.374221;7.348778;5.114305;6.087902;19.04528;9.23225;4.318826;5.696642;2.067292;5.69404;13.35895;10.6157;4.463759	147.11196586701;234.143658252198;397.206098449766;510.289081983718;623.372809664698;694.410214770789;807.491613304523;936.539160283371;1037.58040962337;1184.64382442414;1388.70253041757;1535.74334994666;216.133076544658;217.118433973856;379.195493207871;492.277005425316;181.107529303531;209.102211745948;356.136787387193;413.15712886891;560.192699300309;707.259672485244;808.296262455211;790.293795…	31	0.5017971	0.1722222
20140904-PurClathDigest-1ug-02	6402	3669	0	AHMGMFTELAILYSK	15	0	2 Oxidation (M)	_AHM(ox)GM(ox)FTELAILYSK_		AHM(1)GM(1)FTELAILYSK		AHM(121.42)GM(121.42)FTELAILYSK	0	0	2	P49951;F1MPU0	2	HCD	FTMS	MULTI-MSMS	1	0	872.42586	1742.8372	-0.8155	-4.5423815	47.275	7.7209E-05	121.42	119.72	121.42	1	1	0	0	0	-1	0	0	0	0	y1;y2;y3;y4;y5;y6;y7;y8;y9;y10;y12;y2-H2O;y3-H2O;y4-H2O;a2;b2;b3;b4;b5;b6;b8;b8-H2O;b9;b9-H2O;b10;b12;b7(2+);b8(2+);b10(2+)	1861505;5551761;4742574;3765453;1419216;1100477;519687.4;677039.8;429716.8;447953.2;481013.4;954463.5;201652.2;112791.9;3157762;1.016526E+07;1665050;576659.7;372396.2;192050.4;1487101;202579.7;1256716;453030.6;3587892;331507.8;243549.7;1063988;1035226	0.0008500006;0.001312125;0.002483594;0.003674255;0.004462132;0.004283428;0.003329225;0.005412142;0.002241824;0.01383065;0.001569171;0.000815419;0.004221773;0.004966634;0.0009546244;0.001125554;0.001699603;0.001754575;0.002478984;0.003379456;0.006680003;0.01444838;-0.00224094;0.01817174;0.007829361;0.00327854;0.005920018;0.004769578;0.002738375	5.777916;5.603937;6.252664;7.200348;7.158059;6.16845;4.12291;5.778902;2.160616;11.67495;1.129948;3.772757;11.13356;10.08911;5.271039;5.382792;4.77233;4.246736;4.425231;4.778234;7.126495;15.71622;-2.133334;17.60129;6.981352;2.432801;14.62984;10.16586;4.879163	147.11195417002;234.143520455005;397.205677525297;510.28855084396;623.371826947563;694.409119439714;807.494137622751;936.534647802296;1037.58549659394;1184.64232168916;1388.71144611473;216.133452475258;379.193374659904;492.276693778703;181.107432870299;209.102176563192;356.137001741891;413.158410494121;560.193085312872;707.260598756772;937.347569780567;919.329236714298;1050.44055470437;1032.40957…	29	0.4895909	0.1972789
20140904-PurClathDigest-1ug-02	6466	3725	0	AHMGMFTELAILYSK	15	0	2 Oxidation (M)	_AHM(ox)GM(ox)FTELAILYSK_		AHM(1)GM(1)FTELAILYSK		AHM(123.76)GM(123.76)FTELAILYSK	0	0	2	P49951;F1MPU0	2	HCD	FTMS	MULTI-MSMS	1	0	872.42586	1742.8372	-0.8155	-5.3456694	47.528	3.5214E-05	123.76	122.06	123.76	1	1	0	0	0	-1	0	0	0	0	y1;y2;y3;y4;y5;y6;y7;y8;y9;y10;y12;y2-H2O;y3-H2O;a2;b2;b3;b4;b5;b6;b8;b8-H2O;b9;b10;b11;b12;b8(2+);b9(2+);b10(2+)	162322.2;521462.7;423795.2;290366.9;130530.2;89264.8;20251.5;37921.9;52381.5;52237.3;32572.4;89618.9;38370.7;282435.2;890846.9;154503.7;29793.4;33246;31213;153157.2;12407.3;88776.1;335434.5;107015.3;28800.8;56969.2;113304.2;85869.9	0.000783389;0.0009374456;0.001875853;0.00204359;0.001765348;0.004091527;0.006850052;0.00570344;0.01262966;-0.004180325;0.01136071;0.001080321;0.001751883;0.0007733246;0.001028286;0.001121621;0.003915385;0.009268386;0.004671271;0.005957572;0.01622311;0.002233023;0.006161869;0.006311349;0.008055172;0.002793101;0.002853069;0.003388804	5.325119;4.003716;4.722617;4.00476;2.831922;5.892097;8.483135;6.089942;12.17229;-3.528712;8.180815;4.998404;4.619995;4.269973;4.917622;3.149405;9.476767;16.54519;6.604751;6.355772;17.64672;2.125806;5.494461;5.112254;5.977263;5.95318;5.426974;6.038087	147.112020781599;234.143895134957;397.206285265923;510.290181509201;623.374523731647;694.409311340481;807.490616795487;936.534356504119;1037.57510875841;1184.66033265968;1388.7016545745;216.133187573143;379.195844549588;181.107614170128;209.10227383088;356.1375797237;413.156249683464;560.186295910908;707.259306941881;937.348292211764;919.327461985795;1050.4360807409;1121.46926568257;1234.55318018…	28	0.5145876	0.2028985
20140904-PurClathDigest-1ug-02	6530	3781	0	AHMGMFTELAILYSK	15	0	2 Oxidation (M)	_AHM(ox)GM(ox)FTELAILYSK_		AHM(1)GM(1)FTELAILYSK		AHM(133.48)GM(133.48)FTELAILYSK	0	0	2	P49951;F1MPU0	2	HCD	FTMS	MULTI-MSMS	1	0	872.42586	1742.8372	-0.8155	-3.853849	47.792	1.5818E-05	133.48	129.97	133.48	1	1	0	0	0	-1	0	0	0	0	y1;y2;y3;y4;y5;y6;y7;y8;y9;y10;y12;y2-H2O;y2-NH3;y3-H2O;y10-H2O;a2;b2;b3;b4;b5;b6;b8;b9;b10;b10-H2O;b11;b12;b8(2+);b9(2+);b10(2+)	384460;1000732;856279.7;534546.6;173481.7;172885.7;57530.4;87921.5;71734.5;89081.1;74448.4;187008.8;24172.1;51736.6;26259;505011.4;1821417;305005.8;55543.8;56970.3;45747.9;252650.6;189817.5;541438.1;21778.2;180572.9;54847.2;130140.3;245450.7;145938	0.0009338827;0.001409697;0.002359855;0.002318003;0.005641451;0.00165599;0.003407195;0.004190619;0.006277269;0.006082088;0.005299553;0.001263542;0.000235985;0.001094996;0.007054335;0.001249271;0.001213465;0.00191617;0.003326527;0.006318667;0.005035366;0.005335365;0.004479868;0.01099182;0.003601967;0.004890736;0.001943489;0.003354185;0.003834264;0.004739005	6.348113;6.020657;5.941139;4.542521;9.049914;2.384738;4.219468;4.474596;6.049904;5.13408;3.816176;5.846133;1.086897;2.887675;6.046718;6.897967;5.803218;5.380434;8.051487;11.27952;7.119551;5.691974;4.264779;9.801311;3.264245;3.961539;1.442141;7.149076;7.293373;8.443863	147.111870287891;234.143422883308;397.205801263714;510.289907096182;623.370647628332;694.411746877238;807.494059652587;936.53586932507;1037.58146114917;1184.65007024605;1388.70771573292;216.133004351813;217.118047493988;379.196501436196;1166.63853331356;181.107138223656;209.102088651771;356.136785174702;413.156838541589;560.189245629894;707.258942847043;937.348914418061;1050.43383389562;1121.4644…	30	0.5115592	0.2054795
20140904-PurClathDigest-1ug-02	6595	3838	0	AHMGMFTELAILYSK	15	0	2 Oxidation (M)	_AHM(ox)GM(ox)FTELAILYSK_		AHM(1)GM(1)FTELAILYSK		AHM(103.88)GM(103.88)FTELAILYSK	0	0	2	P49951;F1MPU0	2	HCD	FTMS	MULTI-MSMS	2	0	872.42586	1742.8372	-0.8155	-3.3948274	48.058	0.00022888	103.88	102.17	103.88	1	1	0	0	0	-1	0	0	0	0	y1;y2;y3;y4;y5;y6;y7;y8;y9;y10;y12;y13;y2-H2O;y2-NH3;y3-H2O;y14(2+);a2;b2;b3;b4;b5;b8;b8-H2O;b9;b10;b10-H2O;b12;b8(2+)	128758.2;351664.5;338145.2;243698.7;75190.5;69483.7;28653.7;29146;26358.6;37810.4;18701.7;15744.6;79574.2;5451.3;13528.5;10606;197168.5;642884.6;112931.1;27695.1;18327.4;97137.6;7529.7;154727.1;302698.5;9357.5;15394.2;35748.3	0.001122809;0.001253011;0.002196311;0.003347517;0.003970182;0.002970306;0.001298683;-0.00216644;-0.005664755;0.009656461;-0.01204549;-0.003169518;0.001097095;-0.0007338836;0.0006511837;-0.008468471;0.001206621;0.001251936;0.002213138;0.003636808;0.002506552;0.0110876;0.006371173;0.006335491;0.008893204;0.01564299;0.007197463;0.004506212	7.632359;5.351465;5.5294;6.560043;6.368878;4.277451;1.608284;-2.313233;-5.459513;8.151344;-8.673776;-2.063822;5.076013;-3.380098;1.71727;-10.11867;6.662469;5.987202;6.214297;8.802493;4.474444;11.82875;6.93018;6.03132;7.929977;14.17645;5.340805;9.604518	147.111681361507;234.143579569308;397.205964808133;510.288877581999;623.372318897459;694.410432561141;807.496168164402;936.542226384296;1037.5934031728;1184.64649587306;1388.72506077627;1535.75158403223;216.133170799473;217.119017362613;379.196945248784;836.915769892292;181.10718087362;209.102050180645;356.136488207248;413.156528261045;560.193057744558;937.343162183657;919.337313924523;1050.43197…	28	0.4926095	0.1717791
20140904-PurClathDigest-1ug-02	6676	3909	0	AHMGMFTELAILYSK	15	0	2 Oxidation (M)	_AHM(ox)GM(ox)FTELAILYSK_		AHM(1)GM(1)FTELAILYSK		AHM(105.14)GM(105.14)FTELAILYSK	0	0	2	P49951;F1MPU0	2	HCD	FTMS	MULTI-MSMS	3	0	872.42586	1742.8372	-0.8155	-5.230914	48.371	0.0003693	105.14	102.85	105.14	1	1	0	0	0	-1	0	0	0	0	y1;y2;y3;y4;y5;y6;y7;y8;y9;y10;y12;y2-H2O;y3-H2O;a2;b2;b3;b4;b5;b6;b7;b8;b8-H2O;b9;b10;b11;b8(2+);b9(2+);b10(2+)	44501.8;134420;103031.3;65770.8;27635.3;18575.2;9552.5;6968.2;18989.6;11915;11228.1;28021.8;5383.7;59231.7;218441;31848;6269.6;5937.3;7188.5;4143.9;35320.9;4142.9;29367.2;62417.4;32914.6;18196.2;39722.2;20295.3	0.000962204;0.001287824;0.002814984;0.003223065;0.004115242;-9.264581E-06;-0.006578523;-0.002118947;0.006140365;-0.005485266;0.00880395;0.001559423;0.003856625;0.00113429;0.001320816;0.00283433;0.003613588;0.004803701;-0.0007931784;-0.01019322;0.008992653;0.01040466;0.0111526;0.005268189;0.001230904;0.002905353;0.002767229;0.001877749	6.540629;5.500145;7.086974;6.316155;6.601581;-0.01334159;-8.146736;-2.262522;5.917958;-4.630239;6.339687;7.21512;10.17059;6.263085;6.31661;7.958563;8.746293;8.575117;-1.121473;-12.61035;9.593747;11.31762;10.6172;4.697574;0.9970397;6.192433;5.263693;3.345718	147.111841966632;234.143544756919;397.20534613483;510.289002034497;623.372173837698;694.41341213198;807.504045370315;936.542178891439;1037.58159805336;1184.66163760019;1388.7042113366;216.132708470767;379.193739807381;181.107253204561;209.101981301032;356.135867015542;413.156551480294;560.190760595473;707.264771391603;808.321849908782;937.345257130127;919.333280432779;1050.42716116709;1121.470159…	28	0.5132645	0.2170543
20140904-PurClathDigest-1ug-02	6742	3967	0	AHMGMFTELAILYSK	15	0	2 Oxidation (M)	_AHM(ox)GM(ox)FTELAILYSK_		AHM(1)GM(1)FTELAILYSK		AHM(125.36)GM(125.36)FTELAILYSK	0	0	2	P49951;F1MPU0	2	HCD	FTMS	MULTI-MSMS	5	1	872.42586	1742.8372	-0.8155	-5.4604248	48.633	1.5052E-05	125.36	123.65	125.36	1	1	0	0	0	-1	0	0	0	0	y1;y2;y3;y4;y5;y6;y7;y8;y9;y10;y12;y13;y2-H2O;y2-NH3;y3-H2O;y9-H2O;a2;b2;b3;b4;b5;b6;b8;b8-H2O;b9;b10;b11;b12;b8(2+)	38315.7;96146.2;79526.7;54699.9;19832.1;19230.1;8010.8;8831.3;6784.5;5036.5;7956.6;7521.2;18005.8;1984;3812.5;2280.1;48912.5;174424;25739.2;8644;4837.8;3733.1;23689.5;5145.4;49917.8;71980.7;24151.8;8056.2;10803.7	0.0008203035;0.001231025;0.002687908;0.003092001;0.000844569;0.005055565;0.003865256;-0.002579779;0.0006302968;0.0004184894;0.01102578;0.005355148;0.0006818229;0.002360382;-0.0004267741;-0.006424712;0.001027215;0.001121146;0.003153007;0.001994358;0.005576681;0.008721667;0.008141193;-0.0129041;0.009236021;0.009580728;0.01230618;0.007617039;0.005385784	5.576048;5.257564;6.767047;6.059312;1.354832;7.280392;4.786732;-2.754578;0.607464;0.3532582;7.939629;3.487008;3.154637;10.87153;-1.125465;-6.301309;5.671857;5.361712;8.853389;4.827106;9.954982;12.33171;8.685365;-14.03601;8.792618;8.54304;9.968172;5.652149;11.47925	147.111983867122;234.143601555672;397.205473210707;510.289133098156;623.375444510578;694.408347302464;807.493601592382;936.542639723447;1037.58710812125;1184.6557338449;1388.70198950772;1535.74305936695;216.133586071245;217.115923096864;379.198023206546;1019.58359844357;181.107360279645;209.102180971263;356.135548338631;413.158170710537;560.189987615475;707.255256546124;937.34610859072;919.356589…	29	0.5210395	0.1895425
20140904-PurClathDigest-1ug-02	6958	4156	0	AHMGMFTELAILYSK	15	0	2 Oxidation (M)	_AHM(ox)GM(ox)FTELAILYSK_		AHM(1)GM(1)FTELAILYSK		AHM(131.96)GM(131.96)FTELAILYSK	0	0	2	P49951;F1MPU0	2	HCD	FTMS	MULTI-MSMS	5	0	872.42586	1742.8372	-0.8155	-2.4767841	49.547	1.7113E-05	131.96	130.26	131.96	1	1	0	0	0	-1	0	0	0	0	y1;y2;y3;y4;y5;y6;y7;y8;y9;y10;y12;y13;y2-H2O;y3-H2O;y4-H2O;a2;b2;b3;b4;b6;b8;b9;b10;b11;b7(2+);b8(2+);b9(2+);b10(2+)	12147.9;34383.1;27533.7;18209.3;7645.4;5382.5;2496.5;2816.7;3110.3;1712;1755.2;1205;4484.8;2492.1;1150.9;18111.5;56083.6;9411.1;2506;2417.3;7099.8;5506.6;17515.4;5776.6;1859.8;3858.5;8891.7;5923.2	0.001015797;0.001266944;0.002505265;0.002882844;0.005905311;0.005085448;-0.001848302;0.002535219;0.00489552;0.004779566;0.01040337;0.02623109;0.001335678;-0.0004074069;0.005017817;0.0009377765;0.001177114;0.002816882;-0.0002980159;0.008544321;0.007671247;0.003901851;0.005806277;0.01528102;0.001480669;0.004285438;0.001814473;0.005173332	6.904931;5.410971;6.307224;5.64943;9.473198;7.323427;-2.288921;2.707012;4.718197;4.034575;7.491434;17.08062;6.179892;-1.074391;10.19308;5.178012;5.629376;7.909572;-0.7213078;12.08096;8.184003;3.714512;5.177382;12.37786;3.659062;9.133957;3.451399;9.217744	147.11178837396;234.143565636425;397.205655853635;510.289342255464;623.370383768695;694.408317419174;807.499315149975;936.537524725329;1037.58284289775;1184.6513727687;1388.70261191262;1535.7221834258;216.132932216123;379.198003839349;492.276642595323;181.107449718154;209.102125002311;356.135884462728;413.160463084573;707.255433892416;937.346578536564;1050.43441191292;1121.46962127532;1234.544210…	28	0.505174	0.2074074
20140904-PurClathDigest-1ug-02	9224	6088	0	AHMGMFTELAILYSK	15	0	2 Oxidation (M)	_AHM(ox)GM(ox)FTELAILYSK_		AHM(1)GM(1)FTELAILYSK		AHM(102.52)GM(102.52)FTELAILYSK	0	0	2	P49951;F1MPU0	2	HCD	FTMS	MULTI-MSMS	5	0	872.42586	1742.8372	-0.28354	-0.75545285	61.503	0.00039268	102.52	99.016	102.52	1	1	0	0	0	-1	0	0	0	0	y1;y2;y3;y4;y5;y6;y8;y9;y2-H2O;y3-H2O;a2;b2;b3;b4;b8;b9;b10;b11;b8(2+);b9(2+);b10(2+)	4746.5;13305.8;12857.8;7189.5;2438.5;2128.8;1356.8;829.3;1568.1;808.7;5895.3;23770.8;3748.8;506.7;3252.8;2794.2;7460.9;2559.2;1248.7;2473.2;1930.7	0.0009366155;0.001269665;0.002464628;0.003775651;0.00657497;0.002905364;0.005366281;0.008383949;0.001152978;0.003022461;0.000971859;0.001418594;0.002797663;0.003165115;0.006333796;0.003879653;0.009708383;0.01626723;0.003946478;0.003166119;0.004254911	6.366689;5.422593;6.204917;7.399052;10.54747;4.183929;5.729933;8.080297;5.334574;7.970739;5.366202;6.784224;7.855606;7.660804;6.757145;3.69338;8.65687;13.17672;8.411495;6.022449;7.581307	147.111867555141;234.143562915249;397.205696490501;510.28844944853;623.369714109486;694.410497503207;936.534693662903;1037.57935446877;216.133114916051;379.194573971276;181.10741563568;209.101883522862;356.135903681712;413.15699995373;937.347915987492;1050.43443411055;1121.46571916861;1234.54322430199;469.176816646526;525.719628995867;561.237097098695	21	0.5433763	0.2258064
20140904-PurClathDigest-1ug-02	6531	3782	0	AHMGMFTELAILYSK	15	0	2 Oxidation (M)	_AHM(ox)GM(ox)FTELAILYSK_		AHM(1)GM(1)FTELAILYSK		AHM(79.61)GM(79.61)FTELAILYSK	0	0	2	P49951;F1MPU0	3	HCD	FTMS	MSMS	2	0	581.953	1742.8372	NaN	-3.4387021	47.796	0.0020932	79.614	76.358	79.614	1	1	0	0	0	-1	0	0	0	0	y1;y2;y3;y4;y5;y6;y7;y8;y2-H2O;a2;b2;b3;b4;b5;b6;b8;b8-H2O;b9;b10;b7(2+);b8(2+)	147616.1;513313.9;650968.8;493874.5;316663;473004.2;206396.1;92514.8;80834.3;48448.8;210772.7;83773.3;116356;347751.8;178080.7;200423.7;54013.5;30873.2;43496.5;108957.9;46008	0.0007656161;0.001254984;0.00161556;0.003477746;0.003545086;0.004968537;0.004341439;0.009644312;0.001902038;0.001060887;0.001547767;0.0008062457;0.00094964;0.004020175;0.0003794529;0.002464054;0.01769804;-0.006838235;0.0204097;-0.0006579563;-0.001686582	5.204306;5.359889;4.067305;6.81525;5.686944;7.155064;5.376441;10.29792;8.800341;5.85778;7.401978;2.263858;2.298484;7.17643;0.5365084;2.62874;19.2511;-6.509845;18.1993;-1.625948;-3.594726	147.112038554513;234.143577596851;397.206545558744;510.288747353424;623.372743993649;694.408434330639;807.493125408814;936.530415632425;216.132365855793;181.107326607953;209.101754350286;356.137895099403;413.15921542872;560.191544121782;707.263598760299;937.351785729614;919.325987060519;1050.44515199904;1121.45501785413;404.660124533288;469.182449707556	21	0.4835554	0.2307692
20140904-PurClathDigest-1ug-02	6594	3837	0	AHMGMFTELAILYSK	15	0	2 Oxidation (M)	_AHM(ox)GM(ox)FTELAILYSK_		AHM(1)GM(1)FTELAILYSK		AHM(85.45)GM(85.45)FTELAILYSK	0	0	2	P49951;F1MPU0	3	HCD	FTMS	MSMS	1	0	581.953	1742.8372	NaN	-2.5780365	48.055	0.0061205	85.45	83.112	85.45	1	1	0	0	0	-1	0	0	0	0	y1;y2;y3;y4;y5;y6;y7;y8;y2-H2O;y3-H2O;y4-H2O;y6-H2O;y7-H2O;y8-H2O;a2;b2;b4;b5;b6;b7;b7-H2O;b8;b8-H2O;b7(2+)	72593.1;244710;327229.2;236156.9;171628.7;239689.6;84732.3;50290.4;35119.9;31163.9;12587;10654.8;11042.1;17823.7;18000.2;137633.1;65471.5;191331.9;76616.4;24729;51795.6;103073.9;15089.4;46713.3	0.0007757722;0.001349744;0.002392835;0.003357992;0.003483715;0.002960448;0.005682449;0.005193352;0.001282721;0.001972999;-0.004244642;0.0007686161;0.009648305;-0.01717626;0.0005683948;0.001295382;0.002309973;0.004144083;0.008462971;0.005084599;0.007722036;0.002515825;0.006750532;-0.000106089	5.273343;5.764603;6.02417;6.58057;5.588494;4.263255;7.03716;5.545284;5.934869;5.203117;-8.622311;1.13633;12.22113;-18.69939;3.138433;6.194975;5.591017;7.397619;11.96593;6.290434;9.771101;2.683971;7.342827;-0.2621685	147.112028398414;234.143482836373;397.20576828392;510.288867107735;623.372805364659;694.410442418993;807.491784398339;936.534866591722;216.132985173279;379.195623432977;492.28590505477;676.402069564979;789.477253856005;918.546671517578;181.107819099848;209.102006735069;413.157855096066;560.191420214259;707.255515242481;808.30657208842;790.293369965015;937.351733958364;919.336934565096;404.6595726…	24	0.4861129	0.2330097
20140904-PurClathDigest-1ug-02	6680	3913	0	AHMGMFTELAILYSK	15	0	2 Oxidation (M)	_AHM(ox)GM(ox)FTELAILYSK_		AHM(1)GM(1)FTELAILYSK		AHM(90.76)GM(90.76)FTELAILYSK	0	0	2	P49951;F1MPU0	3	HCD	FTMS	MSMS	7	0	581.953	1742.8372	NaN	-4.4715009	48.384	0.00052488	90.759	88.456	90.759	1	1	0	0	0	-1	0	0	0	0	y1;y2;y3;y4;y5;y6;y7;y8;y2-H2O;y3-H2O;y8-H2O;a2;b2;b3;b4;b5;b6;b8;b8-H2O;b7(2+);b8(2+)	26245;86506.2;78442.9;68683;40950.7;74855.1;40855.4;18960.1;7550;6423.1;5798;4796;37426.6;18786.5;21013;52681;19664.7;22813;8814.9;17162.6;9930.3	0.001015716;0.001261424;0.003174439;0.003080359;0.006177487;0.003927552;0.004597261;0.005920276;0.001046731;0.0009055377;0.01428049;0.001053479;0.001305511;0.00222955;0.003546134;0.004832631;0.01375422;0.00900189;0.00353036;0.003080256;0.001846846	6.904385;5.387397;7.991941;6.036498;9.909822;5.655959;5.693253;6.321473;4.842989;2.388042;15.54737;5.816879;6.243415;6.26038;8.583026;8.62676;19.44745;9.603601;3.840102;7.612028;3.936337	147.11178845418;234.143571156214;397.204986679811;510.289144739996;623.370111592249;694.409475315505;807.492869586806;936.534139668533;216.133221163452;379.196690894801;918.515214762997;181.107334015314;209.101996606152;356.136471795475;413.15661893461;560.190731665626;707.250223998014;937.345247892872;919.340154737208;404.656386321393;469.178916278695	21	0.465543	0.244186
20140904-PurClathDigest-1ug-02	6748	3972	0	AHMGMFTELAILYSK	15	0	2 Oxidation (M)	_AHM(ox)GM(ox)FTELAILYSK_		AHM(1)GM(1)FTELAILYSK		AHM(68.04)GM(68.04)FTELAILYSK	0	0	2	P49951;F1MPU0	3	HCD	FTMS	MSMS	3	0	581.953	1742.8372	NaN	-4.4715009	48.661	0.021332	68.044	65.639	68.044	1	1	0	0	0	-1	0	0	0	0	y1;y2;y3;y4;y5;y6;y7;y8;y2-H2O;y4-H2O;b2;b3;b4;b5;b6;b7;b7-H2O;b8;b8-H2O;b7(2+);b8(2+)	13581.8;55610.7;57488.2;48336.5;31989.4;51797.6;18791.2;11036.1;11542;2946.9;31613.4;9664.2;11339;34739.7;15905.7;3940.4;12054.2;21108.9;6038.2;6174;3544.7	0.00105346;0.001303901;0.001773052;0.002539909;0.00505053;0.003679877;0.00596678;-0.004148701;0.001539262;0.006900952;0.001105793;0.001252273;0.003164318;0.004461002;0.01003188;0.001724274;-0.000169499;0.0005013356;0.004085867;0.005072991;0.003660743	7.160949;5.56881;4.463807;4.977386;8.101962;5.299288;7.389279;-4.429797;7.121837;14.0185;5.28829;3.516262;7.658875;7.963357;14.18427;2.133184;-0.214474;0.5348414;4.44435;12.5366;7.802475	147.111750710895;234.143528679563;397.20638806628;510.289685190604;623.371238549252;694.409722990228;807.491500067343;936.544208644855;216.132728632199;492.274759460566;209.10219632376;356.137449072548;413.157000751097;560.191103295488;707.253946334548;808.309932413245;790.301261500056;937.353748447929;919.339599230623;404.654393586045;469.177102382103	21	0.4675334	0.2164948
20140904-PurClathDigest-1ug-02	6959	4157	0	AHMGMFTELAILYSK	15	0	2 Oxidation (M)	_AHM(ox)GM(ox)FTELAILYSK_		AHM(1)GM(1)FTELAILYSK		AHM(85.84)GM(85.84)FTELAILYSK	0	0	2	P49951;F1MPU0	3	HCD	FTMS	MSMS	6	0	581.953	1742.8372	NaN	-2.4059034	49.552	0.00067499	85.837	83.693	85.837	1	1	0	0	0	-1	0	0	0	0	y1;y2;y3;y4;y5;y6;y7;y8;y2-H2O;y3-H2O;y8-H2O;a2;b2;b3;b4;b5;b6;b7;b7-H2O;b8;b8-H2O;b7(2+);b8(2+);b9(2+)	7826;25053.3;31327.2;22676.7;16139.2;18077.3;10363;4634.9;4972.4;3219.9;2333;1356.1;15322.2;3448.3;7193.3;17346.8;4818.5;1707.6;6230.2;10700.9;2420.6;5101.3;1731.9;1914.8	0.0005500217;0.001448818;0.0025861;0.002744009;0.005541202;0.003963507;0.008136204;0.002783535;0.001848916;0.001186211;-0.00669904;0.0009930958;0.001088873;0.002243982;0.004513033;0.004765197;0.005506565;-0.001258645;0.00913042;0.003131503;0.006152453;0.001887596;0.00701227;-0.008875773	3.738789;6.187737;6.510735;5.377357;8.889094;5.707738;10.07593;2.972156;8.55455;3.128222;-7.293169;5.483464;5.207373;6.300906;10.92332;8.506382;7.785789;-1.557126;11.55322;3.3408;6.692268;4.664674;14.946;-16.88271	147.112254148968;234.143383762716;397.205575018443;510.289481090399;623.370747877856;694.409439360284;807.489330644516;936.537276409236;216.132418978655;379.196410221866;918.536194297977;181.107394398897;209.102213243615;356.136457362878;413.155652036111;560.19079909994;707.258471648346;808.31291533249;790.291961580546;937.351118280786;919.337532644424;404.65757898109;469.173750855004;525.7316708…	24	0.5005578	0.3
20140904-PurClathDigest-1ug-03	6046	3462	0	AHMGMFTELAILYSK	15	0	2 Oxidation (M)	_AHM(ox)GM(ox)FTELAILYSK_		AHM(1)GM(1)FTELAILYSK		AHM(128.35)GM(128.35)FTELAILYSK	0	0	2	P49951;F1MPU0	3	HCD	FTMS	MULTI-MSMS	7	0	581.953	1742.8372	-0.36271	-3.7829684	46.882	1.879E-05	128.35	125.95	128.35	1	1	0	0	0	-1	0	0	0	0	y1;y2;y3;y4;y5;y6;y7;y8;y9;y2-H2O;y2-NH3;y3-H2O;y4-H2O;y5-H2O;y8-H2O;a2;b2;b3;b4;b5;b6;b7;b7-H2O;b8;b8-H2O;b9;b10;b8(2+)	138631.8;365061.7;431162.2;367056.5;224867.1;364705.2;178820.3;87331.3;10458;62949.4;10524.1;38654;15677.8;13932.5;23282.1;42739.1;182255.7;65150.8;93738.1;228805.8;121097.5;97973.5;183527.7;167169.3;96872.6;14645.6;29315.6;27490.4	0.0007274366;0.001206329;0.001999625;0.002517287;0.003187259;0.00381249;0.004032779;0.006217368;0.007812927;0.001638507;-0.0001820861;0.002372431;0.0009436338;-0.001059323;0.009331143;0.001341164;0.001152574;0.001265302;0.003385941;0.00337653;0.003917284;0.005021838;0.004358435;0.006789736;0.003041469;-0.007463039;-0.0003997312;0.005214963	4.944778;5.152091;5.034225;4.933055;5.112924;5.490261;4.994195;6.638701;7.529953;7.581026;-0.8386487;6.25649;1.916861;-1.749887;10.15889;7.405365;5.512014;3.552848;8.195294;6.027449;5.538675;6.212789;5.514935;7.243564;3.308315;-7.10464;-0.3564332;11.11516	147.112076733955;234.143626251167;397.206161493806;510.289707812124;623.373101820344;694.409590377876;807.493434068401;936.533842576215;1037.57992549042;216.132629387071;217.118465565127;379.195224001327;492.280716779051;605.366783716591;918.520164114946;181.107046330916;209.10214954285;356.137436042914;413.156779127283;560.192187767265;707.260060929147;808.30663484868;790.296733565928;937.347460…	28	0.5249846	0.2295082
20140904-PurClathDigest-1ug-03	6113	3520	0	AHMGMFTELAILYSK	15	0	2 Oxidation (M)	_AHM(ox)GM(ox)FTELAILYSK_		AHM(1)GM(1)FTELAILYSK		AHM(68.97)GM(68.97)FTELAILYSK	0	0	2	P49951;F1MPU0	3	HCD	FTMS	MULTI-MSMS	2	0	581.953	1742.8372	-0.36271	-3.4387021	47.153	0.0075354	68.972	67.329	68.972	1	1	0	0	0	-1	0	0	0	0	y1;y2;y3;y4;y5;y6;y7;y8;y2-H2O;y3-H2O;y8-H2O;a2;b2;b3;b4;b5;b6;b8;b8-H2O;b7(2+);b8(2+)	1026715;2973222;3740227;3018092;1972081;2928491;1313612;621426.3;423012.7;339592;316632.8;197635.5;1480480;623681;399284.5;1713284;729943.8;1381493;146609.8;893325.2;241114.5	0.001048843;0.00134579;0.002252515;0.003976753;0.004863097;0.005948559;0.002743902;0.001895954;0.001823727;-0.002252313;0.0178495;0.001521756;0.001267045;0.004251453;0.002762867;0.005579939;0.001307437;0.002762314;0.01672951;0.003235767;7.950733E-05	7.129565;5.747714;5.6709;7.79315;7.801284;8.566381;3.398043;2.024428;8.438008;-5.939646;19.43307;8.402531;6.059456;11.93777;6.687202;9.960797;1.848587;2.946935;18.19756;7.996335;0.1694599	147.111755327829;234.143486790729;397.205908603626;510.288248346344;623.3714259822;694.407454308381;807.494722945927;936.538163990193;216.132444166764;379.199848745432;918.511645756122;181.106865738708;209.102035072119;356.134449892643;413.157402201694;560.189984357917;707.262670776418;937.351487469325;919.326955588624;404.656230810269;469.180683617719	21	0.490169	0.21875
20140904-PurClathDigest-1ug-03	6177	3576	0	AHMGMFTELAILYSK	15	0	2 Oxidation (M)	_AHM(ox)GM(ox)FTELAILYSK_		AHM(1)GM(1)FTELAILYSK		AHM(73.39)GM(73.39)FTELAILYSK	0	0	2	P49951;F1MPU0	3	HCD	FTMS	MULTI-MSMS	2	0	581.953	1742.8372	-0.36271	-4.1272346	47.413	0.0060828	73.386	71.049	73.386	1	1	0	0	0	-1	0	0	0	0	y1;y2;y3;y4;y5;y6;y7;y8;y2-H2O;a2;b2;b3;b4;b5;b6;b8;b8-H2O;b8(2+)	91403.4;328100.8;344380.3;215163.4;143046.8;264934.5;119821.8;43357;56221;18941.7;141756;56249.4;56981.2;171393;79234.5;128797.4;25816.1;24613.3	0.0006747568;0.001422299;0.002871611;0.003737443;0.004837101;0.003850847;0.00123722;0.005533461;0.000655725;0.001156748;0.0007032082;0.001318802;0.00303294;0.004316874;0.004780913;0.009603413;-0.01386016;0.003058635	4.586683;6.074478;7.229538;7.324176;7.759581;5.545499;1.532168;5.908443;3.033887;6.387091;3.362982;3.703071;7.340888;7.706072;6.759775;10.24534;-15.07592;6.51914	147.112129413829;234.143410281437;397.205289507784;510.288487656362;623.371451978194;694.409552020083;807.496229627775;936.534526483222;216.133612169219;181.107230746275;209.102598908615;356.137382543218;413.157132128427;560.19124742287;707.259197300128;937.344646370713;919.35754525669;469.177704490016	18	0.4856078	0.2117647
20140904-PurClathDigest-1ug-03	6242	3633	0	AHMGMFTELAILYSK	15	0	2 Oxidation (M)	_AHM(ox)GM(ox)FTELAILYSK_		AHM(1)GM(1)FTELAILYSK		AHM(76.01)GM(76.01)FTELAILYSK	0	0	2	P49951;F1MPU0	3	HCD	FTMS	MULTI-MSMS	3	0	581.953	1742.8372	-0.20191	-3.6108353	47.683	0.0054563	76.01	72.069	76.01	1	1	0	0	0	-1	0	0	0	0	y1;y2;y3;y4;y5;y6;y7;y8;y2-H2O;y4-H2O;a2;b2;b3;b4;b5;b6;b7;b7-H2O;b8;b8-H2O;b10;b7(2+)	67856.7;241537.4;245018.8;214316.6;146248.1;225979.9;82963.3;37786.6;49023.6;12436.3;22201.6;97455.5;32711.7;50326.4;167919.8;60141.5;11941.3;50639.6;90438;24336.4;13958.3;23079.3	0.001090864;0.001585588;0.002613563;0.00350777;0.004693696;0.003939756;0.004165302;0.006665413;0.0007484217;0.004508849;0.0008430688;0.001279755;-0.0002292721;0.0005951262;0.003620833;0.007892038;-0.00302551;0.008240228;0.007677312;0.007210331;0.002298409;0.003281055	7.415209;6.771873;6.579875;6.87409;7.529531;5.673535;5.158311;7.117112;3.462775;9.159167;4.655073;6.120244;-0.6437716;1.440427;6.463558;11.15867;-3.742986;10.4268;8.190474;7.842972;2.049455;8.108253	147.111713306488;234.143246992015;397.205547555868;510.288717328764;623.371595383778;694.409463111437;807.49330154618;936.533394531231;216.133519472473;492.277151564092;181.107544425874;209.102022361515;356.138930617248;413.159569942495;560.191943464093;707.256086175006;808.314682197542;790.292851773035;937.346572471007;919.336474766569;1121.47312914253;404.656185521856	22	0.5089897	0.2528736
20140904-PurClathDigest-1ug-03	6307	3690	0	AHMGMFTELAILYSK	15	0	2 Oxidation (M)	_AHM(ox)GM(ox)FTELAILYSK_		AHM(1)GM(1)FTELAILYSK		AHM(82.92)GM(82.92)FTELAILYSK	0	0	2	P49951;F1MPU0	3	HCD	FTMS	MULTI-MSMS	4	0	581.953	1742.8372	-0.20191	-2.5780365	47.963	0.0038047	82.925	78.399	82.925	1	1	0	0	0	-1	0	0	0	0	y1;y2;y3;y4;y5;y6;y7;y8;y2-H2O;y3-H2O;a2;b2;b3;b4;b5;b6;b8;b8-H2O;b9;b10;b10-H2O;b11;b7(2+)	74607.3;251062.3;263230.8;183646.8;147746.8;212273;78789;29904.1;42800.6;32463.1;30580.5;114716.5;27912.6;55418.4;125541.2;55654;93313.6;31020.6;10574.5;12200.7;13905.4;9550.7;46872	0.001073945;0.001507418;0.002725631;0.002366712;0.00459581;0.004512961;0.004852774;0.01869525;0.0008946567;0.004599934;0.0002832756;0.001172991;0.001507969;0.004702749;0.00470794;0.004207136;0.004523015;0.011865;-0.001161858;0.01242567;0.007287284;0.01554203;0.002205447	7.300202;6.438012;6.862019;4.637976;7.372504;6.498996;6.009682;19.96244;4.139373;12.13085;1.564125;5.609654;4.234236;11.38252;8.404172;5.948501;4.825323;12.90611;-1.106069;11.07987;6.604046;12.58929;5.450161	147.111730225251;234.143325162998;397.205435487818;510.289858387036;623.37169326936;694.40888990685;807.492614073735;936.521364690577;216.133373237527;379.192996498298;181.108104219043;209.102129126188;356.137193376185;413.155462319484;560.190856356552;707.25977107776;937.349726768722;919.331820096463;1050.43947562231;1121.46300188591;1103.4575755809;1234.54394950271;404.657261129594	23	0.4917054	0.2277228
20140904-PurClathDigest-1ug-03	6382	3756	0	AHMGMFTELAILYSK	15	0	2 Oxidation (M)	_AHM(ox)GM(ox)FTELAILYSK_		AHM(1)GM(1)FTELAILYSK		AHM(106.58)GM(106.58)FTELAILYSK	0	0	2	P49951;F1MPU0	3	HCD	FTMS	MULTI-MSMS	7	1	581.953	1742.8372	-0.20191	-4.2993678	48.265	0.00018397	106.58	103.27	106.58	1	1	0	0	0	-1	0	0	0	0	y1;y2;y3;y4;y5;y6;y7;y8;y2-H2O;y3-H2O;y5-H2O;y8-H2O;a2;b2;b3;b4;b5;b6;b7;b7-H2O;b8;b8-H2O;b9;b7(2+);b9(2+)	55901.7;158397.6;199228.9;163944.5;119018.5;145694.2;70831.5;24124.5;41468.6;20656.7;5349.2;6088.8;16174;89078.9;30927.6;41544.7;111914.1;48237.4;11782.5;71652.4;73699.6;20925.9;13796.4;22854.9;7353.8	0.0009525379;0.001361115;0.002731633;0.0034229;0.003888839;0.004150263;0.002100449;0.005760573;0.001410944;0.002431042;-0.003365348;0.005526285;0.001616048;0.001522733;0.002413633;0.002022956;0.004449848;0.00271697;0.007320539;0.004873724;0.004116322;0.005236026;-0.003508676;0.002487688;0.004693708	6.474923;5.813165;6.87713;6.70777;6.238388;5.976682;2.60119;6.150948;6.528133;6.411058;-5.559167;6.016484;8.92318;7.282257;6.777273;4.896325;7.943446;3.841537;9.056662;6.166958;4.391446;5.695428;-3.340191;6.147646;8.928184	147.111851632696;234.143471465933;397.205429485436;510.288802199311;623.372400240685;694.409252603748;807.495366399267;936.534299370543;216.132856950078;379.195165390331;605.369089741158;918.523968973059;181.106771446395;209.101779383872;356.136287712282;413.158142112105;560.191114449544;707.261261243013;808.304336148128;790.296218277343;937.350133461148;919.338449071336;1050.44182244003;404.6569…	25	0.5095329	0.2
20140904-PurClathDigest-1ug-03	6450	3815	0	AHMGMFTELAILYSK	15	0	2 Oxidation (M)	_AHM(ox)GM(ox)FTELAILYSK_		AHM(1)GM(1)FTELAILYSK		AHM(92.94)GM(92.94)FTELAILYSK	0	0	2	P49951;F1MPU0	3	HCD	FTMS	MULTI-MSMS	3	1	581.953	1742.8372	-0.20191	-3.7829684	48.539	0.0014129	92.939	89.635	92.939	1	1	0	0	0	-1	0	0	0	0	y1;y2;y3;y4;y5;y6;y7;y8;y2-H2O;y4-H2O;y8-H2O;a2;b2;b3;b4;b5;b6;b7;b7-H2O;b8;b8-H2O;b9;b10	29690.6;85136.1;120253.1;86940.4;48976.5;79201.5;43467.9;12332.5;20232.2;3928;4012.6;10680.1;43529.4;14491.2;18404.4;62530.4;28492.4;21178.8;38641.9;32485.2;18394;3053;7434.3	0.0008147495;0.001101582;0.002215985;0.002185843;0.005916068;0.002577719;0.002930368;0.009132126;0.0008076449;0.007110019;0.005987851;0.0009348634;0.0009609523;0.002106147;0.002911382;0.004489719;0.006523931;0.004483489;0.008003644;0.005806985;-0.002068193;-0.003842074;0.01653283	5.538294;4.704726;5.578931;4.283531;9.490455;3.712095;3.628963;9.751014;3.736788;14.4432;6.518996;5.161927;4.595607;5.913873;7.046668;8.014622;9.224266;5.546764;10.12744;6.195119;-2.249636;-3.657578;14.74226	147.111989421157;234.143730998478;397.205945134069;510.290039256081;623.370373011403;694.410825148468;807.494536480086;936.530927818099;216.133460249314;492.274550394249;918.523507406949;181.107452631314;209.102341164542;356.136595198484;413.157253686913;560.191074577538;707.257454282335;808.307173198523;790.293088357179;937.348442798074;919.345753290046;1050.44215583776;1121.45889471876	23	0.5037155	0.2149533
20140904-PurClathDigest-1ug-03	6512	3869	0	AHMGMFTELAILYSK	15	0	2 Oxidation (M)	_AHM(ox)GM(ox)FTELAILYSK_		AHM(1)GM(1)FTELAILYSK		AHM(87.86)GM(87.86)FTELAILYSK	0	0	2	P49951;F1MPU0	3	HCD	FTMS	MULTI-MSMS	1	1	581.953	1742.8372	-0.20191	-6.5370983	48.81	0.0026253	87.863	85.457	87.863	1	1	0	0	0	-1	0	0	0	0	y1;y2;y3;y4;y5;y6;y7;y8;y2-H2O;y3-H2O;y4-H2O;a2;b2;b3;b4;b5;b6;b7;b7-H2O;b8;b8-H2O;b9;b10;b7(2+);b8(2+)	24916.7;95143.6;95470.1;78167;58841.9;83056.8;40616.1;16103.4;20635;15544.8;3802.5;8377.5;39209.1;12988.7;18800.8;51950.1;25668.1;3290.9;14152.4;42925.8;8351.6;5865.1;8283.2;7450.4;3290.8	0.0008876267;0.001530186;0.002404437;0.003705872;0.005823089;0.002180894;0.005236642;5.556575E-05;0.00164829;0.00390263;0.005352818;0.00167836;0.00140001;0.001766845;0.003135296;0.004115391;0.007727769;0.01527967;0.003619698;0.002425803;0.001376366;-6.129188E-05;0.009750609;0.003523051;0.007502165	6.033683;6.535254;6.053378;7.262308;9.341298;3.140637;6.485068;0.05933089;7.626287;10.29192;10.8736;9.267246;6.69535;4.961141;7.58863;7.346401;10.92641;18.90355;4.580172;2.587933;1.49712;-0.05834886;8.694523;8.706287;15.99018	147.111916543892;234.143302394536;397.205756682164;510.288519227063;623.370465990441;694.411221973827;807.492230205605;936.540004378246;216.132619604716;379.193693802274;492.276307595037;181.106709134284;209.101902106462;356.136934499635;413.157029772776;560.191448906132;707.256250443806;808.296377019968;790.297472302689;937.351823980205;919.342308730932;1050.43837505578;1121.46567694269;404.6559…	25	0.5062699	0.2358491
20140904-PurClathDigest-1ug-03	6550	3903	0	AHMGMFTELAILYSK	15	0	2 Oxidation (M)	_AHM(ox)GM(ox)FTELAILYSK_		AHM(1)GM(1)FTELAILYSK		AHM(95.35)GM(95.35)FTELAILYSK	0	0	2	P49951;F1MPU0	3	HCD	FTMS	MULTI-MSMS	7	1	581.953	1742.8372	-0.20191	-539.97764	48.981	0.00083821	95.345	93.008	95.345	1	1	0	0	0	-1	0	0	0	0	y1;y2;y3;y4;y5;y6;y7;y8;y2-H2O;y2-NH3;y3-H2O;y4-H2O;y6-H2O;y8-NH3;a2;b2;b3;b4;b5;b6;b7;b7-H2O;b8;b8-H2O;b9;b10;b11;b7(2+);b8(2+);b9(2+)	26325.9;82828.6;102031.5;76698.1;44601.5;70040.1;32371.1;11675.7;14159.4;3038.4;7968;4855.6;2080.5;1431.4;7855.2;36925.9;11934.6;17113.3;49896.8;27429.7;7708.9;35946.9;37668.4;11112.6;3382.8;2871.3;3159.2;15886.5;6199.4;3658.9	0.0006762072;0.001085789;0.00235197;0.002665731;0.003383847;0.003900213;0.004043946;0.005761546;0.001594651;-0.00205138;0.001655989;0.001861896;-0.00565462;-0.003914123;0.001053057;0.001001469;-0.0008924319;0.002325139;0.004653569;0.004180883;0.005673082;0.003573916;0.004011691;0.003277295;0.01212974;-0.002431396;-0.002336389;0.002465051;0.005862897;3.321321E-05	4.596543;4.637277;5.921289;5.223957;5.428287;5.61659;5.008024;6.151986;7.378109;-9.448125;4.367106;3.78219;-8.35977;-4.256715;5.814549;4.789372;-2.505849;5.627726;8.307113;5.911382;7.018483;4.522242;4.27982;3.564832;11.54745;-2.168028;-1.892485;6.091704;12.49619;0.06317628	147.112127963345;234.143746791231;397.205809148299;510.289559368465;623.372905232829;694.409502654148;807.49342290163;936.534298398034;216.13267324366;217.120334858971;379.195940443478;492.279798517048;676.408492800812;919.517424965887;181.107334437227;209.102300648022;356.139593777015;413.157839929786;560.190910728099;707.259797330815;808.305983605909;790.297518084632;937.350238092771;919.340407…	30	0.4663971	0.2068966
20140904-PurClathDigest-1ug-03	8894	5905	0	AHMGMFTELAILYSK	15	0	2 Oxidation (M)	_AHM(ox)GM(ox)FTELAILYSK_		AHM(1)GM(1)FTELAILYSK		AHM(85.16)GM(85.16)FTELAILYSK	0	0	2	P49951;F1MPU0	2	HCD	FTMS	MULTI-MSMS	7	0	872.42586	1742.8372	0.84584	-2.3620286	61.479	0.0035134	85.163	80.258	85.163	1	1	0	0	0	-1	0	0	0	0	y1;y2;y3;y4;y5;y6;y9;y10;y12;y2-H2O;y3-H2O;a2;b2;b3;b4;b8;b9;b10;b11;b8(2+);b9(2+);b10(2+)	6030.9;14372.2;13024.4;9809.5;2445.7;2039.2;2137.2;1127;776.7;1971.5;706.8;6549;25980.6;3055.8;870.1;2302.6;1807.7;8966.6;1519.5;1070.1;3614;2794.3	0.0008528313;0.001435497;0.002498009;0.002962848;0.003010476;0.008126156;0.005628644;0.02020981;-0.01826025;0.001382908;0.002482976;0.001322865;0.001233836;0.003100405;0.001294207;0.007141596;0.01026989;0.003580278;-0.01580872;0.00275145;0.005501379;0.003942909	5.797158;6.130846;6.288957;5.806212;4.829331;11.70232;5.42477;17.05993;-13.14887;6.398414;6.548017;7.304328;5.90064;8.705686;3.132469;7.618945;9.776866;3.192482;-12.80499;5.864404;10.46452;7.025385	147.111951339322;234.143397083425;397.205663109421;510.289262251503;623.37327860382;694.405276710892;1037.58210977374;1184.63594252219;1388.73127553911;216.132884986408;379.195113456733;181.107064629237;209.102068280801;356.135600940613;413.158870861424;937.347108187731;1050.42804386925;1121.47184727375;1234.57530025547;469.178011675564;525.717293735949;561.237409099983	22	0.5436839	0.2650602
20140904-PurClathDigest-1ug-03	6048	3463	0	AHMGMFTELAILYSK	15	0	2 Oxidation (M)	_AHM(ox)GM(ox)FTELAILYSK_		AHM(1)GM(1)FTELAILYSK		AHM(130.47)GM(130.47)FTELAILYSK	0	0	2	P49951;F1MPU0	2	HCD	FTMS	MSMS	1	0	872.42586	1742.8372	NaN	-3.853849	46.894	1.5181E-07	130.47	127.09	130.47	1	1	0	0	0	-1	0	0	0	0	y1;y2;y3;y4;y5;y6;y7;y8;y9;y10;y12;y13;y2-H2O;y2-NH3;y3-H2O;a2;b2;b3;b4;b5;b6;b8;b8-H2O;b9;b10;b11;b12;b9(2+)	2258788;5940850;5474055;4069837;1552350;1113423;426842.4;560094.2;476854.8;564009.5;549127.4;389917.1;1224776;122470.5;461430.9;3218586;1.043073E+07;1422875;464317.6;333678.8;245127.8;3019201;470226.8;1339180;4956877;1464025;363810;841486.9	0.0008515359;0.001167898;0.002132464;0.002558798;0.004070069;0.00301314;0.001090982;-0.001395366;0.003730748;0.002296588;0.005891591;0.01243659;0.001139991;0.0027155;0.002744767;0.0009426688;0.001127575;0.002204281;0.002237577;0.004581125;0.01148612;0.00593399;0.001395813;0.00205102;0.00644407;0.00997502;0.01311142;0.003107629	5.788353;4.987956;5.36866;5.014403;6.529115;4.339135;1.351068;-1.489914;3.59561;1.938615;4.242501;8.098131;5.274483;12.50716;7.238408;5.205025;5.39246;6.189428;5.415792;8.177793;16.24048;6.330614;1.518273;1.952541;5.746097;8.079886;9.729238;5.91119	147.11195263465;234.143664682197;397.20602865455;510.289666301063;623.372219010543;694.410389727135;807.496375865562;936.541455309795;1037.58400767051;1184.65385574606;1388.70712369531;1535.73597792284;216.133127903659;217.11556797869;379.194851665312;181.107444825955;209.102174541669;356.136497063906;413.157927491215;560.190983171608;707.25249209279;937.348315793089;919.342289284556;1050.4362627…	28	0.5065997	0.1647059
20140904-PurClathDigest-1ug-03	6112	3519	0	AHMGMFTELAILYSK	15	0	2 Oxidation (M)	_AHM(ox)GM(ox)FTELAILYSK_		AHM(1)GM(1)FTELAILYSK		AHM(139.66)GM(139.66)FTELAILYSK	0	0	2	P49951;F1MPU0	2	HCD	FTMS	MSMS	1	0	872.42586	1742.8372	NaN	-4.7718923	47.15	2.2276E-11	139.66	136.28	139.66	1	1	0	0	0	-1	0	0	0	0	y1;y2;y3;y4;y5;y6;y7;y8;y9;y10;y12;y13;y2-H2O;y3-H2O;y14(2+);a2;b2;b3;b4;b5;b6;b7;b8;b8-H2O;b9;b10;b11;b12;b8(2+);b9(2+);b10(2+)	2090448;5573769;4187222;3618939;1231288;1170078;584317.6;531561.9;567910.4;377420.1;509181.1;500416.6;1019698;464808.5;123908.2;2923652;9657284;1528329;330798.4;546227.1;297050;370007.8;1563841;213660.5;1186344;2808599;1255511;243003.3;707390.7;1075586;1009875	0.0009326598;0.001332448;0.001959525;0.00291498;0.002973778;0.004863175;0.0002850589;0.003533908;0.003061346;0.01457312;0.01738368;0.005024341;0.001648682;0.002539335;0.00271937;0.001036333;0.001233876;0.002207056;0.001436763;0.0008122082;2.663113E-05;-0.001411854;0.009026978;0.006179038;0.01052312;0.008600651;0.009339282;0.001615306;0.003170863;0.003676526;0.002051348	6.339799;5.690732;4.933268;5.712407;4.770461;7.003334;0.3530153;3.77338;2.950454;12.30171;12.51799;3.271602;7.628104;6.696647;3.24932;5.722203;5.900833;6.19722;3.477509;1.449867;0.03765374;-1.746667;9.630366;6.721185;10.01794;7.669109;7.564928;1.198616;6.758343;6.993329;3.655033	147.111871510833;234.143500132698;397.206201594134;510.289310119257;623.373315301501;694.408539692496;807.497181788942;936.536526035971;1037.58467707239;1184.64157921075;1388.69563161025;1535.74339017346;216.132619212062;379.195057097129;836.904582051428;181.107351161664;209.102068240477;356.13649428904;413.15872830575;560.19475208882;707.263951582067;808.313068541133;937.345222805747;919.3375060…	31	0.5236534	0.2094595
20140904-PurClathDigest-1ug-03	6176	3575	0	AHMGMFTELAILYSK	15	0	2 Oxidation (M)	_AHM(ox)GM(ox)FTELAILYSK_		AHM(1)GM(1)FTELAILYSK		AHM(125.36)GM(125.36)FTELAILYSK	0	0	2	P49951;F1MPU0	2	HCD	FTMS	MSMS	1	0	872.42586	1742.8372	NaN	-5.4604248	47.41	3.0563E-07	125.36	121.98	125.36	1	1	0	0	0	-1	0	0	0	0	y1;y2;y3;y4;y5;y6;y7;y8;y9;y10;y12;y13;y2-H2O;y3-H2O;y4-H2O;y14(2+);a2;b2;b3;b4;b5;b6;b8;b8-H2O;b9;b10;b10-H2O;b11;b12;b8(2+);b10(2+)	209349.3;596136.9;497770.7;355513.8;143670.2;96324.8;53379.9;68337.2;52344.7;54052.9;33341.1;70784.3;126010.9;41642.8;20540.5;15459.1;297835;1014305;176109.2;17442.9;38093.9;48461.9;146329;22644.5;286830.5;362552.2;30548;161378.2;13517;98991.4;54772.1	0.000943371;0.001478563;0.002447463;0.003964238;0.003110865;0.004252128;0.003706077;0.003276036;0.02006101;0.008793866;-0.002099152;0.01629151;0.001660054;0.001970453;0.009053968;0.005950187;0.001106632;0.001250863;0.002139402;0.004111814;0.006122338;0.00636162;0.006871182;0.002623252;0.006643943;0.008628049;0.006401186;0.006371172;0.00547845;0.003953563;0.00694183	6.41261;6.314775;6.161701;7.768624;4.990374;6.123376;4.589604;3.498033;19.33465;7.423193;-1.511579;10.6083;7.680718;5.196402;18.39218;7.109783;6.11037;5.982069;6.007252;9.952207;10.92905;8.99477;7.330455;2.853405;6.324964;7.693539;5.801021;5.160711;4.065224;8.426594;12.36886	147.111860799608;234.143354017853;397.205713655835;510.28826086152;623.37317821421;694.409150739153;807.493760770894;936.536783907857;1037.56767741154;1184.64735846791;1388.71511443866;1535.7321230071;216.132607840625;379.195625979626;492.272606444895;836.901351234668;181.107280862344;209.102051253807;356.136561942902;413.156053254373;560.189441959436;707.257616593603;937.347378601246;919.3410618…	31	0.5295535	0.2183099
20140904-PurClathDigest-1ug-03	6241	3632	0	AHMGMFTELAILYSK	15	0	2 Oxidation (M)	_AHM(ox)GM(ox)FTELAILYSK_		AHM(1)GM(1)FTELAILYSK		AHM(134.02)GM(134.02)FTELAILYSK	0	0	2	P49951;F1MPU0	2	HCD	FTMS	MSMS	2	0	872.42586	1742.8372	NaN	-5.0014032	47.68	4.4837E-08	134.02	130.57	134.02	1	1	0	0	0	-1	0	0	0	0	y1;y2;y3;y4;y5;y6;y7;y8;y9;y10;y11;y12;y13;y2-H2O;y2-NH3;y3-H2O;a2;b2;b3;b4;b5;b6;b8;b8-H2O;b9;b10;b10-H2O;b11;b12;b8(2+);b9(2+)	147870;414799.3;344758;253639.1;132415;73763.6;43814.2;40685.8;52537.7;29724.8;8875.2;22339.6;11509.2;86844.7;11203.3;21577.8;221036.9;735226.2;126374;30895.2;22841.2;12336.1;101075.9;19494.1;85158.5;342541.9;12115.5;86598.3;35378.4;63602;116244.7	0.0008202538;0.001315535;0.002425247;0.003249282;0.006584303;0.004864454;0.0009574366;0.001016171;-0.007295173;0.006264655;-0.01624227;-0.008266521;0.02235069;0.001134617;0.0006584619;0.002006029;0.001175491;0.001272783;0.001946408;0.004977317;0.003020754;0.008314296;0.005296721;0.01174925;0.007213032;0.006265699;0.007087728;0.009628275;0.01539014;0.003202416;0.002879988	5.57571;5.618499;6.10577;6.367533;10.56244;7.005176;1.185685;1.085028;-7.030848;5.288191;-12.19657;-5.952613;14.55383;5.249619;3.032743;5.290223;6.490582;6.086898;5.465338;12.04709;5.392349;11.75571;5.650746;12.78021;6.866735;5.587045;6.423198;7.799017;11.42017;6.825595;5.47818	147.111983916814;234.143517045508;397.205735871909;510.288975817229;623.369704777208;694.40853841368;807.496509411191;936.539043773153;1037.59503359114;1184.64988767874;1331.70779382951;1388.72128180717;1535.72606382318;216.133133277536;217.117625017096;379.195590403588;181.107212003416;209.102029334105;356.136754937485;413.155187751543;560.192543543382;707.255663917835;937.34895306298;919.331935…	31	0.5306781	0.198718
20140904-PurClathDigest-1ug-03	6308	3691	0	AHMGMFTELAILYSK	15	0	2 Oxidation (M)	_AHM(ox)GM(ox)FTELAILYSK_		AHM(1)GM(1)FTELAILYSK		AHM(130.47)GM(130.47)FTELAILYSK	0	0	2	P49951;F1MPU0	2	HCD	FTMS	MSMS	5	0	872.42586	1742.8372	NaN	-3.6243382	47.966	1.5181E-07	130.47	127.09	130.47	1	1	0	0	0	-1	0	0	0	0	y1;y2;y3;y4;y5;y6;y7;y8;y9;y10;y12;y13;y2-H2O;y3-H2O;y4-H2O;a2;b2;b3;b4;b5;b6;b8;b8-H2O;b9;b10;b10-H2O;b11;b12	121628;351320.1;326716.7;221575.8;79835.7;62449;32411.5;42991.4;36308.6;45984.2;38973.2;40656.1;74826.3;21981.5;9633;168351.1;656769.4;95509.2;22805.1;31218.6;16118.3;182660.6;19762.5;164758.8;304624.3;6532.8;89983.1;14746.2	0.001065864;0.001455883;0.002419163;0.003410547;0.003418797;0.004992951;0.005735567;0.007686276;-0.004358977;0.01017672;0.01125535;0.008897807;0.001384213;0.00233495;0.0007634795;0.001066884;0.001283301;0.002120318;0.003936048;0.003792799;0.005978309;0.008138739;0.006109458;0.006056825;0.008774095;-0.003306602;0.002410432;0.02227662	7.245266;6.217913;6.090452;6.683563;5.484353;7.190223;7.102942;8.207165;-4.20105;8.590515;8.104946;5.793825;6.404452;6.157646;1.550902;5.890896;6.137202;5.953665;9.526779;6.770536;8.452798;8.682746;6.645501;5.766031;7.823768;-2.996554;1.952467;16.53033	147.11173830696;234.143376697465;397.205741956336;510.288814551919;623.372870282678;694.408409916179;807.491731280725;936.5323736685;1037.59209739466;1184.64597561494;1388.70175993305;1535.7395167079;216.13288368161;379.195261482544;492.280896933404;181.107320610365;209.102018815411;356.13658102711;413.15622902077;560.191771498503;707.25799990402;937.346111044919;919.337575638884;1050.43225693907…	28	0.5235276	0.175
20140904-PurClathDigest-1ug-03	6404	3775	0	AHMGMFTELAILYSK	15	0	2 Oxidation (M)	_AHM(ox)GM(ox)FTELAILYSK_		AHM(1)GM(1)FTELAILYSK		AHM(143.46)GM(143.46)FTELAILYSK	0	0	2	P49951;F1MPU0	2	HCD	FTMS	MSMS	5	0	872.42586	1742.8372	NaN	-5.1161586	48.354	3.171E-11	143.46	140.2	143.46	1	1	0	0	0	-1	0	0	0	0	y1;y2;y3;y4;y5;y6;y7;y8;y9;y10;y12;y2-H2O;y3-H2O;a2;b2;b3;b4;b5;b6;b8;b8-H2O;b9;b10;b10-H2O;b11;b12;b8(2+);b9(2+);b10(2+)	35246.1;90075.8;84653.1;56022.1;17153.7;16130;9944.3;9546.3;9798.4;9490.5;9716.5;18166.7;5865.4;40871.8;165335.5;27871.9;4364;8241.9;7793.5;22208.2;3796.5;21749.6;50173.4;2184;17879.9;3402.2;12628.5;23861.3;23502.3	0.0007154908;0.001338125;0.001848036;0.003409707;0.002248967;0.00446352;-0.001978456;0.009183609;0.004676761;0.008058053;0.0001831919;0.001411689;0.00351408;0.0009819163;0.00111711;0.002857971;0.002002096;0.004873809;0.009810268;0.002905597;0.0111997;0.008394009;0.008656834;0.008175489;0.006007826;-0.007911609;0.002075263;0.001179924;0.005394214	4.863576;5.714976;4.652584;6.681916;3.607733;6.427798;-2.450101;9.805986;4.50736;6.802064;0.1319149;6.531581;9.267234;5.421735;5.34241;8.024947;4.845835;8.700268;13.87092;3.099795;12.18243;7.991022;7.719207;7.408981;4.866396;-5.870664;4.423182;2.24439;9.611313	147.112088679766;234.143494455942;397.206313083145;510.288815392057;623.374040112829;694.408939347015;807.499445303289;936.530876334963;1037.58306165732;1184.64809428191;1388.71283209427;216.132856204925;379.194082352205;181.107405578397;209.102185007094;356.135843373763;413.158162972467;560.190690487872;707.254167945293;937.351344186813;919.332485393731;1050.42991975519;1121.46677071713;1103.456…	29	0.5224337	0.2071429
20140904-PurClathDigest-1ug-03	6582	3931	0	AHMGMFTELAILYSK	15	0	2 Oxidation (M)	_AHM(ox)GM(ox)FTELAILYSK_		AHM(1)GM(1)FTELAILYSK		AHM(59.86)GM(59.86)FTELAILYSK	0	0	2	P49951;F1MPU0	3	HCD	FTMS	MSMS	7	0	581.953	1742.8372	NaN	-7.3977639	49.112	0.034934	59.864	55.887	59.864	1	1	0	0	0	-1	0	0	0	0	y1;y2;y3;y4;y5;y6;y7;y8;y2-H2O;y3-H2O;y4-H2O;a2;b2;b3;b4;b5;b6;b7;b7-H2O;b8;b8-H2O	15816.6;49017.2;55764.9;43084.1;30135.1;43987.5;20139.4;6060.2;9344.9;7265.4;2169.6;2476.9;20625.8;9080.6;9365.7;35408.5;7604;11828.9;5433.4;17267.1;4690.5	0.0006852245;0.00138344;0.001948151;0.004409128;0.001485873;0.002522211;0.001374382;0.001661621;0.000774552;0.001033837;0.001311459;0.001266614;0.00101425;0.0003720272;0.001373489;0.003729501;0.005918618;0.0001208464;0.002610045;0.00540764;-0.01242161	4.657838;5.908513;4.904634;8.640472;2.383595;3.632159;1.702029;1.774215;3.583674;2.726389;2.664049;6.993731;4.850496;1.044614;3.324361;6.657542;8.3684;0.1495047;3.302606;5.76908;-13.5112	147.112118946102;234.143449140895;397.206212967682;510.287815971327;623.37480320676;694.410880656539;807.496092465958;936.538398323312;216.133493342207;379.196562595299;492.28034895391;181.107120880337;209.10228786708;356.138329317874;413.158791579782;560.19183479639;707.258059594797;808.311535840909;790.298481956434;937.348842143348;919.35610670632	21	0.2772831	0.1891892
20140904-PurClathDigest-1ug-03	6670	4008	0	AHMGMFTELAILYSK	15	0	2 Oxidation (M)	_AHM(ox)GM(ox)FTELAILYSK_		AHM(1)GM(1)FTELAILYSK		AHM(85.84)GM(85.84)FTELAILYSK	0	0	2	P49951;F1MPU0	3	HCD	FTMS	MSMS	7	0	581.953	1742.8372	NaN	-4.4715009	49.474	0.00042327	85.837	83.535	85.837	1	1	0	0	0	-1	0	0	0	0	y1;y2;y3;y4;y5;y6;y7;y8;y2-H2O;y3-H2O;y4-H2O;y8-H2O;a2;b2;b3;b4;b5;b6;b8;b8-H2O;b10;b7(2+);b8(2+)	16974.3;41165.7;47454.6;38606.6;24776.2;35736.3;14634.2;5702.7;5855.6;4510.3;2076.8;2184.6;3814.9;24392.8;5394.6;13216.9;22938.5;9330.5;15530.8;4495;5373;8412.5;4414.4	0.0009131514;0.001091006;0.002249084;0.003518529;0.00328629;0.004723093;0.01086105;-0.003386336;0.001098665;0.003583389;0.00182492;0.009213841;0.001344707;0.001296035;0.004492796;0.002800488;0.003354099;0.005336096;0.0114758;0.01534486;0.01014633;0.003501539;0.005871178	6.20719;4.659556;5.662261;6.895174;5.271787;6.801603;13.45045;-3.615781;5.083278;9.450016;3.707078;10.03118;7.424932;6.1981;12.61546;6.778259;5.987407;7.544758;12.24291;16.69138;9.047389;8.653127;12.51384	147.111891019251;234.143741574466;397.205912035191;510.288706569628;623.373002790014;694.408679774714;807.486605792498;936.543446280177;216.13316922916;379.194013043181;492.279835493112;918.52028141729;181.107042787276;209.102006081635;356.134208548654;413.157364581092;560.192210198112;707.25864211783;937.342773983846;919.328340237694;1121.46528121898;404.655965037524;469.174891947238	23	0.5076305	0.2473118
20140904-PurClathDigest-1ug-01	7444	4455	0	AHMGMFTELAILYSK	15	0	Oxidation (M)	_AHMGM(ox)FTELAILYSK_		AHM(0.132)GM(0.868)FTELAILYSK		AHM(-8.17)GM(8.17)FTELAILYSK	0	0	1	P49951;F1MPU0	3	HCD	FTMS	MULTI-MSMS	5	0	576.62136	1726.8422	-0.31061	-3.230449	49.031	0.0049885	73.386	72.137	8.1678	0.86769	2	0	0	0	-1	0	0	0	0	y1;y2;y3;y4;y5;y6;y7;y8;y2-H2O;y3-H2O;a2;b2;b3;b5;b6;b8;b8-H2O;b7(2+)	32868.4;84107.1;116664.2;86090.8;49863.3;62949.8;23505.6;19309.3;15436.5;12252.7;13251.9;60128.7;29138.5;59000.3;15655.5;36286.3;10471;12276.5	0.0007152211;0.001354434;0.005430801;0.002561733;0.003855294;0.007187436;0.0008794892;0.009644634;0.001982189;0.004204547;0.001721497;0.001511086;0.0005823597;0.003215572;0.01127104;0.007106685;0.01503356;0.004083862	4.861742;5.784632;13.67262;5.020155;6.184576;10.35048;1.089155;10.29826;9.171186;11.08813;9.505432;7.226558;1.712101;5.908834;16.30512;7.71332;16.64231;10.29568	147.112088949487;234.14347814669;397.202730318003;510.289663365992;623.372433785357;694.406215431677;807.496587358637;936.530415309719;216.132285704778;379.193391885688;181.106665997664;209.101791030716;340.1432043633;544.197434102599;691.257792550332;921.352228476727;903.333736912305;396.657925404143	18	0.4605918	0.2068966
20140904-PurClathDigest-1ug-01	7445	4456	0	AHMGMFTELAILYSK	15	0	Oxidation (M)	_AHMGM(ox)FTELAILYSK_		AHM(0.116)GM(0.884)FTELAILYSK		AHM(-8.82)GM(8.82)FTELAILYSK	0	0	1	P49951;F1MPU0	2	HCD	FTMS	MULTI-MSMS	6	0	864.4284	1726.8422	0.26435	-1.5068019	49.034	0.00043016	117.48	114.58	8.8177	0.88395	2	0	0	0	-1	0	0	0	0	y1;y2;y3;y4;y5;y6;y8;y9;y10;y13;y2-H2O;y3-H2O;y14(2+);a2;b2;b3;b6;b8;b8-H2O;b9;b11;b7(2+);b8(2+);b9(2+);b10(2+)	56192.3;116427.1;112027.4;74924;32327.4;22499.2;8030.7;12827.5;5213.5;6431;26675.2;9797.8;4538.4;66834;365845;75446.6;9645;47354.5;9999.8;49463.8;45852.6;4047.2;12234.6;22174.2;12773.9	0.0008377919;0.00112278;0.004324005;0.002442216;0.005331212;0.002006122;0.001729483;-0.0004813999;0.01723675;-0.003766011;0.001558967;0.007436389;0.0005441605;0.001060889;0.001152469;0.001854868;0.007199092;0.004922904;-0.001339731;0.005308967;0.00754198;0.003993939;0.004015596;0.003043198;0.002838848	5.694927;4.795261;10.88611;4.785939;8.552231;2.888953;1.846677;-0.4639605;14.55021;-2.478034;7.213008;19.61124;0.6564778;5.857789;5.511513;5.453219;10.41442;5.343116;-1.48307;5.132223;6.189271;10.06897;8.707233;5.87805;5.131305	147.111966378708;234.143709800393;397.203837114353;510.289782883635;623.370957867182;694.41139674545;936.538330460569;1037.58821981801;1184.63891558584;1519.75726590307;216.132708927141;379.190160043834;828.909299950146;181.107326606123;209.102149647455;340.141931854605;691.261864499464;921.354412257702;903.350110206481;1034.43809017468;1218.55703493015;396.658015327107;461.179290218344;517.72229…	25	0.5844244	0.2118644
20140904-PurClathDigest-1ug-01	7772	4742	0	AHMGMFTELAILYSK	15	0	Oxidation (M)	_AHM(ox)GMFTELAILYSK_		AHM(0.995)GM(0.005)FTELAILYSK		AHM(22.83)GM(-22.83)FTELAILYSK	0	0	1	P49951;F1MPU0	2	HCD	FTMS	MULTI-MSMS	5	0	864.4284	1726.8422	-0.013983	-1.2751652	50.281	0.00017322	115.1	113.42	22.831	0.99482	2	0	0	0	-1	0	0	0	0	y1;y2;y3;y4;y5;y6;y7;y8;y9;y10;y12;y2-H2O;y3-H2O;a2;b2;b3;b4;b6;b7;b7-H2O;b8;b9;b10;b11;b12;b8(2+);b9(2+);b10(2+)	35460.9;85460;71798.3;52914.8;24375.7;12898.7;9617.8;6418.7;6583.3;11690.8;27194.8;13453.7;5481.7;58243;200285;25000.3;17202.2;13991.7;6143;8490;37935.3;31009.8;59124.2;18931.3;4231.5;13884.3;19960.4;7927.6	0.0007395297;0.001078598;0.002080863;0.002547508;0.004257152;0.005006298;-0.002932416;0.008495302;-0.004518752;0.009757114;0.008590469;0.0008450344;0.002529507;0.0009571926;0.001228057;0.001304662;0.003694903;-0.009440748;0.007785463;0.000465609;0.004370196;0.007204901;0.007166197;0.006663799;0.01239169;0.003247884;0.001713961;0.0004682618	5.026982;4.606563;5.23875;4.992279;6.829231;7.209443;-3.631473;9.071026;-4.355037;8.236309;6.258039;3.909781;6.670728;5.28522;5.873004;3.663368;8.943108;-13.65694;9.826297;0.6013245;4.743227;6.965052;6.482469;5.468594;9.305611;7.042551;3.310571;0.8463938	147.112064640941;234.143753982674;397.206080255559;510.289677591203;623.372031927966;694.408396569262;807.500399263585;936.531564642028;1037.59225717054;1184.64639522041;1372.70951019525;216.133422859817;379.195066925386;181.107430302083;209.102074059343;356.137396682834;413.15647016572;691.278504338938;792.308956602517;774.305711769872;921.354964965352;1034.43619424014;1105.4733467331;1218.55791…	28	0.4001964	0.1772152
20140904-PurClathDigest-1ug-01	7834	4796	0	AHMGMFTELAILYSK	15	0	Oxidation (M)	_AHM(ox)GMFTELAILYSK_		AHM(0.996)GM(0.004)FTELAILYSK		AHM(23.97)GM(-23.97)FTELAILYSK	0	0	1	P49951;F1MPU0	2	HCD	FTMS	MULTI-MSMS	3	0	864.4284	1726.8422	-0.013983	-1.7384386	50.521	6.7584E-05	125.73	120.76	23.974	0.99601	2	0	0	0	-1	0	0	0	0	y1;y2;y3;y4;y5;y6;y7;y8;y9;y12;y13;y2-H2O;y3-H2O;y14(2+);a2;b2;b3;b4;b5;b6;b8;b9;b10;b10-H2O;b11;b12;b8(2+);b9(2+);b10(2+)	64990.5;175293;162414;122994.6;50158.2;26518.6;23049.9;8179.5;20091.1;41424.3;11923.4;36352.4;14375.2;16346.4;104214.5;392387.8;59640.1;38279.8;15782;9839.5;89194.8;61751.9;144662;5263.2;57052.4;10001.5;15447.8;51414.6;18825.2	0.000902288;0.001430298;0.003499503;0.00325437;0.002056243;0.00471752;0.003957401;-0.0006111444;0.001267617;0.007552466;-0.00226151;0.001444051;0.003444982;0.007406211;0.001040912;0.001251835;0.002825407;0.002901342;0.009669566;-0.0003557424;0.002122174;0.007686492;0.004982577;0.002203255;0.004175274;0.01639089;0.004191711;0.006607135;0.002114312	6.133344;6.10864;8.810328;6.377504;3.298569;6.793579;4.900845;-0.6525551;1.221698;5.501863;-1.488075;6.681314;9.085007;8.934961;5.747489;5.98672;7.933507;7.022367;17.7687;-0.5146219;2.303313;7.430614;4.50718;2.026042;3.426399;12.30887;9.089117;12.76202;3.821678	147.111901882627;234.143402282679;397.204661615232;510.28897072902;623.374232836509;694.408685347389;807.493509447168;936.540671088438;1037.58647080121;1372.71054819762;1519.75576140284;216.132823843091;379.194151450875;828.902437899742;181.107346582226;209.10205028134;356.135875938429;413.157263727013;544.190980109416;691.269419333494;921.357212987798;1034.43571264986;1105.4755303522;1087.467744…	29	0.5132403	0.1883117
20140904-PurClathDigest-1ug-01	7779	4748	0	AHMGMFTELAILYSK	15	0	Oxidation (M)	_AHM(ox)GMFTELAILYSK_		AHM(0.985)GM(0.015)FTELAILYSK		AHM(18.11)GM(-18.11)FTELAILYSK	0	0	1	P49951;F1MPU0	3	HCD	FTMS	MULTI-MSMS	4	0	576.62136	1726.8422	0.86818	-2.882994	50.31	0.00026203	105.19	103.57	18.108	0.98478	2	0	0	0	-1	0	0	0	0	y1;y2;y3;y4;y5;y6;y7;y8;y2-H2O;y3-H2O;y8-H2O;a2;b2;b3;b4;b5;b6;b7;b7-H2O;b8;b8-H2O;b9;b10	37516.1;106423.8;98890.6;81088.7;54934.2;81966.1;21843.9;5352;19521.5;10179.8;6042.1;6999.6;47490.4;13559.3;18794.6;60948.1;36734.9;13016.6;43748.4;61967.1;25625.9;11572;9429.9	0.001145089;0.001395412;0.001689833;0.002896609;0.004485465;0.004388529;0.003632477;-0.005390247;0.002615768;0.002897518;0.002760758;1.172192E-05;0.001005981;6.295354E-05;0.002183437;0.00621432;0.006514868;0.0008814875;0.0006597853;0.002197782;0.007005033;0.01601857;0.007423641	7.78381;5.959646;4.254294;5.676405;7.195489;6.319805;4.498457;-5.755457;12.10266;7.641242;3.005637;0.06472323;4.810952;0.1767669;5.28475;11.4193;9.424593;1.112546;0.8520995;2.385375;7.754576;15.48544;6.715352	147.111659081481;234.143437168462;397.206471285418;510.289328490483;623.371803614441;694.409014338278;807.493834371173;936.545450190742;216.131652126443;379.19469891428;918.52673449985;181.108375772781;209.102296135842;356.138638391563;413.15798163197;544.194435354867;691.26254872283;792.315860577685;774.305517593522;921.357137379377;903.341765442273;1034.42738057493;1105.47308928835	23	0.5212274	0.2211538
20140904-PurClathDigest-1ug-02	6892	4098	0	AHMGMFTELAILYSK	15	0	Oxidation (M)	_AHMGM(ox)FTELAILYSK_		AHM(0.353)GM(0.647)FTELAILYSK		AHM(-2.63)GM(2.63)FTELAILYSK	0	0	1	P49951;F1MPU0	3	HCD	FTMS	MULTI-MSMS	3	1	576.62136	1726.8422	-0.70509	-3.4041765	49.26	0.023108	54.402	53.472	2.6316	0.64702	2	0	0	0	-1	0	0	0	0	y1;y2;y3;y4;y5;y6;y7;y8;y2-H2O;a2;b2;b3;b5;b6;b8;b10;b7(2+)	11755.8;43542.4;80400.6;35340.9;16070.6;40514.7;17348.8;9438.3;5001.5;9848.7;31620.2;12013.1;46135.2;12805.1;28580.4;6052.3;6594.2	0.001139476;0.001480522;0.006484338;0.003096309;0.00206941;0.003961766;0.00187976;-0.003477948;0.001887158;0.002351261;0.001716768;0.001611757;0.003844823;0.001075061;0.01045942;-0.0006971878;0.0009675868	7.745651;6.323142;16.32505;6.067754;3.319692;5.70523;2.327889;-3.7136;8.731492;12.98279;8.210209;4.73848;7.065134;1.555201;11.35229;-0.6306646;2.439329	147.111664695026;234.143352059022;397.201676781372;510.289128790115;623.374219669117;694.409441101768;807.495587088025;936.543537891881;216.132380735996;181.106036233275;209.101585349105;340.142174966059;544.196804852003;691.267988530163;921.348875746136;1105.48121011742;396.661041679118	17	0.4498257	0.1910112
20140904-PurClathDigest-1ug-02	6902	4107	0	AHMGMFTELAILYSK	15	0	Oxidation (M)	_AHMGM(ox)FTELAILYSK_		AHM(0.03)GM(0.97)FTELAILYSK		AHM(-15.09)GM(15.09)FTELAILYSK	0	0	1	P49951;F1MPU0	2	HCD	FTMS	MULTI-MSMS	5	0	864.4284	1726.8422	0.52134	-1.0435286	49.3	1.4181E-07	151.22	148.31	15.087	0.96993	2	0	0	0	-1	0	0	0	0	y1;y2;y3;y4;y5;y6;y7;y8;y9;y10;y12;y13;y2-H2O;y3-H2O;y9-H2O;a2;b2;b3;b6;b7;b7-H2O;b8;b8-H2O;b9;b10;b10-H2O;b11;b12;b8(2+);b9(2+);b10(2+)	25694;64108.1;63002;34247.3;15153.9;12541.8;7259.2;4698.4;3311.9;2118.7;4660.1;5998;12587.5;4859.3;2644.1;38177.7;160947.2;40609.1;3551.2;3834;3149.7;25877.9;3387.4;24570.3;53340.1;2211.3;26534.6;6805.1;4338.2;9374.2;8815.1	0.001122293;0.00148405;0.004786718;0.002453723;0.002462141;0.003587822;0.0067051;-0.004377435;0.003556168;0.01053412;0.0133287;-0.01330897;0.001085091;0.001172904;0.001145181;0.001094238;0.001281653;0.002456154;0.01360055;0.006118529;0.01445443;0.00425318;0.003887997;0.005682525;0.005501596;-0.001813389;0.01078838;0.007130159;0.001266571;0.0005633001;0.005027892	7.628851;6.33821;12.05105;4.80849;3.949703;5.166721;8.303625;-4.674028;3.427354;8.892213;9.597975;-8.757243;5.020473;3.09313;1.123193;6.041931;6.129318;7.220981;19.67514;7.722387;18.66793;4.616223;4.304;5.493346;4.97668;-1.667528;8.853433;5.354414;2.746359;1.08803;9.088103	147.111681877509;234.143348530904;397.203374400534;510.289771375775;623.373826938214;694.409815045584;807.490761747811;936.544437379248;1037.58418224999;1184.64561821387;1388.69968658132;1519.76680885991;216.13318280355;379.196423528758;1019.57602855081;181.107293257049;209.102020464024;340.141330569129;691.255463043173;792.310623536305;774.291722952621;921.355081981247;903.344882478347;1034.4377…	31	0.6427943	0.2695652
20140904-PurClathDigest-1ug-02	7230	4394	0	AHMGMFTELAILYSK	15	0	Oxidation (M)	_AHM(ox)GMFTELAILYSK_		AHM(0.997)GM(0.003)FTELAILYSK		AHM(25.58)GM(-25.58)FTELAILYSK	0	0	1	P49951;F1MPU0	2	HCD	FTMS	MULTI-MSMS	5	0	864.4284	1726.8422	-0.093961	-1.1593469	50.669	0.00011327	130.72	129.16	25.58	0.99724	2	0	0	0	-1	0	0	0	0	y1;y2;y3;y4;y5;y6;y7;y8;y9;y10;y12;y13;y2-H2O;y3-H2O;y4-H2O;a2;b2;b3;b4;b6;b8;b8-H2O;b9;b10;b10-H2O;b11;b12;b8(2+);b9(2+);b10(2+)	51983.1;126713.1;103625.6;73680.7;35687.6;24919.9;15210.6;7931.3;21777.1;16865.8;35065.2;13437;20969.2;11628;5270.9;88850.1;306889.9;44632.1;20479.6;14966.5;61420.4;9161.9;48731.2;98035.7;4226.8;30287.5;7978.7;11846.7;35132.1;19760.4	0.0008688007;0.001166351;0.002253816;0.001200018;0.00384322;0.001786381;0.002371598;0.01401002;0.003401883;0.008890512;-2.233159E-05;0.005443353;0.001349999;0.0005904747;0.0005157423;0.0008741866;0.001083947;0.001382631;0.003812083;0.00265549;0.005806833;0.009114336;0.005935078;0.005001973;0.008124487;0.004652908;-0.00463834;0.004033134;0.002532758;0.002375997	5.905712;4.981349;5.674175;2.351634;6.165206;2.57251;2.936981;14.95956;3.278657;7.504776;-0.01626815;3.581747;6.246153;1.557171;1.047658;4.826893;5.183813;3.882296;9.226732;3.841486;6.302502;10.0896;5.737494;4.524725;7.471056;3.818366;-3.483144;8.745262;4.892112;4.294683	147.111935369868;234.143666229117;397.205907302937;510.291025081725;623.372445859765;694.411616486339;807.49509524969;936.526049927234;1037.58433653486;1184.64726182222;1372.71812299569;1519.74805653974;216.13291789493;379.197005957807;492.281144670635;181.107513308143;209.102218170126;356.137318714576;413.15635298565;691.266408100856;921.353528328769;903.339656139341;1034.43746406344;1105.475510…	30	0.5211965	0.1807229
20140904-PurClathDigest-1ug-02	7232	4396	0	AHMGMFTELAILYSK	15	0	Oxidation (M)	_AHM(ox)GMFTELAILYSK_		AHM(0.989)GM(0.011)FTELAILYSK		AHM(19.38)GM(-19.38)FTELAILYSK	0	0	1	P49951;F1MPU0	3	HCD	FTMS	MULTI-MSMS	7	1	576.62136	1726.8422	0.29137	-2.1880839	50.676	0.00024214	106.32	103.66	19.379	0.98859	2	0	0	0	-1	0	0	0	0	y1;y2;y3;y4;y5;y6;y7;y2-H2O;y3-H2O;a2;b2;b3;b4;b5;b6;b7;b7-H2O;b8;b8-H2O;b9;b7(2+);b8(2+)	41595.2;114100.7;129550.5;94986.3;79054.7;104007.1;48751.6;25337.3;15353.6;9276.3;51336.2;24102.6;25573.9;57566.1;51004.5;16023.2;44381.2;64615.9;20809.8;8366.5;4743.3;3937.6	0.001255266;0.001527867;0.002129714;0.003884133;0.00482753;0.00484243;0.006617339;0.001834065;0.003265986;0.0002896469;0.000819671;0.001944668;0.003658134;0.003093277;0.003332989;0.006069204;0.006047752;0.009358658;0.003996464;-0.001298962;0.006955627;0.002666155	8.532746;6.52535;5.361737;7.611643;7.744227;6.97346;8.19494;8.485839;8.612962;1.599304;3.919949;5.460452;8.854114;5.684106;4.821574;7.660131;7.810605;10.15755;4.424074;-1.255709;17.53571;5.781151	147.111548905086;234.143304713506;397.206031404596;510.288340966548;623.371461549539;694.408560437232;807.490849509048;216.132433829244;379.194330446245;181.108097847829;209.102482445839;356.136756677513;413.156506934262;544.197556398088;691.265730602114;792.310672861296;774.300129626827;921.34997650251;903.344774010991;1034.44469810355;396.655053638888;461.180639659212	22	0.5758891	0.2156863
20140904-PurClathDigest-1ug-03	6673	4010	0	AHMGMFTELAILYSK	15	0	Oxidation (M)	_AHMGM(ox)FTELAILYSK_		AHM(0.135)GM(0.865)FTELAILYSK		AHM(-8.08)GM(8.08)FTELAILYSK	0	0	1	P49951;F1MPU0	3	HCD	FTMS	MULTI-MSMS	2	1	576.62136	1726.8422	-0.77854	-2.1880839	49.49	0.0052561	72.321	70.935	8.0775	0.86529	2	0	0	0	-1	0	0	0	0	y1;y2;y3;y4;y5;y6;y7;y8;y2-H2O;y3-H2O;a2;b2;b3;b5;b6;b7;b7-H2O;b8;b8-H2O;b7(2+)	15155.3;42637.5;84746.5;42659.8;27141.5;43364;19029.3;3281.9;9090.5;4700.4;6172.5;41425.5;15375.9;35043.1;12556;3569.1;14403;16246.5;6437.3;4142.6	0.0008168436;0.00168515;0.006465331;0.003695973;0.002468054;0.004954071;0.005880452;0.01741051;0.002904564;0.0006753748;0.001084848;0.000917136;0.001829162;0.004749407;0.002053682;0.01245152;0.01153787;0.01819924;-0.004885868;0.0008098059	5.552529;7.197091;16.2772;7.242908;3.959188;7.134233;7.28237;18.59059;13.43888;1.781066;5.990084;4.386062;5.377643;8.727384;2.970895;15.71558;14.90114;19.75299;-5.408588;2.041556	147.111987326933;234.143147431027;397.201695788233;510.288529125968;623.373821025386;694.408448796341;807.491586395739;936.522649437363;216.131363330494;379.196921057747;181.107302646769;209.102384980756;340.141957560894;544.19590026847;691.267009909325;792.304290544215;774.294639508771;921.341135917586;903.353656343219;396.661199459987	20	0.4621727	0.1980198
20140904-PurClathDigest-1ug-03	6685	4021	0	AHMGMFTELAILYSK	15	0	Oxidation (M)	_AHMGM(ox)FTELAILYSK_		AHM(0.019)GM(0.981)FTELAILYSK		AHM(-17.07)GM(17.07)FTELAILYSK	0	0	1	P49951;F1MPU0	2	HCD	FTMS	MULTI-MSMS	6	0	864.4284	1726.8422	0.43447	0.46210984	49.544	1.6274E-07	158.93	154.86	17.074	0.98076	2	0	0	0	-1	0	0	0	0	y1;y2;y3;y4;y5;y6;y7;y8;y9;y10;y12;y13;y2-H2O;y2-NH3;y3-H2O;y4-H2O;y14(2+);a2;b2;b3;b5;b6;b7;b7-H2O;b8;b8-H2O;b9;b9-H2O;b10;b10-H2O;b11;b11-H2O;b12;b7(2+);b8(2+)	32407.8;93630.2;89744.2;56164.5;23891.2;15931.6;7955.1;8011.2;7268.3;6553.1;6119.9;10570.1;20526.6;1325.4;6634.3;2127.6;2964.4;56906.9;240494.8;68518.9;9024.6;7255.5;5142.2;4549.5;44314;6852.4;63979.8;8514.4;107164.8;7897.1;45914.6;2641.9;7600.8;2157.2;6553.9	0.0007681772;0.0011577;0.00433156;0.002730196;0.004038997;0.005029595;0.002569917;0.01183702;0.005954455;0.001568223;0.01776107;0.003775085;0.001297858;0.0007610163;0.002708477;-0.002050375;0.008544208;0.0008958275;0.001107598;0.002013492;0.009443544;0.008568237;0.006688567;0.001596842;0.005498286;0.01016552;0.005147702;0.005040472;0.006738581;0.01958935;0.007196501;0.00413217;0.003802924;0.00500…	5.221715;4.944399;10.90513;5.350289;6.47927;7.242992;3.18258;12.63926;5.738781;1.323781;12.78975;2.484018;6.004904;3.50509;7.142703;-4.165026;10.30787;4.946385;5.29692;5.919568;17.35336;12.39509;8.441856;2.062292;5.967617;11.25327;4.976326;4.959007;6.09565;18.01401;5.905755;3.441898;2.855809;12.60611;13.11825	147.112035993393;234.143674880722;397.203829558931;510.28949490315;623.372250082168;694.408373272678;807.494896931049;936.528222921762;1037.58178396322;1184.65458411153;1388.69525421789;1519.74972480699;216.132970036394;217.117522462658;379.194887955882;492.283710787544;828.901299903026;181.107491667239;209.102194519198;340.141773230527;544.191206130598;691.260495354727;792.310053497635;774.30458…	35	0.5937446	0.1902174
20140904-PurClathDigest-1ug-03	6997	4294	0	AHMGMFTELAILYSK	15	0	Oxidation (M)	_AHM(ox)GMFTELAILYSK_		AHM(0.987)GM(0.013)FTELAILYSK		AHM(18.72)GM(-18.72)FTELAILYSK	0	0	1	P49951;F1MPU0	3	HCD	FTMS	MULTI-MSMS	6	0	576.62136	1726.8422	1.5143	-1.3194464	50.832	9.4877E-05	114.7	112.04	18.724	0.98676	2	0	0	0	-1	0	0	0	0	y1;y2;y3;y4;y5;y6;y7;y8;y2-H2O;y3-H2O;y4-H2O;y6-H2O;a2;b2;b3;b4;b5;b6;b7;b7-H2O;b8;b8-H2O;b9;b10;b7(2+)	32530.5;91473.1;112352.1;87293.9;74151;98413.8;34331.4;8675.9;19585.7;9356.3;5604.8;1975.4;8084.2;49527.3;23757.8;30867.5;54228.8;35681.4;13518.3;38844.6;47276;20832.2;6563.8;12028.4;6081.2	0.0008005903;0.001178731;0.002260427;0.00333504;0.003141532;0.004182016;0.002894108;-0.004037853;0.001288501;0.0008415425;-0.0006759567;0.002544701;0.0005848638;0.0009763656;0.001703509;0.001640857;0.004658351;0.005224528;0.002995473;0.003615384;0.002544823;0.004897707;-0.001339218;0.005001968;0.005191176	5.442046;5.03422;5.690819;6.535592;5.03957;6.022408;3.584059;-4.31144;5.961614;2.219277;-1.373108;3.762123;3.229368;4.66932;4.783296;3.971494;8.560061;7.557936;3.780665;4.669214;2.762038;5.421752;-1.294625;4.524721;13.08732	147.112003580296;234.143653849807;397.205900691779;510.288890059426;623.373147547155;694.409220851504;807.494572739522;936.544097797557;216.132979392859;379.196754889992;492.282336369544;676.400293480306;181.107802630908;209.102325751191;356.136997836558;413.158524212026;544.195991324012;691.26383906309;792.313746592179;774.302561994506;921.356790338676;903.343872768479;1034.44473835932;1105.4755…	25	0.5498662	0.2016129
20140904-PurClathDigest-1ug-03	7009	4304	0	AHMGMFTELAILYSK	15	0	Oxidation (M)	_AHM(ox)GMFTELAILYSK_		AHM(0.999)GM(0.001)FTELAILYSK		AHM(31.74)GM(-31.74)FTELAILYSK	0	0	1	P49951;F1MPU0	2	HCD	FTMS	MULTI-MSMS	2	0	864.4284	1726.8422	0.94931	-0.5802552	50.884	9.3689E-05	134.37	129.4	31.744	0.99933	2	0	0	0	-1	0	0	0	0	y1;y2;y3;y4;y5;y6;y7;y8;y9;y10;y12;y13;y2-H2O;y3-H2O;y12-H2O;a2;b2;b3;b4;b6;b7;b7-H2O;b8;b8-H2O;b9;b10;b10-H2O;b11;b8(2+);b9(2+);b10(2+)	55567.8;148702.4;141055.7;92779.2;42467.6;33993.1;15782.8;9926.4;15474.2;22047.4;30630.7;9873.3;23667.9;9956.3;6350.1;101884.1;331556.5;54805.6;17799;14169.1;9099.8;8757.7;65604.9;10066.9;60106.5;110796.7;5065.2;44333.2;27970.5;40220.9;17331.4	0.0009531807;0.001226526;0.002402134;0.00280077;0.003878837;0.003812061;-7.044465E-05;0.01243881;0.01116459;-0.005456446;0.01195453;-0.01097665;0.0005937524;-0.0009841102;0.0002575952;0.001052504;0.00108466;0.001941165;0.002401517;-0.001239;0.0009202259;0.009142923;0.003642148;-0.001560783;0.00825495;0.005520584;-0.003043774;0.001961818;0.003286403;0.002500826;0.001034377	6.479292;5.238348;6.047581;5.488591;6.222344;5.489644;-0.08723822;13.28184;10.76026;-4.605911;8.708735;-7.222602;2.747154;-2.595237;0.1901482;5.811494;5.187223;5.450617;5.812592;-1.792353;1.161438;11.80803;3.953031;-1.727771;7.980152;4.993857;-2.798942;1.609945;7.126073;4.830434;1.869661	147.111850989939;234.143606054761;397.205758984785;510.289424329146;623.372410242092;694.409590806179;807.497537292451;936.527621135425;1037.57657382766;1184.66160878022;1372.70614612949;1519.76447654699;216.133674141787;379.198580542682;1354.7072783826;181.107334990567;209.102217456934;356.136760180117;413.157763551115;691.270302591387;792.315821839292;774.297034455579;921.355693013717;903.35033…	31	0.5307892	0.2066667
20140904-PurClathDigest-1ug-01	5426	2689	0	AHTMTDDVTFWK	12	0	Oxidation (M)	_AHTM(ox)TDDVTFWK_		AHTM(1)TDDVTFWK		AHTM(196.15)TDDVTFWK	0	0	1	P49951;F1MPU0	2	HCD	FTMS	MULTI-MSMS	3	0	734.33228	1466.65	-1.611	-4.6144532	41.447	8.0824E-07	196.15	188.62	196.15	1	1	0	0	0	-1	0	0	0	0	y1;y2;y3;y4;y5;y6;y7;y8;y9;y10;y11;y2-NH3;y4-H2O;y9-H2O;y10-H2O;y11-H2O;a2;b2;b3;b3-H2O;b4;b4-H2O;b5;b5-H2O;b6;b6-H2O;b7;b7-H2O;b8;b8-H2O;b9;b9-H2O;b10;b10-H2O;b11	1838210;3933043;1554135;1645223;1009859;454733;488022.9;691801.4;437408.3;901251.2;438006;830756.4;67987.7;30897.8;177534.8;377653.4;2497829;8265109;1806913;498345.4;335305.4;181804.2;129678.3;90744.3;367999.2;164718.3;1555950;591855.9;567683.2;528388.8;813438.5;1661906;346121.2;627826.8;36726.4	0.0005470857;0.001216432;0.001695851;0.001917586;0.009027144;0.0002375366;-0.003618223;0.003851667;0.005006425;0.005136228;0.005760183;0.0005945463;0.002698427;0.01033207;0.004480114;0.00382418;0.0005646707;0.0007193759;0.001039184;0.001198129;0.003445592;0.002256953;0.0007917521;0.0007620039;-0.0004997954;0.0001731717;0.002812921;0.003421911;0.003987357;0.001126535;0.004881096;0.00305886;0.00397…	3.718831;3.650856;3.53112;3.298753;13.26804;0.2986367;-3.974174;3.807973;4.32144;4.077808;4.124391;1.880494;4.790433;9.059302;3.608496;2.773948;3.11787;3.440301;3.350585;4.101228;7.536572;5.139091;1.418318;1.410537;-0.7423496;0.2642834;3.568406;4.442459;4.493545;1.295844;4.938385;3.152195;3.504388;4.000473;18.40459	147.112257084957;333.190900692105;480.258835188889;581.306291928658;680.36759628662;795.403328925962;910.434127717716;1011.4743363021;1158.50858077184;1259.55612944353;1396.61441735056;316.16497347636;563.294946401593;1140.49269044185;1241.54622087041;1378.60578866681;181.107822824053;209.102582740928;310.149941407337;292.139217775147;457.182934227144;439.173558180125;558.233266541214;540.2227316…	35	0.4802889	0.1785714
20140904-PurClathDigest-1ug-01	5488	2743	0	AHTMTDDVTFWK	12	0	Oxidation (M)	_AHTM(ox)TDDVTFWK_		AHTM(1)TDDVTFWK		AHTM(182.41)TDDVTFWK	0	0	1	P49951;F1MPU0	2	HCD	FTMS	MULTI-MSMS	1	0	734.33228	1466.65	-1.611	-5.2962792	41.686	1.747E-06	182.41	174.37	182.41	1	1	0	0	0	-1	0	0	0	0	y1;y2;y3;y4;y5;y6;y7;y8;y9;y10;y2-NH3;y8-H2O;y10-H2O;y11(2+);a2;b2;b3;b3-H2O;b4;b4-H2O;b5;b5-H2O;b6;b7;b7-H2O;b8;b8-H2O;b9;b9-H2O;b10;b10-H2O;b7(2+);b9(2+)	1.147167E+07;2.338638E+07;8560718;7458449;5116132;2300122;2229745;3620296;1641807;4261715;5331915;548677.6;619065.1;2191363;1.58561E+07;5.829122E+07;1.061816E+07;3421794;1565775;996800.9;793530.3;891789.8;1700227;7395983;2598683;4487093;1745580;2866140;1.090064E+07;1232976;3231341;734507.8;615681.6	0.0008031424;0.001735878;0.00237181;0.003789004;0.01353013;-0.0002503336;0.004234253;0.01113546;0.003172228;0.005560058;0.0005602371;-0.0005941259;0.01778895;0.007012876;0.0009134336;0.00116487;0.001450287;0.001492642;0.003279633;-0.0005394174;0.001292135;0.009962304;0.0008469454;0.00497425;0.00321993;0.005234129;0.004335186;0.004101623;0.004376168;0.0008643473;0.006807213;0.006433045;0.0005401555	5.459394;5.209869;4.938614;6.518106;19.88663;-0.3147252;4.650847;11.00922;2.738195;4.414301;1.771977;-0.5980321;14.32821;10.0355;5.0436;5.57082;4.67609;5.109355;7.173566;-1.228248;2.314689;18.44142;1.257976;6.310234;4.180239;5.8986;4.986746;4.149761;4.509704;0.7612232;6.091711;16.301;1.091874	147.112001028182;333.190381245735;480.258159230598;581.304420510649;680.363093301586;795.403816796233;910.42627524122;1011.4670525102;1158.5104149694;1259.5557056135;316.165007785506;993.468217408274;1241.53291203546;698.80671412442;181.107474061068;209.102137246312;310.149530303798;292.138923263053;457.183100185774;439.176354550317;558.23276615807;540.213531302447;673.260154379901;788.2829701077…	33	0.5080672	0.222973
20140904-PurClathDigest-1ug-01	5552	2799	0	AHTMTDDVTFWK	12	0	Oxidation (M)	_AHTM(ox)TDDVTFWK_		AHTM(1)TDDVTFWK		AHTM(120.53)TDDVTFWK	0	0	1	P49951;F1MPU0	2	HCD	FTMS	MULTI-MSMS	1	0	734.33228	1466.65	-1.611	-5.5690095	41.934	0.003326	120.53	112.48	120.53	1	1	0	0	0	-1	0	0	0	0	y1;y2;y3;y4;y5;y6;y7;y8;y9;y10;y2-NH3;y11(2+);a2;b2;b3;b3-H2O;b4;b6;b6-H2O;b7;b7-H2O;b8;b9;b9-H2O;b10;b10-H2O	440790;863295.5;283294.2;307273.7;153935;96507.3;59662;89775.5;42349.1;115781.8;192213.1;89917.5;470675.1;2149968;332250.3;98726.1;50679.3;60530.6;36823;276238.9;102125.4;169117.6;127785.8;314412.6;30835.7;79225.9	0.0008635438;0.001970371;0.001225131;0.002620596;0.005506895;0.004487898;0.004638338;-0.008341229;-0.01786043;0.008375573;-0.0002863697;-0.003412879;0.000949202;0.001065856;0.001015011;0.002546751;0.002865378;0.005122706;0.002868716;0.002651224;0.003976619;0.005176499;0.01066343;0.006741556;0.01103145;0.008789207	5.869977;5.913652;2.550979;4.508122;8.093958;5.642323;5.09469;-8.246505;-15.41644;6.64964;-0.9057579;-4.883794;5.241099;5.097297;3.272645;8.717634;6.267456;7.608855;4.378064;3.36328;5.162607;5.833653;10.78865;6.947288;9.71539;7.865392	147.111940626857;333.190146753399;480.259305909003;581.305588918067;680.37111653568;795.399078564332;910.425871157;1011.48652919739;1158.53144763068;1259.55289009811;316.165854392317;698.817139879043;181.107438292709;209.102236260638;310.149965580216;292.137869153404;457.183514441523;673.255878619071;655.247567923085;788.285293133097;770.273403052134;887.351181774639;988.39337331605;970.386730504…	26	0.5073639	0.226087
20140904-PurClathDigest-1ug-01	5617	2856	0	AHTMTDDVTFWK	12	0	Oxidation (M)	_AHTM(ox)TDDVTFWK_		AHTM(1)TDDVTFWK		AHTM(151.26)TDDVTFWK	0	0	1	P49951;F1MPU0	2	HCD	FTMS	MULTI-MSMS	2	0	734.33228	1466.65	-1.611	-4.6144532	42.175	6.2303E-06	151.26	146.16	151.26	1	1	0	0	0	-1	0	0	0	0	y1;y2;y3;y4;y5;y6;y7;y8;y10;y2-NH3;y10-H2O;a2;b2;b3;b3-H2O;b4;b6;b7;b7-H2O;b8;b8-H2O;b9;b9-H2O;b10;b10-H2O;b7(2+)	291282.4;514459.8;184677.1;192626.8;95622.8;37013.7;50438.9;47357.5;50585.1;103403.1;18157.8;349486.1;1272950;210598.7;64864.7;42835.2;58294.2;140447.2;41855.1;88736.9;34985.4;42992.3;188337;18594.1;57620.6;16405.9	0.0008745919;0.001716686;0.003341688;0.002799745;0.008614378;0.00889654;0.004118396;0.005541444;0.008482672;-0.0004528186;0.01322433;0.0009036695;0.0010668;0.001590059;0.001139808;0.005915151;0.003714294;0.004313065;0.006099975;0.006288764;0.000642358;0.006926698;0.00460708;0.01368394;0.005694303;0.004412145	5.945078;5.152268;6.958121;4.816306;12.66135;11.18506;4.52359;5.47859;6.73467;-1.432218;10.65158;4.989686;5.101813;5.126752;3.901589;12.93833;5.516901;5.471463;7.919255;7.087129;0.7388988;7.008011;4.747663;12.05146;5.095773;11.18009	147.111929578671;333.190400437633;480.257189352744;581.305409769596;680.368009052181;795.394669922548;910.426391098543;1011.47264652486;1259.55278299881;316.166020841182;1241.53747665376;181.107483825204;209.10223531633;310.14939053171;292.139276097113;457.180464668882;673.257287031149;788.283631292491;770.271279696375;887.350069509622;869.345151229179;988.397110049758;970.388864981698;1135.45876…	26	0.493955	0.1911765
20140904-PurClathDigest-1ug-01	5440	2701	0	AHTMTDDVTFWK	12	0	Oxidation (M)	_AHTM(ox)TDDVTFWK_		AHTM(1)TDDVTFWK		AHTM(43.6)TDDVTFWK	0	0	1	P49951;F1MPU0	3	HCD	FTMS	MULTI-MSMS	1	0	489.89061	1466.65	-0.80044	-4.3256772	41.498	0.053344	43.604	42.816	43.604	1	1	0	0	0	-1	0	0	0	0	y1;y2;y3;y4;y6;y2-NH3;a2;b2;b3;b4;b7	556149.2;3197009;1275202;1597586;356798.7;496495;364982.7;1763902;539535.2;386458.4;1073625	0.0005823099;0.002009608;0.002339711;0.001715131;0.002023704;-0.005302873;0.001154055;0.00168768;0.00195443;0.004796551;0.004556499	3.95827;6.031415;4.871777;2.950477;2.544255;-16.77217;6.372219;8.0711;6.301582;10.49157;5.78028	147.112221860684;333.190107516519;480.258191329614;581.306494382997;795.401542758377;316.170870894916;181.107233439866;209.1016144368;310.149026161344;457.1815832682;788.283387858436	11	0.4340495	0.25
20140904-PurClathDigest-1ug-01	10030	6718	0	AHTMTDDVTFWK	12	0	Oxidation (M)	_AHTM(ox)TDDVTFWK_		AHTM(1)TDDVTFWK		AHTM(50.35)TDDVTFWK	0	0	1	P49951;F1MPU0	2	HCD	FTMS	MULTI-SECPEP	7	-1	734.33228	1466.65	0.78154	-865.07877	61.286	0.030041	50.354	46.637	50.354	1	1	0	0	0	-1	0	0	0	0	y1;y2;y3;y4;y10;y11(2+);a2;b2;b3;b7;b8;b9;b9-H2O	7750.9;7345.5;2674.9;1981;3342.9;1038.9;3572.5;20343;2645.9;2101.8;2004;991.9;3096.4	0.0004434391;0.002285189;0.002259162;-0.0003746196;0.008766988;0.01047214;0.001338001;0.001193898;0.002657103;-0.006345297;0.003658741;-0.008299504;0.006272827	3.014289;6.85852;4.704056;-0.6444418;6.960399;14.98583;7.3879;5.709642;8.5672;-8.049401;4.123209;-8.396804;6.464252	147.112360731465;333.189831935189;480.258271878442;581.308584133986;1259.55249868255;698.803254854685;181.107049493986;209.102108218577;310.148323488262;788.294289654575;887.352699532647;988.412336251925;970.387199234172	13	0.285694	0.1444445
20140904-PurClathDigest-1ug-02	5010	2451	0	AHTMTDDVTFWK	12	0	Oxidation (M)	_AHTM(ox)TDDVTFWK_		AHTM(1)TDDVTFWK		AHTM(167.83)TDDVTFWK	0	0	1	P49951;F1MPU0	2	HCD	FTMS	MULTI-MSMS	1	0	734.33228	1466.65	-1.1563	-4.0689925	41.788	4.3565E-06	167.83	163.62	167.83	1	1	0	0	0	-1	0	0	0	0	y1;y2;y3;y4;y5;y6;y7;y8;y9;y10;y2-NH3;y10-H2O;y11(2+);a2;b2;b3;b3-H2O;b4;b4-H2O;b5;b5-H2O;b6;b6-H2O;b7;b7-H2O;b8;b8-H2O;b9;b9-H2O;b10;b10-H2O;b9(2+)	784832.4;1702485;626262.2;627225.9;430552.6;200476.5;227091;239662.5;93855.5;335662.9;354525.1;82890.7;98337.6;1145823;3710041;768024.2;207325.8;102756.5;59662.5;49216.3;50163.1;120073.6;70930;577974.2;186200.9;290337.6;182628.1;297043.1;702703.3;121875.7;173783.4;72700.9	0.0006985364;0.001521668;0.00181287;0.002414122;0.01090952;-0.0009940806;0.0005400469;0.003014011;0.01096664;0.006021372;0.0005699447;0.00504042;0.00416495;0.0007882164;0.0009060963;0.001320017;0.001446507;0.003192536;0.001351573;0.002938299;0.003468379;0.003828671;-0.004622109;0.002944537;0.005309693;0.004586642;0.005990382;0.004021905;0.004474009;0.004781062;0.001296266;0.002116855	4.748327;4.56696;3.774778;4.15293;16.03479;-1.24978;0.5931779;2.979817;9.466215;4.780554;1.802681;4.059794;5.960064;4.3522;4.333266;4.256065;4.951435;6.983056;3.07753;5.263589;6.420308;5.686788;-7.053908;3.735371;6.89327;5.16891;6.890726;4.069107;4.610531;4.210655;1.16001;4.279037	147.112105634181;333.190595455804;480.258718170433;581.305795391914;680.365713907842;795.404560543123;910.429969447724;1011.47517395816;1158.50262056151;1259.55524429895;316.164998077847;1241.5456605644;698.809562050167;181.107599278298;209.102396020508;310.149660573825;292.138969397688;457.183187283256;439.174463560279;558.231119994153;540.220025228154;673.257172654753;655.255058747721;788.28499…	32	0.4858637	0.1828571
20140904-PurClathDigest-1ug-02	5074	2507	0	AHTMTDDVTFWK	12	0	Oxidation (M)	_AHTM(ox)TDDVTFWK_		AHTM(1)TDDVTFWK		AHTM(158.01)TDDVTFWK	0	0	1	P49951;F1MPU0	2	HCD	FTMS	MULTI-MSMS	1	0	734.33228	1466.65	-1.1563	-5.0235488	42.052	6.3111E-06	158.01	147.16	158.01	1	1	0	0	0	-1	0	0	0	0	y1;y2;y3;y4;y5;y6;y7;y8;y9;y10;y11;y2-NH3;y10-H2O;y10-NH3;a2;b2;b3;b3-H2O;b4;b4-H2O;b6;b6-H2O;b7;b7-H2O;b8;b8-H2O;b9;b9-H2O;b10;b10-H2O;b7(2+);b9(2+)	8971167;1.531713E+07;5116278;5118006;3352626;1348524;1193553;2167951;931246.4;1914195;852677.6;2807034;319487.2;270913.6;1.082924E+07;3.825039E+07;6172210;1973304;941381.6;396574.6;1258963;503289.5;4626561;1564012;2922276;1245312;1975014;6008770;1182844;1428937;329983.5;385261.3	0.0009335265;0.001904642;0.002784622;0.004329287;0.009434505;-0.003459675;-0.004753646;0.01050776;0.02198008;0.009241518;0.0001788195;-0.0005634167;0.0230519;-0.01644672;0.0009502888;0.001208345;0.001463155;0.002612214;0.003513718;0.002728963;0.001728507;0.008515347;0.006931243;0.001366389;0.005017491;0.005702803;0.01335467;0.005475325;0.003649775;0.01065217;-0.001776373;-0.0002039763	6.345692;5.716379;5.798183;7.447546;13.86679;-4.349566;-5.221289;10.38863;18.97302;7.337146;0.1280373;-1.782027;18.56737;-13.23625;5.2471;5.778734;4.717578;8.941719;7.685586;6.213867;2.567372;12.99573;8.792857;1.773895;5.654458;6.559922;13.51153;5.642408;3.214333;9.532557;-4.501143;-0.4123183	147.111870644032;333.19021248254;480.257746418045;581.303880227299;680.367188924925;795.407026137563;910.435263140766;1011.46768020882;1158.49160711306;1259.55202415391;1396.61999871404;316.16613143935;1241.52764908695;1242.55116328964;181.107437205856;209.102093771447;310.149517436162;292.137803690634;457.182866100874;439.173086169646;673.259272818407;655.241921292186;788.281013114733;770.276013…	32	0.4975008	0.2162162
20140904-PurClathDigest-1ug-02	5139	2564	0	AHTMTDDVTFWK	12	0	Oxidation (M)	_AHTM(ox)TDDVTFWK_		AHTM(1)TDDVTFWK		AHTM(162.49)TDDVTFWK	0	0	1	P49951;F1MPU0	2	HCD	FTMS	MULTI-MSMS	2	0	734.33228	1466.65	-1.1563	-4.2053577	42.305	5.4207E-06	162.49	156.98	162.49	1	1	0	0	0	-1	0	0	0	0	y1;y2;y3;y4;y5;y6;y7;y8;y9;y10;y2-NH3;y10-H2O;y11(2+);a2;b2;b3;b3-H2O;b4;b4-H2O;b6;b7;b7-H2O;b8;b8-H2O;b9;b9-H2O;b10;b10-H2O;b9(2+)	256816.3;476688.2;180053.4;157797.8;105952.6;26445.4;44375.1;63791.6;22199.1;81260.5;95406.5;15373.3;27732.2;342928.4;1257268;182865.2;64448;26930.9;16914.9;44542.3;145479;38892;106084.5;34928.3;46893.2;157370.2;26853.8;49054.4;10386.6	0.0007909628;0.001605492;0.002235915;0.003318391;0.01190905;-0.0006868124;-0.001548268;0.001676249;-0.007982993;0.004507752;0.0003900058;0.005809018;0.006319982;0.0007443991;0.0009494295;0.001754335;0.001816725;0.002094264;0.002541182;0.002084774;0.00129345;0.007228684;0.003633046;0.007709795;0.003340989;0.00360672;0.01988393;0.005146072;0.009090195	5.376602;4.818541;4.65565;5.708521;17.50393;-0.863476;-1.700586;1.65723;-6.890673;3.57884;1.233551;4.678863;9.043953;4.110258;4.540501;5.656423;6.218709;4.580787;5.786285;3.096542;1.640837;9.384608;4.094253;8.868581;3.380197;3.716774;17.5119;4.605164;18.3753	147.112013207798;333.190511632056;480.258295125707;581.304891123414;680.364714376326;795.404253275045;910.432057762283;1011.47651171984;1158.52157019016;1259.55675791932;316.165178016781;1241.54489196685;698.807407018518;181.107643095595;209.10235268732;310.14922625581;292.138599179829;457.184285555553;439.173273951322;673.258916550992;788.286650907007;770.270150987494;887.352725227463;869.338083…	29	0.4942704	0.1959459
20140904-PurClathDigest-1ug-02	5204	2621	0	AHTMTDDVTFWK	12	0	Oxidation (M)	_AHTM(ox)TDDVTFWK_		AHTM(1)TDDVTFWK		AHTM(132.86)TDDVTFWK	0	0	1	P49951;F1MPU0	2	HCD	FTMS	MULTI-MSMS	3	0	734.33228	1466.65	-1.1563	-4.7508184	42.561	0.00036716	132.86	127.77	132.86	1	1	0	0	0	-1	0	0	0	0	y1;y2;y3;y4;y5;y6;y7;y8;y9;y10;y2-NH3;y11(2+);a2;b2;b3;b3-H2O;b4;b4-H2O;b6;b7;b7-H2O;b8;b8-H2O;b9;b9-H2O;b10;b10-H2O;b9(2+)	125722.8;199210.2;93759.5;82319.5;62225.5;21165.1;21808.4;28841.5;6355.1;44031.3;27783.2;10485.4;135951.3;512233.4;89317.6;18369.8;11189.4;6148.8;18268.7;76964.3;22770.3;43885.7;12177.3;14269.4;85126.7;12868.1;17982.2;5318.1	0.0009216671;0.002246134;0.002343332;0.004438483;0.01144638;0.008632582;0.005928172;0.00383175;0.01676569;0.01359876;0.0001045259;0.006155527;0.00110608;0.0012781;0.001931041;0.002019286;0.001278168;0.006426455;0.007909121;0.007288156;0.006414088;0.005031003;-0.005070921;0.00679269;0.006683512;-0.004916616;0.01393372;0.007427559	6.265076;6.741302;4.879316;7.635393;16.82388;10.8532;6.511436;3.788282;14.47193;10.79654;0.3306051;8.808615;6.107321;6.112327;6.22617;6.912088;2.795734;14.6332;11.74762;9.245636;8.327055;5.669686;-5.832997;6.872429;6.887472;-4.329999;12.46924;15.01432	147.111882503442;333.189870990484;480.258187708616;581.303771031486;680.365177049359;795.394933881247;910.424581323;1011.47435621872;1158.49682151164;1259.5476669116;316.165463496691;698.807571473088;181.107281414427;209.102024016934;310.1490495503;292.138396618253;457.18510165136;439.169388678189;673.253092204013;788.280656201452;770.270965582767;887.351327270481;869.350864508374;988.39724405807…	28	0.5141339	0.2434783
20140904-PurClathDigest-1ug-02	5320	2723	0	AHTMTDDVTFWK	12	0	Oxidation (M)	_AHTM(ox)TDDVTFWK_		AHTM(1)TDDVTFWK		AHTM(127.52)TDDVTFWK	0	0	1	P49951;F1MPU0	2	HCD	FTMS	MULTI-MSMS	7	0	734.33228	1466.65	-1.1563	-5.2962792	43.02	4.5618E-05	127.52	123.33	127.52	1	1	0	0	0	-1	0	0	0	0	y1;y2;y3;y4;y6;y7;y8;y9;y10;y2-NH3;y10-H2O;y11(2+);a2;b2;b3;b3-H2O;b4;b4-H2O;b5;b6;b6-H2O;b7;b7-H2O;b8;b8-H2O;b9;b9-H2O;b9(2+)	49199.7;66501.8;24857.3;26225.5;7905.5;9542.3;11017.8;3815.9;16184.6;11831.8;3644;2947.8;50954.3;180899;25172.4;9358.6;3539.4;3981.3;1708.8;5840.6;1682.7;19665.2;5552.9;14129;6070.1;9427.8;23990.2;1746.2	0.0008480985;0.001802309;0.002362108;0.005505329;0.004853971;0.004212841;0.01296022;0.01954788;0.01658075;-0.0002506786;0.01456168;0.007186546;0.0009151211;0.001127328;0.001951269;0.001799348;0.003590061;-0.002959718;0.006829759;-0.001241435;0.00440409;0.006874106;0.006648722;0.006627197;0.00222522;0.0105761;0.009977657;0.007369414	5.764987;5.409247;4.918412;9.470675;6.102564;4.627328;12.81331;16.87353;13.16408;-0.7928706;11.72876;10.28403;5.052917;5.391277;6.291391;6.159228;7.852573;-6.739209;12.23473;-1.84391;6.721277;8.720375;8.631669;7.468529;2.559655;10.7003;10.28218;14.89679	147.111956072106;333.190314815382;480.25816893268;581.302704185021;795.398712491504;910.426296653516;1011.46522774899;1158.49403931696;1259.54468491852;316.165818701178;1241.53613930192;698.806540453703;181.107472373637;209.102174788967;310.149029321876;292.138616556304;457.182789757774;439.17877485041;558.227228534793;673.262242760127;655.246032548749;788.281070250772;770.27073094899;887.3497310…	28	0.4647674	0.2153846
20140904-PurClathDigest-1ug-03	4776	2350	0	AHTMTDDVTFWK	12	0	Oxidation (M)	_AHTM(ox)TDDVTFWK_		AHTM(1)TDDVTFWK		AHTM(183.37)TDDVTFWK	0	0	1	P49951;F1MPU0	2	HCD	FTMS	MULTI-MSMS	1	0	734.33228	1466.65	-0.68999	-5.2962792	41.786	1.6812E-06	183.37	176.48	183.37	1	1	0	0	0	-1	0	0	0	0	y1;y2;y3;y4;y5;y6;y7;y8;y9;y10;y11;y2-NH3;y4-H2O;y8-NH3;y10-H2O;y10-NH3;y11-H2O;a2;b2;b3;b3-H2O;b4;b4-H2O;b5;b5-H2O;b6;b6-H2O;b7;b7-H2O;b8;b8-H2O;b9;b9-H2O;b10;b10-H2O;b7(2+);b9(2+)	1597388;3263893;1317229;1324123;866274.8;310671;396899.7;587411;125777.7;709496.6;310351.5;639006.6;54752.6;82527.2;73588.2;44339.8;254886.9;2221011;7813790;1527060;338249.1;207664.6;83415.1;98980.5;68857.5;233690.4;125953.1;967862.1;510777.7;652854;194404;592455.4;1340653;146566.6;472528.3;32525.7;72177	0.0007570831;0.001744515;0.002276898;0.00262239;0.01256477;0.005664116;-0.000290714;0.003034419;0.006638833;0.01088397;0.004876461;0.0005220465;0.002946994;-0.008917246;-0.008816751;-0.004063443;0.01608541;0.000906428;0.001101726;0.001451275;0.001448831;0.003629187;0.002373572;0.001664188;0.001709545;0.001720142;0.001961546;0.004575218;0.00238326;0.002968108;0.007734766;0.006771272;0.0053931;0.00…	5.146303;5.235791;4.740986;4.511208;18.46771;7.12111;-0.3193147;2.999994;5.730507;8.641155;3.491628;1.651183;5.231709;-8.966918;-7.101352;-3.270274;11.66799;5.004918;5.268837;4.679275;4.959389;7.938154;5.404634;2.981174;3.164524;2.554947;2.993592;5.804027;3.094037;3.3449;8.897305;6.850759;5.557673;3.029935;9.502797;-3.840246;19.06781	147.11204708749;333.190372608943;480.258254142453;581.305587124283;680.364058663077;795.397902346511;910.430800208578;1011.47515354947;1158.50694836424;1259.55038170081;1396.61530107241;316.165045976114;563.294697833802;994.460556113278;1241.55951773581;1242.53878001256;1378.59352743342;181.107481066694;209.102200391314;310.149529316189;292.138967073833;457.182750632384;439.17344156109;558.232394…	37	0.4856983	0.2151163
20140904-PurClathDigest-1ug-03	4840	2406	0	AHTMTDDVTFWK	12	0	Oxidation (M)	_AHTM(ox)TDDVTFWK_		AHTM(1)TDDVTFWK		AHTM(167.71)TDDVTFWK	0	0	1	P49951;F1MPU0	2	HCD	FTMS	MULTI-MSMS	1	0	734.33228	1466.65	-0.68999	-4.8871836	42.06	4.381E-06	167.71	158.82	167.71	1	1	0	0	0	-1	0	0	0	0	y1;y2;y3;y4;y5;y6;y7;y8;y9;y10;y2-NH3;y11(2+);a2;b2;b3;b3-H2O;b4;b4-H2O;b5;b6;b7;b7-H2O;b8;b8-H2O;b9;b9-H2O;b10;b10-H2O;b7(2+);b9(2+)	7021114;1.254878E+07;4973289;5172661;2846961;1146033;1178270;2311928;721701.1;2937542;2583443;913753.9;9337845;3.304161E+07;5848034;1874485;943470.6;367720.8;361423.5;1297355;3933754;1059029;2431790;905354.8;1811467;4909710;749603.9;1874317;302596.1;487913.3	0.0008604097;0.001838581;0.002947611;0.002965671;0.0123037;0.0021718;0.00398863;0.003661947;0.01984705;0.01051799;0.0009913378;0.001885404;0.0009917397;0.001189914;0.001838735;0.001574408;0.004402294;0.001269884;0.001859822;0.003299886;0.00555033;0.005505235;0.005497131;0.001274457;0.005523199;0.005232391;0.01130754;0.007423836;0.001732732;0.0003677782	5.848673;5.51811;6.137562;5.101745;18.08398;2.730445;4.381057;3.620405;17.13177;8.350587;3.135512;2.698014;5.475976;5.690589;5.928552;5.389247;9.629193;2.891524;3.331627;4.901371;7.041043;7.147133;6.194992;1.465998;5.588028;5.392059;9.958544;6.643525;4.390599;0.7434288	147.111943760895;333.190278543406;480.257583429455;581.305243843084;680.364319733562;795.401394663103;910.426520864257;1011.47452602129;1158.49374014851;1259.55074768394;316.164576684801;698.81184159631;181.107395755045;209.102112202633;310.149141855581;292.13884149622;457.181977525217;439.174545249299;558.232198471527;673.257701439578;788.282394027097;770.271874435714;887.350861142447;869.344519…	30	0.48842	0.1935484
20140904-PurClathDigest-1ug-03	4904	2462	0	AHTMTDDVTFWK	12	0	Oxidation (M)	_AHTM(ox)TDDVTFWK_		AHTM(1)TDDVTFWK		AHTM(174.42)TDDVTFWK	0	0	1	P49951;F1MPU0	2	HCD	FTMS	MULTI-MSMS	1	0	734.33228	1466.65	-0.68999	-6.1144703	42.332	1.7981E-06	174.42	165.53	174.42	1	1	0	0	0	-1	0	0	0	0	y1;y2;y3;y4;y5;y6;y7;y8;y10;y2-NH3;y11(2+);a2;b2;b3;b3-H2O;b4;b4-H2O;b6;b6-H2O;b7;b7-H2O;b8;b8-H2O;b9;b9-H2O;b10;b10-H2O;b7(2+);b9(2+)	334811.9;557941.1;260764.5;210518.9;107459.4;39295;71358;91910.5;161350.3;114966.5;37109;406157.6;1536700;250098.4;85325.3;37703.5;17253.9;38788.4;17831.9;173226.4;67702.1;88718.5;40316.5;87606.1;228086.8;37566.8;58230.6;14127.7;21716	0.0009147536;0.001989715;0.002464325;0.003360323;0.01092236;0.008085013;0.003876407;0.01047786;0.007880496;0.0007849613;0.00210303;0.0009728514;0.001207073;0.00163473;0.001822505;0.001121348;0.002075775;-0.0002568505;-0.001628088;0.005242655;0.005444285;0.006276964;0.002898898;0.00629464;0.006128909;0.004740804;-0.0004592213;0.002679804;0.006355225	6.218081;5.971711;5.131252;5.780655;16.05365;10.16477;4.257792;10.35906;6.256579;2.48276;3.009438;5.371682;5.772649;5.270782;6.238493;2.452722;4.726547;-0.381502;-2.484675;6.65073;7.068005;7.073831;3.334585;6.368529;6.315941;4.1752;-0.4109502;6.790418;12.84664	147.111889417016;333.190127408972;480.25806671502;581.304849191305;680.365701074562;795.395481449673;910.426633087184;1011.46771011297;1259.5533851756;316.164783061342;698.811623969981;181.107414643361;209.102095043734;310.149345861086;292.138593399995;457.185258470768;439.173739357697;673.261258175806;655.252064727291;788.282701702079;770.271935385766;887.350081309067;869.342894689692;988.397742…	29	0.5045796	0.2
20140904-PurClathDigest-1ug-03	4970	2520	0	AHTMTDDVTFWK	12	0	Oxidation (M)	_AHTM(ox)TDDVTFWK_		AHTM(1)TDDVTFWK		AHTM(142.97)TDDVTFWK	0	0	1	P49951;F1MPU0	2	HCD	FTMS	MULTI-MSMS	3	0	734.33228	1466.65	-0.68999	-4.478088	42.597	0.00018304	142.97	136.07	142.97	1	1	0	0	0	-1	0	0	0	0	y1;y2;y3;y4;y6;y7;y8;y9;y10;y2-NH3;y10-H2O;y11(2+);a2;b2;b3;b3-H2O;b4;b4-H2O;b5;b6;b7;b7-H2O;b8;b8-H2O;b9;b9-H2O;b10;b10-H2O	107744.7;215600.4;82896.5;75765.5;18120.7;25857.5;30194.5;10402.8;22084.3;44015.4;5346.7;16542.3;163606.2;575552.1;81659;32280.1;10367.8;9632.1;5428.6;16262.2;61591.6;21899.9;43720.4;16073.2;30143.8;78654.5;11315.5;21170	0.0009894222;0.002174775;0.003323314;0.003319129;0.008317947;0.001918823;0.006860823;0.01819426;-0.00432298;0.001347613;-0.002645236;0.001985299;0.00111532;0.001321359;0.001413156;0.001847527;0.001703544;0.003736741;0.005058334;0.006793182;0.004071868;0.00462965;0.004417798;0.00868313;0.006567564;0.007636398;0.01526749;0.008038226	6.725647;6.527134;6.919863;5.70979;10.45763;2.107604;6.783013;15.70507;-3.432119;4.262382;-2.130586;2.840965;6.15834;6.319211;4.55637;6.324148;3.726161;8.508602;9.061397;10.09007;5.165485;6.010404;4.978631;9.98822;6.644659;7.869445;13.44611;7.19334	147.111814748428;333.189942348699;480.257207726402;581.304890385613;795.395248515499;910.428590672062;1011.47132714537;1158.49539294096;1259.56558865049;316.164220409846;1241.55334622092;698.811741700639;181.107272174534;209.101980757358;310.149567434808;292.138568377095;457.184676275221;439.172078392126;558.228999959265;673.254208143492;788.283872488678;770.272750020647;887.351940475911;869.3371…	28	0.4716709	0.2222222
20140904-PurClathDigest-1ug-03	5038	2580	0	AHTMTDDVTFWK	12	0	Oxidation (M)	_AHTM(ox)TDDVTFWK_		AHTM(1)TDDVTFWK		AHTM(126.34)TDDVTFWK	0	0	1	P49951;F1MPU0	2	HCD	FTMS	MULTI-MSMS	7	0	734.33228	1466.65	-0.68999	-7.6144873	42.874	0.0004859	126.34	119.45	126.34	1	1	0	0	0	-1	0	0	0	0	y1;y2;y3;y4;y5;y6;y7;y8;y9;y10;y2-NH3;a2;b2;b3;b3-H2O;b4;b6;b7;b7-H2O;b8;b8-H2O;b9;b9-H2O;b10;b10-H2O;b9(2+)	54177.1;97416.2;37574.2;28595.1;21841.2;9013.8;8545.8;12704.3;4559.6;19849.3;19412.5;69224;257806;43417.7;9242.5;6670.3;5630.8;29461.4;6472;18516.9;5619.7;13029.1;32837.1;4482.7;9087;4325.6	0.001006137;0.001918295;0.002487112;0.003582201;0.008762239;0.008659223;0.004961379;0.003473257;0.01152448;0.01350256;9.34254E-05;0.0009896243;0.001148456;0.001380177;0.003494898;0.007123184;0.006907761;0.002379867;0.01200065;0.004293667;-0.00393127;0.006301444;0.007347268;-0.007846734;0.002738589;-0.001284882	6.839266;5.757357;5.178699;6.162346;12.87868;10.8867;5.449517;3.433854;9.947738;10.72016;0.2954953;5.464295;5.492321;4.450038;11.96322;15.58072;10.26026;3.019042;15.57989;4.838741;-4.522081;6.375413;7.571489;-6.910498;2.450728;-2.597258	147.111798033815;333.190198829266;480.258043928342;581.304627314003;680.367861192236;795.394907239675;910.425548115156;1011.47471471177;1158.50206272172;1259.54776311241;316.1654745972;181.107397870354;209.102153660837;310.149600413413;292.136921006761;457.179256635164;673.254093564432;788.285564490166;770.265379022032;887.352064607041;869.349724857395;988.397735304204;970.386124793829;1135.48029…	26	0.5162396	0.226087
20140904-PurClathDigest-1ug-03	5134	2664	0	AHTMTDDVTFWK	12	0	Oxidation (M)	_AHTM(ox)TDDVTFWK_		AHTM(1)TDDVTFWK		AHTM(140.91)TDDVTFWK	0	0	1	P49951;F1MPU0	2	HCD	FTMS	MULTI-MSMS	7	0	734.33228	1466.65	-0.68999	-5.7053747	43.267	0.00022062	140.91	132.02	140.91	1	1	0	0	0	-1	0	0	0	0	y1;y2;y3;y4;y5;y6;y7;y8;y9;y10;y2-NH3;y4-H2O;y5-H2O;y11(2+);a2;b2;b3;b3-H2O;b4;b6;b7;b7-H2O;b8;b8-H2O;b9;b9-H2O;b10;b10-H2O	36767.6;45015.9;17909.7;17517;11946.2;3565.8;5064.7;9553;3995.3;8112.6;11771.6;2204.2;3435.8;4302.5;32999.5;127721.3;22223.8;5461.1;2355.2;4082.3;16729.5;6335.2;10025.8;4959.3;5978.7;19974.3;2543.3;4716.2	0.0008049483;0.001935803;0.00246231;0.001409293;0.01106711;0.006507396;0.01101347;0.006882147;0.006399082;0.0105005;-0.000351977;-0.0008095541;-8.618911E-05;0.002677606;0.0009125051;0.001157354;0.002135476;0.00151504;0.002875036;-0.004521398;0.005063046;0.009008817;0.002003076;0.007751475;0.008680799;0.007707927;0.01552057;-0.000887044	5.47167;5.809904;5.127056;2.424353;16.26642;8.181317;12.09714;6.804096;5.523558;8.336706;-1.113267;-1.437167;-0.1301231;3.83166;5.038473;5.534873;6.885326;5.186025;6.288582;-6.715624;6.42288;11.69569;2.257358;8.916525;8.78272;7.943158;13.66901;-0.7938018	147.111999222337;333.190181321119;480.258068730242;581.306800221406;680.365556319866;795.39705906664;910.419496020474;1011.47130582137;1158.50718811527;1259.55076516632;316.16591999958;563.298454382162;662.366144933411;698.811049393935;181.107474989615;209.102144762951;310.148845115024;292.138900865047;457.183504783143;673.265522722998;788.282881310858;770.268370853819;887.35435519755;869.3380421…	28	0.4799287	0.1917808
20140904-PurClathDigest-1ug-03	4792	2364	0	AHTMTDDVTFWK	12	0	Oxidation (M)	_AHTM(ox)TDDVTFWK_		AHTM(1)TDDVTFWK		AHTM(51.29)TDDVTFWK	0	0	1	P49951;F1MPU0	3	HCD	FTMS	MULTI-MSMS	1	0	489.89061	1466.65	-0.04753	-5.7575116	41.85	0.036779	51.286	48.512	51.286	1	1	0	0	0	-1	0	0	0	0	y1;y2;y3;y4;y5;y2-NH3;a2;b2;b3;b3-H2O;b4;b7;b7-H2O	290280.9;1668086;682724.4;1108837;125681.1;159807.9;137323.7;1193723;640502.6;140534.5;251765.9;701516.6;229589.1	0.000658522;0.001643814;0.004048148;0.003545609;0.007590158;-0.003499264;0.001307085;0.001427002;0.001851832;0.004385243;0.001076859;0.0004633196;0.005183119	4.476326;4.933556;8.429137;6.099399;11.15594;-11.0677;7.217193;6.824435;5.970779;15.01096;2.355411;0.5877546;6.728945	147.11214564856;333.190473310337;480.256482892765;581.304663905395;680.369033272911;316.169067286421;181.107080410008;209.101875114557;310.149128758855;292.136030661475;457.185302959796;788.287481037705;770.272196551495	13	0.5135589	0.2407407
20140904-PurClathDigest-1ug-03	4856	2420	0	AHTMTDDVTFWK	12	0	Oxidation (M)	_AHTM(ox)TDDVTFWK_		AHTM(1)TDDVTFWK		AHTM(45.43)TDDVTFWK	0	0	1	P49951;F1MPU0	3	HCD	FTMS	MULTI-MSMS	1	0	489.89061	1466.65	-0.04753	-4.9393205	42.133	0.045689	45.433	42.115	45.433	1	1	0	0	0	-1	0	0	0	0	y1;y2;y3;y4;b2;b3;b3-H2O;b7;b7-H2O	209055.6;866305.1;446166.6;709514.8;516561.2;253280.7;128000.7;333198.1;129742.2	0.001209474;0.001751548;0.002919526;0.004277247;0.00102219;0.003910209;0.002706753;0.006581257;0.008040539	8.221476;5.256898;6.079082;7.358023;4.888469;12.6076;9.265333;8.348867;10.43861	147.111594696207;333.190365576131;480.257611514619;581.303932267107;209.102279926866;310.147070381676;292.137709151461;788.281363100538;770.269339132005	9	0.4073524	0.2045455
20140904-PurClathDigest-1ug-01	6201	3367	0	AHTMTDDVTFWK	12	0	Unmodified	_AHTMTDDVTFWK_					0	0	0	P49951;F1MPU0	2	HCD	FTMS	MULTI-MSMS	2	0	726.33483	1450.6551	-0.99408	-3.8969744	44.347	0.00024246	112.5	110.13	NaN	NaN	1	0	0	0	-1	0	0	0	0	y1;y2;y3;y4;y5;y6;y7;y8;y9;y10;y2-NH3;y10-H2O;a2;b2;b3;b3-H2O;b4;b4-H2O;b6;b7;b7-H2O;b8;b8-H2O;b9;b9-H2O	207260.6;434201.8;207586.4;183113.8;37067.8;71855.8;28075.3;88808.4;118231;192436.2;82254.2;39884.5;403247.8;1460146;306846.8;156396.8;24859.2;29973;15262.2;147669;71387.7;80826.7;79688.9;29541.6;164748.1	0.0007400094;0.001623911;0.001430248;0.00296514;0.000832879;0.001895736;0.006135018;0.01033555;0.008200071;0.009786702;-0.001197409;-0.0002638208;0.0009614109;0.00103402;0.00169423;0.001970019;0.004820345;-0.001257324;-0.005327036;0.006753083;0.003962001;0.00569115;0.005352798;0.004615946;0.005861418	5.030242;4.873823;2.978076;5.100831;1.224146;2.38337;6.738636;10.21837;7.177239;7.869929;-3.78727;-0.2152662;5.308512;4.945045;5.462627;6.743444;10.92586;-2.971117;-8.104774;8.744274;5.252703;6.531374;6.272721;4.74694;6.141516	147.112064161215;333.190493212703;480.259100792113;581.305244374522;680.375790551618;795.401670726306;910.424374476553;1011.46785241453;1142.51047250444;1243.55656434747;316.166765431659;1225.55605018345;181.107426083828;209.102268096866;310.149286361113;292.138445885326;441.186644852718;423.182157834361;657.271413738967;772.286276652432;754.278503047991;871.355752501168;853.34552616659;972.40450…	25	0.4290962	0.1865672
20140904-PurClathDigest-1ug-02	5787	3131	0	AHTMTDDVTFWK	12	0	Unmodified	_AHTMTDDVTFWK_					0	0	0	P49951;F1MPU0	2	HCD	FTMS	MULTI-MSMS	2	0	726.33483	1450.6551	-0.94652	-4.3105806	44.871	0.00023578	95.273	92.614	NaN	NaN	1	0	0	0	-1	0	0	0	0	y1;y2;y3;y4;y5;y6;y7;y8;y9;y10;y2-NH3;y10-H2O;y11(2+);a2;b2;b3;b3-H2O;b4;b4-H2O;b6;b7;b7-H2O;b8;b8-H2O;b9(2+)	143165.9;265194.4;149193.6;140784.8;55473.6;48806.6;20871.4;61718.8;76742.6;158666.2;71436.5;23240.4;17024.4;258729.8;966258.5;232162.5;85541.1;7942.2;14536.6;14562.9;76060.5;37532.8;65580.3;46312.3;8916.2	0.000733485;0.001599408;0.003522602;0.002430076;0.007904561;0.001667587;0.0007775434;0.007672244;0.00703844;0.007583429;0.000635056;0.002396618;-0.004631684;0.000768425;0.001045541;0.001550427;0.001579031;0.008090767;0.001499725;-0.008169596;0.007280088;0.004858085;0.00711979;0.002283241;0.006874614	4.985893;4.80028;7.334826;4.180374;11.61806;2.096534;0.85404;7.585238;6.160497;6.098166;2.008622;1.955539;-6.704609;4.242919;5.000143;4.998966;5.40507;18.33879;3.543947;-12.42951;9.426676;6.440712;8.170947;2.675625;14.12491	147.112070685613;333.190517716408;480.257008438379;581.305779438654;680.368718869263;795.401898875414;910.429731951221;1011.47051572436;1142.51163413534;1243.55876762038;316.164932966627;1225.55338974493;690.820901373212;181.107619069698;209.102256575712;310.149430164297;292.13883687373;441.183374429746;423.179400785612;657.274256299284;772.285749647622;754.277606963888;871.354323861638;853.34859…	25	0.4120017	0.1748252
20140904-PurClathDigest-1ug-03	5553	3030	0	AHTMTDDVTFWK	12	0	Unmodified	_AHTMTDDVTFWK_					0	0	0	P49951;F1MPU0	2	HCD	FTMS	MULTI-MSMS	2	0	726.33483	1450.6551	-0.93931	-4.9999244	44.956	2.8159E-05	136.27	131.49	NaN	NaN	1	0	0	0	-1	0	0	0	0	y1;y2;y3;y4;y5;y6;y7;y8;y9;y10;y2-NH3;y4-H2O;y10-H2O;a2;b2;b3;b3-H2O;b4;b4-H2O;b6;b7;b7-H2O;b8;b8-H2O;b9;b9-H2O;b10;b10-H2O;b7(2+);b10(2+)	124579.5;286250.3;144946.3;134090.7;52868.7;31468.8;16533.9;54632.5;76301.5;138207.7;61449.2;9485.8;26326.6;259700.5;901780.8;231026;79232.8;13719.8;14374.9;11730.2;94809.9;44465.1;62804.1;39217.7;37833.8;113225;12318.6;27298.2;6402.5;12350.3	0.0009891427;0.001952266;0.002857772;0.003178844;0.004648526;0.004696974;0.001693076;0.007840916;0.01089782;0.009942902;0.0009016338;0.003983593;0.00795884;0.001069909;0.001234457;0.001928427;0.001837891;-0.003704346;0.004104015;0.00556729;0.005862754;0.009066831;0.004117044;0.01174369;0.01302296;0.008299111;0.005706389;0.01007555;0.002395259;0.009720393	6.723747;5.859314;5.950498;5.468462;6.83233;5.90518;1.859647;7.751997;9.538509;7.995538;2.851785;7.071965;6.494108;5.907595;5.90361;6.217744;6.291162;-8.396162;9.69811;8.470447;7.591417;12.02062;4.724863;13.76204;13.39265;8.695721;5.097394;9.147476;6.194938;17.35063	147.111815027908;333.190164858385;480.257673267954;581.305030669941;680.371974904946;795.398869488898;910.428816418306;1011.47034705286;1142.50777475382;1243.556408147;316.164666388851;563.293661234931;1225.547827523;181.107317586009;209.102067659641;310.149052163543;292.138578013407;441.195169543128;423.176796495683;657.260519413364;772.287166981101;754.273398217227;871.357326607799;853.33913527…	30	0.4757999	0.2097902
20140904-PurClathDigest-1ug-01	6298	3452	0	AIGNIELGIR	10	0	Unmodified	_AIGNIELGIR_					0	0	0	F1N1S2	2	HCD	FTMS	MULTI-MSMS	3	0	528.31402	1054.6135	-0.32825	-3.2678774	44.713	0.00025512	137.95	81.695	NaN	NaN	1	0	0	0	-1	0	0	0	0	y1;y3;y4;y5;y6;y7;y8;y9;y1-NH3;y3-NH3;y4-NH3;y5-H2O;y5-NH3;y7-NH3;y8-H2O;y8-NH3;a2;b2;b3;b4;b4-NH3;b5;b5-NH3	180874;185104.8;423808.9;650532.9;304601.5;219983.3;2202068;27503.8;31702;86070;93937.1;62241.1;15506.3;43484.2;28971.2;171859;1480149;347557.8;73437.9;77301.4;28754.2;14580.9;12010.5	0.001010604;0.002221553;0.00285849;0.002939836;0.00481106;0.002850629;0.004833903;0.002884804;0.0004688149;0.001424117;0.002828915;0.002143492;-6.872692E-05;0.006190127;-0.00115616;0.006551065;0.00083697;0.001049452;0.001357833;0.002314808;0.001438961;0.004917798;0.006379008	5.770991;6.435137;6.237082;5.00527;6.868719;3.499957;5.54668;2.929982;2.965457;4.339221;6.410714;3.764881;-0.1205049;7.762446;-1.354626;7.666849;5.326517;5.668811;5.607438;6.498791;4.242658;10.47963;14.10524	175.117941576926;345.222258332229;458.305685375484;587.348197125411;700.430389882329;814.475277760591;871.494758210238;984.580771288838;158.091934264574;328.196506666167;441.279165849293;569.3384287838;570.324656587018;797.445389160469;853.490183586537;854.466491945784;157.132702642713;185.127404782624;242.148560125322;356.190530597852;339.164857343502;469.271991588361;452.243981276732	23	0.7889537	0.2277228
20140904-PurClathDigest-1ug-02	5862	3197	0	AIGNIELGIR	10	0	Unmodified	_AIGNIELGIR_					0	0	0	F1N1S2	2	HCD	FTMS	MULTI-MSMS	5	0	528.31402	1054.6135	0.59363	-4.2160921	45.174	0.0001321	154.85	78.025	NaN	NaN	1	0	0	0	-1	0	0	0	0	y1;y2;y3;y4;y5;y6;y7;y8;y9;y1-NH3;y2-NH3;y3-NH3;y4-NH3;y5-H2O;y5-NH3;y6-NH3;y7-NH3;y8-H2O;y8-NH3;y9-NH3;a2;b2;b3;b4;b4-NH3;b5;b5-NH3	97843.6;10425.1;90097.1;198538.9;323655;157370.8;105006.6;1091227;14770.2;16987.2;12994.4;43480;42764.4;37230.4;9918.1;3664.2;21355.1;10514;82297;2107.3;723114.4;160184.3;34770.7;34311.6;25835.3;10220.4;7205.7	0.001010927;0.001129856;0.002143944;0.002882124;0.003107523;0.004620596;0.003798111;0.004946485;4.762522E-05;0.0009890146;0.002277968;0.00210471;0.002919414;0.002762166;0.0006393396;-0.0001116237;0.003114224;0.009545824;0.004819378;0.01189155;0.000867288;0.001074635;0.001341674;0.002701544;0.001942849;0.002210891;0.004334003	5.772835;3.920361;6.210327;6.288651;5.29077;6.596794;4.663267;5.675864;0.04837093;6.255967;8.400388;6.412969;6.615799;4.851542;1.121011;-0.1633337;3.905236;11.1846;5.640208;12.29044;5.519463;5.804839;5.540707;7.584557;5.72834;4.711295;9.583285	175.117941254151;288.201886305845;345.22233594124;458.305661741337;587.348029438564;700.430580345593;814.474330277916;871.494645627764;984.583608467974;158.091414064817;271.174189091609;328.195826073781;441.279075350185;569.337810109163;570.323948520569;683.408763464149;797.448465063412;853.479481601747;854.468223632838;967.545215439866;157.132672324722;185.127379600223;242.148576283999;356.19014…	27	0.8064626	0.2727273
20140904-PurClathDigest-1ug-03	5630	3098	0	AIGNIELGIR	10	0	Unmodified	_AIGNIELGIR_					0	0	0	F1N1S2	2	HCD	FTMS	MULTI-MSMS	7	0	528.31402	1054.6135	0.29793	-2.1300198	45.263	0.00011297	159.79	94.637	NaN	NaN	1	0	0	0	-1	0	0	0	0	y1;y3;y4;y5;y6;y7;y8;y9;y1-NH3;y3-NH3;y4-NH3;y5-H2O;y5-NH3;y6-H2O;y7-H2O;y7-NH3;y8-H2O;y8-NH3;a2;b2;b3;b4;b4-NH3;b5	114004.8;105737.9;276964.7;391802.2;209762.4;134365.9;1428561;19752.4;20773;52624.8;49754.6;39471.4;16347.6;5529.2;2237.8;30618.8;18211;110748.8;922558.8;196353.2;47664.9;43320.5;29430.4;10666.6	0.0009644085;0.002043901;0.002873651;0.003221063;0.00461274;0.003695902;0.005232448;0.008829509;0.001294521;0.001835823;0.003106155;0.003529627;0.006768838;0.001406081;0.00923932;0.002655341;0.004618922;0.005408283;0.0008525193;0.001022428;0.001394192;0.001997067;0.002650104;0.001346367	5.507193;5.920535;6.270162;5.484081;6.585578;4.537776;6.003995;8.967839;8.18845;5.593678;7.038984;6.199538;11.86854;2.060424;11.60051;3.329795;5.411841;6.329419;5.425474;5.522831;5.757591;5.606732;7.813643;2.869034	175.117987772484;345.222435983579;458.30567021487;587.347915898281;700.430588201772;814.47443248726;871.494359664908;984.574826584633;158.091108558304;328.196094960227;441.278888608964;569.33704264862;570.317819022545;682.423230174586;796.458324383358;797.448923946297;853.484408504795;854.467634728131;157.132687093414;185.127431807268;242.148523766209;356.190848339051;339.163646200522;469.2755630…	24	0.7972068	0.2376238
20140904-PurClathDigest-1ug-01	4410	1800	0	AIIDGVER	8	0	Unmodified	_AIIDGVER_					0	0	0	F1MGK5	2	HCD	FTMS	MULTI-MSMS	3	0	436.74544	871.47633	-0.069188	-4.2274977	37.556	0.0010929	128.61	18.298	NaN	NaN	1	0	0	0	-1	0	0	0	0	y1;y2;y3;y4;y5;y6;y7;y1-NH3;y2-NH3;y3-NH3;y4-H2O;y4-NH3;y5-H2O;y5-NH3;y6-H2O;y6-NH3;a2;b2	875941.9;143276.4;77873.7;3248710;2886955;3885865;59240.4;93281.2;393628.2;41452.2;14784.3;148150.1;98786.4;164336.3;76552.3;133584.4;4246107;1075505	0.0009825765;0.002277513;0.002936142;0.00249647;0.003016174;0.004086909;-0.0004946506;0.0006565521;0.001874777;0.005200476;-0.0004852403;0.001092866;0.003848109;0.002649845;0.005220847;0.001925802;0.0008465865;0.00101841	5.61094;7.487897;7.281609;5.424172;5.243009;5.937182;-0.6171969;4.152982;6.529295;13.46582;-1.09723;2.465721;6.905362;4.746706;7.788279;2.86862;5.387717;5.501127	175.117969604538;304.159267763979;403.227023051854;460.2489264475;575.275349775362;688.358343020596;801.446988560392;158.091746527337;287.133121398877;386.198209616121;442.241343470976;443.223780949332;557.263953153508;558.249167002546;670.346644396361;671.333955025943;157.132693026148;185.127435825332	18	0.894381	0.3157895
20140904-PurClathDigest-1ug-01	5922	3123	0	AIKELDEWYAR	11	1	Unmodified	_AIKELDEWYAR_					0	0	0	P04973	3	HCD	FTMS	MULTI-MSMS	3	0	465.24186	1392.7038	1.0254	-3.5861068	43.308	0.0037553	102.4	94.436	NaN	NaN	1	0	0	0	-1	0	0	0	0	y1;y2;y3;y4;y5;y6;y7;y8;y1-NH3;y2-NH3;y3-NH3;y5-H2O;y8-H2O;a2;b2;b4;b4-H2O;b5;b6;b7	520459;498699.2;1286171;609967.2;188601.5;136837.5;147178.8;216649.1;101876.5;63422.6;145584.6;150544.4;32737;621059.1;108371.9;160981.5;69828.8;50739.4;76953.7;76058.6	0.001392531;0.001752202;0.002614521;0.00429251;0.004671168;0.009148062;0.008121124;0.005263207;0.001809893;-0.0002710884;0.003219954;0.007368136;0.002900041;0.001252334;0.001719893;0.003776924;0.0035015;0.001262047;0.007203992;0.002703971	7.951975;7.118306;6.389085;7.210734;6.448891;10.89887;8.526613;4.866627;11.44845;-1.183122;8.210196;10.43167;2.726931;7.969936;9.290356;8.54001;8.253351;2.272529;10.7463;3.38243	175.117559650451;246.154313766966;409.216779986346;595.294414950403;724.336629388862;839.35909552678;952.4441864457;1081.4896374582;158.090593186644;229.129787955714;392.189625452017;706.323367734776;1063.48143593817;157.132287278424;185.12673434162;442.262233424656;424.251944161915;555.348812282643;670.369813368701;799.416906485786	20	0.6015677	0.3174603
20140904-PurClathDigest-1ug-01	5923	3124	0	AIKELDEWYAR	11	1	Unmodified	_AIKELDEWYAR_					0	0	0	P04973	2	HCD	FTMS	MULTI-MSMS	4	0	697.35916	1392.7038	-0.34715	-4.1056239	43.311	7.7521E-05	136.02	127.13	NaN	NaN	1	0	0	0	-1	0	0	0	0	y1;y2;y3;y4;y5;y6;y7;y8;y9;y1-NH3;y2-NH3;y3-NH3;y5-H2O;y6-NH3;y8-H2O;y9-H2O;y9(2+);y10(2+);a2;b2;b3;b4;b4-H2O	344374.7;95240.7;154642.7;451325.2;1083631;975069.5;1496565;2209309;1093156;16269.3;56721.5;74227.9;77989.8;38856;254580.3;160451.8;462657.6;20191.3;1098490;75015.9;70084.5;331215.7;94161.4	0.001124841;0.001266128;0.004074475;0.004023041;0.004969398;0.005692132;0.006010734;0.006227857;0.008702189;0.0004632578;0.0008886248;0.00516098;0.002465139;0.003473398;0.004596907;0.02118767;0.003692306;0.001702301;0.0009034774;0.001599702;0.00172455;0.002229301;0.002619219	6.423338;5.143623;9.9568;6.758066;6.860622;6.781494;6.310838;5.758597;7.194382;2.930306;3.878279;13.15947;3.490076;4.223807;4.322515;17.78148;6.100013;2.572078;5.749775;8.641113;5.505845;5.04066;6.173722	175.117827339974;246.154799841187;409.215320031872;595.294684420043;724.336331158791;839.362551456397;952.446296835143;1081.48867280779;1209.5811614944;158.091939821727;229.12862824249;392.187684424994;706.328270731235;822.338221089562;1063.4797390722;1191.5581113249;605.294877768566;661.83889976399;157.132636135307;185.126854532593;313.221692702407;442.263781047134;424.252826443311	23	0.8248127	0.2804878
20140904-PurClathDigest-1ug-02	5517	2895	0	AIKELDEWYAR	11	1	Unmodified	_AIKELDEWYAR_					0	0	0	P04973	2	HCD	FTMS	MULTI-MSMS	4	0	697.35916	1392.7038	-1.5477	-5.8288906	43.794	2.7032E-05	169.52	162.35	NaN	NaN	1	0	0	0	-1	0	0	0	0	y1;y2;y3;y4;y5;y6;y7;y8;y9;y10;y1-NH3;y2-NH3;y3-NH3;y4-NH3;y5-H2O;y5-NH3;y6-NH3;y7-NH3;y8-H2O;y9-H2O;y9-NH3;y10(2+);a2;b2;b3;b4;b4-H2O;b5;b6	72018.5;27553;34275.4;115252;223067.3;211402.2;374175.5;516656.9;379323.4;2752.2;4856.6;7736.8;25338.9;5610.8;13896.8;3699.5;6479.4;6874.5;66143;4943.2;48220.2;4008.5;217919.5;30972.3;10534.7;65700.9;19546.4;3105.9;3059.7	0.001214968;0.0008739649;0.001500935;0.003665278;0.004514012;0.004394242;0.006251126;0.00666997;0.008319486;-0.02195795;0.001247229;-0.0002169437;0.002128127;0.004690345;0.004359682;0.006306689;0.008889656;-0.005638203;0.00715942;0.01389822;0.006253262;-0.0007109635;0.0008694722;0.0008753157;0.0009523355;0.003026422;0.0024586;0.0009441591;0.01304406	6.938004;3.550463;3.667814;6.157078;6.231925;5.235205;6.563234;6.1674;6.877987;-16.60091;7.889303;-0.946816;5.426257;8.111031;6.172334;8.916463;10.81029;-6.027383;6.732087;11.66383;5.243575;-1.074221;5.533364;4.728176;3.040445;6.843038;5.795127;1.700118;19.45817	175.117737213426;246.1551920039;409.217893572176;595.295042182527;724.336786544764;839.363849347244;952.446056443094;1081.48823069528;1209.58154419693;1322.69588561784;158.091155850496;229.129733811005;392.190717278206;578.267468014092;706.326376188462;707.308444766033;822.332804831624;935.431396670791;1063.47717655887;1191.56540078015;1192.55706131964;661.841313028537;157.132670140495;185.127578…	29	0.8189086	0.271028
20140904-PurClathDigest-1ug-02	5536	2912	0	AIKELDEWYAR	11	1	Unmodified	_AIKELDEWYAR_					0	0	0	P04973	3	HCD	FTMS	MULTI-MSMS	7	0	465.24186	1392.7038	-0.49161	-6.3864152	43.868	0.00045142	129.82	115.81	NaN	NaN	1	0	0	0	-1	0	0	0	0	y1;y2;y3;y4;y5;y6;y7;y8;y1-NH3;y2-NH3;y3-NH3;y4-NH3;y5-H2O;y7-H2O;y8-H2O;y9(2+);a2;b2;b4;b4-H2O;b5;b6;b7;b7-H2O	102442.9;107444.7;282438.8;132883.9;41317.5;22290.2;33310.7;44711.8;13213.8;23091.1;19260.1;5417.8;45487;5788.8;6695.4;6130.4;132639.8;11221.9;31698.3;16033.2;12354.6;20463.4;9378.3;4173	0.001066886;0.00170628;0.002398835;0.003438803;0.00514871;0.0009393652;0.006524492;0.01252941;0.0008441433;0.0009930804;0.002032803;0.004099712;0.002413251;-0.001065994;-0.00918309;0.001485465;0.0008631828;0.0007339148;0.00305149;0.00273705;0.001136009;0.00140186;0.008524086;0.001517714	6.092388;6.931748;5.862011;5.776634;7.108177;1.119135;6.85025;11.5854;5.339585;4.334163;5.183199;7.08964;3.416614;-1.140781;-8.634834;2.454109;5.493338;3.96437;6.899719;6.451462;2.045577;2.091156;10.66296;1.942283	175.117885294881;246.154359688837;409.216995672449;595.295268658041;724.336151846831;839.367304223601;952.445783077729;1081.4823712569;158.091558936165;229.128523786857;392.190812602489;578.268058646968;706.328322619355;934.442808877406;1063.49351906974;605.297084609681;157.132676429903;185.127720319977;442.262958858672;424.252708611905;555.348938320151;670.375615501054;799.411086371061;781.40752…	24	0.5806118	0.2553191
20140904-PurClathDigest-1ug-03	5294	2804	0	AIKELDEWYAR	11	1	Unmodified	_AIKELDEWYAR_					0	0	0	P04973	2	HCD	FTMS	MULTI-MSMS	7	0	697.35916	1392.7038	-1.2892	-6.1161017	43.908	2.1142E-06	157.68	147.66	NaN	NaN	1	0	0	0	-1	0	0	0	0	y1;y2;y3;y4;y5;y6;y7;y8;y9;y10;y1-NH3;y2-NH3;y3-NH3;y5-H2O;y5-NH3;y6-NH3;y8-H2O;y8-NH3;y9-H2O;y9-NH3;y10(2+);a2;b2;b3;b4;b4-H2O;b5;b6	50110.3;16805.5;28451.2;76204.1;172802.6;146336.8;273902.6;378673.5;276362.8;1627.4;6700.4;6631;18145.6;7448.1;7201;4721.1;43948.4;7265.7;3941.1;28310.7;1974.2;152407.9;19388.9;5371.3;49902.8;15467.8;4994.7;2100.1	0.001273668;0.001882466;0.003234007;0.004222655;0.005096224;0.004949062;0.006607268;0.007511708;0.008985482;-0.003011094;0.001100755;0.0004041936;0.001900678;0.005943722;0.01412464;0.005425937;0.007483379;0.003719808;0.006294663;0.00834429;0.003450546;0.0009514983;0.001152753;0.001757646;0.002952639;0.003006542;-0.001395543;0.0006344657	7.273213;7.647506;7.902932;7.093388;7.035716;5.89621;6.93716;6.94572;7.428591;-2.276515;6.962781;1.764043;4.846307;8.414999;19.96979;6.598197;7.036711;3.494534;5.28265;6.996985;5.213587;6.055385;6.226811;5.611509;6.676207;7.086682;-2.512901;0.9464321	175.117678512688;246.154183503248;409.216160499788;595.294484805773;724.336204333335;839.363294526792;952.44570030095;1081.4873889568;1209.58087820132;1322.67693875736;158.091302324291;229.12911267364;392.190944727968;706.324792148614;707.300626812359;822.33626855011;1063.47685259976;1064.46463175586;1191.57300433381;1192.5549702917;661.83715151936;157.132588114361;185.127301482066;313.2216596063…	28	0.7942567	0.2393162
20140904-PurClathDigest-1ug-01	7900	4854	0	AIQFYLEFK	9	0	Unmodified	_AIQFYLEFK_					0	0	0	P49951;F1MPU0	2	HCD	FTMS	MULTI-MSMS	5	1	579.81332	1157.6121	0.053904	-2.6341847	50.779	0.0091866	93.178	87.637	NaN	NaN	1	0	0	0	-1	0	0	0	0	y1;y2;y3;y4;y5;y6;y7;y2-NH3;y3-H2O;y3-NH3;y7-H2O;y7-NH3;a2;b2;b3	46287.2;100792.9;59507.3;44762.5;44927.7;48386.3;21198.7;21403.9;53251.4;15906.9;27796.9;25606.7;261152.1;35103.7;19474.7	0.0007700317;0.001902865;0.003787578;0.002663553;0.005114466;0.004078851;0.00363463;0.001444499;0.00261883;0.004089336;0.007002089;0.004997239;0.0008640178;0.001111955;0.00260729	5.234322;6.468384;8.94943;4.966488;7.313003;4.818856;3.729759;5.211913;6.462887;10.06747;7.320681;5.21923;5.498652;6.006433;8.325095	147.112034138877;294.179315222119;423.220023605385;536.30521161007;699.366089235542;846.435538767474;974.494560499853;277.153224486741;405.210627666331;406.19317274515;956.480628354009;957.466648789185;157.132675594864;185.127342279787;313.184424456129	15	0.6325085	0.2380952
20140904-PurClathDigest-1ug-01	6334	3484	0	AKVDFILLK	9	1	Unmodified	_AKVDFILLK_					0	0	0	E1BKN2	2	HCD	FTMS	MULTI-MSMS	7	0	523.83406	1045.6536	0.22972	-3.9403569	44.848	0.0057142	113.93	63.092	NaN	NaN	1	0	0	0	-1	0	0	0	0	y1;y2;y3;y4;y5;y6;y7;y8;y7-H2O;y8(2+);b2;b2-NH3;b3;b4;b4-H2O;b5;b6;b6-H2O;b7;b7-H2O;b7-NH3	290978.1;235415.4;213295.2;55137.1;109149.9;261047.3;400472;17037.7;17401.6;79791.1;275399.2;68612.5;89639.6;32131.5;8643.8;51178.9;91964.5;8680.8;50517.3;10854.9;6824.4	0.0008399094;0.001453643;0.002066314;0.001985198;0.003426738;0.003591388;0.005415608;0.005257283;0.01559315;0.002789708;0.001058475;0.00104695;0.001677565;0.001640853;0.001329147;0.002033275;0.003279531;-0.009181405;0.004008526;0.005555661;0.01315441	5.709321;5.586736;5.535576;4.08172;5.409814;4.798391;6.389922;5.388667;18.79819;5.712954;5.28872;5.717548;5.606722;3.961184;3.354544;3.622432;4.863003;-13.98782;5.090404;7.220253;17.07408	147.111964261221;260.195414507877;373.278865817877;486.363010913958;633.429983289744;748.456761671747;847.52335136836;975.618472710985;829.502609139949;488.31271352212;200.138294796706;183.111757220238;299.20608962296;414.233069366871;396.222816386928;561.301090861145;674.38390858576;656.385804836073;787.467243571377;769.455131750067;770.43154858662	21	0.4544451	0.2121212
20140904-PurClathDigest-1ug-02	5931	3257	0	AKVDFILLK	9	1	Unmodified	_AKVDFILLK_					0	0	0	E1BKN2	2	HCD	FTMS	MULTI-MSMS	2	0	523.83406	1045.6536	-0.018423	-2.6014814	45.455	0.049073	79.201	48.633	NaN	NaN	1	0	0	0	-1	0	0	0	0	y1;y2;y3;y4;y5;y6;y7;y8;y2-NH3;y8(2+);b2;b2-NH3;b3;b4;b4-H2O;b5;b6;b6-H2O;b6-NH3;b7	188512.1;162650.7;163409.2;34156.5;83608.7;170552.8;287788.4;4900.1;3312.9;56547.9;203649.9;36588;65194.7;18510.2;5209.3;29839.9;65652.7;4186.2;4293.4;23027.2	0.0008266838;0.001353499;0.001836598;0.002774701;0.001995261;0.003672292;0.004595686;0.005679321;0.002307375;0.002418523;0.001042361;0.001068491;0.001269472;0.002057037;0.00297697;0.001370622;0.003335061;0.006611673;0.008850534;0.006294989	5.619419;5.201853;4.920173;5.705009;3.149924;4.906485;5.422483;5.821255;9.48881;4.952812;5.208202;5.835186;4.242795;4.965899;7.513405;2.441863;4.945344;10.07309;13.46392;7.993993	147.111977486808;260.19551465209;373.279095533813;486.362221410791;633.43141476705;748.456680768387;847.524171290399;975.618050672769;243.168011674613;488.313084707428;200.138310911289;183.111735679486;299.206497716528;414.232653182943;396.221168563849;561.301753514705;674.383853056369;656.370011757234;657.351788481485;787.46495710779	20	0.4119139	0.1980198
20140904-PurClathDigest-1ug-03	5708	3166	0	AKVDFILLK	9	1	Unmodified	_AKVDFILLK_					0	0	0	E1BKN2	2	HCD	FTMS	MULTI-MSMS	5	0	523.83406	1045.6536	0.24623	-2.4102135	45.57	0.046977	80.037	44.129	NaN	NaN	1	0	0	0	-1	0	0	0	0	y1;y2;y3;y4;y5;y6;y7;y8;y2-NH3;y7-H2O;y8(2+);b2;b2-NH3;b3;b4;b5;b6;b6-H2O;b7	197941.6;148270.6;140169.7;30458.8;67373.8;146622.3;248491.9;8144.5;3462.1;7209.4;36303.1;190082.2;44599.7;61507.2;25943.4;33925.6;52968.3;5937.1;27030.3	0.001050585;0.001675584;0.002524028;0.002399595;0.003814229;0.005397626;0.006320314;0.01103261;0.003839736;0.01255833;0.00135273;0.001292781;0.0009439896;0.001897304;0.003127665;0.003685346;0.004479987;0.002886157;0.004546554	7.141406;6.439719;6.761785;4.933757;6.021551;7.211691;7.457401;11.30839;15.79056;15.13954;2.770203;6.459444;5.155262;6.341131;7.550523;6.56574;6.643092;4.397125;5.773646	147.111753585853;260.195192566985;373.278408103097;486.362596517001;633.429595799441;748.454955433971;847.522446661672;975.612697383125;243.166479313908;829.505643958789;488.314150500733;200.138060491423;183.111860180991;299.205869884567;414.231582555254;561.299438790489;674.382708130442;656.373737273391;787.466705543647	19	0.3641578	0.1862745
20140904-PurClathDigest-1ug-01	5906	3109	0	ALAAELNQLR	10	0	Unmodified	_ALAAELNQLR_					0	0	0	Q28115	2	HCD	FTMS	MULTI-MSMS	3	0	549.81693	1097.6193	0.35543	-3.3344958	43.25	4.8383E-05	175.91	90.237	NaN	NaN	1	0	0	0	-1	0	0	0	0	y1;y2;y3;y4;y5;y6;y7;y8;y9;y1-NH3;y2-NH3;y3-NH3;y4-NH3;y5-NH3;y6-H2O;y6-NH3;y7-H2O;y7-NH3;y8-H2O;y8-NH3;a2;b2;b3;b4;b5	1211752;434420.8;443151.8;2133152;3743073;3688713;4926859;8140223;80669.8;174643.7;173034.5;195342;418846.4;204424.6;435116.9;167024.9;80062.1;235961.6;140877.3;276916.4;6918511;4987134;2171129;208336.8;118694.5	0.0009999187;0.001254205;0.001969567;0.002847919;0.004048556;0.004345165;0.004065365;0.004919517;-0.001562532;0.0007877632;0.001630215;0.002064524;0.001811842;0.003135457;0.003465729;0.0004951076;0.004518317;0.001415842;0.004002425;0.008715126;0.0007803501;0.0009772086;0.001245374;0.00163014;0.003391674	5.709972;4.35183;4.731583;5.370376;6.292591;5.625342;4.819842;5.379458;-1.520578;4.982954;6.011673;5.171226;3.529956;5.005848;4.593916;0.6554208;5.473741;1.713182;4.464546;9.71077;4.966184;5.278572;4.861622;4.982076;7.433938	175.117952262322;288.201761956401;416.259624106072;530.301673200501;643.384536544549;772.426833031412;843.464226619743;914.500486255112;1027.59103228457;158.091615316315;271.174836845437;399.232980047647;513.276160176307;626.358900541415;754.417147780942;755.404133987498;825.453208981468;826.440327040454;896.490838660803;897.470141545327;157.132759262606;185.127477026159;256.164322648519;327.2010…	25	0.849798	0.2604167
20140904-PurClathDigest-1ug-02	5478	2861	0	ALAAELNQLR	10	0	Unmodified	_ALAAELNQLR_					0	0	0	Q28115	2	HCD	FTMS	MULTI-MSMS	5	0	549.81693	1097.6193	0.2636	-3.3344958	43.641	8.0597E-05	174.02	88.347	NaN	NaN	1	0	0	0	-1	0	0	0	0	y1;y2;y3;y4;y5;y6;y7;y8;y9;y1-NH3;y2-NH3;y3-NH3;y4-NH3;y5-NH3;y6-H2O;y6-NH3;y7-H2O;y7-NH3;y8-H2O;y8-NH3;a2;b2;b3;b4;b5	1095180;467585;449822.2;1964862;3482522;3680864;5010774;7951651;97418.5;128073.4;153839.6;190271.5;405427.8;181079.9;362596.7;190726.5;82340;166806.6;120202.6;330040.5;6145046;4605803;2015510;207794.8;78548.7	0.0009254833;0.001358051;0.002336136;0.002399042;0.003368611;0.003797975;0.003503965;0.004741622;0.001494615;0.0006321134;0.00118741;0.003106182;0.003729386;0.002539691;0.004821608;0.0009585871;0.003615323;0.002518178;0.002921055;0.003580468;0.0007350651;0.000916798;0.001146112;0.001919919;-0.0001273574	5.284912;4.712154;5.612214;4.523916;5.235761;4.916934;4.154252;5.18493;1.454489;3.998395;4.378756;7.780395;7.265875;4.054686;6.391181;1.268973;4.379799;3.047021;3.258317;3.989489;4.677986;4.952251;4.474126;5.867709;-0.2791422	175.11802669768;288.201658110946;416.259257536834;530.30212207791;643.385216488974;772.427380221583;843.46478801954;914.500664150643;1027.58797513718;158.091770966065;271.175279649608;399.231938389098;513.274242631916;626.359496307773;754.415791902377;755.403670507997;825.45411197456;826.43922470504;896.491920030778;897.475276202911;157.13280454764;185.127537436762;256.164421910636;327.2007618915…	25	0.8566905	0.25
20140904-PurClathDigest-1ug-03	5242	2758	0	ALAAELNQLR	10	0	Unmodified	_ALAAELNQLR_					0	0	0	Q28115	2	HCD	FTMS	MULTI-MSMS	3	0	549.81693	1097.6193	0.59951	-3.5167084	43.707	5.2369E-05	174.41	68.894	NaN	NaN	1	0	0	0	-1	0	0	0	0	y1;y2;y3;y4;y5;y6;y7;y8;y9;y1-NH3;y2-NH3;y3-NH3;y4-NH3;y5-NH3;y6-H2O;y6-NH3;y7-H2O;y7-NH3;y8-H2O;y8-NH3;a2;b2;b3;b4;b5;b8;b9	280352.9;99700.3;100500.4;478559.9;842308.8;877815.9;1182239;1901771;22067.5;34431.6;33496;44620.6;83625.9;41871;88808.8;42080.1;19287.9;46790.5;32188.5;64769.2;1483863;1090031;466573.4;45112;21807;7407.5;16311.2	0.001128951;0.001398902;0.002279417;0.003044041;0.004352498;0.004813814;0.00475022;0.005847922;0.003945644;0.0007928588;0.001405408;0.002162442;0.003727775;0.002835426;0.004546023;-0.001033998;0.006783071;0.004697803;0.00227597;0.005792791;0.0009126943;0.001130249;0.001468324;0.002368843;0.00236606;0.01548874;0.01693444	6.446811;4.853902;5.475954;5.740209;6.765006;6.232068;5.631803;6.394669;3.839723;5.015186;5.18266;5.416492;7.262736;4.526838;6.025882;-1.368798;8.217412;5.684405;2.538749;6.454557;5.808433;6.105253;5.731966;7.239732;5.185965;19.08855;18.31745	175.117823229505;288.201617258963;416.259314256131;530.301477078886;643.384232602024;772.426364383193;843.46354176427;914.499557850538;1027.58552410883;158.091610220727;271.175061651877;399.232882129752;513.274244243299;626.359200572521;754.416067487636;755.405663093001;825.450944227695;826.437045080182;896.492565116167;897.473063879423;157.132626918444;185.127323985602;256.164099698845;327.20031…	27	0.8486678	0.2268908
20140904-PurClathDigest-1ug-01	4880	2211	0	ALALAPGPPAR	11	0	Unmodified	_ALALAPGPPAR_					0	0	0	G3MYP5	2	HCD	FTMS	MULTI-MSMS	1	0	517.31128	1032.608	-0.29078	-4.4228198	39.359	0.0033672	111.61	104.94	NaN	NaN	1	0	0	0	-1	0	0	0	0	y1;y3;y4;y5;y6;y7;y8;y9;y1-NH3;y3-NH3;y4-NH3;y5-NH3;y6-NH3;y7-NH3;y6(2+);y7(2+);a2;b2;b3;b4	91975.3;31532.2;120577.2;222364.5;2368679;658622.5;362751.2;527275.9;4996.1;46869.5;169699.2;49572.2;218809.6;47599.1;327458.7;23920.1;620242.7;939581.6;1237387;146416.5	0.0009026097;0.001652368;0.004512181;0.003077545;0.003147298;0.003780904;0.00482819;0.003937705;0.0006979879;-0.002930077;0.002092839;0.001136813;0.003530447;0.005649877;0.001550125;0.002800975;0.0008387642;0.0009988674;0.001326994;0.002038756	5.154293;4.814491;10.24897;6.188756;5.295515;5.682416;6.202296;4.635375;4.415082;-8.982862;4.944887;2.3671;6.115386;8.714364;5.20753;8.406607;5.337935;5.395566;5.180246;5.52138	175.118049571272;343.207177452815;440.257081491934;497.2799798517;594.332673950781;665.369154131928;778.452170826173;849.490175098863;158.091705091612;326.185210796009;423.232951732216;480.255371482248;577.30574169981;648.340736057632;297.669998732144;333.18730477676;157.132700848432;185.127455367302;256.164241028643;369.247593246563	20	0.8181506	0.2439024
20140904-PurClathDigest-1ug-02	4511	2015	0	ALALAPGPPAR	11	0	Unmodified	_ALALAPGPPAR_					0	0	0	G3MYP5	2	HCD	FTMS	MULTI-MSMS	6	0	517.31128	1032.608	0.23156	-3.6480825	39.756	0.0039663	109.66	103	NaN	NaN	1	0	0	0	-1	0	0	0	0	y1;y2;y3;y4;y5;y6;y7;y8;y9;y1-NH3;y3-NH3;y4-NH3;y5-NH3;y6-NH3;y7-NH3;y9-NH3;a2;b2;b3;b4	110498.4;7574.9;40195.7;254913.5;295602.9;407093;987859.1;482347.3;708849.8;9583.2;54385.5;238474.8;86086.8;277479.6;66271.4;3153.4;761587.8;1149676;1599244;191011.8	0.001010165;-0.0009800502;0.002353905;0.003714572;0.003381349;0.003323602;0.004114745;0.004828981;0.004303974;0.0006982476;0.0007216709;0.00236389;0.00305479;0.003345851;0.003354294;-0.005045556;0.0008438088;0.001031645;0.0013668;0.001907262	5.768483;-3.981402;6.858569;8.437264;6.799692;5.592158;6.184157;6.203311;5.066539;4.416725;2.212482;5.58532;6.360786;5.795629;5.173641;-6.060927;5.370039;5.57262;5.335642;5.165263	175.117942016124;246.157046019004;343.206475915594;440.2578791009;497.27967604769;594.332497646839;665.368820291232;778.452170035651;849.489808830721;158.091704831886;326.181559048456;423.232680681245;480.253453505367;577.305926296022;648.343031640883;832.472609258683;157.132695803873;185.127422589902;256.164201222232;369.2477247415	20	0.584961	0.212766
20140904-PurClathDigest-1ug-03	4292	1927	0	ALALAPGPPAR	11	0	Unmodified	_ALALAPGPPAR_					0	0	0	G3MYP5	2	HCD	FTMS	MULTI-MSMS	5	0	517.31128	1032.608	0.46719	-4.0354512	39.787	0.0039663	109.66	101.34	NaN	NaN	1	0	0	0	-1	0	0	0	0	y1;y2;y3;y4;y5;y6;y7;y8;y9;y1-NH3;y3-NH3;y4-NH3;y5-NH3;y6-NH3;y7-NH3;y6(2+);a2;b2;b3;b4	62751.9;2168.1;22130;88810;130771.3;1470715;438465.7;232101.3;312177.5;3396;29533.1;115399.8;35102.1;137827.1;25561.8;194372.9;384860.5;604072.3;811769.2;86191.1	0.001159087;0.001096568;0.001347988;0.004836572;0.002645648;0.003071083;0.003813521;0.004713246;0.004639835;0.00209793;0.0004921128;0.00168248;0.003331523;0.003249413;0.003010476;0.001556044;0.0008236533;0.001004903;0.001305869;0.00165558	6.618899;4.454789;3.927617;10.9858;5.320233;5.16728;5.731436;6.054636;5.46191;13.27045;1.508707;3.975302;6.937015;5.62858;4.643336;5.227412;5.241768;5.428167;5.09778;4.483653	175.117793094031;246.154969400353;343.207481833156;440.256757100784;497.280411748847;594.332750164855;665.369121515573;778.452285771096;849.489472969148;158.090305149636;326.181788606536;423.233362091133;480.253176771563;577.306022733979;648.343375458226;297.669992813743;157.132715959404;185.127449331982;256.16426215349;369.247976423197	20	0.8251642	0.2597403
20140904-PurClathDigest-1ug-02	6195	3488	0	ALEAELAALR	10	0	Unmodified	_ALEAELAALR_					0	0	0	Q08DH7	2	HCD	FTMS	MULTI-MSMS	2	0	528.80603	1055.5975	0.92945	-4.2269259	46.469	2.2241E-05	179.09	106.16	NaN	NaN	1	0	0	0	-1	0	0	0	0	y1;y2;y3;y4;y5;y6;y7;y8;y9;y1-NH3;y2-NH3;y3-NH3;y4-NH3;y5-NH3;y6-H2O;y7-H2O;y8-H2O;a2;b2;b3;b3-H2O;b4;b4-H2O;b5;b5-H2O;b7;b8;b9;b6(2+);b8(2+)	214098.6;59864.4;165842.4;385142.9;461599.1;415455.9;850256.9;969208.6;12375.7;25008.5;64516.3;48805.8;35052.1;13285.2;47679.4;14024.4;155523.3;1109999;540385.1;214272.8;29803.2;83526.5;19434.1;31131.2;30979;7542.2;9641.6;17884.9;214272.8;83526.5	0.001123159;0.001169028;0.002252506;0.002572507;0.003496495;0.004358603;0.004186573;0.004387787;0.00613002;0.001251201;0.001133007;0.001896132;0.004145752;0.003443692;0.001562697;0.01075035;0.003755432;0.0008565202;0.001083775;0.002120086;0.001351948;0.001733831;0.002199928;0.003943893;0.00138951;-0.002502971;0.01350082;0.001327485;0.002120086;0.001733831	6.413734;4.056284;6.270234;5.978755;6.434977;6.482162;5.631376;5.029102;6.219824;7.914431;4.178135;5.540817;10.03215;6.542821;2.388015;14.81949;4.395046;5.450936;5.854214;6.748237;4.564938;4.501043;5.991165;7.669261;2.800082;-3.583995;17.5473;1.504247;6.748237;4.501043	175.117829021837;288.201847132905;359.237877443511;430.274671230349;543.357811222634;672.399542210794;743.436828029101;872.479219910478;985.561541658321;158.091151878054;271.175334052685;342.211684715465;413.246548883189;526.331314923956;654.391773429806;725.419699565768;854.469287579585;157.132683092496;185.127370459507;314.168927244815;296.159130696782;385.206427288082;367.195396504182;514.2468…	30	0.8497497	0.3636364
20140904-PurClathDigest-1ug-03	5920	3351	0	ALEAELAALR	10	0	Unmodified	_ALEAELAALR_					0	0	0	Q08DH7	2	HCD	FTMS	MULTI-MSMS	1	0	528.80603	1055.5975	0.14797	-4.2269259	46.397	0.00014607	151.22	92.97	NaN	NaN	1	0	0	0	-1	0	0	0	0	y1;y2;y3;y4;y5;y6;y7;y8;y9;y1-NH3;y2-NH3;y3-NH3;y4-NH3;y5-NH3;y6-H2O;y7-H2O;y8-H2O;a2;b2;b3;b3-H2O;b4;b4-H2O;b5;b5-H2O;b6;b7;b6(2+);b8(2+)	306821.2;86319.6;263227.3;557989.9;621135.6;676822.1;1221005;1445436;21786.5;38370.2;108956.8;57677.2;48395.8;20811.7;74917.8;31605.5;230882.6;1700905;860010.4;325857.1;39301;108967.5;20493;55859.6;40145;6089.4;8502.5;325857.1;108967.5	0.001159746;0.001717449;0.001944478;0.002770869;0.003508504;0.004370468;0.004239609;0.004492639;0.009763814;0.0009368571;0.001226518;0.0007194157;0.004034113;0.008740412;0.004102438;0.01004652;0.004057072;0.0009033685;0.001158559;0.002037771;0.0008537837;0.002374653;0.003234192;0.003445831;0.002588254;0.0008649132;-0.002231103;0.002037771;0.002374653	6.622662;5.959198;5.412783;6.439772;6.457079;6.499808;5.702716;5.14928;9.90689;5.926044;4.522973;2.102246;9.761997;16.60646;6.26911;13.84923;4.748063;5.749082;6.258173;6.486226;2.88285;6.164634;8.807846;6.700728;5.215755;1.378713;-3.19471;6.486226;6.164634	175.117792435118;288.201298712873;359.238185470848;430.274472867605;543.357799212971;672.39953034562;743.436774992215;872.479115058404;985.557907864887;158.091466222412;271.175240541716;342.212861432045;413.246660522705;526.326018204156;654.389233689516;725.420403397419;854.468985939182;157.132636244225;185.127295676038;314.169009559728;296.159628860977;385.205786466232;367.194362241015;514.24730…	29	0.8560011	0.369863
20140904-PurClathDigest-1ug-01	4737	2086	0	ALEESNYELEGK	12	0	Unmodified	_ALEESNYELEGK_					0	0	0	CON__P13645;CON__P02535-1	2	HCD	FTMS	MULTI-MSMS	2	0	691.32772	1380.6409	0.50684	-6.5497767	38.808	0.0017973	106.26	99.78	NaN	NaN	1	0	0	0	-1	0	0	0	0	y1;y2;y3;y4;y5;y6;y7;y8;y9;y10;y3-H2O;y5-H2O;y7-NH3;y8-H2O;y8-NH3;y9-H2O;y10-NH3;a2;b2;b3;b10;b10-NH3	97191.2;592109.4;399183.8;518701.3;311472.9;247236.2;176321;503221;351539.7;356256;333463.6;119090.2;19136.6;22045.9;25394;101092.1;17280;2162096;1015515;125594.9;123431.9;33828.9	0.0006473197;0.001117521;0.0022533;0.002639151;0.005052265;0.004974459;0.007010498;0.006001673;0.009761509;0.006985491;0.002166303;0.005095391;-0.002541431;0.004212968;0.005644972;0.003503025;0.005746754;0.0009339917;0.00120238;0.00168487;0.00970999;-0.005041153	4.400178;5.474471;6.763121;5.913953;8.78199;6.737156;8.224396;6.388593;9.135929;5.833298;6.873572;9.143193;-3.042225;4.57222;6.119811;3.33472;4.86809;5.943971;6.494882;5.362934;8.239199;-4.34021	147.112156850937;204.13315037319;333.174607690054;446.258285820038;575.298465801914;738.361872145969;852.402763554895;939.435800789229;1068.47463405043;1197.52000316384;315.164130000858;557.287857990215;835.3857663825;921.427024808435;922.409608388604;1050.47032784752;1180.49469279898;157.132605621019;185.127251855218;314.169362461405;1178.51146500555;1161.4996670471	22	0.6407003	0.2268041
20140904-PurClathDigest-1ug-02	4354	1877	0	ALEESNYELEGK	12	0	Unmodified	_ALEESNYELEGK_					0	0	0	CON__P13645;CON__P02535-1	2	HCD	FTMS	MULTI-MSMS	1	0	691.32772	1380.6409	1.091	-5.1011741	39.117	0.00015441	123.95	116.66	NaN	NaN	1	0	0	0	-1	0	0	0	0	y1;y2;y3;y4;y5;y6;y7;y8;y9;y10;y3-H2O;y5-H2O;y7-NH3;y8-H2O;y8-NH3;y9-H2O;y9-NH3;a2;b2;b3;b7;b10;b10-NH3	66651.8;331419.4;195348.2;338808.9;198240;182996;112456.2;277105.5;206582.2;264564.4;193639.7;64654.8;29140.8;18648.7;24332.9;50698.7;14425.3;1242237;581553.2;84514.5;8133.2;105543.7;20860.7	0.0008744998;0.00112459;0.001786824;0.002303757;0.003810524;0.005052074;0.00527494;0.004946202;0.006051296;0.006386992;0.002089915;0.004329525;0.004624623;0.01277872;0.01130617;0.005179362;0.005762822;0.0008132859;0.001043106;0.001714944;0.01144217;0.01339748;-0.01265421	5.944452;5.5091;5.363018;5.162382;6.623546;6.842275;6.188306;5.265071;5.663471;5.333513;6.631195;7.768909;5.535961;13.86853;12.25728;4.930525;5.480822;5.175789;5.634529;5.458663;14.17267;11.36817;-10.89465	147.111929670803;204.133143304303;333.175074166378;446.258621213457;575.299707543017;738.361794531065;852.404499112209;939.436856260204;1068.47834426201;1197.52060166296;315.164206388696;557.288623855957;835.378600327889;921.418459060085;922.403947193566;1050.4686515101;1051.45208363556;157.13272632684;185.127411129087;314.169332386477;807.340482649062;1178.50777751466;1161.50728010398	23	0.6270444	0.1900826
20140904-PurClathDigest-1ug-03	4168	1818	0	ALEESNYELEGK	12	0	Unmodified	_ALEESNYELEGK_					0	0	0	CON__P13645;CON__P02535-1	2	HCD	FTMS	MULTI-MSMS	1	0	691.32772	1380.6409	1.9228	-4.9563139	39.27	0.00012533	127.17	121.09	NaN	NaN	1	0	0	0	-1	0	0	0	0	y1;y2;y3;y4;y5;y6;y7;y8;y9;y10;y2-NH3;y3-H2O;y5-H2O;y6-H2O;y7-NH3;y8-H2O;y9-H2O;a2;b2;b3;b10;b10-NH3	66802.6;415934.8;273405;401863.8;270070;226175.1;133305;401717.2;266521.7;290750.4;12252.8;248036.6;88969.8;12602.4;36392.7;41843.2;87347;1583386;805628.4;121986.9;102962;26385.3	0.001144267;0.001168218;0.002361566;0.003033222;0.003623059;0.004408115;0.00283855;0.006507507;0.009325203;0.006173079;0.000356166;0.00194405;0.005737346;-0.003883132;0.01437282;0.01636101;0.007015872;0.0009277545;0.001154365;0.00250221;0.0125721;-0.002386081	7.778223;5.722825;7.088075;6.797015;6.297688;5.970123;3.330041;6.927041;8.727582;5.154883;1.903538;6.168368;10.29513;-5.390542;17.20536;17.7564;6.678814;5.904277;6.23552;7.964545;10.6678;-2.054316	147.111659903347;204.133099676199;333.174499424534;446.257891749045;575.29989500789;738.362438490487;852.406935502449;939.435294955134;1068.47507035528;1197.52081557546;187.107362626734;315.164352254494;557.287216035107;720.360165050647;835.368852128902;921.414876761988;1050.46681500021;157.132611858187;185.127299869764;314.168545121461;1178.50860289669;1161.49701197508	22	0.6332725	0.1964286
20140904-PurClathDigest-1ug-01	4288	1693	0	ALEGEEEEETANVQMSEK	18	0	Oxidation (M)	_ALEGEEEEETANVQM(ox)SEK_		ALEGEEEEETANVQM(1)SEK		ALEGEEEEETANVQM(72.36)SEK	0	0	1	F1N3M8;G3MYP5	2	HCD	FTMS	MULTI-MSMS	1	0	1019.9415	2037.8685	-0.28123	-5.5021104	37.09	0.049635	72.359	66.396	72.359	1	1	0	0	0	-1	0	0	0	0	y1;y3;y4;y5;y6;y7;y8;y9;y10;y11;y12;y13;y15;y5-H2O;y5-NH3;y11-H2O;a2;b2;b3;b4;b5;b7	22407.9;70789.2;128010.3;108174.1;44904.2;114644.2;74847.3;121920.6;95503.6;58651.3;54922.1;50118.7;24757.1;35740.4;34809.4;17085.2;228910.3;171596.3;23421.4;25799.6;14947.3;14976.8	0.0004471912;0.0006629264;-0.0008117956;0.002887169;0.002417306;0.005910469;0.006331332;0.005108223;0.01233052;0.004706309;0.002039613;0.02701565;0.02623524;0.004798211;0.002989447;0.01126198;0.0008085925;0.001119821;0.002089388;0.003339779;0.007375375;0.0054615	3.039794;1.825304;-1.591058;4.523369;3.278382;6.942167;6.863801;4.99107;10.69886;3.672334;1.445915;17.54695;15.20279;7.73573;4.811972;8.913031;5.14592;6.048921;6.650523;8.997511;14.74403;7.202155	147.112356979392;363.186762750363;510.223636700616;638.278515247085;737.347399026202;851.386833310691;922.423526235794;1023.47242781909;1152.50779861596;1281.55801592495;1410.60327571756;1539.62089277429;1725.68573000577;620.266039519533;621.251863868255;1263.54089556893;157.132731020224;185.127334414191;314.16895794321;371.189171275921;500.227728775734;758.314828842642	22	0.4346737	0.255814
20140904-PurClathDigest-1ug-01	6449	3584	0	ALEHFTDLYDIK	12	0	Unmodified	_ALEHFTDLYDIK_					0	0	0	P49951;F1MPU0	2	HCD	FTMS	MULTI-MSMS	2	0	732.8721	1463.7296	-0.31604	-2.8682328	45.275	6.2572E-05	142.12	117.86	NaN	NaN	1	0	0	0	-1	0	0	0	0	y1;y2;y3;y4;y5;y6;y7;y8;y9;y10;y2-NH3;y3-H2O;y6-NH3;y7-H2O;y8-H2O;y8-NH3;y9-H2O;y10-NH3;y10(2+);a2;b2;b3;b4;b4-H2O;b5;b6;b6-H2O;b7;b7-H2O;b8;b8-H2O;b9;b10;b10-H2O	2527667;2356527;545183.1;344371.9;376376.2;248892.6;831287.5;1134475;649438;127657.7;36195.8;30363.4;28860.5;23726.3;38922.3;54008.8;46958;24568.7;27764.2;1338065;690248.4;47527.8;1215862;63194.3;785796.6;335525.9;47473.9;1731746;222108.2;1315734;81208.1;268449.8;1490508;210463.1	0.0008412074;0.001315501;0.002304191;0.001234989;0.002266846;0.006911024;0.004557898;0.005178953;0.008989872;0.008738439;0.002268671;0.001483929;0.007091599;-0.01483776;0.002992572;-0.006828696;0.004499474;-0.02483304;0.004622594;0.0008318829;0.001014152;0.00320953;0.002500162;0.001201289;0.00267946;0.004300394;-0.001457494;0.003616006;0.0076795;0.005430934;-0.0008808232;-0.002378465;0.008138868;…	5.718144;5.055816;6.140883;2.2943;3.480126;9.017619;5.254416;5.104886;7.806662;6.823669;9.329643;4.1542;9.463484;-17.46749;3.003081;-6.845848;3.969337;-19.6524;7.213708;5.294142;5.478128;10.21597;5.540802;2.772943;4.478488;6.149202;-2.139168;4.440253;9.643315;5.85576;-0.9685258;-2.181032;6.751226;7.448923	147.111962963215;260.195552650335;375.22150699155;538.285904732187;651.368936855556;766.391235709561;867.441267309814;1014.50906017092;1151.56416111418;1280.60700564406;243.168050378556;357.211762567848;749.364506032934;849.450098283034;996.500681865408;997.494518718724;1133.55808682629;1263.61402802335;640.806887680833;157.132707729758;185.127440082911;314.167837800552;451.227459031145;433.21819…	34	0.5545915	0.2411347
20140904-PurClathDigest-1ug-01	6512	3639	0	ALEHFTDLYDIK	12	0	Unmodified	_ALEHFTDLYDIK_					0	0	0	P49951;F1MPU0	2	HCD	FTMS	MULTI-MSMS	1	0	732.8721	1463.7296	-0.31604	-2.5949583	45.512	0.00022621	113.99	89.733	NaN	NaN	1	0	0	0	-1	0	0	0	0	y1;y2;y3;y4;y5;y6;y7;y8;y9;y10;y8-H2O;a2;b2;b4;b5;b6;b6-H2O;b7;b7-H2O;b8;b8-H2O;b9;b9-H2O;b10;b10-H2O	1.214838E+07;1.131303E+07;2819659;1851005;1644433;1019304;3169519;5130644;3780031;487115.6;223214.5;6324853;2912414;5648258;3723248;961002.9;371998.4;7190905;1105337;5852464;405294.7;932654.2;175562.4;6317215;715536.1	0.0008587541;0.00148413;0.001792874;0.004390072;0.001531871;0.007547425;0.006172379;0.004416449;0.006274405;0.009260044;0.00858873;0.0008401544;0.001316056;0.002934898;0.00320437;0.006757366;-0.002716013;0.003773022;0.0016985;0.006775373;-0.0006443165;0.01389582;0.01818534;0.009164986;-0.002556018	5.837419;5.703907;4.778168;8.155698;2.351769;9.848014;7.11563;4.353284;5.448581;7.230984;8.618939;5.346783;7.108932;6.504259;5.355835;9.6625;-3.986292;4.633061;2.132827;7.305376;-0.7084706;12.74254;16.95616;7.602402;-2.152365	147.111945416517;260.195384020682;375.222018309332;538.282749649695;651.369671830796;766.390599308734;867.439652828385;1014.50982267439;1151.56687658096;1280.60648403829;996.49508570765;157.132699458357;185.127138178639;451.227024295897;598.295168739255;699.33929421717;681.338202910229;814.369221593279;796.360731429479;927.450283223394;909.447138226371;1090.50649131616;1072.49163710904;1205.53816…	25	0.5672688	0.2173913
20140904-PurClathDigest-1ug-01	6450	3585	0	ALEHFTDLYDIK	12	0	Unmodified	_ALEHFTDLYDIK_					0	0	0	P49951;F1MPU0	3	HCD	FTMS	MULTI-MSMS	3	0	488.91716	1463.7296	-0.088926	-3.1937483	45.278	0.00215	87.719	75.451	NaN	NaN	1	0	0	0	-1	0	0	0	0	y1;y2;y3;y4;y5;y6;y7;y8;y9;y2-NH3;y3-H2O;y7-H2O;y8-H2O;a2;b2;b4;b5;b6;b7;b7-H2O;b8	3257581;4333902;1172572;1853058;839485;523840.2;866285.6;1299411;618330.9;41310.8;65719.7;122745.5;143619.6;4170824;635106.3;761635.9;444275;146321.2;1365569;233386.5;102337.7	0.0008102109;0.001342858;0.001868856;0.002649155;0.003372157;0.001947981;0.003120305;0.004065761;0.004024875;-0.001843868;0.001534835;0.01201751;0.01227303;0.0008013882;0.001009987;0.002305085;0.001297282;0.005389111;0.002762427;0.003831541;0.0007166975	5.507443;5.160957;4.980668;4.921477;5.177039;2.541742;3.597131;4.00761;3.495123;-7.582564;4.29671;14.14785;12.31624;5.100072;5.455631;5.108475;2.168291;7.705988;3.392102;4.811327;0.772756	147.111993959646;260.19552529317;375.221942326968;538.284490566448;651.367831545009;766.396198752419;867.442704902563;1014.51017336305;1151.56912611083;243.172162917891;357.211711661442;849.423243011431;996.49140141101;157.132738224488;185.127444247829;451.227654108162;598.297075827558;699.340662472512;814.370232189154;796.358598388192;927.456341898635	21	0.4637942	0.1764706
20140904-PurClathDigest-1ug-01	6513	3640	0	ALEHFTDLYDIK	12	0	Unmodified	_ALEHFTDLYDIK_					0	0	0	P49951;F1MPU0	3	HCD	FTMS	MULTI-MSMS	2	0	488.91716	1463.7296	-0.088926	-3.1937483	45.515	0.009329	74.392	62.124	NaN	NaN	1	0	0	0	-1	0	0	0	0	y1;y2;y3;y4;y5;y6;y7;y8;y8-H2O;y9(2+);a2;b2;b4;b5;b6;b7	5264471;6274529;1544667;2352460;806589.8;691111.9;1198433;1454018;215009.3;980249.9;6027138;828133.9;889658.9;896532.7;194645.6;2095411	0.0009215692;0.001586963;0.002749768;0.003560344;0.0004198675;0.002253638;0.005105326;0.007683515;-0.0002905161;0.005209019;0.0009586164;0.00107236;0.002283124;0.005091381;-0.0123449;0.003776524	6.26441;6.099123;7.328394;6.614253;0.6445907;2.940567;5.885505;7.573647;-0.2915353;9.038964;6.100686;5.79255;5.059805;8.509841;-17.65174;4.637361	147.111882601357;260.195281187866;375.221061415098;538.283579377505;651.370783834198;766.395893095563;867.440719881507;1014.5065556096;996.503964953787;576.285004707119;157.132580996286;185.127381875216;451.227676069348;598.293281728675;699.358396480027;814.369218091593	16	0.4380511	0.1758242
20140904-PurClathDigest-1ug-01	6590	3708	0	ALEHFTDLYDIK	12	0	Unmodified	_ALEHFTDLYDIK_					0	0	0	P49951;F1MPU0	3	HCD	FTMS	MULTI-MSMS	7	0	488.91716	1463.7296	-0.088926	-5.2433071	45.796	0.022016	54.343	42.074	NaN	NaN	1	0	0	0	-1	0	0	0	0	y1;y2;y3;y4;y5;y6;y7;y8;y9(2+);a2;b2;b4;b7	131599.5;165419.5;55186.5;51164.3;25728.2;31571;27811.1;36055.5;17573.8;180449.1;25671.8;21217.2;68020.6	0.0007629431;0.001774288;0.001480072;0.002068582;0.003613584;0.01400751;0.008326462;0.00859615;0.004315063;0.0008822197;0.001183656;0.004876785;0.005626872	5.186136;6.819067;3.944521;3.842911;5.547688;18.2774;9.598919;8.473241;7.487713;5.61449;6.393741;10.80788;6.909501	147.112041227489;260.195093863185;375.222331110579;538.285071139831;651.36759011744;766.384139227684;867.437498745773;1014.50564297392;576.285898663362;157.132657392987;185.127270578945;451.225082407876;814.367367744187	13	0.4409286	0.1857143
20140904-PurClathDigest-1ug-01	6667	3775	0	ALEHFTDLYDIK	12	0	Unmodified	_ALEHFTDLYDIK_					0	0	0	P49951;F1MPU0	3	HCD	FTMS	MULTI-MSMS	4	0	488.91716	1463.7296	-0.088926	-3.8086159	46.091	0.014205	58.04	45.772	NaN	NaN	1	0	0	0	-1	0	0	0	0	y1;y2;y3;y4;y5;y6;y7;y8;y9(2+);a2;b2;b4;b5;b7;b8	83454.5;87470.2;19165.3;29151.4;9279.4;4654.5;19393.6;25407.4;9010.4;83942.3;11275.2;10097.8;4800.4;28042.7;10381.3	0.0009953759;0.001556965;0.00385151;0.003823685;0.0002630979;-0.01065433;0.01353821;0.003340136;0.004792417;0.0006701242;0.001009613;0.002966692;-0.004995835;0.006313498;-0.01407414	6.766119;5.983832;10.26467;7.10348;0.4039141;-13.90162;15.60722;3.292361;8.316048;4.264698;5.453613;6.574722;-8.350003;7.752648;-15.17475	147.111808794702;260.19531118606;375.219959673339;538.28331603652;651.370940603762;766.408801060647;867.432287000742;1014.51089898788;576.285421309407;157.132869488515;185.127444621447;451.226992501419;598.303368944624;814.366681117405;927.47113274106	15	0.3809541	0.1923077
20140904-PurClathDigest-1ug-02	6030	3344	0	ALEHFTDLYDIK	12	0	Unmodified	_ALEHFTDLYDIK_					0	0	0	P49951;F1MPU0	2	HCD	FTMS	MULTI-MSMS	5	0	732.8721	1463.7296	-0.98321	-1.911772	45.832	1.21E-06	163.51	129.51	NaN	NaN	1	0	0	0	-1	0	0	0	0	y1;y2;y3;y4;y5;y6;y7;y8;y9;y10;y2-NH3;y6-NH3;y7-H2O;y8-H2O;y9-H2O;y10-H2O;y10(2+);a2;b2;b3;b4;b4-H2O;b5;b6;b6-H2O;b7;b7-H2O;b8;b8-H2O;b9;b9-H2O;b10;b10-H2O;b11	4338536;4330383;1229436;820886.9;902912.9;482769.2;1835854;2414971;1981880;298717.6;129612.4;138826;60130.8;171438.9;266001.6;88894;80824.5;2172750;1205084;121620.5;2291549;84945.2;1572481;668636.9;233177.9;3388425;453929.3;2583320;299392.4;516993.6;39996.3;2955538;417722.2;124143.8	0.0005474982;0.0008516143;0.001745483;0.001509755;0.001930281;0.003929626;0.003467354;0.003155441;0.004414371;0.003729641;-0.004626203;0.01328173;0.002607587;0.0004943614;0.000856735;0.01166857;0.0006002944;0.0005463443;0.0007072946;0.0008367239;0.001741695;0.001529272;0.002043934;0.002549311;0.002550743;0.002298472;0.003128163;0.003601763;0.003650505;0.00324904;-0.004601438;0.005569264;0.0027677…	3.721636;3.272972;4.651868;2.804746;2.96342;5.127421;3.997215;3.110307;3.833354;2.91239;-19.02418;17.72414;3.069798;0.4960961;0.7557904;9.241746;0.9367731;3.476955;3.820576;2.663282;3.859899;3.53003;3.416256;3.645292;3.743754;2.82239;3.92808;3.883497;4.014001;2.979357;-4.290328;4.619719;2.330706;-3.330733	147.112256672378;260.196016536736;375.222065699485;538.28562996669;651.369273420914;766.394217107708;867.44235785422;1014.51108368316;1151.56873661584;1280.61201444146;243.174945252879;749.358315903379;849.432652934373;996.503180076317;1133.56172956507;1262.59351082757;640.8109099802;157.132993268405;185.127746940208;314.170210607111;451.228217498257;433.217865234855;598.296329175877;699.34350227…	34	0.5445009	0.1976744
20140904-PurClathDigest-1ug-02	6091	3397	0	ALEHFTDLYDIK	12	0	Unmodified	_ALEHFTDLYDIK_					0	0	0	P49951;F1MPU0	2	HCD	FTMS	MULTI-MSMS	2	0	732.8721	1463.7296	-0.98321	-2.4583211	46.071	1.9133E-06	156.36	132.11	NaN	NaN	1	0	0	0	-1	0	0	0	0	y1;y2;y3;y4;y5;y6;y7;y8;y9;y10;y6-NH3;y7-H2O;y10-H2O;y9(2+);a2;b2;b4;b4-H2O;b5;b6;b6-H2O;b7;b7-H2O;b8;b8-H2O;b9;b10;b10-H2O	4940910;4731841;1385628;677393.6;634693.7;330717.3;1653356;2091958;810183.9;200958;73185.8;70263.8;109018.9;812209.9;2445711;1757594;2594038;128729.5;1553369;658783.5;177152.6;3231840;340527.3;2256753;208810.8;256668.5;3007191;348436.8	0.0008104242;0.001287097;0.001237635;0.003118798;0.003088929;0.001995925;0.004239846;0.004206653;0.005878432;0.01672973;0.008637079;-0.0003159856;0.02345569;0.004412777;0.0008214911;0.001034832;0.002248466;6.641615E-05;0.00254635;0.005943567;-0.002157364;0.003710093;0.003984174;0.006204058;0.01782818;0.008601721;0.006799313;-0.0003345586	5.508893;4.946651;3.298403;5.793963;4.742217;2.604299;4.88776;4.146488;5.104723;13.06399;11.5259;-0.3719948;18.57756;7.657272;5.228008;5.589837;4.982997;0.1533084;4.256004;8.498822;-3.166365;4.555787;5.002991;6.689366;19.60372;7.887784;5.640054;-0.2817247	147.111993746463;260.195581054135;375.222573547848;538.284020923608;651.368114772745;766.396150809014;867.441585361414;1014.51003247067;1151.56727255462;1280.59901434843;749.362960553409;849.435576507113;1262.58172370565;576.285800949247;157.132718121608;185.127419402662;451.227710727172;433.219328090953;598.295826759818;699.340108016796;681.337644261041;814.3692845226;796.358445755846;927.450854…	28	0.5558532	0.2295082
20140904-PurClathDigest-1ug-02	6034	3347	0	ALEHFTDLYDIK	12	0	Unmodified	_ALEHFTDLYDIK_					0	0	0	P49951;F1MPU0	3	HCD	FTMS	MULTI-MSMS	1	0	488.91716	1463.7296	-0.78479	-2.5788806	45.848	0.0033689	81.676	69.408	NaN	NaN	1	0	0	0	-1	0	0	0	0	y1;y2;y3;y4;y5;y6;y7;y8;y5-H2O;y7-H2O;y8-H2O;y9(2+);y11(2+);a2;b2;b4;b5;b6;b6-H2O;b7;b7-H2O	4943611;6800344;2101415;2653405;830114.6;665790.6;1394799;1854765;81457.8;104976.6;149017.3;732344;144869.2;6492256;928117.7;1179315;702102;311997.3;86123.2;2483521;237732.3	0.0007311284;0.001243646;0.002117601;0.002991717;0.002575905;0.003597423;0.003710883;0.01062945;0.002085984;0.003793008;-0.01126765;0.002963497;-0.003295239;0.0007743087;0.0008123441;0.001466329;0.003251787;-0.002577321;0.001814082;0.004125496;0.005230376	4.969873;4.779656;5.6436;5.557876;3.954604;4.693956;4.277961;10.47749;3.293527;4.465349;-11.30705;5.142395;-4.725327;4.927735;4.388022;3.249638;5.435089;-3.685317;2.662546;5.065881;6.567877	147.112073042229;260.195624505497;375.221693581858;538.284148004633;651.368627796459;766.394549310964;867.442114324381;1014.50360967671;633.358553031921;849.431467513721;996.514942083507;576.287250229826;697.356837504133;157.13276530401;185.127641890645;451.228492864285;598.295121322396;699.348628905146;681.333672815358;814.368869119843;796.357199552862	21	0.4616096	0.1693548
20140904-PurClathDigest-1ug-02	6098	3403	0	ALEHFTDLYDIK	12	0	Unmodified	_ALEHFTDLYDIK_					0	0	0	P49951;F1MPU0	3	HCD	FTMS	MULTI-MSMS	1	0	488.91716	1463.7296	-0.78479	-2.1689688	46.097	0.0022135	86.996	74.728	NaN	NaN	1	0	0	0	-1	0	0	0	0	y1;y2;y3;y4;y5;y6;y7;y8;y2-NH3;y3-NH3;y4-H2O;y8-H2O;y9(2+);y10(2+);a2;b2;b4;b5;b6;b6-H2O;b7;b7-H2O;b8	1852349;2475240;814859.8;947063.4;382837.6;214140.6;408244.8;753012.9;65391.1;39394.1;55254.3;36132.3;293711.3;43654.2;2681249;341241.6;360959.3;189926.6;81557.8;49775.3;717707.3;78667.8;58181.4	0.0008385346;0.001416628;0.002279019;0.002613228;0.005601123;0.001147902;0.006371952;0.008919374;-0.0007923738;0.004539066;-2.2602E-05;0.01083954;0.005272383;0.002268623;0.0008375352;0.0007280227;0.001930691;0.003201296;0.004522014;0.01322273;0.0009232005;-0.00156693;0.00962316	5.699975;5.444478;6.073797;4.854733;8.599046;1.49779;7.345703;8.791845;-3.258503;12.67213;-0.04344228;10.87769;9.148916;3.540246;5.330114;3.932543;4.278747;5.350697;6.466103;19.40746;1.133635;-1.967605;10.37596	147.111965636059;260.195451522595;375.221532163589;538.284526493576;651.365602579148;766.396998831672;867.439453255877;1014.50531975009;243.171111423323;358.192723015327;520.276597637003;996.492834898679;576.284941343595;640.809241652045;157.132702077425;185.127726212135;451.228028502747;598.295171813649;699.34152956938;681.322264165904;814.372071415222;796.363996859083;927.447435436271	23	0.4571726	0.2072072
20140904-PurClathDigest-1ug-03	5760	3211	0	ALEHFTDLYDIK	12	0	Unmodified	_ALEHFTDLYDIK_					0	0	0	P49951;F1MPU0	2	HCD	FTMS	MULTI-MSMS	1	0	732.8721	1463.7296	-1.1676	-3.0048701	45.775	1.9878E-06	155.61	131.93	NaN	NaN	1	0	0	0	-1	0	0	0	0	y1;y2;y3;y4;y5;y6;y7;y8;y9;y10;y2-NH3;y3-H2O;y6-NH3;y7-H2O;y8-H2O;y8-NH3;y9-H2O;y10-H2O;y10(2+);a2;b2;b3;b4;b4-H2O;b5;b6;b6-H2O;b7;b7-H2O;b8;b8-H2O;b9;b9-H2O;b10;b10-H2O;b11;b7(2+)	1996145;2034192;540253.8;335214.5;417144.2;198994.6;758284.6;970689.1;745524.2;120839.6;42911.2;42239.6;68451.9;40357.1;46328.9;27880.7;13970;104915.3;34492.7;1058495;583706.7;38738.1;1095710;50995.7;699337;265837.4;76026.3;1382701;211463;1071028;86586.6;228135.3;23919;1165166;200920.5;28032.1;51041	0.0007213078;0.001219364;0.001909774;0.001795453;0.002991687;0.003298645;0.004757436;0.003718629;0.006283195;0.01785639;0.001723511;0.000579053;0.01230024;0.002808015;-0.002350854;-0.007851484;0.004800904;0.0052795;0.0009939814;0.0007486096;0.0008876662;0.001446741;0.002344681;0.002313902;0.002816149;0.005649184;0.003773551;0.003372887;0.004771525;0.004534342;0.00325255;0.007504106;0.01724076;0.0…	4.903118;4.686337;5.089718;3.335504;4.592927;4.304107;5.484449;3.665442;5.456213;13.94379;7.087719;1.621032;16.41434;3.305755;-2.359097;-7.871197;4.235253;4.181451;1.551131;4.764184;4.794889;4.604969;5.196226;5.341207;4.706954;8.077875;5.538493;4.141715;5.991685;4.889029;3.576419;6.881264;16.07541;6.174101;14.03103;9.349133;2.792462	147.112082862762;260.195648786479;375.221901409237;538.28534426851;651.368212014871;766.394848088466;867.441067771415;1014.51052049502;1151.56686779163;1280.59788769413;243.168595538686;357.212667443705;749.359297393987;849.43245250611;996.506025291827;997.495541506963;1133.55778539643;1262.59989989622;640.810516293176;157.132791003129;185.127566568561;314.169600589889;451.227614512751;433.217080…	37	0.5559452	0.2402597
20140904-PurClathDigest-1ug-03	5824	3267	0	ALEHFTDLYDIK	12	0	Unmodified	_ALEHFTDLYDIK_					0	0	0	P49951;F1MPU0	2	HCD	FTMS	MULTI-MSMS	1	0	732.8721	1463.7296	-1.1676	-2.5949583	46.026	8.0999E-05	130.1	105.84	NaN	NaN	1	0	0	0	-1	0	0	0	0	y1;y2;y3;y4;y5;y6;y7;y8;y9;y10;y2-NH3;y10-H2O;y10(2+);a2;b2;b3;b4;b5;b6;b6-H2O;b7;b7-H2O;b8;b8-H2O;b9;b10;b10-H2O	3958904;3481807;963406.4;530219.2;686830.3;283693.6;1063997;1292666;1183728;89028.5;52042.3;102913.9;126980.2;2115480;1079027;81174.8;1783415;931918;334037.8;78134.6;2431998;307442.3;1736092;232317.4;330406.2;2358289;235033.7	0.001005872;0.001727569;0.002833551;0.002723105;0.004958776;0.001994652;0.007469654;0.009362676;0.008684316;0.01644548;0.0007937891;0.01154525;0.003777241;0.001018404;0.001082606;0.002024763;0.003080503;0.00390809;0.004297368;-0.002041073;0.005009381;-2.134817E-05;0.007594052;0.005406645;0.01331213;0.01019658;0.003645109	6.837466;6.639513;7.551687;5.058859;7.612884;2.602638;8.611164;9.228813;7.54132;12.84202;3.264344;9.144074;5.894499;6.481182;5.847898;6.444822;6.826949;6.532051;6.144876;-2.995686;6.151249;-0.02680711;8.188103;5.94502;12.20729;8.458125;3.06948	147.11179829873;260.1951405818;375.220977631644;538.284416616207;651.36624492567;766.396152081635;867.438355553787;1014.50487644792;1151.56446667041;1280.59929860555;243.169525260408;1262.59363414637;640.807733033955;157.132521208275;185.127371628814;314.169022567552;451.226878690613;598.294465019638;699.341754215628;681.337527970762;814.367985235075;796.362451277574;927.449464544416;909.44108726…	27	0.5574417	0.2268908
20140904-PurClathDigest-1ug-03	5763	3214	0	ALEHFTDLYDIK	12	0	Unmodified	_ALEHFTDLYDIK_					0	0	0	P49951;F1MPU0	3	HCD	FTMS	MULTI-MSMS	4	0	488.91716	1463.7296	-1.1609	-3.3987041	45.784	0.0008119	102.97	90.55	NaN	NaN	1	0	0	0	-1	0	0	0	0	y1;y2;y3;y4;y5;y6;y7;y8;y9;y10;y2-NH3;y3-H2O;y4-H2O;y7-H2O;y8-H2O;y9-H2O;a2;b2;b4;b5;b6;b6-H2O;b7;b7-H2O;b8;b8-H2O	3900340;5292763;1874123;2538932;1153355;854118.4;1425148;1992154;1068689;170063.4;105667.3;86192.6;117533.7;171324.8;264516.2;186036.7;4747534;766826.8;1115314;787065.4;271781.2;164611;2200737;443347.9;386463.6;85885.6	0.0007594755;0.001211878;0.001974924;0.002350926;0.002350585;0.003663944;0.003830671;0.005451497;0.007710955;0.00921052;-0.003743404;0.001300164;0.004043718;0.002923256;-0.0002989685;0.007396214;0.0007677158;0.001012006;0.002067202;0.001868196;0.001309836;0.0057904;0.003576953;0.004005409;0.005317305;0.01086104	5.162565;4.657564;5.263351;4.367439;3.608684;4.780755;4.416054;5.373533;6.696064;7.192311;-15.39393;3.639754;7.772308;3.441423;-0.3000174;6.524794;4.885778;5.466538;4.581282;3.122526;1.872947;8.498676;4.392298;5.029656;5.733242;11.94262	147.112044695114;260.195656273039;375.221836258493;538.284788795476;651.368853117155;766.394482789881;867.441994537241;1014.50878762742;1151.56544003122;1280.60653356256;243.17406245313;357.211946332995;520.272531316439;849.432337265557;996.503973406212;1133.55519008638;157.132771896897;185.127442228478;451.227891991185;598.296504913455;699.344741747841;681.329696496963;814.369417662348;796.35842…	26	0.4478242	0.1656051
20140904-PurClathDigest-1ug-03	5825	3268	0	ALEHFTDLYDIK	12	0	Unmodified	_ALEHFTDLYDIK_					0	0	0	P49951;F1MPU0	3	HCD	FTMS	MULTI-MSMS	2	0	488.91716	1463.7296	-1.1609	-3.1937483	46.029	0.0046123	78.964	66.544	NaN	NaN	1	0	0	0	-1	0	0	0	0	y1;y2;y3;y4;y5;y6;y7;y8;y9;y7-H2O;y8-H2O;a2;b2;b4;b5;b6;b7;b7-H2O;b8	3451039;4099889;1253112;1636675;633227.9;481397.1;829666.1;1271977;654623.5;70815.7;116770.2;4114259;593830.5;703307.6;497405.8;102483.4;1482536;205845.1;264955.4	0.001034819;0.001895856;0.00226441;0.004096558;0.004664131;0.008163359;0.003038047;0.007515028;0.004946046;0.005666248;0.01466925;0.00107258;0.001272591;0.00209009;-8.759332E-05;0.004788916;0.003508908;-0.002560414;-0.001918429	7.034235;7.28629;6.034863;7.610417;7.160532;10.6517;3.502302;7.407568;4.295052;6.67065;14.72094;6.825958;6.874144;4.632005;-0.1464041;6.847753;4.308743;-3.215127;-2.068478	147.11176935187;260.194972294918;375.221546772581;538.2830431628;651.366539570634;766.389983374379;867.442787160991;1014.5067240959;1151.56820494092;849.429594273869;996.48900518713;157.132467033055;185.127181644001;451.227869103777;598.29846070292;699.341262667768;814.369485707177;796.364990343672;927.458977024659	19	0.4603546	0.1637931
20140904-PurClathDigest-1ug-01	5792	3009	0	ALEHFTDLYDIKR	13	1	Unmodified	_ALEHFTDLYDIKR_					0	0	0	P49951;F1MPU0	3	HCD	FTMS	MULTI-MSMS	1	0	540.95086	1619.8308	-0.99421	-6.782074	42.831	2.1039E-07	182.23	152.88	NaN	NaN	1	0	0	0	-1	0	0	0	0	y1;y2;y3;y4;y5;y6;y7;y8;y9;y10;y1-NH3;y2-NH3;y3-NH3;y4-H2O;y4-NH3;y5-H2O;y5-NH3;y8-H2O;y8-NH3;y9-H2O;y9-NH3;y8(2+);y9(2+);y11(2+);a2;b2;b4;b5;b6;b7;b7-H2O;b8;b8-H2O;b10	4743506;2922471;8217965;1.18429E+07;1.011388E+07;2262915;1832100;3675418;3078559;1375201;78447.3;991602.1;446594.8;348122;794347.1;210066.5;247064.9;263595.5;240010.5;224877.4;89272.3;265454.9;293329.3;83565.4;4884536;1704116;1999162;1729162;509249.1;8171111;1127581;1541235;125815.7;104631.4	0.0009752465;0.001796058;0.002602985;0.003063622;0.004039152;0.004388728;0.007368458;0.008082748;0.003162004;0.007681452;0.002124254;0.001705545;0.002828341;0.004820185;0.001385275;0.006734049;0.002442268;-0.01939009;-0.01715829;-0.003273119;-0.005909539;0.007530269;0.001632344;-0.001713193;0.00085701;0.001140744;0.002608554;0.002298994;0.003945063;0.004246338;0.004068388;0.003804615;-0.00552003;…	5.569083;5.923436;6.252736;5.766037;5.816883;5.435174;7.987558;7.896865;2.701154;5.874167;13.43697;5.959577;7.083807;9.390407;2.693532;9.956147;3.605572;-19.28296;-17.04684;-2.83975;-5.122716;14.69982;2.786475;-2.383195;5.454053;6.161944;5.78102;3.842568;5.641107;5.214269;5.10874;4.102217;-6.069622;-8.592339	175.117976934531;303.212119141046;416.295376194115;531.321858589409;694.384211597603;807.4679260016;922.491889303902;1023.53885348753;1170.61218814792;1307.6665805628;158.090278825378;286.185660551725;399.268601736258;513.309537339455;514.296987834251;676.370952014156;677.359259380058;1005.55576163964;1006.53754542308;1152.60805858478;1153.59471058932;512.26957608226;585.809680965221;718.86377898…	34	0.7113029	0.2809917
20140904-PurClathDigest-1ug-01	5856	3065	0	ALEHFTDLYDIKR	13	1	Unmodified	_ALEHFTDLYDIKR_					0	0	0	P49951;F1MPU0	3	HCD	FTMS	MULTI-MSMS	1	0	540.95086	1619.8308	-0.99421	-4.5596196	43.069	5.7367E-08	162.93	144.96	NaN	NaN	1	0	0	0	-1	0	0	0	0	y1;y2;y3;y4;y5;y6;y7;y8;y9;y10;y1-NH3;y2-NH3;y3-NH3;y4-H2O;y4-NH3;y5-H2O;y5-NH3;y7-NH3;y9-H2O;y10-H2O;y6(2+);y8(2+);y9(2+);a2;b2;b4;b5;b6;b6-H2O;b7;b7-H2O;b8;b8-H2O;b7(2+)	3.291196E+07;2.528293E+07;6.174901E+07;9.029283E+07;7.314746E+07;1.711293E+07;1.336085E+07;2.427957E+07;2.398302E+07;1.595838E+07;772315.4;9341590;4157827;3266969;5905992;880232.9;1591435;653731.6;2695424;2202992;2961900;893620.7;1378127;3.586432E+07;1.326186E+07;1.571268E+07;1.420929E+07;4370841;910923.4;6.168508E+07;8289017;1.459412E+07;1860460;1643607	0.00101169;0.001782215;0.0024311;0.003418639;0.003579621;0.002405367;0.004169408;0.006121879;0.007100612;0.007363852;0.0005531695;0.001160359;-0.0003963117;0.002441788;0.002273231;0.005058131;0.001500915;0.007027995;-0.0001006891;0.0001952624;-0.0006017229;0.005348358;0.003270523;0.0008031167;0.0009231252;0.002192101;0.00236111;0.002625155;-0.0005949239;0.0039168;0.004714103;0.007270516;-0.002593…	5.777191;5.877782;5.839842;6.43422;5.155097;2.978893;4.519707;5.98108;6.065746;5.63129;3.499038;4.054561;-0.9925863;4.756929;4.420081;7.47832;2.21583;7.761746;-0.0873579;0.1514057;-1.488527;10.44047;5.582927;5.111072;4.986428;4.858081;3.946391;3.753742;-0.8731724;4.809614;5.91958;7.839255;-2.851395;9.926105	175.117940491222;303.212132984009;416.295548078939;531.321503571843;694.384671128955;807.469909363076;922.49508835416;1023.54081435673;1170.60824953993;1307.66689816227;158.091849910044;286.186205737861;399.271826389309;513.311915736384;514.29609987905;676.372627932278;677.360200732948;905.465680665597;1152.60488615494;1289.66350206579;404.240397321104;512.271757992751;585.808042785942;157.132736…	34	0.719759	0.3063063
20140904-PurClathDigest-1ug-01	5793	3010	0	ALEHFTDLYDIKR	13	1	Unmodified	_ALEHFTDLYDIKR_					0	0	0	P49951;F1MPU0	4	HCD	FTMS	MULTI-MSMS	2	0	405.96497	1619.8308	-0.54975	-5.3476443	42.834	0.00057054	112.02	99.707	NaN	NaN	1	0	0	0	-1	0	0	0	0	y1;y2;y3;y4;y5;y6;y7;y8;y9;y10;y1-NH3;y2-NH3;y3-NH3;y4-H2O;y4-NH3;y5-H2O;y5-NH3;y8-H2O;y7(2+);y9(2+);a2;b2;b4;b5;b7;b8	3649255;4699068;8824716;1.114282E+07;8893196;2431184;1768704;2368018;692522.9;1471104;142905.6;897616.4;469796.6;450147.6;533786.5;227315.2;282830.6;62847.5;284385.8;392968.4;5025718;597675.3;255367.7;94142.9;592722.1;188414.9	0.001083344;0.001998167;0.002378299;0.003111416;0.003946774;0.004426102;0.005005414;0.006417332;0.008162035;0.006400967;0.001207758;0.001304769;0.002704749;0.003780844;0.004904334;0.009556174;0.004343355;-0.01669277;0.002784137;0.003377172;0.000865247;0.0009791895;-0.0008270669;0.002857134;0.003865166;0.01373555	6.18637;6.590001;5.713005;5.855992;5.683847;5.481459;5.425957;6.269739;6.972479;4.894949;7.639628;4.559162;6.774257;7.365608;9.53606;14.12866;6.412206;-16.60058;6.029527;5.764981;5.506474;5.289272;-1.832913;4.775456;4.746209;14.81012	175.117868837121;303.211917031904;416.295600880127;531.321810794624;694.384303975407;807.467888628337;922.494252347459;1023.54051890347;1170.60718811753;1307.66786104696;158.091195321484;286.186061328613;399.268725328399;513.310576680435;514.293468776166;676.368129888649;677.357358292813;1005.55306431763;461.750482976969;585.807936137676;157.132674365744;185.127475045304;451.230786260287;598.2955…	26	0.5729892	0.208
20140904-PurClathDigest-1ug-01	5858	3067	0	ALEHFTDLYDIKR	13	1	Unmodified	_ALEHFTDLYDIKR_					0	0	0	P49951;F1MPU0	4	HCD	FTMS	MULTI-MSMS	3	0	405.96497	1619.8308	-0.54975	-4.6068262	43.075	3.8178E-05	110.98	101.41	NaN	NaN	1	0	0	0	-1	0	0	0	0	y1;y2;y3;y4;y5;y6;y7;y8;y9;y10;y1-NH3;y2-NH3;y3-NH3;y4-H2O;y4-NH3;y5-NH3;y6(2+);y8(2+);y9(2+);y10(2+);a2;b2;b7	1.232362E+07;1.269281E+07;2.483256E+07;2.929156E+07;2.549333E+07;3829822;4623381;4531890;2138607;2838559;428668.2;2282168;1310887;1060012;1454811;707029.6;1480927;1223062;1269176;632490;1.365308E+07;2056479;1509289	0.001241773;0.001949821;0.002493142;0.003569108;0.003552849;0.006613733;0.007108744;0.005262597;0.01435549;0.01058354;0.001256079;0.0008833086;0.001467457;0.003049778;0.002225248;0.007049043;0.00806535;0.006231626;0.005515236;0.005604825;0.001047603;0.001187681;-0.0001624957	7.091075;6.430553;5.988876;6.717418;5.116543;8.19073;7.706021;5.141557;12.26335;8.093474;7.945285;3.086479;3.67535;5.941381;4.326783;10.40672;19.95229;12.16471;9.414785;8.56568;6.667006;6.415486;-0.1995347	175.117710408097;303.21196537789;416.295486037089;531.321353103507;694.384697899997;807.465700996557;922.49214901804;1023.54167363834;1170.60099466282;1307.66367847265;158.091147000318;286.186482788585;399.269962620602;513.311307746506;514.296147861861;677.3546526049;404.23173024759;512.270874725689;585.805798073303;654.335164415042;157.132492009426;185.127266553387;814.373157111411	23	0.5731016	0.2277228
20140904-PurClathDigest-1ug-01	5949	3147	0	ALEHFTDLYDIKR	13	1	Unmodified	_ALEHFTDLYDIKR_					0	0	0	P49951;F1MPU0	4	HCD	FTMS	MULTI-MSMS	6	0	405.96497	1619.8308	-0.54975	-6.0884624	43.405	0.0052292	71.806	63.464	NaN	NaN	1	0	0	0	-1	0	0	0	0	y1;y2;y3;y4;y5;y6;y7;y8;y9;y2-NH3;y3-NH3;y4-H2O;y4-NH3;y6(2+);y7(2+);y8(2+);y9(2+);y10(2+);a2;b2;b7	118688.4;124580.7;158466.7;279772.3;187550.2;41615.5;45767.4;32519.3;15226.5;22259.3;6167.7;11897.2;17799.5;17660.6;9847;10010.3;13126.8;9260.3;137879.2;9063.7;20324.8	0.001194585;0.001651263;0.00350648;0.002911059;0.003994369;0.003793459;0.006541594;0.01182456;0.01394374;0.001263965;0.001284401;0.007893955;0.002552364;0.0003782298;0.006189295;0.00556499;0.01075903;-7.08974E-05;0.0009041688;0.001085523;0.001057352	6.821607;5.445899;8.423076;5.478898;5.75239;4.697965;7.091215;11.55267;11.9116;4.416584;3.216871;15.37864;4.962831;0.935658;13.40408;10.86336;18.36637;-0.1083493;5.754176;5.863657;1.298365	175.117757596487;303.212263935399;416.294472699078;531.322011152007;694.384256380209;807.468521270908;922.492716167756;1023.53511167417;1170.60140641295;286.186102132135;399.270145676878;513.306463569081;514.295820746159;404.239417368377;461.74707781921;512.271541361177;585.800554280796;654.34084013795;157.132635443863;185.127368711365;814.37193726346	21	0.5229465	0.2658228
20140904-PurClathDigest-1ug-01	5795	3012	0	ALEHFTDLYDIKR	13	1	Unmodified	_ALEHFTDLYDIKR_					0	0	0	P49951;F1MPU0	2	HCD	FTMS	MULTI-MSMS	4	0	810.92265	1619.8308	-0.52554	-5.74711	42.84	1.4651E-12	237.41	199.64	NaN	NaN	1	0	0	0	-1	0	0	0	0	y1;y2;y3;y4;y5;y6;y7;y8;y9;y10;y11;y12;y1-NH3;y2-NH3;y3-NH3;y4-NH3;y5-NH3;y6-NH3;y7-NH3;y8-H2O;y8-NH3;y9-H2O;y10-H2O;y10-NH3;y11-H2O;a2;b2;b3;b4;b4-H2O;b5;b6;b7;b7-H2O;b8;b9;b10;b10-H2O;b11;b12	1457632;247026.2;1730454;338542.4;588426;2083656;1145657;4539958;5342854;2587186;708518.5;109260.1;47332;172523.4;156314.5;109287.2;56276.9;71475.8;78694.9;128111.2;205502.9;590532.1;400533.1;66219.9;427932.3;1075887;772644.4;59435.8;1275080;38722.2;535970;59408.9;271334.6;71858.4;160906.6;83764.8;199075;18316.6;59522.3;96887.1	0.0011159;0.002018337;0.002636814;0.003147083;0.003399518;0.005629096;0.005615006;0.007051146;0.007572019;0.01019155;0.01113589;0.009995407;0.001322539;0.001102003;0.003803216;0.00422635;0.006799051;-0.00424504;-0.003582699;0.0009722195;-0.00325615;0.01273026;0.01035208;0.01141569;0.005158086;0.0009481405;0.001151413;0.001317613;0.002899862;0.002514022;0.003072323;0.009768045;0.005555611;-0.00403…	6.372281;6.656523;6.333998;5.923121;4.895726;6.971304;6.08677;6.88898;6.468451;7.793704;7.750988;6.44952;8.365679;3.850651;9.525479;8.217769;10.03765;-5.37041;-3.956701;0.9668675;-3.235046;11.04489;8.027022;8.845007;3.635781;6.034015;6.219572;4.193952;6.426614;5.803149;5.135128;13.96759;6.821995;-5.072624;3.101139;8.662222;10.24743;0.5100832;8.196086;9.702997	175.117836280997;303.211896861691;416.295342364988;531.321775127708;694.384851231256;807.466685633706;922.493642755402;1023.53988508987;1170.60777813312;1307.66407046829;1436.70571922266;1549.7909236837;158.091080540305;286.186264093806;399.267626861931;514.294146759498;677.35490259688;790.450010668925;905.476291358874;1005.53539933008;1006.52364328436;1152.59205520988;1289.65334525244;1290.63629…	40	0.6862514	0.2631579
20140904-PurClathDigest-1ug-01	5859	3068	0	ALEHFTDLYDIKR	13	1	Unmodified	_ALEHFTDLYDIKR_					0	0	0	P49951;F1MPU0	2	HCD	FTMS	MULTI-MSMS	4	0	810.92265	1619.8308	-0.52554	-4.142004	43.078	5.6517E-09	218.06	181.77	NaN	NaN	1	0	0	0	-1	0	0	0	0	y1;y2;y3;y4;y5;y6;y7;y8;y9;y10;y11;y1-NH3;y2-NH3;y3-NH3;y4-NH3;y6-NH3;y7-NH3;y8-H2O;y8-NH3;y9-H2O;y9-NH3;y10-NH3;y10(2+);y11(2+);y12(2+);a2;b2;b3;b4;b5;b6;b7;b10	3573996;557254.3;3948481;730515.2;1037773;4736423;2141399;1.048599E+07;1.237164E+07;2593912;889458.9;104737.5;443076.3;306100.7;380866.8;314045.8;282700.5;246215.7;315491.8;615498.2;865727;163059.4;2825717;430185.3;168230.3;2516275;1946215;185483.6;2907918;1169574;132113.9;664678.3;547267.2	0.001177164;0.002409066;0.002809527;0.002136729;0.0004961513;0.005731939;0.005979755;0.007823315;0.007733948;0.01168117;0.02278804;0.00115574;0.002085942;0.004850225;0.005472701;0.01263794;0.007882454;-0.00899538;-0.002572215;0.0007157017;-0.002563149;-0.01495663;0.003787371;0.001089836;0.01069077;0.001106053;0.001109406;0.0004507051;0.003224603;0.002883538;0.006006503;0.0106636;0.01568288	6.72213;7.945166;6.748882;4.021527;0.7145162;7.09867;6.482167;7.643396;6.606781;8.932862;15.86144;7.31059;7.28878;12.14784;10.64121;15.98863;8.705422;-8.945773;-2.555545;0.6209432;-2.221886;-11.58834;5.788105;1.516059;13.78754;7.038984;5.992667;1.434587;7.146304;4.819588;8.588816;13.09441;13.0091	175.11777501645;303.211506132933;416.295169652343;531.322785481934;694.387754598057;807.466582790727;922.493278006439;1023.53911292146;1170.60761620435;1307.66258084519;1436.69406706905;158.091247339319;286.185280155704;399.266579852742;514.292900408547;790.433127687016;905.464826206997;1005.54536692976;1006.52295934943;1152.60406976405;1153.59136419957;1290.66266954519;654.33698186919;718.860975…	33	0.6917022	0.3473684
20140904-PurClathDigest-1ug-02	5351	2750	0	ALEHFTDLYDIKR	13	1	Unmodified	_ALEHFTDLYDIKR_					0	0	0	P49951;F1MPU0	3	HCD	FTMS	MULTI-MSMS	6	0	540.95086	1619.8308	-0.79427	-6.9672786	43.143	2.0942E-05	132.86	115.72	NaN	NaN	1	0	0	0	-1	0	0	0	0	y1;y2;y3;y4;y5;y6;y7;y8;y9;y2-NH3;y3-NH3;y4-H2O;y4-NH3;y5-NH3;y6(2+);y7(2+);y10(2+);y11(2+);a2;b2;b4;b5;b6;b6-H2O;b7;b7-H2O;b8	121028;88173.5;176838.1;285063.5;215714.6;50029.2;33673.7;72960.1;67872;27260.2;12730.2;12402.1;24740.5;11763.8;16178.2;5797.8;23157.3;17049.8;131843.8;39794.1;52181.9;25161.6;8573.1;10791.7;180600.2;24067.1;30572.8	0.001143539;0.001883501;0.003151796;0.003510803;0.004203286;0.006041064;0.005124452;0.007326322;0.007427904;0.002628535;0.003470529;0.007981668;0.003352258;-0.003227922;0.001605127;-0.0002241171;0.004334738;0.01171295;0.001001324;0.000927255;0.002595884;0.007520637;0.0031556;0.002919687;0.004711477;0.001137389;0.001710369	6.530111;6.211827;7.571068;6.607683;6.053257;7.481506;5.554997;7.157829;6.345339;9.18475;8.692231;15.54952;6.518162;-4.765411;3.970744;-0.485361;6.624632;16.294;6.372478;5.008736;5.75294;12.5702;4.512236;4.28526;5.785437;1.428232;1.844153	175.117808642229;303.212031698016;416.294827382732;531.321411407754;694.384047463972;807.466273665922;922.494133309856;1023.53960991424;1170.60792224775;286.18473756186;399.267959548215;513.306375856552;514.29502085132;677.364929570184;404.238190471626;461.753491231352;654.336434502369;718.850352838214;157.132538288963;185.127526979806;451.227363309686;598.290852472551;699.342895983917;681.332567…	27	0.6653797	0.3552631
20140904-PurClathDigest-1ug-02	5410	2801	0	ALEHFTDLYDIKR	13	1	Unmodified	_ALEHFTDLYDIKR_					0	0	0	P49951;F1MPU0	3	HCD	FTMS	MULTI-MSMS	1	0	540.95086	1619.8308	-0.79427	-5.4856423	43.38	4.0767E-08	187.78	173.92	NaN	NaN	1	0	0	0	-1	0	0	0	0	y1;y2;y3;y4;y5;y6;y7;y8;y9;y10;y1-NH3;y2-NH3;y3-NH3;y4-H2O;y4-NH3;y5-H2O;y5-NH3;y7-NH3;y8-H2O;y9-H2O;y9-NH3;y7(2+);y8(2+);y9(2+);y11(2+);a2;b2;b4;b5;b6;b6-H2O;b7;b7-H2O;b8;b8-H2O;b10;b7(2+)	1.99244E+07;1.333294E+07;3.60114E+07;5.051323E+07;4.25082E+07;9795674;8823793;1.297198E+07;1.274151E+07;5720680;794740.9;3597138;2064472;1906474;4073795;543904.7;1225188;453294.6;1228809;585352.9;364611.8;645240.5;1123411;1201558;427632.4;2.23758E+07;7398798;9603553;7772817;2529532;956952.3;3.392292E+07;5246963;8047385;769369.6;749425.6;1286110	0.001044947;0.001939308;0.002208194;0.003257045;0.004277368;0.00372342;0.006933029;0.005899544;0.004510691;0.005243133;0.0001286551;0.001380133;0.003114571;0.004149973;0.003629565;0.002032101;-0.00113355;0.006344088;-0.002197101;-0.002128849;-0.00303911;0.005253867;0.001012112;0.005229584;0.0135039;0.0008484744;0.0009232616;0.002287611;0.003881416;-0.003124407;0.002368393;0.003614993;0.006401865;…	5.967104;6.395883;5.304387;6.130081;6.159946;4.611226;7.515542;5.763857;3.85328;4.009526;0.8137975;4.822504;7.800697;8.084727;7.057363;3.004397;-1.673475;7.006431;-2.185;-1.846986;-2.634476;11.37821;1.975715;8.927158;18.78545;5.399732;4.987165;5.06975;6.487467;-4.467593;3.476116;4.439009;8.038948;6.260334;15.21034;12.49626;8.00823	175.117907234169;303.211975890522;416.295770985214;531.321665166387;694.383973381651;807.468591310097;922.492324732562;1023.54103669186;1170.61083946108;1307.66901888175;158.092274424397;286.185985964185;399.268315506347;513.310207551659;514.294743545042;676.375653961935;677.362835197657;905.466364572408;1005.53856865109;1152.60691431467;1153.5918401609;461.748013247449;512.276094239454;585.80608…	37	0.7133464	0.3217391
20140904-PurClathDigest-1ug-02	5480	2863	0	ALEHFTDLYDIKR	13	1	Unmodified	_ALEHFTDLYDIKR_					0	0	0	P49951;F1MPU0	3	HCD	FTMS	MULTI-MSMS	7	1	540.95086	1619.8308	-0.79427	-3.0779834	43.647	0.0010192	91.62	78.449	NaN	NaN	1	0	0	0	-1	0	0	0	0	y1;y2;y3;y4;y5;y6;y7;y8;y9;y2-NH3;y3-NH3;y4-H2O;y4-NH3;y6(2+);y10(2+);a2;b2;b4;b5;b6;b6-H2O;b7;b7-H2O;b8	495006.7;305119.1;808731.4;1207079;1066133;167869.5;146146.2;261774.1;267064.8;82888.9;45179.2;31551.2;86779.6;37809.5;55091.5;529697.9;192248.7;210154.6;138750.2;49340.1;20284;815751.1;84203.3;210835.8	0.001017578;0.00219195;0.002322339;0.003179191;0.003568151;0.00497544;0.001498697;0.008789507;0.006675276;0.00104612;0.006157228;-0.004136211;0.004091947;0.003436625;0.0003034405;0.0008549679;0.0009896765;0.003599275;0.0009047355;0.008691492;0.009906918;0.004098264;0.002209507;0.007429548	5.810814;7.229106;5.57858;5.983552;5.138579;6.161785;1.624607;8.587376;5.702397;3.65538;15.4214;-8.057786;7.956431;8.501523;0.4637349;5.441057;5.345919;7.97665;1.512183;12.42818;14.54065;5.032442;2.774507;8.010729	175.117934603149;303.211723249153;416.295656840452;531.32174302028;694.384682598906;807.467339289673;922.497759065209;1023.53814672917;1170.60867487652;286.186319977565;399.265272849522;513.318493735508;514.294281162846;404.236358973406;654.340465800029;157.132684644756;185.127464558399;451.226359918711;598.297468374128;699.337360090842;681.325579979881;814.368896351705;796.360220422597;927.44962…	24	0.5224203	0.2330097
20140904-PurClathDigest-1ug-02	5354	2752	0	ALEHFTDLYDIKR	13	1	Unmodified	_ALEHFTDLYDIKR_					0	0	0	P49951;F1MPU0	4	HCD	FTMS	MULTI-MSMS	1	0	405.96497	1619.8308	-0.28859	-4.8537655	43.158	0.0052844	79.089	71.175	NaN	NaN	1	0	0	0	-1	0	0	0	0	y1;y2;y3;y4;y5;y6;y7;y8;y9;y10;y2-NH3;y3-NH3;y4-H2O;y4-NH3;y8(2+);a2;b2;b4;b7;b7-H2O	1285837;1440079;2892339;3435882;2750615;749716.6;550390.5;451459.1;459581.6;454598;265100.7;110877.7;82072.4;101451.9;159658.7;1698406;251051.2;58775.3;87483.6;48963.9	0.00101871;0.00174782;0.002444315;0.003025504;0.004857785;0.005280926;0.00709899;0.008178541;0.01695198;0.01109298;0.001868927;0.004343676;0.004265423;0.002693809;0.005482826;0.0009303142;0.001373448;-0.0005333152;-0.01262887;0.0009848687	5.817281;5.764347;5.871585;5.694295;6.995825;6.540113;7.695447;7.990456;14.48147;8.483059;6.530475;10.87912;8.309642;5.23786;10.70297;5.920568;7.418947;-1.181913;-15.50724;1.236711	175.117933470745;303.212167378514;416.295534864448;531.32189670745;694.383392964774;807.467033803815;922.492158772046;1023.53875769486;1170.5983981698;1307.66316903072;286.185497170074;399.267086401138;513.31009210179;514.295679301072;512.27162352542;157.132609298453;185.127080786911;451.230492508553;814.38562348871;796.361445060652	20	0.5731629	0.2150538
20140904-PurClathDigest-1ug-02	5418	2808	0	ALEHFTDLYDIKR	13	1	Unmodified	_ALEHFTDLYDIKR_					0	0	0	P49951;F1MPU0	4	HCD	FTMS	MULTI-MSMS	1	0	405.96497	1619.8308	-0.28859	-4.1129474	43.412	0.0040185	77.26	64.468	NaN	NaN	1	0	0	0	-1	0	0	0	0	y1;y2;y3;y4;y5;y6;y7;y8;y9;y1-NH3;y2-NH3;y3-NH3;y4-H2O;y4-NH3;y5-NH3;y6(2+);y7(2+);y9(2+);y10(2+);a2;b2;b7	3610666;4356590;8818849;9152767;8472102;1395999;1722633;1880319;444709.8;80055.6;774284.8;337835.8;345112;446840.4;337284.6;568064.9;132440.4;403355.4;186318;4334746;439347.1;411116.4	0.001000492;0.001884028;0.002431944;0.003069833;0.003927572;0.002654024;0.007983999;0.005958853;0.01622553;0.001958351;0.001538475;0.00273775;0.0017662;0.001082686;0.002346786;0.002262884;0.004728372;0.005568118;0.006348692;0.0009138668;0.0004207832;0.003627196	5.713245;6.213566;5.841869;5.777729;5.656193;3.286841;8.654823;5.821802;13.86088;12.38754;5.37579;6.856912;3.440788;2.105176;3.464611;5.597906;10.24014;9.505058;9.702518;5.815895;2.272931;4.453994	175.117951689186;303.212031170812;416.295547234947;531.321852377638;694.384323177566;807.469660705747;922.491273762472;1023.54097738296;1170.59912462092;158.09044472865;286.185827622381;399.26869232743;513.312591324938;514.297290423121;677.359354861347;404.237532714561;461.748538742279;585.805745191385;654.334420548718;157.132625745889;185.128033451604;814.369367419732	22	0.5605218	0.2018349
20140904-PurClathDigest-1ug-02	5501	2881	0	ALEHFTDLYDIKR	13	1	Unmodified	_ALEHFTDLYDIKR_					0	0	0	P49951;F1MPU0	4	HCD	FTMS	MULTI-MSMS	4	0	405.96497	1619.8308	-0.28859	-5.3476443	43.727	0.0065605	73.36	65.446	NaN	NaN	1	0	0	0	-1	0	0	0	0	y1;y2;y3;y4;y5;y6;y7;y8;y9;y10;y1-NH3;y2-NH3;y3-NH3;y4-H2O;y4-NH3;y6(2+);y8(2+);y9(2+);y10(2+);a2;b2;b4;b7	74529.2;98698;163587.9;199306.9;167717.1;26279.5;28437;24760;7972.8;14087;4076.4;16528.5;4317.2;6397.5;8328.1;7261.8;9818.7;8339.9;7559.5;100142.4;10618.5;3306.8;8093.6	0.00105275;0.001885275;0.002300296;0.002847362;0.004011916;0.004318211;0.007776463;0.009536505;0.01184309;0.01287998;0.0007751468;0.001202731;0.002036674;0.007011617;0.001348963;0.006160509;0.004477312;0.001590071;-0.01024601;0.0008535885;0.001804067;-0.002206189;0.004519412	6.011664;6.217679;5.525631;5.359013;5.77766;5.347841;8.429849;9.317202;10.11708;9.849626;4.903149;4.202617;5.101002;13.65969;2.622927;15.23997;8.740097;2.714314;-15.65828;5.432279;9.745042;-4.889256;5.549591	175.117899430992;303.212029923814;416.295678882985;531.322074849195;694.384238833565;807.467996519075;922.491481298394;1023.53739973116;1170.60350706584;1307.66138203963;158.091627932673;286.186163366386;399.269393403751;513.307345907815;514.297024146121;404.233635089116;512.272629038741;585.809723237894;654.35101525358;157.132686024206;185.126650167845;451.232165382694;814.368475203755	23	0.5140944	0.2323232
20140904-PurClathDigest-1ug-02	5355	2753	0	ALEHFTDLYDIKR	13	1	Unmodified	_ALEHFTDLYDIKR_					0	0	0	P49951;F1MPU0	2	HCD	FTMS	MULTI-MSMS	2	0	810.92265	1619.8308	-0.095855	-4.6358828	43.161	2.132E-12	241.51	192.99	NaN	NaN	1	0	0	0	-1	0	0	0	0	y1;y2;y3;y4;y5;y6;y7;y8;y9;y10;y11;y12;y1-NH3;y2-NH3;y3-NH3;y4-NH3;y5-NH3;y6-NH3;y7-NH3;y8-H2O;y8-NH3;y9-H2O;y10-H2O;y11-H2O;y11-NH3;a2;b2;b3;b4;b4-H2O;b5;b6;b6-H2O;b7;b7-H2O;b8;b9;b10;b10-H2O;b11;b12;b12(2+)	1073668;179375.1;1337026;266375;477074.2;1605625;909485.1;3442394;4222838;2232643;557547.9;71471.7;48621.7;130650.3;143008.1;75456.8;31942.4;51432.6;50872.6;65626.5;159980.4;397334.2;413965.1;227730.9;40314.2;831244.4;549116.6;74189.5;1000535;25232.2;384814.3;112727.4;21980.1;281703.3;49008;117397.7;41043.4;231952.9;25411.6;31110.1;37626;16582.5	0.0009403517;0.002067373;0.00249615;0.00310507;0.002850585;0.004282282;0.004751215;0.00580236;0.006487129;0.008242813;0.006065631;-0.0002637382;0.001061206;0.0005469141;0.002500575;0.001852977;0.00669062;-0.0005481307;0.0001211747;-0.004891758;-0.006585355;0.00877423;0.008585382;0.006832165;-0.02747803;0.0007458815;0.001009612;0.001752677;0.002564478;0.003329235;0.00362403;0.006040258;0.000955053…	5.369817;6.818246;5.996101;5.844047;4.105191;5.303346;5.150399;5.668908;5.541671;6.303454;4.221887;-0.1701755;6.712615;1.911039;6.262884;3.602935;9.877568;-0.6934446;0.1338248;-4.864801;-6.542652;7.612581;6.657115;4.815794;-19.35457;4.746822;5.453605;5.578765;5.683339;7.684929;6.057265;8.637083;1.401739;6.049351;8.154836;3.248835;4.552387;7.451468;3.428653;-1.454518;-7.603699;12.80139	175.118011829329;303.211847825629;416.295483029307;531.321817141702;694.385400164506;807.468032447479;922.49450654714;1023.54113387565;1170.60886302345;1307.66601920111;1436.71078948;1549.80118282927;158.091341873251;286.186819183069;399.268929502483;514.296520132653;677.355011027403;790.446313759005;905.472587485627;1005.54126330726;1006.52697248998;1152.59601123567;1289.65511194569;1418.6994582…	42	0.682434	0.2658228
20140904-PurClathDigest-1ug-02	5419	2809	0	ALEHFTDLYDIKR	13	1	Unmodified	_ALEHFTDLYDIKR_					0	0	0	P49951;F1MPU0	2	HCD	FTMS	MULTI-MSMS	2	0	810.92265	1619.8308	-0.095855	-3.5246556	43.415	4.0506E-09	214	177.71	NaN	NaN	1	0	0	0	-1	0	0	0	0	y1;y2;y3;y4;y5;y6;y7;y8;y9;y10;y11;y1-NH3;y2-NH3;y3-NH3;y4-NH3;y5-NH3;y6-NH3;y7-NH3;y8-H2O;y8-NH3;y9-H2O;y10-H2O;y10-NH3;y11-H2O;y11(2+);y12(2+);a2;b2;b3;b4;b4-H2O;b5;b6;b7;b7-H2O;b8;b9;b9-H2O;b10	1544264;299644.8;2083750;366831;432368.7;2077058;1014663;4551557;5674592;2823005;313866.9;39986.4;222187.1;252265;176177.6;45810.9;71948.1;111753;96417.3;182807;633340;297446.2;77025.3;114202.5;128586.6;55083.2;1229303;878143.3;99580.3;1159352;53877.3;387249.4;113809.6;222279.5;43913.1;87716.7;71915.6;31883.3;266186.2	0.001077655;0.002174665;0.002260353;0.003480724;0.005272557;0.005011102;0.003397554;0.006517704;0.00663994;0.009264436;0.008347369;0.0009123686;0.0004303239;0.002647151;0.005576309;0.007483155;0.002414114;0.01171304;-0.001611377;0.004581464;0.01267443;0.005239271;-0.0141168;0.01556617;0.006864951;-0.0007148638;0.0008190388;0.001136308;0.003478582;0.002379419;0.004728166;0.002542508;-0.000970195;-…	6.153885;7.172101;5.429682;6.551069;7.593153;6.20595;3.683002;6.367804;5.672212;7.084716;5.810064;5.771143;1.503646;6.629997;10.84267;11.04763;3.054126;12.93599;-1.602503;4.551805;10.99645;4.062526;-10.93765;10.97221;9.549839;-0.9219233;5.212401;6.13798;11.07238;5.273212;10.91414;4.249584;-1.387287;-0.9735679;6.894227;-3.250945;11.72317;3.607459;10.21113	175.117874525803;303.211740533419;416.295718825876;531.321441487608;694.38297819261;807.467303628022;922.495860207325;1023.54041853171;1170.60871021176;1307.66499757863;1436.70850774231;158.091490710921;286.186935773324;399.268782926834;514.29279680055;677.354218492261;790.443351514537;905.460995623211;1005.53798292697;1006.5158056709;1152.59211103985;1289.6584580571;1290.66182971689;1418.6907242…	39	0.6990814	0.3482143
[truncated: 4,803 more rows]
[truncated: 14 more columns]
