# Supplementary material for: The ∼16 kDa C-Terminal Sequence of Clathrin Assembly Protein AP180 Is Essential for Efficient Clathrin Binding
Source: PLoS One. 2014 Oct 20;9(10):e110557. doi: 10.1371/journal.pone.0110557 (PMC4203807; doi:10.1371/journal.pone.0110557)
Supplement: Data S2 — Contains the tabulated output of the MaxQuant software from processing the LC-MS/MS data of the tryptic digestion of purified clathrin. (ZIP) [file pone.0110557.s003.zip › txt/msmsScans.txt]

Raw file	Scan number	Retention time	Ion injection time	Total ion current	Collision energy	Summations	Base peak intensity	Elapsed time	Identified	MS/MS IDs	Sequence	Length	Filtered peaks	m/z	Mass	Charge	Type	Fragmentation	Mass analyzer	Parent intensity fraction	Fraction of total spectrum	Base peak fraction	Precursor full scan number	Precursor intensity	Precursor apex fraction	Precursor apex offset	Precursor apex offset time	Scan event number	Modifications	Modified sequence	Proteins	Score	Experiment	Intens Comp Factor	CTCD Comp	RawOvFtT	AGC Fill	Scan index	Precursor	Precursor count	MS scan index	MS scan number
20140904-PurClathDigest-1ug-01	620	7.4147	300	5848.5	0	NaN	774.54	0.72	-	-1		0	29	348.3	NaN	0	PEAK	HCD	FTMS	0	0	0	-1	0	0	0	0	1				NaN	1	NaN	NaN	NaN	NaN	0	0	1	618	619
20140904-PurClathDigest-1ug-01	621	7.4239	300	3352.7	0	NaN	180.01	0.64	-	-1		0	22	512.357319585775	NaN	0	PEAK	HCD	FTMS	0	0	0	-1	0	0	0	0	2				NaN	1	NaN	NaN	NaN	NaN	1	0	1	618	619
20140904-PurClathDigest-1ug-01	974	12.603	300	4599	0	NaN	376.04	0.73	-	-1		0	24	348.296610106582	694.578667279965	2	MULTI	HCD	FTMS	0	0	0	-1	0	0	0	0	1				NaN	1	NaN	NaN	NaN	NaN	2	0	1	970	973
20140904-PurClathDigest-1ug-01	976	12.627	300	3071.1	0	NaN	348.75	0.73	-	-1		0	17	512.119142320256	NaN	0	PEAK	HCD	FTMS	0	0	0	-1	0	0	0	0	1				NaN	1	NaN	NaN	NaN	NaN	3	0	1	971	975
20140904-PurClathDigest-1ug-01	1022	13.196	300	7045.7	0	NaN	1664.2	0.72	-	-1		0	20	348.3	NaN	0	PEAK	HCD	FTMS	0	0	0	-1	0	0	0	0	1				NaN	1	NaN	NaN	NaN	NaN	4	0	1	1016	1021
20140904-PurClathDigest-1ug-01	1023	13.205	300	4127.3	0	NaN	241.6	0.64	-	-1		0	27	512.11945397941	NaN	0	PEAK	HCD	FTMS	0	0	0	-1	0	0	0	0	2				NaN	1	NaN	NaN	NaN	NaN	5	0	1	1016	1021
20140904-PurClathDigest-1ug-01	1610	20.572	300	8413	0	NaN	1083.8	0.73	-	-1		0	27	321.172129456283	640.329705979367	2	MULTI	HCD	FTMS	0	0	0	-1	0	0	0	0	1				NaN	1	NaN	NaN	NaN	NaN	6	0	1	1602	1609
20140904-PurClathDigest-1ug-01	1615	20.625	300	14378	0	NaN	4908.2	0.72	+	4148	SVQNHNNK	8	41	470.73413605599	NaN	0	PEAK	HCD	FTMS	0	0	0	-1	0	0	0	0	1	Unmodified	_SVQNHNNK_	P49951;F1MPU0	49.7726707458496	1	NaN	NaN	NaN	NaN	7	0	1	1606	1614
20140904-PurClathDigest-1ug-01	1617	20.645	300	6604	0	NaN	1343	0.73	-	-1		0	27	314.158596837604	939.453961113014	3	MULTI	HCD	FTMS	0	0	0	-1	0	0	0	0	1				NaN	1	NaN	NaN	NaN	NaN	8	0	1	1607	1616
20140904-PurClathDigest-1ug-01	1619	20.665	300	13086	0	NaN	1024.8	0.73	-	-1		0	56	475.234608294096	1422.68199548249	3	MULTI	HCD	FTMS	0	0	0	-1	0	0	0	0	1				NaN	1	NaN	NaN	NaN	NaN	9	0	1	1608	1618
20140904-PurClathDigest-1ug-01	1620	20.674	300	5672.5	0	NaN	399.76	0.65	-	-1		0	32	459.220439000399	1374.6394876014	3	MULTI	HCD	FTMS	0	0	0	-1	0	0	0	0	2				NaN	1	NaN	NaN	NaN	NaN	10	0	1	1608	1618
20140904-PurClathDigest-1ug-01	1622	20.698	300	23882	0	NaN	2181.4	0.73	-	-1		0	55	536.822555588785	1071.63055824437	2	MULTI	HCD	FTMS	0	0	0	-1	0	0	0	0	1				NaN	1	NaN	NaN	NaN	NaN	11	0	1	1609	1621
20140904-PurClathDigest-1ug-01	1623	20.707	300	13965	0	NaN	5309.6	0.64	-	-1		0	36	471.225910572001	940.437268210803	2	MULTI	HCD	FTMS	0	0	0	-1	0	0	0	0	2				NaN	1	NaN	NaN	NaN	NaN	12	0	1	1609	1621
20140904-PurClathDigest-1ug-01	1625	20.727	199.94	195930	0	NaN	23933	0.62	+	1425	HGNSHQGEPR	10	96	373.507921986976	NaN	0	PEAK	HCD	FTMS	0	0	0	-1	0	0	0	0	1	Unmodified	_HGNSHQGEPR_	CON__P13645	118.001602172852	1	NaN	NaN	NaN	NaN	13	0	1	1610	1624
20140904-PurClathDigest-1ug-01	1626	20.734	235.82	72385	0	NaN	9538.8	0.58	-	-1		0	63	358.217392902001	1071.6303493062	3	MULTI	HCD	FTMS	0	0	0	-1	0	0	0	0	2				NaN	1	NaN	NaN	NaN	NaN	14	0	1	1610	1624
20140904-PurClathDigest-1ug-01	1627	20.741	300	33845	0	NaN	4548.2	0.64	+	1424	HGNSHQGEPR	10	66	559.758821062966	1117.50308919273	2	MULTI	HCD	FTMS	0	0	0	-1	0	0	0	0	3	Unmodified	_HGNSHQGEPR_	CON__P13645	169.999694824219	1	NaN	NaN	NaN	NaN	15	0	1	1610	1624
20140904-PurClathDigest-1ug-01	1628	20.748	300	15230	0	NaN	1896.4	0.65	-	-1		0	40	397.879998817173	1190.61816705172	3	MULTI	HCD	FTMS	0	0	0	-1	0	0	0	0	4				NaN	1	NaN	NaN	NaN	NaN	16	0	1	1610	1624
20140904-PurClathDigest-1ug-01	1629	20.756	300	21550	0	NaN	8446.6	0.64	-	-1		0	50	383.526876062757	1147.55879878847	3	MULTI	HCD	FTMS	0	0	0	-1	0	0	0	0	5				NaN	1	NaN	NaN	NaN	NaN	17	0	1	1610	1624
20140904-PurClathDigest-1ug-01	1630	20.764	300	3934.6	0	NaN	1004.4	0.65	-	-1		0	16	502.226224303934	1002.43789567467	2	MULTI	HCD	FTMS	0	0	0	-1	0	0	0	0	6				NaN	1	NaN	NaN	NaN	NaN	18	0	1	1610	1624
20140904-PurClathDigest-1ug-01	1631	20.772	300	7757.4	0	NaN	1192.3	0.65	-	-1		0	28	539.275603741831	1076.53665455046	2	MULTI	HCD	FTMS	0	0	0	-1	0	0	0	0	7				NaN	1	NaN	NaN	NaN	NaN	19	0	1	1610	1624
20140904-PurClathDigest-1ug-01	1633	20.79	122.24	468150	0	NaN	141480	0.54	-	-1		0	86	474.231004788678	946.447456644156	2	MULTI	HCD	FTMS	0	0	0	-1	0	0	0	0	1				NaN	1	NaN	NaN	NaN	NaN	20	0	1	1611	1632
20140904-PurClathDigest-1ug-01	1634	20.796	300	51224	0	NaN	3306.7	0.64	-	-1		0	83	483.730095779714	965.445638626229	2	MULTI	HCD	FTMS	0	0	0	-1	0	0	0	0	2				NaN	1	NaN	NaN	NaN	NaN	21	0	1	1611	1632
20140904-PurClathDigest-1ug-01	1635	20.803	300	51352	0	NaN	12898	0.64	-	-1		0	49	388.244947725635	774.475342518071	2	MULTI	HCD	FTMS	0	0	0	-1	0	0	0	0	3				NaN	1	NaN	NaN	NaN	NaN	22	0	1	1611	1632
20140904-PurClathDigest-1ug-01	1636	20.811	300	16194	0	NaN	1113	0.64	-	-1		0	61	346.692653556005	1382.74150835762	4	MULTI	HCD	FTMS	0	0	0	-1	0	0	0	0	4				NaN	1	NaN	NaN	NaN	NaN	23	0	1	1611	1632
20140904-PurClathDigest-1ug-01	1637	20.819	300	496510	0	NaN	27644	0.64	-	-1		0	174	495.275432513399	1482.8044681404	3	MULTI	HCD	FTMS	0	0	0	-1	0	0	0	0	5				NaN	1	NaN	NaN	NaN	NaN	24	0	1	1611	1632
20140904-PurClathDigest-1ug-01	1638	20.827	300	21505	0	NaN	3745.4	0.65	-	-1		0	45	416.20717050349	1245.59968211067	3	MULTI	HCD	FTMS	0	0	0	-1	0	0	0	0	6				NaN	1	NaN	NaN	NaN	NaN	25	0	1	1611	1632
20140904-PurClathDigest-1ug-01	1639	20.834	300	33412	0	NaN	4343.5	0.65	+	1428	HGNSHQGEPR	10	62	560.249007023131	1118.48346111306	2	MULTI	HCD	FTMS	0	0	0	-1	0	0	0	0	7	Deamidation (NQ)	_HGN(de)SHQGEPR_	CON__P13645	130.602096557617	1	NaN	NaN	NaN	NaN	26	0	1	1611	1632
20140904-PurClathDigest-1ug-01	1641	20.852	300	139950	0	NaN	23524	0.71	-	-1		0	57	338.206398433607	674.398243934015	2	MULTI	HCD	FTMS	0	0	0	-1	0	0	0	0	1				NaN	1	NaN	NaN	NaN	NaN	27	0	1	1612	1640
20140904-PurClathDigest-1ug-01	1642	20.861	300	91519	0	NaN	15367	0.64	+	1967	KEPDDAKPK	9	80	343.185640138905	1026.53509101692	3	MULTI	HCD	FTMS	0	0	0	-1	0	0	0	0	2	Unmodified	_KEPDDAKPK_	F1MSQ6	64.3270263671875	1	NaN	NaN	NaN	NaN	28	0	1	1612	1640
20140904-PurClathDigest-1ug-01	1643	20.869	300	33450	0	NaN	5302	0.65	-	-1		0	46	514.274685665678	1026.53481839816	2	MULTI	HCD	FTMS	0	0	0	-1	0	0	0	0	3				NaN	1	NaN	NaN	NaN	NaN	29	0	1	1612	1640
20140904-PurClathDigest-1ug-01	1644	20.876	300	18885	0	NaN	927.93	0.65	-	-1		0	54	620.318182342317	1857.93271762715	3	MULTI	HCD	FTMS	0	0	0	-1	0	0	0	0	4				NaN	1	NaN	NaN	NaN	NaN	30	0	1	1612	1640
20140904-PurClathDigest-1ug-01	1645	20.884	300	34005	0	NaN	2802.3	0.64	-	-1		0	61	349.17745742836	1044.51054288528	3	MULTI	HCD	FTMS	0	0	0	-1	0	0	0	0	5				NaN	1	NaN	NaN	NaN	NaN	31	0	1	1612	1640
20140904-PurClathDigest-1ug-01	1646	20.892	300	29641	0	NaN	7276.6	0.64	+	1942	KEAPKPEEK	9	43	352.529386438088	1054.56632991446	3	MULTI	HCD	FTMS	0	0	0	-1	0	0	0	0	6	Unmodified	_KEAPKPEEK_	F1MSQ6	30.6262702941895	1	NaN	NaN	NaN	NaN	32	0	1	1612	1640
20140904-PurClathDigest-1ug-01	1647	20.9	300	7988.9	0	NaN	951.2	0.64	-	-1		0	33	523.262577448658	1044.51060196412	2	MULTI	HCD	FTMS	0	0	0	-1	0	0	0	0	7				NaN	1	NaN	NaN	NaN	NaN	33	0	1	1612	1640
20140904-PurClathDigest-1ug-01	1649	20.917	300	44915	0	NaN	3419.9	0.72	-	-1		0	94	534.605812364779	1600.79560769454	3	MULTI	HCD	FTMS	0	0	0	-1	0	0	0	0	1				NaN	1	NaN	NaN	NaN	NaN	34	0	1	1613	1648
20140904-PurClathDigest-1ug-01	1650	20.926	300	85509	0	NaN	4340.2	0.64	-	-1		0	109	403.203266848257	1206.58797114497	3	MULTI	HCD	FTMS	0	0	0	-1	0	0	0	0	2				NaN	1	NaN	NaN	NaN	NaN	35	0	1	1613	1648
20140904-PurClathDigest-1ug-01	1651	20.934	300	25971	0	NaN	1251.6	0.65	-	-1		0	78	596.303127416605	1190.59170190001	2	MULTI	HCD	FTMS	0	0	0	-1	0	0	0	0	3				NaN	1	NaN	NaN	NaN	NaN	36	0	1	1613	1648
20140904-PurClathDigest-1ug-01	1652	20.942	300	40766	0	NaN	5039	0.64	+	1941	KDTKPEVK	8	55	315.519094859515	943.535455178745	3	MULTI	HCD	FTMS	0	0	0	-1	0	0	0	0	4	Unmodified	_KDTKPEVK_	F1N3M8;G3MYP5	44.5624313354492	1	NaN	NaN	NaN	NaN	37	0	1	1613	1648
20140904-PurClathDigest-1ug-01	1653	20.95	300	18296	0	NaN	3455	0.65	-	-1		0	40	475.733138876363	949.451724819526	2	MULTI	HCD	FTMS	0	0	0	-1	0	0	0	0	5				NaN	1	NaN	NaN	NaN	NaN	38	0	1	1613	1648
20140904-PurClathDigest-1ug-01	1654	20.957	300	90365	0	NaN	3540.6	0.65	+	2156	KNNHHEENISSK	12	125	479.567477860048	1435.68060418035	3	MULTI	HCD	FTMS	0	0	0	-1	0	0	0	0	6	Unmodified	_KNNHHEENISSK_	E1BFB0	143.632598876953	1	NaN	NaN	NaN	NaN	39	0	1	1613	1648
20140904-PurClathDigest-1ug-01	1655	20.965	300	59574	0	NaN	7003.7	0.64	-	-1		0	89	604.301746591282	1206.58894024936	2	MULTI	HCD	FTMS	0	0	0	-1	0	0	0	0	7				NaN	1	NaN	NaN	NaN	NaN	40	0	1	1613	1648
20140904-PurClathDigest-1ug-01	1657	20.983	194.19	110730	0	NaN	44530	0.6	-	-1		0	65	396.185960264557	NaN	0	PEAK	HCD	FTMS	0	0	0	-1	0	0	0	0	1				NaN	1	NaN	NaN	NaN	NaN	41	0	1	1614	1656
20140904-PurClathDigest-1ug-01	1658	20.99	300	121300	0	NaN	39868	0.65	-	-1		0	91	532.267938338479	1062.52132374376	2	MULTI	HCD	FTMS	0	0	0	-1	0	0	0	0	2				NaN	1	NaN	NaN	NaN	NaN	42	0	1	1614	1656
20140904-PurClathDigest-1ug-01	1659	20.998	300	91449	0	NaN	9586.7	0.64	-	-1		0	66	376.742283905822	751.470014878445	2	MULTI	HCD	FTMS	0	0	0	-1	0	0	0	0	3				NaN	1	NaN	NaN	NaN	NaN	43	0	1	1614	1656
20140904-PurClathDigest-1ug-01	1660	21.006	300	8908.7	0	NaN	1577.7	0.64	-	-1		0	27	586.291099288549	1170.5676456439	2	MULTI	HCD	FTMS	0	0	0	-1	0	0	0	0	4				NaN	1	NaN	NaN	NaN	NaN	44	0	1	1614	1656
20140904-PurClathDigest-1ug-01	1661	21.013	300	145240	0	NaN	29371	0.64	-	-1		0	82	387.180501312352	772.346449691504	2	MULTI	HCD	FTMS	0	0	0	-1	0	0	0	0	5				NaN	1	NaN	NaN	NaN	NaN	45	0	1	1614	1656
20140904-PurClathDigest-1ug-01	1662	21.021	300	52001	0	NaN	12121	0.64	-	-1		0	56	381.216602302896	760.418651672593	2	MULTI	HCD	FTMS	0	0	0	-1	0	0	0	0	6				NaN	1	NaN	NaN	NaN	NaN	46	0	1	1614	1656
20140904-PurClathDigest-1ug-01	1663	21.029	300	5159.8	0	NaN	751.75	0.64	-	-1		0	22	472.774427501514	943.534302069829	2	MULTI	HCD	FTMS	0	0	0	-1	0	0	0	0	7				NaN	1	NaN	NaN	NaN	NaN	47	0	1	1614	1656
20140904-PurClathDigest-1ug-01	1665	21.047	300	56267	0	NaN	13023	0.71	-	-1		0	65	524.270309794333	1046.52606665547	2	MULTI	HCD	FTMS	0	0	0	-1	0	0	0	0	1				NaN	1	NaN	NaN	NaN	NaN	48	0	1	1615	1664
20140904-PurClathDigest-1ug-01	1666	21.056	300	129590	0	NaN	26870	0.64	-	-1		0	90	349.8493395547	1046.5261892643	3	MULTI	HCD	FTMS	0	0	0	-1	0	0	0	0	2				NaN	1	NaN	NaN	NaN	NaN	49	0	1	1615	1664
20140904-PurClathDigest-1ug-01	1667	21.064	300	71689	0	NaN	11570	0.64	-	-1		0	58	376.200802270816	750.387051608432	2	MULTI	HCD	FTMS	0	0	0	-1	0	0	0	0	3				NaN	1	NaN	NaN	NaN	NaN	50	0	1	1615	1664
20140904-PurClathDigest-1ug-01	1668	21.071	300	5323.3	0	NaN	820.92	0.64	-	-1		0	24	468.220637140615	934.42672134803	2	MULTI	HCD	FTMS	0	0	0	-1	0	0	0	0	4				NaN	1	NaN	NaN	NaN	NaN	51	0	1	1615	1664
20140904-PurClathDigest-1ug-01	1669	21.079	300	18613	0	NaN	2122.9	0.64	-	-1		0	29	319.659414398205	637.304275863211	2	MULTI	HCD	FTMS	0	0	0	-1	0	0	0	0	5				NaN	1	NaN	NaN	NaN	NaN	52	0	1	1615	1664
20140904-PurClathDigest-1ug-01	1670	21.087	300	31001	0	NaN	8033.3	0.64	-	-1		0	36	365.210684244639	728.406815556077	2	MULTI	HCD	FTMS	0	0	0	-1	0	0	0	0	6				NaN	1	NaN	NaN	NaN	NaN	53	0	1	1615	1664
20140904-PurClathDigest-1ug-01	1671	21.095	300	6051.4	0	NaN	704.78	0.64	-	-1		0	33	718.8476073391	1435.680661745	2	MULTI	HCD	FTMS	0	0	0	-1	0	0	0	0	7				NaN	1	NaN	NaN	NaN	NaN	54	0	1	1615	1664
20140904-PurClathDigest-1ug-01	1673	21.112	300	10523	0	NaN	903.39	0.7	-	-1		0	57	528.251342665605	1581.73219859701	3	MULTI	HCD	FTMS	0	0	0	-1	0	0	0	0	1				NaN	1	NaN	NaN	NaN	NaN	55	0	1	1616	1672
20140904-PurClathDigest-1ug-01	1674	21.121	300	7358.4	0	NaN	1248.2	0.64	-	-1		0	33	672.83726582329	1343.65997871338	2	MULTI	HCD	FTMS	0	0	0	-1	0	0	0	0	2				NaN	1	NaN	NaN	NaN	NaN	56	0	1	1616	1672
20140904-PurClathDigest-1ug-01	1675	21.128	300	6556.6	0	NaN	664.59	0.65	-	-1		0	28	435.22772052776	868.44088812232	2	MULTI	HCD	FTMS	0	0	0	-1	0	0	0	0	3				NaN	1	NaN	NaN	NaN	NaN	57	0	1	1616	1672
20140904-PurClathDigest-1ug-01	1676	21.136	300	5311.1	0	NaN	1780.4	0.64	-	-1		0	25	465.490327091333	1857.93220249893	4	MULTI	HCD	FTMS	0	0	0	-1	0	0	0	0	4				NaN	1	NaN	NaN	NaN	NaN	58	0	1	1616	1672
20140904-PurClathDigest-1ug-01	1677	21.144	300	5270.5	0	NaN	1258.3	0.65	-	-1		0	17	561.265480000326	560.258203533726	1	MULTI	HCD	FTMS	0	0	0	-1	0	0	0	0	5				NaN	1	NaN	NaN	NaN	NaN	59	0	1	1616	1672
20140904-PurClathDigest-1ug-01	1679	21.162	300	23172	0	NaN	2366.9	0.71	-	-1		0	42	529.760344683066	1057.50613643293	2	MULTI	HCD	FTMS	0	0	0	-1	0	0	0	0	1				NaN	1	NaN	NaN	NaN	NaN	60	0	1	1617	1678
20140904-PurClathDigest-1ug-01	1681	21.181	300	12171	0	NaN	5672.4	0.71	-	-1		0	22	402.248360567799	NaN	0	PEAK	HCD	FTMS	0	0	0	-1	0	0	0	0	1				NaN	1	NaN	NaN	NaN	NaN	61	0	1	1618	1680
20140904-PurClathDigest-1ug-01	1684	21.211	300	5878.9	0	NaN	898.11	0.71	-	-1		0	26	459.214813917141	916.415074901082	2	MULTI	HCD	FTMS	0	0	0	-1	0	0	0	0	1				NaN	1	NaN	NaN	NaN	NaN	62	0	1	1620	1683
20140904-PurClathDigest-1ug-01	1685	21.22	300	14587	0	NaN	3081	0.64	-	-1		0	27	306.167299777261	610.320046621323	2	MULTI	HCD	FTMS	0	0	0	-1	0	0	0	0	2				NaN	1	NaN	NaN	NaN	NaN	63	0	1	1620	1683
20140904-PurClathDigest-1ug-01	1687	21.238	300	6503.1	0	NaN	2447.6	0.71	-	-1		0	17	399.235727260059	796.456901586918	2	MULTI	HCD	FTMS	0	0	0	-1	0	0	0	0	1				NaN	1	NaN	NaN	NaN	NaN	64	0	1	1621	1686
20140904-PurClathDigest-1ug-01	1690	21.268	300	6052.6	0	NaN	895.11	0.71	-	-1		0	28	467.735590553308	933.456628173416	2	MULTI	HCD	FTMS	0	0	0	-1	0	0	0	0	1				NaN	1	NaN	NaN	NaN	NaN	65	0	1	1623	1689
20140904-PurClathDigest-1ug-01	1691	21.277	300	10596	0	NaN	475.28	0.64	-	-1		0	57	436.550469886471	1306.62958025961	3	MULTI	HCD	FTMS	0	0	0	-1	0	0	0	0	2				NaN	1	NaN	NaN	NaN	NaN	66	0	1	1623	1689
20140904-PurClathDigest-1ug-01	1693	21.295	300	6487.5	0	NaN	300.91	0.72	-	-1		0	39	495.275432513399	1482.8044681404	3	MULTI	HCD	FTMS	0	0	0	-1	0	0	0	0	1				NaN	1	NaN	NaN	NaN	NaN	67	0	1	1624	1692
20140904-PurClathDigest-1ug-01	1696	21.326	300	9486.6	0	NaN	1006.2	0.72	-	-1		0	54	336.921967418874	1343.6587638091	4	MULTI	HCD	FTMS	0	0	0	-1	0	0	0	0	1				NaN	1	NaN	NaN	NaN	NaN	68	0	1	1626	1695
20140904-PurClathDigest-1ug-01	1698	21.345	300	11758	0	NaN	3150.7	0.72	-	-1		0	49	384.860756514624	1151.56044014407	3	MULTI	HCD	FTMS	0	0	0	-1	0	0	0	0	1				NaN	1	NaN	NaN	NaN	NaN	69	0	1	1627	1697
20140904-PurClathDigest-1ug-01	1706	21.427	300	8132.4	0	NaN	1642.5	0.73	-	-1		0	38	475.733138876363	949.451724819526	2	MULTI	HCD	FTMS	0	0	0	-1	0	0	0	0	1				NaN	1	NaN	NaN	NaN	NaN	70	0	1	1634	1705
20140904-PurClathDigest-1ug-01	1709	21.458	300	10235	0	NaN	404.98	0.73	-	-1		0	57	583.795740482021	1165.57692803084	2	MULTI	HCD	FTMS	0	0	0	-1	0	0	0	0	1				NaN	1	NaN	NaN	NaN	NaN	71	0	1	1636	1708
20140904-PurClathDigest-1ug-01	1712	21.488	300	8738.7	0	NaN	1122	0.73	-	-1		0	40	509.301855160745	1016.58915738829	2	MULTI	HCD	FTMS	0	0	0	-1	0	0	0	0	1				NaN	1	NaN	NaN	NaN	NaN	72	0	1	1638	1711
20140904-PurClathDigest-1ug-01	1715	21.519	300	10867	0	NaN	1986.3	0.72	-	-1		0	34	396.185960264557	NaN	0	PEAK	HCD	FTMS	0	0	0	-1	0	0	0	0	1				NaN	1	NaN	NaN	NaN	NaN	73	0	1	1640	1714
20140904-PurClathDigest-1ug-01	1719	21.559	300	13246	0	NaN	461.53	0.72	-	-1		0	68	577.124783623566	576.117507156966	1	MULTI	HCD	FTMS	0	0	0	-1	0	0	0	0	1				NaN	1	NaN	NaN	NaN	NaN	74	0	1	1643	1718
20140904-PurClathDigest-1ug-01	1725	21.621	300	13602	0	NaN	801.45	0.71	-	-1		0	66	672.83726582329	1343.65997871338	2	MULTI	HCD	FTMS	0	0	0	-1	0	0	0	0	1				NaN	1	NaN	NaN	NaN	NaN	75	0	1	1648	1724
20140904-PurClathDigest-1ug-01	1726	21.63	300	7485.6	0	NaN	351.7	0.65	-	-1		0	45	528.251342665605	1581.73219859701	3	MULTI	HCD	FTMS	0	0	0	-1	0	0	0	0	2				NaN	1	NaN	NaN	NaN	NaN	76	0	1	1648	1724
20140904-PurClathDigest-1ug-01	1735	21.721	300	15924	0	NaN	3525.9	0.7	-	-1		0	32	306.167299777261	610.320046621323	2	MULTI	HCD	FTMS	0	0	0	-1	0	0	0	0	1				NaN	1	NaN	NaN	NaN	NaN	77	0	1	1656	1734
20140904-PurClathDigest-1ug-01	1737	21.74	300	5822.1	0	NaN	631.82	0.73	-	-1		0	25	426.788065703431	851.561578473662	2	MULTI	HCD	FTMS	0	0	0	-1	0	0	0	0	1				NaN	1	NaN	NaN	NaN	NaN	78	0	1	1657	1736
20140904-PurClathDigest-1ug-01	1740	21.771	300	7536.2	0	NaN	2498.9	0.73	-	-1		0	22	399.235727260059	796.456901586918	2	MULTI	HCD	FTMS	0	0	0	-1	0	0	0	0	1				NaN	1	NaN	NaN	NaN	NaN	79	0	1	1659	1739
20140904-PurClathDigest-1ug-01	1742	21.79	300	8714.2	0	NaN	385.12	0.73	-	-1		0	47	436.550469886471	1306.62958025961	3	MULTI	HCD	FTMS	0	0	0	-1	0	0	0	0	1				NaN	1	NaN	NaN	NaN	NaN	80	0	1	1660	1741
20140904-PurClathDigest-1ug-01	1759	21.966	300	8894.6	0	NaN	376.59	0.73	-	-1		0	51	583.795740482021	1165.57692803084	2	MULTI	HCD	FTMS	0	0	0	-1	0	0	0	0	1				NaN	1	NaN	NaN	NaN	NaN	81	0	1	1676	1758
20140904-PurClathDigest-1ug-01	1760	21.975	300	5442	0	NaN	507.73	0.65	-	-1		0	30	475.733138876363	949.451724819526	2	MULTI	HCD	FTMS	0	0	0	-1	0	0	0	0	2				NaN	1	NaN	NaN	NaN	NaN	82	0	1	1676	1758
20140904-PurClathDigest-1ug-01	1763	22.004	300	1799.1	0	NaN	272.21	0.72	-	-1		0	12	362.740410865821	723.466268798442	2	MULTI	HCD	FTMS	0	0	0	-1	0	0	0	0	1				NaN	1	NaN	NaN	NaN	NaN	83	0	1	1678	1762
20140904-PurClathDigest-1ug-01	1770	22.075	300	10395	0	NaN	663.97	0.73	-	-1		0	56	403.204130006287	1206.59056061906	3	MULTI	HCD	FTMS	0	0	0	-1	0	0	0	0	1				NaN	1	NaN	NaN	NaN	NaN	84	0	1	1684	1769
20140904-PurClathDigest-1ug-01	1787	22.25	300	10355	0	NaN	1059.1	0.73	-	-1		0	32	426.788065703431	851.561578473662	2	MULTI	HCD	FTMS	0	0	0	-1	0	0	0	0	1				NaN	1	NaN	NaN	NaN	NaN	85	0	1	1700	1786
20140904-PurClathDigest-1ug-01	1836	22.756	300	7493.8	0	NaN	805.29	0.73	-	-1		0	27	426.788065703431	851.561578473662	2	MULTI	HCD	FTMS	0	0	0	-1	0	0	0	0	1				NaN	1	NaN	NaN	NaN	NaN	86	0	1	1748	1835
20140904-PurClathDigest-1ug-01	1842	22.818	300	9854.1	0	NaN	819.18	0.73	-	-1		0	46	321.4933370478	961.458181743599	3	MULTI	HCD	FTMS	0	0	0	-1	0	0	0	0	1				NaN	1	NaN	NaN	NaN	NaN	87	0	1	1753	1841
20140904-PurClathDigest-1ug-01	1885	23.272	300	6800.7	0	NaN	466.51	0.73	-	-1		0	38	426.788065703431	851.561578473662	2	MULTI	HCD	FTMS	0	0	0	-1	0	0	0	0	1				NaN	1	NaN	NaN	NaN	NaN	88	0	1	1795	1884
20140904-PurClathDigest-1ug-01	1890	23.324	300	13109	0	NaN	1133.6	0.73	-	-1		0	46	321.4933370478	961.458181743599	3	MULTI	HCD	FTMS	0	0	0	-1	0	0	0	0	1				NaN	1	NaN	NaN	NaN	NaN	89	0	1	1799	1889
20140904-PurClathDigest-1ug-01	1903	23.46	300	3459.5	0	NaN	269.08	0.72	-	-1		0	23	362.74044020503	723.466327476861	2	MULTI	HCD	FTMS	0	0	0	-1	0	0	0	0	1				NaN	1	NaN	NaN	NaN	NaN	90	0	1	1811	1902
20140904-PurClathDigest-1ug-01	1934	23.797	300	8432.2	0	NaN	483.15	0.73	-	-1		0	50	403.204041970636	NaN	0	PEAK	HCD	FTMS	0	0	0	-1	0	0	0	0	1				NaN	1	NaN	NaN	NaN	NaN	91	0	1	1841	1933
20140904-PurClathDigest-1ug-01	1936	23.818	300	7957.9	0	NaN	523.7	0.73	-	-1		0	32	426.788118372646	851.561683812092	2	MULTI	HCD	FTMS	0	0	0	-1	0	0	0	0	1				NaN	1	NaN	NaN	NaN	NaN	92	0	1	1842	1935
20140904-PurClathDigest-1ug-01	1938	23.838	300	15155	0	NaN	1381.4	0.73	-	-1		0	44	321.4933370478	961.458181743599	3	MULTI	HCD	FTMS	0	0	0	-1	0	0	0	0	1				NaN	1	NaN	NaN	NaN	NaN	93	0	1	1843	1937
20140904-PurClathDigest-1ug-01	1970	24.185	300	3828.7	0	NaN	408.93	0.73	-	-1		0	22	362.740277990885	723.466003048569	2	MULTI	HCD	FTMS	0	0	0	-1	0	0	0	0	1				NaN	1	NaN	NaN	NaN	NaN	94	0	1	1874	1969
20140904-PurClathDigest-1ug-01	1974	24.228	300	8143.9	0	NaN	2132.4	0.72	-	-1		0	34	383.888326481902	1148.64315004591	3	MULTI	HCD	FTMS	0	0	0	-1	0	0	0	0	1				NaN	1	NaN	NaN	NaN	NaN	95	0	1	1877	1973
20140904-PurClathDigest-1ug-01	1981	24.302	300	8093.8	0	NaN	523.26	0.73	-	-1		0	41	403.204041970636	NaN	0	PEAK	HCD	FTMS	0	0	0	-1	0	0	0	0	1				NaN	1	NaN	NaN	NaN	NaN	96	0	1	1883	1980
20140904-PurClathDigest-1ug-01	1985	24.345	300	18107	0	NaN	1846.6	0.73	-	-1		0	47	321.4933370478	961.458181743599	3	MULTI	HCD	FTMS	0	0	0	-1	0	0	0	0	1				NaN	1	NaN	NaN	NaN	NaN	97	0	1	1886	1984
20140904-PurClathDigest-1ug-01	1987	24.365	300	8393.5	0	NaN	886.05	0.73	-	-1		0	34	426.788118372646	851.561683812092	2	MULTI	HCD	FTMS	0	0	0	-1	0	0	0	0	1				NaN	1	NaN	NaN	NaN	NaN	98	0	1	1887	1986
20140904-PurClathDigest-1ug-01	2017	24.698	300	3418.8	0	NaN	343.84	0.73	-	-1		0	20	362.740277990885	723.466003048569	2	MULTI	HCD	FTMS	0	0	0	-1	0	0	0	0	1				NaN	1	NaN	NaN	NaN	NaN	99	0	1	1916	2016
20140904-PurClathDigest-1ug-01	2021	24.742	300	8671.7	0	NaN	1336.3	0.72	-	-1		0	39	383.888326481902	1148.64315004591	3	MULTI	HCD	FTMS	0	0	0	-1	0	0	0	0	1				NaN	1	NaN	NaN	NaN	NaN	100	0	1	1919	2020
20140904-PurClathDigest-1ug-01	2029	24.831	300	8204.8	0	NaN	374.61	0.73	-	-1		0	45	403.204041970636	NaN	0	PEAK	HCD	FTMS	0	0	0	-1	0	0	0	0	1				NaN	1	NaN	NaN	NaN	NaN	101	0	1	1926	2028
20140904-PurClathDigest-1ug-01	2031	24.851	300	18161	0	NaN	2000.8	0.73	-	-1		0	43	321.4933370478	961.458181743599	3	MULTI	HCD	FTMS	0	0	0	-1	0	0	0	0	1				NaN	1	NaN	NaN	NaN	NaN	102	0	1	1927	2030
20140904-PurClathDigest-1ug-01	2033	24.872	300	8859	0	NaN	754.38	0.73	-	-1		0	34	426.788118372646	851.561683812092	2	MULTI	HCD	FTMS	0	0	0	-1	0	0	0	0	1				NaN	1	NaN	NaN	NaN	NaN	103	0	1	1928	2032
20140904-PurClathDigest-1ug-01	2063	25.208	300	3780.9	0	NaN	526.54	0.73	-	-1		0	20	362.740277990885	723.466003048569	2	MULTI	HCD	FTMS	0	0	0	-1	0	0	0	0	1				NaN	1	NaN	NaN	NaN	NaN	104	0	1	1957	2062
20140904-PurClathDigest-1ug-01	2068	25.261	300	8909.7	0	NaN	1672.9	0.72	-	-1		0	40	383.888326481902	1148.64315004591	3	MULTI	HCD	FTMS	0	0	0	-1	0	0	0	0	1				NaN	1	NaN	NaN	NaN	NaN	105	0	1	1961	2067
20140904-PurClathDigest-1ug-01	2072	25.304	300	7223.3	0	NaN	589.9	0.73	-	-1		0	39	481.818655330026	NaN	0	PEAK	HCD	FTMS	0	0	0	-1	0	0	0	0	1				NaN	1	NaN	NaN	NaN	NaN	106	0	1	1964	2071
20140904-PurClathDigest-1ug-01	2077	25.359	300	20150	0	NaN	2145.4	0.73	-	-1		0	44	321.4933370478	961.458181743599	3	MULTI	HCD	FTMS	0	0	0	-1	0	0	0	0	1				NaN	1	NaN	NaN	NaN	NaN	107	0	1	1968	2076
20140904-PurClathDigest-1ug-01	2079	25.381	300	8270	0	NaN	892.46	0.73	-	-1		0	32	426.788118372646	851.561683812092	2	MULTI	HCD	FTMS	0	0	0	-1	0	0	0	0	1				NaN	1	NaN	NaN	NaN	NaN	108	0	1	1969	2078
20140904-PurClathDigest-1ug-01	2109	25.72	300	4995.6	0	NaN	667.89	0.73	-	-1		0	25	362.740447161031	723.466341388863	2	MULTI	HCD	FTMS	0	0	0	-1	0	0	0	0	1				NaN	1	NaN	NaN	NaN	NaN	109	0	1	1998	2108
20140904-PurClathDigest-1ug-01	2122	25.865	300	25914	0	NaN	2798.7	0.73	-	-1		0	47	321.4933370478	961.458181743599	3	MULTI	HCD	FTMS	0	0	0	-1	0	0	0	0	1				NaN	1	NaN	NaN	NaN	NaN	110	0	1	2010	2121
20140904-PurClathDigest-1ug-01	2124	25.887	300	8006.1	0	NaN	735.91	0.71	-	-1		0	30	426.788118372646	851.561683812092	2	MULTI	HCD	FTMS	0	0	0	-1	0	0	0	0	1				NaN	1	NaN	NaN	NaN	NaN	111	0	1	2011	2123
20140904-PurClathDigest-1ug-01	2125	25.896	300	8747.5	0	NaN	1698	0.64	-	-1		0	37	383.888326481902	1148.64315004591	3	MULTI	HCD	FTMS	0	0	0	-1	0	0	0	0	2				NaN	1	NaN	NaN	NaN	NaN	112	0	1	2011	2123
20140904-PurClathDigest-1ug-01	2134	25.993	300	11854	0	NaN	2851	0.72	-	-1		0	22	306.167253326223	NaN	0	PEAK	HCD	FTMS	0	0	0	-1	0	0	0	0	1				NaN	1	NaN	NaN	NaN	NaN	113	0	1	2019	2133
20140904-PurClathDigest-1ug-01	2155	26.224	300	5935.7	0	NaN	1029	0.73	-	-1		0	26	362.740447161031	723.466341388863	2	MULTI	HCD	FTMS	0	0	0	-1	0	0	0	0	1				NaN	1	NaN	NaN	NaN	NaN	114	0	1	2039	2154
20140904-PurClathDigest-1ug-01	2169	26.377	300	35386	0	NaN	3317.9	0.73	-	-1		0	61	321.4933370478	961.458181743599	3	MULTI	HCD	FTMS	0	0	0	-1	0	0	0	0	1				NaN	1	NaN	NaN	NaN	NaN	115	0	1	2052	2168
20140904-PurClathDigest-1ug-01	2171	26.397	300	9543.1	0	NaN	1058	0.73	-	-1		0	31	426.788118372646	851.561683812092	2	MULTI	HCD	FTMS	0	0	0	-1	0	0	0	0	1				NaN	1	NaN	NaN	NaN	NaN	116	0	1	2053	2170
20140904-PurClathDigest-1ug-01	2202	26.732	300	6560.5	0	NaN	1380.4	0.72	-	-1		0	25	362.740447161031	723.466341388863	2	MULTI	HCD	FTMS	0	0	0	-1	0	0	0	0	1				NaN	1	NaN	NaN	NaN	NaN	117	0	1	2083	2201
20140904-PurClathDigest-1ug-01	2203	26.741	300	7736.3	0	NaN	557.23	0.64	-	-1		0	44	397.200789573057	1188.58053931937	3	MULTI	HCD	FTMS	0	0	0	-1	0	0	0	0	2				NaN	1	NaN	NaN	NaN	NaN	118	0	1	2083	2201
20140904-PurClathDigest-1ug-01	2210	26.813	300	6348.2	0	NaN	1088.8	0.72	-	-1		0	30	349.850293061682	1046.52904978525	3	MULTI	HCD	FTMS	0	0	0	-1	0	0	0	0	1				NaN	1	NaN	NaN	NaN	NaN	119	0	1	2089	2209
20140904-PurClathDigest-1ug-01	2216	26.877	300	13806	0	NaN	1177.7	0.73	-	-1		0	45	301.475966840729	NaN	0	PEAK	HCD	FTMS	0	0	0	-1	0	0	0	0	1				NaN	1	NaN	NaN	NaN	NaN	120	0	1	2094	2215
20140904-PurClathDigest-1ug-01	2218	26.898	300	37888	0	NaN	4056.1	0.72	-	-1		0	53	321.4933370478	961.458181743599	3	MULTI	HCD	FTMS	0	0	0	-1	0	0	0	0	1				NaN	1	NaN	NaN	NaN	NaN	121	0	1	2095	2217
20140904-PurClathDigest-1ug-01	2220	26.918	300	9854.6	0	NaN	877.17	0.73	-	-1		0	33	426.788118372646	851.561683812092	2	MULTI	HCD	FTMS	0	0	0	-1	0	0	0	0	1				NaN	1	NaN	NaN	NaN	NaN	122	0	1	2096	2219
20140904-PurClathDigest-1ug-01	2227	26.994	300	5304.3	0	NaN	454.92	0.73	-	-1		0	32	464.808546927296	NaN	0	PEAK	HCD	FTMS	0	0	0	-1	0	0	0	0	1				NaN	1	NaN	NaN	NaN	NaN	123	0	1	2102	2226
20140904-PurClathDigest-1ug-01	2229	27.015	300	4824.3	0	NaN	950.99	0.73	-	-1		0	22	451.709865514815	901.405178096431	2	MULTI	HCD	FTMS	0	0	0	-1	0	0	0	0	1				NaN	1	NaN	NaN	NaN	NaN	124	0	1	2103	2228
20140904-PurClathDigest-1ug-01	2250	27.237	300	6809.3	0	NaN	560.92	0.73	-	-1		0	37	397.200789573057	1188.58053931937	3	MULTI	HCD	FTMS	0	0	0	-1	0	0	0	0	1				NaN	1	NaN	NaN	NaN	NaN	125	0	1	2123	2249
20140904-PurClathDigest-1ug-01	2251	27.246	300	7517.7	0	NaN	2220.2	0.64	-	-1		0	19	362.740447161031	723.466341388863	2	MULTI	HCD	FTMS	0	0	0	-1	0	0	0	0	2				NaN	1	NaN	NaN	NaN	NaN	126	0	1	2123	2249
20140904-PurClathDigest-1ug-01	2258	27.318	300	11452	0	NaN	2318.5	0.73	-	-1		0	38	349.850293061682	1046.52904978525	3	MULTI	HCD	FTMS	0	0	0	-1	0	0	0	0	1				NaN	1	NaN	NaN	NaN	NaN	127	0	1	2129	2257
20140904-PurClathDigest-1ug-01	2265	27.39	300	16981	0	NaN	1569.7	0.72	-	-1		0	49	301.475971097272	NaN	0	PEAK	HCD	FTMS	0	0	0	-1	0	0	0	0	1				NaN	1	NaN	NaN	NaN	NaN	128	0	1	2135	2264
20140904-PurClathDigest-1ug-01	2267	27.41	300	55598	0	NaN	5186.5	0.73	-	-1		0	70	321.4933370478	961.458181743599	3	MULTI	HCD	FTMS	0	0	0	-1	0	0	0	0	1				NaN	1	NaN	NaN	NaN	NaN	129	0	1	2136	2266
20140904-PurClathDigest-1ug-01	2269	27.43	300	7712.1	0	NaN	799.28	0.73	-	-1		0	23	426.788118372646	851.561683812092	2	MULTI	HCD	FTMS	0	0	0	-1	0	0	0	0	1				NaN	1	NaN	NaN	NaN	NaN	130	0	1	2137	2268
20140904-PurClathDigest-1ug-01	2276	27.504	300	7629.5	0	NaN	508.14	0.73	-	-1		0	45	464.808546927296	NaN	0	PEAK	HCD	FTMS	0	0	0	-1	0	0	0	0	1				NaN	1	NaN	NaN	NaN	NaN	131	0	1	2143	2275
20140904-PurClathDigest-1ug-01	2279	27.534	300	6799	0	NaN	1283.3	0.73	-	-1		0	28	451.709865514815	901.405178096431	2	MULTI	HCD	FTMS	0	0	0	-1	0	0	0	0	1				NaN	1	NaN	NaN	NaN	NaN	132	0	1	2145	2278
20140904-PurClathDigest-1ug-01	2299	27.743	300	10918	0	NaN	572.71	0.73	-	-1		0	58	397.200789573057	1188.58053931937	3	MULTI	HCD	FTMS	0	0	0	-1	0	0	0	0	1				NaN	1	NaN	NaN	NaN	NaN	133	0	1	2164	2298
20140904-PurClathDigest-1ug-01	2300	27.753	300	7002.1	0	NaN	2444.3	0.64	-	-1		0	18	362.740447161031	723.466341388863	2	MULTI	HCD	FTMS	0	0	0	-1	0	0	0	0	2				NaN	1	NaN	NaN	NaN	NaN	134	0	1	2164	2298
20140904-PurClathDigest-1ug-01	2307	27.824	300	15950	0	NaN	2347.3	0.73	-	-1		0	49	349.850293061682	1046.52904978525	3	MULTI	HCD	FTMS	0	0	0	-1	0	0	0	0	1				NaN	1	NaN	NaN	NaN	NaN	135	0	1	2170	2306
20140904-PurClathDigest-1ug-01	2314	27.897	300	17734	0	NaN	1780.3	0.73	-	-1		0	51	301.475971097272	NaN	0	PEAK	HCD	FTMS	0	0	0	-1	0	0	0	0	1				NaN	1	NaN	NaN	NaN	NaN	136	0	1	2176	2313
20140904-PurClathDigest-1ug-01	2316	27.917	300	50149	0	NaN	5119	0.73	-	-1		0	68	321.4933370478	961.458181743599	3	MULTI	HCD	FTMS	0	0	0	-1	0	0	0	0	1				NaN	1	NaN	NaN	NaN	NaN	137	0	1	2177	2315
20140904-PurClathDigest-1ug-01	2325	28.011	300	6291.4	0	NaN	1257.6	0.74	-	-1		0	33	464.808546927296	NaN	0	PEAK	HCD	FTMS	0	0	0	-1	0	0	0	0	1				NaN	1	NaN	NaN	NaN	NaN	138	0	1	2185	2324
20140904-PurClathDigest-1ug-01	2328	28.041	300	6097.1	0	NaN	1228.7	0.73	-	-1		0	24	451.709865514815	901.405178096431	2	MULTI	HCD	FTMS	0	0	0	-1	0	0	0	0	1				NaN	1	NaN	NaN	NaN	NaN	139	0	1	2187	2327
20140904-PurClathDigest-1ug-01	2348	28.249	300	7002.6	0	NaN	470.74	0.73	-	-1		0	37	397.200789573057	1188.58053931937	3	MULTI	HCD	FTMS	0	0	0	-1	0	0	0	0	1				NaN	1	NaN	NaN	NaN	NaN	140	0	1	2206	2347
20140904-PurClathDigest-1ug-01	2356	28.332	300	24542	0	NaN	4830.6	0.73	-	-1		0	57	349.850293061682	1046.52904978525	3	MULTI	HCD	FTMS	0	0	0	-1	0	0	0	0	1				NaN	1	NaN	NaN	NaN	NaN	141	0	1	2213	2355
20140904-PurClathDigest-1ug-01	2360	28.374	300	7186.9	0	NaN	1110.6	0.73	-	-1		0	39	436.228060366167	1305.6623516987	3	MULTI	HCD	FTMS	0	0	0	-1	0	0	0	0	1				NaN	1	NaN	NaN	NaN	NaN	142	0	1	2216	2359
20140904-PurClathDigest-1ug-01	2363	28.404	300	16417	0	NaN	1648.5	0.73	-	-1		0	47	301.475971097272	NaN	0	PEAK	HCD	FTMS	0	0	0	-1	0	0	0	0	1				NaN	1	NaN	NaN	NaN	NaN	143	0	1	2218	2362
20140904-PurClathDigest-1ug-01	2365	28.424	300	34602	0	NaN	3204.5	0.72	-	-1		0	54	321.4933370478	961.458181743599	3	MULTI	HCD	FTMS	0	0	0	-1	0	0	0	0	1				NaN	1	NaN	NaN	NaN	NaN	144	0	1	2219	2364
20140904-PurClathDigest-1ug-01	2374	28.517	300	4933.3	0	NaN	223.34	0.73	-	-1		0	31	464.808546927296	NaN	0	PEAK	HCD	FTMS	0	0	0	-1	0	0	0	0	1				NaN	1	NaN	NaN	NaN	NaN	145	0	1	2227	2373
20140904-PurClathDigest-1ug-01	2388	28.661	300	4797.5	0	NaN	406.85	0.73	-	-1		0	28	451.218729698537	900.422906463873	2	MULTI	HCD	FTMS	0	0	0	-1	0	0	0	0	1				NaN	1	NaN	NaN	NaN	NaN	146	0	1	2240	2387
20140904-PurClathDigest-1ug-01	2405	28.837	300	30827	0	NaN	7343.8	0.72	-	-1		0	55	349.850293061682	1046.52904978525	3	MULTI	HCD	FTMS	0	0	0	-1	0	0	0	0	1				NaN	1	NaN	NaN	NaN	NaN	147	0	1	2256	2404
20140904-PurClathDigest-1ug-01	2409	28.878	300	7932.1	0	NaN	379.03	0.72	-	-1		0	44	436.228060366167	1305.6623516987	3	MULTI	HCD	FTMS	0	0	0	-1	0	0	0	0	1				NaN	1	NaN	NaN	NaN	NaN	148	0	1	2259	2408
20140904-PurClathDigest-1ug-01	2414	28.93	300	18480	0	NaN	1772.3	0.73	-	-1		0	53	321.4933370478	961.458181743599	3	MULTI	HCD	FTMS	0	0	0	-1	0	0	0	0	1				NaN	1	NaN	NaN	NaN	NaN	149	0	1	2263	2413
20140904-PurClathDigest-1ug-01	2423	29.025	300	3497.3	0	NaN	388.08	0.73	-	-1		0	21	464.808546927296	NaN	0	PEAK	HCD	FTMS	0	0	0	-1	0	0	0	0	1				NaN	1	NaN	NaN	NaN	NaN	150	0	1	2271	2422
20140904-PurClathDigest-1ug-01	2449	29.302	300	4260.2	0	NaN	341.37	0.73	-	-1		0	29	451.218729698537	900.422906463873	2	MULTI	HCD	FTMS	0	0	0	-1	0	0	0	0	1				NaN	1	NaN	NaN	NaN	NaN	151	0	1	2296	2448
20140904-PurClathDigest-1ug-01	2453	29.345	300	19269	0	NaN	5506.4	0.73	-	-1		0	35	349.850293061682	1046.52904978525	3	MULTI	HCD	FTMS	0	0	0	-1	0	0	0	0	1				NaN	1	NaN	NaN	NaN	NaN	152	0	1	2299	2452
20140904-PurClathDigest-1ug-01	2457	29.386	300	8330.4	0	NaN	500.28	0.72	-	-1		0	46	436.228060366167	1305.6623516987	3	MULTI	HCD	FTMS	0	0	0	-1	0	0	0	0	1				NaN	1	NaN	NaN	NaN	NaN	153	0	1	2302	2456
20140904-PurClathDigest-1ug-01	2471	29.538	300	6633	0	NaN	448.59	0.73	-	-1		0	40	464.808546927296	NaN	0	PEAK	HCD	FTMS	0	0	0	-1	0	0	0	0	1				NaN	1	NaN	NaN	NaN	NaN	154	0	1	2315	2470
20140904-PurClathDigest-1ug-01	2486	29.699	300	11281	0	NaN	4071.8	0.73	-	-1		0	26	410.70938381688	819.40421470056	2	MULTI	HCD	FTMS	0	0	0	-1	0	0	0	0	1				NaN	1	NaN	NaN	NaN	NaN	155	0	1	2329	2485
20140904-PurClathDigest-1ug-01	2500	29.849	300	15589	0	NaN	3684.6	0.73	-	-1		0	50	349.850293061682	1046.52904978525	3	MULTI	HCD	FTMS	0	0	0	-1	0	0	0	0	1				NaN	1	NaN	NaN	NaN	NaN	156	0	1	2342	2499
20140904-PurClathDigest-1ug-01	2504	29.891	300	8317.5	0	NaN	706.96	0.73	-	-1		0	46	436.228060366167	1305.6623516987	3	MULTI	HCD	FTMS	0	0	0	-1	0	0	0	0	1				NaN	1	NaN	NaN	NaN	NaN	157	0	1	2345	2503
20140904-PurClathDigest-1ug-01	2519	30.052	300	3618.7	0	NaN	291.68	0.73	-	-1		0	21	464.808546927296	NaN	0	PEAK	HCD	FTMS	0	0	0	-1	0	0	0	0	1				NaN	1	NaN	NaN	NaN	NaN	158	0	1	2359	2518
20140904-PurClathDigest-1ug-01	2534	30.21	300	17899	0	NaN	6126.4	0.73	-	-1		0	37	410.70938381688	819.40421470056	2	MULTI	HCD	FTMS	0	0	0	-1	0	0	0	0	1				NaN	1	NaN	NaN	NaN	NaN	159	0	1	2373	2533
20140904-PurClathDigest-1ug-01	2536	30.228	36.481	12270000	0	NaN	939090	0.45	-	-1		0	210	362.845847711105	1085.51571373352	3	MULTI	HCD	FTMS	0	0	0	-1	0	0	0	0	1				NaN	1	NaN	NaN	NaN	NaN	160	0	1	2374	2535
20140904-PurClathDigest-1ug-01	2537	30.233	46.782	5790500	0	NaN	254630	0.39	-	-1		0	187	483.241934751677	NaN	0	PEAK	HCD	FTMS	0	0	0	-1	0	0	0	0	2				NaN	1	NaN	NaN	NaN	NaN	161	0	1	2374	2535
20140904-PurClathDigest-1ug-01	2538	30.236	66.245	4949000	0	NaN	236220	0.41	-	-1		0	201	456.585943071266	NaN	0	PEAK	HCD	FTMS	0	0	0	-1	0	0	0	0	3				NaN	1	NaN	NaN	NaN	NaN	162	0	1	2374	2535
20140904-PurClathDigest-1ug-01	2539	30.24	81.011	6597700	0	NaN	523900	0.42	-	-1		0	218	355.1814161205	1062.5224189617	3	MULTI	HCD	FTMS	0	0	0	-1	0	0	0	0	4				NaN	1	NaN	NaN	NaN	NaN	163	0	1	2374	2535
20140904-PurClathDigest-1ug-01	2540	30.244	127.85	612480	0	NaN	18199	0.48	-	-1		0	170	527.264217719924	1578.77082375997	3	MULTI	HCD	FTMS	0	0	0	-1	0	0	0	0	5				NaN	1	NaN	NaN	NaN	NaN	164	0	1	2374	2535
20140904-PurClathDigest-1ug-01	2541	30.249	137.22	769580	0	NaN	28991	0.48	-	-1		0	175	342.691241856533	1366.73586155973	4	MULTI	HCD	FTMS	0	0	0	-1	0	0	0	0	6				NaN	1	NaN	NaN	NaN	NaN	165	0	1	2374	2535
20140904-PurClathDigest-1ug-01	2542	30.254	167.78	1472500	0	NaN	196480	0.51	-	-1		0	188	425.874394994995	NaN	0	PEAK	HCD	FTMS	0	0	0	-1	0	0	0	0	7				NaN	1	NaN	NaN	NaN	NaN	166	0	1	2374	2535
20140904-PurClathDigest-1ug-01	2544	30.268	1.91	144020000	0	NaN	33475000	0.41	-	-1		0	96	324.197730901238	NaN	0	PEAK	HCD	FTMS	0	0	0	-1	0	0	0	0	1				NaN	1	NaN	NaN	NaN	NaN	167	0	1	2375	2543
20140904-PurClathDigest-1ug-01	2545	30.272	11.898	3443700	0	NaN	228150	0.35	-	-1		0	127	367.94683910834	1467.75825056696	4	MULTI	HCD	FTMS	0	0	0	-1	0	0	0	0	2				NaN	1	NaN	NaN	NaN	NaN	168	0	1	2375	2543
20140904-PurClathDigest-1ug-01	2546	30.275	16.759	2402500	0	NaN	140990	0.36	-	-1		0	152	629.639894425093	1885.89785387548	3	MULTI	HCD	FTMS	0	0	0	-1	0	0	0	0	3				NaN	1	NaN	NaN	NaN	NaN	169	0	1	2375	2543
20140904-PurClathDigest-1ug-01	2547	30.278	16.705	2218900	0	NaN	201160	0.36	-	-1		0	113	490.259940154699	1467.7579910643	3	MULTI	HCD	FTMS	0	0	0	-1	0	0	0	0	4				NaN	1	NaN	NaN	NaN	NaN	170	0	1	2375	2543
20140904-PurClathDigest-1ug-01	2548	30.281	28.301	799770	0	NaN	58514	0.38	-	-1		0	115	675.837340652889	1349.66012837258	2	MULTI	HCD	FTMS	0	0	0	-1	0	0	0	0	5				NaN	1	NaN	NaN	NaN	NaN	171	0	1	2375	2543
20140904-PurClathDigest-1ug-01	2549	30.284	18.804	2066700	0	NaN	106680	0.37	-	-1		0	131	450.894044791806	1349.66030497562	3	MULTI	HCD	FTMS	0	0	0	-1	0	0	0	0	6				NaN	1	NaN	NaN	NaN	NaN	172	0	1	2375	2543
20140904-PurClathDigest-1ug-01	2550	30.287	20.306	6840600	0	NaN	710540	0.37	-	-1		0	177	431.877865869821	1292.61176820966	3	MULTI	HCD	FTMS	0	0	0	-1	0	0	0	0	7				NaN	1	NaN	NaN	NaN	NaN	173	0	1	2375	2543
20140904-PurClathDigest-1ug-01	2552	30.298	4.301	18400000	0	NaN	1582100	0.42	+	1963	KEETPAAPEKK	11	113	409.891212365069	1226.65180769541	3	MULTI	HCD	FTMS	0	0	0	-1	0	0	0	0	1	Unmodified	_KEETPAAPEKK_	F1MSQ6	89.4588470458984	1	NaN	NaN	NaN	NaN	174	0	1	2376	2551
20140904-PurClathDigest-1ug-01	2553	30.302	5.422	4061300	0	NaN	194740	0.35	-	-1		0	101	536.606693382214	1606.79825074684	3	MULTI	HCD	FTMS	0	0	0	-1	0	0	0	0	2				NaN	1	NaN	NaN	NaN	NaN	175	0	1	2376	2551
20140904-PurClathDigest-1ug-01	2554	30.305	5.629	12158000	0	NaN	942580	0.35	-	-1		0	137	413.886450995398	1238.6375235864	3	MULTI	HCD	FTMS	0	0	0	-1	0	0	0	0	3				NaN	1	NaN	NaN	NaN	NaN	176	0	1	2376	2551
20140904-PurClathDigest-1ug-01	2555	30.308	6.74	4711400	0	NaN	266620	0.35	+	2723	LKDRPPEQK	9	98	370.880552439035	1109.61982791731	3	MULTI	HCD	FTMS	0	0	0	-1	0	0	0	0	4	Unmodified	_LKDRPPEQK_	G3MYP5	48.2793998718262	1	NaN	NaN	NaN	NaN	177	0	1	2376	2551
20140904-PurClathDigest-1ug-01	2556	30.31	7.486	10482000	0	NaN	1612900	0.35	+	19	AAKDEVSESRR	11	114	416.549602000532	1246.6269766018	3	MULTI	HCD	FTMS	0	0	0	-1	0	0	0	0	5	Unmodified	_AAKDEVSESRR_	P02548	120.433700561523	1	NaN	NaN	NaN	NaN	178	0	1	2376	2551
20140904-PurClathDigest-1ug-01	2557	30.313	10.062	2537400	0	NaN	296620	0.35	-	-1		0	79	349.153140794625	1044.43759298407	3	MULTI	HCD	FTMS	0	0	0	-1	0	0	0	0	6				NaN	1	NaN	NaN	NaN	NaN	179	0	1	2376	2551
20140904-PurClathDigest-1ug-01	2558	30.316	10.17	3783300	0	NaN	140480	0.36	-	-1		0	118	545.278372766484	1632.81328889965	3	MULTI	HCD	FTMS	0	0	0	-1	0	0	0	0	7				NaN	1	NaN	NaN	NaN	NaN	180	0	1	2376	2551
20140904-PurClathDigest-1ug-01	2560	30.327	3.514	45954000	0	NaN	8718800	0.41	+	4410	VAANAPK	7	79	335.697989393225	669.381425853249	2	MULTI	HCD	FTMS	0	0	0	-1	0	0	0	0	1	Unmodified	_VAANAPK_	P49951;F1MPU0	86.5385665893555	1	NaN	NaN	NaN	NaN	181	0	1	2377	2559
20140904-PurClathDigest-1ug-01	2561	30.331	6.074	7379700	0	NaN	1730800	0.35	+	3444	QREEAEAATR	10	104	580.786397202403	1159.55824147161	2	MULTI	HCD	FTMS	0	0	0	-1	0	0	0	0	2	Unmodified	_QREEAEAATR_	F1MSQ6	190.530502319336	1	NaN	NaN	NaN	NaN	182	0	1	2377	2559
20140904-PurClathDigest-1ug-01	2562	30.334	3.829	28844000	0	NaN	2133300	0.35	-	-1		0	146	427.977101621677	1707.87930062031	4	MULTI	HCD	FTMS	0	0	0	-1	0	0	0	0	3				NaN	1	NaN	NaN	NaN	NaN	183	0	1	2377	2559
20140904-PurClathDigest-1ug-01	2563	30.337	9.079	2004000	0	NaN	358800	0.35	-	-1		0	84	586.282960927007	1170.55136892081	2	MULTI	HCD	FTMS	0	0	0	-1	0	0	0	0	4				NaN	1	NaN	NaN	NaN	NaN	184	0	1	2377	2559
20140904-PurClathDigest-1ug-01	2564	30.34	9.416	1894400	0	NaN	134080	0.35	+	3445	QREEAEAATR	10	83	387.526896525565	1159.55886017689	3	MULTI	HCD	FTMS	0	0	0	-1	0	0	0	0	5	Unmodified	_QREEAEAATR_	F1MSQ6	57.7506484985352	1	NaN	NaN	NaN	NaN	185	0	1	2377	2559
20140904-PurClathDigest-1ug-01	2565	30.343	14.987	3191800	0	NaN	551080	0.35	-	-1		0	75	379.219417806783	756.424282680367	2	MULTI	HCD	FTMS	0	0	0	-1	0	0	0	0	6				NaN	1	NaN	NaN	NaN	NaN	186	0	1	2377	2559
20140904-PurClathDigest-1ug-01	2566	30.345	11.913	1084400	0	NaN	76709	0.35	-	-1		0	83	391.191316592696	1170.55212037829	3	MULTI	HCD	FTMS	0	0	0	-1	0	0	0	0	7				NaN	1	NaN	NaN	NaN	NaN	187	0	1	2377	2559
20140904-PurClathDigest-1ug-01	2568	30.356	5.286	7492400	0	NaN	840390	0.42	-	-1		0	110	570.30060693308	1707.87999139944	3	MULTI	HCD	FTMS	0	0	0	-1	0	0	0	0	1				NaN	1	NaN	NaN	NaN	NaN	188	0	1	2378	2567
20140904-PurClathDigest-1ug-01	2569	30.36	6.393	45285000	0	NaN	9774500	0.35	+	2295	KWREEQR	7	147	344.517402051052	1030.53037675335	3	MULTI	HCD	FTMS	0	0	0	-1	0	0	0	0	2	Unmodified	_KWREEQR_	G3N252;P04975	76.7621231079102	1	NaN	NaN	NaN	NaN	189	0	1	2378	2567
20140904-PurClathDigest-1ug-01	2570	30.363	11.22	4911700	0	NaN	958910	0.36	+	4151	SVSEGHLKR	9	68	338.189442323291	1011.54649757007	3	MULTI	HCD	FTMS	0	0	0	-1	0	0	0	0	3	Unmodified	_SVSEGHLKR_	Q28115	70.6560287475586	1	NaN	NaN	NaN	NaN	190	0	1	2378	2567
20140904-PurClathDigest-1ug-01	2571	30.366	13.447	569540	0	NaN	51816	0.36	-	-1		0	71	702.581639782886	2806.29745326514	4	MULTI	HCD	FTMS	0	0	0	-1	0	0	0	0	4				NaN	1	NaN	NaN	NaN	NaN	191	0	1	2378	2567
20140904-PurClathDigest-1ug-01	2572	30.369	21.042	19637000	0	NaN	4198600	0.37	+	2296	KWREEQR	7	143	516.272303756824	1030.53005458045	2	MULTI	HCD	FTMS	0	0	0	-1	0	0	0	0	5	Unmodified	_KWREEQR_	G3N252;P04975	165.146606445313	1	NaN	NaN	NaN	NaN	192	0	1	2378	2567
20140904-PurClathDigest-1ug-01	2573	30.372	17.67	1889900	0	NaN	167160	0.36	+	4195	TEAQAKEPGKEASTPGK	17	128	576.963486571998	1727.86863031619	3	MULTI	HCD	FTMS	0	0	0	-1	0	0	0	0	6	Unmodified	_TEAQAKEPGKEASTPGK_	F1MSQ6	98.8866882324219	1	NaN	NaN	NaN	NaN	193	0	1	2378	2567
20140904-PurClathDigest-1ug-01	2574	30.375	19.132	6934600	0	NaN	562710	0.36	-	-1		0	155	397.871719336398	1190.59332860939	3	MULTI	HCD	FTMS	0	0	0	-1	0	0	0	0	7				NaN	1	NaN	NaN	NaN	NaN	194	0	1	2378	2567
20140904-PurClathDigest-1ug-01	2576	30.386	3.005	1016700	0	NaN	112300	0.42	-	-1		0	35	452.225082504721	902.435612076243	2	MULTI	HCD	FTMS	0	0	0	-1	0	0	0	0	1				NaN	1	NaN	NaN	NaN	NaN	195	0	1	2379	2575
20140904-PurClathDigest-1ug-01	2577	30.39	5.888	8086700	0	NaN	997170	0.35	+	3104	NHEEEMKDLR	10	112	439.534638025601	1315.582084677	3	MULTI	HCD	FTMS	0	0	0	-1	0	0	0	0	2	Oxidation (M)	_NHEEEM(ox)KDLR_	CON__P13645	67.8232498168945	1	NaN	NaN	NaN	NaN	196	0	1	2379	2575
20140904-PurClathDigest-1ug-01	2578	30.393	6.572	10123000	0	NaN	2163900	0.35	-	-1		0	101	338.84230565304	1013.50508755932	3	MULTI	HCD	FTMS	0	0	0	-1	0	0	0	0	3				NaN	1	NaN	NaN	NaN	NaN	197	0	1	2379	2575
20140904-PurClathDigest-1ug-01	2579	30.396	10.06	3405900	0	NaN	713360	0.35	+	4237	TKVEAPK	7	72	386.731836410465	771.449119887729	2	MULTI	HCD	FTMS	0	0	0	-1	0	0	0	0	4	Unmodified	_TKVEAPK_	F1MDZ2;O77788	91.7124176025391	1	NaN	NaN	NaN	NaN	198	0	1	2379	2575
20140904-PurClathDigest-1ug-01	2580	30.399	13.15	6114000	0	NaN	1025200	0.36	-	-1		0	89	334.179943129744	666.345333326288	2	MULTI	HCD	FTMS	0	0	0	-1	0	0	0	0	5				NaN	1	NaN	NaN	NaN	NaN	199	0	1	2379	2575
20140904-PurClathDigest-1ug-01	2581	30.402	11.322	28219000	0	NaN	1820100	0.35	+	2120	KIHEEEVR	8	161	347.188856209476	1038.54473922863	3	MULTI	HCD	FTMS	0	0	0	-1	0	0	0	0	6	Unmodified	_KIHEEEVR_	Q28115	104.103401184082	1	NaN	NaN	NaN	NaN	200	0	1	2379	2575
20140904-PurClathDigest-1ug-01	2582	30.404	16.365	6425200	0	NaN	1227400	0.36	+	13	AAKDEVSESR	10	121	546.269782584088	1090.52501223498	2	MULTI	HCD	FTMS	0	0	0	-1	0	0	0	0	7	Unmodified	_AAKDEVSESR_	P02548	132.49560546875	1	NaN	NaN	NaN	NaN	201	0	1	2379	2575
20140904-PurClathDigest-1ug-01	2584	30.416	11.138	5526400	0	NaN	1036000	0.42	+	2121	KIHEEEVR	8	98	520.279783724144	1038.54501451509	2	MULTI	HCD	FTMS	0	0	0	-1	0	0	0	0	1	Unmodified	_KIHEEEVR_	Q28115	143.895004272461	1	NaN	NaN	NaN	NaN	202	0	1	2380	2583
20140904-PurClathDigest-1ug-01	2585	30.42	14.787	1819200	0	NaN	293740	0.36	+	14	AAKDEVSESR	10	77	364.515550363832	NaN	0	PEAK	HCD	FTMS	0	0	0	-1	0	0	0	0	2	Unmodified	_AAKDEVSESR_	P02548	110.609100341797	1	NaN	NaN	NaN	NaN	203	0	1	2380	2583
20140904-PurClathDigest-1ug-01	2586	30.422	24.708	2177100	0	NaN	122400	0.37	-	-1		0	106	543.765975064089	NaN	0	PEAK	HCD	FTMS	0	0	0	-1	0	0	0	0	3				NaN	1	NaN	NaN	NaN	NaN	204	0	1	2380	2583
20140904-PurClathDigest-1ug-01	2587	30.426	13.996	4134900	0	NaN	171730	0.36	-	-1		0	173	600.037157483341	2396.11952406696	4	MULTI	HCD	FTMS	0	0	0	-1	0	0	0	0	4				NaN	1	NaN	NaN	NaN	NaN	205	0	1	2380	2583
20140904-PurClathDigest-1ug-01	2588	30.429	13.778	5123900	0	NaN	170660	0.36	-	-1		0	182	480.230735741102	2396.11729637251	5	MULTI	HCD	FTMS	0	0	0	-1	0	0	0	0	5				NaN	1	NaN	NaN	NaN	NaN	206	0	1	2380	2583
20140904-PurClathDigest-1ug-01	2589	30.432	21.67	1365200	0	NaN	88485	0.37	-	-1		0	92	341.513868044335	1021.51977473321	3	MULTI	HCD	FTMS	0	0	0	-1	0	0	0	0	6				NaN	1	NaN	NaN	NaN	NaN	207	0	1	2380	2583
20140904-PurClathDigest-1ug-01	2590	30.435	22.848	13770000	0	NaN	1021600	0.36	+	3118	NKPGVYTK	8	164	302.839614103479	905.497012910636	3	MULTI	HCD	FTMS	0	0	0	-1	0	0	0	0	7	Unmodified	_NKPGVYTK_	CON__P07477;E1BQ07;G3N0B7;P00760;CON__P00761;E1BFR6;G3MXS2	60.6506614685059	1	NaN	NaN	NaN	NaN	208	0	1	2380	2583
20140904-PurClathDigest-1ug-01	2592	30.446	0.703	218040000	0	NaN	29629000	0.4	+	3119	NKPGVYTK	8	114	453.755534817113	905.496516701027	2	MULTI	HCD	FTMS	0	0	0	-1	0	0	0	0	1	Unmodified	_NKPGVYTK_	CON__P07477;E1BQ07;G3N0B7;P00760;CON__P00761;E1BFR6;G3MXS2	66.1761016845703	1	NaN	NaN	NaN	NaN	209	0	1	2381	2591
20140904-PurClathDigest-1ug-01	2593	30.449	4.51	14349000	0	NaN	2039900	0.35	+	3495	REEVAEEGAK	10	95	559.277495401956	1116.54043787071	2	MULTI	HCD	FTMS	0	0	0	-1	0	0	0	0	2	Unmodified	_REEVAEEGAK_	F1N3M8;G3MYP5	232.718505859375	1	NaN	NaN	NaN	NaN	210	0	1	2381	2591
20140904-PurClathDigest-1ug-01	2594	30.452	11.148	5537100	0	NaN	1005200	0.36	+	4668	VKDEVSAEK	9	96	502.766466425011	1003.51837991682	2	MULTI	HCD	FTMS	0	0	0	-1	0	0	0	0	3	Unmodified	_VKDEVSAEK_	F1MEW3	123.879501342773	1	NaN	NaN	NaN	NaN	211	0	1	2381	2591
20140904-PurClathDigest-1ug-01	2595	30.455	9.614	4411700	0	NaN	444040	0.36	+	2153	KMEEKAEEVAPK	12	146	468.905590440305	1403.69494192111	3	MULTI	HCD	FTMS	0	0	0	-1	0	0	0	0	4	Oxidation (M)	_KM(ox)EEKAEEVAPK_	F1MDZ2;O77788	41.227481842041	1	NaN	NaN	NaN	NaN	212	0	1	2381	2591
20140904-PurClathDigest-1ug-01	2596	30.458	12.462	19020000	0	NaN	1294500	0.36	-	-1		0	164	460.600958632053	1378.78104649636	3	MULTI	HCD	FTMS	0	0	0	-1	0	0	0	0	5				NaN	1	NaN	NaN	NaN	NaN	213	0	1	2381	2591
20140904-PurClathDigest-1ug-01	2597	30.461	21.356	1418900	0	NaN	190430	0.37	-	-1		0	144	702.855402235495	1403.69625153779	2	MULTI	HCD	FTMS	0	0	0	-1	0	0	0	0	6				NaN	1	NaN	NaN	NaN	NaN	214	0	1	2381	2591
20140904-PurClathDigest-1ug-01	2598	30.464	15.522	1223800	0	NaN	157190	0.36	+	537	DEASEQDKAPEEKDK	15	101	573.595005373424	1717.76318672047	3	MULTI	HCD	FTMS	0	0	0	-1	0	0	0	0	7	Unmodified	_DEASEQDKAPEEKDK_	F1N3M8;G3MYP5	80.3582916259766	1	NaN	NaN	NaN	NaN	215	0	1	2381	2591
20140904-PurClathDigest-1ug-01	2600	30.475	7.466	9137700	0	NaN	722230	0.4	-	-1		0	80	357.660035726524	713.305518519849	2	MULTI	HCD	FTMS	0	0	0	-1	0	0	0	0	1				NaN	1	NaN	NaN	NaN	NaN	216	0	1	2382	2599
20140904-PurClathDigest-1ug-01	2601	30.479	13.346	2687600	0	NaN	351490	0.36	-	-1		0	103	611.789182086057	1221.56381123891	2	MULTI	HCD	FTMS	0	0	0	-1	0	0	0	0	2				NaN	1	NaN	NaN	NaN	NaN	217	0	1	2382	2599
20140904-PurClathDigest-1ug-01	2602	30.482	10.354	4675700	0	NaN	1005400	0.35	-	-1		0	107	426.546015371453	1276.61621671456	3	MULTI	HCD	FTMS	0	0	0	-1	0	0	0	0	3				NaN	1	NaN	NaN	NaN	NaN	218	0	1	2382	2599
20140904-PurClathDigest-1ug-01	2603	30.485	13.436	2304000	0	NaN	114230	0.36	-	-1		0	138	709.589050586261	2834.32709647864	4	MULTI	HCD	FTMS	0	0	0	-1	0	0	0	0	4				NaN	1	NaN	NaN	NaN	NaN	219	0	1	2382	2599
20140904-PurClathDigest-1ug-01	2604	30.488	21.916	1193600	0	NaN	262620	0.37	-	-1		0	78	575.267512143992	1148.52047135478	2	MULTI	HCD	FTMS	0	0	0	-1	0	0	0	0	5				NaN	1	NaN	NaN	NaN	NaN	220	0	1	2382	2599
20140904-PurClathDigest-1ug-01	2605	30.491	14.101	1799700	0	NaN	73307	0.36	-	-1		0	123	543.940953754005	1628.80103186222	3	MULTI	HCD	FTMS	0	0	0	-1	0	0	0	0	6				NaN	1	NaN	NaN	NaN	NaN	221	0	1	2382	2599
20140904-PurClathDigest-1ug-01	2606	30.494	29.502	95558	0	NaN	24045	0.38	-	-1		0	27	561.829507184321	1121.64446143544	2	MULTI	HCD	FTMS	0	0	0	-1	0	0	0	0	7				NaN	1	NaN	NaN	NaN	NaN	222	0	1	2382	2599
20140904-PurClathDigest-1ug-01	2608	30.505	16.176	408970	0	NaN	25937	0.41	-	-1		0	66	945.78251290573	2834.32570931739	3	MULTI	HCD	FTMS	0	0	0	-1	0	0	0	0	1				NaN	1	NaN	NaN	NaN	NaN	223	0	1	2383	2607
20140904-PurClathDigest-1ug-01	2609	30.509	26.316	2293400	0	NaN	83449	0.37	-	-1		0	153	403.203258215727	1206.58794524738	3	MULTI	HCD	FTMS	0	0	0	-1	0	0	0	0	2				NaN	1	NaN	NaN	NaN	NaN	224	0	1	2383	2607
20140904-PurClathDigest-1ug-01	2610	30.512	25.377	4822700	0	NaN	343290	0.37	+	4299	TPPKSPATPK	10	129	341.866061624838	1022.57635547471	3	MULTI	HCD	FTMS	0	0	0	-1	0	0	0	0	3	Unmodified	_TPPKSPATPK_	F1MEW3	100.492401123047	1	NaN	NaN	NaN	NaN	225	0	1	2383	2607
20140904-PurClathDigest-1ug-01	2611	30.515	32.205	1703500	0	NaN	216500	0.38	-	-1		0	135	639.814958813248	2555.23072938659	4	MULTI	HCD	FTMS	0	0	0	-1	0	0	0	0	4				NaN	1	NaN	NaN	NaN	NaN	226	0	1	2383	2607
20140904-PurClathDigest-1ug-01	2612	30.519	40.729	3189300	0	NaN	273570	0.38	+	4293	TPHTPGTPK	9	140	312.503156132029	934.487638996286	3	MULTI	HCD	FTMS	0	0	0	-1	0	0	0	0	5	Unmodified	_TPHTPGTPK_	F1MEW3	131.497100830078	1	NaN	NaN	NaN	NaN	227	0	1	2383	2607
20140904-PurClathDigest-1ug-01	2613	30.522	64.248	406920	0	NaN	35917	0.41	+	4545	VEEPQKDQPDK	11	94	656.822197902198	1311.6298428712	2	MULTI	HCD	FTMS	0	0	0	-1	0	0	0	0	6	Unmodified	_VEEPQKDQPDK_	F1MEW3	165.921798706055	1	NaN	NaN	NaN	NaN	228	0	1	2383	2607
20140904-PurClathDigest-1ug-01	2614	30.526	62.351	390780	0	NaN	24131	0.41	-	-1		0	94	499.736025337361	997.457497741523	2	MULTI	HCD	FTMS	0	0	0	-1	0	0	0	0	7				NaN	1	NaN	NaN	NaN	NaN	229	0	1	2383	2607
20140904-PurClathDigest-1ug-01	2616	30.538	8.323	10713000	0	NaN	1530300	0.41	-	-1		0	80	401.737285906223	801.460018879247	2	MULTI	HCD	FTMS	0	0	0	-1	0	0	0	0	1				NaN	1	NaN	NaN	NaN	NaN	230	0	1	2384	2615
20140904-PurClathDigest-1ug-01	2617	30.542	9.846	12682000	0	NaN	1122400	0.36	+	4638	VHELEQQNK	9	137	562.790584858473	1123.56661678375	2	MULTI	HCD	FTMS	0	0	0	-1	0	0	0	0	2	Unmodified	_VHELEQQNK_	P02548	203.246307373047	1	NaN	NaN	NaN	NaN	231	0	1	2384	2615
20140904-PurClathDigest-1ug-01	2618	30.545	10.064	2191400	0	NaN	76622	0.36	-	-1		0	105	636.310651381749	2541.2134996606	4	MULTI	HCD	FTMS	0	0	0	-1	0	0	0	0	3				NaN	1	NaN	NaN	NaN	NaN	232	0	1	2384	2615
20140904-PurClathDigest-1ug-01	2619	30.548	20.415	9515400	0	NaN	1312400	0.37	+	4640	VHELEQQNK	9	134	375.529409637095	1123.56639951149	3	MULTI	HCD	FTMS	0	0	0	-1	0	0	0	0	4	Unmodified	_VHELEQQNK_	P02548	97.3076171875	1	NaN	NaN	NaN	NaN	233	0	1	2384	2615
20140904-PurClathDigest-1ug-01	2620	30.551	23.426	739380	0	NaN	32870	0.37	-	-1		0	100	848.078294725159	2541.21305477568	3	MULTI	HCD	FTMS	0	0	0	-1	0	0	0	0	5				NaN	1	NaN	NaN	NaN	NaN	234	0	1	2384	2615
20140904-PurClathDigest-1ug-01	2621	30.554	29.648	3582200	0	NaN	256480	0.38	+	4294	TPHTPGTPK	9	133	468.250847983594	934.487143033988	2	MULTI	HCD	FTMS	0	0	0	-1	0	0	0	0	6	Unmodified	_TPHTPGTPK_	F1MEW3	160.572494506836	1	NaN	NaN	NaN	NaN	235	0	1	2384	2615
20140904-PurClathDigest-1ug-01	2622	30.557	18.317	1905300	0	NaN	87740	0.37	-	-1		0	135	536.278635618383	2141.08543660713	4	MULTI	HCD	FTMS	0	0	0	-1	0	0	0	0	7				NaN	1	NaN	NaN	NaN	NaN	236	0	1	2384	2615
20140904-PurClathDigest-1ug-01	2624	30.568	7.162	9751600	0	NaN	967410	0.41	-	-1		0	134	497.90757966821	1490.70090960483	3	MULTI	HCD	FTMS	0	0	0	-1	0	0	0	0	1				NaN	1	NaN	NaN	NaN	NaN	237	0	1	2385	2623
20140904-PurClathDigest-1ug-01	2625	30.572	13.645	4386200	0	NaN	650700	0.36	+	2184	KSPTPVAEAK	10	111	514.292993536613	1026.57143414003	2	MULTI	HCD	FTMS	0	0	0	-1	0	0	0	0	2	Unmodified	_KSPTPVAEAK_	F1N1S2	113.103996276855	1	NaN	NaN	NaN	NaN	238	0	1	2385	2623
20140904-PurClathDigest-1ug-01	2626	30.575	19.531	2707700	0	NaN	311050	0.35	-	-1		0	69	366.218673076829	730.422793220457	2	MULTI	HCD	FTMS	0	0	0	-1	0	0	0	0	3				NaN	1	NaN	NaN	NaN	NaN	239	0	1	2385	2623
20140904-PurClathDigest-1ug-01	2627	30.578	22.009	4266500	0	NaN	244070	0.37	+	1514	HQGVMVGMGQK	11	147	602.28420584576	1202.55385875832	2	MULTI	HCD	FTMS	0	0	0	-1	0	0	0	0	4	2 Oxidation (M)	_HQGVM(ox)VGM(ox)GQK_	F1MRD0;P60712;Q3ZC07;Q5E9B5;P62739;P63258;P68138;G8JKX4	61.9375991821289	1	NaN	NaN	NaN	NaN	240	0	1	2385	2623
20140904-PurClathDigest-1ug-01	2628	30.581	16.756	1034800	0	NaN	36383	0.37	-	-1		0	94	822.895263704306	3287.55194895082	4	MULTI	HCD	FTMS	0	0	0	-1	0	0	0	0	5				NaN	1	NaN	NaN	NaN	NaN	241	0	1	2385	2623
20140904-PurClathDigest-1ug-01	2629	30.584	18.2	8927100	0	NaN	284740	0.36	+	665	DSSKVEEPQKDQPDK	15	188	577.279458647011	1728.81654654123	3	MULTI	HCD	FTMS	0	0	0	-1	0	0	0	0	6	Unmodified	_DSSKVEEPQKDQPDK_	F1MEW3	300.600494384766	1	NaN	NaN	NaN	NaN	242	0	1	2385	2623
20140904-PurClathDigest-1ug-01	2630	30.587	18.526	2054600	0	NaN	168080	0.34	-	-1		0	89	345.702710146501	1378.7817347196	4	MULTI	HCD	FTMS	0	0	0	-1	0	0	0	0	7				NaN	1	NaN	NaN	NaN	NaN	243	0	1	2385	2623
20140904-PurClathDigest-1ug-01	2632	30.598	18.773	1647300	0	NaN	121960	0.41	+	666	DSSKVEEPQKDQPDK	15	123	865.41600404848	1728.81745516376	2	MULTI	HCD	FTMS	0	0	0	-1	0	0	0	0	1	Unmodified	_DSSKVEEPQKDQPDK_	F1MEW3	208.973602294922	1	NaN	NaN	NaN	NaN	244	0	1	2386	2631
20140904-PurClathDigest-1ug-01	2633	30.602	13.239	2327100	0	NaN	82575	0.36	-	-1		0	118	646.318825638514	2581.24619668766	4	MULTI	HCD	FTMS	0	0	0	-1	0	0	0	0	2				NaN	1	NaN	NaN	NaN	NaN	245	0	1	2386	2631
20140904-PurClathDigest-1ug-01	2634	30.605	15.168	722240	0	NaN	24631	0.36	-	-1		0	87	658.517200426151	3287.54961979775	5	MULTI	HCD	FTMS	0	0	0	-1	0	0	0	0	3				NaN	1	NaN	NaN	NaN	NaN	246	0	1	2386	2631
20140904-PurClathDigest-1ug-01	2635	30.608	29.485	2790300	0	NaN	303850	0.38	+	590	DKVSDGVTK	9	117	474.753715730236	947.492878527271	2	MULTI	HCD	FTMS	0	0	0	-1	0	0	0	0	4	Unmodified	_DKVSDGVTK_	F1MEW3	109.136100769043	1	NaN	NaN	NaN	NaN	247	0	1	2386	2631
20140904-PurClathDigest-1ug-01	2636	30.611	32.92	731490	0	NaN	77308	0.38	-	-1		0	93	746.358041512647	1490.70153009209	2	MULTI	HCD	FTMS	0	0	0	-1	0	0	0	0	5				NaN	1	NaN	NaN	NaN	NaN	248	0	1	2386	2631
20140904-PurClathDigest-1ug-01	2637	30.615	30.626	159560	0	NaN	22402	0.38	-	-1		0	52	844.371615664643	2530.09301759413	3	MULTI	HCD	FTMS	0	0	0	-1	0	0	0	0	6				NaN	1	NaN	NaN	NaN	NaN	249	0	1	2386	2631
20140904-PurClathDigest-1ug-01	2638	30.618	25.1	2833700	0	NaN	185770	0.37	-	-1		0	189	654.575529093252	2614.27301050661	4	MULTI	HCD	FTMS	0	0	0	-1	0	0	0	0	7				NaN	1	NaN	NaN	NaN	NaN	250	0	1	2386	2631
20140904-PurClathDigest-1ug-01	2640	30.629	1.551	100990000	0	NaN	21210000	0.4	+	2301	KWREEQTER	9	144	421.214318026453	1260.62112467956	3	MULTI	HCD	FTMS	0	0	0	-1	0	0	0	0	1	Unmodified	_KWREEQTER_	P04973	114.248497009277	1	NaN	NaN	NaN	NaN	251	0	1	2387	2639
20140904-PurClathDigest-1ug-01	2641	30.633	6.213	25209000	0	NaN	7047800	0.35	+	2304	KWREEQTER	9	137	631.317440217685	1260.62032750217	2	MULTI	HCD	FTMS	0	0	0	-1	0	0	0	0	2	Unmodified	_KWREEQTER_	P04973	221.481597900391	1	NaN	NaN	NaN	NaN	252	0	1	2387	2639
20140904-PurClathDigest-1ug-01	2642	30.636	11.082	779200	0	NaN	83221	0.36	-	-1		0	67	567.270307142129	1132.52606135106	2	MULTI	HCD	FTMS	0	0	0	-1	0	0	0	0	3				NaN	1	NaN	NaN	NaN	NaN	253	0	1	2387	2639
20140904-PurClathDigest-1ug-01	2643	30.639	12.43	2235400	0	NaN	703070	0.36	+	4149	SVSEGHLK	8	73	428.729822039112	855.445091145023	2	MULTI	HCD	FTMS	0	0	0	-1	0	0	0	0	4	Unmodified	_SVSEGHLK_	Q28115	81.768798828125	1	NaN	NaN	NaN	NaN	254	0	1	2387	2639
20140904-PurClathDigest-1ug-01	2644	30.642	14.533	599660	0	NaN	26994	0.36	-	-1		0	82	832.902939947824	3327.5826539249	4	MULTI	HCD	FTMS	0	0	0	-1	0	0	0	0	5				NaN	1	NaN	NaN	NaN	NaN	255	0	1	2387	2639
20140904-PurClathDigest-1ug-01	2645	30.645	19.195	317350	0	NaN	26392	0.37	-	-1		0	67	860.070630207069	2577.19006122141	3	MULTI	HCD	FTMS	0	0	0	-1	0	0	0	0	6				NaN	1	NaN	NaN	NaN	NaN	256	0	1	2387	2639
20140904-PurClathDigest-1ug-01	2646	30.648	13.283	688560	0	NaN	22591	0.36	-	-1		0	81	666.523393021884	3327.58058277642	5	MULTI	HCD	FTMS	0	0	0	-1	0	0	0	0	7				NaN	1	NaN	NaN	NaN	NaN	257	0	1	2387	2639
20140904-PurClathDigest-1ug-01	2648	30.659	3.069	69737000	0	NaN	6460200	0.4	+	4283	TPDTIRR	7	104	429.74270218674	857.470851440279	2	MULTI	HCD	FTMS	0	0	0	-1	0	0	0	0	1	Unmodified	_TPDTIRR_	P49951;F1MPU0	105.971298217773	1	NaN	NaN	NaN	NaN	258	0	1	2388	2647
20140904-PurClathDigest-1ug-01	2649	30.662	6.487	6503900	0	NaN	845690	0.35	-	-1		0	81	379.219236101005	756.423919268811	2	MULTI	HCD	FTMS	0	0	0	-1	0	0	0	0	2				NaN	1	NaN	NaN	NaN	NaN	259	0	1	2388	2647
20140904-PurClathDigest-1ug-01	2650	30.665	13.25	7224500	0	NaN	346470	0.35	-	-1		0	142	369.52838013845	NaN	0	PEAK	HCD	FTMS	0	0	0	-1	0	0	0	0	3				NaN	1	NaN	NaN	NaN	NaN	260	0	1	2388	2647
20140904-PurClathDigest-1ug-01	2651	30.668	17.541	517680	0	NaN	65887	0.36	-	-1		0	41	330.693062371801	659.371571810401	2	MULTI	HCD	FTMS	0	0	0	-1	0	0	0	0	4				NaN	1	NaN	NaN	NaN	NaN	261	0	1	2388	2647
20140904-PurClathDigest-1ug-01	2652	30.671	15.719	4621100	0	NaN	218200	0.36	-	-1		0	174	471.994033003139	1883.94702614616	4	MULTI	HCD	FTMS	0	0	0	-1	0	0	0	0	5				NaN	1	NaN	NaN	NaN	NaN	262	0	1	2388	2647
20140904-PurClathDigest-1ug-01	2653	30.674	28.836	294560	0	NaN	38163	0.38	-	-1		0	54	558.756807167435	1115.49906140167	2	MULTI	HCD	FTMS	0	0	0	-1	0	0	0	0	6				NaN	1	NaN	NaN	NaN	NaN	263	0	1	2388	2647
20140904-PurClathDigest-1ug-01	2654	30.677	31.885	603660	0	NaN	82773	0.38	-	-1		0	93	474.230248477945	946.44594402269	2	MULTI	HCD	FTMS	0	0	0	-1	0	0	0	0	7				NaN	1	NaN	NaN	NaN	NaN	264	0	1	2388	2647
20140904-PurClathDigest-1ug-01	2656	30.689	11.607	9014500	0	NaN	551040	0.41	+	2933	LTEAAEQNK	9	127	502.256505988535	1002.49845904387	2	MULTI	HCD	FTMS	0	0	0	-1	0	0	0	0	1	Unmodified	_LTEAAEQNK_	F1MDZ2;O77788	141.994995117188	1	NaN	NaN	NaN	NaN	265	0	1	2389	2655
20140904-PurClathDigest-1ug-01	2657	30.693	14.229	3961000	0	NaN	194470	0.36	-	-1		0	129	542.601490768161	1624.78264290468	3	MULTI	HCD	FTMS	0	0	0	-1	0	0	0	0	2				NaN	1	NaN	NaN	NaN	NaN	266	0	1	2389	2655
20140904-PurClathDigest-1ug-01	2658	30.696	16.105	3591600	0	NaN	272330	0.36	-	-1		0	147	555.778061136318	2219.08313867887	4	MULTI	HCD	FTMS	0	0	0	-1	0	0	0	0	3				NaN	1	NaN	NaN	NaN	NaN	267	0	1	2389	2655
20140904-PurClathDigest-1ug-01	2659	30.699	22.5	904040	0	NaN	53025	0.37	-	-1		0	90	311.659898990679	1242.61049009632	4	MULTI	HCD	FTMS	0	0	0	-1	0	0	0	0	4				NaN	1	NaN	NaN	NaN	NaN	268	0	1	2389	2655
20140904-PurClathDigest-1ug-01	2660	30.702	42.54	692440	0	NaN	91530	0.39	-	-1		0	112	813.398837922208	1624.78312291122	2	MULTI	HCD	FTMS	0	0	0	-1	0	0	0	0	5				NaN	1	NaN	NaN	NaN	NaN	269	0	1	2389	2655
20140904-PurClathDigest-1ug-01	2661	30.705	33.612	2720200	0	NaN	563070	0.38	-	-1		0	87	407.730354044226	813.446155155252	2	MULTI	HCD	FTMS	0	0	0	-1	0	0	0	0	6				NaN	1	NaN	NaN	NaN	NaN	270	0	1	2389	2655
20140904-PurClathDigest-1ug-01	2662	30.709	34.383	1423800	0	NaN	94422	0.38	-	-1		0	120	588.276081828064	1174.53761072293	2	MULTI	HCD	FTMS	0	0	0	-1	0	0	0	0	7				NaN	1	NaN	NaN	NaN	NaN	271	0	1	2389	2655
20140904-PurClathDigest-1ug-01	2664	30.72	3.494	11719000	0	NaN	555950	0.37	-	-1		0	150	524.497326034163	2093.96019827025	4	MULTI	HCD	FTMS	0	0	0	-1	0	0	0	0	1				NaN	1	NaN	NaN	NaN	NaN	272	0	1	2390	2663
20140904-PurClathDigest-1ug-01	2665	30.723	7.31	4035200	0	NaN	215280	0.36	+	722	EAEEEEKKDEGAGEEQATK	19	139	702.981716277326	2105.92331943218	3	MULTI	HCD	FTMS	0	0	0	-1	0	0	0	0	2	Unmodified	_EAEEEEKKDEGAGEEQATK_	P02548	169.12629699707	1	NaN	NaN	NaN	NaN	273	0	1	2390	2663
20140904-PurClathDigest-1ug-01	2666	30.726	8.052	1939500	0	NaN	138410	0.35	-	-1		0	108	698.994218857076	2093.96082717143	3	MULTI	HCD	FTMS	0	0	0	-1	0	0	0	0	3				NaN	1	NaN	NaN	NaN	NaN	274	0	1	2390	2663
20140904-PurClathDigest-1ug-01	2667	30.729	13.664	3162000	0	NaN	298280	0.36	-	-1		0	139	740.702092202454	2219.08444720756	3	MULTI	HCD	FTMS	0	0	0	-1	0	0	0	0	4				NaN	1	NaN	NaN	NaN	NaN	275	0	1	2390	2663
20140904-PurClathDigest-1ug-01	2668	30.732	12.822	21587000	0	NaN	1365700	0.36	+	2170	KQEAEWKEK	9	182	392.540009977962	1174.59820053409	3	MULTI	HCD	FTMS	0	0	0	-1	0	0	0	0	5	Unmodified	_KQEAEWKEK_	P04973	155.428802490234	1	NaN	NaN	NaN	NaN	276	0	1	2390	2663
20140904-PurClathDigest-1ug-01	2669	30.735	23.791	859890	0	NaN	69407	0.37	-	-1		0	104	942.980863306762	1883.94717368032	2	MULTI	HCD	FTMS	0	0	0	-1	0	0	0	0	6				NaN	1	NaN	NaN	NaN	NaN	277	0	1	2390	2663
20140904-PurClathDigest-1ug-01	2670	30.738	37.191	831110	0	NaN	61644	0.39	+	723	EAEEEEKKDEGAGEEQATK	19	142	1053.96986755652	2105.92518217984	2	MULTI	HCD	FTMS	0	0	0	-1	0	0	0	0	7	Unmodified	_EAEEEEKKDEGAGEEQATK_	P02548	284.823913574219	1	NaN	NaN	NaN	NaN	278	0	1	2390	2663
20140904-PurClathDigest-1ug-01	2672	30.75	4.565	6419700	0	NaN	356510	0.38	-	-1		0	117	628.989865967811	1883.94776850363	3	MULTI	HCD	FTMS	0	0	0	-1	0	0	0	0	1				NaN	1	NaN	NaN	NaN	NaN	279	0	1	2391	2671
20140904-PurClathDigest-1ug-01	2673	30.754	21.988	2993500	0	NaN	359380	0.37	-	-1		0	109	467.735192646966	NaN	0	PEAK	HCD	FTMS	0	0	0	-1	0	0	0	0	2				NaN	1	NaN	NaN	NaN	NaN	280	0	1	2391	2671
20140904-PurClathDigest-1ug-01	2674	30.757	25.843	1455200	0	NaN	195130	0.37	-	-1		0	93	656.247099583783	1310.47964623437	2	MULTI	HCD	FTMS	0	0	0	-1	0	0	0	0	3				NaN	1	NaN	NaN	NaN	NaN	281	0	1	2391	2671
20140904-PurClathDigest-1ug-01	2675	30.76	21.79	2484100	0	NaN	248090	0.37	-	-1		0	94	437.833281217091	1310.47801425147	3	MULTI	HCD	FTMS	0	0	0	-1	0	0	0	0	4				NaN	1	NaN	NaN	NaN	NaN	282	0	1	2391	2671
20140904-PurClathDigest-1ug-01	2676	30.763	32.482	3214500	0	NaN	491640	0.38	+	1743	ISKLEEK	7	99	423.750267264518	845.485981595835	2	MULTI	HCD	FTMS	0	0	0	-1	0	0	0	0	5	Unmodified	_ISKLEEK_	F1N3M8;G3MYP5	123.113403320313	1	NaN	NaN	NaN	NaN	283	0	1	2391	2671
20140904-PurClathDigest-1ug-01	2677	30.766	28	58665	0	NaN	8299.4	0.38	-	-1		0	27	595.966803204615	1784.87858021404	3	MULTI	HCD	FTMS	0	0	0	-1	0	0	0	0	6				NaN	1	NaN	NaN	NaN	NaN	284	0	1	2391	2671
20140904-PurClathDigest-1ug-01	2678	30.77	21.31	5499600	0	NaN	312820	0.37	-	-1		0	167	444.82364481157	2219.08184172485	5	MULTI	HCD	FTMS	0	0	0	-1	0	0	0	0	7				NaN	1	NaN	NaN	NaN	NaN	285	0	1	2391	2671
20140904-PurClathDigest-1ug-01	2680	30.781	4.043	21654000	0	NaN	1168800	0.39	+	4831	VTSHAIVK	8	89	427.758417052833	853.502281172467	2	MULTI	HCD	FTMS	0	0	0	-1	0	0	0	0	1	Unmodified	_VTSHAIVK_	F1MDZ2;O77788	125.004402160645	1	NaN	NaN	NaN	NaN	286	0	1	2392	2679
20140904-PurClathDigest-1ug-01	2681	30.784	7.873	10779000	0	NaN	411050	0.36	-	-1		0	150	441.568681699581	1321.68421569894	3	MULTI	HCD	FTMS	0	0	0	-1	0	0	0	0	2				NaN	1	NaN	NaN	NaN	NaN	287	0	1	2392	2679
20140904-PurClathDigest-1ug-01	2682	30.787	8.343	12052000	0	NaN	1338700	0.35	-	-1		0	166	463.23202531899	1386.67424655717	3	MULTI	HCD	FTMS	0	0	0	-1	0	0	0	0	3				NaN	1	NaN	NaN	NaN	NaN	288	0	1	2392	2679
20140904-PurClathDigest-1ug-01	2683	30.79	19.381	4889200	0	NaN	585670	0.37	+	432	ASREEIHEYRR	11	116	482.579560316372	1444.71685154931	3	MULTI	HCD	FTMS	0	0	0	-1	0	0	0	0	4	Unmodified	_ASREEIHEYRR_	Q08DH7	109.83570098877	1	NaN	NaN	NaN	NaN	289	0	1	2392	2679
20140904-PurClathDigest-1ug-01	2684	30.793	16.046	7869500	0	NaN	601650	0.36	+	433	ASREEIHEYRR	11	139	362.186779185675	1444.7180108763	4	MULTI	HCD	FTMS	0	0	0	-1	0	0	0	0	5	Unmodified	_ASREEIHEYRR_	Q08DH7	98.6594390869141	1	NaN	NaN	NaN	NaN	290	0	1	2392	2679
20140904-PurClathDigest-1ug-01	2685	30.796	32.892	1247800	0	NaN	159430	0.38	+	4639	VHELEQQNK	9	95	562.790584858473	1123.56661678375	2	MULTI	HCD	FTMS	0	0	0	-1	0	0	0	0	6	Unmodified	_VHELEQQNK_	P02548	91.2214736938477	1	NaN	NaN	NaN	NaN	291	0	1	2392	2679
20140904-PurClathDigest-1ug-01	2686	30.8	21.545	5658000	0	NaN	380570	0.37	+	3848	SKPSAASPKPGALK	14	133	446.929404857572	1337.76638517292	3	MULTI	HCD	FTMS	0	0	0	-1	0	0	0	0	7	Unmodified	_SKPSAASPKPGALK_	F1N1S2	69.9497909545898	1	NaN	NaN	NaN	NaN	292	0	1	2392	2679
20140904-PurClathDigest-1ug-01	2688	30.811	8.846	4042500	0	NaN	560840	0.39	+	3386	QKLQDETNQR	10	88	630.320571709663	1258.62659048613	2	MULTI	HCD	FTMS	0	0	0	-1	0	0	0	0	1	Unmodified	_QKLQDETNQR_	Q28115	159.378402709961	1	NaN	NaN	NaN	NaN	293	0	1	2393	2687
20140904-PurClathDigest-1ug-01	2689	30.814	12.294	4041200	0	NaN	401850	0.36	-	-1		0	151	572.778015624757	2287.08295663263	4	MULTI	HCD	FTMS	0	0	0	-1	0	0	0	0	2				NaN	1	NaN	NaN	NaN	NaN	294	0	1	2393	2687
20140904-PurClathDigest-1ug-01	2690	30.817	24.466	919510	0	NaN	214370	0.37	-	-1		0	92	694.344703593542	1386.67485425388	2	MULTI	HCD	FTMS	0	0	0	-1	0	0	0	0	3				NaN	1	NaN	NaN	NaN	NaN	295	0	1	2393	2687
20140904-PurClathDigest-1ug-01	2691	30.821	20.143	1132100	0	NaN	70891	0.37	-	-1		0	107	491.906858933517	1472.69874740075	3	MULTI	HCD	FTMS	0	0	0	-1	0	0	0	0	4				NaN	1	NaN	NaN	NaN	NaN	296	0	1	2393	2687
20140904-PurClathDigest-1ug-01	2692	30.824	27.205	243140	0	NaN	14289	0.38	-	-1		0	67	679.30799535579	2034.90215666757	3	MULTI	HCD	FTMS	0	0	0	-1	0	0	0	0	5				NaN	1	NaN	NaN	NaN	NaN	297	0	1	2393	2687
20140904-PurClathDigest-1ug-01	2693	30.827	29.713	2112600	0	NaN	117350	0.38	-	-1		0	188	763.367966690528	2287.08207067178	3	MULTI	HCD	FTMS	0	0	0	-1	0	0	0	0	6				NaN	1	NaN	NaN	NaN	NaN	298	0	1	2393	2687
20140904-PurClathDigest-1ug-01	2694	30.83	48.222	369820	0	NaN	23108	0.4	-	-1		0	87	661.849601987569	1321.68465104194	2	MULTI	HCD	FTMS	0	0	0	-1	0	0	0	0	7				NaN	1	NaN	NaN	NaN	NaN	299	0	1	2393	2687
20140904-PurClathDigest-1ug-01	2696	30.842	3.874	19558000	0	NaN	1341200	0.4	+	3363	QDEQLQK	7	104	444.724992790771	887.435432648341	2	MULTI	HCD	FTMS	0	0	0	-1	0	0	0	0	1	Unmodified	_QDEQLQK_	P04973	180.395599365234	1	NaN	NaN	NaN	NaN	300	0	1	2394	2695
20140904-PurClathDigest-1ug-01	2697	30.845	10.489	6814200	0	NaN	304720	0.35	+	1896	KDEVLEEKDK	10	117	411.550804558295	1231.63058427509	3	MULTI	HCD	FTMS	0	0	0	-1	0	0	0	0	2	Unmodified	_KDEVLEEKDK_	F1N3M8;G3MYP5	142.873504638672	1	NaN	NaN	NaN	NaN	301	0	1	2394	2695
20140904-PurClathDigest-1ug-01	2698	30.848	17.39	1249800	0	NaN	211650	0.35	-	-1		0	47	304.655757915045	607.296962896891	2	MULTI	HCD	FTMS	0	0	0	-1	0	0	0	0	3				NaN	1	NaN	NaN	NaN	NaN	302	0	1	2394	2695
20140904-PurClathDigest-1ug-01	2699	30.851	14.098	5094800	0	NaN	744760	0.36	+	1968	KEPSTVSRDEVR	12	146	468.2477558414	1401.7214381244	3	MULTI	HCD	FTMS	0	0	0	-1	0	0	0	0	4	Unmodified	_KEPSTVSRDEVR_	F1MEW3	86.9576263427734	1	NaN	NaN	NaN	NaN	303	0	1	2394	2695
20140904-PurClathDigest-1ug-01	2700	30.854	29.668	4808200	0	NaN	1483000	0.38	-	-1		0	83	608.30377056286	NaN	0	PEAK	HCD	FTMS	0	0	0	-1	0	0	0	0	5				NaN	1	NaN	NaN	NaN	NaN	304	0	1	2394	2695
20140904-PurClathDigest-1ug-01	2701	30.858	20.624	3006800	0	NaN	747440	0.36	+	3571	RLGPGTR	7	99	378.727092047086	755.439631160971	2	MULTI	HCD	FTMS	0	0	0	-1	0	0	0	0	6	Unmodified	_RLGPGTR_	Q28115	116.195999145508	1	NaN	NaN	NaN	NaN	305	0	1	2394	2695
20140904-PurClathDigest-1ug-01	2702	30.861	26.09	1442200	0	NaN	90988	0.37	+	1897	KDEVLEEKDK	10	110	616.822174018006	1231.62979510281	2	MULTI	HCD	FTMS	0	0	0	-1	0	0	0	0	7	Unmodified	_KDEVLEEKDK_	F1N3M8;G3MYP5	191.072204589844	1	NaN	NaN	NaN	NaN	306	0	1	2394	2695
20140904-PurClathDigest-1ug-01	2704	30.872	12.02	4927900	0	NaN	309240	0.39	+	4682	VKTESSEALKAEK	13	146	473.928214587406	1418.76281436242	3	MULTI	HCD	FTMS	0	0	0	-1	0	0	0	0	1	Unmodified	_VKTESSEALKAEK_	F1N3M8;G3MYP5	141.132095336914	1	NaN	NaN	NaN	NaN	307	0	1	2395	2703
20140904-PurClathDigest-1ug-01	2705	30.876	21.103	3605600	0	NaN	613280	0.37	+	4676	VKTESSEALK	10	127	546.301218475061	1090.58788401692	2	MULTI	HCD	FTMS	0	0	0	-1	0	0	0	0	2	Unmodified	_VKTESSEALK_	F1N3M8;G3MYP5	126.760299682617	1	NaN	NaN	NaN	NaN	308	0	1	2395	2703
20140904-PurClathDigest-1ug-01	2706	30.879	19.224	2877900	0	NaN	651950	0.36	+	2302	KWREEQTER	9	130	421.214318026453	1260.62112467956	3	MULTI	HCD	FTMS	0	0	0	-1	0	0	0	0	3	Unmodified	_KWREEQTER_	P04973	65.0053024291992	1	NaN	NaN	NaN	NaN	309	0	1	2395	2703
20140904-PurClathDigest-1ug-01	2707	30.882	39.741	389860	0	NaN	31241	0.39	-	-1		0	107	1144.54884790505	2287.08314287689	2	MULTI	HCD	FTMS	0	0	0	-1	0	0	0	0	4				NaN	1	NaN	NaN	NaN	NaN	310	0	1	2395	2703
20140904-PurClathDigest-1ug-01	2708	30.885	31.993	2490300	0	NaN	512080	0.38	-	-1		0	149	496.534394075531	1486.58135282679	3	MULTI	HCD	FTMS	0	0	0	-1	0	0	0	0	5				NaN	1	NaN	NaN	NaN	NaN	311	0	1	2395	2703
20140904-PurClathDigest-1ug-01	2709	30.889	49.081	4191400	0	NaN	474170	0.4	-	-1		0	142	562.250908158824	1122.48726338445	2	MULTI	HCD	FTMS	0	0	0	-1	0	0	0	0	6				NaN	1	NaN	NaN	NaN	NaN	312	0	1	2395	2703
20140904-PurClathDigest-1ug-01	2710	30.892	62.047	444820	0	NaN	88834	0.41	+	1464	HMDPPPAPMQDR	12	94	712.308746274153	1422.60293961511	2	MULTI	HCD	FTMS	0	0	0	-1	0	0	0	0	7	2 Oxidation (M)	_HM(ox)DPPPAPM(ox)QDR_	F1N1S2	81.4052581787109	1	NaN	NaN	NaN	NaN	313	0	1	2395	2703
20140904-PurClathDigest-1ug-01	2712	30.904	3.983	14804000	0	NaN	455510	0.38	-	-1		0	171	483.82891968462	2414.1082160901	5	MULTI	HCD	FTMS	0	0	0	-1	0	0	0	0	1				NaN	1	NaN	NaN	NaN	NaN	314	0	1	2396	2711
20140904-PurClathDigest-1ug-01	2713	30.908	23.587	1294100	0	NaN	131100	0.37	+	4677	VKTESSEALK	10	110	364.536501072316	1090.58767381715	3	MULTI	HCD	FTMS	0	0	0	-1	0	0	0	0	2	Unmodified	_VKTESSEALK_	F1N3M8;G3MYP5	69.3815231323242	1	NaN	NaN	NaN	NaN	315	0	1	2396	2711
20140904-PurClathDigest-1ug-01	2714	30.911	26.515	1805100	0	NaN	84219	0.37	-	-1		0	156	805.710308833207	2414.10909709982	3	MULTI	HCD	FTMS	0	0	0	-1	0	0	0	0	3				NaN	1	NaN	NaN	NaN	NaN	316	0	1	2396	2711
20140904-PurClathDigest-1ug-01	2715	30.914	48.297	723560	0	NaN	201370	0.4	-	-1		0	129	744.298389638408	1486.58222634362	2	MULTI	HCD	FTMS	0	0	0	-1	0	0	0	0	4				NaN	1	NaN	NaN	NaN	NaN	317	0	1	2396	2711
20140904-PurClathDigest-1ug-01	2716	30.918	43.451	157680	0	NaN	9630.6	0.4	-	-1		0	66	755.61039546152	3018.41247597968	4	MULTI	HCD	FTMS	0	0	0	-1	0	0	0	0	5				NaN	1	NaN	NaN	NaN	NaN	318	0	1	2396	2711
20140904-PurClathDigest-1ug-01	2717	30.921	55.101	1469100	0	NaN	198290	0.39	+	3503	RGLDDDRGPR	10	111	386.199541240563	1155.57679432189	3	MULTI	HCD	FTMS	0	0	0	-1	0	0	0	0	6	Unmodified	_RGLDDDRGPR_	E1B7R4	110.694900512695	1	NaN	NaN	NaN	NaN	319	0	1	2396	2711
20140904-PurClathDigest-1ug-01	2718	30.925	50.903	1018600	0	NaN	56718	0.4	-	-1		0	126	383.847521821141	1148.52073606362	3	MULTI	HCD	FTMS	0	0	0	-1	0	0	0	0	7				NaN	1	NaN	NaN	NaN	NaN	320	0	1	2396	2711
20140904-PurClathDigest-1ug-01	2720	30.937	3.297	10074000	0	NaN	498570	0.38	-	-1		0	134	604.534374171134	2414.10839081814	4	MULTI	HCD	FTMS	0	0	0	-1	0	0	0	0	1				NaN	1	NaN	NaN	NaN	NaN	321	0	1	2397	2719
20140904-PurClathDigest-1ug-01	2721	30.94	16.043	19946000	0	NaN	4475500	0.36	+	4947	WREEQR	6	123	452.224773666248	902.434994399296	2	MULTI	HCD	FTMS	0	0	0	-1	0	0	0	0	2	Unmodified	_WREEQR_	F1MX40;G3N252;P04975	112.885498046875	1	NaN	NaN	NaN	NaN	322	0	1	2397	2719
20140904-PurClathDigest-1ug-01	2722	30.943	27.098	3933100	0	NaN	233670	0.37	+	3243	NNRPSEGPLQTR	12	155	456.903768049326	1367.68947474818	3	MULTI	HCD	FTMS	0	0	0	-1	0	0	0	0	3	Unmodified	_NNRPSEGPLQTR_	P49951;F1MPU0	137.333297729492	1	NaN	NaN	NaN	NaN	323	0	1	2397	2719
20140904-PurClathDigest-1ug-01	2723	30.946	47.31	4838000	0	NaN	600300	0.39	+	3449	QRLDDEAR	8	155	501.751527172833	1001.48850141247	2	MULTI	HCD	FTMS	0	0	0	-1	0	0	0	0	4	Unmodified	_QRLDDEAR_	F1MSQ6	214.547805786133	1	NaN	NaN	NaN	NaN	324	0	1	2397	2719
20140904-PurClathDigest-1ug-01	2724	30.95	32.402	1543700	0	NaN	81174	0.38	-	-1		0	134	669.092845001409	2672.34227413924	4	MULTI	HCD	FTMS	0	0	0	-1	0	0	0	0	5				NaN	1	NaN	NaN	NaN	NaN	325	0	1	2397	2719
20140904-PurClathDigest-1ug-01	2725	30.953	30.243	3885900	0	NaN	225640	0.38	-	-1		0	185	535.475547574078	2672.34135553739	5	MULTI	HCD	FTMS	0	0	0	-1	0	0	0	0	6				NaN	1	NaN	NaN	NaN	NaN	326	0	1	2397	2719
20140904-PurClathDigest-1ug-01	2726	30.956	68.025	3500400	0	NaN	591410	0.42	+	3455	QRSELEDR	8	149	516.757129133173	1031.49970533315	2	MULTI	HCD	FTMS	0	0	0	-1	0	0	0	0	7	Unmodified	_QRSELEDR_	F1MSQ6	189.887100219727	1	NaN	NaN	NaN	NaN	327	0	1	2397	2719
20140904-PurClathDigest-1ug-01	2728	30.969	4.175	34585000	0	NaN	6463800	0.39	+	4948	WREEQR	6	107	301.819048839292	902.435317118077	3	MULTI	HCD	FTMS	0	0	0	-1	0	0	0	0	1	Unmodified	_WREEQR_	F1MX40;G3N252;P04975	77.9546966552734	1	NaN	NaN	NaN	NaN	328	0	1	2398	2727
20140904-PurClathDigest-1ug-01	2729	30.972	8.544	8532400	0	NaN	1069400	0.35	-	-1		0	111	497.769124646299	993.523696359399	2	MULTI	HCD	FTMS	0	0	0	-1	0	0	0	0	2				NaN	1	NaN	NaN	NaN	NaN	329	0	1	2398	2727
20140904-PurClathDigest-1ug-01	2730	30.975	17.107	6150600	0	NaN	627730	0.36	+	3348	QALQGER	7	90	401.214296356622	800.414039780045	2	MULTI	HCD	FTMS	0	0	0	-1	0	0	0	0	3	Unmodified	_QALQGER_	P02548	144.360198974609	1	NaN	NaN	NaN	NaN	330	0	1	2398	2727
20140904-PurClathDigest-1ug-01	2731	30.978	18.861	735130	0	NaN	75564	0.36	-	-1		0	65	359.185531957669	716.356510982138	2	MULTI	HCD	FTMS	0	0	0	-1	0	0	0	0	4				NaN	1	NaN	NaN	NaN	NaN	331	0	1	2398	2727
20140904-PurClathDigest-1ug-01	2732	30.981	20.108	4773100	0	NaN	1410500	0.36	-	-1		0	84	329.703383339044	657.392213744888	2	MULTI	HCD	FTMS	0	0	0	-1	0	0	0	0	5				NaN	1	NaN	NaN	NaN	NaN	332	0	1	2398	2727
20140904-PurClathDigest-1ug-01	2733	30.984	17.349	2777800	0	NaN	276400	0.35	+	3450	QRLDDEAR	8	105	334.837074350931	1001.48939365299	3	MULTI	HCD	FTMS	0	0	0	-1	0	0	0	0	6	Unmodified	_QRLDDEAR_	F1MSQ6	143	1	NaN	NaN	NaN	NaN	333	0	1	2398	2727
20140904-PurClathDigest-1ug-01	2734	30.987	47.107	912870	0	NaN	311070	0.4	+	3244	NNRPSEGPLQTR	12	96	684.852384107734	1367.69021528227	2	MULTI	HCD	FTMS	0	0	0	-1	0	0	0	0	7	Unmodified	_NNRPSEGPLQTR_	P49951;F1MPU0	101.903900146484	1	NaN	NaN	NaN	NaN	334	0	1	2398	2727
20140904-PurClathDigest-1ug-01	2736	30.999	13.575	4230900	0	NaN	502570	0.4	+	3964	SPVKEEEKPQEVR	13	116	518.941819587118	1553.80362936156	3	MULTI	HCD	FTMS	0	0	0	-1	0	0	0	0	1	Unmodified	_SPVKEEEKPQEVR_	F1MSQ6	174.95329284668	1	NaN	NaN	NaN	NaN	335	0	1	2399	2735
20140904-PurClathDigest-1ug-01	2737	31.003	30.309	1758300	0	NaN	285180	0.38	-	-1		0	104	578.795638881722	1155.57672483024	2	MULTI	HCD	FTMS	0	0	0	-1	0	0	0	0	2				NaN	1	NaN	NaN	NaN	NaN	336	0	1	2399	2735
20140904-PurClathDigest-1ug-01	2738	31.006	19.034	3509200	0	NaN	339800	0.36	+	3965	SPVKEEEKPQEVR	13	111	389.458420748819	1553.80457712888	4	MULTI	HCD	FTMS	0	0	0	-1	0	0	0	0	3	Unmodified	_SPVKEEEKPQEVR_	F1MSQ6	134.289901733398	1	NaN	NaN	NaN	NaN	337	0	1	2399	2735
20140904-PurClathDigest-1ug-01	2739	31.009	17.75	894460	0	NaN	55706	0.37	-	-1		0	104	524.497326034163	2093.96019827025	4	MULTI	HCD	FTMS	0	0	0	-1	0	0	0	0	4				NaN	1	NaN	NaN	NaN	NaN	338	0	1	2399	2735
20140904-PurClathDigest-1ug-01	2740	31.012	62.627	172440	0	NaN	14478	0.4	-	-1		0	74	350.180159395578	NaN	0	PEAK	HCD	FTMS	0	0	0	-1	0	0	0	0	5				NaN	1	NaN	NaN	NaN	NaN	339	0	1	2399	2735
20140904-PurClathDigest-1ug-01	2741	31.016	61.479	811970	0	NaN	160270	0.4	-	-1		0	87	435.198609313611	868.382665694022	2	MULTI	HCD	FTMS	0	0	0	-1	0	0	0	0	6				NaN	1	NaN	NaN	NaN	NaN	340	0	1	2399	2735
20140904-PurClathDigest-1ug-01	2742	31.019	39.738	141730	0	NaN	15381	0.39	-	-1		0	51	698.994218857076	2093.96082717143	3	MULTI	HCD	FTMS	0	0	0	-1	0	0	0	0	7				NaN	1	NaN	NaN	NaN	NaN	341	0	1	2399	2735
20140904-PurClathDigest-1ug-01	2744	31.031	19.497	4469600	0	NaN	392700	0.41	-	-1		0	111	395.535007578753	1183.58319333646	3	MULTI	HCD	FTMS	0	0	0	-1	0	0	0	0	1				NaN	1	NaN	NaN	NaN	NaN	342	0	1	2400	2743
20140904-PurClathDigest-1ug-01	2745	31.035	37.632	2500500	0	NaN	416630	0.38	-	-1		0	111	512.26977422249	1022.52499551178	2	MULTI	HCD	FTMS	0	0	0	-1	0	0	0	0	2				NaN	1	NaN	NaN	NaN	NaN	343	0	1	2400	2743
20140904-PurClathDigest-1ug-01	2746	31.038	25.478	4859000	0	NaN	561310	0.37	+	758	EEIHEYRR	8	127	377.856081871606	1130.54641621502	3	MULTI	HCD	FTMS	0	0	0	-1	0	0	0	0	3	Unmodified	_EEIHEYRR_	Q08DH7	99.346809387207	1	NaN	NaN	NaN	NaN	344	0	1	2400	2743
20140904-PurClathDigest-1ug-01	2747	31.041	50.833	1121200	0	NaN	85182	0.4	+	3966	SPVKEEEKPQEVR	13	111	777.909407813289	1553.80426269338	2	MULTI	HCD	FTMS	0	0	0	-1	0	0	0	0	4	Unmodified	_SPVKEEEKPQEVR_	F1MSQ6	226.925201416016	1	NaN	NaN	NaN	NaN	345	0	1	2400	2743
20140904-PurClathDigest-1ug-01	2748	31.045	47.296	3443300	0	NaN	396770	0.4	-	-1		0	135	592.798366489004	1183.58218004481	2	MULTI	HCD	FTMS	0	0	0	-1	0	0	0	0	5				NaN	1	NaN	NaN	NaN	NaN	346	0	1	2400	2743
20140904-PurClathDigest-1ug-01	2749	31.049	53.425	1094000	0	NaN	184410	0.4	+	2971	LVEDEERR	8	119	523.267046784649	1044.5195406361	2	MULTI	HCD	FTMS	0	0	0	-1	0	0	0	0	6	Unmodified	_LVEDEERR_	E1BDX8	151.968399047852	1	NaN	NaN	NaN	NaN	347	0	1	2400	2743
20140904-PurClathDigest-1ug-01	2750	31.052	79.077	2974900	0	NaN	312260	0.43	+	759	EEIHEYRR	8	131	566.28113514774	1130.54771736228	2	MULTI	HCD	FTMS	0	0	0	-1	0	0	0	0	7	Unmodified	_EEIHEYRR_	Q08DH7	169.046493530273	1	NaN	NaN	NaN	NaN	348	0	1	2400	2743
20140904-PurClathDigest-1ug-01	2752	31.065	10.761	8933300	0	NaN	2062400	0.39	+	3688	SAASLNSR	8	87	403.211248172072	804.407943410944	2	MULTI	HCD	FTMS	0	0	0	-1	0	0	0	0	1	Unmodified	_SAASLNSR_	P00760	147.468307495117	1	NaN	NaN	NaN	NaN	349	0	1	2401	2751
20140904-PurClathDigest-1ug-01	2753	31.068	18.531	2054900	0	NaN	714350	0.37	+	2131	KLDPAQSASR	10	75	536.790639400491	1071.56672586778	2	MULTI	HCD	FTMS	0	0	0	-1	0	0	0	0	2	Unmodified	_KLDPAQSASR_	E1BFB0	139.377899169922	1	NaN	NaN	NaN	NaN	350	0	1	2401	2751
20140904-PurClathDigest-1ug-01	2754	31.071	32.58	3628600	0	NaN	477440	0.38	-	-1		0	120	371.852507377193	1112.53569273178	3	MULTI	HCD	FTMS	0	0	0	-1	0	0	0	0	3				NaN	1	NaN	NaN	NaN	NaN	351	0	1	2401	2751
20140904-PurClathDigest-1ug-01	2755	31.074	69.008	181180	0	NaN	22516	0.42	-	-1		0	89	882.412118951958	3525.61936994143	4	MULTI	HCD	FTMS	0	0	0	-1	0	0	0	0	4				NaN	1	NaN	NaN	NaN	NaN	352	0	1	2401	2751
20140904-PurClathDigest-1ug-01	2756	31.078	105.26	228210	0	NaN	13917	0.44	-	-1		0	112	735.34663521618	1468.67871749916	2	MULTI	HCD	FTMS	0	0	0	-1	0	0	0	0	5				NaN	1	NaN	NaN	NaN	NaN	353	0	1	2401	2751
20140904-PurClathDigest-1ug-01	2757	31.083	78.97	159920	0	NaN	8989.6	0.43	-	-1		0	102	767.37085026879	2299.09072140657	3	MULTI	HCD	FTMS	0	0	0	-1	0	0	0	0	6				NaN	1	NaN	NaN	NaN	NaN	354	0	1	2401	2751
20140904-PurClathDigest-1ug-01	2758	31.087	55.407	1702700	0	NaN	263540	0.4	-	-1		0	128	429.443160657453	1713.74353676341	4	MULTI	HCD	FTMS	0	0	0	-1	0	0	0	0	7				NaN	1	NaN	NaN	NaN	NaN	355	0	1	2401	2751
20140904-PurClathDigest-1ug-01	2760	31.099	14.651	3729800	0	NaN	467310	0.39	-	-1		0	134	569.948027915254	1706.82225434596	3	MULTI	HCD	FTMS	0	0	0	-1	0	0	0	0	1				NaN	1	NaN	NaN	NaN	NaN	356	0	1	2402	2759
20140904-PurClathDigest-1ug-01	2761	31.102	15.559	4129100	0	NaN	506690	0.36	-	-1		0	154	572.255208056629	1713.74379477009	3	MULTI	HCD	FTMS	0	0	0	-1	0	0	0	0	2				NaN	1	NaN	NaN	NaN	NaN	357	0	1	2402	2759
20140904-PurClathDigest-1ug-01	2762	31.105	18.002	3672200	0	NaN	137910	0.36	-	-1		0	153	501.242366029445	1500.70526868854	3	MULTI	HCD	FTMS	0	0	0	-1	0	0	0	0	3				NaN	1	NaN	NaN	NaN	NaN	358	0	1	2402	2759
20140904-PurClathDigest-1ug-01	2763	31.108	28.828	1430600	0	NaN	217250	0.38	-	-1		0	122	668.306591785361	1334.59863063752	2	MULTI	HCD	FTMS	0	0	0	-1	0	0	0	0	4				NaN	1	NaN	NaN	NaN	NaN	359	0	1	2402	2759
20140904-PurClathDigest-1ug-01	2764	31.112	23.439	3329300	0	NaN	240980	0.37	-	-1		0	138	445.87368203997	1334.59921672011	3	MULTI	HCD	FTMS	0	0	0	-1	0	0	0	0	5				NaN	1	NaN	NaN	NaN	NaN	360	0	1	2402	2759
20140904-PurClathDigest-1ug-01	2765	31.115	76.173	625330	0	NaN	24929	0.42	-	-1		0	154	495.567287753701	1483.6800338613	3	MULTI	HCD	FTMS	0	0	0	-1	0	0	0	0	6				NaN	1	NaN	NaN	NaN	NaN	361	0	1	2402	2759
20140904-PurClathDigest-1ug-01	2766	31.119	123.28	288730	0	NaN	25007	0.47	-	-1		0	98	454.725025968552	NaN	0	PEAK	HCD	FTMS	0	0	0	-1	0	0	0	0	7				NaN	1	NaN	NaN	NaN	NaN	362	0	1	2402	2759
20140904-PurClathDigest-1ug-01	2768	31.132	8.969	5947000	0	NaN	503610	0.39	-	-1		0	148	427.71279009625	1706.8220545186	4	MULTI	HCD	FTMS	0	0	0	-1	0	0	0	0	1				NaN	1	NaN	NaN	NaN	NaN	363	0	1	2403	2767
20140904-PurClathDigest-1ug-01	2769	31.135	23.558	3715300	0	NaN	1099100	0.37	-	-1		0	99	477.285423298532	952.556293663864	2	MULTI	HCD	FTMS	0	0	0	-1	0	0	0	0	2				NaN	1	NaN	NaN	NaN	NaN	364	0	1	2403	2767
20140904-PurClathDigest-1ug-01	2770	31.139	34.596	2280000	0	NaN	720280	0.38	-	-1		0	107	487.754075737639	973.493598542079	2	MULTI	HCD	FTMS	0	0	0	-1	0	0	0	0	3				NaN	1	NaN	NaN	NaN	NaN	365	0	1	2403	2767
20140904-PurClathDigest-1ug-01	2771	31.142	44.217	30700	0	NaN	3435	0.39	-	-1		0	23	511.267480124029	NaN	0	PEAK	HCD	FTMS	0	0	0	-1	0	0	0	0	4				NaN	1	NaN	NaN	NaN	NaN	366	0	1	2403	2767
20140904-PurClathDigest-1ug-01	2772	31.146	44.608	1006300	0	NaN	183200	0.39	+	617	DLSSSEKQEHVK	12	126	462.899653719334	1385.6771317582	3	MULTI	HCD	FTMS	0	0	0	-1	0	0	0	0	5	Unmodified	_DLSSSEKQEHVK_	F1MIC9	85.5792007446289	1	NaN	NaN	NaN	NaN	367	0	1	2403	2767
20140904-PurClathDigest-1ug-01	2773	31.149	63.262	1395400	0	NaN	374480	0.41	+	3656	RQQVLDR	7	95	457.761580944203	913.508608955206	2	MULTI	HCD	FTMS	0	0	0	-1	0	0	0	0	6	Unmodified	_RQQVLDR_	E1BFB0	174.303207397461	1	NaN	NaN	NaN	NaN	368	0	1	2403	2767
20140904-PurClathDigest-1ug-01	2774	31.153	77.154	521420	0	NaN	86513	0.43	-	-1		0	111	854.418118210322	1706.82168348744	2	MULTI	HCD	FTMS	0	0	0	-1	0	0	0	0	7				NaN	1	NaN	NaN	NaN	NaN	369	0	1	2403	2767
20140904-PurClathDigest-1ug-01	2776	31.165	2.43	24839000	0	NaN	2762000	0.38	+	1938	KDSLYK	6	79	377.210523316912	752.406493700623	2	MULTI	HCD	FTMS	0	0	0	-1	0	0	0	0	1	Unmodified	_KDSLYK_	P49951;F1MPU0	113.96199798584	1	NaN	NaN	NaN	NaN	370	0	1	2404	2775
20140904-PurClathDigest-1ug-01	2777	31.169	10.766	2888600	0	NaN	103850	0.35	-	-1		0	125	483.82891968462	2414.1082160901	5	MULTI	HCD	FTMS	0	0	0	-1	0	0	0	0	2				NaN	1	NaN	NaN	NaN	NaN	371	0	1	2404	2775
20140904-PurClathDigest-1ug-01	2778	31.171	22.041	2202500	0	NaN	201010	0.37	-	-1		0	137	432.232936525231	1293.67698017589	3	MULTI	HCD	FTMS	0	0	0	-1	0	0	0	0	3				NaN	1	NaN	NaN	NaN	NaN	372	0	1	2404	2775
20140904-PurClathDigest-1ug-01	2779	31.175	30.024	636190	0	NaN	30144	0.38	+	4037	STPSQVTPAEEKDGHSPMSK	20	114	710.33227420513	2127.97499321559	3	MULTI	HCD	FTMS	0	0	0	-1	0	0	0	0	4	Oxidation (M)	_STPSQVTPAEEKDGHSPM(ox)SK_	F1N3M8;G3MYP5	66.3095397949219	1	NaN	NaN	NaN	NaN	373	0	1	2404	2775
20140904-PurClathDigest-1ug-01	2780	31.178	86.457	129390	0	NaN	33897	0.44	-	-1		0	66	857.878321278672	1713.74208962414	2	MULTI	HCD	FTMS	0	0	0	-1	0	0	0	0	5				NaN	1	NaN	NaN	NaN	NaN	374	0	1	2404	2775
20140904-PurClathDigest-1ug-01	2781	31.182	57.37	1295700	0	NaN	261380	0.4	+	2303	KWREEQTER	9	132	421.214318026453	1260.62112467956	3	MULTI	HCD	FTMS	0	0	0	-1	0	0	0	0	6	Unmodified	_KWREEQTER_	P04973	54.003101348877	1	NaN	NaN	NaN	NaN	375	0	1	2404	2775
20140904-PurClathDigest-1ug-01	2782	31.186	61.342	218920	0	NaN	11237	0.41	-	-1		0	103	533.000986323412	2127.97483942725	4	MULTI	HCD	FTMS	0	0	0	-1	0	0	0	0	7				NaN	1	NaN	NaN	NaN	NaN	376	0	1	2404	2775
20140904-PurClathDigest-1ug-01	2784	31.198	23.726	3036200	0	NaN	917870	0.41	-	-1		0	83	452.224773666248	902.434994399296	2	MULTI	HCD	FTMS	0	0	0	-1	0	0	0	0	1				NaN	1	NaN	NaN	NaN	NaN	377	0	1	2405	2783
20140904-PurClathDigest-1ug-01	2785	31.202	77.04	765890	0	NaN	91930	0.42	-	-1		0	109	513.221377914296	1024.42820289539	2	MULTI	HCD	FTMS	0	0	0	-1	0	0	0	0	2				NaN	1	NaN	NaN	NaN	NaN	378	0	1	2405	2783
20140904-PurClathDigest-1ug-01	2786	31.206	63.959	1803300	0	NaN	267450	0.41	-	-1		0	88	387.851053023856	1160.53132967177	3	MULTI	HCD	FTMS	0	0	0	-1	0	0	0	0	3				NaN	1	NaN	NaN	NaN	NaN	379	0	1	2405	2783
20140904-PurClathDigest-1ug-01	2787	31.209	107.64	459370	0	NaN	76454	0.45	-	-1		0	106	522.254277073012	1042.49400121282	2	MULTI	HCD	FTMS	0	0	0	-1	0	0	0	0	4				NaN	1	NaN	NaN	NaN	NaN	380	0	1	2405	2783
20140904-PurClathDigest-1ug-01	2788	31.214	124.26	187080	0	NaN	11754	0.47	+	919	ESKEETPEVTK	11	116	638.816738269569	1275.61892360594	2	MULTI	HCD	FTMS	0	0	0	-1	0	0	0	0	5	Unmodified	_ESKEETPEVTK_	F1N1S2	126.247299194336	1	NaN	NaN	NaN	NaN	381	0	1	2405	2783
20140904-PurClathDigest-1ug-01	2789	31.219	137.52	670700	0	NaN	81336	0.48	+	4203	TESSEALKAEK	11	154	596.806523072226	1191.59849321125	2	MULTI	HCD	FTMS	0	0	0	-1	0	0	0	0	6	Unmodified	_TESSEALKAEK_	F1N3M8;G3MYP5	142.541305541992	1	NaN	NaN	NaN	NaN	382	0	1	2405	2783
20140904-PurClathDigest-1ug-01	2790	31.224	72.844	542740	0	NaN	39885	0.42	-	-1		0	127	794.376175380065	3966.84449456732	5	MULTI	HCD	FTMS	0	0	0	-1	0	0	0	0	7				NaN	1	NaN	NaN	NaN	NaN	383	0	1	2405	2783
20140904-PurClathDigest-1ug-01	2792	31.236	37.126	264290	0	NaN	44765	0.44	-	-1		0	72	625.318943576409	NaN	0	PEAK	HCD	FTMS	0	0	0	-1	0	0	0	0	1				NaN	1	NaN	NaN	NaN	NaN	384	0	1	2406	2791
20140904-PurClathDigest-1ug-01	2793	31.24	50.822	752560	0	NaN	55021	0.4	+	574	DKAGEPQDQAVEQK	14	127	771.87412078789	1541.73368864258	2	MULTI	HCD	FTMS	0	0	0	-1	0	0	0	0	2	Unmodified	_DKAGEPQDQAVEQK_	F1N3M8;G3MYP5	163.618606567383	1	NaN	NaN	NaN	NaN	385	0	1	2406	2791
20140904-PurClathDigest-1ug-01	2794	31.244	45.129	733640	0	NaN	45570	0.39	-	-1		0	100	475.732564194278	949.450575455357	2	MULTI	HCD	FTMS	0	0	0	-1	0	0	0	0	3				NaN	1	NaN	NaN	NaN	NaN	386	0	1	2406	2791
20140904-PurClathDigest-1ug-01	2795	31.247	61.261	847800	0	NaN	69965	0.4	+	542	DGEVIKESK	9	126	502.767128073939	1003.51970321468	2	MULTI	HCD	FTMS	0	0	0	-1	0	0	0	0	4	Unmodified	_DGEVIKESK_	Q28115	149.883102416992	1	NaN	NaN	NaN	NaN	387	0	1	2406	2791
20140904-PurClathDigest-1ug-01	2796	31.251	42.163	1987000	0	NaN	141830	0.4	-	-1		0	157	528.910893261854	1583.71085038576	3	MULTI	HCD	FTMS	0	0	0	-1	0	0	0	0	5				NaN	1	NaN	NaN	NaN	NaN	388	0	1	2406	2791
20140904-PurClathDigest-1ug-01	2797	31.255	81.022	884310	0	NaN	118140	0.42	-	-1		0	103	581.272363917384	1160.53017490157	2	MULTI	HCD	FTMS	0	0	0	-1	0	0	0	0	6				NaN	1	NaN	NaN	NaN	NaN	389	0	1	2406	2791
20140904-PurClathDigest-1ug-01	2798	31.259	55.813	496390	0	NaN	26491	0.4	+	575	DKAGEPQDQAVEQK	14	116	514.9182421171	1541.7328969515	3	MULTI	HCD	FTMS	0	0	0	-1	0	0	0	0	7	Unmodified	_DKAGEPQDQAVEQK_	F1N3M8;G3MYP5	121.676300048828	1	NaN	NaN	NaN	NaN	390	0	1	2406	2791
20140904-PurClathDigest-1ug-01	2800	31.27	9.301	7661600	0	NaN	1976200	0.41	+	3691	SAASLNSR	8	84	403.704046773747	805.393540614294	2	MULTI	HCD	FTMS	0	0	0	-1	0	0	0	0	1	Deamidation (NQ)	_SAASLN(de)SR_	P00760	183.079299926758	1	NaN	NaN	NaN	NaN	391	0	1	2407	2799
20140904-PurClathDigest-1ug-01	2801	31.274	36.098	1988600	0	NaN	251560	0.38	+	1010	EVAAEETAKPGPDK	14	114	721.362137799743	1440.70972266629	2	MULTI	HCD	FTMS	0	0	0	-1	0	0	0	0	2	Unmodified	_EVAAEETAKPGPDK_	G3MYP5	138.796905517578	1	NaN	NaN	NaN	NaN	392	0	1	2407	2799
20140904-PurClathDigest-1ug-01	2802	31.278	21.953	4678200	0	NaN	953130	0.37	-	-1		0	150	452.689882638787	1806.73042468875	4	MULTI	HCD	FTMS	0	0	0	-1	0	0	0	0	3				NaN	1	NaN	NaN	NaN	NaN	393	0	1	2407	2799
20140904-PurClathDigest-1ug-01	2803	31.281	45.281	2112100	0	NaN	434570	0.39	+	832	EKEPIAASTNR	11	107	608.320738687022	1214.62692444084	2	MULTI	HCD	FTMS	0	0	0	-1	0	0	0	0	4	Unmodified	_EKEPIAASTNR_	E1BFB0	118.966903686523	1	NaN	NaN	NaN	NaN	394	0	1	2407	2799
20140904-PurClathDigest-1ug-01	2804	31.284	30.727	2596600	0	NaN	459170	0.38	-	-1		0	181	603.250773014917	1806.73048964495	3	MULTI	HCD	FTMS	0	0	0	-1	0	0	0	0	5				NaN	1	NaN	NaN	NaN	NaN	395	0	1	2407	2799
20140904-PurClathDigest-1ug-01	2805	31.287	35.486	156600	0	NaN	19940	0.38	+	1011	EVAAEETAKPGPDK	14	53	481.244213078702	1440.71080983631	3	MULTI	HCD	FTMS	0	0	0	-1	0	0	0	0	6	Unmodified	_EVAAEETAKPGPDK_	G3MYP5	40.074089050293	1	NaN	NaN	NaN	NaN	396	0	1	2407	2799
20140904-PurClathDigest-1ug-01	2806	31.291	50.583	2522300	0	NaN	153020	0.4	+	286	ALEQKDEASEQDKAPEEK	18	212	682.327961979491	2043.96205653867	3	MULTI	HCD	FTMS	0	0	0	-1	0	0	0	0	7	Unmodified	_ALEQKDEASEQDKAPEEK_	F1N3M8;G3MYP5	203.310501098633	1	NaN	NaN	NaN	NaN	397	0	1	2407	2799
20140904-PurClathDigest-1ug-01	2808	31.302	7.541	9751200	0	NaN	1972600	0.4	+	1623	ILSSTTSK	8	94	418.74012207596	835.46569121872	2	MULTI	HCD	FTMS	0	0	0	-1	0	0	0	0	1	Unmodified	_ILSSTTSK_	Q08DH7	103.364898681641	1	NaN	NaN	NaN	NaN	398	0	1	2408	2807
20140904-PurClathDigest-1ug-01	2809	31.306	9.518	8502600	0	NaN	491050	0.36	-	-1		0	185	520.754399671467	2078.98849281947	4	MULTI	HCD	FTMS	0	0	0	-1	0	0	0	0	2				NaN	1	NaN	NaN	NaN	NaN	399	0	1	2408	2807
20140904-PurClathDigest-1ug-01	2810	31.309	17.513	7150900	0	NaN	408110	0.36	-	-1		0	196	530.249209579611	1587.72579933903	3	MULTI	HCD	FTMS	0	0	0	-1	0	0	0	0	3				NaN	1	NaN	NaN	NaN	NaN	400	0	1	2408	2807
20140904-PurClathDigest-1ug-01	2811	31.312	22.963	3462100	0	NaN	170740	0.37	-	-1		0	190	694.003104106353	2078.98748291926	3	MULTI	HCD	FTMS	0	0	0	-1	0	0	0	0	4				NaN	1	NaN	NaN	NaN	NaN	401	0	1	2408	2807
20140904-PurClathDigest-1ug-01	2812	31.315	29.761	2946700	0	NaN	132890	0.38	-	-1		0	157	431.549188106961	1291.62573492108	3	MULTI	HCD	FTMS	0	0	0	-1	0	0	0	0	5				NaN	1	NaN	NaN	NaN	NaN	402	0	1	2408	2807
20140904-PurClathDigest-1ug-01	2813	31.318	40.478	388080	0	NaN	23964	0.39	+	4038	STPSQVTPAEEKDGHSPMSK	20	104	1064.99537767816	2127.97620242312	2	MULTI	HCD	FTMS	0	0	0	-1	0	0	0	0	6	Oxidation (M)	_STPSQVTPAEEKDGHSPM(ox)SK_	F1N3M8;G3MYP5	43.2703895568848	1	NaN	NaN	NaN	NaN	403	0	1	2408	2807
20140904-PurClathDigest-1ug-01	2814	31.322	43.201	4005500	0	NaN	511380	0.39	-	-1		0	152	408.222455437038	814.430357940877	2	MULTI	HCD	FTMS	0	0	0	-1	0	0	0	0	7				NaN	1	NaN	NaN	NaN	NaN	404	0	1	2408	2807
20140904-PurClathDigest-1ug-01	2816	31.334	5.522	13657000	0	NaN	484830	0.39	-	-1		0	167	527.755161512785	2106.99154018474	4	MULTI	HCD	FTMS	0	0	0	-1	0	0	0	0	1				NaN	1	NaN	NaN	NaN	NaN	405	0	1	2409	2815
20140904-PurClathDigest-1ug-01	2817	31.337	7.856	15704000	0	NaN	483650	0.35	-	-1		0	192	422.405771364386	2106.99247448893	5	MULTI	HCD	FTMS	0	0	0	-1	0	0	0	0	2				NaN	1	NaN	NaN	NaN	NaN	406	0	1	2409	2815
20140904-PurClathDigest-1ug-01	2818	31.34	19.443	1082300	0	NaN	61335	0.37	-	-1		0	124	794.870827060343	1587.72710118749	2	MULTI	HCD	FTMS	0	0	0	-1	0	0	0	0	3				NaN	1	NaN	NaN	NaN	NaN	407	0	1	2409	2815
20140904-PurClathDigest-1ug-01	2819	31.343	20.173	2449600	0	NaN	305690	0.37	-	-1		0	92	569.292332529554	1136.57011212591	2	MULTI	HCD	FTMS	0	0	0	-1	0	0	0	0	4				NaN	1	NaN	NaN	NaN	NaN	408	0	1	2409	2815
20140904-PurClathDigest-1ug-01	2820	31.346	15.407	6851800	0	NaN	274170	0.36	-	-1		0	199	703.338096996785	2106.99246159055	3	MULTI	HCD	FTMS	0	0	0	-1	0	0	0	0	5				NaN	1	NaN	NaN	NaN	NaN	409	0	1	2409	2815
20140904-PurClathDigest-1ug-01	2821	31.349	21.05	15140000	0	NaN	801250	0.37	-	-1		0	149	379.863665318724	1136.56916655637	3	MULTI	HCD	FTMS	0	0	0	-1	0	0	0	0	6				NaN	1	NaN	NaN	NaN	NaN	410	0	1	2409	2815
20140904-PurClathDigest-1ug-01	2822	31.352	30.135	5027200	0	NaN	659270	0.38	-	-1		0	132	487.24713386079	972.479714788379	2	MULTI	HCD	FTMS	0	0	0	-1	0	0	0	0	7				NaN	1	NaN	NaN	NaN	NaN	411	0	1	2409	2815
20140904-PurClathDigest-1ug-01	2824	31.364	2.126	54843000	0	NaN	3816500	0.38	-	-1		0	98	379.741646933226	757.468740933251	2	MULTI	HCD	FTMS	0	0	0	-1	0	0	0	0	1				NaN	1	NaN	NaN	NaN	NaN	412	0	1	2410	2823
20140904-PurClathDigest-1ug-01	2825	31.367	8.18	10223000	0	NaN	566680	0.35	-	-1		0	110	454.212999613249	906.411446293298	2	MULTI	HCD	FTMS	0	0	0	-1	0	0	0	0	2				NaN	1	NaN	NaN	NaN	NaN	413	0	1	2410	2823
20140904-PurClathDigest-1ug-01	2826	31.37	9.683	2760900	0	NaN	183050	0.36	-	-1		0	121	560.479749579509	2797.36236556455	5	MULTI	HCD	FTMS	0	0	0	-1	0	0	0	0	3				NaN	1	NaN	NaN	NaN	NaN	414	0	1	2410	2823
20140904-PurClathDigest-1ug-01	2827	31.373	13.758	2304500	0	NaN	259930	0.36	-	-1		0	116	698.003128816734	2090.9875570504	3	MULTI	HCD	FTMS	0	0	0	-1	0	0	0	0	4				NaN	1	NaN	NaN	NaN	NaN	415	0	1	2410	2823
20140904-PurClathDigest-1ug-01	2828	31.376	27.444	3617200	0	NaN	429490	0.38	+	1342	GSPSTVSSSYKR	12	122	628.317161618167	1254.61977030313	2	MULTI	HCD	FTMS	0	0	0	-1	0	0	0	0	5	Unmodified	_GSPSTVSSSYKR_	F1MDZ2;O77788	158.22819519043	1	NaN	NaN	NaN	NaN	416	0	1	2410	2823
20140904-PurClathDigest-1ug-01	2829	31.379	29.973	1113400	0	NaN	49808	0.38	-	-1		0	142	1054.50418106668	2106.99380920016	2	MULTI	HCD	FTMS	0	0	0	-1	0	0	0	0	6				NaN	1	NaN	NaN	NaN	NaN	417	0	1	2410	2823
20140904-PurClathDigest-1ug-01	2830	31.383	29.278	1381700	0	NaN	204650	0.37	-	-1		0	66	307.708557117558	613.402561301915	2	MULTI	HCD	FTMS	0	0	0	-1	0	0	0	0	7				NaN	1	NaN	NaN	NaN	NaN	418	0	1	2410	2823
20140904-PurClathDigest-1ug-01	2832	31.394	10.031	3783500	0	NaN	965060	0.4	-	-1		0	102	562.250823478989	1122.48709402478	2	MULTI	HCD	FTMS	0	0	0	-1	0	0	0	0	1				NaN	1	NaN	NaN	NaN	NaN	419	0	1	2411	2831
20140904-PurClathDigest-1ug-01	2833	31.398	11.766	2639400	0	NaN	238420	0.36	-	-1		0	114	523.754824586157	2090.99019247823	4	MULTI	HCD	FTMS	0	0	0	-1	0	0	0	0	2				NaN	1	NaN	NaN	NaN	NaN	420	0	1	2411	2831
20140904-PurClathDigest-1ug-01	2834	31.401	26.407	2417600	0	NaN	280680	0.38	-	-1		0	135	725.81979460612	1449.62503627904	2	MULTI	HCD	FTMS	0	0	0	-1	0	0	0	0	3				NaN	1	NaN	NaN	NaN	NaN	421	0	1	2411	2831
20140904-PurClathDigest-1ug-01	2835	31.404	15.177	2485400	0	NaN	134000	0.36	-	-1		0	142	565.509416053453	2258.00855834741	4	MULTI	HCD	FTMS	0	0	0	-1	0	0	0	0	4				NaN	1	NaN	NaN	NaN	NaN	422	0	1	2411	2831
20140904-PurClathDigest-1ug-01	2836	31.407	20.573	547610	0	NaN	43673	0.37	-	-1		0	95	700.347792269166	2797.36206321027	4	MULTI	HCD	FTMS	0	0	0	-1	0	0	0	0	5				NaN	1	NaN	NaN	NaN	NaN	423	0	1	2411	2831
20140904-PurClathDigest-1ug-01	2837	31.41	41.237	1393900	0	NaN	224780	0.39	+	2176	KQEALVAR	8	101	457.774264492377	913.533976051554	2	MULTI	HCD	FTMS	0	0	0	-1	0	0	0	0	6	Unmodified	_KQEALVAR_	E1BFB0	136.780502319336	1	NaN	NaN	NaN	NaN	424	0	1	2411	2831
20140904-PurClathDigest-1ug-01	2838	31.413	31.848	1161200	0	NaN	74186	0.38	-	-1		0	152	753.676462268282	2258.00755740504	3	MULTI	HCD	FTMS	0	0	0	-1	0	0	0	0	7				NaN	1	NaN	NaN	NaN	NaN	425	0	1	2411	2831
20140904-PurClathDigest-1ug-01	2840	31.425	6.055	7820700	0	NaN	808930	0.39	-	-1		0	128	484.215772743531	1449.62548883079	3	MULTI	HCD	FTMS	0	0	0	-1	0	0	0	0	1				NaN	1	NaN	NaN	NaN	NaN	426	0	1	2412	2839
20140904-PurClathDigest-1ug-01	2841	31.428	11.413	1863200	0	NaN	258770	0.36	+	1343	GSPSTVSSSYKR	12	83	419.213987688756	1254.62013366647	3	MULTI	HCD	FTMS	0	0	0	-1	0	0	0	0	2	Unmodified	_GSPSTVSSSYKR_	F1MDZ2;O77788	105.014503479004	1	NaN	NaN	NaN	NaN	427	0	1	2412	2839
20140904-PurClathDigest-1ug-01	2842	31.431	18.541	5377800	0	NaN	1162400	0.36	+	3679	RYVETPR	7	103	460.751008863636	919.487464794072	2	MULTI	HCD	FTMS	0	0	0	-1	0	0	0	0	3	Unmodified	_RYVETPR_	P02548	199.985702514648	1	NaN	NaN	NaN	NaN	428	0	1	2412	2839
20140904-PurClathDigest-1ug-01	2843	31.434	19.191	4421800	0	NaN	342560	0.37	+	821	EKEPETESKPGEDLK	15	156	572.615829205627	1714.82565821708	3	MULTI	HCD	FTMS	0	0	0	-1	0	0	0	0	4	Unmodified	_EKEPETESKPGEDLK_	F1MEW3	105.748497009277	1	NaN	NaN	NaN	NaN	429	0	1	2412	2839
20140904-PurClathDigest-1ug-01	2844	31.437	32.59	5652900	0	NaN	1283300	0.38	+	2222	KVFGDGSR	8	101	433.229791687368	864.445030441535	2	MULTI	HCD	FTMS	0	0	0	-1	0	0	0	0	5	Unmodified	_KVFGDGSR_	Q08DH7	151.076995849609	1	NaN	NaN	NaN	NaN	430	0	1	2412	2839
20140904-PurClathDigest-1ug-01	2845	31.441	33.453	105900	0	NaN	26169	0.38	-	-1		0	28	375.170070391771	1122.48838177551	3	MULTI	HCD	FTMS	0	0	0	-1	0	0	0	0	6				NaN	1	NaN	NaN	NaN	NaN	431	0	1	2412	2839
20140904-PurClathDigest-1ug-01	2846	31.444	42.585	798100	0	NaN	146930	0.39	+	884	ELSSEPR	7	75	409.206275277721	816.397997622242	2	MULTI	HCD	FTMS	0	0	0	-1	0	0	0	0	7	Unmodified	_ELSSEPR_	F1N3M8;G3MYP5	82.1774063110352	1	NaN	NaN	NaN	NaN	432	0	1	2412	2839
20140904-PurClathDigest-1ug-01	2848	31.456	12.52	2109600	0	NaN	199350	0.4	+	823	EKEPETESKPGEDLK	15	104	858.420200236857	1714.82584754051	2	MULTI	HCD	FTMS	0	0	0	-1	0	0	0	0	1	Unmodified	_EKEPETESKPGEDLK_	F1MEW3	123.804397583008	1	NaN	NaN	NaN	NaN	433	0	1	2413	2847
20140904-PurClathDigest-1ug-01	2849	31.459	8.784	13138000	0	NaN	1363400	0.35	+	426	ASREEIHEYR	10	114	430.545926749187	1288.61595084776	3	MULTI	HCD	FTMS	0	0	0	-1	0	0	0	0	2	Unmodified	_ASREEIHEYR_	Q08DH7	154.528503417969	1	NaN	NaN	NaN	NaN	434	0	1	2413	2847
20140904-PurClathDigest-1ug-01	2850	31.462	26.91	2271200	0	NaN	252080	0.37	+	4034	STMQELNSR	9	111	541.250965885499	1080.4873788378	2	MULTI	HCD	FTMS	0	0	0	-1	0	0	0	0	3	Oxidation (M)	_STM(ox)QELNSR_	CON__P35527	145.976196289063	1	NaN	NaN	NaN	NaN	435	0	1	2413	2847
20140904-PurClathDigest-1ug-01	2851	31.465	29.42	1024500	0	NaN	229570	0.37	-	-1		0	102	604.827586066323	1207.64061919945	2	MULTI	HCD	FTMS	0	0	0	-1	0	0	0	0	4				NaN	1	NaN	NaN	NaN	NaN	436	0	1	2413	2847
20140904-PurClathDigest-1ug-01	2852	31.469	31.338	726340	0	NaN	75575	0.38	+	84	AGDSHASEEPEQTEPEQR	18	90	998.927520545485	1995.84048815777	2	MULTI	HCD	FTMS	0	0	0	-1	0	0	0	0	5	Unmodified	_AGDSHASEEPEQTEPEQR_	G3MYP5	220.074798583984	1	NaN	NaN	NaN	NaN	437	0	1	2413	2847
20140904-PurClathDigest-1ug-01	2853	31.472	19.556	558000	0	NaN	65982	0.37	+	85	AGDSHASEEPEQTEPEQR	18	77	666.287492699088	1995.84064869746	3	MULTI	HCD	FTMS	0	0	0	-1	0	0	0	0	6	Unmodified	_AGDSHASEEPEQTEPEQR_	G3MYP5	126.604400634766	1	NaN	NaN	NaN	NaN	438	0	1	2413	2847
20140904-PurClathDigest-1ug-01	2854	31.475	41.246	430250	0	NaN	116060	0.39	-	-1		0	44	587.746144531755	1173.47773613031	2	MULTI	HCD	FTMS	0	0	0	-1	0	0	0	0	7				NaN	1	NaN	NaN	NaN	NaN	439	0	1	2413	2847
20140904-PurClathDigest-1ug-01	2856	31.487	29.661	1235600	0	NaN	134580	0.39	-	-1		0	141	783.351515606945	1564.68847828069	2	MULTI	HCD	FTMS	0	0	0	-1	0	0	0	0	1				NaN	1	NaN	NaN	NaN	NaN	440	0	1	2414	2855
20140904-PurClathDigest-1ug-01	2857	31.491	25.689	2678100	0	NaN	564280	0.37	+	427	ASREEIHEYR	10	109	645.315016615156	1288.61548029711	2	MULTI	HCD	FTMS	0	0	0	-1	0	0	0	0	2	Unmodified	_ASREEIHEYR_	Q08DH7	172.656799316406	1	NaN	NaN	NaN	NaN	441	0	1	2414	2855
20140904-PurClathDigest-1ug-01	2858	31.494	15.487	3165600	0	NaN	329180	0.36	-	-1		0	124	509.480574817216	2033.89319340247	4	MULTI	HCD	FTMS	0	0	0	-1	0	0	0	0	3				NaN	1	NaN	NaN	NaN	NaN	442	0	1	2414	2855
20140904-PurClathDigest-1ug-01	2859	31.497	21.213	6095700	0	NaN	937730	0.37	+	2895	LRSEIDNVKK	10	132	401.234712020502	1200.68230666171	3	MULTI	HCD	FTMS	0	0	0	-1	0	0	0	0	4	Unmodified	_LRSEIDNVKK_	M0QVZ6;CON__Q922U2;Q5XQN5;A5D7M6;CON__P04264;CON__Q5XQN5	144.920104980469	1	NaN	NaN	NaN	NaN	443	0	1	2414	2855
20140904-PurClathDigest-1ug-01	2860	31.5	27.743	1064300	0	NaN	185640	0.37	-	-1		0	118	678.971612414531	2033.89300784379	3	MULTI	HCD	FTMS	0	0	0	-1	0	0	0	0	5				NaN	1	NaN	NaN	NaN	NaN	444	0	1	2414	2855
20140904-PurClathDigest-1ug-01	2861	31.503	42.319	1465500	0	NaN	300040	0.39	-	-1		0	121	568.806678519803	1135.59880410641	2	MULTI	HCD	FTMS	0	0	0	-1	0	0	0	0	6				NaN	1	NaN	NaN	NaN	NaN	445	0	1	2414	2855
20140904-PurClathDigest-1ug-01	2862	31.507	23.068	1982700	0	NaN	541910	0.37	-	-1		0	116	452.608855081602	2258.00789307501	5	MULTI	HCD	FTMS	0	0	0	-1	0	0	0	0	7				NaN	1	NaN	NaN	NaN	NaN	446	0	1	2414	2855
20140904-PurClathDigest-1ug-01	2864	31.518	6.75	24940000	0	NaN	5941800	0.39	+	4953	WREEQTER	8	137	567.270228028559	1132.52590312392	2	MULTI	HCD	FTMS	0	0	0	-1	0	0	0	0	1	Unmodified	_WREEQTER_	P04973	178.786193847656	1	NaN	NaN	NaN	NaN	447	0	1	2415	2863
20140904-PurClathDigest-1ug-01	2865	31.521	12.854	6396900	0	NaN	633710	0.36	+	2313	KYEDEINKR	9	106	398.875288649619	1193.60403654906	3	MULTI	HCD	FTMS	0	0	0	-1	0	0	0	0	2	Unmodified	_KYEDEINKR_	G3MXL3;G3N0V2;CON__P12035;CON__P35908;CON__ENSEMBL:ENSBTAP00000038253;CON__Q01546;CON__Q3TTY5	173.809097290039	1	NaN	NaN	NaN	NaN	448	0	1	2415	2863
20140904-PurClathDigest-1ug-01	2866	31.524	20.803	2097700	0	NaN	267370	0.37	+	2896	LRSEIDNVKK	10	96	601.348419479377	1200.68228602555	2	MULTI	HCD	FTMS	0	0	0	-1	0	0	0	0	3	Unmodified	_LRSEIDNVKK_	M0QVZ6;CON__Q922U2;Q5XQN5;A5D7M6;CON__P04264;CON__Q5XQN5	120.126899719238	1	NaN	NaN	NaN	NaN	449	0	1	2415	2863
20140904-PurClathDigest-1ug-01	2867	31.527	14.257	1426400	0	NaN	99555	0.36	-	-1		0	104	522.570902853264	1564.69087915999	3	MULTI	HCD	FTMS	0	0	0	-1	0	0	0	0	4				NaN	1	NaN	NaN	NaN	NaN	450	0	1	2415	2863
20140904-PurClathDigest-1ug-01	2868	31.53	32.16	1434700	0	NaN	251090	0.38	+	2314	KYEDEINKR	9	92	597.809213978322	1193.60387502344	2	MULTI	HCD	FTMS	0	0	0	-1	0	0	0	0	5	Unmodified	_KYEDEINKR_	G3MXL3;G3N0V2;CON__P12035;CON__P35908;CON__ENSEMBL:ENSBTAP00000038253;CON__Q01546;CON__Q3TTY5	213.181198120117	1	NaN	NaN	NaN	NaN	451	0	1	2415	2863
20140904-PurClathDigest-1ug-01	2869	31.534	45.73	532400	0	NaN	53630	0.39	+	3197	NMNKDDEEEITK	12	122	741.325475753412	1480.63639857362	2	MULTI	HCD	FTMS	0	0	0	-1	0	0	0	0	6	Oxidation (M)	_NM(ox)NKDDEEEITK_	F1MRZ5;F1MRZ6	116.172996520996	1	NaN	NaN	NaN	NaN	452	0	1	2415	2863
20140904-PurClathDigest-1ug-01	2870	31.537	40.164	4232900	0	NaN	969990	0.38	+	2829	LPDASR	6	84	329.679645341429	657.344737749657	2	MULTI	HCD	FTMS	0	0	0	-1	0	0	0	0	7	Unmodified	_LPDASR_	F1N3M8;G3MYP5	135.106399536133	1	NaN	NaN	NaN	NaN	453	0	1	2415	2863
20140904-PurClathDigest-1ug-01	2872	31.549	12.065	4917500	0	NaN	602610	0.4	-	-1		0	92	482.226133589577	962.437714245954	2	MULTI	HCD	FTMS	0	0	0	-1	0	0	0	0	1				NaN	1	NaN	NaN	NaN	NaN	454	0	1	2416	2871
20140904-PurClathDigest-1ug-01	2873	31.553	20.004	2174600	0	NaN	959350	0.34	-	-1		0	50	437.214219001027	NaN	0	PEAK	HCD	FTMS	0	0	0	-1	0	0	0	0	2				NaN	1	NaN	NaN	NaN	NaN	455	0	1	2416	2871
20140904-PurClathDigest-1ug-01	2874	31.556	12.423	4835300	0	NaN	839090	0.36	-	-1		0	119	372.840457465901	1115.4995429979	3	MULTI	HCD	FTMS	0	0	0	-1	0	0	0	0	3				NaN	1	NaN	NaN	NaN	NaN	456	0	1	2416	2871
20140904-PurClathDigest-1ug-01	2875	31.559	22.41	511820	0	NaN	68759	0.37	-	-1		0	69	474.230639479712	946.446726026223	2	MULTI	HCD	FTMS	0	0	0	-1	0	0	0	0	4				NaN	1	NaN	NaN	NaN	NaN	457	0	1	2416	2871
20140904-PurClathDigest-1ug-01	2876	31.562	25.566	3375100	0	NaN	522680	0.36	-	-1		0	76	348.705739830658	695.396926728115	2	MULTI	HCD	FTMS	0	0	0	-1	0	0	0	0	5				NaN	1	NaN	NaN	NaN	NaN	458	0	1	2416	2871
20140904-PurClathDigest-1ug-01	2877	31.565	37.779	2707400	0	NaN	180540	0.38	-	-1		0	169	698.003128816734	2090.9875570504	3	MULTI	HCD	FTMS	0	0	0	-1	0	0	0	0	6				NaN	1	NaN	NaN	NaN	NaN	459	0	1	2416	2871
20140904-PurClathDigest-1ug-01	2878	31.569	42.333	436510	0	NaN	74269	0.38	-	-1		0	79	351.69247691499	701.37040089678	2	MULTI	HCD	FTMS	0	0	0	-1	0	0	0	0	7				NaN	1	NaN	NaN	NaN	NaN	460	0	1	2416	2871
20140904-PurClathDigest-1ug-01	2880	31.58	0.538	159020000	0	NaN	19719000	0.39	+	4955	WREEQTER	8	121	378.515766383301	1132.5254697501	3	MULTI	HCD	FTMS	0	0	0	-1	0	0	0	0	1	Unmodified	_WREEQTER_	P04973	155.089706420898	1	NaN	NaN	NaN	NaN	461	0	1	2417	2879
20140904-PurClathDigest-1ug-01	2881	31.584	4.338	31056000	0	NaN	2395000	0.36	+	2161	KQEAEWK	7	127	459.737535610785	917.46051828837	2	MULTI	HCD	FTMS	0	0	0	-1	0	0	0	0	2	Unmodified	_KQEAEWK_	P04973	143.214401245117	1	NaN	NaN	NaN	NaN	462	0	1	2417	2879
20140904-PurClathDigest-1ug-01	2882	31.587	20.279	3974400	0	NaN	325830	0.35	-	-1		0	89	349.662776267315	697.31099960143	2	MULTI	HCD	FTMS	0	0	0	-1	0	0	0	0	3				NaN	1	NaN	NaN	NaN	NaN	463	0	1	2417	2879
20140904-PurClathDigest-1ug-01	2883	31.59	30.536	980290	0	NaN	111910	0.37	-	-1		0	95	501.733863761054	1001.45317458891	2	MULTI	HCD	FTMS	0	0	0	-1	0	0	0	0	4				NaN	1	NaN	NaN	NaN	NaN	464	0	1	2417	2879
20140904-PurClathDigest-1ug-01	2884	31.593	20.581	2412400	0	NaN	731880	0.37	-	-1		0	140	527.755161512785	2106.99154018474	4	MULTI	HCD	FTMS	0	0	0	-1	0	0	0	0	5				NaN	1	NaN	NaN	NaN	NaN	465	0	1	2417	2879
20140904-PurClathDigest-1ug-01	2885	31.596	53.594	1215400	0	NaN	143670	0.4	-	-1		0	98	505.224601660658	1008.43465038812	2	MULTI	HCD	FTMS	0	0	0	-1	0	0	0	0	6				NaN	1	NaN	NaN	NaN	NaN	466	0	1	2417	2879
20140904-PurClathDigest-1ug-01	2886	31.6	24.809	1032300	0	NaN	70155	0.37	-	-1		0	115	422.405771364386	2106.99247448893	5	MULTI	HCD	FTMS	0	0	0	-1	0	0	0	0	7				NaN	1	NaN	NaN	NaN	NaN	467	0	1	2417	2879
20140904-PurClathDigest-1ug-01	2888	31.611	26.815	60061	0	NaN	7482.7	0.42	-	-1		0	32	1026.00135151389	2049.98815009458	2	MULTI	HCD	FTMS	0	0	0	-1	0	0	0	0	1				NaN	1	NaN	NaN	NaN	NaN	468	0	1	2418	2887
20140904-PurClathDigest-1ug-01	2889	31.615	25.254	2404100	0	NaN	271220	0.36	-	-1		0	93	333.694709116879	665.374865300558	2	MULTI	HCD	FTMS	0	0	0	-1	0	0	0	0	2				NaN	1	NaN	NaN	NaN	NaN	469	0	1	2418	2887
20140904-PurClathDigest-1ug-01	2890	31.618	20.761	916460	0	NaN	146540	0.36	-	-1		0	78	429.713993578115	1714.82686844606	4	MULTI	HCD	FTMS	0	0	0	-1	0	0	0	0	3				NaN	1	NaN	NaN	NaN	NaN	470	0	1	2418	2887
20140904-PurClathDigest-1ug-01	2891	31.621	42.333	1177100	0	NaN	95559	0.39	-	-1		0	114	451.22486011979	900.43516730638	2	MULTI	HCD	FTMS	0	0	0	-1	0	0	0	0	4				NaN	1	NaN	NaN	NaN	NaN	471	0	1	2418	2887
20140904-PurClathDigest-1ug-01	2892	31.625	59.156	655990	0	NaN	75903	0.41	+	1379	HALDANQGTATGPR	14	100	704.85002083594	1407.68548873868	2	MULTI	HCD	FTMS	0	0	0	-1	0	0	0	0	5	Unmodified	_HALDANQGTATGPR_	P22439	159.682693481445	1	NaN	NaN	NaN	NaN	472	0	1	2418	2887
20140904-PurClathDigest-1ug-01	2893	31.628	26.286	933930	0	NaN	67146	0.37	-	-1		0	119	560.479749579509	2797.36236556455	5	MULTI	HCD	FTMS	0	0	0	-1	0	0	0	0	6				NaN	1	NaN	NaN	NaN	NaN	473	0	1	2418	2887
20140904-PurClathDigest-1ug-01	2894	31.632	63.977	205190	0	NaN	27009	0.41	-	-1		0	68	493.219642089906	984.424731246612	2	MULTI	HCD	FTMS	0	0	0	-1	0	0	0	0	7				NaN	1	NaN	NaN	NaN	NaN	474	0	1	2418	2887
20140904-PurClathDigest-1ug-01	2896	31.643	2.628	6930500	0	NaN	725640	0.4	+	2163	KQEAEWK	7	68	306.827626551086	917.461050253459	3	MULTI	HCD	FTMS	0	0	0	-1	0	0	0	0	1	Unmodified	_KQEAEWK_	P04973	96.1667404174805	1	NaN	NaN	NaN	NaN	475	0	1	2419	2895
20140904-PurClathDigest-1ug-01	2897	31.647	4.958	14050000	0	NaN	3453100	0.35	+	2094	KGADEAALAR	10	95	501.27235837887	1000.53016382454	2	MULTI	HCD	FTMS	0	0	0	-1	0	0	0	0	2	Unmodified	_KGADEAALAR_	P02548	201.311294555664	1	NaN	NaN	NaN	NaN	476	0	1	2419	2895
20140904-PurClathDigest-1ug-01	2898	31.65	12.241	2096500	0	NaN	334390	0.36	-	-1		0	86	483.749697117793	965.484841302386	2	MULTI	HCD	FTMS	0	0	0	-1	0	0	0	0	3				NaN	1	NaN	NaN	NaN	NaN	477	0	1	2419	2895
20140904-PurClathDigest-1ug-01	2899	31.653	19.306	7366300	0	NaN	552880	0.36	+	1455	HLQEALK	7	92	419.742762702382	837.470972471564	2	MULTI	HCD	FTMS	0	0	0	-1	0	0	0	0	4	Unmodified	_HLQEALK_	F1N3M8;G3MYP5	134.982696533203	1	NaN	NaN	NaN	NaN	478	0	1	2419	2895
20140904-PurClathDigest-1ug-01	2900	31.656	22.4	2472900	0	NaN	443390	0.37	+	3692	SAASLNSR	8	83	403.703824684808	NaN	0	PEAK	HCD	FTMS	0	0	0	-1	0	0	0	0	5	Deamidation (NQ)	_SAASLN(de)SR_	P00760	122.397499084473	1	NaN	NaN	NaN	NaN	479	0	1	2419	2895
20140904-PurClathDigest-1ug-01	2901	31.659	25.72	3493100	0	NaN	147270	0.37	+	446	ATLEMVNHEK	10	136	594.288832009279	1186.56311108536	2	MULTI	HCD	FTMS	0	0	0	-1	0	0	0	0	6	Oxidation (M)	_ATLEM(ox)VNHEK_	F1MDZ2;O77788	113.510696411133	1	NaN	NaN	NaN	NaN	480	0	1	2419	2895
20140904-PurClathDigest-1ug-01	2902	31.662	16.632	597240	0	NaN	50173	0.36	-	-1		0	70	618.959403201567	1853.8563802049	3	MULTI	HCD	FTMS	0	0	0	-1	0	0	0	0	7				NaN	1	NaN	NaN	NaN	NaN	481	0	1	2419	2895
20140904-PurClathDigest-1ug-01	2904	31.673	6.864	4059200	0	NaN	346800	0.41	+	447	ATLEMVNHEK	10	94	396.529332544419	1186.56616823346	3	MULTI	HCD	FTMS	0	0	0	-1	0	0	0	0	1	Oxidation (M)	_ATLEM(ox)VNHEK_	F1MDZ2;O77788	102.355796813965	1	NaN	NaN	NaN	NaN	482	0	1	2420	2903
20140904-PurClathDigest-1ug-01	2905	31.677	9.201	2858600	0	NaN	399480	0.35	-	-1		0	116	610.31432594765	1827.92114844315	3	MULTI	HCD	FTMS	0	0	0	-1	0	0	0	0	2				NaN	1	NaN	NaN	NaN	NaN	483	0	1	2420	2903
20140904-PurClathDigest-1ug-01	2906	31.68	14.132	5666200	0	NaN	692130	0.36	+	1358	GTNESLER	8	110	453.220268348417	904.425983763634	2	MULTI	HCD	FTMS	0	0	0	-1	0	0	0	0	3	Unmodified	_GTNESLER_	P48616;Q28115	132.784896850586	1	NaN	NaN	NaN	NaN	484	0	1	2420	2903
20140904-PurClathDigest-1ug-01	2907	31.683	10.927	3284300	0	NaN	505930	0.36	+	822	EKEPETESKPGEDLK	15	110	572.615829205627	1714.82565821708	3	MULTI	HCD	FTMS	0	0	0	-1	0	0	0	0	4	Unmodified	_EKEPETESKPGEDLK_	F1MEW3	47.8110389709473	1	NaN	NaN	NaN	NaN	485	0	1	2420	2903
20140904-PurClathDigest-1ug-01	2908	31.686	12.73	541950	0	NaN	60935	0.36	-	-1		0	54	334.517642406982	1000.53109782115	3	MULTI	HCD	FTMS	0	0	0	-1	0	0	0	0	5				NaN	1	NaN	NaN	NaN	NaN	486	0	1	2420	2903
20140904-PurClathDigest-1ug-01	2909	31.689	17.717	3962400	0	NaN	362430	0.36	+	3958	SPVEEVKPK	9	91	506.787145885247	1011.55973883729	2	MULTI	HCD	FTMS	0	0	0	-1	0	0	0	0	6	Unmodified	_SPVEEVKPK_	F1MDZ2;O77788	128.815399169922	1	NaN	NaN	NaN	NaN	487	0	1	2420	2903
20140904-PurClathDigest-1ug-01	2910	31.692	12.387	2135200	0	NaN	151120	0.36	-	-1		0	113	555.039459569024	2216.1287324097	4	MULTI	HCD	FTMS	0	0	0	-1	0	0	0	0	7				NaN	1	NaN	NaN	NaN	NaN	488	0	1	2420	2903
20140904-PurClathDigest-1ug-01	2912	31.703	6.309	4314700	0	NaN	1237600	0.39	-	-1		0	53	301.168936880884	600.323320828567	2	MULTI	HCD	FTMS	0	0	0	-1	0	0	0	0	1				NaN	1	NaN	NaN	NaN	NaN	489	0	1	2421	2911
20140904-PurClathDigest-1ug-01	2913	31.706	22.148	2401100	0	NaN	229900	0.36	+	3959	SPVEEVKPK	9	82	338.194258332453	1011.56094559756	3	MULTI	HCD	FTMS	0	0	0	-1	0	0	0	0	2	Unmodified	_SPVEEVKPK_	F1MDZ2;O77788	98.1106872558594	1	NaN	NaN	NaN	NaN	490	0	1	2421	2911
20140904-PurClathDigest-1ug-01	2914	31.709	38.516	472030	0	NaN	50179	0.39	+	824	EKEPETESKPGEDLK	15	84	858.420200236857	1714.82584754051	2	MULTI	HCD	FTMS	0	0	0	-1	0	0	0	0	3	Unmodified	_EKEPETESKPGEDLK_	F1MEW3	113.326103210449	1	NaN	NaN	NaN	NaN	491	0	1	2421	2911
20140904-PurClathDigest-1ug-01	2915	31.713	32.827	1301200	0	NaN	137910	0.37	-	-1		0	90	342.687850304119	683.361147675038	2	MULTI	HCD	FTMS	0	0	0	-1	0	0	0	0	4				NaN	1	NaN	NaN	NaN	NaN	492	0	1	2421	2911
20140904-PurClathDigest-1ug-01	2916	31.716	37.416	43744	0	NaN	4129.1	0.38	-	-1		0	33	927.935053284396	1853.85555363559	2	MULTI	HCD	FTMS	0	0	0	-1	0	0	0	0	5				NaN	1	NaN	NaN	NaN	NaN	493	0	1	2421	2911
20140904-PurClathDigest-1ug-01	2917	31.72	44.951	413810	0	NaN	45378	0.39	-	-1		0	107	914.967642825769	NaN	0	PEAK	HCD	FTMS	0	0	0	-1	0	0	0	0	6				NaN	1	NaN	NaN	NaN	NaN	494	0	1	2421	2911
20140904-PurClathDigest-1ug-01	2918	31.723	45.35	2628500	0	NaN	150320	0.39	+	97	AGEPQDQAVEQK	12	141	650.312375672729	1298.61019841226	2	MULTI	HCD	FTMS	0	0	0	-1	0	0	0	0	7	Unmodified	_AGEPQDQAVEQK_	F1N3M8;G3MYP5	132.804702758789	1	NaN	NaN	NaN	NaN	495	0	1	2421	2911
20140904-PurClathDigest-1ug-01	2920	31.735	16.268	3304900	0	NaN	209590	0.4	+	2177	KQLLEK	6	91	379.741646933226	757.468740933251	2	MULTI	HCD	FTMS	0	0	0	-1	0	0	0	0	1	Unmodified	_KQLLEK_	P49951;F1MPU0	130.898406982422	1	NaN	NaN	NaN	NaN	496	0	1	2422	2919
20140904-PurClathDigest-1ug-01	2921	31.739	26.911	7815500	0	NaN	1037700	0.37	-	-1		0	111	399.201973123798	796.389393314396	2	MULTI	HCD	FTMS	0	0	0	-1	0	0	0	0	2				NaN	1	NaN	NaN	NaN	NaN	497	0	1	2422	2919
20140904-PurClathDigest-1ug-01	2922	31.742	32.555	382380	0	NaN	38110	0.38	-	-1		0	89	791.350677079394	1580.68680122559	2	MULTI	HCD	FTMS	0	0	0	-1	0	0	0	0	3				NaN	1	NaN	NaN	NaN	NaN	498	0	1	2422	2919
20140904-PurClathDigest-1ug-01	2923	31.745	34.167	173850	0	NaN	43750	0.38	-	-1		0	47	558.771193261058	1115.52783358892	2	MULTI	HCD	FTMS	0	0	0	-1	0	0	0	0	4				NaN	1	NaN	NaN	NaN	NaN	499	0	1	2422	2919
20140904-PurClathDigest-1ug-01	2924	31.748	24.478	977040	0	NaN	90389	0.37	-	-1		0	102	578.601587920734	1732.7829343624	3	MULTI	HCD	FTMS	0	0	0	-1	0	0	0	0	5				NaN	1	NaN	NaN	NaN	NaN	500	0	1	2422	2919
20140904-PurClathDigest-1ug-01	2925	31.752	30.851	827230	0	NaN	82693	0.37	-	-1		0	118	521.249993382674	520.242716916074	1	MULTI	HCD	FTMS	0	0	0	-1	0	0	0	0	6				NaN	1	NaN	NaN	NaN	NaN	501	0	1	2422	2919
20140904-PurClathDigest-1ug-01	2926	31.755	34.907	2253800	0	NaN	234130	0.38	+	280	ALEQEDKVPEGKDK	14	147	529.273625639186	1584.79904751776	3	MULTI	HCD	FTMS	0	0	0	-1	0	0	0	0	7	Unmodified	_ALEQEDKVPEGKDK_	G3MYP5	122.666603088379	1	NaN	NaN	NaN	NaN	502	0	1	2422	2919
20140904-PurClathDigest-1ug-01	2928	31.766	14.186	3681600	0	NaN	1016100	0.4	+	4954	WREEQTER	8	106	567.270228028559	1132.52590312392	2	MULTI	HCD	FTMS	0	0	0	-1	0	0	0	0	1	Unmodified	_WREEQTER_	P04973	159.252105712891	1	NaN	NaN	NaN	NaN	503	0	1	2423	2927
20140904-PurClathDigest-1ug-01	2929	31.77	14.029	5847800	0	NaN	767890	0.36	+	1183	GANESLER	8	104	438.213401850525	874.41225076785	2	MULTI	HCD	FTMS	0	0	0	-1	0	0	0	0	2	Unmodified	_GANESLER_	Q08DH7	133.870300292969	1	NaN	NaN	NaN	NaN	504	0	1	2423	2927
20140904-PurClathDigest-1ug-01	2930	31.773	16.74	5379200	0	NaN	840670	0.36	+	1235	GHYTIGK	7	89	388.208703998442	774.402855063684	2	MULTI	HCD	FTMS	0	0	0	-1	0	0	0	0	3	Unmodified	_GHYTIGK_	F6RP72;Q2HJ86;Q32KN8;P81948;Q3ZCJ7;F1MNF8;F2Z4C1;F2Z4K0;P81947	150.558502197266	1	NaN	NaN	NaN	NaN	505	0	1	2423	2927
20140904-PurClathDigest-1ug-01	2931	31.776	49.554	562770	0	NaN	80466	0.39	+	281	ALEQEDKVPEGKDK	14	113	793.407548541743	1584.80054415029	2	MULTI	HCD	FTMS	0	0	0	-1	0	0	0	0	4	Unmodified	_ALEQEDKVPEGKDK_	G3MYP5	130.195999145508	1	NaN	NaN	NaN	NaN	506	0	1	2423	2927
20140904-PurClathDigest-1ug-01	2932	31.78	79.259	700370	0	NaN	63054	0.43	+	2324	LAAEDATNEK	10	106	531.751164821064	1061.48777670893	2	MULTI	HCD	FTMS	0	0	0	-1	0	0	0	0	5	Deamidation (NQ)	_LAAEDATN(de)EK_	P02548	102.657203674316	1	NaN	NaN	NaN	NaN	507	0	1	2423	2927
20140904-PurClathDigest-1ug-01	2933	31.784	33.842	1261500	0	NaN	48291	0.38	-	-1		0	148	422.602552641157	2107.97638087278	5	MULTI	HCD	FTMS	0	0	0	-1	0	0	0	0	6				NaN	1	NaN	NaN	NaN	NaN	508	0	1	2423	2927
20140904-PurClathDigest-1ug-01	2934	31.787	47.703	139160	0	NaN	9402.7	0.4	-	-1		0	76	762.337724981933	2283.991345546	3	MULTI	HCD	FTMS	0	0	0	-1	0	0	0	0	7				NaN	1	NaN	NaN	NaN	NaN	509	0	1	2423	2927
20140904-PurClathDigest-1ug-01	2936	31.799	12.589	4776500	0	NaN	519020	0.39	-	-1		0	92	491.747083316122	981.479613699045	2	MULTI	HCD	FTMS	0	0	0	-1	0	0	0	0	1				NaN	1	NaN	NaN	NaN	NaN	510	0	1	2424	2935
20140904-PurClathDigest-1ug-01	2937	31.802	13.957	3390000	0	NaN	369640	0.36	+	4825	VTMQNLNDR	9	104	553.766197544957	1105.51784215671	2	MULTI	HCD	FTMS	0	0	0	-1	0	0	0	0	2	Oxidation (M)	_VTM(ox)QNLNDR_	CON__A2A4G1;CON__P02533;CON__Q3ZAW8;CON__Q7Z3Y8;CON__Q9Z2K1;Q0P5J4;CON__P08779;CON__Q7Z3Y7;CON__Q7Z3Z0;F1MC11;CON__P02535-1;CON__P13645;CON__Q148H6;CON__Q7Z3Y9;Q0P5J6;Q148H6	136.366195678711	1	NaN	NaN	NaN	NaN	511	0	1	2424	2935
20140904-PurClathDigest-1ug-01	2938	31.805	16.442	3196400	0	NaN	292930	0.36	-	-1		0	138	583.945496385597	1748.81465975699	3	MULTI	HCD	FTMS	0	0	0	-1	0	0	0	0	3				NaN	1	NaN	NaN	NaN	NaN	512	0	1	2424	2935
20140904-PurClathDigest-1ug-01	2939	31.808	33.264	1500100	0	NaN	95108	0.38	-	-1		0	132	615.65785473263	1843.95173479809	3	MULTI	HCD	FTMS	0	0	0	-1	0	0	0	0	4				NaN	1	NaN	NaN	NaN	NaN	513	0	1	2424	2935
20140904-PurClathDigest-1ug-01	2940	31.812	52.677	1111800	0	NaN	54527	0.4	-	-1		0	142	461.99509129802	1843.95125932568	4	MULTI	HCD	FTMS	0	0	0	-1	0	0	0	0	5				NaN	1	NaN	NaN	NaN	NaN	514	0	1	2424	2935
20140904-PurClathDigest-1ug-01	2941	31.815	94.36	965990	0	NaN	63141	0.44	+	1894	KDEVLEEK	8	132	495.260816828793	988.507080724386	2	MULTI	HCD	FTMS	0	0	0	-1	0	0	0	0	6	Unmodified	_KDEVLEEK_	F1N3M8;G3MYP5	181.72380065918	1	NaN	NaN	NaN	NaN	515	0	1	2424	2935
20140904-PurClathDigest-1ug-01	2942	31.82	81.096	1042300	0	NaN	165690	0.41	-	-1		0	91	348.705688524752	695.396824116304	2	MULTI	HCD	FTMS	0	0	0	-1	0	0	0	0	7				NaN	1	NaN	NaN	NaN	NaN	516	0	1	2424	2935
20140904-PurClathDigest-1ug-01	2944	31.832	0.729	100700000	0	NaN	25736000	0.38	+	4278	TPDTIR	6	63	351.69247691499	701.37040089678	2	MULTI	HCD	FTMS	0	0	0	-1	0	0	0	0	1	Unmodified	_TPDTIR_	P49951;F1MPU0	148.350402832031	1	NaN	NaN	NaN	NaN	517	0	1	2425	2943
20140904-PurClathDigest-1ug-01	2945	31.835	9.427	2688100	0	NaN	131580	0.35	-	-1		0	117	526.279790138598	2101.09005468799	4	MULTI	HCD	FTMS	0	0	0	-1	0	0	0	0	2				NaN	1	NaN	NaN	NaN	NaN	518	0	1	2425	2943
20140904-PurClathDigest-1ug-01	2946	31.838	27.134	2136300	0	NaN	172380	0.37	+	2162	KQEAEWK	7	109	459.737535610785	917.46051828837	2	MULTI	HCD	FTMS	0	0	0	-1	0	0	0	0	3	Unmodified	_KQEAEWK_	P04973	129.14289855957	1	NaN	NaN	NaN	NaN	519	0	1	2425	2943
20140904-PurClathDigest-1ug-01	2947	31.842	43.095	789050	0	NaN	272220	0.39	+	4027	STDDSDPPTEEAR	13	87	710.297254638467	1418.57995634373	2	MULTI	HCD	FTMS	0	0	0	-1	0	0	0	0	4	Unmodified	_STDDSDPPTEEAR_	F1N3M8;G3MYP5	185.025695800781	1	NaN	NaN	NaN	NaN	520	0	1	2425	2943
20140904-PurClathDigest-1ug-01	2948	31.845	34.583	936480	0	NaN	61012	0.38	-	-1		0	151	792.01970387078	2373.03728221254	3	MULTI	HCD	FTMS	0	0	0	-1	0	0	0	0	5				NaN	1	NaN	NaN	NaN	NaN	521	0	1	2425	2943
20140904-PurClathDigest-1ug-01	2949	31.848	46.847	752860	0	NaN	159510	0.39	-	-1		0	39	336.244448627529	670.474344321858	2	MULTI	HCD	FTMS	0	0	0	-1	0	0	0	0	6				NaN	1	NaN	NaN	NaN	NaN	522	0	1	2425	2943
20140904-PurClathDigest-1ug-01	2950	31.852	62.295	390440	0	NaN	26156	0.41	-	-1		0	116	922.983068515046	1843.95158409689	2	MULTI	HCD	FTMS	0	0	0	-1	0	0	0	0	7				NaN	1	NaN	NaN	NaN	NaN	523	0	1	2425	2943
20140904-PurClathDigest-1ug-01	2952	31.864	16.478	2210500	0	NaN	1143300	0.41	-	-1		0	112	875.418112971826	NaN	0	PEAK	HCD	FTMS	0	0	0	-1	0	0	0	0	1				NaN	1	NaN	NaN	NaN	NaN	524	0	1	2426	2951
20140904-PurClathDigest-1ug-01	2953	31.868	26.816	2397100	0	NaN	529620	0.37	+	3579	RNEVLDR	7	115	451.245667226322	900.476781519444	2	MULTI	HCD	FTMS	0	0	0	-1	0	0	0	0	2	Unmodified	_RNEVLDR_	E1BFB0	138.121307373047	1	NaN	NaN	NaN	NaN	525	0	1	2426	2951
20140904-PurClathDigest-1ug-01	2954	31.871	15.074	12043000	0	NaN	380930	0.36	-	-1		0	212	475.614195317055	2373.03459425227	5	MULTI	HCD	FTMS	0	0	0	-1	0	0	0	0	3				NaN	1	NaN	NaN	NaN	NaN	526	0	1	2426	2951
20140904-PurClathDigest-1ug-01	2955	31.874	25.04	5306300	0	NaN	507930	0.37	-	-1		0	174	467.575797878053	1399.70556423436	3	MULTI	HCD	FTMS	0	0	0	-1	0	0	0	0	4				NaN	1	NaN	NaN	NaN	NaN	527	0	1	2426	2951
20140904-PurClathDigest-1ug-01	2956	31.877	21.76	1220100	0	NaN	179280	0.37	-	-1		0	114	548.502875599506	2189.98239653162	4	MULTI	HCD	FTMS	0	0	0	-1	0	0	0	0	5				NaN	1	NaN	NaN	NaN	NaN	528	0	1	2426	2951
20140904-PurClathDigest-1ug-01	2957	31.88	53.935	311290	0	NaN	25049	0.4	-	-1		0	85	508.247463289478	1014.48037364576	2	MULTI	HCD	FTMS	0	0	0	-1	0	0	0	0	6				NaN	1	NaN	NaN	NaN	NaN	529	0	1	2426	2951
20140904-PurClathDigest-1ug-01	2958	31.884	52.653	465920	0	NaN	41346	0.4	-	-1		0	108	1051.55441840394	2101.09428387468	2	MULTI	HCD	FTMS	0	0	0	-1	0	0	0	0	7				NaN	1	NaN	NaN	NaN	NaN	530	0	1	2426	2951
20140904-PurClathDigest-1ug-01	2960	31.896	5.657	4576200	0	NaN	473310	0.38	-	-1		0	125	701.369224850248	2101.08584515094	3	MULTI	HCD	FTMS	0	0	0	-1	0	0	0	0	1				NaN	1	NaN	NaN	NaN	NaN	531	0	1	2427	2959
20140904-PurClathDigest-1ug-01	2961	31.899	14.758	5636900	0	NaN	610580	0.36	+	2325	LAAEDATNEK	10	100	531.259114145126	1060.50367535705	2	MULTI	HCD	FTMS	0	0	0	-1	0	0	0	0	2	Unmodified	_LAAEDATNEK_	P02548	172.590301513672	1	NaN	NaN	NaN	NaN	532	0	1	2427	2959
20140904-PurClathDigest-1ug-01	2962	31.902	25.508	612050	0	NaN	74093	0.38	-	-1		0	109	1187.52787689207	2373.04120085094	2	MULTI	HCD	FTMS	0	0	0	-1	0	0	0	0	3				NaN	1	NaN	NaN	NaN	NaN	533	0	1	2427	2959
20140904-PurClathDigest-1ug-01	2963	31.905	22.165	2105500	0	NaN	98077	0.37	-	-1		0	152	619.323607321375	2473.2653234191	4	MULTI	HCD	FTMS	0	0	0	-1	0	0	0	0	4				NaN	1	NaN	NaN	NaN	NaN	534	0	1	2427	2959
20140904-PurClathDigest-1ug-01	2964	31.908	33.707	1747700	0	NaN	989100	0.38	+	587	DKTQEQESPVQEDKTMAPK	19	130	735.682921667744	2204.02693560343	3	MULTI	HCD	FTMS	0	0	0	-1	0	0	0	0	5	Oxidation (M)	_DKTQEQESPVQEDKTM(ox)APK_	F1N3M8;G3MYP5	90.1995468139648	1	NaN	NaN	NaN	NaN	535	0	1	2427	2959
20140904-PurClathDigest-1ug-01	2965	31.912	44.107	1498600	0	NaN	242690	0.39	-	-1		0	76	482.742314073048	963.470075212895	2	MULTI	HCD	FTMS	0	0	0	-1	0	0	0	0	6				NaN	1	NaN	NaN	NaN	NaN	536	0	1	2427	2959
20140904-PurClathDigest-1ug-01	2966	31.915	61.191	864030	0	NaN	156220	0.41	-	-1		0	122	501.27235837887	1000.53016382454	2	MULTI	HCD	FTMS	0	0	0	-1	0	0	0	0	7				NaN	1	NaN	NaN	NaN	NaN	537	0	1	2427	2959
20140904-PurClathDigest-1ug-01	2968	31.927	5.202	632840	0	NaN	56695	0.37	+	448	ATLEMVNHEK	10	44	396.529332544419	1186.56616823346	3	MULTI	HCD	FTMS	0	0	0	-1	0	0	0	0	1	Oxidation (M)	_ATLEM(ox)VNHEK_	F1MDZ2;O77788	53.9762191772461	1	NaN	NaN	NaN	NaN	538	0	1	2428	2967
20140904-PurClathDigest-1ug-01	2969	31.931	14.59	4306400	0	NaN	656880	0.36	+	945	ESLKPAAKPLPSK	13	120	455.941733799294	1364.80337199808	3	MULTI	HCD	FTMS	0	0	0	-1	0	0	0	0	2	Unmodified	_ESLKPAAKPLPSK_	F1N1S2	52.2086486816406	1	NaN	NaN	NaN	NaN	539	0	1	2428	2967
20140904-PurClathDigest-1ug-01	2970	31.934	15.138	3329100	0	NaN	425310	0.36	-	-1		0	155	517.914830014956	1550.72266064507	3	MULTI	HCD	FTMS	0	0	0	-1	0	0	0	0	3				NaN	1	NaN	NaN	NaN	NaN	540	0	1	2428	2967
20140904-PurClathDigest-1ug-01	2971	31.937	40.334	94318	0	NaN	4997.1	0.39	-	-1		0	58	596.811938357169	1191.60932378114	2	MULTI	HCD	FTMS	0	0	0	-1	0	0	0	0	4				NaN	1	NaN	NaN	NaN	NaN	541	0	1	2428	2967
20140904-PurClathDigest-1ug-01	2972	31.94	42.929	266880	0	NaN	29976	0.38	+	-1	FEEEAR	6	58	390.680563030229	779.346573127258	2	MULTI	HCD	FTMS	0	0	0	-1	0	0	0	0	5	Unmodified	_FEEEAR_	F1MDZ2;O77788	100.833198547363	1	NaN	NaN	NaN	NaN	542	0	1	2428	2967
20140904-PurClathDigest-1ug-01	2973	31.944	59.125	1156000	0	NaN	225910	0.4	-	-1		0	143	776.368619605434	1550.72268627767	2	MULTI	HCD	FTMS	0	0	0	-1	0	0	0	0	6				NaN	1	NaN	NaN	NaN	NaN	543	0	1	2428	2967
20140904-PurClathDigest-1ug-01	2974	31.947	75.959	591290	0	NaN	106480	0.42	+	946	ESLKPAAKPLPSK	13	107	683.409010166267	1364.80346739933	2	MULTI	HCD	FTMS	0	0	0	-1	0	0	0	0	7	Unmodified	_ESLKPAAKPLPSK_	F1N1S2	135.663101196289	1	NaN	NaN	NaN	NaN	544	0	1	2428	2967
20140904-PurClathDigest-1ug-01	2976	31.96	7.585	4296600	0	NaN	857580	0.38	-	-1		0	80	700.861188280974	NaN	0	PEAK	HCD	FTMS	0	0	0	-1	0	0	0	0	1				NaN	1	NaN	NaN	NaN	NaN	545	0	1	2429	2975
20140904-PurClathDigest-1ug-01	2977	31.963	33.168	1306100	0	NaN	233020	0.38	+	4671	VKIESVK	7	75	401.754852762519	801.495152591838	2	MULTI	HCD	FTMS	0	0	0	-1	0	0	0	0	2	Unmodified	_VKIESVK_	F1MEW3	60.6863708496094	1	NaN	NaN	NaN	NaN	546	0	1	2429	2975
20140904-PurClathDigest-1ug-01	2978	31.967	25.165	649130	0	NaN	62463	0.37	-	-1		0	105	661.322765781981	2641.26195726152	4	MULTI	HCD	FTMS	0	0	0	-1	0	0	0	0	3				NaN	1	NaN	NaN	NaN	NaN	547	0	1	2429	2975
20140904-PurClathDigest-1ug-01	2979	31.97	45.437	4331300	0	NaN	257490	0.39	+	518	DAMQYASESK	10	194	573.242613273808	1144.47067361442	2	MULTI	HCD	FTMS	0	0	0	-1	0	0	0	0	4	Oxidation (M)	_DAM(ox)QYASESK_	P49951;F1MPU0	135.046600341797	1	NaN	NaN	NaN	NaN	548	0	1	2429	2975
20140904-PurClathDigest-1ug-01	2980	31.973	47.098	2316100	0	NaN	470550	0.39	+	2223	KVFGDGSR	8	106	433.230056944286	864.445560955371	2	MULTI	HCD	FTMS	0	0	0	-1	0	0	0	0	5	Unmodified	_KVFGDGSR_	Q08DH7	149.722595214844	1	NaN	NaN	NaN	NaN	549	0	1	2429	2975
20140904-PurClathDigest-1ug-01	2981	31.977	54.474	240660	0	NaN	9858.2	0.41	-	-1		0	114	1103.0221933584	2204.0298337836	2	MULTI	HCD	FTMS	0	0	0	-1	0	0	0	0	6				NaN	1	NaN	NaN	NaN	NaN	550	0	1	2429	2975
20140904-PurClathDigest-1ug-01	2982	31.98	50.703	251930	0	NaN	13067	0.4	-	-1		0	82	825.429314735697	2473.26611480729	3	MULTI	HCD	FTMS	0	0	0	-1	0	0	0	0	7				NaN	1	NaN	NaN	NaN	NaN	551	0	1	2429	2975
20140904-PurClathDigest-1ug-01	2984	31.992	0.46	162570000	0	NaN	32956000	0.38	-	-1		0	77	399.201973123798	796.389393314396	2	MULTI	HCD	FTMS	0	0	0	-1	0	0	0	0	1				NaN	1	NaN	NaN	NaN	NaN	552	0	1	2430	2983
20140904-PurClathDigest-1ug-01	2985	31.996	4.408	30973000	0	NaN	2873200	0.35	+	2863	LQSEPESIRK	10	130	396.2191308924	1185.6355632774	3	MULTI	HCD	FTMS	0	0	0	-1	0	0	0	0	2	Unmodified	_LQSEPESIRK_	P04973	126.189903259277	1	NaN	NaN	NaN	NaN	553	0	1	2430	2983
20140904-PurClathDigest-1ug-01	2986	31.998	35.104	1807400	0	NaN	113140	0.38	+	3044	MQEQQADLQR	10	104	631.795413302313	1261.57627367143	2	MULTI	HCD	FTMS	0	0	0	-1	0	0	0	0	3	Oxidation (M)	_M(ox)QEQQADLQR_	F1MIC9	141.038101196289	1	NaN	NaN	NaN	NaN	554	0	1	2430	2983
20140904-PurClathDigest-1ug-01	2987	32.002	34.362	1381800	0	NaN	92822	0.37	-	-1		0	84	379.741646933226	757.468740933251	2	MULTI	HCD	FTMS	0	0	0	-1	0	0	0	0	4				NaN	1	NaN	NaN	NaN	NaN	555	0	1	2430	2983
20140904-PurClathDigest-1ug-01	2988	32.005	34.895	4163300	0	NaN	753240	0.38	-	-1		0	83	300.626137188621	599.237721444041	2	MULTI	HCD	FTMS	0	0	0	-1	0	0	0	0	5				NaN	1	NaN	NaN	NaN	NaN	556	0	1	2430	2983
20140904-PurClathDigest-1ug-01	2989	32.009	30.703	1933700	0	NaN	167940	0.37	-	-1		0	120	436.871138451216	1307.59158595385	3	MULTI	HCD	FTMS	0	0	0	-1	0	0	0	0	6				NaN	1	NaN	NaN	NaN	NaN	557	0	1	2430	2983
20140904-PurClathDigest-1ug-01	2990	32.012	31.628	823120	0	NaN	112130	0.38	-	-1		0	104	449.20905142922	1344.60532488786	3	MULTI	HCD	FTMS	0	0	0	-1	0	0	0	0	7				NaN	1	NaN	NaN	NaN	NaN	558	0	1	2430	2983
20140904-PurClathDigest-1ug-01	2992	32.023	0.996	51809000	0	NaN	9879400	0.38	+	2866	LQSEPESIRK	10	95	593.824584064165	1185.63461519513	2	MULTI	HCD	FTMS	0	0	0	-1	0	0	0	0	1	Unmodified	_LQSEPESIRK_	P04973	168.089996337891	1	NaN	NaN	NaN	NaN	559	0	1	2431	2991
20140904-PurClathDigest-1ug-01	2993	32.027	8.222	2059800	0	NaN	388280	0.36	-	-1		0	60	537.282772703024	1072.55099247285	2	MULTI	HCD	FTMS	0	0	0	-1	0	0	0	0	2				NaN	1	NaN	NaN	NaN	NaN	560	0	1	2431	2991
20140904-PurClathDigest-1ug-01	2994	32.029	11.186	4403200	0	NaN	283020	0.36	-	-1		0	124	516.267674925776	1545.78119537753	3	MULTI	HCD	FTMS	0	0	0	-1	0	0	0	0	3				NaN	1	NaN	NaN	NaN	NaN	561	0	1	2431	2991
20140904-PurClathDigest-1ug-01	2995	32.032	27.131	1505500	0	NaN	140230	0.38	-	-1		0	137	773.89753052241	1545.78050811162	2	MULTI	HCD	FTMS	0	0	0	-1	0	0	0	0	4				NaN	1	NaN	NaN	NaN	NaN	562	0	1	2431	2991
20140904-PurClathDigest-1ug-01	2996	32.036	21.071	2898100	0	NaN	301910	0.36	-	-1		0	108	358.864682134873	1073.57221700482	3	MULTI	HCD	FTMS	0	0	0	-1	0	0	0	0	5				NaN	1	NaN	NaN	NaN	NaN	563	0	1	2431	2991
20140904-PurClathDigest-1ug-01	2997	32.039	28.351	844380	0	NaN	103480	0.37	-	-1		0	83	473.253571672402	944.492590411604	2	MULTI	HCD	FTMS	0	0	0	-1	0	0	0	0	6				NaN	1	NaN	NaN	NaN	NaN	564	0	1	2431	2991
20140904-PurClathDigest-1ug-01	2998	32.042	45.478	150640	0	NaN	21862	0.39	-	-1		0	51	387.722114016982	773.429675100763	2	MULTI	HCD	FTMS	0	0	0	-1	0	0	0	0	7				NaN	1	NaN	NaN	NaN	NaN	565	0	1	2431	2991
20140904-PurClathDigest-1ug-01	3000	32.054	6.808	320820	0	NaN	31119	0.38	-	-1		0	35	528.769546189055	1055.52453944491	2	MULTI	HCD	FTMS	0	0	0	-1	0	0	0	0	1				NaN	1	NaN	NaN	NaN	NaN	566	0	1	2432	2999
20140904-PurClathDigest-1ug-01	3001	32.057	9.383	10852000	0	NaN	804870	0.35	-	-1		0	111	450.761127729679	899.507702526157	2	MULTI	HCD	FTMS	0	0	0	-1	0	0	0	0	2				NaN	1	NaN	NaN	NaN	NaN	567	0	1	2432	2999
20140904-PurClathDigest-1ug-01	3002	32.06	8.582	5737300	0	NaN	757500	0.35	-	-1		0	145	458.240561730701	1371.6998557923	3	MULTI	HCD	FTMS	0	0	0	-1	0	0	0	0	3				NaN	1	NaN	NaN	NaN	NaN	568	0	1	2432	2999
20140904-PurClathDigest-1ug-01	3003	32.063	17.178	2322700	0	NaN	496900	0.37	-	-1		0	116	686.85726118176	1371.69996943032	2	MULTI	HCD	FTMS	0	0	0	-1	0	0	0	0	4				NaN	1	NaN	NaN	NaN	NaN	569	0	1	2432	2999
20140904-PurClathDigest-1ug-01	3004	32.066	17.758	8014900	0	NaN	455440	0.36	+	51	AEMMELNDR	9	147	570.737022953621	1139.45949297404	2	MULTI	HCD	FTMS	0	0	0	-1	0	0	0	0	5	2 Oxidation (M)	_AEM(ox)M(ox)ELNDR_	Q28115	98.024528503418	1	NaN	NaN	NaN	NaN	570	0	1	2432	2999
20140904-PurClathDigest-1ug-01	3005	32.069	17.811	2244700	0	NaN	249240	0.36	+	4209	THINAVVAK	9	90	476.782385724771	951.550218516341	2	MULTI	HCD	FTMS	0	0	0	-1	0	0	0	0	6	Unmodified	_THINAVVAK_	E1BP30;Q1LZ76	111.783996582031	1	NaN	NaN	NaN	NaN	571	0	1	2432	2999
20140904-PurClathDigest-1ug-01	3006	32.072	15.842	2712300	0	NaN	375450	0.36	+	2589	LGDSHDLQR	9	86	347.508919470729	1039.50492901239	3	MULTI	HCD	FTMS	0	0	0	-1	0	0	0	0	7	Unmodified	_LGDSHDLQR_	E1BFB0	89.3951416015625	1	NaN	NaN	NaN	NaN	572	0	1	2432	2999
20140904-PurClathDigest-1ug-01	3008	32.083	5.286	17815000	0	NaN	4012000	0.39	+	3480	QTPLSR	6	77	351.200579020508	NaN	0	PEAK	HCD	FTMS	0	0	0	-1	0	0	0	0	1	Unmodified	_QTPLSR_	G3N252;P04975	106.716300964355	1	NaN	NaN	NaN	NaN	573	0	1	2433	3007
20140904-PurClathDigest-1ug-01	3009	32.087	6.195	5790900	0	NaN	231930	0.34	-	-1		0	130	520.241726914655	2076.93780179222	4	MULTI	HCD	FTMS	0	0	0	-1	0	0	0	0	2				NaN	1	NaN	NaN	NaN	NaN	574	0	1	2433	3007
20140904-PurClathDigest-1ug-01	3010	32.09	9.496	4850000	0	NaN	328390	0.36	-	-1		0	117	469.235573295546	1404.68489048684	3	MULTI	HCD	FTMS	0	0	0	-1	0	0	0	0	3				NaN	1	NaN	NaN	NaN	NaN	575	0	1	2433	3007
20140904-PurClathDigest-1ug-01	3011	32.093	10.617	1632400	0	NaN	123160	0.36	-	-1		0	109	693.318784040292	2076.93452272108	3	MULTI	HCD	FTMS	0	0	0	-1	0	0	0	0	4				NaN	1	NaN	NaN	NaN	NaN	576	0	1	2433	3007
20140904-PurClathDigest-1ug-01	3012	32.096	12.294	5551900	0	NaN	1133500	0.36	-	-1		0	133	500.87799175928	1499.61214587804	3	MULTI	HCD	FTMS	0	0	0	-1	0	0	0	0	5				NaN	1	NaN	NaN	NaN	NaN	577	0	1	2433	3007
20140904-PurClathDigest-1ug-01	3013	32.099	17.931	13840000	0	NaN	2883100	0.36	-	-1		0	106	342.195332820944	682.376112708689	2	MULTI	HCD	FTMS	0	0	0	-1	0	0	0	0	6				NaN	1	NaN	NaN	NaN	NaN	578	0	1	2433	3007
20140904-PurClathDigest-1ug-01	3014	32.102	32.762	1775800	0	NaN	379170	0.38	-	-1		0	102	750.813087295714	1499.61162165823	2	MULTI	HCD	FTMS	0	0	0	-1	0	0	0	0	7				NaN	1	NaN	NaN	NaN	NaN	579	0	1	2433	3007
20140904-PurClathDigest-1ug-01	3016	32.113	3.077	27193000	0	NaN	3476800	0.39	+	2953	LTQEPESIRK	10	116	400.890650527693	1199.65012218328	3	MULTI	HCD	FTMS	0	0	0	-1	0	0	0	0	1	Unmodified	_LTQEPESIRK_	G3N252;P04975	74.1438369750977	1	NaN	NaN	NaN	NaN	580	0	1	2434	3015
20140904-PurClathDigest-1ug-01	3017	32.116	5.382	18058000	0	NaN	3173600	0.35	+	2955	LTQEPESIRK	10	119	600.832186617948	1199.6498203027	2	MULTI	HCD	FTMS	0	0	0	-1	0	0	0	0	2	Unmodified	_LTQEPESIRK_	G3N252;P04975	147.823501586914	1	NaN	NaN	NaN	NaN	581	0	1	2434	3015
20140904-PurClathDigest-1ug-01	3018	32.119	8.102	6891000	0	NaN	423940	0.35	-	-1		0	121	490.754943863762	1958.99066958865	4	MULTI	HCD	FTMS	0	0	0	-1	0	0	0	0	3				NaN	1	NaN	NaN	NaN	NaN	582	0	1	2434	3015
20140904-PurClathDigest-1ug-01	3019	32.122	12.357	3638700	0	NaN	223950	0.36	-	-1		0	116	654.00428136716	1958.99101470168	3	MULTI	HCD	FTMS	0	0	0	-1	0	0	0	0	4				NaN	1	NaN	NaN	NaN	NaN	583	0	1	2434	3015
20140904-PurClathDigest-1ug-01	3020	32.125	18.584	5167000	0	NaN	568020	0.36	-	-1		0	103	433.721725614327	865.428898295455	2	MULTI	HCD	FTMS	0	0	0	-1	0	0	0	0	5				NaN	1	NaN	NaN	NaN	NaN	584	0	1	2434	3015
20140904-PurClathDigest-1ug-01	3021	32.128	23.805	428120	0	NaN	96015	0.37	-	-1		0	45	544.290717569388	1086.56688220558	2	MULTI	HCD	FTMS	0	0	0	-1	0	0	0	0	6				NaN	1	NaN	NaN	NaN	NaN	585	0	1	2434	3015
20140904-PurClathDigest-1ug-01	3022	32.131	27.523	1708600	0	NaN	100670	0.38	-	-1		0	115	597.801420955924	1193.58828897865	2	MULTI	HCD	FTMS	0	0	0	-1	0	0	0	0	7				NaN	1	NaN	NaN	NaN	NaN	586	0	1	2434	3015
20140904-PurClathDigest-1ug-01	3024	32.143	16.119	4048900	0	NaN	640820	0.38	-	-1		0	68	381.711033929538	761.407514925877	2	MULTI	HCD	FTMS	0	0	0	-1	0	0	0	0	1				NaN	1	NaN	NaN	NaN	NaN	587	0	1	2435	3023
20140904-PurClathDigest-1ug-01	3025	32.147	30.945	993850	0	NaN	73893	0.38	-	-1		0	99	858.40821647338	1714.80188001356	2	MULTI	HCD	FTMS	0	0	0	-1	0	0	0	0	2				NaN	1	NaN	NaN	NaN	NaN	588	0	1	2435	3023
20140904-PurClathDigest-1ug-01	3026	32.15	41.038	3753600	0	NaN	1425100	0.39	-	-1		0	162	703.349157839065	1404.68376274493	2	MULTI	HCD	FTMS	0	0	0	-1	0	0	0	0	3				NaN	1	NaN	NaN	NaN	NaN	589	0	1	2435	3023
20140904-PurClathDigest-1ug-01	3027	32.153	31.056	698360	0	NaN	145100	0.38	-	-1		0	59	493.766962152057	985.519371370915	2	MULTI	HCD	FTMS	0	0	0	-1	0	0	0	0	4				NaN	1	NaN	NaN	NaN	NaN	590	0	1	2435	3023
20140904-PurClathDigest-1ug-01	3028	32.156	42.096	435840	0	NaN	63954	0.39	-	-1		0	80	980.502640987745	1958.99072904229	2	MULTI	HCD	FTMS	0	0	0	-1	0	0	0	0	5				NaN	1	NaN	NaN	NaN	NaN	591	0	1	2435	3023
20140904-PurClathDigest-1ug-01	3029	32.16	40.371	389050	0	NaN	25430	0.39	-	-1		0	93	485.251863462589	968.489173991978	2	MULTI	HCD	FTMS	0	0	0	-1	0	0	0	0	6				NaN	1	NaN	NaN	NaN	NaN	592	0	1	2435	3023
20140904-PurClathDigest-1ug-01	3030	32.163	52.468	728320	0	NaN	79067	0.4	+	2326	LAAEDATNEK	10	108	531.259114145126	1060.50367535705	2	MULTI	HCD	FTMS	0	0	0	-1	0	0	0	0	7	Unmodified	_LAAEDATNEK_	P02548	160.222305297852	1	NaN	NaN	NaN	NaN	593	0	1	2435	3023
20140904-PurClathDigest-1ug-01	3032	32.175	7.031	2179500	0	NaN	1098400	0.38	-	-1		0	41	375.910454216014	1499.61271099766	4	MULTI	HCD	FTMS	0	0	0	-1	0	0	0	0	1				NaN	1	NaN	NaN	NaN	NaN	594	0	1	2436	3031
20140904-PurClathDigest-1ug-01	3033	32.179	13.761	4951100	0	NaN	924920	0.35	+	5065	YVETPR	6	93	382.700548716346	763.386544499492	2	MULTI	HCD	FTMS	0	0	0	-1	0	0	0	0	2	Unmodified	_YVETPR_	P02548	129.958206176758	1	NaN	NaN	NaN	NaN	595	0	1	2436	3031
20140904-PurClathDigest-1ug-01	3034	32.182	23.432	4283300	0	NaN	586460	0.36	+	755	EEIHEYR	7	97	488.230149231783	974.445745530367	2	MULTI	HCD	FTMS	0	0	0	-1	0	0	0	0	3	Unmodified	_EEIHEYR_	Q08DH7	231.651702880859	1	NaN	NaN	NaN	NaN	596	0	1	2436	3031
20140904-PurClathDigest-1ug-01	3035	32.185	15.993	709200	0	NaN	73873	0.36	-	-1		0	80	467.575797878053	1399.70556423436	3	MULTI	HCD	FTMS	0	0	0	-1	0	0	0	0	4				NaN	1	NaN	NaN	NaN	NaN	597	0	1	2436	3031
20140904-PurClathDigest-1ug-01	3036	32.188	17.246	1650600	0	NaN	169910	0.36	-	-1		0	109	429.707433033083	1714.80062626593	4	MULTI	HCD	FTMS	0	0	0	-1	0	0	0	0	5				NaN	1	NaN	NaN	NaN	NaN	598	0	1	2436	3031
20140904-PurClathDigest-1ug-01	3037	32.191	32.833	4729600	0	NaN	826940	0.37	-	-1		0	111	333.682587253438	665.350621573676	2	MULTI	HCD	FTMS	0	0	0	-1	0	0	0	0	6				NaN	1	NaN	NaN	NaN	NaN	599	0	1	2436	3031
20140904-PurClathDigest-1ug-01	3038	32.194	40.558	609650	0	NaN	55412	0.38	+	5057	YPVATQK	7	65	403.723364098892	805.432175264585	2	MULTI	HCD	FTMS	0	0	0	-1	0	0	0	0	7	Unmodified	_YPVATQK_	F1N3M8;G3MYP5	107.559799194336	1	NaN	NaN	NaN	NaN	600	0	1	2436	3031
20140904-PurClathDigest-1ug-01	3040	32.206	15.583	3168600	0	NaN	529100	0.4	-	-1		0	123	576.599203206228	1726.77578021888	3	MULTI	HCD	FTMS	0	0	0	-1	0	0	0	0	1				NaN	1	NaN	NaN	NaN	NaN	601	0	1	2437	3039
20140904-PurClathDigest-1ug-01	3041	32.21	15.764	324520	0	NaN	33661	0.36	-	-1		0	51	371.407739698737	1481.60185292855	4	MULTI	HCD	FTMS	0	0	0	-1	0	0	0	0	2				NaN	1	NaN	NaN	NaN	NaN	602	0	1	2437	3039
20140904-PurClathDigest-1ug-01	3042	32.213	30.045	556440	0	NaN	41618	0.37	-	-1		0	89	541.70515965778	1081.39576638236	2	MULTI	HCD	FTMS	0	0	0	-1	0	0	0	0	3				NaN	1	NaN	NaN	NaN	NaN	603	0	1	2437	3039
20140904-PurClathDigest-1ug-01	3043	32.216	24.998	1906000	0	NaN	278280	0.37	+	637	DQAPERKDEDLEPK	14	133	557.272223862308	1668.79484218712	3	MULTI	HCD	FTMS	0	0	0	-1	0	0	0	0	4	Unmodified	_DQAPERKDEDLEPK_	F1N3M8;G3MYP5	65.8364562988281	1	NaN	NaN	NaN	NaN	604	0	1	2437	3039
20140904-PurClathDigest-1ug-01	3044	32.219	40.268	128770	0	NaN	17746	0.39	-	-1		0	50	549.28227943847	1096.55000594374	2	MULTI	HCD	FTMS	0	0	0	-1	0	0	0	0	5				NaN	1	NaN	NaN	NaN	NaN	605	0	1	2437	3039
20140904-PurClathDigest-1ug-01	3045	32.222	42.649	986540	0	NaN	273120	0.39	-	-1		0	101	629.79513729576	1257.57572165832	2	MULTI	HCD	FTMS	0	0	0	-1	0	0	0	0	6				NaN	1	NaN	NaN	NaN	NaN	606	0	1	2437	3039
20140904-PurClathDigest-1ug-01	3046	32.226	22.113	2681200	0	NaN	200310	0.37	+	1851	KAEEEREGEVGVPDHSPR	18	133	505.997145442425	2019.9594759033	4	MULTI	HCD	FTMS	0	0	0	-1	0	0	0	0	7	Unmodified	_KAEEEREGEVGVPDHSPR_	G3MYP5	73.6644973754883	1	NaN	NaN	NaN	NaN	607	0	1	2437	3039
20140904-PurClathDigest-1ug-01	3048	32.237	1.844	30559000	0	NaN	3678000	0.38	+	2864	LQSEPESIRK	10	100	396.2191308924	1185.6355632774	3	MULTI	HCD	FTMS	0	0	0	-1	0	0	0	0	1	Unmodified	_LQSEPESIRK_	P04973	103.678001403809	1	NaN	NaN	NaN	NaN	608	0	1	2438	3047
20140904-PurClathDigest-1ug-01	3049	32.241	14.94	4975700	0	NaN	901150	0.36	+	1578	IGSTDNIK	8	94	424.229654603652	846.444756274104	2	MULTI	HCD	FTMS	0	0	0	-1	0	0	0	0	2	Unmodified	_IGSTDNIK_	F1MEW3	125.097900390625	1	NaN	NaN	NaN	NaN	609	0	1	2438	3047
20140904-PurClathDigest-1ug-01	3050	32.244	18.127	1137300	0	NaN	95201	0.37	-	-1		0	114	694.340589205114	2079.99993821554	3	MULTI	HCD	FTMS	0	0	0	-1	0	0	0	0	3				NaN	1	NaN	NaN	NaN	NaN	610	0	1	2438	3047
20140904-PurClathDigest-1ug-01	3051	32.247	29.996	61401	0	NaN	7948.2	0.38	-	-1		0	27	642.775827963862	1283.53710299452	2	MULTI	HCD	FTMS	0	0	0	-1	0	0	0	0	4				NaN	1	NaN	NaN	NaN	NaN	611	0	1	2438	3047
20140904-PurClathDigest-1ug-01	3052	32.25	34.437	2488800	0	NaN	816450	0.38	+	3245	NNRPSEGPLQTR	12	103	684.851889415328	1367.68922589746	2	MULTI	HCD	FTMS	0	0	0	-1	0	0	0	0	5	Unmodified	_NNRPSEGPLQTR_	P49951;F1MPU0	114.493103027344	1	NaN	NaN	NaN	NaN	612	0	1	2438	3047
20140904-PurClathDigest-1ug-01	3053	32.253	30.544	3126600	0	NaN	196820	0.38	+	3251	NNRPSEGPLQTR	12	140	456.903858272444	1367.68974541753	3	MULTI	HCD	FTMS	0	0	0	-1	0	0	0	0	6	Unmodified	_NNRPSEGPLQTR_	P49951;F1MPU0	190.92610168457	1	NaN	NaN	NaN	NaN	613	0	1	2438	3047
20140904-PurClathDigest-1ug-01	3054	32.257	30.855	1201800	0	NaN	101580	0.37	+	1852	KAEEEREGEVGVPDHSPR	18	111	674.32747318425	2019.96059015295	3	MULTI	HCD	FTMS	0	0	0	-1	0	0	0	0	7	Unmodified	_KAEEEREGEVGVPDHSPR_	G3MYP5	134.298706054688	1	NaN	NaN	NaN	NaN	614	0	1	2438	3047
20140904-PurClathDigest-1ug-01	3056	32.268	2.52	14170000	0	NaN	1768600	0.38	-	-1		0	113	432.701166395643	1726.77555971617	4	MULTI	HCD	FTMS	0	0	0	-1	0	0	0	0	1				NaN	1	NaN	NaN	NaN	NaN	615	0	1	2439	3055
20140904-PurClathDigest-1ug-01	3057	32.271	4.64	7923000	0	NaN	1541200	0.35	+	2867	LQSEPESIRK	10	85	593.824584064165	1185.63461519513	2	MULTI	HCD	FTMS	0	0	0	-1	0	0	0	0	2	Unmodified	_LQSEPESIRK_	P04973	152.998596191406	1	NaN	NaN	NaN	NaN	616	0	1	2439	3055
20140904-PurClathDigest-1ug-01	3058	32.274	13.842	2703800	0	NaN	423540	0.36	-	-1		0	90	864.394951874481	1726.77535081576	2	MULTI	HCD	FTMS	0	0	0	-1	0	0	0	0	3				NaN	1	NaN	NaN	NaN	NaN	617	0	1	2439	3055
20140904-PurClathDigest-1ug-01	3059	32.277	19.881	869930	0	NaN	120380	0.37	-	-1		0	105	813.726035904569	2438.15627831391	3	MULTI	HCD	FTMS	0	0	0	-1	0	0	0	0	4				NaN	1	NaN	NaN	NaN	NaN	618	0	1	2439	3055
20140904-PurClathDigest-1ug-01	3060	32.28	25.342	474320	0	NaN	93512	0.37	-	-1		0	70	551.215284267329	1650.62402340219	3	MULTI	HCD	FTMS	0	0	0	-1	0	0	0	0	5				NaN	1	NaN	NaN	NaN	NaN	619	0	1	2439	3055
20140904-PurClathDigest-1ug-01	3061	32.284	36.246	97159	0	NaN	15404	0.38	-	-1		0	39	585.754529629956	1169.49450632671	2	MULTI	HCD	FTMS	0	0	0	-1	0	0	0	0	6				NaN	1	NaN	NaN	NaN	NaN	620	0	1	2439	3055
20140904-PurClathDigest-1ug-01	3062	32.287	43.364	600490	0	NaN	114590	0.37	+	638	DQAPERKDEDLEPK	14	88	835.405142608224	1668.79573228325	2	MULTI	HCD	FTMS	0	0	0	-1	0	0	0	0	7	Unmodified	_DQAPERKDEDLEPK_	F1N3M8;G3MYP5	119.788497924805	1	NaN	NaN	NaN	NaN	621	0	1	2439	3055
20140904-PurClathDigest-1ug-01	3064	32.299	12.499	2895600	0	NaN	298910	0.38	+	908	ERFEEEAR	8	79	355.837023955687	1064.48924246726	3	MULTI	HCD	FTMS	0	0	0	-1	0	0	0	0	1	Unmodified	_ERFEEEAR_	F1MDZ2;O77788	117.482299804688	1	NaN	NaN	NaN	NaN	622	0	1	2440	3063
20140904-PurClathDigest-1ug-01	3065	32.302	28.027	1714000	0	NaN	114910	0.37	-	-1		0	133	573.242613273808	1144.47067361442	2	MULTI	HCD	FTMS	0	0	0	-1	0	0	0	0	2				NaN	1	NaN	NaN	NaN	NaN	623	0	1	2440	3063
20140904-PurClathDigest-1ug-01	3066	32.305	32.145	78888	0	NaN	21501	0.38	-	-1		0	32	1022.52224248896	2043.02993204473	2	MULTI	HCD	FTMS	0	0	0	-1	0	0	0	0	3				NaN	1	NaN	NaN	NaN	NaN	624	0	1	2440	3063
20140904-PurClathDigest-1ug-01	3067	32.309	37.093	262840	0	NaN	13870	0.39	-	-1		0	88	1041.0079792078	2080.00140548241	2	MULTI	HCD	FTMS	0	0	0	-1	0	0	0	0	4				NaN	1	NaN	NaN	NaN	NaN	625	0	1	2440	3063
20140904-PurClathDigest-1ug-01	3068	32.312	29.995	3269700	0	NaN	447900	0.38	+	1846	KAEEEKAPAIPK	12	138	437.581785429412	1309.72352688844	3	MULTI	HCD	FTMS	0	0	0	-1	0	0	0	0	5	Unmodified	_KAEEEKAPAIPK_	F1MSQ6	128.259399414063	1	NaN	NaN	NaN	NaN	626	0	1	2440	3063
20140904-PurClathDigest-1ug-01	3069	32.315	43.983	29517	0	NaN	5806	0.39	-	-1		0	22	1172.50453943456	2342.99452593593	2	MULTI	HCD	FTMS	0	0	0	-1	0	0	0	0	6				NaN	1	NaN	NaN	NaN	NaN	627	0	1	2440	3063
20140904-PurClathDigest-1ug-01	3070	32.319	29.799	2131100	0	NaN	526430	0.37	+	2925	LSKEEIER	8	92	335.185425428698	1002.53444688629	3	MULTI	HCD	FTMS	0	0	0	-1	0	0	0	0	7	Unmodified	_LSKEEIER_	P0CB32;Q27965;Q27975	98.4751892089844	1	NaN	NaN	NaN	NaN	628	0	1	2440	3063
20140904-PurClathDigest-1ug-01	3072	32.33	1.486	23089000	0	NaN	5283100	0.38	-	-1		0	106	500.87799175928	1499.61214587804	3	MULTI	HCD	FTMS	0	0	0	-1	0	0	0	0	1				NaN	1	NaN	NaN	NaN	NaN	629	0	1	2441	3071
20140904-PurClathDigest-1ug-01	3073	32.334	15.871	3317600	0	NaN	739190	0.35	-	-1		0	61	351.200579020508	NaN	0	PEAK	HCD	FTMS	0	0	0	-1	0	0	0	0	2				NaN	1	NaN	NaN	NaN	NaN	630	0	1	2441	3071
20140904-PurClathDigest-1ug-01	3074	32.337	13.725	1716300	0	NaN	197380	0.36	-	-1		0	130	610.545607588346	2438.15332448698	4	MULTI	HCD	FTMS	0	0	0	-1	0	0	0	0	3				NaN	1	NaN	NaN	NaN	NaN	631	0	1	2441	3071
20140904-PurClathDigest-1ug-01	3075	32.34	18.342	94440	0	NaN	34731	0.37	-	-1		0	17	857.725408930498	2570.15439739169	3	MULTI	HCD	FTMS	0	0	0	-1	0	0	0	0	4				NaN	1	NaN	NaN	NaN	NaN	632	0	1	2441	3071
20140904-PurClathDigest-1ug-01	3076	32.343	35.011	1321600	0	NaN	91651	0.38	+	4401	TVEMRDGEVIK	11	120	646.829292097206	1291.64403126121	2	MULTI	HCD	FTMS	0	0	0	-1	0	0	0	0	5	Oxidation (M)	_TVEM(ox)RDGEVIK_	Q28115	61.2535591125488	1	NaN	NaN	NaN	NaN	633	0	1	2441	3071
20140904-PurClathDigest-1ug-01	3077	32.346	35.239	3792400	0	NaN	786210	0.38	+	1653	IREEYPDR	8	115	539.270021012298	1076.5254890914	2	MULTI	HCD	FTMS	0	0	0	-1	0	0	0	0	6	Unmodified	_IREEYPDR_	CON__ENSEMBL:ENSBTAP00000025008;G3N1W7;G3X7R8;E1BJK2;G3X7R7;Q2KJD0;Q3MHM5;Q6B856;E1BJB1;Q2HJ81	137.581695556641	1	NaN	NaN	NaN	NaN	634	0	1	2441	3071
20140904-PurClathDigest-1ug-01	3078	32.349	19.62	8203600	0	NaN	696620	0.36	-	-1		0	166	428.199144537504	1708.76747228362	4	MULTI	HCD	FTMS	0	0	0	-1	0	0	0	0	7				NaN	1	NaN	NaN	NaN	NaN	635	0	1	2441	3071
20140904-PurClathDigest-1ug-01	3080	32.361	1.42	28836000	0	NaN	4581900	0.39	+	2954	LTQEPESIRK	10	96	400.890650527693	1199.65012218328	3	MULTI	HCD	FTMS	0	0	0	-1	0	0	0	0	1	Unmodified	_LTQEPESIRK_	G3N252;P04975	89.5868911743164	1	NaN	NaN	NaN	NaN	636	0	1	2442	3079
20140904-PurClathDigest-1ug-01	3081	32.364	2.797	13308000	0	NaN	2829500	0.35	+	2956	LTQEPESIRK	10	96	600.832186617948	1199.6498203027	2	MULTI	HCD	FTMS	0	0	0	-1	0	0	0	0	2	Unmodified	_LTQEPESIRK_	G3N252;P04975	175.089996337891	1	NaN	NaN	NaN	NaN	637	0	1	2442	3079
20140904-PurClathDigest-1ug-01	3082	32.367	5.028	9343200	0	NaN	1890900	0.35	+	2135	KLLEGEENR	9	91	544.290717569388	1086.56688220558	2	MULTI	HCD	FTMS	0	0	0	-1	0	0	0	0	3	Unmodified	_KLLEGEENR_	Q28115	155.113403320313	1	NaN	NaN	NaN	NaN	638	0	1	2442	3079
20140904-PurClathDigest-1ug-01	3083	32.37	9.893	2639600	0	NaN	591400	0.36	-	-1		0	77	750.813087295714	1499.61162165823	2	MULTI	HCD	FTMS	0	0	0	-1	0	0	0	0	4				NaN	1	NaN	NaN	NaN	NaN	639	0	1	2442	3079
20140904-PurClathDigest-1ug-01	3084	32.373	8.496	18221000	0	NaN	1935300	0.36	+	4655	VHYLEQQNK	9	143	579.798453178515	1157.58235342383	2	MULTI	HCD	FTMS	0	0	0	-1	0	0	0	0	5	Unmodified	_VHYLEQQNK_	F1MDZ2;O77788	174.670593261719	1	NaN	NaN	NaN	NaN	640	0	1	2442	3079
20140904-PurClathDigest-1ug-01	3085	32.376	22.777	6496600	0	NaN	1380300	0.37	-	-1		0	150	570.809730009856	1139.60490708651	2	MULTI	HCD	FTMS	0	0	0	-1	0	0	0	0	6				NaN	1	NaN	NaN	NaN	NaN	641	0	1	2442	3079
20140904-PurClathDigest-1ug-01	3086	32.379	17.482	1953200	0	NaN	361160	0.36	-	-1		0	101	491.543107180889	1471.60749214287	3	MULTI	HCD	FTMS	0	0	0	-1	0	0	0	0	7				NaN	1	NaN	NaN	NaN	NaN	642	0	1	2442	3079
20140904-PurClathDigest-1ug-01	3088	32.39	3.891	8518000	0	NaN	1538700	0.39	+	4656	VHYLEQQNK	9	78	386.868382000409	1157.58331660143	3	MULTI	HCD	FTMS	0	0	0	-1	0	0	0	0	1	Unmodified	_VHYLEQQNK_	F1MDZ2;O77788	107.040100097656	1	NaN	NaN	NaN	NaN	643	0	1	2443	3087
20140904-PurClathDigest-1ug-01	3089	32.394	10.08	1442300	0	NaN	147530	0.35	+	2136	KLLEGEENR	9	75	363.196434273756	1086.56747342147	3	MULTI	HCD	FTMS	0	0	0	-1	0	0	0	0	2	Unmodified	_KLLEGEENR_	Q28115	106.660003662109	1	NaN	NaN	NaN	NaN	644	0	1	2443	3087
20140904-PurClathDigest-1ug-01	3090	32.397	16.049	10743000	0	NaN	1916000	0.35	-	-1		0	103	354.660552784664	707.306552636128	2	MULTI	HCD	FTMS	0	0	0	-1	0	0	0	0	3				NaN	1	NaN	NaN	NaN	NaN	645	0	1	2443	3087
20140904-PurClathDigest-1ug-01	3091	32.4	13.852	3295000	0	NaN	510640	0.35	+	1654	IREEYPDR	8	81	359.849131172211	1076.52556411683	3	MULTI	HCD	FTMS	0	0	0	-1	0	0	0	0	4	Unmodified	_IREEYPDR_	CON__ENSEMBL:ENSBTAP00000025008;G3N1W7;G3X7R8;E1BJK2;G3X7R7;Q2KJD0;Q3MHM5;Q6B856;E1BJB1;Q2HJ81	86.2580490112305	1	NaN	NaN	NaN	NaN	646	0	1	2443	3087
20140904-PurClathDigest-1ug-01	3092	32.402	24.533	1492700	0	NaN	370950	0.37	-	-1		0	122	736.810959213626	1471.60736549405	2	MULTI	HCD	FTMS	0	0	0	-1	0	0	0	0	5				NaN	1	NaN	NaN	NaN	NaN	647	0	1	2443	3087
20140904-PurClathDigest-1ug-01	3093	32.406	17.661	11636000	0	NaN	568780	0.36	-	-1		0	206	562.613001369024	1684.81717470727	3	MULTI	HCD	FTMS	0	0	0	-1	0	0	0	0	6				NaN	1	NaN	NaN	NaN	NaN	648	0	1	2443	3087
20140904-PurClathDigest-1ug-01	3094	32.409	29.961	1261300	0	NaN	115600	0.38	-	-1		0	146	760.361142421743	1518.70773191029	2	MULTI	HCD	FTMS	0	0	0	-1	0	0	0	0	7				NaN	1	NaN	NaN	NaN	NaN	649	0	1	2443	3087
20140904-PurClathDigest-1ug-01	3096	32.42	1.58	40229000	0	NaN	7801000	0.38	+	351	AQLEEASSAR	10	95	531.264776523596	1060.51500011399	2	MULTI	HCD	FTMS	0	0	0	-1	0	0	0	0	1	Unmodified	_AQLEEASSAR_	Q08DH7	164.723205566406	1	NaN	NaN	NaN	NaN	650	0	1	2444	3095
20140904-PurClathDigest-1ug-01	3097	32.424	7.508	5083300	0	NaN	416300	0.35	+	850	EKVEEVGGKEEGGLK	15	127	794.414867976555	1586.81518301991	2	MULTI	HCD	FTMS	0	0	0	-1	0	0	0	0	2	Unmodified	_EKVEEVGGKEEGGLK_	F1MDZ2;O77788	172.791702270508	1	NaN	NaN	NaN	NaN	651	0	1	2444	3095
20140904-PurClathDigest-1ug-01	3098	32.426	15.397	2029700	0	NaN	210490	0.36	-	-1		0	126	843.415754754037	1684.81695657487	2	MULTI	HCD	FTMS	0	0	0	-1	0	0	0	0	3				NaN	1	NaN	NaN	NaN	NaN	652	0	1	2444	3095
20140904-PurClathDigest-1ug-01	3099	32.429	8.376	3058300	0	NaN	184280	0.35	-	-1		0	95	422.211818431817	1684.81816786087	4	MULTI	HCD	FTMS	0	0	0	-1	0	0	0	0	4				NaN	1	NaN	NaN	NaN	NaN	653	0	1	2444	3095
20140904-PurClathDigest-1ug-01	3100	32.432	24.244	1759200	0	NaN	266620	0.37	+	1847	KAEEEKAPAIPK	12	132	655.869499265419	1309.72444559764	2	MULTI	HCD	FTMS	0	0	0	-1	0	0	0	0	5	Unmodified	_KAEEEKAPAIPK_	F1MSQ6	98.6952514648438	1	NaN	NaN	NaN	NaN	654	0	1	2444	3095
20140904-PurClathDigest-1ug-01	3101	32.435	17.015	2051300	0	NaN	501610	0.36	+	1586	IIAPPERK	8	58	308.527455572798	922.560537318594	3	MULTI	HCD	FTMS	0	0	0	-1	0	0	0	0	6	Unmodified	_IIAPPERK_	F1MKC4;F1MRD0;P60712;Q3ZC07;Q5E9B5;P62739;P63258;P68138;G8JKX4	75.0475311279297	1	NaN	NaN	NaN	NaN	655	0	1	2444	3095
20140904-PurClathDigest-1ug-01	3102	32.438	30.674	3121400	0	NaN	897440	0.38	-	-1		0	116	627.83099046152	1253.64742798984	2	MULTI	HCD	FTMS	0	0	0	-1	0	0	0	0	7				NaN	1	NaN	NaN	NaN	NaN	656	0	1	2444	3095
20140904-PurClathDigest-1ug-01	3104	32.45	6.582	8465500	0	NaN	1170100	0.39	-	-1		0	152	556.256639801453	1665.74809000456	3	MULTI	HCD	FTMS	0	0	0	-1	0	0	0	0	1				NaN	1	NaN	NaN	NaN	NaN	657	0	1	2445	3103
20140904-PurClathDigest-1ug-01	3105	32.454	11.167	7071500	0	NaN	747690	0.34	-	-1		0	82	427.711635644874	853.408718356548	2	MULTI	HCD	FTMS	0	0	0	-1	0	0	0	0	2				NaN	1	NaN	NaN	NaN	NaN	658	0	1	2445	3103
20140904-PurClathDigest-1ug-01	3106	32.456	8.71	2746500	0	NaN	521650	0.36	-	-1		0	109	576.599203206228	1726.77578021888	3	MULTI	HCD	FTMS	0	0	0	-1	0	0	0	0	3				NaN	1	NaN	NaN	NaN	NaN	659	0	1	2445	3103
20140904-PurClathDigest-1ug-01	3107	32.459	9.143	350880	0	NaN	48656	0.35	-	-1		0	36	397.711342665963	1586.81626479745	4	MULTI	HCD	FTMS	0	0	0	-1	0	0	0	0	4				NaN	1	NaN	NaN	NaN	NaN	660	0	1	2445	3103
20140904-PurClathDigest-1ug-01	3108	32.462	20.17	1601800	0	NaN	213980	0.37	+	1210	GGSGGSYGGGGSGGGYGGGSGSR	23	121	896.367374673247	1790.72019641329	2	MULTI	HCD	FTMS	0	0	0	-1	0	0	0	0	5	Unmodified	_GGSGGSYGGGGSGGGYGGGSGSR_	CON__P35527	164.860198974609	1	NaN	NaN	NaN	NaN	661	0	1	2445	3103
20140904-PurClathDigest-1ug-01	3109	32.465	22.487	3730700	0	NaN	660090	0.37	-	-1		0	172	833.881653482924	1665.74875403265	2	MULTI	HCD	FTMS	0	0	0	-1	0	0	0	0	6				NaN	1	NaN	NaN	NaN	NaN	662	0	1	2445	3103
20140904-PurClathDigest-1ug-01	3110	32.468	27.803	1554500	0	NaN	97644	0.38	+	2160	KPGNNEGSGAPSPLSK	16	151	770.39151418745	1538.7684754417	2	MULTI	HCD	FTMS	0	0	0	-1	0	0	0	0	7	Unmodified	_KPGNNEGSGAPSPLSK_	F1MGT4	163.585800170898	1	NaN	NaN	NaN	NaN	663	0	1	2445	3103
20140904-PurClathDigest-1ug-01	3112	32.479	1.307	49468000	0	NaN	16228000	0.41	+	3246	NNRPSEGPLQTR	12	98	684.851889415328	1367.68922589746	2	MULTI	HCD	FTMS	0	0	0	-1	0	0	0	0	1	Unmodified	_NNRPSEGPLQTR_	P49951;F1MPU0	204.580902099609	1	NaN	NaN	NaN	NaN	664	0	1	2446	3111
20140904-PurClathDigest-1ug-01	3113	32.483	1.119	79621000	0	NaN	5728600	0.35	+	3252	NNRPSEGPLQTR	12	138	456.903858272444	1367.68974541753	3	MULTI	HCD	FTMS	0	0	0	-1	0	0	0	0	2	Unmodified	_NNRPSEGPLQTR_	P49951;F1MPU0	184.671401977539	1	NaN	NaN	NaN	NaN	665	0	1	2446	3111
20140904-PurClathDigest-1ug-01	3114	32.486	2.041	10979000	0	NaN	805570	0.35	+	851	EKVEEVGGKEEGGLK	15	105	529.945901945739	1586.81587643742	3	MULTI	HCD	FTMS	0	0	0	-1	0	0	0	0	3	Unmodified	_EKVEEVGGKEEGGLK_	F1MDZ2;O77788	108.355201721191	1	NaN	NaN	NaN	NaN	666	0	1	2446	3111
20140904-PurClathDigest-1ug-01	3115	32.489	5.177	8398800	0	NaN	1302700	0.35	+	744	EASPPISGDK	10	80	500.751328752484	999.488104571768	2	MULTI	HCD	FTMS	0	0	0	-1	0	0	0	0	4	Unmodified	_EASPPISGDK_	F1MEW3	110.184501647949	1	NaN	NaN	NaN	NaN	667	0	1	2446	3111
20140904-PurClathDigest-1ug-01	3116	32.492	6.946	15942000	0	NaN	4457500	0.35	-	-1		0	118	572.272957110032	1142.53136128686	2	MULTI	HCD	FTMS	0	0	0	-1	0	0	0	0	5				NaN	1	NaN	NaN	NaN	NaN	668	0	1	2446	3111
20140904-PurClathDigest-1ug-01	3117	32.494	7.771	9815400	0	NaN	1461500	0.35	+	1339	GSPSTVSSSYK	11	113	550.267314177465	1098.52007542173	2	MULTI	HCD	FTMS	0	0	0	-1	0	0	0	0	6	Unmodified	_GSPSTVSSSYK_	F1MDZ2;O77788	91.6437835693359	1	NaN	NaN	NaN	NaN	669	0	1	2446	3111
20140904-PurClathDigest-1ug-01	3118	32.497	5.004	5883500	0	NaN	542060	0.35	+	302	ALVTTHHLMVHGNER	15	108	433.474304919443	1729.86811381137	4	MULTI	HCD	FTMS	0	0	0	-1	0	0	0	0	7	Oxidation (M)	_ALVTTHHLM(ox)VHGNER_	F1MGT4	68.0256118774414	1	NaN	NaN	NaN	NaN	670	0	1	2446	3111
20140904-PurClathDigest-1ug-01	3120	32.508	4.379	14871000	0	NaN	7313300	0.39	-	-1		0	57	388.24491579645	774.4752786597	2	MULTI	HCD	FTMS	0	0	0	-1	0	0	0	0	1				NaN	1	NaN	NaN	NaN	NaN	671	0	1	2447	3119
20140904-PurClathDigest-1ug-01	3121	32.512	9.158	6451200	0	NaN	1024300	0.35	+	4384	TSVSSVSASPSR	12	91	582.795827647092	1163.57710236098	2	MULTI	HCD	FTMS	0	0	0	-1	0	0	0	0	2	Unmodified	_TSVSSVSASPSR_	F1MSQ6	159.982604980469	1	NaN	NaN	NaN	NaN	672	0	1	2447	3119
20140904-PurClathDigest-1ug-01	3122	32.515	10.041	3532900	0	NaN	765910	0.36	+	673	DSYVGDEAQSKR	12	95	677.81551837917	1353.61648382514	2	MULTI	HCD	FTMS	0	0	0	-1	0	0	0	0	3	Unmodified	_DSYVGDEAQSKR_	F1MRD0;P60712;Q3ZC07;Q5E9B5;P62739;P63258;P68138;G8JKX4	213.559692382813	1	NaN	NaN	NaN	NaN	673	0	1	2447	3119
20140904-PurClathDigest-1ug-01	3123	32.518	10.754	2969300	0	NaN	256040	0.36	-	-1		0	116	690.361791203808	1378.70902947442	2	MULTI	HCD	FTMS	0	0	0	-1	0	0	0	0	4				NaN	1	NaN	NaN	NaN	NaN	674	0	1	2447	3119
20140904-PurClathDigest-1ug-01	3124	32.521	8.947	6084600	0	NaN	405250	0.36	-	-1		0	137	460.577122824595	1378.70953907399	3	MULTI	HCD	FTMS	0	0	0	-1	0	0	0	0	5				NaN	1	NaN	NaN	NaN	NaN	675	0	1	2447	3119
20140904-PurClathDigest-1ug-01	3125	32.524	9.237	3344300	0	NaN	396970	0.35	-	-1		0	86	418.889907180201	1253.6478921408	3	MULTI	HCD	FTMS	0	0	0	-1	0	0	0	0	6				NaN	1	NaN	NaN	NaN	NaN	676	0	1	2447	3119
20140904-PurClathDigest-1ug-01	3126	32.527	16.237	2663900	0	NaN	1005800	0.36	-	-1		0	63	338.710620951835	675.40668897047	2	MULTI	HCD	FTMS	0	0	0	-1	0	0	0	0	7				NaN	1	NaN	NaN	NaN	NaN	677	0	1	2447	3119
20140904-PurClathDigest-1ug-01	3128	32.538	4.493	234690	0	NaN	31106	0.39	-	-1		0	19	912.800365132141	2735.37926599662	3	MULTI	HCD	FTMS	0	0	0	-1	0	0	0	0	1				NaN	1	NaN	NaN	NaN	NaN	678	0	1	2448	3127
20140904-PurClathDigest-1ug-01	3129	32.541	7.495	2286700	0	NaN	146740	0.36	-	-1		0	104	663.578770592262	2650.28597650265	4	MULTI	HCD	FTMS	0	0	0	-1	0	0	0	0	2				NaN	1	NaN	NaN	NaN	NaN	679	0	1	2448	3127
20140904-PurClathDigest-1ug-01	3130	32.544	10.476	4133300	0	NaN	1391400	0.36	-	-1		0	98	404.522950361561	1210.54702168488	3	MULTI	HCD	FTMS	0	0	0	-1	0	0	0	0	3				NaN	1	NaN	NaN	NaN	NaN	680	0	1	2448	3127
20140904-PurClathDigest-1ug-01	3131	32.547	20.519	195930	0	NaN	29824	0.37	-	-1		0	35	430.721815964159	859.429078995118	2	MULTI	HCD	FTMS	0	0	0	-1	0	0	0	0	4				NaN	1	NaN	NaN	NaN	NaN	681	0	1	2448	3127
20140904-PurClathDigest-1ug-01	3132	32.55	17.911	1724200	0	NaN	267620	0.37	-	-1		0	119	567.264725864852	1698.77234819476	3	MULTI	HCD	FTMS	0	0	0	-1	0	0	0	0	5				NaN	1	NaN	NaN	NaN	NaN	682	0	1	2448	3127
20140904-PurClathDigest-1ug-01	3133	32.553	27.314	680950	0	NaN	108460	0.37	-	-1		0	91	606.280483141791	1210.54641335038	2	MULTI	HCD	FTMS	0	0	0	-1	0	0	0	0	6				NaN	1	NaN	NaN	NaN	NaN	683	0	1	2448	3127
20140904-PurClathDigest-1ug-01	3134	32.556	25.581	1285900	0	NaN	159550	0.37	+	2865	LQSEPESIRK	10	95	396.2191308924	1185.6355632774	3	MULTI	HCD	FTMS	0	0	0	-1	0	0	0	0	7	Unmodified	_LQSEPESIRK_	P04973	84.1183776855469	1	NaN	NaN	NaN	NaN	684	0	1	2448	3127
20140904-PurClathDigest-1ug-01	3136	32.568	2.778	7531900	0	NaN	326320	0.39	-	-1		0	121	531.264776523596	1060.51500011399	2	MULTI	HCD	FTMS	0	0	0	-1	0	0	0	0	1				NaN	1	NaN	NaN	NaN	NaN	685	0	1	2449	3135
20140904-PurClathDigest-1ug-01	3137	32.571	7.051	8517000	0	NaN	2179000	0.35	-	-1		0	65	350.247270510137	698.479988087074	2	MULTI	HCD	FTMS	0	0	0	-1	0	0	0	0	2				NaN	1	NaN	NaN	NaN	NaN	686	0	1	2449	3135
20140904-PurClathDigest-1ug-01	3138	32.574	10.831	785610	0	NaN	68886	0.36	-	-1		0	82	884.434723575852	2650.28234132776	3	MULTI	HCD	FTMS	0	0	0	-1	0	0	0	0	3				NaN	1	NaN	NaN	NaN	NaN	687	0	1	2449	3135
20140904-PurClathDigest-1ug-01	3139	32.577	19.5	1648600	0	NaN	274900	0.37	+	4197	TELDSPR	7	71	409.205915594903	816.397278256605	2	MULTI	HCD	FTMS	0	0	0	-1	0	0	0	0	4	Unmodified	_TELDSPR_	E1BKN2	135.056701660156	1	NaN	NaN	NaN	NaN	688	0	1	2449	3135
20140904-PurClathDigest-1ug-01	3140	32.58	27.027	92501	0	NaN	20399	0.38	-	-1		0	27	632.822690905054	1263.63082887691	2	MULTI	HCD	FTMS	0	0	0	-1	0	0	0	0	5				NaN	1	NaN	NaN	NaN	NaN	689	0	1	2449	3135
20140904-PurClathDigest-1ug-01	3141	32.583	17.989	53724	0	NaN	8229.3	0.37	-	-1		0	19	1026.77499350696	4103.07086816144	4	MULTI	HCD	FTMS	0	0	0	-1	0	0	0	0	6				NaN	1	NaN	NaN	NaN	NaN	690	0	1	2449	3135
20140904-PurClathDigest-1ug-01	3142	32.586	38.62	457970	0	NaN	31746	0.39	-	-1		0	90	542.744770445233	1083.47498795727	2	MULTI	HCD	FTMS	0	0	0	-1	0	0	0	0	7				NaN	1	NaN	NaN	NaN	NaN	691	0	1	2449	3135
20140904-PurClathDigest-1ug-01	3144	32.598	10.819	1265000	0	NaN	380060	0.4	-	-1		0	47	570.809730009856	1139.60490708651	2	MULTI	HCD	FTMS	0	0	0	-1	0	0	0	0	1				NaN	1	NaN	NaN	NaN	NaN	692	0	1	2450	3143
20140904-PurClathDigest-1ug-01	3145	32.602	17.153	4832500	0	NaN	399620	0.35	-	-1		0	90	317.663297792061	633.312042650922	2	MULTI	HCD	FTMS	0	0	0	-1	0	0	0	0	2				NaN	1	NaN	NaN	NaN	NaN	693	0	1	2450	3143
20140904-PurClathDigest-1ug-01	3146	32.605	22.804	5974700	0	NaN	1025900	0.36	+	2141	KLLEGEETR	9	121	537.793108611051	1073.5716642889	2	MULTI	HCD	FTMS	0	0	0	-1	0	0	0	0	3	Unmodified	_KLLEGEETR_	F1MDZ2;O77788;Q08DH7;P02548	153.128799438477	1	NaN	NaN	NaN	NaN	694	0	1	2450	3143
20140904-PurClathDigest-1ug-01	3147	32.608	21.371	3634900	0	NaN	785470	0.36	+	3993	SQSWSR	6	88	375.679945463405	749.34533799361	2	MULTI	HCD	FTMS	0	0	0	-1	0	0	0	0	4	Unmodified	_SQSWSR_	F1MDZ2;O77788	114.899002075195	1	NaN	NaN	NaN	NaN	695	0	1	2450	3143
20140904-PurClathDigest-1ug-01	3148	32.611	16.685	18668000	0	NaN	3752500	0.36	-	-1		0	107	330.0282320553	1974.1257335322	6	MULTI	HCD	FTMS	0	0	0	-1	0	0	0	0	5				NaN	1	NaN	NaN	NaN	NaN	696	0	1	2450	3143
20140904-PurClathDigest-1ug-01	3149	32.614	12.909	1128100	0	NaN	59025	0.36	-	-1		0	101	527.659829333885	2633.26276433642	5	MULTI	HCD	FTMS	0	0	0	-1	0	0	0	0	6				NaN	1	NaN	NaN	NaN	NaN	697	0	1	2450	3143
20140904-PurClathDigest-1ug-01	3150	32.617	25.556	2229600	0	NaN	421320	0.37	-	-1		0	79	399.201973123798	796.389393314396	2	MULTI	HCD	FTMS	0	0	0	-1	0	0	0	0	7				NaN	1	NaN	NaN	NaN	NaN	698	0	1	2450	3143
20140904-PurClathDigest-1ug-01	3152	32.628	4.81	18031000	0	NaN	4883200	0.39	-	-1		0	78	407.19983826086	812.385123588519	2	MULTI	HCD	FTMS	0	0	0	-1	0	0	0	0	1				NaN	1	NaN	NaN	NaN	NaN	699	0	1	2451	3151
20140904-PurClathDigest-1ug-01	3153	32.632	7.31	2728200	0	NaN	615900	0.35	-	-1		0	58	358.864462734566	1073.5715588039	3	MULTI	HCD	FTMS	0	0	0	-1	0	0	0	0	2				NaN	1	NaN	NaN	NaN	NaN	700	0	1	2451	3151
20140904-PurClathDigest-1ug-01	3154	32.634	10.753	5066600	0	NaN	764790	0.35	-	-1		0	64	344.205266793779	686.395980654357	2	MULTI	HCD	FTMS	0	0	0	-1	0	0	0	0	3				NaN	1	NaN	NaN	NaN	NaN	701	0	1	2451	3151
20140904-PurClathDigest-1ug-01	3155	32.637	11.747	3090800	0	NaN	393240	0.35	+	2521	LEEKPTISDK	10	94	387.211462675454	1158.61255862656	3	MULTI	HCD	FTMS	0	0	0	-1	0	0	0	0	4	Unmodified	_LEEKPTISDK_	F1MEW3	64.6431732177734	1	NaN	NaN	NaN	NaN	702	0	1	2451	3151
20140904-PurClathDigest-1ug-01	3156	32.64	14.615	1906600	0	NaN	215950	0.36	-	-1		0	119	383.680989663761	1530.69485278864	4	MULTI	HCD	FTMS	0	0	0	-1	0	0	0	0	5				NaN	1	NaN	NaN	NaN	NaN	703	0	1	2451	3151
20140904-PurClathDigest-1ug-01	3157	32.643	27.307	2605500	0	NaN	339510	0.38	+	2522	LEEKPTISDK	10	133	580.313915611527	1158.61327828985	2	MULTI	HCD	FTMS	0	0	0	-1	0	0	0	0	6	Unmodified	_LEEKPTISDK_	F1MEW3	150.333999633789	1	NaN	NaN	NaN	NaN	704	0	1	2451	3151
20140904-PurClathDigest-1ug-01	3158	32.647	27.491	116520	0	NaN	26943	0.37	-	-1		0	26	332.692382098364	663.370211263527	2	MULTI	HCD	FTMS	0	0	0	-1	0	0	0	0	7				NaN	1	NaN	NaN	NaN	NaN	705	0	1	2451	3151
20140904-PurClathDigest-1ug-01	3160	32.658	12.426	9359300	0	NaN	2038200	0.39	-	-1		0	67	323.687123544761	645.359694156322	2	MULTI	HCD	FTMS	0	0	0	-1	0	0	0	0	1				NaN	1	NaN	NaN	NaN	NaN	706	0	1	2452	3159
20140904-PurClathDigest-1ug-01	3161	32.662	25.214	3561200	0	NaN	344700	0.37	+	1067	FAQEAEAAR	9	102	496.743364410643	991.472175888086	2	MULTI	HCD	FTMS	0	0	0	-1	0	0	0	0	2	Unmodified	_FAQEAEAAR_	F1MSQ6	169.30729675293	1	NaN	NaN	NaN	NaN	707	0	1	2452	3159
20140904-PurClathDigest-1ug-01	3162	32.665	25.239	60668	0	NaN	3862	0.38	-	-1		0	30	1014.04113934486	2026.06772575652	2	MULTI	HCD	FTMS	0	0	0	-1	0	0	0	0	3				NaN	1	NaN	NaN	NaN	NaN	708	0	1	2452	3159
20140904-PurClathDigest-1ug-01	3163	32.668	10.956	3322900	0	NaN	200310	0.36	-	-1		0	112	491.805895152671	3435.59033080249	7	MULTI	HCD	FTMS	0	0	0	-1	0	0	0	0	4				NaN	1	NaN	NaN	NaN	NaN	709	0	1	2452	3159
20140904-PurClathDigest-1ug-01	3164	32.671	32.1	72269	0	NaN	9818.2	0.38	-	-1		0	32	1221.64040895784	2441.26626498247	2	MULTI	HCD	FTMS	0	0	0	-1	0	0	0	0	5				NaN	1	NaN	NaN	NaN	NaN	710	0	1	2452	3159
20140904-PurClathDigest-1ug-01	3165	32.674	22.341	1119500	0	NaN	143430	0.37	-	-1		0	106	511.238570740073	1530.69388282042	3	MULTI	HCD	FTMS	0	0	0	-1	0	0	0	0	6				NaN	1	NaN	NaN	NaN	NaN	711	0	1	2452	3159
20140904-PurClathDigest-1ug-01	3166	32.677	23.384	681210	0	NaN	64234	0.37	-	-1		0	98	859.904473203401	3435.58878694721	4	MULTI	HCD	FTMS	0	0	0	-1	0	0	0	0	7				NaN	1	NaN	NaN	NaN	NaN	712	0	1	2452	3159
20140904-PurClathDigest-1ug-01	3168	32.689	10.855	711540	0	NaN	203500	0.37	-	-1		0	40	627.83099046152	1253.64742798984	2	MULTI	HCD	FTMS	0	0	0	-1	0	0	0	0	1				NaN	1	NaN	NaN	NaN	NaN	713	0	1	2453	3167
20140904-PurClathDigest-1ug-01	3169	32.692	11.269	648340	0	NaN	179950	0.36	-	-1		0	44	688.124327521899	3435.5852552765	5	MULTI	HCD	FTMS	0	0	0	-1	0	0	0	0	2				NaN	1	NaN	NaN	NaN	NaN	714	0	1	2453	3167
20140904-PurClathDigest-1ug-01	3170	32.695	30.355	843700	0	NaN	119950	0.38	+	579	DKALEQEDKVPEGK	14	116	793.407168803246	1584.79978467329	2	MULTI	HCD	FTMS	0	0	0	-1	0	0	0	0	3	Unmodified	_DKALEQEDKVPEGK_	G3MYP5	176.107696533203	1	NaN	NaN	NaN	NaN	715	0	1	2453	3167
20140904-PurClathDigest-1ug-01	3171	32.698	44.938	22008	0	NaN	2406.1	0.4	-	-1		0	18	1016.53818534281	2031.06181775241	2	MULTI	HCD	FTMS	0	0	0	-1	0	0	0	0	4				NaN	1	NaN	NaN	NaN	NaN	716	0	1	2453	3167
20140904-PurClathDigest-1ug-01	3172	32.702	36.096	1449600	0	NaN	64090	0.38	-	-1		0	142	562.613001369024	1684.81717470727	3	MULTI	HCD	FTMS	0	0	0	-1	0	0	0	0	5				NaN	1	NaN	NaN	NaN	NaN	717	0	1	2453	3167
20140904-PurClathDigest-1ug-01	3173	32.705	38.965	275940	0	NaN	41601	0.38	-	-1		0	41	352.861070247223	1055.56138134187	3	MULTI	HCD	FTMS	0	0	0	-1	0	0	0	0	6				NaN	1	NaN	NaN	NaN	NaN	718	0	1	2453	3167
20140904-PurClathDigest-1ug-01	3174	32.709	53.456	234990	0	NaN	12445	0.4	-	-1		0	93	1146.20470554057	3435.5922872219	3	MULTI	HCD	FTMS	0	0	0	-1	0	0	0	0	7				NaN	1	NaN	NaN	NaN	NaN	719	0	1	2453	3167
20140904-PurClathDigest-1ug-01	3176	32.721	0.314	205000000	0	NaN	66818000	0.36	+	3247	NNRPSEGPLQTR	12	102	684.851889415328	1367.68922589746	2	MULTI	HCD	FTMS	0	0	0	-1	0	0	0	0	1	Unmodified	_NNRPSEGPLQTR_	P49951;F1MPU0	184.170700073242	1	NaN	NaN	NaN	NaN	720	0	1	2454	3175
20140904-PurClathDigest-1ug-01	3177	32.724	0.274	219760000	0	NaN	16853000	0.35	+	3253	NNRPSEGPLQTR	12	122	456.903858272444	1367.68974541753	3	MULTI	HCD	FTMS	0	0	0	-1	0	0	0	0	2	Unmodified	_NNRPSEGPLQTR_	P49951;F1MPU0	162.18229675293	1	NaN	NaN	NaN	NaN	721	0	1	2454	3175
20140904-PurClathDigest-1ug-01	3178	32.726	7.085	3736400	0	NaN	446900	0.35	-	-1		0	116	529.273907612161	1056.53326229112	2	MULTI	HCD	FTMS	0	0	0	-1	0	0	0	0	3				NaN	1	NaN	NaN	NaN	NaN	722	0	1	2454	3175
20140904-PurClathDigest-1ug-01	3179	32.729	14.326	3893100	0	NaN	266590	0.36	-	-1		0	110	581.239817817846	1160.46508270249	2	MULTI	HCD	FTMS	0	0	0	-1	0	0	0	0	4				NaN	1	NaN	NaN	NaN	NaN	723	0	1	2454	3175
20140904-PurClathDigest-1ug-01	3180	32.732	44.127	1493700	0	NaN	385910	0.39	-	-1		0	109	504.768504013479	1007.52245509376	2	MULTI	HCD	FTMS	0	0	0	-1	0	0	0	0	5				NaN	1	NaN	NaN	NaN	NaN	724	0	1	2454	3175
20140904-PurClathDigest-1ug-01	3181	32.736	34.799	1799400	0	NaN	96121	0.38	+	2525	LEEKPTISDKEAMPK	15	152	577.965980778749	1730.87611293645	3	MULTI	HCD	FTMS	0	0	0	-1	0	0	0	0	6	Oxidation (M)	_LEEKPTISDKEAM(ox)PK_	F1MEW3	82.7133865356445	1	NaN	NaN	NaN	NaN	725	0	1	2454	3175
20140904-PurClathDigest-1ug-01	3182	32.739	36.158	1860000	0	NaN	101160	0.38	-	-1		0	114	336.847733823563	1007.52137207089	3	MULTI	HCD	FTMS	0	0	0	-1	0	0	0	0	7				NaN	1	NaN	NaN	NaN	NaN	726	0	1	2454	3175
20140904-PurClathDigest-1ug-01	3184	32.751	6.839	3120600	0	NaN	604740	0.38	-	-1		0	77	573.605956070971	3435.59207762622	6	MULTI	HCD	FTMS	0	0	0	-1	0	0	0	0	1				NaN	1	NaN	NaN	NaN	NaN	727	0	1	2455	3183
20140904-PurClathDigest-1ug-01	3185	32.754	9.961	3103900	0	NaN	179260	0.36	-	-1		0	131	623.935349347148	1868.78421864164	3	MULTI	HCD	FTMS	0	0	0	-1	0	0	0	0	2				NaN	1	NaN	NaN	NaN	NaN	728	0	1	2455	3183
20140904-PurClathDigest-1ug-01	3186	32.757	56.374	104680	0	NaN	50332	0.41	-	-1		0	22	887.982478741609	1773.95040455002	2	MULTI	HCD	FTMS	0	0	0	-1	0	0	0	0	3				NaN	1	NaN	NaN	NaN	NaN	729	0	1	2455	3183
20140904-PurClathDigest-1ug-01	3187	32.761	59.145	407230	0	NaN	40101	0.41	-	-1		0	121	935.398797170928	1868.78304140866	2	MULTI	HCD	FTMS	0	0	0	-1	0	0	0	0	4				NaN	1	NaN	NaN	NaN	NaN	730	0	1	2455	3183
20140904-PurClathDigest-1ug-01	3188	32.765	45.725	1491100	0	NaN	475380	0.38	+	29	AAVTDVQR	8	90	430.235487317195	858.456421701189	2	MULTI	HCD	FTMS	0	0	0	-1	0	0	0	0	5	Unmodified	_AAVTDVQR_	Q0P5A1	91.1551513671875	1	NaN	NaN	NaN	NaN	731	0	1	2455	3183
20140904-PurClathDigest-1ug-01	3189	32.768	31.628	1724800	0	NaN	75714	0.38	-	-1		0	131	468.203111550206	1868.78334033442	4	MULTI	HCD	FTMS	0	0	0	-1	0	0	0	0	6				NaN	1	NaN	NaN	NaN	NaN	732	0	1	2455	3183
20140904-PurClathDigest-1ug-01	3190	32.771	60.745	971520	0	NaN	89409	0.41	-	-1		0	139	866.445019588676	1730.87548624415	2	MULTI	HCD	FTMS	0	0	0	-1	0	0	0	0	7				NaN	1	NaN	NaN	NaN	NaN	733	0	1	2455	3183
20140904-PurClathDigest-1ug-01	3192	32.784	5.974	227270	0	NaN	52651	0.38	-	-1		0	23	912.800365132141	2735.37926599662	3	MULTI	HCD	FTMS	0	0	0	-1	0	0	0	0	1				NaN	1	NaN	NaN	NaN	NaN	734	0	1	2456	3191
20140904-PurClathDigest-1ug-01	3193	32.787	35.029	1252300	0	NaN	86490	0.36	-	-1		0	150	487.551078037392	1459.63140471238	3	MULTI	HCD	FTMS	0	0	0	-1	0	0	0	0	2				NaN	1	NaN	NaN	NaN	NaN	735	0	1	2456	3191
20140904-PurClathDigest-1ug-01	3194	32.79	52.666	36166	0	NaN	4034.9	0.4	-	-1		0	26	901.984858628669	1801.95516432414	2	MULTI	HCD	FTMS	0	0	0	-1	0	0	0	0	3				NaN	1	NaN	NaN	NaN	NaN	736	0	1	2456	3191
20140904-PurClathDigest-1ug-01	3195	32.794	91.098	152760	0	NaN	7124.5	0.44	-	-1		0	107	924.884117828665	1847.75368272413	2	MULTI	HCD	FTMS	0	0	0	-1	0	0	0	0	4				NaN	1	NaN	NaN	NaN	NaN	737	0	1	2456	3191
20140904-PurClathDigest-1ug-01	3196	32.798	73.801	710310	0	NaN	41808	0.42	-	-1		0	153	730.823010001187	1459.63146706917	2	MULTI	HCD	FTMS	0	0	0	-1	0	0	0	0	5				NaN	1	NaN	NaN	NaN	NaN	738	0	1	2456	3191
20140904-PurClathDigest-1ug-01	3197	32.802	62.106	562160	0	NaN	17924	0.41	+	3019	MHEVSFQDKEKEHLTR	16	133	508.249433942702	2028.96862990441	4	MULTI	HCD	FTMS	0	0	0	-1	0	0	0	0	6	Oxidation (M)	_M(ox)HEVSFQDKEKEHLTR_	F6RAG5	138.639801025391	1	NaN	NaN	NaN	NaN	739	0	1	2456	3191
20140904-PurClathDigest-1ug-01	3198	32.806	65.772	106990	0	NaN	7277.9	0.42	-	-1		0	65	1146.20470554057	3435.5922872219	3	MULTI	HCD	FTMS	0	0	0	-1	0	0	0	0	7				NaN	1	NaN	NaN	NaN	NaN	740	0	1	2456	3191
20140904-PurClathDigest-1ug-01	3200	32.818	20.414	2310000	0	NaN	287010	0.38	+	4618	VGSLDNAHHVPGGGNVK	17	144	553.285095720224	1656.83345776087	3	MULTI	HCD	FTMS	0	0	0	-1	0	0	0	0	1	Unmodified	_VGSLDNAHHVPGGGNVK_	F1MEW3	125.95539855957	1	NaN	NaN	NaN	NaN	741	0	1	2457	3199
20140904-PurClathDigest-1ug-01	3201	32.822	19.572	956290	0	NaN	58907	0.37	-	-1		0	105	531.264776523596	1060.51500011399	2	MULTI	HCD	FTMS	0	0	0	-1	0	0	0	0	2				NaN	1	NaN	NaN	NaN	NaN	742	0	1	2457	3199
20140904-PurClathDigest-1ug-01	3202	32.825	54.358	644920	0	NaN	38563	0.4	+	3828	SKEEAEALYHSK	12	130	696.343528044301	1390.6725031554	2	MULTI	HCD	FTMS	0	0	0	-1	0	0	0	0	3	Unmodified	_SKEEAEALYHSK_	CON__P35908	148.675796508789	1	NaN	NaN	NaN	NaN	743	0	1	2457	3199
20140904-PurClathDigest-1ug-01	3203	32.829	34.057	2495800	0	NaN	218230	0.38	+	4619	VGSLDNAHHVPGGGNVK	17	144	415.215841898621	1656.83426172808	4	MULTI	HCD	FTMS	0	0	0	-1	0	0	0	0	4	Unmodified	_VGSLDNAHHVPGGGNVK_	F1MEW3	77.5074310302734	1	NaN	NaN	NaN	NaN	744	0	1	2457	3199
20140904-PurClathDigest-1ug-01	3204	32.832	46.337	167490	0	NaN	16389	0.39	-	-1		0	67	616.925742824148	1847.75539907264	3	MULTI	HCD	FTMS	0	0	0	-1	0	0	0	0	5				NaN	1	NaN	NaN	NaN	NaN	745	0	1	2457	3199
20140904-PurClathDigest-1ug-01	3205	32.835	58.573	315710	0	NaN	42059	0.4	+	1025	EVTQLR	6	64	373.21388099754	744.41320906188	2	MULTI	HCD	FTMS	0	0	0	-1	0	0	0	0	6	Unmodified	_EVTQLR_	CON__P35527	83.7268981933594	1	NaN	NaN	NaN	NaN	746	0	1	2457	3199
20140904-PurClathDigest-1ug-01	3206	32.839	79.864	1411700	0	NaN	153770	0.42	+	4620	VGSLDNAHHVPGGGNVK	17	171	829.424410455932	1656.83426797866	2	MULTI	HCD	FTMS	0	0	0	-1	0	0	0	0	7	Unmodified	_VGSLDNAHHVPGGGNVK_	F1MEW3	251.778503417969	1	NaN	NaN	NaN	NaN	747	0	1	2457	3199
20140904-PurClathDigest-1ug-01	3208	32.852	4.053	9020100	0	NaN	2037200	0.37	+	2142	KLLEGEETR	9	76	537.793108611051	1073.5716642889	2	MULTI	HCD	FTMS	0	0	0	-1	0	0	0	0	1	Unmodified	_KLLEGEETR_	F1MDZ2;O77788;Q08DH7;P02548	140.233901977539	1	NaN	NaN	NaN	NaN	748	0	1	2458	3207
20140904-PurClathDigest-1ug-01	3209	32.855	6.07	5114900	0	NaN	592820	0.35	-	-1		0	136	629.052875935539	2512.18239787576	4	MULTI	HCD	FTMS	0	0	0	-1	0	0	0	0	2				NaN	1	NaN	NaN	NaN	NaN	749	0	1	2458	3207
20140904-PurClathDigest-1ug-01	3210	32.858	17.228	1175700	0	NaN	126700	0.37	-	-1		0	122	838.401671565544	2512.18318529683	3	MULTI	HCD	FTMS	0	0	0	-1	0	0	0	0	3				NaN	1	NaN	NaN	NaN	NaN	750	0	1	2458	3207
20140904-PurClathDigest-1ug-01	3211	32.861	20.122	2627800	0	NaN	197790	0.37	-	-1		0	170	503.444164998098	2512.18444265749	5	MULTI	HCD	FTMS	0	0	0	-1	0	0	0	0	4				NaN	1	NaN	NaN	NaN	NaN	751	0	1	2458	3207
20140904-PurClathDigest-1ug-01	3212	32.864	55.809	418050	0	NaN	55926	0.4	-	-1		0	103	570.809730009856	1139.60490708651	2	MULTI	HCD	FTMS	0	0	0	-1	0	0	0	0	5				NaN	1	NaN	NaN	NaN	NaN	752	0	1	2458	3207
20140904-PurClathDigest-1ug-01	3213	32.867	40.079	1033300	0	NaN	707990	0.39	-	-1		0	98	659.593727037773	2634.34580228469	4	MULTI	HCD	FTMS	0	0	0	-1	0	0	0	0	6				NaN	1	NaN	NaN	NaN	NaN	753	0	1	2458	3207
20140904-PurClathDigest-1ug-01	3214	32.871	38.554	52901	0	NaN	3898.3	0.39	-	-1		0	29	540.270991882939	1617.79114624902	3	MULTI	HCD	FTMS	0	0	0	-1	0	0	0	0	7				NaN	1	NaN	NaN	NaN	NaN	754	0	1	2458	3207
20140904-PurClathDigest-1ug-01	3216	32.883	19.628	319950	0	NaN	38962	0.38	+	2143	KLLEGEETR	9	52	358.864462734566	1073.5715588039	3	MULTI	HCD	FTMS	0	0	0	-1	0	0	0	0	1	Unmodified	_KLLEGEETR_	F1MDZ2;O77788;Q08DH7;P02548	57.245231628418	1	NaN	NaN	NaN	NaN	755	0	1	2459	3215
20140904-PurClathDigest-1ug-01	3217	32.887	40.831	161840	0	NaN	10521	0.37	-	-1		0	73	1257.10130440414	2512.18805587508	2	MULTI	HCD	FTMS	0	0	0	-1	0	0	0	0	2				NaN	1	NaN	NaN	NaN	NaN	756	0	1	2459	3215
20140904-PurClathDigest-1ug-01	3218	32.89	62.452	1469000	0	NaN	217210	0.41	+	5044	YLQMAR	6	87	399.201973123798	796.389393314396	2	MULTI	HCD	FTMS	0	0	0	-1	0	0	0	0	3	Oxidation (M)	_YLQM(ox)AR_	P49951;F1MPU0	91.7356185913086	1	NaN	NaN	NaN	NaN	757	0	1	2459	3215
20140904-PurClathDigest-1ug-01	3219	32.893	70.956	536760	0	NaN	54689	0.42	-	-1		0	134	783.352111784581	1564.68967063596	2	MULTI	HCD	FTMS	0	0	0	-1	0	0	0	0	4				NaN	1	NaN	NaN	NaN	NaN	758	0	1	2459	3215
20140904-PurClathDigest-1ug-01	3220	32.897	44.785	58485	0	NaN	5830.3	0.39	-	-1		0	30	520.262013687456	1557.76421166257	3	MULTI	HCD	FTMS	0	0	0	-1	0	0	0	0	5				NaN	1	NaN	NaN	NaN	NaN	759	0	1	2459	3215
20140904-PurClathDigest-1ug-01	3221	32.901	52.078	181980	0	NaN	23460	0.4	-	-1		0	76	710.021885587208	2127.04382736182	3	MULTI	HCD	FTMS	0	0	0	-1	0	0	0	0	6				NaN	1	NaN	NaN	NaN	NaN	760	0	1	2459	3215
20140904-PurClathDigest-1ug-01	3222	32.905	87.895	719420	0	NaN	51678	0.44	-	-1		0	173	715.820715486834	1429.62687804047	2	MULTI	HCD	FTMS	0	0	0	-1	0	0	0	0	7				NaN	1	NaN	NaN	NaN	NaN	761	0	1	2459	3215
20140904-PurClathDigest-1ug-01	3224	32.917	1.718	13592000	0	NaN	3185600	0.36	-	-1		0	36	332.692382098364	663.370211263527	2	MULTI	HCD	FTMS	0	0	0	-1	0	0	0	0	1				NaN	1	NaN	NaN	NaN	NaN	762	0	1	2460	3223
20140904-PurClathDigest-1ug-01	3225	32.921	4.373	11962000	0	NaN	2821300	0.35	-	-1		0	42	323.687123544761	645.359694156322	2	MULTI	HCD	FTMS	0	0	0	-1	0	0	0	0	2				NaN	1	NaN	NaN	NaN	NaN	763	0	1	2460	3223
20140904-PurClathDigest-1ug-01	3226	32.923	12.773	159980	0	NaN	15611	0.36	-	-1		0	36	560.01657138906	2236.03717968984	4	MULTI	HCD	FTMS	0	0	0	-1	0	0	0	0	3				NaN	1	NaN	NaN	NaN	NaN	764	0	1	2460	3223
20140904-PurClathDigest-1ug-01	3227	32.926	16.244	69498	0	NaN	5061.7	0.36	-	-1		0	23	588.287229164658	2349.11981079223	4	MULTI	HCD	FTMS	0	0	0	-1	0	0	0	0	4				NaN	1	NaN	NaN	NaN	NaN	765	0	1	2460	3223
20140904-PurClathDigest-1ug-01	3228	32.929	30.982	176980	0	NaN	10125	0.38	-	-1		0	65	522.570512268791	1564.68970740657	3	MULTI	HCD	FTMS	0	0	0	-1	0	0	0	0	5				NaN	1	NaN	NaN	NaN	NaN	766	0	1	2460	3223
20140904-PurClathDigest-1ug-01	3229	32.933	31.555	1347200	0	NaN	152110	0.37	+	4552	VEEVGGKEEGGLK	13	103	444.233626871232	1329.6790512139	3	MULTI	HCD	FTMS	0	0	0	-1	0	0	0	0	6	Unmodified	_VEEVGGKEEGGLK_	F1MDZ2;O77788	113.004600524902	1	NaN	NaN	NaN	NaN	767	0	1	2460	3223
20140904-PurClathDigest-1ug-01	3230	32.936	18.546	875610	0	NaN	52257	0.37	-	-1		0	94	491.805895152671	3435.59033080249	7	MULTI	HCD	FTMS	0	0	0	-1	0	0	0	0	7				NaN	1	NaN	NaN	NaN	NaN	768	0	1	2460	3223
20140904-PurClathDigest-1ug-01	3232	32.947	22.665	2272100	0	NaN	122840	0.4	-	-1		0	122	405.225903419339	1616.87450781096	4	MULTI	HCD	FTMS	0	0	0	-1	0	0	0	0	1				NaN	1	NaN	NaN	NaN	NaN	769	0	1	2461	3231
20140904-PurClathDigest-1ug-01	3233	32.951	43.163	505940	0	NaN	43603	0.39	-	-1		0	113	589.558939989587	1765.65499056896	3	MULTI	HCD	FTMS	0	0	0	-1	0	0	0	0	2				NaN	1	NaN	NaN	NaN	NaN	770	0	1	2461	3231
20140904-PurClathDigest-1ug-01	3234	32.954	32.498	3059800	0	NaN	351890	0.38	+	274	ALEQEDKVPEGK	12	142	448.233312306074	1341.67810751842	3	MULTI	HCD	FTMS	0	0	0	-1	0	0	0	0	3	Unmodified	_ALEQEDKVPEGK_	G3MYP5	92.4325790405273	1	NaN	NaN	NaN	NaN	771	0	1	2461	3231
20140904-PurClathDigest-1ug-01	3235	32.958	48.609	1914200	0	NaN	275220	0.4	+	275	ALEQEDKVPEGK	12	135	671.846749603063	1341.67894627293	2	MULTI	HCD	FTMS	0	0	0	-1	0	0	0	0	4	Unmodified	_ALEQEDKVPEGK_	G3MYP5	112.082801818848	1	NaN	NaN	NaN	NaN	772	0	1	2461	3231
20140904-PurClathDigest-1ug-01	3236	32.961	47.399	1789900	0	NaN	436660	0.39	-	-1		0	84	353.200269261002	704.385985588805	2	MULTI	HCD	FTMS	0	0	0	-1	0	0	0	0	5				NaN	1	NaN	NaN	NaN	NaN	773	0	1	2461	3231
20140904-PurClathDigest-1ug-01	3237	32.965	28.612	534670	0	NaN	44926	0.37	-	-1		0	81	688.124327521899	3435.5852552765	5	MULTI	HCD	FTMS	0	0	0	-1	0	0	0	0	6				NaN	1	NaN	NaN	NaN	NaN	774	0	1	2461	3231
20140904-PurClathDigest-1ug-01	3238	32.968	60.178	1287100	0	NaN	233360	0.41	+	3857	SLEETGSPATAK	12	132	595.79871485333	1189.58287677346	2	MULTI	HCD	FTMS	0	0	0	-1	0	0	0	0	7	Unmodified	_SLEETGSPATAK_	F1MEW3	114.999000549316	1	NaN	NaN	NaN	NaN	775	0	1	2461	3231
20140904-PurClathDigest-1ug-01	3240	32.98	3.101	17230000	0	NaN	5651900	0.38	+	3248	NNRPSEGPLQTR	12	109	684.851889415328	1367.68922589746	2	MULTI	HCD	FTMS	0	0	0	-1	0	0	0	0	1	Unmodified	_NNRPSEGPLQTR_	P49951;F1MPU0	157.971603393555	1	NaN	NaN	NaN	NaN	776	0	1	2462	3239
20140904-PurClathDigest-1ug-01	3241	32.983	2.411	23295000	0	NaN	1884500	0.35	+	3254	NNRPSEGPLQTR	12	112	456.903858272444	1367.68974541753	3	MULTI	HCD	FTMS	0	0	0	-1	0	0	0	0	2	Unmodified	_NNRPSEGPLQTR_	P49951;F1MPU0	185.580902099609	1	NaN	NaN	NaN	NaN	777	0	1	2462	3239
20140904-PurClathDigest-1ug-01	3242	32.986	14.108	2055200	0	NaN	117570	0.36	-	-1		0	115	539.965225469406	1616.87384700842	3	MULTI	HCD	FTMS	0	0	0	-1	0	0	0	0	3				NaN	1	NaN	NaN	NaN	NaN	778	0	1	2462	3239
20140904-PurClathDigest-1ug-01	3243	32.989	44.769	675590	0	NaN	165170	0.39	-	-1		0	120	883.835095204281	1765.65563747536	2	MULTI	HCD	FTMS	0	0	0	-1	0	0	0	0	4				NaN	1	NaN	NaN	NaN	NaN	779	0	1	2462	3239
20140904-PurClathDigest-1ug-01	3244	32.993	45.124	1078000	0	NaN	176730	0.39	+	641	DQASEGKDEDLEPK	14	137	780.855098579072	1559.69564422494	2	MULTI	HCD	FTMS	0	0	0	-1	0	0	0	0	5	Unmodified	_DQASEGKDEDLEPK_	G3MYP5	144.311706542969	1	NaN	NaN	NaN	NaN	780	0	1	2462	3239
20140904-PurClathDigest-1ug-01	3245	32.996	32.89	1447300	0	NaN	84770	0.38	-	-1		0	153	562.941902755559	1685.80387886688	3	MULTI	HCD	FTMS	0	0	0	-1	0	0	0	0	6				NaN	1	NaN	NaN	NaN	NaN	781	0	1	2462	3239
20140904-PurClathDigest-1ug-01	3246	32.999	37.259	1658400	0	NaN	103180	0.39	-	-1		0	172	756.145863512187	3020.55434818235	4	MULTI	HCD	FTMS	0	0	0	-1	0	0	0	0	7				NaN	1	NaN	NaN	NaN	NaN	782	0	1	2462	3239
20140904-PurClathDigest-1ug-01	3248	33.011	5.128	4878700	0	NaN	291230	0.39	-	-1		0	114	623.935349347148	1868.78421864164	3	MULTI	HCD	FTMS	0	0	0	-1	0	0	0	0	1				NaN	1	NaN	NaN	NaN	NaN	783	0	1	2463	3247
20140904-PurClathDigest-1ug-01	3249	33.015	9.267	3252600	0	NaN	153280	0.36	-	-1		0	109	468.203111550206	1868.78334033442	4	MULTI	HCD	FTMS	0	0	0	-1	0	0	0	0	2				NaN	1	NaN	NaN	NaN	NaN	784	0	1	2463	3247
20140904-PurClathDigest-1ug-01	3250	33.017	14.134	3246300	0	NaN	159870	0.36	-	-1		0	154	605.118073543742	3020.55398538571	5	MULTI	HCD	FTMS	0	0	0	-1	0	0	0	0	3				NaN	1	NaN	NaN	NaN	NaN	785	0	1	2463	3247
20140904-PurClathDigest-1ug-01	3251	33.02	28.735	2305300	0	NaN	228870	0.37	+	2449	LDASESLRK	9	107	509.780207584132	1017.54586223506	2	MULTI	HCD	FTMS	0	0	0	-1	0	0	0	0	4	Unmodified	_LDASESLRK_	P49951;F1MPU0	156.614898681641	1	NaN	NaN	NaN	NaN	786	0	1	2463	3247
20140904-PurClathDigest-1ug-01	3252	33.024	18.089	602160	0	NaN	81103	0.36	-	-1		0	70	442.421180657391	1765.65561676317	4	MULTI	HCD	FTMS	0	0	0	-1	0	0	0	0	5				NaN	1	NaN	NaN	NaN	NaN	787	0	1	2463	3247
20140904-PurClathDigest-1ug-01	3253	33.027	39.417	297140	0	NaN	32935	0.39	-	-1		0	77	935.398797170928	1868.78304140866	2	MULTI	HCD	FTMS	0	0	0	-1	0	0	0	0	6				NaN	1	NaN	NaN	NaN	NaN	788	0	1	2463	3247
20140904-PurClathDigest-1ug-01	3254	33.03	33.427	3048300	0	NaN	252920	0.37	+	3582	RNIVVK	6	109	365.234487134589	728.454421335978	2	MULTI	HCD	FTMS	0	0	0	-1	0	0	0	0	7	Deamidation (NQ)	_RN(de)IVVK_	Q28115	19.9493408203125	1	NaN	NaN	NaN	NaN	789	0	1	2463	3247
20140904-PurClathDigest-1ug-01	3256	33.042	3.469	5984600	0	NaN	1406000	0.38	-	-1		0	41	327.178778311343	652.343003689486	2	MULTI	HCD	FTMS	0	0	0	-1	0	0	0	0	1				NaN	1	NaN	NaN	NaN	NaN	790	0	1	2464	3255
20140904-PurClathDigest-1ug-01	3257	33.045	12.018	410210	0	NaN	91304	0.35	-	-1		0	33	318.173813501447	634.333074069694	2	MULTI	HCD	FTMS	0	0	0	-1	0	0	0	0	2				NaN	1	NaN	NaN	NaN	NaN	791	0	1	2464	3255
20140904-PurClathDigest-1ug-01	3258	33.048	23.669	2437100	0	NaN	214750	0.37	+	1150	FSSSSGYGGGSSR	13	107	618.267615479588	1234.52067802598	2	MULTI	HCD	FTMS	0	0	0	-1	0	0	0	0	3	Unmodified	_FSSSSGYGGGSSR_	CON__P35527	181.686096191406	1	NaN	NaN	NaN	NaN	792	0	1	2464	3255
20140904-PurClathDigest-1ug-01	3259	33.051	17.867	2663800	0	NaN	152940	0.36	+	4645	VHLENMGSHDIVDGNHR	17	138	487.228846791356	1944.88628129903	4	MULTI	HCD	FTMS	0	0	0	-1	0	0	0	0	4	Oxidation (M)	_VHLENM(ox)GSHDIVDGNHR_	F1MYC9;E1BMN5;F1MKE9	152.82080078125	1	NaN	NaN	NaN	NaN	793	0	1	2464	3255
20140904-PurClathDigest-1ug-01	3260	33.054	24.852	1430000	0	NaN	118280	0.37	+	4646	VHLENMGSHDIVDGNHR	17	121	649.302986215834	1944.8871292477	3	MULTI	HCD	FTMS	0	0	0	-1	0	0	0	0	5	Oxidation (M)	_VHLENM(ox)GSHDIVDGNHR_	F1MYC9;E1BMN5;F1MKE9	102.788696289063	1	NaN	NaN	NaN	NaN	794	0	1	2464	3255
20140904-PurClathDigest-1ug-01	3261	33.058	30.052	1548300	0	NaN	283470	0.38	+	643	DQASEGKDEDLEPK	14	146	520.905908826526	1559.69589707978	3	MULTI	HCD	FTMS	0	0	0	-1	0	0	0	0	6	Unmodified	_DQASEGKDEDLEPK_	G3MYP5	68.1127395629883	1	NaN	NaN	NaN	NaN	795	0	1	2464	3255
20140904-PurClathDigest-1ug-01	3262	33.061	38.644	7730800	0	NaN	1308300	0.38	-	-1		0	137	309.168478281099	616.322403628997	2	MULTI	HCD	FTMS	0	0	0	-1	0	0	0	0	7				NaN	1	NaN	NaN	NaN	NaN	796	0	1	2464	3255
20140904-PurClathDigest-1ug-01	3264	33.073	12.096	2846000	0	NaN	334890	0.39	-	-1		0	151	576.632224625896	1726.87484447789	3	MULTI	HCD	FTMS	0	0	0	-1	0	0	0	0	1				NaN	1	NaN	NaN	NaN	NaN	797	0	1	2465	3263
20140904-PurClathDigest-1ug-01	3265	33.076	35.06	1572600	0	NaN	131870	0.38	-	-1		0	153	504.758815619269	1007.50307830534	2	MULTI	HCD	FTMS	0	0	0	-1	0	0	0	0	2				NaN	1	NaN	NaN	NaN	NaN	798	0	1	2465	3263
20140904-PurClathDigest-1ug-01	3266	33.079	19.789	2266600	0	NaN	241160	0.37	-	-1		0	126	499.212186191773	1992.81963890069	4	MULTI	HCD	FTMS	0	0	0	-1	0	0	0	0	3				NaN	1	NaN	NaN	NaN	NaN	799	0	1	2465	3263
20140904-PurClathDigest-1ug-01	3267	33.083	60.029	688640	0	NaN	151770	0.41	-	-1		0	110	751.305926998994	1500.59730106479	2	MULTI	HCD	FTMS	0	0	0	-1	0	0	0	0	4				NaN	1	NaN	NaN	NaN	NaN	800	0	1	2465	3263
20140904-PurClathDigest-1ug-01	3268	33.086	69.57	261640	0	NaN	47434	0.42	+	1208	GGSGGGGSISGGGYGSGGGSGGR	23	94	871.377851782607	1740.74115063201	2	MULTI	HCD	FTMS	0	0	0	-1	0	0	0	0	5	Unmodified	_GGSGGGGSISGGGYGSGGGSGGR_	CON__P35908	127.24649810791	1	NaN	NaN	NaN	NaN	801	0	1	2465	3263
20140904-PurClathDigest-1ug-01	3269	33.09	39.503	1239600	0	NaN	128220	0.38	-	-1		0	100	371.830795078584	1112.47055583595	3	MULTI	HCD	FTMS	0	0	0	-1	0	0	0	0	6				NaN	1	NaN	NaN	NaN	NaN	802	0	1	2465	3263
20140904-PurClathDigest-1ug-01	3270	33.094	66.937	367970	0	NaN	22934	0.41	-	-1		0	97	542.744882857192	1083.47521278118	2	MULTI	HCD	FTMS	0	0	0	-1	0	0	0	0	7				NaN	1	NaN	NaN	NaN	NaN	803	0	1	2465	3263
20140904-PurClathDigest-1ug-01	3272	33.106	2.775	23820000	0	NaN	3119900	0.38	+	3124	NKYEDEINKR	10	129	436.889649549821	1307.64711924966	3	MULTI	HCD	FTMS	0	0	0	-1	0	0	0	0	1	Unmodified	_NKYEDEINKR_	CON__P04259;CON__P05787;CON__P13647;M0QVZ6;CON__H-INV:HIT000016045;CON__P02538;CON__Q922U2;F1MUY2;M0QVY0;Q5XQN5;A5D7M6;CON__P04264;CON__P48668;CON__Q5XQN5;CON__Q6IFZ6;CON__Q8VED5	184.587203979492	1	NaN	NaN	NaN	NaN	804	0	1	2466	3271
20140904-PurClathDigest-1ug-01	3273	33.109	12.018	1926500	0	NaN	343570	0.36	-	-1		0	101	665.279755271207	1992.81743641382	3	MULTI	HCD	FTMS	0	0	0	-1	0	0	0	0	2				NaN	1	NaN	NaN	NaN	NaN	805	0	1	2466	3271
20140904-PurClathDigest-1ug-01	3274	33.112	22.122	4482100	0	NaN	889050	0.36	-	-1		0	64	336.711066973057	671.407581012915	2	MULTI	HCD	FTMS	0	0	0	-1	0	0	0	0	3				NaN	1	NaN	NaN	NaN	NaN	806	0	1	2466	3271
20140904-PurClathDigest-1ug-01	3275	33.115	14.962	1645200	0	NaN	125370	0.36	-	-1		0	139	629.065966223457	2512.23475902743	4	MULTI	HCD	FTMS	0	0	0	-1	0	0	0	0	4				NaN	1	NaN	NaN	NaN	NaN	807	0	1	2466	3271
20140904-PurClathDigest-1ug-01	3276	33.118	36.429	480210	0	NaN	51906	0.39	-	-1		0	124	864.444106524508	1726.87366011582	2	MULTI	HCD	FTMS	0	0	0	-1	0	0	0	0	5				NaN	1	NaN	NaN	NaN	NaN	808	0	1	2466	3271
20140904-PurClathDigest-1ug-01	3277	33.122	27.905	860240	0	NaN	40358	0.38	-	-1		0	140	838.418965841488	2512.23506812466	3	MULTI	HCD	FTMS	0	0	0	-1	0	0	0	0	6				NaN	1	NaN	NaN	NaN	NaN	809	0	1	2466	3271
20140904-PurClathDigest-1ug-01	3278	33.125	44.043	340840	0	NaN	77709	0.39	-	-1		0	81	997.416824037315	1992.81909514143	2	MULTI	HCD	FTMS	0	0	0	-1	0	0	0	0	7				NaN	1	NaN	NaN	NaN	NaN	810	0	1	2466	3271
20140904-PurClathDigest-1ug-01	3280	33.137	14.123	1343800	0	NaN	301570	0.37	-	-1		0	42	376.724193677619	751.433834422038	2	MULTI	HCD	FTMS	0	0	0	-1	0	0	0	0	1				NaN	1	NaN	NaN	NaN	NaN	811	0	1	2467	3279
20140904-PurClathDigest-1ug-01	3281	33.14	38.302	454390	0	NaN	40263	0.38	-	-1		0	119	783.352111784581	1564.68967063596	2	MULTI	HCD	FTMS	0	0	0	-1	0	0	0	0	2				NaN	1	NaN	NaN	NaN	NaN	812	0	1	2467	3279
20140904-PurClathDigest-1ug-01	3282	33.144	36.562	1481000	0	NaN	99538	0.38	+	67	AESPVKEEVPAKPVK	15	128	536.638321106143	1606.89313391863	3	MULTI	HCD	FTMS	0	0	0	-1	0	0	0	0	3	Unmodified	_AESPVKEEVPAKPVK_	F1MDZ2;O77788	75.5458068847656	1	NaN	NaN	NaN	NaN	813	0	1	2467	3279
20140904-PurClathDigest-1ug-01	3283	33.147	30.719	710650	0	NaN	92985	0.38	-	-1		0	115	607.577484751003	2426.28083313761	4	MULTI	HCD	FTMS	0	0	0	-1	0	0	0	0	4				NaN	1	NaN	NaN	NaN	NaN	814	0	1	2467	3279
20140904-PurClathDigest-1ug-01	3284	33.15	58.755	61589	0	NaN	7072.4	0.41	-	-1		0	28	533.761521845386	1065.50849075757	2	MULTI	HCD	FTMS	0	0	0	-1	0	0	0	0	5				NaN	1	NaN	NaN	NaN	NaN	815	0	1	2467	3279
20140904-PurClathDigest-1ug-01	3285	33.154	57.52	619420	0	NaN	44016	0.4	-	-1		0	106	557.244198449888	1112.47384396658	2	MULTI	HCD	FTMS	0	0	0	-1	0	0	0	0	6				NaN	1	NaN	NaN	NaN	NaN	816	0	1	2467	3279
20140904-PurClathDigest-1ug-01	3286	33.158	35.81	804220	0	NaN	87242	0.38	-	-1		0	117	432.947563899773	1727.76114973269	4	MULTI	HCD	FTMS	0	0	0	-1	0	0	0	0	7				NaN	1	NaN	NaN	NaN	NaN	817	0	1	2467	3279
20140904-PurClathDigest-1ug-01	3288	33.169	6.277	9685400	0	NaN	1465300	0.38	-	-1		0	89	507.734734170735	1013.45491540827	2	MULTI	HCD	FTMS	0	0	0	-1	0	0	0	0	1				NaN	1	NaN	NaN	NaN	NaN	818	0	1	2468	3287
20140904-PurClathDigest-1ug-01	3289	33.173	11.819	3738600	0	NaN	409110	0.36	-	-1		0	89	621.807234185809	1241.59991543842	2	MULTI	HCD	FTMS	0	0	0	-1	0	0	0	0	2				NaN	1	NaN	NaN	NaN	NaN	819	0	1	2468	3287
20140904-PurClathDigest-1ug-01	3290	33.176	23.565	1360100	0	NaN	314710	0.36	-	-1		0	62	332.692382098364	663.370211263527	2	MULTI	HCD	FTMS	0	0	0	-1	0	0	0	0	3				NaN	1	NaN	NaN	NaN	NaN	820	0	1	2468	3287
20140904-PurClathDigest-1ug-01	3291	33.179	37.783	1941900	0	NaN	432110	0.38	+	728	EAEGLPDRTEAR	12	129	672.330823722797	1342.64709451239	2	MULTI	HCD	FTMS	0	0	0	-1	0	0	0	0	4	Unmodified	_EAEGLPDRTEAR_	F1N3M8;G3MYP5	177.283996582031	1	NaN	NaN	NaN	NaN	821	0	1	2468	3287
20140904-PurClathDigest-1ug-01	3292	33.182	25.183	745740	0	NaN	125770	0.37	+	729	EAEGLPDRTEAR	12	66	448.556569038671	1342.64787771621	3	MULTI	HCD	FTMS	0	0	0	-1	0	0	0	0	5	Unmodified	_EAEGLPDRTEAR_	F1N3M8;G3MYP5	45.707389831543	1	NaN	NaN	NaN	NaN	822	0	1	2468	3287
20140904-PurClathDigest-1ug-01	3293	33.185	48.26	974550	0	NaN	137270	0.4	-	-1		0	129	529.215406185455	1056.41625943771	2	MULTI	HCD	FTMS	0	0	0	-1	0	0	0	0	6				NaN	1	NaN	NaN	NaN	NaN	823	0	1	2468	3287
20140904-PurClathDigest-1ug-01	3294	33.189	35.417	3143300	0	NaN	304870	0.38	+	414	ASGPIDHYR	9	108	339.169626193866	1014.4870491818	3	MULTI	HCD	FTMS	0	0	0	-1	0	0	0	0	7	Unmodified	_ASGPIDHYR_	E1BKN2	118.323303222656	1	NaN	NaN	NaN	NaN	824	0	1	2468	3287
20140904-PurClathDigest-1ug-01	3296	33.201	21.86	5709400	0	NaN	1284600	0.39	+	2880	LRDDTEAAIR	10	125	580.307063425619	1158.59957391804	2	MULTI	HCD	FTMS	0	0	0	-1	0	0	0	0	1	Unmodified	_LRDDTEAAIR_	F1MDZ2;O77788	179.789001464844	1	NaN	NaN	NaN	NaN	825	0	1	2469	3295
20140904-PurClathDigest-1ug-01	3297	33.204	23.043	2458000	0	NaN	627330	0.36	-	-1		0	61	353.200269261002	704.385985588805	2	MULTI	HCD	FTMS	0	0	0	-1	0	0	0	0	2				NaN	1	NaN	NaN	NaN	NaN	826	0	1	2469	3295
20140904-PurClathDigest-1ug-01	3298	33.208	28.451	3427100	0	NaN	334560	0.37	+	2504	LEALDANSRK	10	118	558.804359936177	1115.59416693915	2	MULTI	HCD	FTMS	0	0	0	-1	0	0	0	0	3	Unmodified	_LEALDANSRK_	P04973	157.228302001953	1	NaN	NaN	NaN	NaN	827	0	1	2469	3295
20140904-PurClathDigest-1ug-01	3299	33.211	24.411	3414000	0	NaN	417710	0.37	+	2505	LEALDANSRK	10	103	372.871747409677	1115.59341282923	3	MULTI	HCD	FTMS	0	0	0	-1	0	0	0	0	4	Unmodified	_LEALDANSRK_	P04973	108.831497192383	1	NaN	NaN	NaN	NaN	828	0	1	2469	3295
20140904-PurClathDigest-1ug-01	3300	33.214	22.057	1574900	0	NaN	116600	0.37	-	-1		0	139	587.585720007123	2346.31377416209	4	MULTI	HCD	FTMS	0	0	0	-1	0	0	0	0	5				NaN	1	NaN	NaN	NaN	NaN	829	0	1	2469	3295
20140904-PurClathDigest-1ug-01	3301	33.217	24.271	401510	0	NaN	18710	0.37	-	-1		0	92	583.933206872783	1748.77779121855	3	MULTI	HCD	FTMS	0	0	0	-1	0	0	0	0	6				NaN	1	NaN	NaN	NaN	NaN	830	0	1	2469	3295
20140904-PurClathDigest-1ug-01	3302	33.22	45.08	1271100	0	NaN	48134	0.39	-	-1		0	155	495.566890486048	1483.67884205834	3	MULTI	HCD	FTMS	0	0	0	-1	0	0	0	0	7				NaN	1	NaN	NaN	NaN	NaN	831	0	1	2469	3295
20140904-PurClathDigest-1ug-01	3304	33.232	7.888	3216900	0	NaN	589310	0.38	+	642	DQASEGKDEDLEPK	14	120	780.855098579072	1559.69564422494	2	MULTI	HCD	FTMS	0	0	0	-1	0	0	0	0	1	Unmodified	_DQASEGKDEDLEPK_	G3MYP5	144.311706542969	1	NaN	NaN	NaN	NaN	832	0	1	2470	3303
20140904-PurClathDigest-1ug-01	3305	33.235	5.056	11543000	0	NaN	1450200	0.35	+	2881	LRDDTEAAIR	10	109	387.207030144019	1158.59926103226	3	MULTI	HCD	FTMS	0	0	0	-1	0	0	0	0	2	Unmodified	_LRDDTEAAIR_	F1MDZ2;O77788	112.242897033691	1	NaN	NaN	NaN	NaN	833	0	1	2470	3303
20140904-PurClathDigest-1ug-01	3306	33.238	11.216	4435800	0	NaN	1337700	0.36	+	3249	NNRPSEGPLQTR	12	105	684.851889415328	1367.68922589746	2	MULTI	HCD	FTMS	0	0	0	-1	0	0	0	0	3	Unmodified	_NNRPSEGPLQTR_	P49951;F1MPU0	153.747802734375	1	NaN	NaN	NaN	NaN	834	0	1	2470	3303
20140904-PurClathDigest-1ug-01	3307	33.241	8.436	4967700	0	NaN	404810	0.35	+	3255	NNRPSEGPLQTR	12	110	456.903858272444	1367.68974541753	3	MULTI	HCD	FTMS	0	0	0	-1	0	0	0	0	4	Unmodified	_NNRPSEGPLQTR_	P49951;F1MPU0	142.687805175781	1	NaN	NaN	NaN	NaN	835	0	1	2470	3303
20140904-PurClathDigest-1ug-01	3308	33.244	31.909	607140	0	NaN	124630	0.38	+	3858	SLEETGSPATAK	12	80	595.79871485333	1189.58287677346	2	MULTI	HCD	FTMS	0	0	0	-1	0	0	0	0	5	Unmodified	_SLEETGSPATAK_	F1MEW3	106.094497680664	1	NaN	NaN	NaN	NaN	836	0	1	2470	3303
20140904-PurClathDigest-1ug-01	3309	33.247	24.044	5353500	0	NaN	290970	0.37	-	-1		0	190	584.604822372827	1750.79263771868	3	MULTI	HCD	FTMS	0	0	0	-1	0	0	0	0	6				NaN	1	NaN	NaN	NaN	NaN	837	0	1	2470	3303
20140904-PurClathDigest-1ug-01	3310	33.251	25.226	1849700	0	NaN	80180	0.39	-	-1		0	156	470.270376122425	2346.31549827912	5	MULTI	HCD	FTMS	0	0	0	-1	0	0	0	0	7				NaN	1	NaN	NaN	NaN	NaN	838	0	1	2470	3303
20140904-PurClathDigest-1ug-01	3312	33.262	14.062	1643000	0	NaN	197510	0.4	-	-1		0	115	876.403986601855	1750.79342027051	2	MULTI	HCD	FTMS	0	0	0	-1	0	0	0	0	1				NaN	1	NaN	NaN	NaN	NaN	839	0	1	2471	3311
20140904-PurClathDigest-1ug-01	3313	33.266	11.439	9460800	0	NaN	1233900	0.36	+	3707	SAKEEIAEYRR	11	130	451.237105579721	1350.68948733936	3	MULTI	HCD	FTMS	0	0	0	-1	0	0	0	0	2	Unmodified	_SAKEEIAEYRR_	F1MDZ2;O77788	130.962905883789	1	NaN	NaN	NaN	NaN	840	0	1	2471	3311
20140904-PurClathDigest-1ug-01	3314	33.269	18.324	2852400	0	NaN	427920	0.36	+	2892	LRSEIDNVK	9	110	537.302399384285	1072.59024583537	2	MULTI	HCD	FTMS	0	0	0	-1	0	0	0	0	3	Unmodified	_LRSEIDNVK_	M0QVZ6;CON__Q922U2;Q5XQN5;A5D7M6;CON__P04264;CON__Q5XQN5	92.0205764770508	1	NaN	NaN	NaN	NaN	841	0	1	2471	3311
20140904-PurClathDigest-1ug-01	3315	33.272	17.862	5359100	0	NaN	438500	0.36	+	415	ASGPIDHYR	9	133	508.249158787931	1014.48376464266	2	MULTI	HCD	FTMS	0	0	0	-1	0	0	0	0	4	Unmodified	_ASGPIDHYR_	E1BKN2	116.029998779297	1	NaN	NaN	NaN	NaN	842	0	1	2471	3311
20140904-PurClathDigest-1ug-01	3316	33.275	24.662	6730000	0	NaN	502200	0.37	+	1863	KAEQGQLDIK	10	151	565.314268387131	1128.61398384106	2	MULTI	HCD	FTMS	0	0	0	-1	0	0	0	0	5	Unmodified	_KAEQGQLDIK_	F1MEW3	178.099395751953	1	NaN	NaN	NaN	NaN	843	0	1	2471	3311
20140904-PurClathDigest-1ug-01	3317	33.278	15.917	1617100	0	NaN	96068	0.36	-	-1		0	131	623.935349347148	1868.78421864164	3	MULTI	HCD	FTMS	0	0	0	-1	0	0	0	0	6				NaN	1	NaN	NaN	NaN	NaN	844	0	1	2471	3311
20140904-PurClathDigest-1ug-01	3318	33.281	38.054	1226800	0	NaN	162620	0.38	-	-1		0	85	416.181704663247	830.348856393294	2	MULTI	HCD	FTMS	0	0	0	-1	0	0	0	0	7				NaN	1	NaN	NaN	NaN	NaN	845	0	1	2471	3311
20140904-PurClathDigest-1ug-01	3320	33.293	2.104	5231200	0	NaN	1236300	0.38	-	-1		0	36	327.178778311343	652.343003689486	2	MULTI	HCD	FTMS	0	0	0	-1	0	0	0	0	1				NaN	1	NaN	NaN	NaN	NaN	846	0	1	2472	3319
20140904-PurClathDigest-1ug-01	3321	33.296	7.638	242800	0	NaN	67589	0.35	-	-1		0	18	318.173813501447	634.333074069694	2	MULTI	HCD	FTMS	0	0	0	-1	0	0	0	0	2				NaN	1	NaN	NaN	NaN	NaN	847	0	1	2472	3319
20140904-PurClathDigest-1ug-01	3322	33.299	18.018	3159600	0	NaN	730580	0.36	+	3708	SAKEEIAEYRR	11	116	676.352224597453	1350.68989626171	2	MULTI	HCD	FTMS	0	0	0	-1	0	0	0	0	3	Unmodified	_SAKEEIAEYRR_	F1MDZ2;O77788	168.250595092773	1	NaN	NaN	NaN	NaN	848	0	1	2472	3319
20140904-PurClathDigest-1ug-01	3323	33.302	20.404	453370	0	NaN	163580	0.37	-	-1		0	43	532.285850398079	1062.55714786296	2	MULTI	HCD	FTMS	0	0	0	-1	0	0	0	0	4				NaN	1	NaN	NaN	NaN	NaN	849	0	1	2472	3319
20140904-PurClathDigest-1ug-01	3324	33.305	17.946	1159500	0	NaN	89699	0.36	-	-1		0	125	809.767929474606	2426.28195902402	3	MULTI	HCD	FTMS	0	0	0	-1	0	0	0	0	5				NaN	1	NaN	NaN	NaN	NaN	850	0	1	2472	3319
20140904-PurClathDigest-1ug-01	3325	33.308	17.429	2063300	0	NaN	84936	0.37	-	-1		0	137	622.665033562214	1864.97327128684	3	MULTI	HCD	FTMS	0	0	0	-1	0	0	0	0	6				NaN	1	NaN	NaN	NaN	NaN	851	0	1	2472	3319
20140904-PurClathDigest-1ug-01	3326	33.311	32.29	2581900	0	NaN	351540	0.38	-	-1		0	144	795.393993346505	1588.77343375981	2	MULTI	HCD	FTMS	0	0	0	-1	0	0	0	0	7				NaN	1	NaN	NaN	NaN	NaN	852	0	1	2472	3319
20140904-PurClathDigest-1ug-01	3328	33.323	3.064	27634000	0	NaN	1554100	0.39	+	4526	VDKLDASESLRK	12	135	454.252367434369	1359.73527290331	3	MULTI	HCD	FTMS	0	0	0	-1	0	0	0	0	1	Unmodified	_VDKLDASESLRK_	P49951;F1MPU0	152.125793457031	1	NaN	NaN	NaN	NaN	853	0	1	2473	3327
20140904-PurClathDigest-1ug-01	3329	33.326	10.704	6630400	0	NaN	1749000	0.36	-	-1		0	72	431.214522900454	860.414492867709	2	MULTI	HCD	FTMS	0	0	0	-1	0	0	0	0	2				NaN	1	NaN	NaN	NaN	NaN	854	0	1	2473	3327
20140904-PurClathDigest-1ug-01	3330	33.329	7.387	6167200	0	NaN	1325300	0.35	-	-1		0	136	530.598530092539	1588.77376087782	3	MULTI	HCD	FTMS	0	0	0	-1	0	0	0	0	3				NaN	1	NaN	NaN	NaN	NaN	855	0	1	2473	3327
20140904-PurClathDigest-1ug-01	3331	33.332	14.198	8828700	0	NaN	1028500	0.36	+	4527	VDKLDASESLRK	12	129	680.875082843588	1359.73561275398	2	MULTI	HCD	FTMS	0	0	0	-1	0	0	0	0	4	Unmodified	_VDKLDASESLRK_	P49951;F1MPU0	173.614700317383	1	NaN	NaN	NaN	NaN	856	0	1	2473	3327
20140904-PurClathDigest-1ug-01	3332	33.335	15.434	5971800	0	NaN	244460	0.36	+	4542	VEEHEETFEEK	11	149	703.309169164816	1404.60378539643	2	MULTI	HCD	FTMS	0	0	0	-1	0	0	0	0	5	Unmodified	_VEEHEETFEEK_	F1MDZ2;O77788	248.811798095703	1	NaN	NaN	NaN	NaN	857	0	1	2473	3327
20140904-PurClathDigest-1ug-01	3333	33.338	16.727	3420900	0	NaN	579410	0.36	+	752	EEIAEYRR	8	101	533.27017202447	1064.52579111574	2	MULTI	HCD	FTMS	0	0	0	-1	0	0	0	0	6	Unmodified	_EEIAEYRR_	F1MDZ2;O77788	138.533203125	1	NaN	NaN	NaN	NaN	858	0	1	2473	3327
20140904-PurClathDigest-1ug-01	3334	33.341	11.873	1557800	0	NaN	134860	0.35	-	-1		0	81	377.211755274631	752.408957616062	2	MULTI	HCD	FTMS	0	0	0	-1	0	0	0	0	7				NaN	1	NaN	NaN	NaN	NaN	859	0	1	2473	3327
20140904-PurClathDigest-1ug-01	3336	33.352	5.963	18747000	0	NaN	1368600	0.39	+	4528	VDKLDASESLRK	12	141	340.941081596547	1359.73522051979	4	MULTI	HCD	FTMS	0	0	0	-1	0	0	0	0	1	Unmodified	_VDKLDASESLRK_	P49951;F1MPU0	63.5213394165039	1	NaN	NaN	NaN	NaN	860	0	1	2474	3335
20140904-PurClathDigest-1ug-01	3337	33.356	7.19	2627000	0	NaN	833370	0.35	+	4820	VSYRPTQVGR	10	69	388.215612005261	1161.62500661598	3	MULTI	HCD	FTMS	0	0	0	-1	0	0	0	0	2	Unmodified	_VSYRPTQVGR_	E1BKN2	77.8442230224609	1	NaN	NaN	NaN	NaN	861	0	1	2474	3335
20140904-PurClathDigest-1ug-01	3338	33.359	10.827	720230	0	NaN	85079	0.36	-	-1		0	55	631.340574289732	1260.66659564626	2	MULTI	HCD	FTMS	0	0	0	-1	0	0	0	0	3				NaN	1	NaN	NaN	NaN	NaN	862	0	1	2474	3335
20140904-PurClathDigest-1ug-01	3339	33.361	17.305	5418800	0	NaN	1300300	0.37	+	3250	NNRPSEGPLQTR	12	126	684.851889415328	1367.68922589746	2	MULTI	HCD	FTMS	0	0	0	-1	0	0	0	0	4	Unmodified	_NNRPSEGPLQTR_	P49951;F1MPU0	169.169006347656	1	NaN	NaN	NaN	NaN	863	0	1	2474	3335
20140904-PurClathDigest-1ug-01	3340	33.365	19.093	5337400	0	NaN	394810	0.36	+	3256	NNRPSEGPLQTR	12	138	456.903858272444	1367.68974541753	3	MULTI	HCD	FTMS	0	0	0	-1	0	0	0	0	5	Unmodified	_NNRPSEGPLQTR_	P49951;F1MPU0	153.747802734375	1	NaN	NaN	NaN	NaN	864	0	1	2474	3335
20140904-PurClathDigest-1ug-01	3341	33.368	13.678	3160800	0	NaN	176650	0.36	-	-1		0	154	486.263691621404	2426.28207577402	5	MULTI	HCD	FTMS	0	0	0	-1	0	0	0	0	6				NaN	1	NaN	NaN	NaN	NaN	865	0	1	2474	3335
20140904-PurClathDigest-1ug-01	3342	33.371	16.105	2334300	0	NaN	389570	0.36	+	105	AGGVSGTHHPRPGHDPPPLPQPDPR	25	105	644.826429109796	2575.27661057278	4	MULTI	HCD	FTMS	0	0	0	-1	0	0	0	0	7	Unmodified	_AGGVSGTHHPRPGHDPPPLPQPDPR_	F1N3M8;G3MYP5	65.1320037841797	1	NaN	NaN	NaN	NaN	866	0	1	2474	3335
20140904-PurClathDigest-1ug-01	3344	33.382	3.874	18564000	0	NaN	2062200	0.38	-	-1		0	61	315.694453901086	629.374354868971	2	MULTI	HCD	FTMS	0	0	0	-1	0	0	0	0	1				NaN	1	NaN	NaN	NaN	NaN	867	0	1	2475	3343
20140904-PurClathDigest-1ug-01	3345	33.385	3.461	6570700	0	NaN	588890	0.35	-	-1		0	130	607.577484751003	2426.28083313761	4	MULTI	HCD	FTMS	0	0	0	-1	0	0	0	0	2				NaN	1	NaN	NaN	NaN	NaN	868	0	1	2475	3343
20140904-PurClathDigest-1ug-01	3346	33.388	11.477	12619000	0	NaN	3339100	0.35	-	-1		0	58	306.689357262665	611.36416159213	2	MULTI	HCD	FTMS	0	0	0	-1	0	0	0	0	3				NaN	1	NaN	NaN	NaN	NaN	869	0	1	2475	3343
20140904-PurClathDigest-1ug-01	3347	33.391	13.094	2961400	0	NaN	242410	0.36	-	-1		0	78	392.75003655735	783.4855201815	2	MULTI	HCD	FTMS	0	0	0	-1	0	0	0	0	4				NaN	1	NaN	NaN	NaN	NaN	870	0	1	2475	3343
20140904-PurClathDigest-1ug-01	3348	33.394	11.099	1414000	0	NaN	232910	0.35	-	-1		0	78	421.229831224378	1260.66766427333	3	MULTI	HCD	FTMS	0	0	0	-1	0	0	0	0	5				NaN	1	NaN	NaN	NaN	NaN	871	0	1	2475	3343
20140904-PurClathDigest-1ug-01	3349	33.397	18.282	2646400	0	NaN	321680	0.36	+	2473	LDSELK	6	65	352.69485038402	703.37514783484	2	MULTI	HCD	FTMS	0	0	0	-1	0	0	0	0	6	Unmodified	_LDSELK_	E1BIX9;G3N0V2;A3KN27;CON__P12035;CON__ENSEMBL:ENSBTAP00000038253;CON__P04264	131.800003051758	1	NaN	NaN	NaN	NaN	872	0	1	2475	3343
20140904-PurClathDigest-1ug-01	3350	33.4	15.818	2624200	0	NaN	262150	0.36	-	-1		0	114	567.970320037275	1700.88913071202	3	MULTI	HCD	FTMS	0	0	0	-1	0	0	0	0	7				NaN	1	NaN	NaN	NaN	NaN	873	0	1	2475	3343
20140904-PurClathDigest-1ug-01	3352	33.411	3.363	10312000	0	NaN	798850	0.39	-	-1		0	119	884.400653634222	1766.78675433524	2	MULTI	HCD	FTMS	0	0	0	-1	0	0	0	0	1				NaN	1	NaN	NaN	NaN	NaN	874	0	1	2476	3351
20140904-PurClathDigest-1ug-01	3353	33.415	10.102	967020	0	NaN	138360	0.36	-	-1		0	66	876.403986601855	1750.79342027051	2	MULTI	HCD	FTMS	0	0	0	-1	0	0	0	0	2				NaN	1	NaN	NaN	NaN	NaN	875	0	1	2476	3351
20140904-PurClathDigest-1ug-01	3354	33.418	12.948	3627100	0	NaN	713030	0.35	-	-1		0	66	313.163303690442	624.312054447684	2	MULTI	HCD	FTMS	0	0	0	-1	0	0	0	0	3				NaN	1	NaN	NaN	NaN	NaN	876	0	1	2476	3351
20140904-PurClathDigest-1ug-01	3355	33.421	19.659	2356600	0	NaN	147490	0.36	-	-1		0	118	551.809004072762	1101.60345521232	2	MULTI	HCD	FTMS	0	0	0	-1	0	0	0	0	4				NaN	1	NaN	NaN	NaN	NaN	877	0	1	2476	3351
20140904-PurClathDigest-1ug-01	3356	33.424	24.935	3219300	0	NaN	441190	0.37	+	1766	ITITNDK	7	82	402.726635258627	803.438717584055	2	MULTI	HCD	FTMS	0	0	0	-1	0	0	0	0	5	Unmodified	_ITITNDK_	P0CB32;F1MWU9;P34933;P19120;Q27965;Q27975	145.127304077148	1	NaN	NaN	NaN	NaN	878	0	1	2476	3351
20140904-PurClathDigest-1ug-01	3357	33.427	33.06	1119100	0	NaN	192270	0.38	+	774	EGEVGVPDHSPR	12	103	639.80695182069	1277.59935070818	2	MULTI	HCD	FTMS	0	0	0	-1	0	0	0	0	6	Unmodified	_EGEVGVPDHSPR_	G3MYP5	169.503692626953	1	NaN	NaN	NaN	NaN	879	0	1	2476	3351
20140904-PurClathDigest-1ug-01	3358	33.43	22.215	268750	0	NaN	40671	0.37	-	-1		0	54	426.874048416066	1277.6003158484	3	MULTI	HCD	FTMS	0	0	0	-1	0	0	0	0	7				NaN	1	NaN	NaN	NaN	NaN	880	0	1	2476	3351
20140904-PurClathDigest-1ug-01	3360	33.442	17.676	2521100	0	NaN	233940	0.39	-	-1		0	112	704.848992678072	1407.68343242294	2	MULTI	HCD	FTMS	0	0	0	-1	0	0	0	0	1				NaN	1	NaN	NaN	NaN	NaN	881	0	1	2477	3359
20140904-PurClathDigest-1ug-01	3361	33.445	16.495	83706	0	NaN	13685	0.37	-	-1		0	23	1178.57793452059	2355.14131610797	2	MULTI	HCD	FTMS	0	0	0	-1	0	0	0	0	2				NaN	1	NaN	NaN	NaN	NaN	882	0	1	2477	3359
20140904-PurClathDigest-1ug-01	3362	33.448	18.424	4180400	0	NaN	528670	0.36	-	-1		0	118	505.224447828619	1008.43434272404	2	MULTI	HCD	FTMS	0	0	0	-1	0	0	0	0	3				NaN	1	NaN	NaN	NaN	NaN	883	0	1	2477	3359
20140904-PurClathDigest-1ug-01	3363	33.451	17.555	370900	0	NaN	106970	0.38	-	-1		0	51	516.062873580035	2575.27798556718	5	MULTI	HCD	FTMS	0	0	0	-1	0	0	0	0	4				NaN	1	NaN	NaN	NaN	NaN	884	0	1	2477	3359
20140904-PurClathDigest-1ug-01	3364	33.455	20.244	1145100	0	NaN	57816	0.35	-	-1		0	111	577.931458112632	1730.7725449381	3	MULTI	HCD	FTMS	0	0	0	-1	0	0	0	0	5				NaN	1	NaN	NaN	NaN	NaN	885	0	1	2477	3359
20140904-PurClathDigest-1ug-01	3365	33.457	15.587	4484300	0	NaN	932580	0.36	-	-1		0	130	510.236619862883	3055.3760603777	6	MULTI	HCD	FTMS	0	0	0	-1	0	0	0	0	6				NaN	1	NaN	NaN	NaN	NaN	886	0	1	2477	3359
20140904-PurClathDigest-1ug-01	3366	33.46	50.37	317250	0	NaN	26415	0.4	-	-1		0	99	866.3916330993	1730.7687132654	2	MULTI	HCD	FTMS	0	0	0	-1	0	0	0	0	7				NaN	1	NaN	NaN	NaN	NaN	887	0	1	2477	3359
20140904-PurClathDigest-1ug-01	3368	33.472	9.164	444380	0	NaN	233260	0.41	-	-1		0	27	612.081814937339	3055.37269235369	5	MULTI	HCD	FTMS	0	0	0	-1	0	0	0	0	1				NaN	1	NaN	NaN	NaN	NaN	888	0	1	2478	3367
20140904-PurClathDigest-1ug-01	3369	33.476	23.184	1872100	0	NaN	258610	0.37	+	1180	GADEAALAR	9	92	437.224780430804	872.435007928408	2	MULTI	HCD	FTMS	0	0	0	-1	0	0	0	0	2	Unmodified	_GADEAALAR_	P02548	97.2400894165039	1	NaN	NaN	NaN	NaN	889	0	1	2478	3367
20140904-PurClathDigest-1ug-01	3370	33.479	16.64	4613000	0	NaN	414750	0.36	-	-1		0	114	377.543905053921	1129.60988576196	3	MULTI	HCD	FTMS	0	0	0	-1	0	0	0	0	3				NaN	1	NaN	NaN	NaN	NaN	890	0	1	2478	3367
20140904-PurClathDigest-1ug-01	3371	33.482	13.449	1588400	0	NaN	213130	0.36	-	-1		0	99	764.850548574645	3055.37308843218	4	MULTI	HCD	FTMS	0	0	0	-1	0	0	0	0	4				NaN	1	NaN	NaN	NaN	NaN	891	0	1	2478	3367
20140904-PurClathDigest-1ug-01	3372	33.485	12.469	1121800	0	NaN	97224	0.36	-	-1		0	95	584.604822372827	1750.79263771868	3	MULTI	HCD	FTMS	0	0	0	-1	0	0	0	0	5				NaN	1	NaN	NaN	NaN	NaN	892	0	1	2478	3367
20140904-PurClathDigest-1ug-01	3373	33.488	29.23	63463	0	NaN	13055	0.38	-	-1		0	31	1196.55958948415	2391.1046260351	2	MULTI	HCD	FTMS	0	0	0	-1	0	0	0	0	6				NaN	1	NaN	NaN	NaN	NaN	893	0	1	2478	3367
20140904-PurClathDigest-1ug-01	3374	33.491	34.524	1612400	0	NaN	87205	0.38	-	-1		0	101	461.75866900251	921.50278507182	2	MULTI	HCD	FTMS	0	0	0	-1	0	0	0	0	7				NaN	1	NaN	NaN	NaN	NaN	894	0	1	2478	3367
20140904-PurClathDigest-1ug-01	3376	33.503	0.397	106620000	0	NaN	18380000	0.39	-	-1		0	97	589.936226754636	1766.78685086411	3	MULTI	HCD	FTMS	0	0	0	-1	0	0	0	0	1				NaN	1	NaN	NaN	NaN	NaN	895	0	1	2479	3375
20140904-PurClathDigest-1ug-01	3377	33.506	4.118	11008000	0	NaN	1804800	0.35	+	1113	FLEQQNK	7	86	453.738811843067	905.463070752935	2	MULTI	HCD	FTMS	0	0	0	-1	0	0	0	0	2	Unmodified	_FLEQQNK_	A6QP32;CON__H-INV:HIT000292931;CON__P04259;CON__P05787;CON__P08729;CON__P13647;CON__Q14533;CON__Q5XKE5;CON__Q6ISB0;CON__Q8BGZ7;CON__Q8N1N4-2;E1B898;F1MKE7;G3MXL3;M0QVZ6;Q0VD04;CON__P02538;CON__P12035;CON__P50446;CON__P78386;CON__Q61726;CON__Q6NT21;CON__Q922U2;CON__Q9DCV7;CON__Q9NSB2;F1MUY2;F1N362;F1N566;M0QVY0;Q08D91;Q148H4;Q148H7;Q5XQN5;A4FUZ0;A4IFP2;A5D7M6;A6QNX5;CON__O43790;CON__O95678;CON__P0…	120.464996337891	1	NaN	NaN	NaN	NaN	896	0	1	2479	3375
20140904-PurClathDigest-1ug-01	3378	33.509	11.491	5560200	0	NaN	907100	0.36	-	-1		0	107	565.314268387131	1128.61398384106	2	MULTI	HCD	FTMS	0	0	0	-1	0	0	0	0	3				NaN	1	NaN	NaN	NaN	NaN	897	0	1	2479	3375
20140904-PurClathDigest-1ug-01	3379	33.512	7.384	5481100	0	NaN	705540	0.36	-	-1		0	148	683.083350582463	2728.30429646345	4	MULTI	HCD	FTMS	0	0	0	-1	0	0	0	0	4				NaN	1	NaN	NaN	NaN	NaN	898	0	1	2479	3375
20140904-PurClathDigest-1ug-01	3380	33.515	8.058	7896800	0	NaN	623270	0.35	-	-1		0	180	546.668592664878	2728.30658099139	5	MULTI	HCD	FTMS	0	0	0	-1	0	0	0	0	5				NaN	1	NaN	NaN	NaN	NaN	899	0	1	2479	3375
20140904-PurClathDigest-1ug-01	3381	33.518	18.842	509880	0	NaN	72916	0.37	-	-1		0	83	1019.46568114487	3055.37521403482	3	MULTI	HCD	FTMS	0	0	0	-1	0	0	0	0	6				NaN	1	NaN	NaN	NaN	NaN	900	0	1	2479	3375
20140904-PurClathDigest-1ug-01	3382	33.521	19.416	1936400	0	NaN	207670	0.37	+	676	DTAPDQKDQAPEGKDEDLEPK	21	153	776.027623398577	2325.06104079593	3	MULTI	HCD	FTMS	0	0	0	-1	0	0	0	0	7	Unmodified	_DTAPDQKDQAPEGKDEDLEPK_	F1N3M8	108.319900512695	1	NaN	NaN	NaN	NaN	901	0	1	2479	3375
20140904-PurClathDigest-1ug-01	3384	33.532	5.856	3535000	0	NaN	540260	0.38	-	-1		0	119	910.441724722995	2728.30334476919	3	MULTI	HCD	FTMS	0	0	0	-1	0	0	0	0	1				NaN	1	NaN	NaN	NaN	NaN	902	0	1	2480	3383
20140904-PurClathDigest-1ug-01	3385	33.536	21.052	3366100	0	NaN	418080	0.37	-	-1		0	101	488.75544588346	975.49633883372	2	MULTI	HCD	FTMS	0	0	0	-1	0	0	0	0	2				NaN	1	NaN	NaN	NaN	NaN	903	0	1	2480	3383
20140904-PurClathDigest-1ug-01	3386	33.539	10.822	3666900	0	NaN	597400	0.36	-	-1		0	134	492.981681069386	1967.89761841114	4	MULTI	HCD	FTMS	0	0	0	-1	0	0	0	0	3				NaN	1	NaN	NaN	NaN	NaN	904	0	1	2480	3383
20140904-PurClathDigest-1ug-01	3387	33.542	22.325	3025300	0	NaN	793770	0.37	-	-1		0	80	400.68248192564	799.350410918081	2	MULTI	HCD	FTMS	0	0	0	-1	0	0	0	0	4				NaN	1	NaN	NaN	NaN	NaN	905	0	1	2480	3383
20140904-PurClathDigest-1ug-01	3388	33.545	19.499	799390	0	NaN	63783	0.37	-	-1		0	107	836.423048203759	2506.24731521148	3	MULTI	HCD	FTMS	0	0	0	-1	0	0	0	0	5				NaN	1	NaN	NaN	NaN	NaN	906	0	1	2480	3383
20140904-PurClathDigest-1ug-01	3389	33.548	19.966	2117700	0	NaN	202870	0.37	-	-1		0	112	594.608195982509	1780.80275854773	3	MULTI	HCD	FTMS	0	0	0	-1	0	0	0	0	6				NaN	1	NaN	NaN	NaN	NaN	907	0	1	2480	3383
20140904-PurClathDigest-1ug-01	3390	33.551	32.15	1526500	0	NaN	227330	0.38	-	-1		0	75	416.181704663247	830.348856393294	2	MULTI	HCD	FTMS	0	0	0	-1	0	0	0	0	7				NaN	1	NaN	NaN	NaN	NaN	908	0	1	2480	3383
20140904-PurClathDigest-1ug-01	3392	33.563	9.327	1798600	0	NaN	300600	0.38	-	-1		0	95	708.060159924881	2828.21153383312	4	MULTI	HCD	FTMS	0	0	0	-1	0	0	0	0	1				NaN	1	NaN	NaN	NaN	NaN	909	0	1	2481	3391
20140904-PurClathDigest-1ug-01	3393	33.566	11.519	3335900	0	NaN	309900	0.36	-	-1		0	126	656.97332526514	1967.89814639562	3	MULTI	HCD	FTMS	0	0	0	-1	0	0	0	0	2				NaN	1	NaN	NaN	NaN	NaN	910	0	1	2481	3391
20140904-PurClathDigest-1ug-01	3394	33.569	18.982	582350	0	NaN	59905	0.37	-	-1		0	81	943.744528045282	2828.21175473604	3	MULTI	HCD	FTMS	0	0	0	-1	0	0	0	0	3				NaN	1	NaN	NaN	NaN	NaN	911	0	1	2481	3391
20140904-PurClathDigest-1ug-01	3395	33.572	20.15	3905300	0	NaN	194560	0.37	-	-1		0	172	573.270126801218	1716.78855100386	3	MULTI	HCD	FTMS	0	0	0	-1	0	0	0	0	4				NaN	1	NaN	NaN	NaN	NaN	912	0	1	2481	3391
20140904-PurClathDigest-1ug-01	3396	33.575	30.771	2015900	0	NaN	217470	0.38	+	632	DQAPEGKDEDLEPK	14	153	785.862945591265	1569.71133824933	2	MULTI	HCD	FTMS	0	0	0	-1	0	0	0	0	5	Unmodified	_DQAPEGKDEDLEPK_	F1N3M8	93.4464569091797	1	NaN	NaN	NaN	NaN	913	0	1	2481	3391
20140904-PurClathDigest-1ug-01	3397	33.578	26.853	592010	0	NaN	61465	0.38	+	677	DTAPDQKDQAPEGKDEDLEPK	21	102	1163.5384211953	2325.06228945741	2	MULTI	HCD	FTMS	0	0	0	-1	0	0	0	0	6	Unmodified	_DTAPDQKDQAPEGKDEDLEPK_	F1N3M8	118.720397949219	1	NaN	NaN	NaN	NaN	914	0	1	2481	3391
20140904-PurClathDigest-1ug-01	3398	33.581	24.118	2457000	0	NaN	186560	0.37	+	678	DTAPDQKDQAPEGKDEDLEPK	21	170	582.272851773944	2325.06230122938	4	MULTI	HCD	FTMS	0	0	0	-1	0	0	0	0	7	Unmodified	_DTAPDQKDQAPEGKDEDLEPK_	F1N3M8	75.1049880981445	1	NaN	NaN	NaN	NaN	915	0	1	2481	3391
20140904-PurClathDigest-1ug-01	3400	33.593	4.801	6389200	0	NaN	872290	0.36	-	-1		0	115	566.650048249529	2828.21385891464	5	MULTI	HCD	FTMS	0	0	0	-1	0	0	0	0	1				NaN	1	NaN	NaN	NaN	NaN	916	0	1	2482	3399
20140904-PurClathDigest-1ug-01	3401	33.596	11.232	6434000	0	NaN	1559700	0.36	+	2736	LLEGEENR	8	86	480.243402263792	958.472251594383	2	MULTI	HCD	FTMS	0	0	0	-1	0	0	0	0	2	Unmodified	_LLEGEENR_	Q28115	174.46809387207	1	NaN	NaN	NaN	NaN	917	0	1	2482	3399
20140904-PurClathDigest-1ug-01	3402	33.599	11.611	3135100	0	NaN	190060	0.36	-	-1		0	148	524.575517929227	1570.70472438788	3	MULTI	HCD	FTMS	0	0	0	-1	0	0	0	0	3				NaN	1	NaN	NaN	NaN	NaN	918	0	1	2482	3399
20140904-PurClathDigest-1ug-01	3403	33.602	20.202	1345200	0	NaN	191480	0.37	+	671	DSYVGDEAQSK	11	93	599.764755734846	1197.51495853649	2	MULTI	HCD	FTMS	0	0	0	-1	0	0	0	0	4	Unmodified	_DSYVGDEAQSK_	F1MRD0;P60712;Q3ZC07;Q5E9B5;P62739;P63258;P68138;G8JKX4	135.734100341797	1	NaN	NaN	NaN	NaN	919	0	1	2482	3399
20140904-PurClathDigest-1ug-01	3404	33.605	18.983	779530	0	NaN	60885	0.37	-	-1		0	109	809.767929474606	2426.28195902402	3	MULTI	HCD	FTMS	0	0	0	-1	0	0	0	0	5				NaN	1	NaN	NaN	NaN	NaN	920	0	1	2482	3399
20140904-PurClathDigest-1ug-01	3405	33.608	20.504	996610	0	NaN	95907	0.36	-	-1		0	107	563.294357591608	1686.86124337502	3	MULTI	HCD	FTMS	0	0	0	-1	0	0	0	0	6				NaN	1	NaN	NaN	NaN	NaN	921	0	1	2482	3399
20140904-PurClathDigest-1ug-01	3406	33.611	14.94	753550	0	NaN	129340	0.36	-	-1		0	85	486.263691621404	2426.28207577402	5	MULTI	HCD	FTMS	0	0	0	-1	0	0	0	0	7				NaN	1	NaN	NaN	NaN	NaN	922	0	1	2482	3399
20140904-PurClathDigest-1ug-01	3408	33.623	7.439	6094300	0	NaN	667240	0.36	-	-1		0	51	315.694453901086	629.374354868971	2	MULTI	HCD	FTMS	0	0	0	-1	0	0	0	0	1				NaN	1	NaN	NaN	NaN	NaN	923	0	1	2483	3407
20140904-PurClathDigest-1ug-01	3409	33.626	6.586	3874800	0	NaN	316840	0.35	-	-1		0	128	607.828436848419	2427.28464152728	4	MULTI	HCD	FTMS	0	0	0	-1	0	0	0	0	2				NaN	1	NaN	NaN	NaN	NaN	924	0	1	2483	3407
20140904-PurClathDigest-1ug-01	3410	33.629	12.197	8312500	0	NaN	239930	0.36	-	-1		0	183	558.293998761684	2229.14688918034	4	MULTI	HCD	FTMS	0	0	0	-1	0	0	0	0	3				NaN	1	NaN	NaN	NaN	NaN	925	0	1	2483	3407
20140904-PurClathDigest-1ug-01	3411	33.632	13.855	4281900	0	NaN	922760	0.36	-	-1		0	136	627.568849098313	2506.24629052685	4	MULTI	HCD	FTMS	0	0	0	-1	0	0	0	0	4				NaN	1	NaN	NaN	NaN	NaN	926	0	1	2483	3407
20140904-PurClathDigest-1ug-01	3412	33.635	21.817	2490700	0	NaN	782650	0.36	-	-1		0	45	306.689357262665	611.36416159213	2	MULTI	HCD	FTMS	0	0	0	-1	0	0	0	0	5				NaN	1	NaN	NaN	NaN	NaN	927	0	1	2483	3407
20140904-PurClathDigest-1ug-01	3413	33.638	19.493	3692100	0	NaN	92802	0.36	-	-1		0	204	744.39084052793	2230.15069218399	3	MULTI	HCD	FTMS	0	0	0	-1	0	0	0	0	6				NaN	1	NaN	NaN	NaN	NaN	928	0	1	2483	3407
20140904-PurClathDigest-1ug-01	3414	33.641	21.365	605990	0	NaN	30074	0.37	-	-1		0	88	430.204582770843	1716.78922521697	4	MULTI	HCD	FTMS	0	0	0	-1	0	0	0	0	7				NaN	1	NaN	NaN	NaN	NaN	929	0	1	2483	3407
20140904-PurClathDigest-1ug-01	3416	33.653	3.861	8202600	0	NaN	1665700	0.37	-	-1		0	56	313.163303690442	624.312054447684	2	MULTI	HCD	FTMS	0	0	0	-1	0	0	0	0	1				NaN	1	NaN	NaN	NaN	NaN	930	0	1	2484	3415
20140904-PurClathDigest-1ug-01	3417	33.656	9.678	2724600	0	NaN	184430	0.35	+	3823	SKAEAESLYQSK	12	110	670.838197970098	1339.661843007	2	MULTI	HCD	FTMS	0	0	0	-1	0	0	0	0	2	Unmodified	_SKAEAESLYQSK_	CON__P04264	183.964797973633	1	NaN	NaN	NaN	NaN	931	0	1	2484	3415
20140904-PurClathDigest-1ug-01	3418	33.659	12.631	2249500	0	NaN	145630	0.36	-	-1		0	111	884.400653634222	1766.78675433524	2	MULTI	HCD	FTMS	0	0	0	-1	0	0	0	0	3				NaN	1	NaN	NaN	NaN	NaN	932	0	1	2484	3415
20140904-PurClathDigest-1ug-01	3419	33.662	14.544	2538900	0	NaN	434270	0.35	+	4765	VQVEYK	6	52	383.210762966271	764.406972999343	2	MULTI	HCD	FTMS	0	0	0	-1	0	0	0	0	4	Unmodified	_VQVEYK_	P34933;P19120	96.7420196533203	1	NaN	NaN	NaN	NaN	933	0	1	2484	3415
20140904-PurClathDigest-1ug-01	3420	33.665	21.973	2504800	0	NaN	319700	0.36	-	-1		0	142	783.351700797087	1564.68884866097	2	MULTI	HCD	FTMS	0	0	0	-1	0	0	0	0	5				NaN	1	NaN	NaN	NaN	NaN	934	0	1	2484	3415
20140904-PurClathDigest-1ug-01	3421	33.668	20.773	3452400	0	NaN	273550	0.37	-	-1		0	138	690.845855422452	1379.6771579117	2	MULTI	HCD	FTMS	0	0	0	-1	0	0	0	0	6				NaN	1	NaN	NaN	NaN	NaN	935	0	1	2484	3415
20140904-PurClathDigest-1ug-01	3422	33.671	16.423	1815800	0	NaN	114510	0.36	+	2253	KVMSQEIQEQLHK	13	112	538.615815812424	1612.82561803747	3	MULTI	HCD	FTMS	0	0	0	-1	0	0	0	0	7	Oxidation (M)	_KVM(ox)SQEIQEQLHK_	E1BDX8	101.794403076172	1	NaN	NaN	NaN	NaN	936	0	1	2484	3415
20140904-PurClathDigest-1ug-01	3424	33.682	10.805	2966700	0	NaN	176610	0.39	+	2510	LEEEGQSLKDEMAR	14	126	825.885148389401	1649.7557438456	2	MULTI	HCD	FTMS	0	0	0	-1	0	0	0	0	1	Oxidation (M)	_LEEEGQSLKDEM(ox)AR_	Q28115	111.319297790527	1	NaN	NaN	NaN	NaN	937	0	1	2485	3423
20140904-PurClathDigest-1ug-01	3425	33.686	8.231	4536900	0	NaN	446480	0.34	-	-1		0	112	589.936226754636	1766.78685086411	3	MULTI	HCD	FTMS	0	0	0	-1	0	0	0	0	2				NaN	1	NaN	NaN	NaN	NaN	938	0	1	2485	3423
20140904-PurClathDigest-1ug-01	3426	33.689	9.892	3237700	0	NaN	387230	0.36	-	-1		0	107	460.899736793335	1379.67738098021	3	MULTI	HCD	FTMS	0	0	0	-1	0	0	0	0	3				NaN	1	NaN	NaN	NaN	NaN	939	0	1	2485	3423
20140904-PurClathDigest-1ug-01	3427	33.692	19.431	584440	0	NaN	64569	0.37	-	-1		0	78	522.570223860742	1564.68884218243	3	MULTI	HCD	FTMS	0	0	0	-1	0	0	0	0	4				NaN	1	NaN	NaN	NaN	NaN	940	0	1	2485	3423
20140904-PurClathDigest-1ug-01	3428	33.695	25.138	1750500	0	NaN	99298	0.37	-	-1		0	121	640.601479999235	1918.78261059791	3	MULTI	HCD	FTMS	0	0	0	-1	0	0	0	0	5				NaN	1	NaN	NaN	NaN	NaN	941	0	1	2485	3423
20140904-PurClathDigest-1ug-01	3429	33.698	36.352	599740	0	NaN	64654	0.39	-	-1		0	110	1115.58167197293	2229.14879101266	2	MULTI	HCD	FTMS	0	0	0	-1	0	0	0	0	6				NaN	1	NaN	NaN	NaN	NaN	942	0	1	2485	3423
20140904-PurClathDigest-1ug-01	3430	33.701	28.191	1187700	0	NaN	130290	0.37	-	-1		0	154	604.630234177528	1810.86887313278	3	MULTI	HCD	FTMS	0	0	0	-1	0	0	0	0	7				NaN	1	NaN	NaN	NaN	NaN	943	0	1	2485	3423
20140904-PurClathDigest-1ug-01	3432	33.713	12.098	2093400	0	NaN	165960	0.38	-	-1		0	109	884.400653634222	1766.78675433524	2	MULTI	HCD	FTMS	0	0	0	-1	0	0	0	0	1				NaN	1	NaN	NaN	NaN	NaN	944	0	1	2486	3431
20140904-PurClathDigest-1ug-01	3433	33.716	28.089	506250	0	NaN	49599	0.39	-	-1		0	84	960.398940586175	1918.78332823915	2	MULTI	HCD	FTMS	0	0	0	-1	0	0	0	0	2				NaN	1	NaN	NaN	NaN	NaN	945	0	1	2486	3431
20140904-PurClathDigest-1ug-01	3434	33.72	15.898	307920	0	NaN	36545	0.34	+	3824	SKAEAESLYQSK	12	57	447.561319012685	1339.66212763826	3	MULTI	HCD	FTMS	0	0	0	-1	0	0	0	0	3	Unmodified	_SKAEAESLYQSK_	CON__P04264	45.1275787353516	1	NaN	NaN	NaN	NaN	946	0	1	2486	3431
20140904-PurClathDigest-1ug-01	3435	33.723	26.789	149710	0	NaN	22185	0.38	-	-1		0	48	1254.13319646878	2506.25184000436	2	MULTI	HCD	FTMS	0	0	0	-1	0	0	0	0	4				NaN	1	NaN	NaN	NaN	NaN	947	0	1	2486	3431
20140904-PurClathDigest-1ug-01	3436	33.726	49.218	1388000	0	NaN	380300	0.4	-	-1		0	116	508.243585293554	1014.47261765391	2	MULTI	HCD	FTMS	0	0	0	-1	0	0	0	0	5				NaN	1	NaN	NaN	NaN	NaN	948	0	1	2486	3431
20140904-PurClathDigest-1ug-01	3437	33.729	63.861	188300	0	NaN	24910	0.41	-	-1		0	84	876.397659832065	1750.78076673093	2	MULTI	HCD	FTMS	0	0	0	-1	0	0	0	0	6				NaN	1	NaN	NaN	NaN	NaN	949	0	1	2486	3431
20140904-PurClathDigest-1ug-01	3438	33.733	71.512	47067	0	NaN	5121.6	0.42	-	-1		0	43	704.821661467048	1407.6287700009	2	MULTI	HCD	FTMS	0	0	0	-1	0	0	0	0	7				NaN	1	NaN	NaN	NaN	NaN	950	0	1	2486	3431
20140904-PurClathDigest-1ug-01	3440	33.746	4.728	10800000	0	NaN	1388300	0.37	+	3573	RLQELDAASK	10	91	565.8115547001	1129.608556467	2	MULTI	HCD	FTMS	0	0	0	-1	0	0	0	0	1	Unmodified	_RLQELDAASK_	G3N252;P04975	174.377197265625	1	NaN	NaN	NaN	NaN	951	0	1	2487	3439
20140904-PurClathDigest-1ug-01	3441	33.749	6.22	2508100	0	NaN	283900	0.35	-	-1		0	97	546.668592664878	2728.30658099139	5	MULTI	HCD	FTMS	0	0	0	-1	0	0	0	0	2				NaN	1	NaN	NaN	NaN	NaN	952	0	1	2487	3439
20140904-PurClathDigest-1ug-01	3442	33.752	8.492	1339700	0	NaN	201930	0.36	-	-1		0	84	683.083350582463	2728.30429646345	4	MULTI	HCD	FTMS	0	0	0	-1	0	0	0	0	3				NaN	1	NaN	NaN	NaN	NaN	953	0	1	2487	3439
20140904-PurClathDigest-1ug-01	3443	33.755	16.193	904590	0	NaN	241820	0.36	-	-1		0	83	511.732881221011	2042.90241901765	4	MULTI	HCD	FTMS	0	0	0	-1	0	0	0	0	4				NaN	1	NaN	NaN	NaN	NaN	954	0	1	2487	3439
20140904-PurClathDigest-1ug-01	3444	33.758	37.786	828500	0	NaN	47218	0.39	-	-1		0	104	581.795270325648	1161.5759877181	2	MULTI	HCD	FTMS	0	0	0	-1	0	0	0	0	5				NaN	1	NaN	NaN	NaN	NaN	955	0	1	2487	3439
20140904-PurClathDigest-1ug-01	3445	33.761	35.661	748300	0	NaN	61784	0.38	+	296	ALTNQQEASVER	12	95	673.338976503834	1344.66340007447	2	MULTI	HCD	FTMS	0	0	0	-1	0	0	0	0	6	Unmodified	_ALTNQQEASVER_	F1MIC9	204.857299804688	1	NaN	NaN	NaN	NaN	956	0	1	2487	3439
20140904-PurClathDigest-1ug-01	3446	33.764	61.02	277650	0	NaN	39480	0.41	-	-1		0	116	906.441202583698	1810.8678522342	2	MULTI	HCD	FTMS	0	0	0	-1	0	0	0	0	7				NaN	1	NaN	NaN	NaN	NaN	957	0	1	2487	3439
20140904-PurClathDigest-1ug-01	3448	33.777	3.58	3999200	0	NaN	341790	0.36	-	-1		0	98	836.423048203759	2506.24731521148	3	MULTI	HCD	FTMS	0	0	0	-1	0	0	0	0	1				NaN	1	NaN	NaN	NaN	NaN	958	0	1	2488	3447
20140904-PurClathDigest-1ug-01	3449	33.78	11.991	1037900	0	NaN	250860	0.36	-	-1		0	85	681.974941224442	2042.90299427353	3	MULTI	HCD	FTMS	0	0	0	-1	0	0	0	0	2				NaN	1	NaN	NaN	NaN	NaN	959	0	1	2488	3447
20140904-PurClathDigest-1ug-01	3450	33.783	30.46	2209400	0	NaN	535820	0.38	+	3283	NNRPSEGPLQTR	12	110	685.344665193787	1368.67477745437	2	MULTI	HCD	FTMS	0	0	0	-1	0	0	0	0	3	Deamidation (NQ)	_N(de)NRPSEGPLQTR_	P49951;F1MPU0	103.867401123047	1	NaN	NaN	NaN	NaN	960	0	1	2488	3447
20140904-PurClathDigest-1ug-01	3451	33.787	23.771	1102500	0	NaN	64456	0.35	-	-1		0	140	631.553534521604	2522.18503222001	4	MULTI	HCD	FTMS	0	0	0	-1	0	0	0	0	4				NaN	1	NaN	NaN	NaN	NaN	961	0	1	2488	3447
20140904-PurClathDigest-1ug-01	3452	33.789	38.035	246230	0	NaN	44844	0.39	-	-1		0	65	910.441724722995	2728.30334476919	3	MULTI	HCD	FTMS	0	0	0	-1	0	0	0	0	5				NaN	1	NaN	NaN	NaN	NaN	962	0	1	2488	3447
20140904-PurClathDigest-1ug-01	3453	33.793	45.319	765880	0	NaN	53355	0.39	-	-1		0	124	584.933859538228	1751.77974921489	3	MULTI	HCD	FTMS	0	0	0	-1	0	0	0	0	6				NaN	1	NaN	NaN	NaN	NaN	963	0	1	2488	3447
20140904-PurClathDigest-1ug-01	3454	33.796	59.791	153530	0	NaN	43305	0.41	-	-1		0	56	1022.45836981759	2042.90218670199	2	MULTI	HCD	FTMS	0	0	0	-1	0	0	0	0	7				NaN	1	NaN	NaN	NaN	NaN	964	0	1	2488	3447
20140904-PurClathDigest-1ug-01	3456	33.809	38.14	224990	0	NaN	19327	0.39	-	-1		0	76	841.736206742728	2522.18679082839	3	MULTI	HCD	FTMS	0	0	0	-1	0	0	0	0	1				NaN	1	NaN	NaN	NaN	NaN	965	0	1	2489	3455
20140904-PurClathDigest-1ug-01	3457	33.812	49.18	679060	0	NaN	42519	0.39	-	-1		0	141	597.287885386031	1788.84182675829	3	MULTI	HCD	FTMS	0	0	0	-1	0	0	0	0	2				NaN	1	NaN	NaN	NaN	NaN	966	0	1	2489	3455
20140904-PurClathDigest-1ug-01	3458	33.816	37.434	1332500	0	NaN	54146	0.38	-	-1		0	169	505.44505468221	2522.18889107805	5	MULTI	HCD	FTMS	0	0	0	-1	0	0	0	0	3				NaN	1	NaN	NaN	NaN	NaN	967	0	1	2489	3455
20140904-PurClathDigest-1ug-01	3459	33.819	100.46	16281	0	NaN	1785.2	0.45	-	-1		0	27	769.34284370541	1536.67113447762	2	MULTI	HCD	FTMS	0	0	0	-1	0	0	0	0	4				NaN	1	NaN	NaN	NaN	NaN	968	0	1	2489	3455
20140904-PurClathDigest-1ug-01	3460	33.824	72.984	993530	0	NaN	66900	0.42	-	-1		0	166	577.304570248487	1728.89188134566	3	MULTI	HCD	FTMS	0	0	0	-1	0	0	0	0	5				NaN	1	NaN	NaN	NaN	NaN	969	0	1	2489	3455
20140904-PurClathDigest-1ug-01	3461	33.828	162.92	142760	0	NaN	15311	0.51	-	-1		0	118	819.405796864295	1636.79704079539	2	MULTI	HCD	FTMS	0	0	0	-1	0	0	0	0	6				NaN	1	NaN	NaN	NaN	NaN	970	0	1	2489	3455
20140904-PurClathDigest-1ug-01	3462	33.833	141.67	188150	0	NaN	24273	0.49	+	633	DQAPEGKDEDLEPK	14	115	785.862945591265	1569.71133824933	2	MULTI	HCD	FTMS	0	0	0	-1	0	0	0	0	7	Unmodified	_DQAPEGKDEDLEPK_	F1N3M8	103.129997253418	1	NaN	NaN	NaN	NaN	971	0	1	2489	3455
20140904-PurClathDigest-1ug-01	3464	33.847	23.383	1241700	0	NaN	54875	0.37	-	-1		0	144	749.378541256271	2245.11379436901	3	MULTI	HCD	FTMS	0	0	0	-1	0	0	0	0	1				NaN	1	NaN	NaN	NaN	NaN	972	0	1	2490	3463
20140904-PurClathDigest-1ug-01	3465	33.85	21.285	2129700	0	NaN	94845	0.38	-	-1		0	148	562.286239130783	2245.11585065673	4	MULTI	HCD	FTMS	0	0	0	-1	0	0	0	0	2				NaN	1	NaN	NaN	NaN	NaN	973	0	1	2490	3463
20140904-PurClathDigest-1ug-01	3466	33.853	67.975	663440	0	NaN	72411	0.4	-	-1		0	111	481.253988637662	1440.74013651319	3	MULTI	HCD	FTMS	0	0	0	-1	0	0	0	0	3				NaN	1	NaN	NaN	NaN	NaN	974	0	1	2490	3463
20140904-PurClathDigest-1ug-01	3467	33.857	58.919	483160	0	NaN	77481	0.41	-	-1		0	120	711.662256422636	2131.96493986811	3	MULTI	HCD	FTMS	0	0	0	-1	0	0	0	0	4				NaN	1	NaN	NaN	NaN	NaN	975	0	1	2490	3463
20140904-PurClathDigest-1ug-01	3468	33.861	50.404	1004600	0	NaN	56237	0.4	-	-1		0	148	487.49241948907	1945.94057208988	4	MULTI	HCD	FTMS	0	0	0	-1	0	0	0	0	5				NaN	1	NaN	NaN	NaN	NaN	976	0	1	2490	3463
20140904-PurClathDigest-1ug-01	3469	33.864	55.454	895430	0	NaN	167010	0.4	-	-1		0	162	635.941466425972	1904.80256987811	3	MULTI	HCD	FTMS	0	0	0	-1	0	0	0	0	6				NaN	1	NaN	NaN	NaN	NaN	977	0	1	2490	3463
20140904-PurClathDigest-1ug-01	3470	33.868	60.074	1274600	0	NaN	90413	0.41	-	-1		0	193	716.018154272921	2145.03263341896	3	MULTI	HCD	FTMS	0	0	0	-1	0	0	0	0	7				NaN	1	NaN	NaN	NaN	NaN	978	0	1	2490	3463
20140904-PurClathDigest-1ug-01	3472	33.881	1.777	14290000	0	NaN	1280700	0.36	-	-1		0	122	627.568849098313	2506.24629052685	4	MULTI	HCD	FTMS	0	0	0	-1	0	0	0	0	1				NaN	1	NaN	NaN	NaN	NaN	979	0	1	2491	3471
20140904-PurClathDigest-1ug-01	3473	33.884	15.642	4125000	0	NaN	292630	0.38	-	-1		0	139	656.972974314289	1967.89709354307	3	MULTI	HCD	FTMS	0	0	0	-1	0	0	0	0	2				NaN	1	NaN	NaN	NaN	NaN	980	0	1	2491	3471
20140904-PurClathDigest-1ug-01	3474	33.887	18.074	2353800	0	NaN	174680	0.35	-	-1		0	146	537.266353576371	2145.03630843908	4	MULTI	HCD	FTMS	0	0	0	-1	0	0	0	0	3				NaN	1	NaN	NaN	NaN	NaN	981	0	1	2491	3471
20140904-PurClathDigest-1ug-01	3475	33.89	35.023	751300	0	NaN	41232	0.39	-	-1		0	128	1123.5645337236	2245.11451451399	2	MULTI	HCD	FTMS	0	0	0	-1	0	0	0	0	4				NaN	1	NaN	NaN	NaN	NaN	982	0	1	2491	3471
20140904-PurClathDigest-1ug-01	3476	33.893	24.724	4224200	0	NaN	176100	0.37	-	-1		0	190	492.981784389275	1967.8980316907	4	MULTI	HCD	FTMS	0	0	0	-1	0	0	0	0	5				NaN	1	NaN	NaN	NaN	NaN	983	0	1	2491	3471
20140904-PurClathDigest-1ug-01	3477	33.896	57.506	658820	0	NaN	49439	0.41	-	-1		0	135	900.387071209185	1798.75958948517	2	MULTI	HCD	FTMS	0	0	0	-1	0	0	0	0	6				NaN	1	NaN	NaN	NaN	NaN	984	0	1	2491	3471
20140904-PurClathDigest-1ug-01	3478	33.9	35.197	198000	0	NaN	11409	0.38	-	-1		0	70	600.593933318401	1798.7599705554	3	MULTI	HCD	FTMS	0	0	0	-1	0	0	0	0	7				NaN	1	NaN	NaN	NaN	NaN	985	0	1	2491	3471
20140904-PurClathDigest-1ug-01	3480	33.912	4.948	6819100	0	NaN	650250	0.37	-	-1		0	117	690.845855422452	1379.6771579117	2	MULTI	HCD	FTMS	0	0	0	-1	0	0	0	0	1				NaN	1	NaN	NaN	NaN	NaN	986	0	1	2492	3479
20140904-PurClathDigest-1ug-01	3481	33.915	11.307	2855800	0	NaN	178090	0.36	+	1581	IHEGCEEPATHNALAK	16	125	573.941669548124	1718.80317924457	3	MULTI	HCD	FTMS	0	0	0	-1	0	0	0	0	2	Unmodified	_IHEGCEEPATHNALAK_	P49951;F1MPU0	123.472198486328	1	NaN	NaN	NaN	NaN	987	0	1	2492	3479
20140904-PurClathDigest-1ug-01	3482	33.918	21.065	1741000	0	NaN	339850	0.37	-	-1		0	96	984.955995652286	1967.89743837137	2	MULTI	HCD	FTMS	0	0	0	-1	0	0	0	0	3				NaN	1	NaN	NaN	NaN	NaN	988	0	1	2492	3479
20140904-PurClathDigest-1ug-01	3483	33.921	26.359	865680	0	NaN	38708	0.38	-	-1		0	110	1073.52450437532	2145.03445581743	2	MULTI	HCD	FTMS	0	0	0	-1	0	0	0	0	4				NaN	1	NaN	NaN	NaN	NaN	989	0	1	2492	3479
20140904-PurClathDigest-1ug-01	3484	33.924	24.143	1794400	0	NaN	149820	0.37	+	1016	EVAAEETAKPGPDKGALEEEGK	22	130	752.372253923366	2254.0949323703	3	MULTI	HCD	FTMS	0	0	0	-1	0	0	0	0	5	Unmodified	_EVAAEETAKPGPDKGALEEEGK_	G3MYP5	125.317596435547	1	NaN	NaN	NaN	NaN	990	0	1	2492	3479
20140904-PurClathDigest-1ug-01	3485	33.927	21.183	992780	0	NaN	448800	0.37	-	-1		0	51	533.998949405316	2131.96669175487	4	MULTI	HCD	FTMS	0	0	0	-1	0	0	0	0	6				NaN	1	NaN	NaN	NaN	NaN	991	0	1	2492	3479
20140904-PurClathDigest-1ug-01	3486	33.93	31.877	542840	0	NaN	116520	0.38	-	-1		0	80	953.40838800117	1904.80222306914	2	MULTI	HCD	FTMS	0	0	0	-1	0	0	0	0	7				NaN	1	NaN	NaN	NaN	NaN	992	0	1	2492	3479
20140904-PurClathDigest-1ug-01	3488	33.943	4.579	6977500	0	NaN	1538900	0.36	-	-1		0	99	460.899736793335	1379.67738098021	3	MULTI	HCD	FTMS	0	0	0	-1	0	0	0	0	1				NaN	1	NaN	NaN	NaN	NaN	993	0	1	2493	3487
20140904-PurClathDigest-1ug-01	3489	33.946	7.794	4268600	0	NaN	220590	0.35	-	-1		0	110	589.936226754636	1766.78685086411	3	MULTI	HCD	FTMS	0	0	0	-1	0	0	0	0	2				NaN	1	NaN	NaN	NaN	NaN	994	0	1	2493	3487
20140904-PurClathDigest-1ug-01	3490	33.948	39.184	1594000	0	NaN	499540	0.38	-	-1		0	107	697.860130344238	1393.70570775528	2	MULTI	HCD	FTMS	0	0	0	-1	0	0	0	0	3				NaN	1	NaN	NaN	NaN	NaN	995	0	1	2493	3487
20140904-PurClathDigest-1ug-01	3491	33.952	18.43	620060	0	NaN	63088	0.36	-	-1		0	75	417.592231808085	2082.92477670743	5	MULTI	HCD	FTMS	0	0	0	-1	0	0	0	0	4				NaN	1	NaN	NaN	NaN	NaN	996	0	1	2493	3487
20140904-PurClathDigest-1ug-01	3492	33.955	19.529	231790	0	NaN	50338	0.37	-	-1		0	44	477.208071201665	1904.80317894026	4	MULTI	HCD	FTMS	0	0	0	-1	0	0	0	0	5				NaN	1	NaN	NaN	NaN	NaN	997	0	1	2493	3487
20140904-PurClathDigest-1ug-01	3493	33.958	24.474	319780	0	NaN	117630	0.37	-	-1		0	48	430.014151810049	2145.03437671725	5	MULTI	HCD	FTMS	0	0	0	-1	0	0	0	0	6				NaN	1	NaN	NaN	NaN	NaN	998	0	1	2493	3487
20140904-PurClathDigest-1ug-01	3494	33.961	41.457	541100	0	NaN	99992	0.39	-	-1		0	104	1066.99073452528	2131.96691611736	2	MULTI	HCD	FTMS	0	0	0	-1	0	0	0	0	7				NaN	1	NaN	NaN	NaN	NaN	999	0	1	2493	3487
20140904-PurClathDigest-1ug-01	3496	33.973	17.886	1662000	0	NaN	114220	0.37	-	-1		0	118	884.400653634222	1766.78675433524	2	MULTI	HCD	FTMS	0	0	0	-1	0	0	0	0	1				NaN	1	NaN	NaN	NaN	NaN	1000	0	1	2494	3495
20140904-PurClathDigest-1ug-01	3497	33.976	22.887	921320	0	NaN	159830	0.37	-	-1		0	117	757.69548758165	2270.06463334515	3	MULTI	HCD	FTMS	0	0	0	-1	0	0	0	0	2				NaN	1	NaN	NaN	NaN	NaN	1001	0	1	2494	3495
20140904-PurClathDigest-1ug-01	3498	33.98	17.863	1461100	0	NaN	198510	0.37	-	-1		0	105	521.738532110707	2082.92502257643	4	MULTI	HCD	FTMS	0	0	0	-1	0	0	0	0	3				NaN	1	NaN	NaN	NaN	NaN	1002	0	1	2494	3495
20140904-PurClathDigest-1ug-01	3499	33.983	33.466	2488700	0	NaN	396410	0.38	-	-1		0	143	653.30762693587	1304.60070093854	2	MULTI	HCD	FTMS	0	0	0	-1	0	0	0	0	4				NaN	1	NaN	NaN	NaN	NaN	1003	0	1	2494	3495
20140904-PurClathDigest-1ug-01	3500	33.986	25.924	774560	0	NaN	192990	0.37	-	-1		0	69	435.87512738037	1304.60355274131	3	MULTI	HCD	FTMS	0	0	0	-1	0	0	0	0	5				NaN	1	NaN	NaN	NaN	NaN	1004	0	1	2494	3495
20140904-PurClathDigest-1ug-01	3501	33.989	53.266	328390	0	NaN	41210	0.4	+	1017	EVAAEETAKPGPDKGALEEEGK	22	119	1128.05593502578	2254.09731711835	2	MULTI	HCD	FTMS	0	0	0	-1	0	0	0	0	6	Unmodified	_EVAAEETAKPGPDKGALEEEGK_	G3MYP5	168.536407470703	1	NaN	NaN	NaN	NaN	1005	0	1	2494	3495
20140904-PurClathDigest-1ug-01	3502	33.993	30.095	703990	0	NaN	79640	0.38	-	-1		0	126	794.368837017889	3173.44624220515	4	MULTI	HCD	FTMS	0	0	0	-1	0	0	0	0	7				NaN	1	NaN	NaN	NaN	NaN	1006	0	1	2494	3495
20140904-PurClathDigest-1ug-01	3504	34.005	3.98	14101000	0	NaN	1813300	0.35	+	3574	RLQELDAASK	10	99	565.8115547001	1129.608556467	2	MULTI	HCD	FTMS	0	0	0	-1	0	0	0	0	1	Unmodified	_RLQELDAASK_	G3N252;P04975	199.493392944336	1	NaN	NaN	NaN	NaN	1007	0	1	2495	3503
20140904-PurClathDigest-1ug-01	3505	34.008	3.77	9145000	0	NaN	899490	0.35	+	3285	NNRPSEGPLQTR	12	108	457.232412104559	1368.67540691388	3	MULTI	HCD	FTMS	0	0	0	-1	0	0	0	0	2	Deamidation (NQ)	_N(de)NRPSEGPLQTR_	P49951;F1MPU0	129.946792602539	1	NaN	NaN	NaN	NaN	1008	0	1	2495	3503
20140904-PurClathDigest-1ug-01	3506	34.01	18.397	6092100	0	NaN	708200	0.36	-	-1		0	128	505.224252528012	1008.43395212282	2	MULTI	HCD	FTMS	0	0	0	-1	0	0	0	0	3				NaN	1	NaN	NaN	NaN	NaN	1009	0	1	2495	3503
20140904-PurClathDigest-1ug-01	3507	34.014	18.389	4219900	0	NaN	289390	0.37	-	-1		0	166	558.916631533221	1673.72806519986	3	MULTI	HCD	FTMS	0	0	0	-1	0	0	0	0	4				NaN	1	NaN	NaN	NaN	NaN	1010	0	1	2495	3503
20140904-PurClathDigest-1ug-01	3508	34.017	25.405	930030	0	NaN	77309	0.37	-	-1		0	119	695.314976631926	2082.92310049598	3	MULTI	HCD	FTMS	0	0	0	-1	0	0	0	0	5				NaN	1	NaN	NaN	NaN	NaN	1011	0	1	2495	3503
20140904-PurClathDigest-1ug-01	3509	34.02	49.996	1061100	0	NaN	86019	0.38	-	-1		0	103	395.522689783513	2367.09247990148	6	MULTI	HCD	FTMS	0	0	0	-1	0	0	0	0	6				NaN	1	NaN	NaN	NaN	NaN	1012	0	1	2495	3503
20140904-PurClathDigest-1ug-01	3510	34.023	45.454	410750	0	NaN	69761	0.39	-	-1		0	101	910.771307894448	2729.29209428354	3	MULTI	HCD	FTMS	0	0	0	-1	0	0	0	0	7				NaN	1	NaN	NaN	NaN	NaN	1013	0	1	2495	3503
20140904-PurClathDigest-1ug-01	3512	34.035	3.071	18339000	0	NaN	4994600	0.36	+	3284	NNRPSEGPLQTR	12	87	685.344665193787	1368.67477745437	2	MULTI	HCD	FTMS	0	0	0	-1	0	0	0	0	1	Deamidation (NQ)	_N(de)NRPSEGPLQTR_	P49951;F1MPU0	102.062896728516	1	NaN	NaN	NaN	NaN	1014	0	1	2496	3511
20140904-PurClathDigest-1ug-01	3513	34.038	4.486	14882000	0	NaN	1322100	0.35	+	3366	QEADEATLAR	10	100	552.27037101677	1102.52618910034	2	MULTI	HCD	FTMS	0	0	0	-1	0	0	0	0	2	Unmodified	_QEADEATLAR_	Q28115	151.540100097656	1	NaN	NaN	NaN	NaN	1015	0	1	2496	3511
20140904-PurClathDigest-1ug-01	3514	34.041	16.73	1647900	0	NaN	154500	0.37	-	-1		0	110	837.871099442311	1673.72764595142	2	MULTI	HCD	FTMS	0	0	0	-1	0	0	0	0	3				NaN	1	NaN	NaN	NaN	NaN	1016	0	1	2496	3511
20140904-PurClathDigest-1ug-01	3515	34.044	38.149	721640	0	NaN	58430	0.39	-	-1		0	99	921.410425531047	1840.80629812889	2	MULTI	HCD	FTMS	0	0	0	-1	0	0	0	0	4				NaN	1	NaN	NaN	NaN	NaN	1017	0	1	2496	3511
20140904-PurClathDigest-1ug-01	3516	34.048	48.272	923590	0	NaN	271840	0.4	-	-1		0	89	721.376620958406	1440.73868898361	2	MULTI	HCD	FTMS	0	0	0	-1	0	0	0	0	5				NaN	1	NaN	NaN	NaN	NaN	1018	0	1	2496	3511
20140904-PurClathDigest-1ug-01	3517	34.051	37.396	1166900	0	NaN	113540	0.38	-	-1		0	123	614.609649650853	1840.80711955276	3	MULTI	HCD	FTMS	0	0	0	-1	0	0	0	0	6				NaN	1	NaN	NaN	NaN	NaN	1019	0	1	2496	3511
20140904-PurClathDigest-1ug-01	3518	34.055	49.03	1214900	0	NaN	151670	0.4	-	-1		0	111	530.758359609873	1059.50216628655	2	MULTI	HCD	FTMS	0	0	0	-1	0	0	0	0	7				NaN	1	NaN	NaN	NaN	NaN	1020	0	1	2496	3511
20140904-PurClathDigest-1ug-01	3520	34.067	18.989	3454500	0	NaN	596770	0.39	+	1195	GFQEPAPQK	9	85	501.256381070583	1000.49820920797	2	MULTI	HCD	FTMS	0	0	0	-1	0	0	0	0	1	Unmodified	_GFQEPAPQK_	G3MYP5	107.433502197266	1	NaN	NaN	NaN	NaN	1021	0	1	2497	3519
20140904-PurClathDigest-1ug-01	3521	34.07	22.946	3308400	0	NaN	645530	0.37	-	-1		0	95	513.221609401817	1024.42866587043	2	MULTI	HCD	FTMS	0	0	0	-1	0	0	0	0	2				NaN	1	NaN	NaN	NaN	NaN	1022	0	1	2497	3519
20140904-PurClathDigest-1ug-01	3522	34.073	25.695	1633300	0	NaN	225950	0.37	+	3726	SAVEDEGLK	9	89	474.237633348958	946.460713764717	2	MULTI	HCD	FTMS	0	0	0	-1	0	0	0	0	3	Unmodified	_SAVEDEGLK_	Q27965;Q27975	90.3966217041016	1	NaN	NaN	NaN	NaN	1023	0	1	2497	3519
20140904-PurClathDigest-1ug-01	3523	34.076	18.517	1326900	0	NaN	52346	0.37	-	-1		0	146	774.377853829032	3093.48230944973	4	MULTI	HCD	FTMS	0	0	0	-1	0	0	0	0	4				NaN	1	NaN	NaN	NaN	NaN	1024	0	1	2497	3519
20140904-PurClathDigest-1ug-01	3524	34.079	13.62	1294300	0	NaN	157510	0.36	-	-1		0	106	547.066794957076	2730.29759245238	5	MULTI	HCD	FTMS	0	0	0	-1	0	0	0	0	5				NaN	1	NaN	NaN	NaN	NaN	1025	0	1	2497	3519
20140904-PurClathDigest-1ug-01	3525	34.083	29.032	2417800	0	NaN	590600	0.37	+	-1	GLEVER	6	61	351.692814887029	701.371076840858	2	MULTI	HCD	FTMS	0	0	0	-1	0	0	0	0	6	Unmodified	_GLEVER_	F1MW90;G3MYP5	117.690399169922	1	NaN	NaN	NaN	NaN	1026	0	1	2497	3519
20140904-PurClathDigest-1ug-01	3526	34.086	19.32	2426000	0	NaN	70583	0.36	-	-1		0	177	619.703085034305	3093.47904283852	5	MULTI	HCD	FTMS	0	0	0	-1	0	0	0	0	7				NaN	1	NaN	NaN	NaN	NaN	1027	0	1	2497	3519
20140904-PurClathDigest-1ug-01	3528	34.097	12.356	3533100	0	NaN	124080	0.4	-	-1		0	164	562.286239130783	2245.11585065673	4	MULTI	HCD	FTMS	0	0	0	-1	0	0	0	0	1				NaN	1	NaN	NaN	NaN	NaN	1028	0	1	2498	3527
20140904-PurClathDigest-1ug-01	3529	34.101	13.151	1452200	0	NaN	72984	0.36	-	-1		0	116	749.378541256271	2245.11379436901	3	MULTI	HCD	FTMS	0	0	0	-1	0	0	0	0	2				NaN	1	NaN	NaN	NaN	NaN	1029	0	1	2498	3527
20140904-PurClathDigest-1ug-01	3530	34.104	13.61	4453000	0	NaN	447330	0.36	-	-1		0	113	401.207211528019	1200.59980518426	3	MULTI	HCD	FTMS	0	0	0	-1	0	0	0	0	3				NaN	1	NaN	NaN	NaN	NaN	1030	0	1	2498	3527
20140904-PurClathDigest-1ug-01	3531	34.107	14.336	1685700	0	NaN	394660	0.36	-	-1		0	58	481.253988637662	1440.74013651319	3	MULTI	HCD	FTMS	0	0	0	-1	0	0	0	0	4				NaN	1	NaN	NaN	NaN	NaN	1031	0	1	2498	3527
20140904-PurClathDigest-1ug-01	3532	34.11	19.629	3180500	0	NaN	273250	0.36	-	-1		0	77	370.667966516356	739.321380099512	2	MULTI	HCD	FTMS	0	0	0	-1	0	0	0	0	5				NaN	1	NaN	NaN	NaN	NaN	1032	0	1	2498	3527
20140904-PurClathDigest-1ug-01	3533	34.113	19.075	1452900	0	NaN	93392	0.36	-	-1		0	112	595.262791472072	1782.76654501641	3	MULTI	HCD	FTMS	0	0	0	-1	0	0	0	0	6				NaN	1	NaN	NaN	NaN	NaN	1033	0	1	2498	3527
20140904-PurClathDigest-1ug-01	3534	34.116	13.84	2687000	0	NaN	183110	0.36	+	2106	KHQALQAEIAGHEPR	15	103	421.977453459038	1683.88070796975	4	MULTI	HCD	FTMS	0	0	0	-1	0	0	0	0	7	Unmodified	_KHQALQAEIAGHEPR_	E1BFB0	89.0008010864258	1	NaN	NaN	NaN	NaN	1034	0	1	2498	3527
20140904-PurClathDigest-1ug-01	3536	34.127	6.028	3677000	0	NaN	340920	0.4	-	-1		0	72	435.87512738037	1304.60355274131	3	MULTI	HCD	FTMS	0	0	0	-1	0	0	0	0	1				NaN	1	NaN	NaN	NaN	NaN	1035	0	1	2499	3535
20140904-PurClathDigest-1ug-01	3537	34.13	9.806	24349000	0	NaN	4672400	0.36	+	4329	TRVMEYINR	9	169	599.305362160623	1196.59617138805	2	MULTI	HCD	FTMS	0	0	0	-1	0	0	0	0	2	Oxidation (M)	_TRVM(ox)EYINR_	P49951;F1MPU0	63.468620300293	1	NaN	NaN	NaN	NaN	1036	0	1	2499	3535
20140904-PurClathDigest-1ug-01	3538	34.133	10.237	7977000	0	NaN	834520	0.36	+	3998	SQYEQLAEQNRK	12	132	747.370837415386	1492.72712189757	2	MULTI	HCD	FTMS	0	0	0	-1	0	0	0	0	3	Unmodified	_SQYEQLAEQNRK_	CON__P13645	225.972305297852	1	NaN	NaN	NaN	NaN	1037	0	1	2499	3535
20140904-PurClathDigest-1ug-01	3539	34.136	5.647	15358000	0	NaN	706190	0.35	-	-1		0	171	588.795229644309	2351.15181271084	4	MULTI	HCD	FTMS	0	0	0	-1	0	0	0	0	4				NaN	1	NaN	NaN	NaN	NaN	1038	0	1	2499	3535
20140904-PurClathDigest-1ug-01	3540	34.139	5.165	2613100	0	NaN	138720	0.35	-	-1		0	99	492.981784389275	1967.8980316907	4	MULTI	HCD	FTMS	0	0	0	-1	0	0	0	0	5				NaN	1	NaN	NaN	NaN	NaN	1039	0	1	2499	3535
20140904-PurClathDigest-1ug-01	3541	34.142	7.16	32250000	0	NaN	1498000	0.35	-	-1		0	174	498.248787922987	1491.72453436916	3	MULTI	HCD	FTMS	0	0	0	-1	0	0	0	0	6				NaN	1	NaN	NaN	NaN	NaN	1040	0	1	2499	3535
20140904-PurClathDigest-1ug-01	3542	34.145	6.193	5142000	0	NaN	427800	0.35	-	-1		0	95	656.972974314289	1967.89709354307	3	MULTI	HCD	FTMS	0	0	0	-1	0	0	0	0	7				NaN	1	NaN	NaN	NaN	NaN	1041	0	1	2499	3535
20140904-PurClathDigest-1ug-01	3544	34.156	1.524	24493000	0	NaN	2966400	0.4	+	4331	TRVMEYINR	9	86	399.872960235934	1196.597051308	3	MULTI	HCD	FTMS	0	0	0	-1	0	0	0	0	1	Oxidation (M)	_TRVM(ox)EYINR_	P49951;F1MPU0	69.7602005004883	1	NaN	NaN	NaN	NaN	1042	0	1	2500	3543
20140904-PurClathDigest-1ug-01	3545	34.159	2.298	10963000	0	NaN	1808400	0.35	-	-1		0	114	648.672478109274	1942.99560492802	3	MULTI	HCD	FTMS	0	0	0	-1	0	0	0	0	2				NaN	1	NaN	NaN	NaN	NaN	1043	0	1	2500	3543
20140904-PurClathDigest-1ug-01	3546	34.162	2.88	11130000	0	NaN	507570	0.35	-	-1		0	111	784.72432809506	2351.15115488538	3	MULTI	HCD	FTMS	0	0	0	-1	0	0	0	0	3				NaN	1	NaN	NaN	NaN	NaN	1044	0	1	2500	3543
20140904-PurClathDigest-1ug-01	3547	34.165	4.1	29963000	0	NaN	6644000	0.35	+	2739	LLEGEETR	8	108	473.745709499559	945.476866065918	2	MULTI	HCD	FTMS	0	0	0	-1	0	0	0	0	4	Unmodified	_LLEGEETR_	F1MDZ2;O77788;Q08DH7;P02548	168.024597167969	1	NaN	NaN	NaN	NaN	1045	0	1	2500	3543
20140904-PurClathDigest-1ug-01	3548	34.168	5.12	29283000	0	NaN	4369000	0.35	-	-1		0	122	489.771997011571	977.529441089942	2	MULTI	HCD	FTMS	0	0	0	-1	0	0	0	0	5				NaN	1	NaN	NaN	NaN	NaN	1046	0	1	2500	3543
20140904-PurClathDigest-1ug-01	3549	34.171	6.552	16120000	0	NaN	1260600	0.35	+	1205	GGQVQIVTK	9	115	465.274659610775	928.53476628835	2	MULTI	HCD	FTMS	0	0	0	-1	0	0	0	0	6	Unmodified	_GGQVQIVTK_	F1MEW3	123.848197937012	1	NaN	NaN	NaN	NaN	1047	0	1	2500	3543
20140904-PurClathDigest-1ug-01	3550	34.173	6.968	4679400	0	NaN	717390	0.35	+	3771	SGGGGGGGLGSGGSIR	16	98	616.801321756066	1231.58809057893	2	MULTI	HCD	FTMS	0	0	0	-1	0	0	0	0	7	Unmodified	_SGGGGGGGLGSGGSIR_	CON__P35527	96.8463363647461	1	NaN	NaN	NaN	NaN	1048	0	1	2500	3543
20140904-PurClathDigest-1ug-01	3552	34.184	7.508	2926700	0	NaN	435220	0.41	+	26	AATASPPTDGTSGYSAR	17	80	805.376302395423	1608.73805185765	2	MULTI	HCD	FTMS	0	0	0	-1	0	0	0	0	1	Unmodified	_AATASPPTDGTSGYSAR_	F1N3M8;G3MYP5	120.464698791504	1	NaN	NaN	NaN	NaN	1049	0	1	2501	3551
20140904-PurClathDigest-1ug-01	3553	34.188	5.145	9311700	0	NaN	1356700	0.34	-	-1		0	101	408.866681718866	1223.5782157568	3	MULTI	HCD	FTMS	0	0	0	-1	0	0	0	0	2				NaN	1	NaN	NaN	NaN	NaN	1050	0	1	2501	3551
20140904-PurClathDigest-1ug-01	3554	34.191	10.097	4897800	0	NaN	359200	0.36	+	3584	RPISADSAIMNPASK	15	134	787.403556240554	1572.79255954791	2	MULTI	HCD	FTMS	0	0	0	-1	0	0	0	0	3	Oxidation (M)	_RPISADSAIM(ox)NPASK_	P49951;F1MPU0	116.404998779297	1	NaN	NaN	NaN	NaN	1051	0	1	2501	3551
20140904-PurClathDigest-1ug-01	3555	34.194	10.781	3283600	0	NaN	937470	0.36	-	-1		0	95	697.860130344238	1393.70570775528	2	MULTI	HCD	FTMS	0	0	0	-1	0	0	0	0	4				NaN	1	NaN	NaN	NaN	NaN	1052	0	1	2501	3551
20140904-PurClathDigest-1ug-01	3556	34.197	4.698	3767900	0	NaN	191700	0.35	-	-1		0	114	527.658677679457	2633.25700606429	5	MULTI	HCD	FTMS	0	0	0	-1	0	0	0	0	5				NaN	1	NaN	NaN	NaN	NaN	1053	0	1	2501	3551
20140904-PurClathDigest-1ug-01	3557	34.2	7.034	2458400	0	NaN	138710	0.36	-	-1		0	102	659.321412184293	2633.25654287077	4	MULTI	HCD	FTMS	0	0	0	-1	0	0	0	0	6				NaN	1	NaN	NaN	NaN	NaN	1054	0	1	2501	3551
20140904-PurClathDigest-1ug-01	3558	34.202	8.26	2389700	0	NaN	296930	0.36	-	-1		0	115	486.75652584164	1942.99699750016	4	MULTI	HCD	FTMS	0	0	0	-1	0	0	0	0	7				NaN	1	NaN	NaN	NaN	NaN	1055	0	1	2501	3551
20140904-PurClathDigest-1ug-01	3560	34.214	5.184	6408000	0	NaN	1876800	0.38	+	463	AVEQKEEAVLEK	12	101	458.248735844249	1371.72437813295	3	MULTI	HCD	FTMS	0	0	0	-1	0	0	0	0	1	Unmodified	_AVEQKEEAVLEK_	F1N3M8;G3MYP5	55.2836608886719	1	NaN	NaN	NaN	NaN	1056	0	1	2502	3559
20140904-PurClathDigest-1ug-01	3561	34.217	3.873	2548900	0	NaN	813860	0.35	-	-1		0	52	471.437950877246	2352.15337205323	5	MULTI	HCD	FTMS	0	0	0	-1	0	0	0	0	2				NaN	1	NaN	NaN	NaN	NaN	1057	0	1	2502	3559
20140904-PurClathDigest-1ug-01	3562	34.22	6.087	321900	0	NaN	46143	0.35	-	-1		0	25	326.85033210187	977.52916690581	3	MULTI	HCD	FTMS	0	0	0	-1	0	0	0	0	3				NaN	1	NaN	NaN	NaN	NaN	1058	0	1	2502	3559
20140904-PurClathDigest-1ug-01	3563	34.223	6.867	2182000	0	NaN	169020	0.35	+	3585	RPISADSAIMNPASK	15	74	525.271457362663	1572.79254268819	3	MULTI	HCD	FTMS	0	0	0	-1	0	0	0	0	4	Oxidation (M)	_RPISADSAIM(ox)NPASK_	P49951;F1MPU0	88.5140914916992	1	NaN	NaN	NaN	NaN	1059	0	1	2502	3559
20140904-PurClathDigest-1ug-01	3564	34.226	9.218	2481900	0	NaN	405650	0.36	-	-1		0	83	428.19873141464	1708.76581979216	4	MULTI	HCD	FTMS	0	0	0	-1	0	0	0	0	5				NaN	1	NaN	NaN	NaN	NaN	1060	0	1	2502	3559
20140904-PurClathDigest-1ug-01	3565	34.228	22.163	1159800	0	NaN	173710	0.37	-	-1		0	91	731.868267530598	1461.721982128	2	MULTI	HCD	FTMS	0	0	0	-1	0	0	0	0	6				NaN	1	NaN	NaN	NaN	NaN	1061	0	1	2502	3559
20140904-PurClathDigest-1ug-01	3566	34.232	12.825	4014400	0	NaN	451240	0.36	-	-1		0	168	609.302014353355	1824.88421366026	3	MULTI	HCD	FTMS	0	0	0	-1	0	0	0	0	7				NaN	1	NaN	NaN	NaN	NaN	1062	0	1	2502	3559
20140904-PurClathDigest-1ug-01	3568	34.243	6.901	8662500	0	NaN	703920	0.38	+	3286	NNRPSEGPLQTR	12	130	457.232624835299	1368.6760451061	3	MULTI	HCD	FTMS	0	0	0	-1	0	0	0	0	1	Deamidation (NQ)	_N(de)NRPSEGPLQTR_	P49951;F1MPU0	176.94970703125	1	NaN	NaN	NaN	NaN	1063	0	1	2503	3567
20140904-PurClathDigest-1ug-01	3569	34.246	11.629	6704300	0	NaN	494440	0.36	+	1256	GMIKEESVQIK	11	143	639.342019886831	1276.66948684046	2	MULTI	HCD	FTMS	0	0	0	-1	0	0	0	0	2	Oxidation (M)	_GM(ox)IKEESVQIK_	F1MEW3	113.789100646973	1	NaN	NaN	NaN	NaN	1064	0	1	2503	3567
20140904-PurClathDigest-1ug-01	3570	34.249	12.177	937040	0	NaN	83534	0.36	-	-1		0	92	913.451099843313	1824.88764675343	2	MULTI	HCD	FTMS	0	0	0	-1	0	0	0	0	3				NaN	1	NaN	NaN	NaN	NaN	1065	0	1	2503	3567
20140904-PurClathDigest-1ug-01	3571	34.252	10.41	7539500	0	NaN	298300	0.36	+	1257	GMIKEESVQIK	11	149	426.56413922984	1276.67058828972	3	MULTI	HCD	FTMS	0	0	0	-1	0	0	0	0	4	Oxidation (M)	_GM(ox)IKEESVQIK_	F1MEW3	57.844898223877	1	NaN	NaN	NaN	NaN	1066	0	1	2503	3567
20140904-PurClathDigest-1ug-01	3572	34.255	10.806	5284800	0	NaN	533350	0.36	-	-1		0	124	570.59610633869	1708.76648961627	3	MULTI	HCD	FTMS	0	0	0	-1	0	0	0	0	5				NaN	1	NaN	NaN	NaN	NaN	1067	0	1	2503	3567
20140904-PurClathDigest-1ug-01	3573	34.258	17.905	11680000	0	NaN	1532700	0.37	-	-1		0	140	530.780491326962	1059.54642972072	2	MULTI	HCD	FTMS	0	0	0	-1	0	0	0	0	6				NaN	1	NaN	NaN	NaN	NaN	1068	0	1	2503	3567
20140904-PurClathDigest-1ug-01	3574	34.261	24.416	2411500	0	NaN	636210	0.37	-	-1		0	95	539.725640826087	1077.43672871897	2	MULTI	HCD	FTMS	0	0	0	-1	0	0	0	0	7				NaN	1	NaN	NaN	NaN	NaN	1069	0	1	2503	3567
20140904-PurClathDigest-1ug-01	3576	34.272	2.381	25245000	0	NaN	5576300	0.39	+	3288	NNRPSEGPLQTR	12	97	685.344013703909	1368.67347447462	2	MULTI	HCD	FTMS	0	0	0	-1	0	0	0	0	1	Deamidation (NQ)	_N(de)NRPSEGPLQTR_	P49951;F1MPU0	94.5290832519531	1	NaN	NaN	NaN	NaN	1070	0	1	2504	3575
20140904-PurClathDigest-1ug-01	3577	34.276	14.174	2120900	0	NaN	218520	0.36	-	-1		0	141	889.413074227109	1776.81159552102	2	MULTI	HCD	FTMS	0	0	0	-1	0	0	0	0	2				NaN	1	NaN	NaN	NaN	NaN	1071	0	1	2504	3575
20140904-PurClathDigest-1ug-01	3578	34.279	20.622	1141900	0	NaN	198170	0.37	-	-1		0	111	791.349682491639	1580.68481205008	2	MULTI	HCD	FTMS	0	0	0	-1	0	0	0	0	3				NaN	1	NaN	NaN	NaN	NaN	1072	0	1	2504	3575
20140904-PurClathDigest-1ug-01	3579	34.282	16.31	4837100	0	NaN	882210	0.36	-	-1		0	74	417.776252649992	833.537952366785	2	MULTI	HCD	FTMS	0	0	0	-1	0	0	0	0	4				NaN	1	NaN	NaN	NaN	NaN	1073	0	1	2504	3575
20140904-PurClathDigest-1ug-01	3580	34.285	15.151	2099900	0	NaN	132680	0.36	+	395	ARHDEYLEVTK	11	99	454.234064836425	1359.68036510948	3	MULTI	HCD	FTMS	0	0	0	-1	0	0	0	0	5	Unmodified	_ARHDEYLEVTK_	G3MYP5	75.5010375976563	1	NaN	NaN	NaN	NaN	1074	0	1	2504	3575
20140904-PurClathDigest-1ug-01	3581	34.288	26.911	609920	0	NaN	50494	0.38	-	-1		0	81	921.410425531047	1840.80629812889	2	MULTI	HCD	FTMS	0	0	0	-1	0	0	0	0	6				NaN	1	NaN	NaN	NaN	NaN	1075	0	1	2504	3575
20140904-PurClathDigest-1ug-01	3582	34.291	16.345	714550	0	NaN	98699	0.36	+	3108	NKDDLTLSR	9	57	354.524554250361	1060.55183335128	3	MULTI	HCD	FTMS	0	0	0	-1	0	0	0	0	7	Unmodified	_NKDDLTLSR_	F1MEW3	64.8416290283203	1	NaN	NaN	NaN	NaN	1076	0	1	2504	3575
20140904-PurClathDigest-1ug-01	3584	34.302	1.05	130830000	0	NaN	16255000	0.39	+	4727	VMEYINR	7	106	470.731193761123	939.447834589046	2	MULTI	HCD	FTMS	0	0	0	-1	0	0	0	0	1	Oxidation (M)	_VM(ox)EYINR_	P49951;F1MPU0	112.136703491211	1	NaN	NaN	NaN	NaN	1077	0	1	2505	3583
20140904-PurClathDigest-1ug-01	3585	34.306	6.721	7684300	0	NaN	1173200	0.35	-	-1		0	157	602.638858064911	1804.89474479493	3	MULTI	HCD	FTMS	0	0	0	-1	0	0	0	0	2				NaN	1	NaN	NaN	NaN	NaN	1078	0	1	2505	3583
20140904-PurClathDigest-1ug-01	3586	34.309	6.882	779020	0	NaN	67229	0.35	-	-1		0	64	445.21004743798	1776.81108388552	4	MULTI	HCD	FTMS	0	0	0	-1	0	0	0	0	3				NaN	1	NaN	NaN	NaN	NaN	1079	0	1	2505	3583
20140904-PurClathDigest-1ug-01	3587	34.312	12.94	4537800	0	NaN	937670	0.36	-	-1		0	120	581.75580162338	1161.49705031356	2	MULTI	HCD	FTMS	0	0	0	-1	0	0	0	0	4				NaN	1	NaN	NaN	NaN	NaN	1080	0	1	2505	3583
20140904-PurClathDigest-1ug-01	3588	34.314	9.808	2438700	0	NaN	182900	0.36	-	-1		0	92	432.892276619528	1295.65500045878	3	MULTI	HCD	FTMS	0	0	0	-1	0	0	0	0	5				NaN	1	NaN	NaN	NaN	NaN	1081	0	1	2505	3583
20140904-PurClathDigest-1ug-01	3589	34.317	9.948	3423300	0	NaN	416500	0.36	+	398	ARVDHGAEIITQSPGR	16	86	569.636042876131	1705.88629922859	3	MULTI	HCD	FTMS	0	0	0	-1	0	0	0	0	6	Unmodified	_ARVDHGAEIITQSPGR_	F1MEW3	94.5628433227539	1	NaN	NaN	NaN	NaN	1082	0	1	2505	3583
20140904-PurClathDigest-1ug-01	3590	34.32	17.436	1790500	0	NaN	233550	0.37	-	-1		0	123	745.817924242639	1489.62129555208	2	MULTI	HCD	FTMS	0	0	0	-1	0	0	0	0	7				NaN	1	NaN	NaN	NaN	NaN	1083	0	1	2505	3583
20140904-PurClathDigest-1ug-01	3592	34.331	0.707	105250000	0	NaN	26407000	0.4	+	2855	LQSEPESIR	9	97	529.777481908886	1057.54041088457	2	MULTI	HCD	FTMS	0	0	0	-1	0	0	0	0	1	Unmodified	_LQSEPESIR_	P04973	159.425506591797	1	NaN	NaN	NaN	NaN	1084	0	1	2506	3591
20140904-PurClathDigest-1ug-01	3593	34.335	7.155	8695900	0	NaN	966660	0.35	-	-1		0	99	513.221764371984	1024.42897581077	2	MULTI	HCD	FTMS	0	0	0	-1	0	0	0	0	2				NaN	1	NaN	NaN	NaN	NaN	1085	0	1	2506	3591
20140904-PurClathDigest-1ug-01	3594	34.338	7.599	3979100	0	NaN	691840	0.36	-	-1		0	131	903.454788648586	1804.89502436397	2	MULTI	HCD	FTMS	0	0	0	-1	0	0	0	0	3				NaN	1	NaN	NaN	NaN	NaN	1086	0	1	2506	3591
20140904-PurClathDigest-1ug-01	3595	34.341	11.257	1470400	0	NaN	157090	0.35	-	-1		0	54	438.732575313081	875.450597692961	2	MULTI	HCD	FTMS	0	0	0	-1	0	0	0	0	4				NaN	1	NaN	NaN	NaN	NaN	1087	0	1	2506	3591
20140904-PurClathDigest-1ug-01	3596	34.344	7.818	4759800	0	NaN	518630	0.35	-	-1		0	124	497.547588191632	1489.6209351751	3	MULTI	HCD	FTMS	0	0	0	-1	0	0	0	0	5				NaN	1	NaN	NaN	NaN	NaN	1088	0	1	2506	3591
20140904-PurClathDigest-1ug-01	3597	34.346	14.642	2621400	0	NaN	540770	0.36	-	-1		0	90	741.808486599836	1481.60242026647	2	MULTI	HCD	FTMS	0	0	0	-1	0	0	0	0	6				NaN	1	NaN	NaN	NaN	NaN	1089	0	1	2506	3591
20140904-PurClathDigest-1ug-01	3598	34.35	12.394	4783400	0	NaN	444340	0.35	+	4674	VKNFLK	6	73	374.739538953466	747.464524973732	2	MULTI	HCD	FTMS	0	0	0	-1	0	0	0	0	7	Unmodified	_VKNFLK_	P49951;F1MPU0	64.2208633422852	1	NaN	NaN	NaN	NaN	1090	0	1	2506	3591
20140904-PurClathDigest-1ug-01	3600	34.361	7.534	4708500	0	NaN	337530	0.4	-	-1		0	126	588.795229644309	2351.15181271084	4	MULTI	HCD	FTMS	0	0	0	-1	0	0	0	0	1				NaN	1	NaN	NaN	NaN	NaN	1091	0	1	2507	3599
20140904-PurClathDigest-1ug-01	3601	34.364	11.265	1126600	0	NaN	755070	0.36	-	-1		0	37	550.256351019123	1647.74722365757	3	MULTI	HCD	FTMS	0	0	0	-1	0	0	0	0	2				NaN	1	NaN	NaN	NaN	NaN	1092	0	1	2507	3599
20140904-PurClathDigest-1ug-01	3602	34.367	17.262	3353300	0	NaN	989800	0.37	+	4330	TRVMEYINR	9	129	599.305362160623	1196.59617138805	2	MULTI	HCD	FTMS	0	0	0	-1	0	0	0	0	3	Oxidation (M)	_TRVM(ox)EYINR_	P49951;F1MPU0	66.5139236450195	1	NaN	NaN	NaN	NaN	1093	0	1	2507	3599
20140904-PurClathDigest-1ug-01	3603	34.37	19.093	1387800	0	NaN	210960	0.37	-	-1		0	108	677.345955608725	1352.67735828425	2	MULTI	HCD	FTMS	0	0	0	-1	0	0	0	0	4				NaN	1	NaN	NaN	NaN	NaN	1094	0	1	2507	3599
20140904-PurClathDigest-1ug-01	3604	34.373	16.166	75174	0	NaN	7605	0.37	-	-1		0	26	1155.06836300404	2308.12217307487	2	MULTI	HCD	FTMS	0	0	0	-1	0	0	0	0	5				NaN	1	NaN	NaN	NaN	NaN	1095	0	1	2507	3599
20140904-PurClathDigest-1ug-01	3605	34.376	21.409	928470	0	NaN	58543	0.37	-	-1		0	96	648.834758711388	NaN	0	PEAK	HCD	FTMS	0	0	0	-1	0	0	0	0	6				NaN	1	NaN	NaN	NaN	NaN	1096	0	1	2507	3599
20140904-PurClathDigest-1ug-01	3606	34.379	17.198	1441700	0	NaN	353760	0.36	-	-1		0	94	494.874601366918	1481.60197470095	3	MULTI	HCD	FTMS	0	0	0	-1	0	0	0	0	7				NaN	1	NaN	NaN	NaN	NaN	1097	0	1	2507	3599
20140904-PurClathDigest-1ug-01	3608	34.391	15.498	2274500	0	NaN	330250	0.41	-	-1		0	115	783.351958803093	1564.68936467299	2	MULTI	HCD	FTMS	0	0	0	-1	0	0	0	0	1				NaN	1	NaN	NaN	NaN	NaN	1098	0	1	2508	3607
20140904-PurClathDigest-1ug-01	3609	34.394	10.297	1289500	0	NaN	108700	0.36	-	-1		0	92	913.099021339989	2736.27523462017	3	MULTI	HCD	FTMS	0	0	0	-1	0	0	0	0	2				NaN	1	NaN	NaN	NaN	NaN	1099	0	1	2508	3607
20140904-PurClathDigest-1ug-01	3610	34.397	18.802	82269	0	NaN	8447.6	0.37	-	-1		0	27	1000.48083007997	1998.94710722674	2	MULTI	HCD	FTMS	0	0	0	-1	0	0	0	0	3				NaN	1	NaN	NaN	NaN	NaN	1100	0	1	2508	3607
20140904-PurClathDigest-1ug-01	3611	34.4	24.67	766080	0	NaN	59955	0.37	-	-1		0	88	824.881939866924	1647.74932680065	2	MULTI	HCD	FTMS	0	0	0	-1	0	0	0	0	4				NaN	1	NaN	NaN	NaN	NaN	1101	0	1	2508	3607
20140904-PurClathDigest-1ug-01	3612	34.403	18.814	68817	0	NaN	6854.1	0.37	-	-1		0	25	1215.09743521515	2428.18031749709	2	MULTI	HCD	FTMS	0	0	0	-1	0	0	0	0	5				NaN	1	NaN	NaN	NaN	NaN	1102	0	1	2508	3607
20140904-PurClathDigest-1ug-01	3613	34.407	27.806	975030	0	NaN	70003	0.37	-	-1		0	95	454.74028538187	907.466017830539	2	MULTI	HCD	FTMS	0	0	0	-1	0	0	0	0	6				NaN	1	NaN	NaN	NaN	NaN	1103	0	1	2508	3607
20140904-PurClathDigest-1ug-01	3614	34.41	24.493	1027000	0	NaN	153740	0.37	-	-1		0	87	520.772350163837	NaN	0	PEAK	HCD	FTMS	0	0	0	-1	0	0	0	0	7				NaN	1	NaN	NaN	NaN	NaN	1104	0	1	2508	3607
20140904-PurClathDigest-1ug-01	3616	34.421	19.418	640280	0	NaN	66533	0.39	-	-1		0	60	891.437441053593	4452.15082293497	5	MULTI	HCD	FTMS	0	0	0	-1	0	0	0	0	1				NaN	1	NaN	NaN	NaN	NaN	1105	0	1	2509	3615
20140904-PurClathDigest-1ug-01	3617	34.425	34.496	2067500	0	NaN	151720	0.38	+	3888	SNEKEQLQGLNDR	13	136	765.878474981237	1529.74239702927	2	MULTI	HCD	FTMS	0	0	0	-1	0	0	0	0	2	Unmodified	_SNEKEQLQGLNDR_	F1MDZ2	242.05029296875	1	NaN	NaN	NaN	NaN	1106	0	1	2509	3615
20140904-PurClathDigest-1ug-01	3618	34.428	18.339	156010	0	NaN	43697	0.37	-	-1		0	32	1163.90972324206	NaN	0	PEAK	HCD	FTMS	0	0	0	-1	0	0	0	0	3				NaN	1	NaN	NaN	NaN	NaN	1107	0	1	2509	3615
20140904-PurClathDigest-1ug-01	3619	34.431	27.312	4248200	0	NaN	267460	0.37	-	-1		0	172	497.266824467516	1488.77864400275	3	MULTI	HCD	FTMS	0	0	0	-1	0	0	0	0	4				NaN	1	NaN	NaN	NaN	NaN	1108	0	1	2509	3615
20140904-PurClathDigest-1ug-01	3620	34.434	15.34	1194100	0	NaN	133970	0.36	-	-1		0	111	630.10305983326	3145.4789168333	5	MULTI	HCD	FTMS	0	0	0	-1	0	0	0	0	5				NaN	1	NaN	NaN	NaN	NaN	1109	0	1	2509	3615
20140904-PurClathDigest-1ug-01	3621	34.438	37.633	2564600	0	NaN	514800	0.38	+	3751	SEITELRR	8	118	502.280298665658	1002.54604439812	2	MULTI	HCD	FTMS	0	0	0	-1	0	0	0	0	6	Unmodified	_SEITELRR_	P06394;A6QNZ7;CON__P02535-1;CON__P13645	173.790802001953	1	NaN	NaN	NaN	NaN	1110	0	1	2509	3615
20140904-PurClathDigest-1ug-01	3622	34.441	47.083	1031900	0	NaN	148310	0.4	+	3842	SKFANLNEQAAR	12	121	674.852402169715	1347.69025140623	2	MULTI	HCD	FTMS	0	0	0	-1	0	0	0	0	7	Unmodified	_SKFANLNEQAAR_	Q08DH7	168.14599609375	1	NaN	NaN	NaN	NaN	1111	0	1	2509	3615
20140904-PurClathDigest-1ug-01	3624	34.453	8.47	11419000	0	NaN	2229800	0.39	+	2940	LTQEPESIR	9	105	536.784898277178	1071.55524362116	2	MULTI	HCD	FTMS	0	0	0	-1	0	0	0	0	1	Unmodified	_LTQEPESIR_	G3N252;P04975	155.016998291016	1	NaN	NaN	NaN	NaN	1112	0	1	2510	3623
20140904-PurClathDigest-1ug-01	3625	34.456	15.982	3527900	0	NaN	247810	0.36	-	-1		0	111	745.396661605679	1488.77877027816	2	MULTI	HCD	FTMS	0	0	0	-1	0	0	0	0	2				NaN	1	NaN	NaN	NaN	NaN	1113	0	1	2510	3623
20140904-PurClathDigest-1ug-01	3626	34.459	15.92	1027000	0	NaN	99547	0.36	-	-1		0	82	522.570996840587	1564.69116112196	3	MULTI	HCD	FTMS	0	0	0	-1	0	0	0	0	3				NaN	1	NaN	NaN	NaN	NaN	1114	0	1	2510	3623
20140904-PurClathDigest-1ug-01	3627	34.462	19.98	3972100	0	NaN	487100	0.37	+	3890	SNEKEQLQGLNDR	13	136	510.922278040684	1529.74500472225	3	MULTI	HCD	FTMS	0	0	0	-1	0	0	0	0	4	Unmodified	_SNEKEQLQGLNDR_	F1MDZ2	152.748794555664	1	NaN	NaN	NaN	NaN	1115	0	1	2510	3623
20140904-PurClathDigest-1ug-01	3628	34.465	41.9	866250	0	NaN	102370	0.39	-	-1		0	122	833.882590387438	1665.75062784168	2	MULTI	HCD	FTMS	0	0	0	-1	0	0	0	0	5				NaN	1	NaN	NaN	NaN	NaN	1116	0	1	2510	3623
20140904-PurClathDigest-1ug-01	3629	34.469	29.812	1954600	0	NaN	296980	0.37	+	3752	SEITELRR	8	93	335.18918078147	1002.54571294461	3	MULTI	HCD	FTMS	0	0	0	-1	0	0	0	0	6	Unmodified	_SEITELRR_	P06394;A6QNZ7;CON__P02535-1;CON__P13645	89.2916412353516	1	NaN	NaN	NaN	NaN	1117	0	1	2510	3623
20140904-PurClathDigest-1ug-01	3630	34.472	29.447	1444300	0	NaN	143280	0.37	+	2970	LVDTGDKFR	9	81	350.857389326987	1049.55033858116	3	MULTI	HCD	FTMS	0	0	0	-1	0	0	0	0	7	Unmodified	_LVDTGDKFR_	F1MYC9	102.384300231934	1	NaN	NaN	NaN	NaN	1118	0	1	2510	3623
20140904-PurClathDigest-1ug-01	3632	34.484	5.891	6560100	0	NaN	568050	0.38	+	3287	NNRPSEGPLQTR	12	107	457.232624835299	1368.6760451061	3	MULTI	HCD	FTMS	0	0	0	-1	0	0	0	0	1	Deamidation (NQ)	_N(de)NRPSEGPLQTR_	P49951;F1MPU0	123.381698608398	1	NaN	NaN	NaN	NaN	1119	0	1	2511	3631
20140904-PurClathDigest-1ug-01	3633	34.487	23.313	1002600	0	NaN	98441	0.37	-	-1		0	107	595.344576832428	1783.01190109748	3	MULTI	HCD	FTMS	0	0	0	-1	0	0	0	0	2				NaN	1	NaN	NaN	NaN	NaN	1120	0	1	2511	3631
20140904-PurClathDigest-1ug-01	3634	34.49	29.768	1677600	0	NaN	510380	0.37	-	-1		0	60	352.69490249058	703.37525204796	2	MULTI	HCD	FTMS	0	0	0	-1	0	0	0	0	3				NaN	1	NaN	NaN	NaN	NaN	1121	0	1	2511	3631
20140904-PurClathDigest-1ug-01	3635	34.493	29.53	773580	0	NaN	51046	0.37	+	1201	GGGGGGYGSGGSSYGSGGGSYGSGGGGGGGR	31	104	1192.48132318532	2382.94809343745	2	MULTI	HCD	FTMS	0	0	0	-1	0	0	0	0	4	Unmodified	_GGGGGGYGSGGSSYGSGGGSYGSGGGGGGGR_	CON__P04264	132.792495727539	1	NaN	NaN	NaN	NaN	1122	0	1	2511	3631
20140904-PurClathDigest-1ug-01	3636	34.497	30.531	639010	0	NaN	107260	0.38	-	-1		0	80	446.760655213981	1783.01351498953	4	MULTI	HCD	FTMS	0	0	0	-1	0	0	0	0	5				NaN	1	NaN	NaN	NaN	NaN	1123	0	1	2511	3631
20140904-PurClathDigest-1ug-01	3637	34.5	38.631	545730	0	NaN	34036	0.39	-	-1		0	104	556.256896146537	1665.74885903981	3	MULTI	HCD	FTMS	0	0	0	-1	0	0	0	0	6				NaN	1	NaN	NaN	NaN	NaN	1124	0	1	2511	3631
20140904-PurClathDigest-1ug-01	3638	34.503	31.625	177580	0	NaN	24360	0.38	-	-1		0	51	491.263458705483	1470.76854671665	3	MULTI	HCD	FTMS	0	0	0	-1	0	0	0	0	7				NaN	1	NaN	NaN	NaN	NaN	1125	0	1	2511	3631
20140904-PurClathDigest-1ug-01	3640	34.515	29.844	2079400	0	NaN	557230	0.41	-	-1		0	106	607.303210332102	1212.591867731	2	MULTI	HCD	FTMS	0	0	0	-1	0	0	0	0	1				NaN	1	NaN	NaN	NaN	NaN	1126	0	1	2512	3639
20140904-PurClathDigest-1ug-01	3641	34.519	38.338	92802	0	NaN	38236	0.39	-	-1		0	25	1066.53453143411	2131.05450993501	2	MULTI	HCD	FTMS	0	0	0	-1	0	0	0	0	2				NaN	1	NaN	NaN	NaN	NaN	1127	0	1	2512	3639
20140904-PurClathDigest-1ug-01	3642	34.522	42.937	1690800	0	NaN	142810	0.39	+	2108	KIDLSHVTSK	10	126	376.55214515614	1126.63460606862	3	MULTI	HCD	FTMS	0	0	0	-1	0	0	0	0	3	Unmodified	_KIDLSHVTSK_	F1MEW3	89.9056701660156	1	NaN	NaN	NaN	NaN	1128	0	1	2512	3639
20140904-PurClathDigest-1ug-01	3643	34.526	50.14	1796800	0	NaN	392490	0.4	-	-1		0	86	424.179448443142	846.344343953085	2	MULTI	HCD	FTMS	0	0	0	-1	0	0	0	0	4				NaN	1	NaN	NaN	NaN	NaN	1129	0	1	2512	3639
20140904-PurClathDigest-1ug-01	3644	34.529	45.437	282810	0	NaN	27829	0.39	+	3843	SKFANLNEQAAR	12	75	450.2373589775	1347.6902475327	3	MULTI	HCD	FTMS	0	0	0	-1	0	0	0	0	5	Unmodified	_SKFANLNEQAAR_	Q08DH7	116.586196899414	1	NaN	NaN	NaN	NaN	1130	0	1	2512	3639
20140904-PurClathDigest-1ug-01	3645	34.533	50.118	1130600	0	NaN	98286	0.4	-	-1		0	111	405.204765314523	1212.59246654377	3	MULTI	HCD	FTMS	0	0	0	-1	0	0	0	0	6				NaN	1	NaN	NaN	NaN	NaN	1131	0	1	2512	3639
20140904-PurClathDigest-1ug-01	3646	34.536	68.998	256790	0	NaN	90828	0.42	-	-1		0	73	616.83056177094	1231.64657060868	2	MULTI	HCD	FTMS	0	0	0	-1	0	0	0	0	7				NaN	1	NaN	NaN	NaN	NaN	1132	0	1	2512	3639
20140904-PurClathDigest-1ug-01	3648	34.548	0.492	193540000	0	NaN	28063000	0.39	+	4728	VMEYINR	7	92	470.731193761123	939.447834589046	2	MULTI	HCD	FTMS	0	0	0	-1	0	0	0	0	1	Oxidation (M)	_VM(ox)EYINR_	P49951;F1MPU0	108.91259765625	1	NaN	NaN	NaN	NaN	1133	0	1	2513	3647
20140904-PurClathDigest-1ug-01	3649	34.552	20.226	2991300	0	NaN	551690	0.37	+	3701	SAKEEIAEYR	10	95	598.301179534467	1194.58780613573	2	MULTI	HCD	FTMS	0	0	0	-1	0	0	0	0	2	Unmodified	_SAKEEIAEYR_	F1MDZ2;O77788	174.679397583008	1	NaN	NaN	NaN	NaN	1134	0	1	2513	3647
20140904-PurClathDigest-1ug-01	3650	34.555	23.774	3577300	0	NaN	238900	0.37	+	2109	KIDLSHVTSK	10	128	564.324194920517	1126.63383690783	2	MULTI	HCD	FTMS	0	0	0	-1	0	0	0	0	3	Unmodified	_KIDLSHVTSK_	F1MEW3	152.756698608398	1	NaN	NaN	NaN	NaN	1135	0	1	2513	3647
20140904-PurClathDigest-1ug-01	3651	34.558	34.439	835410	0	NaN	247700	0.37	-	-1		0	34	329.200207756426	656.385862579652	2	MULTI	HCD	FTMS	0	0	0	-1	0	0	0	0	4				NaN	1	NaN	NaN	NaN	NaN	1136	0	1	2513	3647
20140904-PurClathDigest-1ug-01	3652	34.561	59.786	37432	0	NaN	17305	0.41	-	-1		0	22	1066.53453143411	2131.05450993501	2	MULTI	HCD	FTMS	0	0	0	-1	0	0	0	0	5				NaN	1	NaN	NaN	NaN	NaN	1137	0	1	2513	3647
20140904-PurClathDigest-1ug-01	3653	34.565	55.269	1058000	0	NaN	71517	0.4	+	4189	TATDEAYKDPSNLQGK	16	166	869.419077979912	1736.82360302662	2	MULTI	HCD	FTMS	0	0	0	-1	0	0	0	0	6	Unmodified	_TATDEAYKDPSNLQGK_	E1BFB0	260.062286376953	1	NaN	NaN	NaN	NaN	1138	0	1	2513	3647
20140904-PurClathDigest-1ug-01	3654	34.569	53.282	103480	0	NaN	11050	0.4	-	-1		0	59	480.243237174278	958.471921415357	2	MULTI	HCD	FTMS	0	0	0	-1	0	0	0	0	7				NaN	1	NaN	NaN	NaN	NaN	1139	0	1	2513	3647
20140904-PurClathDigest-1ug-01	3656	34.58	1.208	52329000	0	NaN	13014000	0.39	+	2856	LQSEPESIR	9	96	529.777481908886	1057.54041088457	2	MULTI	HCD	FTMS	0	0	0	-1	0	0	0	0	1	Unmodified	_LQSEPESIR_	P04973	129.389099121094	1	NaN	NaN	NaN	NaN	1140	0	1	2514	3655
20140904-PurClathDigest-1ug-01	3657	34.584	3.271	3810700	0	NaN	336220	0.36	-	-1		0	87	747.303087670492	1492.59162240778	2	MULTI	HCD	FTMS	0	0	0	-1	0	0	0	0	2				NaN	1	NaN	NaN	NaN	NaN	1141	0	1	2514	3655
20140904-PurClathDigest-1ug-01	3658	34.587	8.93	6381000	0	NaN	792540	0.35	+	3702	SAKEEIAEYR	10	95	399.20352186943	1194.58873620849	3	MULTI	HCD	FTMS	0	0	0	-1	0	0	0	0	3	Unmodified	_SAKEEIAEYR_	F1MDZ2;O77788	145.416900634766	1	NaN	NaN	NaN	NaN	1142	0	1	2514	3655
20140904-PurClathDigest-1ug-01	3659	34.59	14.215	4003400	0	NaN	230140	0.36	+	3586	RPISADSAIMNPASK	15	147	787.402947251382	1572.79134156956	2	MULTI	HCD	FTMS	0	0	0	-1	0	0	0	0	4	Oxidation (M)	_RPISADSAIM(ox)NPASK_	P49951;F1MPU0	111.994201660156	1	NaN	NaN	NaN	NaN	1143	0	1	2514	3655
20140904-PurClathDigest-1ug-01	3660	34.593	30.883	171820	0	NaN	36881	0.38	+	2470	LDQLTANSAR	10	44	544.787608059546	1087.56066318589	2	MULTI	HCD	FTMS	0	0	0	-1	0	0	0	0	5	Unmodified	_LDQLTANSAR_	Q28115	115.598197937012	1	NaN	NaN	NaN	NaN	1144	0	1	2514	3655
20140904-PurClathDigest-1ug-01	3661	34.596	31.397	328790	0	NaN	35824	0.38	-	-1		0	57	438.732575313081	875.450597692961	2	MULTI	HCD	FTMS	0	0	0	-1	0	0	0	0	6				NaN	1	NaN	NaN	NaN	NaN	1145	0	1	2514	3655
20140904-PurClathDigest-1ug-01	3662	34.599	38.788	901520	0	NaN	94175	0.39	-	-1		0	103	617.297789198476	1232.58102546375	2	MULTI	HCD	FTMS	0	0	0	-1	0	0	0	0	7				NaN	1	NaN	NaN	NaN	NaN	1146	0	1	2514	3655
20140904-PurClathDigest-1ug-01	3664	34.611	19.705	1366100	0	NaN	222850	0.41	-	-1		0	88	522.76148147344	1043.50841001368	2	MULTI	HCD	FTMS	0	0	0	-1	0	0	0	0	1				NaN	1	NaN	NaN	NaN	NaN	1147	0	1	2515	3663
20140904-PurClathDigest-1ug-01	3665	34.615	15.236	5153100	0	NaN	194310	0.36	-	-1		0	195	579.965661602536	1736.87515540781	3	MULTI	HCD	FTMS	0	0	0	-1	0	0	0	0	2				NaN	1	NaN	NaN	NaN	NaN	1148	0	1	2515	3663
20140904-PurClathDigest-1ug-01	3666	34.618	17.8	144340	0	NaN	18014	0.37	-	-1		0	34	525.271299002351	1572.79206760725	3	MULTI	HCD	FTMS	0	0	0	-1	0	0	0	0	3				NaN	1	NaN	NaN	NaN	NaN	1149	0	1	2515	3663
20140904-PurClathDigest-1ug-01	3667	34.621	27.017	221070	0	NaN	22173	0.35	-	-1		0	49	916.372919166755	1830.73128540031	2	MULTI	HCD	FTMS	0	0	0	-1	0	0	0	0	4				NaN	1	NaN	NaN	NaN	NaN	1150	0	1	2515	3663
20140904-PurClathDigest-1ug-01	3668	34.624	31.116	50271	0	NaN	8474.1	0.38	-	-1		0	30	1283.08323859109	2564.15192424897	2	MULTI	HCD	FTMS	0	0	0	-1	0	0	0	0	5				NaN	1	NaN	NaN	NaN	NaN	1151	0	1	2515	3663
20140904-PurClathDigest-1ug-01	3669	34.627	21.43	981550	0	NaN	61102	0.37	-	-1		0	107	611.250850882623	1830.73072324807	3	MULTI	HCD	FTMS	0	0	0	-1	0	0	0	0	6				NaN	1	NaN	NaN	NaN	NaN	1152	0	1	2515	3663
20140904-PurClathDigest-1ug-01	3670	34.63	27.943	895010	0	NaN	80604	0.38	-	-1		0	108	672.336318989801	2013.9871275696	3	MULTI	HCD	FTMS	0	0	0	-1	0	0	0	0	7				NaN	1	NaN	NaN	NaN	NaN	1153	0	1	2515	3663
20140904-PurClathDigest-1ug-01	3672	34.642	5.77	13811000	0	NaN	2488200	0.38	+	3041	MPPPLPAR	8	77	447.747058910115	893.479564887029	2	MULTI	HCD	FTMS	0	0	0	-1	0	0	0	0	1	Oxidation (M)	_M(ox)PPPLPAR_	Q28115	93.0074615478516	1	NaN	NaN	NaN	NaN	1154	0	1	2516	3671
20140904-PurClathDigest-1ug-01	3673	34.645	11.094	6237000	0	NaN	504290	0.36	+	4269	TNEKEQLQGLNDR	13	121	772.886780152603	1543.75900737201	2	MULTI	HCD	FTMS	0	0	0	-1	0	0	0	0	2	Unmodified	_TNEKEQLQGLNDR_	Q08DH7	268.247711181641	1	NaN	NaN	NaN	NaN	1155	0	1	2516	3671
20140904-PurClathDigest-1ug-01	3674	34.648	28.384	1958000	0	NaN	358660	0.38	+	3985	SQLLGSAHEVQR	12	105	662.852013659284	1323.68947438537	2	MULTI	HCD	FTMS	0	0	0	-1	0	0	0	0	3	Unmodified	_SQLLGSAHEVQR_	E1BFB0	220.445693969727	1	NaN	NaN	NaN	NaN	1156	0	1	2516	3671
20140904-PurClathDigest-1ug-01	3675	34.651	24.145	598690	0	NaN	99363	0.37	+	4271	TNEKEQLQGLNDR	13	91	515.594404197457	1543.76138319257	3	MULTI	HCD	FTMS	0	0	0	-1	0	0	0	0	4	Unmodified	_TNEKEQLQGLNDR_	Q08DH7	147.485305786133	1	NaN	NaN	NaN	NaN	1157	0	1	2516	3671
20140904-PurClathDigest-1ug-01	3676	34.655	37.767	2707300	0	NaN	515850	0.38	-	-1		0	100	350.174819110284	698.335085287368	2	MULTI	HCD	FTMS	0	0	0	-1	0	0	0	0	5				NaN	1	NaN	NaN	NaN	NaN	1158	0	1	2516	3671
20140904-PurClathDigest-1ug-01	3677	34.658	45.858	252550	0	NaN	50525	0.38	-	-1		0	52	429.719182506695	857.423812080191	2	MULTI	HCD	FTMS	0	0	0	-1	0	0	0	0	6				NaN	1	NaN	NaN	NaN	NaN	1159	0	1	2516	3671
20140904-PurClathDigest-1ug-01	3678	34.661	48.391	674520	0	NaN	192250	0.39	-	-1		0	64	420.714379967867	839.414207002533	2	MULTI	HCD	FTMS	0	0	0	-1	0	0	0	0	7				NaN	1	NaN	NaN	NaN	NaN	1160	0	1	2516	3671
20140904-PurClathDigest-1ug-01	3680	34.673	15.585	2317100	0	NaN	194430	0.4	+	3889	SNEKEQLQGLNDR	13	116	765.878474981237	1529.74239702927	2	MULTI	HCD	FTMS	0	0	0	-1	0	0	0	0	1	Unmodified	_SNEKEQLQGLNDR_	F1MDZ2	207.188400268555	1	NaN	NaN	NaN	NaN	1161	0	1	2517	3679
20140904-PurClathDigest-1ug-01	3681	34.677	11.27	3390300	0	NaN	317880	0.36	-	-1		0	113	497.266824467516	1488.77864400275	3	MULTI	HCD	FTMS	0	0	0	-1	0	0	0	0	2				NaN	1	NaN	NaN	NaN	NaN	1162	0	1	2517	3679
20140904-PurClathDigest-1ug-01	3682	34.68	18.474	4761600	0	NaN	924420	0.37	-	-1		0	134	581.755473160211	1161.49639338722	2	MULTI	HCD	FTMS	0	0	0	-1	0	0	0	0	3				NaN	1	NaN	NaN	NaN	NaN	1163	0	1	2517	3679
20140904-PurClathDigest-1ug-01	3683	34.683	22.399	3517000	0	NaN	305500	0.37	-	-1		0	139	616.330172995781	NaN	0	PEAK	HCD	FTMS	0	0	0	-1	0	0	0	0	4				NaN	1	NaN	NaN	NaN	NaN	1164	0	1	2517	3679
20140904-PurClathDigest-1ug-01	3684	34.686	21.04	2785800	0	NaN	498300	0.37	-	-1		0	100	414.876486223301	NaN	0	PEAK	HCD	FTMS	0	0	0	-1	0	0	0	0	5				NaN	1	NaN	NaN	NaN	NaN	1165	0	1	2517	3679
20140904-PurClathDigest-1ug-01	3685	34.689	40.601	66205	0	NaN	17411	0.39	-	-1		0	34	655.856359845365	1309.69816675753	2	MULTI	HCD	FTMS	0	0	0	-1	0	0	0	0	6				NaN	1	NaN	NaN	NaN	NaN	1166	0	1	2517	3679
20140904-PurClathDigest-1ug-01	3686	34.693	26.359	2710500	0	NaN	200170	0.37	+	3986	SQLLGSAHEVQR	12	116	442.237256908761	1323.68994132648	3	MULTI	HCD	FTMS	0	0	0	-1	0	0	0	0	7	Unmodified	_SQLLGSAHEVQR_	E1BFB0	130.880401611328	1	NaN	NaN	NaN	NaN	1167	0	1	2517	3679
20140904-PurClathDigest-1ug-01	3688	34.704	0.363	228410000	0	NaN	48791000	0.38	+	2941	LTQEPESIR	9	92	536.784898277178	1071.55524362116	2	MULTI	HCD	FTMS	0	0	0	-1	0	0	0	0	1	Unmodified	_LTQEPESIR_	G3N252;P04975	152.421203613281	1	NaN	NaN	NaN	NaN	1168	0	1	2518	3687
20140904-PurClathDigest-1ug-01	3689	34.707	11.325	1805200	0	NaN	186930	0.36	-	-1		0	84	686.350052233102	1370.685551533	2	MULTI	HCD	FTMS	0	0	0	-1	0	0	0	0	2				NaN	1	NaN	NaN	NaN	NaN	1169	0	1	2518	3687
20140904-PurClathDigest-1ug-01	3690	34.71	11.719	17035000	0	NaN	1197100	0.36	+	2835	LQELDAASK	9	114	487.761284419253	973.508015905306	2	MULTI	HCD	FTMS	0	0	0	-1	0	0	0	0	3	Unmodified	_LQELDAASK_	G3N252;P04975	111.952003479004	1	NaN	NaN	NaN	NaN	1170	0	1	2518	3687
20140904-PurClathDigest-1ug-01	3691	34.713	16.753	1396200	0	NaN	178180	0.37	-	-1		0	106	613.301984581792	1836.88412434558	3	MULTI	HCD	FTMS	0	0	0	-1	0	0	0	0	4				NaN	1	NaN	NaN	NaN	NaN	1171	0	1	2518	3687
20140904-PurClathDigest-1ug-01	3692	34.716	22.257	667300	0	NaN	48106	0.37	-	-1		0	75	411.222517080426	1230.64572184148	3	MULTI	HCD	FTMS	0	0	0	-1	0	0	0	0	5				NaN	1	NaN	NaN	NaN	NaN	1172	0	1	2518	3687
20140904-PurClathDigest-1ug-01	3693	34.719	34.396	185450	0	NaN	32723	0.38	-	-1		0	42	552.252866764333	1102.49118059547	2	MULTI	HCD	FTMS	0	0	0	-1	0	0	0	0	6				NaN	1	NaN	NaN	NaN	NaN	1173	0	1	2518	3687
20140904-PurClathDigest-1ug-01	3694	34.723	52.644	707330	0	NaN	83542	0.4	-	-1		0	128	795.400432923688	1588.78631291418	2	MULTI	HCD	FTMS	0	0	0	-1	0	0	0	0	7				NaN	1	NaN	NaN	NaN	NaN	1174	0	1	2518	3687
20140904-PurClathDigest-1ug-01	3696	34.735	16.488	2288500	0	NaN	507320	0.4	-	-1		0	116	647.321332884923	1292.62811283665	2	MULTI	HCD	FTMS	0	0	0	-1	0	0	0	0	1				NaN	1	NaN	NaN	NaN	NaN	1175	0	1	2519	3695
20140904-PurClathDigest-1ug-01	3697	34.738	13.651	1576200	0	NaN	210900	0.36	-	-1		0	129	782.703270508217	2345.08798212485	3	MULTI	HCD	FTMS	0	0	0	-1	0	0	0	0	2				NaN	1	NaN	NaN	NaN	NaN	1176	0	1	2519	3695
20140904-PurClathDigest-1ug-01	3698	34.741	15.67	6468200	0	NaN	1171600	0.35	-	-1		0	63	309.178910535514	616.343268137827	2	MULTI	HCD	FTMS	0	0	0	-1	0	0	0	0	3				NaN	1	NaN	NaN	NaN	NaN	1177	0	1	2519	3695
20140904-PurClathDigest-1ug-01	3699	34.744	37.008	1514800	0	NaN	151450	0.38	+	3896	SNEKEQLQGLNDR	13	132	766.371749336457	1530.72894573971	2	MULTI	HCD	FTMS	0	0	0	-1	0	0	0	0	4	Deamidation (NQ)	_SNEKEQLQGLN(de)DR_	F1MDZ2	214.751098632813	1	NaN	NaN	NaN	NaN	1178	0	1	2519	3695
20140904-PurClathDigest-1ug-01	3700	34.748	21.786	2457300	0	NaN	138070	0.37	-	-1		0	164	651.332417066938	1950.97542180101	3	MULTI	HCD	FTMS	0	0	0	-1	0	0	0	0	5				NaN	1	NaN	NaN	NaN	NaN	1179	0	1	2519	3695
20140904-PurClathDigest-1ug-01	3701	34.751	20.027	2014600	0	NaN	163950	0.37	-	-1		0	149	533.932680647167	1598.7762125417	3	MULTI	HCD	FTMS	0	0	0	-1	0	0	0	0	6				NaN	1	NaN	NaN	NaN	NaN	1180	0	1	2519	3695
20140904-PurClathDigest-1ug-01	3702	34.754	51.557	275230	0	NaN	71405	0.4	-	-1		0	31	504.265076107308	1006.51559928142	2	MULTI	HCD	FTMS	0	0	0	-1	0	0	0	0	7				NaN	1	NaN	NaN	NaN	NaN	1181	0	1	2519	3695
20140904-PurClathDigest-1ug-01	3704	34.765	1.577	33289000	0	NaN	5090400	0.39	+	891	ENPYYDSR	8	73	522.225395314758	1042.43623769632	2	MULTI	HCD	FTMS	0	0	0	-1	0	0	0	0	1	Unmodified	_ENPYYDSR_	P49951;F1MPU0	128.33479309082	1	NaN	NaN	NaN	NaN	1182	0	1	2520	3703
20140904-PurClathDigest-1ug-01	3705	34.769	20.24	52056	0	NaN	5115.6	0.37	-	-1		0	20	1308.6228858405	2615.23121874779	2	MULTI	HCD	FTMS	0	0	0	-1	0	0	0	0	2				NaN	1	NaN	NaN	NaN	NaN	1183	0	1	2520	3703
20140904-PurClathDigest-1ug-01	3706	34.772	26.637	35322	0	NaN	3613.9	0.38	-	-1		0	19	1274.1598838898	2546.3052148464	2	MULTI	HCD	FTMS	0	0	0	-1	0	0	0	0	3				NaN	1	NaN	NaN	NaN	NaN	1184	0	1	2520	3703
20140904-PurClathDigest-1ug-01	3707	34.775	36.023	840810	0	NaN	209620	0.38	+	4088	SVLQAVQK	8	65	436.763704405333	871.512855877466	2	MULTI	HCD	FTMS	0	0	0	-1	0	0	0	0	4	Unmodified	_SVLQAVQK_	E1BP30;Q1LZ76	86.927978515625	1	NaN	NaN	NaN	NaN	1185	0	1	2520	3703
20140904-PurClathDigest-1ug-01	3708	34.779	41.142	746050	0	NaN	221610	0.39	+	1609	IKGEELSEANVR	12	94	672.859471223691	1343.70438951418	2	MULTI	HCD	FTMS	0	0	0	-1	0	0	0	0	5	Unmodified	_IKGEELSEANVR_	F1MIC9	107.662200927734	1	NaN	NaN	NaN	NaN	1186	0	1	2520	3703
20140904-PurClathDigest-1ug-01	3709	34.782	41.69	177490	0	NaN	15292	0.39	-	-1		0	58	479.248533285992	956.482513638785	2	MULTI	HCD	FTMS	0	0	0	-1	0	0	0	0	6				NaN	1	NaN	NaN	NaN	NaN	1187	0	1	2520	3703
20140904-PurClathDigest-1ug-01	3710	34.785	50.617	717450	0	NaN	265150	0.4	-	-1		0	89	676.339431539185	1350.66431014517	2	MULTI	HCD	FTMS	0	0	0	-1	0	0	0	0	7				NaN	1	NaN	NaN	NaN	NaN	1188	0	1	2520	3703
20140904-PurClathDigest-1ug-01	3712	34.797	13.053	3962800	0	NaN	577120	0.39	+	4729	VMEYINR	7	87	470.731193761123	939.447834589046	2	MULTI	HCD	FTMS	0	0	0	-1	0	0	0	0	1	Oxidation (M)	_VM(ox)EYINR_	P49951;F1MPU0	99.9583969116211	1	NaN	NaN	NaN	NaN	1189	0	1	2521	3711
20140904-PurClathDigest-1ug-01	3713	34.801	13.007	90537	0	NaN	9131.4	0.36	-	-1		0	26	1220.22990194531	3657.66787643612	3	MULTI	HCD	FTMS	0	0	0	-1	0	0	0	0	2				NaN	1	NaN	NaN	NaN	NaN	1190	0	1	2521	3711
20140904-PurClathDigest-1ug-01	3714	34.804	51.38	400110	0	NaN	42161	0.4	-	-1		0	60	422.214221213843	842.413889494487	2	MULTI	HCD	FTMS	0	0	0	-1	0	0	0	0	3				NaN	1	NaN	NaN	NaN	NaN	1191	0	1	2521	3711
20140904-PurClathDigest-1ug-01	3715	34.807	65.269	24983	0	NaN	4709.5	0.41	-	-1		0	27	1008.9797466494	2015.94494036559	2	MULTI	HCD	FTMS	0	0	0	-1	0	0	0	0	4				NaN	1	NaN	NaN	NaN	NaN	1192	0	1	2521	3711
20140904-PurClathDigest-1ug-01	3716	34.811	89.682	318640	0	NaN	223380	0.44	-	-1		0	57	1058.00237647989	NaN	0	PEAK	HCD	FTMS	0	0	0	-1	0	0	0	0	5				NaN	1	NaN	NaN	NaN	NaN	1193	0	1	2521	3711
20140904-PurClathDigest-1ug-01	3717	34.816	37.55	34632	0	NaN	1814	0.39	-	-1		0	28	1390.92316711632	4169.74767194915	3	MULTI	HCD	FTMS	0	0	0	-1	0	0	0	0	6				NaN	1	NaN	NaN	NaN	NaN	1194	0	1	2521	3711
20140904-PurClathDigest-1ug-01	3718	34.819	172.72	18438	0	NaN	7289	0.52	-	-1		0	31	1197.59329017375	1196.58601370715	1	MULTI	HCD	FTMS	0	0	0	-1	0	0	0	0	7				NaN	1	NaN	NaN	NaN	NaN	1195	0	1	2521	3711
20140904-PurClathDigest-1ug-01	3720	34.833	0.469	94765000	0	NaN	6241500	0.39	+	3587	RPISADSAIMNPASK	15	129	787.402947251382	1572.79134156956	2	MULTI	HCD	FTMS	0	0	0	-1	0	0	0	0	1	Oxidation (M)	_RPISADSAIM(ox)NPASK_	P49951;F1MPU0	91.8553771972656	1	NaN	NaN	NaN	NaN	1196	0	1	2522	3719
20140904-PurClathDigest-1ug-01	3721	34.836	11.596	3469200	0	NaN	352210	0.35	-	-1		0	85	533.263726667907	1064.51290040261	2	MULTI	HCD	FTMS	0	0	0	-1	0	0	0	0	2				NaN	1	NaN	NaN	NaN	NaN	1197	0	1	2522	3719
20140904-PurClathDigest-1ug-01	3722	34.839	21.54	2786100	0	NaN	519670	0.37	+	2857	LQSEPESIR	9	128	529.777481908886	1057.54041088457	2	MULTI	HCD	FTMS	0	0	0	-1	0	0	0	0	3	Unmodified	_LQSEPESIR_	P04973	135.03840637207	1	NaN	NaN	NaN	NaN	1198	0	1	2522	3719
20140904-PurClathDigest-1ug-01	3723	34.842	16.191	75818	0	NaN	6081.4	0.37	-	-1		0	22	1367.9448529218	4100.81272936561	3	MULTI	HCD	FTMS	0	0	0	-1	0	0	0	0	4				NaN	1	NaN	NaN	NaN	NaN	1199	0	1	2522	3719
20140904-PurClathDigest-1ug-01	3724	34.845	29.788	1328800	0	NaN	391310	0.38	-	-1		0	54	398.239872613545	397.232596146945	1	MULTI	HCD	FTMS	0	0	0	-1	0	0	0	0	5				NaN	1	NaN	NaN	NaN	NaN	1200	0	1	2522	3719
20140904-PurClathDigest-1ug-01	3725	34.849	70.409	394730	0	NaN	93627	0.42	-	-1		0	99	598.301179534467	1194.58780613573	2	MULTI	HCD	FTMS	0	0	0	-1	0	0	0	0	6				NaN	1	NaN	NaN	NaN	NaN	1201	0	1	2522	3719
20140904-PurClathDigest-1ug-01	3726	34.853	48.511	246070	0	NaN	21926	0.4	-	-1		0	86	674.666989513705	2020.97913914132	3	MULTI	HCD	FTMS	0	0	0	-1	0	0	0	0	7				NaN	1	NaN	NaN	NaN	NaN	1202	0	1	2522	3719
20140904-PurClathDigest-1ug-01	3728	34.864	0.535	26429000	0	NaN	2624800	0.39	+	3594	RPISADSAIMNPASK	15	71	525.271299002351	1572.79206760725	3	MULTI	HCD	FTMS	0	0	0	-1	0	0	0	0	1	Oxidation (M)	_RPISADSAIM(ox)NPASK_	P49951;F1MPU0	77.2701034545898	1	NaN	NaN	NaN	NaN	1203	0	1	2523	3727
20140904-PurClathDigest-1ug-01	3729	34.868	14.85	794790	0	NaN	96593	0.36	-	-1		0	60	490.756076707593	979.497600481987	2	MULTI	HCD	FTMS	0	0	0	-1	0	0	0	0	2				NaN	1	NaN	NaN	NaN	NaN	1204	0	1	2523	3727
20140904-PurClathDigest-1ug-01	3730	34.871	32.081	626380	0	NaN	40671	0.38	-	-1		0	103	594.60850272583	1780.80367877769	3	MULTI	HCD	FTMS	0	0	0	-1	0	0	0	0	3				NaN	1	NaN	NaN	NaN	NaN	1205	0	1	2523	3727
20140904-PurClathDigest-1ug-01	3731	34.874	25.132	58330	0	NaN	8962.9	0.38	-	-1		0	29	1304.80631283162	1303.79903636502	1	MULTI	HCD	FTMS	0	0	0	-1	0	0	0	0	4				NaN	1	NaN	NaN	NaN	NaN	1206	0	1	2523	3727
20140904-PurClathDigest-1ug-01	3732	34.877	35.185	336790	0	NaN	95825	0.38	-	-1		0	47	503.939608896732	1508.7969972904	3	MULTI	HCD	FTMS	0	0	0	-1	0	0	0	0	5				NaN	1	NaN	NaN	NaN	NaN	1207	0	1	2523	3727
20140904-PurClathDigest-1ug-01	3733	34.88	62.673	31953	0	NaN	5838.2	0.41	-	-1		0	29	1197.92163035714	NaN	0	PEAK	HCD	FTMS	0	0	0	-1	0	0	0	0	6				NaN	1	NaN	NaN	NaN	NaN	1208	0	1	2523	3727
20140904-PurClathDigest-1ug-01	3734	34.884	36.184	33992	0	NaN	5862.6	0.4	-	-1		0	23	1397.01554617784	4188.02480913372	3	MULTI	HCD	FTMS	0	0	0	-1	0	0	0	0	7				NaN	1	NaN	NaN	NaN	NaN	1209	0	1	2523	3727
20140904-PurClathDigest-1ug-01	3736	34.896	20.782	1815200	0	NaN	281620	0.41	-	-1		0	100	595.795067088349	1189.5755812435	2	MULTI	HCD	FTMS	0	0	0	-1	0	0	0	0	1				NaN	1	NaN	NaN	NaN	NaN	1210	0	1	2524	3735
20140904-PurClathDigest-1ug-01	3737	34.9	19.579	85977	0	NaN	10200	0.37	-	-1		0	28	1049.53568223634	3145.58521730923	3	MULTI	HCD	FTMS	0	0	0	-1	0	0	0	0	2				NaN	1	NaN	NaN	NaN	NaN	1211	0	1	2524	3735
20140904-PurClathDigest-1ug-01	3738	34.903	21.01	51204	0	NaN	22547	0.37	-	-1		0	14	1367.9448529218	4100.81272936561	3	MULTI	HCD	FTMS	0	0	0	-1	0	0	0	0	3				NaN	1	NaN	NaN	NaN	NaN	1212	0	1	2524	3735
20140904-PurClathDigest-1ug-01	3739	34.906	38.4	270400	0	NaN	22663	0.38	-	-1		0	71	714.351858070533	1426.68916320787	2	MULTI	HCD	FTMS	0	0	0	-1	0	0	0	0	4				NaN	1	NaN	NaN	NaN	NaN	1213	0	1	2524	3735
20140904-PurClathDigest-1ug-01	3740	34.909	37.226	903600	0	NaN	65707	0.38	+	1909	KDIEESSLVK	10	122	574.313413429338	1146.61227392548	2	MULTI	HCD	FTMS	0	0	0	-1	0	0	0	0	5	Unmodified	_KDIEESSLVK_	F1MDZ2;O77788	157.836502075195	1	NaN	NaN	NaN	NaN	1214	0	1	2524	3735
20140904-PurClathDigest-1ug-01	3741	34.913	56.117	1034100	0	NaN	150780	0.4	-	-1		0	135	568.253156671977	1134.49176041075	2	MULTI	HCD	FTMS	0	0	0	-1	0	0	0	0	6				NaN	1	NaN	NaN	NaN	NaN	1215	0	1	2524	3735
20140904-PurClathDigest-1ug-01	3742	34.916	59.886	638290	0	NaN	101420	0.41	+	3200	NMQDMVEDYR	10	114	666.763515168348	1331.5124774035	2	MULTI	HCD	FTMS	0	0	0	-1	0	0	0	0	7	2 Oxidation (M)	_NM(ox)QDM(ox)VEDYR_	CON__P04264	82.8986892700195	1	NaN	NaN	NaN	NaN	1216	0	1	2524	3735
20140904-PurClathDigest-1ug-01	3744	34.928	28.459	121360	0	NaN	17192	0.42	-	-1		0	33	670.835022077074	1339.65549122095	2	MULTI	HCD	FTMS	0	0	0	-1	0	0	0	0	1				NaN	1	NaN	NaN	NaN	NaN	1217	0	1	2525	3743
20140904-PurClathDigest-1ug-01	3745	34.932	20.862	1308000	0	NaN	72317	0.37	+	2721	LIQSHPESAEDLQEK	15	139	575.288133675766	1722.8425716275	3	MULTI	HCD	FTMS	0	0	0	-1	0	0	0	0	2	Unmodified	_LIQSHPESAEDLQEK_	E1BFB0	116.680198669434	1	NaN	NaN	NaN	NaN	1218	0	1	2525	3743
20140904-PurClathDigest-1ug-01	3746	34.935	23.597	806860	0	NaN	150520	0.37	-	-1		0	87	613.006164909578	2447.99555377191	4	MULTI	HCD	FTMS	0	0	0	-1	0	0	0	0	3				NaN	1	NaN	NaN	NaN	NaN	1219	0	1	2525	3743
20140904-PurClathDigest-1ug-01	3747	34.938	30.198	64846	0	NaN	13438	0.38	-	-1		0	26	1176.03277889366	4700.10200970822	4	MULTI	HCD	FTMS	0	0	0	-1	0	0	0	0	4				NaN	1	NaN	NaN	NaN	NaN	1220	0	1	2525	3743
20140904-PurClathDigest-1ug-01	3748	34.942	46.177	872860	0	NaN	76131	0.39	+	1972	KFDDFQK	7	89	464.231181319098	926.447809704996	2	MULTI	HCD	FTMS	0	0	0	-1	0	0	0	0	5	Unmodified	_KFDDFQK_	E1BFB0	130.766204833984	1	NaN	NaN	NaN	NaN	1221	0	1	2525	3743
20140904-PurClathDigest-1ug-01	3749	34.945	51.348	745390	0	NaN	82348	0.4	+	4270	TNEKEQLQGLNDR	13	127	772.886780152603	1543.75900737201	2	MULTI	HCD	FTMS	0	0	0	-1	0	0	0	0	6	Unmodified	_TNEKEQLQGLNDR_	Q08DH7	186.623092651367	1	NaN	NaN	NaN	NaN	1222	0	1	2525	3743
20140904-PurClathDigest-1ug-01	3750	34.949	81.313	149360	0	NaN	39748	0.43	-	-1		0	70	781.410732019098	780.403455552498	1	MULTI	HCD	FTMS	0	0	0	-1	0	0	0	0	7				NaN	1	NaN	NaN	NaN	NaN	1223	0	1	2525	3743
20140904-PurClathDigest-1ug-01	3752	34.961	1.625	27258000	0	NaN	2428100	0.38	+	2836	LQELDAASK	9	82	487.761284419253	973.508015905306	2	MULTI	HCD	FTMS	0	0	0	-1	0	0	0	0	1	Unmodified	_LQELDAASK_	G3N252;P04975	130.477294921875	1	NaN	NaN	NaN	NaN	1224	0	1	2526	3751
20140904-PurClathDigest-1ug-01	3753	34.965	13.141	205490	0	NaN	44525	0.36	-	-1		0	31	536.784898277178	1071.55524362116	2	MULTI	HCD	FTMS	0	0	0	-1	0	0	0	0	2				NaN	1	NaN	NaN	NaN	NaN	1225	0	1	2526	3751
20140904-PurClathDigest-1ug-01	3754	34.968	8.743	129030	0	NaN	21800	0.36	-	-1		0	21	1397.01554617784	4188.02480913372	3	MULTI	HCD	FTMS	0	0	0	-1	0	0	0	0	3				NaN	1	NaN	NaN	NaN	NaN	1226	0	1	2526	3751
20140904-PurClathDigest-1ug-01	3755	34.97	50.925	368660	0	NaN	37387	0.4	-	-1		0	107	861.430637814384	860.423361347784	1	MULTI	HCD	FTMS	0	0	0	-1	0	0	0	0	4				NaN	1	NaN	NaN	NaN	NaN	1227	0	1	2526	3751
20140904-PurClathDigest-1ug-01	3756	34.974	33.709	51519	0	NaN	3859.4	0.38	-	-1		0	34	793.557691358852	792.550414892252	1	MULTI	HCD	FTMS	0	0	0	-1	0	0	0	0	5				NaN	1	NaN	NaN	NaN	NaN	1228	0	1	2526	3751
20140904-PurClathDigest-1ug-01	3757	34.977	33.434	74095	0	NaN	19147	0.38	-	-1		0	26	782.307847306903	1562.60114168061	2	MULTI	HCD	FTMS	0	0	0	-1	0	0	0	0	6				NaN	1	NaN	NaN	NaN	NaN	1229	0	1	2526	3751
20140904-PurClathDigest-1ug-01	3758	34.981	53.263	93560	0	NaN	17551	0.4	-	-1		0	45	586.789741850287	1171.56493076737	2	MULTI	HCD	FTMS	0	0	0	-1	0	0	0	0	7				NaN	1	NaN	NaN	NaN	NaN	1230	0	1	2526	3751
20140904-PurClathDigest-1ug-01	3760	34.993	19.768	2872800	0	NaN	364140	0.4	+	4743	VMTEPTALSEK	11	129	611.30489046353	1220.59522799386	2	MULTI	HCD	FTMS	0	0	0	-1	0	0	0	0	1	Oxidation (M)	_VM(ox)TEPTALSEK_	F1MEW3	98.4945907592773	1	NaN	NaN	NaN	NaN	1231	0	1	2527	3759
20140904-PurClathDigest-1ug-01	3761	34.996	31.48	47868	0	NaN	4137.3	0.38	-	-1		0	25	519.268722591099	1554.7843383735	3	MULTI	HCD	FTMS	0	0	0	-1	0	0	0	0	2				NaN	1	NaN	NaN	NaN	NaN	1232	0	1	2527	3759
20140904-PurClathDigest-1ug-01	3762	35	43.691	1159400	0	NaN	73123	0.39	-	-1		0	146	779.893053697394	1557.77155446159	2	MULTI	HCD	FTMS	0	0	0	-1	0	0	0	0	3				NaN	1	NaN	NaN	NaN	NaN	1233	0	1	2527	3759
20140904-PurClathDigest-1ug-01	3763	35.003	48.625	1684600	0	NaN	370690	0.4	-	-1		0	111	561.246222210369	1120.47789148754	2	MULTI	HCD	FTMS	0	0	0	-1	0	0	0	0	4				NaN	1	NaN	NaN	NaN	NaN	1234	0	1	2527	3759
20140904-PurClathDigest-1ug-01	3764	35.007	78.135	24364	0	NaN	1841.9	0.43	-	-1		0	34	1180.60279043179	4718.38205586076	4	MULTI	HCD	FTMS	0	0	0	-1	0	0	0	0	5				NaN	1	NaN	NaN	NaN	NaN	1235	0	1	2527	3759
20140904-PurClathDigest-1ug-01	3765	35.011	61.153	25508	0	NaN	1976.2	0.41	-	-1		0	33	817.004356239884	2447.99123931985	3	MULTI	HCD	FTMS	0	0	0	-1	0	0	0	0	6				NaN	1	NaN	NaN	NaN	NaN	1236	0	1	2527	3759
20140904-PurClathDigest-1ug-01	3766	35.014	122.32	1103000	0	NaN	81914	0.47	+	734	EAEGLPDRTEAREESEPEVK	20	193	757.696289880191	2270.06704024077	3	MULTI	HCD	FTMS	0	0	0	-1	0	0	0	0	7	Unmodified	_EAEGLPDRTEAREESEPEVK_	F1N3M8;G3MYP5	146.719802856445	1	NaN	NaN	NaN	NaN	1237	0	1	2527	3759
20140904-PurClathDigest-1ug-01	3768	35.027	1.837	21700000	0	NaN	3438200	0.39	+	892	ENPYYDSR	8	75	522.225395314758	1042.43623769632	2	MULTI	HCD	FTMS	0	0	0	-1	0	0	0	0	1	Unmodified	_ENPYYDSR_	P49951;F1MPU0	144.603393554688	1	NaN	NaN	NaN	NaN	1238	0	1	2528	3767
20140904-PurClathDigest-1ug-01	3769	35.031	18.059	1794300	0	NaN	404980	0.36	+	1357	GTLDPVEK	8	63	429.732042402018	857.449531870836	2	MULTI	HCD	FTMS	0	0	0	-1	0	0	0	0	2	Unmodified	_GTLDPVEK_	P19120	79.8948974609375	1	NaN	NaN	NaN	NaN	1239	0	1	2528	3767
20140904-PurClathDigest-1ug-01	3770	35.034	26.061	403890	0	NaN	164850	0.37	+	90	AGDSHASEEPEQTEPEQREPTPYPDER	27	57	771.089075792026	3080.3271973017	4	MULTI	HCD	FTMS	0	0	0	-1	0	0	0	0	3	Unmodified	_AGDSHASEEPEQTEPEQREPTPYPDER_	G3MYP5	62.1915702819824	1	NaN	NaN	NaN	NaN	1240	0	1	2528	3767
20140904-PurClathDigest-1ug-01	3771	35.037	27.377	671990	0	NaN	49476	0.38	+	91	AGDSHASEEPEQTEPEQREPTPYPDER	27	86	1027.7816762175	3080.32319925271	3	MULTI	HCD	FTMS	0	0	0	-1	0	0	0	0	4	Unmodified	_AGDSHASEEPEQTEPEQREPTPYPDER_	G3MYP5	106.750602722168	1	NaN	NaN	NaN	NaN	1241	0	1	2528	3767
20140904-PurClathDigest-1ug-01	3772	35.04	36.429	1076300	0	NaN	97306	0.39	+	735	EAEGLPDRTEAREESEPEVK	20	121	757.696289880191	2270.06704024077	3	MULTI	HCD	FTMS	0	0	0	-1	0	0	0	0	5	Unmodified	_EAEGLPDRTEAREESEPEVK_	F1N3M8;G3MYP5	63.4127311706543	1	NaN	NaN	NaN	NaN	1242	0	1	2528	3767
20140904-PurClathDigest-1ug-01	3773	35.044	45.712	1012600	0	NaN	312320	0.38	-	-1		0	45	319.186987625868	636.359422318535	2	MULTI	HCD	FTMS	0	0	0	-1	0	0	0	0	6				NaN	1	NaN	NaN	NaN	NaN	1243	0	1	2528	3767
20140904-PurClathDigest-1ug-01	3774	35.047	38.255	34118	0	NaN	4138	0.38	-	-1		0	21	1180.60279043179	4718.38205586076	4	MULTI	HCD	FTMS	0	0	0	-1	0	0	0	0	7				NaN	1	NaN	NaN	NaN	NaN	1244	0	1	2528	3767
20140904-PurClathDigest-1ug-01	3776	35.059	17.305	2663800	0	NaN	395920	0.4	+	4730	VMEYINR	7	74	470.731193761123	939.447834589046	2	MULTI	HCD	FTMS	0	0	0	-1	0	0	0	0	1	Oxidation (M)	_VM(ox)EYINR_	P49951;F1MPU0	112.136703491211	1	NaN	NaN	NaN	NaN	1245	0	1	2529	3775
20140904-PurClathDigest-1ug-01	3777	35.062	18.822	2496000	0	NaN	882470	0.37	-	-1		0	80	676.339431539185	1350.66431014517	2	MULTI	HCD	FTMS	0	0	0	-1	0	0	0	0	2				NaN	1	NaN	NaN	NaN	NaN	1246	0	1	2529	3775
20140904-PurClathDigest-1ug-01	3778	35.065	16.353	819840	0	NaN	79928	0.36	-	-1		0	67	327.862313568002	980.565111304205	3	MULTI	HCD	FTMS	0	0	0	-1	0	0	0	0	3				NaN	1	NaN	NaN	NaN	NaN	1247	0	1	2529	3775
20140904-PurClathDigest-1ug-01	3779	35.068	22.177	340840	0	NaN	70327	0.37	-	-1		0	50	528.244395617006	1054.47423830081	2	MULTI	HCD	FTMS	0	0	0	-1	0	0	0	0	4				NaN	1	NaN	NaN	NaN	NaN	1248	0	1	2529	3775
20140904-PurClathDigest-1ug-01	3780	35.072	23.956	801350	0	NaN	169090	0.37	-	-1		0	101	568.523783704311	2270.06602895084	4	MULTI	HCD	FTMS	0	0	0	-1	0	0	0	0	5				NaN	1	NaN	NaN	NaN	NaN	1249	0	1	2529	3775
20140904-PurClathDigest-1ug-01	3781	35.075	34.038	39872	0	NaN	2332.4	0.39	-	-1		0	31	1220.22990194531	3657.66787643612	3	MULTI	HCD	FTMS	0	0	0	-1	0	0	0	0	6				NaN	1	NaN	NaN	NaN	NaN	1250	0	1	2529	3775
20140904-PurClathDigest-1ug-01	3782	35.078	40.205	767640	0	NaN	116960	0.39	-	-1		0	68	447.747058910115	893.479564887029	2	MULTI	HCD	FTMS	0	0	0	-1	0	0	0	0	7				NaN	1	NaN	NaN	NaN	NaN	1251	0	1	2529	3775
20140904-PurClathDigest-1ug-01	3784	35.09	0.245	277460000	0	NaN	17550000	0.39	+	3588	RPISADSAIMNPASK	15	151	787.402947251382	1572.79134156956	2	MULTI	HCD	FTMS	0	0	0	-1	0	0	0	0	1	Oxidation (M)	_RPISADSAIM(ox)NPASK_	P49951;F1MPU0	129.788497924805	1	NaN	NaN	NaN	NaN	1252	0	1	2530	3783
20140904-PurClathDigest-1ug-01	3785	35.093	6.537	9847800	0	NaN	1412200	0.35	+	1641	IPSVSTHIK	9	100	491.290168894211	980.565784855222	2	MULTI	HCD	FTMS	0	0	0	-1	0	0	0	0	2	Unmodified	_IPSVSTHIK_	F1MSQ6	97.4318389892578	1	NaN	NaN	NaN	NaN	1253	0	1	2530	3783
20140904-PurClathDigest-1ug-01	3786	35.096	33.376	1024400	0	NaN	154020	0.37	-	-1		0	70	386.713537201488	771.412521469776	2	MULTI	HCD	FTMS	0	0	0	-1	0	0	0	0	3				NaN	1	NaN	NaN	NaN	NaN	1254	0	1	2530	3783
20140904-PurClathDigest-1ug-01	3787	35.099	33.945	2221000	0	NaN	355180	0.38	-	-1		0	96	320.656132552253	639.297712171306	2	MULTI	HCD	FTMS	0	0	0	-1	0	0	0	0	4				NaN	1	NaN	NaN	NaN	NaN	1255	0	1	2530	3783
20140904-PurClathDigest-1ug-01	3788	35.103	28.871	864970	0	NaN	68839	0.37	-	-1		0	131	711.59206209188	2842.33914250112	4	MULTI	HCD	FTMS	0	0	0	-1	0	0	0	0	5				NaN	1	NaN	NaN	NaN	NaN	1256	0	1	2530	3783
20140904-PurClathDigest-1ug-01	3789	35.106	34.871	2210400	0	NaN	198640	0.38	-	-1		0	115	393.194986865693	1176.56313119728	3	MULTI	HCD	FTMS	0	0	0	-1	0	0	0	0	6				NaN	1	NaN	NaN	NaN	NaN	1257	0	1	2530	3783
20140904-PurClathDigest-1ug-01	3790	35.109	28.538	769430	0	NaN	209920	0.37	-	-1		0	104	458.222337361387	1828.86024357915	4	MULTI	HCD	FTMS	0	0	0	-1	0	0	0	0	7				NaN	1	NaN	NaN	NaN	NaN	1258	0	1	2530	3783
20140904-PurClathDigest-1ug-01	3792	35.121	0.353	39328000	0	NaN	3018600	0.36	+	3595	RPISADSAIMNPASK	15	67	525.271299002351	1572.79206760725	3	MULTI	HCD	FTMS	0	0	0	-1	0	0	0	0	1	Oxidation (M)	_RPISADSAIM(ox)NPASK_	P49951;F1MPU0	80.5854797363281	1	NaN	NaN	NaN	NaN	1259	0	1	2531	3791
20140904-PurClathDigest-1ug-01	3793	35.124	13.757	2236100	0	NaN	362620	0.36	-	-1		0	119	707.982532393487	2120.92576778066	3	MULTI	HCD	FTMS	0	0	0	-1	0	0	0	0	2				NaN	1	NaN	NaN	NaN	NaN	1260	0	1	2531	3791
20140904-PurClathDigest-1ug-01	3794	35.127	22.132	356300	0	NaN	21056	0.37	-	-1		0	70	503.939608896732	1508.7969972904	3	MULTI	HCD	FTMS	0	0	0	-1	0	0	0	0	3				NaN	1	NaN	NaN	NaN	NaN	1261	0	1	2531	3791
20140904-PurClathDigest-1ug-01	3795	35.13	24.686	3050600	0	NaN	418820	0.37	-	-1		0	166	531.237995469662	2120.92287601225	4	MULTI	HCD	FTMS	0	0	0	-1	0	0	0	0	4				NaN	1	NaN	NaN	NaN	NaN	1262	0	1	2531	3791
20140904-PurClathDigest-1ug-01	3796	35.133	49.347	702360	0	NaN	112610	0.4	-	-1		0	112	1061.47019786323	2120.92584279327	2	MULTI	HCD	FTMS	0	0	0	-1	0	0	0	0	5				NaN	1	NaN	NaN	NaN	NaN	1263	0	1	2531	3791
20140904-PurClathDigest-1ug-01	3797	35.137	33.882	250120	0	NaN	24303	0.38	-	-1		0	66	540.012872506839	2156.02238416096	4	MULTI	HCD	FTMS	0	0	0	-1	0	0	0	0	6				NaN	1	NaN	NaN	NaN	NaN	1264	0	1	2531	3791
20140904-PurClathDigest-1ug-01	3798	35.14	42.139	1755500	0	NaN	106830	0.39	-	-1		0	132	406.579876579902	1216.71780033991	3	MULTI	HCD	FTMS	0	0	0	-1	0	0	0	0	7				NaN	1	NaN	NaN	NaN	NaN	1265	0	1	2531	3791
20140904-PurClathDigest-1ug-01	3800	35.152	4.909	336800	0	NaN	19390	0.39	-	-1		0	33	1049.53568223634	3145.58521730923	3	MULTI	HCD	FTMS	0	0	0	-1	0	0	0	0	1				NaN	1	NaN	NaN	NaN	NaN	1266	0	1	2532	3799
20140904-PurClathDigest-1ug-01	3801	35.155	28.925	4701200	0	NaN	834670	0.37	-	-1		0	99	478.729217134393	955.443881335585	2	MULTI	HCD	FTMS	0	0	0	-1	0	0	0	0	2				NaN	1	NaN	NaN	NaN	NaN	1267	0	1	2532	3799
20140904-PurClathDigest-1ug-01	3802	35.158	30.395	1151100	0	NaN	179230	0.38	+	1159	FSVEDNR	7	73	433.70400223513	865.393451537059	2	MULTI	HCD	FTMS	0	0	0	-1	0	0	0	0	3	Unmodified	_FSVEDNR_	E1BKN2	136.232696533203	1	NaN	NaN	NaN	NaN	1268	0	1	2532	3799
20140904-PurClathDigest-1ug-01	3803	35.162	38.485	880420	0	NaN	60845	0.39	-	-1		0	107	714.351858070533	1426.68916320787	2	MULTI	HCD	FTMS	0	0	0	-1	0	0	0	0	4				NaN	1	NaN	NaN	NaN	NaN	1269	0	1	2532	3799
20140904-PurClathDigest-1ug-01	3804	35.165	26.864	1483400	0	NaN	98962	0.38	-	-1		0	129	719.682260617964	2156.02495245409	3	MULTI	HCD	FTMS	0	0	0	-1	0	0	0	0	5				NaN	1	NaN	NaN	NaN	NaN	1270	0	1	2532	3799
20140904-PurClathDigest-1ug-01	3805	35.168	28.962	809590	0	NaN	74162	0.38	+	2718	LIQNNHYAMEDVATR	15	114	597.620925040518	1789.84094572175	3	MULTI	HCD	FTMS	0	0	0	-1	0	0	0	0	6	Oxidation (M)	_LIQNNHYAM(ox)EDVATR_	E1BFB0	70.3051071166992	1	NaN	NaN	NaN	NaN	1271	0	1	2532	3799
20140904-PurClathDigest-1ug-01	3806	35.171	53.414	1089800	0	NaN	134460	0.4	-	-1		0	128	617.295811841742	1232.57707075028	2	MULTI	HCD	FTMS	0	0	0	-1	0	0	0	0	7				NaN	1	NaN	NaN	NaN	NaN	1272	0	1	2532	3799
20140904-PurClathDigest-1ug-01	3808	35.183	4.405	5331300	0	NaN	731750	0.39	-	-1		0	94	588.02930013109	2348.08809465796	4	MULTI	HCD	FTMS	0	0	0	-1	0	0	0	0	1				NaN	1	NaN	NaN	NaN	NaN	1273	0	1	2533	3807
20140904-PurClathDigest-1ug-01	3809	35.187	18.677	1409800	0	NaN	373070	0.37	-	-1		0	99	694.293420070366	1386.57228720753	2	MULTI	HCD	FTMS	0	0	0	-1	0	0	0	0	2				NaN	1	NaN	NaN	NaN	NaN	1274	0	1	2533	3807
20140904-PurClathDigest-1ug-01	3810	35.19	17.324	1555500	0	NaN	254290	0.36	-	-1		0	85	595.795067088349	1189.5755812435	2	MULTI	HCD	FTMS	0	0	0	-1	0	0	0	0	3				NaN	1	NaN	NaN	NaN	NaN	1275	0	1	2533	3807
20140904-PurClathDigest-1ug-01	3811	35.193	19.066	125110	0	NaN	54833	0.37	-	-1		0	28	670.835022077074	1339.65549122095	2	MULTI	HCD	FTMS	0	0	0	-1	0	0	0	0	4				NaN	1	NaN	NaN	NaN	NaN	1276	0	1	2533	3807
20140904-PurClathDigest-1ug-01	3812	35.196	13.892	3272400	0	NaN	241570	0.36	+	3498	RFDDAVVQSDMK	12	115	713.834491701105	1425.65443046901	2	MULTI	HCD	FTMS	0	0	0	-1	0	0	0	0	5	Oxidation (M)	_RFDDAVVQSDM(ox)K_	P19120	112.577598571777	1	NaN	NaN	NaN	NaN	1277	0	1	2533	3807
20140904-PurClathDigest-1ug-01	3813	35.199	21.08	3654000	0	NaN	160600	0.37	+	3047	MQHNLEQQIQAR	12	165	756.374141770573	1510.73373060795	2	MULTI	HCD	FTMS	0	0	0	-1	0	0	0	0	6	Oxidation (M)	_M(ox)QHNLEQQIQAR_	E1BFB0	92.4978866577148	1	NaN	NaN	NaN	NaN	1278	0	1	2533	3807
20140904-PurClathDigest-1ug-01	3814	35.202	13.566	3783400	0	NaN	570430	0.36	-	-1		0	157	783.703835952086	2348.08967845646	3	MULTI	HCD	FTMS	0	0	0	-1	0	0	0	0	7				NaN	1	NaN	NaN	NaN	NaN	1279	0	1	2533	3807
20140904-PurClathDigest-1ug-01	3816	35.213	6.163	11871000	0	NaN	1235200	0.39	+	920	ESKEETPGTEWEK	13	154	775.354547195339	1548.69454145748	2	MULTI	HCD	FTMS	0	0	0	-1	0	0	0	0	1	Unmodified	_ESKEETPGTEWEK_	G3N252;P04975	203.183197021484	1	NaN	NaN	NaN	NaN	1280	0	1	2534	3815
20140904-PurClathDigest-1ug-01	3817	35.217	7.361	800900	0	NaN	226330	0.35	-	-1		0	51	517.238817783171	1548.69462394971	3	MULTI	HCD	FTMS	0	0	0	-1	0	0	0	0	2				NaN	1	NaN	NaN	NaN	NaN	1281	0	1	2534	3815
20140904-PurClathDigest-1ug-01	3818	35.22	11.822	2773300	0	NaN	196070	0.36	-	-1		0	132	639.051795124005	2552.17807462962	4	MULTI	HCD	FTMS	0	0	0	-1	0	0	0	0	3				NaN	1	NaN	NaN	NaN	NaN	1282	0	1	2534	3815
20140904-PurClathDigest-1ug-01	3819	35.223	18.904	12445000	0	NaN	1011400	0.37	+	4738	VMEYINR	7	181	471.223045416866	940.431537900533	2	MULTI	HCD	FTMS	0	0	0	-1	0	0	0	0	4	Oxidation (M),Deamidation (NQ)	_VM(ox)EYIN(de)R_	P49951;F1MPU0	70.6539764404297	1	NaN	NaN	NaN	NaN	1283	0	1	2534	3815
20140904-PurClathDigest-1ug-01	3820	35.226	19.31	1424500	0	NaN	395290	0.36	-	-1		0	85	487.761284419253	973.508015905306	2	MULTI	HCD	FTMS	0	0	0	-1	0	0	0	0	5				NaN	1	NaN	NaN	NaN	NaN	1284	0	1	2534	3815
20140904-PurClathDigest-1ug-01	3821	35.229	10.242	7548500	0	NaN	446790	0.36	-	-1		0	178	511.443105530663	2552.17914532031	5	MULTI	HCD	FTMS	0	0	0	-1	0	0	0	0	6				NaN	1	NaN	NaN	NaN	NaN	1285	0	1	2534	3815
20140904-PurClathDigest-1ug-01	3822	35.232	29.554	2262800	0	NaN	484330	0.38	+	2942	LTQEPESIR	9	104	536.784898277178	1071.55524362116	2	MULTI	HCD	FTMS	0	0	0	-1	0	0	0	0	7	Unmodified	_LTQEPESIR_	G3N252;P04975	164.511001586914	1	NaN	NaN	NaN	NaN	1286	0	1	2534	3815
20140904-PurClathDigest-1ug-01	3824	35.243	1.113	125170000	0	NaN	13212000	0.39	+	4713	VMEQEWR	7	125	497.226604780653	992.438656628106	2	MULTI	HCD	FTMS	0	0	0	-1	0	0	0	0	1	Oxidation (M)	_VM(ox)EQEWR_	G3N252;P04975	102.988296508789	1	NaN	NaN	NaN	NaN	1287	0	1	2535	3823
20140904-PurClathDigest-1ug-01	3825	35.247	1.116	124150000	0	NaN	15927000	0.34	-	-1		0	105	391.217361944546	780.420170955892	2	MULTI	HCD	FTMS	0	0	0	-1	0	0	0	0	2				NaN	1	NaN	NaN	NaN	NaN	1288	0	1	2535	3823
20140904-PurClathDigest-1ug-01	3826	35.249	1.581	97184000	0	NaN	16140000	0.34	-	-1		0	124	446.239258783011	890.463964632823	2	MULTI	HCD	FTMS	0	0	0	-1	0	0	0	0	3				NaN	1	NaN	NaN	NaN	NaN	1289	0	1	2535	3823
20140904-PurClathDigest-1ug-01	3827	35.252	10.303	1347300	0	NaN	399760	0.35	-	-1		0	43	372.716490971064	743.418429008928	2	MULTI	HCD	FTMS	0	0	0	-1	0	0	0	0	4				NaN	1	NaN	NaN	NaN	NaN	1290	0	1	2535	3823
20140904-PurClathDigest-1ug-01	3828	35.255	11.268	6251800	0	NaN	561980	0.35	-	-1		0	101	356.193138586736	1065.55758636041	3	MULTI	HCD	FTMS	0	0	0	-1	0	0	0	0	5				NaN	1	NaN	NaN	NaN	NaN	1291	0	1	2535	3823
20140904-PurClathDigest-1ug-01	3829	35.258	13.489	1502900	0	NaN	117260	0.36	-	-1		0	125	851.733336917416	2552.17818135245	3	MULTI	HCD	FTMS	0	0	0	-1	0	0	0	0	6				NaN	1	NaN	NaN	NaN	NaN	1292	0	1	2535	3823
20140904-PurClathDigest-1ug-01	3830	35.261	21.164	1337000	0	NaN	98122	0.37	+	1031	EWYQETHEK	9	91	625.278126877391	1248.54170082158	2	MULTI	HCD	FTMS	0	0	0	-1	0	0	0	0	7	Unmodified	_EWYQETHEK_	F1N1S2	112.411201477051	1	NaN	NaN	NaN	NaN	1293	0	1	2535	3823
20140904-PurClathDigest-1ug-01	3832	35.272	10.995	704250	0	NaN	61399	0.4	-	-1		0	45	465.227539299468	928.440525665737	2	MULTI	HCD	FTMS	0	0	0	-1	0	0	0	0	1				NaN	1	NaN	NaN	NaN	NaN	1294	0	1	2536	3831
20140904-PurClathDigest-1ug-01	3833	35.276	12.35	2221200	0	NaN	195960	0.36	-	-1		0	116	611.30489046353	1220.59522799386	2	MULTI	HCD	FTMS	0	0	0	-1	0	0	0	0	2				NaN	1	NaN	NaN	NaN	NaN	1295	0	1	2536	3831
20140904-PurClathDigest-1ug-01	3834	35.279	17.278	71180	0	NaN	20735	0.37	-	-1		0	20	1271.57594490741	2541.13733688163	2	MULTI	HCD	FTMS	0	0	0	-1	0	0	0	0	3				NaN	1	NaN	NaN	NaN	NaN	1296	0	1	2536	3831
20140904-PurClathDigest-1ug-01	3835	35.282	24.547	2200100	0	NaN	130700	0.38	+	1326	GSATGLSLKKEEEEEEASK	19	186	1011.49750671135	2020.98046048951	2	MULTI	HCD	FTMS	0	0	0	-1	0	0	0	0	4	Unmodified	_GSATGLSLKKEEEEEEASK_	Q08DH7	263.180114746094	1	NaN	NaN	NaN	NaN	1297	0	1	2536	3831
20140904-PurClathDigest-1ug-01	3836	35.285	16.11	85952	0	NaN	19841	0.37	-	-1		0	25	1033.47099280023	3097.39114900089	3	MULTI	HCD	FTMS	0	0	0	-1	0	0	0	0	5				NaN	1	NaN	NaN	NaN	NaN	1298	0	1	2536	3831
20140904-PurClathDigest-1ug-01	3837	35.288	22.193	2151400	0	NaN	385810	0.37	-	-1		0	93	533.785419995097	1065.55628705699	2	MULTI	HCD	FTMS	0	0	0	-1	0	0	0	0	6				NaN	1	NaN	NaN	NaN	NaN	1299	0	1	2536	3831
20140904-PurClathDigest-1ug-01	3838	35.291	21.717	2037500	0	NaN	136760	0.37	-	-1		0	79	440.724878837386	879.435204741571	2	MULTI	HCD	FTMS	0	0	0	-1	0	0	0	0	7				NaN	1	NaN	NaN	NaN	NaN	1300	0	1	2536	3831
20140904-PurClathDigest-1ug-01	3840	35.303	14.161	111350	0	NaN	18235	0.38	-	-1		0	27	506.252402484737	2020.98050407255	4	MULTI	HCD	FTMS	0	0	0	-1	0	0	0	0	1				NaN	1	NaN	NaN	NaN	NaN	1301	0	1	2537	3839
20140904-PurClathDigest-1ug-01	3841	35.306	30.312	662010	0	NaN	162480	0.38	-	-1		0	71	553.249220535338	1104.48388813748	2	MULTI	HCD	FTMS	0	0	0	-1	0	0	0	0	2				NaN	1	NaN	NaN	NaN	NaN	1302	0	1	2537	3839
20140904-PurClathDigest-1ug-01	3842	35.309	33.556	1027400	0	NaN	368210	0.38	+	3670	RSYVSSSEMVVGGR	14	97	765.373489426954	1528.73242592071	2	MULTI	HCD	FTMS	0	0	0	-1	0	0	0	0	3	Oxidation (M)	_RSYVSSSEM(ox)VVGGR_	Q28115	36.8293304443359	1	NaN	NaN	NaN	NaN	1303	0	1	2537	3839
20140904-PurClathDigest-1ug-01	3843	35.313	16.11	226720	0	NaN	108620	0.36	-	-1		0	36	426.537930802315	NaN	0	PEAK	HCD	FTMS	0	0	0	-1	0	0	0	0	4				NaN	1	NaN	NaN	NaN	NaN	1304	0	1	2537	3839
20140904-PurClathDigest-1ug-01	3844	35.315	24.093	57108	0	NaN	7564.8	0.38	-	-1		0	27	1364.2858052262	4089.83558627881	3	MULTI	HCD	FTMS	0	0	0	-1	0	0	0	0	5				NaN	1	NaN	NaN	NaN	NaN	1305	0	1	2537	3839
20140904-PurClathDigest-1ug-01	3845	35.319	37.408	500770	0	NaN	100280	0.38	-	-1		0	54	322.163680570415	642.312808207631	2	MULTI	HCD	FTMS	0	0	0	-1	0	0	0	0	6				NaN	1	NaN	NaN	NaN	NaN	1306	0	1	2537	3839
20140904-PurClathDigest-1ug-01	3846	35.322	44.315	209440	0	NaN	25458	0.39	+	2489	LEALDANSR	9	50	494.756928540066	987.499304146931	2	MULTI	HCD	FTMS	0	0	0	-1	0	0	0	0	7	Unmodified	_LEALDANSR_	P04973	83.4388427734375	1	NaN	NaN	NaN	NaN	1307	0	1	2537	3839
20140904-PurClathDigest-1ug-01	3848	35.334	3.576	9509400	0	NaN	621260	0.37	+	3589	RPISADSAIMNPASK	15	108	787.402947251382	1572.79134156956	2	MULTI	HCD	FTMS	0	0	0	-1	0	0	0	0	1	Oxidation (M)	_RPISADSAIM(ox)NPASK_	P49951;F1MPU0	77.4933166503906	1	NaN	NaN	NaN	NaN	1308	0	1	2538	3847
20140904-PurClathDigest-1ug-01	3849	35.337	2.567	8907500	0	NaN	471060	0.35	+	1328	GSATGLSLKKEEEEEEASK	19	114	674.667615626543	2020.98101747983	3	MULTI	HCD	FTMS	0	0	0	-1	0	0	0	0	2	Unmodified	_GSATGLSLKKEEEEEEASK_	Q08DH7	106.645698547363	1	NaN	NaN	NaN	NaN	1309	0	1	2538	3847
20140904-PurClathDigest-1ug-01	3850	35.34	31.69	906330	0	NaN	157350	0.38	-	-1		0	77	414.240473712222	826.466394491243	2	MULTI	HCD	FTMS	0	0	0	-1	0	0	0	0	3				NaN	1	NaN	NaN	NaN	NaN	1310	0	1	2538	3847
20140904-PurClathDigest-1ug-01	3851	35.343	40.818	773380	0	NaN	128610	0.39	+	3201	NMQDMVEDYR	10	110	666.763850127028	1331.51314732086	2	MULTI	HCD	FTMS	0	0	0	-1	0	0	0	0	4	2 Oxidation (M)	_NM(ox)QDM(ox)VEDYR_	CON__P04264	84.4574432373047	1	NaN	NaN	NaN	NaN	1311	0	1	2538	3847
20140904-PurClathDigest-1ug-01	3852	35.347	32.894	22759	0	NaN	3332.8	0.38	-	-1		0	14	1178.86638825857	3533.5773353759	3	MULTI	HCD	FTMS	0	0	0	-1	0	0	0	0	5				NaN	1	NaN	NaN	NaN	NaN	1312	0	1	2538	3847
20140904-PurClathDigest-1ug-01	3853	35.35	53.441	15666	0	NaN	2677.8	0.42	-	-1		0	15	1336.70570107482	2671.39684921644	2	MULTI	HCD	FTMS	0	0	0	-1	0	0	0	0	6				NaN	1	NaN	NaN	NaN	NaN	1313	0	1	2538	3847
20140904-PurClathDigest-1ug-01	3854	35.354	97.644	325890	0	NaN	46179	0.43	-	-1		0	103	686.299976192522	685.292699725922	1	MULTI	HCD	FTMS	0	0	0	-1	0	0	0	0	7				NaN	1	NaN	NaN	NaN	NaN	1314	0	1	2538	3847
20140904-PurClathDigest-1ug-01	3856	35.367	5.419	3101300	0	NaN	920520	0.37	+	696	DVDGATLAR	9	58	459.237700645193	916.460848357186	2	MULTI	HCD	FTMS	0	0	0	-1	0	0	0	0	1	Unmodified	_DVDGATLAR_	Q08DH7	97.1045532226563	1	NaN	NaN	NaN	NaN	1315	0	1	2539	3855
20140904-PurClathDigest-1ug-01	3857	35.37	5.732	2440300	0	NaN	220660	0.35	+	3596	RPISADSAIMNPASK	15	79	525.271299002351	1572.79206760725	3	MULTI	HCD	FTMS	0	0	0	-1	0	0	0	0	2	Oxidation (M)	_RPISADSAIM(ox)NPASK_	P49951;F1MPU0	86.399040222168	1	NaN	NaN	NaN	NaN	1316	0	1	2539	3855
20140904-PurClathDigest-1ug-01	3858	35.373	13.655	4626500	0	NaN	498380	0.35	+	3101	NAELLR	6	76	358.208766731831	714.402980530463	2	MULTI	HCD	FTMS	0	0	0	-1	0	0	0	0	3	Unmodified	_NAELLR_	Q28115	104.706596374512	1	NaN	NaN	NaN	NaN	1317	0	1	2539	3855
20140904-PurClathDigest-1ug-01	3859	35.376	27.462	1028800	0	NaN	267520	0.37	-	-1		0	61	370.718795254099	739.423037574997	2	MULTI	HCD	FTMS	0	0	0	-1	0	0	0	0	4				NaN	1	NaN	NaN	NaN	NaN	1318	0	1	2539	3855
20140904-PurClathDigest-1ug-01	3860	35.379	45.707	1339900	0	NaN	171600	0.39	+	4731	VMEYINR	7	86	470.731193761123	939.447834589046	2	MULTI	HCD	FTMS	0	0	0	-1	0	0	0	0	5	Oxidation (M)	_VM(ox)EYINR_	P49951;F1MPU0	99.9583969116211	1	NaN	NaN	NaN	NaN	1319	0	1	2539	3855
20140904-PurClathDigest-1ug-01	3861	35.382	29.519	34548	0	NaN	4478.7	0.38	-	-1		0	20	1190.89994912964	3569.67801798913	3	MULTI	HCD	FTMS	0	0	0	-1	0	0	0	0	6				NaN	1	NaN	NaN	NaN	NaN	1320	0	1	2539	3855
20140904-PurClathDigest-1ug-01	3862	35.386	38.665	22388	0	NaN	1822.1	0.39	-	-1		0	18	1162.52927703701	4646.08800228164	4	MULTI	HCD	FTMS	0	0	0	-1	0	0	0	0	7				NaN	1	NaN	NaN	NaN	NaN	1321	0	1	2539	3855
20140904-PurClathDigest-1ug-01	3864	35.398	13.525	2064600	0	NaN	186170	0.38	-	-1		0	142	605.298152566376	1812.87262829933	3	MULTI	HCD	FTMS	0	0	0	-1	0	0	0	0	1				NaN	1	NaN	NaN	NaN	NaN	1322	0	1	2540	3863
20140904-PurClathDigest-1ug-01	3865	35.401	22.077	3376500	0	NaN	834790	0.37	+	337	AQALLER	7	76	400.735331589706	799.456110246213	2	MULTI	HCD	FTMS	0	0	0	-1	0	0	0	0	2	Unmodified	_AQALLER_	Q08DH7	116.529197692871	1	NaN	NaN	NaN	NaN	1323	0	1	2540	3863
20140904-PurClathDigest-1ug-01	3866	35.404	40.748	995860	0	NaN	64945	0.39	-	-1		0	169	907.441077862753	1812.86760279231	2	MULTI	HCD	FTMS	0	0	0	-1	0	0	0	0	3				NaN	1	NaN	NaN	NaN	NaN	1324	0	1	2540	3863
20140904-PurClathDigest-1ug-01	3867	35.407	34.905	586770	0	NaN	62599	0.38	-	-1		0	115	612.966000026611	1835.87617068003	3	MULTI	HCD	FTMS	0	0	0	-1	0	0	0	0	4				NaN	1	NaN	NaN	NaN	NaN	1325	0	1	2540	3863
20140904-PurClathDigest-1ug-01	3868	35.411	41.84	323830	0	NaN	48398	0.39	-	-1		0	77	663.985325092139	1988.93414587662	3	MULTI	HCD	FTMS	0	0	0	-1	0	0	0	0	5				NaN	1	NaN	NaN	NaN	NaN	1326	0	1	2540	3863
20140904-PurClathDigest-1ug-01	3869	35.414	47.322	31353	0	NaN	5560.1	0.4	-	-1		0	20	1220.5884794953	2439.16240605741	2	MULTI	HCD	FTMS	0	0	0	-1	0	0	0	0	6				NaN	1	NaN	NaN	NaN	NaN	1327	0	1	2540	3863
20140904-PurClathDigest-1ug-01	3870	35.418	54.379	209830	0	NaN	19007	0.39	-	-1		0	59	380.21630489949	758.41805686578	2	MULTI	HCD	FTMS	0	0	0	-1	0	0	0	0	7				NaN	1	NaN	NaN	NaN	NaN	1328	0	1	2540	3863
20140904-PurClathDigest-1ug-01	3872	35.43	3.432	6480500	0	NaN	1793700	0.36	-	-1		0	76	694.293420070366	1386.57228720753	2	MULTI	HCD	FTMS	0	0	0	-1	0	0	0	0	1				NaN	1	NaN	NaN	NaN	NaN	1329	0	1	2541	3871
20140904-PurClathDigest-1ug-01	3873	35.433	6.938	21372000	0	NaN	4167000	0.34	+	107	AGLLQR	6	84	329.205669831932	656.396786730665	2	MULTI	HCD	FTMS	0	0	0	-1	0	0	0	0	2	Unmodified	_AGLLQR_	P49951;F1MPU0	102.375801086426	1	NaN	NaN	NaN	NaN	1330	0	1	2541	3871
20140904-PurClathDigest-1ug-01	3874	35.436	11.968	1990900	0	NaN	158010	0.35	-	-1		0	84	465.766383970697	929.518215008194	2	MULTI	HCD	FTMS	0	0	0	-1	0	0	0	0	3				NaN	1	NaN	NaN	NaN	NaN	1331	0	1	2541	3871
20140904-PurClathDigest-1ug-01	3875	35.439	28.53	842020	0	NaN	74260	0.37	-	-1		0	63	522.225395314758	1042.43623769632	2	MULTI	HCD	FTMS	0	0	0	-1	0	0	0	0	4				NaN	1	NaN	NaN	NaN	NaN	1332	0	1	2541	3871
20140904-PurClathDigest-1ug-01	3876	35.442	30.793	543560	0	NaN	46051	0.38	-	-1		0	99	618.60399700404	1852.79016161232	3	MULTI	HCD	FTMS	0	0	0	-1	0	0	0	0	5				NaN	1	NaN	NaN	NaN	NaN	1333	0	1	2541	3871
20140904-PurClathDigest-1ug-01	3877	35.445	37.414	51981	0	NaN	13129	0.39	-	-1		0	29	979.429836025166	2935.2676786757	3	MULTI	HCD	FTMS	0	0	0	-1	0	0	0	0	6				NaN	1	NaN	NaN	NaN	NaN	1334	0	1	2541	3871
20140904-PurClathDigest-1ug-01	3878	35.449	93.513	82927	0	NaN	5903.6	0.44	-	-1		0	64	1075.43368471683	1074.42640825023	1	MULTI	HCD	FTMS	0	0	0	-1	0	0	0	0	7				NaN	1	NaN	NaN	NaN	NaN	1335	0	1	2541	3871
20140904-PurClathDigest-1ug-01	3880	35.461	0.532	45132000	0	NaN	5872900	0.38	+	921	ESKEETPGTEWEK	13	106	775.354547195339	1548.69454145748	2	MULTI	HCD	FTMS	0	0	0	-1	0	0	0	0	1	Unmodified	_ESKEETPGTEWEK_	G3N252;P04975	155.387405395508	1	NaN	NaN	NaN	NaN	1336	0	1	2542	3879
20140904-PurClathDigest-1ug-01	3881	35.465	0.735	10455000	0	NaN	871280	0.35	+	925	ESKEETPGTEWEK	13	75	517.238817783171	1548.69462394971	3	MULTI	HCD	FTMS	0	0	0	-1	0	0	0	0	2	Unmodified	_ESKEETPGTEWEK_	G3N252;P04975	56.0257301330566	1	NaN	NaN	NaN	NaN	1337	0	1	2542	3879
20140904-PurClathDigest-1ug-01	3882	35.467	12.263	854750	0	NaN	131650	0.36	-	-1		0	82	639.051795124005	2552.17807462962	4	MULTI	HCD	FTMS	0	0	0	-1	0	0	0	0	3				NaN	1	NaN	NaN	NaN	NaN	1338	0	1	2542	3879
20140904-PurClathDigest-1ug-01	3883	35.471	11.849	1577000	0	NaN	127740	0.35	-	-1		0	102	511.443105530663	2552.17914532031	5	MULTI	HCD	FTMS	0	0	0	-1	0	0	0	0	4				NaN	1	NaN	NaN	NaN	NaN	1339	0	1	2542	3879
20140904-PurClathDigest-1ug-01	3884	35.473	31.213	1844000	0	NaN	124580	0.38	+	2837	LQELDAASK	9	105	487.761284419253	973.508015905306	2	MULTI	HCD	FTMS	0	0	0	-1	0	0	0	0	5	Unmodified	_LQELDAASK_	G3N252;P04975	89.518798828125	1	NaN	NaN	NaN	NaN	1340	0	1	2542	3879
20140904-PurClathDigest-1ug-01	3885	35.477	41.865	1436900	0	NaN	321780	0.39	+	3720	SAQEEISEYRR	11	131	684.331462910176	1366.64837288715	2	MULTI	HCD	FTMS	0	0	0	-1	0	0	0	0	6	Unmodified	_SAQEEISEYRR_	F1MSQ6	184.160598754883	1	NaN	NaN	NaN	NaN	1341	0	1	2542	3879
20140904-PurClathDigest-1ug-01	3886	35.48	34.286	36044	0	NaN	2029.7	0.38	-	-1		0	28	1003.98218522056	2005.94981750792	2	MULTI	HCD	FTMS	0	0	0	-1	0	0	0	0	7				NaN	1	NaN	NaN	NaN	NaN	1342	0	1	2542	3879
20140904-PurClathDigest-1ug-01	3888	35.492	0.568	106250000	0	NaN	24954000	0.37	-	-1		0	98	446.239258783011	890.463964632823	2	MULTI	HCD	FTMS	0	0	0	-1	0	0	0	0	1				NaN	1	NaN	NaN	NaN	NaN	1343	0	1	2543	3887
20140904-PurClathDigest-1ug-01	3889	35.495	1.409	36274000	0	NaN	5123100	0.35	+	4714	VMEQEWR	7	81	497.226604780653	992.438656628106	2	MULTI	HCD	FTMS	0	0	0	-1	0	0	0	0	2	Oxidation (M)	_VM(ox)EQEWR_	G3N252;P04975	122.712303161621	1	NaN	NaN	NaN	NaN	1344	0	1	2543	3887
20140904-PurClathDigest-1ug-01	3890	35.498	12.254	3013800	0	NaN	436840	0.35	-	-1		0	62	391.217361944546	780.420170955892	2	MULTI	HCD	FTMS	0	0	0	-1	0	0	0	0	3				NaN	1	NaN	NaN	NaN	NaN	1345	0	1	2543	3887
20140904-PurClathDigest-1ug-01	3891	35.501	41.214	572970	0	NaN	82729	0.39	-	-1		0	93	845.359443656615	1688.70433438003	2	MULTI	HCD	FTMS	0	0	0	-1	0	0	0	0	4				NaN	1	NaN	NaN	NaN	NaN	1346	0	1	2543	3887
20140904-PurClathDigest-1ug-01	3892	35.504	42.279	445750	0	NaN	70278	0.39	+	2943	LTQEPESIR	9	87	536.784898277178	1071.55524362116	2	MULTI	HCD	FTMS	0	0	0	-1	0	0	0	0	5	Unmodified	_LTQEPESIR_	G3N252;P04975	95.5646820068359	1	NaN	NaN	NaN	NaN	1347	0	1	2543	3887
20140904-PurClathDigest-1ug-01	3893	35.508	69.856	900050	0	NaN	245900	0.42	-	-1		0	134	995.976629215338	1989.93870549748	2	MULTI	HCD	FTMS	0	0	0	-1	0	0	0	0	6				NaN	1	NaN	NaN	NaN	NaN	1348	0	1	2543	3887
20140904-PurClathDigest-1ug-01	3894	35.512	90.853	10971	0	NaN	1113.6	0.44	-	-1		0	19	1103.55417001066	2205.09378708812	2	MULTI	HCD	FTMS	0	0	0	-1	0	0	0	0	7				NaN	1	NaN	NaN	NaN	NaN	1349	0	1	2543	3887
20140904-PurClathDigest-1ug-01	3896	35.524	8.706	136730	0	NaN	9694.5	0.38	-	-1		0	25	1033.47099280023	3097.39114900089	3	MULTI	HCD	FTMS	0	0	0	-1	0	0	0	0	1				NaN	1	NaN	NaN	NaN	NaN	1350	0	1	2544	3895
20140904-PurClathDigest-1ug-01	3897	35.528	10.18	2412100	0	NaN	105130	0.36	-	-1		0	130	604.940933825037	1811.80097207531	3	MULTI	HCD	FTMS	0	0	0	-1	0	0	0	0	2				NaN	1	NaN	NaN	NaN	NaN	1351	0	1	2544	3895
20140904-PurClathDigest-1ug-01	3898	35.531	55.791	16421	0	NaN	2483.2	0.41	-	-1		0	18	1271.57594490741	2541.13733688163	2	MULTI	HCD	FTMS	0	0	0	-1	0	0	0	0	3				NaN	1	NaN	NaN	NaN	NaN	1352	0	1	2544	3895
20140904-PurClathDigest-1ug-01	3899	35.534	78.483	184100	0	NaN	13675	0.43	+	1327	GSATGLSLKKEEEEEEASK	19	111	1011.49750671135	2020.98046048951	2	MULTI	HCD	FTMS	0	0	0	-1	0	0	0	0	4	Unmodified	_GSATGLSLKKEEEEEEASK_	Q08DH7	190.207901000977	1	NaN	NaN	NaN	NaN	1353	0	1	2544	3895
20140904-PurClathDigest-1ug-01	3900	35.538	130.78	273530	0	NaN	68857	0.48	-	-1		0	103	770.292319729506	1538.57008652581	2	MULTI	HCD	FTMS	0	0	0	-1	0	0	0	0	5				NaN	1	NaN	NaN	NaN	NaN	1354	0	1	2544	3895
20140904-PurClathDigest-1ug-01	3901	35.543	137.86	299930	0	NaN	46710	0.48	-	-1		0	127	795.400818648717	1588.78708436423	2	MULTI	HCD	FTMS	0	0	0	-1	0	0	0	0	6				NaN	1	NaN	NaN	NaN	NaN	1355	0	1	2544	3895
20140904-PurClathDigest-1ug-01	3902	35.548	128.74	360780	0	NaN	27223	0.48	+	1334	GSDGAASSYQLK	12	126	592.282619785227	1182.55068663725	2	MULTI	HCD	FTMS	0	0	0	-1	0	0	0	0	7	Unmodified	_GSDGAASSYQLK_	F1MIC9	125.418998718262	1	NaN	NaN	NaN	NaN	1356	0	1	2544	3895
20140904-PurClathDigest-1ug-01	3904	35.562	6.382	9679500	0	NaN	704780	0.37	+	3721	SAQEEISEYRR	11	121	456.556525166645	1366.64774610013	3	MULTI	HCD	FTMS	0	0	0	-1	0	0	0	0	1	Unmodified	_SAQEEISEYRR_	F1MSQ6	121.773696899414	1	NaN	NaN	NaN	NaN	1357	0	1	2545	3903
20140904-PurClathDigest-1ug-01	3905	35.565	44.979	1105900	0	NaN	51099	0.39	-	-1		0	169	906.9098239042	1811.8050948752	2	MULTI	HCD	FTMS	0	0	0	-1	0	0	0	0	2				NaN	1	NaN	NaN	NaN	NaN	1358	0	1	2545	3903
20140904-PurClathDigest-1ug-01	3906	35.569	58.745	342600	0	NaN	111620	0.4	-	-1		0	48	440.724878837386	879.435204741571	2	MULTI	HCD	FTMS	0	0	0	-1	0	0	0	0	3				NaN	1	NaN	NaN	NaN	NaN	1359	0	1	2545	3903
20140904-PurClathDigest-1ug-01	3907	35.572	112.53	524710	0	NaN	57910	0.46	+	1191	GEIDAHEDSFK	11	131	624.280686479935	1246.54682002667	2	MULTI	HCD	FTMS	0	0	0	-1	0	0	0	0	4	Unmodified	_GEIDAHEDSFK_	E1BFB0	164.252502441406	1	NaN	NaN	NaN	NaN	1360	0	1	2545	3903
20140904-PurClathDigest-1ug-01	3908	35.577	79.383	699710	0	NaN	55150	0.42	+	4663	VIQQSLEQEETEHK	14	168	566.616047800574	1696.82631400192	3	MULTI	HCD	FTMS	0	0	0	-1	0	0	0	0	5	Unmodified	_VIQQSLEQEETEHK_	Q28021;F1N319	161.000198364258	1	NaN	NaN	NaN	NaN	1361	0	1	2545	3903
20140904-PurClathDigest-1ug-01	3909	35.581	89.997	17544	0	NaN	2948.1	0.44	-	-1		0	23	1080.14158153568	3237.40291520724	3	MULTI	HCD	FTMS	0	0	0	-1	0	0	0	0	6				NaN	1	NaN	NaN	NaN	NaN	1362	0	1	2545	3903
20140904-PurClathDigest-1ug-01	3910	35.585	138.54	990980	0	NaN	98162	0.49	+	4468	VDHGAEIITQSPGR	14	151	740.381423101929	1478.74829327066	2	MULTI	HCD	FTMS	0	0	0	-1	0	0	0	0	7	Unmodified	_VDHGAEIITQSPGR_	F1MEW3	231.895492553711	1	NaN	NaN	NaN	NaN	1363	0	1	2545	3903
20140904-PurClathDigest-1ug-01	3912	35.599	9.311	3987200	0	NaN	267410	0.39	+	3590	RPISADSAIMNPASK	15	110	787.402947251382	1572.79134156956	2	MULTI	HCD	FTMS	0	0	0	-1	0	0	0	0	1	Oxidation (M)	_RPISADSAIM(ox)NPASK_	P49951;F1MPU0	103.663299560547	1	NaN	NaN	NaN	NaN	1364	0	1	2546	3911
20140904-PurClathDigest-1ug-01	3913	35.602	25.955	2839000	0	NaN	481030	0.37	+	4476	VDKLDASESLR	11	122	616.827114476943	1231.63967602069	2	MULTI	HCD	FTMS	0	0	0	-1	0	0	0	0	2	Unmodified	_VDKLDASESLR_	P49951;F1MPU0	151.185806274414	1	NaN	NaN	NaN	NaN	1365	0	1	2546	3911
20140904-PurClathDigest-1ug-01	3914	35.605	23.13	4370100	0	NaN	316290	0.37	+	4485	VDKLDASESLR	11	130	411.554129254164	1231.64055836269	3	MULTI	HCD	FTMS	0	0	0	-1	0	0	0	0	3	Unmodified	_VDKLDASESLR_	P49951;F1MPU0	112.636199951172	1	NaN	NaN	NaN	NaN	1366	0	1	2546	3911
20140904-PurClathDigest-1ug-01	3915	35.608	30.709	776940	0	NaN	88495	0.38	+	4470	VDHGAEIITQSPGR	14	86	493.923407127447	1478.74839198254	3	MULTI	HCD	FTMS	0	0	0	-1	0	0	0	0	4	Unmodified	_VDHGAEIITQSPGR_	F1MEW3	107.150497436523	1	NaN	NaN	NaN	NaN	1367	0	1	2546	3911
20140904-PurClathDigest-1ug-01	3916	35.612	58.301	329350	0	NaN	24102	0.4	+	4302	TPVEAASSDQSSEATKAPGLR	21	96	701.350161039468	2101.0286537186	3	MULTI	HCD	FTMS	0	0	0	-1	0	0	0	0	5	Unmodified	_TPVEAASSDQSSEATKAPGLR_	F1MQZ0;E1BP30	159.81559753418	1	NaN	NaN	NaN	NaN	1368	0	1	2546	3911
20140904-PurClathDigest-1ug-01	3917	35.615	44.711	148200	0	NaN	8452.4	0.39	-	-1		0	62	511.236150835674	1530.68662310722	3	MULTI	HCD	FTMS	0	0	0	-1	0	0	0	0	6				NaN	1	NaN	NaN	NaN	NaN	1369	0	1	2546	3911
20140904-PurClathDigest-1ug-01	3918	35.619	101.63	155440	0	NaN	27813	0.45	-	-1		0	115	1105.10347144157	NaN	0	PEAK	HCD	FTMS	0	0	0	-1	0	0	0	0	7				NaN	1	NaN	NaN	NaN	NaN	1370	0	1	2546	3911
20140904-PurClathDigest-1ug-01	3920	35.632	13.148	962430	0	NaN	74389	0.39	+	3597	RPISADSAIMNPASK	15	82	525.271299002351	1572.79206760725	3	MULTI	HCD	FTMS	0	0	0	-1	0	0	0	0	1	Oxidation (M)	_RPISADSAIM(ox)NPASK_	P49951;F1MPU0	70.515266418457	1	NaN	NaN	NaN	NaN	1371	0	1	2547	3919
20140904-PurClathDigest-1ug-01	3921	35.635	22.762	2494200	0	NaN	254650	0.37	+	523	DAMQYASESK	10	93	565.245389348734	1128.47622576427	2	MULTI	HCD	FTMS	0	0	0	-1	0	0	0	0	2	Unmodified	_DAMQYASESK_	P49951;F1MPU0	114.93879699707	1	NaN	NaN	NaN	NaN	1372	0	1	2547	3919
20140904-PurClathDigest-1ug-01	3922	35.638	34.482	1052200	0	NaN	188420	0.38	+	3917	SNIEETTISSQK	12	102	668.833083176693	1335.65161342019	2	MULTI	HCD	FTMS	0	0	0	-1	0	0	0	0	3	Unmodified	_SNIEETTISSQK_	Q08DH7	129.884796142578	1	NaN	NaN	NaN	NaN	1373	0	1	2547	3919
20140904-PurClathDigest-1ug-01	3923	35.642	31.662	1401200	0	NaN	229220	0.38	-	-1		0	60	487.255562759587	NaN	0	PEAK	HCD	FTMS	0	0	0	-1	0	0	0	0	4				NaN	1	NaN	NaN	NaN	NaN	1374	0	1	2547	3919
20140904-PurClathDigest-1ug-01	3924	35.645	56.079	1116200	0	NaN	239550	0.4	+	710	DYQELMNTK	9	123	579.26099313372	1156.50743333424	2	MULTI	HCD	FTMS	0	0	0	-1	0	0	0	0	5	Oxidation (M)	_DYQELM(ox)NTK_	G3N0V2;CON__ENSEMBL:ENSBTAP00000038253;CON__P04264;CON__Q3TTY5	120.869300842285	1	NaN	NaN	NaN	NaN	1375	0	1	2547	3919
20140904-PurClathDigest-1ug-01	3925	35.649	83.216	1126900	0	NaN	101360	0.43	+	3035	MLTAQDMSYDEAR	13	147	781.826513281541	1561.63847362988	2	MULTI	HCD	FTMS	0	0	0	-1	0	0	0	0	6	2 Oxidation (M)	_M(ox)LTAQDM(ox)SYDEAR_	F1MYC9	62.8131904602051	1	NaN	NaN	NaN	NaN	1376	0	1	2547	3919
20140904-PurClathDigest-1ug-01	3926	35.653	75.884	467820	0	NaN	93766	0.42	-	-1		0	81	547.267651069401	1092.5207492056	2	MULTI	HCD	FTMS	0	0	0	-1	0	0	0	0	7				NaN	1	NaN	NaN	NaN	NaN	1377	0	1	2547	3919
20140904-PurClathDigest-1ug-01	3928	35.665	6.72	549590	0	NaN	78852	0.38	-	-1		0	30	567.293454935572	1132.57235693794	2	MULTI	HCD	FTMS	0	0	0	-1	0	0	0	0	1				NaN	1	NaN	NaN	NaN	NaN	1378	0	1	2548	3927
20140904-PurClathDigest-1ug-01	3929	35.668	7.631	5925500	0	NaN	1485700	0.35	+	-1	AQALLER	7	73	400.735331589706	799.456110246213	2	MULTI	HCD	FTMS	0	0	0	-1	0	0	0	0	2	Unmodified	_AQALLER_	Q08DH7	139.266693115234	1	NaN	NaN	NaN	NaN	1379	0	1	2548	3927
20140904-PurClathDigest-1ug-01	3930	35.671	10.016	11519000	0	NaN	4065100	0.36	+	650	DQGGAGEGLVR	11	115	529.764572582605	1057.51459223201	2	MULTI	HCD	FTMS	0	0	0	-1	0	0	0	0	3	Unmodified	_DQGGAGEGLVR_	F1MEW3	110.324501037598	1	NaN	NaN	NaN	NaN	1380	0	1	2548	3927
20140904-PurClathDigest-1ug-01	3931	35.674	24.925	778690	0	NaN	46848	0.37	-	-1		0	119	905.962883101944	1809.91121327069	2	MULTI	HCD	FTMS	0	0	0	-1	0	0	0	0	4				NaN	1	NaN	NaN	NaN	NaN	1381	0	1	2548	3927
20140904-PurClathDigest-1ug-01	3932	35.677	50.271	48641	0	NaN	4886.1	0.4	-	-1		0	34	927.785659971111	2780.33515051353	3	MULTI	HCD	FTMS	0	0	0	-1	0	0	0	0	5				NaN	1	NaN	NaN	NaN	NaN	1382	0	1	2548	3927
20140904-PurClathDigest-1ug-01	3933	35.681	58.687	465690	0	NaN	26629	0.41	-	-1		0	129	732.69018366168	2195.04872158524	3	MULTI	HCD	FTMS	0	0	0	-1	0	0	0	0	6				NaN	1	NaN	NaN	NaN	NaN	1383	0	1	2548	3927
20140904-PurClathDigest-1ug-01	3934	35.685	90.552	2220300	0	NaN	147500	0.44	+	3897	SNEKEQLQGLNDR	13	187	766.371795468318	1530.72903800344	2	MULTI	HCD	FTMS	0	0	0	-1	0	0	0	0	7	Deamidation (NQ)	_SNEKEQLQGLN(de)DR_	F1MDZ2	76.6328430175781	1	NaN	NaN	NaN	NaN	1384	0	1	2548	3927
20140904-PurClathDigest-1ug-01	3936	35.697	0.605	136570000	0	NaN	32600000	0.38	+	108	AGLLQR	6	65	329.205669831932	656.396786730665	2	MULTI	HCD	FTMS	0	0	0	-1	0	0	0	0	1	Unmodified	_AGLLQR_	P49951;F1MPU0	102.375801086426	1	NaN	NaN	NaN	NaN	1385	0	1	2549	3935
20140904-PurClathDigest-1ug-01	3937	35.701	19.852	1473100	0	NaN	132150	0.36	+	3440	QPSIAISSK	9	75	465.766383970697	929.518215008194	2	MULTI	HCD	FTMS	0	0	0	-1	0	0	0	0	2	Unmodified	_QPSIAISSK_	F1MDZ2;O77788	75.5423889160156	1	NaN	NaN	NaN	NaN	1386	0	1	2549	3935
20140904-PurClathDigest-1ug-01	3938	35.704	16.806	700500	0	NaN	100680	0.36	-	-1		0	88	604.311989746109	1809.91413983853	3	MULTI	HCD	FTMS	0	0	0	-1	0	0	0	0	3				NaN	1	NaN	NaN	NaN	NaN	1387	0	1	2549	3935
20140904-PurClathDigest-1ug-01	3939	35.707	44.165	48339	0	NaN	4664.1	0.39	-	-1		0	28	455.219125341441	908.423697749682	2	MULTI	HCD	FTMS	0	0	0	-1	0	0	0	0	4				NaN	1	NaN	NaN	NaN	NaN	1388	0	1	2549	3935
20140904-PurClathDigest-1ug-01	3940	35.71	48.072	563180	0	NaN	111890	0.4	-	-1		0	82	509.780006993276	1017.54546105335	2	MULTI	HCD	FTMS	0	0	0	-1	0	0	0	0	5				NaN	1	NaN	NaN	NaN	NaN	1389	0	1	2549	3935
20140904-PurClathDigest-1ug-01	3941	35.714	37.212	22346	0	NaN	2828.5	0.39	-	-1		0	18	822.101251669641	2463.28192560912	3	MULTI	HCD	FTMS	0	0	0	-1	0	0	0	0	6				NaN	1	NaN	NaN	NaN	NaN	1390	0	1	2549	3935
20140904-PurClathDigest-1ug-01	3942	35.717	36.984	2597700	0	NaN	260150	0.38	-	-1		0	173	554.600609901481	1660.78000030464	3	MULTI	HCD	FTMS	0	0	0	-1	0	0	0	0	7				NaN	1	NaN	NaN	NaN	NaN	1391	0	1	2549	3935
20140904-PurClathDigest-1ug-01	3944	35.729	3.009	7985600	0	NaN	985010	0.38	+	922	ESKEETPGTEWEK	13	111	775.354547195339	1548.69454145748	2	MULTI	HCD	FTMS	0	0	0	-1	0	0	0	0	1	Unmodified	_ESKEETPGTEWEK_	G3N252;P04975	188.263397216797	1	NaN	NaN	NaN	NaN	1392	0	1	2550	3943
20140904-PurClathDigest-1ug-01	3945	35.732	5.326	1056900	0	NaN	94477	0.35	+	926	ESKEETPGTEWEK	13	55	517.238817783171	1548.69462394971	3	MULTI	HCD	FTMS	0	0	0	-1	0	0	0	0	2	Unmodified	_ESKEETPGTEWEK_	G3N252;P04975	33.4821014404297	1	NaN	NaN	NaN	NaN	1393	0	1	2550	3943
20140904-PurClathDigest-1ug-01	3946	35.735	17.634	45567	0	NaN	5153.2	0.37	-	-1		0	17	558.288324590334	1114.56209624747	2	MULTI	HCD	FTMS	0	0	0	-1	0	0	0	0	3				NaN	1	NaN	NaN	NaN	NaN	1394	0	1	2550	3943
20140904-PurClathDigest-1ug-01	3947	35.738	16.39	1882200	0	NaN	114570	0.36	-	-1		0	114	549.769649357502	2195.04949156361	4	MULTI	HCD	FTMS	0	0	0	-1	0	0	0	0	4				NaN	1	NaN	NaN	NaN	NaN	1395	0	1	2550	3943
20140904-PurClathDigest-1ug-01	3948	35.741	33.992	3002500	0	NaN	268290	0.38	-	-1		0	142	487.711222703131	973.407892473062	2	MULTI	HCD	FTMS	0	0	0	-1	0	0	0	0	5				NaN	1	NaN	NaN	NaN	NaN	1396	0	1	2550	3943
20140904-PurClathDigest-1ug-01	3949	35.744	34.203	2711800	0	NaN	240080	0.38	+	3415	QLQELEDK	8	105	501.75866561278	1001.50277829236	2	MULTI	HCD	FTMS	0	0	0	-1	0	0	0	0	6	Unmodified	_QLQELEDK_	P02548	135.397903442383	1	NaN	NaN	NaN	NaN	1397	0	1	2550	3943
20140904-PurClathDigest-1ug-01	3950	35.748	61.119	29557	0	NaN	2582.6	0.41	-	-1		0	34	945.025834183783	1888.03711543437	2	MULTI	HCD	FTMS	0	0	0	-1	0	0	0	0	7				NaN	1	NaN	NaN	NaN	NaN	1398	0	1	2550	3943
20140904-PurClathDigest-1ug-01	3952	35.76	2.419	22249000	0	NaN	5364300	0.38	+	308	AMLSANIR	8	85	446.239258783011	890.463964632823	2	MULTI	HCD	FTMS	0	0	0	-1	0	0	0	0	1	Oxidation (M)	_AM(ox)LSANIR_	P49951;F1MPU0	92.3799819946289	1	NaN	NaN	NaN	NaN	1399	0	1	2551	3951
20140904-PurClathDigest-1ug-01	3953	35.763	17.923	3648100	0	NaN	496280	0.36	+	4715	VMEQEWR	7	97	497.226604780653	992.438656628106	2	MULTI	HCD	FTMS	0	0	0	-1	0	0	0	0	2	Oxidation (M)	_VM(ox)EQEWR_	G3N252;P04975	122.712303161621	1	NaN	NaN	NaN	NaN	1400	0	1	2551	3951
20140904-PurClathDigest-1ug-01	3954	35.766	30.561	1281300	0	NaN	382250	0.38	-	-1		0	116	831.397658816712	1660.78076470022	2	MULTI	HCD	FTMS	0	0	0	-1	0	0	0	0	3				NaN	1	NaN	NaN	NaN	NaN	1401	0	1	2551	3951
20140904-PurClathDigest-1ug-01	3955	35.769	19.678	2821800	0	NaN	111580	0.37	-	-1		0	143	650.969443772004	1949.88650191621	3	MULTI	HCD	FTMS	0	0	0	-1	0	0	0	0	4				NaN	1	NaN	NaN	NaN	NaN	1402	0	1	2551	3951
20140904-PurClathDigest-1ug-01	3956	35.773	22.602	1777100	0	NaN	101460	0.37	-	-1		0	137	545.265542424389	1632.77479787337	3	MULTI	HCD	FTMS	0	0	0	-1	0	0	0	0	5				NaN	1	NaN	NaN	NaN	NaN	1403	0	1	2551	3951
20140904-PurClathDigest-1ug-01	3957	35.776	37.845	1181900	0	NaN	170370	0.38	-	-1		0	69	391.217361944546	780.420170955892	2	MULTI	HCD	FTMS	0	0	0	-1	0	0	0	0	6				NaN	1	NaN	NaN	NaN	NaN	1404	0	1	2551	3951
20140904-PurClathDigest-1ug-01	3958	35.779	32.888	1618300	0	NaN	81716	0.38	+	2034	KFEEFQTDMAAHEER	15	147	628.6113600195	1882.8122506587	3	MULTI	HCD	FTMS	0	0	0	-1	0	0	0	0	7	Oxidation (M)	_KFEEFQTDM(ox)AAHEER_	E1BFB0	105.082702636719	1	NaN	NaN	NaN	NaN	1405	0	1	2551	3951
20140904-PurClathDigest-1ug-01	3960	35.791	6.231	4618700	0	NaN	515820	0.37	-	-1		0	102	795.400818648717	1588.78708436423	2	MULTI	HCD	FTMS	0	0	0	-1	0	0	0	0	1				NaN	1	NaN	NaN	NaN	NaN	1406	0	1	2552	3959
20140904-PurClathDigest-1ug-01	3961	35.794	7.003	15285000	0	NaN	2621300	0.35	+	2490	LEALDANSR	9	102	494.756001194817	987.497449456434	2	MULTI	HCD	FTMS	0	0	0	-1	0	0	0	0	2	Unmodified	_LEALDANSR_	P04973	173.586700439453	1	NaN	NaN	NaN	NaN	1407	0	1	2552	3959
20140904-PurClathDigest-1ug-01	3962	35.797	21.499	3803400	0	NaN	424880	0.37	-	-1		0	77	442.24781119232	882.481069451441	2	MULTI	HCD	FTMS	0	0	0	-1	0	0	0	0	3				NaN	1	NaN	NaN	NaN	NaN	1408	0	1	2552	3959
20140904-PurClathDigest-1ug-01	3963	35.8	43.535	606830	0	NaN	52364	0.39	-	-1		0	97	817.394399875593	1632.77424681798	2	MULTI	HCD	FTMS	0	0	0	-1	0	0	0	0	4				NaN	1	NaN	NaN	NaN	NaN	1409	0	1	2552	3959
20140904-PurClathDigest-1ug-01	3964	35.803	43.95	538940	0	NaN	32755	0.39	-	-1		0	116	1098.53222673573	2195.04990053825	2	MULTI	HCD	FTMS	0	0	0	-1	0	0	0	0	5				NaN	1	NaN	NaN	NaN	NaN	1410	0	1	2552	3959
20140904-PurClathDigest-1ug-01	3965	35.807	89.151	509370	0	NaN	55686	0.43	+	4204	TEYLSNADER	10	109	599.273064038915	1196.53157514463	2	MULTI	HCD	FTMS	0	0	0	-1	0	0	0	0	6	Unmodified	_TEYLSNADER_	E1BDX8	155.623901367188	1	NaN	NaN	NaN	NaN	1411	0	1	2552	3959
20140904-PurClathDigest-1ug-01	3966	35.811	70.593	434230	0	NaN	35358	0.42	+	1943	KEDIAINGEVEGKEEEQETK	20	135	759.035873723363	2274.08579177029	3	MULTI	HCD	FTMS	0	0	0	-1	0	0	0	0	7	Unmodified	_KEDIAINGEVEGKEEEQETK_	F1MDZ2;O77788	181.031402587891	1	NaN	NaN	NaN	NaN	1412	0	1	2552	3959
20140904-PurClathDigest-1ug-01	3968	35.824	6.798	3292900	0	NaN	2017900	0.36	-	-1		0	63	530.603055233827	1588.78733630168	3	MULTI	HCD	FTMS	0	0	0	-1	0	0	0	0	1				NaN	1	NaN	NaN	NaN	NaN	1413	0	1	2553	3967
20140904-PurClathDigest-1ug-01	3969	35.827	5.935	7916200	0	NaN	741070	0.35	-	-1		0	141	488.479325147397	1949.88819472319	4	MULTI	HCD	FTMS	0	0	0	-1	0	0	0	0	2				NaN	1	NaN	NaN	NaN	NaN	1414	0	1	2553	3967
20140904-PurClathDigest-1ug-01	3970	35.83	17.161	78811	0	NaN	14150	0.36	-	-1		0	25	1110.57701445855	2219.13947598391	2	MULTI	HCD	FTMS	0	0	0	-1	0	0	0	0	3				NaN	1	NaN	NaN	NaN	NaN	1415	0	1	2553	3967
20140904-PurClathDigest-1ug-01	3971	35.833	30.611	892690	0	NaN	250560	0.38	-	-1		0	98	975.950643963559	1949.88673499392	2	MULTI	HCD	FTMS	0	0	0	-1	0	0	0	0	4				NaN	1	NaN	NaN	NaN	NaN	1416	0	1	2553	3967
20140904-PurClathDigest-1ug-01	3972	35.836	68.031	163250	0	NaN	14342	0.42	+	2035	KFEEFQTDMAAHEER	15	82	942.414560164346	1882.81456739549	2	MULTI	HCD	FTMS	0	0	0	-1	0	0	0	0	5	Oxidation (M)	_KFEEFQTDM(ox)AAHEER_	E1BFB0	80.7241134643555	1	NaN	NaN	NaN	NaN	1417	0	1	2553	3967
20140904-PurClathDigest-1ug-01	3973	35.84	74.458	638380	0	NaN	109870	0.42	+	2944	LTQEPESIR	9	105	536.784898277178	1071.55524362116	2	MULTI	HCD	FTMS	0	0	0	-1	0	0	0	0	6	Unmodified	_LTQEPESIR_	G3N252;P04975	124.043098449707	1	NaN	NaN	NaN	NaN	1418	0	1	2553	3967
20140904-PurClathDigest-1ug-01	3974	35.844	59.084	103600	0	NaN	15027	0.41	-	-1		0	50	791.736017806061	2372.18622401838	3	MULTI	HCD	FTMS	0	0	0	-1	0	0	0	0	7				NaN	1	NaN	NaN	NaN	NaN	1419	0	1	2553	3967
20140904-PurClathDigest-1ug-01	3976	35.856	0.507	76389000	0	NaN	14202000	0.36	+	4477	VDKLDASESLR	11	91	616.827114476943	1231.63967602069	2	MULTI	HCD	FTMS	0	0	0	-1	0	0	0	0	1	Unmodified	_VDKLDASESLR_	P49951;F1MPU0	130.355895996094	1	NaN	NaN	NaN	NaN	1420	0	1	2554	3975
20140904-PurClathDigest-1ug-01	3977	35.859	0.472	72600000	0	NaN	6245500	0.35	+	4486	VDKLDASESLR	11	97	411.554129254164	1231.64055836269	3	MULTI	HCD	FTMS	0	0	0	-1	0	0	0	0	2	Unmodified	_VDKLDASESLR_	P49951;F1MPU0	133.57080078125	1	NaN	NaN	NaN	NaN	1421	0	1	2554	3975
20140904-PurClathDigest-1ug-01	3978	35.862	15.165	2613100	0	NaN	159970	0.36	+	3591	RPISADSAIMNPASK	15	130	787.402947251382	1572.79134156956	2	MULTI	HCD	FTMS	0	0	0	-1	0	0	0	0	3	Oxidation (M)	_RPISADSAIM(ox)NPASK_	P49951;F1MPU0	108.831199645996	1	NaN	NaN	NaN	NaN	1422	0	1	2554	3975
20140904-PurClathDigest-1ug-01	3979	35.865	27.375	1091100	0	NaN	150820	0.37	+	4469	VDHGAEIITQSPGR	14	92	740.381423101929	1478.74829327066	2	MULTI	HCD	FTMS	0	0	0	-1	0	0	0	0	4	Unmodified	_VDHGAEIITQSPGR_	F1MEW3	159.344802856445	1	NaN	NaN	NaN	NaN	1423	0	1	2554	3975
20140904-PurClathDigest-1ug-01	3980	35.868	27.273	3540700	0	NaN	777560	0.37	-	-1		0	75	323.182019278516	644.349485623831	2	MULTI	HCD	FTMS	0	0	0	-1	0	0	0	0	5				NaN	1	NaN	NaN	NaN	NaN	1424	0	1	2554	3975
20140904-PurClathDigest-1ug-01	3981	35.871	60.497	345210	0	NaN	59328	0.41	-	-1		0	107	714.997579435266	2141.970908906	3	MULTI	HCD	FTMS	0	0	0	-1	0	0	0	0	6				NaN	1	NaN	NaN	NaN	NaN	1425	0	1	2554	3975
20140904-PurClathDigest-1ug-01	3982	35.875	73.506	1043300	0	NaN	142080	0.42	+	4758	VQAVVAVAR	9	125	456.785066107481	911.555579281761	2	MULTI	HCD	FTMS	0	0	0	-1	0	0	0	0	7	Unmodified	_VQAVVAVAR_	F1MYC9	117.66480255127	1	NaN	NaN	NaN	NaN	1426	0	1	2554	3975
20140904-PurClathDigest-1ug-01	3984	35.888	7.318	2839400	0	NaN	288430	0.35	+	1023	EVDEQMLNVQNK	12	102	731.845720708021	1461.67688848284	2	MULTI	HCD	FTMS	0	0	0	-1	0	0	0	0	1	Oxidation (M)	_EVDEQM(ox)LNVQNK_	Q2KJD0;Q3MHM5;Q6B856;E1B953;E1BJB1	122.73560333252	1	NaN	NaN	NaN	NaN	1427	0	1	2555	3983
20140904-PurClathDigest-1ug-01	3985	35.891	22.976	512560	0	NaN	34417	0.37	+	3598	RPISADSAIMNPASK	15	87	525.271299002351	1572.79206760725	3	MULTI	HCD	FTMS	0	0	0	-1	0	0	0	0	2	Oxidation (M)	_RPISADSAIM(ox)NPASK_	P49951;F1MPU0	79.9947280883789	1	NaN	NaN	NaN	NaN	1428	0	1	2555	3983
20140904-PurClathDigest-1ug-01	3986	35.894	37.385	890570	0	NaN	195610	0.38	+	711	DYQELMNTK	9	102	579.26099313372	1156.50743333424	2	MULTI	HCD	FTMS	0	0	0	-1	0	0	0	0	3	Oxidation (M)	_DYQELM(ox)NTK_	G3N0V2;CON__ENSEMBL:ENSBTAP00000038253;CON__P04264;CON__Q3TTY5	98.9797210693359	1	NaN	NaN	NaN	NaN	1429	0	1	2555	3983
20140904-PurClathDigest-1ug-01	3987	35.897	17.783	3028900	0	NaN	527220	0.36	-	-1		0	152	506.262794934859	1010.51103693652	2	MULTI	HCD	FTMS	0	0	0	-1	0	0	0	0	4				NaN	1	NaN	NaN	NaN	NaN	1430	0	1	2555	3983
20140904-PurClathDigest-1ug-01	3988	35.9	75.594	195170	0	NaN	20457	0.42	-	-1		0	110	683.767533840108	1365.52051474702	2	MULTI	HCD	FTMS	0	0	0	-1	0	0	0	0	5				NaN	1	NaN	NaN	NaN	NaN	1431	0	1	2555	3983
20140904-PurClathDigest-1ug-01	3989	35.904	63.804	16847	0	NaN	4717.4	0.41	-	-1		0	11	1151.26744680412	3450.78051101257	3	MULTI	HCD	FTMS	0	0	0	-1	0	0	0	0	6				NaN	1	NaN	NaN	NaN	NaN	1432	0	1	2555	3983
20140904-PurClathDigest-1ug-01	3990	35.908	70.004	14014	0	NaN	2595.1	0.42	-	-1		0	17	1069.8867369362	3206.6383814088	3	MULTI	HCD	FTMS	0	0	0	-1	0	0	0	0	7				NaN	1	NaN	NaN	NaN	NaN	1433	0	1	2555	3983
20140904-PurClathDigest-1ug-01	3992	35.921	4.869	671990	0	NaN	106270	0.33	-	-1		0	25	567.293454935572	1132.57235693794	2	MULTI	HCD	FTMS	0	0	0	-1	0	0	0	0	1				NaN	1	NaN	NaN	NaN	NaN	1434	0	1	2556	3991
20140904-PurClathDigest-1ug-01	3993	35.924	33.737	813160	0	NaN	183610	0.38	-	-1		0	103	1011.51613192518	2021.01771091717	2	MULTI	HCD	FTMS	0	0	0	-1	0	0	0	0	2				NaN	1	NaN	NaN	NaN	NaN	1435	0	1	2556	3991
20140904-PurClathDigest-1ug-01	3994	35.927	30.747	33949	0	NaN	6208.2	0.38	-	-1		0	19	1317.67178431063	3949.99352353209	3	MULTI	HCD	FTMS	0	0	0	-1	0	0	0	0	3				NaN	1	NaN	NaN	NaN	NaN	1436	0	1	2556	3991
20140904-PurClathDigest-1ug-01	3995	35.93	37.106	115180	0	NaN	6266.3	0.39	-	-1		0	56	669.315011003617	2673.23093814807	4	MULTI	HCD	FTMS	0	0	0	-1	0	0	0	0	4				NaN	1	NaN	NaN	NaN	NaN	1437	0	1	2556	3991
20140904-PurClathDigest-1ug-01	3996	35.934	36.976	908360	0	NaN	118280	0.38	-	-1		0	116	536.4996555091	2141.96951617	4	MULTI	HCD	FTMS	0	0	0	-1	0	0	0	0	5				NaN	1	NaN	NaN	NaN	NaN	1438	0	1	2556	3991
20140904-PurClathDigest-1ug-01	3997	35.937	56.393	478630	0	NaN	27301	0.41	-	-1		0	127	634.058656760046	NaN	0	PEAK	HCD	FTMS	0	0	0	-1	0	0	0	0	6				NaN	1	NaN	NaN	NaN	NaN	1439	0	1	2556	3991
20140904-PurClathDigest-1ug-01	3998	35.941	94.447	642840	0	NaN	108160	0.44	+	1422	HGGGGGGFGGGGFGSR	16	118	660.794801865401	1319.5750507976	2	MULTI	HCD	FTMS	0	0	0	-1	0	0	0	0	7	Unmodified	_HGGGGGGFGGGGFGSR_	CON__P35908	222.31379699707	1	NaN	NaN	NaN	NaN	1440	0	1	2556	3991
20140904-PurClathDigest-1ug-01	4000	35.954	1.514	47412000	0	NaN	11430000	0.34	+	109	AGLLQR	6	69	329.205669831932	656.396786730665	2	MULTI	HCD	FTMS	0	0	0	-1	0	0	0	0	1	Unmodified	_AGLLQR_	P49951;F1MPU0	102.375801086426	1	NaN	NaN	NaN	NaN	1441	0	1	2557	3999
20140904-PurClathDigest-1ug-01	4001	35.957	3.923	5268700	0	NaN	1379200	0.35	-	-1		0	90	674.679106190299	2021.0154891711	3	MULTI	HCD	FTMS	0	0	0	-1	0	0	0	0	2				NaN	1	NaN	NaN	NaN	NaN	1442	0	1	2557	3999
20140904-PurClathDigest-1ug-01	4002	35.96	14.665	1463100	0	NaN	250570	0.36	-	-1		0	64	546.74394336755	1091.4733338019	2	MULTI	HCD	FTMS	0	0	0	-1	0	0	0	0	3				NaN	1	NaN	NaN	NaN	NaN	1443	0	1	2557	3999
20140904-PurClathDigest-1ug-01	4003	35.963	21.243	3217400	0	NaN	255300	0.37	+	44	AEEVAPKEELAAEAK	15	135	792.910342187218	1583.80613144124	2	MULTI	HCD	FTMS	0	0	0	-1	0	0	0	0	4	Unmodified	_AEEVAPKEELAAEAK_	F1MDZ2;O77788	130.607894897461	1	NaN	NaN	NaN	NaN	1444	0	1	2557	3999
20140904-PurClathDigest-1ug-01	4004	35.966	42.788	726050	0	NaN	58194	0.39	-	-1		0	87	465.766383970697	929.518215008194	2	MULTI	HCD	FTMS	0	0	0	-1	0	0	0	0	5				NaN	1	NaN	NaN	NaN	NaN	1445	0	1	2557	3999
20140904-PurClathDigest-1ug-01	4005	35.969	60.633	256740	0	NaN	59734	0.41	-	-1		0	77	710.279016018764	1418.54347910433	2	MULTI	HCD	FTMS	0	0	0	-1	0	0	0	0	6				NaN	1	NaN	NaN	NaN	NaN	1446	0	1	2557	3999
20140904-PurClathDigest-1ug-01	4006	35.973	71.124	316650	0	NaN	26020	0.42	-	-1		0	110	722.30984379732	1442.60513466144	2	MULTI	HCD	FTMS	0	0	0	-1	0	0	0	0	7				NaN	1	NaN	NaN	NaN	NaN	1447	0	1	2557	3999
20140904-PurClathDigest-1ug-01	4008	35.985	11.201	4994900	0	NaN	431610	0.38	-	-1		0	125	554.600609901481	1660.78000030464	3	MULTI	HCD	FTMS	0	0	0	-1	0	0	0	0	1				NaN	1	NaN	NaN	NaN	NaN	1448	0	1	2558	4007
20140904-PurClathDigest-1ug-01	4009	35.989	22.718	1068700	0	NaN	132560	0.37	+	923	ESKEETPGTEWEK	13	115	775.354547195339	1548.69454145748	2	MULTI	HCD	FTMS	0	0	0	-1	0	0	0	0	2	Unmodified	_ESKEETPGTEWEK_	G3N252;P04975	179.829895019531	1	NaN	NaN	NaN	NaN	1449	0	1	2558	4007
20140904-PurClathDigest-1ug-01	4010	35.992	34.912	46682	0	NaN	12374	0.38	-	-1		0	21	802.398231553988	1602.78191017478	2	MULTI	HCD	FTMS	0	0	0	-1	0	0	0	0	3				NaN	1	NaN	NaN	NaN	NaN	1450	0	1	2558	4007
20140904-PurClathDigest-1ug-01	4011	35.995	32.722	828370	0	NaN	147100	0.38	-	-1		0	147	639.277640031442	1914.81109069453	3	MULTI	HCD	FTMS	0	0	0	-1	0	0	0	0	4				NaN	1	NaN	NaN	NaN	NaN	1451	0	1	2558	4007
20140904-PurClathDigest-1ug-01	4012	35.999	50.029	2530100	0	NaN	512110	0.4	-	-1		0	113	486.243657841948	970.472762750696	2	MULTI	HCD	FTMS	0	0	0	-1	0	0	0	0	5				NaN	1	NaN	NaN	NaN	NaN	1452	0	1	2558	4007
20140904-PurClathDigest-1ug-01	4013	36.002	58.153	24850	0	NaN	5965.5	0.41	-	-1		0	24	924.471798915875	1846.92904489855	2	MULTI	HCD	FTMS	0	0	0	-1	0	0	0	0	6				NaN	1	NaN	NaN	NaN	NaN	1453	0	1	2558	4007
20140904-PurClathDigest-1ug-01	4014	36.006	43.232	84956	0	NaN	20552	0.39	-	-1		0	38	517.238817783171	1548.69462394971	3	MULTI	HCD	FTMS	0	0	0	-1	0	0	0	0	7				NaN	1	NaN	NaN	NaN	NaN	1454	0	1	2558	4007
20140904-PurClathDigest-1ug-01	4016	36.018	6.59	11162000	0	NaN	2524800	0.38	-	-1		0	92	446.239258783011	890.463964632823	2	MULTI	HCD	FTMS	0	0	0	-1	0	0	0	0	1				NaN	1	NaN	NaN	NaN	NaN	1455	0	1	2559	4015
20140904-PurClathDigest-1ug-01	4017	36.021	14.437	1569900	0	NaN	90185	0.36	-	-1		0	132	748.352251882386	2989.37990166314	4	MULTI	HCD	FTMS	0	0	0	-1	0	0	0	0	2				NaN	1	NaN	NaN	NaN	NaN	1456	0	1	2559	4015
20140904-PurClathDigest-1ug-01	4018	36.024	18.635	2159400	0	NaN	91206	0.37	+	654	DRGPDSGAETEEEKDTWEEK	20	161	769.999734803905	2306.97737501192	3	MULTI	HCD	FTMS	0	0	0	-1	0	0	0	0	3	Unmodified	_DRGPDSGAETEEEKDTWEEK_	F1N3M8;G3MYP5	196.725799560547	1	NaN	NaN	NaN	NaN	1457	0	1	2559	4015
20140904-PurClathDigest-1ug-01	4019	36.027	30.766	1038200	0	NaN	57236	0.38	-	-1		0	130	919.965358221758	1837.91616351032	2	MULTI	HCD	FTMS	0	0	0	-1	0	0	0	0	4				NaN	1	NaN	NaN	NaN	NaN	1458	0	1	2559	4015
20140904-PurClathDigest-1ug-01	4020	36.03	16.532	3365900	0	NaN	144950	0.37	-	-1		0	171	598.883523634951	2989.38123584176	5	MULTI	HCD	FTMS	0	0	0	-1	0	0	0	0	5				NaN	1	NaN	NaN	NaN	NaN	1459	0	1	2559	4015
20140904-PurClathDigest-1ug-01	4021	36.033	22.846	886900	0	NaN	52069	0.37	-	-1		0	109	650.969443772004	1949.88650191621	3	MULTI	HCD	FTMS	0	0	0	-1	0	0	0	0	6				NaN	1	NaN	NaN	NaN	NaN	1460	0	1	2559	4015
20140904-PurClathDigest-1ug-01	4022	36.037	38.139	981210	0	NaN	182990	0.39	+	2832	LQEELSQAER	10	105	601.802703118207	1201.59085330321	2	MULTI	HCD	FTMS	0	0	0	-1	0	0	0	0	7	Unmodified	_LQEELSQAER_	F1MIC9	173.973007202148	1	NaN	NaN	NaN	NaN	1461	0	1	2559	4015
20140904-PurClathDigest-1ug-01	4024	36.048	0.711	97617000	0	NaN	18210000	0.38	+	2491	LEALDANSR	9	83	494.756001194817	987.497449456434	2	MULTI	HCD	FTMS	0	0	0	-1	0	0	0	0	1	Unmodified	_LEALDANSR_	P04973	160.343902587891	1	NaN	NaN	NaN	NaN	1462	0	1	2560	4023
20140904-PurClathDigest-1ug-01	4025	36.052	3.204	9471400	0	NaN	978780	0.35	-	-1		0	107	795.400818648717	1588.78708436423	2	MULTI	HCD	FTMS	0	0	0	-1	0	0	0	0	2				NaN	1	NaN	NaN	NaN	NaN	1463	0	1	2560	4023
20140904-PurClathDigest-1ug-01	4026	36.054	3.879	10400000	0	NaN	1065500	0.35	-	-1		0	151	613.646451730187	1837.91752579076	3	MULTI	HCD	FTMS	0	0	0	-1	0	0	0	0	3				NaN	1	NaN	NaN	NaN	NaN	1464	0	1	2560	4023
20140904-PurClathDigest-1ug-01	4027	36.057	10.689	5063000	0	NaN	269290	0.36	-	-1		0	163	643.281504544271	1926.82268423301	3	MULTI	HCD	FTMS	0	0	0	-1	0	0	0	0	4				NaN	1	NaN	NaN	NaN	NaN	1465	0	1	2560	4023
20140904-PurClathDigest-1ug-01	4028	36.06	17.145	644100	0	NaN	32627	0.37	-	-1		0	102	997.467496069119	2989.38065880756	3	MULTI	HCD	FTMS	0	0	0	-1	0	0	0	0	5				NaN	1	NaN	NaN	NaN	NaN	1466	0	1	2560	4023
20140904-PurClathDigest-1ug-01	4029	36.063	15.374	1136800	0	NaN	212160	0.36	-	-1		0	106	460.486788660704	1837.91804877642	4	MULTI	HCD	FTMS	0	0	0	-1	0	0	0	0	6				NaN	1	NaN	NaN	NaN	NaN	1467	0	1	2560	4023
20140904-PurClathDigest-1ug-01	4030	36.066	15.108	4337800	0	NaN	233250	0.36	-	-1		0	185	634.310345503506	3166.51534518453	5	MULTI	HCD	FTMS	0	0	0	-1	0	0	0	0	7				NaN	1	NaN	NaN	NaN	NaN	1468	0	1	2560	4023
20140904-PurClathDigest-1ug-01	4032	36.078	5.336	900650	0	NaN	80228	0.37	-	-1		0	48	530.603055233827	1588.78733630168	3	MULTI	HCD	FTMS	0	0	0	-1	0	0	0	0	1				NaN	1	NaN	NaN	NaN	NaN	1469	0	1	2561	4031
20140904-PurClathDigest-1ug-01	4033	36.081	11.254	7439900	0	NaN	443810	0.36	+	903	EQLQGLNDR	9	148	536.772649389643	1071.53074584609	2	MULTI	HCD	FTMS	0	0	0	-1	0	0	0	0	2	Unmodified	_EQLQGLNDR_	F1MDZ2;Q08DH7	112.71549987793	1	NaN	NaN	NaN	NaN	1470	0	1	2561	4031
20140904-PurClathDigest-1ug-01	4034	36.084	9.869	859620	0	NaN	68435	0.36	-	-1		0	81	1056.51336528478	3166.51826645454	3	MULTI	HCD	FTMS	0	0	0	-1	0	0	0	0	3				NaN	1	NaN	NaN	NaN	NaN	1471	0	1	2561	4031
20140904-PurClathDigest-1ug-01	4035	36.087	11.47	1593900	0	NaN	175030	0.36	-	-1		0	94	702.327389891481	2103.96034027464	3	MULTI	HCD	FTMS	0	0	0	-1	0	0	0	0	4				NaN	1	NaN	NaN	NaN	NaN	1472	0	1	2561	4031
20140904-PurClathDigest-1ug-01	4036	36.09	19.022	4025900	0	NaN	851430	0.36	-	-1		0	73	342.213626268357	682.412699603514	2	MULTI	HCD	FTMS	0	0	0	-1	0	0	0	0	5				NaN	1	NaN	NaN	NaN	NaN	1473	0	1	2561	4031
20140904-PurClathDigest-1ug-01	4037	36.093	21.918	1127000	0	NaN	102430	0.37	-	-1		0	131	1052.98783746978	2103.96112200635	2	MULTI	HCD	FTMS	0	0	0	-1	0	0	0	0	6				NaN	1	NaN	NaN	NaN	NaN	1474	0	1	2561	4031
20140904-PurClathDigest-1ug-01	4038	36.096	19.785	1592100	0	NaN	187210	0.37	-	-1		0	132	570.956611407775	1709.84800482352	3	MULTI	HCD	FTMS	0	0	0	-1	0	0	0	0	7				NaN	1	NaN	NaN	NaN	NaN	1475	0	1	2561	4031
20140904-PurClathDigest-1ug-01	4040	36.108	1.851	24091000	0	NaN	2073200	0.36	+	4487	VDKLDASESLR	11	102	411.554129254164	1231.64055836269	3	MULTI	HCD	FTMS	0	0	0	-1	0	0	0	0	1	Unmodified	_VDKLDASESLR_	P49951;F1MPU0	107.141098022461	1	NaN	NaN	NaN	NaN	1476	0	1	2562	4039
20140904-PurClathDigest-1ug-01	4041	36.111	3.059	16695000	0	NaN	3169400	0.35	+	4478	VDKLDASESLR	11	102	616.827114476943	1231.63967602069	2	MULTI	HCD	FTMS	0	0	0	-1	0	0	0	0	2	Unmodified	_VDKLDASESLR_	P49951;F1MPU0	146.559097290039	1	NaN	NaN	NaN	NaN	1477	0	1	2562	4039
20140904-PurClathDigest-1ug-01	4042	36.113	13.628	1053400	0	NaN	517240	0.36	+	3004	MASPPPSGPPSATHTPFHQSPVEEK	25	77	658.064411061997	2628.22853838159	4	MULTI	HCD	FTMS	0	0	0	-1	0	0	0	0	3	Oxidation (M)	_M(ox)ASPPPSGPPSATHTPFHQSPVEEK_	F1N3M8;G3MYP5	75.942741394043	1	NaN	NaN	NaN	NaN	1478	0	1	2562	4039
20140904-PurClathDigest-1ug-01	4043	36.116	36.87	1612200	0	NaN	437420	0.39	+	838	EKGPEPTDEVLQQQGK	16	139	891.946763987552	1781.8789750419	2	MULTI	HCD	FTMS	0	0	0	-1	0	0	0	0	4	Unmodified	_EKGPEPTDEVLQQQGK_	F1N3M8;G3MYP5	152.508605957031	1	NaN	NaN	NaN	NaN	1479	0	1	2562	4039
20140904-PurClathDigest-1ug-01	4044	36.12	20.864	696210	0	NaN	33839	0.37	+	655	DRGPDSGAETEEEKDTWEEK	20	105	577.751989771394	2306.97885321918	4	MULTI	HCD	FTMS	0	0	0	-1	0	0	0	0	5	Unmodified	_DRGPDSGAETEEEKDTWEEK_	F1N3M8;G3MYP5	153.217102050781	1	NaN	NaN	NaN	NaN	1480	0	1	2562	4039
20140904-PurClathDigest-1ug-01	4045	36.123	40.464	589310	0	NaN	43489	0.39	-	-1		0	105	897.409172245311	1792.80379155742	2	MULTI	HCD	FTMS	0	0	0	-1	0	0	0	0	6				NaN	1	NaN	NaN	NaN	NaN	1481	0	1	2562	4039
20140904-PurClathDigest-1ug-01	4046	36.126	26.375	951660	0	NaN	94963	0.37	+	4753	VPQIEVETHK	10	88	393.883895606202	1178.62985741881	3	MULTI	HCD	FTMS	0	0	0	-1	0	0	0	0	7	Unmodified	_VPQIEVETHK_	E1BDX8	147.305801391602	1	NaN	NaN	NaN	NaN	1482	0	1	2562	4039
20140904-PurClathDigest-1ug-01	4048	36.138	1.827	5310400	0	NaN	422250	0.37	-	-1		0	72	792.636001054131	3166.51489835012	4	MULTI	HCD	FTMS	0	0	0	-1	0	0	0	0	1				NaN	1	NaN	NaN	NaN	NaN	1483	0	1	2563	4047
20140904-PurClathDigest-1ug-01	4049	36.141	10.431	1583900	0	NaN	231430	0.35	-	-1		0	48	330.195420021223	658.376287109247	2	MULTI	HCD	FTMS	0	0	0	-1	0	0	0	0	2				NaN	1	NaN	NaN	NaN	NaN	1484	0	1	2563	4047
20140904-PurClathDigest-1ug-01	4050	36.144	6.018	4462600	0	NaN	255830	0.34	-	-1		0	121	528.761481592492	3166.52523075535	6	MULTI	HCD	FTMS	0	0	0	-1	0	0	0	0	3				NaN	1	NaN	NaN	NaN	NaN	1485	0	1	2563	4047
20140904-PurClathDigest-1ug-01	4051	36.147	9.906	3150300	0	NaN	218900	0.36	+	840	EKGPEPTDEVLQQQGK	16	123	594.967513282743	1781.88071044843	3	MULTI	HCD	FTMS	0	0	0	-1	0	0	0	0	4	Unmodified	_EKGPEPTDEVLQQQGK_	F1N3M8;G3MYP5	113.70059967041	1	NaN	NaN	NaN	NaN	1486	0	1	2563	4047
20140904-PurClathDigest-1ug-01	4052	36.15	34.542	1356300	0	NaN	197320	0.39	+	2901	LSDDNTIGKEEIQQR	15	132	873.43967856441	1744.86480419562	2	MULTI	HCD	FTMS	0	0	0	-1	0	0	0	0	5	Unmodified	_LSDDNTIGKEEIQQR_	E1BFB0	236.978302001953	1	NaN	NaN	NaN	NaN	1487	0	1	2563	4047
20140904-PurClathDigest-1ug-01	4053	36.153	17.49	3901400	0	NaN	302680	0.36	-	-1		0	132	482.713546317295	1926.82507940278	4	MULTI	HCD	FTMS	0	0	0	-1	0	0	0	0	6				NaN	1	NaN	NaN	NaN	NaN	1488	0	1	2563	4047
20140904-PurClathDigest-1ug-01	4054	36.156	19.228	1936000	0	NaN	95612	0.37	-	-1		0	130	804.382499914621	1606.75044689604	2	MULTI	HCD	FTMS	0	0	0	-1	0	0	0	0	7				NaN	1	NaN	NaN	NaN	NaN	1489	0	1	2563	4047
20140904-PurClathDigest-1ug-01	4056	36.168	16.296	2712300	0	NaN	252100	0.38	+	1553	IAEAPASEAVAAPK	14	104	662.859041568979	1323.70353020476	2	MULTI	HCD	FTMS	0	0	0	-1	0	0	0	0	1	Unmodified	_IAEAPASEAVAAPK_	F1MEW3	124.991798400879	1	NaN	NaN	NaN	NaN	1490	0	1	2564	4055
20140904-PurClathDigest-1ug-01	4057	36.171	18.742	3512400	0	NaN	397700	0.37	+	2902	LSDDNTIGKEEIQQR	15	143	582.627255551969	1744.85993725611	3	MULTI	HCD	FTMS	0	0	0	-1	0	0	0	0	2	Unmodified	_LSDDNTIGKEEIQQR_	E1BFB0	165.508193969727	1	NaN	NaN	NaN	NaN	1491	0	1	2564	4055
20140904-PurClathDigest-1ug-01	4058	36.174	28.338	211010	0	NaN	19892	0.38	-	-1		0	49	567.293454935572	1132.57235693794	2	MULTI	HCD	FTMS	0	0	0	-1	0	0	0	0	3				NaN	1	NaN	NaN	NaN	NaN	1492	0	1	2564	4055
20140904-PurClathDigest-1ug-01	4059	36.177	38.681	1756600	0	NaN	332140	0.39	-	-1		0	119	606.75628639557	1211.49801985794	2	MULTI	HCD	FTMS	0	0	0	-1	0	0	0	0	4				NaN	1	NaN	NaN	NaN	NaN	1493	0	1	2564	4055
20140904-PurClathDigest-1ug-01	4060	36.181	38.364	728570	0	NaN	76646	0.38	+	1006	ETSLDISSK	9	96	490.251521611314	978.488490289429	2	MULTI	HCD	FTMS	0	0	0	-1	0	0	0	0	5	Unmodified	_ETSLDISSK_	F1N3M8;G3MYP5	83.7727966308594	1	NaN	NaN	NaN	NaN	1494	0	1	2564	4055
20140904-PurClathDigest-1ug-01	4061	36.184	42.304	1430500	0	NaN	85415	0.39	+	3592	RPISADSAIMNPASK	15	156	787.402947251382	1572.79134156956	2	MULTI	HCD	FTMS	0	0	0	-1	0	0	0	0	6	Oxidation (M)	_RPISADSAIM(ox)NPASK_	P49951;F1MPU0	96.60693359375	1	NaN	NaN	NaN	NaN	1495	0	1	2564	4055
20140904-PurClathDigest-1ug-01	4062	36.188	30.507	2578400	0	NaN	190610	0.38	-	-1		0	199	589.963744722852	1766.86940476876	3	MULTI	HCD	FTMS	0	0	0	-1	0	0	0	0	7				NaN	1	NaN	NaN	NaN	NaN	1496	0	1	2564	4055
20140904-PurClathDigest-1ug-01	4064	36.2	6.714	2464200	0	NaN	603740	0.36	-	-1		0	77	710.279016018764	1418.54347910433	2	MULTI	HCD	FTMS	0	0	0	-1	0	0	0	0	1				NaN	1	NaN	NaN	NaN	NaN	1497	0	1	2565	4063
20140904-PurClathDigest-1ug-01	4065	36.203	15.779	1873000	0	NaN	330760	0.36	-	-1		0	73	546.74394336755	1091.4733338019	2	MULTI	HCD	FTMS	0	0	0	-1	0	0	0	0	2				NaN	1	NaN	NaN	NaN	NaN	1498	0	1	2565	4063
20140904-PurClathDigest-1ug-01	4066	36.206	45.848	625630	0	NaN	53186	0.4	-	-1		0	112	922.941884208383	1843.86921548357	2	MULTI	HCD	FTMS	0	0	0	-1	0	0	0	0	3				NaN	1	NaN	NaN	NaN	NaN	1499	0	1	2565	4063
20140904-PurClathDigest-1ug-01	4067	36.209	57.319	690490	0	NaN	174160	0.41	-	-1		0	94	694.78530356815	NaN	0	PEAK	HCD	FTMS	0	0	0	-1	0	0	0	0	4				NaN	1	NaN	NaN	NaN	NaN	1500	0	1	2565	4063
20140904-PurClathDigest-1ug-01	4068	36.213	28.428	1616400	0	NaN	175700	0.37	-	-1		0	165	442.724794233823	1766.87007106889	4	MULTI	HCD	FTMS	0	0	0	-1	0	0	0	0	5				NaN	1	NaN	NaN	NaN	NaN	1501	0	1	2565	4063
20140904-PurClathDigest-1ug-01	4069	36.216	60.252	505220	0	NaN	41762	0.4	-	-1		0	90	465.766383970697	929.518215008194	2	MULTI	HCD	FTMS	0	0	0	-1	0	0	0	0	6				NaN	1	NaN	NaN	NaN	NaN	1502	0	1	2565	4063
20140904-PurClathDigest-1ug-01	4070	36.22	41.93	320890	0	NaN	30556	0.39	+	3005	MASPPPSGPPSATHTPFHQSPVEEK	25	91	877.083807911488	2628.22959433466	3	MULTI	HCD	FTMS	0	0	0	-1	0	0	0	0	7	Oxidation (M)	_M(ox)ASPPPSGPPSATHTPFHQSPVEEK_	F1N3M8;G3MYP5	92.6583480834961	1	NaN	NaN	NaN	NaN	1503	0	1	2565	4063
20140904-PurClathDigest-1ug-01	4072	36.232	10.516	3599700	0	NaN	309940	0.38	+	1198	GFSSGSAVVSGGSR	14	106	627.807177058726	1253.59980118425	2	MULTI	HCD	FTMS	0	0	0	-1	0	0	0	0	1	Unmodified	_GFSSGSAVVSGGSR_	CON__P35908;CON__Q3TTY5	148.722305297852	1	NaN	NaN	NaN	NaN	1504	0	1	2566	4071
20140904-PurClathDigest-1ug-01	4073	36.235	13.512	3520700	0	NaN	803520	0.35	+	110	AGLLQR	6	54	329.205669831932	656.396786730665	2	MULTI	HCD	FTMS	0	0	0	-1	0	0	0	0	2	Unmodified	_AGLLQR_	P49951;F1MPU0	102.375801086426	1	NaN	NaN	NaN	NaN	1505	0	1	2566	4071
20140904-PurClathDigest-1ug-01	4074	36.238	30.582	1958700	0	NaN	398110	0.37	+	2459	LDLAGR	6	57	322.689917417787	643.365281902374	2	MULTI	HCD	FTMS	0	0	0	-1	0	0	0	0	3	Unmodified	_LDLAGR_	F1MKC4;F1MRD0;P60712;Q3ZC07;Q5E9B5;P62739;P63258;P68138;G8JKX4	118.73819732666	1	NaN	NaN	NaN	NaN	1506	0	1	2566	4071
20140904-PurClathDigest-1ug-01	4075	36.242	36.582	1222900	0	NaN	61070	0.38	+	2099	KGDLQWNAGEK	11	129	623.314488682063	1244.61442443093	2	MULTI	HCD	FTMS	0	0	0	-1	0	0	0	0	4	Unmodified	_KGDLQWNAGEK_	F1MGT4	219.308197021484	1	NaN	NaN	NaN	NaN	1507	0	1	2566	4071
20140904-PurClathDigest-1ug-01	4076	36.245	47.589	712210	0	NaN	82777	0.4	+	924	ESKEETPGTEWEK	13	134	775.354547195339	1548.69454145748	2	MULTI	HCD	FTMS	0	0	0	-1	0	0	0	0	5	Unmodified	_ESKEETPGTEWEK_	G3N252;P04975	188.930694580078	1	NaN	NaN	NaN	NaN	1508	0	1	2566	4071
20140904-PurClathDigest-1ug-01	4077	36.248	30.274	2438500	0	NaN	252190	0.38	-	-1		0	164	503.91132290263	1508.71213930809	3	MULTI	HCD	FTMS	0	0	0	-1	0	0	0	0	6				NaN	1	NaN	NaN	NaN	NaN	1509	0	1	2566	4071
20140904-PurClathDigest-1ug-01	4078	36.252	17.972	239830	0	NaN	20865	0.36	-	-1		0	49	499.23733238209	2989.38033549294	6	MULTI	HCD	FTMS	0	0	0	-1	0	0	0	0	7				NaN	1	NaN	NaN	NaN	NaN	1510	0	1	2566	4071
20140904-PurClathDigest-1ug-01	4080	36.263	10.36	6309100	0	NaN	1406500	0.38	+	309	AMLSANIR	8	91	446.239258783011	890.463964632823	2	MULTI	HCD	FTMS	0	0	0	-1	0	0	0	0	1	Oxidation (M)	_AM(ox)LSANIR_	P49951;F1MPU0	97.1835021972656	1	NaN	NaN	NaN	NaN	1511	0	1	2567	4079
20140904-PurClathDigest-1ug-01	4081	36.267	10.762	1310900	0	NaN	92496	0.36	-	-1		0	106	748.352251882386	2989.37990166314	4	MULTI	HCD	FTMS	0	0	0	-1	0	0	0	0	2				NaN	1	NaN	NaN	NaN	NaN	1512	0	1	2567	4079
20140904-PurClathDigest-1ug-01	4082	36.27	12.776	1558200	0	NaN	85553	0.36	-	-1		0	102	598.883523634951	2989.38123584176	5	MULTI	HCD	FTMS	0	0	0	-1	0	0	0	0	3				NaN	1	NaN	NaN	NaN	NaN	1513	0	1	2567	4079
20140904-PurClathDigest-1ug-01	4083	36.273	18.981	2326100	0	NaN	278890	0.37	-	-1		0	131	786.363312424781	2356.06810787454	3	MULTI	HCD	FTMS	0	0	0	-1	0	0	0	0	4				NaN	1	NaN	NaN	NaN	NaN	1514	0	1	2567	4079
20140904-PurClathDigest-1ug-01	4084	36.276	38.492	1073300	0	NaN	115940	0.39	-	-1		0	162	755.362760736848	1508.7109685405	2	MULTI	HCD	FTMS	0	0	0	-1	0	0	0	0	5				NaN	1	NaN	NaN	NaN	NaN	1515	0	1	2567	4079
20140904-PurClathDigest-1ug-01	4085	36.279	28.587	1481600	0	NaN	104570	0.37	+	4451	VATHLSTPQGLR	12	107	427.242304232909	1278.70508329893	3	MULTI	HCD	FTMS	0	0	0	-1	0	0	0	0	6	Unmodified	_VATHLSTPQGLR_	E1BKN2	153.573699951172	1	NaN	NaN	NaN	NaN	1516	0	1	2567	4079
20140904-PurClathDigest-1ug-01	4086	36.282	49.688	1603700	0	NaN	191940	0.4	+	4716	VMEQEWR	7	107	497.226604780653	992.438656628106	2	MULTI	HCD	FTMS	0	0	0	-1	0	0	0	0	7	Oxidation (M)	_VM(ox)EQEWR_	G3N252;P04975	116.822700500488	1	NaN	NaN	NaN	NaN	1517	0	1	2567	4079
20140904-PurClathDigest-1ug-01	4088	36.294	9.034	8144300	0	NaN	1462600	0.37	+	2492	LEALDANSR	9	96	494.756001194817	987.497449456434	2	MULTI	HCD	FTMS	0	0	0	-1	0	0	0	0	1	Unmodified	_LEALDANSR_	P04973	207.847702026367	1	NaN	NaN	NaN	NaN	1518	0	1	2568	4087
20140904-PurClathDigest-1ug-01	4089	36.298	25.68	1591300	0	NaN	48810	0.37	+	1944	KEDIAINGEVEGKEEEQETK	20	170	759.362414411317	2275.06541383415	3	MULTI	HCD	FTMS	0	0	0	-1	0	0	0	0	2	Deamidation (NQ)	_KEDIAIN(de)GEVEGKEEEQETK_	F1MDZ2;O77788	147.611892700195	1	NaN	NaN	NaN	NaN	1519	0	1	2568	4087
20140904-PurClathDigest-1ug-01	4090	36.301	49.85	1707900	0	NaN	176740	0.39	-	-1		0	89	391.205915577148	780.397278221097	2	MULTI	HCD	FTMS	0	0	0	-1	0	0	0	0	3				NaN	1	NaN	NaN	NaN	NaN	1520	0	1	2568	4087
20140904-PurClathDigest-1ug-01	4091	36.304	38.492	531910	0	NaN	29571	0.38	-	-1		0	94	643.281504544271	1926.82268423301	3	MULTI	HCD	FTMS	0	0	0	-1	0	0	0	0	4				NaN	1	NaN	NaN	NaN	NaN	1521	0	1	2568	4087
20140904-PurClathDigest-1ug-01	4092	36.308	47.179	196120	0	NaN	15518	0.39	+	3599	RPISADSAIMNPASK	15	66	525.271299002351	1572.79206760725	3	MULTI	HCD	FTMS	0	0	0	-1	0	0	0	0	5	Oxidation (M)	_RPISADSAIM(ox)NPASK_	P49951;F1MPU0	70.7710876464844	1	NaN	NaN	NaN	NaN	1522	0	1	2568	4087
20140904-PurClathDigest-1ug-01	4093	36.311	83.32	309590	0	NaN	20449	0.43	-	-1		0	140	795.400818648717	1588.78708436423	2	MULTI	HCD	FTMS	0	0	0	-1	0	0	0	0	6				NaN	1	NaN	NaN	NaN	NaN	1523	0	1	2568	4087
20140904-PurClathDigest-1ug-01	4094	36.316	50.593	627690	0	NaN	339070	0.4	-	-1		0	66	415.878763695502	1244.61446168671	3	MULTI	HCD	FTMS	0	0	0	-1	0	0	0	0	7				NaN	1	NaN	NaN	NaN	NaN	1524	0	1	2568	4087
20140904-PurClathDigest-1ug-01	4096	36.327	27.642	2985100	0	NaN	491230	0.4	+	2418	LASVSADTDVAR	12	106	602.812325368611	1203.61009780402	2	MULTI	HCD	FTMS	0	0	0	-1	0	0	0	0	1	Unmodified	_LASVSADTDVAR_	F1MEW3	174.171493530273	1	NaN	NaN	NaN	NaN	1525	0	1	2569	4095
20140904-PurClathDigest-1ug-01	4097	36.331	22.936	2651400	0	NaN	133370	0.37	+	1866	KASDKLDTVLEK	12	140	449.589162147393	1345.74565704238	3	MULTI	HCD	FTMS	0	0	0	-1	0	0	0	0	2	Unmodified	_KASDKLDTVLEK_	F1MEW3	123.263000488281	1	NaN	NaN	NaN	NaN	1526	0	1	2569	4095
20140904-PurClathDigest-1ug-01	4098	36.334	36.071	2179800	0	NaN	218330	0.38	+	4828	VTMQNLNDR	9	113	545.769133719525	1089.52371450585	2	MULTI	HCD	FTMS	0	0	0	-1	0	0	0	0	3	Unmodified	_VTMQNLNDR_	CON__A2A4G1;CON__P02533;CON__Q3ZAW8;CON__Q7Z3Y8;CON__Q9Z2K1;Q0P5J4;CON__P08779;CON__Q7Z3Y7;CON__Q7Z3Z0;F1MC11;CON__P02535-1;CON__P13645;CON__Q148H6;CON__Q7Z3Y9;Q0P5J6;Q148H6	170.267593383789	1	NaN	NaN	NaN	NaN	1527	0	1	2569	4095
20140904-PurClathDigest-1ug-01	4099	36.338	21.917	1052700	0	NaN	103710	0.37	-	-1		0	111	634.310345503506	3166.51534518453	5	MULTI	HCD	FTMS	0	0	0	-1	0	0	0	0	4				NaN	1	NaN	NaN	NaN	NaN	1528	0	1	2569	4095
20140904-PurClathDigest-1ug-01	4100	36.341	46.633	1871200	0	NaN	259570	0.4	+	1867	KASDKLDTVLEK	12	153	673.880052679064	1345.74555242493	2	MULTI	HCD	FTMS	0	0	0	-1	0	0	0	0	5	Unmodified	_KASDKLDTVLEK_	F1MEW3	173.738403320313	1	NaN	NaN	NaN	NaN	1529	0	1	2569	4095
20140904-PurClathDigest-1ug-01	4101	36.344	40.739	2690800	0	NaN	223650	0.38	+	2732	LLEAQSHFR	9	117	367.533195015369	1099.57775564631	3	MULTI	HCD	FTMS	0	0	0	-1	0	0	0	0	6	Unmodified	_LLEAQSHFR_	E1BFB0	135.573104858398	1	NaN	NaN	NaN	NaN	1530	0	1	2569	4095
20140904-PurClathDigest-1ug-01	4102	36.348	64.457	1019500	0	NaN	109490	0.41	-	-1		0	147	619.301936491337	1236.58932004947	2	MULTI	HCD	FTMS	0	0	0	-1	0	0	0	0	7				NaN	1	NaN	NaN	NaN	NaN	1531	0	1	2569	4095
20140904-PurClathDigest-1ug-01	4104	36.36	3.689	10289000	0	NaN	880410	0.38	+	4488	VDKLDASESLR	11	108	411.554129254164	1231.64055836269	3	MULTI	HCD	FTMS	0	0	0	-1	0	0	0	0	1	Unmodified	_VDKLDASESLR_	P49951;F1MPU0	142.540802001953	1	NaN	NaN	NaN	NaN	1532	0	1	2570	4103
20140904-PurClathDigest-1ug-01	4105	36.363	6.01	9721700	0	NaN	1626400	0.35	+	4479	VDKLDASESLR	11	117	616.827114476943	1231.63967602069	2	MULTI	HCD	FTMS	0	0	0	-1	0	0	0	0	2	Unmodified	_VDKLDASESLR_	P49951;F1MPU0	141.998092651367	1	NaN	NaN	NaN	NaN	1533	0	1	2570	4103
20140904-PurClathDigest-1ug-01	4106	36.366	15.084	4505500	0	NaN	437190	0.36	-	-1		0	101	465.909256906194	1394.70594131878	3	MULTI	HCD	FTMS	0	0	0	-1	0	0	0	0	3				NaN	1	NaN	NaN	NaN	NaN	1534	0	1	2570	4103
20140904-PurClathDigest-1ug-01	4107	36.369	26.419	2976200	0	NaN	428470	0.37	+	4452	VATHLSTPQGLR	12	128	640.35940826124	1278.70426358928	2	MULTI	HCD	FTMS	0	0	0	-1	0	0	0	0	4	Unmodified	_VATHLSTPQGLR_	E1BKN2	160.272705078125	1	NaN	NaN	NaN	NaN	1535	0	1	2570	4103
20140904-PurClathDigest-1ug-01	4108	36.372	38.768	691240	0	NaN	193300	0.39	+	839	EKGPEPTDEVLQQQGK	16	106	891.946763987552	1781.8789750419	2	MULTI	HCD	FTMS	0	0	0	-1	0	0	0	0	5	Unmodified	_EKGPEPTDEVLQQQGK_	F1N3M8;G3MYP5	124.422996520996	1	NaN	NaN	NaN	NaN	1536	0	1	2570	4103
20140904-PurClathDigest-1ug-01	4109	36.376	42.407	164140	0	NaN	14293	0.39	-	-1		0	63	705.829709314367	1409.64486569553	2	MULTI	HCD	FTMS	0	0	0	-1	0	0	0	0	6				NaN	1	NaN	NaN	NaN	NaN	1537	0	1	2570	4103
20140904-PurClathDigest-1ug-01	4110	36.379	29.64	1807900	0	NaN	215750	0.38	-	-1		0	141	529.590171589871	1585.74868536981	3	MULTI	HCD	FTMS	0	0	0	-1	0	0	0	0	7				NaN	1	NaN	NaN	NaN	NaN	1538	0	1	2570	4103
20140904-PurClathDigest-1ug-01	4112	36.391	7.949	1313100	0	NaN	215180	0.39	-	-1		0	74	378.185068793168	1508.71116930627	4	MULTI	HCD	FTMS	0	0	0	-1	0	0	0	0	1				NaN	1	NaN	NaN	NaN	NaN	1539	0	1	2571	4111
20140904-PurClathDigest-1ug-01	4113	36.394	22.015	3732100	0	NaN	425640	0.37	-	-1		0	119	538.792275420154	1075.56999790711	2	MULTI	HCD	FTMS	0	0	0	-1	0	0	0	0	2				NaN	1	NaN	NaN	NaN	NaN	1540	0	1	2571	4111
20140904-PurClathDigest-1ug-01	4114	36.397	31.118	3463900	0	NaN	612770	0.37	-	-1		0	107	463.219132975965	924.42371301873	2	MULTI	HCD	FTMS	0	0	0	-1	0	0	0	0	3				NaN	1	NaN	NaN	NaN	NaN	1541	0	1	2571	4111
20140904-PurClathDigest-1ug-01	4115	36.4	40.131	729910	0	NaN	84996	0.39	-	-1		0	95	681.841833249937	1361.66911356667	2	MULTI	HCD	FTMS	0	0	0	-1	0	0	0	0	4				NaN	1	NaN	NaN	NaN	NaN	1542	0	1	2571	4111
20140904-PurClathDigest-1ug-01	4116	36.404	16.799	990810	0	NaN	117580	0.36	-	-1		0	90	590.02428815313	2356.06804674612	4	MULTI	HCD	FTMS	0	0	0	-1	0	0	0	0	5				NaN	1	NaN	NaN	NaN	NaN	1543	0	1	2571	4111
20140904-PurClathDigest-1ug-01	4117	36.407	29.877	518820	0	NaN	37691	0.38	+	3371	QEYDESGPSIVHR	13	95	506.239328307191	1515.69615552177	3	MULTI	HCD	FTMS	0	0	0	-1	0	0	0	0	6	Unmodified	_QEYDESGPSIVHR_	F1MRD0;P60712;P63258	85.1736297607422	1	NaN	NaN	NaN	NaN	1544	0	1	2571	4111
20140904-PurClathDigest-1ug-01	4118	36.41	39.685	8211400	0	NaN	966360	0.39	+	1827	IYIDSNNNPER	11	158	667.820084169558	1333.62561540592	2	MULTI	HCD	FTMS	0	0	0	-1	0	0	0	0	7	Unmodified	_IYIDSNNNPER_	P49951;F1MPU0	193.77490234375	1	NaN	NaN	NaN	NaN	1545	0	1	2571	4111
20140904-PurClathDigest-1ug-01	4120	36.422	17.4	2461100	0	NaN	273600	0.41	+	2687	LHISQLQHENSTLK	14	145	549.965725791988	1646.87534797617	3	MULTI	HCD	FTMS	0	0	0	-1	0	0	0	0	1	Unmodified	_LHISQLQHENSTLK_	F1MIC9	129.398193359375	1	NaN	NaN	NaN	NaN	1546	0	1	2572	4119
20140904-PurClathDigest-1ug-01	4121	36.426	30.851	1330500	0	NaN	266200	0.38	-	-1		0	109	606.75628639557	1211.49801985794	2	MULTI	HCD	FTMS	0	0	0	-1	0	0	0	0	2				NaN	1	NaN	NaN	NaN	NaN	1547	0	1	2572	4119
20140904-PurClathDigest-1ug-01	4122	36.429	31.252	3989100	0	NaN	282800	0.38	+	1381	HDEYLEVTK	9	141	567.278331205561	1132.54210947792	2	MULTI	HCD	FTMS	0	0	0	-1	0	0	0	0	3	Unmodified	_HDEYLEVTK_	G3MYP5	203.559692382813	1	NaN	NaN	NaN	NaN	1548	0	1	2572	4119
20140904-PurClathDigest-1ug-01	4123	36.432	22.958	1634100	0	NaN	102880	0.37	-	-1		0	150	620.302378016064	1857.88530464839	3	MULTI	HCD	FTMS	0	0	0	-1	0	0	0	0	4				NaN	1	NaN	NaN	NaN	NaN	1549	0	1	2572	4119
20140904-PurClathDigest-1ug-01	4124	36.435	22.844	2345000	0	NaN	425740	0.37	-	-1		0	85	347.189632255844	1038.54706736773	3	MULTI	HCD	FTMS	0	0	0	-1	0	0	0	0	5				NaN	1	NaN	NaN	NaN	NaN	1550	0	1	2572	4119
20140904-PurClathDigest-1ug-01	4125	36.438	30.168	1915900	0	NaN	150470	0.38	-	-1		0	170	552.64628116418	1654.91701409274	3	MULTI	HCD	FTMS	0	0	0	-1	0	0	0	0	6				NaN	1	NaN	NaN	NaN	NaN	1551	0	1	2572	4119
20140904-PurClathDigest-1ug-01	4126	36.442	49.953	291960	0	NaN	24268	0.4	-	-1		0	84	804.382499914621	1606.75044689604	2	MULTI	HCD	FTMS	0	0	0	-1	0	0	0	0	7				NaN	1	NaN	NaN	NaN	NaN	1552	0	1	2572	4119
20140904-PurClathDigest-1ug-01	4128	36.453	7.369	13801000	0	NaN	3026600	0.4	+	2498	LEALDANSR	9	105	495.248259420448	988.481965907697	2	MULTI	HCD	FTMS	0	0	0	-1	0	0	0	0	1	Deamidation (NQ)	_LEALDAN(de)SR_	P04973	169.895599365234	1	NaN	NaN	NaN	NaN	1553	0	1	2573	4127
20140904-PurClathDigest-1ug-01	4129	36.457	6.624	5495700	0	NaN	474190	0.35	+	2562	LEKHELIEFRR	11	92	368.21093388918	1468.81462969032	4	MULTI	HCD	FTMS	0	0	0	-1	0	0	0	0	2	Unmodified	_LEKHELIEFRR_	P49951;F1MPU0	106.045303344727	1	NaN	NaN	NaN	NaN	1554	0	1	2573	4127
20140904-PurClathDigest-1ug-01	4130	36.46	14.436	4195000	0	NaN	617440	0.36	+	361	AQLQDLNDR	9	109	537.264048972812	1072.51354501242	2	MULTI	HCD	FTMS	0	0	0	-1	0	0	0	0	3	Deamidation (NQ)	_AQLQDLN(de)DR_	P02548	151.816192626953	1	NaN	NaN	NaN	NaN	1555	0	1	2573	4127
20140904-PurClathDigest-1ug-01	4131	36.463	26.748	925400	0	NaN	107200	0.38	-	-1		0	118	793.882569460307	1585.75058598741	2	MULTI	HCD	FTMS	0	0	0	-1	0	0	0	0	4				NaN	1	NaN	NaN	NaN	NaN	1556	0	1	2573	4127
20140904-PurClathDigest-1ug-01	4132	36.466	18.42	8613800	0	NaN	734350	0.36	+	2563	LEKHELIEFRR	11	163	490.61228468758	1468.81502466294	3	MULTI	HCD	FTMS	0	0	0	-1	0	0	0	0	5	Unmodified	_LEKHELIEFRR_	P49951;F1MPU0	118.300498962402	1	NaN	NaN	NaN	NaN	1557	0	1	2573	4127
20140904-PurClathDigest-1ug-01	4133	36.469	33.867	665570	0	NaN	84709	0.38	-	-1		0	104	929.949425931447	1857.88429892969	2	MULTI	HCD	FTMS	0	0	0	-1	0	0	0	0	6				NaN	1	NaN	NaN	NaN	NaN	1558	0	1	2573	4127
20140904-PurClathDigest-1ug-01	4134	36.473	32.565	1115900	0	NaN	229770	0.38	-	-1		0	83	586.790028994202	1171.5655050552	2	MULTI	HCD	FTMS	0	0	0	-1	0	0	0	0	7				NaN	1	NaN	NaN	NaN	NaN	1559	0	1	2573	4127
20140904-PurClathDigest-1ug-01	4136	36.484	4.562	313660	0	NaN	51218	0.39	-	-1		0	26	890.091354164591	2667.25223309397	3	MULTI	HCD	FTMS	0	0	0	-1	0	0	0	0	1				NaN	1	NaN	NaN	NaN	NaN	1560	0	1	2574	4135
20140904-PurClathDigest-1ug-01	4137	36.487	24.757	1196800	0	NaN	138240	0.37	-	-1		0	144	750.326324287397	1498.63809564159	2	MULTI	HCD	FTMS	0	0	0	-1	0	0	0	0	2				NaN	1	NaN	NaN	NaN	NaN	1561	0	1	2574	4135
20140904-PurClathDigest-1ug-01	4138	36.491	20.369	81980	0	NaN	8477.1	0.37	-	-1		0	29	1162.06182036381	2322.10908779441	2	MULTI	HCD	FTMS	0	0	0	-1	0	0	0	0	3				NaN	1	NaN	NaN	NaN	NaN	1562	0	1	2574	4135
20140904-PurClathDigest-1ug-01	4139	36.494	30.958	1595200	0	NaN	267730	0.37	+	2877	LQSVLGK	7	70	372.734165643377	743.453778353553	2	MULTI	HCD	FTMS	0	0	0	-1	0	0	0	0	4	Unmodified	_LQSVLGK_	Q3ZCF0	119.263900756836	1	NaN	NaN	NaN	NaN	1563	0	1	2574	4135
20140904-PurClathDigest-1ug-01	4140	36.497	33.777	2342900	0	NaN	553940	0.38	+	111	AGLLQR	6	75	329.205669831932	656.396786730665	2	MULTI	HCD	FTMS	0	0	0	-1	0	0	0	0	5	Unmodified	_AGLLQR_	P49951;F1MPU0	102.375801086426	1	NaN	NaN	NaN	NaN	1564	0	1	2574	4135
20140904-PurClathDigest-1ug-01	4141	36.5	23.757	483940	0	NaN	65086	0.36	-	-1		0	78	503.91132290263	1508.71213930809	3	MULTI	HCD	FTMS	0	0	0	-1	0	0	0	0	6				NaN	1	NaN	NaN	NaN	NaN	1565	0	1	2574	4135
20140904-PurClathDigest-1ug-01	4142	36.503	28.01	1410000	0	NaN	140460	0.38	-	-1		0	138	610.555073852312	2438.19118954285	4	MULTI	HCD	FTMS	0	0	0	-1	0	0	0	0	7				NaN	1	NaN	NaN	NaN	NaN	1566	0	1	2574	4135
20140904-PurClathDigest-1ug-01	4144	36.515	25.757	2179000	0	NaN	487990	0.42	+	310	AMLSANIR	8	92	446.239258783011	890.463964632823	2	MULTI	HCD	FTMS	0	0	0	-1	0	0	0	0	1	Oxidation (M)	_AM(ox)LSANIR_	P49951;F1MPU0	97.1835021972656	1	NaN	NaN	NaN	NaN	1567	0	1	2575	4143
20140904-PurClathDigest-1ug-01	4145	36.519	41.109	1667500	0	NaN	246030	0.39	+	3866	SLLEGEGSSGGGGR	14	103	631.802725520252	1261.5908981073	2	MULTI	HCD	FTMS	0	0	0	-1	0	0	0	0	2	Unmodified	_SLLEGEGSSGGGGR_	CON__P13645	160.771194458008	1	NaN	NaN	NaN	NaN	1568	0	1	2575	4143
20140904-PurClathDigest-1ug-01	4146	36.522	36.191	1589900	0	NaN	370910	0.37	-	-1		0	51	311.189566047146	620.364579161092	2	MULTI	HCD	FTMS	0	0	0	-1	0	0	0	0	3				NaN	1	NaN	NaN	NaN	NaN	1569	0	1	2575	4143
20140904-PurClathDigest-1ug-01	4147	36.525	27.646	41266	0	NaN	3034.9	0.37	-	-1		0	23	1248.34976055632	4989.3699363589	4	MULTI	HCD	FTMS	0	0	0	-1	0	0	0	0	4				NaN	1	NaN	NaN	NaN	NaN	1570	0	1	2575	4143
20140904-PurClathDigest-1ug-01	4148	36.529	50.209	1244200	0	NaN	204510	0.4	+	1454	HLLPVETQR	9	110	546.81097932957	1091.60740572594	2	MULTI	HCD	FTMS	0	0	0	-1	0	0	0	0	5	Unmodified	_HLLPVETQR_	E1BDX8	132.158996582031	1	NaN	NaN	NaN	NaN	1571	0	1	2575	4143
20140904-PurClathDigest-1ug-01	4149	36.532	39.545	146480	0	NaN	64418	0.39	-	-1		0	38	1001.22715702887	4000.87952224909	4	MULTI	HCD	FTMS	0	0	0	-1	0	0	0	0	6				NaN	1	NaN	NaN	NaN	NaN	1572	0	1	2575	4143
20140904-PurClathDigest-1ug-01	4150	36.536	60.799	581960	0	NaN	41381	0.41	+	3593	RPISADSAIMNPASK	15	129	787.402947251382	1572.79134156956	2	MULTI	HCD	FTMS	0	0	0	-1	0	0	0	0	7	Oxidation (M)	_RPISADSAIM(ox)NPASK_	P49951;F1MPU0	99.6394271850586	1	NaN	NaN	NaN	NaN	1573	0	1	2575	4143
20140904-PurClathDigest-1ug-01	4152	36.548	11.342	4328000	0	NaN	983230	0.39	+	5048	YLQMAR	6	77	391.205915577148	780.397278221097	2	MULTI	HCD	FTMS	0	0	0	-1	0	0	0	0	1	Unmodified	_YLQMAR_	P49951;F1MPU0	123.872901916504	1	NaN	NaN	NaN	NaN	1574	0	1	2576	4151
20140904-PurClathDigest-1ug-01	4153	36.551	26.943	600080	0	NaN	113370	0.37	-	-1		0	101	605.97498137401	1814.90311472223	3	MULTI	HCD	FTMS	0	0	0	-1	0	0	0	0	2				NaN	1	NaN	NaN	NaN	NaN	1575	0	1	2576	4151
20140904-PurClathDigest-1ug-01	4154	36.554	25.323	1532500	0	NaN	415610	0.37	-	-1		0	129	474.436426584388	2367.14575058894	5	MULTI	HCD	FTMS	0	0	0	-1	0	0	0	0	3				NaN	1	NaN	NaN	NaN	NaN	1576	0	1	2576	4151
20140904-PurClathDigest-1ug-01	4155	36.558	33.383	1272000	0	NaN	189600	0.38	-	-1		0	145	710.640713289783	2128.90031046955	3	MULTI	HCD	FTMS	0	0	0	-1	0	0	0	0	4				NaN	1	NaN	NaN	NaN	NaN	1577	0	1	2576	4151
20140904-PurClathDigest-1ug-01	4156	36.561	49.636	1122600	0	NaN	155910	0.39	-	-1		0	106	387.211053913668	772.407554894136	2	MULTI	HCD	FTMS	0	0	0	-1	0	0	0	0	5				NaN	1	NaN	NaN	NaN	NaN	1578	0	1	2576	4151
20140904-PurClathDigest-1ug-01	4157	36.565	60.735	472420	0	NaN	62794	0.4	+	2645	LGSLVENNER	10	89	565.793850383562	1129.57314783392	2	MULTI	HCD	FTMS	0	0	0	-1	0	0	0	0	6	Unmodified	_LGSLVENNER_	Q3SYW6	143.768402099609	1	NaN	NaN	NaN	NaN	1579	0	1	2576	4151
20140904-PurClathDigest-1ug-01	4158	36.568	53.116	567720	0	NaN	64482	0.4	-	-1		0	104	813.738423916913	2438.19344235094	3	MULTI	HCD	FTMS	0	0	0	-1	0	0	0	0	7				NaN	1	NaN	NaN	NaN	NaN	1580	0	1	2576	4151
20140904-PurClathDigest-1ug-01	4160	36.58	29.585	2212300	0	NaN	451980	0.42	-	-1		0	97	505.224302370755	1008.43405180831	2	MULTI	HCD	FTMS	0	0	0	-1	0	0	0	0	1				NaN	1	NaN	NaN	NaN	NaN	1581	0	1	2577	4159
20140904-PurClathDigest-1ug-01	4161	36.584	39.63	1178600	0	NaN	218170	0.39	+	2419	LASVSADTDVAR	12	80	602.812325368611	1203.61009780402	2	MULTI	HCD	FTMS	0	0	0	-1	0	0	0	0	2	Unmodified	_LASVSADTDVAR_	F1MEW3	153.789505004883	1	NaN	NaN	NaN	NaN	1582	0	1	2577	4159
20140904-PurClathDigest-1ug-01	4162	36.588	45.926	1254900	0	NaN	199240	0.39	+	4207	TGIVLANGK	9	106	436.763995663698	871.513438394196	2	MULTI	HCD	FTMS	0	0	0	-1	0	0	0	0	3	Unmodified	_TGIVLANGK_	F1N3M8;G3MYP5	92.3567428588867	1	NaN	NaN	NaN	NaN	1583	0	1	2577	4159
20140904-PurClathDigest-1ug-01	4163	36.591	32.896	45766	0	NaN	5256.6	0.38	-	-1		0	25	1219.5874652715	3655.74056641471	3	MULTI	HCD	FTMS	0	0	0	-1	0	0	0	0	4				NaN	1	NaN	NaN	NaN	NaN	1584	0	1	2577	4159
20140904-PurClathDigest-1ug-01	4164	36.594	52.587	2246000	0	NaN	433100	0.39	-	-1		0	90	342.213628595658	682.412704258116	2	MULTI	HCD	FTMS	0	0	0	-1	0	0	0	0	5				NaN	1	NaN	NaN	NaN	NaN	1585	0	1	2577	4159
20140904-PurClathDigest-1ug-01	4165	36.598	65.246	441300	0	NaN	82466	0.41	-	-1		0	105	1065.45935227454	2128.90415161588	2	MULTI	HCD	FTMS	0	0	0	-1	0	0	0	0	6				NaN	1	NaN	NaN	NaN	NaN	1586	0	1	2577	4159
20140904-PurClathDigest-1ug-01	4166	36.602	42.637	150950	0	NaN	11572	0.39	-	-1		0	59	592.789219188518	NaN	0	PEAK	HCD	FTMS	0	0	0	-1	0	0	0	0	7				NaN	1	NaN	NaN	NaN	NaN	1587	0	1	2577	4159
20140904-PurClathDigest-1ug-01	4168	36.614	9.102	5412000	0	NaN	446710	0.39	+	4489	VDKLDASESLR	11	107	411.554129254164	1231.64055836269	3	MULTI	HCD	FTMS	0	0	0	-1	0	0	0	0	1	Unmodified	_VDKLDASESLR_	P49951;F1MPU0	133.57080078125	1	NaN	NaN	NaN	NaN	1588	0	1	2578	4167
20140904-PurClathDigest-1ug-01	4169	36.617	15.876	3538000	0	NaN	666700	0.36	+	4480	VDKLDASESLR	11	107	616.827114476943	1231.63967602069	2	MULTI	HCD	FTMS	0	0	0	-1	0	0	0	0	2	Unmodified	_VDKLDASESLR_	P49951;F1MPU0	158.663299560547	1	NaN	NaN	NaN	NaN	1589	0	1	2578	4167
20140904-PurClathDigest-1ug-01	4170	36.62	16.528	8692800	0	NaN	179070	0.35	-	-1		0	241	759.634278507032	3034.50800816173	4	MULTI	HCD	FTMS	0	0	0	-1	0	0	0	0	3				NaN	1	NaN	NaN	NaN	NaN	1590	0	1	2578	4167
20140904-PurClathDigest-1ug-01	4171	36.623	34.24	2065900	0	NaN	125240	0.38	+	886	EMQFLMQK	8	97	543.751779177614	1085.48900542203	2	MULTI	HCD	FTMS	0	0	0	-1	0	0	0	0	4	2 Oxidation (M)	_EM(ox)QFLM(ox)QK_	F1N3M8;G3MYP5	58.1941795349121	1	NaN	NaN	NaN	NaN	1591	0	1	2578	4167
20140904-PurClathDigest-1ug-01	4172	36.626	44.82	1012800	0	NaN	111120	0.39	+	4976	YEALKEPMVAR	11	97	441.564079523977	1321.67040917213	3	MULTI	HCD	FTMS	0	0	0	-1	0	0	0	0	5	Oxidation (M)	_YEALKEPM(ox)VAR_	E1BFB0	37.7638511657715	1	NaN	NaN	NaN	NaN	1592	0	1	2578	4167
20140904-PurClathDigest-1ug-01	4173	36.63	41.229	639250	0	NaN	87332	0.39	-	-1		0	117	564.267598404075	2253.0412877499	4	MULTI	HCD	FTMS	0	0	0	-1	0	0	0	0	6				NaN	1	NaN	NaN	NaN	NaN	1593	0	1	2578	4167
20140904-PurClathDigest-1ug-01	4174	36.633	96.66	325350	0	NaN	35942	0.45	-	-1		0	139	742.330212523616	1482.64587211403	2	MULTI	HCD	FTMS	0	0	0	-1	0	0	0	0	7				NaN	1	NaN	NaN	NaN	NaN	1594	0	1	2578	4167
20140904-PurClathDigest-1ug-01	4176	36.646	2.679	18275000	0	NaN	3762700	0.39	-	-1		0	69	454.236787253036	906.459021572873	2	MULTI	HCD	FTMS	0	0	0	-1	0	0	0	0	1				NaN	1	NaN	NaN	NaN	NaN	1595	0	1	2579	4175
20140904-PurClathDigest-1ug-01	4177	36.649	6.798	2169100	0	NaN	157570	0.36	-	-1		0	122	1012.51052331793	3034.50974055399	3	MULTI	HCD	FTMS	0	0	0	-1	0	0	0	0	2				NaN	1	NaN	NaN	NaN	NaN	1596	0	1	2579	4175
20140904-PurClathDigest-1ug-01	4178	36.652	34.759	713030	0	NaN	39001	0.38	+	1945	KEDIAINGEVEGKEEEQETK	20	134	1138.54257030132	2275.07058766944	2	MULTI	HCD	FTMS	0	0	0	-1	0	0	0	0	3	Deamidation (NQ)	_KEDIAIN(de)GEVEGKEEEQETK_	F1MDZ2;O77788	187.147201538086	1	NaN	NaN	NaN	NaN	1597	0	1	2579	4175
20140904-PurClathDigest-1ug-01	4179	36.656	38.539	750640	0	NaN	41688	0.39	+	1947	KEDIAINGEVEGKEEEQETK	20	117	569.775172233076	2275.07158306591	4	MULTI	HCD	FTMS	0	0	0	-1	0	0	0	0	4	Deamidation (NQ)	_KEDIAIN(de)GEVEGKEEEQETK_	F1MDZ2;O77788	103.742797851563	1	NaN	NaN	NaN	NaN	1598	0	1	2579	4175
20140904-PurClathDigest-1ug-01	4180	36.659	45.205	1003600	0	NaN	112370	0.39	-	-1		0	74	353.242699187838	1056.70626816372	3	MULTI	HCD	FTMS	0	0	0	-1	0	0	0	0	5				NaN	1	NaN	NaN	NaN	NaN	1599	0	1	2579	4175
20140904-PurClathDigest-1ug-01	4181	36.663	77.336	80985	0	NaN	20838	0.43	-	-1		0	55	660.827562347397	1319.64057176159	2	MULTI	HCD	FTMS	0	0	0	-1	0	0	0	0	6				NaN	1	NaN	NaN	NaN	NaN	1600	0	1	2579	4175
20140904-PurClathDigest-1ug-01	4182	36.667	72.057	54553	0	NaN	4751	0.42	-	-1		0	46	885.937074930481	1769.85959692776	2	MULTI	HCD	FTMS	0	0	0	-1	0	0	0	0	7				NaN	1	NaN	NaN	NaN	NaN	1601	0	1	2579	4175
20140904-PurClathDigest-1ug-01	4184	36.679	0.285	194110000	0	NaN	32296000	0.39	+	1828	IYIDSNNNPER	11	96	667.820084169558	1333.62561540592	2	MULTI	HCD	FTMS	0	0	0	-1	0	0	0	0	1	Unmodified	_IYIDSNNNPER_	P49951;F1MPU0	179.922103881836	1	NaN	NaN	NaN	NaN	1602	0	1	2580	4183
20140904-PurClathDigest-1ug-01	4185	36.682	9.774	2715900	0	NaN	251360	0.35	-	-1		0	128	552.64628116418	1654.91701409274	3	MULTI	HCD	FTMS	0	0	0	-1	0	0	0	0	2				NaN	1	NaN	NaN	NaN	NaN	1603	0	1	2580	4183
20140904-PurClathDigest-1ug-01	4186	36.685	45.415	1306600	0	NaN	220840	0.39	+	3836	SKFADLNDAAAR	12	100	639.825582955248	1277.6366129773	2	MULTI	HCD	FTMS	0	0	0	-1	0	0	0	0	3	Unmodified	_SKFADLNDAAAR_	Q28115	143.720199584961	1	NaN	NaN	NaN	NaN	1604	0	1	2580	4183
20140904-PurClathDigest-1ug-01	4187	36.689	42.99	1396400	0	NaN	130160	0.39	-	-1		0	96	417.240047066504	832.465541199808	2	MULTI	HCD	FTMS	0	0	0	-1	0	0	0	0	4				NaN	1	NaN	NaN	NaN	NaN	1605	0	1	2580	4183
20140904-PurClathDigest-1ug-01	4188	36.692	46.08	867580	0	NaN	183820	0.4	-	-1		0	118	904.381649807869	1806.74874668254	2	MULTI	HCD	FTMS	0	0	0	-1	0	0	0	0	5				NaN	1	NaN	NaN	NaN	NaN	1606	0	1	2580	4183
20140904-PurClathDigest-1ug-01	4189	36.696	32.528	359200	0	NaN	42286	0.38	+	3837	SKFADLNDAAAR	12	65	426.886538687971	1277.63778666411	3	MULTI	HCD	FTMS	0	0	0	-1	0	0	0	0	6	Unmodified	_SKFADLNDAAAR_	Q28115	107.155700683594	1	NaN	NaN	NaN	NaN	1607	0	1	2580	4183
20140904-PurClathDigest-1ug-01	4190	36.699	58.805	1141200	0	NaN	122150	0.41	+	1058	FANLNEQAAR	10	129	567.289068792215	1132.56358465123	2	MULTI	HCD	FTMS	0	0	0	-1	0	0	0	0	7	Unmodified	_FANLNEQAAR_	Q08DH7	135.746398925781	1	NaN	NaN	NaN	NaN	1608	0	1	2580	4183
20140904-PurClathDigest-1ug-01	4192	36.711	1.64	18526000	0	NaN	768240	0.38	-	-1		0	148	759.634278507032	3034.50800816173	4	MULTI	HCD	FTMS	0	0	0	-1	0	0	0	0	1				NaN	1	NaN	NaN	NaN	NaN	1609	0	1	2581	4191
20140904-PurClathDigest-1ug-01	4193	36.714	18.272	5089200	0	NaN	671280	0.36	+	2499	LEALDANSR	9	107	495.248359148616	988.482165364031	2	MULTI	HCD	FTMS	0	0	0	-1	0	0	0	0	2	Deamidation (NQ)	_LEALDAN(de)SR_	P04973	155.675598144531	1	NaN	NaN	NaN	NaN	1610	0	1	2581	4191
20140904-PurClathDigest-1ug-01	4194	36.717	53.289	520190	0	NaN	257810	0.4	-	-1		0	98	908.461582640562	1814.90861234792	2	MULTI	HCD	FTMS	0	0	0	-1	0	0	0	0	3				NaN	1	NaN	NaN	NaN	NaN	1611	0	1	2581	4191
20140904-PurClathDigest-1ug-01	4195	36.721	51.483	105320	0	NaN	12430	0.4	-	-1		0	43	808.904507188515	1615.79446144383	2	MULTI	HCD	FTMS	0	0	0	-1	0	0	0	0	4				NaN	1	NaN	NaN	NaN	NaN	1612	0	1	2581	4191
20140904-PurClathDigest-1ug-01	4196	36.724	39.219	149250	0	NaN	54799	0.39	-	-1		0	45	679.007383064176	2034.00031979273	3	MULTI	HCD	FTMS	0	0	0	-1	0	0	0	0	5				NaN	1	NaN	NaN	NaN	NaN	1613	0	1	2581	4191
20140904-PurClathDigest-1ug-01	4197	36.728	56.664	1102800	0	NaN	264540	0.4	-	-1		0	75	361.695226988492	721.375901043785	2	MULTI	HCD	FTMS	0	0	0	-1	0	0	0	0	6				NaN	1	NaN	NaN	NaN	NaN	1614	0	1	2581	4191
20140904-PurClathDigest-1ug-01	4198	36.732	77.025	1181700	0	NaN	163600	0.42	+	1349	GTEITHAVVIK	11	136	584.340216116444	1166.66587929969	2	MULTI	HCD	FTMS	0	0	0	-1	0	0	0	0	7	Unmodified	_GTEITHAVVIK_	Q3SYW6	152.038101196289	1	NaN	NaN	NaN	NaN	1615	0	1	2581	4191
20140904-PurClathDigest-1ug-01	4200	36.744	7.936	221370	0	NaN	29225	0.38	-	-1		0	27	890.091354164591	2667.25223309397	3	MULTI	HCD	FTMS	0	0	0	-1	0	0	0	0	1				NaN	1	NaN	NaN	NaN	NaN	1616	0	1	2582	4199
20140904-PurClathDigest-1ug-01	4201	36.747	11.632	5184300	0	NaN	803040	0.36	+	1912	KDLEEWNQR	9	112	609.299277586894	1216.58400224059	2	MULTI	HCD	FTMS	0	0	0	-1	0	0	0	0	2	Unmodified	_KDLEEWNQR_	G3N252;P04975	249.644302368164	1	NaN	NaN	NaN	NaN	1617	0	1	2582	4199
20140904-PurClathDigest-1ug-01	4202	36.75	29.767	1017400	0	NaN	145780	0.37	+	1914	KDLEEWNQR	9	91	406.535384772448	1216.58432491754	3	MULTI	HCD	FTMS	0	0	0	-1	0	0	0	0	3	Unmodified	_KDLEEWNQR_	G3N252;P04975	135.464492797852	1	NaN	NaN	NaN	NaN	1618	0	1	2582	4199
20140904-PurClathDigest-1ug-01	4203	36.754	26.69	4632800	0	NaN	509000	0.37	-	-1		0	221	677.339080224967	2028.9954112751	3	MULTI	HCD	FTMS	0	0	0	-1	0	0	0	0	4				NaN	1	NaN	NaN	NaN	NaN	1619	0	1	2582	4199
20140904-PurClathDigest-1ug-01	4204	36.757	66.675	933740	0	NaN	92977	0.41	-	-1		0	112	585.745402270533	1169.47625160786	2	MULTI	HCD	FTMS	0	0	0	-1	0	0	0	0	5				NaN	1	NaN	NaN	NaN	NaN	1620	0	1	2582	4199
20140904-PurClathDigest-1ug-01	4205	36.761	54.376	370760	0	NaN	24197	0.4	-	-1		0	119	748.599463785052	2990.36874927381	4	MULTI	HCD	FTMS	0	0	0	-1	0	0	0	0	6				NaN	1	NaN	NaN	NaN	NaN	1621	0	1	2582	4199
20140904-PurClathDigest-1ug-01	4206	36.764	77.23	424680	0	NaN	77229	0.42	-	-1		0	91	431.724816995786	861.435081058371	2	MULTI	HCD	FTMS	0	0	0	-1	0	0	0	0	7				NaN	1	NaN	NaN	NaN	NaN	1622	0	1	2582	4199
20140904-PurClathDigest-1ug-01	4208	36.777	19.592	2841100	0	NaN	587130	0.39	-	-1		0	92	463.219256469633	924.423960006067	2	MULTI	HCD	FTMS	0	0	0	-1	0	0	0	0	1				NaN	1	NaN	NaN	NaN	NaN	1623	0	1	2583	4207
20140904-PurClathDigest-1ug-01	4209	36.78	36.447	1904600	0	NaN	547270	0.38	+	3995	SQYEQLAEQNR	11	120	683.322411940779	1364.63027094836	2	MULTI	HCD	FTMS	0	0	0	-1	0	0	0	0	2	Unmodified	_SQYEQLAEQNR_	CON__P13645	179.841201782227	1	NaN	NaN	NaN	NaN	1624	0	1	2583	4207
20140904-PurClathDigest-1ug-01	4210	36.784	48.717	688730	0	NaN	58273	0.4	+	3426	QLQSISQAAASGGAK	15	114	708.875483970287	1415.73641500737	2	MULTI	HCD	FTMS	0	0	0	-1	0	0	0	0	3	Unmodified	_QLQSISQAAASGGAK_	E1BDX8	151.696395874023	1	NaN	NaN	NaN	NaN	1625	0	1	2583	4207
20140904-PurClathDigest-1ug-01	4211	36.787	50.307	883670	0	NaN	99858	0.4	-	-1		0	162	1015.50588228467	2028.99721163614	2	MULTI	HCD	FTMS	0	0	0	-1	0	0	0	0	4				NaN	1	NaN	NaN	NaN	NaN	1626	0	1	2583	4207
20140904-PurClathDigest-1ug-01	4212	36.791	39.16	883890	0	NaN	113930	0.39	-	-1		0	96	529.360476134912	1056.70639933662	2	MULTI	HCD	FTMS	0	0	0	-1	0	0	0	0	5				NaN	1	NaN	NaN	NaN	NaN	1627	0	1	2583	4207
20140904-PurClathDigest-1ug-01	4213	36.794	25.689	2070300	0	NaN	105710	0.37	-	-1		0	166	634.059406784272	2532.20852127069	4	MULTI	HCD	FTMS	0	0	0	-1	0	0	0	0	6				NaN	1	NaN	NaN	NaN	NaN	1628	0	1	2583	4207
20140904-PurClathDigest-1ug-01	4214	36.797	43.66	425080	0	NaN	17164	0.39	-	-1		0	117	845.076613552513	2532.20801125774	3	MULTI	HCD	FTMS	0	0	0	-1	0	0	0	0	7				NaN	1	NaN	NaN	NaN	NaN	1629	0	1	2583	4207
20140904-PurClathDigest-1ug-01	4216	36.809	6.369	6489500	0	NaN	285850	0.38	-	-1		0	161	636.508407767733	3177.50565650566	5	MULTI	HCD	FTMS	0	0	0	-1	0	0	0	0	1				NaN	1	NaN	NaN	NaN	NaN	1630	0	1	2584	4215
20140904-PurClathDigest-1ug-01	4217	36.812	9.63	3589700	0	NaN	148940	0.36	-	-1		0	153	795.383509451001	3177.5049319376	4	MULTI	HCD	FTMS	0	0	0	-1	0	0	0	0	2				NaN	1	NaN	NaN	NaN	NaN	1631	0	1	2584	4215
20140904-PurClathDigest-1ug-01	4218	36.815	8.032	11138000	0	NaN	694330	0.35	-	-1		0	162	530.591859134245	3177.50749600587	6	MULTI	HCD	FTMS	0	0	0	-1	0	0	0	0	3				NaN	1	NaN	NaN	NaN	NaN	1632	0	1	2584	4215
20140904-PurClathDigest-1ug-01	4219	36.818	23.595	4069800	0	NaN	903470	0.37	+	4246	TLLEGEESR	9	102	517.261970059575	1032.50938718595	2	MULTI	HCD	FTMS	0	0	0	-1	0	0	0	0	4	Unmodified	_TLLEGEESR_	G3N0V2;CON__ENSEMBL:ENSBTAP00000038253;CON__P04264	152.779693603516	1	NaN	NaN	NaN	NaN	1633	0	1	2584	4215
20140904-PurClathDigest-1ug-01	4220	36.822	24.982	1272100	0	NaN	48986	0.37	-	-1		0	161	1060.17640065656	3177.50737256989	3	MULTI	HCD	FTMS	0	0	0	-1	0	0	0	0	5				NaN	1	NaN	NaN	NaN	NaN	1634	0	1	2584	4215
20140904-PurClathDigest-1ug-01	4221	36.825	39.283	1468200	0	NaN	333710	0.39	+	311	AMLSANIR	8	92	446.239258783011	890.463964632823	2	MULTI	HCD	FTMS	0	0	0	-1	0	0	0	0	6	Oxidation (M)	_AM(ox)LSANIR_	P49951;F1MPU0	97.1835021972656	1	NaN	NaN	NaN	NaN	1635	0	1	2584	4215
20140904-PurClathDigest-1ug-01	4222	36.828	35.54	920690	0	NaN	53689	0.38	-	-1		0	126	621.909002070635	1862.7051768121	3	MULTI	HCD	FTMS	0	0	0	-1	0	0	0	0	7				NaN	1	NaN	NaN	NaN	NaN	1636	0	1	2584	4215
20140904-PurClathDigest-1ug-01	4224	36.84	3.6	9003800	0	NaN	270470	0.36	+	1948	KEDIAINGEVEGKEEEQETK	20	149	759.363671870664	2275.06918621219	3	MULTI	HCD	FTMS	0	0	0	-1	0	0	0	0	1	Deamidation (NQ)	_KEDIAIN(de)GEVEGKEEEQETK_	F1MDZ2;O77788	166.73860168457	1	NaN	NaN	NaN	NaN	1637	0	1	2585	4223
20140904-PurClathDigest-1ug-01	4225	36.843	12.423	6408800	0	NaN	809310	0.36	+	41	AEALEQTIK	9	117	501.777093441941	1001.53963395068	2	MULTI	HCD	FTMS	0	0	0	-1	0	0	0	0	2	Unmodified	_AEALEQTIK_	F1N3M8;G3MYP5	148.54020690918	1	NaN	NaN	NaN	NaN	1638	0	1	2585	4223
20140904-PurClathDigest-1ug-01	4226	36.846	18.58	3487600	0	NaN	626840	0.36	+	5002	YGLVGGEGGK	10	82	468.743113248994	935.471673564787	2	MULTI	HCD	FTMS	0	0	0	-1	0	0	0	0	3	Unmodified	_YGLVGGEGGK_	E1BKN2	133.102600097656	1	NaN	NaN	NaN	NaN	1639	0	1	2585	4223
20140904-PurClathDigest-1ug-01	4227	36.849	49.256	701030	0	NaN	51168	0.4	-	-1		0	143	788.36251517867	1574.71047742414	2	MULTI	HCD	FTMS	0	0	0	-1	0	0	0	0	4				NaN	1	NaN	NaN	NaN	NaN	1640	0	1	2585	4223
20140904-PurClathDigest-1ug-01	4228	36.853	46.391	1388400	0	NaN	84909	0.39	+	4747	VNEVNQFAAK	10	124	560.294525920082	1118.57449890696	2	MULTI	HCD	FTMS	0	0	0	-1	0	0	0	0	5	Unmodified	_VNEVNQFAAK_	E1BFB0	134.192596435547	1	NaN	NaN	NaN	NaN	1641	0	1	2585	4223
20140904-PurClathDigest-1ug-01	4229	36.856	49.793	93846	0	NaN	10824	0.4	-	-1		0	51	932.359015894061	1862.70347885492	2	MULTI	HCD	FTMS	0	0	0	-1	0	0	0	0	6				NaN	1	NaN	NaN	NaN	NaN	1642	0	1	2585	4223
20140904-PurClathDigest-1ug-01	4230	36.86	29.631	721580	0	NaN	86715	0.38	-	-1		0	113	508.256996808628	2028.99888136811	4	MULTI	HCD	FTMS	0	0	0	-1	0	0	0	0	7				NaN	1	NaN	NaN	NaN	NaN	1643	0	1	2585	4223
20140904-PurClathDigest-1ug-01	4232	36.872	8.505	4800900	0	NaN	417740	0.37	+	4490	VDKLDASESLR	11	104	411.554129254164	1231.64055836269	3	MULTI	HCD	FTMS	0	0	0	-1	0	0	0	0	1	Unmodified	_VDKLDASESLR_	P49951;F1MPU0	133.39599609375	1	NaN	NaN	NaN	NaN	1644	0	1	2586	4231
20140904-PurClathDigest-1ug-01	4233	36.875	16.137	3758800	0	NaN	702520	0.36	+	4481	VDKLDASESLR	11	98	616.827114476943	1231.63967602069	2	MULTI	HCD	FTMS	0	0	0	-1	0	0	0	0	2	Unmodified	_VDKLDASESLR_	P49951;F1MPU0	120.761497497559	1	NaN	NaN	NaN	NaN	1645	0	1	2586	4231
20140904-PurClathDigest-1ug-01	4234	36.878	27.816	2335300	0	NaN	679330	0.38	-	-1		0	104	545.298763953662	1088.58297497412	2	MULTI	HCD	FTMS	0	0	0	-1	0	0	0	0	3				NaN	1	NaN	NaN	NaN	NaN	1646	0	1	2586	4231
20140904-PurClathDigest-1ug-01	4235	36.881	40.148	1856100	0	NaN	177610	0.39	+	4021	STAGDTHLGGEDFDNR	16	161	846.366116599343	1690.71768026549	2	MULTI	HCD	FTMS	0	0	0	-1	0	0	0	0	4	Unmodified	_STAGDTHLGGEDFDNR_	P19120	257.807312011719	1	NaN	NaN	NaN	NaN	1647	0	1	2586	4231
20140904-PurClathDigest-1ug-01	4236	36.885	35.927	4137000	0	NaN	344010	0.4	+	4022	STAGDTHLGGEDFDNR	16	178	564.580205468699	1690.7187870063	3	MULTI	HCD	FTMS	0	0	0	-1	0	0	0	0	5	Unmodified	_STAGDTHLGGEDFDNR_	P19120	138.157104492188	1	NaN	NaN	NaN	NaN	1648	0	1	2586	4231
20140904-PurClathDigest-1ug-01	4237	36.888	42.63	2442800	0	NaN	535890	0.38	+	477	AVNYFSK	7	98	414.716097228494	827.417641523788	2	MULTI	HCD	FTMS	0	0	0	-1	0	0	0	0	6	Unmodified	_AVNYFSK_	P49951;F1MPU0	117.818000793457	1	NaN	NaN	NaN	NaN	1649	0	1	2586	4231
20140904-PurClathDigest-1ug-01	4238	36.891	60.832	873060	0	NaN	291030	0.41	-	-1		0	132	602.812325368611	1203.61009780402	2	MULTI	HCD	FTMS	0	0	0	-1	0	0	0	0	7				NaN	1	NaN	NaN	NaN	NaN	1650	0	1	2586	4231
20140904-PurClathDigest-1ug-01	4240	36.904	11.629	615150	0	NaN	49689	0.37	-	-1		0	74	569.775172233076	2275.07158306591	4	MULTI	HCD	FTMS	0	0	0	-1	0	0	0	0	1				NaN	1	NaN	NaN	NaN	NaN	1651	0	1	2587	4239
20140904-PurClathDigest-1ug-01	4241	36.907	18.612	679290	0	NaN	27641	0.37	+	1946	KEDIAINGEVEGKEEEQETK	20	85	1138.54257030132	2275.07058766944	2	MULTI	HCD	FTMS	0	0	0	-1	0	0	0	0	2	Deamidation (NQ)	_KEDIAIN(de)GEVEGKEEEQETK_	F1MDZ2;O77788	141.713897705078	1	NaN	NaN	NaN	NaN	1652	0	1	2587	4239
20140904-PurClathDigest-1ug-01	4242	36.91	32.516	1653000	0	NaN	318110	0.38	-	-1		0	90	454.238640192511	1359.69409117773	3	MULTI	HCD	FTMS	0	0	0	-1	0	0	0	0	3				NaN	1	NaN	NaN	NaN	NaN	1653	0	1	2587	4239
20140904-PurClathDigest-1ug-01	4243	36.913	22.88	834250	0	NaN	79469	0.37	-	-1		0	67	353.242699187838	1056.70626816372	3	MULTI	HCD	FTMS	0	0	0	-1	0	0	0	0	4				NaN	1	NaN	NaN	NaN	NaN	1654	0	1	2587	4239
20140904-PurClathDigest-1ug-01	4244	36.916	29.958	1923300	0	NaN	294120	0.38	+	3671	RTPVIDADKPVSSQLR	16	129	594.668112170275	1780.98250711102	3	MULTI	HCD	FTMS	0	0	0	-1	0	0	0	0	5	Unmodified	_RTPVIDADKPVSSQLR_	E1BDX8	113.203598022461	1	NaN	NaN	NaN	NaN	1655	0	1	2587	4239
20140904-PurClathDigest-1ug-01	4245	36.92	43.265	1230900	0	NaN	113630	0.36	-	-1		0	68	329.728480728433	657.442408523666	2	MULTI	HCD	FTMS	0	0	0	-1	0	0	0	0	6				NaN	1	NaN	NaN	NaN	NaN	1656	0	1	2587	4239
20140904-PurClathDigest-1ug-01	4246	36.923	35.194	2321900	0	NaN	379300	0.37	+	1559	IDLSHVTSK	9	109	333.853745567003	998.53940730121	3	MULTI	HCD	FTMS	0	0	0	-1	0	0	0	0	7	Unmodified	_IDLSHVTSK_	F1MEW3	73.6118621826172	1	NaN	NaN	NaN	NaN	1657	0	1	2587	4239
20140904-PurClathDigest-1ug-01	4248	36.935	2.4	15286000	0	NaN	2633800	0.37	+	1829	IYIDSNNNPER	11	71	667.820084169558	1333.62561540592	2	MULTI	HCD	FTMS	0	0	0	-1	0	0	0	0	1	Unmodified	_IYIDSNNNPER_	P49951;F1MPU0	187.960098266602	1	NaN	NaN	NaN	NaN	1658	0	1	2588	4247
20140904-PurClathDigest-1ug-01	4249	36.938	31.686	659630	0	NaN	146650	0.38	-	-1		0	101	904.381649807869	1806.74874668254	2	MULTI	HCD	FTMS	0	0	0	-1	0	0	0	0	2				NaN	1	NaN	NaN	NaN	NaN	1659	0	1	2588	4247
20140904-PurClathDigest-1ug-01	4250	36.942	43.081	984110	0	NaN	163360	0.39	-	-1		0	117	741.807415263577	1481.60027759395	2	MULTI	HCD	FTMS	0	0	0	-1	0	0	0	0	3				NaN	1	NaN	NaN	NaN	NaN	1660	0	1	2588	4247
20140904-PurClathDigest-1ug-01	4251	36.945	48.235	1074800	0	NaN	123670	0.4	+	440	ATAGDTHLGGEDFDNR	16	141	838.367806595976	1674.72106025875	2	MULTI	HCD	FTMS	0	0	0	-1	0	0	0	0	4	Unmodified	_ATAGDTHLGGEDFDNR_	P0CB32;F1MWU9;Q27965;Q27975	230.658294677734	1	NaN	NaN	NaN	NaN	1661	0	1	2588	4247
20140904-PurClathDigest-1ug-01	4252	36.949	53.836	2360000	0	NaN	913260	0.4	-	-1		0	102	417.240047066504	832.465541199808	2	MULTI	HCD	FTMS	0	0	0	-1	0	0	0	0	5				NaN	1	NaN	NaN	NaN	NaN	1662	0	1	2588	4247
20140904-PurClathDigest-1ug-01	4253	36.952	69.207	47408	0	NaN	2828.8	0.42	-	-1		0	45	752.326796204828	1502.63903947646	2	MULTI	HCD	FTMS	0	0	0	-1	0	0	0	0	6				NaN	1	NaN	NaN	NaN	NaN	1663	0	1	2588	4247
20140904-PurClathDigest-1ug-01	4254	36.956	72.922	528270	0	NaN	74299	0.42	+	4091	SVLVSAGNVK	10	98	487.287778193254	972.561003453309	2	MULTI	HCD	FTMS	0	0	0	-1	0	0	0	0	7	Unmodified	_SVLVSAGNVK_	E1BDX8	78.7418518066406	1	NaN	NaN	NaN	NaN	1664	0	1	2588	4247
20140904-PurClathDigest-1ug-01	4256	36.969	5.614	8724600	0	NaN	1072600	0.37	+	1059	FANLNEQAAR	10	95	567.289068792215	1132.56358465123	2	MULTI	HCD	FTMS	0	0	0	-1	0	0	0	0	1	Unmodified	_FANLNEQAAR_	Q08DH7	174.638397216797	1	NaN	NaN	NaN	NaN	1665	0	1	2589	4255
20140904-PurClathDigest-1ug-01	4257	36.972	17.334	2510500	0	NaN	220210	0.36	+	441	ATAGDTHLGGEDFDNR	16	135	559.248153051275	1674.72262975402	3	MULTI	HCD	FTMS	0	0	0	-1	0	0	0	0	2	Unmodified	_ATAGDTHLGGEDFDNR_	P0CB32;F1MWU9;Q27965;Q27975	124.597297668457	1	NaN	NaN	NaN	NaN	1666	0	1	2589	4255
20140904-PurClathDigest-1ug-01	4258	36.975	24.13	1146800	0	NaN	63891	0.37	+	4546	VEEPQKDQPDKIAEAPASEAVAAPK	25	141	873.448107179872	2617.32249213982	3	MULTI	HCD	FTMS	0	0	0	-1	0	0	0	0	3	Unmodified	_VEEPQKDQPDKIAEAPASEAVAAPK_	F1MEW3	107.859596252441	1	NaN	NaN	NaN	NaN	1667	0	1	2589	4255
20140904-PurClathDigest-1ug-01	4259	36.978	27.974	1422600	0	NaN	88276	0.38	+	4547	VEEPQKDQPDKIAEAPASEAVAAPK	25	161	655.338247173363	2617.32388282705	4	MULTI	HCD	FTMS	0	0	0	-1	0	0	0	0	4	Unmodified	_VEEPQKDQPDKIAEAPASEAVAAPK_	F1MEW3	60.3856391906738	1	NaN	NaN	NaN	NaN	1668	0	1	2589	4255
20140904-PurClathDigest-1ug-01	4260	36.981	45.564	840930	0	NaN	160780	0.39	-	-1		0	71	494.874807585613	NaN	0	PEAK	HCD	FTMS	0	0	0	-1	0	0	0	0	5				NaN	1	NaN	NaN	NaN	NaN	1669	0	1	2589	4255
20140904-PurClathDigest-1ug-01	4261	36.985	54.892	2617000	0	NaN	369130	0.4	-	-1		0	81	399.214926666228	796.415300399257	2	MULTI	HCD	FTMS	0	0	0	-1	0	0	0	0	6				NaN	1	NaN	NaN	NaN	NaN	1670	0	1	2589	4255
20140904-PurClathDigest-1ug-01	4262	36.989	51.751	316080	0	NaN	26274	0.39	-	-1		0	86	662.672952092864	1984.99702687879	3	MULTI	HCD	FTMS	0	0	0	-1	0	0	0	0	7				NaN	1	NaN	NaN	NaN	NaN	1671	0	1	2589	4255
20140904-PurClathDigest-1ug-01	4264	37.001	4.636	9244600	0	NaN	1436100	0.38	+	1913	KDLEEWNQR	9	101	609.299277586894	1216.58400224059	2	MULTI	HCD	FTMS	0	0	0	-1	0	0	0	0	1	Unmodified	_KDLEEWNQR_	G3N252;P04975	265.807006835938	1	NaN	NaN	NaN	NaN	1672	0	1	2590	4263
20140904-PurClathDigest-1ug-01	4265	37.004	10.832	2522500	0	NaN	387450	0.36	+	1915	KDLEEWNQR	9	81	406.535384772448	1216.58432491754	3	MULTI	HCD	FTMS	0	0	0	-1	0	0	0	0	2	Unmodified	_KDLEEWNQR_	G3N252;P04975	122.758003234863	1	NaN	NaN	NaN	NaN	1673	0	1	2590	4263
20140904-PurClathDigest-1ug-01	4266	37.007	20.199	2393200	0	NaN	178620	0.37	+	1560	IDLSHVTSK	9	95	500.277333276703	998.540113620206	2	MULTI	HCD	FTMS	0	0	0	-1	0	0	0	0	3	Unmodified	_IDLSHVTSK_	F1MEW3	159.578002929688	1	NaN	NaN	NaN	NaN	1674	0	1	2590	4263
20140904-PurClathDigest-1ug-01	4267	37.01	22.104	3822500	0	NaN	446230	0.37	-	-1		0	207	642.996806399821	1925.96858979966	3	MULTI	HCD	FTMS	0	0	0	-1	0	0	0	0	4				NaN	1	NaN	NaN	NaN	NaN	1675	0	1	2590	4263
20140904-PurClathDigest-1ug-01	4268	37.013	27.904	3711300	0	NaN	142550	0.38	-	-1		0	185	555.937713304169	1664.79131051271	3	MULTI	HCD	FTMS	0	0	0	-1	0	0	0	0	5				NaN	1	NaN	NaN	NaN	NaN	1676	0	1	2590	4263
20140904-PurClathDigest-1ug-01	4269	37.016	54.443	1068400	0	NaN	56523	0.41	+	1262	GNAMVEEGHFAAEDVK	16	183	860.384764437764	1718.75497594233	2	MULTI	HCD	FTMS	0	0	0	-1	0	0	0	0	6	Oxidation (M)	_GNAM(ox)VEEGHFAAEDVK_	E1BFB0	119.81909942627	1	NaN	NaN	NaN	NaN	1677	0	1	2590	4263
20140904-PurClathDigest-1ug-01	4270	37.02	31.314	3354900	0	NaN	216680	0.38	+	1263	GNAMVEEGHFAAEDVK	16	202	573.925682956581	1718.75521946994	3	MULTI	HCD	FTMS	0	0	0	-1	0	0	0	0	7	Oxidation (M)	_GNAM(ox)VEEGHFAAEDVK_	E1BFB0	97.4081573486328	1	NaN	NaN	NaN	NaN	1678	0	1	2590	4263
20140904-PurClathDigest-1ug-01	4272	37.031	6.865	8460200	0	NaN	918430	0.39	+	4984	YEEEVLSREDAEGR	14	125	561.260443110744	1680.75949993243	3	MULTI	HCD	FTMS	0	0	0	-1	0	0	0	0	1	Unmodified	_YEEEVLSREDAEGR_	P02548	146.559799194336	1	NaN	NaN	NaN	NaN	1679	0	1	2591	4271
20140904-PurClathDigest-1ug-01	4273	37.035	12.782	4674800	0	NaN	1226200	0.36	+	4985	YEEEVLSREDAEGR	14	125	841.386394239476	1680.75823554575	2	MULTI	HCD	FTMS	0	0	0	-1	0	0	0	0	2	Unmodified	_YEEEVLSREDAEGR_	P02548	206.35270690918	1	NaN	NaN	NaN	NaN	1680	0	1	2591	4271
20140904-PurClathDigest-1ug-01	4274	37.038	16.957	1332800	0	NaN	135390	0.37	+	2200	KTTAAGAESAQAPSVFK	17	121	832.436027556806	1662.85750218041	2	MULTI	HCD	FTMS	0	0	0	-1	0	0	0	0	3	Unmodified	_KTTAAGAESAQAPSVFK_	F1MEW3	189.294204711914	1	NaN	NaN	NaN	NaN	1681	0	1	2591	4271
20140904-PurClathDigest-1ug-01	4275	37.041	7.167	4204600	0	NaN	263040	0.35	-	-1		0	134	571.075400224625	2850.34061879012	5	MULTI	HCD	FTMS	0	0	0	-1	0	0	0	0	4				NaN	1	NaN	NaN	NaN	NaN	1682	0	1	2591	4271
20140904-PurClathDigest-1ug-01	4276	37.044	9.11	4187300	0	NaN	382540	0.36	-	-1		0	136	500.988083173953	1999.92322682941	4	MULTI	HCD	FTMS	0	0	0	-1	0	0	0	0	5				NaN	1	NaN	NaN	NaN	NaN	1683	0	1	2591	4271
20140904-PurClathDigest-1ug-01	4277	37.047	10.52	6614900	0	NaN	401820	0.36	-	-1		0	178	713.592463949899	2850.3407499332	4	MULTI	HCD	FTMS	0	0	0	-1	0	0	0	0	6				NaN	1	NaN	NaN	NaN	NaN	1684	0	1	2591	4271
20140904-PurClathDigest-1ug-01	4278	37.05	23.975	2793400	0	NaN	145220	0.37	+	3469	QSVEADINGLRR	12	143	679.854360714739	1357.69416849628	2	MULTI	HCD	FTMS	0	0	0	-1	0	0	0	0	7	Deamidation (NQ)	_QSVEADIN(de)GLRR_	CON__ENSEMBL:ENSP00000377550;P06394;CON__P13646-1;Q17QL7;A6QNZ7;CON__P02535-1;CON__P08730-1;CON__P13645	292.074493408203	1	NaN	NaN	NaN	NaN	1685	0	1	2591	4271
20140904-PurClathDigest-1ug-01	4280	37.061	6.57	4369700	0	NaN	199350	0.4	-	-1		0	133	735.697254634252	2204.06993450296	3	MULTI	HCD	FTMS	0	0	0	-1	0	0	0	0	1				NaN	1	NaN	NaN	NaN	NaN	1686	0	1	2592	4279
20140904-PurClathDigest-1ug-01	4281	37.065	5.923	5294000	0	NaN	306830	0.35	-	-1		0	127	713.592463949899	2850.3407499332	4	MULTI	HCD	FTMS	0	0	0	-1	0	0	0	0	2				NaN	1	NaN	NaN	NaN	NaN	1687	0	1	2592	4279
20140904-PurClathDigest-1ug-01	4282	37.067	10.97	3028900	0	NaN	219260	0.36	+	2201	KTTAAGAESAQAPSVFK	17	113	555.293176809698	1662.85770102929	3	MULTI	HCD	FTMS	0	0	0	-1	0	0	0	0	3	Unmodified	_KTTAAGAESAQAPSVFK_	F1MEW3	122.938499450684	1	NaN	NaN	NaN	NaN	1688	0	1	2592	4279
20140904-PurClathDigest-1ug-01	4283	37.07	8.124	2324700	0	NaN	115580	0.35	-	-1		0	106	636.508407767733	3177.50565650566	5	MULTI	HCD	FTMS	0	0	0	-1	0	0	0	0	4				NaN	1	NaN	NaN	NaN	NaN	1689	0	1	2592	4279
20140904-PurClathDigest-1ug-01	4284	37.073	8.777	13460000	0	NaN	867150	0.35	-	-1		0	167	463.234089766458	1848.90725319943	4	MULTI	HCD	FTMS	0	0	0	-1	0	0	0	0	5				NaN	1	NaN	NaN	NaN	NaN	1690	0	1	2592	4279
20140904-PurClathDigest-1ug-01	4285	37.076	10.539	5509400	0	NaN	196880	0.36	-	-1		0	174	552.025622813772	2204.07338538869	4	MULTI	HCD	FTMS	0	0	0	-1	0	0	0	0	6				NaN	1	NaN	NaN	NaN	NaN	1691	0	1	2592	4279
20140904-PurClathDigest-1ug-01	4286	37.079	9.921	3753100	0	NaN	421610	0.36	-	-1		0	128	456.232822848253	1820.90218552661	4	MULTI	HCD	FTMS	0	0	0	-1	0	0	0	0	7				NaN	1	NaN	NaN	NaN	NaN	1692	0	1	2592	4279
20140904-PurClathDigest-1ug-01	4288	37.09	8.864	1125500	0	NaN	63409	0.39	+	238	ALEGEEEEETANVQMSEK	18	86	1019.94121944797	2037.86788596274	2	MULTI	HCD	FTMS	0	0	0	-1	0	0	0	0	1	Oxidation (M)	_ALEGEEEEETANVQM(ox)SEK_	F1N3M8;G3MYP5	88.0677871704102	1	NaN	NaN	NaN	NaN	1693	0	1	2593	4287
20140904-PurClathDigest-1ug-01	4289	37.094	7.893	943710	0	NaN	94671	0.36	-	-1		0	70	951.120509400799	2850.3396988026	3	MULTI	HCD	FTMS	0	0	0	-1	0	0	0	0	2				NaN	1	NaN	NaN	NaN	NaN	1694	0	1	2593	4287
20140904-PurClathDigest-1ug-01	4290	37.097	6.526	7602500	0	NaN	588410	0.35	-	-1		0	163	617.310180722862	1848.90871276879	3	MULTI	HCD	FTMS	0	0	0	-1	0	0	0	0	3				NaN	1	NaN	NaN	NaN	NaN	1695	0	1	2593	4287
20140904-PurClathDigest-1ug-01	4291	37.099	12.141	1632200	0	NaN	92357	0.36	-	-1		0	116	903.738022794834	2708.1922389847	3	MULTI	HCD	FTMS	0	0	0	-1	0	0	0	0	4				NaN	1	NaN	NaN	NaN	NaN	1696	0	1	2593	4287
20140904-PurClathDigest-1ug-01	4292	37.102	13.059	2983800	0	NaN	345110	0.36	-	-1		0	157	558.593656825095	1672.75914107548	3	MULTI	HCD	FTMS	0	0	0	-1	0	0	0	0	5				NaN	1	NaN	NaN	NaN	NaN	1697	0	1	2593	4287
20140904-PurClathDigest-1ug-01	4293	37.106	11.178	5786900	0	NaN	916520	0.35	-	-1		0	107	453.5723684294	2715.3905517768	6	MULTI	HCD	FTMS	0	0	0	-1	0	0	0	0	6				NaN	1	NaN	NaN	NaN	NaN	1698	0	1	2593	4287
20140904-PurClathDigest-1ug-01	4294	37.108	25.43	1437700	0	NaN	48919	0.37	-	-1		0	145	537.269619380098	1608.78702874049	3	MULTI	HCD	FTMS	0	0	0	-1	0	0	0	0	7				NaN	1	NaN	NaN	NaN	NaN	1699	0	1	2593	4287
20140904-PurClathDigest-1ug-01	4296	37.12	3.034	15604000	0	NaN	2670900	0.38	+	1837	IYIDSNNNPER	11	87	668.312866474	1334.6111800148	2	MULTI	HCD	FTMS	0	0	0	-1	0	0	0	0	1	Deamidation (NQ)	_IYIDSNN(de)NPER_	P49951;F1MPU0	180.360992431641	1	NaN	NaN	NaN	NaN	1700	0	1	2594	4295
20140904-PurClathDigest-1ug-01	4297	37.123	15.324	3616600	0	NaN	290770	0.36	+	4491	VDKLDASESLR	11	108	411.554129254164	1231.64055836269	3	MULTI	HCD	FTMS	0	0	0	-1	0	0	0	0	2	Unmodified	_VDKLDASESLR_	P49951;F1MPU0	120.947998046875	1	NaN	NaN	NaN	NaN	1701	0	1	2594	4295
20140904-PurClathDigest-1ug-01	4298	37.126	24.926	1019100	0	NaN	83459	0.37	-	-1		0	144	788.362591303141	1574.71062967308	2	MULTI	HCD	FTMS	0	0	0	-1	0	0	0	0	3				NaN	1	NaN	NaN	NaN	NaN	1702	0	1	2594	4295
20140904-PurClathDigest-1ug-01	4299	37.129	14.992	5776800	0	NaN	560910	0.36	-	-1		0	182	543.930029405116	1628.76825881555	3	MULTI	HCD	FTMS	0	0	0	-1	0	0	0	0	4				NaN	1	NaN	NaN	NaN	NaN	1703	0	1	2594	4295
20140904-PurClathDigest-1ug-01	4300	37.132	24.446	1340700	0	NaN	266390	0.37	-	-1		0	108	925.4602022488	1848.9058515644	2	MULTI	HCD	FTMS	0	0	0	-1	0	0	0	0	5				NaN	1	NaN	NaN	NaN	NaN	1704	0	1	2594	4295
20140904-PurClathDigest-1ug-01	4301	37.136	18.925	4592500	0	NaN	312850	0.37	-	-1		0	134	459.917294772169	1376.73005491671	3	MULTI	HCD	FTMS	0	0	0	-1	0	0	0	0	6				NaN	1	NaN	NaN	NaN	NaN	1705	0	1	2594	4295
20140904-PurClathDigest-1ug-01	4302	37.139	37.442	537860	0	NaN	83753	0.39	-	-1		0	113	837.386845758763	1672.75913858433	2	MULTI	HCD	FTMS	0	0	0	-1	0	0	0	0	7				NaN	1	NaN	NaN	NaN	NaN	1706	0	1	2594	4295
20140904-PurClathDigest-1ug-01	4304	37.15	19.245	1033000	0	NaN	125990	0.39	-	-1		0	107	815.390830395569	1628.76710785794	2	MULTI	HCD	FTMS	0	0	0	-1	0	0	0	0	1				NaN	1	NaN	NaN	NaN	NaN	1707	0	1	2595	4303
20140904-PurClathDigest-1ug-01	4305	37.154	24.02	1330500	0	NaN	149720	0.35	-	-1		0	144	750.326682718541	1498.63881250388	2	MULTI	HCD	FTMS	0	0	0	-1	0	0	0	0	2				NaN	1	NaN	NaN	NaN	NaN	1708	0	1	2595	4303
20140904-PurClathDigest-1ug-01	4306	37.157	20.381	426810	0	NaN	39130	0.36	-	-1		0	66	680.29576597604	2037.86546852832	3	MULTI	HCD	FTMS	0	0	0	-1	0	0	0	0	3				NaN	1	NaN	NaN	NaN	NaN	1709	0	1	2595	4303
20140904-PurClathDigest-1ug-01	4307	37.16	41.661	472090	0	NaN	45177	0.39	-	-1		0	112	827.386666496189	1652.75878005918	2	MULTI	HCD	FTMS	0	0	0	-1	0	0	0	0	4				NaN	1	NaN	NaN	NaN	NaN	1710	0	1	2595	4303
20140904-PurClathDigest-1ug-01	4308	37.164	23.203	70382	0	NaN	12233	0.37	-	-1		0	29	1125.16699823792	3372.47916531396	3	MULTI	HCD	FTMS	0	0	0	-1	0	0	0	0	5				NaN	1	NaN	NaN	NaN	NaN	1711	0	1	2595	4303
20140904-PurClathDigest-1ug-01	4309	37.167	29.699	2544200	0	NaN	198280	0.37	-	-1		0	121	366.200979708767	1095.5811097265	3	MULTI	HCD	FTMS	0	0	0	-1	0	0	0	0	6				NaN	1	NaN	NaN	NaN	NaN	1712	0	1	2595	4303
20140904-PurClathDigest-1ug-01	4310	37.17	35.551	150280	0	NaN	55946	0.39	-	-1		0	32	890.74739955965	2669.22036927915	3	MULTI	HCD	FTMS	0	0	0	-1	0	0	0	0	7				NaN	1	NaN	NaN	NaN	NaN	1713	0	1	2595	4303
20140904-PurClathDigest-1ug-01	4312	37.182	10.475	8443900	0	NaN	2163400	0.39	+	545	DGLAEEVQR	9	107	508.754371007336	1015.49418908147	2	MULTI	HCD	FTMS	0	0	0	-1	0	0	0	0	1	Unmodified	_DGLAEEVQR_	Q08DH7	171.237503051758	1	NaN	NaN	NaN	NaN	1714	0	1	2596	4311
20140904-PurClathDigest-1ug-01	4313	37.185	19.609	2321300	0	NaN	177580	0.37	+	1644	IQDWYDKK	8	98	548.277806533548	1094.5410601339	2	MULTI	HCD	FTMS	0	0	0	-1	0	0	0	0	2	Unmodified	_IQDWYDKK_	CON__P35527	106.344703674316	1	NaN	NaN	NaN	NaN	1715	0	1	2596	4311
20140904-PurClathDigest-1ug-01	4314	37.188	24.239	2629500	0	NaN	591670	0.37	+	3878	SLSLSEESPSK	11	101	582.293393941259	1162.57223494932	2	MULTI	HCD	FTMS	0	0	0	-1	0	0	0	0	3	Unmodified	_SLSLSEESPSK_	F1N3M8;G3MYP5	158.660507202148	1	NaN	NaN	NaN	NaN	1716	0	1	2596	4311
20140904-PurClathDigest-1ug-01	4315	37.191	25.976	1112700	0	NaN	155020	0.37	-	-1		0	71	585.745078605253	1169.47560427731	2	MULTI	HCD	FTMS	0	0	0	-1	0	0	0	0	4				NaN	1	NaN	NaN	NaN	NaN	1717	0	1	2596	4311
20140904-PurClathDigest-1ug-01	4316	37.195	17.843	1293600	0	NaN	80661	0.36	+	1603	IKFEMEQNLR	10	116	441.895630051222	1322.66506075387	3	MULTI	HCD	FTMS	0	0	0	-1	0	0	0	0	5	Oxidation (M)	_IKFEM(ox)EQNLR_	CON__P35527	79.4495010375977	1	NaN	NaN	NaN	NaN	1718	0	1	2596	4311
20140904-PurClathDigest-1ug-01	4317	37.198	23.613	2449200	0	NaN	221520	0.37	+	1645	IQDWYDKK	8	106	365.853713607893	1094.53931142388	3	MULTI	HCD	FTMS	0	0	0	-1	0	0	0	0	6	Unmodified	_IQDWYDKK_	CON__P35527	53.8275299072266	1	NaN	NaN	NaN	NaN	1719	0	1	2596	4311
20140904-PurClathDigest-1ug-01	4318	37.201	32.733	1346700	0	NaN	283820	0.38	+	1604	IKFEMEQNLR	10	114	662.340543526151	1322.6665341191	2	MULTI	HCD	FTMS	0	0	0	-1	0	0	0	0	7	Oxidation (M)	_IKFEM(ox)EQNLR_	CON__P35527	65.6151885986328	1	NaN	NaN	NaN	NaN	1720	0	1	2596	4311
20140904-PurClathDigest-1ug-01	4320	37.212	4.494	7058700	0	NaN	751820	0.39	-	-1		0	115	529.744722330513	2114.94978345565	4	MULTI	HCD	FTMS	0	0	0	-1	0	0	0	0	1				NaN	1	NaN	NaN	NaN	NaN	1721	0	1	2597	4319
20140904-PurClathDigest-1ug-01	4321	37.216	6.313	4486600	0	NaN	269230	0.35	-	-1		0	141	705.990002185163	2114.94817715569	3	MULTI	HCD	FTMS	0	0	0	-1	0	0	0	0	2				NaN	1	NaN	NaN	NaN	NaN	1722	0	1	2597	4319
20140904-PurClathDigest-1ug-01	4322	37.219	9.079	8208200	0	NaN	1497700	0.36	+	4979	YEEEVLSR	8	89	512.750937187604	1023.48732144201	2	MULTI	HCD	FTMS	0	0	0	-1	0	0	0	0	3	Unmodified	_YEEEVLSR_	P02548	162.118392944336	1	NaN	NaN	NaN	NaN	1723	0	1	2597	4319
20140904-PurClathDigest-1ug-01	4323	37.221	10.756	2517300	0	NaN	76899	0.36	-	-1		0	146	796.654970595512	2386.94308238674	3	MULTI	HCD	FTMS	0	0	0	-1	0	0	0	0	4				NaN	1	NaN	NaN	NaN	NaN	1724	0	1	2597	4319
20140904-PurClathDigest-1ug-01	4324	37.224	13.028	3692400	0	NaN	288990	0.36	-	-1		0	117	650.949424473102	1949.82644401951	3	MULTI	HCD	FTMS	0	0	0	-1	0	0	0	0	5				NaN	1	NaN	NaN	NaN	NaN	1725	0	1	2597	4319
20140904-PurClathDigest-1ug-01	4325	37.227	20.697	1430800	0	NaN	307470	0.37	-	-1		0	89	557.2784117851	1112.542270637	2	MULTI	HCD	FTMS	0	0	0	-1	0	0	0	0	6				NaN	1	NaN	NaN	NaN	NaN	1726	0	1	2597	4319
20140904-PurClathDigest-1ug-01	4326	37.23	22.654	1229900	0	NaN	82125	0.37	-	-1		0	132	1058.48249474119	2114.95043654917	2	MULTI	HCD	FTMS	0	0	0	-1	0	0	0	0	7				NaN	1	NaN	NaN	NaN	NaN	1727	0	1	2597	4319
20140904-PurClathDigest-1ug-01	4328	37.242	12.157	538680	0	NaN	27496	0.39	-	-1		0	68	678.054887636148	2708.19044467819	4	MULTI	HCD	FTMS	0	0	0	-1	0	0	0	0	1				NaN	1	NaN	NaN	NaN	NaN	1728	0	1	2598	4327
20140904-PurClathDigest-1ug-01	4329	37.245	18.02	1461400	0	NaN	304220	0.37	-	-1		0	99	724.993539620153	2171.95878946066	3	MULTI	HCD	FTMS	0	0	0	-1	0	0	0	0	2				NaN	1	NaN	NaN	NaN	NaN	1729	0	1	2598	4327
20140904-PurClathDigest-1ug-01	4330	37.248	27.379	1023100	0	NaN	113580	0.38	-	-1		0	131	1194.48031386228	2386.94607479135	2	MULTI	HCD	FTMS	0	0	0	-1	0	0	0	0	3				NaN	1	NaN	NaN	NaN	NaN	1730	0	1	2598	4327
20140904-PurClathDigest-1ug-01	4331	37.252	16.848	794150	0	NaN	79599	0.36	+	3377	QFQDAGHFDAENIKK	15	87	437.715348789455	1746.83228929142	4	MULTI	HCD	FTMS	0	0	0	-1	0	0	0	0	4	Unmodified	_QFQDAGHFDAENIKK_	E1BFB0	69.9442977905273	1	NaN	NaN	NaN	NaN	1731	0	1	2598	4327
20140904-PurClathDigest-1ug-01	4332	37.255	29.916	3753000	0	NaN	526580	0.36	-	-1		0	93	305.636199033044	609.257845132888	2	MULTI	HCD	FTMS	0	0	0	-1	0	0	0	0	5				NaN	1	NaN	NaN	NaN	NaN	1732	0	1	2598	4327
20140904-PurClathDigest-1ug-01	4333	37.258	37.958	2133000	0	NaN	243710	0.38	+	4649	VHQLYETIQR	10	131	643.846313143882	1285.67807335456	2	MULTI	HCD	FTMS	0	0	0	-1	0	0	0	0	6	Unmodified	_VHQLYETIQR_	Q3ZCF0	151.089401245117	1	NaN	NaN	NaN	NaN	1733	0	1	2598	4327
20140904-PurClathDigest-1ug-01	4334	37.261	28.454	149790	0	NaN	27883	0.37	+	4650	VHQLYETIQR	10	35	429.566427463104	1285.67745298951	3	MULTI	HCD	FTMS	0	0	0	-1	0	0	0	0	7	Unmodified	_VHQLYETIQR_	Q3ZCF0	72.817626953125	1	NaN	NaN	NaN	NaN	1734	0	1	2598	4327
20140904-PurClathDigest-1ug-01	4336	37.273	7.232	4027100	0	NaN	403440	0.38	-	-1		0	118	543.997864434293	2171.96235187077	4	MULTI	HCD	FTMS	0	0	0	-1	0	0	0	0	1				NaN	1	NaN	NaN	NaN	NaN	1735	0	1	2599	4335
20140904-PurClathDigest-1ug-01	4337	37.276	24.198	2050100	0	NaN	368550	0.37	+	4482	VDKLDASESLR	11	115	616.827114476943	1231.63967602069	2	MULTI	HCD	FTMS	0	0	0	-1	0	0	0	0	2	Unmodified	_VDKLDASESLR_	P49951;F1MPU0	137.043106079102	1	NaN	NaN	NaN	NaN	1736	0	1	2599	4335
20140904-PurClathDigest-1ug-01	4338	37.279	9.58	1376900	0	NaN	113550	0.36	-	-1		0	75	571.075400224625	2850.34061879012	5	MULTI	HCD	FTMS	0	0	0	-1	0	0	0	0	3				NaN	1	NaN	NaN	NaN	NaN	1737	0	1	2599	4335
20140904-PurClathDigest-1ug-01	4339	37.282	35.059	747400	0	NaN	38199	0.38	-	-1		0	110	601.36865042426	1200.72274791532	2	MULTI	HCD	FTMS	0	0	0	-1	0	0	0	0	4				NaN	1	NaN	NaN	NaN	NaN	1738	0	1	2599	4335
20140904-PurClathDigest-1ug-01	4340	37.286	39.454	55783	0	NaN	13619	0.39	-	-1		0	30	790.800948796519	1579.58734465984	2	MULTI	HCD	FTMS	0	0	0	-1	0	0	0	0	5				NaN	1	NaN	NaN	NaN	NaN	1739	0	1	2599	4335
20140904-PurClathDigest-1ug-01	4341	37.289	25.691	1716600	0	NaN	156300	0.37	+	3682	SAAGSSSGFHSWAR	14	116	469.884938362646	1406.63298568814	3	MULTI	HCD	FTMS	0	0	0	-1	0	0	0	0	6	Unmodified	_SAAGSSSGFHSWAR_	F1MSQ6	139.07389831543	1	NaN	NaN	NaN	NaN	1740	0	1	2599	4335
20140904-PurClathDigest-1ug-01	4342	37.292	16.78	754490	0	NaN	146030	0.36	-	-1		0	63	435.399463626229	2171.96093579815	5	MULTI	HCD	FTMS	0	0	0	-1	0	0	0	0	7				NaN	1	NaN	NaN	NaN	NaN	1741	0	1	2599	4335
20140904-PurClathDigest-1ug-01	4344	37.304	23.61	1851200	0	NaN	204580	0.4	+	2425	LASYLDK	7	65	405.223748056667	808.432943180134	2	MULTI	HCD	FTMS	0	0	0	-1	0	0	0	0	1	Unmodified	_LASYLDK_	CON__A2A4G1;CON__P02533;CON__P19001;CON__P35527;CON__Q04695;CON__Q99456;F1MJ66;P06394;CON__P05784;CON__P08727;CON__P08779;F1MC11;G3MX98;G3X7W8;A1L595;A6QNZ7;CON__P08730-1;CON__P13645;CON__P19012;CON__Q9QWL7	92.3892517089844	1	NaN	NaN	NaN	NaN	1742	0	1	2600	4343
20140904-PurClathDigest-1ug-01	4345	37.307	26.192	2299600	0	NaN	403220	0.37	-	-1		0	110	731.348329482424	1460.68210603165	2	MULTI	HCD	FTMS	0	0	0	-1	0	0	0	0	2				NaN	1	NaN	NaN	NaN	NaN	1743	0	1	2600	4343
20140904-PurClathDigest-1ug-01	4346	37.311	30.096	1673900	0	NaN	185880	0.38	-	-1		0	89	533.792421239428	1065.57028954566	2	MULTI	HCD	FTMS	0	0	0	-1	0	0	0	0	3				NaN	1	NaN	NaN	NaN	NaN	1744	0	1	2600	4343
20140904-PurClathDigest-1ug-01	4347	37.314	22.126	1577200	0	NaN	132710	0.37	-	-1		0	106	487.901717606809	1460.68332342063	3	MULTI	HCD	FTMS	0	0	0	-1	0	0	0	0	4				NaN	1	NaN	NaN	NaN	NaN	1745	0	1	2600	4343
20140904-PurClathDigest-1ug-01	4348	37.317	30.64	565870	0	NaN	38575	0.38	-	-1		0	115	524.264062911892	1569.77035933588	3	MULTI	HCD	FTMS	0	0	0	-1	0	0	0	0	5				NaN	1	NaN	NaN	NaN	NaN	1746	0	1	2600	4343
20140904-PurClathDigest-1ug-01	4349	37.32	37.208	1651400	0	NaN	259100	0.38	-	-1		0	71	408.197004916629	814.379456900057	2	MULTI	HCD	FTMS	0	0	0	-1	0	0	0	0	6				NaN	1	NaN	NaN	NaN	NaN	1747	0	1	2600	4343
20140904-PurClathDigest-1ug-01	4350	37.324	45.3	1132000	0	NaN	159240	0.39	-	-1		0	105	459.247522836943	NaN	0	PEAK	HCD	FTMS	0	0	0	-1	0	0	0	0	7				NaN	1	NaN	NaN	NaN	NaN	1748	0	1	2600	4343
20140904-PurClathDigest-1ug-01	4352	37.335	10.956	4472000	0	NaN	339030	0.4	+	3683	SAAGSSSGFHSWAR	14	128	704.323242090159	1406.63193124712	2	MULTI	HCD	FTMS	0	0	0	-1	0	0	0	0	1	Unmodified	_SAAGSSSGFHSWAR_	F1MSQ6	282.420104980469	1	NaN	NaN	NaN	NaN	1749	0	1	2601	4351
20140904-PurClathDigest-1ug-01	4353	37.339	12.738	4303900	0	NaN	749900	0.36	-	-1		0	107	731.348329482424	1460.68210603165	2	MULTI	HCD	FTMS	0	0	0	-1	0	0	0	0	2				NaN	1	NaN	NaN	NaN	NaN	1750	0	1	2601	4351
20140904-PurClathDigest-1ug-01	4354	37.342	10.338	3246600	0	NaN	354430	0.36	-	-1		0	129	596.935766299026	1787.78546949728	3	MULTI	HCD	FTMS	0	0	0	-1	0	0	0	0	3				NaN	1	NaN	NaN	NaN	NaN	1751	0	1	2601	4351
20140904-PurClathDigest-1ug-01	4355	37.345	11.974	1190000	0	NaN	77961	0.36	-	-1		0	93	903.738022794834	2708.1922389847	3	MULTI	HCD	FTMS	0	0	0	-1	0	0	0	0	4				NaN	1	NaN	NaN	NaN	NaN	1752	0	1	2601	4351
20140904-PurClathDigest-1ug-01	4356	37.348	29.127	1653300	0	NaN	200910	0.38	-	-1		0	173	894.900249866662	1787.78594680012	2	MULTI	HCD	FTMS	0	0	0	-1	0	0	0	0	5				NaN	1	NaN	NaN	NaN	NaN	1753	0	1	2601	4351
20140904-PurClathDigest-1ug-01	4357	37.351	27.883	1444400	0	NaN	88377	0.38	-	-1		0	161	608.633511717953	1822.87870575406	3	MULTI	HCD	FTMS	0	0	0	-1	0	0	0	0	6				NaN	1	NaN	NaN	NaN	NaN	1754	0	1	2601	4351
20140904-PurClathDigest-1ug-01	4358	37.354	32.44	1260100	0	NaN	107390	0.37	-	-1		0	109	401.248358403478	1200.72324581063	3	MULTI	HCD	FTMS	0	0	0	-1	0	0	0	0	7				NaN	1	NaN	NaN	NaN	NaN	1755	0	1	2601	4351
20140904-PurClathDigest-1ug-01	4360	37.366	4.19	8041500	0	NaN	1427700	0.4	+	1838	IYIDSNNNPER	11	71	668.312866474	1334.6111800148	2	MULTI	HCD	FTMS	0	0	0	-1	0	0	0	0	1	Deamidation (NQ)	_IYIDSN(de)NNPER_	P49951;F1MPU0	178.896606445313	1	NaN	NaN	NaN	NaN	1756	0	1	2602	4359
20140904-PurClathDigest-1ug-01	4361	37.369	14.092	4360200	0	NaN	495390	0.36	-	-1		0	90	490.258518383059	978.502483832917	2	MULTI	HCD	FTMS	0	0	0	-1	0	0	0	0	2				NaN	1	NaN	NaN	NaN	NaN	1757	0	1	2602	4359
20140904-PurClathDigest-1ug-01	4362	37.372	11.006	2398600	0	NaN	240180	0.36	-	-1		0	110	447.953767790076	NaN	0	PEAK	HCD	FTMS	0	0	0	-1	0	0	0	0	3				NaN	1	NaN	NaN	NaN	NaN	1758	0	1	2602	4359
20140904-PurClathDigest-1ug-01	4363	37.375	16.271	2209000	0	NaN	193930	0.36	+	4492	VDKLDASESLR	11	97	411.554129254164	1231.64055836269	3	MULTI	HCD	FTMS	0	0	0	-1	0	0	0	0	4	Unmodified	_VDKLDASESLR_	P49951;F1MPU0	141.998092651367	1	NaN	NaN	NaN	NaN	1759	0	1	2602	4359
20140904-PurClathDigest-1ug-01	4364	37.378	18.169	2645200	0	NaN	283920	0.36	-	-1		0	140	381.442816502671	1521.74216014428	4	MULTI	HCD	FTMS	0	0	0	-1	0	0	0	0	5				NaN	1	NaN	NaN	NaN	NaN	1760	0	1	2602	4359
20140904-PurClathDigest-1ug-01	4365	37.381	33.6	2297500	0	NaN	353810	0.38	-	-1		0	81	485.294471732323	484.287195265723	1	MULTI	HCD	FTMS	0	0	0	-1	0	0	0	0	6				NaN	1	NaN	NaN	NaN	NaN	1761	0	1	2602	4359
20140904-PurClathDigest-1ug-01	4366	37.385	20.705	3390100	0	NaN	221810	0.37	+	4852	VVGAMQLYSVDRK	13	143	494.597390489378	1480.77034206833	3	MULTI	HCD	FTMS	0	0	0	-1	0	0	0	0	7	Oxidation (M)	_VVGAM(ox)QLYSVDRK_	P49951;F1MPU0	83.5337982177734	1	NaN	NaN	NaN	NaN	1762	0	1	2602	4359
20140904-PurClathDigest-1ug-01	4368	37.396	8.57	3729300	0	NaN	123580	0.4	+	1949	KEDIAINGEVEGKEEEQETK	20	151	759.363607590628	2275.06899337208	3	MULTI	HCD	FTMS	0	0	0	-1	0	0	0	0	1	Deamidation (NQ)	_KEDIAIN(de)GEVEGKEEEQETK_	F1MDZ2;O77788	176.847106933594	1	NaN	NaN	NaN	NaN	1763	0	1	2603	4367
20140904-PurClathDigest-1ug-01	4369	37.399	13.003	2072400	0	NaN	162630	0.36	-	-1		0	126	586.613658962966	1756.8191474891	3	MULTI	HCD	FTMS	0	0	0	-1	0	0	0	0	2				NaN	1	NaN	NaN	NaN	NaN	1764	0	1	2603	4367
20140904-PurClathDigest-1ug-01	4370	37.402	12.509	2959600	0	NaN	305940	0.36	-	-1		0	146	498.919537119066	1493.7367819574	3	MULTI	HCD	FTMS	0	0	0	-1	0	0	0	0	3				NaN	1	NaN	NaN	NaN	NaN	1765	0	1	2603	4367
20140904-PurClathDigest-1ug-01	4371	37.405	24.262	1143700	0	NaN	142070	0.37	-	-1		0	121	747.875400736898	1493.7362485406	2	MULTI	HCD	FTMS	0	0	0	-1	0	0	0	0	4				NaN	1	NaN	NaN	NaN	NaN	1766	0	1	2603	4367
20140904-PurClathDigest-1ug-01	4372	37.408	25.128	1052700	0	NaN	213660	0.37	+	3339	PISADSAIMNPASK	14	103	709.352984910251	1416.6914168873	2	MULTI	HCD	FTMS	0	0	0	-1	0	0	0	0	5	Oxidation (M)	_PISADSAIM(ox)NPASK_	P49951;F1MPU0	162.293502807617	1	NaN	NaN	NaN	NaN	1767	0	1	2603	4367
20140904-PurClathDigest-1ug-01	4373	37.412	25.431	1398800	0	NaN	162280	0.37	+	4205	TGAEGAVLDEAK	12	111	580.793619534986	1159.57268613677	2	MULTI	HCD	FTMS	0	0	0	-1	0	0	0	0	6	Unmodified	_TGAEGAVLDEAK_	F1MZB0;F1N1G7;F6RAG5	131.022003173828	1	NaN	NaN	NaN	NaN	1768	0	1	2603	4367
20140904-PurClathDigest-1ug-01	4374	37.415	16.604	382430	0	NaN	29149	0.37	-	-1		0	64	795.383509451001	3177.5049319376	4	MULTI	HCD	FTMS	0	0	0	-1	0	0	0	0	7				NaN	1	NaN	NaN	NaN	NaN	1769	0	1	2603	4367
20140904-PurClathDigest-1ug-01	4376	37.426	13.099	1100900	0	NaN	87706	0.38	-	-1		0	95	569.775091964185	2275.07126199034	4	MULTI	HCD	FTMS	0	0	0	-1	0	0	0	0	1				NaN	1	NaN	NaN	NaN	NaN	1770	0	1	2604	4375
20140904-PurClathDigest-1ug-01	4377	37.43	19.623	1037500	0	NaN	42763	0.37	+	1950	KEDIAINGEVEGKEEEQETK	20	112	1138.54260558721	2275.07065824122	2	MULTI	HCD	FTMS	0	0	0	-1	0	0	0	0	2	Deamidation (NQ)	_KEDIAIN(de)GEVEGKEEEQETK_	F1MDZ2;O77788	168.38200378418	1	NaN	NaN	NaN	NaN	1771	0	1	2604	4375
20140904-PurClathDigest-1ug-01	4378	37.433	25.743	1717100	0	NaN	54053	0.37	+	4664	VKDDIESLHDKFK	13	139	525.279276747573	1572.81600084292	3	MULTI	HCD	FTMS	0	0	0	-1	0	0	0	0	3	Unmodified	_VKDDIESLHDKFK_	E1BDX8	58.1116600036621	1	NaN	NaN	NaN	NaN	1772	0	1	2604	4375
20140904-PurClathDigest-1ug-01	4379	37.436	25.476	1914600	0	NaN	229260	0.37	-	-1		0	139	374.44128605761	1493.73603836404	4	MULTI	HCD	FTMS	0	0	0	-1	0	0	0	0	4				NaN	1	NaN	NaN	NaN	NaN	1773	0	1	2604	4375
20140904-PurClathDigest-1ug-01	4380	37.439	46.44	887270	0	NaN	50220	0.39	+	1098	FGDPVVQSDMK	11	100	619.788918037351	1237.5632831415	2	MULTI	HCD	FTMS	0	0	0	-1	0	0	0	0	5	Oxidation (M)	_FGDPVVQSDM(ox)K_	Q27965;Q27975	86.9353637695313	1	NaN	NaN	NaN	NaN	1774	0	1	2604	4375
20140904-PurClathDigest-1ug-01	4381	37.443	31.29	571290	0	NaN	348530	0.38	-	-1		0	58	1016.84091277862	NaN	0	PEAK	HCD	FTMS	0	0	0	-1	0	0	0	0	6				NaN	1	NaN	NaN	NaN	NaN	1775	0	1	2604	4375
20140904-PurClathDigest-1ug-01	4382	37.446	63.258	781990	0	NaN	53117	0.41	-	-1		0	165	697.582786260229	2786.30203917451	4	MULTI	HCD	FTMS	0	0	0	-1	0	0	0	0	7				NaN	1	NaN	NaN	NaN	NaN	1776	0	1	2604	4375
20140904-PurClathDigest-1ug-01	4384	37.458	4.445	2856500	0	NaN	162870	0.38	-	-1		0	96	610.306611141167	3046.49667337284	5	MULTI	HCD	FTMS	0	0	0	-1	0	0	0	0	1				NaN	1	NaN	NaN	NaN	NaN	1777	0	1	2605	4383
20140904-PurClathDigest-1ug-01	4385	37.462	23.029	2707300	0	NaN	379590	0.37	+	4980	YEEEVLSR	8	106	512.750937187604	1023.48732144201	2	MULTI	HCD	FTMS	0	0	0	-1	0	0	0	0	2	Unmodified	_YEEEVLSR_	P02548	113.057098388672	1	NaN	NaN	NaN	NaN	1778	0	1	2605	4383
20140904-PurClathDigest-1ug-01	4386	37.465	15.803	1180400	0	NaN	54108	0.36	+	4665	VKDDIESLHDKFK	13	95	394.210982701971	1572.81482494149	4	MULTI	HCD	FTMS	0	0	0	-1	0	0	0	0	3	Unmodified	_VKDDIESLHDKFK_	E1BDX8	40.4633712768555	1	NaN	NaN	NaN	NaN	1779	0	1	2605	4383
20140904-PurClathDigest-1ug-01	4387	37.468	20.229	2346400	0	NaN	115320	0.37	-	-1		0	127	544.581985717951	1630.72412775405	3	MULTI	HCD	FTMS	0	0	0	-1	0	0	0	0	4				NaN	1	NaN	NaN	NaN	NaN	1780	0	1	2605	4383
20140904-PurClathDigest-1ug-01	4388	37.471	31.304	1937500	0	NaN	114800	0.38	+	2937	LTGGANWQPK	10	133	536.283211281836	1070.55186963047	2	MULTI	HCD	FTMS	0	0	0	-1	0	0	0	0	5	Unmodified	_LTGGANWQPK_	F1MGT4	88.0182495117188	1	NaN	NaN	NaN	NaN	1781	0	1	2605	4383
20140904-PurClathDigest-1ug-01	4389	37.474	40.177	49766	0	NaN	5818	0.39	-	-1		0	32	676.825908890456	1351.63726484771	2	MULTI	HCD	FTMS	0	0	0	-1	0	0	0	0	6				NaN	1	NaN	NaN	NaN	NaN	1782	0	1	2605	4383
20140904-PurClathDigest-1ug-01	4390	37.477	46.617	962640	0	NaN	107260	0.4	-	-1		0	156	786.913879414972	1571.81320589674	2	MULTI	HCD	FTMS	0	0	0	-1	0	0	0	0	7				NaN	1	NaN	NaN	NaN	NaN	1783	0	1	2605	4383
20140904-PurClathDigest-1ug-01	4392	37.489	14.547	4734500	0	NaN	926950	0.4	+	1147	FSPEVPGQK	9	93	494.758480349356	987.502407765512	2	MULTI	HCD	FTMS	0	0	0	-1	0	0	0	0	1	Unmodified	_FSPEVPGQK_	F1N1S2	80.721549987793	1	NaN	NaN	NaN	NaN	1784	0	1	2606	4391
20140904-PurClathDigest-1ug-01	4393	37.493	9.485	5159800	0	NaN	776380	0.36	-	-1		0	151	615.971116320259	1844.89151956098	3	MULTI	HCD	FTMS	0	0	0	-1	0	0	0	0	2				NaN	1	NaN	NaN	NaN	NaN	1785	0	1	2606	4391
20140904-PurClathDigest-1ug-01	4394	37.496	15.431	2365800	0	NaN	114000	0.35	-	-1		0	144	746.864195476155	2983.42767603822	4	MULTI	HCD	FTMS	0	0	0	-1	0	0	0	0	3				NaN	1	NaN	NaN	NaN	NaN	1786	0	1	2606	4391
20140904-PurClathDigest-1ug-01	4395	37.499	23.109	2940800	0	NaN	478520	0.37	-	-1		0	108	535.233415209921	1068.45227748664	2	MULTI	HCD	FTMS	0	0	0	-1	0	0	0	0	4				NaN	1	NaN	NaN	NaN	NaN	1787	0	1	2606	4391
20140904-PurClathDigest-1ug-01	4396	37.502	17.862	2569500	0	NaN	264940	0.37	-	-1		0	161	697.582786260229	2786.30203917451	4	MULTI	HCD	FTMS	0	0	0	-1	0	0	0	0	5				NaN	1	NaN	NaN	NaN	NaN	1788	0	1	2606	4391
20140904-PurClathDigest-1ug-01	4397	37.505	32.658	1645200	0	NaN	328620	0.37	-	-1		0	70	391.268585041008	780.522617148816	2	MULTI	HCD	FTMS	0	0	0	-1	0	0	0	0	6				NaN	1	NaN	NaN	NaN	NaN	1789	0	1	2606	4391
20140904-PurClathDigest-1ug-01	4398	37.508	21.638	6338900	0	NaN	711420	0.36	-	-1		0	208	462.230937621078	1844.89464461791	4	MULTI	HCD	FTMS	0	0	0	-1	0	0	0	0	7				NaN	1	NaN	NaN	NaN	NaN	1790	0	1	2606	4391
20140904-PurClathDigest-1ug-01	4400	37.519	3.761	3046100	0	NaN	150670	0.4	-	-1		0	106	885.420130107752	3537.65141456461	4	MULTI	HCD	FTMS	0	0	0	-1	0	0	0	0	1				NaN	1	NaN	NaN	NaN	NaN	1791	0	1	2607	4399
20140904-PurClathDigest-1ug-01	4401	37.523	8.258	1000300	0	NaN	187460	0.36	-	-1		0	58	929.773620740981	2786.29903282314	3	MULTI	HCD	FTMS	0	0	0	-1	0	0	0	0	2				NaN	1	NaN	NaN	NaN	NaN	1792	0	1	2607	4399
20140904-PurClathDigest-1ug-01	4402	37.526	9.953	4635600	0	NaN	619260	0.36	-	-1		0	162	653.29864179457	2609.16546131188	4	MULTI	HCD	FTMS	0	0	0	-1	0	0	0	0	3				NaN	1	NaN	NaN	NaN	NaN	1793	0	1	2607	4399
20140904-PurClathDigest-1ug-01	4403	37.529	18.203	4066200	0	NaN	527850	0.36	-	-1		0	114	483.739765559391	965.464978185582	2	MULTI	HCD	FTMS	0	0	0	-1	0	0	0	0	4				NaN	1	NaN	NaN	NaN	NaN	1794	0	1	2607	4399
20140904-PurClathDigest-1ug-01	4404	37.532	20.209	13021000	0	NaN	1624600	0.37	-	-1		0	135	739.346351748379	1476.67815056356	2	MULTI	HCD	FTMS	0	0	0	-1	0	0	0	0	5				NaN	1	NaN	NaN	NaN	NaN	1795	0	1	2607	4399
20140904-PurClathDigest-1ug-01	4405	37.535	16.466	6493300	0	NaN	462510	0.36	+	1597	IKEWYEK	7	121	332.51164536041	994.513106681431	3	MULTI	HCD	FTMS	0	0	0	-1	0	0	0	0	6	Unmodified	_IKEWYEK_	P06394;A6QNZ7;CON__P02535-1;CON__P13645;F1MFW9	53.424259185791	1	NaN	NaN	NaN	NaN	1796	0	1	2607	4399
20140904-PurClathDigest-1ug-01	4406	37.538	17.104	2273400	0	NaN	235760	0.37	-	-1		0	123	870.729069797617	2609.16537999305	3	MULTI	HCD	FTMS	0	0	0	-1	0	0	0	0	7				NaN	1	NaN	NaN	NaN	NaN	1797	0	1	2607	4399
[truncated: 17,708 more rows]
