# Supplementary material for: The ∼16 kDa C-Terminal Sequence of Clathrin Assembly Protein AP180 Is Essential for Efficient Clathrin Binding
Source: PLoS One. 2014 Oct 20;9(10):e110557. doi: 10.1371/journal.pone.0110557 (PMC4203807; doi:10.1371/journal.pone.0110557)
Supplement: Data S2 — Contains the tabulated output of the MaxQuant software from processing the LC-MS/MS data of the tryptic digestion of purified clathrin. (ZIP) [file pone.0110557.s003.zip › txt/msScans.txt]

Raw file	Scan number	Scan index	Retention time	Cycle time	Ion injection time	Basepeak intensity	Total ion current	MS/MS count	Mass calibration	Experiment	Peak length	Isotope pattern length	Multiplet length	Peaks / s	Single peaks / s	Isotope patterns / s	Single isotope patterns / s	Multiplets / s	Identified multiplets / s	Multiplet identification rate [%]	MS/MS / s	Identified MS/MS / s	MS/MS identification rate [%]	Intens Comp Factor	CTCD Comp	RawOvFtT	AGC Fill
20140904-PurClathDigest-1ug-01	1	0	0.007285	0.6665	215.15	380370	3031600	0	-5.3024	1	5.03	15.24	15.24	39.46	36.89	1.203	0	1.203	0	0	0	0		NaN	NaN	NaN	NaN
20140904-PurClathDigest-1ug-01	2	1	0.018393	0.6801	217.94	352350	3001000	0	-5.3024	1	5.039	15.34	15.34	39.49	36.93	1.201	0	1.201	0	0	0	0		NaN	NaN	NaN	NaN
20140904-PurClathDigest-1ug-01	3	2	0.029728	0.69	229.32	312150	2830300	0	-5.3024	1	5.047	15.45	15.45	39.53	36.97	1.199	0	1.199	0	0	0	0		NaN	NaN	NaN	NaN
20140904-PurClathDigest-1ug-01	4	3	0.041228	0.67	209.15	336170	2945300	0	-5.3024	1	5.056	15.56	15.56	39.56	37	1.198	0	1.198	0	0	0	0		NaN	NaN	NaN	NaN
20140904-PurClathDigest-1ug-01	5	4	0.052395	0.6699	209.9	341510	3045300	0	-5.3024	1	5.064	15.66	15.66	39.59	37.04	1.196	0	1.196	0	0	0	0		NaN	NaN	NaN	NaN
20140904-PurClathDigest-1ug-01	6	5	0.06356	0.6703	206.69	326010	2971500	0	-5.3024	1	5.072	15.77	15.77	39.62	37.07	1.194	0	1.194	0	0	0	0		NaN	NaN	NaN	NaN
20140904-PurClathDigest-1ug-01	7	6	0.074732	0.6697	209.76	355950	3042500	0	-5.3024	1	5.081	15.87	15.87	39.66	37.11	1.192	0	1.192	0	0	0	0		NaN	NaN	NaN	NaN
20140904-PurClathDigest-1ug-01	8	7	0.085893	0.6601	205.14	345220	3059500	0	-5.3024	1	5.089	15.98	15.98	39.69	37.14	1.191	0	1.191	0	0	0	0		NaN	NaN	NaN	NaN
20140904-PurClathDigest-1ug-01	9	8	0.096895	0.66	193.68	415560	3338600	0	-5.3024	1	5.097	16.08	16.08	39.72	37.18	1.189	0	1.189	0	0	0	0		NaN	NaN	NaN	NaN
20140904-PurClathDigest-1ug-01	10	9	0.1079	0.65	194.29	403750	3289600	0	-5.3024	1	5.105	16.19	16.19	39.75	37.21	1.187	0	1.187	0	0	0	0		NaN	NaN	NaN	NaN
20140904-PurClathDigest-1ug-01	11	10	0.11873	0.6401	179.62	394870	3314300	0	-5.3024	1	5.113	16.29	16.29	39.78	37.25	1.185	0	1.185	0	0	0	0		NaN	NaN	NaN	NaN
20140904-PurClathDigest-1ug-01	12	11	0.1294	0.6399	182.62	409210	3352700	0	-5.3024	1	5.121	16.39	16.39	39.82	37.28	1.184	0	1.184	0	0	0	0		NaN	NaN	NaN	NaN
20140904-PurClathDigest-1ug-01	13	12	0.14006	0.6399	174.62	426280	3462800	0	-5.3024	1	5.129	16.49	16.49	39.85	37.32	1.182	0	1.182	0	0	0	0		NaN	NaN	NaN	NaN
20140904-PurClathDigest-1ug-01	14	13	0.15073	0.64	177.44	389700	3361700	0	-5.3024	1	5.137	16.59	16.59	39.88	37.35	1.18	0	1.18	0	0	0	0		NaN	NaN	NaN	NaN
20140904-PurClathDigest-1ug-01	15	14	0.16139	0.6501	187.01	423160	3381800	0	-5.3024	1	5.145	16.69	16.69	39.91	37.38	1.179	0	1.179	0	0	0	0		NaN	NaN	NaN	NaN
20140904-PurClathDigest-1ug-01	16	15	0.17223	0.65	187.08	383420	3315200	0	-5.3024	1	5.153	16.79	16.79	39.94	37.42	1.177	0	1.177	0	0	0	0		NaN	NaN	NaN	NaN
20140904-PurClathDigest-1ug-01	17	16	0.18306	0.65	190.99	397520	3325900	0	-5.3024	1	5.161	16.89	16.89	39.97	37.45	1.175	0	1.175	0	0	0	0		NaN	NaN	NaN	NaN
20140904-PurClathDigest-1ug-01	18	17	0.19389	0.6699	208.59	383850	3173900	0	-5.3024	1	5.169	17	17	40	37.49	1.174	0	1.174	0	0	0	0		NaN	NaN	NaN	NaN
20140904-PurClathDigest-1ug-01	19	18	0.20506	0.65	187.08	423190	3359200	0	-5.3024	1	5.177	17.1	17.1	40.03	37.52	1.172	0	1.172	0	0	0	0		NaN	NaN	NaN	NaN
20140904-PurClathDigest-1ug-01	20	19	0.21589	0.66	201.04	347900	3089000	0	-5.3024	1	5.185	17.2	17.2	40.07	37.56	1.17	0	1.17	0	0	0	0		NaN	NaN	NaN	NaN
20140904-PurClathDigest-1ug-01	21	20	0.22689	0.6801	220.22	334590	2919100	0	-5.3024	1	5.194	17.31	17.31	40.1	37.59	1.168	0	1.168	0	0	0	0		NaN	NaN	NaN	NaN
20140904-PurClathDigest-1ug-01	22	21	0.23823	0.6599	197.21	353260	3118700	0	-5.3024	1	5.202	17.41	17.41	40.13	37.63	1.167	0	1.167	0	0	0	0		NaN	NaN	NaN	NaN
20140904-PurClathDigest-1ug-01	23	22	0.24923	0.6801	215.79	368560	3004400	0	-5.3024	1	5.21	17.52	17.52	40.16	37.66	1.165	0	1.165	0	0	0	0		NaN	NaN	NaN	NaN
20140904-PurClathDigest-1ug-01	24	23	0.26056	0.66	201.05	322610	2991600	0	-5.3024	1	5.219	17.62	17.62	40.2	37.7	1.163	0	1.163	0	0	0	0		NaN	NaN	NaN	NaN
20140904-PurClathDigest-1ug-01	25	24	0.27156	0.6499	188.87	327480	3074500	0	-5.3024	1	5.227	17.73	17.73	40.23	37.73	1.161	0	1.161	0	0	0	0		NaN	NaN	NaN	NaN
20140904-PurClathDigest-1ug-01	26	25	0.28239	0.62	161.91	442440	3562500	0	-5.3024	1	5.235	17.83	17.83	40.26	37.77	1.16	0	1.16	0	0	0	0		NaN	NaN	NaN	NaN
20140904-PurClathDigest-1ug-01	27	26	0.29273	0.6501	189.94	433250	3304500	0	-5.3024	1	5.242	17.93	17.93	40.29	37.8	1.158	0	1.158	0	0	0	0		NaN	NaN	NaN	NaN
20140904-PurClathDigest-1ug-01	28	27	0.30356	0.64	180.7	375800	3339600	0	-5.3024	1	5.25	18.03	18.03	40.32	37.83	1.156	0	1.156	0	0	0	0		NaN	NaN	NaN	NaN
20140904-PurClathDigest-1ug-01	29	28	0.31423	0.68	216.79	356920	3055500	0	-5.3024	1	5.258	18.13	18.13	40.35	37.87	1.155	0	1.155	0	0	0	0		NaN	NaN	NaN	NaN
20140904-PurClathDigest-1ug-01	30	29	0.32556	0.64	184.88	516860	3549800	0	-5.3024	1	5.267	18.24	18.24	40.38	37.9	1.153	0	1.153	0	0	0	0		NaN	NaN	NaN	NaN
20140904-PurClathDigest-1ug-01	31	30	0.33623	0.6599	200.14	362370	3197200	0	-5.3024	1	5.275	18.34	18.34	40.41	37.94	1.151	0	1.151	0	0	0	0		NaN	NaN	NaN	NaN
20140904-PurClathDigest-1ug-01	32	31	0.34723	0.69	221.77	359480	2998300	0	-5.3024	1	5.283	18.44	18.44	40.45	37.97	1.15	0	1.15	0	0	0	0		NaN	NaN	NaN	NaN
20140904-PurClathDigest-1ug-01	33	32	0.35873	0.65	189.81	421820	3302000	0	-5.3024	1	5.291	18.55	18.55	40.48	38.01	1.148	0	1.148	0	0	0	0		NaN	NaN	NaN	NaN
20140904-PurClathDigest-1ug-01	34	33	0.36956	0.6502	185.25	420610	3337800	0	-5.3024	1	5.3	18.65	18.65	40.51	38.04	1.146	0	1.146	0	0	0	0		NaN	NaN	NaN	NaN
20140904-PurClathDigest-1ug-01	35	34	0.3804	0.6699	208.59	379660	3162600	0	-5.3024	1	5.308	18.75	18.75	40.54	38.08	1.144	0	1.144	0	0	0	0		NaN	NaN	NaN	NaN
20140904-PurClathDigest-1ug-01	36	35	0.39156	0.6607	200.97	371600	3130300	0	-5.3024	1	5.316	18.86	18.86	40.58	38.11	1.143	0	1.143	0	0	0	0		NaN	NaN	NaN	NaN
20140904-PurClathDigest-1ug-01	37	36	0.40257	0.6294	171.55	404180	3635200	0	-5.3024	1	5.324	18.96	18.96	40.61	38.15	1.141	0	1.141	0	0	0	0		NaN	NaN	NaN	NaN
20140904-PurClathDigest-1ug-01	38	37	0.41306	0.6599	203.36	380710	3195300	0	-5.3024	1	5.332	19.06	19.06	40.64	38.18	1.139	0	1.139	0	0	0	0		NaN	NaN	NaN	NaN
20140904-PurClathDigest-1ug-01	39	38	0.42406	0.6499	187.84	398460	3357400	0	-5.3024	1	5.34	19.17	19.17	40.67	38.22	1.137	0	1.137	0	0	0	0		NaN	NaN	NaN	NaN
20140904-PurClathDigest-1ug-01	40	39	0.43489	0.6701	215.51	317010	2869100	0	-5.3024	1	5.348	19.27	19.27	40.7	38.25	1.136	0	1.136	0	0	0	0		NaN	NaN	NaN	NaN
20140904-PurClathDigest-1ug-01	41	40	0.44606	0.69	231.45	299910	2701600	0	-5.3024	1	5.356	19.37	19.37	40.73	38.29	1.134	0	1.134	0	0	0	0		NaN	NaN	NaN	NaN
20140904-PurClathDigest-1ug-01	42	41	0.45756	0.68	219.55	301950	2795600	0	-5.3024	1	5.368	19.53	19.53	40.77	38.32	1.134	0	1.134	0	0	0	0		NaN	NaN	NaN	NaN
20140904-PurClathDigest-1ug-01	43	42	0.46889	0.66	198.48	328020	2983600	0	-5.3024	1	5.381	19.72	19.72	40.8	38.35	1.135	0	1.135	0	0	0	0		NaN	NaN	NaN	NaN
20140904-PurClathDigest-1ug-01	44	43	0.47989	0.6699	206.95	343760	2959200	0	-5.3024	1	5.393	19.9	19.9	40.83	38.38	1.136	0	1.136	0	0	0	0		NaN	NaN	NaN	NaN
20140904-PurClathDigest-1ug-01	45	44	0.49106	0.68	216.61	322800	2881400	0	-5.3024	1	5.406	20.08	20.08	40.86	38.41	1.137	0	1.137	0	0	0	0		NaN	NaN	NaN	NaN
20140904-PurClathDigest-1ug-01	46	45	0.50239	0.68	219.55	339460	2927400	0	-5.3024	1	5.419	20.26	20.26	40.89	38.45	1.138	0	1.138	0	0	0	0		NaN	NaN	NaN	NaN
20140904-PurClathDigest-1ug-01	47	46	0.51373	0.6803	211.88	380350	3102200	0	-5.3024	1	5.432	20.45	20.45	40.92	38.48	1.138	0	1.138	0	0	0	0		NaN	NaN	NaN	NaN
20140904-PurClathDigest-1ug-01	48	47	0.52507	0.65	194.96	370420	3271200	0	-5.3024	1	5.445	20.63	20.63	40.96	38.51	1.139	0	1.139	0	0	0	0		NaN	NaN	NaN	NaN
20140904-PurClathDigest-1ug-01	49	48	0.5359	0.6699	213.63	359680	3024100	0	-5.3024	1	5.457	20.81	20.81	40.99	38.54	1.14	0	1.14	0	0	0	0		NaN	NaN	NaN	NaN
20140904-PurClathDigest-1ug-01	50	49	0.54706	0.6598	182.1	381400	3419800	0	-5.3024	1	5.47	20.99	20.99	41.02	38.57	1.141	0	1.141	0	0	0	0		NaN	NaN	NaN	NaN
20140904-PurClathDigest-1ug-01	51	50	0.55806	0.6601	200.13	338280	3120600	0	-5.3024	1	5.482	21.17	21.17	41.05	38.6	1.142	0	1.142	0	0	0	0		NaN	NaN	NaN	NaN
20140904-PurClathDigest-1ug-01	52	51	0.56906	0.6499	192.53	373950	3243900	0	-5.3024	1	5.495	21.35	21.35	41.08	38.63	1.143	0	1.143	0	0	0	0		NaN	NaN	NaN	NaN
20140904-PurClathDigest-1ug-01	53	52	0.57989	0.65	187.04	370170	3258100	0	-5.3024	1	5.507	21.52	21.52	41.11	38.66	1.144	0	1.144	0	0	0	0		NaN	NaN	NaN	NaN
20140904-PurClathDigest-1ug-01	54	53	0.59073	0.6703	203.91	363170	3226900	0	-5.3024	1	5.519	21.7	21.7	41.14	38.69	1.145	0	1.145	0	0	0	0		NaN	NaN	NaN	NaN
20140904-PurClathDigest-1ug-01	55	54	0.6019	0.65	191.77	418050	3493600	0	-5.3024	1	5.532	21.88	21.88	41.17	38.72	1.146	0	1.146	0	0	0	0		NaN	NaN	NaN	NaN
20140904-PurClathDigest-1ug-01	56	55	0.61273	0.65	190.68	422830	3564000	0	-5.3024	1	5.545	22.06	22.06	41.2	38.76	1.146	0	1.146	0	0	0	0		NaN	NaN	NaN	NaN
20140904-PurClathDigest-1ug-01	57	56	0.62357	0.6497	186.98	387130	3356100	0	-5.3024	1	5.557	22.23	22.23	41.24	38.79	1.147	0	1.147	0	0	0	0		NaN	NaN	NaN	NaN
20140904-PurClathDigest-1ug-01	58	57	0.63439	0.67	209.94	373170	3107500	0	-5.3024	1	5.569	22.41	22.41	41.27	38.82	1.148	0	1.148	0	0	0	0		NaN	NaN	NaN	NaN
20140904-PurClathDigest-1ug-01	59	58	0.64556	0.68	206.42	346130	3047500	0	-5.3024	1	5.582	22.59	22.59	41.3	38.85	1.149	0	1.149	0	0	0	0		NaN	NaN	NaN	NaN
20140904-PurClathDigest-1ug-01	60	59	0.65689	0.6501	186.83	438740	3390400	0	-5.3024	1	5.595	22.78	22.78	41.33	38.88	1.15	0	1.15	0	0	0	0		NaN	NaN	NaN	NaN
20140904-PurClathDigest-1ug-01	61	60	0.66773	0.63	175.67	362140	3225600	0	-5.3024	1	5.607	22.95	22.95	41.36	38.91	1.151	0	1.151	0	0	0	0		NaN	NaN	NaN	NaN
20140904-PurClathDigest-1ug-01	62	61	0.67823	0.69	208.42	360030	3109300	0	-5.3024	1	5.619	23.12	23.12	41.39	38.94	1.152	0	1.152	0	0	0	0		NaN	NaN	NaN	NaN
20140904-PurClathDigest-1ug-01	63	62	0.68973	0.6599	190.5	355700	3136400	0	-5.3024	1	5.632	23.31	23.31	41.42	38.97	1.153	0	1.153	0	0	0	0		NaN	NaN	NaN	NaN
20140904-PurClathDigest-1ug-01	64	63	0.70073	0.65	190.67	395310	3262000	0	-5.3024	1	5.645	23.49	23.49	41.45	39	1.153	0	1.153	0	0	0	0		NaN	NaN	NaN	NaN
20140904-PurClathDigest-1ug-01	65	64	0.71156	0.58	168.91	428800	3568200	0	-5.3024	1	5.657	23.66	23.66	41.48	39.03	1.154	0	1.154	0	0	0	0		NaN	NaN	NaN	NaN
20140904-PurClathDigest-1ug-01	66	65	0.72123	0.6801	194.78	383860	3311500	0	-5.3024	1	5.668	23.82	23.82	41.51	39.06	1.155	0	1.155	0	0	0	0		NaN	NaN	NaN	NaN
20140904-PurClathDigest-1ug-01	67	66	0.73256	0.65	188.49	386210	3326500	0	-5.3024	1	5.681	24.01	24.01	41.54	39.09	1.156	0	1.156	0	0	0	0		NaN	NaN	NaN	NaN
20140904-PurClathDigest-1ug-01	68	67	0.74339	0.65	194.76	386070	3287700	0	-5.3024	1	5.693	24.18	24.18	41.57	39.12	1.157	0	1.157	0	0	0	0		NaN	NaN	NaN	NaN
20140904-PurClathDigest-1ug-01	69	68	0.75423	0.64	182.86	467480	3606000	0	-5.3024	1	5.702	24.31	24.31	41.6	39.15	1.158	0	1.158	0	0	0	0		NaN	NaN	NaN	NaN
20140904-PurClathDigest-1ug-01	70	69	0.7649	0.6399	174.29	404990	3600200	0	-5.3024	1	5.705	24.34	24.34	41.63	39.16	1.161	0	1.161	0	0	0	0		NaN	NaN	NaN	NaN
20140904-PurClathDigest-1ug-01	71	70	0.77556	0.6501	191.24	374420	3463600	0	-5.3024	1	5.707	24.38	24.38	41.65	39.18	1.164	0	1.164	0	0	0	0		NaN	NaN	NaN	NaN
20140904-PurClathDigest-1ug-01	72	71	0.7864	0.65	192.01	428790	3444000	0	-5.3024	1	5.71	24.42	24.42	41.67	39.2	1.166	0	1.166	0	0	0	0		NaN	NaN	NaN	NaN
20140904-PurClathDigest-1ug-01	73	72	0.79723	0.64	177.08	401910	3588900	0	-5.3024	1	5.713	24.46	24.46	41.7	39.22	1.169	0	1.169	0	0	0	0		NaN	NaN	NaN	NaN
20140904-PurClathDigest-1ug-01	74	73	0.8079	0.64	179.27	390840	3457800	0	-5.3024	1	5.716	24.5	24.5	41.72	39.24	1.171	0	1.171	0	0	0	0		NaN	NaN	NaN	NaN
20140904-PurClathDigest-1ug-01	75	74	0.81856	0.65	189.72	356230	3283100	0	-5.3024	1	5.718	24.53	24.53	41.74	39.26	1.174	0	1.174	0	0	0	0		NaN	NaN	NaN	NaN
20140904-PurClathDigest-1ug-01	76	75	0.82939	0.6499	193.68	385380	3296700	0	-5.3024	1	5.721	24.57	24.57	41.77	39.28	1.177	0	1.177	0	0	0	0		NaN	NaN	NaN	NaN
20140904-PurClathDigest-1ug-01	77	76	0.84023	0.65	190.63	376960	3396300	0	-5.3024	1	5.724	24.61	24.61	41.79	39.3	1.179	0	1.179	0	0	0	0		NaN	NaN	NaN	NaN
20140904-PurClathDigest-1ug-01	78	77	0.85106	0.6201	153.99	548280	3945400	0	-5.3024	1	5.727	24.65	24.65	41.81	39.31	1.182	0	1.182	0	0	0	0		NaN	NaN	NaN	NaN
20140904-PurClathDigest-1ug-01	79	78	0.8614	0.6399	177.27	406640	3509900	0	-5.3024	1	5.729	24.69	24.69	41.84	39.33	1.184	0	1.184	0	0	0	0		NaN	NaN	NaN	NaN
20140904-PurClathDigest-1ug-01	80	79	0.87206	0.62	166.26	463580	3673400	0	-5.3024	1	5.732	24.72	24.72	41.86	39.35	1.187	0	1.187	0	0	0	0		NaN	NaN	NaN	NaN
20140904-PurClathDigest-1ug-01	81	80	0.88239	0.64	178.53	431050	3480800	0	-5.3024	1	5.735	24.76	24.76	41.88	39.37	1.19	0	1.19	0	0	0	0		NaN	NaN	NaN	NaN
20140904-PurClathDigest-1ug-01	82	81	0.89306	0.65	192.32	347010	3154300	0	-5.3024	1	5.737	24.8	24.8	41.9	39.39	1.192	0	1.192	0	0	0	0		NaN	NaN	NaN	NaN
20140904-PurClathDigest-1ug-01	83	82	0.90389	0.66	198.85	363830	3228400	0	-5.3024	1	5.74	24.84	24.84	41.93	39.41	1.195	0	1.195	0	0	0	0		NaN	NaN	NaN	NaN
20140904-PurClathDigest-1ug-01	84	83	0.91489	0.68	220.1	307970	2872000	0	-5.3024	1	5.743	24.88	24.88	41.95	39.42	1.197	0	1.197	0	0	0	0		NaN	NaN	NaN	NaN
20140904-PurClathDigest-1ug-01	85	84	0.92623	0.6701	212.71	316650	2922700	0	-5.3024	1	5.746	24.92	24.92	41.98	39.44	1.2	0	1.2	0	0	0	0		NaN	NaN	NaN	NaN
20140904-PurClathDigest-1ug-01	86	85	0.93739	0.6699	213.31	329130	2985000	0	-5.3024	1	5.749	24.96	24.96	42	39.46	1.203	0	1.203	0	0	0	0		NaN	NaN	NaN	NaN
20140904-PurClathDigest-1ug-01	87	86	0.94856	0.6701	207.17	324090	3122400	0	-5.3024	1	5.752	25	25	42.03	39.48	1.206	0	1.206	0	0	0	0		NaN	NaN	NaN	NaN
20140904-PurClathDigest-1ug-01	88	87	0.95973	0.6608	202.69	331260	3068800	0	-5.3024	1	5.755	25.04	25.04	42.05	39.5	1.208	0	1.208	0	0	0	0		NaN	NaN	NaN	NaN
20140904-PurClathDigest-1ug-01	89	88	0.97074	0.6491	192.01	369640	3236200	0	-5.3024	1	5.757	25.08	25.08	42.07	39.52	1.211	0	1.211	0	0	0	0		NaN	NaN	NaN	NaN
20140904-PurClathDigest-1ug-01	90	89	0.98156	0.6901	234.36	305050	2798100	0	-5.3024	1	5.76	25.11	25.11	42.1	39.54	1.214	0	1.214	0	0	0	0		NaN	NaN	NaN	NaN
20140904-PurClathDigest-1ug-01	91	90	0.99306	0.6499	187.81	355620	3165800	0	-5.3024	1	5.763	25.16	25.16	42.12	39.56	1.216	0	1.216	0	0	0	0		NaN	NaN	NaN	NaN
20140904-PurClathDigest-1ug-01	92	91	1.0039	0.68029	220.79	317820	2839400	0	-5.3024	1	5.766	25.19	25.19	42.15	39.58	1.219	0	1.219	0	0	0	0		NaN	NaN	NaN	NaN
20140904-PurClathDigest-1ug-01	93	92	1.0152	0.6698	212.75	339130	3037300	0	-5.3024	1	5.769	25.23	25.23	42.17	39.6	1.222	0	1.222	0	0	0	0		NaN	NaN	NaN	NaN
20140904-PurClathDigest-1ug-01	94	93	1.0264	0.67	203.87	321310	2927400	0	-5.3024	1	5.772	25.27	25.27	42.19	39.62	1.224	0	1.224	0	0	0	0		NaN	NaN	NaN	NaN
20140904-PurClathDigest-1ug-01	95	94	1.0376	0.64	178.8	507930	3503900	0	-5.3024	1	5.775	25.31	25.31	42.22	39.64	1.227	0	1.227	0	0	0	0		NaN	NaN	NaN	NaN
20140904-PurClathDigest-1ug-01	96	95	1.0482	0.67989	217.35	322610	2943700	0	-5.3024	1	5.777	25.35	25.35	42.24	39.66	1.23	0	1.23	0	0	0	0		NaN	NaN	NaN	NaN
20140904-PurClathDigest-1ug-01	97	96	1.0596	0.6601	199.78	353940	3139400	0	-5.3024	1	5.793	25.41	25.41	42.29	39.7	1.231	0	1.231	0	0	0	0		NaN	NaN	NaN	NaN
20140904-PurClathDigest-1ug-01	98	97	1.0706	0.6799	224.12	309200	2822000	0	-5.3024	1	5.811	25.46	25.46	42.34	39.74	1.232	0	1.232	0	0	0	0		NaN	NaN	NaN	NaN
20140904-PurClathDigest-1ug-01	99	98	1.0819	0.6501	194.48	356630	3268800	0	-5.3024	1	5.829	25.52	25.52	42.39	39.79	1.233	0	1.233	0	0	0	0		NaN	NaN	NaN	NaN
20140904-PurClathDigest-1ug-01	100	99	1.0927	0.66999	203.71	509360	3357200	0	-5.3024	1	5.847	25.58	25.58	42.44	39.83	1.234	0	1.234	0	0	0	0		NaN	NaN	NaN	NaN
20140904-PurClathDigest-1ug-01	101	100	1.1039	0.68	222.57	329940	2969600	0	-5.3024	1	5.865	25.64	25.64	42.49	39.88	1.234	0	1.234	0	0	0	0		NaN	NaN	NaN	NaN
20140904-PurClathDigest-1ug-01	102	101	1.1152	0.6699	212.03	327750	2967000	0	-5.3024	1	5.883	25.7	25.7	42.54	39.92	1.235	0	1.235	0	0	0	0		NaN	NaN	NaN	NaN
20140904-PurClathDigest-1ug-01	103	102	1.1264	0.6601	201.84	504890	3374000	0	-5.3024	1	5.901	25.75	25.75	42.59	39.97	1.236	0	1.236	0	0	0	0		NaN	NaN	NaN	NaN
20140904-PurClathDigest-1ug-01	104	103	1.1374	0.6499	189.96	362800	3337900	0	-5.3024	1	5.919	25.81	25.81	42.64	40.01	1.237	0	1.237	0	0	0	0		NaN	NaN	NaN	NaN
20140904-PurClathDigest-1ug-01	105	104	1.1482	0.6501	196.3	395150	3405200	0	-5.3024	1	5.936	25.87	25.87	42.69	40.05	1.238	0	1.238	0	0	0	0		NaN	NaN	NaN	NaN
20140904-PurClathDigest-1ug-01	106	105	1.1591	0.64	182.01	425580	3512200	0	-5.3024	1	5.954	25.92	25.92	42.74	40.1	1.239	0	1.239	0	0	0	0		NaN	NaN	NaN	NaN
20140904-PurClathDigest-1ug-01	107	106	1.1697	0.65	193.31	368670	3385100	0	-5.3024	1	5.971	25.98	25.98	42.79	40.14	1.24	0	1.24	0	0	0	0		NaN	NaN	NaN	NaN
20140904-PurClathDigest-1ug-01	108	107	1.1806	0.6599	203.47	350540	3187600	0	-5.3024	1	5.989	26.03	26.03	42.84	40.18	1.241	0	1.241	0	0	0	0		NaN	NaN	NaN	NaN
20140904-PurClathDigest-1ug-01	109	108	1.1916	0.6701	216.32	325100	2916300	0	-5.3024	1	6.006	26.09	26.09	42.89	40.23	1.241	0	1.241	0	0	0	0		NaN	NaN	NaN	NaN
20140904-PurClathDigest-1ug-01	110	109	1.2027	0.66989	212.63	329230	3056900	0	-5.3024	1	6.025	26.15	26.15	42.94	40.27	1.242	0	1.242	0	0	0	0		NaN	NaN	NaN	NaN
20140904-PurClathDigest-1ug-01	111	110	1.2139	0.6701	208.27	317380	2948900	0	-5.3024	1	6.043	26.2	26.2	42.99	40.32	1.243	0	1.243	0	0	0	0		NaN	NaN	NaN	NaN
20140904-PurClathDigest-1ug-01	112	111	1.2251	0.69	225.92	312840	2835200	0	-5.3024	1	6.061	26.26	26.26	43.04	40.36	1.244	0	1.244	0	0	0	0		NaN	NaN	NaN	NaN
20140904-PurClathDigest-1ug-01	113	112	1.2366	0.6802	215.36	319270	2879300	0	-5.3024	1	6.079	26.32	26.32	43.09	40.41	1.245	0	1.245	0	0	0	0		NaN	NaN	NaN	NaN
20140904-PurClathDigest-1ug-01	114	113	1.2479	0.6697	213.19	330890	3002700	0	-5.3024	1	6.098	26.38	26.38	43.14	40.45	1.246	0	1.246	0	0	0	0		NaN	NaN	NaN	NaN
20140904-PurClathDigest-1ug-01	115	114	1.2591	0.67	206.87	330010	2965700	0	-5.3024	1	6.116	26.44	26.44	43.19	40.5	1.247	0	1.247	0	0	0	0		NaN	NaN	NaN	NaN
20140904-PurClathDigest-1ug-01	116	115	1.2702	0.66	198.34	353230	3102100	0	-5.3024	1	6.134	26.5	26.5	43.24	40.54	1.248	0	1.248	0	0	0	0		NaN	NaN	NaN	NaN
20140904-PurClathDigest-1ug-01	117	116	1.2812	0.6801	222.71	310680	2872800	0	-5.3024	1	6.151	26.55	26.55	43.29	40.59	1.249	0	1.249	0	0	0	0		NaN	NaN	NaN	NaN
20140904-PurClathDigest-1ug-01	118	117	1.2926	0.68	219.88	326420	2894900	0	-5.3024	1	6.17	26.61	26.61	43.34	40.63	1.249	0	1.249	0	0	0	0		NaN	NaN	NaN	NaN
20140904-PurClathDigest-1ug-01	119	118	1.3039	0.6699	211.59	315400	2924600	0	-5.3024	1	6.188	26.67	26.67	43.39	40.68	1.25	0	1.25	0	0	0	0		NaN	NaN	NaN	NaN
20140904-PurClathDigest-1ug-01	120	119	1.3151	0.6801	223.45	306520	2842500	0	-5.3024	1	6.206	26.73	26.73	43.45	40.72	1.251	0	1.251	0	0	0	0		NaN	NaN	NaN	NaN
20140904-PurClathDigest-1ug-01	121	120	1.3264	0.68	219.37	306320	2827400	0	-5.3024	1	6.224	26.79	26.79	43.5	40.77	1.252	0	1.252	0	0	0	0		NaN	NaN	NaN	NaN
20140904-PurClathDigest-1ug-01	122	121	1.3377	0.69	225.15	295630	2826600	0	-5.3024	1	6.243	26.84	26.84	43.55	40.82	1.253	0	1.253	0	0	0	0		NaN	NaN	NaN	NaN
20140904-PurClathDigest-1ug-01	123	122	1.3492	0.6399	178.09	409140	3361100	0	-5.3024	1	6.261	26.9	26.9	43.6	40.86	1.254	0	1.254	0	0	0	0		NaN	NaN	NaN	NaN
20140904-PurClathDigest-1ug-01	124	123	1.3599	0.6201	163.82	493560	3809000	0	-5.3024	1	6.262	26.91	26.91	43.6	40.86	1.257	0	1.257	0	0	0	0		NaN	NaN	NaN	NaN
20140904-PurClathDigest-1ug-01	125	124	1.3702	0.62001	162.13	439820	3641800	0	-5.3024	1	6.262	26.91	26.91	43.59	40.85	1.26	0	1.26	0	0	0	0		NaN	NaN	NaN	NaN
20140904-PurClathDigest-1ug-01	126	125	1.3806	0.64	177.52	418610	3463700	0	-5.3024	1	6.262	26.91	26.91	43.59	40.84	1.264	0	1.264	0	0	0	0		NaN	NaN	NaN	NaN
20140904-PurClathDigest-1ug-01	127	126	1.3912	0.6899	229.51	306360	2827400	0	-5.3024	1	6.262	26.91	26.91	43.58	40.83	1.267	0	1.267	0	0	0	0		NaN	NaN	NaN	NaN
20140904-PurClathDigest-1ug-01	128	127	1.4027	0.66	199.81	362960	3182600	0	-5.3024	1	6.262	26.91	26.91	43.58	40.82	1.271	0	1.271	0	0	0	0		NaN	NaN	NaN	NaN
20140904-PurClathDigest-1ug-01	129	128	1.4137	0.6901	229.69	312010	2841700	0	-5.3024	1	6.262	26.91	26.91	43.57	40.81	1.274	0	1.274	0	0	0	0		NaN	NaN	NaN	NaN
20140904-PurClathDigest-1ug-01	130	129	1.4252	0.68	219.74	356620	3028500	0	-5.3024	1	6.261	26.91	26.91	43.56	40.8	1.278	0	1.278	0	0	0	0		NaN	NaN	NaN	NaN
20140904-PurClathDigest-1ug-01	131	130	1.4366	0.6301	175.68	354800	3275500	0	-5.3024	1	6.261	26.91	26.91	43.56	40.79	1.281	0	1.281	0	0	0	0		NaN	NaN	NaN	NaN
20140904-PurClathDigest-1ug-01	132	131	1.4471	0.6398	181.9	394650	3411600	0	-5.3024	1	6.261	26.92	26.92	43.55	40.78	1.285	0	1.285	0	0	0	0		NaN	NaN	NaN	NaN
20140904-PurClathDigest-1ug-01	133	132	1.4577	0.6501	191.73	369430	3248800	0	-5.3024	1	6.261	26.92	26.92	43.55	40.77	1.288	0	1.288	0	0	0	0		NaN	NaN	NaN	NaN
20140904-PurClathDigest-1ug-01	134	133	1.4686	0.6199	164.96	492370	3694100	0	-5.3024	1	6.261	26.92	26.92	43.54	40.76	1.292	0	1.292	0	0	0	0		NaN	NaN	NaN	NaN
20140904-PurClathDigest-1ug-01	135	134	1.4789	0.6501	187.68	374360	3358700	0	-5.3024	1	6.261	26.92	26.92	43.53	40.75	1.295	0	1.295	0	0	0	0		NaN	NaN	NaN	NaN
20140904-PurClathDigest-1ug-01	136	135	1.4897	0.6699	214.6	351610	3129100	0	-5.3024	1	6.26	26.92	26.92	43.53	40.74	1.298	0	1.298	0	0	0	0		NaN	NaN	NaN	NaN
20140904-PurClathDigest-1ug-01	137	136	1.5009	0.6603	201.55	337400	3036300	0	-5.3024	1	6.26	26.92	26.92	43.52	40.73	1.302	0	1.302	0	0	0	0		NaN	NaN	NaN	NaN
20140904-PurClathDigest-1ug-01	138	137	1.5119	0.6598	195	356220	3198400	0	-5.3024	1	6.26	26.92	26.92	43.52	40.72	1.305	0	1.305	0	0	0	0		NaN	NaN	NaN	NaN
20140904-PurClathDigest-1ug-01	139	138	1.5229	0.66	202.47	352110	3131900	0	-5.3024	1	6.26	26.92	26.92	43.51	40.71	1.309	0	1.309	0	0	0	0		NaN	NaN	NaN	NaN
20140904-PurClathDigest-1ug-01	140	139	1.5339	0.6699	209.82	345400	3073200	0	-5.3024	1	6.26	26.92	26.92	43.51	40.7	1.312	0	1.312	0	0	0	0		NaN	NaN	NaN	NaN
20140904-PurClathDigest-1ug-01	141	140	1.5451	0.7	225.81	304460	2823200	0	-5.3024	1	6.26	26.92	26.92	43.5	40.69	1.316	0	1.316	0	0	0	0		NaN	NaN	NaN	NaN
20140904-PurClathDigest-1ug-01	142	141	1.5567	0.67	207.8	334820	3015200	0	-5.3024	1	6.259	26.92	26.92	43.49	40.68	1.32	0	1.32	0	0	0	0		NaN	NaN	NaN	NaN
20140904-PurClathDigest-1ug-01	143	142	1.5679	0.66999	199.58	352420	3125700	0	-5.3024	1	6.259	26.93	26.93	43.49	40.67	1.323	0	1.323	0	0	0	0		NaN	NaN	NaN	NaN
20140904-PurClathDigest-1ug-01	144	143	1.5791	0.6401	183.02	378930	3300200	0	-5.3024	1	6.259	26.93	26.93	43.48	40.66	1.327	0	1.327	0	0	0	0		NaN	NaN	NaN	NaN
20140904-PurClathDigest-1ug-01	145	144	1.5897	0.63	174.91	410150	3595000	0	-5.3024	1	6.259	26.93	26.93	43.48	40.65	1.33	0	1.33	0	0	0	0		NaN	NaN	NaN	NaN
20140904-PurClathDigest-1ug-01	146	145	1.6002	0.66	203.23	332940	3030400	0	-5.3024	1	6.259	26.93	26.93	43.47	40.64	1.333	0	1.333	0	0	0	0		NaN	NaN	NaN	NaN
20140904-PurClathDigest-1ug-01	147	146	1.6112	0.6699	205.06	351710	3124600	0	-5.3024	1	6.259	26.93	26.93	43.46	40.63	1.337	0	1.337	0	0	0	0		NaN	NaN	NaN	NaN
20140904-PurClathDigest-1ug-01	148	147	1.6224	0.64	184.5	377920	3284000	0	-5.3024	1	6.259	26.93	26.93	43.46	40.62	1.34	0	1.34	0	0	0	0		NaN	NaN	NaN	NaN
20140904-PurClathDigest-1ug-01	149	148	1.6331	0.6701	209.56	335800	3004200	0	-5.3024	1	6.258	26.93	26.93	43.45	40.61	1.344	0	1.344	0	0	0	0		NaN	NaN	NaN	NaN
20140904-PurClathDigest-1ug-01	150	149	1.6442	0.69	209.6	325050	2929000	0	-5.3024	1	6.258	26.93	26.93	43.45	40.6	1.347	0	1.347	0	0	0	0		NaN	NaN	NaN	NaN
20140904-PurClathDigest-1ug-01	151	150	1.6557	0.6599	198.23	348990	3126200	0	-5.3024	1	6.26	26.92	26.92	43.44	40.59	1.348	0	1.348	0	0	0	0		NaN	NaN	NaN	NaN
20140904-PurClathDigest-1ug-01	152	151	1.6667	0.66999	207.8	385230	3122600	0	-5.3024	1	6.263	26.91	26.91	43.42	40.58	1.347	0	1.347	0	0	0	0		NaN	NaN	NaN	NaN
20140904-PurClathDigest-1ug-01	153	152	1.6779	0.6901	227.6	296930	2746300	0	-5.3024	1	6.266	26.89	26.89	43.4	40.56	1.345	0	1.345	0	0	0	0		NaN	NaN	NaN	NaN
20140904-PurClathDigest-1ug-01	154	153	1.6894	0.6699	207.17	336930	2997900	0	-5.3024	1	6.27	26.88	26.88	43.38	40.55	1.343	0	1.343	0	0	0	0		NaN	NaN	NaN	NaN
20140904-PurClathDigest-1ug-01	155	154	1.7006	0.69	226.53	302870	2801900	0	-5.3024	1	6.273	26.86	26.86	43.37	40.54	1.341	0	1.341	0	0	0	0		NaN	NaN	NaN	NaN
20140904-PurClathDigest-1ug-01	156	155	1.7121	0.6601	201.74	320420	2930700	0	-5.3024	1	6.277	26.84	26.84	43.35	40.52	1.339	0	1.339	0	0	0	0		NaN	NaN	NaN	NaN
20140904-PurClathDigest-1ug-01	157	156	1.7231	0.66	203.15	332000	2971900	0	-5.3024	1	6.28	26.83	26.83	43.33	40.51	1.338	0	1.338	0	0	0	0		NaN	NaN	NaN	NaN
20140904-PurClathDigest-1ug-01	158	157	1.7341	0.66	198.4	383370	3306200	0	-5.3024	1	6.283	26.81	26.81	43.32	40.5	1.336	0	1.336	0	0	0	0		NaN	NaN	NaN	NaN
20140904-PurClathDigest-1ug-01	159	158	1.7451	0.6999	207.99	329700	2990000	0	-5.3024	1	6.286	26.8	26.8	43.3	40.48	1.334	0	1.334	0	0	0	0		NaN	NaN	NaN	NaN
20140904-PurClathDigest-1ug-01	160	159	1.7567	0.6601	199.7	336890	3144100	0	-5.3024	1	6.29	26.78	26.78	43.28	40.47	1.332	0	1.332	0	0	0	0		NaN	NaN	NaN	NaN
20140904-PurClathDigest-1ug-01	161	160	1.7677	0.6599	197.41	454710	3364200	0	-5.3024	1	6.293	26.76	26.76	43.26	40.46	1.331	0	1.331	0	0	0	0		NaN	NaN	NaN	NaN
20140904-PurClathDigest-1ug-01	162	161	1.7787	0.6601	199.52	374040	3219900	0	-5.3024	1	6.296	26.75	26.75	43.25	40.45	1.329	0	1.329	0	0	0	0		NaN	NaN	NaN	NaN
20140904-PurClathDigest-1ug-01	163	162	1.7897	0.65	190.65	367780	3214800	0	-5.3024	1	6.3	26.73	26.73	43.23	40.43	1.327	0	1.327	0	0	0	0		NaN	NaN	NaN	NaN
20140904-PurClathDigest-1ug-01	164	163	1.8006	0.65	186.77	378800	3300400	0	-5.3024	1	6.303	26.72	26.72	43.21	40.42	1.325	0	1.325	0	0	0	0		NaN	NaN	NaN	NaN
20140904-PurClathDigest-1ug-01	165	164	1.8114	0.6899	214.91	348030	2949700	0	-5.3024	1	6.306	26.7	26.7	43.2	40.41	1.324	0	1.324	0	0	0	0		NaN	NaN	NaN	NaN
20140904-PurClathDigest-1ug-01	166	165	1.8229	0.66	202.79	348190	3056100	0	-5.3024	1	6.31	26.68	26.68	43.18	40.39	1.322	0	1.322	0	0	0	0		NaN	NaN	NaN	NaN
20140904-PurClathDigest-1ug-01	167	166	1.8339	0.68	218.3	309670	2904600	0	-5.3024	1	6.313	26.67	26.67	43.16	40.38	1.32	0	1.32	0	0	0	0		NaN	NaN	NaN	NaN
20140904-PurClathDigest-1ug-01	168	167	1.8452	0.67	202.16	344630	3225900	0	-5.3024	1	6.316	26.65	26.65	43.14	40.37	1.318	0	1.318	0	0	0	0		NaN	NaN	NaN	NaN
20140904-PurClathDigest-1ug-01	169	168	1.8564	0.6502	192.17	364350	3317200	0	-5.3024	1	6.32	26.63	26.63	43.13	40.35	1.316	0	1.316	0	0	0	0		NaN	NaN	NaN	NaN
20140904-PurClathDigest-1ug-01	170	169	1.8672	0.67979	221.06	389780	3134800	0	-5.3024	1	6.323	26.62	26.62	43.11	40.34	1.315	0	1.315	0	0	0	0		NaN	NaN	NaN	NaN
20140904-PurClathDigest-1ug-01	171	170	1.8786	0.6301	174.1	368450	3355600	0	-5.3024	1	6.326	26.6	26.6	43.09	40.33	1.313	0	1.313	0	0	0	0		NaN	NaN	NaN	NaN
20140904-PurClathDigest-1ug-01	172	171	1.8891	0.67	210.6	401250	3117500	0	-5.3024	1	6.329	26.59	26.59	43.08	40.32	1.311	0	1.311	0	0	0	0		NaN	NaN	NaN	NaN
20140904-PurClathDigest-1ug-01	173	172	1.9002	0.66989	215.57	311290	2857500	0	-5.3024	1	6.333	26.57	26.57	43.06	40.3	1.309	0	1.309	0	0	0	0		NaN	NaN	NaN	NaN
20140904-PurClathDigest-1ug-01	174	173	1.9114	0.66	200.38	316790	2916700	0	-5.3024	1	6.336	26.56	26.56	43.04	40.29	1.308	0	1.308	0	0	0	0		NaN	NaN	NaN	NaN
20140904-PurClathDigest-1ug-01	175	174	1.9224	0.6701	202.4	333220	3032100	0	-5.3024	1	6.339	26.54	26.54	43.03	40.28	1.306	0	1.306	0	0	0	0		NaN	NaN	NaN	NaN
20140904-PurClathDigest-1ug-01	176	175	1.9336	0.64	178.97	351580	3108900	0	-5.3024	1	6.343	26.52	26.52	43.01	40.27	1.304	0	1.304	0	0	0	0		NaN	NaN	NaN	NaN
20140904-PurClathDigest-1ug-01	177	176	1.9442	0.63	167.79	468810	3439700	0	-5.3024	1	6.346	26.51	26.51	42.99	40.25	1.303	0	1.303	0	0	0	0		NaN	NaN	NaN	NaN
20140904-PurClathDigest-1ug-01	178	177	1.9547	0.6399	181.33	393390	3245100	0	-5.3024	1	6.35	26.52	26.52	42.97	40.24	1.301	0	1.301	0	0	0	0		NaN	NaN	NaN	NaN
20140904-PurClathDigest-1ug-01	179	178	1.9654	0.67	210.99	338030	2889000	0	-5.3024	1	6.357	26.55	26.55	42.95	40.21	1.3	0	1.3	0	0	0	0		NaN	NaN	NaN	NaN
20140904-PurClathDigest-1ug-01	180	179	1.9766	0.6801	214.59	329090	2890300	0	-5.3024	1	6.363	26.59	26.59	42.92	40.19	1.298	0	1.298	0	0	0	0		NaN	NaN	NaN	NaN
20140904-PurClathDigest-1ug-01	181	180	1.9879	0.6599	201.57	325420	2952000	0	-5.3024	1	6.37	26.62	26.62	42.89	40.16	1.297	0	1.297	0	0	0	0		NaN	NaN	NaN	NaN
20140904-PurClathDigest-1ug-01	182	181	1.9989	0.63009	169.5	483670	3623500	0	-5.3024	1	6.376	26.66	26.66	42.87	40.14	1.295	0	1.295	0	0	0	0		NaN	NaN	NaN	NaN
20140904-PurClathDigest-1ug-01	183	182	2.0094	0.65001	194.95	327900	2995700	0	-5.3024	1	6.383	26.69	26.69	42.84	40.12	1.294	0	1.294	0	0	0	0		NaN	NaN	NaN	NaN
20140904-PurClathDigest-1ug-01	184	183	2.0202	0.62	163	466570	3562000	0	-5.3024	1	6.389	26.73	26.73	42.82	40.09	1.292	0	1.292	0	0	0	0		NaN	NaN	NaN	NaN
20140904-PurClathDigest-1ug-01	185	184	2.0306	0.6399	186.52	382610	3170600	0	-5.3024	1	6.395	26.76	26.76	42.79	40.07	1.291	0	1.291	0	0	0	0		NaN	NaN	NaN	NaN
20140904-PurClathDigest-1ug-01	186	185	2.0412	0.64	184.32	369020	3193300	0	-5.3024	1	6.402	26.8	26.8	42.76	40.05	1.29	0	1.29	0	0	0	0		NaN	NaN	NaN	NaN
20140904-PurClathDigest-1ug-01	187	186	2.0519	0.63001	170.49	347780	3182100	0	-5.3024	1	6.408	26.83	26.83	42.74	40.02	1.288	0	1.288	0	0	0	0		NaN	NaN	NaN	NaN
20140904-PurClathDigest-1ug-01	188	187	2.0624	0.6501	187.59	343250	3203400	0	-5.3024	1	6.414	26.86	26.86	42.71	40	1.287	0	1.287	0	0	0	0		NaN	NaN	NaN	NaN
20140904-PurClathDigest-1ug-01	189	188	2.0732	0.64	179.75	354650	3329800	0	-5.3024	1	6.421	26.9	26.9	42.69	39.98	1.285	0	1.285	0	0	0	0		NaN	NaN	NaN	NaN
20140904-PurClathDigest-1ug-01	190	189	2.0839	0.64	178.29	360660	3451600	0	-5.3024	1	6.427	26.93	26.93	42.66	39.95	1.284	0	1.284	0	0	0	0		NaN	NaN	NaN	NaN
20140904-PurClathDigest-1ug-01	191	190	2.0946	0.64991	180.24	357520	3621200	0	-5.3024	1	6.433	26.97	26.97	42.64	39.93	1.282	0	1.282	0	0	0	0		NaN	NaN	NaN	NaN
20140904-PurClathDigest-1ug-01	192	191	2.1054	0.61	148.91	473360	4081900	0	-5.3024	1	6.44	27	27	42.61	39.9	1.281	0	1.281	0	0	0	0		NaN	NaN	NaN	NaN
20140904-PurClathDigest-1ug-01	193	192	2.1156	0.6001	144.5	419470	3946100	0	-5.3024	1	6.446	27.04	27.04	42.59	39.88	1.28	0	1.28	0	0	0	0		NaN	NaN	NaN	NaN
20140904-PurClathDigest-1ug-01	194	193	2.1256	0.64	183.63	382740	3342500	0	-5.3024	1	6.452	27.07	27.07	42.56	39.86	1.278	0	1.278	0	0	0	0		NaN	NaN	NaN	NaN
20140904-PurClathDigest-1ug-01	195	194	2.1362	0.66	197.33	332830	3029500	0	-5.3024	1	6.458	27.1	27.1	42.54	39.84	1.277	0	1.277	0	0	0	0		NaN	NaN	NaN	NaN
20140904-PurClathDigest-1ug-01	196	195	2.1472	0.66001	198.29	336440	3020300	0	-5.3024	1	6.465	27.14	27.14	42.51	39.81	1.275	0	1.275	0	0	0	0		NaN	NaN	NaN	NaN
20140904-PurClathDigest-1ug-01	197	196	2.1582	0.65	194.25	343500	3152400	0	-5.3024	1	6.471	27.18	27.18	42.48	39.79	1.274	0	1.274	0	0	0	0		NaN	NaN	NaN	NaN
20140904-PurClathDigest-1ug-01	198	197	2.1691	0.65989	199.63	314040	2903300	0	-5.3024	1	6.478	27.21	27.21	42.46	39.77	1.273	0	1.273	0	0	0	0		NaN	NaN	NaN	NaN
20140904-PurClathDigest-1ug-01	199	198	2.1801	0.66001	201.52	316530	2963500	0	-5.3024	1	6.484	27.25	27.25	42.43	39.74	1.271	0	1.271	0	0	0	0		NaN	NaN	NaN	NaN
20140904-PurClathDigest-1ug-01	200	199	2.1911	0.66999	211.04	328250	2869300	0	-5.3024	1	6.491	27.28	27.28	42.4	39.72	1.27	0	1.27	0	0	0	0		NaN	NaN	NaN	NaN
20140904-PurClathDigest-1ug-01	201	200	2.2022	0.67011	207.31	311080	2829400	0	-5.3024	1	6.497	27.32	27.32	42.38	39.69	1.268	0	1.268	0	0	0	0		NaN	NaN	NaN	NaN
20140904-PurClathDigest-1ug-01	202	201	2.2134	0.66999	204.97	323640	2838400	0	-5.3024	1	6.504	27.35	27.35	42.35	39.67	1.267	0	1.267	0	0	0	0		NaN	NaN	NaN	NaN
20140904-PurClathDigest-1ug-01	203	202	2.2246	0.64	185.79	356370	3043000	0	-5.3024	1	6.511	27.39	27.39	42.32	39.64	1.265	0	1.265	0	0	0	0		NaN	NaN	NaN	NaN
20140904-PurClathDigest-1ug-01	204	203	2.2352	0.6299	175.63	363680	3198000	0	-5.3024	1	6.517	27.43	27.43	42.3	39.62	1.264	0	1.264	0	0	0	0		NaN	NaN	NaN	NaN
20140904-PurClathDigest-1ug-01	205	204	2.2457	0.67001	205.67	328960	2874200	0	-5.3024	1	6.523	27.46	27.46	42.27	39.6	1.262	0	1.262	0	0	0	0		NaN	NaN	NaN	NaN
20140904-PurClathDigest-1ug-01	206	205	2.2569	0.68999	224.37	296460	2677400	0	-5.3024	1	6.535	27.47	27.47	42.22	39.55	1.263	0	1.263	0	0	0	0		NaN	NaN	NaN	NaN
20140904-PurClathDigest-1ug-01	207	206	2.2684	0.69011	221.8	285940	2634800	0	-5.3024	1	6.55	27.47	27.47	42.16	39.48	1.264	0	1.264	0	0	0	0		NaN	NaN	NaN	NaN
20140904-PurClathDigest-1ug-01	208	207	2.2799	0.68999	235.54	281770	2526300	0	-5.3024	1	6.565	27.47	27.47	42.1	39.41	1.265	0	1.265	0	0	0	0		NaN	NaN	NaN	NaN
20140904-PurClathDigest-1ug-01	209	208	2.2914	0.67991	219.1	315180	2713500	0	-5.3024	1	6.58	27.46	27.46	42.03	39.35	1.266	0	1.266	0	0	0	0		NaN	NaN	NaN	NaN
20140904-PurClathDigest-1ug-01	210	209	2.3027	0.67009	214.83	316410	2798500	0	-5.3024	1	6.595	27.46	27.46	41.97	39.28	1.267	0	1.267	0	0	0	0		NaN	NaN	NaN	NaN
20140904-PurClathDigest-1ug-01	211	210	2.3139	0.67991	221.56	326200	2696400	0	-5.3024	1	6.609	27.46	27.46	41.91	39.22	1.269	0	1.269	0	0	0	0		NaN	NaN	NaN	NaN
20140904-PurClathDigest-1ug-01	212	211	2.3252	0.66	196.67	427490	3085100	0	-5.3024	1	6.624	27.45	27.45	41.84	39.15	1.27	0	1.27	0	0	0	0		NaN	NaN	NaN	NaN
20140904-PurClathDigest-1ug-01	213	212	2.3362	0.67009	213.59	316730	2777600	0	-5.3024	1	6.639	27.45	27.45	41.78	39.09	1.271	0	1.271	0	0	0	0		NaN	NaN	NaN	NaN
20140904-PurClathDigest-1ug-01	214	213	2.3474	0.66001	196.53	326470	2884000	0	-5.3024	1	6.653	27.45	27.45	41.72	39.02	1.272	0	1.272	0	0	0	0		NaN	NaN	NaN	NaN
20140904-PurClathDigest-1ug-01	215	214	2.3584	0.64	181.46	384500	3118200	0	-5.3024	1	6.668	27.45	27.45	41.66	38.96	1.273	0	1.273	0	0	0	0		NaN	NaN	NaN	NaN
20140904-PurClathDigest-1ug-01	216	215	2.3691	0.70989	244.25	284440	2490700	0	-5.3024	1	6.682	27.44	27.44	41.6	38.9	1.275	0	1.275	0	0	0	0		NaN	NaN	NaN	NaN
20140904-PurClathDigest-1ug-01	217	216	2.3809	0.72001	257.01	261360	2319000	0	-5.3024	1	6.697	27.44	27.44	41.53	38.83	1.276	0	1.276	0	0	0	0		NaN	NaN	NaN	NaN
20140904-PurClathDigest-1ug-01	218	217	2.3929	0.70011	240.01	284780	2499500	0	-5.3024	1	6.713	27.44	27.44	41.46	38.76	1.277	0	1.277	0	0	0	0		NaN	NaN	NaN	NaN
20140904-PurClathDigest-1ug-01	219	218	2.4046	0.67989	216.77	313480	2636800	0	-5.3024	1	6.728	27.43	27.43	41.4	38.69	1.278	0	1.278	0	0	0	0		NaN	NaN	NaN	NaN
20140904-PurClathDigest-1ug-01	220	219	2.4159	0.72001	264.05	269800	2403300	0	-5.3024	1	6.743	27.43	27.43	41.34	38.63	1.279	0	1.279	0	0	0	0		NaN	NaN	NaN	NaN
20140904-PurClathDigest-1ug-01	221	220	2.4279	0.71009	248.45	276610	2404000	0	-5.3024	1	6.759	27.43	27.43	41.27	38.56	1.281	0	1.281	0	0	0	0		NaN	NaN	NaN	NaN
20140904-PurClathDigest-1ug-01	222	221	2.4397	0.65001	182.57	331740	2837900	0	-5.3024	1	6.774	27.43	27.43	41.2	38.49	1.282	0	1.282	0	0	0	0		NaN	NaN	NaN	NaN
20140904-PurClathDigest-1ug-01	223	222	2.4506	0.67989	217.29	316780	2665400	0	-5.3024	1	6.789	27.42	27.42	41.14	38.43	1.283	0	1.283	0	0	0	0		NaN	NaN	NaN	NaN
20140904-PurClathDigest-1ug-01	224	223	2.4619	0.72011	265.4	291490	2355800	0	-5.3024	1	6.803	27.42	27.42	41.08	38.36	1.284	0	1.284	0	0	0	0		NaN	NaN	NaN	NaN
20140904-PurClathDigest-1ug-01	225	224	2.4739	0.72989	271.48	258790	2281300	0	-5.3024	1	6.819	27.42	27.42	41.01	38.29	1.286	0	1.286	0	0	0	0		NaN	NaN	NaN	NaN
20140904-PurClathDigest-1ug-01	226	225	2.4861	0.64021	184.95	448650	3230400	0	-5.3024	1	6.835	27.41	27.41	40.94	38.22	1.287	0	1.287	0	0	0	0		NaN	NaN	NaN	NaN
20140904-PurClathDigest-1ug-01	227	226	2.4967	0.65	195.68	357860	2996300	0	-5.3024	1	6.849	27.41	27.41	40.88	38.16	1.288	0	1.288	0	0	0	0		NaN	NaN	NaN	NaN
20140904-PurClathDigest-1ug-01	228	227	2.5076	0.70991	251.83	294160	2459800	0	-5.3024	1	6.863	27.41	27.41	40.82	38.1	1.289	0	1.289	0	0	0	0		NaN	NaN	NaN	NaN
20140904-PurClathDigest-1ug-01	229	228	2.5194	0.69989	240.9	291570	2557700	0	-5.3024	1	6.879	27.41	27.41	40.76	38.03	1.29	0	1.29	0	0	0	0		NaN	NaN	NaN	NaN
20140904-PurClathDigest-1ug-01	230	229	2.5311	0.70001	240.71	311100	2502400	0	-5.3024	1	6.894	27.4	27.4	40.69	37.96	1.292	0	1.292	0	0	0	0		NaN	NaN	NaN	NaN
20140904-PurClathDigest-1ug-01	231	230	2.5427	0.70999	250.2	283540	2453600	0	-5.3024	1	6.909	27.4	27.4	40.63	37.89	1.293	0	1.293	0	0	0	0		NaN	NaN	NaN	NaN
20140904-PurClathDigest-1ug-01	232	231	2.5546	0.68011	218.94	338070	2803900	0	-5.3024	1	6.918	27.34	27.34	40.56	37.82	1.294	0	1.294	0	0	0	0		NaN	NaN	NaN	NaN
20140904-PurClathDigest-1ug-01	233	232	2.5659	0.69989	239.87	302490	2544500	0	-5.3024	1	6.916	27.18	27.18	40.51	37.76	1.294	0	1.294	0	0	0	0		NaN	NaN	NaN	NaN
20140904-PurClathDigest-1ug-01	234	233	2.5776	0.72011	239.06	289250	2462500	0	-5.3024	1	6.914	27.02	27.02	40.45	37.7	1.295	0	1.295	0	0	0	0		NaN	NaN	NaN	NaN
20140904-PurClathDigest-1ug-01	235	234	2.5896	0.67999	225.78	326580	2579900	0	-5.3024	1	6.912	26.86	26.86	40.38	37.64	1.296	0	1.296	0	0	0	0		NaN	NaN	NaN	NaN
20140904-PurClathDigest-1ug-01	236	235	2.6009	0.7299	271.36	292190	2492600	0	-5.3024	1	6.911	26.7	26.7	40.32	37.58	1.296	0	1.296	0	0	0	0		NaN	NaN	NaN	NaN
20140904-PurClathDigest-1ug-01	237	236	2.6131	0.66999	201.48	531420	3311400	0	-5.3024	1	6.909	26.54	26.54	40.26	37.51	1.297	0	1.297	0	0	0	0		NaN	NaN	NaN	NaN
20140904-PurClathDigest-1ug-01	238	237	2.6242	0.66011	206.19	360860	2948900	0	-5.3024	1	6.907	26.38	26.38	40.2	37.45	1.298	0	1.298	0	0	0	0		NaN	NaN	NaN	NaN
20140904-PurClathDigest-1ug-01	239	238	2.6352	0.67999	221.14	348310	2815500	0	-5.3024	1	6.905	26.23	26.23	40.15	37.39	1.298	0	1.298	0	0	0	0		NaN	NaN	NaN	NaN
20140904-PurClathDigest-1ug-01	240	239	2.6466	0.71001	244.91	299680	2585200	0	-5.3024	1	6.903	26.08	26.08	40.09	37.33	1.299	0	1.299	0	0	0	0		NaN	NaN	NaN	NaN
20140904-PurClathDigest-1ug-01	241	240	2.6584	0.70009	239.43	289110	2553600	0	-5.3024	1	6.901	25.92	25.92	40.03	37.27	1.299	0	1.299	0	0	0	0		NaN	NaN	NaN	NaN
20140904-PurClathDigest-1ug-01	242	241	2.6701	0.69981	245.7	277500	2402200	0	-5.3024	1	6.899	25.76	25.76	39.97	37.2	1.3	0	1.3	0	0	0	0		NaN	NaN	NaN	NaN
20140904-PurClathDigest-1ug-01	243	242	2.6817	0.7408	275.09	280210	2341900	0	-5.3024	1	6.897	25.6	25.6	39.91	37.14	1.301	0	1.301	0	0	0	0		NaN	NaN	NaN	NaN
20140904-PurClathDigest-1ug-01	244	243	2.6941	0.72929	269.42	266300	2307200	0	-5.3024	1	6.895	25.43	25.43	39.84	37.08	1.301	0	1.301	0	0	0	0		NaN	NaN	NaN	NaN
20140904-PurClathDigest-1ug-01	245	244	2.7062	0.72001	257.35	280470	2424100	0	-5.3024	1	6.893	25.26	25.26	39.78	37.01	1.302	0	1.302	0	0	0	0		NaN	NaN	NaN	NaN
20140904-PurClathDigest-1ug-01	246	245	2.7182	0.6602	193.86	399050	3036100	0	-5.3024	1	6.891	25.1	25.1	39.72	36.95	1.303	0	1.303	0	0	0	0		NaN	NaN	NaN	NaN
20140904-PurClathDigest-1ug-01	247	246	2.7292	0.64971	191.07	374290	3023900	0	-5.3024	1	6.889	24.95	24.95	39.66	36.89	1.303	0	1.303	0	0	0	0		NaN	NaN	NaN	NaN
20140904-PurClathDigest-1ug-01	248	247	2.7401	0.6501	194.5	375220	3050600	0	-5.3024	1	6.888	24.8	24.8	39.61	36.83	1.304	0	1.304	0	0	0	0		NaN	NaN	NaN	NaN
20140904-PurClathDigest-1ug-01	249	248	2.7509	0.6499	188.27	372020	3050800	0	-5.3024	1	6.886	24.65	24.65	39.55	36.77	1.304	0	1.304	0	0	0	0		NaN	NaN	NaN	NaN
20140904-PurClathDigest-1ug-01	250	249	2.7617	0.7301	266.05	276440	2344700	0	-5.3024	1	6.884	24.5	24.5	39.5	36.71	1.305	0	1.305	0	0	0	0		NaN	NaN	NaN	NaN
20140904-PurClathDigest-1ug-01	251	250	2.7739	0.64	183.36	444490	3090800	0	-5.3024	1	6.882	24.34	24.34	39.43	36.65	1.305	0	1.305	0	0	0	0		NaN	NaN	NaN	NaN
20140904-PurClathDigest-1ug-01	252	251	2.7846	0.68001	218.59	351180	2818900	0	-5.3024	1	6.88	24.19	24.19	39.38	36.59	1.306	0	1.306	0	0	0	0		NaN	NaN	NaN	NaN
20140904-PurClathDigest-1ug-01	253	252	2.7959	0.68989	230.21	311890	2689400	0	-5.3024	1	6.879	24.04	24.04	39.32	36.53	1.307	0	1.307	0	0	0	0		NaN	NaN	NaN	NaN
20140904-PurClathDigest-1ug-01	254	253	2.8074	0.70001	237.52	341240	2581000	0	-5.3024	1	6.877	23.88	23.88	39.26	36.47	1.307	0	1.307	0	0	0	0		NaN	NaN	NaN	NaN
20140904-PurClathDigest-1ug-01	255	254	2.8191	0.67009	214.57	333890	2775300	0	-5.3024	1	6.875	23.72	23.72	39.2	36.4	1.308	0	1.308	0	0	0	0		NaN	NaN	NaN	NaN
20140904-PurClathDigest-1ug-01	256	255	2.8302	0.71001	249.53	279050	2378100	0	-5.3024	1	6.873	23.57	23.57	39.14	36.34	1.308	0	1.308	0	0	0	0		NaN	NaN	NaN	NaN
20140904-PurClathDigest-1ug-01	257	256	2.8421	0.70009	239.33	279760	2448600	0	-5.3024	1	6.871	23.41	23.41	39.08	36.28	1.309	0	1.309	0	0	0	0		NaN	NaN	NaN	NaN
20140904-PurClathDigest-1ug-01	258	257	2.8537	0.71011	248.35	270880	2377800	0	-5.3024	1	6.869	23.26	23.26	39.03	36.23	1.308	0	1.308	0	0	0	0		NaN	NaN	NaN	NaN
20140904-PurClathDigest-1ug-01	259	258	2.8656	0.66979	207.15	326570	2596100	0	-5.3024	1	6.866	23.14	23.14	38.98	36.19	1.305	0	1.305	0	0	0	0		NaN	NaN	NaN	NaN
20140904-PurClathDigest-1ug-01	260	259	2.8767	0.70991	246.24	276910	2361000	0	-5.3024	1	6.863	23.03	23.03	38.94	36.15	1.301	0	1.301	0	0	0	0		NaN	NaN	NaN	NaN
20140904-PurClathDigest-1ug-01	261	260	2.8886	0.69999	241.39	299380	2485200	0	-5.3024	1	6.86	22.91	22.91	38.89	36.11	1.297	0	1.297	0	0	0	0		NaN	NaN	NaN	NaN
20140904-PurClathDigest-1ug-01	262	261	2.9002	0.7401	279.44	270000	2231100	0	-5.3024	1	6.858	22.8	22.8	38.85	36.08	1.294	0	1.294	0	0	0	0		NaN	NaN	NaN	NaN
20140904-PurClathDigest-1ug-01	263	262	2.9126	0.7299	268.54	256240	2247100	0	-5.3024	1	6.855	22.67	22.67	38.8	36.04	1.29	0	1.29	0	0	0	0		NaN	NaN	NaN	NaN
20140904-PurClathDigest-1ug-01	264	263	2.9247	0.6601	201.5	340780	2773900	0	-5.3024	1	6.852	22.55	22.55	38.75	36	1.286	0	1.286	0	0	0	0		NaN	NaN	NaN	NaN
20140904-PurClathDigest-1ug-01	265	264	2.9357	0.66999	211.3	302150	2622300	0	-5.3024	1	6.849	22.44	22.44	38.71	35.96	1.282	0	1.282	0	0	0	0		NaN	NaN	NaN	NaN
20140904-PurClathDigest-1ug-01	266	265	2.9469	0.72001	259.04	280080	2416100	0	-5.3024	1	6.846	22.33	22.33	38.67	35.93	1.279	0	1.279	0	0	0	0		NaN	NaN	NaN	NaN
20140904-PurClathDigest-1ug-01	267	266	2.9589	0.71001	246.53	266900	2359700	0	-5.3024	1	6.843	22.21	22.21	38.62	35.89	1.275	0	1.275	0	0	0	0		NaN	NaN	NaN	NaN
20140904-PurClathDigest-1ug-01	268	267	2.9707	0.70999	250.57	260370	2313500	0	-5.3024	1	6.841	22.1	22.1	38.58	35.85	1.271	0	1.271	0	0	0	0		NaN	NaN	NaN	NaN
20140904-PurClathDigest-1ug-01	269	268	2.9826	0.68001	222.53	316160	2608700	0	-5.3024	1	6.838	21.98	21.98	38.53	35.81	1.267	0	1.267	0	0	0	0		NaN	NaN	NaN	NaN
20140904-PurClathDigest-1ug-01	270	269	2.9939	0.68999	229.48	302300	2551700	0	-5.3024	1	6.835	21.87	21.87	38.49	35.78	1.264	0	1.264	0	0	0	0		NaN	NaN	NaN	NaN
20140904-PurClathDigest-1ug-01	271	270	3.0054	0.73	270.2	248740	2180300	0	-5.3024	1	6.832	21.75	21.75	38.44	35.74	1.26	0	1.26	0	0	0	0		NaN	NaN	NaN	NaN
20140904-PurClathDigest-1ug-01	272	271	3.0176	0.66989	213.53	334390	2724800	0	-5.3024	1	6.829	21.63	21.63	38.4	35.7	1.256	0	1.256	0	0	0	0		NaN	NaN	NaN	NaN
20140904-PurClathDigest-1ug-01	273	272	3.0287	0.72011	260.63	267610	2291000	0	-5.3024	1	6.827	21.52	21.52	38.35	35.67	1.253	0	1.253	0	0	0	0		NaN	NaN	NaN	NaN
20140904-PurClathDigest-1ug-01	274	273	3.0407	0.75	284.2	260270	2208200	0	-5.3024	1	6.824	21.4	21.4	38.31	35.63	1.249	0	1.249	0	0	0	0		NaN	NaN	NaN	NaN
20140904-PurClathDigest-1ug-01	275	274	3.0532	0.71009	256.16	273470	2351300	0	-5.3024	1	6.821	21.27	21.27	38.26	35.59	1.245	0	1.245	0	0	0	0		NaN	NaN	NaN	NaN
20140904-PurClathDigest-1ug-01	276	275	3.0651	0.7299	273.45	263090	2277000	0	-5.3024	1	6.818	21.16	21.16	38.21	35.55	1.241	0	1.241	0	0	0	0		NaN	NaN	NaN	NaN
20140904-PurClathDigest-1ug-01	277	276	3.0772	0.71001	252.38	308260	2436200	0	-5.3024	1	6.815	21.04	21.04	38.17	35.51	1.237	0	1.237	0	0	0	0		NaN	NaN	NaN	NaN
20140904-PurClathDigest-1ug-01	278	277	3.0891	0.71999	260.38	265310	2324800	0	-5.3024	1	6.812	20.92	20.92	38.12	35.47	1.234	0	1.234	0	0	0	0		NaN	NaN	NaN	NaN
20140904-PurClathDigest-1ug-01	279	278	3.1011	0.67991	216.79	334810	2725500	0	-5.3024	1	6.809	20.8	20.8	38.08	35.43	1.23	0	1.23	0	0	0	0		NaN	NaN	NaN	NaN
20140904-PurClathDigest-1ug-01	280	279	3.1124	0.70009	239.29	308850	2535200	0	-5.3024	1	6.806	20.69	20.69	38.03	35.4	1.226	0	1.226	0	0	0	0		NaN	NaN	NaN	NaN
20140904-PurClathDigest-1ug-01	281	280	3.1241	0.67001	210.92	411310	2870400	0	-5.3024	1	6.804	20.57	20.57	37.99	35.36	1.223	0	1.223	0	0	0	0		NaN	NaN	NaN	NaN
20140904-PurClathDigest-1ug-01	282	281	3.1352	0.68989	222.04	310970	2643400	0	-5.3024	1	6.801	20.46	20.46	37.95	35.33	1.219	0	1.219	0	0	0	0		NaN	NaN	NaN	NaN
20140904-PurClathDigest-1ug-01	283	282	3.1467	0.71001	244.65	304020	2485100	0	-5.3024	1	6.798	20.34	20.34	37.9	35.29	1.215	0	1.215	0	0	0	0		NaN	NaN	NaN	NaN
20140904-PurClathDigest-1ug-01	284	283	3.1586	0.68999	228.92	342200	2632400	0	-5.3024	1	6.795	20.3	20.3	37.87	35.26	1.215	0	1.215	0	0	0	0		NaN	NaN	NaN	NaN
20140904-PurClathDigest-1ug-01	285	284	3.1701	0.69001	235.07	353050	2624400	0	-5.3024	1	6.793	20.28	20.28	37.85	35.24	1.217	0	1.217	0	0	0	0		NaN	NaN	NaN	NaN
20140904-PurClathDigest-1ug-01	286	285	3.1816	0.7401	274.83	271150	2323200	0	-5.3024	1	6.79	20.26	20.26	37.83	35.22	1.218	0	1.218	0	0	0	0		NaN	NaN	NaN	NaN
20140904-PurClathDigest-1ug-01	287	286	3.1939	0.72999	267.52	285450	2425100	0	-5.3024	1	6.788	20.23	20.23	37.81	35.2	1.22	0	1.22	0	0	0	0		NaN	NaN	NaN	NaN
20140904-PurClathDigest-1ug-01	288	287	3.2061	0.75	288.99	253380	2171400	0	-5.3024	1	6.785	20.21	20.21	37.79	35.18	1.222	0	1.222	0	0	0	0		NaN	NaN	NaN	NaN
20140904-PurClathDigest-1ug-01	289	288	3.2186	0.7199	257.01	290830	2400100	0	-5.3024	1	6.782	20.19	20.19	37.77	35.16	1.223	0	1.223	0	0	0	0		NaN	NaN	NaN	NaN
20140904-PurClathDigest-1ug-01	290	289	3.2306	0.7503	288.79	258380	2200600	0	-5.3024	1	6.779	20.17	20.17	37.75	35.14	1.225	0	1.225	0	0	0	0		NaN	NaN	NaN	NaN
20140904-PurClathDigest-1ug-01	291	290	3.2431	0.74979	290.71	275550	2242900	0	-5.3024	1	6.776	20.15	20.15	37.73	35.12	1.227	0	1.227	0	0	0	0		NaN	NaN	NaN	NaN
20140904-PurClathDigest-1ug-01	292	291	3.2556	0.74	276.66	257460	2190600	0	-5.3024	1	6.774	20.12	20.12	37.71	35.09	1.228	0	1.228	0	0	0	0		NaN	NaN	NaN	NaN
20140904-PurClathDigest-1ug-01	293	292	3.2679	0.69001	226.73	314970	2620500	0	-5.3024	1	6.771	20.1	20.1	37.69	35.07	1.23	0	1.23	0	0	0	0		NaN	NaN	NaN	NaN
20140904-PurClathDigest-1ug-01	294	293	3.2794	0.70989	247.85	282260	2385300	0	-5.3024	1	6.768	20.08	20.08	37.67	35.05	1.231	0	1.231	0	0	0	0		NaN	NaN	NaN	NaN
20140904-PurClathDigest-1ug-01	295	294	3.2912	0.7401	276.3	260740	2244700	0	-5.3024	1	6.766	20.06	20.06	37.65	35.03	1.233	0	1.233	0	0	0	0		NaN	NaN	NaN	NaN
20140904-PurClathDigest-1ug-01	296	295	3.3036	0.72001	257.61	289920	2422600	0	-5.3024	1	6.763	20.04	20.04	37.62	35.01	1.235	0	1.235	0	0	0	0		NaN	NaN	NaN	NaN
20140904-PurClathDigest-1ug-01	297	296	3.3156	0.68999	229.02	385780	2771500	0	-5.3024	1	6.76	20.02	20.02	37.6	34.99	1.236	0	1.236	0	0	0	0		NaN	NaN	NaN	NaN
20140904-PurClathDigest-1ug-01	298	297	3.3271	0.73	266.58	276850	2335300	0	-5.3024	1	6.758	20	20	37.58	34.97	1.238	0	1.238	0	0	0	0		NaN	NaN	NaN	NaN
20140904-PurClathDigest-1ug-01	299	298	3.3392	0.71999	259.87	274490	2363700	0	-5.3024	1	6.755	19.98	19.98	37.56	34.95	1.239	0	1.239	0	0	0	0		NaN	NaN	NaN	NaN
20140904-PurClathDigest-1ug-01	300	299	3.3512	0.71001	250	321000	2504900	0	-5.3024	1	6.752	19.96	19.96	37.54	34.93	1.241	0	1.241	0	0	0	0		NaN	NaN	NaN	NaN
20140904-PurClathDigest-1ug-01	301	300	3.3631	0.68991	226.18	370330	2763300	0	-5.3024	1	6.749	19.93	19.93	37.52	34.91	1.242	0	1.242	0	0	0	0		NaN	NaN	NaN	NaN
20140904-PurClathDigest-1ug-01	302	301	3.3746	0.69969	233.8	301400	2582800	0	-5.3024	1	6.747	19.91	19.91	37.5	34.89	1.244	0	1.244	0	0	0	0		NaN	NaN	NaN	NaN
20140904-PurClathDigest-1ug-01	303	302	3.3862	0.72031	258.61	288720	2439100	0	-5.3024	1	6.744	19.89	19.89	37.48	34.87	1.246	0	1.246	0	0	0	0		NaN	NaN	NaN	NaN
20140904-PurClathDigest-1ug-01	304	303	3.3982	0.72009	256.11	289820	2437600	0	-5.3024	1	6.742	19.87	19.87	37.46	34.84	1.247	0	1.247	0	0	0	0		NaN	NaN	NaN	NaN
20140904-PurClathDigest-1ug-01	305	304	3.4102	0.72001	263.43	298260	2430900	0	-5.3024	1	6.739	19.85	19.85	37.44	34.82	1.249	0	1.249	0	0	0	0		NaN	NaN	NaN	NaN
20140904-PurClathDigest-1ug-01	306	305	3.4222	0.7299	271.04	272900	2295300	0	-5.3024	1	6.736	19.83	19.83	37.42	34.8	1.25	0	1.25	0	0	0	0		NaN	NaN	NaN	NaN
20140904-PurClathDigest-1ug-01	307	306	3.4344	0.72999	268.14	286010	2332100	0	-5.3024	1	6.733	19.81	19.81	37.4	34.78	1.252	0	1.252	0	0	0	0		NaN	NaN	NaN	NaN
20140904-PurClathDigest-1ug-01	308	307	3.4466	0.70001	246.14	335050	2643500	0	-5.3024	1	6.731	19.79	19.79	37.38	34.76	1.254	0	1.254	0	0	0	0		NaN	NaN	NaN	NaN
20140904-PurClathDigest-1ug-01	309	308	3.4582	0.7409	280.98	272690	2303500	0	-5.3024	1	6.738	19.87	19.87	37.4	34.78	1.252	0	1.252	0	0	0	0		NaN	NaN	NaN	NaN
20140904-PurClathDigest-1ug-01	310	309	3.4706	0.70989	238.31	283870	2419600	0	-5.3024	1	6.749	20.02	20.02	37.44	34.83	1.248	0	1.248	0	0	0	0		NaN	NaN	NaN	NaN
20140904-PurClathDigest-1ug-01	311	310	3.4824	0.7293	269.38	267540	2272800	0	-5.3024	1	6.76	20.15	20.15	37.47	34.87	1.245	0	1.245	0	0	0	0		NaN	NaN	NaN	NaN
20140904-PurClathDigest-1ug-01	312	311	3.4946	0.72001	263.6	292500	2423800	0	-5.3024	1	6.772	20.29	20.29	37.51	34.91	1.241	0	1.241	0	0	0	0		NaN	NaN	NaN	NaN
20140904-PurClathDigest-1ug-01	313	312	3.5066	0.73999	278.39	284870	2329700	0	-5.3024	1	6.783	20.43	20.43	37.55	34.95	1.238	0	1.238	0	0	0	0		NaN	NaN	NaN	NaN
20140904-PurClathDigest-1ug-01	314	313	3.5189	0.66991	216.65	347930	2732600	0	-5.3024	1	6.795	20.57	20.57	37.59	34.99	1.234	0	1.234	0	0	0	0		NaN	NaN	NaN	NaN
20140904-PurClathDigest-1ug-01	315	314	3.5301	0.69999	236.01	346650	2592100	0	-5.3024	1	6.805	20.69	20.69	37.62	35.03	1.231	0	1.231	0	0	0	0		NaN	NaN	NaN	NaN
20140904-PurClathDigest-1ug-01	316	315	3.5417	0.67001	210.77	429260	3011400	0	-5.3024	1	6.816	20.83	20.83	37.66	35.07	1.227	0	1.227	0	0	0	0		NaN	NaN	NaN	NaN
20140904-PurClathDigest-1ug-01	317	316	3.5529	0.67999	224.21	331180	2717000	0	-5.3024	1	6.827	20.96	20.96	37.69	35.11	1.224	0	1.224	0	0	0	0		NaN	NaN	NaN	NaN
20140904-PurClathDigest-1ug-01	318	317	3.5642	0.71011	247.87	297830	2468900	0	-5.3024	1	6.838	21.08	21.08	37.73	35.15	1.221	0	1.221	0	0	0	0		NaN	NaN	NaN	NaN
20140904-PurClathDigest-1ug-01	319	318	3.5761	0.69999	241.05	313890	2441200	0	-5.3024	1	6.849	21.22	21.22	37.76	35.19	1.217	0	1.217	0	0	0	0		NaN	NaN	NaN	NaN
20140904-PurClathDigest-1ug-01	320	319	3.5877	0.72001	260.31	289860	2369300	0	-5.3024	1	6.86	21.35	21.35	37.8	35.23	1.214	0	1.214	0	0	0	0		NaN	NaN	NaN	NaN
20140904-PurClathDigest-1ug-01	321	320	3.5997	0.7199	263.42	286740	2355900	0	-5.3024	1	6.871	21.49	21.49	37.84	35.28	1.21	0	1.21	0	0	0	0		NaN	NaN	NaN	NaN
20140904-PurClathDigest-1ug-01	322	321	3.6117	0.72009	254	280520	2368700	0	-5.3024	1	6.883	21.63	21.63	37.87	35.32	1.207	0	1.207	0	0	0	0		NaN	NaN	NaN	NaN
20140904-PurClathDigest-1ug-01	323	322	3.6237	0.75	287.11	264990	2219300	0	-5.3024	1	6.894	21.76	21.76	37.91	35.36	1.203	0	1.203	0	0	0	0		NaN	NaN	NaN	NaN
20140904-PurClathDigest-1ug-01	324	323	3.6362	0.73	267.1	258670	2238100	0	-5.3024	1	6.906	21.91	21.91	37.95	35.4	1.2	0	1.2	0	0	0	0		NaN	NaN	NaN	NaN
20140904-PurClathDigest-1ug-01	325	324	3.6484	0.7599	287.91	263070	2182600	0	-5.3024	1	6.917	22.05	22.05	37.99	35.45	1.196	0	1.196	0	0	0	0		NaN	NaN	NaN	NaN
20140904-PurClathDigest-1ug-01	326	325	3.6611	0.70999	250.6	314910	2446100	0	-5.3024	1	6.929	22.19	22.19	38.03	35.49	1.193	0	1.193	0	0	0	0		NaN	NaN	NaN	NaN
20140904-PurClathDigest-1ug-01	327	326	3.6729	0.70011	243.06	303140	2503100	0	-5.3024	1	6.94	22.33	22.33	38.06	35.53	1.189	0	1.189	0	0	0	0		NaN	NaN	NaN	NaN
20140904-PurClathDigest-1ug-01	328	327	3.6846	0.72019	260.19	291450	2404000	0	-5.3024	1	6.951	22.46	22.46	38.1	35.57	1.186	0	1.186	0	0	0	0		NaN	NaN	NaN	NaN
20140904-PurClathDigest-1ug-01	329	328	3.6966	0.69981	239.71	295660	2454800	0	-5.3024	1	6.963	22.6	22.6	38.14	35.61	1.182	0	1.182	0	0	0	0		NaN	NaN	NaN	NaN
20140904-PurClathDigest-1ug-01	330	329	3.7082	0.7606	284.74	257940	2185700	0	-5.3024	1	6.974	22.73	22.73	38.17	35.66	1.179	0	1.179	0	0	0	0		NaN	NaN	NaN	NaN
20140904-PurClathDigest-1ug-01	331	330	3.7209	0.69929	236.93	306480	2481500	0	-5.3024	1	6.986	22.87	22.87	38.21	35.7	1.175	0	1.175	0	0	0	0		NaN	NaN	NaN	NaN
20140904-PurClathDigest-1ug-01	332	331	3.7326	0.68001	223.85	301290	2525900	0	-5.3024	1	6.997	23.01	23.01	38.25	35.74	1.172	0	1.172	0	0	0	0		NaN	NaN	NaN	NaN
20140904-PurClathDigest-1ug-01	333	332	3.7439	0.7501	273.98	257820	2184200	0	-5.3024	1	7.007	23.14	23.14	38.28	35.78	1.168	0	1.168	0	0	0	0		NaN	NaN	NaN	NaN
20140904-PurClathDigest-1ug-01	334	333	3.7564	0.70999	252.12	263680	2266100	0	-5.3024	1	7.018	23.36	23.36	38.38	35.87	1.168	0	1.168	0	0	0	0		NaN	NaN	NaN	NaN
20140904-PurClathDigest-1ug-01	335	334	3.7682	0.70021	237.38	281220	2391700	0	-5.3024	1	7.026	23.64	23.64	38.51	36.01	1.171	0	1.171	0	0	0	0		NaN	NaN	NaN	NaN
20140904-PurClathDigest-1ug-01	336	335	3.7799	0.68979	232.48	287740	2444000	0	-5.3024	1	7.035	23.93	23.93	38.65	36.14	1.173	0	1.173	0	0	0	0		NaN	NaN	NaN	NaN
20140904-PurClathDigest-1ug-01	337	336	3.7914	0.65991	200.88	321170	2683200	0	-5.3024	1	7.043	24.2	24.2	38.78	36.27	1.175	0	1.175	0	0	0	0		NaN	NaN	NaN	NaN
20140904-PurClathDigest-1ug-01	338	337	3.8024	0.66	205.5	316660	2633100	0	-5.3024	1	7.051	24.47	24.47	38.91	36.39	1.178	0	1.178	0	0	0	0		NaN	NaN	NaN	NaN
20140904-PurClathDigest-1ug-01	339	338	3.8134	0.6601	198.02	328650	2812300	0	-5.3024	1	7.059	24.73	24.73	39.04	36.51	1.18	0	1.18	0	0	0	0		NaN	NaN	NaN	NaN
20140904-PurClathDigest-1ug-01	340	339	3.8244	0.68001	215.72	312360	2584200	0	-5.3024	1	7.067	25	25	39.16	36.64	1.182	0	1.182	0	0	0	0		NaN	NaN	NaN	NaN
20140904-PurClathDigest-1ug-01	341	340	3.8357	0.68999	236.03	282880	2403400	0	-5.3024	1	7.076	25.27	25.27	39.29	36.77	1.185	0	1.185	0	0	0	0		NaN	NaN	NaN	NaN
20140904-PurClathDigest-1ug-01	342	341	3.8472	0.66001	200.34	327890	2726000	0	-5.3024	1	7.084	25.55	25.55	39.43	36.89	1.187	0	1.187	0	0	0	0		NaN	NaN	NaN	NaN
20140904-PurClathDigest-1ug-01	343	342	3.8582	0.68989	229.84	293610	2472400	0	-5.3024	1	7.092	25.81	25.81	39.56	37.02	1.19	0	1.19	0	0	0	0		NaN	NaN	NaN	NaN
20140904-PurClathDigest-1ug-01	344	343	3.8697	0.66999	211.16	290680	2488000	0	-5.3024	1	7.1	26.09	26.09	39.69	37.15	1.192	0	1.192	0	0	0	0		NaN	NaN	NaN	NaN
20140904-PurClathDigest-1ug-01	345	344	3.8809	0.66001	204.46	328280	2657200	0	-5.3024	1	7.108	26.35	26.35	39.82	37.27	1.194	0	1.194	0	0	0	0		NaN	NaN	NaN	NaN
20140904-PurClathDigest-1ug-01	346	345	3.8919	0.67009	212.36	299080	2510100	0	-5.3024	1	7.116	26.62	26.62	39.95	37.4	1.197	0	1.197	0	0	0	0		NaN	NaN	NaN	NaN
20140904-PurClathDigest-1ug-01	347	346	3.9031	0.69001	233.33	287420	2398100	0	-5.3024	1	7.125	26.89	26.89	40.08	37.52	1.199	0	1.199	0	0	0	0		NaN	NaN	NaN	NaN
20140904-PurClathDigest-1ug-01	348	347	3.9146	0.65	192.6	303360	2618500	0	-5.3024	1	7.133	27.16	27.16	40.21	37.65	1.201	0	1.201	0	0	0	0		NaN	NaN	NaN	NaN
20140904-PurClathDigest-1ug-01	349	348	3.9254	0.67989	222.66	285560	2437400	0	-5.3024	1	7.141	27.43	27.43	40.33	37.77	1.204	0	1.204	0	0	0	0		NaN	NaN	NaN	NaN
20140904-PurClathDigest-1ug-01	350	349	3.9367	0.67001	210.67	321510	2593400	0	-5.3024	1	7.149	27.7	27.7	40.47	37.9	1.206	0	1.206	0	0	0	0		NaN	NaN	NaN	NaN
20140904-PurClathDigest-1ug-01	351	350	3.9479	0.6501	196.59	298000	2583600	0	-5.3024	1	7.157	27.97	27.97	40.59	38.03	1.209	0	1.209	0	0	0	0		NaN	NaN	NaN	NaN
20140904-PurClathDigest-1ug-01	352	351	3.9587	0.68001	221.73	303760	2529800	0	-5.3024	1	7.165	28.23	28.23	40.72	38.15	1.211	0	1.211	0	0	0	0		NaN	NaN	NaN	NaN
20140904-PurClathDigest-1ug-01	353	352	3.9701	0.66999	211.8	297360	2492300	0	-5.3024	1	7.173	28.5	28.5	40.85	38.28	1.213	0	1.213	0	0	0	0		NaN	NaN	NaN	NaN
20140904-PurClathDigest-1ug-01	354	353	3.9812	0.72001	258.36	260920	2203800	0	-5.3024	1	7.181	28.77	28.77	40.98	38.4	1.216	0	1.216	0	0	0	0		NaN	NaN	NaN	NaN
20140904-PurClathDigest-1ug-01	355	354	3.9932	0.66999	200.04	404140	2919100	0	-5.3024	1	7.19	29.06	29.06	41.12	38.54	1.218	0	1.218	0	0	0	0		NaN	NaN	NaN	NaN
20140904-PurClathDigest-1ug-01	356	355	4.0044	0.64991	188.17	331460	2761600	0	-5.3024	1	7.198	29.33	29.33	41.25	38.66	1.221	0	1.221	0	0	0	0		NaN	NaN	NaN	NaN
20140904-PurClathDigest-1ug-01	357	356	4.0152	0.65	190.77	339820	2770700	0	-5.3024	1	7.206	29.59	29.59	41.37	38.78	1.223	0	1.223	0	0	0	0		NaN	NaN	NaN	NaN
20140904-PurClathDigest-1ug-01	358	357	4.0261	0.68029	218.18	287170	2451700	0	-5.3024	1	7.214	29.85	29.85	41.5	38.91	1.225	0	1.225	0	0	0	0		NaN	NaN	NaN	NaN
20140904-PurClathDigest-1ug-01	359	358	4.0374	0.66979	206.96	301820	2558800	0	-5.3024	1	7.222	30.12	30.12	41.63	39.03	1.227	0	1.227	0	0	0	0		NaN	NaN	NaN	NaN
20140904-PurClathDigest-1ug-01	360	359	4.0486	0.68001	221.19	286930	2425900	0	-5.3024	1	7.23	30.39	30.39	41.76	39.16	1.23	0	1.23	0	0	0	0		NaN	NaN	NaN	NaN
20140904-PurClathDigest-1ug-01	361	360	4.0599	0.66991	209.93	297170	2479800	0	-5.3024	1	7.227	30.38	30.38	42.15	39.53	1.233	0	1.233	0	0	0	0		NaN	NaN	NaN	NaN
20140904-PurClathDigest-1ug-01	362	361	4.0711	0.65998	198.93	293720	2550700	0	-5.3024	1	7.221	30.34	30.34	42.56	39.94	1.237	0	1.237	0	0	0	0		NaN	NaN	NaN	NaN
20140904-PurClathDigest-1ug-01	363	362	4.0821	0.68001	221.24	293920	2418400	0	-5.3024	1	7.216	30.29	30.29	42.98	40.34	1.24	0	1.24	0	0	0	0		NaN	NaN	NaN	NaN
20140904-PurClathDigest-1ug-01	364	363	4.0934	0.67011	208.81	291880	2498000	0	-5.3024	1	7.21	30.25	30.25	43.4	40.75	1.244	0	1.244	0	0	0	0		NaN	NaN	NaN	NaN
20140904-PurClathDigest-1ug-01	365	364	4.1046	0.63	175.65	313930	2637500	0	-5.3024	1	7.205	30.2	30.2	43.82	41.16	1.247	0	1.247	0	0	0	0		NaN	NaN	NaN	NaN
20140904-PurClathDigest-1ug-01	366	365	4.1151	0.65998	203.08	303810	2612000	0	-5.3024	1	7.199	30.16	30.16	44.21	41.54	1.251	0	1.251	0	0	0	0		NaN	NaN	NaN	NaN
20140904-PurClathDigest-1ug-01	367	366	4.1261	0.65992	200.35	301230	2564700	0	-5.3024	1	7.194	30.12	30.12	44.62	41.94	1.254	0	1.254	0	0	0	0		NaN	NaN	NaN	NaN
20140904-PurClathDigest-1ug-01	368	367	4.1371	0.6401	176.55	351720	2837700	0	-5.3024	1	7.189	30.07	30.07	45.03	42.34	1.258	0	1.258	0	0	0	0		NaN	NaN	NaN	NaN
20140904-PurClathDigest-1ug-01	369	368	4.1477	0.67989	222.63	295380	2450400	0	-5.3024	1	7.183	30.03	30.03	45.43	42.73	1.261	0	1.261	0	0	0	0		NaN	NaN	NaN	NaN
20140904-PurClathDigest-1ug-01	370	369	4.1591	0.67011	215.67	287570	2497300	0	-5.3024	1	7.178	29.98	29.98	45.85	43.14	1.265	0	1.265	0	0	0	0		NaN	NaN	NaN	NaN
20140904-PurClathDigest-1ug-01	371	370	4.1702	0.67989	213.46	285880	2431300	0	-5.3024	1	7.172	29.94	29.94	46.27	43.55	1.268	0	1.268	0	0	0	0		NaN	NaN	NaN	NaN
20140904-PurClathDigest-1ug-01	372	371	4.1816	0.6601	201.43	298800	2542400	0	-5.3024	1	7.167	29.89	29.89	46.69	43.96	1.272	0	1.272	0	0	0	0		NaN	NaN	NaN	NaN
20140904-PurClathDigest-1ug-01	373	372	4.1926	0.65071	193.81	310890	2624200	0	-5.3024	1	7.161	29.85	29.85	47.1	44.36	1.275	0	1.275	0	0	0	0		NaN	NaN	NaN	NaN
20140904-PurClathDigest-1ug-01	374	373	4.2034	0.66919	209.96	297780	2505100	0	-5.3024	1	7.156	29.8	29.8	47.51	44.76	1.279	0	1.279	0	0	0	0		NaN	NaN	NaN	NaN
20140904-PurClathDigest-1ug-01	375	374	4.2146	0.70009	239.39	283690	2354000	0	-5.3024	1	7.15	29.76	29.76	47.92	45.16	1.282	0	1.282	0	0	0	0		NaN	NaN	NaN	NaN
20140904-PurClathDigest-1ug-01	376	375	4.2262	0.6399	184.66	327740	2695400	0	-5.3024	1	7.145	29.71	29.71	48.36	45.59	1.286	0	1.286	0	0	0	0		NaN	NaN	NaN	NaN
20140904-PurClathDigest-1ug-01	377	376	4.2369	0.67002	208.14	293790	2525000	0	-5.3024	1	7.139	29.67	29.67	48.76	45.98	1.289	0	1.289	0	0	0	0		NaN	NaN	NaN	NaN
20140904-PurClathDigest-1ug-01	378	377	4.2481	0.65	193.36	329140	2687800	0	-5.3024	1	7.134	29.62	29.62	49.18	46.38	1.293	0	1.293	0	0	0	0		NaN	NaN	NaN	NaN
20140904-PurClathDigest-1ug-01	379	378	4.2589	0.68009	220.88	291450	2468500	0	-5.3024	1	7.129	29.58	29.58	49.58	46.78	1.296	0	1.296	0	0	0	0		NaN	NaN	NaN	NaN
20140904-PurClathDigest-1ug-01	380	379	4.2702	0.6601	198.01	313580	2637200	0	-5.3024	1	7.123	29.54	29.54	50	47.19	1.3	0	1.3	0	0	0	0		NaN	NaN	NaN	NaN
20140904-PurClathDigest-1ug-01	381	380	4.2812	0.6498	190.79	325570	2706200	0	-5.3024	1	7.118	29.49	29.49	50.42	47.59	1.304	0	1.304	0	0	0	0		NaN	NaN	NaN	NaN
20140904-PurClathDigest-1ug-01	382	381	4.2921	0.67011	209.33	292480	2583800	0	-5.3024	1	7.112	29.45	29.45	50.82	47.99	1.307	0	1.307	0	0	0	0		NaN	NaN	NaN	NaN
20140904-PurClathDigest-1ug-01	383	382	4.3032	0.66991	206.63	300060	2603800	0	-5.3024	1	7.107	29.4	29.4	51.24	48.39	1.311	0	1.311	0	0	0	0		NaN	NaN	NaN	NaN
20140904-PurClathDigest-1ug-01	384	383	4.3144	0.69008	223.02	285610	2425700	0	-5.3024	1	7.101	29.36	29.36	51.65	48.8	1.314	0	1.314	0	0	0	0		NaN	NaN	NaN	NaN
20140904-PurClathDigest-1ug-01	385	384	4.3259	0.66001	201.97	304650	2584700	0	-5.3024	1	7.096	29.31	29.31	52.08	49.22	1.318	0	1.318	0	0	0	0		NaN	NaN	NaN	NaN
20140904-PurClathDigest-1ug-01	386	385	4.3369	0.68001	218.9	303980	2495700	0	-5.3024	1	7.09	29.27	29.27	52.49	49.62	1.321	0	1.321	0	0	0	0		NaN	NaN	NaN	NaN
20140904-PurClathDigest-1ug-01	387	386	4.3482	0.65998	198.74	316160	2640500	0	-5.3024	1	7.085	29.22	29.22	52.92	50.03	1.325	0	1.325	0	0	0	0		NaN	NaN	NaN	NaN
20140904-PurClathDigest-1ug-01	388	387	4.3592	0.69002	234.99	291050	2490900	0	-5.3024	1	7.078	29.58	29.58	53.18	50.29	1.327	0	1.327	0	0	0	0		NaN	NaN	NaN	NaN
20140904-PurClathDigest-1ug-01	389	388	4.3707	0.67989	224.71	292250	2485700	0	-5.3024	1	7.071	30.04	30.04	53.43	50.54	1.329	0	1.329	0	0	0	0		NaN	NaN	NaN	NaN
20140904-PurClathDigest-1ug-01	390	389	4.3821	0.66001	195.77	320960	2715200	0	-5.3024	1	7.064	30.49	30.49	53.67	50.78	1.33	0	1.33	0	0	0	0		NaN	NaN	NaN	NaN
20140904-PurClathDigest-1ug-01	391	390	4.3931	0.63008	167.29	384460	3069800	0	-5.3024	1	7.058	30.93	30.93	53.91	51.01	1.332	0	1.332	0	0	0	0		NaN	NaN	NaN	NaN
20140904-PurClathDigest-1ug-01	392	391	4.4036	0.66001	197.19	335470	2850300	0	-5.3024	1	7.051	31.35	31.35	54.13	51.24	1.334	0	1.334	0	0	0	0		NaN	NaN	NaN	NaN
20140904-PurClathDigest-1ug-01	393	392	4.4146	0.66991	206.65	331150	2726600	0	-5.3024	1	7.045	31.79	31.79	54.37	51.47	1.336	0	1.336	0	0	0	0		NaN	NaN	NaN	NaN
20140904-PurClathDigest-1ug-01	394	393	4.4257	0.67998	221.35	306900	2561400	0	-5.3024	1	7.038	32.24	32.24	54.6	51.71	1.337	0	1.337	0	0	0	0		NaN	NaN	NaN	NaN
20140904-PurClathDigest-1ug-01	395	394	4.4371	0.6401	181.35	357070	2973000	0	-5.3024	1	7.031	32.69	32.69	54.85	51.95	1.339	0	1.339	0	0	0	0		NaN	NaN	NaN	NaN
20140904-PurClathDigest-1ug-01	396	395	4.4477	0.67992	221.43	303900	2563200	0	-5.3024	1	7.024	33.11	33.11	55.08	52.18	1.341	0	1.341	0	0	0	0		NaN	NaN	NaN	NaN
20140904-PurClathDigest-1ug-01	397	396	4.4591	0.68009	216.01	310900	2679300	0	-5.3024	1	7.018	33.57	33.57	55.32	52.42	1.343	0	1.343	0	0	0	0		NaN	NaN	NaN	NaN
20140904-PurClathDigest-1ug-01	398	397	4.4704	0.66999	210.1	298130	2628100	0	-5.3024	1	7.011	34.02	34.02	55.56	52.67	1.345	0	1.345	0	0	0	0		NaN	NaN	NaN	NaN
20140904-PurClathDigest-1ug-01	399	398	4.4816	0.66999	215.67	315200	2720100	0	-5.3024	1	7.004	34.46	34.46	55.8	52.9	1.346	0	1.346	0	0	0	0		NaN	NaN	NaN	NaN
20140904-PurClathDigest-1ug-01	400	399	4.4927	0.67989	220.7	330750	2759100	0	-5.3024	1	6.997	34.91	34.91	56.04	53.14	1.348	0	1.348	0	0	0	0		NaN	NaN	NaN	NaN
20140904-PurClathDigest-1ug-01	401	400	4.5041	0.69011	225.33	310920	2656600	0	-5.3024	1	6.99	35.36	35.36	56.28	53.38	1.35	0	1.35	0	0	0	0		NaN	NaN	NaN	NaN
20140904-PurClathDigest-1ug-01	402	401	4.5156	0.6399	180.49	369220	3070800	0	-5.3024	1	6.983	35.82	35.82	56.53	53.63	1.352	0	1.352	0	0	0	0		NaN	NaN	NaN	NaN
20140904-PurClathDigest-1ug-01	403	402	4.5262	0.65011	186.92	335120	2842300	0	-5.3024	1	6.977	36.25	36.25	56.76	53.86	1.353	0	1.353	0	0	0	0		NaN	NaN	NaN	NaN
20140904-PurClathDigest-1ug-01	404	403	4.5371	0.64001	180.8	373030	3098300	0	-5.3024	1	6.97	36.68	36.68	56.99	54.09	1.355	0	1.355	0	0	0	0		NaN	NaN	NaN	NaN
20140904-PurClathDigest-1ug-01	405	404	4.5477	0.69998	241.58	287220	2550600	0	-5.3024	1	6.964	37.1	37.1	57.22	54.32	1.357	0	1.357	0	0	0	0		NaN	NaN	NaN	NaN
20140904-PurClathDigest-1ug-01	406	405	4.5594	0.64001	182.8	350600	2968400	0	-5.3024	1	6.957	37.57	37.57	57.47	54.57	1.359	0	1.359	0	0	0	0		NaN	NaN	NaN	NaN
20140904-PurClathDigest-1ug-01	407	406	4.5701	0.64991	183.6	386940	3069000	0	-5.3024	1	6.95	37.99	37.99	57.69	54.79	1.36	0	1.36	0	0	0	0		NaN	NaN	NaN	NaN
20140904-PurClathDigest-1ug-01	408	407	4.5809	0.63	173.09	375610	3187400	0	-5.3024	1	6.944	38.43	38.43	57.93	55.02	1.362	0	1.362	0	0	0	0		NaN	NaN	NaN	NaN
20140904-PurClathDigest-1ug-01	409	408	4.5914	0.63	168.97	382050	3367800	0	-5.3024	1	6.937	38.85	38.85	58.15	55.25	1.364	0	1.364	0	0	0	0		NaN	NaN	NaN	NaN
20140904-PurClathDigest-1ug-01	410	409	4.6019	0.65	187.17	328890	2947900	0	-5.3024	1	6.931	39.27	39.27	58.38	55.47	1.365	0	1.365	0	0	0	0		NaN	NaN	NaN	NaN
20140904-PurClathDigest-1ug-01	411	410	4.6127	0.69011	227.14	293550	2594300	0	-5.3024	1	6.924	39.7	39.7	58.61	55.7	1.367	0	1.367	0	0	0	0		NaN	NaN	NaN	NaN
20140904-PurClathDigest-1ug-01	412	411	4.6242	0.65989	202	308980	2717600	0	-5.3024	1	6.917	40.16	40.16	58.85	55.95	1.369	0	1.369	0	0	0	0		NaN	NaN	NaN	NaN
20140904-PurClathDigest-1ug-01	413	412	4.6352	0.68999	228.01	291370	2562300	0	-5.3024	1	6.911	40.6	40.6	59.09	56.18	1.371	0	1.371	0	0	0	0		NaN	NaN	NaN	NaN
20140904-PurClathDigest-1ug-01	414	413	4.6467	0.66999	204.17	316600	2783300	0	-5.3024	1	6.904	41.05	41.05	59.33	56.43	1.372	0	1.372	0	0	0	0		NaN	NaN	NaN	NaN
20140904-PurClathDigest-1ug-01	415	414	4.6579	0.6401	181.5	376030	3220100	0	-5.3024	1	6.917	41.38	41.38	59.51	56.6	1.376	0	1.376	0	0	0	0		NaN	NaN	NaN	NaN
20140904-PurClathDigest-1ug-01	416	415	4.6686	0.66001	199.32	332520	2881200	0	-5.3024	1	6.938	41.64	41.64	59.64	56.73	1.379	0	1.379	0	0	0	0		NaN	NaN	NaN	NaN
20140904-PurClathDigest-1ug-01	417	416	4.6796	0.68001	215.92	300700	2660300	0	-5.3024	1	6.959	41.91	41.91	59.79	56.86	1.383	0	1.383	0	0	0	0		NaN	NaN	NaN	NaN
20140904-PurClathDigest-1ug-01	418	417	4.6909	0.70991	253.94	273140	2407600	0	-5.3024	1	6.981	42.19	42.19	59.93	57	1.387	0	1.387	0	0	0	0		NaN	NaN	NaN	NaN
20140904-PurClathDigest-1ug-01	419	418	4.7027	0.66999	207.85	302110	2678400	0	-5.3024	1	7.004	42.48	42.48	60.09	57.14	1.391	0	1.391	0	0	0	0		NaN	NaN	NaN	NaN
20140904-PurClathDigest-1ug-01	420	419	4.7139	0.66001	200.14	317430	2753400	0	-5.3024	1	7.026	42.76	42.76	60.23	57.28	1.395	0	1.395	0	0	0	0		NaN	NaN	NaN	NaN
20140904-PurClathDigest-1ug-01	421	420	4.7249	0.68009	217.99	303650	2670300	0	-5.3024	1	7.047	43.03	43.03	60.37	57.41	1.399	0	1.399	0	0	0	0		NaN	NaN	NaN	NaN
20140904-PurClathDigest-1ug-01	422	421	4.7362	0.68999	228.75	284990	2567300	0	-5.3024	1	7.07	43.31	43.31	60.52	57.55	1.403	0	1.403	0	0	0	0		NaN	NaN	NaN	NaN
20140904-PurClathDigest-1ug-01	423	422	4.7477	0.68001	220.32	294590	2594400	0	-5.3024	1	7.092	43.59	43.59	60.67	57.69	1.407	0	1.407	0	0	0	0		NaN	NaN	NaN	NaN
20140904-PurClathDigest-1ug-01	424	423	4.7591	0.6607	203	322210	2794900	0	-5.3024	1	7.114	43.87	43.87	60.81	57.83	1.411	0	1.411	0	0	0	0		NaN	NaN	NaN	NaN
20140904-PurClathDigest-1ug-01	425	424	4.7701	0.66919	212.68	300850	2675400	0	-5.3024	1	7.135	44.14	44.14	60.95	57.96	1.414	0	1.414	0	0	0	0		NaN	NaN	NaN	NaN
20140904-PurClathDigest-1ug-01	426	425	4.7812	0.64001	184.07	315460	2859900	0	-5.3024	1	7.157	44.41	44.41	61.1	58.1	1.418	0	1.418	0	0	0	0		NaN	NaN	NaN	NaN
20140904-PurClathDigest-1ug-01	427	426	4.7919	0.69008	223.64	331040	2707700	0	-5.3024	1	7.178	44.67	44.67	61.24	58.23	1.422	0	1.422	0	0	0	0		NaN	NaN	NaN	NaN
20140904-PurClathDigest-1ug-01	428	427	4.8034	0.65002	186.74	328820	2862500	0	-5.3024	1	7.2	44.96	44.96	61.39	58.37	1.426	0	1.426	0	0	0	0		NaN	NaN	NaN	NaN
20140904-PurClathDigest-1ug-01	429	428	4.8142	0.67998	226.15	292080	2594600	0	-5.3024	1	7.221	45.22	45.22	61.52	58.5	1.429	0	1.429	0	0	0	0		NaN	NaN	NaN	NaN
20140904-PurClathDigest-1ug-01	430	429	4.8256	0.65	183.86	348190	2961400	0	-5.3024	1	7.243	45.5	45.5	61.67	58.64	1.433	0	1.433	0	0	0	0		NaN	NaN	NaN	NaN
20140904-PurClathDigest-1ug-01	431	430	4.8364	0.67002	212.89	306200	2734600	0	-5.3024	1	7.264	45.77	45.77	61.81	58.77	1.437	0	1.437	0	0	0	0		NaN	NaN	NaN	NaN
20140904-PurClathDigest-1ug-01	432	431	4.8476	0.67989	211.86	305930	2715900	0	-5.3024	1	7.286	46.04	46.04	61.96	58.9	1.441	0	1.441	0	0	0	0		NaN	NaN	NaN	NaN
20140904-PurClathDigest-1ug-01	433	432	4.8589	0.6607	194.94	327510	2880700	0	-5.3024	1	7.308	46.32	46.32	62.1	59.04	1.445	0	1.445	0	0	0	0		NaN	NaN	NaN	NaN
20140904-PurClathDigest-1ug-01	434	433	4.8699	0.68959	232.49	301310	2647000	0	-5.3024	1	7.33	46.59	46.59	62.24	59.18	1.449	0	1.449	0	0	0	0		NaN	NaN	NaN	NaN
20140904-PurClathDigest-1ug-01	435	434	4.8814	0.67981	219.6	294960	2628200	0	-5.3024	1	7.352	46.88	46.88	62.39	59.32	1.453	0	1.453	0	0	0	0		NaN	NaN	NaN	NaN
20140904-PurClathDigest-1ug-01	436	435	4.8927	0.66001	198.44	317450	2838400	0	-5.3024	1	7.374	47.16	47.16	62.54	59.45	1.456	0	1.456	0	0	0	0		NaN	NaN	NaN	NaN
20140904-PurClathDigest-1ug-01	437	436	4.9037	0.70988	252.56	300090	2550900	0	-5.3024	1	7.395	47.43	47.43	62.68	59.59	1.46	0	1.46	0	0	0	0		NaN	NaN	NaN	NaN
20140904-PurClathDigest-1ug-01	438	437	4.9156	0.64001	187.21	335510	3012200	0	-5.3024	1	7.418	47.72	47.72	62.83	59.73	1.464	0	1.464	0	0	0	0		NaN	NaN	NaN	NaN
20140904-PurClathDigest-1ug-01	439	438	4.9262	0.70009	234.25	294860	2642300	0	-5.3024	1	7.439	47.98	47.98	62.97	59.86	1.468	0	1.468	0	0	0	0		NaN	NaN	NaN	NaN
20140904-PurClathDigest-1ug-01	440	439	4.9379	0.68001	223.61	292370	2670100	0	-5.3024	1	7.462	48.27	48.27	63.12	60	1.472	0	1.472	0	0	0	0		NaN	NaN	NaN	NaN
20140904-PurClathDigest-1ug-01	441	440	4.9492	0.65	187.62	337670	2940900	0	-5.3024	1	7.484	48.54	48.54	63.27	60.14	1.476	0	1.476	0	0	0	0		NaN	NaN	NaN	NaN
20140904-PurClathDigest-1ug-01	442	441	4.9601	0.70001	233.23	291620	2611900	0	-5.3024	1	7.525	48.6	48.6	63.37	60.23	1.478	0	1.478	0	0	0	0		NaN	NaN	NaN	NaN
20140904-PurClathDigest-1ug-01	443	442	4.9717	0.66991	206.15	333390	2878500	0	-5.3024	1	7.571	48.65	48.65	63.47	60.33	1.48	0	1.48	0	0	0	0		NaN	NaN	NaN	NaN
20140904-PurClathDigest-1ug-01	444	443	4.9829	0.66999	210.79	308030	2783800	0	-5.3024	1	7.615	48.7	48.7	63.57	60.42	1.481	0	1.481	0	0	0	0		NaN	NaN	NaN	NaN
20140904-PurClathDigest-1ug-01	445	444	4.9941	0.66999	207.7	324760	2836600	0	-5.3024	1	7.659	48.74	48.74	63.67	60.51	1.483	0	1.483	0	0	0	0		NaN	NaN	NaN	NaN
20140904-PurClathDigest-1ug-01	446	445	5.0052	0.70009	241.08	296180	2648400	0	-5.3024	1	7.703	48.79	48.79	63.77	60.6	1.485	0	1.485	0	0	0	0		NaN	NaN	NaN	NaN
20140904-PurClathDigest-1ug-01	447	446	5.0169	0.66001	199.84	352500	3087000	0	-5.3024	1	7.749	48.83	48.83	63.87	60.69	1.487	0	1.487	0	0	0	0		NaN	NaN	NaN	NaN
20140904-PurClathDigest-1ug-01	448	447	5.0279	0.65	186.11	385870	3326100	0	-5.3024	1	7.792	48.88	48.88	63.97	60.78	1.489	0	1.489	0	0	0	0		NaN	NaN	NaN	NaN
20140904-PurClathDigest-1ug-01	449	448	5.0387	0.65	189.29	354190	3113200	0	-5.3024	1	7.835	48.92	48.92	64.07	60.87	1.49	0	1.49	0	0	0	0		NaN	NaN	NaN	NaN
20140904-PurClathDigest-1ug-01	450	449	5.0496	0.64991	187.7	355840	3181100	0	-5.3024	1	7.878	48.96	48.96	64.17	60.96	1.492	0	1.492	0	0	0	0		NaN	NaN	NaN	NaN
20140904-PurClathDigest-1ug-01	451	450	5.0604	0.64001	186.38	372390	3284700	0	-5.3024	1	7.92	49.01	49.01	64.26	61.04	1.494	0	1.494	0	0	0	0		NaN	NaN	NaN	NaN
20140904-PurClathDigest-1ug-01	452	451	5.0711	0.65	192.28	352280	3046000	0	-5.3024	1	7.962	49.05	49.05	64.36	61.13	1.495	0	1.495	0	0	0	0		NaN	NaN	NaN	NaN
20140904-PurClathDigest-1ug-01	453	452	5.0819	0.67008	212.08	332210	2965700	0	-5.3024	1	8.005	49.09	49.09	64.45	61.22	1.497	0	1.497	0	0	0	0		NaN	NaN	NaN	NaN
20140904-PurClathDigest-1ug-01	454	453	5.0931	0.67992	219.12	317260	2874800	0	-5.3024	1	8.049	49.14	49.14	64.55	61.31	1.499	0	1.499	0	0	0	0		NaN	NaN	NaN	NaN
20140904-PurClathDigest-1ug-01	455	454	5.1044	0.67019	205.1	324060	2899200	0	-5.3024	1	8.094	49.18	49.18	64.65	61.4	1.501	0	1.501	0	0	0	0		NaN	NaN	NaN	NaN
20140904-PurClathDigest-1ug-01	456	455	5.1156	0.63981	180.79	361600	3199200	0	-5.3024	1	8.138	49.23	49.23	64.75	61.49	1.502	0	1.502	0	0	0	0		NaN	NaN	NaN	NaN
20140904-PurClathDigest-1ug-01	457	456	5.1262	0.67008	216.8	322030	2886600	0	-5.3024	1	8.18	49.27	49.27	64.85	61.58	1.504	0	1.504	0	0	0	0		NaN	NaN	NaN	NaN
20140904-PurClathDigest-1ug-01	458	457	5.1374	0.6399	184.02	373690	3368600	0	-5.3024	1	8.224	49.31	49.31	64.95	61.67	1.506	0	1.506	0	0	0	0		NaN	NaN	NaN	NaN
20140904-PurClathDigest-1ug-01	459	458	5.1481	0.63	164.4	392650	3620000	0	-5.3024	1	8.266	49.36	49.36	65.04	61.75	1.508	0	1.508	0	0	0	0		NaN	NaN	NaN	NaN
20140904-PurClathDigest-1ug-01	460	459	5.1586	0.6316	171.78	398350	3706600	0	-5.3024	1	8.307	49.4	49.4	65.14	61.84	1.509	0	1.509	0	0	0	0		NaN	NaN	NaN	NaN
20140904-PurClathDigest-1ug-01	461	460	5.1691	0.63841	181.94	397600	3747700	0	-5.3024	1	8.348	49.44	49.44	65.23	61.92	1.511	0	1.511	0	0	0	0		NaN	NaN	NaN	NaN
20140904-PurClathDigest-1ug-01	462	461	5.1797	0.63011	172.88	433770	4254000	0	-5.3024	1	8.39	49.48	49.48	65.33	62.01	1.513	0	1.513	0	0	0	0		NaN	NaN	NaN	NaN
20140904-PurClathDigest-1ug-01	463	462	5.1902	0.63998	168.17	448160	4381600	0	-5.3024	1	8.432	49.53	49.53	65.42	62.1	1.514	0	1.514	0	0	0	0		NaN	NaN	NaN	NaN
20140904-PurClathDigest-1ug-01	464	463	5.2009	0.62991	172.02	595680	4673800	0	-5.3024	1	8.474	49.57	49.57	65.51	62.18	1.516	0	1.516	0	0	0	0		NaN	NaN	NaN	NaN
20140904-PurClathDigest-1ug-01	465	464	5.2114	0.6201	151.36	476140	4902600	0	-5.3024	1	8.515	49.61	49.61	65.61	62.27	1.518	0	1.518	0	0	0	0		NaN	NaN	NaN	NaN
20140904-PurClathDigest-1ug-01	466	465	5.2217	0.65	195.47	373390	3800700	0	-5.3024	1	8.556	49.65	49.65	65.7	62.35	1.519	0	1.519	0	0	0	0		NaN	NaN	NaN	NaN
20140904-PurClathDigest-1ug-01	467	466	5.2326	0.65989	199.79	355360	3621800	0	-5.3024	1	8.598	49.7	49.7	65.8	62.44	1.521	0	1.521	0	0	0	0		NaN	NaN	NaN	NaN
20140904-PurClathDigest-1ug-01	468	467	5.2436	0.66012	202.93	355150	3569500	0	-5.3024	1	8.642	49.74	49.74	65.89	62.53	1.523	0	1.523	0	0	0	0		NaN	NaN	NaN	NaN
20140904-PurClathDigest-1ug-01	469	468	5.2546	0.72988	270.61	315600	3103200	0	-5.3024	1	8.693	49.93	49.93	65.98	62.61	1.526	0	1.526	0	0	0	0		NaN	NaN	NaN	NaN
20140904-PurClathDigest-1ug-01	470	469	5.2667	0.70012	239.73	330590	3297600	0	-5.3024	1	8.763	50.38	50.38	66.07	62.67	1.533	0	1.533	0	0	0	0		NaN	NaN	NaN	NaN
20140904-PurClathDigest-1ug-01	471	470	5.2784	0.72988	268.04	312030	3083100	0	-5.3024	1	8.829	50.8	50.8	66.15	62.74	1.539	0	1.539	0	0	0	0		NaN	NaN	NaN	NaN
20140904-PurClathDigest-1ug-01	472	471	5.2906	0.72012	257.81	321240	3098700	0	-5.3024	1	8.898	51.25	51.25	66.23	62.81	1.545	0	1.545	0	0	0	0		NaN	NaN	NaN	NaN
20140904-PurClathDigest-1ug-01	473	472	5.3026	0.74999	286.71	281960	2809500	0	-5.3024	1	8.967	51.68	51.68	66.31	62.88	1.552	0	1.552	0	0	0	0		NaN	NaN	NaN	NaN
20140904-PurClathDigest-1ug-01	474	473	5.3151	0.71002	253.87	294570	2973800	0	-5.3024	1	9.038	52.14	52.14	66.4	62.95	1.558	0	1.558	0	0	0	0		NaN	NaN	NaN	NaN
20140904-PurClathDigest-1ug-01	475	474	5.3269	0.70999	249.57	323620	3125700	0	-5.3024	1	9.106	52.57	52.57	66.48	63.01	1.564	0	1.564	0	0	0	0		NaN	NaN	NaN	NaN
20140904-PurClathDigest-1ug-01	476	475	5.3387	0.73989	275.56	282990	2860000	0	-5.3024	1	9.173	53	53	66.56	63.08	1.571	0	1.571	0	0	0	0		NaN	NaN	NaN	NaN
20140904-PurClathDigest-1ug-01	477	476	5.3511	0.77002	312.56	271510	2677700	0	-5.3024	1	9.243	53.46	53.46	66.64	63.15	1.577	0	1.577	0	0	0	0		NaN	NaN	NaN	NaN
20140904-PurClathDigest-1ug-01	478	477	5.3639	0.78009	315.48	278510	2730500	0	-5.3024	1	9.317	53.92	53.92	66.73	63.22	1.584	0	1.584	0	0	0	0		NaN	NaN	NaN	NaN
20140904-PurClathDigest-1ug-01	479	478	5.3769	0.77002	286.06	295960	2878700	0	-5.3024	1	9.391	54.4	54.4	66.82	63.29	1.591	0	1.591	0	0	0	0		NaN	NaN	NaN	NaN
20140904-PurClathDigest-1ug-01	480	479	5.3897	0.70988	251.18	336020	3282000	0	-5.3024	1	9.464	54.87	54.87	66.91	63.37	1.598	0	1.598	0	0	0	0		NaN	NaN	NaN	NaN
20140904-PurClathDigest-1ug-01	481	480	5.4016	0.75002	291.08	296530	2903600	0	-5.3024	1	9.531	55.3	55.3	66.99	63.43	1.604	0	1.604	0	0	0	0		NaN	NaN	NaN	NaN
20140904-PurClathDigest-1ug-01	482	481	5.4141	0.72009	255.2	348120	3284200	0	-5.3024	1	9.603	55.75	55.75	67.08	63.5	1.611	0	1.611	0	0	0	0		NaN	NaN	NaN	NaN
20140904-PurClathDigest-1ug-01	483	482	5.4261	0.77991	317.03	270990	2703700	0	-5.3024	1	9.671	56.19	56.19	67.16	63.57	1.617	0	1.617	0	0	0	0		NaN	NaN	NaN	NaN
20140904-PurClathDigest-1ug-01	484	483	5.4391	0.74009	285.78	270170	2766000	0	-5.3024	1	9.745	56.67	56.67	67.25	63.64	1.624	0	1.624	0	0	0	0		NaN	NaN	NaN	NaN
20140904-PurClathDigest-1ug-01	485	484	5.4514	0.80998	349.73	245300	2479200	0	-5.3024	1	9.816	57.12	57.12	67.33	63.71	1.63	0	1.63	0	0	0	0		NaN	NaN	NaN	NaN
20140904-PurClathDigest-1ug-01	486	485	5.4649	0.80993	354.12	286540	2642000	0	-5.3024	1	9.893	57.61	57.61	67.42	63.79	1.638	0	1.638	0	0	0	0		NaN	NaN	NaN	NaN
20140904-PurClathDigest-1ug-01	487	486	5.4784	0.80009	331.45	277870	2675700	0	-5.3024	1	9.97	58.1	58.1	67.52	63.87	1.645	0	1.645	0	0	0	0		NaN	NaN	NaN	NaN
20140904-PurClathDigest-1ug-01	488	487	5.4917	0.77002	312.83	267840	2666400	0	-5.3024	1	10.05	58.59	58.59	67.61	63.94	1.652	0	1.652	0	0	0	0		NaN	NaN	NaN	NaN
20140904-PurClathDigest-1ug-01	489	488	5.5046	0.82998	369.34	248140	2453400	0	-5.3024	1	10.12	59.06	59.06	67.7	64.01	1.658	0	1.658	0	0	0	0		NaN	NaN	NaN	NaN
20140904-PurClathDigest-1ug-01	490	489	5.5184	0.83001	368.86	234610	2390500	0	-5.3024	1	10.2	59.56	59.56	67.79	64.09	1.666	0	1.666	0	0	0	0		NaN	NaN	NaN	NaN
20140904-PurClathDigest-1ug-01	491	490	5.5322	0.8299	364.65	249380	2491200	0	-5.3024	1	10.28	60.07	60.07	67.89	64.17	1.673	0	1.673	0	0	0	0		NaN	NaN	NaN	NaN
20140904-PurClathDigest-1ug-01	492	491	5.5461	0.87001	406.62	218770	2241500	0	-5.3024	1	10.36	60.57	60.57	67.98	64.25	1.68	0	1.68	0	0	0	0		NaN	NaN	NaN	NaN
20140904-PurClathDigest-1ug-01	493	492	5.5606	0.8101	352.73	254820	2564900	0	-5.3024	1	10.42	60.95	60.95	68.02	64.28	1.687	0	1.687	0	0	0	0		NaN	NaN	NaN	NaN
20140904-PurClathDigest-1ug-01	494	493	5.5741	0.82	352.29	266950	2588600	0	-5.3024	1	10.47	61.26	61.26	68.05	64.29	1.692	0	1.692	0	0	0	0		NaN	NaN	NaN	NaN
20140904-PurClathDigest-1ug-01	495	494	5.5877	0.82008	362.91	250980	2534600	0	-5.3024	1	10.53	61.56	61.56	68.07	64.29	1.698	0	1.698	0	0	0	0		NaN	NaN	NaN	NaN
20140904-PurClathDigest-1ug-01	496	495	5.6014	0.8299	371.48	239060	2439000	0	-5.3024	1	10.58	61.87	61.87	68.09	64.3	1.703	0	1.703	0	0	0	0		NaN	NaN	NaN	NaN
20140904-PurClathDigest-1ug-01	497	496	5.6152	0.79991	333.69	277900	2696800	0	-5.3024	1	10.63	62.18	62.18	68.11	64.31	1.708	0	1.708	0	0	0	0		NaN	NaN	NaN	NaN
20140904-PurClathDigest-1ug-01	498	497	5.6286	0.84	386.21	248900	2471300	0	-5.3024	1	10.69	62.48	62.48	68.13	64.32	1.714	0	1.714	0	0	0	0		NaN	NaN	NaN	NaN
20140904-PurClathDigest-1ug-01	499	498	5.6426	0.8101	332.41	256620	2606400	0	-5.3024	1	10.74	62.79	62.79	68.16	64.33	1.719	0	1.719	0	0	0	0		NaN	NaN	NaN	NaN
20140904-PurClathDigest-1ug-01	500	499	5.6561	0.81001	344.71	262770	2606800	0	-5.3024	1	10.79	63.1	63.1	68.18	64.34	1.725	0	1.725	0	0	0	0		NaN	NaN	NaN	NaN
20140904-PurClathDigest-1ug-01	501	500	5.6696	0.82998	372.58	239230	2455000	0	-5.3024	1	10.85	63.4	63.4	68.2	64.35	1.73	0	1.73	0	0	0	0		NaN	NaN	NaN	NaN
20140904-PurClathDigest-1ug-01	502	501	5.6834	0.83991	385.1	238680	2438600	0	-5.3024	1	10.9	63.71	63.71	68.22	64.35	1.735	0	1.735	0	0	0	0		NaN	NaN	NaN	NaN
20140904-PurClathDigest-1ug-01	503	502	5.6974	0.84	380.52	250720	2555500	0	-5.3024	1	10.95	64.02	64.02	68.25	64.36	1.741	0	1.741	0	0	0	0		NaN	NaN	NaN	NaN
20140904-PurClathDigest-1ug-01	504	503	5.7114	0.8101	348.24	257430	2585600	0	-5.3024	1	11.01	64.34	64.34	68.27	64.37	1.747	0	1.747	0	0	0	0		NaN	NaN	NaN	NaN
20140904-PurClathDigest-1ug-01	505	504	5.7249	0.82	359.51	245140	2513700	0	-5.3024	1	11.06	64.64	64.64	68.29	64.38	1.752	0	1.752	0	0	0	0		NaN	NaN	NaN	NaN
20140904-PurClathDigest-1ug-01	506	505	5.7386	0.85959	393.05	237020	2403600	0	-5.3024	1	11.12	64.95	64.95	68.31	64.39	1.757	0	1.757	0	0	0	0		NaN	NaN	NaN	NaN
20140904-PurClathDigest-1ug-01	507	506	5.7529	0.87029	416.17	218460	2243600	0	-5.3024	1	11.17	65.27	65.27	68.34	64.4	1.763	0	1.763	0	0	0	0		NaN	NaN	NaN	NaN
20140904-PurClathDigest-1ug-01	508	507	5.7674	0.88002	419.97	222490	2316500	0	-5.3024	1	11.23	65.59	65.59	68.36	64.41	1.769	0	1.769	0	0	0	0		NaN	NaN	NaN	NaN
20140904-PurClathDigest-1ug-01	509	508	5.7821	0.86008	397.72	231040	2322800	0	-5.3024	1	11.29	65.92	65.92	68.38	64.42	1.775	0	1.775	0	0	0	0		NaN	NaN	NaN	NaN
20140904-PurClathDigest-1ug-01	510	509	5.7964	0.94002	485.69	198980	2040300	0	-5.3024	1	11.34	66.24	66.24	68.41	64.43	1.78	0	1.78	0	0	0	0		NaN	NaN	NaN	NaN
20140904-PurClathDigest-1ug-01	511	510	5.8121	0.87999	425.75	236220	2319900	0	-5.3024	1	11.4	66.59	66.59	68.43	64.44	1.787	0	1.787	0	0	0	0		NaN	NaN	NaN	NaN
20140904-PurClathDigest-1ug-01	512	511	5.8267	0.9599	500	189460	1982400	0	-5.3024	1	11.46	66.92	66.92	68.45	64.45	1.792	0	1.792	0	0	0	0		NaN	NaN	NaN	NaN
20140904-PurClathDigest-1ug-01	513	512	5.8427	0.80998	348.08	249380	2569600	0	-5.3024	1	11.52	67.28	67.28	68.48	64.46	1.799	0	1.799	0	0	0	0		NaN	NaN	NaN	NaN
20140904-PurClathDigest-1ug-01	514	513	5.8562	0.91012	453.4	226570	2278200	0	-5.3024	1	11.57	67.42	67.42	68.48	64.43	1.805	0	1.805	0	0	0	0		NaN	NaN	NaN	NaN
20140904-PurClathDigest-1ug-01	515	514	5.8714	0.90961	429.09	221290	2270200	0	-5.3024	1	11.62	67.37	67.37	68.44	64.37	1.813	0	1.813	0	0	0	0		NaN	NaN	NaN	NaN
20140904-PurClathDigest-1ug-01	516	515	5.8866	0.90028	437.71	241100	2302500	0	-5.3024	1	11.67	67.31	67.31	68.4	64.31	1.821	0	1.821	0	0	0	0		NaN	NaN	NaN	NaN
20140904-PurClathDigest-1ug-01	517	516	5.9016	0.88002	424.34	255240	2431200	0	-5.3024	1	11.72	67.25	67.25	68.36	64.25	1.829	0	1.829	0	0	0	0		NaN	NaN	NaN	NaN
20140904-PurClathDigest-1ug-01	518	517	5.9162	0.87009	405.43	215980	2250900	0	-5.3024	1	11.76	67.2	67.2	68.32	64.19	1.837	0	1.837	0	0	0	0		NaN	NaN	NaN	NaN
20140904-PurClathDigest-1ug-01	519	518	5.9307	0.91999	463.3	222110	2251700	0	-5.3024	1	11.81	67.14	67.14	68.28	64.13	1.844	0	1.844	0	0	0	0		NaN	NaN	NaN	NaN
20140904-PurClathDigest-1ug-01	520	519	5.9461	0.9199	457.43	199940	2078600	0	-5.3024	1	11.86	67.09	67.09	68.24	64.06	1.852	0	1.852	0	0	0	0		NaN	NaN	NaN	NaN
20140904-PurClathDigest-1ug-01	521	520	5.9614	0.95999	500	171130	1866400	0	-5.3024	1	11.91	67.03	67.03	68.2	64	1.861	0	1.861	0	0	0	0		NaN	NaN	NaN	NaN
20140904-PurClathDigest-1ug-01	522	521	5.9774	0.9601	500	180700	1948600	0	-5.3024	1	11.96	66.97	66.97	68.16	63.93	1.869	0	1.869	0	0	0	0		NaN	NaN	NaN	NaN
20140904-PurClathDigest-1ug-01	523	522	5.9934	0.90992	450.65	203160	2109200	0	-5.3024	1	12.01	66.91	66.91	68.12	63.87	1.877	0	1.877	0	0	0	0		NaN	NaN	NaN	NaN
20140904-PurClathDigest-1ug-01	524	523	6.0086	0.80029	334.92	259510	2618800	0	-5.3024	1	12.06	66.85	66.85	68.08	63.81	1.885	0	1.885	0	0	0	0		NaN	NaN	NaN	NaN
20140904-PurClathDigest-1ug-01	525	524	6.0219	0.91979	460.46	207370	2150800	0	-5.3024	1	12.11	66.8	66.8	68.05	63.75	1.893	0	1.893	0	0	0	0		NaN	NaN	NaN	NaN
20140904-PurClathDigest-1ug-01	526	525	6.0372	0.93012	469.03	189770	2038800	0	-5.3024	1	12.16	66.75	66.75	68.01	63.69	1.901	0	1.901	0	0	0	0		NaN	NaN	NaN	NaN
20140904-PurClathDigest-1ug-01	527	526	6.0527	0.95979	489.32	195370	2029300	0	-5.3024	1	12.21	66.69	66.69	67.97	63.62	1.909	0	1.909	0	0	0	0		NaN	NaN	NaN	NaN
20140904-PurClathDigest-1ug-01	528	527	6.0687	0.90011	442.08	205050	2172800	0	-5.3024	1	12.26	66.63	66.63	67.92	63.56	1.917	0	1.917	0	0	0	0		NaN	NaN	NaN	NaN
20140904-PurClathDigest-1ug-01	529	528	6.0837	0.89001	428.99	213850	2243100	0	-5.3024	1	12.31	66.57	66.57	67.89	63.5	1.925	0	1.925	0	0	0	0		NaN	NaN	NaN	NaN
20140904-PurClathDigest-1ug-01	530	529	6.0986	0.7901	323.51	269850	2763700	0	-5.3024	1	12.35	66.52	66.52	67.85	63.43	1.933	0	1.933	0	0	0	0		NaN	NaN	NaN	NaN
20140904-PurClathDigest-1ug-01	531	530	6.1117	0.88989	428.82	195830	2133300	0	-5.3024	1	12.4	66.47	66.47	67.81	63.38	1.94	0	1.94	0	0	0	0		NaN	NaN	NaN	NaN
20140904-PurClathDigest-1ug-01	532	531	6.1266	0.90989	454.73	190580	2079000	0	-5.3024	1	12.44	66.41	66.41	67.78	63.32	1.948	0	1.948	0	0	0	0		NaN	NaN	NaN	NaN
20140904-PurClathDigest-1ug-01	533	532	6.1417	0.78012	315.68	295620	2968000	0	-5.3024	1	12.49	66.35	66.35	67.74	63.26	1.956	0	1.956	0	0	0	0		NaN	NaN	NaN	NaN
20140904-PurClathDigest-1ug-01	534	533	6.1547	0.8499	393.05	227850	2387300	0	-5.3024	1	12.54	66.37	66.37	67.58	63.09	1.961	0	1.961	0	0	0.0002502	0	0	NaN	NaN	NaN	NaN
20140904-PurClathDigest-1ug-01	535	534	6.1689	0.8501	394.88	233000	2404600	0	-5.3024	1	12.59	66.49	66.49	67.18	62.68	1.963	0	1.963	0	0	0.0009996	0	0	NaN	NaN	NaN	NaN
20140904-PurClathDigest-1ug-01	536	535	6.1831	0.89991	435.86	209230	2213700	0	-5.3024	1	12.64	66.62	66.62	66.77	62.28	1.966	0	1.966	0	0	0.001749	0	0	NaN	NaN	NaN	NaN
20140904-PurClathDigest-1ug-01	537	536	6.1981	0.83001	373.8	237680	2486700	0	-5.3024	1	12.7	66.76	66.76	66.34	61.85	1.968	0	1.968	0	0	0.002543	0	0	NaN	NaN	NaN	NaN
20140904-PurClathDigest-1ug-01	538	537	6.2119	0.93009	467.11	202900	2138400	0	-5.3024	1	12.75	66.88	66.88	65.95	61.45	1.97	0	1.97	0	0	0.003275	0	0	NaN	NaN	NaN	NaN
20140904-PurClathDigest-1ug-01	539	538	6.2274	0.87001	399.32	208480	2267200	0	-5.3024	1	12.81	67.02	67.02	65.51	61.01	1.973	0	1.973	0	0	0.004095	0	0	NaN	NaN	NaN	NaN
20140904-PurClathDigest-1ug-01	540	539	6.2419	0.82998	374.32	254630	2589700	0	-5.3024	1	12.86	67.15	67.15	65.1	60.59	1.975	0	1.975	0	0	0.004862	0	0	NaN	NaN	NaN	NaN
20140904-PurClathDigest-1ug-01	541	540	6.2557	0.95	485.38	189460	2037700	0	-5.3024	1	12.92	67.28	67.28	64.7	60.2	1.977	0	1.977	0	0	0.005594	0	0	NaN	NaN	NaN	NaN
20140904-PurClathDigest-1ug-01	542	541	6.2716	0.9508	488.32	185850	2032200	0	-5.3024	1	12.98	67.42	67.42	64.25	59.75	1.98	0	1.98	0	0	0.006432	0	0	NaN	NaN	NaN	NaN
20140904-PurClathDigest-1ug-01	543	542	6.2874	0.9191	464.65	201530	2177700	0	-5.3024	1	13.04	67.56	67.56	63.8	59.29	1.982	0	1.982	0	0	0.00727	0	0	NaN	NaN	NaN	NaN
20140904-PurClathDigest-1ug-01	544	543	6.3027	0.8301	370.04	230810	2609600	0	-5.3024	1	13.09	67.7	67.7	63.36	58.85	1.985	0	1.985	0	0	0.008081	0	0	NaN	NaN	NaN	NaN
20140904-PurClathDigest-1ug-01	545	544	6.3166	0.86989	408.19	223800	2462200	0	-5.3024	1	13.14	67.83	67.83	62.97	58.46	1.987	0	1.987	0	0	0.008813	0	0	NaN	NaN	NaN	NaN
20140904-PurClathDigest-1ug-01	546	545	6.3311	0.87009	413.9	233350	2430200	0	-5.3024	1	13.2	67.96	67.96	62.56	58.04	1.989	0	1.989	0	0	0.00958	0	0	NaN	NaN	NaN	NaN
20140904-PurClathDigest-1ug-01	547	546	6.3456	0.85001	391.97	235530	2430700	0	-5.3024	1	13.25	68.09	68.09	62.14	57.63	1.991	0	1.991	0	0	0.01035	0	0	NaN	NaN	NaN	NaN
20140904-PurClathDigest-1ug-01	548	547	6.3597	0.85999	402.05	227270	2385100	0	-5.3024	1	13.31	68.22	68.22	61.74	57.22	1.994	0	1.994	0	0	0.0111	0	0	NaN	NaN	NaN	NaN
20140904-PurClathDigest-1ug-01	549	548	6.3741	0.89001	428.83	209610	2248400	0	-5.3024	1	13.36	68.35	68.35	61.33	56.81	1.996	0	1.996	0	0	0.01186	0	0	NaN	NaN	NaN	NaN
20140904-PurClathDigest-1ug-01	550	549	6.3889	0.8299	370.88	229840	2499500	0	-5.3024	1	13.42	68.48	68.48	60.91	56.39	1.998	0	1.998	0	0	0.01264	0	0	NaN	NaN	NaN	NaN
20140904-PurClathDigest-1ug-01	551	550	6.4027	0.8101	339.97	251490	2684300	0	-5.3024	1	13.47	68.61	68.61	60.51	55.99	2	0	2	0	0	0.01337	0	0	NaN	NaN	NaN	NaN
20140904-PurClathDigest-1ug-01	552	551	6.4162	0.86989	411.71	230020	2381900	0	-5.3024	1	13.52	68.73	68.73	60.13	55.61	2.003	0	2.003	0	0	0.01409	0	0	NaN	NaN	NaN	NaN
20140904-PurClathDigest-1ug-01	553	552	6.4307	0.8101	349.87	252200	2740800	0	-5.3024	1	13.57	68.86	68.86	59.72	55.19	2.005	0	2.005	0	0	0.01485	0	0	NaN	NaN	NaN	NaN
20140904-PurClathDigest-1ug-01	554	553	6.4442	0.94002	478.83	199000	2059700	0	-5.3024	1	13.62	68.98	68.98	59.33	54.81	2.007	0	2.007	0	0	0.01557	0	0	NaN	NaN	NaN	NaN
20140904-PurClathDigest-1ug-01	555	554	6.4599	0.90989	447.91	208600	2187300	0	-5.3024	1	13.67	68.64	68.64	59.07	54.53	2.01	0	2.01	0	0	0.01587	0	0	NaN	NaN	NaN	NaN
20140904-PurClathDigest-1ug-01	556	555	6.4751	0.89999	419.23	213730	2288500	0	-5.3024	1	13.7	68.03	68.03	58.92	54.37	2.014	0	2.014	0	0	0.01587	0	0	NaN	NaN	NaN	NaN
20140904-PurClathDigest-1ug-01	557	556	6.4901	0.8202	361.34	254820	2603300	0	-5.3024	1	13.74	67.43	67.43	58.77	54.2	2.017	0	2.017	0	0	0.01587	0	0	NaN	NaN	NaN	NaN
20140904-PurClathDigest-1ug-01	558	557	6.5037	0.85991	401.33	231270	2353500	0	-5.3024	1	13.77	66.88	66.88	58.63	54.05	2.021	0	2.021	0	0	0.01587	0	0	NaN	NaN	NaN	NaN
20140904-PurClathDigest-1ug-01	559	558	6.5181	0.87991	416.5	217890	2274900	0	-5.3024	1	13.8	66.3	66.3	58.49	53.9	2.024	0	2.024	0	0	0.01587	0	0	NaN	NaN	NaN	NaN
20140904-PurClathDigest-1ug-01	560	559	6.5327	0.93999	479.46	181050	1989200	0	-5.3024	1	13.83	65.72	65.72	58.34	53.74	2.028	0	2.028	0	0	0.01587	0	0	NaN	NaN	NaN	NaN
20140904-PurClathDigest-1ug-01	561	560	6.5484	0.8501	389.26	196270	2224600	0	-5.3024	1	13.87	65.09	65.09	58.18	53.57	2.031	0	2.031	0	0	0.01587	0	0	NaN	NaN	NaN	NaN
20140904-PurClathDigest-1ug-01	562	561	6.5626	0.9302	472.03	202730	2101200	0	-5.3024	1	13.9	64.52	64.52	58.04	53.41	2.035	0	2.035	0	0	0.01587	0	0	NaN	NaN	NaN	NaN
20140904-PurClathDigest-1ug-01	563	562	6.5781	0.91982	454.01	208500	2158900	0	-5.3024	1	13.94	63.9	63.9	57.89	53.24	2.038	0	2.038	0	0	0.01587	0	0	NaN	NaN	NaN	NaN
20140904-PurClathDigest-1ug-01	564	563	6.5934	0.72988	269.9	288440	3001800	0	-5.3024	1	13.97	63.28	63.28	57.73	53.07	2.042	0	2.042	0	0	0.01587	0	0	NaN	NaN	NaN	NaN
20140904-PurClathDigest-1ug-01	565	564	6.6056	0.85012	387.39	211260	2264000	0	-5.3024	1	14	62.8	62.8	57.61	52.94	2.045	0	2.045	0	0	0.01587	0	0	NaN	NaN	NaN	NaN
20140904-PurClathDigest-1ug-01	566	565	6.6197	0.96067	500	178130	1925800	0	-5.3024	1	14.03	62.23	62.23	57.47	52.78	2.048	0	2.048	0	0	0.01587	0	0	NaN	NaN	NaN	NaN
20140904-PurClathDigest-1ug-01	567	566	6.6357	0.9193	458.51	178000	2028200	0	-5.3024	1	14.07	61.59	61.59	57.31	52.61	2.052	0	2.052	0	0	0.01587	0	0	NaN	NaN	NaN	NaN
20140904-PurClathDigest-1ug-01	568	567	6.6511	0.8499	394.51	221550	2314200	0	-5.3024	1	14.1	60.97	60.97	57.16	52.44	2.056	0	2.056	0	0	0.01587	0	0	NaN	NaN	NaN	NaN
20140904-PurClathDigest-1ug-01	569	568	6.6652	0.82011	362.26	218610	2404600	0	-5.3024	1	14.13	60.4	60.4	57.01	52.29	2.059	0	2.059	0	0	0.01587	0	0	NaN	NaN	NaN	NaN
20140904-PurClathDigest-1ug-01	570	569	6.6789	0.94989	490.31	177290	1930900	0	-5.3024	1	14.17	59.86	59.86	56.88	52.14	2.062	0	2.062	0	0	0.01587	0	0	NaN	NaN	NaN	NaN
20140904-PurClathDigest-1ug-01	571	570	6.6947	0.9401	484.01	185480	1986300	0	-5.3024	1	14.2	59.22	59.22	56.72	51.96	2.066	0	2.066	0	0	0.01587	0	0	NaN	NaN	NaN	NaN
20140904-PurClathDigest-1ug-01	572	571	6.7104	0.95	490.3	185190	1983300	0	-5.3024	1	14.24	58.59	58.59	56.56	51.79	2.07	0	2.07	0	0	0.01587	0	0	NaN	NaN	NaN	NaN
20140904-PurClathDigest-1ug-01	573	572	6.7262	0.87999	420.91	218770	2232200	0	-5.3024	1	14.27	57.96	57.96	56.4	51.62	2.074	0	2.074	0	0	0.01587	0	0	NaN	NaN	NaN	NaN
20140904-PurClathDigest-1ug-01	574	573	6.7409	0.87991	421.27	213060	2225000	0	-5.3024	1	14.31	57.37	57.37	56.26	51.46	2.077	0	2.077	0	0	0.01587	0	0	NaN	NaN	NaN	NaN
20140904-PurClathDigest-1ug-01	575	574	6.7556	0.91009	444.77	213180	2195000	0	-5.3024	1	14.33	56.93	56.93	56.14	51.33	2.078	0	2.078	0	0	0.01587	0	0	NaN	NaN	NaN	NaN
20140904-PurClathDigest-1ug-01	576	575	6.7707	0.86002	400.14	202660	2222000	0	-5.3024	1	14.34	56.74	56.74	56.05	51.25	2.076	0	2.076	0	0	0.01587	0	0	NaN	NaN	NaN	NaN
20140904-PurClathDigest-1ug-01	577	576	6.7851	0.82	358.83	253890	2588000	0	-5.3024	1	14.36	56.56	56.56	55.97	51.18	2.074	0	2.074	0	0	0.01587	0	0	NaN	NaN	NaN	NaN
20140904-PurClathDigest-1ug-01	578	577	6.7987	0.90989	449.31	196970	2114200	0	-5.3024	1	14.37	56.39	56.39	55.9	51.11	2.072	0	2.072	0	0	0.01587	0	0	NaN	NaN	NaN	NaN
20140904-PurClathDigest-1ug-01	579	578	6.8139	0.8301	367.15	230520	2437800	0	-5.3024	1	14.38	56.19	56.19	55.82	51.03	2.069	0	2.069	0	0	0.01587	0	0	NaN	NaN	NaN	NaN
20140904-PurClathDigest-1ug-01	580	579	6.8277	0.76	304.9	305950	2856600	0	-5.3024	1	14.39	56.02	56.02	55.74	50.96	2.067	0	2.067	0	0	0.01587	0	0	NaN	NaN	NaN	NaN
20140904-PurClathDigest-1ug-01	581	580	6.8404	0.8499	388.25	242080	2459100	0	-5.3024	1	14.4	55.86	55.86	55.67	50.9	2.065	0	2.065	0	0	0.01587	0	0	NaN	NaN	NaN	NaN
20140904-PurClathDigest-1ug-01	582	581	6.8546	0.91012	454.65	187660	2048400	0	-5.3024	1	14.41	55.68	55.68	55.59	50.83	2.063	0	2.063	0	0	0.01587	0	0	NaN	NaN	NaN	NaN
20140904-PurClathDigest-1ug-01	583	582	6.8697	0.97959	500	183740	1976700	0	-5.3024	1	14.42	55.49	55.49	55.51	50.75	2.06	0	2.06	0	0	0.01587	0	0	NaN	NaN	NaN	NaN
20140904-PurClathDigest-1ug-01	584	583	6.8861	0.9603	499.38	176070	1907100	0	-5.3024	1	14.44	55.28	55.28	55.42	50.67	2.058	0	2.058	0	0	0.01587	0	0	NaN	NaN	NaN	NaN
20140904-PurClathDigest-1ug-01	585	584	6.9021	0.93999	483.27	188550	2001800	0	-5.3024	1	14.45	55.07	55.07	55.33	50.58	2.055	0	2.055	0	0	0.01587	0	0	NaN	NaN	NaN	NaN
20140904-PurClathDigest-1ug-01	586	585	6.9177	0.83001	373.3	210140	2339400	0	-5.3024	1	14.46	54.88	54.88	55.25	50.51	2.053	0	2.053	0	0	0.01587	0	0	NaN	NaN	NaN	NaN
20140904-PurClathDigest-1ug-01	587	586	6.9316	0.87001	404.55	228050	2314600	0	-5.3024	1	14.47	54.7	54.7	55.17	50.43	2.051	0	2.051	0	0	0.01587	0	0	NaN	NaN	NaN	NaN
20140904-PurClathDigest-1ug-01	588	587	6.9461	0.90998	447.83	193920	2139700	0	-5.3024	1	14.49	54.52	54.52	55.09	50.36	2.048	0	2.048	0	0	0.01587	0	0	NaN	NaN	NaN	NaN
20140904-PurClathDigest-1ug-01	589	588	6.9612	0.88002	420.08	193900	2164500	0	-5.3024	1	14.5	54.32	54.32	55.01	50.28	2.046	0	2.046	0	0	0.01587	0	0	NaN	NaN	NaN	NaN
20140904-PurClathDigest-1ug-01	590	589	6.9759	0.91999	460.5	201010	2122500	0	-5.3024	1	14.51	54.14	54.14	54.93	50.21	2.044	0	2.044	0	0	0.01587	0	0	NaN	NaN	NaN	NaN
20140904-PurClathDigest-1ug-01	591	590	6.9912	0.92031	458.81	174580	1967200	0	-5.3024	1	14.52	53.94	53.94	54.85	50.13	2.041	0	2.041	0	0	0.01587	0	0	NaN	NaN	NaN	NaN
20140904-PurClathDigest-1ug-01	592	591	7.0066	0.91979	443.95	215920	2221000	0	-5.3024	1	14.53	53.75	53.75	54.76	50.05	2.039	0	2.039	0	0	0.01587	0	0	NaN	NaN	NaN	NaN
20140904-PurClathDigest-1ug-01	593	592	7.0219	0.79991	335.98	250880	2635600	0	-5.3024	1	14.55	53.55	53.55	54.68	49.98	2.036	0	2.036	0	0	0.01587	0	0	NaN	NaN	NaN	NaN
20140904-PurClathDigest-1ug-01	594	593	7.0352	0.71998	265.19	333530	3243600	0	-5.3024	1	14.56	53.39	53.39	54.6	49.91	2.034	0	2.034	0	0	0.01587	0	0	NaN	NaN	NaN	NaN
20140904-PurClathDigest-1ug-01	595	594	7.0472	0.79001	336.57	266380	2740400	0	-5.3024	1	14.57	53.23	53.23	54.54	49.85	2.032	0	2.032	0	0	0.01587	0	0	NaN	NaN	NaN	NaN
20140904-PurClathDigest-1ug-01	596	595	7.0604	0.8301	372.86	250220	2582300	0	-5.3024	1	14.56	53.25	53.25	54.5	49.8	2.037	0	2.037	0	0	0.01587	0	0	NaN	NaN	NaN	NaN
20140904-PurClathDigest-1ug-01	597	596	7.0742	0.8	330.97	275860	2810500	0	-5.3024	1	14.55	53.32	53.32	54.46	49.75	2.043	0	2.043	0	0	0.01587	0	0	NaN	NaN	NaN	NaN
20140904-PurClathDigest-1ug-01	598	597	7.0876	0.8	346.32	251750	2599500	0	-5.3024	1	14.54	53.39	53.39	54.42	49.71	2.05	0	2.05	0	0	0.01587	0	0	NaN	NaN	NaN	NaN
20140904-PurClathDigest-1ug-01	599	598	7.1009	0.91001	442.14	180200	2030300	0	-5.3024	1	14.54	53.45	53.45	54.39	49.67	2.056	0	2.056	0	0	0.01587	0	0	NaN	NaN	NaN	NaN
20140904-PurClathDigest-1ug-01	600	599	7.1161	0.91999	458.05	210010	2157700	0	-5.3024	1	14.53	53.53	53.53	54.35	49.62	2.063	0	2.063	0	0	0.01587	0	0	NaN	NaN	NaN	NaN
20140904-PurClathDigest-1ug-01	601	600	7.1314	0.9601	500	175900	1933900	0	-5.3024	1	14.52	53.6	53.6	54.31	49.57	2.071	0	2.071	0	0	0.01587	0	0	NaN	NaN	NaN	NaN
20140904-PurClathDigest-1ug-01	602	601	7.1474	0.85991	399.12	204450	2190500	0	-5.3024	1	14.51	53.68	53.68	54.26	49.51	2.078	0	2.078	0	0	0.01587	0	0	NaN	NaN	NaN	NaN
20140904-PurClathDigest-1ug-01	603	602	7.1617	0.86989	415.71	240960	2313800	0	-5.3024	1	14.5	53.76	53.76	54.23	49.47	2.085	0	2.085	0	0	0.01587	0	0	NaN	NaN	NaN	NaN
20140904-PurClathDigest-1ug-01	604	603	7.1762	0.87999	421.42	216350	2246600	0	-5.3024	1	14.49	53.83	53.83	54.19	49.42	2.092	0	2.092	0	0	0.01587	0	0	NaN	NaN	NaN	NaN
20140904-PurClathDigest-1ug-01	605	604	7.1909	0.9601	492.92	207830	2042700	0	-5.3024	1	14.48	53.9	53.9	54.15	49.37	2.099	0	2.099	0	0	0.01587	0	0	NaN	NaN	NaN	NaN
20140904-PurClathDigest-1ug-01	606	605	7.2069	0.85999	386.7	206680	2203000	0	-5.3024	1	14.47	53.98	53.98	54.1	49.32	2.106	0	2.106	0	0	0.01587	0	0	NaN	NaN	NaN	NaN
20140904-PurClathDigest-1ug-01	607	606	7.2212	0.9607	499.56	169540	1883400	0	-5.3024	1	14.46	54.05	54.05	54.07	49.27	2.113	0	2.113	0	0	0.01587	0	0	NaN	NaN	NaN	NaN
20140904-PurClathDigest-1ug-01	608	607	7.2372	0.93922	474.51	182450	1979000	0	-5.3024	1	14.45	54.13	54.13	54.02	49.22	2.121	0	2.121	0	0	0.01587	0	0	NaN	NaN	NaN	NaN
20140904-PurClathDigest-1ug-01	609	608	7.2529	0.95	495.16	169770	1882700	0	-5.3024	1	14.44	54.21	54.21	53.98	49.17	2.128	0	2.128	0	0	0.01587	0	0	NaN	NaN	NaN	NaN
20140904-PurClathDigest-1ug-01	610	609	7.2687	0.9601	494.98	165510	1837300	0	-5.3024	1	14.43	54.29	54.29	53.94	49.12	2.136	0	2.136	0	0	0.01587	0	0	NaN	NaN	NaN	NaN
20140904-PurClathDigest-1ug-01	611	610	7.2847	0.85999	401.38	203060	2139800	0	-5.3024	1	14.42	54.37	54.37	53.9	49.06	2.144	0	2.144	0	0	0.01587	0	0	NaN	NaN	NaN	NaN
20140904-PurClathDigest-1ug-01	612	611	7.2991	0.95	494.32	163650	1822800	0	-5.3024	1	14.41	54.44	54.44	53.86	49.02	2.15	0	2.15	0	0	0.01587	0	0	NaN	NaN	NaN	NaN
20140904-PurClathDigest-1ug-01	613	612	7.3149	0.81988	363.05	253670	2465400	0	-5.3024	1	14.4	54.52	54.52	53.82	48.96	2.158	0	2.158	0	0	0.01587	0	0	NaN	NaN	NaN	NaN
20140904-PurClathDigest-1ug-01	614	613	7.3286	0.7901	325.69	265250	2596300	0	-5.3024	1	14.39	54.59	54.59	53.78	48.92	2.164	0	2.164	0	0	0.01587	0	0	NaN	NaN	NaN	NaN
20140904-PurClathDigest-1ug-01	615	614	7.3417	0.90002	420.32	184180	1994100	0	-5.3024	1	14.38	54.66	54.66	53.74	48.88	2.171	0	2.171	0	0	0.01587	0	0	NaN	NaN	NaN	NaN
20140904-PurClathDigest-1ug-01	616	615	7.3567	0.95999	500	156500	1707900	0	-5.3024	1	14.35	54.48	54.48	53.7	48.83	2.175	0	2.175	0	0	0.01587	0	0	NaN	NaN	NaN	NaN
20140904-PurClathDigest-1ug-01	617	616	7.3727	0.81991	360.99	210180	2110800	0	-5.3024	1	14.29	53.97	53.97	53.66	48.79	2.177	0	2.177	0	0	0.01587	0	0	NaN	NaN	NaN	NaN
20140904-PurClathDigest-1ug-01	618	617	7.3864	0.85999	404.15	183700	2024300	0	-5.3024	1	14.24	53.53	53.53	53.63	48.75	2.178	0	2.178	0	0	0.01587	0	0	NaN	NaN	NaN	NaN
20140904-PurClathDigest-1ug-01	619	618	7.4007	1.9805	500	208280	2325200	2	-5.3024	1	14.19	53.06	53.06	53.59	48.71	2.18	0	2.18	0	0	0.01587	0	0	NaN	NaN	NaN	NaN
20140904-PurClathDigest-1ug-01	622	619	7.4337	0.88952	427.6	186480	2019700	0	-5.3024	1	14.07	52	52	53.5	48.62	2.183	0	2.183	0	0	0.01587	0	0	NaN	NaN	NaN	NaN
20140904-PurClathDigest-1ug-01	623	620	7.4486	0.96997	500	158440	1755200	0	-5.3024	1	14.02	51.52	51.52	53.46	48.58	2.185	0	2.185	0	0	0.01587	0	0	NaN	NaN	NaN	NaN
20140904-PurClathDigest-1ug-01	624	621	7.4647	0.87012	407.31	188800	2034400	0	-5.3024	1	13.96	51	51	53.42	48.54	2.187	0	2.187	0	0	0.01587	0	0	NaN	NaN	NaN	NaN
20140904-PurClathDigest-1ug-01	625	622	7.4792	0.82998	372.33	229730	2285200	0	-5.3024	1	13.9	50.53	50.53	53.38	48.5	2.188	0	2.188	0	0	0.01587	0	0	NaN	NaN	NaN	NaN
20140904-PurClathDigest-1ug-01	626	623	7.4931	0.83001	371.51	221530	2269800	0	-5.3024	1	13.85	50.09	50.09	53.35	48.46	2.19	0	2.19	0	0	0.01587	0	0	NaN	NaN	NaN	NaN
20140904-PurClathDigest-1ug-01	627	624	7.5069	0.8299	373.36	249930	2554200	0	-5.3024	1	13.8	49.64	49.64	53.31	48.43	2.191	0	2.191	0	0	0.01587	0	0	NaN	NaN	NaN	NaN
20140904-PurClathDigest-1ug-01	628	625	7.5207	0.82011	365.22	241040	2439200	0	-5.3024	1	13.75	49.2	49.2	53.28	48.39	2.193	0	2.193	0	0	0.01587	0	0	NaN	NaN	NaN	NaN
20140904-PurClathDigest-1ug-01	629	626	7.5344	0.88989	430.45	183200	2022000	0	-5.3024	1	13.7	48.76	48.76	53.24	48.35	2.194	0	2.194	0	0	0.01587	0	0	NaN	NaN	NaN	NaN
20140904-PurClathDigest-1ug-01	630	627	7.5492	0.71019	252.68	333520	3018000	0	-5.3024	1	13.65	48.28	48.28	53.2	48.31	2.196	0	2.196	0	0	0.01587	0	0	NaN	NaN	NaN	NaN
20140904-PurClathDigest-1ug-01	631	628	7.5611	0.9199	459.07	203580	1946800	0	-5.3024	1	13.61	47.9	47.9	53.17	48.28	2.197	0	2.197	0	0	0.01587	0	0	NaN	NaN	NaN	NaN
20140904-PurClathDigest-1ug-01	632	629	7.5764	0.89991	432.9	222780	2069400	0	-5.3024	1	13.55	47.4	47.4	53.13	48.24	2.199	0	2.199	0	0	0.01587	0	0	NaN	NaN	NaN	NaN
20140904-PurClathDigest-1ug-01	633	630	7.5914	0.88998	435.02	186510	1964800	0	-5.3024	1	13.49	46.92	46.92	53.09	48.2	2.2	0	2.2	0	0	0.01587	0	0	NaN	NaN	NaN	NaN
20140904-PurClathDigest-1ug-01	634	631	7.6062	0.9801	500	177610	1834500	0	-5.3024	1	13.44	46.44	46.44	53.05	48.16	2.202	0	2.202	0	0	0.01587	0	0	NaN	NaN	NaN	NaN
20140904-PurClathDigest-1ug-01	635	632	7.6226	0.96002	489.23	157730	1749500	0	-5.3024	1	13.38	45.92	45.92	53.01	48.11	2.203	0	2.203	0	0	0.01587	0	0	NaN	NaN	NaN	NaN
20140904-PurClathDigest-1ug-01	636	633	7.6386	0.9599	500	164200	1745000	0	-5.3024	1	13.32	45.4	45.4	52.97	48.07	2.205	0	2.205	0	0	0.01587	0	0	NaN	NaN	NaN	NaN
20140904-PurClathDigest-1ug-01	637	634	7.6546	0.9601	500	149450	1712300	0	-5.3024	1	13.27	44.92	44.92	53.06	48.16	2.207	0	2.207	0	0	0.01587	0	0	NaN	NaN	NaN	NaN
20140904-PurClathDigest-1ug-01	638	635	7.6706	0.8499	389.05	206890	2140200	0	-5.3024	1	13.21	44.53	44.53	53.49	48.59	2.209	0	2.209	0	0	0.01587	0	0	NaN	NaN	NaN	NaN
20140904-PurClathDigest-1ug-01	639	636	7.6847	0.9201	465.91	174640	1851300	0	-5.3024	1	13.17	44.18	44.18	53.88	48.97	2.21	0	2.21	0	0	0.01587	0	0	NaN	NaN	NaN	NaN
20140904-PurClathDigest-1ug-01	640	637	7.7001	0.95999	500	175420	1836600	0	-5.3024	1	13.12	43.8	43.8	54.3	49.38	2.212	0	2.212	0	0	0.01587	0	0	NaN	NaN	NaN	NaN
20140904-PurClathDigest-1ug-01	641	638	7.7161	0.9199	462.33	192420	1911000	0	-5.3024	1	13.06	43.41	43.41	54.73	49.81	2.213	0	2.213	0	0	0.01587	0	0	NaN	NaN	NaN	NaN
20140904-PurClathDigest-1ug-01	642	639	7.7314	0.84	383.03	218950	2188300	0	-5.3024	1	13.01	43.03	43.03	55.15	50.22	2.215	0	2.215	0	0	0.01587	0	0	NaN	NaN	NaN	NaN
20140904-PurClathDigest-1ug-01	643	640	7.7454	0.85999	403.18	212410	2040300	0	-5.3024	1	12.97	42.69	42.69	55.53	50.59	2.216	0	2.216	0	0	0.01587	0	0	NaN	NaN	NaN	NaN
20140904-PurClathDigest-1ug-01	644	641	7.7597	0.93012	464.72	190230	1894200	0	-5.3024	1	12.92	42.34	42.34	55.91	50.98	2.218	0	2.218	0	0	0.01587	0	0	NaN	NaN	NaN	NaN
20140904-PurClathDigest-1ug-01	645	642	7.7752	0.89988	430.95	179950	1882700	0	-5.3024	1	12.87	41.96	41.96	56.34	51.39	2.22	0	2.22	0	0	0.01587	0	0	NaN	NaN	NaN	NaN
20140904-PurClathDigest-1ug-01	646	643	7.7902	0.97012	500	150600	1632900	0	-5.3024	1	12.82	41.59	41.59	56.74	51.79	2.221	0	2.221	0	0	0.01587	0	0	NaN	NaN	NaN	NaN
20140904-PurClathDigest-1ug-01	647	644	7.8064	0.9599	500	171740	1794200	0	-5.3024	1	12.77	41.19	41.19	57.18	52.23	2.223	0	2.223	0	0	0.01587	0	0	NaN	NaN	NaN	NaN
20140904-PurClathDigest-1ug-01	648	645	7.8224	0.89009	427.56	227490	2128500	0	-5.3024	1	12.71	40.8	40.8	57.62	52.66	2.225	0	2.225	0	0	0.01587	0	0	NaN	NaN	NaN	NaN
20140904-PurClathDigest-1ug-01	649	646	7.8372	0.96002	500	155250	1691300	0	-5.3024	1	12.66	40.44	40.44	58.02	53.05	2.226	0	2.226	0	0	0.01587	0	0	NaN	NaN	NaN	NaN
20140904-PurClathDigest-1ug-01	650	647	7.8532	0.93999	475.29	178840	1860700	0	-5.3024	1	12.61	40.04	40.04	58.45	53.48	2.228	0	2.228	0	0	0.01587	0	0	NaN	NaN	NaN	NaN
20140904-PurClathDigest-1ug-01	651	648	7.8689	0.8299	372.88	218090	2179900	0	-5.3024	1	12.56	39.66	39.66	58.88	53.9	2.23	0	2.23	0	0	0.01587	0	0	NaN	NaN	NaN	NaN
20140904-PurClathDigest-1ug-01	652	649	7.8827	0.87001	410.47	189580	1945900	0	-5.3024	1	12.51	39.32	39.32	59.25	54.27	2.231	0	2.231	0	0	0.01587	0	0	NaN	NaN	NaN	NaN
20140904-PurClathDigest-1ug-01	653	650	7.8972	0.88998	427.33	224060	2150400	0	-5.3024	1	12.47	38.96	38.96	59.65	54.66	2.233	0	2.233	0	0	0.01587	0	0	NaN	NaN	NaN	NaN
20140904-PurClathDigest-1ug-01	654	651	7.9121	0.93012	467.42	171700	1792300	0	-5.3024	1	12.42	38.6	38.6	60.05	55.06	2.234	0	2.234	0	0	0.01587	0	0	NaN	NaN	NaN	NaN
20140904-PurClathDigest-1ug-01	655	652	7.9276	0.95999	500	149040	1653700	0	-5.3024	1	12.37	38.22	38.22	60.47	55.47	2.236	0	2.236	0	0	0.01587	0	0	NaN	NaN	NaN	NaN
20140904-PurClathDigest-1ug-01	656	653	7.9436	0.9599	500	190090	1806000	0	-5.3024	1	12.31	37.83	37.83	60.9	55.9	2.237	0	2.237	0	0	0.01587	0	0	NaN	NaN	NaN	NaN
20140904-PurClathDigest-1ug-01	657	654	7.9596	0.9401	478.07	187370	1842500	0	-5.3024	1	12.29	37.55	37.55	61.35	56.35	2.235	0	2.235	0	0	0.01587	0	0	NaN	NaN	NaN	NaN
20140904-PurClathDigest-1ug-01	658	655	7.9752	0.96019	500	147690	1627500	0	-5.3024	1	12.28	37.36	37.36	61.79	56.81	2.229	0	2.229	0	0	0.01587	0	0	NaN	NaN	NaN	NaN
20140904-PurClathDigest-1ug-01	659	656	7.9912	0.95979	500	167230	1718000	0	-5.3024	1	12.26	37.16	37.16	62.24	57.28	2.223	0	2.223	0	0	0.01587	0	0	NaN	NaN	NaN	NaN
20140904-PurClathDigest-1ug-01	660	657	8.0072	0.92995	458.66	194110	1892900	0	-5.3024	1	12.25	36.96	36.96	62.7	57.75	2.217	0	2.217	0	0	0.01587	0	0	NaN	NaN	NaN	NaN
20140904-PurClathDigest-1ug-01	661	658	8.0227	0.93006	472.26	176610	1849900	0	-5.3024	1	12.24	36.77	36.77	63.13	58.21	2.211	0	2.211	0	0	0.01587	0	0	NaN	NaN	NaN	NaN
20140904-PurClathDigest-1ug-01	662	659	8.0382	0.96004	500	200230	1932600	0	-5.3024	1	12.23	36.57	36.57	63.57	58.66	2.205	0	2.205	0	0	0.01587	0	0	NaN	NaN	NaN	NaN
20140904-PurClathDigest-1ug-01	663	660	8.0542	0.96016	500	157850	1688300	0	-5.3024	1	12.22	36.37	36.37	64.02	59.13	2.199	0	2.199	0	0	0.01587	0	0	NaN	NaN	NaN	NaN
20140904-PurClathDigest-1ug-01	664	661	8.0702	0.9197	457.62	188100	1889200	0	-5.3024	1	12.21	36.17	36.17	64.48	59.6	2.194	0	2.194	0	0	0.01587	0	0	NaN	NaN	NaN	NaN
20140904-PurClathDigest-1ug-01	665	662	8.0856	0.93	468.18	165470	1826800	0	-5.3024	1	12.2	35.98	35.98	64.91	60.05	2.188	0	2.188	0	0	0.01587	0	0	NaN	NaN	NaN	NaN
20140904-PurClathDigest-1ug-01	666	663	8.1011	0.96022	500	163490	1741800	0	-5.3024	1	12.19	35.79	35.79	65.35	60.5	2.182	0	2.182	0	0	0.01587	0	0	NaN	NaN	NaN	NaN
20140904-PurClathDigest-1ug-01	667	664	8.1171	0.95982	500	174840	1816300	0	-5.3024	1	12.18	35.59	35.59	65.8	60.97	2.176	0	2.176	0	0	0.01587	0	0	NaN	NaN	NaN	NaN
20140904-PurClathDigest-1ug-01	668	665	8.1331	0.97029	500	190840	1823900	0	-5.3024	1	12.17	35.39	35.39	66.25	61.44	2.17	0	2.17	0	0	0.01587	0	0	NaN	NaN	NaN	NaN
20140904-PurClathDigest-1ug-01	669	666	8.1492	0.8198	365.92	270810	2523000	0	-5.3024	1	12.16	35.19	35.19	66.71	61.92	2.164	0	2.164	0	0	0.01587	0	0	NaN	NaN	NaN	NaN
20140904-PurClathDigest-1ug-01	670	667	8.1629	0.95999	500	194770	1867800	0	-5.3024	1	12.15	35.02	35.02	67.09	62.32	2.159	0	2.159	0	0	0.01587	0	0	NaN	NaN	NaN	NaN
20140904-PurClathDigest-1ug-01	671	668	8.1789	0.93	466.68	172380	1867200	0	-5.3024	1	12.14	34.82	34.82	67.55	62.79	2.153	0	2.153	0	0	0.01587	0	0	NaN	NaN	NaN	NaN
20140904-PurClathDigest-1ug-01	672	669	8.1944	0.90002	438.1	188410	1948200	0	-5.3024	1	12.13	34.63	34.63	67.98	63.24	2.148	0	2.148	0	0	0.01587	0	0	NaN	NaN	NaN	NaN
20140904-PurClathDigest-1ug-01	673	670	8.2094	0.89996	444.64	184480	1921700	0	-5.3024	1	12.12	34.44	34.44	68.41	63.68	2.142	0	2.142	0	0	0.01587	0	0	NaN	NaN	NaN	NaN
20140904-PurClathDigest-1ug-01	674	671	8.2244	0.95993	500	147220	1644100	0	-5.3024	1	12.11	34.26	34.26	68.83	64.12	2.136	0	2.136	0	0	0.01587	0	0	NaN	NaN	NaN	NaN
20140904-PurClathDigest-1ug-01	675	672	8.2404	0.96016	500	152820	1682700	0	-5.3024	1	12.09	34.06	34.06	69.28	64.59	2.131	0	2.131	0	0	0.01587	0	0	NaN	NaN	NaN	NaN
20140904-PurClathDigest-1ug-01	676	673	8.2564	0.91982	456.28	189200	1958800	0	-5.3024	1	12.08	33.89	33.89	69.71	65.03	2.126	0	2.126	0	0	0.01553	0	0	NaN	NaN	NaN	NaN
20140904-PurClathDigest-1ug-01	677	674	8.2717	0.96033	500	177400	1787800	0	-5.3024	1	12.08	33.76	33.76	70.07	65.39	2.125	0	2.125	0	0	0.01472	0	0	NaN	NaN	NaN	NaN
20140904-PurClathDigest-1ug-01	678	675	8.2877	0.86975	412.9	202010	2003800	0	-5.3024	1	12.07	33.62	33.62	70.46	65.77	2.124	0	2.124	0	0	0.01388	0	0	NaN	NaN	NaN	NaN
20140904-PurClathDigest-1ug-01	679	676	8.3022	0.86992	399.9	204190	2082200	0	-5.3024	1	12.06	33.5	33.5	70.8	66.12	2.123	0	2.123	0	0	0.01311	0	0	NaN	NaN	NaN	NaN
20140904-PurClathDigest-1ug-01	680	677	8.3167	0.92028	462.69	195860	1903800	0	-5.3024	1	12.05	33.38	33.38	71.15	66.46	2.122	0	2.122	0	0	0.01234	0	0	NaN	NaN	NaN	NaN
20140904-PurClathDigest-1ug-01	681	678	8.3321	0.95982	500	166720	1698700	0	-5.3024	1	12.05	33.25	33.25	71.51	66.82	2.12	0	2.12	0	0	0.01153	0	0	NaN	NaN	NaN	NaN
20140904-PurClathDigest-1ug-01	682	679	8.3481	0.78999	335.04	254020	2387700	0	-5.3024	1	12.04	33.12	33.12	71.9	67.21	2.119	0	2.119	0	0	0.01068	0	0	NaN	NaN	NaN	NaN
20140904-PurClathDigest-1ug-01	683	680	8.3612	0.95993	500	184720	1788800	0	-5.3024	1	12.03	33	33	72.21	67.52	2.118	0	2.118	0	0	0.009988	0	0	NaN	NaN	NaN	NaN
20140904-PurClathDigest-1ug-01	684	681	8.3772	0.85001	388.44	238630	2178500	0	-5.3024	1	12.02	32.87	32.87	72.59	67.9	2.117	0	2.117	0	0	0.009141	0	0	NaN	NaN	NaN	NaN
20140904-PurClathDigest-1ug-01	685	682	8.3914	0.86008	400.25	225640	2103500	0	-5.3024	1	12.01	32.75	32.75	72.93	68.24	2.116	0	2.116	0	0	0.008392	0	0	NaN	NaN	NaN	NaN
20140904-PurClathDigest-1ug-01	686	683	8.4057	0.90002	441.91	198020	1944900	0	-5.3024	1	12.01	32.63	32.63	73.27	68.58	2.115	0	2.115	0	0	0.007633	0	0	NaN	NaN	NaN	NaN
20140904-PurClathDigest-1ug-01	687	684	8.4207	0.92989	475.24	175350	1842400	0	-5.3024	1	12	32.5	32.5	73.63	68.93	2.113	0	2.113	0	0	0.00684	0	0	NaN	NaN	NaN	NaN
20140904-PurClathDigest-1ug-01	688	685	8.4362	0.97012	500	169080	1752900	0	-5.3024	1	11.99	32.37	32.37	74	69.3	2.112	0	2.112	0	0	0.00602	0	0	NaN	NaN	NaN	NaN
20140904-PurClathDigest-1ug-01	689	686	8.4524	0.96016	500	181180	1779800	0	-5.3024	1	11.98	32.24	32.24	74.39	69.69	2.111	0	2.111	0	0	0.005164	0	0	NaN	NaN	NaN	NaN
20140904-PurClathDigest-1ug-01	690	687	8.4684	0.96983	500	202170	1868400	0	-5.3024	1	11.98	32.1	32.1	74.77	70.07	2.11	0	2.11	0	0	0.004318	0	0	NaN	NaN	NaN	NaN
20140904-PurClathDigest-1ug-01	691	688	8.4846	0.95987	500	165760	1702700	0	-5.3024	1	11.97	31.97	31.97	75.15	70.45	2.108	0	2.108	0	0	0.003462	0	0	NaN	NaN	NaN	NaN
20140904-PurClathDigest-1ug-01	692	689	8.5006	0.95999	500	184890	1771200	0	-5.3024	1	11.96	31.83	31.83	75.53	70.83	2.107	0	2.107	0	0	0.002616	0	0	NaN	NaN	NaN	NaN
20140904-PurClathDigest-1ug-01	693	690	8.5166	0.94002	478.46	175140	1793900	0	-5.3024	1	11.95	31.7	31.7	75.92	71.21	2.106	0	2.106	0	0	0.001769	0	0	NaN	NaN	NaN	NaN
20140904-PurClathDigest-1ug-01	694	691	8.5322	0.9601	500	156080	1683000	0	-5.3024	1	11.94	31.57	31.57	76.29	71.59	2.105	0	2.105	0	0	0.0009404	0	0	NaN	NaN	NaN	NaN
20140904-PurClathDigest-1ug-01	695	692	8.5482	0.95993	500	165910	1732000	0	-5.3024	1	11.93	31.43	31.43	76.67	71.97	2.103	0	2.103	0	0	9.374E-05	0	0	NaN	NaN	NaN	NaN
20140904-PurClathDigest-1ug-01	696	693	8.5642	0.9601	500	152060	1651000	0	-5.3024	1	11.93	31.47	31.47	77.17	72.47	2.102	0	2.102	0	0	0	0		NaN	NaN	NaN	NaN
20140904-PurClathDigest-1ug-01	697	694	8.5802	0.95987	500	138460	1562400	0	-5.3024	1	11.92	31.53	31.53	77.69	72.99	2.1	0	2.1	0	0	0	0		NaN	NaN	NaN	NaN
20140904-PurClathDigest-1ug-01	698	695	8.5962	0.9601	500	169530	1692400	0	-5.3024	1	11.91	31.59	31.59	78.21	73.52	2.098	0	2.098	0	0	0	0		NaN	NaN	NaN	NaN
20140904-PurClathDigest-1ug-01	699	696	8.6122	0.94002	481.32	171920	1780700	0	-5.3024	1	11.91	31.65	31.65	78.73	74.04	2.097	0	2.097	0	0	0	0		NaN	NaN	NaN	NaN
20140904-PurClathDigest-1ug-01	700	697	8.6279	0.95999	500	157830	1661500	0	-5.3024	1	11.9	31.71	31.71	79.23	74.55	2.095	0	2.095	0	0	0	0		NaN	NaN	NaN	NaN
20140904-PurClathDigest-1ug-01	701	698	8.6439	0.96989	500	167690	1723500	0	-5.3024	1	11.89	31.77	31.77	79.75	75.07	2.093	0	2.093	0	0	0	0		NaN	NaN	NaN	NaN
20140904-PurClathDigest-1ug-01	702	699	8.6601	0.95003	494.25	201500	1883400	0	-5.3024	1	11.88	31.83	31.83	80.27	75.6	2.092	0	2.092	0	0	0	0		NaN	NaN	NaN	NaN
20140904-PurClathDigest-1ug-01	703	700	8.6759	0.89006	428.92	191650	1948100	0	-5.3024	1	11.88	31.89	31.89	80.78	76.12	2.09	0	2.09	0	0	0	0		NaN	NaN	NaN	NaN
20140904-PurClathDigest-1ug-01	704	701	8.6907	0.95999	500	193750	1774700	0	-5.3024	1	11.87	31.95	31.95	81.26	76.6	2.088	0	2.088	0	0	0	0		NaN	NaN	NaN	NaN
20140904-PurClathDigest-1ug-01	705	702	8.7067	0.93	451.95	172780	1700300	0	-5.3024	1	11.86	32.01	32.01	81.78	77.12	2.087	0	2.087	0	0	0	0		NaN	NaN	NaN	NaN
20140904-PurClathDigest-1ug-01	706	703	8.7222	0.79994	345.65	233750	2526200	0	-5.3024	1	11.86	32.07	32.07	82.28	77.63	2.085	0	2.085	0	0	0	0		NaN	NaN	NaN	NaN
20140904-PurClathDigest-1ug-01	707	704	8.7356	0.94007	476.43	166040	2156200	0	-5.3024	1	11.85	32.12	32.12	82.71	78.07	2.084	0	2.084	0	0	0	0		NaN	NaN	NaN	NaN
20140904-PurClathDigest-1ug-01	708	705	8.7512	0.87999	422.88	235790	2534700	0	-5.3024	1	11.84	32.18	32.18	83.22	78.58	2.082	0	2.082	0	0	0	0		NaN	NaN	NaN	NaN
20140904-PurClathDigest-1ug-01	709	706	8.7659	0.79988	342.49	226300	2840400	0	-5.3024	1	11.84	32.24	32.24	83.69	79.06	2.08	0	2.08	0	0	0	0		NaN	NaN	NaN	NaN
20140904-PurClathDigest-1ug-01	710	707	8.7792	0.9601	500	163150	2214600	0	-5.3024	1	11.83	32.29	32.29	84.12	79.49	2.079	0	2.079	0	0	0	0		NaN	NaN	NaN	NaN
20140904-PurClathDigest-1ug-01	711	708	8.7952	0.95993	500	190520	2261300	0	-5.3024	1	11.83	32.35	32.35	84.64	80.01	2.077	0	2.077	0	0	0	0		NaN	NaN	NaN	NaN
20140904-PurClathDigest-1ug-01	712	709	8.8112	0.90998	440.24	242590	2511300	0	-5.3024	1	11.82	32.41	32.41	85.16	80.54	2.076	0	2.076	0	0	0	0		NaN	NaN	NaN	NaN
20140904-PurClathDigest-1ug-01	713	710	8.8264	0.92033	453.89	179570	2291300	0	-5.3024	1	11.81	32.46	32.46	85.65	81.03	2.074	0	2.074	0	0	0	0		NaN	NaN	NaN	NaN
20140904-PurClathDigest-1ug-01	714	711	8.8417	0.95976	498.21	211990	2294900	0	-5.3024	1	11.81	32.52	32.52	86.15	81.53	2.072	0	2.072	0	0	0	0		NaN	NaN	NaN	NaN
20140904-PurClathDigest-1ug-01	715	712	8.8577	0.79004	330.6	259230	2924900	0	-5.3024	1	11.8	32.54	32.54	86.6	81.99	2.071	0	2.071	0	0	0	0		NaN	NaN	NaN	NaN
20140904-PurClathDigest-1ug-01	716	713	8.8709	0.90986	447.33	194880	2387200	0	-5.3024	1	11.79	32.51	32.51	86.93	82.32	2.069	0	2.069	0	0	0	0		NaN	NaN	NaN	NaN
20140904-PurClathDigest-1ug-01	717	714	8.8861	0.95009	489.15	175170	2231600	0	-5.3024	1	11.78	32.47	32.47	87.31	82.7	2.068	0	2.068	0	0	0	0		NaN	NaN	NaN	NaN
20140904-PurClathDigest-1ug-01	718	715	8.9019	0.95993	500	175270	2188800	0	-5.3024	1	11.77	32.44	32.44	87.7	83.09	2.066	0	2.066	0	0	0	0		NaN	NaN	NaN	NaN
20140904-PurClathDigest-1ug-01	719	716	8.9179	0.9601	500	160650	2174100	0	-5.3024	1	11.76	32.4	32.4	88.1	83.49	2.064	0	2.064	0	0	0	0		NaN	NaN	NaN	NaN
20140904-PurClathDigest-1ug-01	720	717	8.9339	0.94992	494.37	228610	2349100	0	-5.3024	1	11.75	32.36	32.36	88.49	83.88	2.063	0	2.063	0	0	0	0		NaN	NaN	NaN	NaN
20140904-PurClathDigest-1ug-01	721	718	8.9497	0.82008	365.52	224630	2746100	0	-5.3024	1	11.74	32.33	32.33	88.89	84.28	2.061	0	2.061	0	0	0	0		NaN	NaN	NaN	NaN
20140904-PurClathDigest-1ug-01	722	719	8.9634	0.95987	500	153920	2178000	0	-5.3024	1	11.73	32.29	32.29	89.23	84.62	2.059	0	2.059	0	0	0	0		NaN	NaN	NaN	NaN
20140904-PurClathDigest-1ug-01	723	720	8.9794	0.86014	393.06	228190	2595100	0	-5.3024	1	11.72	32.26	32.26	89.62	85.01	2.058	0	2.058	0	0	0	0		NaN	NaN	NaN	NaN
20140904-PurClathDigest-1ug-01	724	721	8.9937	0.92989	470.15	177300	2361800	0	-5.3024	1	11.71	32.22	32.22	89.98	85.37	2.056	0	2.056	0	0	0	0		NaN	NaN	NaN	NaN
20140904-PurClathDigest-1ug-01	725	722	9.0092	0.95999	500	187750	2303300	0	-5.3024	1	11.7	32.19	32.19	90.36	85.75	2.055	0	2.055	0	0	0	0		NaN	NaN	NaN	NaN
20140904-PurClathDigest-1ug-01	726	723	9.0252	0.9601	500	163990	2183700	0	-5.3024	1	11.69	32.15	32.15	90.76	86.15	2.053	0	2.053	0	0	0	0		NaN	NaN	NaN	NaN
20140904-PurClathDigest-1ug-01	727	724	9.0412	0.94007	457.19	239250	2351800	0	-5.3024	1	11.68	32.12	32.12	91.16	86.55	2.051	0	2.051	0	0	0	0		NaN	NaN	NaN	NaN
20140904-PurClathDigest-1ug-01	728	725	9.0569	0.95982	500	153840	2202000	0	-5.3024	1	11.67	32.08	32.08	91.55	86.94	2.05	0	2.05	0	0	0	0		NaN	NaN	NaN	NaN
20140904-PurClathDigest-1ug-01	729	726	9.0729	0.97	500	164660	2156000	0	-5.3024	1	11.66	32.04	32.04	91.94	87.33	2.048	0	2.048	0	0	0	0		NaN	NaN	NaN	NaN
20140904-PurClathDigest-1ug-01	730	727	9.0891	0.86082	403.44	173940	2447800	0	-5.3024	1	11.65	32.01	32.01	92.34	87.73	2.046	0	2.046	0	0	0	0		NaN	NaN	NaN	NaN
20140904-PurClathDigest-1ug-01	731	728	9.1034	0.84921	382.46	193750	2644200	0	-5.3024	1	11.65	31.97	31.97	92.7	88.09	2.045	0	2.045	0	0	0	0		NaN	NaN	NaN	NaN
20140904-PurClathDigest-1ug-01	732	729	9.1176	0.9601	500	175310	2182800	0	-5.3024	1	11.64	31.94	31.94	93.05	88.44	2.043	0	2.043	0	0	0	0		NaN	NaN	NaN	NaN
20140904-PurClathDigest-1ug-01	733	730	9.1336	0.88995	428.09	204890	2462800	0	-5.3024	1	11.63	31.9	31.9	93.45	88.84	2.041	0	2.041	0	0	0	0		NaN	NaN	NaN	NaN
20140904-PurClathDigest-1ug-01	734	731	9.1484	0.96994	500	182140	2216600	0	-5.3024	1	11.62	31.87	31.87	93.82	89.21	2.04	0	2.04	0	0	0	0		NaN	NaN	NaN	NaN
20140904-PurClathDigest-1ug-01	735	732	9.1646	0.89001	435.45	175370	2417800	0	-5.3024	1	11.61	32.02	32.02	94.27	89.67	2.038	0	2.038	0	0	0	0		NaN	NaN	NaN	NaN
20140904-PurClathDigest-1ug-01	736	733	9.1794	0.94007	483.56	175030	2323200	0	-5.3024	1	11.61	32.17	32.17	94.7	90.09	2.037	0	2.037	0	0	0	0		NaN	NaN	NaN	NaN
20140904-PurClathDigest-1ug-01	737	734	9.1951	0.95987	496.64	197000	2269700	0	-5.3024	1	11.61	32.34	32.34	95.14	90.54	2.035	0	2.035	0	0	0	0		NaN	NaN	NaN	NaN
20140904-PurClathDigest-1ug-01	738	735	9.2111	0.91015	449.14	171700	2348500	0	-5.3024	1	11.6	32.5	32.5	95.6	91.01	2.033	0	2.033	0	0	0	0		NaN	NaN	NaN	NaN
20140904-PurClathDigest-1ug-01	739	736	9.2262	0.95999	500	164550	2230800	0	-5.3024	1	11.6	32.66	32.66	96.03	91.44	2.032	0	2.032	0	0	0	0		NaN	NaN	NaN	NaN
20140904-PurClathDigest-1ug-01	740	737	9.2422	0.88989	432.53	157430	2372500	0	-5.3024	1	11.59	32.83	32.83	96.49	91.9	2.03	0	2.03	0	0	0	0		NaN	NaN	NaN	NaN
20140904-PurClathDigest-1ug-01	741	738	9.2571	0.90008	437.94	159160	2351100	0	-5.3024	1	11.59	32.98	32.98	96.91	92.33	2.028	0	2.028	0	0	0	0		NaN	NaN	NaN	NaN
20140904-PurClathDigest-1ug-01	742	739	9.2721	0.87994	422.27	155940	2437000	0	-5.3024	1	11.59	33.14	33.14	97.34	92.76	2.027	0	2.027	0	0	0	0		NaN	NaN	NaN	NaN
20140904-PurClathDigest-1ug-01	743	740	9.2867	0.84	380.59	186020	2636800	0	-5.3024	1	11.58	33.29	33.29	97.76	93.19	2.025	0	2.025	0	0	0	0		NaN	NaN	NaN	NaN
20140904-PurClathDigest-1ug-01	744	741	9.3007	0.96027	500	209160	2253300	0	-5.3024	1	11.58	33.44	33.44	98.16	93.59	2.024	0	2.024	0	0	0	0		NaN	NaN	NaN	NaN
20140904-PurClathDigest-1ug-01	745	742	9.3167	0.96983	500	222160	2234200	0	-5.3024	1	11.57	33.61	33.61	98.61	94.05	2.022	0	2.022	0	0	0	0		NaN	NaN	NaN	NaN
20140904-PurClathDigest-1ug-01	746	743	9.3329	0.85007	391.36	200620	2497200	0	-5.3024	1	11.57	33.78	33.78	99.07	94.52	2.02	0	2.02	0	0	0	0		NaN	NaN	NaN	NaN
20140904-PurClathDigest-1ug-01	747	744	9.3471	0.87982	421.41	173750	2402300	0	-5.3024	1	11.57	33.92	33.92	99.48	94.92	2.019	0	2.019	0	0	0	0		NaN	NaN	NaN	NaN
20140904-PurClathDigest-1ug-01	748	745	9.3617	0.87999	422.35	186180	2444900	0	-5.3024	1	11.56	34.08	34.08	99.9	95.35	2.017	0	2.017	0	0	0	0		NaN	NaN	NaN	NaN
20140904-PurClathDigest-1ug-01	749	746	9.3764	0.9601	496.15	150540	2170700	0	-5.3024	1	11.56	34.23	34.23	100.3	95.77	2.016	0	2.016	0	0	0	0		NaN	NaN	NaN	NaN
20140904-PurClathDigest-1ug-01	750	747	9.3924	0.82998	366.57	210850	2778500	0	-5.3024	1	11.55	34.4	34.4	100.8	96.23	2.014	0	2.014	0	0	0	0		NaN	NaN	NaN	NaN
20140904-PurClathDigest-1ug-01	751	748	9.4062	0.8499	389.07	179730	2586700	0	-5.3024	1	11.55	34.54	34.54	101.2	96.63	2.013	0	2.013	0	0	0	0		NaN	NaN	NaN	NaN
20140904-PurClathDigest-1ug-01	752	749	9.4204	0.9601	500	167340	2155300	0	-5.3024	1	11.55	34.69	34.69	101.6	97.04	2.011	0	2.011	0	0	0	0		NaN	NaN	NaN	NaN
20140904-PurClathDigest-1ug-01	753	750	9.4364	0.90002	439.45	235410	2493900	0	-5.3024	1	11.54	34.86	34.86	102	97.5	2.009	0	2.009	0	0	0	0		NaN	NaN	NaN	NaN
20140904-PurClathDigest-1ug-01	754	751	9.4514	0.85001	389.53	206030	2592200	0	-5.3024	1	11.54	35.02	35.02	102.5	97.93	2.008	0	2.008	0	0	0	0		NaN	NaN	NaN	NaN
20140904-PurClathDigest-1ug-01	755	752	9.4656	0.90986	452.13	170190	2357900	0	-5.3024	1	11.57	35.2	35.2	102.8	98.31	2.007	0	2.007	0	0	0	0		NaN	NaN	NaN	NaN
20140904-PurClathDigest-1ug-01	756	753	9.4807	0.87015	413.23	194600	2422200	0	-5.3024	1	11.6	35.4	35.4	103.2	98.72	2.005	0	2.005	0	0	0	0		NaN	NaN	NaN	NaN
20140904-PurClathDigest-1ug-01	757	754	9.4952	0.95987	490.08	177740	2241700	0	-5.3024	1	11.63	35.59	35.59	103.6	99.11	2.004	0	2.004	0	0	0	0		NaN	NaN	NaN	NaN
20140904-PurClathDigest-1ug-01	758	755	9.5112	0.8301	370.46	226050	2651000	0	-5.3024	1	11.67	35.8	35.8	104.1	99.54	2.003	0	2.003	0	0	0	0		NaN	NaN	NaN	NaN
20140904-PurClathDigest-1ug-01	759	756	9.5251	0.95999	500	171070	2252800	0	-5.3024	1	11.69	35.98	35.98	104.4	99.91	2.002	0	2.002	0	0	0	0		NaN	NaN	NaN	NaN
20140904-PurClathDigest-1ug-01	760	757	9.5411	0.81001	354.56	170780	2653100	0	-5.3024	1	11.73	36.18	36.18	104.9	100.3	2.001	0	2.001	0	0	0	0		NaN	NaN	NaN	NaN
20140904-PurClathDigest-1ug-01	761	758	9.5546	0.95999	500	193980	2251000	0	-5.3024	1	11.75	36.36	36.36	105.2	100.7	2	0	2	0	0	0	0		NaN	NaN	NaN	NaN
20140904-PurClathDigest-1ug-01	762	759	9.5706	0.94992	489.67	156240	2226900	0	-5.3024	1	11.79	36.57	36.57	105.7	101.1	1.998	0	1.998	0	0	0	0		NaN	NaN	NaN	NaN
20140904-PurClathDigest-1ug-01	763	760	9.5864	0.96039	497.36	154040	2194700	0	-5.3024	1	11.82	36.77	36.77	106.1	101.6	1.997	0	1.997	0	0	0	0		NaN	NaN	NaN	NaN
20140904-PurClathDigest-1ug-01	764	761	9.6024	0.88961	431	154000	2368400	0	-5.3024	1	11.85	36.98	36.98	106.5	102	1.996	0	1.996	0	0	0	0		NaN	NaN	NaN	NaN
20140904-PurClathDigest-1ug-01	765	762	9.6172	0.9601	496.46	123720	2443400	0	-5.3024	1	11.88	37.17	37.17	106.9	102.4	1.995	0	1.995	0	0	0	0		NaN	NaN	NaN	NaN
20140904-PurClathDigest-1ug-01	766	763	9.6332	0.95993	500	133320	2129400	0	-5.3024	1	11.92	37.38	37.38	107.4	102.8	1.993	0	1.993	0	0	0	0		NaN	NaN	NaN	NaN
20140904-PurClathDigest-1ug-01	767	764	9.6492	0.95009	484.26	157620	2250200	0	-5.3024	1	11.95	37.59	37.59	107.8	103.3	1.992	0	1.992	0	0	0	0		NaN	NaN	NaN	NaN
20140904-PurClathDigest-1ug-01	768	765	9.6651	0.93996	475.29	132990	2228100	0	-5.3024	1	11.98	37.8	37.8	108.2	103.7	1.991	0	1.991	0	0	0	0		NaN	NaN	NaN	NaN
20140904-PurClathDigest-1ug-01	769	766	9.6807	0.8	343.4	186980	2726400	0	-5.3024	1	12.01	38	38	108.7	104.1	1.99	0	1.99	0	0	0	0		NaN	NaN	NaN	NaN
20140904-PurClathDigest-1ug-01	770	767	9.6941	0.91003	446.35	140200	2318600	0	-5.3024	1	12.04	38.17	38.17	109	104.5	1.989	0	1.989	0	0	0	0		NaN	NaN	NaN	NaN
20140904-PurClathDigest-1ug-01	771	768	9.7092	0.95987	500	145120	2181200	0	-5.3024	1	12.07	38.37	38.37	109.4	104.9	1.987	0	1.987	0	0	0	0		NaN	NaN	NaN	NaN
20140904-PurClathDigest-1ug-01	772	769	9.7252	0.9201	465.81	171060	2327200	0	-5.3024	1	12.1	38.58	38.58	109.9	105.3	1.986	0	1.986	0	0	0	0		NaN	NaN	NaN	NaN
20140904-PurClathDigest-1ug-01	773	770	9.7406	0.84	380.03	177050	2572400	0	-5.3024	1	12.14	38.78	38.78	110.3	105.7	1.985	0	1.985	0	0	0	0		NaN	NaN	NaN	NaN
20140904-PurClathDigest-1ug-01	774	771	9.7546	0.87009	410.37	230140	2581900	0	-5.3024	1	12.17	38.94	38.94	110.5	106	1.983	0	1.983	0	0	0	0		NaN	NaN	NaN	NaN
20140904-PurClathDigest-1ug-01	775	772	9.7691	0.82981	366.71	190370	2767400	0	-5.3024	1	12.21	39.08	39.08	110.6	106	1.981	0	1.981	0	0	0	0		NaN	NaN	NaN	NaN
20140904-PurClathDigest-1ug-01	776	773	9.7829	0.8	334.95	173870	2809100	0	-5.3024	1	12.26	39.21	39.21	110.6	106.1	1.979	0	1.979	0	0	0	0		NaN	NaN	NaN	NaN
20140904-PurClathDigest-1ug-01	777	774	9.7962	0.89012	428.82	163770	2365800	0	-5.3024	1	12.3	39.33	39.33	110.6	106.1	1.977	0	1.977	0	0	0	0		NaN	NaN	NaN	NaN
20140904-PurClathDigest-1ug-01	778	775	9.8111	0.82998	366.53	201490	2700200	0	-5.3024	1	12.34	39.47	39.47	110.7	106.1	1.974	0	1.974	0	0	0	0		NaN	NaN	NaN	NaN
20140904-PurClathDigest-1ug-01	779	776	9.8249	0.76	297.23	196170	3009600	0	-5.3024	1	12.39	39.6	39.6	110.7	106.2	1.972	0	1.972	0	0	0	0		NaN	NaN	NaN	NaN
20140904-PurClathDigest-1ug-01	780	777	9.8376	0.94992	481.15	157280	2273900	0	-5.3024	1	12.42	39.72	39.72	110.7	106.2	1.97	0	1.97	0	0	0	0		NaN	NaN	NaN	NaN
20140904-PurClathDigest-1ug-01	781	778	9.8534	0.9601	500	190590	2230500	0	-5.3024	1	12.47	39.87	39.87	110.7	106.2	1.968	0	1.968	0	0	0	0		NaN	NaN	NaN	NaN
20140904-PurClathDigest-1ug-01	782	779	9.8694	0.8602	402.78	167800	2516700	0	-5.3024	1	12.52	40.01	40.01	110.8	106.2	1.965	0	1.965	0	0	0	0		NaN	NaN	NaN	NaN
20140904-PurClathDigest-1ug-01	783	780	9.8837	0.88966	429.31	237910	2593600	0	-5.3024	1	12.57	40.15	40.15	110.8	106.3	1.963	0	1.963	0	0	0	0		NaN	NaN	NaN	NaN
20140904-PurClathDigest-1ug-01	784	781	9.8986	0.9601	500	165270	2269100	0	-5.3024	1	12.61	40.29	40.29	110.8	106.3	1.961	0	1.961	0	0	0	0		NaN	NaN	NaN	NaN
20140904-PurClathDigest-1ug-01	785	782	9.9146	0.87994	422.56	205090	2551200	0	-5.3024	1	12.66	40.44	40.44	110.9	106.3	1.958	0	1.958	0	0	0	0		NaN	NaN	NaN	NaN
20140904-PurClathDigest-1ug-01	786	783	9.9292	0.90008	444.14	202640	2500200	0	-5.3024	1	12.71	40.57	40.57	110.9	106.4	1.956	0	1.956	0	0	0	0		NaN	NaN	NaN	NaN
20140904-PurClathDigest-1ug-01	787	784	9.9442	0.81001	337.43	263690	2917100	0	-5.3024	1	12.75	40.71	40.71	110.9	106.4	1.953	0	1.953	0	0	0	0		NaN	NaN	NaN	NaN
20140904-PurClathDigest-1ug-01	788	785	9.9577	0.92079	461.77	167110	2380500	0	-5.3024	1	12.8	40.84	40.84	111	106.4	1.951	0	1.951	0	0	0	0		NaN	NaN	NaN	NaN
20140904-PurClathDigest-1ug-01	789	786	9.9731	0.91913	454.91	159540	2309600	0	-5.3024	1	12.84	40.98	40.98	111	106.5	1.949	0	1.949	0	0	0	0		NaN	NaN	NaN	NaN
20140904-PurClathDigest-1ug-01	790	787	9.9884	0.91078	454.64	197320	2438200	0	-5.3024	1	12.89	41.12	41.12	111	106.5	1.946	0	1.946	0	0	0	0		NaN	NaN	NaN	NaN
20140904-PurClathDigest-1ug-01	791	788	10.004	0.9193	458.87	172460	2349200	0	-5.3024	1	12.94	41.26	41.26	111	106.5	1.944	0	1.944	0	0	0	0		NaN	NaN	NaN	NaN
20140904-PurClathDigest-1ug-01	792	789	10.019	0.97	500	138600	2178800	0	-5.3024	1	12.98	41.41	41.41	111.1	106.6	1.941	0	1.941	0	0	0	0		NaN	NaN	NaN	NaN
20140904-PurClathDigest-1ug-01	793	790	10.035	0.95999	500	146320	2197400	0	-5.3024	1	13.03	41.56	41.56	111.1	106.6	1.939	0	1.939	0	0	0	0		NaN	NaN	NaN	NaN
20140904-PurClathDigest-1ug-01	794	791	10.051	0.74987	284.83	210410	2929700	0	-5.3024	1	13.08	41.7	41.7	111.1	106.6	1.937	0	1.937	0	0	0	0		NaN	NaN	NaN	NaN
20140904-PurClathDigest-1ug-01	795	792	10.064	0.90002	441.87	165180	2412100	0	-5.3024	1	13.08	41.76	41.76	111.1	106.6	1.945	0	1.945	0	0	0	0		NaN	NaN	NaN	NaN
20140904-PurClathDigest-1ug-01	796	793	10.079	0.94002	483.14	151470	2364200	0	-5.3024	1	13.09	41.83	41.83	111	106.4	1.955	0	1.955	0	0	0	0		NaN	NaN	NaN	NaN
20140904-PurClathDigest-1ug-01	797	794	10.094	0.9601	500	160380	2276800	0	-5.3024	1	13.09	41.9	41.9	110.9	106.3	1.965	0	1.965	0	0	0	0		NaN	NaN	NaN	NaN
20140904-PurClathDigest-1ug-01	798	795	10.11	0.86987	413.7	194730	2555000	0	-5.3024	1	13.09	41.97	41.97	110.8	106.2	1.975	0	1.975	0	0	0	0		NaN	NaN	NaN	NaN
20140904-PurClathDigest-1ug-01	799	796	10.125	0.9601	500	148210	2182500	0	-5.3024	1	13.09	42.04	42.04	110.7	106.1	1.984	0	1.984	0	0	0	0		NaN	NaN	NaN	NaN
20140904-PurClathDigest-1ug-01	800	797	10.141	0.89001	408.88	217210	2566000	0	-5.3024	1	13.09	42.12	42.12	110.6	106	1.994	0	1.994	0	0	0	0		NaN	NaN	NaN	NaN
20140904-PurClathDigest-1ug-01	801	798	10.156	0.93012	475.48	144270	2253800	0	-5.3024	1	13.1	42.18	42.18	110.5	105.9	2.004	0	2.004	0	0	0	0		NaN	NaN	NaN	NaN
20140904-PurClathDigest-1ug-01	802	799	10.171	0.7699	308.25	213100	2943100	0	-5.3024	1	13.1	42.25	42.25	110.5	105.8	2.013	0	2.013	0	0	0	0		NaN	NaN	NaN	NaN
20140904-PurClathDigest-1ug-01	803	800	10.184	0.8099	345.6	215280	2753700	0	-5.3024	1	13.1	42.31	42.31	110.4	105.7	2.022	0	2.022	0	0	0	0		NaN	NaN	NaN	NaN
20140904-PurClathDigest-1ug-01	804	801	10.197	0.87999	412.81	265080	2591200	0	-5.3024	1	13.1	42.38	42.38	110.3	105.6	2.03	0	2.03	0	0	0	0		NaN	NaN	NaN	NaN
20140904-PurClathDigest-1ug-01	805	802	10.212	0.8	344.09	207310	2733200	0	-5.3024	1	13.1	42.44	42.44	110.2	105.5	2.039	0	2.039	0	0	0	0		NaN	NaN	NaN	NaN
20140904-PurClathDigest-1ug-01	806	803	10.225	0.94007	478.59	140390	2220800	0	-5.3024	1	13.11	42.51	42.51	110.1	105.4	2.048	0	2.048	0	0	0	0		NaN	NaN	NaN	NaN
20140904-PurClathDigest-1ug-01	807	804	10.241	0.96022	500	175820	2251600	0	-5.3024	1	13.11	42.58	42.58	110.1	105.3	2.058	0	2.058	0	0	0	0		NaN	NaN	NaN	NaN
20140904-PurClathDigest-1ug-01	808	805	10.257	0.79971	335.85	208680	2774300	0	-5.3024	1	13.11	42.65	42.65	110	105.2	2.068	0	2.068	0	0	0	0		NaN	NaN	NaN	NaN
20140904-PurClathDigest-1ug-01	809	806	10.27	0.86082	396.32	207740	2658100	0	-5.3024	1	13.11	42.71	42.71	109.9	105.1	2.076	0	2.076	0	0	0	0		NaN	NaN	NaN	NaN
20140904-PurClathDigest-1ug-01	810	807	10.285	0.85928	400.73	179230	2601900	0	-5.3024	1	13.12	42.78	42.78	109.8	105	2.086	0	2.086	0	0	0	0		NaN	NaN	NaN	NaN
20140904-PurClathDigest-1ug-01	811	808	10.299	0.95999	500	151000	2247800	0	-5.3024	1	13.12	42.84	42.84	109.7	104.9	2.095	0	2.095	0	0	0	0		NaN	NaN	NaN	NaN
20140904-PurClathDigest-1ug-01	812	809	10.315	0.95999	500	167040	2253200	0	-5.3024	1	13.12	42.92	42.92	109.6	104.8	2.105	0	2.105	0	0	0	0		NaN	NaN	NaN	NaN
20140904-PurClathDigest-1ug-01	813	810	10.331	0.88989	432.07	184950	2422100	0	-5.3024	1	13.12	42.99	42.99	109.6	104.7	2.115	0	2.115	0	0	0	0		NaN	NaN	NaN	NaN
20140904-PurClathDigest-1ug-01	814	811	10.346	0.82003	361.19	177440	2656000	0	-5.3024	1	13.12	43.06	43.06	109.5	104.6	2.124	0	2.124	0	0	0	0		NaN	NaN	NaN	NaN
20140904-PurClathDigest-1ug-01	815	812	10.36	0.95009	486.76	144630	2265400	0	-5.3024	1	13.12	43.3	43.3	109.5	104.6	2.125	0	2.125	0	0	0	0		NaN	NaN	NaN	NaN
20140904-PurClathDigest-1ug-01	816	813	10.375	0.97	500	168630	2221200	0	-5.3024	1	13.12	43.65	43.65	109.6	104.7	2.121	0	2.121	0	0	0	0		NaN	NaN	NaN	NaN
20140904-PurClathDigest-1ug-01	817	814	10.392	0.95999	496.45	158290	2218400	0	-5.3024	1	13.12	44.02	44.02	109.7	104.8	2.117	0	2.117	0	0	0	0		NaN	NaN	NaN	NaN
20140904-PurClathDigest-1ug-01	818	815	10.408	0.84	366.24	169920	2634800	0	-5.3024	1	13.12	44.38	44.38	109.8	104.9	2.113	0	2.113	0	0	0	0		NaN	NaN	NaN	NaN
20140904-PurClathDigest-1ug-01	819	816	10.422	0.96004	498.42	159500	2272100	0	-5.3024	1	13.12	44.69	44.69	109.9	105	2.11	0	2.11	0	0	0	0		NaN	NaN	NaN	NaN
20140904-PurClathDigest-1ug-01	820	817	10.438	0.80996	349.91	192790	2729100	0	-5.3024	1	13.12	45.05	45.05	110	105.1	2.106	0	2.106	0	0	0	0		NaN	NaN	NaN	NaN
20140904-PurClathDigest-1ug-01	821	818	10.451	0.95003	486.56	168630	2364400	0	-5.3024	1	13.12	45.36	45.36	110.1	105.2	2.103	0	2.103	0	0	0	0		NaN	NaN	NaN	NaN
20140904-PurClathDigest-1ug-01	822	819	10.467	0.9399	484.46	155840	2332200	0	-5.3024	1	13.12	45.71	45.71	110.1	105.3	2.099	0	2.099	0	0	0	0		NaN	NaN	NaN	NaN
20140904-PurClathDigest-1ug-01	823	820	10.483	0.95999	500	188250	2281400	0	-5.3024	1	13.12	46.07	46.07	110.2	105.4	2.095	0	2.095	0	0	0	0		NaN	NaN	NaN	NaN
20140904-PurClathDigest-1ug-01	824	821	10.499	0.85012	386.55	219040	2718700	0	-5.3024	1	13.12	46.43	46.43	110.3	105.5	2.092	0	2.092	0	0	0	0		NaN	NaN	NaN	NaN
20140904-PurClathDigest-1ug-01	825	822	10.513	0.87988	416.18	235680	2652600	0	-5.3024	1	13.12	46.75	46.75	110.4	105.6	2.088	0	2.088	0	0	0	0		NaN	NaN	NaN	NaN
20140904-PurClathDigest-1ug-01	826	823	10.527	0.76012	299.24	228480	3077000	0	-5.3024	1	13.12	47.08	47.08	110.5	105.7	2.085	0	2.085	0	0	0	0		NaN	NaN	NaN	NaN
20140904-PurClathDigest-1ug-01	827	824	10.54	0.89991	441.08	220210	2546400	0	-5.3024	1	13.12	47.36	47.36	110.6	105.8	2.082	0	2.082	0	0	0	0		NaN	NaN	NaN	NaN
20140904-PurClathDigest-1ug-01	828	825	10.555	0.81997	350.07	196120	2798300	0	-5.3024	1	13.12	47.7	47.7	110.7	105.9	2.078	0	2.078	0	0	0	0		NaN	NaN	NaN	NaN
20140904-PurClathDigest-1ug-01	829	826	10.569	0.89012	428.9	197820	2521900	0	-5.3024	1	13.12	48.01	48.01	110.8	106	2.075	0	2.075	0	0	0	0		NaN	NaN	NaN	NaN
20140904-PurClathDigest-1ug-01	830	827	10.584	0.95987	500	154280	2251500	0	-5.3024	1	13.12	48.34	48.34	110.9	106.1	2.071	0	2.071	0	0	0	0		NaN	NaN	NaN	NaN
20140904-PurClathDigest-1ug-01	831	828	10.6	0.83004	373.74	184310	2680000	0	-5.3024	1	13.12	48.7	48.7	110.9	106.2	2.068	0	2.068	0	0	0	0		NaN	NaN	NaN	NaN
20140904-PurClathDigest-1ug-01	832	829	10.613	0.82998	366.09	271000	2874400	0	-5.3024	1	13.12	49.02	49.02	111	106.3	2.064	0	2.064	0	0	0	0		NaN	NaN	NaN	NaN
20140904-PurClathDigest-1ug-01	833	830	10.627	0.73997	280.46	274560	3341500	0	-5.3024	1	13.12	49.33	49.33	111.1	106.4	2.061	0	2.061	0	0	0	0		NaN	NaN	NaN	NaN
20140904-PurClathDigest-1ug-01	834	831	10.64	0.9601	487.38	178340	2358300	0	-5.3024	1	13.12	49.61	49.61	111.2	106.5	2.058	0	2.058	0	0	0	0		NaN	NaN	NaN	NaN
20140904-PurClathDigest-1ug-01	835	832	10.656	0.9601	500	179390	2318700	0	-5.3024	1	13.12	49.86	49.86	111.2	106.5	2.058	0	2.058	0	0	0	0		NaN	NaN	NaN	NaN
20140904-PurClathDigest-1ug-01	836	833	10.672	0.86981	405.05	249470	2757200	0	-5.3024	1	13.12	49.93	49.93	111.2	106.4	2.066	0	2.066	0	0	0	0		NaN	NaN	NaN	NaN
20140904-PurClathDigest-1ug-01	837	834	10.686	0.93	470.85	160310	2368100	0	-5.3024	1	13.11	49.99	49.99	111.1	106.3	2.073	0	2.073	0	0	0	0		NaN	NaN	NaN	NaN
20140904-PurClathDigest-1ug-01	838	835	10.702	0.84011	380.46	203300	2725100	0	-5.3024	1	13.11	50.05	50.05	111	106.2	2.08	0	2.08	0	0	0	0		NaN	NaN	NaN	NaN
20140904-PurClathDigest-1ug-01	839	836	10.716	0.89001	429.99	168280	2475200	0	-5.3024	1	13.1	50.1	50.1	110.9	106.2	2.087	0	2.087	0	0	0	0		NaN	NaN	NaN	NaN
20140904-PurClathDigest-1ug-01	840	837	10.73	0.93996	473.76	162480	2345300	0	-5.3024	1	13.1	50.16	50.16	110.9	106.1	2.094	0	2.094	0	0	0	0		NaN	NaN	NaN	NaN
20140904-PurClathDigest-1ug-01	841	838	10.746	0.77991	318.4	227630	3057700	0	-5.3024	1	13.09	50.22	50.22	110.8	106	2.101	0	2.101	0	0	0	0		NaN	NaN	NaN	NaN
20140904-PurClathDigest-1ug-01	842	839	10.759	0.85001	383.46	179570	2670500	0	-5.3024	1	13.09	50.28	50.28	110.7	105.9	2.107	0	2.107	0	0	0	0		NaN	NaN	NaN	NaN
20140904-PurClathDigest-1ug-01	843	840	10.773	0.94007	456.62	180320	2453600	0	-5.3024	1	13.09	50.33	50.33	110.7	105.8	2.114	0	2.114	0	0	0	0		NaN	NaN	NaN	NaN
20140904-PurClathDigest-1ug-01	844	841	10.789	0.83004	373.25	195650	2737800	0	-5.3024	1	13.08	50.39	50.39	110.6	105.7	2.122	0	2.122	0	0	0	0		NaN	NaN	NaN	NaN
20140904-PurClathDigest-1ug-01	845	842	10.803	0.82066	360.61	201440	2713400	0	-5.3024	1	13.08	50.45	50.45	110.5	105.6	2.128	0	2.128	0	0	0	0		NaN	NaN	NaN	NaN
20140904-PurClathDigest-1ug-01	846	843	10.816	0.88921	426.38	170960	2454300	0	-5.3024	1	13.07	50.5	50.5	110.5	105.5	2.135	0	2.135	0	0	0	0		NaN	NaN	NaN	NaN
20140904-PurClathDigest-1ug-01	847	844	10.831	0.8	342.03	230390	2864700	0	-5.3024	1	13.07	50.56	50.56	110.4	105.5	2.142	0	2.142	0	0	0	0		NaN	NaN	NaN	NaN
20140904-PurClathDigest-1ug-01	848	845	10.845	0.85012	389.49	219800	2690900	0	-5.3024	1	13.06	50.62	50.62	110.3	105.4	2.148	0	2.148	0	0	0	0		NaN	NaN	NaN	NaN
20140904-PurClathDigest-1ug-01	849	846	10.859	0.73997	284.66	280380	3344100	0	-5.3024	1	13.06	50.67	50.67	110.3	105.3	2.155	0	2.155	0	0	0	0		NaN	NaN	NaN	NaN
20140904-PurClathDigest-1ug-01	850	847	10.871	0.91003	447.85	170940	2513400	0	-5.3024	1	13.06	50.72	50.72	110.2	105.2	2.161	0	2.161	0	0	0	0		NaN	NaN	NaN	NaN
20140904-PurClathDigest-1ug-01	851	848	10.886	0.85991	398.3	204270	2705700	0	-5.3024	1	13.05	50.78	50.78	110.1	105.1	2.168	0	2.168	0	0	0	0		NaN	NaN	NaN	NaN
20140904-PurClathDigest-1ug-01	852	849	10.901	0.81007	346.41	203120	2888600	0	-5.3024	1	13.05	50.84	50.84	110.1	105	2.175	0	2.175	0	0	0	0		NaN	NaN	NaN	NaN
20140904-PurClathDigest-1ug-01	853	850	10.914	0.78999	330.94	220440	2964100	0	-5.3024	1	13.04	50.89	50.89	110	105	2.181	0	2.181	0	0	0	0		NaN	NaN	NaN	NaN
20140904-PurClathDigest-1ug-01	854	851	10.927	0.92995	464.2	172590	2403800	0	-5.3024	1	13.04	50.95	50.95	109.9	104.9	2.188	0	2.188	0	0	0	0		NaN	NaN	NaN	NaN
20140904-PurClathDigest-1ug-01	855	852	10.943	0.85007	380.27	206280	2751400	0	-5.3024	1	13.04	51.01	51.01	109.9	104.8	2.195	0	2.195	0	0	0	0		NaN	NaN	NaN	NaN
20140904-PurClathDigest-1ug-01	856	853	10.957	0.92989	468.01	159260	2344800	0	-5.3024	1	13.03	51.05	51.05	109.9	104.8	2.203	0	2.203	0	0	0	0		NaN	NaN	NaN	NaN
20140904-PurClathDigest-1ug-01	857	854	10.972	0.90014	436.06	168350	2474400	0	-5.3024	1	13.02	51.08	51.08	110	104.9	2.213	0	2.213	0	0	0	0		NaN	NaN	NaN	NaN
20140904-PurClathDigest-1ug-01	858	855	10.987	0.81997	362.56	190140	2756800	0	-5.3024	1	13.02	51.1	51.1	110.2	105	2.223	0	2.223	0	0	0	0		NaN	NaN	NaN	NaN
20140904-PurClathDigest-1ug-01	859	856	11.001	0.91999	464.06	163440	2439900	0	-5.3024	1	13.01	51.12	51.12	110.3	105.1	2.232	0	2.232	0	0	0	0		NaN	NaN	NaN	NaN
20140904-PurClathDigest-1ug-01	860	857	11.016	0.94002	481.34	164200	2376200	0	-5.3024	1	13	51.15	51.15	110.4	105.2	2.242	0	2.242	0	0	0	0		NaN	NaN	NaN	NaN
20140904-PurClathDigest-1ug-01	861	858	11.032	0.90992	451.86	183490	2458100	0	-5.3024	1	13	51.18	51.18	110.6	105.4	2.253	0	2.253	0	0	0	0		NaN	NaN	NaN	NaN
20140904-PurClathDigest-1ug-01	862	859	11.047	0.95999	498.8	151840	2320100	0	-5.3024	1	12.99	51.2	51.2	110.7	105.5	2.263	0	2.263	0	0	0	0		NaN	NaN	NaN	NaN
20140904-PurClathDigest-1ug-01	863	860	11.063	0.87999	413.63	179800	2571300	0	-5.3024	1	12.98	51.23	51.23	110.8	105.6	2.273	0	2.273	0	0	0	0		NaN	NaN	NaN	NaN
20140904-PurClathDigest-1ug-01	864	861	11.078	0.91009	447.22	165610	2490300	0	-5.3024	1	12.98	51.26	51.26	111	105.7	2.283	0	2.283	0	0	0	0		NaN	NaN	NaN	NaN
20140904-PurClathDigest-1ug-01	865	862	11.093	0.92989	475.81	152040	2329000	0	-5.3024	1	12.97	51.28	51.28	111.1	105.8	2.293	0	2.293	0	0	0	0		NaN	NaN	NaN	NaN
20140904-PurClathDigest-1ug-01	866	863	11.109	0.91003	451.43	151740	2440100	0	-5.3024	1	12.96	51.31	51.31	111.2	105.9	2.303	0	2.303	0	0	0	0		NaN	NaN	NaN	NaN
20140904-PurClathDigest-1ug-01	867	864	11.124	0.89996	441.43	159890	2548300	0	-5.3024	1	12.95	51.34	51.34	111.4	106	2.313	0	2.313	0	0	0	0		NaN	NaN	NaN	NaN
20140904-PurClathDigest-1ug-01	868	865	11.139	0.89012	431.32	178270	2529700	0	-5.3024	1	12.95	51.36	51.36	111.5	106.2	2.323	0	2.323	0	0	0	0		NaN	NaN	NaN	NaN
20140904-PurClathDigest-1ug-01	869	866	11.154	0.91988	462.95	176090	2474100	0	-5.3024	1	12.94	51.39	51.39	111.6	106.3	2.333	0	2.333	0	0	0	0		NaN	NaN	NaN	NaN
20140904-PurClathDigest-1ug-01	870	867	11.169	0.85081	389.39	257080	2814800	0	-5.3024	1	12.93	51.41	51.41	111.8	106.4	2.343	0	2.343	0	0	0	0		NaN	NaN	NaN	NaN
20140904-PurClathDigest-1ug-01	871	868	11.183	0.86924	408.87	215570	2745900	0	-5.3024	1	12.93	51.44	51.44	111.9	106.5	2.353	0	2.353	0	0	0	0		NaN	NaN	NaN	NaN
20140904-PurClathDigest-1ug-01	872	869	11.198	0.89006	430.01	168590	2547100	0	-5.3024	1	12.92	51.46	51.46	112	106.6	2.362	0	2.362	0	0	0	0		NaN	NaN	NaN	NaN
20140904-PurClathDigest-1ug-01	873	870	11.212	0.70993	251.33	308320	3675500	0	-5.3024	1	12.91	51.49	51.49	112.2	106.7	2.372	0	2.372	0	0	0	0		NaN	NaN	NaN	NaN
20140904-PurClathDigest-1ug-01	874	871	11.224	0.95009	486.64	156130	2353000	0	-5.3024	1	12.91	51.51	51.51	112.3	106.8	2.38	0	2.38	0	0	0	0		NaN	NaN	NaN	NaN
20140904-PurClathDigest-1ug-01	875	872	11.24	0.87999	423.13	219360	2643300	0	-5.3024	1	12.9	51.54	51.54	112.4	106.9	2.39	0	2.39	0	0	0	0		NaN	NaN	NaN	NaN
20140904-PurClathDigest-1ug-01	876	873	11.255	0.83988	379.26	268860	2919200	0	-5.3024	1	12.89	51.48	51.48	112.6	107.1	2.397	0	2.397	0	0	0	0		NaN	NaN	NaN	NaN
20140904-PurClathDigest-1ug-01	877	874	11.269	0.84011	379.64	190270	2766800	0	-5.3024	1	12.87	51.27	51.27	112.9	107.4	2.399	0	2.399	0	0	0	0		NaN	NaN	NaN	NaN
20140904-PurClathDigest-1ug-01	878	875	11.283	0.78993	328.8	235490	3112200	0	-5.3024	1	12.84	51.05	51.05	113.2	107.6	2.401	0	2.401	0	0	0	0		NaN	NaN	NaN	NaN
20140904-PurClathDigest-1ug-01	879	876	11.296	0.88011	418.23	234400	2728800	0	-5.3024	1	12.82	50.85	50.85	113.5	107.9	2.403	0	2.403	0	0	0	0		NaN	NaN	NaN	NaN
20140904-PurClathDigest-1ug-01	880	877	11.311	0.78987	329.4	261830	3183000	0	-5.3024	1	12.79	50.63	50.63	113.8	108.2	2.405	0	2.405	0	0	0	0		NaN	NaN	NaN	NaN
20140904-PurClathDigest-1ug-01	881	878	11.324	0.86998	407.46	217430	2780500	0	-5.3024	1	12.77	50.43	50.43	114.1	108.5	2.407	0	2.407	0	0	0	0		NaN	NaN	NaN	NaN
20140904-PurClathDigest-1ug-01	882	879	11.338	0.73013	269.77	302700	3541100	0	-5.3024	1	12.75	50.21	50.21	114.4	108.8	2.408	0	2.408	0	0	0	0		NaN	NaN	NaN	NaN
20140904-PurClathDigest-1ug-01	883	880	11.35	0.77997	320.56	299380	3253100	0	-5.3024	1	12.73	50.02	50.02	114.6	109	2.41	0	2.41	0	0	0	0		NaN	NaN	NaN	NaN
20140904-PurClathDigest-1ug-01	884	881	11.363	0.76	292.02	234870	3434600	0	-5.3024	1	12.71	49.82	49.82	114.9	109.3	2.412	0	2.412	0	0	0	0		NaN	NaN	NaN	NaN
20140904-PurClathDigest-1ug-01	885	882	11.376	0.87994	423.38	218860	2687600	0	-5.3024	1	12.68	49.63	49.63	115.2	109.5	2.414	0	2.414	0	0	0	0		NaN	NaN	NaN	NaN
20140904-PurClathDigest-1ug-01	886	883	11.391	0.86008	400.92	200850	2747700	0	-5.3024	1	12.66	49.41	49.41	115.5	109.8	2.415	0	2.415	0	0	0	0		NaN	NaN	NaN	NaN
20140904-PurClathDigest-1ug-01	887	884	11.405	0.94002	476.19	155570	2401500	0	-5.3024	1	12.64	49.19	49.19	115.8	110.1	2.417	0	2.417	0	0	0	0		NaN	NaN	NaN	NaN
20140904-PurClathDigest-1ug-01	888	885	11.421	0.94997	480.67	155730	2413700	0	-5.3024	1	12.61	48.95	48.95	116.1	110.4	2.419	0	2.419	0	0	0	0		NaN	NaN	NaN	NaN
20140904-PurClathDigest-1ug-01	889	886	11.437	0.98001	500	148760	2296700	0	-5.3024	1	12.58	48.71	48.71	116.4	110.8	2.422	0	2.422	0	0	0	0		NaN	NaN	NaN	NaN
20140904-PurClathDigest-1ug-01	890	887	11.453	0.81991	354.8	233920	3007900	0	-5.3024	1	12.55	48.46	48.46	116.8	111.1	2.424	0	2.424	0	0	0	0		NaN	NaN	NaN	NaN
20140904-PurClathDigest-1ug-01	891	888	11.467	0.89996	442.26	185870	2569000	0	-5.3024	1	12.53	48.25	48.25	117.1	111.4	2.425	0	2.425	0	0	0	0		NaN	NaN	NaN	NaN
20140904-PurClathDigest-1ug-01	892	889	11.482	0.81013	350.61	230170	3078500	0	-5.3024	1	12.51	48.02	48.02	117.4	111.7	2.427	0	2.427	0	0	0	0		NaN	NaN	NaN	NaN
20140904-PurClathDigest-1ug-01	893	890	11.495	0.81997	355.5	234120	2992600	0	-5.3024	1	12.48	47.82	47.82	117.7	111.9	2.429	0	2.429	0	0	0	0		NaN	NaN	NaN	NaN
20140904-PurClathDigest-1ug-01	894	891	11.509	0.87999	416.48	199070	2689200	0	-5.3024	1	12.46	47.61	47.61	117.9	112.2	2.431	0	2.431	0	0	0	0		NaN	NaN	NaN	NaN
20140904-PurClathDigest-1ug-01	895	892	11.523	0.87994	421.46	199640	2682800	0	-5.3024	1	12.44	47.38	47.38	118.3	112.5	2.433	0	2.433	0	0	0	0		NaN	NaN	NaN	NaN
20140904-PurClathDigest-1ug-01	896	893	11.538	0.8	334.17	225920	3100200	0	-5.3024	1	12.41	47.16	47.16	118.6	112.8	2.435	0	2.435	0	0	0	0		NaN	NaN	NaN	NaN
20140904-PurClathDigest-1ug-01	897	894	11.551	0.84011	376.78	218110	2923500	0	-5.3024	1	12.39	46.96	46.96	118.9	113.1	2.438	0	2.438	0	0	7.373E-05	0	0	NaN	NaN	NaN	NaN
20140904-PurClathDigest-1ug-01	898	895	11.565	0.85997	402.85	192750	2717800	0	-5.3024	1	12.34	46.75	46.75	119.4	113.6	2.459	0	2.459	0	0	0.0008146	0	0	NaN	NaN	NaN	NaN
20140904-PurClathDigest-1ug-01	899	896	11.58	0.91003	452.55	169560	2482300	0	-5.3024	1	12.3	46.54	46.54	119.9	114.1	2.479	0	2.479	0	0	0.001573	0	0	NaN	NaN	NaN	NaN
20140904-PurClathDigest-1ug-01	900	897	11.595	0.88989	422.58	202620	2635200	0	-5.3024	1	12.25	46.32	46.32	120.5	114.6	2.501	0	2.501	0	0	0.002375	0	0	NaN	NaN	NaN	NaN
20140904-PurClathDigest-1ug-01	901	898	11.61	0.81007	350.4	209410	2964700	0	-5.3024	1	12.21	46.1	46.1	121.1	115.1	2.522	0	2.522	0	0	0.00316	0	0	NaN	NaN	NaN	NaN
20140904-PurClathDigest-1ug-01	902	899	11.623	0.7707	310.34	234760	3149100	0	-5.3024	1	12.17	45.91	45.91	121.6	115.6	2.541	0	2.541	0	0	0.003875	0	0	NaN	NaN	NaN	NaN
20140904-PurClathDigest-1ug-01	903	900	11.636	0.71943	260.32	241690	3426000	0	-5.3024	1	12.13	45.72	45.72	122.1	116.1	2.559	0	2.559	0	0	0.004554	0	0	NaN	NaN	NaN	NaN
20140904-PurClathDigest-1ug-01	904	901	11.648	0.86987	412.86	197730	2695800	0	-5.3024	1	12.09	45.54	45.54	122.5	116.5	2.577	0	2.577	0	0	0.005189	0	0	NaN	NaN	NaN	NaN
20140904-PurClathDigest-1ug-01	905	902	11.663	0.79994	335.17	257220	3045100	0	-5.3024	1	12.05	45.33	45.33	123.1	117	2.597	0	2.597	0	0	0.005956	0	0	NaN	NaN	NaN	NaN
20140904-PurClathDigest-1ug-01	906	903	11.676	0.87999	416.28	188600	2663700	0	-5.3024	1	12.01	45.14	45.14	123.6	117.4	2.616	0	2.616	0	0	0.006661	0	0	NaN	NaN	NaN	NaN
20140904-PurClathDigest-1ug-01	907	904	11.691	0.93006	472.27	195730	2473000	0	-5.3024	1	11.96	44.92	44.92	124.1	117.9	2.637	0	2.637	0	0	0.007437	0	0	NaN	NaN	NaN	NaN
20140904-PurClathDigest-1ug-01	908	905	11.706	0.75994	294.87	239170	3269700	0	-5.3024	1	11.92	44.69	44.69	124.7	118.5	2.659	0	2.659	0	0	0.008257	0	0	NaN	NaN	NaN	NaN
20140904-PurClathDigest-1ug-01	909	906	11.719	0.73997	284.71	277190	3390900	0	-5.3024	1	11.88	44.51	44.51	125.2	118.9	2.678	0	2.678	0	0	0.008927	0	0	NaN	NaN	NaN	NaN
20140904-PurClathDigest-1ug-01	910	907	11.731	0.78999	327.83	278310	3168400	0	-5.3024	1	11.84	44.33	44.33	125.6	119.4	2.695	0	2.695	0	0	0.00958	0	0	NaN	NaN	NaN	NaN
20140904-PurClathDigest-1ug-01	911	908	11.744	0.80011	339.91	249790	3114300	0	-5.3024	1	11.8	44.14	44.14	126.1	119.8	2.714	0	2.714	0	0	0.01028	0	0	NaN	NaN	NaN	NaN
20140904-PurClathDigest-1ug-01	912	909	11.758	0.86008	402.14	229590	2770600	0	-5.3024	1	11.76	43.94	43.94	126.6	120.3	2.733	0	2.733	0	0	0.01098	0	0	NaN	NaN	NaN	NaN
20140904-PurClathDigest-1ug-01	913	910	11.772	0.78993	326.5	284210	3186200	0	-5.3024	1	11.72	43.73	43.73	127.2	120.8	2.754	0	2.754	0	0	0.01174	0	0	NaN	NaN	NaN	NaN
20140904-PurClathDigest-1ug-01	914	911	11.785	0.90019	436.12	193970	2584600	0	-5.3024	1	11.68	43.54	43.54	127.7	121.2	2.772	0	2.772	0	0	0.01244	0	0	NaN	NaN	NaN	NaN
20140904-PurClathDigest-1ug-01	915	912	11.8	0.89968	436.46	168000	2560500	0	-5.3024	1	11.63	43.32	43.32	128.2	121.8	2.794	0	2.794	0	0	0.01323	0	0	NaN	NaN	NaN	NaN
20140904-PurClathDigest-1ug-01	916	913	11.815	0.71005	253	265210	3534700	0	-5.3024	1	11.58	43.1	43.1	128.8	122.3	2.815	0	2.815	0	0	0.01402	0	0	NaN	NaN	NaN	NaN
20140904-PurClathDigest-1ug-01	917	914	11.827	0.87999	422.54	212460	2668100	0	-5.3024	1	11.55	42.93	42.93	129.3	122.7	2.832	0	2.832	0	0	0.01465	0	0	NaN	NaN	NaN	NaN
20140904-PurClathDigest-1ug-01	918	915	11.842	0.8301	374.29	242220	2964300	0	-5.3024	1	11.5	42.71	42.71	129.8	123.2	2.853	0	2.853	0	0	0.01543	0	0	NaN	NaN	NaN	NaN
20140904-PurClathDigest-1ug-01	919	916	11.855	0.8499	394.96	264600	2868000	0	-5.3024	1	11.46	42.48	42.48	130.4	123.8	2.876	0	2.876	0	0	0.01602	0	0	NaN	NaN	NaN	NaN
20140904-PurClathDigest-1ug-01	920	917	11.87	0.86998	407.9	244330	2841900	0	-5.3024	1	11.4	42.18	42.18	131.1	124.4	2.904	0	2.904	0	0	0.01639	0	0	NaN	NaN	NaN	NaN
20140904-PurClathDigest-1ug-01	921	918	11.884	0.89001	433.55	182670	2636200	0	-5.3024	1	11.34	41.88	41.88	131.9	125.1	2.934	0	2.934	0	0	0.01677	0	0	NaN	NaN	NaN	NaN
20140904-PurClathDigest-1ug-01	922	919	11.899	0.87009	410.93	201070	2698700	0	-5.3024	1	11.28	41.57	41.57	132.7	125.8	2.963	0	2.963	0	0	0.01717	0	0	NaN	NaN	NaN	NaN
20140904-PurClathDigest-1ug-01	923	920	11.913	0.74003	270.68	230260	3332400	0	-5.3024	1	11.22	41.27	41.27	133.4	126.5	2.993	0	2.993	0	0	0.01755	0	0	NaN	NaN	NaN	NaN
20140904-PurClathDigest-1ug-01	924	921	11.926	0.86998	415.47	197090	2707900	0	-5.3024	1	11.17	41.01	41.01	134	127.1	3.017	0	3.017	0	0	0.01788	0	0	NaN	NaN	NaN	NaN
20140904-PurClathDigest-1ug-01	925	922	11.94	0.77042	282.3	269830	3398700	0	-5.3024	1	11.11	40.71	40.71	134.8	127.8	3.046	0	3.046	0	0	0.01826	0	0	NaN	NaN	NaN	NaN
20140904-PurClathDigest-1ug-01	926	923	11.953	0.88955	426.86	206790	2700500	0	-5.3024	1	11.06	40.44	40.44	135.4	128.4	3.072	0	3.072	0	0	0.0186	0	0	NaN	NaN	NaN	NaN
20140904-PurClathDigest-1ug-01	927	924	11.968	0.91015	446.95	187670	2568300	0	-5.3024	1	10.99	40.14	40.14	136.2	129.1	3.102	0	3.102	0	0	0.01899	0	0	NaN	NaN	NaN	NaN
20140904-PurClathDigest-1ug-01	928	925	11.983	0.90008	444.07	200590	2583200	0	-5.3024	1	10.93	39.82	39.82	137	129.8	3.133	0	3.133	0	0	0.01939	0	0	NaN	NaN	NaN	NaN
20140904-PurClathDigest-1ug-01	929	926	11.998	0.8198	352.79	212040	2949300	0	-5.3024	1	10.87	39.51	39.51	137.8	130.5	3.163	0	3.163	0	0	0.01979	0	0	NaN	NaN	NaN	NaN
20140904-PurClathDigest-1ug-01	930	927	12.012	0.90992	448.57	175530	2527600	0	-5.3024	1	10.81	39.22	39.22	138.5	131.1	3.19	0	3.19	0	0	0.02015	0	0	NaN	NaN	NaN	NaN
20140904-PurClathDigest-1ug-01	931	928	12.027	0.85997	398.52	202800	2768700	0	-5.3024	1	10.75	38.91	38.91	139.2	131.9	3.221	0	3.221	0	0	0.02055	0	0	NaN	NaN	NaN	NaN
20140904-PurClathDigest-1ug-01	932	929	12.041	0.76984	302.38	220720	3147600	0	-5.3024	1	10.69	38.61	38.61	140	132.5	3.25	0	3.25	0	0	0.02093	0	0	NaN	NaN	NaN	NaN
20140904-PurClathDigest-1ug-01	933	930	12.054	0.82026	364.79	243660	2979100	0	-5.3024	1	10.64	38.34	38.34	140.6	133.1	3.275	0	3.275	0	0	0.02127	0	0	NaN	NaN	NaN	NaN
20140904-PurClathDigest-1ug-01	934	931	12.068	0.8301	368.48	217220	2977700	0	-5.3024	1	10.59	38.06	38.06	141.3	133.8	3.303	0	3.303	0	0	0.02163	0	0	NaN	NaN	NaN	NaN
20140904-PurClathDigest-1ug-01	935	932	12.082	0.76984	308.12	347410	3336500	0	-5.3024	1	10.53	37.77	37.77	142.1	134.4	3.331	0	3.331	0	0	0.022	0	0	NaN	NaN	NaN	NaN
20140904-PurClathDigest-1ug-01	936	933	12.094	0.81007	352.94	231670	3043000	0	-5.3024	1	10.48	37.5	37.5	142.7	135.1	3.356	0	3.356	0	0	0.02234	0	0	NaN	NaN	NaN	NaN
20140904-PurClathDigest-1ug-01	937	934	12.108	0.88989	421.77	195750	2692600	0	-5.3024	1	10.42	37.22	37.22	143.4	135.7	3.384	0	3.384	0	0	0.0227	0	0	NaN	NaN	NaN	NaN
20140904-PurClathDigest-1ug-01	938	935	12.123	0.7901	331.74	250660	3125300	0	-5.3024	1	10.36	36.91	36.91	144.2	136.4	3.413	0	3.413	0	0	0.02309	0	0	NaN	NaN	NaN	NaN
20140904-PurClathDigest-1ug-01	939	936	12.136	0.8202	356.27	236490	3013900	0	-5.3024	1	10.31	36.64	36.64	144.8	137	3.44	0	3.44	0	0	0.02344	0	0	NaN	NaN	NaN	NaN
20140904-PurClathDigest-1ug-01	940	937	12.15	0.82003	364.31	277490	3021200	0	-5.3024	1	10.25	36.36	36.36	145.5	137.7	3.467	0	3.467	0	0	0.0238	0	0	NaN	NaN	NaN	NaN
20140904-PurClathDigest-1ug-01	941	938	12.163	0.7897	331.28	282890	3565200	0	-5.3024	1	10.2	36.18	36.18	146.4	138.5	3.459	0	3.459	0	0	0.02416	0	0	NaN	NaN	NaN	NaN
20140904-PurClathDigest-1ug-01	942	939	12.176	0.82998	346.59	297780	3219400	0	-5.3024	1	10.16	36.01	36.01	147.2	139.4	3.45	0	3.45	0	0	0.02451	0	0	NaN	NaN	NaN	NaN
20140904-PurClathDigest-1ug-01	943	940	12.19	0.81081	351.25	243240	3111600	0	-5.3024	1	10.11	35.83	35.83	148.1	140.3	3.441	0	3.441	0	0	0.02487	0	0	NaN	NaN	NaN	NaN
20140904-PurClathDigest-1ug-01	944	941	12.204	0.81928	361.49	245560	2980500	0	-5.3024	1	10.06	35.66	35.66	148.9	141.1	3.431	0	3.431	0	0	0.02523	0	0	NaN	NaN	NaN	NaN
20140904-PurClathDigest-1ug-01	945	942	12.217	0.68001	225.03	298060	3855600	0	-5.3024	1	10.01	35.48	35.48	149.8	142	3.422	0	3.422	0	0	0.02559	0	0	NaN	NaN	NaN	NaN
20140904-PurClathDigest-1ug-01	946	943	12.229	0.85991	396.71	204330	2789600	0	-5.3024	1	9.972	35.34	35.34	150.5	142.7	3.414	0	3.414	0	0	0.02589	0	0	NaN	NaN	NaN	NaN
20140904-PurClathDigest-1ug-01	947	944	12.243	0.77002	290.79	282110	3426300	0	-5.3024	1	9.922	35.15	35.15	151.4	143.6	3.404	0	3.404	0	0	0.02627	0	0	NaN	NaN	NaN	NaN
20140904-PurClathDigest-1ug-01	948	945	12.256	0.86008	404.85	209670	2764300	0	-5.3024	1	9.877	34.99	34.99	152.2	144.5	3.395	0	3.395	0	0	0.02661	0	0	NaN	NaN	NaN	NaN
20140904-PurClathDigest-1ug-01	949	946	12.27	0.85001	393.65	183360	2780200	0	-5.3024	1	9.827	34.8	34.8	153.1	145.4	3.386	0	3.386	0	0	0.02699	0	0	NaN	NaN	NaN	NaN
20140904-PurClathDigest-1ug-01	950	947	12.284	0.87021	404.5	218580	2778400	0	-5.3024	1	9.778	34.62	34.62	154	146.3	3.376	0	3.376	0	0	0.02736	0	0	NaN	NaN	NaN	NaN
20140904-PurClathDigest-1ug-01	951	948	12.299	0.87965	416.51	205130	2716100	0	-5.3024	1	9.727	34.43	34.43	154.9	147.2	3.366	0	3.366	0	0	0.02775	0	0	NaN	NaN	NaN	NaN
20140904-PurClathDigest-1ug-01	952	949	12.314	0.77002	306.22	216870	3196900	0	-5.3024	1	9.676	34.25	34.25	155.8	148.2	3.356	0	3.356	0	0	0.02814	0	0	NaN	NaN	NaN	NaN
20140904-PurClathDigest-1ug-01	953	950	12.326	0.87004	411.3	255500	2779000	0	-5.3024	1	9.631	34.08	34.08	156.6	149	3.347	0	3.347	0	0	0.02848	0	0	NaN	NaN	NaN	NaN
20140904-PurClathDigest-1ug-01	954	951	12.341	0.89006	407.42	217620	2748700	0	-5.3024	1	9.58	33.89	33.89	157.5	149.9	3.337	0	3.337	0	0	0.02886	0	0	NaN	NaN	NaN	NaN
20140904-PurClathDigest-1ug-01	955	952	12.356	0.83073	368.44	254040	3018400	0	-5.3024	1	9.528	33.7	33.7	158.4	150.9	3.327	0	3.327	0	0	0.02925	0	0	NaN	NaN	NaN	NaN
20140904-PurClathDigest-1ug-01	956	953	12.37	0.76916	311.59	252180	3299500	0	-5.3024	1	9.48	33.53	33.53	159.3	151.7	3.317	0	3.317	0	0	0.02962	0	0	NaN	NaN	NaN	NaN
20140904-PurClathDigest-1ug-01	957	954	12.382	0.83004	368.34	185240	3107100	0	-5.3024	1	9.435	33.36	33.36	160.1	152.6	3.308	0	3.308	0	0	0.02996	0	0	NaN	NaN	NaN	NaN
20140904-PurClathDigest-1ug-01	958	955	12.396	0.61998	162.15	310850	4326300	0	-5.3024	1	9.386	33.18	33.18	161	153.5	3.299	0	3.299	0	0	0.03032	0	0	NaN	NaN	NaN	NaN
20140904-PurClathDigest-1ug-01	959	956	12.407	0.85012	389.58	222400	2847400	0	-5.3024	1	9.35	33.05	33.05	161.6	154.1	3.292	0	3.292	0	0	0.0306	0	0	NaN	NaN	NaN	NaN
20140904-PurClathDigest-1ug-01	960	957	12.421	0.87999	425.25	184790	2671300	0	-5.3024	1	9.301	32.87	32.87	162.5	155	3.282	0	3.282	0	0	0.03097	0	0	NaN	NaN	NaN	NaN
20140904-PurClathDigest-1ug-01	961	958	12.435	0.76996	309.41	237110	3302300	0	-5.3024	1	9.249	32.68	32.68	163.4	156	3.272	0	3.272	0	0	0.03136	0	0	NaN	NaN	NaN	NaN
20140904-PurClathDigest-1ug-01	962	959	12.448	0.88005	419.08	140790	3043400	0	-5.3024	1	9.204	32.52	32.52	164.2	156.8	3.263	0	3.263	0	0	0.0317	0	0	NaN	NaN	NaN	NaN
20140904-PurClathDigest-1ug-01	963	960	12.463	0.60986	141.43	262980	6246800	0	-5.3024	1	9.174	32.29	32.29	165.1	157.6	3.265	0	3.265	0	0	0.03175	0	0	NaN	NaN	NaN	NaN
20140904-PurClathDigest-1ug-01	964	961	12.473	0.60001	143.45	260940	5647700	0	-5.3024	1	9.154	32.13	32.13	165.6	158.2	3.268	0	3.268	0	0	0.03175	0	0	NaN	NaN	NaN	NaN
20140904-PurClathDigest-1ug-01	965	962	12.483	0.83033	370.63	231340	2936500	0	-5.3024	1	9.135	31.97	31.97	166.2	158.7	3.271	0	3.271	0	0	0.03175	0	0	NaN	NaN	NaN	NaN
20140904-PurClathDigest-1ug-01	966	963	12.497	0.8198	359.71	200110	2989300	0	-5.3024	1	9.108	31.75	31.75	167	159.5	3.274	0	3.274	0	0	0.03175	0	0	NaN	NaN	NaN	NaN
20140904-PurClathDigest-1ug-01	967	964	12.511	0.85991	404.83	199890	2774000	0	-5.3024	1	9.082	31.54	31.54	167.7	160.2	3.278	0	3.278	0	0	0.03175	0	0	NaN	NaN	NaN	NaN
20140904-PurClathDigest-1ug-01	968	965	12.525	0.76017	300.56	255970	3433900	0	-5.3024	1	9.055	31.31	31.31	168.5	161	3.282	0	3.282	0	0	0.03175	0	0	NaN	NaN	NaN	NaN
20140904-PurClathDigest-1ug-01	969	966	12.538	0.79988	341.26	233090	3160200	0	-5.3024	1	9.03	31.11	31.11	169.2	161.7	3.285	0	3.285	0	0	0.03175	0	0	NaN	NaN	NaN	NaN
20140904-PurClathDigest-1ug-01	970	967	12.551	0.78003	320.28	220900	3266800	0	-5.3024	1	9.005	30.9	30.9	170	162.5	3.289	0	3.289	0	0	0.03175	0	0	NaN	NaN	NaN	NaN
20140904-PurClathDigest-1ug-01	971	968	12.564	0.78999	330.01	240360	3199300	0	-5.3024	1	8.98	30.7	30.7	170.7	163.2	3.292	0	3.292	0	0	0.03175	0	0	NaN	NaN	NaN	NaN
20140904-PurClathDigest-1ug-01	972	969	12.577	0.89001	427.78	240380	2864200	0	-5.3024	1	8.955	30.49	30.49	171.4	163.9	3.296	0	3.296	0	0	0.03175	0	0	NaN	NaN	NaN	NaN
20140904-PurClathDigest-1ug-01	973	970	12.592	1.3204	300.1	289530	3464700	1	-5.3024	1	8.926	30.26	30.26	172.3	164.7	3.299	0	3.299	0	0	0.03175	0	0	NaN	NaN	NaN	NaN
20140904-PurClathDigest-1ug-01	975	971	12.614	1.46	443.28	193780	2854000	1	-5.3024	1	8.884	29.91	29.91	173.5	166	3.305	0	3.305	0	0	0.03175	0	0	NaN	NaN	NaN	NaN
20140904-PurClathDigest-1ug-01	977	972	12.638	0.78959	319.07	249970	3237600	0	-5.3024	1	8.838	29.53	29.53	174.8	167.3	3.312	0	3.312	0	0	0.03175	0	0	NaN	NaN	NaN	NaN
20140904-PurClathDigest-1ug-01	978	973	12.651	0.76	296.21	236220	3382500	0	-5.3024	1	8.812	29.32	29.32	175.6	168	3.315	0	3.315	0	0	0.03175	0	0	NaN	NaN	NaN	NaN
20140904-PurClathDigest-1ug-01	979	974	12.664	0.86992	407.98	205990	2790400	0	-5.3024	1	8.788	29.12	29.12	176.3	168.7	3.319	0	3.319	0	0	0.03175	0	0	NaN	NaN	NaN	NaN
20140904-PurClathDigest-1ug-01	980	975	12.679	0.7501	282.81	249860	3504300	0	-5.3024	1	8.76	28.89	28.89	177.1	169.5	3.322	0	3.322	0	0	0.03175	0	0	NaN	NaN	NaN	NaN
20140904-PurClathDigest-1ug-01	981	976	12.691	0.84	382.83	212300	2963500	0	-5.3024	1	8.736	28.7	28.7	177.8	170.2	3.326	0	3.326	0	0	0.03175	0	0	NaN	NaN	NaN	NaN
20140904-PurClathDigest-1ug-01	982	977	12.705	0.84	384.18	213070	2898700	0	-5.3024	1	8.71	28.48	28.48	178.6	171	3.329	0	3.329	0	0	0.03175	0	0	NaN	NaN	NaN	NaN
20140904-PurClathDigest-1ug-01	983	978	12.719	0.61987	157.41	384400	4276700	0	-5.3024	1	8.683	28.26	28.26	179.3	171.8	3.333	0	3.333	0	0	0.03175	0	0	NaN	NaN	NaN	NaN
20140904-PurClathDigest-1ug-01	984	979	12.729	0.87004	414.48	190460	2760800	0	-5.3024	1	8.663	28.09	28.09	179.9	172.3	3.336	0	3.336	0	0	0.03175	0	0	NaN	NaN	NaN	NaN
20140904-PurClathDigest-1ug-01	985	980	12.744	0.89029	432.12	173580	2566400	0	-5.3024	1	8.635	27.87	27.87	180.7	173.1	3.34	0	3.34	0	0	0.03175	0	0	NaN	NaN	NaN	NaN
20140904-PurClathDigest-1ug-01	986	981	12.759	0.6197	153.77	247030	5574600	0	-5.3024	1	8.609	27.74	27.74	181.6	174	3.335	0	3.335	0	0	0.03175	0	0	NaN	NaN	NaN	NaN
20140904-PurClathDigest-1ug-01	987	982	12.769	0.88011	424.88	195200	2651800	0	-5.3024	1	8.592	27.71	27.71	182.1	174.6	3.328	0	3.328	0	0	0.03175	0	0	NaN	NaN	NaN	NaN
20140904-PurClathDigest-1ug-01	988	983	12.784	0.89991	443.84	150260	2455900	0	-5.3024	1	8.568	27.66	27.66	183	175.4	3.317	0	3.317	0	0	0.03175	0	0	NaN	NaN	NaN	NaN
20140904-PurClathDigest-1ug-01	989	984	12.799	0.61008	143.57	262190	5211300	0	-5.3024	1	8.543	27.62	27.62	183.8	176.3	3.306	0	3.306	0	0	0.03175	0	0	NaN	NaN	NaN	NaN
20140904-PurClathDigest-1ug-01	990	985	12.809	0.86987	407.14	202040	2785900	0	-5.3024	1	8.526	27.59	27.59	184.4	176.9	3.299	0	3.299	0	0	0.03175	0	0	NaN	NaN	NaN	NaN
20140904-PurClathDigest-1ug-01	991	986	12.823	0.82014	358.92	221280	3038800	0	-5.3024	1	8.502	27.54	27.54	185.2	177.7	3.289	0	3.289	0	0	0.03175	0	0	NaN	NaN	NaN	NaN
20140904-PurClathDigest-1ug-01	992	987	12.837	0.60997	142.9	259300	6122200	0	-5.3024	1	8.479	27.5	27.5	186	178.5	3.279	0	3.279	0	0	0.03175	0	0	NaN	NaN	NaN	NaN
20140904-PurClathDigest-1ug-01	993	988	12.847	0.61003	148.05	252750	5912500	0	-5.3024	1	8.463	27.47	27.47	186.5	179.1	3.272	0	3.272	0	0	0.03175	0	0	NaN	NaN	NaN	NaN
20140904-PurClathDigest-1ug-01	994	989	12.857	0.5999	139.43	264460	6095100	0	-5.3024	1	8.446	27.43	27.43	187.1	179.7	3.265	0	3.265	0	0	0.03175	0	0	NaN	NaN	NaN	NaN
20140904-PurClathDigest-1ug-01	995	990	12.867	0.66999	209.94	324940	4279700	0	-5.3024	1	8.429	27.4	27.4	187.7	180.3	3.257	0	3.257	0	0	0.03175	0	0	NaN	NaN	NaN	NaN
20140904-PurClathDigest-1ug-01	996	991	12.879	0.78999	327.8	236320	3168500	0	-5.3024	1	8.411	27.37	27.37	188.3	180.9	3.249	0	3.249	0	0	0.03175	0	0	NaN	NaN	NaN	NaN
20140904-PurClathDigest-1ug-01	997	992	12.892	0.86014	402.03	189350	2891400	0	-5.3024	1	8.389	27.33	27.33	189	181.7	3.24	0	3.24	0	0	0.03175	0	0	NaN	NaN	NaN	NaN
20140904-PurClathDigest-1ug-01	998	993	12.906	0.74987	293.03	197710	3828300	0	-5.3024	1	8.365	27.28	27.28	189.8	182.5	3.23	0	3.23	0	0	0.03175	0	0	NaN	NaN	NaN	NaN
20140904-PurClathDigest-1ug-01	999	994	12.919	0.60997	149.6	244050	5908400	0	-5.3024	1	8.344	27.24	27.24	190.5	183.2	3.221	0	3.221	0	0	0.03175	0	0	NaN	NaN	NaN	NaN
20140904-PurClathDigest-1ug-01	1000	995	12.929	0.83015	367.18	222660	2990500	0	-5.3024	1	8.328	27.21	27.21	191.1	183.8	3.214	0	3.214	0	0	0.03175	0	0	NaN	NaN	NaN	NaN
20140904-PurClathDigest-1ug-01	1001	996	12.943	0.8499	366.81	159120	3361700	0	-5.3024	1	8.305	27.17	27.17	191.9	184.6	3.204	0	3.204	0	0	0.03175	0	0	NaN	NaN	NaN	NaN
20140904-PurClathDigest-1ug-01	1002	997	12.957	0.91026	447.05	180080	2632600	0	-5.3024	1	8.281	27.12	27.12	192.7	185.5	3.194	0	3.194	0	0	0.03175	0	0	NaN	NaN	NaN	NaN
20140904-PurClathDigest-1ug-01	1003	998	12.972	0.79983	343	246350	3026600	0	-5.3024	1	8.256	27.08	27.08	193.5	186.3	3.183	0	3.183	0	0	0.03175	0	0	NaN	NaN	NaN	NaN
20140904-PurClathDigest-1ug-01	1004	999	12.985	0.8008	336.38	291960	3307900	0	-5.3024	1	8.234	27.04	27.04	194.3	187.1	3.173	0	3.173	0	0	0.03175	0	0	NaN	NaN	NaN	NaN
20140904-PurClathDigest-1ug-01	1005	1000	12.999	0.60917	148.94	338970	4995600	0	-5.3024	1	8.212	26.99	26.99	195	187.9	3.164	0	3.164	0	0	0.03175	0	0	NaN	NaN	NaN	NaN
20140904-PurClathDigest-1ug-01	1006	1001	13.009	0.86992	398.44	201060	2794000	0	-5.3024	1	8.195	26.96	26.96	195.6	188.5	3.156	0	3.156	0	0	0.03175	0	0	NaN	NaN	NaN	NaN
20140904-PurClathDigest-1ug-01	1007	1002	13.023	0.61008	147.27	266510	5641000	0	-5.3024	1	8.171	26.92	26.92	196.4	189.3	3.146	0	3.146	0	0	0.03175	0	0	NaN	NaN	NaN	NaN
20140904-PurClathDigest-1ug-01	1008	1003	13.033	0.62988	167.2	233090	5206100	0	-5.3024	1	8.154	26.88	26.88	197	189.9	3.139	0	3.139	0	0	0.03175	0	0	NaN	NaN	NaN	NaN
20140904-PurClathDigest-1ug-01	1009	1004	13.044	0.60013	141.27	249750	5900400	0	-5.3024	1	8.137	26.85	26.85	197.6	190.5	3.131	0	3.131	0	0	0.03175	0	0	NaN	NaN	NaN	NaN
20140904-PurClathDigest-1ug-01	1010	1005	13.054	0.61003	153.52	217120	5519000	0	-5.3024	1	8.12	26.8	26.8	198.1	191.1	3.125	0	3.125	0	0	0.03175	0	0	NaN	NaN	NaN	NaN
20140904-PurClathDigest-1ug-01	1011	1006	13.064	0.59996	145.3	232020	5254100	0	-5.3024	1	8.101	26.7	26.7	198.7	191.6	3.12	0	3.12	0	0	0.03175	0	0	NaN	NaN	NaN	NaN
20140904-PurClathDigest-1ug-01	1012	1007	13.074	0.61993	159.74	217060	5255200	0	-5.3024	1	8.083	26.61	26.61	199.2	192.2	3.114	0	3.114	0	0	0.03175	0	0	NaN	NaN	NaN	NaN
20140904-PurClathDigest-1ug-01	1013	1008	13.084	0.86998	407.38	229180	2721600	0	-5.3024	1	8.064	26.51	26.51	199.8	192.8	3.109	0	3.109	0	0	0.03175	0	0	NaN	NaN	NaN	NaN
20140904-PurClathDigest-1ug-01	1014	1009	13.099	0.88011	425.28	149130	2819700	0	-5.3024	1	8.037	26.38	26.38	200.6	193.6	3.101	0	3.101	0	0	0.03175	0	0	NaN	NaN	NaN	NaN
20140904-PurClathDigest-1ug-01	1015	1010	13.114	0.60001	131.37	395760	4873900	0	-5.3024	1	8.01	26.24	26.24	201.4	194.4	3.093	0	3.093	0	0	0.03175	0	0	NaN	NaN	NaN	NaN
20140904-PurClathDigest-1ug-01	1016	1011	13.124	0.60001	144.04	258980	5879400	0	-5.3024	1	7.992	26.15	26.15	201.9	195	3.088	0	3.088	0	0	0.03175	0	0	NaN	NaN	NaN	NaN
20140904-PurClathDigest-1ug-01	1017	1012	13.134	0.88989	430.27	149850	2843800	0	-5.3024	1	7.973	26.05	26.05	202.5	195.5	3.083	0	3.083	0	0	0.03175	0	0	NaN	NaN	NaN	NaN
20140904-PurClathDigest-1ug-01	1018	1013	13.148	0.60997	144.92	275880	6158900	0	-5.3024	1	7.946	25.91	25.91	203.3	196.4	3.075	0	3.075	0	0	0.03175	0	0	NaN	NaN	NaN	NaN
20140904-PurClathDigest-1ug-01	1019	1014	13.159	0.90014	436.36	208020	2722700	0	-5.3024	1	7.928	25.82	25.82	203.8	196.9	3.07	0	3.07	0	0	0.03175	0	0	NaN	NaN	NaN	NaN
20140904-PurClathDigest-1ug-01	1020	1015	13.174	0.66988	212.82	300620	4206400	0	-5.3024	1	7.9	25.68	25.68	204.7	197.8	3.062	0	3.062	0	0	0.03175	0	0	NaN	NaN	NaN	NaN
20140904-PurClathDigest-1ug-01	1021	1016	13.185	1.8205	347.95	313560	3601300	2	-5.3024	1	7.88	25.58	25.58	205.3	198.4	3.056	0	3.056	0	0	0.03175	0	0	NaN	NaN	NaN	NaN
20140904-PurClathDigest-1ug-01	1024	1017	13.215	0.95953	500	119050	2511500	0	-5.3024	1	7.824	25.29	25.29	206.9	200.1	3.04	0	3.04	0	0	0.03175	0	0	NaN	NaN	NaN	NaN
20140904-PurClathDigest-1ug-01	1025	1018	13.231	0.63	168.1	218430	5213100	0	-5.3024	1	7.795	25.14	25.14	207.8	201	3.031	0	3.031	0	0	0.03175	0	0	NaN	NaN	NaN	NaN
20140904-PurClathDigest-1ug-01	1026	1019	13.242	0.96027	500	129280	2567000	0	-5.3024	1	7.775	25.05	25.05	208.4	201.6	3.026	0	3.026	0	0	0.03175	0	0	NaN	NaN	NaN	NaN
20140904-PurClathDigest-1ug-01	1027	1020	13.258	0.60974	153.97	242020	5287800	0	-5.3024	1	7.746	24.9	24.9	209.2	202.5	3.017	0	3.017	0	0	0.03175	0	0	NaN	NaN	NaN	NaN
20140904-PurClathDigest-1ug-01	1028	1021	13.268	0.61008	152.8	229800	5465400	0	-5.3024	1	7.727	24.8	24.8	209.8	203.1	3.012	0	3.012	0	0	0.03175	0	0	NaN	NaN	NaN	NaN
20140904-PurClathDigest-1ug-01	1029	1022	13.278	0.61003	149.39	226790	5576400	0	-5.3024	1	7.709	24.71	24.71	210.4	203.6	3.006	0	3.006	0	0	0.03175	0	0	NaN	NaN	NaN	NaN
20140904-PurClathDigest-1ug-01	1030	1023	13.288	0.5999	140.48	255360	5967600	0	-5.3024	1	7.69	24.61	24.61	210.9	204.2	3.001	0	3.001	0	0	0.03175	0	0	NaN	NaN	NaN	NaN
20140904-PurClathDigest-1ug-01	1031	1024	13.298	0.59996	142.55	224170	5482400	0	-5.3024	1	7.672	24.52	24.52	211.5	204.8	2.996	0	2.996	0	0	0.03175	0	0	NaN	NaN	NaN	NaN
20140904-PurClathDigest-1ug-01	1032	1025	13.308	0.65002	184.57	210560	4851100	0	-5.3024	1	7.653	24.42	24.42	212	205.3	2.99	0	2.99	0	0	0.03175	0	0	NaN	NaN	NaN	NaN
20140904-PurClathDigest-1ug-01	1033	1026	13.319	0.61008	147.56	244890	5686500	0	-5.3024	1	7.633	24.32	24.32	212.6	205.9	2.985	0	2.985	0	0	0.03175	0	0	NaN	NaN	NaN	NaN
20140904-PurClathDigest-1ug-01	1034	1027	13.329	0.60001	137.43	261890	5896300	0	-5.3024	1	7.615	24.23	24.23	213.2	206.5	2.979	0	2.979	0	0	0.03175	0	0	NaN	NaN	NaN	NaN
20140904-PurClathDigest-1ug-01	1035	1028	13.339	0.64001	171.66	220570	5174200	0	-5.3024	1	7.596	24.14	24.14	213.7	207.1	2.974	0	2.974	0	0	0.03175	0	0	NaN	NaN	NaN	NaN
20140904-PurClathDigest-1ug-01	1036	1029	13.35	0.95987	500	126350	2549000	0	-5.3024	1	7.577	24.04	24.04	214.3	207.7	2.968	0	2.968	0	0	0.03175	0	0	NaN	NaN	NaN	NaN
20140904-PurClathDigest-1ug-01	1037	1030	13.366	0.61998	158.17	265230	5275900	0	-5.3024	1	7.573	24.2	24.2	214.9	208.3	2.962	0	2.962	0	0	0.03175	0	0	NaN	NaN	NaN	NaN
20140904-PurClathDigest-1ug-01	1038	1031	13.376	0.62004	156.73	223600	5280200	0	-5.3024	1	7.571	24.32	24.32	215.3	208.7	2.959	0	2.959	0	0	0.03175	0	0	NaN	NaN	NaN	NaN
20140904-PurClathDigest-1ug-01	1039	1032	13.386	0.61008	148.63	240260	5691400	0	-5.3024	1	7.569	24.43	24.43	215.6	209.1	2.955	0	2.955	0	0	0.03175	0	0	NaN	NaN	NaN	NaN
20140904-PurClathDigest-1ug-01	1040	1033	13.397	0.62021	156.68	227410	5449600	0	-5.3024	1	7.568	24.54	24.54	216	209.5	2.951	0	2.951	0	0	0.03175	0	0	NaN	NaN	NaN	NaN
20140904-PurClathDigest-1ug-01	1041	1034	13.407	0.6098	153.06	259020	5680200	0	-5.3024	1	7.566	24.65	24.65	216.4	209.8	2.947	0	2.947	0	0	0.03175	0	0	NaN	NaN	NaN	NaN
20140904-PurClathDigest-1ug-01	1042	1035	13.417	0.61998	160.6	232040	5391400	0	-5.3024	1	7.564	24.76	24.76	216.8	210.2	2.943	0	2.943	0	0	0.03175	0	0	NaN	NaN	NaN	NaN
20140904-PurClathDigest-1ug-01	1043	1036	13.427	0.60001	140.03	290320	5164600	0	-5.3024	1	7.562	24.87	24.87	217.1	210.6	2.94	0	2.94	0	0	0.03175	0	0	NaN	NaN	NaN	NaN
20140904-PurClathDigest-1ug-01	1044	1037	13.437	0.62988	166.28	248960	5435100	0	-5.3024	1	7.56	24.98	24.98	217.5	211	2.936	0	2.936	0	0	0.03175	0	0	NaN	NaN	NaN	NaN
20140904-PurClathDigest-1ug-01	1045	1038	13.448	0.64001	177.16	221550	5018100	0	-5.3024	1	7.558	25.1	25.1	217.9	211.4	2.932	0	2.932	0	0	0.03175	0	0	NaN	NaN	NaN	NaN
20140904-PurClathDigest-1ug-01	1046	1039	13.459	0.6201	157.27	238390	5438400	0	-5.3024	1	7.556	25.21	25.21	218.3	211.8	2.928	0	2.928	0	0	0.03175	0	0	NaN	NaN	NaN	NaN
20140904-PurClathDigest-1ug-01	1047	1040	13.469	0.61998	158.02	239820	5382300	0	-5.3024	1	7.554	25.32	25.32	218.7	212.2	2.924	0	2.924	0	0	0.03175	0	0	NaN	NaN	NaN	NaN
20140904-PurClathDigest-1ug-01	1048	1041	13.479	0.62994	151.95	218700	5240800	0	-5.3024	1	7.552	25.44	25.44	219	212.6	2.92	0	2.92	0	0	0.03175	0	0	NaN	NaN	NaN	NaN
20140904-PurClathDigest-1ug-01	1049	1042	13.49	0.60007	138.88	283470	6045900	0	-5.3024	1	7.55	25.55	25.55	219.4	213	2.917	0	2.917	0	0	0.03175	0	0	NaN	NaN	NaN	NaN
20140904-PurClathDigest-1ug-01	1050	1043	13.5	0.61993	162.9	255720	5594400	0	-5.3024	1	7.548	25.66	25.66	219.8	213.4	2.913	0	2.913	0	0	0.03175	0	0	NaN	NaN	NaN	NaN
20140904-PurClathDigest-1ug-01	1051	1044	13.51	0.61008	146.66	234260	5621800	0	-5.3024	1	7.546	25.77	25.77	220.2	213.8	2.909	0	2.909	0	0	0.03175	0	0	NaN	NaN	NaN	NaN
20140904-PurClathDigest-1ug-01	1052	1045	13.52	0.60997	147.06	265920	5887500	0	-5.3024	1	7.545	25.88	25.88	220.6	214.2	2.905	0	2.905	0	0	0.03175	0	0	NaN	NaN	NaN	NaN
20140904-PurClathDigest-1ug-01	1053	1046	13.53	0.62004	158.64	226120	5358500	0	-5.3024	1	7.543	25.99	25.99	220.9	214.5	2.901	0	2.901	0	0	0.03175	0	0	NaN	NaN	NaN	NaN
20140904-PurClathDigest-1ug-01	1054	1047	13.541	0.60991	153.4	241890	5476500	0	-5.3024	1	7.541	26.1	26.1	221.3	214.9	2.898	0	2.898	0	0	0.03175	0	0	NaN	NaN	NaN	NaN
20140904-PurClathDigest-1ug-01	1055	1048	13.551	0.61008	152.55	241660	5711500	0	-5.3024	1	7.539	26.21	26.21	221.7	215.3	2.894	0	2.894	0	0	0.03175	0	0	NaN	NaN	NaN	NaN
20140904-PurClathDigest-1ug-01	1056	1049	13.561	0.62988	163.87	250110	5146300	0	-5.3024	1	7.537	26.32	26.32	222.1	215.7	2.89	0	2.89	0	0	0.03175	0	0	NaN	NaN	NaN	NaN
20140904-PurClathDigest-1ug-01	1057	1050	13.572	0.60013	135.63	245780	5736700	0	-5.3024	1	7.535	26.44	26.44	222.4	216.1	2.886	0	2.886	0	0	0.03175	0	0	NaN	NaN	NaN	NaN
20140904-PurClathDigest-1ug-01	1058	1051	13.582	0.6399	176.34	220360	5202300	0	-5.3024	1	7.533	26.55	26.55	222.8	216.5	2.882	0	2.882	0	0	0.03175	0	0	NaN	NaN	NaN	NaN
20140904-PurClathDigest-1ug-01	1059	1052	13.592	0.60997	148.44	270800	5309200	0	-5.3024	1	7.531	26.66	26.66	223.2	216.9	2.879	0	2.879	0	0	0.03175	0	0	NaN	NaN	NaN	NaN
20140904-PurClathDigest-1ug-01	1060	1053	13.602	0.6201	154.04	229470	5446500	0	-5.3024	1	7.529	26.77	26.77	223.6	217.3	2.875	0	2.875	0	0	0.03175	0	0	NaN	NaN	NaN	NaN
20140904-PurClathDigest-1ug-01	1061	1054	13.613	0.61003	146.57	233450	5647800	0	-5.3024	1	7.527	26.88	26.88	224	217.7	2.871	0	2.871	0	0	0.03175	0	0	NaN	NaN	NaN	NaN
20140904-PurClathDigest-1ug-01	1062	1055	13.623	0.6102	147.3	228040	5323100	0	-5.3024	1	7.526	26.99	26.99	224.3	218.1	2.867	0	2.867	0	0	0.03175	0	0	NaN	NaN	NaN	NaN
20140904-PurClathDigest-1ug-01	1063	1056	13.633	0.58971	133.28	270540	6152400	0	-5.3024	1	7.524	27.1	27.1	224.7	218.4	2.863	0	2.863	0	0	0.03175	0	0	NaN	NaN	NaN	NaN
20140904-PurClathDigest-1ug-01	1064	1057	13.643	0.63995	177.95	209600	5154400	0	-5.3024	1	7.522	27.21	27.21	225.1	218.8	2.86	0	2.86	0	0	0.03175	0	0	NaN	NaN	NaN	NaN
20140904-PurClathDigest-1ug-01	1065	1058	13.654	0.61014	146.26	267120	5728800	0	-5.3024	1	7.521	27.29	27.29	225.4	219.2	2.851	0	2.851	0	0	0.03156	0	0	NaN	NaN	NaN	NaN
20140904-PurClathDigest-1ug-01	1066	1059	13.664	0.61998	158.81	243560	5606200	0	-5.3024	1	7.521	27.29	27.29	225.6	219.5	2.832	0	2.832	0	0	0.03102	0	0	NaN	NaN	NaN	NaN
20140904-PurClathDigest-1ug-01	1067	1060	13.674	0.63	166.64	230030	5232200	0	-5.3024	1	7.521	27.29	27.29	225.9	219.7	2.813	0	2.813	0	0	0.03047	0	0	NaN	NaN	NaN	NaN
20140904-PurClathDigest-1ug-01	1068	1061	13.685	0.63011	160.05	218550	5305500	0	-5.3024	1	7.521	27.29	27.29	226.1	220	2.794	0	2.794	0	0	0.02992	0	0	NaN	NaN	NaN	NaN
20140904-PurClathDigest-1ug-01	1069	1062	13.695	0.61981	163.16	238310	5494700	0	-5.3024	1	7.521	27.28	27.28	226.3	220.3	2.775	0	2.775	0	0	0.02936	0	0	NaN	NaN	NaN	NaN
20140904-PurClathDigest-1ug-01	1070	1063	13.705	0.60007	142.2	254940	5687500	0	-5.3024	1	7.522	27.28	27.28	226.6	220.6	2.756	0	2.756	0	0	0.02882	0	0	NaN	NaN	NaN	NaN
20140904-PurClathDigest-1ug-01	1071	1064	13.715	0.61993	161.49	226510	5448300	0	-5.3024	1	7.522	27.28	27.28	226.8	220.8	2.738	0	2.738	0	0	0.02829	0	0	NaN	NaN	NaN	NaN
20140904-PurClathDigest-1ug-01	1072	1065	13.726	0.61077	151.49	239860	5593800	0	-5.3024	1	7.522	27.28	27.28	227	221.1	2.719	0	2.719	0	0	0.02774	0	0	NaN	NaN	NaN	NaN
20140904-PurClathDigest-1ug-01	1073	1066	13.736	0.59933	139.66	245370	5766100	0	-5.3024	1	7.522	27.28	27.28	227.3	221.4	2.7	0	2.7	0	0	0.0272	0	0	NaN	NaN	NaN	NaN
20140904-PurClathDigest-1ug-01	1074	1067	13.746	0.60997	154.88	228000	5388000	0	-5.3024	1	7.522	27.28	27.28	227.5	221.6	2.682	0	2.682	0	0	0.02667	0	0	NaN	NaN	NaN	NaN
20140904-PurClathDigest-1ug-01	1075	1068	13.756	0.62988	169.04	213980	5231500	0	-5.3024	1	7.523	27.28	27.28	227.7	221.9	2.664	0	2.664	0	0	0.02613	0	0	NaN	NaN	NaN	NaN
20140904-PurClathDigest-1ug-01	1076	1069	13.767	0.6201	155.2	314970	4738500	0	-5.3024	1	7.523	27.28	27.28	228	222.2	2.644	0	2.644	0	0	0.02558	0	0	NaN	NaN	NaN	NaN
20140904-PurClathDigest-1ug-01	1077	1070	13.777	0.61993	157.56	227040	5253400	0	-5.3024	1	7.523	27.28	27.28	228.2	222.5	2.626	0	2.626	0	0	0.02503	0	0	NaN	NaN	NaN	NaN
20140904-PurClathDigest-1ug-01	1078	1071	13.787	0.61008	149.14	220740	5263200	0	-5.3024	1	7.523	27.28	27.28	228.4	222.7	2.607	0	2.607	0	0	0.02449	0	0	NaN	NaN	NaN	NaN
20140904-PurClathDigest-1ug-01	1079	1072	13.797	0.62994	174.37	204820	4865000	0	-5.3024	1	7.523	27.28	27.28	228.7	223	2.588	0	2.588	0	0	0.02395	0	0	NaN	NaN	NaN	NaN
20140904-PurClathDigest-1ug-01	1080	1073	13.808	0.59996	140.93	332610	5174900	0	-5.3024	1	7.524	27.27	27.27	228.9	223.3	2.569	0	2.569	0	0	0.02339	0	0	NaN	NaN	NaN	NaN
20140904-PurClathDigest-1ug-01	1081	1074	13.818	0.60001	143.13	275680	5899100	0	-5.3024	1	7.524	27.27	27.27	229.1	223.6	2.551	0	2.551	0	0	0.02286	0	0	NaN	NaN	NaN	NaN
20140904-PurClathDigest-1ug-01	1082	1075	13.828	0.64013	177.18	221220	5046200	0	-5.3024	1	7.524	27.27	27.27	229.4	223.8	2.532	0	2.532	0	0	0.02233	0	0	NaN	NaN	NaN	NaN
20140904-PurClathDigest-1ug-01	1083	1076	13.839	0.65998	199.7	195740	4661800	0	-5.3024	1	7.524	27.27	27.27	229.6	224.1	2.513	0	2.513	0	0	0.02177	0	0	NaN	NaN	NaN	NaN
20140904-PurClathDigest-1ug-01	1084	1077	13.85	0.65002	183.92	223090	4671900	0	-5.3024	1	7.525	27.27	27.27	229.8	224.4	2.493	0	2.493	0	0	0.02119	0	0	NaN	NaN	NaN	NaN
20140904-PurClathDigest-1ug-01	1085	1078	13.86	0.63	168.26	204640	4849600	0	-5.3024	1	7.525	27.27	27.27	230.1	224.7	2.473	0	2.473	0	0	0.02061	0	0	NaN	NaN	NaN	NaN
20140904-PurClathDigest-1ug-01	1086	1079	13.871	0.62988	170.31	216630	5012100	0	-5.3024	1	7.525	27.27	27.27	230.3	225	2.454	0	2.454	0	0	0.02006	0	0	NaN	NaN	NaN	NaN
20140904-PurClathDigest-1ug-01	1087	1080	13.881	0.63011	159.76	226560	5221500	0	-5.3024	1	7.525	27.27	27.27	230.6	225.3	2.435	0	2.435	0	0	0.0195	0	0	NaN	NaN	NaN	NaN
20140904-PurClathDigest-1ug-01	1088	1081	13.892	0.63068	164.01	232440	5205300	0	-5.3024	1	7.525	27.27	27.27	230.8	225.5	2.416	0	2.416	0	0	0.01895	0	0	NaN	NaN	NaN	NaN
20140904-PurClathDigest-1ug-01	1089	1082	13.902	0.6193	164.35	201830	4891000	0	-5.3024	1	7.526	27.27	27.27	231	225.8	2.396	0	2.396	0	0	0.01839	0	0	NaN	NaN	NaN	NaN
20140904-PurClathDigest-1ug-01	1090	1083	13.913	0.5999	138.54	241910	5556600	0	-5.3024	1	7.526	27.26	27.26	231.3	226.1	2.378	0	2.378	0	0	0.01785	0	0	NaN	NaN	NaN	NaN
20140904-PurClathDigest-1ug-01	1091	1084	13.923	0.61998	164.89	199270	4881500	0	-5.3024	1	7.526	27.26	27.26	231.5	226.4	2.359	0	2.359	0	0	0.01732	0	0	NaN	NaN	NaN	NaN
20140904-PurClathDigest-1ug-01	1092	1085	13.933	0.63	167.3	190980	4758700	0	-5.3024	1	7.526	27.26	27.26	231.7	226.6	2.34	0	2.34	0	0	0.01677	0	0	NaN	NaN	NaN	NaN
20140904-PurClathDigest-1ug-01	1093	1086	13.944	0.6201	149.62	232980	5523100	0	-5.3024	1	7.526	27.26	27.26	232	226.9	2.321	0	2.321	0	0	0.01621	0	0	NaN	NaN	NaN	NaN
20140904-PurClathDigest-1ug-01	1094	1087	13.954	0.6201	161.98	227820	5261000	0	-5.3024	1	7.535	27.32	27.32	232.1	227.1	2.302	0	2.302	0	0	0.01577	0	0	NaN	NaN	NaN	NaN
20140904-PurClathDigest-1ug-01	1095	1088	13.964	0.61993	156.41	244960	5297900	0	-5.3024	1	7.557	27.46	27.46	232.2	227.2	2.281	0	2.281	0	0	0.0155	0	0	NaN	NaN	NaN	NaN
20140904-PurClathDigest-1ug-01	1096	1089	13.975	0.6102	144.34	255320	5634900	0	-5.3024	1	7.578	27.61	27.61	232.2	227.3	2.259	0	2.259	0	0	0.01522	0	0	NaN	NaN	NaN	NaN
20140904-PurClathDigest-1ug-01	1097	1090	13.985	0.6197	159.18	216120	5226800	0	-5.3024	1	7.6	27.76	27.76	232.3	227.4	2.239	0	2.239	0	0	0.01495	0	0	NaN	NaN	NaN	NaN
20140904-PurClathDigest-1ug-01	1098	1091	13.995	0.61998	159.99	222440	5091700	0	-5.3024	1	7.621	27.9	27.9	232.3	227.5	2.218	0	2.218	0	0	0.01468	0	0	NaN	NaN	NaN	NaN
20140904-PurClathDigest-1ug-01	1099	1092	14.005	0.6201	158.38	240530	5423100	0	-5.3024	1	7.643	28.05	28.05	232.4	227.6	2.197	0	2.197	0	0	0.01441	0	0	NaN	NaN	NaN	NaN
20140904-PurClathDigest-1ug-01	1100	1093	14.016	0.62004	157.25	235380	5366400	0	-5.3024	1	7.665	28.2	28.2	232.5	227.7	2.176	0	2.176	0	0	0.01413	0	0	NaN	NaN	NaN	NaN
20140904-PurClathDigest-1ug-01	1101	1094	14.026	0.63	168.58	238360	5312200	0	-5.3024	1	7.687	28.35	28.35	232.5	227.8	2.155	0	2.155	0	0	0.01386	0	0	NaN	NaN	NaN	NaN
20140904-PurClathDigest-1ug-01	1102	1095	14.037	0.60997	145.61	246210	5647000	0	-5.3024	1	7.709	28.5	28.5	232.6	227.9	2.133	0	2.133	0	0	0.01358	0	0	NaN	NaN	NaN	NaN
20140904-PurClathDigest-1ug-01	1103	1096	14.047	0.63023	174.95	225790	5150300	0	-5.3024	1	7.73	28.64	28.64	232.6	228	2.112	0	2.112	0	0	0.01331	0	0	NaN	NaN	NaN	NaN
20140904-PurClathDigest-1ug-01	1104	1097	14.057	0.6098	150.12	220940	5419100	0	-5.3024	1	7.752	28.79	28.79	232.7	228.1	2.091	0	2.091	0	0	0.01304	0	0	NaN	NaN	NaN	NaN
20140904-PurClathDigest-1ug-01	1105	1098	14.067	0.61987	163.64	221790	5166900	0	-5.3024	1	7.774	28.94	28.94	232.7	228.2	2.07	0	2.07	0	0	0.01277	0	0	NaN	NaN	NaN	NaN
20140904-PurClathDigest-1ug-01	1106	1099	14.078	0.61003	150	220090	5401000	0	-5.3024	1	7.795	29.08	29.08	232.8	228.3	2.049	0	2.049	0	0	0.01249	0	0	NaN	NaN	NaN	NaN
20140904-PurClathDigest-1ug-01	1107	1100	14.088	0.60007	144.87	224420	5517600	0	-5.3024	1	7.817	29.23	29.23	232.8	228.4	2.029	0	2.029	0	0	0.01223	0	0	NaN	NaN	NaN	NaN
20140904-PurClathDigest-1ug-01	1108	1101	14.098	0.5999	140.12	255360	5621700	0	-5.3024	1	7.838	29.37	29.37	232.9	228.5	2.008	0	2.008	0	0	0.01196	0	0	NaN	NaN	NaN	NaN
20140904-PurClathDigest-1ug-01	1109	1102	14.108	0.59011	133.74	272430	6113300	0	-5.3024	1	7.859	29.51	29.51	232.9	228.6	1.988	0	1.988	0	0	0.0117	0	0	NaN	NaN	NaN	NaN
20140904-PurClathDigest-1ug-01	1110	1103	14.118	0.60001	136.48	269070	6032300	0	-5.3024	1	7.88	29.65	29.65	233	228.7	1.968	0	1.968	0	0	0.01144	0	0	NaN	NaN	NaN	NaN
20140904-PurClathDigest-1ug-01	1111	1104	14.128	0.61998	160.52	234790	5333100	0	-5.3024	1	7.901	29.8	29.8	233	228.8	1.947	0	1.947	0	0	0.01117	0	0	NaN	NaN	NaN	NaN
20140904-PurClathDigest-1ug-01	1112	1105	14.138	0.95999	500	109840	2463800	0	-5.3024	1	7.922	29.94	29.94	233.1	228.9	1.926	0	1.926	0	0	0.0109	0	0	NaN	NaN	NaN	NaN
20140904-PurClathDigest-1ug-01	1113	1106	14.154	0.61003	145.23	240190	5563300	0	-5.3024	1	7.956	30.17	30.17	233.2	229.1	1.894	0	1.894	0	0	0.01047	0	0	NaN	NaN	NaN	NaN
20140904-PurClathDigest-1ug-01	1114	1107	14.164	0.63	168.06	215870	5049000	0	-5.3024	1	7.978	30.32	30.32	233.2	229.2	1.873	0	1.873	0	0	0.01021	0	0	NaN	NaN	NaN	NaN
20140904-PurClathDigest-1ug-01	1115	1108	14.175	0.6102	154.92	226480	5294000	0	-5.3024	1	8	30.47	30.47	233.3	229.3	1.852	0	1.852	0	0	0.009928	0	0	NaN	NaN	NaN	NaN
20140904-PurClathDigest-1ug-01	1116	1109	14.185	0.6197	160.38	220550	5173800	0	-5.3024	1	8.021	30.61	30.61	233.3	229.4	1.831	0	1.831	0	0	0.009659	0	0	NaN	NaN	NaN	NaN
20140904-PurClathDigest-1ug-01	1117	1110	14.195	0.60001	143.4	314770	4558300	0	-5.3024	1	8.043	30.76	30.76	233.4	229.5	1.81	0	1.81	0	0	0.009386	0	0	NaN	NaN	NaN	NaN
20140904-PurClathDigest-1ug-01	1118	1111	14.205	0.63	162.82	223990	5005900	0	-5.3024	1	8.064	30.9	30.9	233.4	229.6	1.79	0	1.79	0	0	0.009121	0	0	NaN	NaN	NaN	NaN
20140904-PurClathDigest-1ug-01	1119	1112	14.216	0.63	170.97	222790	5091400	0	-5.3024	1	8.086	31.05	31.05	233.5	229.7	1.768	0	1.768	0	0	0.008843	0	0	NaN	NaN	NaN	NaN
20140904-PurClathDigest-1ug-01	1120	1113	14.226	0.61008	152.57	251310	5581000	0	-5.3024	1	8.108	31.2	31.2	233.5	229.8	1.747	0	1.747	0	0	0.008565	0	0	NaN	NaN	NaN	NaN
20140904-PurClathDigest-1ug-01	1121	1114	14.236	0.63011	175.02	315090	5192700	0	-5.3024	1	8.129	31.35	31.35	233.6	229.9	1.726	0	1.726	0	0	0.008296	0	0	NaN	NaN	NaN	NaN
20140904-PurClathDigest-1ug-01	1122	1115	14.247	0.6098	153.11	254940	5675600	0	-5.3024	1	8.152	31.5	31.5	233.6	230	1.705	0	1.705	0	0	0.008019	0	0	NaN	NaN	NaN	NaN
20140904-PurClathDigest-1ug-01	1123	1116	14.257	0.61008	155.11	233290	5485400	0	-5.3024	1	8.166	31.59	31.59	233.6	230	1.7	0	1.7	0	0	0.00775	0	0	NaN	NaN	NaN	NaN
20140904-PurClathDigest-1ug-01	1124	1117	14.267	0.62994	167.82	225310	5280700	0	-5.3024	1	8.177	31.65	31.65	233.5	229.9	1.703	0	1.703	0	0	0.007481	0	0	NaN	NaN	NaN	NaN
20140904-PurClathDigest-1ug-01	1125	1118	14.278	0.61008	152.86	237300	5430300	0	-5.3024	1	8.189	31.72	31.72	233.5	229.8	1.706	0	1.706	0	0	0.007203	0	0	NaN	NaN	NaN	NaN
20140904-PurClathDigest-1ug-01	1126	1119	14.288	0.5999	142.46	217050	5169400	0	-5.3024	1	8.2	31.79	31.79	233.4	229.8	1.709	0	1.709	0	0	0.006934	0	0	NaN	NaN	NaN	NaN
20140904-PurClathDigest-1ug-01	1127	1120	14.298	0.62027	163.8	219410	5191700	0	-5.3024	1	8.212	31.85	31.85	233.4	229.7	1.712	0	1.712	0	0	0.006669	0	0	NaN	NaN	NaN	NaN
20140904-PurClathDigest-1ug-01	1128	1121	14.308	0.62983	166.63	204510	4874500	0	-5.3024	1	8.223	31.92	31.92	233.3	229.7	1.715	0	1.715	0	0	0.006396	0	0	NaN	NaN	NaN	NaN
20140904-PurClathDigest-1ug-01	1129	1122	14.319	0.63	171.02	219480	5088200	0	-5.3024	1	8.235	31.99	31.99	233.3	229.6	1.718	0	1.718	0	0	0.006118	0	0	NaN	NaN	NaN	NaN
20140904-PurClathDigest-1ug-01	1130	1123	14.329	0.61998	158.88	235410	5365300	0	-5.3024	1	8.247	32.05	32.05	233.2	229.5	1.721	0	1.721	0	0	0.005841	0	0	NaN	NaN	NaN	NaN
20140904-PurClathDigest-1ug-01	1131	1124	14.34	0.6399	180.92	201960	4796700	0	-5.3024	1	8.258	32.12	32.12	233.1	229.5	1.724	0	1.724	0	0	0.005567	0	0	NaN	NaN	NaN	NaN
20140904-PurClathDigest-1ug-01	1132	1125	14.35	0.64001	177.17	216540	4987700	0	-5.3024	1	8.27	32.19	32.19	233.1	229.4	1.728	0	1.728	0	0	0.005285	0	0	NaN	NaN	NaN	NaN
20140904-PurClathDigest-1ug-01	1133	1126	14.361	0.61998	157.13	222510	5437500	0	-5.3024	1	8.282	32.26	32.26	233	229.4	1.731	0	1.731	0	0	0.005003	0	0	NaN	NaN	NaN	NaN
20140904-PurClathDigest-1ug-01	1134	1127	14.371	0.63011	165.8	213370	5259600	0	-5.3024	1	8.293	32.33	32.33	233	229.3	1.734	0	1.734	0	0	0.004729	0	0	NaN	NaN	NaN	NaN
20140904-PurClathDigest-1ug-01	1135	1128	14.382	0.61998	150.35	235990	5350800	0	-5.3024	1	8.305	32.39	32.39	232.9	229.2	1.737	0	1.737	0	0	0.004452	0	0	NaN	NaN	NaN	NaN
20140904-PurClathDigest-1ug-01	1136	1129	14.392	0.64001	180.85	194930	4594100	0	-5.3024	1	8.317	32.46	32.46	232.9	229.2	1.74	0	1.74	0	0	0.004178	0	0	NaN	NaN	NaN	NaN
20140904-PurClathDigest-1ug-01	1137	1130	14.403	0.66004	199.53	189250	4351800	0	-5.3024	1	8.329	32.53	32.53	232.8	229.1	1.743	0	1.743	0	0	0.003896	0	0	NaN	NaN	NaN	NaN
20140904-PurClathDigest-1ug-01	1138	1131	14.414	0.63995	184.92	198540	4840400	0	-5.3024	1	8.341	32.6	32.6	232.7	229.1	1.746	0	1.746	0	0	0.003605	0	0	NaN	NaN	NaN	NaN
20140904-PurClathDigest-1ug-01	1139	1132	14.424	0.5999	137.77	260730	5508800	0	-5.3024	1	8.353	32.67	32.67	232.7	229	1.749	0	1.749	0	0	0.003323	0	0	NaN	NaN	NaN	NaN
20140904-PurClathDigest-1ug-01	1140	1133	14.434	0.63011	162.98	247700	5253000	0	-5.3024	1	8.364	32.74	32.74	232.6	228.9	1.752	0	1.752	0	0	0.003058	0	0	NaN	NaN	NaN	NaN
20140904-PurClathDigest-1ug-01	1141	1134	14.445	0.66004	178.27	237100	4937000	0	-5.3024	1	8.376	32.8	32.8	232.6	228.9	1.755	0	1.755	0	0	0.002781	0	0	NaN	NaN	NaN	NaN
20140904-PurClathDigest-1ug-01	1142	1135	14.456	0.62016	158.29	225450	5294900	0	-5.3024	1	8.388	32.87	32.87	232.5	228.8	1.758	0	1.758	0	0	0.00249	0	0	NaN	NaN	NaN	NaN
20140904-PurClathDigest-1ug-01	1143	1136	14.466	0.6098	154.82	224210	5367000	0	-5.3024	1	8.399	32.94	32.94	232.5	228.8	1.761	0	1.761	0	0	0.002216	0	0	NaN	NaN	NaN	NaN
20140904-PurClathDigest-1ug-01	1144	1137	14.476	0.64974	163.9	211700	5104000	0	-5.3024	1	8.411	33.01	33.01	232.4	228.7	1.764	0	1.764	0	0	0.001947	0	0	NaN	NaN	NaN	NaN
20140904-PurClathDigest-1ug-01	1145	1138	14.487	0.61026	154.46	228340	5257900	0	-5.3024	1	8.423	33.08	33.08	232.3	228.6	1.767	0	1.767	0	0	0.001661	0	0	NaN	NaN	NaN	NaN
20140904-PurClathDigest-1ug-01	1146	1139	14.497	0.62004	160.94	234610	5299900	0	-5.3024	1	8.434	33.14	33.14	232.3	228.6	1.77	0	1.77	0	0	0.001392	0	0	NaN	NaN	NaN	NaN
20140904-PurClathDigest-1ug-01	1147	1140	14.508	0.61998	164.82	214300	5129400	0	-5.3024	1	8.446	33.21	33.21	232.2	228.5	1.773	0	1.773	0	0	0.001118	0	0	NaN	NaN	NaN	NaN
20140904-PurClathDigest-1ug-01	1148	1141	14.518	0.61998	160.18	222200	5338300	0	-5.3024	1	8.457	33.28	33.28	232.2	228.5	1.776	0	1.776	0	0	0.0008449	0	0	NaN	NaN	NaN	NaN
20140904-PurClathDigest-1ug-01	1149	1142	14.528	0.62021	160.3	235330	5296400	0	-5.3024	1	8.469	33.34	33.34	232.1	228.4	1.779	0	1.779	0	0	0.0005716	0	0	NaN	NaN	NaN	NaN
20140904-PurClathDigest-1ug-01	1150	1143	14.539	0.62971	173.6	210310	4956400	0	-5.3024	1	8.48	33.41	33.41	232.1	228.3	1.782	0	1.782	0	0	0.0002981	0	0	NaN	NaN	NaN	NaN
20140904-PurClathDigest-1ug-01	1151	1144	14.549	0.63	164.44	216360	5009900	0	-5.3024	1	8.492	33.48	33.48	232	228.3	1.785	0	1.785	0	0	2.046E-05	0	0	NaN	NaN	NaN	NaN
20140904-PurClathDigest-1ug-01	1152	1145	14.56	0.65008	183.96	200490	4673800	0	-5.3024	1	8.489	33.36	33.36	231.9	228.1	1.788	0	1.788	0	0	0	0		NaN	NaN	NaN	NaN
20140904-PurClathDigest-1ug-01	1153	1146	14.571	0.61003	154.97	223420	5237400	0	-5.3024	1	8.484	33.22	33.22	231.7	228	1.79	0	1.79	0	0	0	0		NaN	NaN	NaN	NaN
20140904-PurClathDigest-1ug-01	1154	1147	14.581	0.62988	174.81	210490	4982700	0	-5.3024	1	8.48	33.09	33.09	231.6	227.8	1.791	0	1.791	0	0	0	0		NaN	NaN	NaN	NaN
20140904-PurClathDigest-1ug-01	1155	1148	14.591	0.61008	149.49	245690	5435600	0	-5.3024	1	8.476	32.96	32.96	231.4	227.7	1.793	0	1.793	0	0	0	0		NaN	NaN	NaN	NaN
20140904-PurClathDigest-1ug-01	1156	1149	14.601	0.6308	164.15	223070	5212400	0	-5.3024	1	8.471	32.83	32.83	231.3	227.6	1.795	0	1.795	0	0	0	0		NaN	NaN	NaN	NaN
20140904-PurClathDigest-1ug-01	1157	1150	14.612	0.64911	173.49	217980	4934700	0	-5.3024	1	8.467	32.69	32.69	231.2	227.4	1.797	0	1.797	0	0	0	0		NaN	NaN	NaN	NaN
20140904-PurClathDigest-1ug-01	1158	1151	14.623	0.63	170.82	200690	5046300	0	-5.3024	1	8.462	32.55	32.55	231	227.3	1.799	0	1.799	0	0	0	0		NaN	NaN	NaN	NaN
20140904-PurClathDigest-1ug-01	1159	1152	14.633	0.61014	154.05	290430	5272100	0	-5.3024	1	8.458	32.42	32.42	230.9	227.1	1.801	0	1.801	0	0	0	0		NaN	NaN	NaN	NaN
20140904-PurClathDigest-1ug-01	1160	1153	14.643	0.61998	158.77	237990	5372900	0	-5.3024	1	8.454	32.29	32.29	230.7	227	1.803	0	1.803	0	0	0	0		NaN	NaN	NaN	NaN
20140904-PurClathDigest-1ug-01	1161	1154	14.654	0.60997	150.65	254020	5564100	0	-5.3024	1	8.449	32.16	32.16	230.6	226.8	1.805	0	1.805	0	0	0	0		NaN	NaN	NaN	NaN
20140904-PurClathDigest-1ug-01	1162	1155	14.664	0.60001	137.92	288390	6080600	0	-5.3024	1	8.445	32.03	32.03	230.5	226.7	1.807	0	1.807	0	0	0	0		NaN	NaN	NaN	NaN
20140904-PurClathDigest-1ug-01	1163	1156	14.674	0.61003	146.46	232560	5434300	0	-5.3024	1	8.441	31.9	31.9	230.3	226.5	1.809	0	1.809	0	0	0	0		NaN	NaN	NaN	NaN
20140904-PurClathDigest-1ug-01	1164	1157	14.684	0.60986	143.99	266240	5805300	0	-5.3024	1	8.437	31.77	31.77	230.2	226.4	1.811	0	1.811	0	0	0	0		NaN	NaN	NaN	NaN
20140904-PurClathDigest-1ug-01	1165	1158	14.694	0.6201	157.7	232320	5212000	0	-5.3024	1	8.432	31.64	31.64	230	226.3	1.812	0	1.812	0	0	0	0		NaN	NaN	NaN	NaN
20140904-PurClathDigest-1ug-01	1166	1159	14.705	0.66994	209.78	228460	4713200	0	-5.3024	1	8.428	31.51	31.51	229.9	226.1	1.814	0	1.814	0	0	0	0		NaN	NaN	NaN	NaN
20140904-PurClathDigest-1ug-01	1167	1160	14.716	0.77007	299.43	172040	3788300	0	-5.3024	1	8.423	31.37	31.37	229.8	226	1.816	0	1.816	0	0	0	0		NaN	NaN	NaN	NaN
20140904-PurClathDigest-1ug-01	1168	1161	14.729	0.60991	154.87	253400	5531000	0	-5.3024	1	8.418	31.2	31.2	229.6	225.8	1.819	0	1.819	0	0	0	0		NaN	NaN	NaN	NaN
20140904-PurClathDigest-1ug-01	1169	1162	14.739	0.60001	139.87	273410	5977900	0	-5.3024	1	8.414	31.07	31.07	229.4	225.6	1.821	0	1.821	0	0	0	0		NaN	NaN	NaN	NaN
20140904-PurClathDigest-1ug-01	1170	1163	14.749	0.6201	157.13	224300	5300100	0	-5.3024	1	8.41	30.94	30.94	229.3	225.5	1.823	0	1.823	0	0	0	0		NaN	NaN	NaN	NaN
20140904-PurClathDigest-1ug-01	1171	1164	14.759	0.63	164.39	227020	5305200	0	-5.3024	1	8.405	30.81	30.81	229.2	225.4	1.824	0	1.824	0	0	0	0		NaN	NaN	NaN	NaN
20140904-PurClathDigest-1ug-01	1172	1165	14.77	0.61987	165.34	229980	5255600	0	-5.3024	1	8.401	30.68	30.68	229	225.2	1.826	0	1.826	0	0	0	0		NaN	NaN	NaN	NaN
20140904-PurClathDigest-1ug-01	1173	1166	14.78	0.62004	161.52	233760	5423500	0	-5.3024	1	8.397	30.55	30.55	228.9	225.1	1.828	0	1.828	0	0	0	0		NaN	NaN	NaN	NaN
20140904-PurClathDigest-1ug-01	1174	1167	14.79	0.62027	157.11	223020	5276500	0	-5.3024	1	8.392	30.41	30.41	228.7	224.9	1.83	0	1.83	0	0	0	0		NaN	NaN	NaN	NaN
20140904-PurClathDigest-1ug-01	1175	1168	14.801	0.68979	229.18	193260	4421600	0	-5.3024	1	8.388	30.28	30.28	228.6	224.8	1.832	0	1.832	0	0	0	0		NaN	NaN	NaN	NaN
20140904-PurClathDigest-1ug-01	1176	1169	14.812	0.64001	168.9	199400	5038100	0	-5.3024	1	8.383	30.13	30.13	228.4	224.6	1.834	0	1.834	0	0	0	0		NaN	NaN	NaN	NaN
20140904-PurClathDigest-1ug-01	1177	1170	14.823	0.6201	158.54	237120	5327900	0	-5.3024	1	8.379	30	30	228.3	224.5	1.836	0	1.836	0	0	0	0		NaN	NaN	NaN	NaN
20140904-PurClathDigest-1ug-01	1178	1171	14.833	0.6098	153.3	229670	5304800	0	-5.3024	1	8.374	29.87	29.87	228.2	224.3	1.838	0	1.838	0	0	0	0		NaN	NaN	NaN	NaN
20140904-PurClathDigest-1ug-01	1179	1172	14.843	0.6201	161.6	234830	5293100	0	-5.3024	1	8.37	29.74	29.74	228	224.2	1.84	0	1.84	0	0	0	0		NaN	NaN	NaN	NaN
20140904-PurClathDigest-1ug-01	1180	1173	14.854	0.60991	155.4	245080	5546800	0	-5.3024	1	8.374	29.65	29.65	227.7	223.9	1.842	0	1.842	0	0	0	0		NaN	NaN	NaN	NaN
20140904-PurClathDigest-1ug-01	1181	1174	14.864	0.61008	155.47	241660	5484400	0	-5.3024	1	8.394	29.66	29.66	227.2	223.4	1.845	0	1.845	0	0	0	0		NaN	NaN	NaN	NaN
20140904-PurClathDigest-1ug-01	1182	1175	14.874	0.61003	153.51	250350	5554600	0	-5.3024	1	8.414	29.67	29.67	226.7	222.8	1.848	0	1.848	0	0	0	0		NaN	NaN	NaN	NaN
20140904-PurClathDigest-1ug-01	1183	1176	14.884	0.62988	165.88	208170	5179200	0	-5.3024	1	8.434	29.67	29.67	226.1	222.3	1.85	0	1.85	0	0	0	0		NaN	NaN	NaN	NaN
20140904-PurClathDigest-1ug-01	1184	1177	14.895	0.64081	170.55	197570	4956300	0	-5.3024	1	8.455	29.68	29.68	225.5	221.7	1.853	0	1.853	0	0	0	0		NaN	NaN	NaN	NaN
20140904-PurClathDigest-1ug-01	1185	1178	14.905	0.60917	149	207760	5091100	0	-5.3024	1	8.476	29.69	29.69	225	221.1	1.856	0	1.856	0	0	0	0		NaN	NaN	NaN	NaN
20140904-PurClathDigest-1ug-01	1186	1179	14.915	0.61014	152.22	234450	5444800	0	-5.3024	1	8.496	29.7	29.7	224.4	220.6	1.859	0	1.859	0	0	0	0		NaN	NaN	NaN	NaN
20140904-PurClathDigest-1ug-01	1187	1180	14.926	0.5999	142.24	223980	5373600	0	-5.3024	1	8.516	29.7	29.7	223.9	220	1.861	0	1.861	0	0	0	0		NaN	NaN	NaN	NaN
20140904-PurClathDigest-1ug-01	1188	1181	14.936	0.65008	194.57	194830	4612200	0	-5.3024	1	8.536	29.71	29.71	223.3	219.5	1.864	0	1.864	0	0	0	0		NaN	NaN	NaN	NaN
20140904-PurClathDigest-1ug-01	1189	1182	14.946	0.61998	160.14	232770	5403100	0	-5.3024	1	8.557	29.72	29.72	222.8	218.9	1.867	0	1.867	0	0	0	0		NaN	NaN	NaN	NaN
20140904-PurClathDigest-1ug-01	1190	1183	14.957	0.63023	168.41	220690	5307100	0	-5.3024	1	8.577	29.72	29.72	222.2	218.3	1.87	0	1.87	0	0	0	0		NaN	NaN	NaN	NaN
20140904-PurClathDigest-1ug-01	1191	1184	14.967	0.6197	156.93	229010	5507300	0	-5.3024	1	8.598	29.73	29.73	221.6	217.7	1.872	0	1.872	0	0	0	0		NaN	NaN	NaN	NaN
20140904-PurClathDigest-1ug-01	1192	1185	14.978	0.60007	141.1	236250	5650800	0	-5.3024	1	8.618	29.74	29.74	221.1	217.2	1.875	0	1.875	0	0	0	0		NaN	NaN	NaN	NaN
20140904-PurClathDigest-1ug-01	1193	1186	14.988	0.60001	144.98	215420	5652200	0	-5.3024	1	8.638	29.75	29.75	220.5	216.6	1.878	0	1.878	0	0	0	0		NaN	NaN	NaN	NaN
20140904-PurClathDigest-1ug-01	1194	1187	14.998	0.63	173.91	229540	5290100	0	-5.3024	1	8.658	29.75	29.75	220	216.1	1.88	0	1.88	0	0	0	0		NaN	NaN	NaN	NaN
20140904-PurClathDigest-1ug-01	1195	1188	15.008	0.65002	186.68	184740	4814300	0	-5.3024	1	8.678	29.76	29.76	219.4	215.5	1.883	0	1.883	0	0	0	0		NaN	NaN	NaN	NaN
20140904-PurClathDigest-1ug-01	1196	1189	15.019	0.60997	146.28	228230	5504200	0	-5.3024	1	8.7	29.77	29.77	218.9	214.9	1.886	0	1.886	0	0	0	0		NaN	NaN	NaN	NaN
20140904-PurClathDigest-1ug-01	1197	1190	15.029	0.60001	143.12	241380	5764600	0	-5.3024	1	8.72	29.78	29.78	218.3	214.4	1.889	0	1.889	0	0	0	0		NaN	NaN	NaN	NaN
20140904-PurClathDigest-1ug-01	1198	1191	15.039	0.60991	146.75	241740	5725200	0	-5.3024	1	8.74	29.78	29.78	217.8	213.9	1.891	0	1.891	0	0	0	0		NaN	NaN	NaN	NaN
20140904-PurClathDigest-1ug-01	1199	1192	15.049	0.64997	189.41	203690	4956800	0	-5.3024	1	8.76	29.79	29.79	217.2	213.3	1.894	0	1.894	0	0	0	0		NaN	NaN	NaN	NaN
20140904-PurClathDigest-1ug-01	1200	1193	15.06	0.63086	167.92	227150	5234300	0	-5.3024	1	8.781	29.8	29.8	216.7	212.7	1.897	0	1.897	0	0	0	0		NaN	NaN	NaN	NaN
20140904-PurClathDigest-1ug-01	1201	1194	15.071	0.62925	163.18	208910	5353900	0	-5.3024	1	8.802	29.81	29.81	216.1	212.1	1.9	0	1.9	0	0	0	0		NaN	NaN	NaN	NaN
20140904-PurClathDigest-1ug-01	1202	1195	15.081	0.62994	171.69	203540	5068400	0	-5.3024	1	8.822	29.81	29.81	215.5	211.6	1.902	0	1.902	0	0	0	0		NaN	NaN	NaN	NaN
20140904-PurClathDigest-1ug-01	1203	1196	15.092	0.61008	146.46	221580	5401300	0	-5.3024	1	8.843	29.82	29.82	215	211	1.905	0	1.905	0	0	0	0		NaN	NaN	NaN	NaN
20140904-PurClathDigest-1ug-01	1204	1197	15.102	0.61998	163.84	209730	5221400	0	-5.3024	1	8.863	29.83	29.83	214.4	210.5	1.908	0	1.908	0	0	0	0		NaN	NaN	NaN	NaN
20140904-PurClathDigest-1ug-01	1205	1198	15.112	0.61993	144.96	218490	5616500	0	-5.3024	1	8.883	29.83	29.83	213.9	209.9	1.911	0	1.911	0	0	0	0		NaN	NaN	NaN	NaN
20140904-PurClathDigest-1ug-01	1206	1199	15.122	0.61008	151.25	235620	5602000	0	-5.3024	1	8.904	29.84	29.84	213.3	209.3	1.913	0	1.913	0	0	0	0		NaN	NaN	NaN	NaN
20140904-PurClathDigest-1ug-01	1207	1200	15.133	0.70988	243.22	162680	4130900	0	-5.3024	1	8.924	29.85	29.85	212.8	208.8	1.916	0	1.916	0	0	0	0		NaN	NaN	NaN	NaN
20140904-PurClathDigest-1ug-01	1208	1201	15.144	0.6102	148.91	219000	5372700	0	-5.3024	1	8.947	29.86	29.86	212.1	208.1	1.919	0	1.919	0	0	0	0		NaN	NaN	NaN	NaN
20140904-PurClathDigest-1ug-01	1209	1202	15.155	0.64991	187.07	227370	5135500	0	-5.3024	1	8.969	29.86	29.86	211.5	207.5	1.92	0	1.92	0	0	0	0		NaN	NaN	NaN	NaN
20140904-PurClathDigest-1ug-01	1210	1203	15.165	0.70993	245.09	173110	4008200	0	-5.3024	1	8.995	29.87	29.87	210.8	206.8	1.919	0	1.919	0	0	0	0		NaN	NaN	NaN	NaN
20140904-PurClathDigest-1ug-01	1211	1204	15.177	0.61008	152.78	221310	5539200	0	-5.3024	1	9.023	29.88	29.88	210	206	1.918	0	1.918	0	0	0	0		NaN	NaN	NaN	NaN
20140904-PurClathDigest-1ug-01	1212	1205	15.187	0.61987	157.76	209750	5248900	0	-5.3024	1	9.048	29.89	29.89	209.3	205.3	1.918	0	1.918	0	0	0	0		NaN	NaN	NaN	NaN
20140904-PurClathDigest-1ug-01	1213	1206	15.198	0.64001	181.63	198570	4800100	0	-5.3024	1	9.073	29.9	29.9	208.6	204.6	1.917	0	1.917	0	0	0	0		NaN	NaN	NaN	NaN
20140904-PurClathDigest-1ug-01	1214	1207	15.208	0.63011	169.94	228140	5127500	0	-5.3024	1	9.098	29.91	29.91	207.8	203.8	1.916	0	1.916	0	0	0	0		NaN	NaN	NaN	NaN
20140904-PurClathDigest-1ug-01	1215	1208	15.219	0.64001	175.81	197310	4924700	0	-5.3024	1	9.123	29.91	29.91	207.1	203.1	1.915	0	1.915	0	0	0	0		NaN	NaN	NaN	NaN
20140904-PurClathDigest-1ug-01	1216	1209	15.23	0.63	167.34	220470	5276300	0	-5.3024	1	9.149	29.92	29.92	206.4	202.4	1.914	0	1.914	0	0	0	0		NaN	NaN	NaN	NaN
20140904-PurClathDigest-1ug-01	1217	1210	15.24	0.60991	143.18	239960	5785300	0	-5.3024	1	9.174	29.93	29.93	205.7	201.7	1.913	0	1.913	0	0	0	0		NaN	NaN	NaN	NaN
20140904-PurClathDigest-1ug-01	1218	1211	15.25	0.63	165.5	211090	5233900	0	-5.3024	1	9.199	29.94	29.94	205	201	1.913	0	1.913	0	0	0	0		NaN	NaN	NaN	NaN
20140904-PurClathDigest-1ug-01	1219	1212	15.261	0.61998	156.28	219540	5412000	0	-5.3024	1	9.224	29.95	29.95	204.3	200.3	1.912	0	1.912	0	0	0	0		NaN	NaN	NaN	NaN
20140904-PurClathDigest-1ug-01	1220	1213	15.271	0.61003	150.04	229040	5312800	0	-5.3024	1	9.249	29.95	29.95	203.6	199.6	1.911	0	1.911	0	0	0	0		NaN	NaN	NaN	NaN
20140904-PurClathDigest-1ug-01	1221	1214	15.281	0.60007	138.94	263040	5873600	0	-5.3024	1	9.273	29.96	29.96	202.9	198.9	1.91	0	1.91	0	0	0	0		NaN	NaN	NaN	NaN
20140904-PurClathDigest-1ug-01	1222	1215	15.291	0.62021	160.01	245220	5205200	0	-5.3024	1	9.297	29.97	29.97	202.2	198.2	1.909	0	1.909	0	0	0	0		NaN	NaN	NaN	NaN
20140904-PurClathDigest-1ug-01	1223	1216	15.302	0.60968	153.39	213900	5453700	0	-5.3024	1	9.322	29.98	29.98	201.5	197.5	1.909	0	1.909	0	0	0	0		NaN	NaN	NaN	NaN
20140904-PurClathDigest-1ug-01	1224	1217	15.312	0.63011	156.43	225270	5510200	0	-5.3024	1	9.346	29.99	29.99	200.8	196.8	1.908	0	1.908	0	0	0	0		NaN	NaN	NaN	NaN
20140904-PurClathDigest-1ug-01	1225	1218	15.322	0.60991	148.77	238930	5661000	0	-5.3024	1	9.372	29.99	29.99	200.1	196.1	1.907	0	1.907	0	0	0	0		NaN	NaN	NaN	NaN
20140904-PurClathDigest-1ug-01	1226	1219	15.332	0.61998	161.05	231820	5372100	0	-5.3024	1	9.396	30	30	199.4	195.4	1.906	0	1.906	0	0	0	0		NaN	NaN	NaN	NaN
20140904-PurClathDigest-1ug-01	1227	1220	15.343	0.65008	189.27	214230	4710100	0	-5.3024	1	9.421	30.01	30.01	198.7	194.7	1.905	0	1.905	0	0	0	0		NaN	NaN	NaN	NaN
20140904-PurClathDigest-1ug-01	1228	1221	15.354	0.62004	158.9	218570	5300700	0	-5.3024	1	9.447	30.02	30.02	198	193.9	1.904	0	1.904	0	0	0	0		NaN	NaN	NaN	NaN
20140904-PurClathDigest-1ug-01	1229	1222	15.364	0.61026	153.97	239980	5525100	0	-5.3024	1	9.472	30.03	30.03	197.3	193.2	1.904	0	1.904	0	0	0	0		NaN	NaN	NaN	NaN
20140904-PurClathDigest-1ug-01	1230	1223	15.374	0.61964	154.24	234860	5701500	0	-5.3024	1	9.496	30.03	30.03	196.6	192.5	1.903	0	1.903	0	0	0	0		NaN	NaN	NaN	NaN
20140904-PurClathDigest-1ug-01	1231	1224	15.384	0.6201	164.32	208970	5234700	0	-5.3024	1	9.521	30.04	30.04	195.9	191.8	1.902	0	1.902	0	0	0	0		NaN	NaN	NaN	NaN
20140904-PurClathDigest-1ug-01	1232	1225	15.395	0.61987	165.11	209370	5337800	0	-5.3024	1	9.546	30.05	30.05	195.2	191.1	1.901	0	1.901	0	0	0	0		NaN	NaN	NaN	NaN
20140904-PurClathDigest-1ug-01	1233	1226	15.405	0.6201	159.02	231050	5398500	0	-5.3024	1	9.57	30.06	30.06	194.5	190.4	1.9	0	1.9	0	0	0	0		NaN	NaN	NaN	NaN
20140904-PurClathDigest-1ug-01	1234	1227	15.415	0.63	165.4	236890	5410500	0	-5.3024	1	9.595	30.06	30.06	193.7	189.7	1.9	0	1.9	0	0	0	0		NaN	NaN	NaN	NaN
20140904-PurClathDigest-1ug-01	1235	1228	15.426	0.62004	156.18	246160	5660600	0	-5.3024	1	9.62	30.07	30.07	193	189	1.899	0	1.899	0	0	0	0		NaN	NaN	NaN	NaN
20140904-PurClathDigest-1ug-01	1236	1229	15.436	0.62016	156.45	234110	5417200	0	-5.3024	1	9.645	30.08	30.08	192.3	188.3	1.898	0	1.898	0	0	0	0		NaN	NaN	NaN	NaN
20140904-PurClathDigest-1ug-01	1237	1230	15.447	0.6197	157.82	234680	5461700	0	-5.3024	1	9.67	30.09	30.09	191.6	187.6	1.897	0	1.897	0	0	0	0		NaN	NaN	NaN	NaN
20140904-PurClathDigest-1ug-01	1238	1231	15.457	0.60013	141.71	238430	5810400	0	-5.3024	1	9.692	30.13	30.13	190.9	186.8	1.897	0	1.897	0	0	0	0		NaN	NaN	NaN	NaN
20140904-PurClathDigest-1ug-01	1239	1232	15.467	0.5999	142.77	239830	5701500	0	-5.3024	1	9.711	30.19	30.19	190.2	186.1	1.897	0	1.897	0	0	0	0		NaN	NaN	NaN	NaN
20140904-PurClathDigest-1ug-01	1240	1233	15.477	0.63967	174.44	238460	5115400	0	-5.3024	1	9.731	30.25	30.25	189.5	185.4	1.898	0	1.898	0	0	0	0		NaN	NaN	NaN	NaN
20140904-PurClathDigest-1ug-01	1241	1234	15.488	0.61031	155.11	294550	4307000	0	-5.3024	1	9.752	30.32	30.32	188.7	184.6	1.898	0	1.898	0	0	0	0		NaN	NaN	NaN	NaN
20140904-PurClathDigest-1ug-01	1242	1235	15.498	0.62004	152.76	263740	5640700	0	-5.3024	1	9.772	30.38	30.38	188	183.9	1.898	0	1.898	0	0	0	0		NaN	NaN	NaN	NaN
20140904-PurClathDigest-1ug-01	1243	1236	15.508	0.63	175.02	205430	4885600	0	-5.3024	1	9.792	30.44	30.44	187.2	183.1	1.898	0	1.898	0	0	0	0		NaN	NaN	NaN	NaN
20140904-PurClathDigest-1ug-01	1244	1237	15.519	0.6201	164.98	249380	5475900	0	-5.3024	1	9.812	30.5	30.5	186.5	182.4	1.899	0	1.899	0	0	0	0		NaN	NaN	NaN	NaN
20140904-PurClathDigest-1ug-01	1245	1238	15.529	0.73986	282.77	286220	3605500	0	-5.3024	1	9.832	30.57	30.57	185.7	181.7	1.899	0	1.899	0	0	0	0		NaN	NaN	NaN	NaN
20140904-PurClathDigest-1ug-01	1246	1239	15.541	0.61003	149.22	248280	5597100	0	-5.3024	1	9.857	30.64	30.64	184.8	180.8	1.899	0	1.899	0	0	0	0		NaN	NaN	NaN	NaN
20140904-PurClathDigest-1ug-01	1247	1240	15.551	0.61998	162.76	242650	5329200	0	-5.3024	1	9.876	30.7	30.7	184.1	180	1.9	0	1.9	0	0	0	0		NaN	NaN	NaN	NaN
20140904-PurClathDigest-1ug-01	1248	1241	15.562	0.63011	172.47	213940	4912500	0	-5.3024	1	9.897	30.76	30.76	183.4	179.3	1.9	0	1.9	0	0	0	0		NaN	NaN	NaN	NaN
20140904-PurClathDigest-1ug-01	1249	1242	15.572	0.63	164.61	298720	4265500	0	-5.3024	1	9.917	30.83	30.83	182.6	178.5	1.9	0	1.9	0	0	0	0		NaN	NaN	NaN	NaN
20140904-PurClathDigest-1ug-01	1250	1243	15.583	0.63	164.28	240990	5412100	0	-5.3024	1	9.938	30.89	30.89	181.9	177.8	1.9	0	1.9	0	0	0	0		NaN	NaN	NaN	NaN
20140904-PurClathDigest-1ug-01	1251	1244	15.593	0.61003	147.02	231540	4985300	0	-5.3024	1	9.958	30.95	30.95	181.1	177	1.901	0	1.901	0	0	0	0		NaN	NaN	NaN	NaN
20140904-PurClathDigest-1ug-01	1252	1245	15.603	0.68985	235.28	201840	4130000	0	-5.3024	1	9.978	31.01	31.01	180.4	176.3	1.901	0	1.901	0	0	0	0		NaN	NaN	NaN	NaN
20140904-PurClathDigest-1ug-01	1253	1246	15.615	0.64001	173.41	212230	4948200	0	-5.3024	1	10	31.08	31.08	179.6	175.5	1.901	0	1.901	0	0	0	0		NaN	NaN	NaN	NaN
20140904-PurClathDigest-1ug-01	1254	1247	15.626	0.61003	151.79	237710	5407800	0	-5.3024	1	10.02	31.15	31.15	178.8	174.7	1.901	0	1.901	0	0	0	0		NaN	NaN	NaN	NaN
20140904-PurClathDigest-1ug-01	1255	1248	15.636	0.66027	199.89	186660	4336200	0	-5.3024	1	10.04	31.21	31.21	178.1	174	1.902	0	1.902	0	0	0	0		NaN	NaN	NaN	NaN
20140904-PurClathDigest-1ug-01	1256	1249	15.647	0.63984	177.05	220250	4936100	0	-5.3024	1	10.06	31.27	31.27	177.3	173.2	1.902	0	1.902	0	0	0	0		NaN	NaN	NaN	NaN
20140904-PurClathDigest-1ug-01	1257	1250	15.657	0.61987	160.47	211210	5033600	0	-5.3024	1	10.08	31.34	31.34	176.5	172.4	1.902	0	1.902	0	0	0	0		NaN	NaN	NaN	NaN
20140904-PurClathDigest-1ug-01	1258	1251	15.668	0.6601	205.87	195540	4475600	0	-5.3024	1	10.1	31.4	31.4	175.8	171.7	1.903	0	1.903	0	0	0	0		NaN	NaN	NaN	NaN
20140904-PurClathDigest-1ug-01	1259	1252	15.679	0.6399	184.89	200060	4647400	0	-5.3024	1	10.13	31.47	31.47	175	170.9	1.903	0	1.903	0	0	0	0		NaN	NaN	NaN	NaN
20140904-PurClathDigest-1ug-01	1260	1253	15.689	0.6201	163.92	226730	4512900	0	-5.3024	1	10.15	31.53	31.53	174.2	170.1	1.903	0	1.903	0	0	0	0		NaN	NaN	NaN	NaN
20140904-PurClathDigest-1ug-01	1261	1254	15.7	0.62994	169.2	215590	4838500	0	-5.3024	1	10.17	31.59	31.59	173.5	169.4	1.903	0	1.903	0	0	0	0		NaN	NaN	NaN	NaN
20140904-PurClathDigest-1ug-01	1262	1255	15.71	0.64007	183.69	194660	4574100	0	-5.3024	1	10.19	31.66	31.66	172.7	168.6	1.904	0	1.904	0	0	0	0		NaN	NaN	NaN	NaN
20140904-PurClathDigest-1ug-01	1263	1256	15.721	0.68024	219.08	189510	3879800	0	-5.3024	1	10.21	31.72	31.72	171.9	167.9	1.904	0	1.904	0	0	0	0		NaN	NaN	NaN	NaN
20140904-PurClathDigest-1ug-01	1264	1257	15.732	0.66977	211.34	204150	4053200	0	-5.3024	1	10.23	31.79	31.79	171.1	167.1	1.904	0	1.904	0	0	0	0		NaN	NaN	NaN	NaN
20140904-PurClathDigest-1ug-01	1265	1258	15.743	0.64001	181.45	211870	4701800	0	-5.3024	1	10.25	31.86	31.86	170.3	166.3	1.905	0	1.905	0	0	0	0		NaN	NaN	NaN	NaN
20140904-PurClathDigest-1ug-01	1266	1259	15.754	0.65998	191.88	203050	4445800	0	-5.3024	1	10.27	31.98	31.98	169.5	165.5	1.905	0	1.905	0	0	0	0		NaN	NaN	NaN	NaN
20140904-PurClathDigest-1ug-01	1267	1260	15.765	0.66004	203.43	244650	3520000	0	-5.3024	1	10.3	32.21	32.21	168.7	164.6	1.905	0	1.905	0	0	0	0		NaN	NaN	NaN	NaN
20140904-PurClathDigest-1ug-01	1268	1261	15.776	0.72001	255.43	206890	3204900	0	-5.3024	1	10.32	32.45	32.45	167.8	163.7	1.905	0	1.905	0	0	0	0		NaN	NaN	NaN	NaN
20140904-PurClathDigest-1ug-01	1269	1262	15.788	0.76996	311.76	169760	3089500	0	-5.3024	1	10.35	32.7	32.7	166.8	162.8	1.905	0	1.905	0	0	0	0		NaN	NaN	NaN	NaN
20140904-PurClathDigest-1ug-01	1270	1263	15.801	0.63	170.47	233270	4934400	0	-5.3024	1	10.38	32.97	32.97	165.8	161.7	1.905	0	1.905	0	0	0	0		NaN	NaN	NaN	NaN
20140904-PurClathDigest-1ug-01	1271	1264	15.811	0.65002	184.62	214320	4638300	0	-5.3024	1	10.4	33.19	33.19	165	160.9	1.905	0	1.905	0	0	0	0		NaN	NaN	NaN	NaN
20140904-PurClathDigest-1ug-01	1272	1265	15.822	0.62988	173.15	242040	4834100	0	-5.3024	1	10.43	33.42	33.42	164.1	160	1.905	0	1.905	0	0	0	0		NaN	NaN	NaN	NaN
20140904-PurClathDigest-1ug-01	1273	1266	15.833	0.91999	464.92	190380	2318200	0	-5.3024	1	10.45	33.64	33.64	163.3	159.2	1.905	0	1.905	0	0	0	0		NaN	NaN	NaN	NaN
20140904-PurClathDigest-1ug-01	1274	1267	15.848	0.80011	342.21	270960	2919500	0	-5.3024	1	10.48	33.96	33.96	162.1	158	1.905	0	1.905	0	0	0	0		NaN	NaN	NaN	NaN
20140904-PurClathDigest-1ug-01	1275	1268	15.861	0.8	344.91	188840	2820700	0	-5.3024	1	10.51	34.25	34.25	161	156.9	1.905	0	1.905	0	0	0	0		NaN	NaN	NaN	NaN
20140904-PurClathDigest-1ug-01	1276	1269	15.875	0.95993	500	149130	2154100	0	-5.3024	1	10.54	34.53	34.53	160	155.9	1.905	0	1.905	0	0	0	0		NaN	NaN	NaN	NaN
20140904-PurClathDigest-1ug-01	1277	1270	15.891	0.7501	285.97	218000	3023700	0	-5.3024	1	10.58	34.86	34.86	158.7	154.6	1.905	0	1.905	0	0	0	0		NaN	NaN	NaN	NaN
20140904-PurClathDigest-1ug-01	1278	1271	15.903	0.86987	412.54	174280	2487900	0	-5.3024	1	10.61	35.13	35.13	157.7	153.6	1.905	0	1.905	0	0	0	0		NaN	NaN	NaN	NaN
20140904-PurClathDigest-1ug-01	1279	1272	15.918	0.94013	471.76	133740	2248200	0	-5.3024	1	10.64	35.43	35.43	156.6	152.5	1.905	0	1.905	0	0	0	0		NaN	NaN	NaN	NaN
20140904-PurClathDigest-1ug-01	1280	1273	15.933	0.85018	388.34	200600	2574300	0	-5.3024	1	10.68	35.76	35.76	155.3	151.2	1.905	0	1.905	0	0	0	0		NaN	NaN	NaN	NaN
20140904-PurClathDigest-1ug-01	1281	1274	15.948	0.95982	500	133340	2104200	0	-5.3024	1	10.71	36.06	36.06	154.2	150.1	1.905	0	1.905	0	0	0	0		NaN	NaN	NaN	NaN
20140904-PurClathDigest-1ug-01	1282	1275	15.964	0.93996	481.94	149110	2199500	0	-5.3024	1	10.74	36.4	36.4	152.9	148.8	1.905	0	1.905	0	0	0	0		NaN	NaN	NaN	NaN
20140904-PurClathDigest-1ug-01	1283	1276	15.979	0.95003	483.58	132930	2117800	0	-5.3024	1	10.78	36.73	36.73	151.7	147.6	1.905	0	1.905	0	0	0	0		NaN	NaN	NaN	NaN
20140904-PurClathDigest-1ug-01	1284	1277	15.995	0.92983	473.14	133680	2176600	0	-5.3024	1	10.81	37.07	37.07	150.4	146.3	1.905	0	1.905	0	0	0	0		NaN	NaN	NaN	NaN
20140904-PurClathDigest-1ug-01	1285	1278	16.011	0.94002	484.03	147000	2168500	0	-5.3024	1	10.85	37.39	37.39	149.2	145.1	1.905	0	1.905	0	0	0	0		NaN	NaN	NaN	NaN
20140904-PurClathDigest-1ug-01	1286	1279	16.026	0.9201	454.4	170960	2296400	0	-5.3024	1	10.88	37.72	37.72	148	143.9	1.905	0	1.905	0	0	0	0		NaN	NaN	NaN	NaN
20140904-PurClathDigest-1ug-01	1287	1280	16.042	0.80006	334.37	203610	2707100	0	-5.3024	1	10.92	38.05	38.05	146.8	142.6	1.905	0	1.905	0	0	0	0		NaN	NaN	NaN	NaN
20140904-PurClathDigest-1ug-01	1288	1281	16.055	0.8099	354.24	174220	2566300	0	-5.3024	1	10.94	38.23	38.23	145.7	141.6	1.906	0	1.906	0	0	0	0		NaN	NaN	NaN	NaN
20140904-PurClathDigest-1ug-01	1289	1282	16.068	0.91999	461.48	145660	2220300	0	-5.3024	1	10.96	38.26	38.26	144.7	140.5	1.911	0	1.911	0	0	0	0		NaN	NaN	NaN	NaN
20140904-PurClathDigest-1ug-01	1290	1283	16.084	0.84011	382.61	174640	2483100	0	-5.3024	1	10.97	38.29	38.29	143.5	139.3	1.916	0	1.916	0	0	0	0		NaN	NaN	NaN	NaN
20140904-PurClathDigest-1ug-01	1291	1284	16.098	0.77991	316.96	205600	2769600	0	-5.3024	1	10.99	38.31	38.31	142.4	138.2	1.921	0	1.921	0	0	0	0		NaN	NaN	NaN	NaN
20140904-PurClathDigest-1ug-01	1292	1285	16.111	0.79994	341.77	194570	2633800	0	-5.3024	1	11	38.34	38.34	141.4	137.2	1.926	0	1.926	0	0	0	0		NaN	NaN	NaN	NaN
20140904-PurClathDigest-1ug-01	1293	1286	16.124	0.84011	385.63	251570	2629900	0	-5.3024	1	11.01	38.36	38.36	140.4	136.2	1.93	0	1.93	0	0	0	0		NaN	NaN	NaN	NaN
20140904-PurClathDigest-1ug-01	1294	1287	16.138	0.94997	483.83	159220	2147200	0	-5.3024	1	11.03	38.39	38.39	139.3	135.1	1.935	0	1.935	0	0	0	0		NaN	NaN	NaN	NaN
20140904-PurClathDigest-1ug-01	1295	1288	16.154	0.78003	315.92	195590	2703600	0	-5.3024	1	11.04	38.42	38.42	138.1	133.9	1.94	0	1.94	0	0	0	0		NaN	NaN	NaN	NaN
20140904-PurClathDigest-1ug-01	1296	1289	16.167	0.89985	442.2	165550	2304500	0	-5.3024	1	11.06	38.44	38.44	137.1	132.9	1.945	0	1.945	0	0	0	0		NaN	NaN	NaN	NaN
20140904-PurClathDigest-1ug-01	1297	1290	16.182	0.76	299.46	205460	2814000	0	-5.3024	1	11.07	38.47	38.47	135.9	131.7	1.95	0	1.95	0	0	0	0		NaN	NaN	NaN	NaN
20140904-PurClathDigest-1ug-01	1298	1291	16.195	0.93018	469.56	160670	2141500	0	-5.3024	1	11.09	38.49	38.49	134.9	130.7	1.954	0	1.954	0	0	0	0		NaN	NaN	NaN	NaN
20140904-PurClathDigest-1ug-01	1299	1292	16.21	0.95993	500	146090	2028000	0	-5.3024	1	11.1	38.52	38.52	133.7	129.5	1.96	0	1.96	0	0	0	0		NaN	NaN	NaN	NaN
20140904-PurClathDigest-1ug-01	1300	1293	16.226	0.88005	423.35	188910	2329900	0	-5.3024	1	11.12	38.55	38.55	132.5	128.2	1.965	0	1.965	0	0	0	0		NaN	NaN	NaN	NaN
20140904-PurClathDigest-1ug-01	1301	1294	16.241	0.97984	500	154710	2012900	0	-5.3024	1	11.13	38.58	38.58	131.4	127.1	1.97	0	1.97	0	0	0	0		NaN	NaN	NaN	NaN
20140904-PurClathDigest-1ug-01	1302	1295	16.257	0.89012	427.9	177140	2255000	0	-5.3024	1	11.15	38.61	38.61	130.1	125.8	1.976	0	1.976	0	0	0	0		NaN	NaN	NaN	NaN
20140904-PurClathDigest-1ug-01	1303	1296	16.272	0.82008	351.33	212620	2612000	0	-5.3024	1	11.16	38.64	38.64	129	124.7	1.981	0	1.981	0	0	0	0		NaN	NaN	NaN	NaN
20140904-PurClathDigest-1ug-01	1304	1297	16.286	0.89996	435.91	171260	2248900	0	-5.3024	1	11.18	38.66	38.66	127.9	123.6	1.986	0	1.986	0	0	0	0		NaN	NaN	NaN	NaN
20140904-PurClathDigest-1ug-01	1305	1298	16.301	0.95993	500	183940	2074200	0	-5.3024	1	11.19	38.69	38.69	126.8	122.4	1.991	0	1.991	0	0	0	0		NaN	NaN	NaN	NaN
20140904-PurClathDigest-1ug-01	1306	1299	16.317	0.86002	397.28	186360	2274400	0	-5.3024	1	11.21	38.72	38.72	125.5	121.2	1.996	0	1.996	0	0	0	0		NaN	NaN	NaN	NaN
20140904-PurClathDigest-1ug-01	1307	1300	16.331	0.95993	500	151120	1975500	0	-5.3024	1	11.22	38.75	38.75	124.4	120.1	2.001	0	2.001	0	0	0	0		NaN	NaN	NaN	NaN
20140904-PurClathDigest-1ug-01	1308	1301	16.347	0.89001	426.75	171730	2190600	0	-5.3024	1	11.24	38.78	38.78	123.2	118.8	2.007	0	2.007	0	0	0	0		NaN	NaN	NaN	NaN
20140904-PurClathDigest-1ug-01	1309	1302	16.362	0.95009	495.91	156620	2023500	0	-5.3024	1	11.28	38.9	38.9	122	117.6	2.003	0	2.003	0	0	0	0		NaN	NaN	NaN	NaN
20140904-PurClathDigest-1ug-01	1310	1303	16.378	0.9399	476.62	178610	2068100	0	-5.3024	1	11.34	39.07	39.07	120.7	116.4	1.996	0	1.996	0	0	0	0		NaN	NaN	NaN	NaN
20140904-PurClathDigest-1ug-01	1311	1304	16.393	0.89001	428.29	209330	2296300	0	-5.3024	1	11.39	39.23	39.23	119.5	115.1	1.988	0	1.988	0	0	0	0		NaN	NaN	NaN	NaN
20140904-PurClathDigest-1ug-01	1312	1305	16.408	0.9201	435.99	200190	2277600	0	-5.3024	1	11.44	39.39	39.39	118.3	113.9	1.982	0	1.982	0	0	0	0		NaN	NaN	NaN	NaN
20140904-PurClathDigest-1ug-01	1313	1306	16.423	0.84	379.34	223660	2501900	0	-5.3024	1	11.5	39.55	39.55	117	112.7	1.975	0	1.975	0	0	0	0		NaN	NaN	NaN	NaN
20140904-PurClathDigest-1ug-01	1314	1307	16.437	0.86002	396.68	183080	2268500	0	-5.3024	1	11.54	39.69	39.69	115.9	111.6	1.969	0	1.969	0	0	0	0		NaN	NaN	NaN	NaN
20140904-PurClathDigest-1ug-01	1315	1308	16.452	0.95982	500	155520	1961400	0	-5.3024	1	11.59	39.84	39.84	114.8	110.4	1.962	0	1.962	0	0	0	0		NaN	NaN	NaN	NaN
20140904-PurClathDigest-1ug-01	1316	1309	16.468	0.96016	500	149240	1918300	0	-5.3024	1	11.65	40.01	40.01	113.5	109.1	1.955	0	1.955	0	0	0	0		NaN	NaN	NaN	NaN
20140904-PurClathDigest-1ug-01	1317	1310	16.484	0.88989	430.89	160580	2084600	0	-5.3024	1	11.7	40.17	40.17	112.2	107.9	1.948	0	1.948	0	0	0	0		NaN	NaN	NaN	NaN
20140904-PurClathDigest-1ug-01	1318	1311	16.499	0.88005	418.64	174170	2160700	0	-5.3024	1	11.76	40.33	40.33	111	106.7	1.941	0	1.941	0	0	0	0		NaN	NaN	NaN	NaN
20140904-PurClathDigest-1ug-01	1319	1312	16.513	0.95993	496.3	159490	1939900	0	-5.3024	1	11.81	40.48	40.48	109.8	105.5	1.935	0	1.935	0	0	0	0		NaN	NaN	NaN	NaN
20140904-PurClathDigest-1ug-01	1320	1313	16.529	0.83004	369.28	226830	2393500	0	-5.3024	1	11.86	40.64	40.64	108.5	104.2	1.927	0	1.927	0	0	0	0		NaN	NaN	NaN	NaN
20140904-PurClathDigest-1ug-01	1321	1314	16.543	0.91999	463.44	179420	2056300	0	-5.3024	1	11.91	40.79	40.79	107.4	103.1	1.921	0	1.921	0	0	0	0		NaN	NaN	NaN	NaN
20140904-PurClathDigest-1ug-01	1322	1315	16.558	0.86014	398.48	234330	2305700	0	-5.3024	1	11.96	40.95	40.95	106.2	101.9	1.914	0	1.914	0	0	0	0		NaN	NaN	NaN	NaN
20140904-PurClathDigest-1ug-01	1323	1316	16.573	0.85991	384.96	192690	2254300	0	-5.3024	1	12.01	41.1	41.1	105	100.7	1.908	0	1.908	0	0	0	0		NaN	NaN	NaN	NaN
20140904-PurClathDigest-1ug-01	1324	1317	16.587	0.88989	433.7	161810	2029400	0	-5.3024	1	12.06	41.25	41.25	103.9	99.56	1.901	0	1.901	0	0	0	0		NaN	NaN	NaN	NaN
20140904-PurClathDigest-1ug-01	1325	1318	16.602	0.96004	498.21	158110	1897200	0	-5.3024	1	12.11	41.4	41.4	102.7	98.37	1.895	0	1.895	0	0	0	0		NaN	NaN	NaN	NaN
20140904-PurClathDigest-1ug-01	1326	1319	16.618	0.97012	500	177560	1927400	0	-5.3024	1	12.17	41.57	41.57	101.4	97.08	1.887	0	1.887	0	0	0	0		NaN	NaN	NaN	NaN
20140904-PurClathDigest-1ug-01	1327	1320	16.634	0.81997	365	235550	2398700	0	-5.3024	1	12.22	41.73	41.73	100.1	95.79	1.88	0	1.88	0	0	0	0		NaN	NaN	NaN	NaN
20140904-PurClathDigest-1ug-01	1328	1321	16.648	0.77991	319.17	239890	2584900	0	-5.3024	1	12.27	41.88	41.88	98.98	94.69	1.874	0	1.874	0	0	0	0		NaN	NaN	NaN	NaN
20140904-PurClathDigest-1ug-01	1329	1322	16.661	0.91003	446.86	189880	2015400	0	-5.3024	1	12.31	42.28	42.28	98.04	93.75	1.87	0	1.87	0	0	0	0		NaN	NaN	NaN	NaN
20140904-PurClathDigest-1ug-01	1330	1323	16.676	0.90992	454.52	174140	1995300	0	-5.3024	1	12.36	42.81	42.81	96.96	92.69	1.866	0	1.866	0	0	0	0		NaN	NaN	NaN	NaN
20140904-PurClathDigest-1ug-01	1331	1324	16.691	0.87021	412.14	187950	2150100	0	-5.3024	1	12.41	43.34	43.34	95.89	91.62	1.862	0	1.862	0	0	0	0		NaN	NaN	NaN	NaN
20140904-PurClathDigest-1ug-01	1332	1325	16.706	0.95993	500	157850	1861100	0	-5.3024	1	12.45	43.84	43.84	94.86	90.6	1.858	0	1.858	0	0	0	0		NaN	NaN	NaN	NaN
20140904-PurClathDigest-1ug-01	1333	1326	16.722	0.85991	402.97	221880	2231100	0	-5.3024	1	12.51	44.4	44.4	93.72	89.47	1.854	0	1.854	0	0	0	0		NaN	NaN	NaN	NaN
20140904-PurClathDigest-1ug-01	1334	1327	16.736	0.89996	442.31	205300	2078700	0	-5.3024	1	12.55	44.91	44.91	92.7	88.46	1.85	0	1.85	0	0	0	0		NaN	NaN	NaN	NaN
20140904-PurClathDigest-1ug-01	1335	1328	16.751	0.94013	477.88	156700	1897600	0	-5.3024	1	12.6	45.43	45.43	91.64	87.41	1.846	0	1.846	0	0	0	0		NaN	NaN	NaN	NaN
20140904-PurClathDigest-1ug-01	1336	1329	16.767	0.96004	500	165280	1826200	0	-5.3024	1	12.65	45.98	45.98	90.53	86.3	1.842	0	1.842	0	0	0	0		NaN	NaN	NaN	NaN
20140904-PurClathDigest-1ug-01	1337	1330	16.783	0.90992	447.61	199140	2080900	0	-5.3024	1	12.7	46.54	46.54	89.39	85.18	1.838	0	1.838	0	0	0	0		NaN	NaN	NaN	NaN
20140904-PurClathDigest-1ug-01	1338	1331	16.798	0.89001	426.51	205610	2093400	0	-5.3024	1	12.75	47.07	47.07	88.32	84.11	1.834	0	1.834	0	0	0	0		NaN	NaN	NaN	NaN
20140904-PurClathDigest-1ug-01	1339	1332	16.813	0.95993	500	175560	1882500	0	-5.3024	1	12.8	47.59	47.59	87.26	83.06	1.83	0	1.83	0	0	0	0		NaN	NaN	NaN	NaN
20140904-PurClathDigest-1ug-01	1340	1333	16.829	0.94002	480.27	180910	1935100	0	-5.3024	1	12.85	48.15	48.15	86.13	81.94	1.826	0	1.826	0	0	0	0		NaN	NaN	NaN	NaN
20140904-PurClathDigest-1ug-01	1341	1334	16.844	0.9502	491.01	158440	1821400	0	-5.3024	1	12.9	48.7	48.7	85.02	80.83	1.822	0	1.822	0	0	0	0		NaN	NaN	NaN	NaN
20140904-PurClathDigest-1ug-01	1342	1335	16.86	0.88978	435.96	199400	2038400	0	-5.3024	1	12.95	49.25	49.25	83.89	79.72	1.817	0	1.817	0	0	0	0		NaN	NaN	NaN	NaN
20140904-PurClathDigest-1ug-01	1343	1336	16.875	0.96016	500	166860	1823700	0	-5.3024	1	13	49.77	49.77	82.84	78.68	1.814	0	1.814	0	0	0	0		NaN	NaN	NaN	NaN
20140904-PurClathDigest-1ug-01	1344	1337	16.891	0.95993	500	175270	1828700	0	-5.3024	1	13.05	50.33	50.33	81.7	77.55	1.809	0	1.809	0	0	0	0		NaN	NaN	NaN	NaN
20140904-PurClathDigest-1ug-01	1345	1338	16.907	0.96004	500	166660	1824700	0	-5.3024	1	13.1	50.89	50.89	80.57	76.42	1.805	0	1.805	0	0	0	0		NaN	NaN	NaN	NaN
20140904-PurClathDigest-1ug-01	1346	1339	16.923	0.92995	465.65	178020	1913800	0	-5.3024	1	13.15	51.45	51.45	79.43	75.3	1.801	0	1.801	0	0	0	0		NaN	NaN	NaN	NaN
20140904-PurClathDigest-1ug-01	1347	1340	16.938	0.90958	438.97	224420	2092800	0	-5.3024	1	13.2	52	52	78.33	74.21	1.797	0	1.797	0	0	0	0		NaN	NaN	NaN	NaN
20140904-PurClathDigest-1ug-01	1348	1341	16.954	0.8503	395.52	232410	2232600	0	-5.3024	1	13.24	52.48	52.48	77.4	73.28	1.793	0	1.793	0	0	0	0		NaN	NaN	NaN	NaN
20140904-PurClathDigest-1ug-01	1349	1342	16.968	0.86002	393.25	220780	2233200	0	-5.3024	1	13.25	52.79	52.79	76.95	72.84	1.793	0	1.793	0	0	0	0		NaN	NaN	NaN	NaN
20140904-PurClathDigest-1ug-01	1350	1343	16.982	0.88017	419.42	205960	2062600	0	-5.3024	1	13.26	53.1	53.1	76.5	72.39	1.792	0	1.792	0	0	0	0		NaN	NaN	NaN	NaN
20140904-PurClathDigest-1ug-01	1351	1344	16.997	0.89001	435.62	197950	1974000	0	-5.3024	1	13.27	53.42	53.42	76.04	71.94	1.791	0	1.791	0	0	0	0		NaN	NaN	NaN	NaN
20140904-PurClathDigest-1ug-01	1352	1345	17.012	0.95982	500	176310	1833700	0	-5.3024	1	13.27	53.75	53.75	75.58	71.48	1.79	0	1.79	0	0	0	0		NaN	NaN	NaN	NaN
20140904-PurClathDigest-1ug-01	1353	1346	17.028	0.95009	490.16	173280	1819700	0	-5.3024	1	13.28	54.1	54.1	75.07	70.98	1.79	0	1.79	0	0	0	0		NaN	NaN	NaN	NaN
20140904-PurClathDigest-1ug-01	1354	1347	17.043	0.96004	500	187470	1874200	0	-5.3024	1	13.29	54.44	54.44	74.58	70.49	1.789	0	1.789	0	0	0	0		NaN	NaN	NaN	NaN
20140904-PurClathDigest-1ug-01	1355	1348	17.059	0.88989	423.44	224150	2110100	0	-5.3024	1	13.3	54.79	54.79	74.08	69.99	1.788	0	1.788	0	0	0	0		NaN	NaN	NaN	NaN
20140904-PurClathDigest-1ug-01	1356	1349	17.074	0.84	382.98	235760	2240400	0	-5.3024	1	13.31	55.12	55.12	73.61	69.53	1.787	0	1.787	0	0	0	0		NaN	NaN	NaN	NaN
20140904-PurClathDigest-1ug-01	1357	1350	17.088	0.94997	489.14	189910	1881600	0	-5.3024	1	13.31	55.43	55.43	73.17	69.09	1.786	0	1.786	0	0	0	0		NaN	NaN	NaN	NaN
20140904-PurClathDigest-1ug-01	1358	1351	17.104	0.93018	456.08	213930	2030700	0	-5.3024	1	13.32	55.77	55.77	72.67	68.6	1.785	0	1.785	0	0	0	0		NaN	NaN	NaN	NaN
20140904-PurClathDigest-1ug-01	1359	1352	17.12	0.90992	449.44	230490	2103800	0	-5.3024	1	13.33	56.11	56.11	72.19	68.12	1.785	0	1.785	0	0	0	0		NaN	NaN	NaN	NaN
20140904-PurClathDigest-1ug-01	1360	1353	17.135	0.86002	397.06	237030	2214200	0	-5.3024	1	13.34	56.44	56.44	71.71	67.65	1.784	0	1.784	0	0	0	0		NaN	NaN	NaN	NaN
20140904-PurClathDigest-1ug-01	1361	1354	17.149	0.88028	419.54	320170	2412000	0	-5.3024	1	13.34	56.76	56.76	71.26	67.2	1.783	0	1.783	0	0	0	0		NaN	NaN	NaN	NaN
20140904-PurClathDigest-1ug-01	1362	1355	17.164	0.8297	371.53	251030	2352100	0	-5.3024	1	13.35	57.08	57.08	70.8	66.75	1.782	0	1.782	0	0	0	0		NaN	NaN	NaN	NaN
20140904-PurClathDigest-1ug-01	1363	1356	17.178	0.84995	394.55	244150	2240100	0	-5.3024	1	13.36	57.38	57.38	70.37	66.32	1.782	0	1.782	0	0	0	0		NaN	NaN	NaN	NaN
20140904-PurClathDigest-1ug-01	1364	1357	17.192	0.89996	438.4	219770	2144600	0	-5.3024	1	13.37	57.69	57.69	69.92	65.87	1.781	0	1.781	0	0	0	0		NaN	NaN	NaN	NaN
20140904-PurClathDigest-1ug-01	1365	1358	17.207	0.88017	419.01	229380	2150600	0	-5.3024	1	13.37	58.02	58.02	69.45	65.41	1.78	0	1.78	0	0	0	0		NaN	NaN	NaN	NaN
20140904-PurClathDigest-1ug-01	1366	1359	17.221	0.92983	469.03	193090	1893400	0	-5.3024	1	13.38	58.34	58.34	68.99	64.95	1.779	0	1.779	0	0	0	0		NaN	NaN	NaN	NaN
20140904-PurClathDigest-1ug-01	1367	1360	17.237	0.86002	393.83	245110	2223200	0	-5.3024	1	13.39	58.68	58.68	68.51	64.47	1.778	0	1.778	0	0	0	0		NaN	NaN	NaN	NaN
20140904-PurClathDigest-1ug-01	1368	1361	17.251	0.96016	500	175380	1776100	0	-5.3024	1	13.4	58.98	58.98	68.07	64.04	1.778	0	1.778	0	0	0	0		NaN	NaN	NaN	NaN
20140904-PurClathDigest-1ug-01	1369	1362	17.267	0.9399	481.28	204310	1975200	0	-5.3024	1	13.41	59.26	59.26	67.73	63.71	1.777	0	1.777	0	0	0	0		NaN	NaN	NaN	NaN
20140904-PurClathDigest-1ug-01	1370	1363	17.283	0.90008	440.22	220610	2041100	0	-5.3024	1	13.42	59.53	59.53	67.4	63.38	1.776	0	1.776	0	0	0	0		NaN	NaN	NaN	NaN
20140904-PurClathDigest-1ug-01	1371	1364	17.298	0.81997	358.23	333510	2614400	0	-5.3024	1	13.43	59.79	59.79	67.09	63.07	1.775	0	1.775	0	0	0	0		NaN	NaN	NaN	NaN
20140904-PurClathDigest-1ug-01	1372	1365	17.312	0.78987	329.74	275480	2584300	0	-5.3024	1	13.44	60.03	60.03	66.8	62.78	1.775	0	1.775	0	0	0	0		NaN	NaN	NaN	NaN
20140904-PurClathDigest-1ug-01	1373	1366	17.325	0.96004	500	190070	1810300	0	-5.3024	1	13.45	60.25	60.25	66.52	62.51	1.774	0	1.774	0	0	0	0		NaN	NaN	NaN	NaN
20140904-PurClathDigest-1ug-01	1374	1367	17.341	0.9502	495.55	175200	1769200	0	-5.3024	1	13.46	60.53	60.53	66.18	62.18	1.773	0	1.773	0	0	0	0		NaN	NaN	NaN	NaN
20140904-PurClathDigest-1ug-01	1375	1368	17.357	0.95982	500	178980	1789800	0	-5.3024	1	13.47	60.8	60.8	65.85	61.85	1.772	0	1.772	0	0	0	0		NaN	NaN	NaN	NaN
20140904-PurClathDigest-1ug-01	1376	1369	17.373	0.95993	500	180140	1777700	0	-5.3024	1	13.48	61.08	61.08	65.51	61.52	1.771	0	1.771	0	0	0	0		NaN	NaN	NaN	NaN
20140904-PurClathDigest-1ug-01	1377	1370	17.389	0.95009	487.74	177000	1797600	0	-5.3024	1	13.49	61.36	61.36	65.17	61.18	1.77	0	1.77	0	0	0	0		NaN	NaN	NaN	NaN
20140904-PurClathDigest-1ug-01	1378	1371	17.404	0.97984	500	180200	1783300	0	-5.3024	1	13.5	61.63	61.63	64.84	60.85	1.77	0	1.77	0	0	0	0		NaN	NaN	NaN	NaN
20140904-PurClathDigest-1ug-01	1379	1372	17.421	0.96016	500	184270	1797000	0	-5.3024	1	13.51	61.91	61.91	64.5	60.51	1.769	0	1.769	0	0	0	0		NaN	NaN	NaN	NaN
20140904-PurClathDigest-1ug-01	1380	1373	17.437	0.90008	444.77	206500	1942900	0	-5.3024	1	13.53	62.19	62.19	64.16	60.18	1.768	0	1.768	0	0	0	0		NaN	NaN	NaN	NaN
20140904-PurClathDigest-1ug-01	1381	1374	17.452	0.88989	435.49	202720	1953900	0	-5.3024	1	13.54	62.45	62.45	63.84	59.87	1.767	0	1.767	0	0	0	0		NaN	NaN	NaN	NaN
20140904-PurClathDigest-1ug-01	1382	1375	17.467	0.96004	500	195920	1851700	0	-5.3024	1	13.55	62.7	62.7	63.53	59.56	1.766	0	1.766	0	0	0	0		NaN	NaN	NaN	NaN
20140904-PurClathDigest-1ug-01	1383	1376	17.483	0.87021	402.29	280360	2366100	0	-5.3024	1	13.56	62.98	62.98	63.19	59.23	1.765	0	1.765	0	0	0	0		NaN	NaN	NaN	NaN
20140904-PurClathDigest-1ug-01	1384	1377	17.497	0.93979	481.94	200170	1934200	0	-5.3024	1	13.57	63.23	63.23	62.89	58.93	1.765	0	1.765	0	0	0	0		NaN	NaN	NaN	NaN
20140904-PurClathDigest-1ug-01	1385	1378	17.513	0.89996	436.01	228060	1990300	0	-5.3024	1	13.58	63.5	63.5	62.56	58.6	1.764	0	1.764	0	0	0	0		NaN	NaN	NaN	NaN
20140904-PurClathDigest-1ug-01	1386	1379	17.528	0.96004	500	183030	1775100	0	-5.3024	1	13.59	63.76	63.76	62.24	58.29	1.763	0	1.763	0	0	0	0		NaN	NaN	NaN	NaN
20140904-PurClathDigest-1ug-01	1387	1380	17.544	0.94002	478.79	194470	1838000	0	-5.3024	1	13.6	64.04	64.04	61.9	57.96	1.762	0	1.762	0	0	0	0		NaN	NaN	NaN	NaN
20140904-PurClathDigest-1ug-01	1388	1381	17.559	0.96004	500	200480	1806100	0	-5.3024	1	13.6	64.09	64.09	61.62	57.67	1.763	0	1.763	0	0	0	0		NaN	NaN	NaN	NaN
20140904-PurClathDigest-1ug-01	1389	1382	17.575	0.91988	459.38	202180	1940000	0	-5.3024	1	13.58	63.99	63.99	61.38	57.42	1.765	0	1.765	0	0	0	0		NaN	NaN	NaN	NaN
20140904-PurClathDigest-1ug-01	1390	1383	17.591	0.96004	500	210330	1864900	0	-5.3024	1	13.57	63.9	63.9	61.14	57.17	1.766	0	1.766	0	0	0	0		NaN	NaN	NaN	NaN
20140904-PurClathDigest-1ug-01	1391	1384	17.607	0.89001	424.34	245840	2144100	0	-5.3024	1	13.56	63.8	63.8	60.89	56.91	1.768	0	1.768	0	0	0	0		NaN	NaN	NaN	NaN
20140904-PurClathDigest-1ug-01	1392	1385	17.622	0.96016	500	202780	1871900	0	-5.3024	1	13.55	63.71	63.71	60.66	56.67	1.769	0	1.769	0	0	0	0		NaN	NaN	NaN	NaN
20140904-PurClathDigest-1ug-01	1393	1386	17.638	0.9399	484.64	195810	1856300	0	-5.3024	1	13.54	63.61	63.61	60.42	56.41	1.771	0	1.771	0	0	0	0		NaN	NaN	NaN	NaN
20140904-PurClathDigest-1ug-01	1394	1387	17.653	0.96989	500	192490	1816700	0	-5.3024	1	13.53	63.51	63.51	60.17	56.16	1.773	0	1.773	0	0	0	0		NaN	NaN	NaN	NaN
20140904-PurClathDigest-1ug-01	1395	1388	17.669	0.93006	471.01	199050	1863500	0	-5.3024	1	13.52	63.41	63.41	59.93	55.9	1.775	0	1.775	0	0	0	0		NaN	NaN	NaN	NaN
20140904-PurClathDigest-1ug-01	1396	1389	17.685	0.88005	423.25	231350	2064700	0	-5.3024	1	13.5	63.32	63.32	59.69	55.65	1.776	0	1.776	0	0	0	0		NaN	NaN	NaN	NaN
20140904-PurClathDigest-1ug-01	1397	1390	17.7	0.95993	500	187460	1769600	0	-5.3024	1	13.49	63.23	63.23	59.46	55.41	1.778	0	1.778	0	0	0	0		NaN	NaN	NaN	NaN
20140904-PurClathDigest-1ug-01	1398	1391	17.716	0.95993	500	193760	1833300	0	-5.3024	1	13.48	63.13	63.13	59.21	55.15	1.779	0	1.779	0	0	0	0		NaN	NaN	NaN	NaN
20140904-PurClathDigest-1ug-01	1399	1392	17.732	0.96016	500	190200	1797900	0	-5.3024	1	13.47	63.03	63.03	58.96	54.9	1.781	0	1.781	0	0	0	0		NaN	NaN	NaN	NaN
20140904-PurClathDigest-1ug-01	1400	1393	17.748	0.95993	500	193840	1832200	0	-5.3024	1	13.46	62.93	62.93	58.72	54.64	1.783	0	1.783	0	0	0	0		NaN	NaN	NaN	NaN
20140904-PurClathDigest-1ug-01	1401	1394	17.764	0.95993	500	192670	1778000	0	-5.3024	1	13.45	62.84	62.84	58.47	54.38	1.785	0	1.785	0	0	0	0		NaN	NaN	NaN	NaN
20140904-PurClathDigest-1ug-01	1402	1395	17.78	0.93006	471.56	196340	1908700	0	-5.3024	1	13.44	62.74	62.74	58.22	54.12	1.786	0	1.786	0	0	0	0		NaN	NaN	NaN	NaN
20140904-PurClathDigest-1ug-01	1403	1396	17.795	0.94997	492.61	196560	1829400	0	-5.3024	1	13.42	62.64	62.64	57.98	53.87	1.788	0	1.788	0	0	0	0		NaN	NaN	NaN	NaN
20140904-PurClathDigest-1ug-01	1404	1397	17.811	0.96004	500	186520	1734900	0	-5.3024	1	13.41	62.54	62.54	57.74	53.62	1.79	0	1.79	0	0	0	0		NaN	NaN	NaN	NaN
20140904-PurClathDigest-1ug-01	1405	1398	17.827	0.97	500	192340	1744000	0	-5.3024	1	13.4	62.45	62.45	57.49	53.36	1.791	0	1.791	0	0	0	0		NaN	NaN	NaN	NaN
20140904-PurClathDigest-1ug-01	1406	1399	17.843	0.94997	487.49	201770	1845400	0	-5.3024	1	13.39	62.35	62.35	57.24	53.1	1.793	0	1.793	0	0	0	0		NaN	NaN	NaN	NaN
20140904-PurClathDigest-1ug-01	1407	1400	17.859	0.95993	500	184870	1742600	0	-5.3024	1	13.37	62.21	62.21	57.15	53	1.796	0	1.796	0	0	0	0		NaN	NaN	NaN	NaN
20140904-PurClathDigest-1ug-01	1408	1401	17.875	0.96016	500	207410	1896200	0	-5.3024	1	13.33	62.03	62.03	57.19	53.02	1.8	0	1.8	0	0	0	0		NaN	NaN	NaN	NaN
20140904-PurClathDigest-1ug-01	1409	1402	17.891	0.95993	500	200200	1871100	0	-5.3024	1	13.3	61.85	61.85	57.22	53.04	1.803	0	1.803	0	0	0	0		NaN	NaN	NaN	NaN
20140904-PurClathDigest-1ug-01	1410	1403	17.907	0.98007	500	188270	1818100	0	-5.3024	1	13.27	61.67	61.67	57.26	53.06	1.807	0	1.807	0	0	0	0		NaN	NaN	NaN	NaN
20140904-PurClathDigest-1ug-01	1411	1404	17.923	0.95982	500	194820	1767600	0	-5.3024	1	13.23	61.49	61.49	57.29	53.08	1.811	0	1.811	0	0	0	0		NaN	NaN	NaN	NaN
20140904-PurClathDigest-1ug-01	1412	1405	17.939	0.97	500	197800	1780500	0	-5.3024	1	13.2	61.31	61.31	57.33	53.11	1.815	0	1.815	0	0	0	0		NaN	NaN	NaN	NaN
20140904-PurClathDigest-1ug-01	1413	1406	17.955	0.96016	500	203510	1800900	0	-5.3024	1	13.17	61.13	61.13	57.36	53.13	1.819	0	1.819	0	0	0	0		NaN	NaN	NaN	NaN
20140904-PurClathDigest-1ug-01	1414	1407	17.971	0.95993	486.69	272460	2086300	0	-5.3024	1	13.13	60.95	60.95	57.4	53.15	1.823	0	1.823	0	0	0	0		NaN	NaN	NaN	NaN
20140904-PurClathDigest-1ug-01	1415	1408	17.987	0.93006	472.2	238860	2095600	0	-5.3024	1	13.1	60.78	60.78	57.43	53.17	1.826	0	1.826	0	0	0	0		NaN	NaN	NaN	NaN
20140904-PurClathDigest-1ug-01	1416	1409	18.003	0.95993	499.37	206910	1906100	0	-5.3024	1	13.07	60.6	60.6	57.46	53.19	1.83	0	1.83	0	0	0	0		NaN	NaN	NaN	NaN
20140904-PurClathDigest-1ug-01	1417	1410	18.019	0.96004	500	199260	1826900	0	-5.3024	1	13.04	60.42	60.42	57.5	53.22	1.834	0	1.834	0	0	0	0		NaN	NaN	NaN	NaN
20140904-PurClathDigest-1ug-01	1418	1411	18.035	0.96004	500	209270	1806200	0	-5.3024	1	13	60.25	60.25	57.53	53.24	1.838	0	1.838	0	0	0	0		NaN	NaN	NaN	NaN
20140904-PurClathDigest-1ug-01	1419	1412	18.051	0.95993	500	190500	1747600	0	-5.3024	1	12.97	60.07	60.07	57.57	53.26	1.841	0	1.841	0	0	0	0		NaN	NaN	NaN	NaN
20140904-PurClathDigest-1ug-01	1420	1413	18.067	0.96004	500	200140	1778400	0	-5.3024	1	12.94	59.89	59.89	57.6	53.28	1.845	0	1.845	0	0	0	0		NaN	NaN	NaN	NaN
20140904-PurClathDigest-1ug-01	1421	1414	18.083	0.95993	500	191950	1765900	0	-5.3024	1	12.9	59.71	59.71	57.63	53.3	1.849	0	1.849	0	0	0	0		NaN	NaN	NaN	NaN
20140904-PurClathDigest-1ug-01	1422	1415	18.099	0.96027	500	194030	1789000	0	-5.3024	1	12.87	59.53	59.53	57.67	53.33	1.853	0	1.853	0	0	0	0		NaN	NaN	NaN	NaN
20140904-PurClathDigest-1ug-01	1423	1416	18.115	0.95982	500	192480	1775600	0	-5.3024	1	12.84	59.36	59.36	57.7	53.35	1.857	0	1.857	0	0	0	0		NaN	NaN	NaN	NaN
20140904-PurClathDigest-1ug-01	1424	1417	18.131	0.95982	500	190010	1759900	0	-5.3024	1	12.8	59.18	59.18	57.74	53.37	1.861	0	1.861	0	0	0	0		NaN	NaN	NaN	NaN
20140904-PurClathDigest-1ug-01	1425	1418	18.147	0.96004	500	184860	1794300	0	-5.3024	1	12.77	59	59	57.77	53.39	1.864	0	1.864	0	0	0	0		NaN	NaN	NaN	NaN
20140904-PurClathDigest-1ug-01	1426	1419	18.163	0.96016	500	198130	1858800	0	-5.3024	1	12.73	59.08	59.08	57.84	53.47	1.86	0	1.86	0	0	0	0		NaN	NaN	NaN	NaN
20140904-PurClathDigest-1ug-01	1427	1420	18.179	0.96989	500	201500	1831800	0	-5.3024	1	12.68	59.22	59.22	57.92	53.56	1.854	0	1.854	0	0	0	0		NaN	NaN	NaN	NaN
20140904-PurClathDigest-1ug-01	1428	1421	18.195	0.95993	500	243950	1956100	0	-5.3024	1	12.63	59.36	59.36	58	53.64	1.848	0	1.848	0	0	0	0		NaN	NaN	NaN	NaN
20140904-PurClathDigest-1ug-01	1429	1422	18.211	0.96004	500	238420	1952300	0	-5.3024	1	12.59	59.5	59.5	58.07	53.73	1.842	0	1.842	0	0	0	0		NaN	NaN	NaN	NaN
20140904-PurClathDigest-1ug-01	1430	1423	18.227	0.96004	500	223650	1859000	0	-5.3024	1	12.54	59.64	59.64	58.15	53.82	1.837	0	1.837	0	0	0	0		NaN	NaN	NaN	NaN
20140904-PurClathDigest-1ug-01	1431	1424	18.243	0.95993	500	210430	1790700	0	-5.3024	1	12.49	59.79	59.79	58.23	53.91	1.831	0	1.831	0	0	0	0		NaN	NaN	NaN	NaN
20140904-PurClathDigest-1ug-01	1432	1425	18.259	0.96027	500	190710	1706900	0	-5.3024	1	12.45	59.93	59.93	58.31	54	1.825	0	1.825	0	0	0	0		NaN	NaN	NaN	NaN
20140904-PurClathDigest-1ug-01	1433	1426	18.275	0.9597	500	240250	1925100	0	-5.3024	1	12.4	60.07	60.07	58.38	54.09	1.819	0	1.819	0	0	0	0		NaN	NaN	NaN	NaN
20140904-PurClathDigest-1ug-01	1434	1427	18.291	0.96004	500	219220	1876600	0	-5.3024	1	12.35	60.21	60.21	58.46	54.17	1.813	0	1.813	0	0	0	0		NaN	NaN	NaN	NaN
20140904-PurClathDigest-1ug-01	1435	1428	18.307	0.96004	500	228510	1840100	0	-5.3024	1	12.31	60.35	60.35	58.54	54.26	1.807	0	1.807	0	0	0	0		NaN	NaN	NaN	NaN
20140904-PurClathDigest-1ug-01	1436	1429	18.323	0.96016	500	212380	1811200	0	-5.3024	1	12.26	60.49	60.49	58.62	54.35	1.801	0	1.801	0	0	0	0		NaN	NaN	NaN	NaN
20140904-PurClathDigest-1ug-01	1437	1430	18.339	0.95982	500	272790	2127200	0	-5.3024	1	12.21	60.63	60.63	58.69	54.44	1.795	0	1.795	0	0	0	0		NaN	NaN	NaN	NaN
20140904-PurClathDigest-1ug-01	1438	1431	18.355	0.97012	500	214870	1858700	0	-5.3024	1	12.17	60.77	60.77	58.77	54.53	1.789	0	1.789	0	0	0	0		NaN	NaN	NaN	NaN
20140904-PurClathDigest-1ug-01	1439	1432	18.371	0.97973	500	209530	1876700	0	-5.3024	1	12.12	60.91	60.91	58.85	54.61	1.783	0	1.783	0	0	0	0		NaN	NaN	NaN	NaN
20140904-PurClathDigest-1ug-01	1440	1433	18.388	0.96027	500	205220	1829100	0	-5.3024	1	12.07	61.06	61.06	58.93	54.7	1.777	0	1.777	0	0	0	0		NaN	NaN	NaN	NaN
20140904-PurClathDigest-1ug-01	1441	1434	18.404	0.95993	500	230750	1931900	0	-5.3024	1	12.03	61.2	61.2	59.01	54.79	1.771	0	1.771	0	0	0	0		NaN	NaN	NaN	NaN
20140904-PurClathDigest-1ug-01	1442	1435	18.42	0.95993	500	206510	1883300	0	-5.3024	1	11.98	61.34	61.34	59.08	54.88	1.765	0	1.765	0	0	0	0		NaN	NaN	NaN	NaN
20140904-PurClathDigest-1ug-01	1443	1436	18.436	0.95993	500	211210	1848600	0	-5.3024	1	11.93	61.48	61.48	59.16	54.97	1.759	0	1.759	0	0	0	0		NaN	NaN	NaN	NaN
20140904-PurClathDigest-1ug-01	1444	1437	18.452	0.96016	500	195540	1858600	0	-5.3024	1	11.88	61.6	61.6	59.25	55.07	1.754	0	1.754	0	0	0	0		NaN	NaN	NaN	NaN
20140904-PurClathDigest-1ug-01	1445	1438	18.468	0.96004	500	201280	1842400	0	-5.3024	1	11.81	61.51	61.51	59.46	55.28	1.756	0	1.756	0	0	0	0		NaN	NaN	NaN	NaN
20140904-PurClathDigest-1ug-01	1446	1439	18.484	0.95993	500	210520	1859500	0	-5.3024	1	11.74	61.41	61.41	59.66	55.49	1.758	0	1.758	0	0	0	0		NaN	NaN	NaN	NaN
20140904-PurClathDigest-1ug-01	1447	1440	18.5	0.96016	500	200840	1871100	0	-5.3024	1	11.67	61.32	61.32	59.87	55.7	1.759	0	1.759	0	0	0	0		NaN	NaN	NaN	NaN
20140904-PurClathDigest-1ug-01	1448	1441	18.516	0.95982	500	212420	1918400	0	-5.3024	1	11.6	61.23	61.23	60.07	55.91	1.761	0	1.761	0	0	0	0		NaN	NaN	NaN	NaN
20140904-PurClathDigest-1ug-01	1449	1442	18.532	0.97023	500	212790	1981700	0	-5.3024	1	11.53	61.14	61.14	60.28	56.12	1.763	0	1.763	0	0	0	0		NaN	NaN	NaN	NaN
20140904-PurClathDigest-1ug-01	1450	1443	18.548	0.9597	500	211840	1953800	0	-5.3024	1	11.45	61.04	61.04	60.49	56.33	1.764	0	1.764	0	0	0	0		NaN	NaN	NaN	NaN
20140904-PurClathDigest-1ug-01	1451	1444	18.564	0.96004	500	200750	1970200	0	-5.3024	1	11.38	60.95	60.95	60.69	56.54	1.766	0	1.766	0	0	0	0		NaN	NaN	NaN	NaN
20140904-PurClathDigest-1ug-01	1452	1445	18.58	0.96004	500	211300	1963800	0	-5.3024	1	11.31	60.86	60.86	60.9	56.75	1.768	0	1.768	0	0	0	0		NaN	NaN	NaN	NaN
20140904-PurClathDigest-1ug-01	1453	1446	18.596	0.96004	500	222570	1974800	0	-5.3024	1	11.24	60.76	60.76	61.1	56.96	1.769	0	1.769	0	0	0	0		NaN	NaN	NaN	NaN
20140904-PurClathDigest-1ug-01	1454	1447	18.612	0.95993	500	227960	2031800	0	-5.3024	1	11.17	60.67	60.67	61.31	57.17	1.771	0	1.771	0	0	0	0		NaN	NaN	NaN	NaN
20140904-PurClathDigest-1ug-01	1455	1448	18.628	0.95993	500	293150	2218000	0	-5.3024	1	11.1	60.58	60.58	61.52	57.38	1.773	0	1.773	0	0	0	0		NaN	NaN	NaN	NaN
20140904-PurClathDigest-1ug-01	1456	1449	18.644	0.96004	500	244330	2096700	0	-5.3024	1	11.02	60.48	60.48	61.72	57.59	1.774	0	1.774	0	0	0	0		NaN	NaN	NaN	NaN
20140904-PurClathDigest-1ug-01	1457	1450	18.66	0.96004	500	224380	2062000	0	-5.3024	1	10.95	60.39	60.39	61.93	57.81	1.776	0	1.776	0	0	0	0		NaN	NaN	NaN	NaN
20140904-PurClathDigest-1ug-01	1458	1451	18.676	0.96004	500	245990	2160200	0	-5.3024	1	10.88	60.3	60.3	62.13	58.02	1.778	0	1.778	0	0	0	0		NaN	NaN	NaN	NaN
20140904-PurClathDigest-1ug-01	1459	1452	18.692	0.95993	500	223830	2059700	0	-5.3024	1	10.81	60.21	60.21	62.34	58.23	1.78	0	1.78	0	0	0	0		NaN	NaN	NaN	NaN
20140904-PurClathDigest-1ug-01	1460	1453	18.708	0.97	500	226030	2048900	0	-5.3024	1	10.74	60.11	60.11	62.54	58.44	1.781	0	1.781	0	0	0	0		NaN	NaN	NaN	NaN
20140904-PurClathDigest-1ug-01	1461	1454	18.724	0.96004	500	227070	2060700	0	-5.3024	1	10.67	60.02	60.02	62.75	58.65	1.783	0	1.783	0	0	0	0		NaN	NaN	NaN	NaN
20140904-PurClathDigest-1ug-01	1462	1455	18.74	0.97	500	231250	2077000	0	-5.3024	1	10.59	59.93	59.93	62.96	58.86	1.785	0	1.785	0	0	0	0		NaN	NaN	NaN	NaN
20140904-PurClathDigest-1ug-01	1463	1456	18.756	0.95993	500	224360	2065100	0	-5.3024	1	10.52	59.68	59.68	63.19	59.1	1.784	0	1.784	0	0	0	0		NaN	NaN	NaN	NaN
20140904-PurClathDigest-1ug-01	1464	1457	18.772	0.96004	500	231020	2072700	0	-5.3024	1	10.45	59.19	59.19	63.46	59.38	1.778	0	1.778	0	0	0	0		NaN	NaN	NaN	NaN
20140904-PurClathDigest-1ug-01	1465	1458	18.788	0.95993	500	257520	2119600	0	-5.3024	1	10.37	58.7	58.7	63.73	59.66	1.773	0	1.773	0	0	0	0		NaN	NaN	NaN	NaN
20140904-PurClathDigest-1ug-01	1466	1459	18.804	0.95982	489.71	250940	2152200	0	-5.3024	1	10.3	58.2	58.2	64	59.94	1.767	0	1.767	0	0	0	0		NaN	NaN	NaN	NaN
20140904-PurClathDigest-1ug-01	1467	1460	18.82	0.96027	500	222350	2068900	0	-5.3024	1	10.22	57.71	57.71	64.27	60.22	1.762	0	1.762	0	0	0	0		NaN	NaN	NaN	NaN
20140904-PurClathDigest-1ug-01	1468	1461	18.836	0.95993	500	211420	2073200	0	-5.3024	1	10.15	57.22	57.22	64.54	60.5	1.756	0	1.756	0	0	0	0		NaN	NaN	NaN	NaN
20140904-PurClathDigest-1ug-01	1469	1462	18.852	0.94997	490.21	226380	2119900	0	-5.3024	1	10.07	56.73	56.73	64.82	60.78	1.751	0	1.751	0	0	0	0		NaN	NaN	NaN	NaN
20140904-PurClathDigest-1ug-01	1470	1463	18.868	0.96016	500	212380	2001500	0	-5.3024	1	9.999	56.24	56.24	65.08	61.06	1.745	0	1.745	0	0	0	0		NaN	NaN	NaN	NaN
20140904-PurClathDigest-1ug-01	1471	1464	18.884	0.76984	305.65	431790	3150900	0	-5.3024	1	9.924	55.75	55.75	65.35	61.34	1.74	0	1.74	0	0	0	0		NaN	NaN	NaN	NaN
20140904-PurClathDigest-1ug-01	1472	1465	18.897	0.78999	330.7	363920	2939400	0	-5.3024	1	9.864	55.35	55.35	65.57	61.56	1.735	0	1.735	0	0	0	0		NaN	NaN	NaN	NaN
20140904-PurClathDigest-1ug-01	1473	1466	18.91	0.83004	372.45	263780	2521600	0	-5.3024	1	9.803	54.95	54.95	65.79	61.79	1.731	0	1.731	0	0	0	0		NaN	NaN	NaN	NaN
20140904-PurClathDigest-1ug-01	1474	1467	18.924	0.89081	433.54	246100	2244200	0	-5.3024	1	9.738	54.52	54.52	66.03	62.03	1.726	0	1.726	0	0	0	0		NaN	NaN	NaN	NaN
20140904-PurClathDigest-1ug-01	1475	1468	18.939	0.9193	459.94	225030	2145600	0	-5.3024	1	9.669	54.07	54.07	66.28	62.29	1.721	0	1.721	0	0	0	0		NaN	NaN	NaN	NaN
20140904-PurClathDigest-1ug-01	1476	1469	18.954	0.86998	411.94	257580	2312700	0	-5.3024	1	9.597	53.59	53.59	66.54	62.56	1.716	0	1.716	0	0	0	0		NaN	NaN	NaN	NaN
20140904-PurClathDigest-1ug-01	1477	1470	18.968	0.87994	415.97	250720	2281200	0	-5.3024	1	9.53	53.15	53.15	66.78	62.82	1.711	0	1.711	0	0	0	0		NaN	NaN	NaN	NaN
20140904-PurClathDigest-1ug-01	1478	1471	18.983	0.84995	392.78	245370	2324900	0	-5.3024	1	9.461	52.7	52.7	67.03	63.07	1.706	0	1.706	0	0	0	0		NaN	NaN	NaN	NaN
20140904-PurClathDigest-1ug-01	1479	1472	18.997	0.84995	391.86	251960	2348500	0	-5.3024	1	9.395	52.26	52.26	67.27	63.32	1.701	0	1.701	0	0	0	0		NaN	NaN	NaN	NaN
20140904-PurClathDigest-1ug-01	1480	1473	19.011	0.86014	396.95	241470	2410100	0	-5.3024	1	9.329	51.83	51.83	67.51	63.57	1.696	0	1.696	0	0	0	0		NaN	NaN	NaN	NaN
20140904-PurClathDigest-1ug-01	1481	1474	19.026	0.78999	326.26	320180	2715600	0	-5.3024	1	9.262	51.39	51.39	67.76	63.82	1.691	0	1.691	0	0	0	0		NaN	NaN	NaN	NaN
20140904-PurClathDigest-1ug-01	1482	1475	19.039	0.80006	338.85	359820	2757300	0	-5.3024	1	9.201	50.98	50.98	67.98	64.05	1.686	0	1.686	0	0	0	0		NaN	NaN	NaN	NaN
20140904-PurClathDigest-1ug-01	1483	1476	19.052	0.82981	359.69	288600	2575300	0	-5.3024	1	9.139	50.57	50.57	68.21	64.29	1.683	0	1.683	0	0	0	0		NaN	NaN	NaN	NaN
20140904-PurClathDigest-1ug-01	1484	1477	19.066	0.77007	308.91	337980	2791000	0	-5.3024	1	9.082	50.15	50.15	68.48	64.55	1.686	0	1.686	0	0	0	0		NaN	NaN	NaN	NaN
20140904-PurClathDigest-1ug-01	1485	1478	19.079	0.81013	354.09	274260	2521400	0	-5.3024	1	9.028	49.77	49.77	68.73	64.8	1.689	0	1.689	0	0	0	0		NaN	NaN	NaN	NaN
20140904-PurClathDigest-1ug-01	1486	1479	19.092	0.81001	351.02	289720	2544900	0	-5.3024	1	8.972	49.36	49.36	68.99	65.05	1.692	0	1.692	0	0	0	0		NaN	NaN	NaN	NaN
20140904-PurClathDigest-1ug-01	1487	1480	19.106	0.7901	329.39	315470	2661200	0	-5.3024	1	8.916	48.95	48.95	69.26	65.31	1.694	0	1.694	0	0	0	0		NaN	NaN	NaN	NaN
20140904-PurClathDigest-1ug-01	1488	1481	19.119	0.78976	330.71	302500	2625700	0	-5.3024	1	8.861	48.55	48.55	69.52	65.56	1.697	0	1.697	0	0	0	0		NaN	NaN	NaN	NaN
20140904-PurClathDigest-1ug-01	1489	1482	19.132	0.76	296.49	316890	2743500	0	-5.3024	1	8.806	48.15	48.15	69.77	65.81	1.7	0	1.7	0	0	0	0		NaN	NaN	NaN	NaN
20140904-PurClathDigest-1ug-01	1490	1483	19.145	0.77007	313.34	332030	2774800	0	-5.3024	1	8.753	47.77	47.77	70.02	66.06	1.703	0	1.703	0	0	0	0		NaN	NaN	NaN	NaN
20140904-PurClathDigest-1ug-01	1491	1484	19.158	0.83988	383.64	251310	2346900	0	-5.3024	1	8.7	47.38	47.38	70.27	66.3	1.705	0	1.705	0	0	0	0		NaN	NaN	NaN	NaN
20140904-PurClathDigest-1ug-01	1492	1485	19.172	0.80029	345.31	297140	2513400	0	-5.3024	1	8.641	46.96	46.96	70.54	66.57	1.708	0	1.708	0	0	0	0		NaN	NaN	NaN	NaN
20140904-PurClathDigest-1ug-01	1493	1486	19.185	0.83977	379.07	282570	2381900	0	-5.3024	1	8.586	46.56	46.56	70.8	66.82	1.711	0	1.711	0	0	0	0		NaN	NaN	NaN	NaN
20140904-PurClathDigest-1ug-01	1494	1487	19.199	0.70999	251.44	344860	2971100	0	-5.3024	1	8.527	46.14	46.14	71.08	67.09	1.714	0	1.714	0	0	0	0		NaN	NaN	NaN	NaN
20140904-PurClathDigest-1ug-01	1495	1488	19.211	0.82008	353.5	283600	2461500	0	-5.3024	1	8.478	45.78	45.78	71.31	67.31	1.717	0	1.717	0	0	0	0		NaN	NaN	NaN	NaN
20140904-PurClathDigest-1ug-01	1496	1489	19.225	0.84	374.09	260970	2370000	0	-5.3024	1	8.421	45.37	45.37	71.57	67.58	1.719	0	1.719	0	0	0	0		NaN	NaN	NaN	NaN
20140904-PurClathDigest-1ug-01	1497	1490	19.239	0.81985	360.62	276310	2480000	0	-5.3024	1	8.363	44.94	44.94	71.85	67.84	1.722	0	1.722	0	0	0	0		NaN	NaN	NaN	NaN
20140904-PurClathDigest-1ug-01	1498	1491	19.252	0.78003	326.06	306430	2632500	0	-5.3024	1	8.306	44.53	44.53	72.11	68.1	1.725	0	1.725	0	0	0	0		NaN	NaN	NaN	NaN
20140904-PurClathDigest-1ug-01	1499	1492	19.265	0.84	376.04	288930	2440000	0	-5.3024	1	8.251	44.14	44.14	72.37	68.35	1.728	0	1.728	0	0	0	0		NaN	NaN	NaN	NaN
20140904-PurClathDigest-1ug-01	1500	1493	19.279	0.70004	240.08	503640	3405500	0	-5.3024	1	8.193	43.71	43.71	72.64	68.62	1.731	0	1.731	0	0	0	0		NaN	NaN	NaN	NaN
20140904-PurClathDigest-1ug-01	1501	1494	19.291	0.74009	284.92	385730	2947300	0	-5.3024	1	8.145	43.36	43.36	72.87	68.84	1.734	0	1.734	0	0	0	0		NaN	NaN	NaN	NaN
20140904-PurClathDigest-1ug-01	1502	1495	19.303	0.70015	237.04	433610	3325700	0	-5.3024	1	8.093	42.99	42.99	73.11	69.08	1.736	0	1.736	0	0	0	0		NaN	NaN	NaN	NaN
20140904-PurClathDigest-1ug-01	1503	1496	19.315	0.74982	295.55	344420	2853400	0	-5.3024	1	8.044	42.64	42.64	73.34	69.3	1.739	0	1.739	0	0	0	0		NaN	NaN	NaN	NaN
20140904-PurClathDigest-1ug-01	1504	1497	19.327	0.69992	240.36	466050	3444600	0	-5.3024	1	7.992	42.26	42.26	73.58	69.54	1.741	0	1.741	0	0	0	0		NaN	NaN	NaN	NaN
20140904-PurClathDigest-1ug-01	1505	1498	19.339	0.76996	306.28	295330	2627100	0	-5.3024	1	7.944	41.91	41.91	73.81	69.76	1.744	0	1.744	0	0	0	0		NaN	NaN	NaN	NaN
20140904-PurClathDigest-1ug-01	1506	1499	19.352	0.67017	211.9	424210	3464600	0	-5.3024	1	7.89	41.54	41.54	74.05	69.99	1.747	0	1.747	0	0	0.0003004	5.007E-05	16.67	NaN	NaN	NaN	NaN
20140904-PurClathDigest-1ug-01	1507	1500	19.363	0.70004	240.52	426200	3295400	0	-5.3024	1	7.845	41.3	41.3	74.22	70.14	1.752	0	1.752	0	0	0.002073	0.0003456	16.67	NaN	NaN	NaN	NaN
20140904-PurClathDigest-1ug-01	1508	1501	19.375	0.70999	251.96	442580	3161500	0	-5.3024	1	7.797	41.05	41.05	74.39	70.29	1.756	0	1.756	0	0	0.003925	0.0006542	16.67	NaN	NaN	NaN	NaN
20140904-PurClathDigest-1ug-01	1509	1502	19.387	0.76	302.72	314110	2701100	0	-5.3024	1	7.749	40.8	40.8	74.56	70.44	1.762	0	1.762	0	0	0.005804	0.0009673	16.67	NaN	NaN	NaN	NaN
20140904-PurClathDigest-1ug-01	1510	1503	19.399	0.73986	276.23	357160	2925000	0	-5.3024	1	7.697	40.53	40.53	74.75	70.6	1.767	0	1.767	0	0	0.007814	0.001302	16.67	NaN	NaN	NaN	NaN
20140904-PurClathDigest-1ug-01	1511	1504	19.412	0.77007	307.31	296150	2636100	0	-5.3024	1	7.647	40.27	40.27	74.93	70.76	1.772	0	1.772	0	0	0.009771	0.001629	16.67	NaN	NaN	NaN	NaN
20140904-PurClathDigest-1ug-01	1512	1505	19.424	0.77076	314.37	293250	2612700	0	-5.3024	1	7.594	40	40	75.11	70.93	1.778	0	1.778	0	0	0.01181	0.001968	16.67	NaN	NaN	NaN	NaN
20140904-PurClathDigest-1ug-01	1513	1506	19.437	0.81917	359.49	263440	2332800	0	-5.3024	1	7.542	39.72	39.72	75.3	71.09	1.783	0	1.783	0	0	0.01385	0.002308	16.67	NaN	NaN	NaN	NaN
20140904-PurClathDigest-1ug-01	1514	1507	19.451	0.78014	320.51	302590	2583700	0	-5.3024	1	7.486	39.43	39.43	75.5	71.27	1.789	0	1.789	0	0	0.01601	0.002669	16.67	NaN	NaN	NaN	NaN
20140904-PurClathDigest-1ug-01	1515	1508	19.464	0.7798	320.36	359390	2712900	0	-5.3024	1	7.433	39.16	39.16	75.69	71.44	1.794	0	1.794	0	0	0.01808	0.003013	16.67	NaN	NaN	NaN	NaN
20140904-PurClathDigest-1ug-01	1516	1509	19.477	0.83015	372.16	253480	2292500	0	-5.3024	1	7.38	38.88	38.88	75.88	71.61	1.8	0	1.8	0	0	0.02014	0.003357	16.67	NaN	NaN	NaN	NaN
20140904-PurClathDigest-1ug-01	1517	1510	19.491	0.78987	330.06	281190	2466400	0	-5.3024	1	7.323	38.59	38.59	76.09	71.79	1.806	0	1.806	0	0	0.02234	0.003723	16.67	NaN	NaN	NaN	NaN
20140904-PurClathDigest-1ug-01	1518	1511	19.504	0.7901	333.75	281810	2459500	0	-5.3024	1	7.269	38.31	38.31	76.28	71.96	1.811	0	1.811	0	0	0.02443	0.004071	16.67	NaN	NaN	NaN	NaN
20140904-PurClathDigest-1ug-01	1519	1512	19.517	0.67005	210.94	447650	3547100	0	-5.3024	1	7.216	38.03	38.03	76.47	72.13	1.817	0	1.817	0	0	0.02652	0.00442	16.67	NaN	NaN	NaN	NaN
20140904-PurClathDigest-1ug-01	1520	1513	19.528	0.73997	278.99	324550	2794400	0	-5.3024	1	7.17	37.79	37.79	76.64	72.27	1.821	0	1.821	0	0	0.02829	0.004715	16.67	NaN	NaN	NaN	NaN
20140904-PurClathDigest-1ug-01	1521	1514	19.541	0.65998	204.87	442650	3557500	0	-5.3024	1	7.12	37.53	37.53	76.82	72.43	1.827	0	1.827	0	0	0.03025	0.005041	16.67	NaN	NaN	NaN	NaN
20140904-PurClathDigest-1ug-01	1522	1515	19.552	0.71995	258.95	339850	2988000	0	-5.3024	1	7.075	37.29	37.29	76.98	72.57	1.831	0	1.831	0	0	0.03199	0.005332	16.67	NaN	NaN	NaN	NaN
20140904-PurClathDigest-1ug-01	1523	1516	19.564	0.76996	305.43	302950	2643500	0	-5.3024	1	7.026	37.04	37.04	77.15	72.73	1.836	0	1.836	0	0	0.0339	0.00565	16.67	NaN	NaN	NaN	NaN
20140904-PurClathDigest-1ug-01	1524	1517	19.576	0.72006	256.73	357900	2975200	0	-5.3024	1	6.973	36.77	36.77	77.34	72.89	1.842	0	1.842	0	0	0.03594	0.005989	16.67	NaN	NaN	NaN	NaN
20140904-PurClathDigest-1ug-01	1525	1518	19.588	0.73036	266.85	323540	2828600	0	-5.3024	1	6.924	36.51	36.51	77.52	73.05	1.847	0	1.847	0	0	0.03784	0.006307	16.67	NaN	NaN	NaN	NaN
20140904-PurClathDigest-1ug-01	1526	1519	19.601	0.70965	246.99	369350	3044900	0	-5.3024	1	6.875	36.25	36.25	77.7	73.2	1.852	0	1.852	0	0	0.03977	0.006629	16.67	NaN	NaN	NaN	NaN
20140904-PurClathDigest-1ug-01	1527	1520	19.612	0.70999	249.07	358990	3000900	0	-5.3024	1	6.826	36	36	77.87	73.36	1.857	0	1.857	0	0	0.04165	0.006942	16.67	NaN	NaN	NaN	NaN
20140904-PurClathDigest-1ug-01	1528	1521	19.624	0.77076	308.92	281130	2506300	0	-5.3024	1	6.778	35.75	35.75	78.04	73.51	1.862	0	1.862	0	0	0.04353	0.007255	16.67	NaN	NaN	NaN	NaN
20140904-PurClathDigest-1ug-01	1529	1522	19.637	0.74924	286.75	314230	2699800	0	-5.3024	1	6.725	35.48	35.48	78.23	73.67	1.868	0	1.868	0	0	0.04557	0.007595	16.67	NaN	NaN	NaN	NaN
20140904-PurClathDigest-1ug-01	1530	1523	19.65	0.73997	277.64	371040	2935800	0	-5.3024	1	6.674	35.21	35.21	78.41	73.84	1.873	0	1.873	0	0	0.04755	0.007925	16.67	NaN	NaN	NaN	NaN
20140904-PurClathDigest-1ug-01	1531	1524	19.662	0.78999	327.35	274180	2500200	0	-5.3024	1	6.703	35.09	35.09	78.44	73.77	1.909	0	1.909	0.001259	0.06595	0.05769	0.01014	17.58	NaN	NaN	NaN	NaN
20140904-PurClathDigest-1ug-01	1532	1525	19.675	0.77007	310.7	287060	2514700	0	-5.3024	1	6.736	34.97	34.97	78.46	73.69	1.948	0	1.948	0.002652	0.1361	0.06883	0.01258	18.27	NaN	NaN	NaN	NaN
20140904-PurClathDigest-1ug-01	1533	1526	19.688	0.78987	334.37	310230	2471800	0	-5.3024	1	6.769	34.85	34.85	78.48	73.61	1.986	0	1.986	0.00401	0.2019	0.0797	0.01495	18.76	NaN	NaN	NaN	NaN
20140904-PurClathDigest-1ug-01	1534	1527	19.701	0.76	301.31	293080	2573100	0	-5.3024	1	6.803	34.72	34.72	78.5	73.53	2.026	0	2.026	0.005403	0.2667	0.09084	0.01739	19.14	NaN	NaN	NaN	NaN
20140904-PurClathDigest-1ug-01	1535	1528	19.714	0.70999	247.65	401550	2988800	0	-5.3024	1	6.835	34.61	34.61	78.52	73.45	2.064	0	2.064	0.006743	0.3268	0.1016	0.01974	19.43	NaN	NaN	NaN	NaN
20140904-PurClathDigest-1ug-01	1536	1529	19.726	0.77019	307.09	275920	2516300	0	-5.3024	1	6.865	34.5	34.5	78.54	73.38	2.099	0	2.099	0.007996	0.3809	0.1116	0.02193	19.65	NaN	NaN	NaN	NaN
20140904-PurClathDigest-1ug-01	1537	1530	19.738	0.74993	291.65	280070	2560400	0	-5.3024	1	6.898	34.38	34.38	78.56	73.3	2.137	0	2.137	0.009354	0.4377	0.1225	0.02431	19.85	NaN	NaN	NaN	NaN
20140904-PurClathDigest-1ug-01	1538	1531	19.751	0.76069	288.98	315480	2714800	0	-5.3024	1	6.929	34.26	34.26	78.58	73.23	2.175	0	2.175	0.01068	0.491	0.133	0.02662	20.01	NaN	NaN	NaN	NaN
20140904-PurClathDigest-1ug-01	1539	1532	19.764	0.75932	298.6	295140	2609600	0	-5.3024	1	6.962	34.14	34.14	78.59	73.15	2.213	0	2.213	0.01202	0.5432	0.1438	0.02897	20.15	NaN	NaN	NaN	NaN
20140904-PurClathDigest-1ug-01	1540	1533	19.776	0.78003	317.7	262590	2368900	0	-5.3024	1	6.994	34.02	34.02	78.61	73.07	2.25	0	2.25	0.01336	0.5936	0.1545	0.03131	20.27	NaN	NaN	NaN	NaN
20140904-PurClathDigest-1ug-01	1541	1534	19.789	0.78003	316.21	273810	2471200	0	-5.3024	1	7.027	33.9	33.9	78.63	72.99	2.289	0	2.289	0.01473	0.6436	0.1655	0.03372	20.38	NaN	NaN	NaN	NaN
20140904-PurClathDigest-1ug-01	1542	1535	19.802	0.76	297.39	272120	2501100	0	-5.3024	1	7.06	33.78	33.78	78.65	72.92	2.328	0	2.328	0.01611	0.6919	0.1765	0.03613	20.47	NaN	NaN	NaN	NaN
20140904-PurClathDigest-1ug-01	1543	1536	19.815	0.73997	281.83	286170	2559100	0	-5.3024	1	7.092	33.66	33.66	78.67	72.84	2.366	0	2.366	0.01745	0.7375	0.1872	0.03847	20.55	NaN	NaN	NaN	NaN
20140904-PurClathDigest-1ug-01	1544	1537	19.827	0.68985	231.57	354930	2998500	0	-5.3024	1	7.123	33.55	33.55	78.69	72.76	2.403	0	2.403	0.01875	0.7805	0.1977	0.04076	20.62	NaN	NaN	NaN	NaN
20140904-PurClathDigest-1ug-01	1545	1538	19.839	0.72006	258.39	345250	2886700	0	-5.3024	1	7.153	33.44	33.44	78.71	72.69	2.437	0	2.437	0.01997	0.8194	0.2074	0.04289	20.68	NaN	NaN	NaN	NaN
20140904-PurClathDigest-1ug-01	1546	1539	19.851	0.76012	303.84	267810	2411300	0	-5.3024	1	7.183	33.33	33.33	78.73	72.62	2.473	0	2.473	0.02124	0.8589	0.2175	0.04511	20.73	NaN	NaN	NaN	NaN
20140904-PurClathDigest-1ug-01	1547	1540	19.863	0.76	296.68	293160	2510300	0	-5.3024	1	7.215	33.21	33.21	78.75	72.54	2.511	0	2.511	0.02258	0.8993	0.2283	0.04745	20.79	NaN	NaN	NaN	NaN
20140904-PurClathDigest-1ug-01	1548	1541	19.876	0.71995	261.1	352100	2845400	0	-5.3024	1	7.248	33.09	33.09	78.77	72.47	2.549	0	2.549	0.02392	0.9386	0.239	0.0498	20.84	NaN	NaN	NaN	NaN
20140904-PurClathDigest-1ug-01	1549	1542	19.888	0.73986	285.86	299350	2598800	0	-5.3024	1	7.278	32.98	32.98	78.79	72.39	2.585	0	2.585	0.02519	0.9747	0.2492	0.05202	20.88	NaN	NaN	NaN	NaN
20140904-PurClathDigest-1ug-01	1550	1543	19.9	0.76	292.86	290570	2567500	0	-5.3024	1	7.31	32.86	32.86	78.8	72.32	2.622	0	2.622	0.0265	1.011	0.2596	0.05431	20.92	NaN	NaN	NaN	NaN
20140904-PurClathDigest-1ug-01	1551	1544	19.913	0.70004	245.28	323570	2821800	0	-5.3024	1	7.342	32.74	32.74	78.82	72.24	2.659	0	2.659	0.02784	1.047	0.2703	0.05665	20.96	NaN	NaN	NaN	NaN
20140904-PurClathDigest-1ug-01	1552	1545	19.925	0.71011	243.33	333210	2802900	0	-5.3024	1	7.371	32.63	32.63	78.84	72.17	2.694	0	2.694	0.02907	1.079	0.2802	0.05881	20.99	NaN	NaN	NaN	NaN
20140904-PurClathDigest-1ug-01	1553	1546	19.937	0.73997	279.12	355430	2770400	0	-5.3024	1	7.402	32.52	32.52	78.86	72.1	2.73	0	2.73	0.03032	1.111	0.2902	0.061	21.02	NaN	NaN	NaN	NaN
20140904-PurClathDigest-1ug-01	1554	1547	19.949	0.68001	223.32	443430	3189700	0	-5.3024	1	7.433	32.41	32.41	78.88	72.02	2.767	0	2.767	0.03163	1.143	0.3007	0.06329	21.05	NaN	NaN	NaN	NaN
20140904-PurClathDigest-1ug-01	1555	1548	19.96	0.65998	199.7	548860	3500600	0	-5.3024	1	7.458	32.38	32.38	78.85	71.95	2.783	0	2.783	0.03229	1.16	0.3081	0.06349	20.61	NaN	NaN	NaN	NaN
20140904-PurClathDigest-1ug-01	1556	1549	19.971	0.68996	227.33	366140	3027600	0	-5.3024	1	7.482	32.36	32.36	78.81	71.87	2.796	0	2.796	0.03287	1.175	0.3151	0.06349	20.15	NaN	NaN	NaN	NaN
20140904-PurClathDigest-1ug-01	1557	1550	19.983	0.73013	267.1	328990	2728300	0	-5.3024	1	7.506	32.34	32.34	78.77	71.8	2.811	0	2.811	0.03348	1.191	0.3224	0.06349	19.7	NaN	NaN	NaN	NaN
20140904-PurClathDigest-1ug-01	1558	1551	19.995	0.68985	233.48	363210	2964200	0	-5.3024	1	7.533	32.32	32.32	78.73	71.72	2.826	0	2.826	0.03412	1.208	0.3301	0.06349	19.23	NaN	NaN	NaN	NaN
20140904-PurClathDigest-1ug-01	1559	1552	20.006	0.71033	246.19	350710	2900400	0	-5.3024	1	7.558	32.31	32.31	78.69	71.64	2.84	0	2.84	0.03473	1.223	0.3374	0.06349	18.82	NaN	NaN	NaN	NaN
20140904-PurClathDigest-1ug-01	1560	1553	20.018	0.68974	228.64	351250	2909200	0	-5.3024	1	7.583	32.29	32.29	78.65	71.56	2.855	0	2.855	0.03536	1.239	0.3449	0.06349	18.41	NaN	NaN	NaN	NaN
20140904-PurClathDigest-1ug-01	1561	1554	20.03	0.65002	187.47	549320	3617600	0	-5.3024	1	7.608	32.27	32.27	78.61	71.48	2.869	0	2.869	0.03596	1.254	0.3522	0.06349	18.03	NaN	NaN	NaN	NaN
20140904-PurClathDigest-1ug-01	1562	1555	20.041	0.63995	178.62	447150	3559900	0	-5.3024	1	7.631	32.25	32.25	78.58	71.41	2.882	0	2.882	0.03654	1.268	0.3591	0.06349	17.68	NaN	NaN	NaN	NaN
20140904-PurClathDigest-1ug-01	1563	1556	20.051	0.67989	224.84	351020	2991300	0	-5.3024	1	7.654	32.23	32.23	78.54	71.34	2.896	0	2.896	0.0371	1.281	0.3659	0.06349	17.35	NaN	NaN	NaN	NaN
20140904-PurClathDigest-1ug-01	1564	1557	20.063	0.69019	226.78	318080	2847900	0	-5.3024	1	7.679	32.21	32.21	78.5	71.26	2.91	0	2.91	0.0377	1.296	0.3731	0.06349	17.02	NaN	NaN	NaN	NaN
20140904-PurClathDigest-1ug-01	1565	1558	20.074	0.7299	266.8	292210	2639900	0	-5.3024	1	7.704	32.2	32.2	78.46	71.19	2.924	0	2.924	0.03831	1.31	0.3804	0.06349	16.69	NaN	NaN	NaN	NaN
20140904-PurClathDigest-1ug-01	1566	1559	20.086	0.73002	267.96	309150	2642500	0	-5.3024	1	7.73	32.18	32.18	78.42	71.1	2.939	0	2.939	0.03895	1.325	0.3881	0.06349	16.36	NaN	NaN	NaN	NaN
20140904-PurClathDigest-1ug-01	1567	1560	20.098	0.71995	254.1	304100	2666600	0	-5.3024	1	7.756	32.16	32.16	78.38	71.02	2.954	0	2.954	0.0396	1.34	0.3958	0.06349	16.04	NaN	NaN	NaN	NaN
20140904-PurClathDigest-1ug-01	1568	1561	20.11	0.70999	231.17	369940	2963800	0	-5.3024	1	7.782	32.14	32.14	78.34	70.94	2.969	0	2.969	0.04023	1.355	0.4034	0.06349	15.74	NaN	NaN	NaN	NaN
20140904-PurClathDigest-1ug-01	1569	1562	20.122	0.69008	235.96	326420	2829900	0	-5.3024	1	7.808	32.12	32.12	78.3	70.86	2.984	0	2.984	0.04086	1.369	0.4109	0.06349	15.45	NaN	NaN	NaN	NaN
20140904-PurClathDigest-1ug-01	1570	1563	20.134	0.69992	246.11	315500	2717300	0	-5.3024	1	7.833	32.1	32.1	78.26	70.79	2.998	0	2.998	0.04147	1.383	0.4182	0.06349	15.18	NaN	NaN	NaN	NaN
20140904-PurClathDigest-1ug-01	1571	1564	20.145	0.72006	261.42	292460	2559400	0	-5.3024	1	7.858	32.08	32.08	78.22	70.71	3.013	0	3.013	0.04208	1.397	0.4256	0.06349	14.92	NaN	NaN	NaN	NaN
20140904-PurClathDigest-1ug-01	1572	1565	20.157	0.70999	248.18	289500	2601500	0	-5.3024	1	7.884	32.06	32.06	78.18	70.63	3.028	0	3.028	0.04272	1.411	0.4333	0.06349	14.65	NaN	NaN	NaN	NaN
20140904-PurClathDigest-1ug-01	1573	1566	20.169	0.66994	209.21	342480	2965800	0	-5.3024	1	7.909	32.04	32.04	78.14	70.55	3.042	0	3.042	0.04335	1.425	0.4408	0.06349	14.4	NaN	NaN	NaN	NaN
20140904-PurClathDigest-1ug-01	1574	1567	20.18	0.63995	174.48	406140	3261300	0	-5.3024	1	7.933	32.02	32.02	78.11	70.47	3.056	0	3.056	0.04394	1.438	0.4479	0.06349	14.18	NaN	NaN	NaN	NaN
20140904-PurClathDigest-1ug-01	1575	1568	20.191	0.70015	241.5	286920	2703100	0	-5.3024	1	7.957	32.01	32.01	78.07	70.4	3.07	0	3.07	0.0445	1.45	0.4546	0.06349	13.97	NaN	NaN	NaN	NaN
20140904-PurClathDigest-1ug-01	1576	1569	20.203	0.70004	236.98	286150	2661300	0	-5.3024	1	7.982	31.99	31.99	78.03	70.32	3.084	0	3.084	0.04512	1.463	0.462	0.06349	13.74	NaN	NaN	NaN	NaN
20140904-PurClathDigest-1ug-01	1577	1570	20.214	0.68001	221.58	304950	2792900	0	-5.3024	1	8.007	31.97	31.97	77.99	70.25	3.099	0	3.099	0.04574	1.476	0.4695	0.06349	13.52	NaN	NaN	NaN	NaN
20140904-PurClathDigest-1ug-01	1578	1571	20.226	0.64064	176.77	432230	3419100	0	-5.3024	1	8.031	31.95	31.95	77.95	70.17	3.113	0	3.113	0.04633	1.489	0.4767	0.06349	13.32	NaN	NaN	NaN	NaN
20140904-PurClathDigest-1ug-01	1579	1572	20.236	0.67932	222.74	298860	2834400	0	-5.3024	1	8.054	31.93	31.93	77.92	70.1	3.126	0	3.126	0.0469	1.5	0.4834	0.06349	13.13	NaN	NaN	NaN	NaN
20140904-PurClathDigest-1ug-01	1580	1573	20.248	0.65071	186.8	316700	2997400	0	-5.3024	1	8.079	31.91	31.91	77.88	70.02	3.14	0	3.14	0.0475	1.513	0.4906	0.06349	12.94	NaN	NaN	NaN	NaN
20140904-PurClathDigest-1ug-01	1581	1574	20.259	0.64922	192.04	328430	3085700	0	-5.3024	1	8.082	31.81	31.81	77.94	70.07	3.148	0	3.148	0.04762	1.513	0.4937	0.06349	12.86	NaN	NaN	NaN	NaN
20140904-PurClathDigest-1ug-01	1582	1575	20.269	0.70999	244.68	270530	2630100	0	-5.3024	1	8.079	31.68	31.68	78.04	70.14	3.155	0	3.155	0.04762	1.509	0.4957	0.06349	12.81	NaN	NaN	NaN	NaN
20140904-PurClathDigest-1ug-01	1583	1576	20.281	0.61008	150.68	432800	3548400	0	-5.3024	1	8.077	31.53	31.53	78.13	70.23	3.162	0	3.162	0.04762	1.506	0.4978	0.06349	12.75	NaN	NaN	NaN	NaN
20140904-PurClathDigest-1ug-01	1584	1577	20.291	0.58994	129.56	628060	4148200	0	-5.3024	1	8.074	31.41	31.41	78.22	70.3	3.168	0	3.168	0.04762	1.503	0.4997	0.06349	12.71	NaN	NaN	NaN	NaN
20140904-PurClathDigest-1ug-01	1585	1578	20.301	0.65998	202.85	327340	3012100	0	-5.3024	1	8.072	31.29	31.29	78.3	70.36	3.174	0	3.174	0.04762	1.5	0.5016	0.06349	12.66	NaN	NaN	NaN	NaN
20140904-PurClathDigest-1ug-01	1586	1579	20.312	0.68001	216.8	326660	2930600	0	-5.3024	1	8.07	31.16	31.16	78.39	70.44	3.181	0	3.181	0.04762	1.497	0.5036	0.06349	12.61	NaN	NaN	NaN	NaN
20140904-PurClathDigest-1ug-01	1587	1580	20.324	0.61993	159.04	361290	3322000	0	-5.3024	1	8.067	31.02	31.02	78.49	70.52	3.188	0	3.188	0.04762	1.494	0.5057	0.06349	12.56	NaN	NaN	NaN	NaN
20140904-PurClathDigest-1ug-01	1588	1581	20.334	0.67005	207.26	365790	3012200	0	-5.3024	1	8.065	30.9	30.9	78.57	70.59	3.194	0	3.194	0.04762	1.491	0.5076	0.06349	12.51	NaN	NaN	NaN	NaN
20140904-PurClathDigest-1ug-01	1589	1582	20.345	0.70004	217.04	283060	2773500	0	-5.3024	1	8.062	30.76	30.76	78.67	70.67	3.201	0	3.201	0.04762	1.488	0.5097	0.06349	12.46	NaN	NaN	NaN	NaN
20140904-PurClathDigest-1ug-01	1590	1583	20.357	0.66021	200.99	306180	2886900	0	-5.3024	1	8.059	30.62	30.62	78.77	70.75	3.208	0	3.208	0.04762	1.484	0.5118	0.06349	12.4	NaN	NaN	NaN	NaN
20140904-PurClathDigest-1ug-01	1591	1584	20.368	0.66994	213.98	295720	2808300	0	-5.3024	1	8.057	30.49	30.49	78.86	70.83	3.214	0	3.214	0.04762	1.481	0.5139	0.06349	12.36	NaN	NaN	NaN	NaN
20140904-PurClathDigest-1ug-01	1592	1585	20.379	0.66982	207.06	297680	2806600	0	-5.3024	1	8.054	30.35	30.35	78.95	70.9	3.221	0	3.221	0.04762	1.478	0.5159	0.06349	12.31	NaN	NaN	NaN	NaN
20140904-PurClathDigest-1ug-01	1593	1586	20.39	0.67005	211.51	286810	2746600	0	-5.3024	1	8.052	30.22	30.22	79.04	70.98	3.228	0	3.228	0.04762	1.475	0.518	0.06349	12.26	NaN	NaN	NaN	NaN
20140904-PurClathDigest-1ug-01	1594	1587	20.401	0.66994	214.49	278640	2671900	0	-5.3024	1	8.049	30.09	30.09	79.14	71.06	3.235	0	3.235	0.04762	1.472	0.5201	0.06349	12.21	NaN	NaN	NaN	NaN
20140904-PurClathDigest-1ug-01	1595	1588	20.412	0.64007	177.96	351150	3201900	0	-5.3024	1	8.047	29.95	29.95	79.23	71.14	3.242	0	3.242	0.04762	1.469	0.5221	0.06349	12.16	NaN	NaN	NaN	NaN
20140904-PurClathDigest-1ug-01	1596	1589	20.423	0.68001	219.02	299180	2792700	0	-5.3024	1	8.044	29.82	29.82	79.32	71.21	3.248	0	3.248	0.04762	1.466	0.5241	0.06349	12.11	NaN	NaN	NaN	NaN
20140904-PurClathDigest-1ug-01	1597	1590	20.434	0.65998	205.51	284420	2766900	0	-5.3024	1	8.042	29.69	29.69	79.41	71.29	3.255	0	3.255	0.04762	1.463	0.5262	0.06349	12.07	NaN	NaN	NaN	NaN
20140904-PurClathDigest-1ug-01	1598	1591	20.445	0.65998	196.22	308990	2923100	0	-5.3024	1	8.039	29.55	29.55	79.51	71.37	3.262	0	3.262	0.04762	1.46	0.5282	0.06349	12.02	NaN	NaN	NaN	NaN
20140904-PurClathDigest-1ug-01	1599	1592	20.456	0.63	175.51	405770	3276200	0	-5.3024	1	8.037	29.42	29.42	79.6	71.44	3.268	0	3.268	0.04762	1.457	0.5303	0.06349	11.97	NaN	NaN	NaN	NaN
20140904-PurClathDigest-1ug-01	1600	1593	20.467	0.61008	155.01	332740	3198300	0	-5.3024	1	8.034	29.29	29.29	79.69	71.52	3.275	0	3.275	0.04762	1.454	0.5322	0.06349	11.93	NaN	NaN	NaN	NaN
20140904-PurClathDigest-1ug-01	1601	1594	20.477	0.64991	192.41	347970	3134000	0	-5.3024	1	8.032	29.17	29.17	79.77	71.59	3.281	0	3.281	0.04762	1.451	0.5341	0.06349	11.89	NaN	NaN	NaN	NaN
20140904-PurClathDigest-1ug-01	1602	1595	20.488	0.65998	197	300040	2839800	0	-5.3024	1	8.029	29.04	29.04	79.86	71.66	3.288	0	3.288	0.04762	1.448	0.5361	0.06349	11.84	NaN	NaN	NaN	NaN
20140904-PurClathDigest-1ug-01	1603	1596	20.499	0.66021	196.73	296030	2808400	0	-5.3024	1	8.027	28.91	28.91	79.95	71.74	3.294	0	3.294	0.04762	1.445	0.5382	0.06349	11.8	NaN	NaN	NaN	NaN
20140904-PurClathDigest-1ug-01	1604	1597	20.51	0.65987	199.34	282400	2755700	0	-5.3024	1	8.024	28.77	28.77	80.05	71.82	3.301	0	3.301	0.04762	1.443	0.5402	0.06349	11.75	NaN	NaN	NaN	NaN
20140904-PurClathDigest-1ug-01	1605	1598	20.521	0.65002	192.76	296990	2892500	0	-5.3024	1	8.022	28.64	28.64	80.14	71.89	3.308	0	3.308	0.04762	1.44	0.5422	0.06349	11.71	NaN	NaN	NaN	NaN
20140904-PurClathDigest-1ug-01	1606	1599	20.532	0.64991	189.23	318520	2997300	0	-5.3024	1	8.019	28.51	28.51	80.23	71.97	3.314	0	3.314	0.04762	1.437	0.5442	0.06349	11.67	NaN	NaN	NaN	NaN
20140904-PurClathDigest-1ug-01	1607	1600	20.543	0.62004	161.7	380840	3413500	0	-5.3024	1	8.017	28.38	28.38	80.32	72.04	3.321	0	3.321	0.04762	1.434	0.5462	0.06349	11.62	NaN	NaN	NaN	NaN
20140904-PurClathDigest-1ug-01	1608	1601	20.553	0.61993	159.54	342830	3310700	0	-5.3024	1	8.015	28.3	28.3	80.39	72.1	3.327	0	3.327	0.04762	1.431	0.5481	0.06349	11.58	NaN	NaN	NaN	NaN
20140904-PurClathDigest-1ug-01	1609	1602	20.563	1.2106	188.34	322500	2970400	1	-5.3024	1	8.014	28.34	28.34	80.43	72.14	3.331	0	3.331	0.04762	1.43	0.5497	0.06349	11.55	NaN	NaN	NaN	NaN
20140904-PurClathDigest-1ug-01	1611	1603	20.583	0.65952	201.31	324150	2965900	0	-5.3024	1	8.012	28.41	28.41	80.51	72.2	3.339	0	3.339	0.04762	1.426	0.5529	0.06349	11.48	NaN	NaN	NaN	NaN
20140904-PurClathDigest-1ug-01	1612	1604	20.594	0.62988	170.91	332870	3168200	0	-5.3024	1	8.011	28.45	28.45	80.55	72.23	3.343	0	3.343	0.04762	1.424	0.5547	0.06349	11.45	NaN	NaN	NaN	NaN
20140904-PurClathDigest-1ug-01	1613	1605	20.605	0.65002	191.34	285340	2832100	0	-5.3024	1	8.009	28.48	28.48	80.59	72.27	3.347	0	3.347	0.04762	1.423	0.5563	0.06349	11.41	NaN	NaN	NaN	NaN
20140904-PurClathDigest-1ug-01	1614	1606	20.616	1.2106	200.39	298990	2845300	1	-5.3024	1	8.008	28.52	28.52	80.64	72.3	3.351	0	3.351	0.04762	1.421	0.5581	0.06349	11.38	NaN	NaN	NaN	NaN
20140904-PurClathDigest-1ug-01	1616	1607	20.636	1.2	189.26	362300	3123400	1	-5.3024	1	8.006	28.59	28.59	80.72	72.37	3.359	0	3.359	0.04762	1.417	0.5613	0.06349	11.31	NaN	NaN	NaN	NaN
20140904-PurClathDigest-1ug-01	1618	1608	20.656	1.6799	199.3	306600	2914300	2	-5.3024	1	8.004	28.66	28.66	80.79	72.43	3.367	0	3.367	0.04762	1.414	0.5644	0.06349	11.25	NaN	NaN	NaN	NaN
20140904-PurClathDigest-1ug-01	1621	1609	20.684	1.9809	500	187670	1818200	2	-5.3024	1	8.001	28.76	28.76	80.9	72.52	3.379	0	3.379	0.04762	1.409	0.5689	0.06349	11.16	NaN	NaN	NaN	NaN
20140904-PurClathDigest-1ug-01	1624	1610	20.717	3.8593	230.95	200760	3146400	7	-5.3024	1	7.998	28.88	28.88	81.03	72.62	3.392	0	3.392	0.04762	1.404	0.5741	0.06349	11.06	NaN	NaN	NaN	NaN
20140904-PurClathDigest-1ug-01	1632	1611	20.781	3.7699	158.81	235940	4468100	7	-5.3134	1	7.991	29.1	29.1	81.28	72.82	3.417	0	3.417	0.04762	1.394	0.5843	0.06349	10.87	NaN	NaN	NaN	NaN
20140904-PurClathDigest-1ug-01	1640	1612	20.844	3.9199	130.79	603290	6022200	7	-5.3262	1	7.985	29.32	29.32	81.52	73.02	3.442	0	3.442	0.04762	1.383	0.5943	0.06349	10.68	NaN	NaN	NaN	NaN
20140904-PurClathDigest-1ug-01	1648	1613	20.909	3.93	137.02	287030	4818800	7	-5.3395	1	8.011	29.59	29.59	81.4	72.88	3.452	0	3.452	0.04762	1.379	0.6015	0.06349	10.56	NaN	NaN	NaN	NaN
20140904-PurClathDigest-1ug-01	1656	1614	20.975	3.8101	126.47	270060	5604600	7	-5.3528	1	8.042	29.86	29.86	81.24	72.7	3.461	0	3.461	0.04762	1.376	0.6085	0.06349	10.43	NaN	NaN	NaN	NaN
20140904-PurClathDigest-1ug-01	1664	1615	21.038	3.94	154.84	238920	4914100	7	-5.3657	1	8.071	30.12	30.12	81.08	72.52	3.469	0	3.469	0.04762	1.373	0.6152	0.06349	10.32	NaN	NaN	NaN	NaN
20140904-PurClathDigest-1ug-01	1672	1616	21.104	2.97	109.19	334180	5745400	5	-5.3791	1	8.101	30.4	30.4	80.92	72.34	3.478	0	3.478	0.04762	1.369	0.6221	0.06349	10.21	NaN	NaN	NaN	NaN
20140904-PurClathDigest-1ug-01	1678	1617	21.154	1.16	149.99	268400	4590600	1	-5.3892	1	8.127	30.63	30.63	80.79	72.2	3.483	0	3.483	0.04762	1.367	0.6271	0.06349	10.13	NaN	NaN	NaN	NaN
20140904-PurClathDigest-1ug-01	1680	1618	21.173	1.15	136	294560	4744100	1	-5.3931	1	8.15	30.84	30.84	80.72	72.14	3.478	0	3.478	0.04762	1.369	0.6276	0.06349	10.12	NaN	NaN	NaN	NaN
20140904-PurClathDigest-1ug-01	1682	1619	21.192	0.62954	151.71	296700	4556700	0	-5.397	1	8.173	31.06	31.06	80.64	72.07	3.473	0	3.473	0.04762	1.371	0.6281	0.06349	10.11	NaN	NaN	NaN	NaN
20140904-PurClathDigest-1ug-01	1683	1620	21.203	1.6105	130.21	297860	4892200	2	-5.3992	1	8.186	31.18	31.18	80.6	72.04	3.47	0	3.47	0.04762	1.372	0.6284	0.06349	10.1	NaN	NaN	NaN	NaN
20140904-PurClathDigest-1ug-01	1686	1621	21.229	1.1699	160.27	288260	4214900	1	-5.4046	1	8.218	31.48	31.48	80.5	71.95	3.463	0	3.463	0.04762	1.375	0.6291	0.06349	10.09	NaN	NaN	NaN	NaN
20140904-PurClathDigest-1ug-01	1688	1622	21.249	0.64957	177.97	253000	3925300	0	-5.4086	1	8.241	31.7	31.7	80.43	71.88	3.458	0	3.458	0.04762	1.377	0.6296	0.06349	10.08	NaN	NaN	NaN	NaN
20140904-PurClathDigest-1ug-01	1689	1623	21.26	1.6303	139.65	286150	4403000	2	-5.4108	1	8.254	31.82	31.82	80.39	71.84	3.455	0	3.455	0.04762	1.378	0.6299	0.06349	10.08	NaN	NaN	NaN	NaN
20140904-PurClathDigest-1ug-01	1692	1624	21.287	1.1601	139	323650	4374100	1	-5.4164	1	8.287	32.13	32.13	80.29	71.75	3.448	0	3.448	0.04762	1.381	0.6306	0.06349	10.07	NaN	NaN	NaN	NaN
20140904-PurClathDigest-1ug-01	1694	1625	21.306	0.65952	185.19	263350	3693000	0	-5.4203	1	8.31	32.34	32.34	80.21	71.69	3.443	0	3.443	0.04762	1.383	0.6311	0.06349	10.06	NaN	NaN	NaN	NaN
20140904-PurClathDigest-1ug-01	1695	1626	21.317	1.1607	151.65	280700	4038600	1	-5.4225	1	8.324	32.47	32.47	80.17	71.65	3.44	0	3.44	0.04762	1.384	0.6314	0.06349	10.06	NaN	NaN	NaN	NaN
20140904-PurClathDigest-1ug-01	1697	1627	21.337	1.1599	147.25	351110	4211400	1	-5.4265	1	8.347	32.68	32.68	80.1	71.58	3.435	0	3.435	0.04762	1.386	0.6319	0.06349	10.05	NaN	NaN	NaN	NaN
20140904-PurClathDigest-1ug-01	1699	1628	21.356	0.64945	179.6	273230	3578000	0	-5.4304	1	8.37	32.9	32.9	80.03	71.52	3.43	0	3.43	0.04762	1.388	0.6324	0.06349	10.04	NaN	NaN	NaN	NaN
20140904-PurClathDigest-1ug-01	1700	1629	21.367	0.63	156.52	291700	3934300	0	-5.4326	1	8.383	33.02	33.02	79.99	71.48	3.427	0	3.427	0.04762	1.39	0.6327	0.06349	10.03	NaN	NaN	NaN	NaN
20140904-PurClathDigest-1ug-01	1701	1630	21.377	0.62004	148.35	302800	3925300	0	-5.4347	1	8.396	33.14	33.14	79.95	71.44	3.424	0	3.424	0.04762	1.391	0.633	0.06349	10.03	NaN	NaN	NaN	NaN
20140904-PurClathDigest-1ug-01	1702	1631	21.388	0.62004	148.57	294470	3932400	0	-5.4369	1	8.408	33.26	33.26	79.91	71.41	3.421	0	3.421	0.04762	1.392	0.6333	0.06349	10.03	NaN	NaN	NaN	NaN
20140904-PurClathDigest-1ug-01	1703	1632	21.398	0.62004	150.33	281910	3906400	0	-5.439	1	8.421	33.37	33.37	79.87	71.37	3.419	0	3.419	0.04762	1.393	0.6335	0.06349	10.02	NaN	NaN	NaN	NaN
20140904-PurClathDigest-1ug-01	1704	1633	21.408	0.63	155.62	278920	3782800	0	-5.4411	1	8.433	33.49	33.49	79.83	71.34	3.416	0	3.416	0.04762	1.394	0.6338	0.06349	10.02	NaN	NaN	NaN	NaN
20140904-PurClathDigest-1ug-01	1705	1634	21.419	1.1805	160.51	300560	3781800	1	-5.4432	1	8.446	33.61	33.61	79.79	71.3	3.413	0	3.413	0.04762	1.395	0.6341	0.06349	10.01	NaN	NaN	NaN	NaN
20140904-PurClathDigest-1ug-01	1707	1635	21.438	0.65952	197.12	260050	3347000	0	-5.4472	1	8.47	33.83	33.83	79.72	71.24	3.408	0	3.408	0.04762	1.397	0.6346	0.06349	10	NaN	NaN	NaN	NaN
20140904-PurClathDigest-1ug-01	1708	1636	21.449	1.1705	162.36	298330	3677600	1	-5.4494	1	8.483	33.95	33.95	79.68	71.2	3.405	0	3.405	0.04762	1.399	0.6349	0.06349	10	NaN	NaN	NaN	NaN
20140904-PurClathDigest-1ug-01	1710	1637	21.469	0.65941	184.65	300940	3548600	0	-5.4534	1	8.518	34.1	34.1	79.64	71.2	3.397	0	3.397	0.04762	1.402	0.6324	0.06299	9.96	NaN	NaN	NaN	NaN
20140904-PurClathDigest-1ug-01	1711	1638	21.48	1.1705	152.37	307340	3771600	1	-5.4557	1	8.538	34.19	34.19	79.62	71.19	3.392	0	3.392	0.04762	1.404	0.631	0.0627	9.937	NaN	NaN	NaN	NaN
20140904-PurClathDigest-1ug-01	1713	1639	21.499	0.65987	192.68	274060	3330900	0	-5.4596	1	8.574	34.33	34.33	79.59	71.19	3.384	0	3.384	0.04762	1.407	0.6284	0.06219	9.896	NaN	NaN	NaN	NaN
20140904-PurClathDigest-1ug-01	1714	1640	21.51	1.1702	154.1	292280	3752600	1	-5.4619	1	8.594	34.41	34.41	79.57	71.19	3.379	0	3.379	0.04762	1.409	0.6269	0.06189	9.873	NaN	NaN	NaN	NaN
20140904-PurClathDigest-1ug-01	1716	1641	21.53	0.65952	193.76	289420	3367000	0	-5.4658	1	8.629	34.56	34.56	79.54	71.19	3.371	0	3.371	0.04762	1.413	0.6244	0.06138	9.831	NaN	NaN	NaN	NaN
20140904-PurClathDigest-1ug-01	1717	1642	21.541	0.63011	159.24	312890	3681800	0	-5.4681	1	8.649	34.64	34.64	79.52	71.18	3.366	0	3.366	0.04762	1.415	0.6229	0.06109	9.807	NaN	NaN	NaN	NaN
20140904-PurClathDigest-1ug-01	1718	1643	21.551	1.1604	145.07	312560	3812100	1	-5.4702	1	8.668	34.72	34.72	79.51	71.18	3.362	0	3.362	0.04762	1.416	0.6215	0.06081	9.784	NaN	NaN	NaN	NaN
20140904-PurClathDigest-1ug-01	1720	1644	21.571	0.61958	157.52	356550	3791700	0	-5.4742	1	8.704	34.87	34.87	79.47	71.18	3.354	0	3.354	0.04762	1.42	0.619	0.0603	9.742	NaN	NaN	NaN	NaN
20140904-PurClathDigest-1ug-01	1721	1645	21.581	0.63984	161.07	298870	3584800	0	-5.4763	1	8.723	34.94	34.94	79.46	71.18	3.349	0	3.349	0.04762	1.422	0.6176	0.06002	9.719	NaN	NaN	NaN	NaN
20140904-PurClathDigest-1ug-01	1722	1646	21.592	0.60997	139.48	352270	3914300	0	-5.4784	1	8.742	35.02	35.02	79.44	71.18	3.345	0	3.345	0.04762	1.424	0.6162	0.05974	9.696	NaN	NaN	NaN	NaN
20140904-PurClathDigest-1ug-01	1723	1647	21.602	0.62004	157.31	299620	3605000	0	-5.4805	1	8.761	35.1	35.1	79.42	71.17	3.34	0	3.34	0.04762	1.426	0.6148	0.05947	9.673	NaN	NaN	NaN	NaN
20140904-PurClathDigest-1ug-01	1724	1648	21.612	1.6405	165.8	304610	3447700	2	-5.4826	1	8.779	35.18	35.18	79.4	71.17	3.336	0	3.336	0.04762	1.427	0.6135	0.0592	9.65	NaN	NaN	NaN	NaN
20140904-PurClathDigest-1ug-01	1727	1649	21.64	0.65952	193.2	298420	3260400	0	-5.4882	1	8.829	35.38	35.38	79.36	71.17	3.325	0	3.325	0.04762	1.432	0.6098	0.05848	9.589	NaN	NaN	NaN	NaN
20140904-PurClathDigest-1ug-01	1728	1650	21.651	0.62004	159.42	295280	3447200	0	-5.4904	1	8.849	35.47	35.47	79.34	71.17	3.32	0	3.32	0.04762	1.434	0.6084	0.05819	9.564	NaN	NaN	NaN	NaN
20140904-PurClathDigest-1ug-01	1729	1651	21.661	0.61993	157.04	307000	3590200	0	-5.4925	1	8.868	35.54	35.54	79.32	71.16	3.315	0	3.315	0.04762	1.436	0.607	0.05791	9.54	NaN	NaN	NaN	NaN
20140904-PurClathDigest-1ug-01	1730	1652	21.671	0.63011	164.65	429230	3620700	0	-5.4946	1	8.887	35.62	35.62	79.31	71.16	3.311	0	3.311	0.04762	1.438	0.6057	0.05764	9.517	NaN	NaN	NaN	NaN
20140904-PurClathDigest-1ug-01	1731	1653	21.682	0.62004	154.74	350880	3642500	0	-5.4968	1	8.906	35.7	35.7	79.29	71.16	3.307	0	3.307	0.04762	1.44	0.6043	0.05736	9.493	NaN	NaN	NaN	NaN
20140904-PurClathDigest-1ug-01	1732	1654	21.692	0.63	163.5	300840	3535900	0	-5.4989	1	8.925	35.78	35.78	79.27	71.16	3.302	0	3.302	0.04762	1.442	0.6029	0.05709	9.469	NaN	NaN	NaN	NaN
20140904-PurClathDigest-1ug-01	1733	1655	21.703	0.58994	131.57	425210	4068400	0	-5.501	1	8.944	35.86	35.86	79.25	71.16	3.298	0	3.298	0.04762	1.444	0.6015	0.05681	9.445	NaN	NaN	NaN	NaN
20140904-PurClathDigest-1ug-01	1734	1656	21.712	1.1604	137.65	381110	3954000	1	-5.503	1	8.962	35.93	35.93	79.24	71.16	3.294	0	3.294	0.04762	1.446	0.6002	0.05655	9.422	NaN	NaN	NaN	NaN
20140904-PurClathDigest-1ug-01	1736	1657	21.732	1.2	189.53	308260	3355000	1	-5.5069	1	8.997	36.07	36.07	79.21	71.15	3.286	0	3.286	0.04762	1.449	0.5977	0.05604	9.376	NaN	NaN	NaN	NaN
20140904-PurClathDigest-1ug-01	1738	1658	21.752	0.64957	184.06	306480	3432400	0	-5.511	1	9.024	36.26	36.26	79.2	71.19	3.273	0	3.273	0.04744	1.449	0.5938	0.05523	9.302	NaN	NaN	NaN	NaN
20140904-PurClathDigest-1ug-01	1739	1659	21.763	1.1803	168.29	287810	3375200	1	-5.5132	1	8.983	36.56	36.56	79.39	71.46	3.242	0	3.242	0.04629	1.428	0.5849	0.05323	9.1	NaN	NaN	NaN	NaN
20140904-PurClathDigest-1ug-01	1741	1660	21.782	1.17	155.02	326100	3583800	1	-5.5172	1	8.91	37.11	37.11	79.72	71.94	3.186	0	3.186	0.04421	1.388	0.5688	0.04959	8.718	NaN	NaN	NaN	NaN
20140904-PurClathDigest-1ug-01	1743	1661	21.802	0.64957	189.53	283510	3241800	0	-5.5212	1	8.837	37.65	37.65	80.05	72.43	3.13	0	3.13	0.04214	1.346	0.5528	0.04598	8.317	NaN	NaN	NaN	NaN
20140904-PurClathDigest-1ug-01	1744	1662	21.813	0.62004	151.19	345100	3556500	0	-5.5234	1	8.796	37.96	37.96	80.23	72.69	3.099	0	3.099	0.041	1.323	0.5439	0.04397	8.084	NaN	NaN	NaN	NaN
20140904-PurClathDigest-1ug-01	1745	1663	21.823	0.63023	170.15	289690	3337000	0	-5.5255	1	8.758	38.24	38.24	80.4	72.95	3.07	0	3.07	0.03991	1.3	0.5355	0.04206	7.854	NaN	NaN	NaN	NaN
20140904-PurClathDigest-1ug-01	1746	1664	21.833	0.63972	172.17	292130	3308700	0	-5.5277	1	8.718	38.54	38.54	80.58	73.2	3.039	0	3.039	0.03879	1.276	0.5268	0.04011	7.614	NaN	NaN	NaN	NaN
20140904-PurClathDigest-1ug-01	1747	1665	21.844	0.60001	139.39	359060	3691100	0	-5.5298	1	8.678	38.84	38.84	80.76	73.47	3.009	0	3.009	0.03767	1.252	0.5181	0.03814	7.361	NaN	NaN	NaN	NaN
20140904-PurClathDigest-1ug-01	1748	1666	21.854	0.63011	169.75	286240	3336700	0	-5.5319	1	8.641	39.11	39.11	80.93	73.71	2.98	0	2.98	0.03661	1.228	0.5099	0.03628	7.116	NaN	NaN	NaN	NaN
20140904-PurClathDigest-1ug-01	1749	1667	21.865	0.61981	162.55	331590	3492500	0	-5.534	1	8.601	39.41	39.41	81.1	73.97	2.95	0	2.95	0.0355	1.203	0.5013	0.03434	6.85	NaN	NaN	NaN	NaN
20140904-PurClathDigest-1ug-01	1750	1668	21.875	0.60997	150.11	362430	3678300	0	-5.5361	1	8.563	39.7	39.7	81.28	74.23	2.921	0	2.921	0.0344	1.178	0.4928	0.03243	6.58	NaN	NaN	NaN	NaN
20140904-PurClathDigest-1ug-01	1751	1669	21.885	0.62004	157.06	378610	3717500	0	-5.5382	1	8.525	39.98	39.98	81.45	74.48	2.892	0	2.892	0.03333	1.152	0.4845	0.03054	6.305	NaN	NaN	NaN	NaN
20140904-PurClathDigest-1ug-01	1752	1670	21.895	0.61008	151.37	321820	3589500	0	-5.5403	1	8.486	40.27	40.27	81.62	74.73	2.862	0	2.862	0.03223	1.126	0.476	0.02863	6.015	NaN	NaN	NaN	NaN
20140904-PurClathDigest-1ug-01	1753	1671	21.906	0.63	172.26	301610	3299300	0	-5.5424	1	8.448	40.55	40.55	81.79	74.98	2.833	0	2.833	0.03116	1.1	0.4677	0.02675	5.719	NaN	NaN	NaN	NaN
20140904-PurClathDigest-1ug-01	1754	1672	21.916	0.63	164.62	308220	3401600	0	-5.5445	1	8.409	40.84	40.84	81.97	75.24	2.803	0	2.803	0.03005	1.072	0.4591	0.0248	5.403	NaN	NaN	NaN	NaN
20140904-PurClathDigest-1ug-01	1755	1673	21.927	0.62004	153.56	344630	3628600	0	-5.5466	1	8.369	41.14	41.14	82.15	75.5	2.773	0	2.773	0.02894	1.043	0.4504	0.02286	5.075	NaN	NaN	NaN	NaN
20140904-PurClathDigest-1ug-01	1756	1674	21.937	0.60986	154.09	350730	3616900	0	-5.5487	1	8.331	41.42	41.42	82.32	75.75	2.744	0	2.744	0.02784	1.015	0.442	0.02095	4.739	NaN	NaN	NaN	NaN
20140904-PurClathDigest-1ug-01	1757	1675	21.947	0.62004	158.39	343970	3601000	0	-5.5508	1	8.293	41.71	41.71	82.49	76	2.715	0	2.715	0.02677	0.986	0.4336	0.01906	4.396	NaN	NaN	NaN	NaN
20140904-PurClathDigest-1ug-01	1758	1676	21.957	1.6405	163.56	323030	3441500	2	-5.5529	1	8.254	42	42	82.66	76.26	2.685	0	2.685	0.02567	0.9561	0.4252	0.01715	4.034	NaN	NaN	NaN	NaN
20140904-PurClathDigest-1ug-01	1761	1677	21.985	0.65952	190.01	318000	3278500	0	-5.5585	1	8.151	42.76	42.76	83.12	76.93	2.607	0	2.607	0.02278	0.8737	0.4027	0.01209	3.001	NaN	NaN	NaN	NaN
20140904-PurClathDigest-1ug-01	1762	1678	21.996	1.1505	130.71	428170	4024300	1	-5.5607	1	8.11	43.07	43.07	83.31	77.2	2.576	0	2.576	0.02162	0.8392	0.3937	0.01005	2.553	NaN	NaN	NaN	NaN
20140904-PurClathDigest-1ug-01	1764	1679	22.015	0.62954	169.76	357070	3486800	0	-5.5646	1	8.038	43.6	43.6	83.63	77.68	2.521	0	2.521	0.01959	0.777	0.378	0.0065	1.72	NaN	NaN	NaN	NaN
20140904-PurClathDigest-1ug-01	1765	1680	22.025	0.61993	160.56	350570	3463100	0	-5.5668	1	7.999	43.89	43.89	83.81	77.93	2.491	0	2.491	0.01848	0.7418	0.3694	0.004557	1.234	NaN	NaN	NaN	NaN
20140904-PurClathDigest-1ug-01	1766	1681	22.036	0.62016	158.09	329230	3527500	0	-5.5689	1	7.96	44.18	44.18	83.98	78.19	2.461	0	2.461	0.01738	0.7062	0.3609	0.002643	0.7324	NaN	NaN	NaN	NaN
20140904-PurClathDigest-1ug-01	1767	1682	22.046	0.62988	173.75	330020	3333600	0	-5.571	1	7.922	44.47	44.47	84.16	78.44	2.432	0	2.432	0.01629	0.6698	0.3524	0.0007292	0.2069	NaN	NaN	NaN	NaN
20140904-PurClathDigest-1ug-01	1768	1683	22.057	0.62004	155.56	345180	3748200	0	-5.5731	1	7.886	44.66	44.66	84.25	78.6	2.413	0	2.413	0.01553	0.6433	0.3454	0	0	NaN	NaN	NaN	NaN
20140904-PurClathDigest-1ug-01	1769	1684	22.067	1.1404	126.99	551320	4472500	1	-5.5752	1	7.852	44.79	44.79	84.3	78.69	2.402	0	2.402	0.01498	0.6236	0.3394	0	0	NaN	NaN	NaN	NaN
20140904-PurClathDigest-1ug-01	1771	1685	22.086	0.65952	197.59	319650	3261600	0	-5.5791	1	7.791	45.02	45.02	84.4	78.85	2.381	0	2.381	0.01397	0.5869	0.3283	0	0	NaN	NaN	NaN	NaN
20140904-PurClathDigest-1ug-01	1772	1686	22.097	0.63	167.35	389240	3608000	0	-5.5813	1	7.755	45.16	45.16	84.45	78.95	2.369	0	2.369	0.01339	0.5654	0.3219	0	0	NaN	NaN	NaN	NaN
20140904-PurClathDigest-1ug-01	1773	1687	22.107	0.62016	162.2	379930	3565900	0	-5.5835	1	7.721	45.29	45.29	84.5	79.04	2.357	0	2.357	0.01284	0.5446	0.3158	0	0	NaN	NaN	NaN	NaN
20140904-PurClathDigest-1ug-01	1774	1688	22.118	0.61981	154.95	353350	3537800	0	-5.5856	1	7.688	45.42	45.42	84.55	79.13	2.345	0	2.345	0.01229	0.524	0.3098	0	0	NaN	NaN	NaN	NaN
20140904-PurClathDigest-1ug-01	1775	1689	22.128	0.62027	158.94	337580	3511600	0	-5.5877	1	7.654	45.55	45.55	84.6	79.22	2.334	0	2.334	0.01174	0.5031	0.3038	0	0	NaN	NaN	NaN	NaN
20140904-PurClathDigest-1ug-01	1776	1690	22.138	0.62977	167.63	331810	3356500	0	-5.5898	1	7.621	45.67	45.67	84.65	79.31	2.322	0	2.322	0.0112	0.4821	0.2978	0	0	NaN	NaN	NaN	NaN
20140904-PurClathDigest-1ug-01	1777	1691	22.149	0.60997	149	402980	3745300	0	-5.5919	1	7.587	45.8	45.8	84.7	79.4	2.311	0	2.311	0.01064	0.4605	0.2916	0	0	NaN	NaN	NaN	NaN
20140904-PurClathDigest-1ug-01	1778	1692	22.159	0.63	161.72	325540	3451700	0	-5.594	1	7.554	45.93	45.93	84.75	79.49	2.299	0	2.299	0.0101	0.4394	0.2857	0	0	NaN	NaN	NaN	NaN
20140904-PurClathDigest-1ug-01	1779	1693	22.17	0.61008	146.29	380780	3670900	0	-5.5961	1	7.52	46.06	46.06	84.8	79.58	2.288	0	2.288	0.009547	0.4173	0.2796	0	0	NaN	NaN	NaN	NaN
20140904-PurClathDigest-1ug-01	1780	1694	22.18	0.62004	163.1	337000	3434300	0	-5.5982	1	7.487	46.19	46.19	84.85	79.67	2.276	0	2.276	0.009009	0.3957	0.2737	0	0	NaN	NaN	NaN	NaN
20140904-PurClathDigest-1ug-01	1781	1695	22.19	0.63	172.93	409670	3482900	0	-5.6003	1	7.454	46.31	46.31	84.9	79.76	2.265	0	2.265	0.008462	0.3736	0.2677	0	0	NaN	NaN	NaN	NaN
20140904-PurClathDigest-1ug-01	1782	1696	22.201	0.63995	172.26	327360	3256500	0	-5.6024	1	7.42	46.44	46.44	84.96	79.85	2.253	0	2.253	0.007907	0.3509	0.2616	0	0	NaN	NaN	NaN	NaN
20140904-PurClathDigest-1ug-01	1783	1697	22.211	0.62004	164.46	371280	3398000	0	-5.6046	1	7.385	46.58	46.58	85.01	79.94	2.241	0	2.241	0.007342	0.3276	0.2554	0	0	NaN	NaN	NaN	NaN
20140904-PurClathDigest-1ug-01	1784	1698	22.222	0.5999	134.54	470550	4031600	0	-5.6067	1	7.352	46.7	46.7	85.06	80.03	2.23	0	2.23	0.006796	0.3047	0.2494	0	0	NaN	NaN	NaN	NaN
20140904-PurClathDigest-1ug-01	1785	1699	22.232	0.60001	139.1	409850	3964600	0	-5.6087	1	7.319	46.83	46.83	85.11	80.12	2.219	0	2.219	0.006267	0.2824	0.2435	0	0	NaN	NaN	NaN	NaN
20140904-PurClathDigest-1ug-01	1786	1700	22.242	1.1605	149.21	373700	3642600	1	-5.6108	1	7.287	46.95	46.95	85.15	80.2	2.208	0	2.208	0.005738	0.2599	0.2377	0	0	NaN	NaN	NaN	NaN
20140904-PurClathDigest-1ug-01	1788	1701	22.261	0.63961	181.39	369610	3380700	0	-5.6147	1	7.224	47.19	47.19	85.25	80.37	2.186	0	2.186	0.004714	0.2156	0.2265	0	0	NaN	NaN	NaN	NaN
20140904-PurClathDigest-1ug-01	1789	1702	22.272	0.58983	131.47	420180	3959200	0	-5.6169	1	7.19	47.32	47.32	85.3	80.46	2.174	0	2.174	0.00415	0.1909	0.2203	0	0	NaN	NaN	NaN	NaN
20140904-PurClathDigest-1ug-01	1790	1703	22.281	0.62016	161.27	366620	3389400	0	-5.6189	1	7.158	47.44	47.44	85.35	80.55	2.164	0	2.164	0.00363	0.1678	0.2145	0	0	NaN	NaN	NaN	NaN
20140904-PurClathDigest-1ug-01	1791	1704	22.292	0.61981	164.25	383190	3611500	0	-5.621	1	7.124	47.57	47.57	85.4	80.64	2.152	0	2.152	0.003083	0.1433	0.2085	0	0	NaN	NaN	NaN	NaN
20140904-PurClathDigest-1ug-01	1792	1705	22.302	0.61008	154.86	386680	3624100	0	-5.6231	1	7.091	47.7	47.7	85.45	80.73	2.141	0	2.141	0.002537	0.1185	0.2025	0	0	NaN	NaN	NaN	NaN
20140904-PurClathDigest-1ug-01	1793	1706	22.312	0.63	159.9	375410	3577100	0	-5.6252	1	7.058	47.83	47.83	85.5	80.82	2.129	0	2.129	0.001999	0.09386	0.1966	0	0	NaN	NaN	NaN	NaN
20140904-PurClathDigest-1ug-01	1794	1707	22.323	0.61008	142.05	436660	3809800	0	-5.6273	1	7.024	47.96	47.96	85.55	80.91	2.118	0	2.118	0.001443	0.06814	0.1905	0	0	NaN	NaN	NaN	NaN
20140904-PurClathDigest-1ug-01	1795	1708	22.333	0.60997	140.34	474270	3982100	0	-5.6294	1	6.991	48.08	48.08	85.6	80.99	2.106	0	2.106	0.000905	0.04297	0.1846	0	0	NaN	NaN	NaN	NaN
20140904-PurClathDigest-1ug-01	1796	1709	22.343	0.64007	175.46	348010	3404500	0	-5.6315	1	6.958	48.21	48.21	85.65	81.08	2.095	0	2.095	0.0003671	0.01752	0.1786	0	0	NaN	NaN	NaN	NaN
20140904-PurClathDigest-1ug-01	1797	1710	22.354	0.61981	159.65	347420	3403600	0	-5.6336	1	6.935	48.27	48.27	85.65	81.12	2.085	0	2.085	0	0	0.174	0	0	NaN	NaN	NaN	NaN
20140904-PurClathDigest-1ug-01	1798	1711	22.364	0.61008	143.96	384160	3662000	0	-5.6357	1	6.934	48.19	48.19	85.56	81.04	2.079	0	2.079	0	0	0.1724	0	0	NaN	NaN	NaN	NaN
20140904-PurClathDigest-1ug-01	1799	1712	22.374	0.60997	154.44	355310	3475500	0	-5.6378	1	6.932	48.12	48.12	85.47	80.96	2.073	0	2.073	0	0	0.1708	0	0	NaN	NaN	NaN	NaN
20140904-PurClathDigest-1ug-01	1800	1713	22.384	0.62004	159.87	415640	3688300	0	-5.6399	1	6.931	48.05	48.05	85.38	80.89	2.067	0	2.067	0	0	0.1691	0	0	NaN	NaN	NaN	NaN
20140904-PurClathDigest-1ug-01	1801	1714	22.395	0.61008	150.68	435280	3860100	0	-5.642	1	6.929	47.98	47.98	85.29	80.81	2.061	0	2.061	0	0	0.1675	0	0	NaN	NaN	NaN	NaN
20140904-PurClathDigest-1ug-01	1802	1715	22.405	0.62988	164.51	413930	3659500	0	-5.644	1	6.928	47.9	47.9	85.21	80.73	2.055	0	2.055	0	0	0.1659	0	0	NaN	NaN	NaN	NaN
20140904-PurClathDigest-1ug-01	1803	1716	22.415	0.62004	156.45	361420	3468800	0	-5.6462	1	6.927	47.83	47.83	85.12	80.66	2.049	0	2.049	0	0	0.1642	0	0	NaN	NaN	NaN	NaN
20140904-PurClathDigest-1ug-01	1804	1717	22.426	0.60997	153.68	367240	3565000	0	-5.6483	1	6.925	47.76	47.76	85.03	80.58	2.043	0	2.043	0	0	0.1626	0	0	NaN	NaN	NaN	NaN
20140904-PurClathDigest-1ug-01	1805	1718	22.436	0.63	171.89	330830	3289800	0	-5.6504	1	6.924	47.68	47.68	84.94	80.5	2.037	0	2.037	0	0	0.161	0	0	NaN	NaN	NaN	NaN
20140904-PurClathDigest-1ug-01	1806	1719	22.446	0.63995	180.35	316880	3152800	0	-5.6525	1	6.922	47.61	47.61	84.85	80.43	2.031	0	2.031	0	0	0.1593	0	0	NaN	NaN	NaN	NaN
20140904-PurClathDigest-1ug-01	1807	1720	22.457	0.61008	154.26	436850	3648600	0	-5.6547	1	6.921	47.53	47.53	84.75	80.35	2.025	0	2.025	0	0	0.1576	0	0	NaN	NaN	NaN	NaN
20140904-PurClathDigest-1ug-01	1808	1721	22.467	0.63023	174.21	318170	3263300	0	-5.6567	1	6.919	47.46	47.46	84.67	80.27	2.019	0	2.019	0	0	0.156	0	0	NaN	NaN	NaN	NaN
20140904-PurClathDigest-1ug-01	1809	1722	22.478	0.65002	169.28	316510	3265700	0	-5.6589	1	6.918	47.39	47.39	84.57	80.19	2.013	0	2.013	0	0	0.1543	0	0	NaN	NaN	NaN	NaN
20140904-PurClathDigest-1ug-01	1810	1723	22.489	0.63972	171.54	339890	3328300	0	-5.6611	1	6.916	47.31	47.31	84.48	80.11	2.007	0	2.007	0	0	0.1526	0	0	NaN	NaN	NaN	NaN
20140904-PurClathDigest-1ug-01	1811	1724	22.499	0.63995	174.97	325410	3246400	0	-5.6633	1	6.915	47.23	47.23	84.39	80.03	2	0	2	0	0	0.1509	0	0	NaN	NaN	NaN	NaN
20140904-PurClathDigest-1ug-01	1812	1725	22.51	0.64968	182.76	335590	3228300	0	-5.6654	1	6.913	47.16	47.16	84.3	79.95	1.994	0	1.994	0	0	0.1492	0	0	NaN	NaN	NaN	NaN
20140904-PurClathDigest-1ug-01	1813	1726	22.521	0.62027	156.13	357990	3506000	0	-5.6676	1	6.912	47.08	47.08	84.2	79.87	1.988	0	1.988	0	0	0.1475	0	0	NaN	NaN	NaN	NaN
20140904-PurClathDigest-1ug-01	1814	1727	22.531	0.63034	166.42	373970	3367000	0	-5.6697	1	6.91	47.01	47.01	84.11	79.8	1.982	0	1.982	0	0	0.1459	0	0	NaN	NaN	NaN	NaN
20140904-PurClathDigest-1ug-01	1815	1728	22.542	0.62977	168.38	343770	3377900	0	-5.6719	1	6.909	46.93	46.93	84.02	79.72	1.976	0	1.976	0	0	0.1442	0	0	NaN	NaN	NaN	NaN
20140904-PurClathDigest-1ug-01	1816	1729	22.552	0.61993	155.15	395520	3647500	0	-5.674	1	6.908	46.86	46.86	83.93	79.64	1.97	0	1.97	0	0	0.1425	0	0	NaN	NaN	NaN	NaN
20140904-PurClathDigest-1ug-01	1817	1730	22.562	0.62016	156.62	366770	3592900	0	-5.6761	1	6.906	46.78	46.78	83.84	79.56	1.964	0	1.964	0	0	0.1409	0	0	NaN	NaN	NaN	NaN
20140904-PurClathDigest-1ug-01	1818	1731	22.573	0.62988	167.02	338230	3371400	0	-5.6782	1	6.905	46.71	46.71	83.75	79.49	1.958	0	1.958	0	0	0.1392	0	0	NaN	NaN	NaN	NaN
20140904-PurClathDigest-1ug-01	1819	1732	22.583	0.60997	152.68	362150	3519600	0	-5.6804	1	6.903	46.63	46.63	83.66	79.41	1.952	0	1.952	0	0	0.1376	0	0	NaN	NaN	NaN	NaN
20140904-PurClathDigest-1ug-01	1820	1733	22.593	0.62084	156.13	396520	3709300	0	-5.6824	1	6.902	46.56	46.56	83.57	79.33	1.946	0	1.946	0	0	0.136	0	0	NaN	NaN	NaN	NaN
20140904-PurClathDigest-1ug-01	1821	1734	22.604	0.61947	164.34	410760	3758000	0	-5.6845	1	6.9	46.49	46.49	83.48	79.26	1.94	0	1.94	0	0	0.1343	0	0	NaN	NaN	NaN	NaN
20140904-PurClathDigest-1ug-01	1822	1735	22.614	0.60974	149.74	409460	3774900	0	-5.6866	1	6.899	46.42	46.42	83.39	79.18	1.934	0	1.934	0	0	0.1327	0	0	NaN	NaN	NaN	NaN
20140904-PurClathDigest-1ug-01	1823	1736	22.624	0.61008	154.65	387820	3684500	0	-5.6887	1	6.897	46.34	46.34	83.3	79.1	1.928	0	1.928	0	0	0.1311	0	0	NaN	NaN	NaN	NaN
20140904-PurClathDigest-1ug-01	1824	1737	22.634	0.61981	163.25	358930	3520400	0	-5.6908	1	6.896	46.27	46.27	83.21	79.03	1.922	0	1.922	0	0	0.1295	0	0	NaN	NaN	NaN	NaN
20140904-PurClathDigest-1ug-01	1825	1738	22.645	0.6102	144.6	414440	4198800	0	-5.6929	1	6.895	46.2	46.2	83.13	78.95	1.916	0	1.916	0	0	0.1278	0	0	NaN	NaN	NaN	NaN
20140904-PurClathDigest-1ug-01	1826	1739	22.655	0.61993	160.06	365930	3861700	0	-5.695	1	6.89	46.29	46.29	83.04	78.88	1.91	0	1.91	0	0	0.1266	0	0	NaN	NaN	NaN	NaN
20140904-PurClathDigest-1ug-01	1827	1740	22.665	0.61993	157.7	377720	3709200	0	-5.6971	1	6.882	46.57	46.57	82.96	78.81	1.905	0	1.905	0	0	0.1258	0	0	NaN	NaN	NaN	NaN
20140904-PurClathDigest-1ug-01	1828	1741	22.676	0.62016	156.4	355850	3634200	0	-5.6992	1	6.875	46.84	46.84	82.87	78.74	1.9	0	1.9	0	0	0.125	0	0	NaN	NaN	NaN	NaN
20140904-PurClathDigest-1ug-01	1829	1742	22.686	0.60997	152.55	374010	3654000	0	-5.7013	1	6.867	47.12	47.12	82.79	78.66	1.895	0	1.895	0	0	0.1241	0	0	NaN	NaN	NaN	NaN
20140904-PurClathDigest-1ug-01	1830	1743	22.696	0.61993	158.37	365410	3542100	0	-5.7033	1	6.859	47.39	47.39	82.71	78.59	1.89	0	1.89	0	0	0.1233	0	0	NaN	NaN	NaN	NaN
20140904-PurClathDigest-1ug-01	1831	1744	22.706	0.5999	144.94	373760	3656500	0	-5.7055	1	6.852	47.67	47.67	82.62	78.52	1.884	0	1.884	0	0	0.1225	0	0	NaN	NaN	NaN	NaN
20140904-PurClathDigest-1ug-01	1832	1745	22.716	0.61008	150.23	415660	3789700	0	-5.7075	1	6.844	47.93	47.93	82.54	78.45	1.879	0	1.879	0	0	0.1217	0	0	NaN	NaN	NaN	NaN
20140904-PurClathDigest-1ug-01	1833	1746	22.727	0.63011	167.04	350930	3444200	0	-5.7096	1	6.836	48.2	48.2	82.46	78.38	1.874	0	1.874	0	0	0.1209	0	0	NaN	NaN	NaN	NaN
20140904-PurClathDigest-1ug-01	1834	1747	22.737	0.63984	180.22	311690	3189400	0	-5.7117	1	6.829	48.48	48.48	82.37	78.31	1.869	0	1.869	0	0	0.1201	0	0	NaN	NaN	NaN	NaN
20140904-PurClathDigest-1ug-01	1835	1748	22.748	1.1905	176.22	347830	3306700	1	-5.7139	1	6.821	48.77	48.77	82.29	78.24	1.864	0	1.864	0	0	0.1192	0	0	NaN	NaN	NaN	NaN
20140904-PurClathDigest-1ug-01	1837	1749	22.768	0.64957	187.86	363850	3374000	0	-5.7179	1	6.806	49.3	49.3	82.13	78.1	1.854	0	1.854	0	0	0.1177	0	0	NaN	NaN	NaN	NaN
20140904-PurClathDigest-1ug-01	1838	1750	22.778	0.62988	146.62	456200	3911600	0	-5.7201	1	6.798	49.59	49.59	82.04	78.02	1.848	0	1.848	0	0	0.1168	0	0	NaN	NaN	NaN	NaN
20140904-PurClathDigest-1ug-01	1839	1751	22.789	0.63011	166.16	497810	3641500	0	-5.7223	1	6.79	49.87	49.87	81.95	77.95	1.843	0	1.843	0	0	0.116	0	0	NaN	NaN	NaN	NaN
20140904-PurClathDigest-1ug-01	1840	1752	22.799	0.63995	181.33	380440	3397600	0	-5.7244	1	6.782	50.15	50.15	81.87	77.88	1.838	0	1.838	0	0	0.1151	0	0	NaN	NaN	NaN	NaN
20140904-PurClathDigest-1ug-01	1841	1753	22.81	1.1904	169.66	434190	3608100	1	-5.7266	1	6.774	50.43	50.43	81.78	77.8	1.832	0	1.832	0	0	0.1143	0	0	NaN	NaN	NaN	NaN
20140904-PurClathDigest-1ug-01	1843	1754	22.83	0.65964	198.35	349250	3249100	0	-5.7306	1	6.759	50.96	50.96	81.62	77.67	1.822	0	1.822	0	0	0.1127	0	0	NaN	NaN	NaN	NaN
20140904-PurClathDigest-1ug-01	1844	1755	22.841	0.62988	165.52	381340	3467200	0	-5.7328	1	6.751	51.26	51.26	81.53	77.59	1.817	0	1.817	0	0	0.1118	0	0	NaN	NaN	NaN	NaN
20140904-PurClathDigest-1ug-01	1845	1756	22.851	0.64018	174.35	346710	3289500	0	-5.735	1	6.743	51.54	51.54	81.45	77.52	1.811	0	1.811	0	0	0.111	0	0	NaN	NaN	NaN	NaN
20140904-PurClathDigest-1ug-01	1846	1757	22.862	0.62988	172.53	445970	3555700	0	-5.7372	1	6.735	51.82	51.82	81.36	77.44	1.806	0	1.806	0	0	0.1102	0	0	NaN	NaN	NaN	NaN
20140904-PurClathDigest-1ug-01	1847	1758	22.873	0.63	173.3	330900	3245000	0	-5.7393	1	6.727	52.1	52.1	81.28	77.37	1.801	0	1.801	0	0	0.1093	0	0	NaN	NaN	NaN	NaN
20140904-PurClathDigest-1ug-01	1848	1759	22.883	0.63011	170.82	332230	3280000	0	-5.7414	1	6.719	52.38	52.38	81.19	77.3	1.796	0	1.796	0	0	0.1085	0	0	NaN	NaN	NaN	NaN
20140904-PurClathDigest-1ug-01	1849	1760	22.894	0.63034	169.51	353230	3345900	0	-5.7436	1	6.711	52.66	52.66	81.11	77.22	1.79	0	1.79	0	0	0.1077	0	0	NaN	NaN	NaN	NaN
20140904-PurClathDigest-1ug-01	1850	1761	22.904	0.61947	159.87	412570	3675200	0	-5.7457	1	6.703	52.94	52.94	81.02	77.15	1.785	0	1.785	0	0	0.1068	0	0	NaN	NaN	NaN	NaN
20140904-PurClathDigest-1ug-01	1851	1762	22.914	0.62004	160.32	429120	3750800	0	-5.7478	1	6.696	53.22	53.22	80.94	77.08	1.78	0	1.78	0	0	0.106	0	0	NaN	NaN	NaN	NaN
20140904-PurClathDigest-1ug-01	1852	1763	22.925	0.62004	161.58	412310	3677200	0	-5.7499	1	6.688	53.49	53.49	80.86	77.01	1.775	0	1.775	0	0	0.1052	0	0	NaN	NaN	NaN	NaN
20140904-PurClathDigest-1ug-01	1853	1764	22.935	0.63995	184.51	342520	3405500	0	-5.752	1	6.68	53.77	53.77	80.77	76.94	1.769	0	1.769	0	0	0.1044	0	0	NaN	NaN	NaN	NaN
20140904-PurClathDigest-1ug-01	1854	1765	22.946	0.63011	167.46	346630	3386400	0	-5.7542	1	6.672	54.05	54.05	80.69	76.86	1.764	0	1.764	0	0	0.1035	0	0	NaN	NaN	NaN	NaN
20140904-PurClathDigest-1ug-01	1855	1766	22.956	0.63	169.77	378270	3488100	0	-5.7563	1	6.667	54.14	54.14	80.62	76.8	1.761	0	1.761	0	0	0.1028	0	0	NaN	NaN	NaN	NaN
20140904-PurClathDigest-1ug-01	1856	1767	22.967	0.65002	188.83	322320	3212000	0	-5.7585	1	6.663	54.08	54.08	80.56	76.75	1.759	0	1.759	0	0	0.1023	0	0	NaN	NaN	NaN	NaN
20140904-PurClathDigest-1ug-01	1857	1768	22.978	0.63	165.44	376390	3539000	0	-5.7607	1	6.66	54.03	54.03	80.5	76.7	1.757	0	1.757	0	0	0.1017	0	0	NaN	NaN	NaN	NaN
20140904-PurClathDigest-1ug-01	1858	1769	22.988	0.63	167.79	368910	3432300	0	-5.7628	1	6.656	53.97	53.97	80.44	76.65	1.755	0	1.755	0	0	0.1012	0	0	NaN	NaN	NaN	NaN
20140904-PurClathDigest-1ug-01	1859	1770	22.999	0.60997	154.6	420380	3720900	0	-5.765	1	6.652	53.92	53.92	80.39	76.6	1.753	0	1.753	0	0	0.1006	0	0	NaN	NaN	NaN	NaN
20140904-PurClathDigest-1ug-01	1860	1771	23.009	0.63995	179.47	328510	3320700	0	-5.767	1	6.649	53.87	53.87	80.33	76.55	1.751	0	1.751	0	0	0.1001	0	0	NaN	NaN	NaN	NaN
20140904-PurClathDigest-1ug-01	1861	1772	23.019	0.64007	175.8	332140	3341600	0	-5.7692	1	6.645	53.82	53.82	80.27	76.5	1.749	0	1.749	0	0	0.0995	0	0	NaN	NaN	NaN	NaN
20140904-PurClathDigest-1ug-01	1862	1773	23.03	0.65002	189.15	329690	3216800	0	-5.7714	1	6.642	53.76	53.76	80.22	76.44	1.747	0	1.747	0	0	0.09894	0	0	NaN	NaN	NaN	NaN
20140904-PurClathDigest-1ug-01	1863	1774	23.041	0.62027	160.09	380760	3584500	0	-5.7736	1	6.638	53.71	53.71	80.16	76.39	1.745	0	1.745	0	0	0.09837	0	0	NaN	NaN	NaN	NaN
20140904-PurClathDigest-1ug-01	1864	1775	23.051	0.62965	170.52	370660	3512400	0	-5.7757	1	6.634	53.65	53.65	80.1	76.34	1.743	0	1.743	0	0	0.09782	0	0	NaN	NaN	NaN	NaN
20140904-PurClathDigest-1ug-01	1865	1776	23.062	0.63	171.61	387240	3490900	0	-5.7778	1	6.631	53.6	53.6	80.04	76.29	1.741	0	1.741	0	0	0.09726	0	0	NaN	NaN	NaN	NaN
20140904-PurClathDigest-1ug-01	1866	1777	23.072	0.63995	180.11	336000	3326700	0	-5.78	1	6.627	53.55	53.55	79.99	76.24	1.739	0	1.739	0	0	0.09671	0	0	NaN	NaN	NaN	NaN
20140904-PurClathDigest-1ug-01	1867	1778	23.083	0.63	166.9	349930	3478300	0	-5.7821	1	6.623	53.49	53.49	79.93	76.19	1.737	0	1.737	0	0	0.09614	0	0	NaN	NaN	NaN	NaN
20140904-PurClathDigest-1ug-01	1868	1779	23.093	0.64007	176.48	368170	3422100	0	-5.7843	1	6.62	53.44	53.44	79.87	76.14	1.735	0	1.735	0	0	0.09559	0	0	NaN	NaN	NaN	NaN
20140904-PurClathDigest-1ug-01	1869	1780	23.104	0.62004	159.88	440780	3802100	0	-5.7864	1	6.616	53.38	53.38	79.82	76.08	1.733	0	1.733	0	0	0.09502	0	0	NaN	NaN	NaN	NaN
20140904-PurClathDigest-1ug-01	1870	1781	23.114	0.63995	172.98	336410	3312100	0	-5.7885	1	6.612	53.33	53.33	79.76	76.03	1.731	0	1.731	0	0	0.09448	0	0	NaN	NaN	NaN	NaN
20140904-PurClathDigest-1ug-01	1871	1782	23.125	0.63995	176.47	358900	3393300	0	-5.7907	1	6.609	53.28	53.28	79.7	75.98	1.729	0	1.729	0	0	0.09391	0	0	NaN	NaN	NaN	NaN
20140904-PurClathDigest-1ug-01	1872	1783	23.136	0.62004	157.32	403720	3749100	0	-5.7929	1	6.605	53.22	53.22	79.64	75.93	1.728	0	1.728	0	0	0.09335	0	0	NaN	NaN	NaN	NaN
20140904-PurClathDigest-1ug-01	1873	1784	23.146	0.63	165.1	355690	3525300	0	-5.795	1	6.602	53.17	53.17	79.59	75.88	1.726	0	1.726	0	0	0.0928	0	0	NaN	NaN	NaN	NaN
20140904-PurClathDigest-1ug-01	1874	1785	23.157	0.65002	182.33	335610	3260500	0	-5.7971	1	6.598	53.12	53.12	79.53	75.83	1.724	0	1.724	0	0	0.09225	0	0	NaN	NaN	NaN	NaN
20140904-PurClathDigest-1ug-01	1875	1786	23.167	0.62988	172.48	344580	3362700	0	-5.7993	1	6.594	53.06	53.06	79.47	75.78	1.722	0	1.722	0	0	0.09167	0	0	NaN	NaN	NaN	NaN
20140904-PurClathDigest-1ug-01	1876	1787	23.178	0.68012	197.08	386430	3291100	0	-5.8015	1	6.591	53.01	53.01	79.41	75.72	1.72	0	1.72	0	0	0.09112	0	0	NaN	NaN	NaN	NaN
20140904-PurClathDigest-1ug-01	1877	1788	23.189	0.62004	154.51	447070	3829900	0	-5.8038	1	6.587	52.95	52.95	79.35	75.67	1.718	0	1.718	0	0	0.09052	0	0	NaN	NaN	NaN	NaN
20140904-PurClathDigest-1ug-01	1878	1789	23.2	0.62988	169.05	369760	3414500	0	-5.8059	1	6.583	52.9	52.9	79.3	75.62	1.716	0	1.716	0	0	0.08997	0	0	NaN	NaN	NaN	NaN
20140904-PurClathDigest-1ug-01	1879	1790	23.21	0.64007	176.59	357040	3360400	0	-5.808	1	6.58	52.84	52.84	79.24	75.57	1.714	0	1.714	0	0	0.08941	0	0	NaN	NaN	NaN	NaN
20140904-PurClathDigest-1ug-01	1880	1791	23.221	0.64991	190.79	312110	3117600	0	-5.8102	1	6.576	52.79	52.79	79.18	75.52	1.712	0	1.712	0	0	0.08885	0	0	NaN	NaN	NaN	NaN
20140904-PurClathDigest-1ug-01	1881	1792	23.232	0.64007	183.2	335980	3255500	0	-5.8124	1	6.572	52.73	52.73	79.12	75.46	1.71	0	1.71	0	0	0.08828	0	0	NaN	NaN	NaN	NaN
20140904-PurClathDigest-1ug-01	1882	1793	23.242	0.64991	184.27	333400	3205000	0	-5.8146	1	6.569	52.68	52.68	79.07	75.41	1.708	0	1.708	0	0	0.08771	0	0	NaN	NaN	NaN	NaN
20140904-PurClathDigest-1ug-01	1883	1794	23.253	0.64018	182.08	429990	3355500	0	-5.8168	1	6.564	52.6	52.6	79.01	75.36	1.707	0	1.707	0	0	0.08746	0	0	NaN	NaN	NaN	NaN
20140904-PurClathDigest-1ug-01	1884	1795	23.264	1.1911	175.85	348750	3340700	1	-5.819	1	6.56	52.46	52.46	78.95	75.3	1.708	0	1.708	0	0	0.08803	0	0	NaN	NaN	NaN	NaN
20140904-PurClathDigest-1ug-01	1886	1796	23.284	0.64877	189.11	469020	3586900	0	-5.823	1	6.551	52.2	52.2	78.85	75.19	1.71	0	1.71	0	0	0.08908	0	0	NaN	NaN	NaN	NaN
20140904-PurClathDigest-1ug-01	1887	1797	23.294	0.63011	172.18	379250	3497700	0	-5.8252	1	6.546	52.06	52.06	78.79	75.13	1.711	0	1.711	0	0	0.08965	0	0	NaN	NaN	NaN	NaN
20140904-PurClathDigest-1ug-01	1888	1798	23.305	0.62016	163.16	388880	3626300	0	-5.8273	1	6.541	51.93	51.93	78.73	75.08	1.712	0	1.712	0	0	0.09021	0	0	NaN	NaN	NaN	NaN
20140904-PurClathDigest-1ug-01	1889	1799	23.315	1.2003	179.32	357370	3350400	1	-5.8294	1	6.536	51.79	51.79	78.68	75.02	1.713	0	1.713	0	0	0.09075	0	0	NaN	NaN	NaN	NaN
20140904-PurClathDigest-1ug-01	1891	1800	23.335	0.66959	215.22	331930	3039300	0	-5.8335	1	6.527	51.53	51.53	78.58	74.92	1.715	0	1.715	0	0	0.09181	0	0	NaN	NaN	NaN	NaN
20140904-PurClathDigest-1ug-01	1892	1801	23.346	0.63995	181.82	345370	3316300	0	-5.8358	1	6.522	51.38	51.38	78.52	74.86	1.717	0	1.717	0	0	0.0924	0	0	NaN	NaN	NaN	NaN
20140904-PurClathDigest-1ug-01	1893	1802	23.357	0.63995	174.84	377700	3444600	0	-5.838	1	6.517	51.25	51.25	78.46	74.8	1.718	0	1.718	0	0	0.09297	0	0	NaN	NaN	NaN	NaN
20140904-PurClathDigest-1ug-01	1894	1803	23.368	0.63	167.54	382670	3510200	0	-5.8401	1	6.513	51.11	51.11	78.4	74.74	1.719	0	1.719	0	0	0.09353	0	0	NaN	NaN	NaN	NaN
20140904-PurClathDigest-1ug-01	1895	1804	23.378	0.64007	164.13	363550	3487000	0	-5.8423	1	6.508	50.97	50.97	78.35	74.68	1.72	0	1.72	0	0	0.09409	0	0	NaN	NaN	NaN	NaN
20140904-PurClathDigest-1ug-01	1896	1805	23.389	0.58994	127.02	749700	4766500	0	-5.8445	1	6.503	50.83	50.83	78.29	74.63	1.721	0	1.721	0	0	0.09465	0	0	NaN	NaN	NaN	NaN
20140904-PurClathDigest-1ug-01	1897	1806	23.399	0.61008	152.92	419300	3714900	0	-5.8465	1	6.499	50.7	50.7	78.24	74.57	1.722	0	1.722	0	0	0.09517	0	0	NaN	NaN	NaN	NaN
20140904-PurClathDigest-1ug-01	1898	1807	23.409	0.63	169.78	363200	3334500	0	-5.8485	1	6.494	50.57	50.57	78.19	74.52	1.723	0	1.723	0	0	0.09571	0	0	NaN	NaN	NaN	NaN
20140904-PurClathDigest-1ug-01	1899	1808	23.419	0.65071	193.25	321090	3044800	0	-5.8507	1	6.489	50.43	50.43	78.13	74.46	1.724	0	1.724	0	0	0.09626	0	0	NaN	NaN	NaN	NaN
20140904-PurClathDigest-1ug-01	1900	1809	23.43	0.63927	179.2	334240	3233800	0	-5.8529	1	6.484	50.29	50.29	78.07	74.41	1.725	0	1.725	0	0	0.09684	0	0	NaN	NaN	NaN	NaN
20140904-PurClathDigest-1ug-01	1901	1810	23.441	0.64018	181.23	353020	3258400	0	-5.855	1	6.479	50.15	50.15	78.02	74.35	1.727	0	1.727	0	0	0.0974	0	0	NaN	NaN	NaN	NaN
20140904-PurClathDigest-1ug-01	1902	1811	23.452	1.1705	155.96	425870	3705800	1	-5.8572	1	6.475	50.02	50.02	77.96	74.29	1.728	0	1.728	0	0	0.09797	0	0	NaN	NaN	NaN	NaN
20140904-PurClathDigest-1ug-01	1904	1812	23.471	0.68928	229.6	374700	2986600	0	-5.8612	1	6.466	49.76	49.76	77.86	74.19	1.73	0	1.73	0	0	0.099	0	0	NaN	NaN	NaN	NaN
20140904-PurClathDigest-1ug-01	1905	1813	23.483	0.62988	170.75	481720	3461800	0	-5.8635	1	6.461	49.61	49.61	77.8	74.12	1.731	0	1.731	0	0	0.09961	0	0	NaN	NaN	NaN	NaN
20140904-PurClathDigest-1ug-01	1906	1814	23.493	0.6102	147.74	478310	3799800	0	-5.8657	1	6.456	49.47	49.47	77.74	74.07	1.732	0	1.732	0	0	0.1002	0	0	NaN	NaN	NaN	NaN
20140904-PurClathDigest-1ug-01	1907	1815	23.503	0.62988	173.44	365800	3383200	0	-5.8677	1	6.451	49.34	49.34	77.69	74.01	1.733	0	1.733	0	0	0.1007	0	0	NaN	NaN	NaN	NaN
20140904-PurClathDigest-1ug-01	1908	1816	23.514	0.6601	194.18	317470	3064400	0	-5.8699	1	6.447	49.21	49.21	77.64	73.96	1.734	0	1.734	0	0	0.1013	0	0	NaN	NaN	NaN	NaN
20140904-PurClathDigest-1ug-01	1909	1817	23.525	0.65998	191.93	334940	3084600	0	-5.8721	1	6.442	49.06	49.06	77.58	73.9	1.735	0	1.735	0	0	0.1018	0	0	NaN	NaN	NaN	NaN
20140904-PurClathDigest-1ug-01	1910	1818	23.536	0.66994	205.57	328420	3016900	0	-5.8744	1	6.437	48.92	48.92	77.52	73.84	1.737	0	1.737	0	0	0.1024	0	0	NaN	NaN	NaN	NaN
20140904-PurClathDigest-1ug-01	1911	1819	23.547	0.65998	196.95	302280	2934000	0	-5.8766	1	6.432	48.77	48.77	77.46	73.78	1.738	0	1.738	0	0	0.103	0	0	NaN	NaN	NaN	NaN
20140904-PurClathDigest-1ug-01	1912	1820	23.558	0.65998	197.68	315810	2950700	0	-5.8789	1	6.421	48.7	48.7	77.43	73.75	1.738	0	1.738	0	0	0.104	0	0	NaN	NaN	NaN	NaN
20140904-PurClathDigest-1ug-01	1913	1821	23.569	0.65002	190.54	308290	3018100	0	-5.8811	1	6.409	48.66	48.66	77.41	73.74	1.737	0	1.737	0	0	0.1052	0	0	NaN	NaN	NaN	NaN
20140904-PurClathDigest-1ug-01	1914	1822	23.58	0.67005	193.94	313490	2983800	0	-5.8833	1	6.397	48.62	48.62	77.39	73.72	1.737	0	1.737	0	0	0.1063	0	0	NaN	NaN	NaN	NaN
20140904-PurClathDigest-1ug-01	1915	1823	23.591	0.65002	192.48	359670	3079400	0	-5.8856	1	6.385	48.57	48.57	77.38	73.71	1.736	0	1.736	0	0	0.1075	0	0	NaN	NaN	NaN	NaN
20140904-PurClathDigest-1ug-01	1916	1824	23.602	0.65998	202.85	318740	3016400	0	-5.8878	1	6.373	48.53	48.53	77.36	73.69	1.735	0	1.735	0	0	0.1086	0	0	NaN	NaN	NaN	NaN
20140904-PurClathDigest-1ug-01	1917	1825	23.613	0.64007	180.38	334240	3154000	0	-5.89	1	6.36	48.49	48.49	77.34	73.68	1.735	0	1.735	0	0	0.1098	0	0	NaN	NaN	NaN	NaN
20140904-PurClathDigest-1ug-01	1918	1826	23.623	0.6498	189	348790	3080400	0	-5.8922	1	6.348	48.44	48.44	77.32	73.66	1.734	0	1.734	0	0	0.1109	0	0	NaN	NaN	NaN	NaN
20140904-PurClathDigest-1ug-01	1919	1827	23.634	0.64018	182.34	370200	3379000	0	-5.8944	1	6.336	48.4	48.4	77.3	73.65	1.734	0	1.734	0	0	0.1121	0	0	NaN	NaN	NaN	NaN
20140904-PurClathDigest-1ug-01	1920	1828	23.645	0.66982	204.87	307510	2887000	0	-5.8966	1	6.325	48.36	48.36	77.28	73.63	1.733	0	1.733	0	0	0.1132	0	0	NaN	NaN	NaN	NaN
20140904-PurClathDigest-1ug-01	1921	1829	23.656	0.66021	196.19	310680	2928700	0	-5.8989	1	6.312	48.32	48.32	77.26	73.62	1.732	0	1.732	0	0	0.1144	0	0	NaN	NaN	NaN	NaN
20140904-PurClathDigest-1ug-01	1922	1830	23.667	0.64018	175.63	357690	3203700	0	-5.9011	1	6.3	48.27	48.27	77.25	73.6	1.732	0	1.732	0	0	0.1156	0	0	NaN	NaN	NaN	NaN
20140904-PurClathDigest-1ug-01	1923	1831	23.678	0.67978	196.66	311350	2966900	0	-5.9033	1	6.288	48.23	48.23	77.23	73.59	1.731	0	1.731	0	0	0.1167	0	0	NaN	NaN	NaN	NaN
20140904-PurClathDigest-1ug-01	1924	1832	23.689	0.65987	198.73	366580	3116300	0	-5.9056	1	6.275	48.19	48.19	77.21	73.57	1.731	0	1.731	0	0	0.1179	0	0	NaN	NaN	NaN	NaN
20140904-PurClathDigest-1ug-01	1925	1833	23.7	0.67005	201.89	311930	2978700	0	-5.9078	1	6.263	48.14	48.14	77.19	73.56	1.73	0	1.73	0	0	0.1191	0	0	NaN	NaN	NaN	NaN
20140904-PurClathDigest-1ug-01	1926	1834	23.711	0.67005	204.89	311100	2909400	0	-5.9101	1	6.251	48.1	48.1	77.17	73.54	1.73	0	1.73	0	0	0.1202	0	0	NaN	NaN	NaN	NaN
20140904-PurClathDigest-1ug-01	1927	1835	23.722	0.65002	192.83	323480	3017600	0	-5.9124	1	6.238	48.05	48.05	77.15	73.52	1.729	0	1.729	0	0	0.1214	0	0	NaN	NaN	NaN	NaN
20140904-PurClathDigest-1ug-01	1928	1836	23.733	0.65002	191.58	316190	3028200	0	-5.9146	1	6.226	48.01	48.01	77.13	73.51	1.728	0	1.728	0	0	0.1226	0	0	NaN	NaN	NaN	NaN
20140904-PurClathDigest-1ug-01	1929	1837	23.744	0.66994	202.36	306550	2895000	0	-5.9168	1	6.214	47.97	47.97	77.12	73.49	1.728	0	1.728	0	0	0.1237	0	0	NaN	NaN	NaN	NaN
20140904-PurClathDigest-1ug-01	1930	1838	23.755	0.65987	203.98	299820	2895900	0	-5.9191	1	6.202	47.93	47.93	77.1	73.48	1.727	0	1.727	0	0	0.1249	0	0	NaN	NaN	NaN	NaN
20140904-PurClathDigest-1ug-01	1931	1839	23.766	0.65002	189.03	322870	3049300	0	-5.9213	1	6.19	47.88	47.88	77.08	73.46	1.727	0	1.727	0	0	0.1261	0	0	NaN	NaN	NaN	NaN
20140904-PurClathDigest-1ug-01	1932	1840	23.777	0.68001	201.56	300300	2899400	0	-5.9235	1	6.178	47.84	47.84	77.06	73.45	1.726	0	1.726	0	0	0.1272	0	0	NaN	NaN	NaN	NaN
20140904-PurClathDigest-1ug-01	1933	1841	23.788	1.2005	183.8	386310	3292700	1	-5.9258	1	6.165	47.79	47.79	77.04	73.43	1.725	0	1.725	0	0	0.1284	0	0	NaN	NaN	NaN	NaN
20140904-PurClathDigest-1ug-01	1935	1842	23.808	1.23	217.31	298870	2843900	1	-5.9299	1	6.143	47.72	47.72	77.01	73.41	1.724	0	1.724	0	0	0.1305	0	0	NaN	NaN	NaN	NaN
20140904-PurClathDigest-1ug-01	1937	1843	23.829	1.2201	204.03	329480	3059400	1	-5.9341	1	6.12	47.63	47.63	76.97	73.38	1.723	0	1.723	0	0	0.1327	0	0	NaN	NaN	NaN	NaN
20140904-PurClathDigest-1ug-01	1939	1844	23.849	0.70953	247.32	289390	2663000	0	-5.9382	1	6.097	47.55	47.55	76.94	73.35	1.722	0	1.722	0	0	0.1348	0	0	NaN	NaN	NaN	NaN
20140904-PurClathDigest-1ug-01	1940	1845	23.861	0.67005	205.86	312100	2838700	0	-5.9406	1	6.082	47.31	47.31	76.89	73.3	1.726	0	1.726	0	0	0.1346	0	0	NaN	NaN	NaN	NaN
20140904-PurClathDigest-1ug-01	1941	1846	23.872	0.68001	212.96	284920	2756900	0	-5.9429	1	6.067	47.07	47.07	76.85	73.26	1.73	0	1.73	0	0	0.1343	0	0	NaN	NaN	NaN	NaN
20140904-PurClathDigest-1ug-01	1942	1847	23.884	0.60997	150.79	372130	3265000	0	-5.9452	1	6.052	46.82	46.82	76.81	73.21	1.734	0	1.734	0	0	0.134	0	0	NaN	NaN	NaN	NaN
20140904-PurClathDigest-1ug-01	1943	1848	23.894	0.65002	191	409780	3163100	0	-5.9473	1	6.038	46.6	46.6	76.77	73.17	1.737	0	1.737	0	0	0.1338	0	0	NaN	NaN	NaN	NaN
20140904-PurClathDigest-1ug-01	1944	1849	23.905	0.65987	198.87	332100	2974300	0	-5.9495	1	6.024	46.36	46.36	76.73	73.12	1.741	0	1.741	0	0	0.1335	0	0	NaN	NaN	NaN	NaN
20140904-PurClathDigest-1ug-01	1945	1850	23.916	0.65002	193.9	318820	2929200	0	-5.9517	1	6.009	46.12	46.12	76.69	73.07	1.745	0	1.745	0	0	0.1332	0	0	NaN	NaN	NaN	NaN
20140904-PurClathDigest-1ug-01	1946	1851	23.926	0.6601	202.7	411820	3116100	0	-5.9539	1	5.995	45.89	45.89	76.64	73.03	1.748	0	1.748	0	0	0.1329	0	0	NaN	NaN	NaN	NaN
20140904-PurClathDigest-1ug-01	1947	1852	23.937	0.65998	194.45	350990	3002100	0	-5.9562	1	5.98	45.65	45.65	76.6	72.98	1.752	0	1.752	0	0	0.1326	0	0	NaN	NaN	NaN	NaN
20140904-PurClathDigest-1ug-01	1948	1853	23.948	0.64018	177.23	369140	3230100	0	-5.9584	1	5.966	45.41	45.41	76.56	72.94	1.756	0	1.756	0	0	0.1323	0	0	NaN	NaN	NaN	NaN
20140904-PurClathDigest-1ug-01	1949	1854	23.959	0.65071	192.84	315870	3086400	0	-5.9606	1	5.951	45.17	45.17	76.52	72.89	1.76	0	1.76	0	0	0.132	0	0	NaN	NaN	NaN	NaN
20140904-PurClathDigest-1ug-01	1950	1855	23.97	0.62908	171.25	399270	3465500	0	-5.9628	1	5.937	44.94	44.94	76.48	72.84	1.763	0	1.763	0	0	0.1317	0	0	NaN	NaN	NaN	NaN
20140904-PurClathDigest-1ug-01	1951	1856	23.98	0.62004	161.88	411270	3533000	0	-5.9649	1	5.923	44.71	44.71	76.44	72.8	1.767	0	1.767	0	0	0.1315	0	0	NaN	NaN	NaN	NaN
20140904-PurClathDigest-1ug-01	1952	1857	23.991	0.63995	178.58	333700	3122000	0	-5.967	1	5.909	44.48	44.48	76.4	72.76	1.771	0	1.771	0	0	0.1312	0	0	NaN	NaN	NaN	NaN
20140904-PurClathDigest-1ug-01	1953	1858	24.001	0.67005	205.64	317780	2940400	0	-5.9692	1	5.895	44.25	44.25	76.36	72.71	1.774	0	1.774	0	0	0.1309	0	0	NaN	NaN	NaN	NaN
20140904-PurClathDigest-1ug-01	1954	1859	24.013	0.63995	174.43	360010	3250000	0	-5.9715	1	5.88	44.01	44.01	76.31	72.67	1.778	0	1.778	0	0	0.1306	0	0	NaN	NaN	NaN	NaN
20140904-PurClathDigest-1ug-01	1955	1860	24.023	0.65002	185.63	378700	3250100	0	-5.9736	1	5.866	43.78	43.78	76.27	72.62	1.782	0	1.782	0	0	0.1303	0	0	NaN	NaN	NaN	NaN
20140904-PurClathDigest-1ug-01	1956	1861	24.034	0.65998	200.3	321280	2882800	0	-5.9758	1	5.852	43.54	43.54	76.23	72.57	1.786	0	1.786	0	0	0.1301	0	0	NaN	NaN	NaN	NaN
20140904-PurClathDigest-1ug-01	1957	1862	24.045	0.67989	194.02	387270	3212600	0	-5.9781	1	5.837	43.3	43.3	76.19	72.53	1.789	0	1.789	0	0	0.1298	0	0	NaN	NaN	NaN	NaN
20140904-PurClathDigest-1ug-01	1958	1863	24.056	0.6601	197.8	334340	2995900	0	-5.9804	1	5.822	43.05	43.05	76.14	72.48	1.793	0	1.793	0	0	0.1295	0	0	NaN	NaN	NaN	NaN
20140904-PurClathDigest-1ug-01	1959	1864	24.067	0.64991	185.47	336090	3033500	0	-5.9826	1	5.807	42.81	42.81	76.1	72.43	1.797	0	1.797	0	0	0.1292	0	0	NaN	NaN	NaN	NaN
20140904-PurClathDigest-1ug-01	1960	1865	24.078	0.68012	203.96	307510	2847400	0	-5.9848	1	5.793	42.58	42.58	76.06	72.39	1.801	0	1.801	0	0	0.1289	0	0	NaN	NaN	NaN	NaN
20140904-PurClathDigest-1ug-01	1961	1866	24.09	0.65987	202.36	358530	3026400	0	-5.9872	1	5.778	42.33	42.33	76.02	72.34	1.805	0	1.805	0	0	0.1286	0	0	NaN	NaN	NaN	NaN
20140904-PurClathDigest-1ug-01	1962	1867	24.101	0.6601	194.23	359860	2946000	0	-5.9894	1	5.763	42.09	42.09	75.98	72.3	1.808	0	1.808	0	0	0.1283	0	0	NaN	NaN	NaN	NaN
20140904-PurClathDigest-1ug-01	1963	1868	24.112	0.66994	192.38	368200	3157900	0	-5.9916	1	5.749	41.85	41.85	75.93	72.25	1.812	0	1.812	0	0	0.128	0	0	NaN	NaN	NaN	NaN
20140904-PurClathDigest-1ug-01	1964	1869	24.123	0.62004	161.47	431260	3367400	0	-5.9939	1	5.734	41.61	41.61	75.89	72.2	1.816	0	1.816	0	0	0.1277	0	0	NaN	NaN	NaN	NaN
20140904-PurClathDigest-1ug-01	1965	1870	24.133	0.6601	200.43	321860	2925300	0	-5.996	1	5.72	41.38	41.38	75.85	72.16	1.82	0	1.82	0	0	0.1274	0	0	NaN	NaN	NaN	NaN
20140904-PurClathDigest-1ug-01	1966	1871	24.144	0.65998	200.45	297210	2799400	0	-5.9983	1	5.705	41.14	41.14	75.81	72.11	1.823	0	1.823	0	0	0.1271	0	0	NaN	NaN	NaN	NaN
20140904-PurClathDigest-1ug-01	1967	1872	24.155	0.68001	222.74	272510	2670900	0	-6.0005	1	5.705	40.91	40.91	75.79	72.09	1.823	0	1.823	0	0	0.1274	0	0	NaN	NaN	NaN	NaN
20140904-PurClathDigest-1ug-01	1968	1873	24.166	0.62004	155.19	483630	3530000	0	-6.0028	1	5.721	40.67	40.67	75.8	72.1	1.818	0	1.818	0	0	0.1283	0	0	NaN	NaN	NaN	NaN
20140904-PurClathDigest-1ug-01	1969	1874	24.177	1.2004	185.74	363750	3247900	1	-6.0049	1	5.736	40.46	40.46	75.8	72.11	1.813	0	1.813	0	0	0.1291	0	0	NaN	NaN	NaN	NaN
20140904-PurClathDigest-1ug-01	1971	1875	24.197	0.69958	237.63	299020	2639700	0	-6.009	1	5.764	40.04	40.04	75.82	72.13	1.804	0	1.804	0	0	0.1307	0	0	NaN	NaN	NaN	NaN
20140904-PurClathDigest-1ug-01	1972	1876	24.208	0.67005	210.24	354230	2957100	0	-6.0114	1	5.781	39.8	39.8	75.82	72.14	1.799	0	1.799	0	0	0.1316	0	0	NaN	NaN	NaN	NaN
20140904-PurClathDigest-1ug-01	1973	1877	24.22	1.1505	137.04	492400	3687300	1	-6.0136	1	5.796	39.57	39.57	75.83	72.15	1.794	0	1.794	0	0	0.1325	0	0	NaN	NaN	NaN	NaN
20140904-PurClathDigest-1ug-01	1975	1878	24.239	0.67944	224.57	358110	2973400	0	-6.0175	1	5.824	39.17	39.17	75.84	72.16	1.785	0	1.785	0	0	0.134	0	0	NaN	NaN	NaN	NaN
20140904-PurClathDigest-1ug-01	1976	1879	24.25	0.62988	170.26	366830	3186100	0	-6.0198	1	5.84	38.94	38.94	75.85	72.17	1.78	0	1.78	0	0	0.1349	0	0	NaN	NaN	NaN	NaN
20140904-PurClathDigest-1ug-01	1977	1880	24.261	0.68012	209.98	313350	2921400	0	-6.022	1	5.855	38.72	38.72	75.86	72.18	1.776	0	1.776	0	0	0.1358	0	0	NaN	NaN	NaN	NaN
20140904-PurClathDigest-1ug-01	1978	1881	24.272	0.65002	187.89	382490	3271200	0	-6.0243	1	5.871	38.48	38.48	75.87	72.19	1.771	0	1.771	0	0	0.1367	0	0	NaN	NaN	NaN	NaN
20140904-PurClathDigest-1ug-01	1979	1882	24.283	0.6601	196.19	321590	2972900	0	-6.0265	1	5.886	38.26	38.26	75.87	72.2	1.766	0	1.766	0	0	0.1375	0	0	NaN	NaN	NaN	NaN
20140904-PurClathDigest-1ug-01	1980	1883	24.294	1.1903	175.04	373110	3297800	1	-6.0287	1	5.902	38.03	38.03	75.88	72.21	1.761	0	1.761	0	0	0.1384	0	0	NaN	NaN	NaN	NaN
20140904-PurClathDigest-1ug-01	1982	1884	24.314	0.68951	231.66	306930	2774000	0	-6.0328	1	5.93	37.62	37.62	75.89	72.23	1.752	0	1.752	0	0	0.14	0	0	NaN	NaN	NaN	NaN
20140904-PurClathDigest-1ug-01	1983	1885	24.325	0.6601	199.49	349170	3011300	0	-6.0351	1	5.947	37.38	37.38	75.9	72.24	1.747	0	1.747	0	0	0.1409	0	0	NaN	NaN	NaN	NaN
20140904-PurClathDigest-1ug-01	1984	1886	24.336	1.1904	171.99	377300	3471100	1	-6.0374	1	5.962	37.15	37.15	75.91	72.25	1.742	0	1.742	0	0	0.1418	0	0	NaN	NaN	NaN	NaN
20140904-PurClathDigest-1ug-01	1986	1887	24.356	1.2199	208.61	323760	2980000	1	-6.0414	1	5.99	36.74	36.74	75.92	72.27	1.733	0	1.733	0	0	0.1433	0	0	NaN	NaN	NaN	NaN
20140904-PurClathDigest-1ug-01	1988	1888	24.376	0.73963	263.86	273030	2557000	0	-6.0455	1	6.019	36.31	36.31	75.94	72.28	1.724	0	1.724	0	0	0.1449	0	0	NaN	NaN	NaN	NaN
20140904-PurClathDigest-1ug-01	1989	1889	24.389	0.60997	140.38	469320	3662900	0	-6.048	1	6.037	36.06	36.06	75.94	72.3	1.718	0	1.718	0	0	0.1459	0	0	NaN	NaN	NaN	NaN
20140904-PurClathDigest-1ug-01	1990	1890	24.399	0.65998	203.39	339730	3009300	0	-6.0501	1	6.051	35.85	35.85	75.95	72.3	1.714	0	1.714	0	0	0.1467	0	0	NaN	NaN	NaN	NaN
20140904-PurClathDigest-1ug-01	1991	1891	24.41	0.67005	208.49	305290	2844800	0	-6.0524	1	6.067	35.62	35.62	75.96	72.31	1.709	0	1.709	0	0	0.1476	0	0	NaN	NaN	NaN	NaN
20140904-PurClathDigest-1ug-01	1992	1892	24.421	0.62988	165.42	413380	3381200	0	-6.0546	1	6.083	35.39	35.39	75.96	72.32	1.704	0	1.704	0	0	0.1485	0	0	NaN	NaN	NaN	NaN
20140904-PurClathDigest-1ug-01	1993	1893	24.431	0.68035	212.66	308770	2822700	0	-6.0568	1	6.098	35.17	35.17	75.97	72.33	1.699	0	1.699	0	0	0.1493	0	0	NaN	NaN	NaN	NaN
20140904-PurClathDigest-1ug-01	1994	1894	24.443	0.67989	214.43	289210	2751600	0	-6.0591	1	6.114	34.93	34.93	75.98	72.34	1.694	0	1.694	0	0	0.1502	0	0	NaN	NaN	NaN	NaN
20140904-PurClathDigest-1ug-01	1995	1895	24.454	0.65987	193.69	394420	3148200	0	-6.0614	1	6.124	34.84	34.84	75.99	72.35	1.691	0	1.691	0	0	0.1508	0	0	NaN	NaN	NaN	NaN
20140904-PurClathDigest-1ug-01	1996	1896	24.465	0.67989	216.12	331940	2824600	0	-6.0636	1	6.123	35	35	76	72.37	1.692	0	1.692	0	0	0.1508	0	0	NaN	NaN	NaN	NaN
20140904-PurClathDigest-1ug-01	1997	1897	24.476	0.64018	179.21	336000	2962400	0	-6.0659	1	6.122	35.17	35.17	76.02	72.38	1.693	0	1.693	0	0	0.1508	0	0	NaN	NaN	NaN	NaN
20140904-PurClathDigest-1ug-01	1998	1898	24.487	0.66982	213.77	298930	2742200	0	-6.0681	1	6.121	35.32	35.32	76.04	72.4	1.694	0	1.694	0	0	0.1508	0	0	NaN	NaN	NaN	NaN
20140904-PurClathDigest-1ug-01	1999	1899	24.498	0.67005	208.29	293790	2821600	0	-6.0704	1	6.12	35.49	35.49	76.05	72.41	1.696	0	1.696	0	0	0.1508	0	0	NaN	NaN	NaN	NaN
20140904-PurClathDigest-1ug-01	2000	1900	24.509	0.68012	216.52	338890	2930500	0	-6.0727	1	6.119	35.65	35.65	76.07	72.42	1.697	0	1.697	0	0	0.1508	0	0	NaN	NaN	NaN	NaN
20140904-PurClathDigest-1ug-01	2001	1901	24.521	0.68001	218.24	306710	2889300	0	-6.075	1	6.118	35.82	35.82	76.08	72.44	1.698	0	1.698	0	0	0.1508	0	0	NaN	NaN	NaN	NaN
20140904-PurClathDigest-1ug-01	2002	1902	24.532	0.60986	146.69	378620	3498900	0	-6.0773	1	6.117	35.98	35.98	76.1	72.45	1.699	0	1.699	0	0	0.1508	0	0	NaN	NaN	NaN	NaN
20140904-PurClathDigest-1ug-01	2003	1903	24.542	0.6601	202.18	337450	3011100	0	-6.0793	1	6.116	36.13	36.13	76.11	72.47	1.7	0	1.7	0	0	0.1508	0	0	NaN	NaN	NaN	NaN
20140904-PurClathDigest-1ug-01	2004	1904	24.553	0.65987	200.08	319200	2943600	0	-6.0816	1	6.115	36.29	36.29	76.13	72.48	1.701	0	1.701	0	0	0.1508	0	0	NaN	NaN	NaN	NaN
20140904-PurClathDigest-1ug-01	2005	1905	24.564	0.69008	217.34	280120	2676700	0	-6.0838	1	6.114	36.45	36.45	76.14	72.49	1.703	0	1.703	0	0	0.1508	0	0	NaN	NaN	NaN	NaN
20140904-PurClathDigest-1ug-01	2006	1906	24.576	0.70004	232.54	288630	2616200	0	-6.0862	1	6.113	36.62	36.62	76.16	72.51	1.704	0	1.704	0	0	0.1508	0	0	NaN	NaN	NaN	NaN
20140904-PurClathDigest-1ug-01	2007	1907	24.587	0.70999	246.51	277010	2530600	0	-6.0885	1	6.112	36.79	36.79	76.17	72.52	1.705	0	1.705	0	0	0.1508	0	0	NaN	NaN	NaN	NaN
20140904-PurClathDigest-1ug-01	2008	1908	24.599	0.65998	194.24	335470	2991600	0	-6.091	1	6.111	36.96	36.96	76.19	72.54	1.706	0	1.706	0	0	0.1508	0	0	NaN	NaN	NaN	NaN
20140904-PurClathDigest-1ug-01	2009	1909	24.61	0.64007	172.51	509270	3413000	0	-6.0932	1	6.11	37.12	37.12	76.2	72.55	1.707	0	1.707	0	0	0.1508	0	0	NaN	NaN	NaN	NaN
20140904-PurClathDigest-1ug-01	2010	1910	24.621	0.66982	210.44	305950	2953000	0	-6.0954	1	6.11	37.28	37.28	76.22	72.57	1.709	0	1.709	0	0	0.1508	0	0	NaN	NaN	NaN	NaN
20140904-PurClathDigest-1ug-01	2011	1911	24.632	0.68012	214.88	296720	2748300	0	-6.0976	1	6.109	37.44	37.44	76.23	72.58	1.71	0	1.71	0	0	0.1508	0	0	NaN	NaN	NaN	NaN
20140904-PurClathDigest-1ug-01	2012	1912	24.643	0.69008	221.75	322280	2791800	0	-6.0999	1	6.108	37.61	37.61	76.25	72.59	1.711	0	1.711	0	0	0.1508	0	0	NaN	NaN	NaN	NaN
20140904-PurClathDigest-1ug-01	2013	1913	24.655	0.68985	226.77	321640	2756200	0	-6.1023	1	6.107	37.78	37.78	76.27	72.61	1.712	0	1.712	0	0	0.1508	0	0	NaN	NaN	NaN	NaN
20140904-PurClathDigest-1ug-01	2014	1914	24.666	0.64007	182.84	356740	3078000	0	-6.1046	1	6.106	37.94	37.94	76.28	72.62	1.713	0	1.713	0	0	0.1508	0	0	NaN	NaN	NaN	NaN
20140904-PurClathDigest-1ug-01	2015	1915	24.677	0.7299	243.78	259550	2481800	0	-6.1068	1	6.105	38.1	38.1	76.3	72.64	1.715	0	1.715	0	0	0.1508	0	0	NaN	NaN	NaN	NaN
20140904-PurClathDigest-1ug-01	2016	1916	24.689	1.2405	218.95	303280	2783000	1	-6.1093	1	6.104	38.28	38.28	76.31	72.65	1.716	0	1.716	0	0	0.1508	0	0	NaN	NaN	NaN	NaN
20140904-PurClathDigest-1ug-01	2018	1917	24.71	0.72956	256.97	286370	2640200	0	-6.1135	1	6.102	38.58	38.58	76.34	72.68	1.718	0	1.718	0	0	0.1508	0	0	NaN	NaN	NaN	NaN
20140904-PurClathDigest-1ug-01	2019	1918	24.722	0.63	165.14	420810	3430800	0	-6.116	1	6.101	38.76	38.76	76.36	72.69	1.719	0	1.719	0	0	0.1508	0	0	NaN	NaN	NaN	NaN
20140904-PurClathDigest-1ug-01	2020	1919	24.733	1.2302	209.51	334190	2932100	1	-6.1181	1	6.1	38.91	38.91	76.37	72.71	1.72	0	1.72	0	0	0.1508	0	0	NaN	NaN	NaN	NaN
20140904-PurClathDigest-1ug-01	2022	1920	24.753	0.72968	265.42	268120	2478200	0	-6.1223	1	6.102	39.1	39.1	76.39	72.72	1.723	0	1.723	0	0	0.1509	0	0	NaN	NaN	NaN	NaN
20140904-PurClathDigest-1ug-01	2023	1921	24.765	0.70999	242.31	276520	2638100	0	-6.1248	1	6.114	38.85	38.85	76.35	72.68	1.724	0	1.724	0	0	0.1512	0	0	NaN	NaN	NaN	NaN
20140904-PurClathDigest-1ug-01	2024	1922	24.777	0.69008	231.24	286330	2696800	0	-6.1272	1	6.126	38.61	38.61	76.32	72.64	1.726	0	1.726	0	0	0.1515	0	0	NaN	NaN	NaN	NaN
20140904-PurClathDigest-1ug-01	2025	1923	24.789	0.69008	226.07	273190	2681200	0	-6.1295	1	6.138	38.37	38.37	76.29	72.6	1.727	0	1.727	0	0	0.1518	0	0	NaN	NaN	NaN	NaN
20140904-PurClathDigest-1ug-01	2026	1924	24.8	0.67989	217.14	302620	2808300	0	-6.1319	1	6.15	38.13	38.13	76.26	72.57	1.729	0	1.729	0	0	0.1521	0	0	NaN	NaN	NaN	NaN
20140904-PurClathDigest-1ug-01	2027	1925	24.811	0.68001	203.61	356410	3136000	0	-6.1342	1	6.162	37.9	37.9	76.23	72.53	1.73	0	1.73	0	0	0.1524	0	0	NaN	NaN	NaN	NaN
20140904-PurClathDigest-1ug-01	2028	1926	24.823	1.1604	152.01	476700	3838100	1	-6.1365	1	6.173	37.66	37.66	76.2	72.49	1.732	0	1.732	0	0	0.1527	0	0	NaN	NaN	NaN	NaN
20140904-PurClathDigest-1ug-01	2030	1927	24.842	1.21	192.53	322930	3018200	1	-6.1404	1	6.193	37.26	37.26	76.14	72.43	1.734	0	1.734	0	0	0.1532	0	0	NaN	NaN	NaN	NaN
20140904-PurClathDigest-1ug-01	2032	1928	24.862	1.2701	255.07	271300	2532600	1	-6.1445	1	6.214	36.84	36.84	76.09	72.36	1.737	0	1.737	0	0	0.1538	0	0	NaN	NaN	NaN	NaN
20140904-PurClathDigest-1ug-01	2034	1929	24.883	0.72956	265.98	262390	2532400	0	-6.1488	1	6.236	36.41	36.41	76.03	72.29	1.74	0	1.74	0	0	0.1543	0	0	NaN	NaN	NaN	NaN
20140904-PurClathDigest-1ug-01	2035	1930	24.896	0.68996	223.38	288480	2686300	0	-6.1513	1	6.249	36.15	36.15	76	72.25	1.741	0	1.741	0	0	0.1546	0	0	NaN	NaN	NaN	NaN
20140904-PurClathDigest-1ug-01	2036	1931	24.907	0.69992	229.93	283950	2661500	0	-6.1536	1	6.26	35.92	35.92	75.96	72.21	1.743	0	1.743	0	0	0.1549	0	0	NaN	NaN	NaN	NaN
20140904-PurClathDigest-1ug-01	2037	1932	24.919	0.67017	207.27	305650	2805200	0	-6.156	1	6.272	35.67	35.67	75.93	72.18	1.745	0	1.745	0	0	0.1553	0	0	NaN	NaN	NaN	NaN
20140904-PurClathDigest-1ug-01	2038	1933	24.93	0.70015	238.66	324300	2786700	0	-6.1583	1	6.284	35.44	35.44	75.9	72.14	1.746	0	1.746	0	0	0.1556	0	0	NaN	NaN	NaN	NaN
20140904-PurClathDigest-1ug-01	2039	1934	24.942	0.68985	232.1	286010	2694100	0	-6.1607	1	6.296	35.2	35.2	75.87	72.1	1.748	0	1.748	0	0	0.1559	0	0	NaN	NaN	NaN	NaN
20140904-PurClathDigest-1ug-01	2040	1935	24.953	0.68985	222.52	287740	2752500	0	-6.163	1	6.308	34.96	34.96	75.84	72.06	1.749	0	1.749	0	0	0.1562	0	0	NaN	NaN	NaN	NaN
20140904-PurClathDigest-1ug-01	2041	1936	24.965	0.68012	223.77	345570	2880700	0	-6.1654	1	6.32	34.73	34.73	75.81	72.03	1.751	0	1.751	0	0	0.1565	0	0	NaN	NaN	NaN	NaN
20140904-PurClathDigest-1ug-01	2042	1937	24.976	0.66994	211.95	305770	2872400	0	-6.1677	1	6.331	34.49	34.49	75.78	71.99	1.752	0	1.752	0	0	0.1568	0	0	NaN	NaN	NaN	NaN
20140904-PurClathDigest-1ug-01	2043	1938	24.987	0.69008	227.22	291640	2780600	0	-6.1699	1	6.343	34.26	34.26	75.74	71.95	1.754	0	1.754	0	0	0.1571	0	0	NaN	NaN	NaN	NaN
20140904-PurClathDigest-1ug-01	2044	1939	24.999	0.70004	239.99	266040	2599200	0	-6.1723	1	6.355	34.02	34.02	75.71	71.91	1.755	0	1.755	0	0	0.1574	0	0	NaN	NaN	NaN	NaN
20140904-PurClathDigest-1ug-01	2045	1940	25.01	0.71011	227.24	283660	2734800	0	-6.1747	1	6.367	33.78	33.78	75.68	71.88	1.757	0	1.757	0	0	0.1577	0	0	NaN	NaN	NaN	NaN
20140904-PurClathDigest-1ug-01	2046	1941	25.022	0.68974	221.24	276510	2685300	0	-6.1771	1	6.379	33.54	33.54	75.65	71.84	1.758	0	1.758	0	0	0.158	0	0	NaN	NaN	NaN	NaN
20140904-PurClathDigest-1ug-01	2047	1942	25.034	0.68012	215.05	301900	2828600	0	-6.1794	1	6.391	33.3	33.3	75.62	71.8	1.76	0	1.76	0	0	0.1583	0	0	NaN	NaN	NaN	NaN
20140904-PurClathDigest-1ug-01	2048	1943	25.045	0.70004	235.9	290100	2751700	0	-6.1817	1	6.403	33.06	33.06	75.59	71.76	1.761	0	1.761	0	0	0.1586	0	0	NaN	NaN	NaN	NaN
20140904-PurClathDigest-1ug-01	2049	1944	25.057	0.65998	195	351010	3070300	0	-6.1841	1	6.413	32.99	32.99	75.57	71.74	1.764	0	1.764	0	0	0.1589	0	0	NaN	NaN	NaN	NaN
20140904-PurClathDigest-1ug-01	2050	1945	25.068	0.65998	194.5	333610	3081800	0	-6.1863	1	6.42	33.03	33.03	75.58	71.74	1.767	0	1.767	0	0	0.1592	0	0	NaN	NaN	NaN	NaN
20140904-PurClathDigest-1ug-01	2051	1946	25.079	0.70999	231.44	290270	2712000	0	-6.1886	1	6.428	33.08	33.08	75.58	71.74	1.77	0	1.77	0	0	0.1595	0	0	NaN	NaN	NaN	NaN
20140904-PurClathDigest-1ug-01	2052	1947	25.09	0.68996	225.05	283380	2723300	0	-6.191	1	6.437	33.13	33.13	75.58	71.73	1.774	0	1.774	0	0	0.1598	0	0	NaN	NaN	NaN	NaN
20140904-PurClathDigest-1ug-01	2053	1948	25.102	0.64991	187.05	303550	2967300	0	-6.1933	1	6.445	33.18	33.18	75.59	71.73	1.777	0	1.777	0	0	0.1601	0	0	NaN	NaN	NaN	NaN
20140904-PurClathDigest-1ug-01	2054	1949	25.113	0.67005	209.67	428410	3248900	0	-6.1955	1	6.453	33.22	33.22	75.59	71.73	1.78	0	1.78	0	0	0.1604	0	0	NaN	NaN	NaN	NaN
20140904-PurClathDigest-1ug-01	2055	1950	25.124	0.69008	223.78	290740	2879300	0	-6.1978	1	6.461	33.27	33.27	75.59	71.72	1.783	0	1.783	0	0	0.1607	0	0	NaN	NaN	NaN	NaN
20140904-PurClathDigest-1ug-01	2056	1951	25.135	0.64018	182.24	347090	3188900	0	-6.2002	1	6.469	33.32	33.32	75.6	71.72	1.787	0	1.787	0	0	0.161	0	0	NaN	NaN	NaN	NaN
20140904-PurClathDigest-1ug-01	2057	1952	25.146	0.63972	173.88	339410	3232200	0	-6.2023	1	6.477	33.36	33.36	75.6	71.72	1.79	0	1.79	0	0	0.1613	0	0	NaN	NaN	NaN	NaN
20140904-PurClathDigest-1ug-01	2058	1953	25.157	0.65002	191.27	360330	3244600	0	-6.2045	1	6.484	33.41	33.41	75.61	71.71	1.793	0	1.793	0	0	0.1616	0	0	NaN	NaN	NaN	NaN
20140904-PurClathDigest-1ug-01	2059	1954	25.168	0.60997	145.41	445290	3730900	0	-6.2067	1	6.492	33.45	33.45	75.61	71.71	1.796	0	1.796	0	0	0.1618	0	0	NaN	NaN	NaN	NaN
20140904-PurClathDigest-1ug-01	2060	1955	25.178	0.65002	187.89	457720	3443800	0	-6.2088	1	6.499	33.49	33.49	75.61	71.71	1.799	0	1.799	0	0	0.1621	0	0	NaN	NaN	NaN	NaN
20140904-PurClathDigest-1ug-01	2061	1956	25.189	0.61008	148.2	467070	3778600	0	-6.211	1	6.507	33.54	33.54	75.62	71.7	1.802	0	1.802	0	0	0.1624	0	0	NaN	NaN	NaN	NaN
20140904-PurClathDigest-1ug-01	2062	1957	25.199	1.2305	207.18	310570	2857100	1	-6.213	1	6.514	33.58	33.58	75.62	71.7	1.805	0	1.805	0	0	0.1627	0	0	NaN	NaN	NaN	NaN
20140904-PurClathDigest-1ug-01	2064	1958	25.219	0.64957	184.13	399500	3252200	0	-6.2172	1	6.529	33.67	33.67	75.63	71.69	1.811	0	1.811	0	0	0.1632	0	0	NaN	NaN	NaN	NaN
20140904-PurClathDigest-1ug-01	2065	1959	25.23	0.64991	189.06	339090	3099100	0	-6.2194	1	6.536	33.71	33.71	75.63	71.69	1.814	0	1.814	0	0	0.1635	0	0	NaN	NaN	NaN	NaN
20140904-PurClathDigest-1ug-01	2066	1960	25.241	0.64991	184.92	362740	3155200	0	-6.2216	1	6.544	33.76	33.76	75.63	71.69	1.817	0	1.817	0	0	0.1638	0	0	NaN	NaN	NaN	NaN
20140904-PurClathDigest-1ug-01	2067	1961	25.252	1.2106	198.66	407100	3235800	1	-6.2238	1	6.552	33.81	33.81	75.64	71.68	1.821	0	1.821	0	0	0.1641	0	0	NaN	NaN	NaN	NaN
20140904-PurClathDigest-1ug-01	2069	1962	25.272	0.72945	273.29	265350	2492000	0	-6.228	1	6.566	33.89	33.89	75.64	71.68	1.826	0	1.826	0	0	0.1646	0	0	NaN	NaN	NaN	NaN
20140904-PurClathDigest-1ug-01	2070	1963	25.284	0.69008	228.55	304920	2752700	0	-6.2304	1	6.575	33.94	33.94	75.65	71.67	1.83	0	1.83	0	0	0.1649	0	0	NaN	NaN	NaN	NaN
20140904-PurClathDigest-1ug-01	2071	1964	25.296	1.2005	186.82	451820	3356000	1	-6.2328	1	6.583	33.99	33.99	75.65	71.67	1.833	0	1.833	0	0	0.1652	0	0	NaN	NaN	NaN	NaN
20140904-PurClathDigest-1ug-01	2073	1965	25.316	0.71949	263.27	267660	2568000	0	-6.2368	1	6.598	34.07	34.07	75.66	71.66	1.839	0	1.839	0	0	0.1658	0	0	NaN	NaN	NaN	NaN
20140904-PurClathDigest-1ug-01	2074	1966	25.328	0.67005	210.5	346540	3086200	0	-6.2393	1	6.606	34.12	34.12	75.66	71.66	1.843	0	1.843	0	0	0.1661	0	0	NaN	NaN	NaN	NaN
20140904-PurClathDigest-1ug-01	2075	1967	25.339	0.68001	218.98	291110	2778600	0	-6.2416	1	6.614	34.17	34.17	75.66	71.65	1.846	0	1.846	0	0	0.1664	0	0	NaN	NaN	NaN	NaN
20140904-PurClathDigest-1ug-01	2076	1968	25.35	1.2404	224.25	296270	2779000	1	-6.2439	1	6.622	34.22	34.22	75.67	71.65	1.849	0	1.849	0	0	0.1667	0	0	NaN	NaN	NaN	NaN
20140904-PurClathDigest-1ug-01	2078	1969	25.371	1.2999	285.17	249730	2434300	1	-6.2481	1	6.626	34.38	34.38	75.67	71.66	1.851	0	1.851	0	0	0.165	0	0	NaN	NaN	NaN	NaN
20140904-PurClathDigest-1ug-01	2080	1970	25.392	0.7196	257.68	294000	2753500	0	-6.2525	1	6.63	34.56	34.56	75.68	71.67	1.854	0	1.854	0	0	0.1633	0	0	NaN	NaN	NaN	NaN
20140904-PurClathDigest-1ug-01	2081	1971	25.404	0.68001	221.86	331060	2838800	0	-6.2549	1	6.632	34.65	34.65	75.69	71.68	1.855	0	1.855	0	0	0.1623	0	0	NaN	NaN	NaN	NaN
20140904-PurClathDigest-1ug-01	2082	1972	25.416	0.70026	240.15	282470	2713900	0	-6.2572	1	6.634	34.74	34.74	75.69	71.68	1.856	0	1.856	0	0	0.1615	0	0	NaN	NaN	NaN	NaN
20140904-PurClathDigest-1ug-01	2083	1973	25.427	0.66982	199.63	326010	3017600	0	-6.2596	1	6.636	34.84	34.84	75.7	71.69	1.857	0	1.857	0	0	0.1605	0	0	NaN	NaN	NaN	NaN
20140904-PurClathDigest-1ug-01	2084	1974	25.439	0.68996	224.26	316230	2917100	0	-6.2619	1	6.638	34.92	34.92	75.7	71.69	1.859	0	1.859	0	0	0.1596	0	0	NaN	NaN	NaN	NaN
20140904-PurClathDigest-1ug-01	2085	1975	25.45	0.66994	206.48	343920	3024800	0	-6.2642	1	6.64	35.02	35.02	75.7	71.7	1.86	0	1.86	0	0	0.1587	0	0	NaN	NaN	NaN	NaN
20140904-PurClathDigest-1ug-01	2086	1976	25.461	0.68001	214.66	320910	2940400	0	-6.2665	1	6.642	35.1	35.1	75.71	71.7	1.861	0	1.861	0	0	0.1578	0	0	NaN	NaN	NaN	NaN
20140904-PurClathDigest-1ug-01	2087	1977	25.473	0.68001	216.73	287650	2790800	0	-6.2688	1	6.644	35.19	35.19	75.71	71.71	1.862	0	1.862	0	0	0.1569	0	0	NaN	NaN	NaN	NaN
20140904-PurClathDigest-1ug-01	2088	1978	25.484	0.68996	229.61	316600	2804900	0	-6.2711	1	6.646	35.28	35.28	75.72	71.71	1.863	0	1.863	0	0	0.156	0	0	NaN	NaN	NaN	NaN
20140904-PurClathDigest-1ug-01	2089	1979	25.495	0.67005	204.9	316430	2956800	0	-6.2735	1	6.649	35.38	35.38	75.72	71.72	1.865	0	1.865	0	0	0.1551	0	0	NaN	NaN	NaN	NaN
20140904-PurClathDigest-1ug-01	2090	1980	25.507	0.69008	229.8	281930	2742400	0	-6.2757	1	6.651	35.47	35.47	75.72	71.72	1.866	0	1.866	0	0	0.1542	0	0	NaN	NaN	NaN	NaN
20140904-PurClathDigest-1ug-01	2091	1981	25.518	0.69981	232.64	379410	2918600	0	-6.2781	1	6.653	35.56	35.56	75.73	71.73	1.867	0	1.867	0	0	0.1533	0	0	NaN	NaN	NaN	NaN
20140904-PurClathDigest-1ug-01	2092	1982	25.53	0.68001	221.76	298760	2812900	0	-6.2805	1	6.655	35.65	35.65	75.73	71.73	1.868	0	1.868	0	0	0.1524	0	0	NaN	NaN	NaN	NaN
20140904-PurClathDigest-1ug-01	2093	1983	25.541	0.64007	181.46	357500	3143500	0	-6.2828	1	6.657	35.74	35.74	75.74	71.74	1.869	0	1.869	0	0	0.1515	0	0	NaN	NaN	NaN	NaN
20140904-PurClathDigest-1ug-01	2094	1984	25.552	0.63011	164.19	399270	3453100	0	-6.2849	1	6.659	35.83	35.83	75.74	71.74	1.871	0	1.871	0	0	0.1507	0	0	NaN	NaN	NaN	NaN
20140904-PurClathDigest-1ug-01	2095	1985	25.562	0.63995	178.02	324860	3100600	0	-6.2871	1	6.661	35.91	35.91	75.75	71.75	1.872	0	1.872	0	0	0.1498	0	0	NaN	NaN	NaN	NaN
20140904-PurClathDigest-1ug-01	2096	1986	25.573	0.70004	240.06	271250	2635400	0	-6.2893	1	6.663	35.99	35.99	75.75	71.75	1.873	0	1.873	0	0	0.149	0	0	NaN	NaN	NaN	NaN
20140904-PurClathDigest-1ug-01	2097	1987	25.585	0.66994	204.95	318190	2958000	0	-6.2916	1	6.665	36.09	36.09	75.75	71.76	1.874	0	1.874	0	0	0.1481	0	0	NaN	NaN	NaN	NaN
20140904-PurClathDigest-1ug-01	2098	1988	25.596	0.69992	233.65	306830	2778600	0	-6.2939	1	6.667	36.18	36.18	75.76	71.76	1.875	0	1.875	0	0	0.1472	0	0	NaN	NaN	NaN	NaN
20140904-PurClathDigest-1ug-01	2099	1989	25.607	0.68996	228.8	275310	2687000	0	-6.2963	1	6.669	36.27	36.27	75.76	71.77	1.876	0	1.876	0	0	0.1462	0	0	NaN	NaN	NaN	NaN
20140904-PurClathDigest-1ug-01	2100	1990	25.619	0.67017	208.55	300390	2832500	0	-6.2986	1	6.671	36.36	36.36	75.77	71.77	1.878	0	1.878	0	0	0.1453	0	0	NaN	NaN	NaN	NaN
20140904-PurClathDigest-1ug-01	2101	1991	25.63	0.69992	234.41	262590	2610000	0	-6.3009	1	6.673	36.45	36.45	75.77	71.78	1.879	0	1.879	0	0	0.1444	0	0	NaN	NaN	NaN	NaN
20140904-PurClathDigest-1ug-01	2102	1992	25.642	0.68996	227.29	279280	2749500	0	-6.3033	1	6.675	36.54	36.54	75.77	71.78	1.88	0	1.88	0	0	0.1435	0	0	NaN	NaN	NaN	NaN
20140904-PurClathDigest-1ug-01	2103	1993	25.653	0.71011	252.74	269640	2545600	0	-6.3056	1	6.68	36.65	36.65	75.76	71.77	1.881	0	1.881	0	0	0.143	0	0	NaN	NaN	NaN	NaN
20140904-PurClathDigest-1ug-01	2104	1994	25.665	0.65998	199.32	309530	2977100	0	-6.308	1	6.694	36.8	36.8	75.7	71.71	1.88	0	1.88	0	0	0.1437	0	0	NaN	NaN	NaN	NaN
20140904-PurClathDigest-1ug-01	2105	1995	25.676	0.70004	236.3	278200	2723700	0	-6.3103	1	6.707	36.93	36.93	75.65	71.66	1.879	0	1.879	0	0	0.1442	0	0	NaN	NaN	NaN	NaN
20140904-PurClathDigest-1ug-01	2106	1996	25.688	0.68985	225.21	291580	2816300	0	-6.3126	1	6.72	37.08	37.08	75.59	71.6	1.878	0	1.878	0	0	0.1449	0	0	NaN	NaN	NaN	NaN
20140904-PurClathDigest-1ug-01	2107	1997	25.699	0.68996	230.29	299630	2834700	0	-6.315	1	6.733	37.22	37.22	75.54	71.54	1.877	0	1.877	0	0	0.1455	0	0	NaN	NaN	NaN	NaN
20140904-PurClathDigest-1ug-01	2108	1998	25.711	1.2405	218.17	306050	2929400	1	-6.3173	1	6.746	37.37	37.37	75.48	71.49	1.876	0	1.876	0	0	0.1461	0	0	NaN	NaN	NaN	NaN
[truncated: 8,802 more rows]
