# Supplementary material for: The ∼16 kDa C-Terminal Sequence of Clathrin Assembly Protein AP180 Is Essential for Efficient Clathrin Binding
Source: PLoS One. 2014 Oct 20;9(10):e110557. doi: 10.1371/journal.pone.0110557 (PMC4203807; doi:10.1371/journal.pone.0110557)
Supplement: Data S2 — Contains the tabulated output of the MaxQuant software from processing the LC-MS/MS data of the tryptic digestion of purified clathrin. (ZIP) [file pone.0110557.s003.zip › txt/mzRange.txt]

Raw file	m/z	Peaks / Da	Single peaks / Da	Isotope patterns / Da	Single isotope patterns / Da	SILAC pairs / Da	Identified SILAC pairs / Da	SILAC identification rate [%]	MS/MS / Da	Identified MS/MS / Da	Identification rate [%]
20140904-PurClathDigest-1ug-01	140	0	0	0	0	0	0	NaN	0	0
20140904-PurClathDigest-1ug-01	141	0	0	0	0	0	0	NaN	0	0
20140904-PurClathDigest-1ug-01	142	0	0	0	0	0	0	NaN	0	0
20140904-PurClathDigest-1ug-01	143	0	0	0	0	0	0	NaN	0	0
20140904-PurClathDigest-1ug-01	144	0	0	0	0	0	0	NaN	0	0
20140904-PurClathDigest-1ug-01	145	0	0	0	0	0	0	NaN	0	0
20140904-PurClathDigest-1ug-01	146	0	0	0	0	0	0	NaN	0	0
20140904-PurClathDigest-1ug-01	147	0	0	0	0	0	0	NaN	0	0
20140904-PurClathDigest-1ug-01	148	0	0	0	0	0	0	NaN	0	0
20140904-PurClathDigest-1ug-01	149	0	0	0	0	0	0	NaN	0	0
20140904-PurClathDigest-1ug-01	150	0	0	0	0	0	0	NaN	0	0
20140904-PurClathDigest-1ug-01	151	0	0	0	0	0	0	NaN	0	0
20140904-PurClathDigest-1ug-01	152	0	0	0	0	0	0	NaN	0	0
20140904-PurClathDigest-1ug-01	153	0	0	0	0	0	0	NaN	0	0
20140904-PurClathDigest-1ug-01	154	0	0	0	0	0	0	NaN	0	0
20140904-PurClathDigest-1ug-01	155	0	0	0	0	0	0	NaN	0	0
20140904-PurClathDigest-1ug-01	156	0	0	0	0	0	0	NaN	0	0
20140904-PurClathDigest-1ug-01	157	0	0	0	0	0	0	NaN	0	0
20140904-PurClathDigest-1ug-01	158	0	0	0	0	0	0	NaN	0	0
20140904-PurClathDigest-1ug-01	159	0	0	0	0	0	0	NaN	0	0
20140904-PurClathDigest-1ug-01	160	0	0	0	0	0	0	NaN	0	0
20140904-PurClathDigest-1ug-01	161	0	0	0	0	0	0	NaN	0	0
20140904-PurClathDigest-1ug-01	162	0	0	0	0	0	0	NaN	0	0
20140904-PurClathDigest-1ug-01	163	0	0	0	0	0	0	NaN	0	0
20140904-PurClathDigest-1ug-01	164	0	0	0	0	0	0	NaN	0	0
20140904-PurClathDigest-1ug-01	165	0	0	0	0	0	0	NaN	0	0
20140904-PurClathDigest-1ug-01	166	0	0	0	0	0	0	NaN	0	0
20140904-PurClathDigest-1ug-01	167	0	0	0	0	0	0	NaN	0	0
20140904-PurClathDigest-1ug-01	168	0	0	0	0	0	0	NaN	0	0
20140904-PurClathDigest-1ug-01	169	0	0	0	0	0	0	NaN	0	0
20140904-PurClathDigest-1ug-01	170	0	0	0	0	0	0	NaN	0	0
20140904-PurClathDigest-1ug-01	171	0	0	0	0	0	0	NaN	0	0
20140904-PurClathDigest-1ug-01	172	0	0	0	0	0	0	NaN	0	0
20140904-PurClathDigest-1ug-01	173	0	0	0	0	0	0	NaN	0	0
20140904-PurClathDigest-1ug-01	174	0	0	0	0	0	0	NaN	0	0
20140904-PurClathDigest-1ug-01	175	0	0	0	0	0	0	NaN	0	0
20140904-PurClathDigest-1ug-01	176	0	0	0	0	0	0	NaN	0	0
20140904-PurClathDigest-1ug-01	177	0	0	0	0	0	0	NaN	0	0
20140904-PurClathDigest-1ug-01	178	0	0	0	0	0	0	NaN	0	0
20140904-PurClathDigest-1ug-01	179	0	0	0	0	0	0	NaN	0	0
20140904-PurClathDigest-1ug-01	180	0	0	0	0	0	0	NaN	0	0
20140904-PurClathDigest-1ug-01	181	0	0	0	0	0	0	NaN	0	0
20140904-PurClathDigest-1ug-01	182	0	0	0	0	0	0	NaN	0	0
20140904-PurClathDigest-1ug-01	183	0	0	0	0	0	0	NaN	0	0
20140904-PurClathDigest-1ug-01	184	0	0	0	0	0	0	NaN	0	0
20140904-PurClathDigest-1ug-01	185	0	0	0	0	0	0	NaN	0	0
20140904-PurClathDigest-1ug-01	186	0	0	0	0	0	0	NaN	0	0
20140904-PurClathDigest-1ug-01	187	0	0	0	0	0	0	NaN	0	0
20140904-PurClathDigest-1ug-01	188	0	0	0	0	0	0	NaN	0	0
20140904-PurClathDigest-1ug-01	189	0	0	0	0	0	0	NaN	0	0
20140904-PurClathDigest-1ug-01	190	0	0	0	0	0	0	NaN	0	0
20140904-PurClathDigest-1ug-01	191	0	0	0	0	0	0	NaN	0	0
20140904-PurClathDigest-1ug-01	192	0	0	0	0	0	0	NaN	0	0
20140904-PurClathDigest-1ug-01	193	0	0	0	0	0	0	NaN	0	0
20140904-PurClathDigest-1ug-01	194	0	0	0	0	0	0	NaN	0	0
20140904-PurClathDigest-1ug-01	195	0	0	0	0	0	0	NaN	0	0
20140904-PurClathDigest-1ug-01	196	0	0	0	0	0	0	NaN	0	0
20140904-PurClathDigest-1ug-01	197	0	0	0	0	0	0	NaN	0	0
20140904-PurClathDigest-1ug-01	198	0	0	0	0	0	0	NaN	0	0
20140904-PurClathDigest-1ug-01	199	0	0	0	0	0	0	NaN	0	0
20140904-PurClathDigest-1ug-01	200	0	0	0	0	0	0	NaN	0	0
20140904-PurClathDigest-1ug-01	201	0	0	0	0	0	0	NaN	0	0
20140904-PurClathDigest-1ug-01	202	0	0	0	0	0	0	NaN	0	0
20140904-PurClathDigest-1ug-01	203	0	0	0	0	0	0	NaN	0	0
20140904-PurClathDigest-1ug-01	204	0	0	0	0	0	0	NaN	0	0
20140904-PurClathDigest-1ug-01	205	0	0	0	0	0	0	NaN	0	0
20140904-PurClathDigest-1ug-01	206	0	0	0	0	0	0	NaN	0	0
20140904-PurClathDigest-1ug-01	207	0	0	0	0	0	0	NaN	0	0
20140904-PurClathDigest-1ug-01	208	0	0	0	0	0	0	NaN	0	0
20140904-PurClathDigest-1ug-01	209	0	0	0	0	0	0	NaN	0	0
20140904-PurClathDigest-1ug-01	210	0	0	0	0	0	0	NaN	0	0
20140904-PurClathDigest-1ug-01	211	0	0	0	0	0	0	NaN	0	0
20140904-PurClathDigest-1ug-01	212	0	0	0	0	0	0	NaN	0	0
20140904-PurClathDigest-1ug-01	213	0	0	0	0	0	0	NaN	0	0
20140904-PurClathDigest-1ug-01	214	0	0	0	0	0	0	NaN	0	0
20140904-PurClathDigest-1ug-01	215	0	0	0	0	0	0	NaN	0	0
20140904-PurClathDigest-1ug-01	216	0	0	0	0	0	0	NaN	0	0
20140904-PurClathDigest-1ug-01	217	0	0	0	0	0	0	NaN	0	0
20140904-PurClathDigest-1ug-01	218	0	0	0	0	0	0	NaN	0	0
20140904-PurClathDigest-1ug-01	219	0	0	0	0	0	0	NaN	0	0
20140904-PurClathDigest-1ug-01	220	0	0	0	0	0	0	NaN	0	0
20140904-PurClathDigest-1ug-01	221	0	0	0	0	0	0	NaN	0	0
20140904-PurClathDigest-1ug-01	222	0	0	0	0	0	0	NaN	0	0
20140904-PurClathDigest-1ug-01	223	0	0	0	0	0	0	NaN	0	0
20140904-PurClathDigest-1ug-01	224	0	0	0	0	0	0	NaN	0	0
20140904-PurClathDigest-1ug-01	225	0	0	0	0	0	0	NaN	0	0
20140904-PurClathDigest-1ug-01	226	0	0	0	0	0	0	NaN	0	0
20140904-PurClathDigest-1ug-01	227	0	0	0	0	0	0	NaN	0	0
20140904-PurClathDigest-1ug-01	228	0	0	0	0	0	0	NaN	0	0
20140904-PurClathDigest-1ug-01	229	0	0	0	0	0	0	NaN	0	0
20140904-PurClathDigest-1ug-01	230	0	0	0	0	0	0	NaN	0	0
20140904-PurClathDigest-1ug-01	231	67.53	2.847	4.721	0	0.2361	0.0025	1.059	0.01393	0.0025	17.95
20140904-PurClathDigest-1ug-01	232	135.1	5.694	9.443	0	0.4721	0.005	1.059	0.02786	0.005	17.95
20140904-PurClathDigest-1ug-01	233	202.6	8.54	14.16	0	0.7082	0.0075	1.059	0.04179	0.0075	17.95
20140904-PurClathDigest-1ug-01	234	270.1	11.39	18.89	0	0.9443	0.01	1.059	0.05571	0.01	17.95
20140904-PurClathDigest-1ug-01	235	337.6	14.23	23.61	0	1.18	0.0125	1.059	0.06964	0.0125	17.95
20140904-PurClathDigest-1ug-01	236	405.2	17.08	28.33	0	1.416	0.015	1.059	0.08357	0.015	17.95
20140904-PurClathDigest-1ug-01	237	472.7	19.93	33.05	0	1.653	0.0175	1.059	0.0975	0.0175	17.95
20140904-PurClathDigest-1ug-01	238	540.2	22.77	37.77	0	1.889	0.02	1.059	0.1114	0.02	17.95
20140904-PurClathDigest-1ug-01	239	607.8	25.62	42.49	0	2.125	0.0225	1.059	0.1254	0.0225	17.95
20140904-PurClathDigest-1ug-01	240	675.3	28.47	47.21	0	2.361	0.025	1.059	0.1393	0.025	17.95
20140904-PurClathDigest-1ug-01	241	742.8	31.31	51.94	0	2.597	0.0275	1.059	0.1532	0.0275	17.95
20140904-PurClathDigest-1ug-01	242	810.3	34.16	56.66	0	2.833	0.03	1.059	0.1671	0.03	17.95
20140904-PurClathDigest-1ug-01	243	877.9	37.01	61.38	0	3.069	0.0325	1.059	0.1811	0.0325	17.95
20140904-PurClathDigest-1ug-01	244	945.4	39.86	66.1	0	3.305	0.035	1.059	0.195	0.035	17.95
20140904-PurClathDigest-1ug-01	245	1013	42.7	70.82	0	3.541	0.0375	1.059	0.2089	0.0375	17.95
20140904-PurClathDigest-1ug-01	246	1080	45.55	75.54	0	3.777	0.04	1.059	0.2229	0.04	17.95
20140904-PurClathDigest-1ug-01	247	1148	48.4	80.26	0	4.013	0.0425	1.059	0.2368	0.0425	17.95
20140904-PurClathDigest-1ug-01	248	1216	51.24	84.99	0	4.249	0.045	1.059	0.2507	0.045	17.95
20140904-PurClathDigest-1ug-01	249	1283	54.09	89.71	0	4.485	0.0475	1.059	0.2646	0.0475	17.95
20140904-PurClathDigest-1ug-01	250	1351	56.94	94.43	0	4.721	0.05	1.059	0.2786	0.05	17.95
20140904-PurClathDigest-1ug-01	251	1436	60.56	100.2	0	5.008	0.055	1.098	0.3029	0.05679	18.75
20140904-PurClathDigest-1ug-01	252	1522	64.18	105.9	0	5.294	0.06	1.133	0.3271	0.06357	19.43
20140904-PurClathDigest-1ug-01	253	1607	67.8	111.6	0	5.581	0.065	1.165	0.3514	0.07036	20.02
20140904-PurClathDigest-1ug-01	254	1693	71.42	117.3	0	5.867	0.07	1.193	0.3757	0.07714	20.53
20140904-PurClathDigest-1ug-01	255	1779	75.04	123.1	0	6.154	0.075	1.219	0.4	0.08393	20.98
20140904-PurClathDigest-1ug-01	256	1864	78.66	128.8	0	6.44	0.08	1.242	0.4243	0.09071	21.38
20140904-PurClathDigest-1ug-01	257	1950	82.29	134.5	0	6.726	0.085	1.264	0.4486	0.0975	21.74
20140904-PurClathDigest-1ug-01	258	2035	85.91	140.3	0	7.013	0.09	1.283	0.4729	0.1043	22.05
20140904-PurClathDigest-1ug-01	259	2121	89.53	146	0	7.299	0.095	1.301	0.4971	0.1111	22.34
20140904-PurClathDigest-1ug-01	260	2207	93.15	151.7	0	7.586	0.1	1.318	0.5214	0.1179	22.6
20140904-PurClathDigest-1ug-01	261	2292	96.77	157.4	0	7.872	0.105	1.334	0.5457	0.1246	22.84
20140904-PurClathDigest-1ug-01	262	2378	100.4	163.2	0	8.159	0.11	1.348	0.57	0.1314	23.06
20140904-PurClathDigest-1ug-01	263	2464	104	168.9	0	8.445	0.115	1.362	0.5943	0.1382	23.26
20140904-PurClathDigest-1ug-01	264	2549	107.6	174.6	0	8.731	0.12	1.374	0.6186	0.145	23.44
20140904-PurClathDigest-1ug-01	265	2635	111.3	180.4	0	9.018	0.125	1.386	0.6429	0.1518	23.61
20140904-PurClathDigest-1ug-01	266	2720	114.9	186.1	0	9.304	0.13	1.397	0.6671	0.1586	23.77
20140904-PurClathDigest-1ug-01	267	2806	118.5	191.8	0	9.591	0.135	1.408	0.6914	0.1654	23.92
20140904-PurClathDigest-1ug-01	268	2892	122.1	197.5	0	9.877	0.14	1.417	0.7157	0.1721	24.05
20140904-PurClathDigest-1ug-01	269	2977	125.7	203.3	0	10.16	0.145	1.427	0.74	0.1789	24.18
20140904-PurClathDigest-1ug-01	270	3063	129.4	209	0	10.45	0.15	1.435	0.7643	0.1857	24.3
20140904-PurClathDigest-1ug-01	271	3152	132.9	216.9	0	10.85	0.1561	1.439	0.79	0.1921	24.32
20140904-PurClathDigest-1ug-01	272	3242	136.5	224.9	0	11.24	0.1621	1.442	0.8157	0.1986	24.34
20140904-PurClathDigest-1ug-01	273	3331	140	232.8	0	11.64	0.1682	1.445	0.8414	0.205	24.36
20140904-PurClathDigest-1ug-01	274	3420	143.6	240.7	0	12.04	0.1743	1.448	0.8671	0.2114	24.38
20140904-PurClathDigest-1ug-01	275	3510	147.2	248.6	0	12.43	0.1804	1.451	0.8929	0.2179	24.4
20140904-PurClathDigest-1ug-01	276	3599	150.7	256.6	0	12.83	0.1864	1.453	0.9186	0.2243	24.42
20140904-PurClathDigest-1ug-01	277	3689	154.3	264.5	0	13.22	0.1925	1.456	0.9443	0.2307	24.43
20140904-PurClathDigest-1ug-01	278	3778	157.8	272.4	0	13.62	0.1986	1.458	0.97	0.2371	24.45
20140904-PurClathDigest-1ug-01	279	3868	161.4	280.4	0	14.02	0.2046	1.46	0.9957	0.2436	24.46
20140904-PurClathDigest-1ug-01	280	3957	165	288.3	0	14.41	0.2107	1.462	1.021	0.25	24.48
20140904-PurClathDigest-1ug-01	281	4046	168.5	296.2	0	14.81	0.2168	1.464	1.047	0.2564	24.49
20140904-PurClathDigest-1ug-01	282	4136	172.1	304.1	0	15.21	0.2229	1.465	1.073	0.2629	24.5
20140904-PurClathDigest-1ug-01	283	4225	175.6	312.1	0	15.6	0.2289	1.467	1.099	0.2693	24.51
20140904-PurClathDigest-1ug-01	284	4315	179.2	320	0	16	0.235	1.469	1.124	0.2757	24.52
20140904-PurClathDigest-1ug-01	285	4404	182.8	327.9	0	16.4	0.2411	1.47	1.15	0.2821	24.53
20140904-PurClathDigest-1ug-01	286	4493	186.3	335.9	0	16.79	0.2471	1.472	1.176	0.2886	24.54
20140904-PurClathDigest-1ug-01	287	4583	189.9	343.8	0	17.19	0.2532	1.473	1.201	0.295	24.55
20140904-PurClathDigest-1ug-01	288	4672	193.4	351.7	0	17.59	0.2593	1.474	1.227	0.3014	24.56
20140904-PurClathDigest-1ug-01	289	4762	197	359.6	0	17.98	0.2654	1.476	1.253	0.3079	24.57
20140904-PurClathDigest-1ug-01	290	4851	200.6	367.6	0	18.38	0.2714	1.477	1.279	0.3143	24.58
20140904-PurClathDigest-1ug-01	291	4935	203.8	375.6	0	18.78	0.2786	1.483	1.305	0.3221	24.69
20140904-PurClathDigest-1ug-01	292	5019	207	383.6	0	19.18	0.2857	1.489	1.331	0.33	24.79
20140904-PurClathDigest-1ug-01	293	5103	210.3	391.7	0	19.58	0.2929	1.495	1.358	0.3379	24.88
20140904-PurClathDigest-1ug-01	294	5188	213.5	399.7	0	19.99	0.3	1.501	1.384	0.3457	24.97
20140904-PurClathDigest-1ug-01	295	5272	216.8	407.8	0	20.39	0.3071	1.507	1.411	0.3536	25.06
20140904-PurClathDigest-1ug-01	296	5356	220	415.8	0	20.79	0.3143	1.512	1.437	0.3614	25.15
20140904-PurClathDigest-1ug-01	297	5440	223.2	423.8	0	21.19	0.3214	1.517	1.464	0.3693	25.23
20140904-PurClathDigest-1ug-01	298	5524	226.5	431.9	0	21.59	0.3286	1.522	1.49	0.3771	25.31
20140904-PurClathDigest-1ug-01	299	5608	229.7	439.9	0	21.99	0.3357	1.526	1.516	0.385	25.39
20140904-PurClathDigest-1ug-01	300	5692	232.9	447.9	0	22.4	0.3429	1.531	1.543	0.3929	25.46
20140904-PurClathDigest-1ug-01	301	5777	236.2	456	0	22.8	0.35	1.535	1.569	0.4007	25.53
20140904-PurClathDigest-1ug-01	302	5861	239.4	464	0	23.2	0.3571	1.539	1.596	0.4086	25.6
20140904-PurClathDigest-1ug-01	303	5945	242.7	472	0	23.6	0.3643	1.543	1.622	0.4164	25.67
20140904-PurClathDigest-1ug-01	304	6029	245.9	480.1	0	24	0.3714	1.547	1.649	0.4243	25.74
20140904-PurClathDigest-1ug-01	305	6113	249.1	488.1	0	24.41	0.3786	1.551	1.675	0.4321	25.8
20140904-PurClathDigest-1ug-01	306	6197	252.4	496.1	0	24.81	0.3857	1.555	1.701	0.44	25.86
20140904-PurClathDigest-1ug-01	307	6282	255.6	504.2	0	25.21	0.3929	1.558	1.728	0.4479	25.92
20140904-PurClathDigest-1ug-01	308	6366	258.8	512.2	0	25.61	0.4	1.562	1.754	0.4557	25.98
20140904-PurClathDigest-1ug-01	309	6450	262.1	520.2	0	26.01	0.4071	1.565	1.781	0.4636	26.03
20140904-PurClathDigest-1ug-01	310	6534	265.3	528.3	0	26.41	0.4143	1.568	1.807	0.4714	26.09
20140904-PurClathDigest-1ug-01	311	6605	268	535.3	0	26.76	0.4232	1.581	1.845	0.4818	26.11
20140904-PurClathDigest-1ug-01	312	6676	270.7	542.2	0	27.11	0.4321	1.594	1.883	0.4921	26.14
20140904-PurClathDigest-1ug-01	313	6747	273.4	549.2	0	27.46	0.4411	1.606	1.921	0.5025	26.16
20140904-PurClathDigest-1ug-01	314	6819	276.2	556.2	0	27.81	0.45	1.618	1.959	0.5129	26.19
20140904-PurClathDigest-1ug-01	315	6890	278.9	563.2	0	28.16	0.4589	1.63	1.996	0.5232	26.21
20140904-PurClathDigest-1ug-01	316	6961	281.6	570.2	0	28.51	0.4679	1.641	2.034	0.5336	26.23
20140904-PurClathDigest-1ug-01	317	7032	284.3	577.1	0	28.86	0.4768	1.652	2.072	0.5439	26.25
20140904-PurClathDigest-1ug-01	318	7103	287	584.1	0	29.21	0.4857	1.663	2.11	0.5543	26.27
20140904-PurClathDigest-1ug-01	319	7174	289.7	591.1	0	29.55	0.4946	1.674	2.148	0.5646	26.29
20140904-PurClathDigest-1ug-01	320	7245	292.4	598.1	0	29.9	0.5036	1.684	2.186	0.575	26.31
20140904-PurClathDigest-1ug-01	321	7316	295.1	605.1	0	30.25	0.5125	1.694	2.224	0.5854	26.33
20140904-PurClathDigest-1ug-01	322	7388	297.8	612	0	30.6	0.5214	1.704	2.261	0.5957	26.34
20140904-PurClathDigest-1ug-01	323	7459	300.5	619	0	30.95	0.5304	1.714	2.299	0.6061	26.36
20140904-PurClathDigest-1ug-01	324	7530	303.2	626	0	31.3	0.5393	1.723	2.337	0.6164	26.38
20140904-PurClathDigest-1ug-01	325	7601	305.9	633	0	31.65	0.5482	1.732	2.375	0.6268	26.39
20140904-PurClathDigest-1ug-01	326	7672	308.6	639.9	0	32	0.5571	1.741	2.413	0.6371	26.41
20140904-PurClathDigest-1ug-01	327	7743	311.3	646.9	0	32.35	0.5661	1.75	2.451	0.6475	26.42
20140904-PurClathDigest-1ug-01	328	7814	314.1	653.9	0	32.69	0.575	1.759	2.489	0.6579	26.44
20140904-PurClathDigest-1ug-01	329	7886	316.8	660.9	0	33.04	0.5839	1.767	2.526	0.6682	26.45
20140904-PurClathDigest-1ug-01	330	7957	319.5	667.9	0	33.39	0.5929	1.775	2.564	0.6786	26.46
20140904-PurClathDigest-1ug-01	331	8030	322.1	675.8	0	33.79	0.6089	1.802	2.614	0.7043	26.94
20140904-PurClathDigest-1ug-01	332	8102	324.7	683.7	0	34.18	0.625	1.828	2.664	0.73	27.4
20140904-PurClathDigest-1ug-01	333	8175	327.4	691.6	0	34.58	0.6411	1.854	2.714	0.7557	27.84
20140904-PurClathDigest-1ug-01	334	8248	330	699.5	0	34.98	0.6571	1.879	2.764	0.7814	28.27
20140904-PurClathDigest-1ug-01	335	8321	332.6	707.4	0	35.37	0.6732	1.903	2.814	0.8071	28.68
20140904-PurClathDigest-1ug-01	336	8394	335.3	715.3	0	35.77	0.6893	1.927	2.864	0.8329	29.08
20140904-PurClathDigest-1ug-01	337	8467	337.9	723.3	0	36.16	0.7054	1.951	2.914	0.8586	29.46
20140904-PurClathDigest-1ug-01	338	8539	340.6	731.2	0	36.56	0.7214	1.973	2.964	0.8843	29.83
20140904-PurClathDigest-1ug-01	339	8612	343.2	739.1	0	36.95	0.7375	1.996	3.014	0.91	30.19
20140904-PurClathDigest-1ug-01	340	8685	345.8	747	0	37.35	0.7536	2.018	3.064	0.9357	30.54
20140904-PurClathDigest-1ug-01	341	8758	348.5	754.9	0	37.75	0.7696	2.039	3.114	0.9614	30.87
20140904-PurClathDigest-1ug-01	342	8831	351.1	762.8	0	38.14	0.7857	2.06	3.164	0.9871	31.2
20140904-PurClathDigest-1ug-01	343	8903	353.7	770.7	0	38.54	0.8018	2.081	3.214	1.013	31.51
20140904-PurClathDigest-1ug-01	344	8976	356.4	778.7	0	38.93	0.8179	2.101	3.264	1.039	31.82
20140904-PurClathDigest-1ug-01	345	9049	359	786.6	0	39.33	0.8339	2.12	3.314	1.064	32.11
20140904-PurClathDigest-1ug-01	346	9122	361.6	794.5	0	39.72	0.85	2.14	3.364	1.09	32.4
20140904-PurClathDigest-1ug-01	347	9195	364.3	802.4	0	40.12	0.8661	2.159	3.414	1.116	32.68
20140904-PurClathDigest-1ug-01	348	9268	366.9	810.3	0	40.52	0.8821	2.177	3.464	1.141	32.95
20140904-PurClathDigest-1ug-01	349	9340	369.5	818.2	0	40.91	0.8982	2.196	3.514	1.167	33.21
20140904-PurClathDigest-1ug-01	350	9413	372.2	826.1	0	41.31	0.9143	2.213	3.564	1.193	33.47
20140904-PurClathDigest-1ug-01	351	9500	375.5	833.8	0	41.69	0.9289	2.228	3.621	1.211	33.44
20140904-PurClathDigest-1ug-01	352	9586	378.8	841.5	0	42.07	0.9436	2.243	3.678	1.229	33.4
20140904-PurClathDigest-1ug-01	353	9673	382.1	849.2	0	42.46	0.9582	2.257	3.735	1.246	33.37
20140904-PurClathDigest-1ug-01	354	9759	385.4	856.9	0	42.84	0.9729	2.271	3.791	1.264	33.35
20140904-PurClathDigest-1ug-01	355	9845	388.6	864.5	0	43.23	0.9875	2.284	3.848	1.282	33.32
20140904-PurClathDigest-1ug-01	356	9932	391.9	872.2	0	43.61	1.002	2.298	3.905	1.3	33.29
20140904-PurClathDigest-1ug-01	357	10020	395.2	879.9	0	43.99	1.017	2.311	3.962	1.318	33.26
20140904-PurClathDigest-1ug-01	358	10100	398.5	887.6	0	44.38	1.031	2.324	4.019	1.336	33.24
20140904-PurClathDigest-1ug-01	359	10190	401.8	895.2	0	44.76	1.046	2.337	4.075	1.354	33.21
20140904-PurClathDigest-1ug-01	360	10280	405.1	902.9	0	45.15	1.061	2.349	4.132	1.371	33.19
20140904-PurClathDigest-1ug-01	361	10360	408.4	910.6	0	45.53	1.075	2.362	4.189	1.389	33.17
20140904-PurClathDigest-1ug-01	362	10450	411.7	918.3	0	45.91	1.09	2.374	4.246	1.407	33.14
20140904-PurClathDigest-1ug-01	363	10540	415	926	0	46.3	1.105	2.386	4.302	1.425	33.12
20140904-PurClathDigest-1ug-01	364	10620	418.3	933.6	0	46.68	1.119	2.398	4.359	1.443	33.1
20140904-PurClathDigest-1ug-01	365	10710	421.6	941.3	0	47.07	1.134	2.409	4.416	1.461	33.08
20140904-PurClathDigest-1ug-01	366	10800	424.9	949	0	47.45	1.149	2.421	4.473	1.479	33.06
20140904-PurClathDigest-1ug-01	367	10880	428.2	956.7	0	47.83	1.163	2.432	4.53	1.496	33.04
20140904-PurClathDigest-1ug-01	368	10970	431.5	964.4	0	48.22	1.178	2.443	4.586	1.514	33.02
20140904-PurClathDigest-1ug-01	369	11060	434.7	972	0	48.6	1.193	2.454	4.643	1.532	33
20140904-PurClathDigest-1ug-01	370	11140	438	979.7	0	48.99	1.207	2.464	4.7	1.55	32.98
20140904-PurClathDigest-1ug-01	371	11160	438.4	983.4	0	49.17	1.22	2.481	4.74	1.566	33.05
20140904-PurClathDigest-1ug-01	372	11180	438.8	987	0	49.35	1.233	2.498	4.779	1.583	33.12
20140904-PurClathDigest-1ug-01	373	11200	439.2	990.6	0	49.53	1.246	2.515	4.819	1.599	33.19
20140904-PurClathDigest-1ug-01	374	11220	439.6	994.3	0	49.71	1.259	2.532	4.859	1.616	33.25
20140904-PurClathDigest-1ug-01	375	11230	440	997.9	0	49.9	1.271	2.548	4.898	1.632	33.32
20140904-PurClathDigest-1ug-01	376	11250	440.4	1002	0	50.08	1.284	2.565	4.938	1.649	33.39
20140904-PurClathDigest-1ug-01	377	11270	440.8	1005	0	50.26	1.297	2.581	4.977	1.665	33.45
20140904-PurClathDigest-1ug-01	378	11290	441.2	1009	0	50.44	1.31	2.597	5.017	1.681	33.51
20140904-PurClathDigest-1ug-01	379	11310	441.6	1012	0	50.62	1.323	2.613	5.057	1.698	33.58
20140904-PurClathDigest-1ug-01	380	11330	442	1016	0	50.81	1.336	2.629	5.096	1.714	33.64
20140904-PurClathDigest-1ug-01	381	11350	442.4	1020	0	50.99	1.349	2.645	5.136	1.731	33.7
20140904-PurClathDigest-1ug-01	382	11360	442.8	1023	0	51.17	1.361	2.661	5.176	1.747	33.76
20140904-PurClathDigest-1ug-01	383	11380	443.2	1027	0	51.35	1.374	2.676	5.215	1.764	33.81
20140904-PurClathDigest-1ug-01	384	11400	443.6	1031	0	51.54	1.387	2.692	5.255	1.78	33.87
20140904-PurClathDigest-1ug-01	385	11420	444	1034	0	51.72	1.4	2.707	5.295	1.796	33.93
20140904-PurClathDigest-1ug-01	386	11440	444.4	1038	0	51.9	1.413	2.722	5.334	1.813	33.99
20140904-PurClathDigest-1ug-01	387	11460	444.8	1042	0	52.08	1.426	2.737	5.374	1.829	34.04
20140904-PurClathDigest-1ug-01	388	11480	445.2	1045	0	52.26	1.439	2.752	5.414	1.846	34.09
20140904-PurClathDigest-1ug-01	389	11490	445.6	1049	0	52.45	1.451	2.767	5.453	1.862	34.15
20140904-PurClathDigest-1ug-01	390	11510	446	1053	0	52.63	1.464	2.782	5.493	1.879	34.2
20140904-PurClathDigest-1ug-01	391	11510	445.2	1055	0	52.76	1.472	2.79	5.53	1.892	34.21
20140904-PurClathDigest-1ug-01	392	11500	444.5	1058	0	52.9	1.48	2.798	5.566	1.905	34.22
20140904-PurClathDigest-1ug-01	393	11500	443.8	1061	0	53.03	1.488	2.806	5.603	1.918	34.23
20140904-PurClathDigest-1ug-01	394	11490	443	1063	0	53.17	1.496	2.813	5.64	1.931	34.25
20140904-PurClathDigest-1ug-01	395	11490	442.3	1066	0	53.3	1.504	2.821	5.677	1.945	34.26
20140904-PurClathDigest-1ug-01	396	11480	441.6	1069	0	53.44	1.511	2.828	5.714	1.958	34.27
20140904-PurClathDigest-1ug-01	397	11480	440.8	1071	0	53.57	1.519	2.836	5.75	1.971	34.28
20140904-PurClathDigest-1ug-01	398	11470	440.1	1074	0	53.71	1.527	2.843	5.787	1.984	34.29
20140904-PurClathDigest-1ug-01	399	11460	439.3	1077	0	53.84	1.535	2.851	5.824	1.997	34.3
20140904-PurClathDigest-1ug-01	400	11460	438.6	1080	0	53.98	1.543	2.858	5.861	2.011	34.31
20140904-PurClathDigest-1ug-01	401	11450	437.9	1082	0	54.11	1.551	2.866	5.897	2.024	34.32
20140904-PurClathDigest-1ug-01	402	11450	437.1	1085	0	54.25	1.559	2.873	5.934	2.037	34.33
20140904-PurClathDigest-1ug-01	403	11440	436.4	1088	0	54.38	1.566	2.88	5.971	2.05	34.34
20140904-PurClathDigest-1ug-01	404	11440	435.7	1090	0	54.52	1.574	2.888	6.008	2.064	34.35
20140904-PurClathDigest-1ug-01	405	11430	434.9	1093	0	54.65	1.582	2.895	6.045	2.077	34.36
20140904-PurClathDigest-1ug-01	406	11430	434.2	1096	0	54.79	1.59	2.902	6.081	2.09	34.37
20140904-PurClathDigest-1ug-01	407	11420	433.5	1098	0	54.92	1.598	2.909	6.118	2.103	34.38
20140904-PurClathDigest-1ug-01	408	11420	432.7	1101	0	55.06	1.606	2.916	6.155	2.116	34.39
20140904-PurClathDigest-1ug-01	409	11410	432	1104	0	55.19	1.614	2.923	6.192	2.13	34.39
20140904-PurClathDigest-1ug-01	410	11410	431.3	1107	0	55.33	1.621	2.931	6.229	2.143	34.4
20140904-PurClathDigest-1ug-01	411	11390	430.4	1108	0	55.38	1.628	2.939	6.267	2.154	34.37
20140904-PurClathDigest-1ug-01	412	11380	429.4	1109	0	55.44	1.634	2.948	6.306	2.165	34.33
20140904-PurClathDigest-1ug-01	413	11370	428.5	1110	0	55.49	1.641	2.957	6.344	2.176	34.3
20140904-PurClathDigest-1ug-01	414	11360	427.6	1111	0	55.55	1.647	2.965	6.383	2.187	34.27
20140904-PurClathDigest-1ug-01	415	11350	426.7	1112	0	55.6	1.654	2.974	6.421	2.198	34.23
20140904-PurClathDigest-1ug-01	416	11330	425.8	1113	0	55.66	1.66	2.983	6.46	2.209	34.2
20140904-PurClathDigest-1ug-01	417	11320	424.9	1114	0	55.71	1.666	2.991	6.499	2.22	34.17
20140904-PurClathDigest-1ug-01	418	11310	424	1115	0	55.77	1.673	3	6.537	2.231	34.13
20140904-PurClathDigest-1ug-01	419	11300	423	1116	0	55.82	1.679	3.008	6.576	2.242	34.1
20140904-PurClathDigest-1ug-01	420	11280	422.1	1118	0	55.87	1.686	3.017	6.614	2.254	34.07
20140904-PurClathDigest-1ug-01	421	11270	421.2	1119	0	55.93	1.692	3.025	6.653	2.265	34.04
20140904-PurClathDigest-1ug-01	422	11260	420.3	1120	0	55.98	1.699	3.034	6.691	2.276	34.01
20140904-PurClathDigest-1ug-01	423	11250	419.4	1121	0	56.04	1.705	3.043	6.73	2.287	33.98
20140904-PurClathDigest-1ug-01	424	11240	418.5	1122	0	56.09	1.711	3.051	6.769	2.298	33.95
20140904-PurClathDigest-1ug-01	425	11220	417.6	1123	0	56.15	1.718	3.06	6.807	2.309	33.92
20140904-PurClathDigest-1ug-01	426	11210	416.6	1124	0	56.2	1.724	3.068	6.846	2.32	33.89
20140904-PurClathDigest-1ug-01	427	11200	415.7	1125	0	56.26	1.731	3.076	6.884	2.331	33.86
20140904-PurClathDigest-1ug-01	428	11190	414.8	1126	0	56.31	1.737	3.085	6.923	2.342	33.83
20140904-PurClathDigest-1ug-01	429	11170	413.9	1127	0	56.37	1.744	3.093	6.961	2.353	33.8
20140904-PurClathDigest-1ug-01	430	11160	413	1128	0	56.42	1.75	3.102	7	2.364	33.78
20140904-PurClathDigest-1ug-01	431	11150	412.4	1129	0	56.46	1.761	3.119	7.04	2.378	33.78
20140904-PurClathDigest-1ug-01	432	11150	411.8	1130	0	56.5	1.772	3.137	7.079	2.391	33.78
20140904-PurClathDigest-1ug-01	433	11140	411.2	1131	0	56.54	1.783	3.154	7.119	2.405	33.78
20140904-PurClathDigest-1ug-01	434	11130	410.6	1132	0	56.58	1.794	3.171	7.159	2.419	33.79
20140904-PurClathDigest-1ug-01	435	11130	409.9	1132	0	56.62	1.805	3.189	7.198	2.432	33.79
20140904-PurClathDigest-1ug-01	436	11120	409.3	1133	0	56.66	1.816	3.206	7.238	2.446	33.79
20140904-PurClathDigest-1ug-01	437	11110	408.7	1134	0	56.7	1.828	3.223	7.277	2.459	33.79
20140904-PurClathDigest-1ug-01	438	11100	408.1	1135	0	56.74	1.839	3.241	7.317	2.473	33.8
20140904-PurClathDigest-1ug-01	439	11100	407.5	1136	0	56.77	1.85	3.258	7.357	2.486	33.8
20140904-PurClathDigest-1ug-01	440	11090	406.9	1136	0	56.81	1.861	3.275	7.396	2.5	33.8
20140904-PurClathDigest-1ug-01	441	11080	406.3	1137	0	56.85	1.872	3.292	7.436	2.514	33.8
20140904-PurClathDigest-1ug-01	442	11070	405.7	1138	0	56.89	1.883	3.309	7.476	2.527	33.8
20140904-PurClathDigest-1ug-01	443	11070	405.1	1139	0	56.93	1.894	3.327	7.515	2.541	33.81
20140904-PurClathDigest-1ug-01	444	11060	404.5	1139	0	56.97	1.905	3.344	7.555	2.554	33.81
20140904-PurClathDigest-1ug-01	445	11050	403.8	1140	0	57.01	1.916	3.361	7.595	2.568	33.81
20140904-PurClathDigest-1ug-01	446	11040	403.2	1141	0	57.05	1.927	3.378	7.634	2.581	33.81
20140904-PurClathDigest-1ug-01	447	11040	402.6	1142	0	57.09	1.938	3.395	7.674	2.595	33.82
20140904-PurClathDigest-1ug-01	448	11030	402	1143	0	57.13	1.949	3.412	7.714	2.609	33.82
20140904-PurClathDigest-1ug-01	449	11020	401.4	1143	0	57.17	1.96	3.429	7.753	2.622	33.82
20140904-PurClathDigest-1ug-01	450	11020	400.8	1144	0	57.21	1.971	3.446	7.793	2.636	33.82
20140904-PurClathDigest-1ug-01	451	11020	400.6	1147	0	57.34	1.98	3.453	7.836	2.652	33.85
20140904-PurClathDigest-1ug-01	452	11030	400.4	1150	0	57.48	1.989	3.461	7.879	2.669	33.88
20140904-PurClathDigest-1ug-01	453	11040	400.2	1152	0	57.62	1.998	3.468	7.922	2.686	33.9
20140904-PurClathDigest-1ug-01	454	11040	400	1155	0	57.75	2.007	3.475	7.966	2.703	33.93
20140904-PurClathDigest-1ug-01	455	11050	399.8	1158	0	57.89	2.016	3.483	8.009	2.72	33.96
20140904-PurClathDigest-1ug-01	456	11060	399.6	1161	0	58.03	2.025	3.49	8.052	2.736	33.98
20140904-PurClathDigest-1ug-01	457	11060	399.4	1163	0	58.16	2.034	3.497	8.095	2.753	34.01
20140904-PurClathDigest-1ug-01	458	11070	399.2	1166	0	58.3	2.043	3.504	8.139	2.77	34.04
20140904-PurClathDigest-1ug-01	459	11080	399	1169	0	58.43	2.052	3.511	8.182	2.787	34.06
20140904-PurClathDigest-1ug-01	460	11080	398.8	1171	0	58.57	2.061	3.518	8.225	2.804	34.09
20140904-PurClathDigest-1ug-01	461	11090	398.6	1174	0	58.71	2.07	3.525	8.268	2.82	34.11
20140904-PurClathDigest-1ug-01	462	11100	398.4	1177	0	58.84	2.079	3.532	8.311	2.837	34.14
20140904-PurClathDigest-1ug-01	463	11110	398.2	1180	0	58.98	2.088	3.539	8.355	2.854	34.16
20140904-PurClathDigest-1ug-01	464	11110	398	1182	0	59.12	2.096	3.546	8.398	2.871	34.18
20140904-PurClathDigest-1ug-01	465	11120	397.8	1185	0	59.25	2.105	3.553	8.441	2.887	34.21
20140904-PurClathDigest-1ug-01	466	11130	397.6	1188	0	59.39	2.114	3.56	8.484	2.904	34.23
20140904-PurClathDigest-1ug-01	467	11130	397.4	1191	0	59.53	2.123	3.567	8.527	2.921	34.25
20140904-PurClathDigest-1ug-01	468	11140	397.2	1193	0	59.66	2.132	3.574	8.571	2.938	34.28
20140904-PurClathDigest-1ug-01	469	11150	397	1196	0	59.8	2.141	3.58	8.614	2.955	34.3
20140904-PurClathDigest-1ug-01	470	11150	396.8	1199	0	59.94	2.15	3.587	8.657	2.971	34.32
20140904-PurClathDigest-1ug-01	471	11160	396.5	1200	0	60.01	2.15	3.583	8.681	2.967	34.18
20140904-PurClathDigest-1ug-01	472	11160	396.3	1202	0	60.08	2.151	3.58	8.705	2.963	34.04
20140904-PurClathDigest-1ug-01	473	11160	396	1203	0	60.15	2.151	3.576	8.729	2.959	33.89
20140904-PurClathDigest-1ug-01	474	11160	395.7	1204	0	60.22	2.151	3.572	8.753	2.954	33.75
20140904-PurClathDigest-1ug-01	475	11160	395.5	1206	0	60.3	2.152	3.569	8.777	2.95	33.61
20140904-PurClathDigest-1ug-01	476	11160	395.2	1207	0	60.37	2.152	3.565	8.801	2.946	33.47
20140904-PurClathDigest-1ug-01	477	11170	394.9	1209	0	60.44	2.152	3.561	8.825	2.941	33.33
20140904-PurClathDigest-1ug-01	478	11170	394.7	1210	0	60.51	2.153	3.558	8.849	2.937	33.19
20140904-PurClathDigest-1ug-01	479	11170	394.4	1212	0	60.58	2.153	3.554	8.872	2.933	33.06
20140904-PurClathDigest-1ug-01	480	11170	394.2	1213	0	60.66	2.154	3.55	8.896	2.929	32.92
20140904-PurClathDigest-1ug-01	481	11170	393.9	1215	0	60.73	2.154	3.547	8.92	2.924	32.78
20140904-PurClathDigest-1ug-01	482	11170	393.6	1216	0	60.8	2.154	3.543	8.944	2.92	32.65
20140904-PurClathDigest-1ug-01	483	11170	393.4	1217	0	60.87	2.155	3.54	8.968	2.916	32.51
20140904-PurClathDigest-1ug-01	484	11180	393.1	1219	0	60.95	2.155	3.536	8.992	2.911	32.38
20140904-PurClathDigest-1ug-01	485	11180	392.8	1220	0	61.02	2.155	3.532	9.016	2.907	32.24
20140904-PurClathDigest-1ug-01	486	11180	392.6	1222	0	61.09	2.156	3.529	9.04	2.903	32.11
20140904-PurClathDigest-1ug-01	487	11180	392.3	1223	0	61.16	2.156	3.525	9.064	2.899	31.98
20140904-PurClathDigest-1ug-01	488	11180	392	1225	0	61.23	2.156	3.522	9.088	2.894	31.85
20140904-PurClathDigest-1ug-01	489	11180	391.8	1226	0	61.31	2.157	3.518	9.112	2.89	31.72
20140904-PurClathDigest-1ug-01	490	11190	391.5	1228	0	61.38	2.157	3.514	9.136	2.886	31.59
20140904-PurClathDigest-1ug-01	491	11180	391	1230	0	61.49	2.164	3.52	9.172	2.899	31.61
20140904-PurClathDigest-1ug-01	492	11180	390.5	1232	0	61.6	2.171	3.525	9.208	2.913	31.63
20140904-PurClathDigest-1ug-01	493	11180	390	1234	0	61.71	2.179	3.53	9.244	2.926	31.66
20140904-PurClathDigest-1ug-01	494	11180	389.5	1236	0	61.82	2.186	3.536	9.28	2.94	31.68
20140904-PurClathDigest-1ug-01	495	11180	389	1239	0	61.93	2.193	3.541	9.316	2.954	31.7
20140904-PurClathDigest-1ug-01	496	11180	388.5	1241	0	62.04	2.2	3.546	9.352	2.967	31.73
20140904-PurClathDigest-1ug-01	497	11170	388	1243	0	62.15	2.207	3.551	9.388	2.981	31.75
20140904-PurClathDigest-1ug-01	498	11170	387.5	1245	0	62.26	2.214	3.556	9.424	2.994	31.77
20140904-PurClathDigest-1ug-01	499	11170	386.9	1247	0	62.37	2.221	3.562	9.46	3.008	31.79
20140904-PurClathDigest-1ug-01	500	11170	386.4	1250	0	62.48	2.229	3.567	9.496	3.021	31.82
20140904-PurClathDigest-1ug-01	501	11170	385.9	1252	0	62.59	2.236	3.572	9.532	3.035	31.84
20140904-PurClathDigest-1ug-01	502	11170	385.4	1254	0	62.7	2.243	3.577	9.569	3.049	31.86
20140904-PurClathDigest-1ug-01	503	11160	384.9	1256	0	62.81	2.25	3.582	9.605	3.062	31.88
20140904-PurClathDigest-1ug-01	504	11160	384.4	1258	0	62.92	2.257	3.587	9.641	3.076	31.9
20140904-PurClathDigest-1ug-01	505	11160	383.9	1261	0	63.03	2.264	3.592	9.677	3.089	31.92
20140904-PurClathDigest-1ug-01	506	11160	383.4	1263	0	63.14	2.271	3.597	9.713	3.103	31.95
20140904-PurClathDigest-1ug-01	507	11160	382.9	1265	0	63.25	2.279	3.602	9.749	3.116	31.97
20140904-PurClathDigest-1ug-01	508	11150	382.4	1267	0	63.36	2.286	3.607	9.785	3.13	31.99
20140904-PurClathDigest-1ug-01	509	11150	381.9	1270	0	63.48	2.293	3.612	9.821	3.144	32.01
20140904-PurClathDigest-1ug-01	510	11150	381.4	1272	0	63.59	2.3	3.617	9.857	3.157	32.03
20140904-PurClathDigest-1ug-01	511	11150	380.8	1273	0	63.66	2.304	3.619	9.889	3.164	32
20140904-PurClathDigest-1ug-01	512	11140	380.1	1275	0	63.73	2.308	3.622	9.92	3.171	31.96
20140904-PurClathDigest-1ug-01	513	11140	379.5	1276	0	63.8	2.312	3.624	9.951	3.177	31.93
20140904-PurClathDigest-1ug-01	514	11130	378.9	1277	0	63.87	2.316	3.626	9.983	3.184	31.9
20140904-PurClathDigest-1ug-01	515	11130	378.2	1279	0	63.94	2.32	3.628	10.01	3.191	31.87
20140904-PurClathDigest-1ug-01	516	11120	377.6	1280	0	64.01	2.324	3.63	10.05	3.198	31.83
20140904-PurClathDigest-1ug-01	517	11120	377	1282	0	64.08	2.327	3.632	10.08	3.205	31.8
20140904-PurClathDigest-1ug-01	518	11110	376.4	1283	0	64.15	2.331	3.635	10.11	3.211	31.77
20140904-PurClathDigest-1ug-01	519	11110	375.7	1284	0	64.22	2.335	3.637	10.14	3.218	31.74
20140904-PurClathDigest-1ug-01	520	11100	375.1	1286	0	64.29	2.339	3.639	10.17	3.225	31.71
20140904-PurClathDigest-1ug-01	521	11100	374.5	1287	0	64.36	2.343	3.641	10.2	3.232	31.68
20140904-PurClathDigest-1ug-01	522	11090	373.8	1289	0	64.43	2.347	3.643	10.23	3.239	31.64
20140904-PurClathDigest-1ug-01	523	11090	373.2	1290	0	64.5	2.351	3.645	10.27	3.245	31.61
20140904-PurClathDigest-1ug-01	524	11080	372.6	1291	0	64.57	2.355	3.647	10.3	3.252	31.58
20140904-PurClathDigest-1ug-01	525	11080	372	1293	0	64.64	2.359	3.65	10.33	3.259	31.55
20140904-PurClathDigest-1ug-01	526	11070	371.3	1294	0	64.71	2.363	3.652	10.36	3.266	31.52
20140904-PurClathDigest-1ug-01	527	11070	370.7	1296	0	64.78	2.367	3.654	10.39	3.272	31.49
20140904-PurClathDigest-1ug-01	528	11060	370.1	1297	0	64.85	2.371	3.656	10.42	3.279	31.46
20140904-PurClathDigest-1ug-01	529	11060	369.4	1298	0	64.92	2.375	3.658	10.45	3.286	31.43
20140904-PurClathDigest-1ug-01	530	11050	368.8	1300	0	64.99	2.379	3.66	10.49	3.293	31.4
20140904-PurClathDigest-1ug-01	531	11040	368.2	1300	0	64.99	2.379	3.661	10.5	3.295	31.4
20140904-PurClathDigest-1ug-01	532	11030	367.6	1300	0	64.99	2.379	3.661	10.51	3.298	31.39
20140904-PurClathDigest-1ug-01	533	11020	366.9	1300	0	64.99	2.38	3.662	10.52	3.3	31.39
20140904-PurClathDigest-1ug-01	534	11010	366.3	1300	0	64.99	2.38	3.662	10.53	3.303	31.38
20140904-PurClathDigest-1ug-01	535	11000	365.7	1300	0	64.99	2.38	3.663	10.54	3.305	31.37
20140904-PurClathDigest-1ug-01	536	10990	365	1300	0	64.99	2.381	3.663	10.55	3.308	31.37
20140904-PurClathDigest-1ug-01	537	10980	364.4	1300	0	64.99	2.381	3.664	10.56	3.31	31.36
20140904-PurClathDigest-1ug-01	538	10970	363.8	1300	0	64.99	2.381	3.665	10.57	3.313	31.35
20140904-PurClathDigest-1ug-01	539	10960	363.2	1300	0	64.99	2.382	3.665	10.58	3.315	31.35
20140904-PurClathDigest-1ug-01	540	10950	362.5	1300	0	64.99	2.382	3.666	10.59	3.318	31.34
20140904-PurClathDigest-1ug-01	541	10940	361.9	1300	0	64.99	2.382	3.666	10.6	3.32	31.34
20140904-PurClathDigest-1ug-01	542	10930	361.3	1300	0	64.99	2.383	3.667	10.61	3.323	31.33
20140904-PurClathDigest-1ug-01	543	10920	360.6	1300	0	64.99	2.383	3.667	10.62	3.325	31.32
20140904-PurClathDigest-1ug-01	544	10910	360	1300	0	64.99	2.384	3.668	10.63	3.328	31.32
20140904-PurClathDigest-1ug-01	545	10900	359.4	1300	0	64.99	2.384	3.668	10.64	3.33	31.31
20140904-PurClathDigest-1ug-01	546	10890	358.8	1300	0	64.99	2.384	3.669	10.65	3.333	31.31
20140904-PurClathDigest-1ug-01	547	10880	358.1	1300	0	64.99	2.385	3.669	10.66	3.335	31.3
20140904-PurClathDigest-1ug-01	548	10870	357.5	1300	0	64.99	2.385	3.67	10.67	3.338	31.3
20140904-PurClathDigest-1ug-01	549	10860	356.9	1300	0	64.99	2.385	3.671	10.68	3.34	31.29
20140904-PurClathDigest-1ug-01	550	10850	356.2	1300	0	64.99	2.386	3.671	10.69	3.343	31.28
20140904-PurClathDigest-1ug-01	551	10840	355.8	1298	0	64.92	2.387	3.677	10.68	3.341	31.27
20140904-PurClathDigest-1ug-01	552	10830	355.3	1297	0	64.85	2.389	3.683	10.68	3.339	31.26
20140904-PurClathDigest-1ug-01	553	10820	354.8	1296	0	64.79	2.39	3.689	10.68	3.336	31.25
20140904-PurClathDigest-1ug-01	554	10810	354.3	1294	0	64.72	2.391	3.695	10.67	3.334	31.24
20140904-PurClathDigest-1ug-01	555	10800	353.8	1293	0	64.66	2.393	3.701	10.67	3.332	31.24
20140904-PurClathDigest-1ug-01	556	10790	353.3	1292	0	64.59	2.394	3.707	10.66	3.33	31.23
20140904-PurClathDigest-1ug-01	557	10780	352.8	1290	0	64.52	2.396	3.713	10.66	3.328	31.22
20140904-PurClathDigest-1ug-01	558	10760	352.3	1289	0	64.46	2.397	3.719	10.66	3.326	31.21
20140904-PurClathDigest-1ug-01	559	10750	351.9	1288	0	64.39	2.399	3.725	10.65	3.324	31.2
20140904-PurClathDigest-1ug-01	560	10740	351.4	1286	0	64.32	2.4	3.731	10.65	3.321	31.19
20140904-PurClathDigest-1ug-01	561	10730	350.9	1285	0	64.26	2.401	3.737	10.65	3.319	31.18
20140904-PurClathDigest-1ug-01	562	10720	350.4	1284	0	64.19	2.403	3.743	10.64	3.317	31.17
20140904-PurClathDigest-1ug-01	563	10710	349.9	1283	0	64.13	2.404	3.749	10.64	3.315	31.16
20140904-PurClathDigest-1ug-01	564	10700	349.4	1281	0	64.06	2.406	3.755	10.64	3.313	31.15
20140904-PurClathDigest-1ug-01	565	10690	348.9	1280	0	63.99	2.407	3.761	10.63	3.311	31.14
20140904-PurClathDigest-1ug-01	566	10680	348.4	1279	0	63.93	2.409	3.768	10.63	3.309	31.13
20140904-PurClathDigest-1ug-01	567	10670	347.9	1277	0	63.86	2.41	3.774	10.63	3.306	31.12
20140904-PurClathDigest-1ug-01	568	10650	347.5	1276	0	63.8	2.411	3.78	10.62	3.304	31.11
20140904-PurClathDigest-1ug-01	569	10640	347	1275	0	63.73	2.413	3.786	10.62	3.302	31.1
20140904-PurClathDigest-1ug-01	570	10630	346.5	1273	0	63.66	2.414	3.792	10.61	3.3	31.09
20140904-PurClathDigest-1ug-01	571	10640	346.6	1274	0	63.71	2.414	3.789	10.62	3.304	31.1
20140904-PurClathDigest-1ug-01	572	10640	346.6	1275	0	63.75	2.413	3.785	10.63	3.307	31.1
20140904-PurClathDigest-1ug-01	573	10650	346.7	1276	0	63.79	2.412	3.781	10.64	3.311	31.11
20140904-PurClathDigest-1ug-01	574	10650	346.8	1277	0	63.83	2.411	3.778	10.65	3.314	31.12
20140904-PurClathDigest-1ug-01	575	10660	346.9	1278	0	63.88	2.411	3.774	10.66	3.318	31.12
20140904-PurClathDigest-1ug-01	576	10660	346.9	1278	0	63.92	2.41	3.77	10.67	3.321	31.13
20140904-PurClathDigest-1ug-01	577	10670	347	1279	0	63.96	2.409	3.767	10.68	3.325	31.14
20140904-PurClathDigest-1ug-01	578	10680	347.1	1280	0	64	2.409	3.763	10.69	3.329	31.14
20140904-PurClathDigest-1ug-01	579	10680	347.2	1281	0	64.05	2.408	3.76	10.7	3.332	31.15
20140904-PurClathDigest-1ug-01	580	10690	347.2	1282	0	64.09	2.407	3.756	10.71	3.336	31.15
20140904-PurClathDigest-1ug-01	581	10690	347.3	1283	0	64.13	2.406	3.752	10.72	3.339	31.16
20140904-PurClathDigest-1ug-01	582	10700	347.4	1283	0	64.17	2.406	3.749	10.73	3.343	31.17
20140904-PurClathDigest-1ug-01	583	10700	347.5	1284	0	64.22	2.405	3.745	10.74	3.346	31.17
20140904-PurClathDigest-1ug-01	584	10710	347.5	1285	0	64.26	2.404	3.742	10.74	3.35	31.18
20140904-PurClathDigest-1ug-01	585	10710	347.6	1286	0	64.3	2.404	3.738	10.75	3.354	31.19
20140904-PurClathDigest-1ug-01	586	10720	347.7	1287	0	64.34	2.403	3.734	10.76	3.357	31.19
20140904-PurClathDigest-1ug-01	587	10720	347.8	1288	0	64.39	2.402	3.731	10.77	3.361	31.2
20140904-PurClathDigest-1ug-01	588	10730	347.8	1289	0	64.43	2.401	3.727	10.78	3.364	31.2
20140904-PurClathDigest-1ug-01	589	10730	347.9	1289	0	64.47	2.401	3.724	10.79	3.368	31.21
20140904-PurClathDigest-1ug-01	590	10740	348	1290	0	64.51	2.4	3.72	10.8	3.371	31.22
20140904-PurClathDigest-1ug-01	591	10730	347.9	1289	0	64.43	2.398	3.722	10.79	3.367	31.22
20140904-PurClathDigest-1ug-01	592	10730	347.9	1287	0	64.35	2.396	3.724	10.77	3.364	31.22
20140904-PurClathDigest-1ug-01	593	10730	347.8	1285	0	64.27	2.395	3.726	10.76	3.36	31.22
20140904-PurClathDigest-1ug-01	594	10720	347.8	1284	0	64.19	2.393	3.728	10.75	3.356	31.22
20140904-PurClathDigest-1ug-01	595	10720	347.7	1282	0	64.11	2.391	3.73	10.73	3.352	31.23
20140904-PurClathDigest-1ug-01	596	10710	347.7	1281	0	64.03	2.389	3.732	10.72	3.348	31.23
20140904-PurClathDigest-1ug-01	597	10710	347.6	1279	0	63.94	2.387	3.734	10.71	3.344	31.23
20140904-PurClathDigest-1ug-01	598	10710	347.6	1277	0	63.86	2.386	3.736	10.69	3.34	31.23
20140904-PurClathDigest-1ug-01	599	10700	347.5	1276	0	63.78	2.384	3.738	10.68	3.336	31.23
20140904-PurClathDigest-1ug-01	600	10700	347.5	1274	0	63.7	2.382	3.74	10.67	3.332	31.24
20140904-PurClathDigest-1ug-01	601	10690	347.4	1272	0	63.62	2.38	3.742	10.65	3.328	31.24
20140904-PurClathDigest-1ug-01	602	10690	347.4	1271	0	63.54	2.379	3.744	10.64	3.324	31.24
20140904-PurClathDigest-1ug-01	603	10680	347.3	1269	0	63.46	2.377	3.746	10.63	3.32	31.24
20140904-PurClathDigest-1ug-01	604	10680	347.3	1267	0	63.37	2.375	3.748	10.62	3.316	31.24
20140904-PurClathDigest-1ug-01	605	10680	347.2	1266	0	63.29	2.373	3.75	10.6	3.312	31.24
20140904-PurClathDigest-1ug-01	606	10670	347.2	1264	0	63.21	2.371	3.752	10.59	3.309	31.25
20140904-PurClathDigest-1ug-01	607	10670	347.1	1263	0	63.13	2.37	3.754	10.58	3.305	31.25
20140904-PurClathDigest-1ug-01	608	10660	347.1	1261	0	63.05	2.368	3.756	10.56	3.301	31.25
20140904-PurClathDigest-1ug-01	609	10660	347	1259	0	62.97	2.366	3.758	10.55	3.297	31.25
20140904-PurClathDigest-1ug-01	610	10660	347	1258	0	62.89	2.364	3.76	10.54	3.293	31.25
20140904-PurClathDigest-1ug-01	611	10650	347	1256	0	62.8	2.359	3.757	10.52	3.286	31.22
20140904-PurClathDigest-1ug-01	612	10650	347	1254	0	62.71	2.354	3.754	10.51	3.279	31.19
20140904-PurClathDigest-1ug-01	613	10650	347	1253	0	62.63	2.349	3.751	10.5	3.271	31.16
20140904-PurClathDigest-1ug-01	614	10650	347.1	1251	0	62.54	2.344	3.748	10.49	3.264	31.13
20140904-PurClathDigest-1ug-01	615	10640	347.1	1249	0	62.45	2.339	3.746	10.47	3.257	31.1
20140904-PurClathDigest-1ug-01	616	10640	347.1	1247	0	62.37	2.334	3.743	10.46	3.25	31.07
20140904-PurClathDigest-1ug-01	617	10640	347.2	1246	0	62.28	2.329	3.74	10.45	3.243	31.04
20140904-PurClathDigest-1ug-01	618	10640	347.2	1244	0	62.19	2.324	3.737	10.44	3.236	31.01
20140904-PurClathDigest-1ug-01	619	10630	347.2	1242	0	62.11	2.319	3.734	10.42	3.229	30.97
20140904-PurClathDigest-1ug-01	620	10630	347.3	1240	0	62.02	2.314	3.731	10.41	3.221	30.94
20140904-PurClathDigest-1ug-01	621	10630	347.3	1239	0	61.93	2.309	3.729	10.4	3.214	30.91
20140904-PurClathDigest-1ug-01	622	10630	347.3	1237	0	61.85	2.304	3.726	10.39	3.207	30.88
20140904-PurClathDigest-1ug-01	623	10620	347.4	1235	0	61.76	2.299	3.723	10.37	3.2	30.85
20140904-PurClathDigest-1ug-01	624	10620	347.4	1234	0	61.68	2.294	3.72	10.36	3.193	30.82
20140904-PurClathDigest-1ug-01	625	10620	347.4	1232	0	61.59	2.289	3.717	10.35	3.186	30.79
20140904-PurClathDigest-1ug-01	626	10610	347.5	1230	0	61.5	2.284	3.714	10.34	3.179	30.75
20140904-PurClathDigest-1ug-01	627	10610	347.5	1228	0	61.42	2.279	3.711	10.32	3.171	30.72
20140904-PurClathDigest-1ug-01	628	10610	347.5	1227	0	61.33	2.274	3.708	10.31	3.164	30.69
20140904-PurClathDigest-1ug-01	629	10610	347.5	1225	0	61.24	2.269	3.705	10.3	3.157	30.66
20140904-PurClathDigest-1ug-01	630	10600	347.6	1223	0	61.16	2.264	3.702	10.29	3.15	30.62
20140904-PurClathDigest-1ug-01	631	10580	346.9	1220	0	61	2.259	3.702	10.26	3.139	30.6
20140904-PurClathDigest-1ug-01	632	10560	346.2	1217	0	60.85	2.253	3.702	10.23	3.127	30.57
20140904-PurClathDigest-1ug-01	633	10540	345.5	1214	0	60.7	2.247	3.702	10.2	3.116	30.55
20140904-PurClathDigest-1ug-01	634	10520	344.8	1211	0	60.54	2.241	3.702	10.17	3.104	30.52
20140904-PurClathDigest-1ug-01	635	10500	344.2	1208	0	60.39	2.236	3.702	10.14	3.093	30.49
20140904-PurClathDigest-1ug-01	636	10480	343.5	1205	0	60.23	2.23	3.702	10.11	3.081	30.47
20140904-PurClathDigest-1ug-01	637	10460	342.8	1202	0	60.08	2.224	3.702	10.09	3.07	30.44
20140904-PurClathDigest-1ug-01	638	10430	342.1	1199	0	59.93	2.219	3.702	10.06	3.059	30.41
20140904-PurClathDigest-1ug-01	639	10410	341.4	1195	0	59.77	2.213	3.702	10.03	3.047	30.38
20140904-PurClathDigest-1ug-01	640	10390	340.8	1192	0	59.62	2.207	3.702	10	3.036	30.36
20140904-PurClathDigest-1ug-01	641	10370	340.1	1189	0	59.46	2.201	3.702	9.971	3.024	30.33
20140904-PurClathDigest-1ug-01	642	10350	339.4	1186	0	59.31	2.196	3.702	9.943	3.013	30.3
20140904-PurClathDigest-1ug-01	643	10330	338.7	1183	0	59.16	2.19	3.702	9.914	3.001	30.27
20140904-PurClathDigest-1ug-01	644	10310	338	1180	0	59	2.184	3.702	9.886	2.99	30.25
20140904-PurClathDigest-1ug-01	645	10290	337.3	1177	0	58.85	2.179	3.702	9.857	2.979	30.22
20140904-PurClathDigest-1ug-01	646	10260	336.7	1174	0	58.69	2.173	3.702	9.829	2.967	30.19
20140904-PurClathDigest-1ug-01	647	10240	336	1171	0	58.54	2.167	3.702	9.8	2.956	30.16
20140904-PurClathDigest-1ug-01	648	10220	335.3	1168	0	58.39	2.161	3.702	9.771	2.944	30.13
20140904-PurClathDigest-1ug-01	649	10200	334.6	1165	0	58.23	2.156	3.702	9.743	2.933	30.1
20140904-PurClathDigest-1ug-01	650	10180	333.9	1162	0	58.08	2.15	3.702	9.714	2.921	30.07
20140904-PurClathDigest-1ug-01	651	10170	333.7	1160	0	57.98	2.144	3.697	9.694	2.916	30.08
20140904-PurClathDigest-1ug-01	652	10160	333.6	1158	0	57.89	2.137	3.692	9.674	2.91	30.08
20140904-PurClathDigest-1ug-01	653	10150	333.4	1156	0	57.79	2.131	3.687	9.653	2.904	30.09
20140904-PurClathDigest-1ug-01	654	10150	333.2	1154	0	57.69	2.124	3.682	9.633	2.899	30.09
20140904-PurClathDigest-1ug-01	655	10140	333	1152	0	57.6	2.118	3.677	9.613	2.893	30.09
20140904-PurClathDigest-1ug-01	656	10130	332.9	1150	0	57.5	2.111	3.672	9.592	2.887	30.1
20140904-PurClathDigest-1ug-01	657	10120	332.7	1148	0	57.41	2.105	3.667	9.572	2.881	30.1
20140904-PurClathDigest-1ug-01	658	10110	332.5	1146	0	57.31	2.099	3.662	9.551	2.876	30.11
20140904-PurClathDigest-1ug-01	659	10100	332.3	1144	0	57.21	2.092	3.657	9.531	2.87	30.11
20140904-PurClathDigest-1ug-01	660	10090	332.2	1142	0	57.12	2.086	3.652	9.511	2.864	30.12
20140904-PurClathDigest-1ug-01	661	10080	332	1140	0	57.02	2.079	3.646	9.49	2.859	30.12
20140904-PurClathDigest-1ug-01	662	10080	331.8	1139	0	56.93	2.073	3.641	9.47	2.853	30.13
20140904-PurClathDigest-1ug-01	663	10070	331.6	1137	0	56.83	2.066	3.636	9.45	2.847	30.13
20140904-PurClathDigest-1ug-01	664	10060	331.5	1135	0	56.73	2.06	3.631	9.429	2.841	30.13
20140904-PurClathDigest-1ug-01	665	10050	331.3	1133	0	56.64	2.054	3.626	9.409	2.836	30.14
20140904-PurClathDigest-1ug-01	666	10040	331.1	1131	0	56.54	2.047	3.621	9.389	2.83	30.14
20140904-PurClathDigest-1ug-01	667	10030	330.9	1129	0	56.45	2.041	3.615	9.368	2.824	30.15
20140904-PurClathDigest-1ug-01	668	10020	330.8	1127	0	56.35	2.034	3.61	9.348	2.819	30.15
20140904-PurClathDigest-1ug-01	669	10020	330.6	1125	0	56.25	2.028	3.605	9.327	2.813	30.16
20140904-PurClathDigest-1ug-01	670	10010	330.4	1123	0	56.16	2.021	3.6	9.307	2.807	30.16
20140904-PurClathDigest-1ug-01	671	10010	330.6	1122	0	56.11	2.021	3.603	9.304	2.806	30.16
20140904-PurClathDigest-1ug-01	672	10010	330.8	1121	0	56.06	2.021	3.606	9.301	2.804	30.15
20140904-PurClathDigest-1ug-01	673	10010	331.1	1120	0	56	2.021	3.609	9.297	2.803	30.15
20140904-PurClathDigest-1ug-01	674	10020	331.3	1119	0	55.95	2.021	3.613	9.294	2.801	30.14
20140904-PurClathDigest-1ug-01	675	10020	331.5	1118	0	55.9	2.021	3.616	9.291	2.8	30.14
20140904-PurClathDigest-1ug-01	676	10020	331.7	1117	0	55.85	2.021	3.619	9.288	2.799	30.13
20140904-PurClathDigest-1ug-01	677	10020	331.9	1116	0	55.8	2.021	3.622	9.285	2.797	30.13
20140904-PurClathDigest-1ug-01	678	10020	332.1	1115	0	55.75	2.021	3.626	9.281	2.796	30.12
20140904-PurClathDigest-1ug-01	679	10030	332.3	1114	0	55.7	2.021	3.629	9.278	2.794	30.12
20140904-PurClathDigest-1ug-01	680	10030	332.6	1113	0	55.65	2.021	3.632	9.275	2.793	30.11
20140904-PurClathDigest-1ug-01	681	10030	332.8	1112	0	55.6	2.021	3.636	9.272	2.791	30.11
20140904-PurClathDigest-1ug-01	682	10030	333	1111	0	55.55	2.021	3.639	9.269	2.79	30.1
20140904-PurClathDigest-1ug-01	683	10030	333.2	1110	0	55.5	2.021	3.642	9.265	2.789	30.1
20140904-PurClathDigest-1ug-01	684	10040	333.4	1109	0	55.45	2.021	3.646	9.262	2.787	30.09
20140904-PurClathDigest-1ug-01	685	10040	333.6	1108	0	55.4	2.021	3.649	9.259	2.786	30.09
20140904-PurClathDigest-1ug-01	686	10040	333.8	1107	0	55.35	2.021	3.652	9.256	2.784	30.08
20140904-PurClathDigest-1ug-01	687	10040	334.1	1106	0	55.29	2.021	3.656	9.252	2.783	30.08
20140904-PurClathDigest-1ug-01	688	10040	334.3	1105	0	55.24	2.021	3.659	9.249	2.781	30.07
20140904-PurClathDigest-1ug-01	689	10050	334.5	1104	0	55.19	2.021	3.662	9.246	2.78	30.07
20140904-PurClathDigest-1ug-01	690	10050	334.7	1103	0	55.14	2.021	3.666	9.243	2.779	30.06
20140904-PurClathDigest-1ug-01	691	10050	334.9	1102	0	55.09	2.022	3.67	9.239	2.784	30.13
20140904-PurClathDigest-1ug-01	692	10050	335.1	1101	0	55.03	2.022	3.674	9.234	2.789	30.21
20140904-PurClathDigest-1ug-01	693	10060	335.2	1100	0	54.98	2.023	3.679	9.23	2.795	30.28
20140904-PurClathDigest-1ug-01	694	10060	335.4	1098	0	54.92	2.023	3.683	9.226	2.8	30.35
20140904-PurClathDigest-1ug-01	695	10060	335.6	1097	0	54.87	2.023	3.687	9.221	2.805	30.42
20140904-PurClathDigest-1ug-01	696	10060	335.8	1096	0	54.81	2.024	3.692	9.217	2.811	30.49
20140904-PurClathDigest-1ug-01	697	10070	336	1095	0	54.76	2.024	3.696	9.213	2.816	30.57
20140904-PurClathDigest-1ug-01	698	10070	336.1	1094	0	54.7	2.024	3.701	9.209	2.821	30.64
20140904-PurClathDigest-1ug-01	699	10070	336.3	1093	0	54.65	2.025	3.705	9.204	2.827	30.71
20140904-PurClathDigest-1ug-01	700	10070	336.5	1092	0	54.59	2.025	3.709	9.2	2.832	30.78
20140904-PurClathDigest-1ug-01	701	10080	336.7	1091	0	54.54	2.025	3.714	9.196	2.837	30.86
20140904-PurClathDigest-1ug-01	702	10080	336.9	1090	0	54.48	2.026	3.718	9.191	2.843	30.93
20140904-PurClathDigest-1ug-01	703	10080	337	1089	0	54.43	2.026	3.722	9.187	2.848	31
20140904-PurClathDigest-1ug-01	704	10080	337.2	1087	0	54.37	2.026	3.727	9.183	2.854	31.07
20140904-PurClathDigest-1ug-01	705	10090	337.4	1086	0	54.32	2.027	3.731	9.179	2.859	31.15
20140904-PurClathDigest-1ug-01	706	10090	337.6	1085	0	54.26	2.027	3.736	9.174	2.864	31.22
20140904-PurClathDigest-1ug-01	707	10090	337.7	1084	0	54.21	2.028	3.74	9.17	2.87	31.29
20140904-PurClathDigest-1ug-01	708	10090	337.9	1083	0	54.15	2.028	3.745	9.166	2.875	31.37
20140904-PurClathDigest-1ug-01	709	10100	338.1	1082	0	54.1	2.028	3.749	9.161	2.88	31.44
20140904-PurClathDigest-1ug-01	710	10100	338.3	1081	0	54.04	2.029	3.754	9.157	2.886	31.51
20140904-PurClathDigest-1ug-01	711	10100	338.5	1079	0	53.93	2.026	3.757	9.159	2.887	31.52
20140904-PurClathDigest-1ug-01	712	10100	338.7	1076	0	53.82	2.024	3.761	9.161	2.888	31.52
20140904-PurClathDigest-1ug-01	713	10100	338.9	1074	0	53.71	2.022	3.765	9.162	2.889	31.53
20140904-PurClathDigest-1ug-01	714	10100	339.2	1072	0	53.6	2.02	3.768	9.164	2.89	31.54
20140904-PurClathDigest-1ug-01	715	10100	339.4	1070	0	53.49	2.018	3.772	9.166	2.891	31.54
20140904-PurClathDigest-1ug-01	716	10100	339.6	1068	0	53.38	2.016	3.776	9.168	2.892	31.55
20140904-PurClathDigest-1ug-01	717	10100	339.8	1066	0	53.28	2.014	3.78	9.17	2.893	31.55
20140904-PurClathDigest-1ug-01	718	10100	340	1063	0	53.17	2.011	3.783	9.171	2.894	31.56
20140904-PurClathDigest-1ug-01	719	10100	340.3	1061	0	53.06	2.009	3.787	9.173	2.895	31.56
20140904-PurClathDigest-1ug-01	720	10100	340.5	1059	0	52.95	2.007	3.791	9.175	2.896	31.57
20140904-PurClathDigest-1ug-01	721	10100	340.7	1057	0	52.84	2.005	3.795	9.177	2.897	31.57
20140904-PurClathDigest-1ug-01	722	10100	340.9	1055	0	52.73	2.003	3.799	9.179	2.899	31.58
20140904-PurClathDigest-1ug-01	723	10100	341.1	1052	0	52.62	2.001	3.802	9.18	2.9	31.59
20140904-PurClathDigest-1ug-01	724	10100	341.4	1050	0	52.51	1.999	3.806	9.182	2.901	31.59
20140904-PurClathDigest-1ug-01	725	10110	341.6	1048	0	52.4	1.996	3.81	9.184	2.902	31.6
20140904-PurClathDigest-1ug-01	726	10110	341.8	1046	0	52.29	1.994	3.814	9.186	2.903	31.6
20140904-PurClathDigest-1ug-01	727	10110	342	1044	0	52.18	1.992	3.818	9.187	2.904	31.61
20140904-PurClathDigest-1ug-01	728	10110	342.2	1041	0	52.07	1.99	3.822	9.189	2.905	31.61
20140904-PurClathDigest-1ug-01	729	10110	342.4	1039	0	51.96	1.988	3.826	9.191	2.906	31.62
20140904-PurClathDigest-1ug-01	730	10110	342.7	1037	0	51.85	1.986	3.83	9.193	2.907	31.62
20140904-PurClathDigest-1ug-01	731	10110	343	1036	0	51.8	1.978	3.818	9.179	2.899	31.58
20140904-PurClathDigest-1ug-01	732	10120	343.4	1035	0	51.75	1.97	3.807	9.166	2.891	31.54
20140904-PurClathDigest-1ug-01	733	10130	343.8	1034	0	51.7	1.962	3.795	9.152	2.882	31.5
20140904-PurClathDigest-1ug-01	734	10130	344.2	1033	0	51.65	1.954	3.784	9.139	2.874	31.45
20140904-PurClathDigest-1ug-01	735	10140	344.6	1032	0	51.59	1.946	3.773	9.125	2.866	31.41
20140904-PurClathDigest-1ug-01	736	10140	345	1031	0	51.54	1.939	3.761	9.111	2.858	31.37
20140904-PurClathDigest-1ug-01	737	10150	345.4	1030	0	51.49	1.931	3.75	9.098	2.85	31.32
20140904-PurClathDigest-1ug-01	738	10160	345.7	1029	0	51.44	1.923	3.738	9.084	2.841	31.28
20140904-PurClathDigest-1ug-01	739	10160	346.1	1028	0	51.39	1.915	3.726	9.071	2.833	31.23
20140904-PurClathDigest-1ug-01	740	10170	346.5	1027	0	51.34	1.907	3.715	9.057	2.825	31.19
20140904-PurClathDigest-1ug-01	741	10170	346.9	1026	0	51.29	1.899	3.703	9.044	2.817	31.15
20140904-PurClathDigest-1ug-01	742	10180	347.3	1025	0	51.24	1.891	3.692	9.03	2.809	31.1
20140904-PurClathDigest-1ug-01	743	10190	347.7	1024	0	51.19	1.884	3.68	9.016	2.8	31.06
20140904-PurClathDigest-1ug-01	744	10190	348	1023	0	51.13	1.876	3.668	9.003	2.792	31.01
20140904-PurClathDigest-1ug-01	745	10200	348.4	1022	0	51.08	1.868	3.656	8.989	2.784	30.97
20140904-PurClathDigest-1ug-01	746	10200	348.8	1021	0	51.03	1.86	3.645	8.976	2.776	30.92
20140904-PurClathDigest-1ug-01	747	10210	349.2	1020	0	50.98	1.852	3.633	8.962	2.767	30.88
20140904-PurClathDigest-1ug-01	748	10220	349.6	1019	0	50.93	1.844	3.621	8.949	2.759	30.83
20140904-PurClathDigest-1ug-01	749	10220	350	1018	0	50.88	1.836	3.609	8.935	2.751	30.79
20140904-PurClathDigest-1ug-01	750	10230	350.3	1017	0	50.83	1.829	3.598	8.921	2.743	30.74
20140904-PurClathDigest-1ug-01	751	10230	350.7	1015	0	50.75	1.825	3.596	8.915	2.738	30.71
20140904-PurClathDigest-1ug-01	752	10240	351.1	1013	0	50.67	1.821	3.594	8.909	2.733	30.68
20140904-PurClathDigest-1ug-01	753	10240	351.5	1012	0	50.59	1.817	3.592	8.902	2.728	30.64
20140904-PurClathDigest-1ug-01	754	10240	351.9	1010	0	50.5	1.813	3.59	8.896	2.723	30.61
20140904-PurClathDigest-1ug-01	755	10250	352.3	1008	0	50.42	1.809	3.587	8.889	2.718	30.57
20140904-PurClathDigest-1ug-01	756	10250	352.7	1007	0	50.34	1.805	3.585	8.883	2.713	30.54
20140904-PurClathDigest-1ug-01	757	10250	353.1	1005	0	50.26	1.801	3.583	8.876	2.708	30.51
20140904-PurClathDigest-1ug-01	758	10260	353.5	1004	0	50.18	1.797	3.581	8.87	2.703	30.47
20140904-PurClathDigest-1ug-01	759	10260	353.9	1002	0	50.1	1.793	3.579	8.864	2.698	30.44
20140904-PurClathDigest-1ug-01	760	10270	354.3	1000	0	50.02	1.789	3.577	8.857	2.693	30.4
20140904-PurClathDigest-1ug-01	761	10270	354.7	998.7	0	49.94	1.785	3.575	8.851	2.688	30.37
20140904-PurClathDigest-1ug-01	762	10270	355.1	997.1	0	49.86	1.781	3.573	8.844	2.683	30.33
20140904-PurClathDigest-1ug-01	763	10280	355.5	995.5	0	49.77	1.778	3.571	8.838	2.678	30.3
20140904-PurClathDigest-1ug-01	764	10280	355.8	993.9	0	49.69	1.774	3.569	8.831	2.673	30.27
20140904-PurClathDigest-1ug-01	765	10290	356.2	992.2	0	49.61	1.77	3.567	8.825	2.668	30.23
20140904-PurClathDigest-1ug-01	766	10290	356.6	990.6	0	49.53	1.766	3.565	8.819	2.663	30.2
20140904-PurClathDigest-1ug-01	767	10290	357	989	0	49.45	1.762	3.563	8.812	2.658	30.16
20140904-PurClathDigest-1ug-01	768	10300	357.4	987.4	0	49.37	1.758	3.561	8.806	2.653	30.13
20140904-PurClathDigest-1ug-01	769	10300	357.8	985.8	0	49.29	1.754	3.559	8.799	2.648	30.09
20140904-PurClathDigest-1ug-01	770	10300	358.2	984.1	0	49.21	1.75	3.556	8.793	2.643	30.06
20140904-PurClathDigest-1ug-01	771	10300	358.4	982.5	0	49.12	1.741	3.543	8.779	2.634	30
20140904-PurClathDigest-1ug-01	772	10310	358.6	980.8	0	49.04	1.731	3.531	8.764	2.625	29.95
20140904-PurClathDigest-1ug-01	773	10310	358.8	979.2	0	48.96	1.722	3.518	8.75	2.616	29.9
20140904-PurClathDigest-1ug-01	774	10310	359	977.5	0	48.88	1.713	3.505	8.736	2.607	29.84
20140904-PurClathDigest-1ug-01	775	10310	359.2	975.9	0	48.79	1.704	3.491	8.721	2.598	29.79
20140904-PurClathDigest-1ug-01	776	10310	359.4	974.2	0	48.71	1.694	3.478	8.707	2.589	29.74
20140904-PurClathDigest-1ug-01	777	10310	359.6	972.5	0	48.63	1.685	3.465	8.693	2.58	29.68
20140904-PurClathDigest-1ug-01	778	10310	359.8	970.9	0	48.54	1.676	3.452	8.679	2.571	29.63
20140904-PurClathDigest-1ug-01	779	10310	360	969.2	0	48.46	1.666	3.439	8.664	2.562	29.58
20140904-PurClathDigest-1ug-01	780	10310	360.2	967.6	0	48.38	1.657	3.425	8.65	2.554	29.52
20140904-PurClathDigest-1ug-01	781	10310	360.4	965.9	0	48.3	1.648	3.412	8.636	2.545	29.47
20140904-PurClathDigest-1ug-01	782	10310	360.6	964.3	0	48.21	1.639	3.399	8.621	2.536	29.41
20140904-PurClathDigest-1ug-01	783	10310	360.8	962.6	0	48.13	1.629	3.385	8.607	2.527	29.36
20140904-PurClathDigest-1ug-01	784	10310	361	960.9	0	48.05	1.62	3.372	8.593	2.518	29.3
20140904-PurClathDigest-1ug-01	785	10310	361.2	959.3	0	47.96	1.611	3.358	8.579	2.509	29.25
20140904-PurClathDigest-1ug-01	786	10310	361.4	957.6	0	47.88	1.601	3.345	8.564	2.5	29.19
20140904-PurClathDigest-1ug-01	787	10310	361.6	956	0	47.8	1.592	3.331	8.55	2.491	29.14
20140904-PurClathDigest-1ug-01	788	10310	361.8	954.3	0	47.72	1.583	3.317	8.536	2.482	29.08
20140904-PurClathDigest-1ug-01	789	10310	362	952.7	0	47.63	1.574	3.304	8.521	2.473	29.02
20140904-PurClathDigest-1ug-01	790	10320	362.2	951	0	47.55	1.564	3.29	8.507	2.464	28.97
20140904-PurClathDigest-1ug-01	791	10310	362.1	948	0	47.4	1.564	3.3	8.495	2.461	28.98
20140904-PurClathDigest-1ug-01	792	10300	362	944.9	0	47.25	1.564	3.311	8.482	2.459	28.99
20140904-PurClathDigest-1ug-01	793	10290	361.9	941.9	0	47.09	1.564	3.322	8.47	2.456	28.99
20140904-PurClathDigest-1ug-01	794	10280	361.8	938.9	0	46.94	1.564	3.332	8.457	2.453	29
20140904-PurClathDigest-1ug-01	795	10270	361.6	935.8	0	46.79	1.564	3.343	8.445	2.45	29.01
20140904-PurClathDigest-1ug-01	796	10260	361.5	932.8	0	46.64	1.564	3.354	8.432	2.447	29.02
20140904-PurClathDigest-1ug-01	797	10250	361.4	929.8	0	46.49	1.564	3.365	8.42	2.444	29.03
20140904-PurClathDigest-1ug-01	798	10240	361.3	926.7	0	46.34	1.564	3.376	8.407	2.441	29.04
20140904-PurClathDigest-1ug-01	799	10240	361.2	923.7	0	46.18	1.564	3.387	8.395	2.439	29.05
20140904-PurClathDigest-1ug-01	800	10230	361.1	920.6	0	46.03	1.564	3.398	8.382	2.436	29.06
20140904-PurClathDigest-1ug-01	801	10220	361	917.6	0	45.88	1.564	3.409	8.37	2.433	29.07
20140904-PurClathDigest-1ug-01	802	10210	360.9	914.6	0	45.73	1.564	3.421	8.357	2.43	29.08
20140904-PurClathDigest-1ug-01	803	10200	360.8	911.5	0	45.58	1.564	3.432	8.345	2.427	29.09
20140904-PurClathDigest-1ug-01	804	10190	360.7	908.5	0	45.42	1.564	3.444	8.332	2.424	29.1
20140904-PurClathDigest-1ug-01	805	10180	360.6	905.5	0	45.27	1.564	3.455	8.32	2.421	29.1
20140904-PurClathDigest-1ug-01	806	10170	360.5	902.4	0	45.12	1.564	3.467	8.307	2.419	29.11
20140904-PurClathDigest-1ug-01	807	10160	360.4	899.4	0	44.97	1.564	3.479	8.295	2.416	29.12
20140904-PurClathDigest-1ug-01	808	10160	360.3	896.4	0	44.82	1.564	3.49	8.282	2.413	29.13
20140904-PurClathDigest-1ug-01	809	10150	360.2	893.3	0	44.67	1.564	3.502	8.27	2.41	29.14
20140904-PurClathDigest-1ug-01	810	10140	360.1	890.3	0	44.51	1.564	3.514	8.257	2.407	29.15
20140904-PurClathDigest-1ug-01	811	10130	360.2	888.1	0	44.4	1.556	3.504	8.234	2.392	29.05
20140904-PurClathDigest-1ug-01	812	10130	360.3	885.8	0	44.29	1.547	3.493	8.211	2.377	28.95
20140904-PurClathDigest-1ug-01	813	10130	360.4	883.6	0	44.18	1.539	3.482	8.187	2.362	28.85
20140904-PurClathDigest-1ug-01	814	10120	360.5	881.4	0	44.07	1.53	3.472	8.164	2.347	28.75
20140904-PurClathDigest-1ug-01	815	10120	360.6	879.2	0	43.96	1.521	3.461	8.141	2.332	28.65
20140904-PurClathDigest-1ug-01	816	10120	360.7	877	0	43.85	1.513	3.45	8.118	2.317	28.54
20140904-PurClathDigest-1ug-01	817	10110	360.8	874.7	0	43.74	1.504	3.439	8.095	2.302	28.44
20140904-PurClathDigest-1ug-01	818	10110	360.9	872.5	0	43.63	1.496	3.429	8.071	2.287	28.34
20140904-PurClathDigest-1ug-01	819	10110	361	870.3	0	43.51	1.487	3.418	8.048	2.272	28.23
20140904-PurClathDigest-1ug-01	820	10100	361.1	868.1	0	43.4	1.479	3.407	8.025	2.257	28.13
20140904-PurClathDigest-1ug-01	821	10100	361.2	865.8	0	43.29	1.47	3.396	8.002	2.242	28.02
20140904-PurClathDigest-1ug-01	822	10100	361.3	863.6	0	43.18	1.461	3.384	7.979	2.227	27.91
20140904-PurClathDigest-1ug-01	823	10090	361.4	861.4	0	43.07	1.453	3.373	7.955	2.212	27.81
20140904-PurClathDigest-1ug-01	824	10090	361.5	859.2	0	42.96	1.444	3.362	7.932	2.197	27.7
20140904-PurClathDigest-1ug-01	825	10090	361.6	857	0	42.85	1.436	3.351	7.909	2.182	27.59
20140904-PurClathDigest-1ug-01	826	10080	361.7	854.7	0	42.74	1.427	3.339	7.886	2.167	27.48
20140904-PurClathDigest-1ug-01	827	10080	361.8	852.5	0	42.63	1.419	3.328	7.862	2.152	27.37
20140904-PurClathDigest-1ug-01	828	10080	361.9	850.3	0	42.51	1.41	3.316	7.839	2.137	27.26
20140904-PurClathDigest-1ug-01	829	10070	362	848.1	0	42.4	1.401	3.305	7.816	2.122	27.15
20140904-PurClathDigest-1ug-01	830	10070	362.1	845.9	0	42.29	1.393	3.293	7.793	2.107	27.04
20140904-PurClathDigest-1ug-01	831	10070	362.2	843.8	0	42.19	1.382	3.275	7.785	2.091	26.86
20140904-PurClathDigest-1ug-01	832	10060	362.3	841.7	0	42.08	1.371	3.257	7.777	2.076	26.69
20140904-PurClathDigest-1ug-01	833	10060	362.4	839.6	0	41.98	1.36	3.239	7.769	2.06	26.51
20140904-PurClathDigest-1ug-01	834	10060	362.5	837.5	0	41.87	1.349	3.221	7.761	2.044	26.34
20140904-PurClathDigest-1ug-01	835	10050	362.6	835.4	0	41.77	1.338	3.202	7.754	2.029	26.16
20140904-PurClathDigest-1ug-01	836	10050	362.7	833.3	0	41.66	1.326	3.184	7.746	2.013	25.99
20140904-PurClathDigest-1ug-01	837	10040	362.9	831.2	0	41.56	1.315	3.165	7.738	1.997	25.81
20140904-PurClathDigest-1ug-01	838	10040	363	829.1	0	41.45	1.304	3.146	7.73	1.981	25.63
20140904-PurClathDigest-1ug-01	839	10040	363.1	827	0	41.35	1.293	3.128	7.722	1.966	25.46
20140904-PurClathDigest-1ug-01	840	10030	363.2	824.9	0	41.24	1.282	3.109	7.714	1.95	25.28
20140904-PurClathDigest-1ug-01	841	10030	363.3	822.8	0	41.14	1.271	3.09	7.706	1.934	25.1
20140904-PurClathDigest-1ug-01	842	10030	363.4	820.7	0	41.03	1.26	3.071	7.699	1.919	24.92
20140904-PurClathDigest-1ug-01	843	10020	363.6	818.6	0	40.93	1.249	3.052	7.691	1.903	24.74
20140904-PurClathDigest-1ug-01	844	10020	363.7	816.5	0	40.82	1.238	3.032	7.683	1.887	24.56
20140904-PurClathDigest-1ug-01	845	10010	363.8	814.4	0	40.72	1.227	3.013	7.675	1.871	24.38
20140904-PurClathDigest-1ug-01	846	10010	363.9	812.3	0	40.61	1.216	2.993	7.667	1.856	24.2
20140904-PurClathDigest-1ug-01	847	10010	364	810.2	0	40.51	1.205	2.974	7.659	1.84	24.02
20140904-PurClathDigest-1ug-01	848	10000	364.1	808.1	0	40.4	1.194	2.954	7.651	1.824	23.84
20140904-PurClathDigest-1ug-01	849	10000	364.2	806	0	40.3	1.183	2.934	7.644	1.809	23.66
20140904-PurClathDigest-1ug-01	850	9996	364.4	803.9	0	40.19	1.171	2.915	7.636	1.793	23.48
20140904-PurClathDigest-1ug-01	851	9979	364	800.1	0	40.01	1.158	2.894	7.6	1.769	23.28
20140904-PurClathDigest-1ug-01	852	9962	363.7	796.4	0	39.82	1.144	2.874	7.564	1.745	23.07
20140904-PurClathDigest-1ug-01	853	9945	363.3	792.6	0	39.63	1.131	2.853	7.529	1.721	22.86
20140904-PurClathDigest-1ug-01	854	9927	363	788.9	0	39.44	1.117	2.832	7.493	1.697	22.65
20140904-PurClathDigest-1ug-01	855	9910	362.6	785.1	0	39.26	1.104	2.811	7.457	1.673	22.44
20140904-PurClathDigest-1ug-01	856	9893	362.3	781.4	0	39.07	1.09	2.79	7.421	1.649	22.22
20140904-PurClathDigest-1ug-01	857	9876	361.9	777.6	0	38.88	1.076	2.769	7.386	1.625	22.01
20140904-PurClathDigest-1ug-01	858	9858	361.6	773.9	0	38.69	1.063	2.747	7.35	1.601	21.79
20140904-PurClathDigest-1ug-01	859	9841	361.2	770.1	0	38.51	1.049	2.725	7.314	1.577	21.57
20140904-PurClathDigest-1ug-01	860	9824	360.9	766.4	0	38.32	1.036	2.703	7.279	1.554	21.34
20140904-PurClathDigest-1ug-01	861	9807	360.5	762.6	0	38.13	1.022	2.681	7.243	1.53	21.12
20140904-PurClathDigest-1ug-01	862	9789	360.2	758.9	0	37.94	1.009	2.658	7.207	1.506	20.89
20140904-PurClathDigest-1ug-01	863	9772	359.8	755.1	0	37.76	0.995	2.635	7.171	1.482	20.66
20140904-PurClathDigest-1ug-01	864	9755	359.5	751.4	0	37.57	0.9814	2.612	7.136	1.458	20.43
20140904-PurClathDigest-1ug-01	865	9738	359.1	747.6	0	37.38	0.9679	2.589	7.1	1.434	20.2
20140904-PurClathDigest-1ug-01	866	9720	358.8	743.9	0	37.19	0.9543	2.566	7.064	1.41	19.96
20140904-PurClathDigest-1ug-01	867	9703	358.4	740.1	0	37.01	0.9407	2.542	7.029	1.386	19.72
20140904-PurClathDigest-1ug-01	868	9686	358.1	736.4	0	36.82	0.9271	2.518	6.993	1.362	19.48
20140904-PurClathDigest-1ug-01	869	9669	357.7	732.6	0	36.63	0.9136	2.494	6.957	1.338	19.24
20140904-PurClathDigest-1ug-01	870	9651	357.4	728.9	0	36.44	0.9	2.47	6.921	1.314	18.99
20140904-PurClathDigest-1ug-01	871	9636	357.1	725.3	0	36.26	0.8936	2.464	6.899	1.301	18.86
20140904-PurClathDigest-1ug-01	872	9621	356.9	721.7	0	36.08	0.8871	2.459	6.876	1.288	18.73
20140904-PurClathDigest-1ug-01	873	9605	356.7	718.1	0	35.9	0.8807	2.453	6.854	1.275	18.6
20140904-PurClathDigest-1ug-01	874	9590	356.4	714.5	0	35.72	0.8743	2.447	6.831	1.261	18.47
20140904-PurClathDigest-1ug-01	875	9575	356.2	710.9	0	35.54	0.8679	2.442	6.809	1.248	18.33
20140904-PurClathDigest-1ug-01	876	9560	356	707.3	0	35.37	0.8614	2.436	6.786	1.235	18.2
20140904-PurClathDigest-1ug-01	877	9544	355.7	703.7	0	35.19	0.855	2.43	6.764	1.222	18.06
20140904-PurClathDigest-1ug-01	878	9529	355.5	700.1	0	35.01	0.8486	2.424	6.741	1.209	17.93
20140904-PurClathDigest-1ug-01	879	9514	355.2	696.5	0	34.83	0.8421	2.418	6.719	1.195	17.79
20140904-PurClathDigest-1ug-01	880	9498	355	692.9	0	34.65	0.8357	2.412	6.696	1.182	17.65
20140904-PurClathDigest-1ug-01	881	9483	354.8	689.3	0	34.47	0.8293	2.406	6.674	1.169	17.51
20140904-PurClathDigest-1ug-01	882	9468	354.5	685.7	0	34.29	0.8229	2.4	6.651	1.156	17.38
20140904-PurClathDigest-1ug-01	883	9452	354.3	682.2	0	34.11	0.8164	2.394	6.629	1.143	17.24
20140904-PurClathDigest-1ug-01	884	9437	354	678.6	0	33.93	0.81	2.387	6.606	1.129	17.09
20140904-PurClathDigest-1ug-01	885	9422	353.8	675	0	33.75	0.8036	2.381	6.584	1.116	16.95
20140904-PurClathDigest-1ug-01	886	9406	353.6	671.4	0	33.57	0.7971	2.375	6.561	1.103	16.81
20140904-PurClathDigest-1ug-01	887	9391	353.3	667.8	0	33.39	0.7907	2.368	6.539	1.09	16.66
20140904-PurClathDigest-1ug-01	888	9376	353.1	664.2	0	33.21	0.7843	2.362	6.516	1.076	16.52
20140904-PurClathDigest-1ug-01	889	9360	352.9	660.6	0	33.03	0.7779	2.355	6.494	1.063	16.37
20140904-PurClathDigest-1ug-01	890	9345	352.6	657	0	32.85	0.7714	2.348	6.471	1.05	16.23
20140904-PurClathDigest-1ug-01	891	9344	352.8	655.2	0	32.76	0.7682	2.345	6.465	1.046	16.19
20140904-PurClathDigest-1ug-01	892	9343	353	653.3	0	32.67	0.765	2.342	6.459	1.043	16.15
20140904-PurClathDigest-1ug-01	893	9341	353.2	651.5	0	32.58	0.7618	2.339	6.453	1.039	16.1
20140904-PurClathDigest-1ug-01	894	9340	353.4	649.7	0	32.48	0.7586	2.335	6.447	1.036	16.06
20140904-PurClathDigest-1ug-01	895	9339	353.5	647.9	0	32.39	0.7554	2.332	6.441	1.032	16.02
20140904-PurClathDigest-1ug-01	896	9337	353.7	646	0	32.3	0.7521	2.329	6.435	1.029	15.98
20140904-PurClathDigest-1ug-01	897	9336	353.9	644.2	0	32.21	0.7489	2.325	6.429	1.025	15.94
20140904-PurClathDigest-1ug-01	898	9335	354.1	642.4	0	32.12	0.7457	2.322	6.423	1.021	15.9
20140904-PurClathDigest-1ug-01	899	9333	354.3	640.5	0	32.03	0.7425	2.318	6.417	1.018	15.86
20140904-PurClathDigest-1ug-01	900	9332	354.5	638.7	0	31.94	0.7393	2.315	6.411	1.014	15.82
20140904-PurClathDigest-1ug-01	901	9331	354.7	636.9	0	31.84	0.7361	2.311	6.405	1.011	15.78
20140904-PurClathDigest-1ug-01	902	9329	354.8	635.1	0	31.75	0.7329	2.308	6.399	1.007	15.74
20140904-PurClathDigest-1ug-01	903	9328	355	633.2	0	31.66	0.7296	2.305	6.392	1.004	15.7
20140904-PurClathDigest-1ug-01	904	9327	355.2	631.4	0	31.57	0.7264	2.301	6.386	1	15.66
20140904-PurClathDigest-1ug-01	905	9326	355.4	629.6	0	31.48	0.7232	2.297	6.38	0.9964	15.62
20140904-PurClathDigest-1ug-01	906	9324	355.6	627.7	0	31.39	0.72	2.294	6.374	0.9929	15.58
20140904-PurClathDigest-1ug-01	907	9323	355.8	625.9	0	31.3	0.7168	2.29	6.368	0.9893	15.53
20140904-PurClathDigest-1ug-01	908	9322	355.9	624.1	0	31.2	0.7136	2.287	6.362	0.9857	15.49
20140904-PurClathDigest-1ug-01	909	9320	356.1	622.3	0	31.11	0.7104	2.283	6.356	0.9821	15.45
20140904-PurClathDigest-1ug-01	910	9319	356.3	620.4	0	31.02	0.7071	2.28	6.35	0.9786	15.41
20140904-PurClathDigest-1ug-01	911	9324	356.8	619.3	0	30.97	0.705	2.277	6.338	0.9754	15.39
20140904-PurClathDigest-1ug-01	912	9329	357.2	618.2	0	30.91	0.7029	2.274	6.326	0.9721	15.37
20140904-PurClathDigest-1ug-01	913	9334	357.7	617	0	30.85	0.7007	2.271	6.315	0.9689	15.34
20140904-PurClathDigest-1ug-01	914	9339	358.1	615.9	0	30.8	0.6986	2.268	6.303	0.9657	15.32
20140904-PurClathDigest-1ug-01	915	9344	358.6	614.8	0	30.74	0.6964	2.266	6.291	0.9625	15.3
20140904-PurClathDigest-1ug-01	916	9349	359	613.7	0	30.68	0.6943	2.263	6.279	0.9593	15.28
20140904-PurClathDigest-1ug-01	917	9354	359.5	612.5	0	30.63	0.6921	2.26	6.267	0.9561	15.25
20140904-PurClathDigest-1ug-01	918	9360	359.9	611.4	0	30.57	0.69	2.257	6.256	0.9529	15.23
20140904-PurClathDigest-1ug-01	919	9365	360.4	610.3	0	30.51	0.6879	2.254	6.244	0.9496	15.21
20140904-PurClathDigest-1ug-01	920	9370	360.8	609.1	0	30.46	0.6857	2.251	6.232	0.9464	15.19
20140904-PurClathDigest-1ug-01	921	9375	361.3	608	0	30.4	0.6836	2.249	6.22	0.9432	15.16
20140904-PurClathDigest-1ug-01	922	9380	361.7	606.9	0	30.34	0.6814	2.246	6.209	0.94	15.14
20140904-PurClathDigest-1ug-01	923	9385	362.2	605.8	0	30.29	0.6793	2.243	6.197	0.9368	15.12
20140904-PurClathDigest-1ug-01	924	9390	362.6	604.6	0	30.23	0.6771	2.24	6.185	0.9336	15.09
20140904-PurClathDigest-1ug-01	925	9395	363	603.5	0	30.18	0.675	2.237	6.173	0.9304	15.07
20140904-PurClathDigest-1ug-01	926	9400	363.5	602.4	0	30.12	0.6729	2.234	6.161	0.9271	15.05
20140904-PurClathDigest-1ug-01	927	9405	363.9	601.2	0	30.06	0.6707	2.231	6.15	0.9239	15.02
20140904-PurClathDigest-1ug-01	928	9410	364.4	600.1	0	30.01	0.6686	2.228	6.138	0.9207	15
20140904-PurClathDigest-1ug-01	929	9415	364.8	599	0	29.95	0.6664	2.225	6.126	0.9175	14.98
20140904-PurClathDigest-1ug-01	930	9420	365.3	597.9	0	29.89	0.6643	2.222	6.114	0.9143	14.95
20140904-PurClathDigest-1ug-01	931	9428	365.8	597.5	0	29.88	0.6561	2.196	6.102	0.9043	14.82
20140904-PurClathDigest-1ug-01	932	9436	366.3	597.1	0	29.86	0.6479	2.17	6.091	0.8943	14.68
20140904-PurClathDigest-1ug-01	933	9444	366.8	596.8	0	29.84	0.6396	2.144	6.079	0.8843	14.55
20140904-PurClathDigest-1ug-01	934	9452	367.3	596.4	0	29.82	0.6314	2.117	6.067	0.8743	14.41
20140904-PurClathDigest-1ug-01	935	9460	367.7	596.1	0	29.8	0.6232	2.091	6.055	0.8643	14.27
20140904-PurClathDigest-1ug-01	936	9468	368.2	595.7	0	29.79	0.615	2.065	6.044	0.8543	14.14
20140904-PurClathDigest-1ug-01	937	9476	368.7	595.4	0	29.77	0.6068	2.038	6.032	0.8443	14
20140904-PurClathDigest-1ug-01	938	9484	369.2	595	0	29.75	0.5986	2.012	6.02	0.8343	13.86
20140904-PurClathDigest-1ug-01	939	9492	369.7	594.6	0	29.73	0.5904	1.986	6.008	0.8243	13.72
20140904-PurClathDigest-1ug-01	940	9500	370.2	594.3	0	29.71	0.5821	1.959	5.996	0.8143	13.58
20140904-PurClathDigest-1ug-01	941	9509	370.7	593.9	0	29.7	0.5739	1.933	5.985	0.8043	13.44
20140904-PurClathDigest-1ug-01	942	9517	371.2	593.6	0	29.68	0.5657	1.906	5.973	0.7943	13.3
20140904-PurClathDigest-1ug-01	943	9525	371.7	593.2	0	29.66	0.5575	1.88	5.961	0.7843	13.16
20140904-PurClathDigest-1ug-01	944	9533	372.2	592.9	0	29.64	0.5493	1.853	5.949	0.7743	13.01
20140904-PurClathDigest-1ug-01	945	9541	372.6	592.5	0	29.63	0.5411	1.826	5.937	0.7643	12.87
20140904-PurClathDigest-1ug-01	946	9549	373.1	592.1	0	29.61	0.5329	1.8	5.926	0.7543	12.73
20140904-PurClathDigest-1ug-01	947	9557	373.6	591.8	0	29.59	0.5246	1.773	5.914	0.7443	12.59
20140904-PurClathDigest-1ug-01	948	9565	374.1	591.4	0	29.57	0.5164	1.746	5.902	0.7343	12.44
20140904-PurClathDigest-1ug-01	949	9573	374.6	591.1	0	29.55	0.5082	1.72	5.89	0.7243	12.3
20140904-PurClathDigest-1ug-01	950	9581	375.1	590.7	0	29.54	0.5	1.693	5.879	0.7143	12.15
20140904-PurClathDigest-1ug-01	951	9566	374.7	588.6	0	29.43	0.4975	1.691	5.86	0.7104	12.12
20140904-PurClathDigest-1ug-01	952	9551	374.3	586.4	0	29.32	0.495	1.688	5.842	0.7064	12.09
20140904-PurClathDigest-1ug-01	953	9536	373.9	584.3	0	29.22	0.4925	1.686	5.824	0.7025	12.06
20140904-PurClathDigest-1ug-01	954	9521	373.5	582.2	0	29.11	0.49	1.683	5.806	0.6986	12.03
20140904-PurClathDigest-1ug-01	955	9507	373	580	0	29	0.4875	1.681	5.787	0.6946	12
20140904-PurClathDigest-1ug-01	956	9492	372.6	577.9	0	28.9	0.485	1.678	5.769	0.6907	11.97
20140904-PurClathDigest-1ug-01	957	9477	372.2	575.8	0	28.79	0.4825	1.676	5.751	0.6868	11.94
20140904-PurClathDigest-1ug-01	958	9462	371.8	573.6	0	28.68	0.48	1.674	5.733	0.6829	11.91
20140904-PurClathDigest-1ug-01	959	9447	371.4	571.5	0	28.57	0.4775	1.671	5.715	0.6789	11.88
20140904-PurClathDigest-1ug-01	960	9432	371	569.4	0	28.47	0.475	1.669	5.696	0.675	11.85
20140904-PurClathDigest-1ug-01	961	9418	370.6	567.2	0	28.36	0.4725	1.666	5.678	0.6711	11.82
20140904-PurClathDigest-1ug-01	962	9403	370.2	565.1	0	28.25	0.47	1.663	5.66	0.6671	11.79
20140904-PurClathDigest-1ug-01	963	9388	369.8	562.9	0	28.15	0.4675	1.661	5.642	0.6632	11.76
20140904-PurClathDigest-1ug-01	964	9373	369.3	560.8	0	28.04	0.465	1.658	5.624	0.6593	11.72
20140904-PurClathDigest-1ug-01	965	9358	368.9	558.7	0	27.93	0.4625	1.656	5.605	0.6554	11.69
20140904-PurClathDigest-1ug-01	966	9344	368.5	556.5	0	27.83	0.46	1.653	5.587	0.6514	11.66
20140904-PurClathDigest-1ug-01	967	9329	368.1	554.4	0	27.72	0.4575	1.65	5.569	0.6475	11.63
20140904-PurClathDigest-1ug-01	968	9314	367.7	552.3	0	27.61	0.455	1.648	5.551	0.6436	11.59
20140904-PurClathDigest-1ug-01	969	9299	367.3	550.1	0	27.51	0.4525	1.645	5.532	0.6396	11.56
20140904-PurClathDigest-1ug-01	970	9284	366.9	548	0	27.4	0.45	1.642	5.514	0.6357	11.53
20140904-PurClathDigest-1ug-01	971	9280	366.8	547.5	0	27.37	0.4504	1.645	5.508	0.6361	11.55
20140904-PurClathDigest-1ug-01	972	9276	366.6	547	0	27.35	0.4507	1.648	5.502	0.6364	11.57
20140904-PurClathDigest-1ug-01	973	9272	366.5	546.4	0	27.32	0.4511	1.651	5.496	0.6368	11.59
20140904-PurClathDigest-1ug-01	974	9268	366.4	545.9	0	27.3	0.4514	1.654	5.49	0.6371	11.61
20140904-PurClathDigest-1ug-01	975	9263	366.3	545.4	0	27.27	0.4518	1.657	5.484	0.6375	11.62
20140904-PurClathDigest-1ug-01	976	9259	366.2	544.9	0	27.24	0.4521	1.66	5.478	0.6379	11.64
20140904-PurClathDigest-1ug-01	977	9255	366.1	544.4	0	27.22	0.4525	1.663	5.472	0.6382	11.66
20140904-PurClathDigest-1ug-01	978	9251	365.9	543.8	0	27.19	0.4529	1.665	5.466	0.6386	11.68
20140904-PurClathDigest-1ug-01	979	9246	365.8	543.3	0	27.17	0.4532	1.668	5.46	0.6389	11.7
20140904-PurClathDigest-1ug-01	980	9242	365.7	542.8	0	27.14	0.4536	1.671	5.454	0.6393	11.72
20140904-PurClathDigest-1ug-01	981	9238	365.6	542.3	0	27.11	0.4539	1.674	5.447	0.6396	11.74
20140904-PurClathDigest-1ug-01	982	9234	365.5	541.7	0	27.09	0.4543	1.677	5.441	0.64	11.76
20140904-PurClathDigest-1ug-01	983	9230	365.4	541.2	0	27.06	0.4546	1.68	5.435	0.6404	11.78
20140904-PurClathDigest-1ug-01	984	9225	365.2	540.7	0	27.04	0.455	1.683	5.429	0.6407	11.8
20140904-PurClathDigest-1ug-01	985	9221	365.1	540.2	0	27.01	0.4554	1.686	5.423	0.6411	11.82
20140904-PurClathDigest-1ug-01	986	9217	365	539.7	0	26.98	0.4557	1.689	5.417	0.6414	11.84
20140904-PurClathDigest-1ug-01	987	9213	364.9	539.1	0	26.96	0.4561	1.692	5.411	0.6418	11.86
20140904-PurClathDigest-1ug-01	988	9208	364.8	538.6	0	26.93	0.4564	1.695	5.405	0.6421	11.88
20140904-PurClathDigest-1ug-01	989	9204	364.7	538.1	0	26.9	0.4568	1.698	5.399	0.6425	11.9
20140904-PurClathDigest-1ug-01	990	9200	364.6	537.6	0	26.88	0.4571	1.701	5.393	0.6429	11.92
20140904-PurClathDigest-1ug-01	991	9195	364.3	537.6	0	26.88	0.4614	1.717	5.392	0.6489	12.03
20140904-PurClathDigest-1ug-01	992	9190	364.1	537.7	0	26.88	0.4657	1.732	5.392	0.655	12.15
20140904-PurClathDigest-1ug-01	993	9185	363.9	537.7	0	26.89	0.47	1.748	5.392	0.6611	12.26
20140904-PurClathDigest-1ug-01	994	9180	363.6	537.8	0	26.89	0.4743	1.764	5.391	0.6671	12.37
20140904-PurClathDigest-1ug-01	995	9175	363.4	537.8	0	26.89	0.4786	1.78	5.391	0.6732	12.49
20140904-PurClathDigest-1ug-01	996	9170	363.2	537.9	0	26.89	0.4829	1.795	5.391	0.6793	12.6
20140904-PurClathDigest-1ug-01	997	9165	363	537.9	0	26.9	0.4871	1.811	5.39	0.6854	12.71
20140904-PurClathDigest-1ug-01	998	9160	362.7	538	0	26.9	0.4914	1.827	5.39	0.6914	12.83
20140904-PurClathDigest-1ug-01	999	9155	362.5	538	0	26.9	0.4957	1.843	5.39	0.6975	12.94
20140904-PurClathDigest-1ug-01	1000	9150	362.3	538.1	0	26.9	0.5	1.858	5.389	0.7036	13.06
20140904-PurClathDigest-1ug-01	1001	9145	362.1	538.1	0	26.91	0.5043	1.874	5.389	0.7096	13.17
20140904-PurClathDigest-1ug-01	1002	9140	361.8	538.2	0	26.91	0.5086	1.89	5.389	0.7157	13.28
20140904-PurClathDigest-1ug-01	1003	9135	361.6	538.2	0	26.91	0.5129	1.906	5.388	0.7218	13.4
20140904-PurClathDigest-1ug-01	1004	9130	361.4	538.3	0	26.91	0.5171	1.921	5.388	0.7279	13.51
20140904-PurClathDigest-1ug-01	1005	9125	361.2	538.3	0	26.92	0.5214	1.937	5.387	0.7339	13.62
20140904-PurClathDigest-1ug-01	1006	9120	360.9	538.4	0	26.92	0.5257	1.953	5.387	0.74	13.74
20140904-PurClathDigest-1ug-01	1007	9115	360.7	538.4	0	26.92	0.53	1.969	5.387	0.7461	13.85
20140904-PurClathDigest-1ug-01	1008	9110	360.5	538.5	0	26.92	0.5343	1.984	5.386	0.7521	13.96
20140904-PurClathDigest-1ug-01	1009	9105	360.3	538.5	0	26.93	0.5386	2	5.386	0.7582	14.08
20140904-PurClathDigest-1ug-01	1010	9100	360	538.6	0	26.93	0.5429	2.016	5.386	0.7643	14.19
20140904-PurClathDigest-1ug-01	1011	9095	359.8	538.7	0	26.94	0.5446	2.022	5.391	0.7729	14.34
20140904-PurClathDigest-1ug-01	1012	9089	359.6	538.9	0	26.95	0.5464	2.028	5.396	0.7814	14.48
20140904-PurClathDigest-1ug-01	1013	9084	359.3	539.1	0	26.95	0.5482	2.034	5.401	0.79	14.63
20140904-PurClathDigest-1ug-01	1014	9079	359.1	539.3	0	26.96	0.55	2.04	5.406	0.7986	14.77
20140904-PurClathDigest-1ug-01	1015	9074	358.8	539.4	0	26.97	0.5518	2.046	5.411	0.8071	14.92
20140904-PurClathDigest-1ug-01	1016	9068	358.6	539.6	0	26.98	0.5536	2.052	5.416	0.8157	15.06
20140904-PurClathDigest-1ug-01	1017	9063	358.4	539.8	0	26.99	0.5554	2.058	5.421	0.8243	15.21
20140904-PurClathDigest-1ug-01	1018	9058	358.1	539.9	0	27	0.5571	2.064	5.426	0.8329	15.35
20140904-PurClathDigest-1ug-01	1019	9052	357.9	540.1	0	27.01	0.5589	2.07	5.431	0.8414	15.49
20140904-PurClathDigest-1ug-01	1020	9047	357.6	540.3	0	27.01	0.5607	2.076	5.436	0.85	15.64
20140904-PurClathDigest-1ug-01	1021	9042	357.4	540.5	0	27.02	0.5625	2.082	5.441	0.8586	15.78
20140904-PurClathDigest-1ug-01	1022	9036	357.2	540.6	0	27.03	0.5643	2.088	5.446	0.8671	15.92
20140904-PurClathDigest-1ug-01	1023	9031	356.9	540.8	0	27.04	0.5661	2.093	5.451	0.8757	16.07
20140904-PurClathDigest-1ug-01	1024	9026	356.7	541	0	27.05	0.5679	2.099	5.456	0.8843	16.21
20140904-PurClathDigest-1ug-01	1025	9020	356.4	541.1	0	27.06	0.5696	2.105	5.461	0.8929	16.35
20140904-PurClathDigest-1ug-01	1026	9015	356.2	541.3	0	27.07	0.5714	2.111	5.466	0.9014	16.49
20140904-PurClathDigest-1ug-01	1027	9010	356	541.5	0	27.07	0.5732	2.117	5.471	0.91	16.63
20140904-PurClathDigest-1ug-01	1028	9004	355.7	541.7	0	27.08	0.575	2.123	5.476	0.9186	16.78
20140904-PurClathDigest-1ug-01	1029	8999	355.5	541.8	0	27.09	0.5768	2.129	5.481	0.9271	16.92
20140904-PurClathDigest-1ug-01	1030	8994	355.2	542	0	27.1	0.5786	2.135	5.486	0.9357	17.06
20140904-PurClathDigest-1ug-01	1031	8979	354.7	541.4	0	27.07	0.5775	2.133	5.47	0.9404	17.19
20140904-PurClathDigest-1ug-01	1032	8965	354.2	540.7	0	27.04	0.5764	2.132	5.454	0.945	17.33
20140904-PurClathDigest-1ug-01	1033	8951	353.6	540.1	0	27	0.5754	2.131	5.437	0.9496	17.46
20140904-PurClathDigest-1ug-01	1034	8937	353.1	539.5	0	26.97	0.5743	2.129	5.421	0.9543	17.6
20140904-PurClathDigest-1ug-01	1035	8923	352.5	538.8	0	26.94	0.5732	2.128	5.405	0.9589	17.74
20140904-PurClathDigest-1ug-01	1036	8909	352	538.2	0	26.91	0.5721	2.126	5.389	0.9636	17.88
20140904-PurClathDigest-1ug-01	1037	8895	351.4	537.6	0	26.88	0.5711	2.125	5.373	0.9682	18.02
20140904-PurClathDigest-1ug-01	1038	8881	350.9	536.9	0	26.85	0.57	2.123	5.357	0.9729	18.16
20140904-PurClathDigest-1ug-01	1039	8867	350.3	536.3	0	26.81	0.5689	2.122	5.341	0.9775	18.3
20140904-PurClathDigest-1ug-01	1040	8853	349.8	535.6	0	26.78	0.5679	2.12	5.325	0.9821	18.44
20140904-PurClathDigest-1ug-01	1041	8839	349.2	535	0	26.75	0.5668	2.119	5.309	0.9868	18.59
20140904-PurClathDigest-1ug-01	1042	8825	348.7	534.4	0	26.72	0.5657	2.117	5.293	0.9914	18.73
20140904-PurClathDigest-1ug-01	1043	8811	348.2	533.7	0	26.69	0.5646	2.116	5.277	0.9961	18.88
20140904-PurClathDigest-1ug-01	1044	8796	347.6	533.1	0	26.66	0.5636	2.114	5.261	1.001	19.02
20140904-PurClathDigest-1ug-01	1045	8782	347.1	532.5	0	26.62	0.5625	2.113	5.245	1.005	19.17
20140904-PurClathDigest-1ug-01	1046	8768	346.5	531.8	0	26.59	0.5614	2.111	5.229	1.01	19.32
20140904-PurClathDigest-1ug-01	1047	8754	346	531.2	0	26.56	0.5604	2.11	5.212	1.015	19.47
20140904-PurClathDigest-1ug-01	1048	8740	345.4	530.6	0	26.53	0.5593	2.108	5.196	1.019	19.62
20140904-PurClathDigest-1ug-01	1049	8726	344.9	529.9	0	26.5	0.5582	2.107	5.18	1.024	19.77
20140904-PurClathDigest-1ug-01	1050	8712	344.3	529.3	0	26.46	0.5571	2.105	5.164	1.029	19.92
20140904-PurClathDigest-1ug-01	1051	8701	343.9	528.5	0	26.43	0.5568	2.107	5.157	1.027	19.92
20140904-PurClathDigest-1ug-01	1052	8690	343.5	527.8	0	26.39	0.5564	2.109	5.15	1.026	19.92
20140904-PurClathDigest-1ug-01	1053	8679	343.1	527	0	26.35	0.5561	2.11	5.143	1.024	19.92
20140904-PurClathDigest-1ug-01	1054	8668	342.6	526.3	0	26.31	0.5557	2.112	5.136	1.023	19.92
20140904-PurClathDigest-1ug-01	1055	8656	342.2	525.5	0	26.28	0.5554	2.113	5.129	1.021	19.92
20140904-PurClathDigest-1ug-01	1056	8645	341.8	524.8	0	26.24	0.555	2.115	5.121	1.02	19.92
20140904-PurClathDigest-1ug-01	1057	8634	341.4	524	0	26.2	0.5546	2.117	5.114	1.019	19.92
20140904-PurClathDigest-1ug-01	1058	8623	340.9	523.3	0	26.16	0.5543	2.118	5.107	1.017	19.92
20140904-PurClathDigest-1ug-01	1059	8612	340.5	522.5	0	26.13	0.5539	2.12	5.1	1.016	19.92
20140904-PurClathDigest-1ug-01	1060	8601	340.1	521.8	0	26.09	0.5536	2.122	5.093	1.014	19.92
20140904-PurClathDigest-1ug-01	1061	8590	339.7	521	0	26.05	0.5532	2.124	5.086	1.013	19.92
20140904-PurClathDigest-1ug-01	1062	8579	339.3	520.3	0	26.01	0.5529	2.125	5.079	1.011	19.92
20140904-PurClathDigest-1ug-01	1063	8567	338.8	519.5	0	25.98	0.5525	2.127	5.071	1.01	19.92
20140904-PurClathDigest-1ug-01	1064	8556	338.4	518.8	0	25.94	0.5521	2.129	5.064	1.009	19.92
20140904-PurClathDigest-1ug-01	1065	8545	338	518	0	25.9	0.5518	2.13	5.057	1.007	19.92
20140904-PurClathDigest-1ug-01	1066	8534	337.6	517.3	0	25.86	0.5514	2.132	5.05	1.006	19.92
20140904-PurClathDigest-1ug-01	1067	8523	337.1	516.5	0	25.83	0.5511	2.134	5.043	1.004	19.92
20140904-PurClathDigest-1ug-01	1068	8512	336.7	515.8	0	25.79	0.5507	2.135	5.036	1.003	19.91
20140904-PurClathDigest-1ug-01	1069	8501	336.3	515	0	25.75	0.5504	2.137	5.029	1.001	19.91
20140904-PurClathDigest-1ug-01	1070	8490	335.9	514.3	0	25.71	0.55	2.139	5.021	1	19.91
20140904-PurClathDigest-1ug-01	1071	8476	335.5	512.5	0	25.63	0.5475	2.136	5.002	0.9954	19.9
20140904-PurClathDigest-1ug-01	1072	8463	335.1	510.8	0	25.54	0.545	2.134	4.984	0.9907	19.88
20140904-PurClathDigest-1ug-01	1073	8450	334.7	509	0	25.45	0.5425	2.132	4.965	0.9861	19.86
20140904-PurClathDigest-1ug-01	1074	8437	334.4	507.2	0	25.36	0.54	2.129	4.946	0.9814	19.84
20140904-PurClathDigest-1ug-01	1075	8424	334	505.5	0	25.27	0.5375	2.127	4.927	0.9768	19.83
20140904-PurClathDigest-1ug-01	1076	8411	333.6	503.7	0	25.19	0.535	2.124	4.908	0.9721	19.81
20140904-PurClathDigest-1ug-01	1077	8398	333.3	501.9	0	25.1	0.5325	2.122	4.889	0.9675	19.79
20140904-PurClathDigest-1ug-01	1078	8384	332.9	500.2	0	25.01	0.53	2.119	4.87	0.9629	19.77
20140904-PurClathDigest-1ug-01	1079	8371	332.5	498.4	0	24.92	0.5275	2.117	4.851	0.9582	19.75
20140904-PurClathDigest-1ug-01	1080	8358	332.1	496.6	0	24.83	0.525	2.114	4.832	0.9536	19.73
20140904-PurClathDigest-1ug-01	1081	8345	331.8	494.9	0	24.74	0.5225	2.112	4.813	0.9489	19.72
20140904-PurClathDigest-1ug-01	1082	8332	331.4	493.1	0	24.66	0.52	2.109	4.794	0.9443	19.7
20140904-PurClathDigest-1ug-01	1083	8319	331	491.4	0	24.57	0.5175	2.106	4.775	0.9396	19.68
20140904-PurClathDigest-1ug-01	1084	8305	330.6	489.6	0	24.48	0.515	2.104	4.756	0.935	19.66
20140904-PurClathDigest-1ug-01	1085	8292	330.3	487.8	0	24.39	0.5125	2.101	4.737	0.9304	19.64
20140904-PurClathDigest-1ug-01	1086	8279	329.9	486.1	0	24.3	0.51	2.099	4.719	0.9257	19.62
20140904-PurClathDigest-1ug-01	1087	8266	329.5	484.3	0	24.21	0.5075	2.096	4.7	0.9211	19.6
20140904-PurClathDigest-1ug-01	1088	8253	329.2	482.5	0	24.13	0.505	2.093	4.681	0.9164	19.58
20140904-PurClathDigest-1ug-01	1089	8240	328.8	480.8	0	24.04	0.5025	2.09	4.662	0.9118	19.56
20140904-PurClathDigest-1ug-01	1090	8227	328.4	479	0	23.95	0.5	2.088	4.643	0.9071	19.54
20140904-PurClathDigest-1ug-01	1091	8238	328.9	479.3	0	23.96	0.5046	2.106	4.654	0.9189	19.75
20140904-PurClathDigest-1ug-01	1092	8248	329.5	479.5	0	23.98	0.5093	2.124	4.665	0.9307	19.95
20140904-PurClathDigest-1ug-01	1093	8259	330	479.8	0	23.99	0.5139	2.142	4.676	0.9425	20.16
20140904-PurClathDigest-1ug-01	1094	8270	330.6	480.1	0	24	0.5186	2.16	4.687	0.9543	20.36
20140904-PurClathDigest-1ug-01	1095	8281	331.1	480.4	0	24.02	0.5232	2.178	4.698	0.9661	20.56
20140904-PurClathDigest-1ug-01	1096	8292	331.6	480.6	0	24.03	0.5279	2.197	4.709	0.9779	20.76
20140904-PurClathDigest-1ug-01	1097	8303	332.2	480.9	0	24.05	0.5325	2.215	4.72	0.9896	20.97
20140904-PurClathDigest-1ug-01	1098	8314	332.7	481.2	0	24.06	0.5371	2.233	4.731	1.001	21.17
20140904-PurClathDigest-1ug-01	1099	8325	333.3	481.4	0	24.07	0.5418	2.251	4.742	1.013	21.36
20140904-PurClathDigest-1ug-01	1100	8336	333.8	481.7	0	24.09	0.5464	2.269	4.754	1.025	21.56
20140904-PurClathDigest-1ug-01	1101	8347	334.3	482	0	24.1	0.5511	2.287	4.765	1.037	21.76
20140904-PurClathDigest-1ug-01	1102	8358	334.9	482.3	0	24.11	0.5557	2.305	4.776	1.049	21.96
20140904-PurClathDigest-1ug-01	1103	8369	335.4	482.5	0	24.13	0.5604	2.323	4.787	1.06	22.15
20140904-PurClathDigest-1ug-01	1104	8380	336	482.8	0	24.14	0.565	2.341	4.798	1.072	22.35
20140904-PurClathDigest-1ug-01	1105	8391	336.5	483.1	0	24.15	0.5696	2.358	4.809	1.084	22.54
20140904-PurClathDigest-1ug-01	1106	8402	337	483.3	0	24.17	0.5743	2.376	4.82	1.096	22.73
20140904-PurClathDigest-1ug-01	1107	8413	337.6	483.6	0	24.18	0.5789	2.394	4.831	1.108	22.92
20140904-PurClathDigest-1ug-01	1108	8424	338.1	483.9	0	24.19	0.5836	2.412	4.842	1.119	23.12
20140904-PurClathDigest-1ug-01	1109	8435	338.7	484.2	0	24.21	0.5882	2.43	4.853	1.131	23.31
20140904-PurClathDigest-1ug-01	1110	8446	339.2	484.4	0	24.22	0.5929	2.448	4.864	1.143	23.49
20140904-PurClathDigest-1ug-01	1111	8448	339.5	483.5	0	24.17	0.5929	2.452	4.85	1.142	23.55
20140904-PurClathDigest-1ug-01	1112	8450	339.7	482.5	0	24.13	0.5929	2.457	4.836	1.141	23.6
20140904-PurClathDigest-1ug-01	1113	8452	340	481.6	0	24.08	0.5929	2.462	4.822	1.141	23.65
20140904-PurClathDigest-1ug-01	1114	8455	340.3	480.7	0	24.03	0.5929	2.467	4.809	1.14	23.71
20140904-PurClathDigest-1ug-01	1115	8457	340.5	479.7	0	23.99	0.5929	2.472	4.795	1.139	23.76
20140904-PurClathDigest-1ug-01	1116	8459	340.8	478.8	0	23.94	0.5929	2.477	4.781	1.139	23.82
20140904-PurClathDigest-1ug-01	1117	8461	341	477.8	0	23.89	0.5929	2.481	4.767	1.138	23.87
20140904-PurClathDigest-1ug-01	1118	8464	341.3	476.9	0	23.84	0.5929	2.486	4.753	1.137	23.93
20140904-PurClathDigest-1ug-01	1119	8466	341.6	475.9	0	23.8	0.5929	2.491	4.739	1.136	23.98
20140904-PurClathDigest-1ug-01	1120	8468	341.8	475	0	23.75	0.5929	2.496	4.725	1.136	24.04
20140904-PurClathDigest-1ug-01	1121	8470	342.1	474.1	0	23.7	0.5929	2.501	4.711	1.135	24.09
20140904-PurClathDigest-1ug-01	1122	8473	342.4	473.1	0	23.66	0.5929	2.506	4.697	1.134	24.15
20140904-PurClathDigest-1ug-01	1123	8475	342.6	472.2	0	23.61	0.5929	2.511	4.683	1.134	24.2
20140904-PurClathDigest-1ug-01	1124	8477	342.9	471.2	0	23.56	0.5929	2.516	4.669	1.133	24.26
20140904-PurClathDigest-1ug-01	1125	8479	343.2	470.3	0	23.51	0.5929	2.521	4.655	1.132	24.32
20140904-PurClathDigest-1ug-01	1126	8482	343.4	469.3	0	23.47	0.5929	2.526	4.641	1.131	24.38
20140904-PurClathDigest-1ug-01	1127	8484	343.7	468.4	0	23.42	0.5929	2.531	4.627	1.131	24.43
20140904-PurClathDigest-1ug-01	1128	8486	344	467.5	0	23.37	0.5929	2.537	4.614	1.13	24.49
20140904-PurClathDigest-1ug-01	1129	8488	344.2	466.5	0	23.33	0.5929	2.542	4.6	1.129	24.55
20140904-PurClathDigest-1ug-01	1130	8491	344.5	465.6	0	23.28	0.5929	2.547	4.586	1.129	24.61
20140904-PurClathDigest-1ug-01	1131	8499	345.1	464.5	0	23.22	0.5868	2.527	4.566	1.12	24.53
20140904-PurClathDigest-1ug-01	1132	8508	345.8	463.4	0	23.17	0.5807	2.506	4.547	1.112	24.46
20140904-PurClathDigest-1ug-01	1133	8516	346.4	462.3	0	23.11	0.5746	2.486	4.528	1.104	24.38
20140904-PurClathDigest-1ug-01	1134	8524	347	461.2	0	23.06	0.5686	2.466	4.509	1.096	24.3
20140904-PurClathDigest-1ug-01	1135	8533	347.7	460.1	0	23.01	0.5625	2.445	4.489	1.088	24.22
20140904-PurClathDigest-1ug-01	1136	8541	348.3	459	0	22.95	0.5564	2.424	4.47	1.079	24.15
20140904-PurClathDigest-1ug-01	1137	8550	349	457.9	0	22.9	0.5504	2.404	4.451	1.071	24.07
20140904-PurClathDigest-1ug-01	1138	8558	349.6	456.8	0	22.84	0.5443	2.383	4.431	1.063	23.98
20140904-PurClathDigest-1ug-01	1139	8567	350.2	455.7	0	22.79	0.5382	2.362	4.412	1.055	23.9
20140904-PurClathDigest-1ug-01	1140	8575	350.9	454.6	0	22.73	0.5321	2.341	4.393	1.046	23.82
20140904-PurClathDigest-1ug-01	1141	8584	351.5	453.6	0	22.68	0.5261	2.32	4.374	1.038	23.74
20140904-PurClathDigest-1ug-01	1142	8592	352.2	452.5	0	22.62	0.52	2.299	4.354	1.03	23.65
20140904-PurClathDigest-1ug-01	1143	8601	352.8	451.4	0	22.57	0.5139	2.277	4.335	1.022	23.57
20140904-PurClathDigest-1ug-01	1144	8609	353.5	450.3	0	22.51	0.5079	2.256	4.316	1.014	23.49
20140904-PurClathDigest-1ug-01	1145	8618	354.1	449.2	0	22.46	0.5018	2.234	4.296	1.005	23.4
20140904-PurClathDigest-1ug-01	1146	8626	354.7	448.1	0	22.4	0.4957	2.213	4.277	0.9971	23.31
20140904-PurClathDigest-1ug-01	1147	8635	355.4	447	0	22.35	0.4896	2.191	4.258	0.9889	23.23
20140904-PurClathDigest-1ug-01	1148	8643	356	445.9	0	22.3	0.4836	2.169	4.239	0.9807	23.14
20140904-PurClathDigest-1ug-01	1149	8652	356.7	444.8	0	22.24	0.4775	2.147	4.219	0.9725	23.05
20140904-PurClathDigest-1ug-01	1150	8660	357.3	443.7	0	22.19	0.4714	2.125	4.2	0.9643	22.96
20140904-PurClathDigest-1ug-01	1151	8664	357.6	443.2	0	22.16	0.4693	2.118	4.199	0.9561	22.77
20140904-PurClathDigest-1ug-01	1152	8669	357.9	442.8	0	22.14	0.4671	2.11	4.198	0.9479	22.58
20140904-PurClathDigest-1ug-01	1153	8673	358.2	442.3	0	22.12	0.465	2.103	4.197	0.9396	22.39
20140904-PurClathDigest-1ug-01	1154	8677	358.5	441.8	0	22.09	0.4629	2.095	4.196	0.9314	22.2
20140904-PurClathDigest-1ug-01	1155	8682	358.8	441.4	0	22.07	0.4607	2.088	4.195	0.9232	22.01
20140904-PurClathDigest-1ug-01	1156	8686	359	440.9	0	22.04	0.4586	2.08	4.194	0.915	21.82
20140904-PurClathDigest-1ug-01	1157	8690	359.3	440.4	0	22.02	0.4564	2.073	4.192	0.9068	21.63
20140904-PurClathDigest-1ug-01	1158	8694	359.6	439.9	0	22	0.4543	2.065	4.191	0.8986	21.44
20140904-PurClathDigest-1ug-01	1159	8699	359.9	439.5	0	21.97	0.4521	2.058	4.19	0.8904	21.25
20140904-PurClathDigest-1ug-01	1160	8703	360.2	439	0	21.95	0.45	2.05	4.189	0.8821	21.06
20140904-PurClathDigest-1ug-01	1161	8707	360.5	438.5	0	21.93	0.4479	2.043	4.188	0.8739	20.87
20140904-PurClathDigest-1ug-01	1162	8712	360.8	438.1	0	21.9	0.4457	2.035	4.187	0.8657	20.68
20140904-PurClathDigest-1ug-01	1163	8716	361.1	437.6	0	21.88	0.4436	2.027	4.186	0.8575	20.48
20140904-PurClathDigest-1ug-01	1164	8720	361.4	437.1	0	21.86	0.4414	2.02	4.185	0.8493	20.29
20140904-PurClathDigest-1ug-01	1165	8724	361.7	436.6	0	21.83	0.4393	2.012	4.184	0.8411	20.1
20140904-PurClathDigest-1ug-01	1166	8729	361.9	436.2	0	21.81	0.4371	2.004	4.183	0.8329	19.91
20140904-PurClathDigest-1ug-01	1167	8733	362.2	435.7	0	21.79	0.435	1.997	4.182	0.8246	19.72
20140904-PurClathDigest-1ug-01	1168	8737	362.5	435.2	0	21.76	0.4329	1.989	4.181	0.8164	19.53
20140904-PurClathDigest-1ug-01	1169	8742	362.8	434.8	0	21.74	0.4307	1.981	4.18	0.8082	19.34
20140904-PurClathDigest-1ug-01	1170	8746	363.1	434.3	0	21.71	0.4286	1.974	4.179	0.8	19.15
20140904-PurClathDigest-1ug-01	1171	8745	363.2	433.3	0	21.66	0.4261	1.967	4.166	0.7904	18.97
20140904-PurClathDigest-1ug-01	1172	8744	363.3	432.3	0	21.61	0.4236	1.96	4.154	0.7807	18.79
20140904-PurClathDigest-1ug-01	1173	8743	363.3	431.3	0	21.56	0.4211	1.953	4.142	0.7711	18.62
20140904-PurClathDigest-1ug-01	1174	8742	363.4	430.3	0	21.51	0.4186	1.946	4.13	0.7614	18.44
20140904-PurClathDigest-1ug-01	1175	8740	363.5	429.3	0	21.46	0.4161	1.938	4.118	0.7518	18.26
20140904-PurClathDigest-1ug-01	1176	8739	363.6	428.3	0	21.41	0.4136	1.931	4.106	0.7421	18.08
20140904-PurClathDigest-1ug-01	1177	8738	363.7	427.3	0	21.36	0.4111	1.924	4.094	0.7325	17.89
20140904-PurClathDigest-1ug-01	1178	8737	363.7	426.3	0	21.31	0.4086	1.917	4.081	0.7229	17.71
20140904-PurClathDigest-1ug-01	1179	8736	363.8	425.3	0	21.26	0.4061	1.91	4.069	0.7132	17.53
20140904-PurClathDigest-1ug-01	1180	8735	363.9	424.3	0	21.21	0.4036	1.902	4.057	0.7036	17.34
20140904-PurClathDigest-1ug-01	1181	8734	364	423.3	0	21.16	0.4011	1.895	4.045	0.6939	17.16
20140904-PurClathDigest-1ug-01	1182	8733	364	422.3	0	21.11	0.3986	1.888	4.033	0.6843	16.97
20140904-PurClathDigest-1ug-01	1183	8732	364.1	421.3	0	21.06	0.3961	1.88	4.021	0.6746	16.78
20140904-PurClathDigest-1ug-01	1184	8730	364.2	420.3	0	21.01	0.3936	1.873	4.009	0.665	16.59
20140904-PurClathDigest-1ug-01	1185	8729	364.3	419.3	0	20.96	0.3911	1.865	3.996	0.6554	16.4
20140904-PurClathDigest-1ug-01	1186	8728	364.4	418.3	0	20.91	0.3886	1.858	3.984	0.6457	16.21
20140904-PurClathDigest-1ug-01	1187	8727	364.4	417.3	0	20.86	0.3861	1.85	3.972	0.6361	16.01
20140904-PurClathDigest-1ug-01	1188	8726	364.5	416.3	0	20.81	0.3836	1.843	3.96	0.6264	15.82
20140904-PurClathDigest-1ug-01	1189	8725	364.6	415.3	0	20.76	0.3811	1.835	3.948	0.6168	15.62
20140904-PurClathDigest-1ug-01	1190	8724	364.7	414.3	0	20.71	0.3786	1.828	3.936	0.6071	15.43
20140904-PurClathDigest-1ug-01	1191	8717	364.5	413.1	0	20.65	0.3746	1.814	3.928	0.6011	15.3
20140904-PurClathDigest-1ug-01	1192	8710	364.3	411.9	0	20.59	0.3707	1.8	3.92	0.595	15.18
20140904-PurClathDigest-1ug-01	1193	8702	364.1	410.6	0	20.53	0.3668	1.786	3.912	0.5889	15.05
20140904-PurClathDigest-1ug-01	1194	8695	364	409.4	0	20.47	0.3629	1.773	3.904	0.5829	14.93
20140904-PurClathDigest-1ug-01	1195	8688	363.8	408.2	0	20.41	0.3589	1.759	3.896	0.5768	14.8
20140904-PurClathDigest-1ug-01	1196	8681	363.6	407	0	20.35	0.355	1.744	3.889	0.5707	14.68
20140904-PurClathDigest-1ug-01	1197	8674	363.4	405.8	0	20.29	0.3511	1.73	3.881	0.5646	14.55
20140904-PurClathDigest-1ug-01	1198	8667	363.3	404.6	0	20.23	0.3471	1.716	3.873	0.5586	14.42
20140904-PurClathDigest-1ug-01	1199	8659	363.1	403.4	0	20.17	0.3432	1.702	3.865	0.5525	14.29
20140904-PurClathDigest-1ug-01	1200	8652	362.9	402.1	0	20.11	0.3393	1.687	3.857	0.5464	14.17
20140904-PurClathDigest-1ug-01	1201	8645	362.7	400.9	0	20.05	0.3354	1.673	3.849	0.5404	14.04
20140904-PurClathDigest-1ug-01	1202	8638	362.6	399.7	0	19.99	0.3314	1.658	3.841	0.5343	13.91
20140904-PurClathDigest-1ug-01	1203	8631	362.4	398.5	0	19.93	0.3275	1.644	3.834	0.5282	13.78
20140904-PurClathDigest-1ug-01	1204	8624	362.2	397.3	0	19.86	0.3236	1.629	3.826	0.5221	13.65
20140904-PurClathDigest-1ug-01	1205	8616	362	396.1	0	19.8	0.3196	1.614	3.818	0.5161	13.52
20140904-PurClathDigest-1ug-01	1206	8609	361.9	394.9	0	19.74	0.3157	1.599	3.81	0.51	13.39
20140904-PurClathDigest-1ug-01	1207	8602	361.7	393.6	0	19.68	0.3118	1.584	3.802	0.5039	13.25
20140904-PurClathDigest-1ug-01	1208	8595	361.5	392.4	0	19.62	0.3079	1.569	3.794	0.4979	13.12
20140904-PurClathDigest-1ug-01	1209	8588	361.3	391.2	0	19.56	0.3039	1.554	3.786	0.4918	12.99
20140904-PurClathDigest-1ug-01	1210	8581	361.2	390	0	19.5	0.3	1.538	3.779	0.4857	12.85
20140904-PurClathDigest-1ug-01	1211	8573	360.8	389.7	0	19.49	0.2986	1.532	3.785	0.4836	12.78
20140904-PurClathDigest-1ug-01	1212	8565	360.5	389.4	0	19.47	0.2971	1.526	3.791	0.4814	12.7
20140904-PurClathDigest-1ug-01	1213	8557	360.2	389.2	0	19.46	0.2957	1.52	3.798	0.4793	12.62
20140904-PurClathDigest-1ug-01	1214	8549	359.8	388.9	0	19.44	0.2943	1.513	3.804	0.4771	12.54
20140904-PurClathDigest-1ug-01	1215	8541	359.5	388.6	0	19.43	0.2929	1.507	3.811	0.475	12.46
20140904-PurClathDigest-1ug-01	1216	8533	359.2	388.3	0	19.42	0.2914	1.501	3.817	0.4729	12.39
20140904-PurClathDigest-1ug-01	1217	8526	358.8	388	0	19.4	0.29	1.495	3.824	0.4707	12.31
20140904-PurClathDigest-1ug-01	1218	8518	358.5	387.8	0	19.39	0.2886	1.488	3.83	0.4686	12.23
20140904-PurClathDigest-1ug-01	1219	8510	358.1	387.5	0	19.37	0.2871	1.482	3.836	0.4664	12.16
20140904-PurClathDigest-1ug-01	1220	8502	357.8	387.2	0	19.36	0.2857	1.476	3.843	0.4643	12.08
20140904-PurClathDigest-1ug-01	1221	8494	357.5	386.9	0	19.35	0.2843	1.469	3.849	0.4621	12.01
20140904-PurClathDigest-1ug-01	1222	8486	357.1	386.7	0	19.33	0.2829	1.463	3.856	0.46	11.93
20140904-PurClathDigest-1ug-01	1223	8478	356.8	386.4	0	19.32	0.2814	1.457	3.862	0.4579	11.86
20140904-PurClathDigest-1ug-01	1224	8471	356.5	386.1	0	19.31	0.28	1.45	3.869	0.4557	11.78
20140904-PurClathDigest-1ug-01	1225	8463	356.1	385.8	0	19.29	0.2786	1.444	3.875	0.4536	11.71
20140904-PurClathDigest-1ug-01	1226	8455	355.8	385.5	0	19.28	0.2771	1.438	3.881	0.4514	11.63
20140904-PurClathDigest-1ug-01	1227	8447	355.5	385.3	0	19.26	0.2757	1.431	3.888	0.4493	11.56
20140904-PurClathDigest-1ug-01	1228	8439	355.1	385	0	19.25	0.2743	1.425	3.894	0.4471	11.48
20140904-PurClathDigest-1ug-01	1229	8431	354.8	384.7	0	19.24	0.2729	1.419	3.901	0.445	11.41
20140904-PurClathDigest-1ug-01	1230	8423	354.4	384.4	0	19.22	0.2714	1.412	3.907	0.4429	11.33
20140904-PurClathDigest-1ug-01	1231	8403	353.6	383	0	19.15	0.2646	1.382	3.885	0.4293	11.05
20140904-PurClathDigest-1ug-01	1232	8382	352.8	381.5	0	19.08	0.2579	1.352	3.863	0.4157	10.76
20140904-PurClathDigest-1ug-01	1233	8362	352	380	0	19	0.2511	1.321	3.841	0.4021	10.47
20140904-PurClathDigest-1ug-01	1234	8341	351.2	378.6	0	18.93	0.2443	1.291	3.819	0.3886	10.18
20140904-PurClathDigest-1ug-01	1235	8320	350.4	377.1	0	18.86	0.2375	1.26	3.796	0.375	9.878
20140904-PurClathDigest-1ug-01	1236	8300	349.5	375.6	0	18.78	0.2307	1.228	3.774	0.3614	9.576
20140904-PurClathDigest-1ug-01	1237	8279	348.7	374.2	0	18.71	0.2239	1.197	3.752	0.3479	9.271
20140904-PurClathDigest-1ug-01	1238	8258	347.9	372.7	0	18.64	0.2171	1.165	3.73	0.3343	8.962
20140904-PurClathDigest-1ug-01	1239	8238	347.1	371.2	0	18.56	0.2104	1.133	3.708	0.3207	8.65
20140904-PurClathDigest-1ug-01	1240	8217	346.3	369.8	0	18.49	0.2036	1.101	3.686	0.3071	8.333
20140904-PurClathDigest-1ug-01	1241	8196	345.5	368.3	0	18.42	0.1968	1.069	3.664	0.2936	8.013
20140904-PurClathDigest-1ug-01	1242	8176	344.6	366.9	0	18.34	0.19	1.036	3.641	0.28	7.689
20140904-PurClathDigest-1ug-01	1243	8155	343.8	365.4	0	18.27	0.1832	1.003	3.619	0.2664	7.361
20140904-PurClathDigest-1ug-01	1244	8134	343	363.9	0	18.2	0.1764	0.9696	3.597	0.2529	7.029
20140904-PurClathDigest-1ug-01	1245	8114	342.2	362.5	0	18.12	0.1696	0.9361	3.575	0.2393	6.693
20140904-PurClathDigest-1ug-01	1246	8093	341.4	361	0	18.05	0.1629	0.9023	3.553	0.2257	6.353
20140904-PurClathDigest-1ug-01	1247	8072	340.6	359.5	0	17.98	0.1561	0.8682	3.531	0.2121	6.008
20140904-PurClathDigest-1ug-01	1248	8052	339.7	358.1	0	17.9	0.1493	0.8338	3.509	0.1986	5.66
20140904-PurClathDigest-1ug-01	1249	8031	338.9	356.6	0	17.83	0.1425	0.7992	3.486	0.185	5.306
20140904-PurClathDigest-1ug-01	1250	8011	338.1	355.1	0	17.76	0.1357	0.7643	3.464	0.1714	4.948
20140904-PurClathDigest-1ug-01	1251	7988	337.2	353.8	0	17.69	0.1325	0.7491	3.448	0.1671	4.848
20140904-PurClathDigest-1ug-01	1252	7964	336.3	352.4	0	17.62	0.1293	0.7338	3.431	0.1629	4.746
20140904-PurClathDigest-1ug-01	1253	7941	335.4	351	0	17.55	0.1261	0.7183	3.415	0.1586	4.643
20140904-PurClathDigest-1ug-01	1254	7918	334.5	349.6	0	17.48	0.1229	0.7028	3.399	0.1543	4.54
20140904-PurClathDigest-1ug-01	1255	7895	333.6	348.2	0	17.41	0.1196	0.6871	3.382	0.15	4.435
20140904-PurClathDigest-1ug-01	1256	7872	332.7	346.9	0	17.34	0.1164	0.6713	3.366	0.1457	4.329
20140904-PurClathDigest-1ug-01	1257	7849	331.8	345.5	0	17.27	0.1132	0.6554	3.349	0.1414	4.223
20140904-PurClathDigest-1ug-01	1258	7826	330.9	344.1	0	17.21	0.11	0.6393	3.333	0.1371	4.115
20140904-PurClathDigest-1ug-01	1259	7803	330	342.7	0	17.14	0.1068	0.6231	3.316	0.1329	4.006
20140904-PurClathDigest-1ug-01	1260	7780	329.1	341.4	0	17.07	0.1036	0.6068	3.3	0.1286	3.896
20140904-PurClathDigest-1ug-01	1261	7757	328.2	340	0	17	0.1004	0.5904	3.284	0.1243	3.785
20140904-PurClathDigest-1ug-01	1262	7734	327.3	338.6	0	16.93	0.09714	0.5738	3.267	0.12	3.673
20140904-PurClathDigest-1ug-01	1263	7711	326.4	337.2	0	16.86	0.09393	0.5571	3.251	0.1157	3.56
20140904-PurClathDigest-1ug-01	1264	7688	325.5	335.8	0	16.79	0.09071	0.5402	3.234	0.1114	3.445
20140904-PurClathDigest-1ug-01	1265	7665	324.6	334.5	0	16.72	0.0875	0.5232	3.218	0.1071	3.33
20140904-PurClathDigest-1ug-01	1266	7642	323.7	333.1	0	16.65	0.08429	0.5061	3.201	0.1029	3.213
20140904-PurClathDigest-1ug-01	1267	7618	322.8	331.7	0	16.59	0.08107	0.4888	3.185	0.09857	3.095
20140904-PurClathDigest-1ug-01	1268	7595	321.9	330.3	0	16.52	0.07786	0.4714	3.169	0.09429	2.976
20140904-PurClathDigest-1ug-01	1269	7572	320.9	329	0	16.45	0.07464	0.4538	3.152	0.09	2.855
20140904-PurClathDigest-1ug-01	1270	7549	320	327.6	0	16.38	0.07143	0.4361	3.136	0.08571	2.733
20140904-PurClathDigest-1ug-01	1271	7521	318.8	326.6	0	16.33	0.07214	0.4418	3.127	0.08643	2.764
20140904-PurClathDigest-1ug-01	1272	7492	317.5	325.5	0	16.28	0.07286	0.4476	3.119	0.08714	2.794
20140904-PurClathDigest-1ug-01	1273	7463	316.2	324.5	0	16.23	0.07357	0.4534	3.11	0.08786	2.825
20140904-PurClathDigest-1ug-01	1274	7435	315	323.5	0	16.17	0.07429	0.4593	3.101	0.08857	2.856
20140904-PurClathDigest-1ug-01	1275	7406	313.7	322.5	0	16.12	0.075	0.4652	3.093	0.08929	2.887
20140904-PurClathDigest-1ug-01	1276	7378	312.4	321.4	0	16.07	0.07571	0.4711	3.084	0.09	2.918
20140904-PurClathDigest-1ug-01	1277	7349	311.1	320.4	0	16.02	0.07643	0.4771	3.076	0.09071	2.949
20140904-PurClathDigest-1ug-01	1278	7320	309.9	319.4	0	15.97	0.07714	0.483	3.067	0.09143	2.981
20140904-PurClathDigest-1ug-01	1279	7292	308.6	318.4	0	15.92	0.07786	0.4891	3.059	0.09214	3.013
20140904-PurClathDigest-1ug-01	1280	7263	307.3	317.4	0	15.87	0.07857	0.4952	3.05	0.09286	3.044
20140904-PurClathDigest-1ug-01	1281	7234	306	316.3	0	15.82	0.07929	0.5013	3.041	0.09357	3.077
20140904-PurClathDigest-1ug-01	1282	7206	304.8	315.3	0	15.77	0.08	0.5074	3.033	0.09429	3.109
20140904-PurClathDigest-1ug-01	1283	7177	303.5	314.3	0	15.71	0.08071	0.5136	3.024	0.095	3.141
20140904-PurClathDigest-1ug-01	1284	7148	302.2	313.3	0	15.66	0.08143	0.5199	3.016	0.09571	3.174
20140904-PurClathDigest-1ug-01	1285	7120	300.9	312.2	0	15.61	0.08214	0.5261	3.007	0.09643	3.207
20140904-PurClathDigest-1ug-01	1286	7091	299.7	311.2	0	15.56	0.08286	0.5325	2.999	0.09714	3.24
20140904-PurClathDigest-1ug-01	1287	7063	298.4	310.2	0	15.51	0.08357	0.5388	2.99	0.09786	3.273
20140904-PurClathDigest-1ug-01	1288	7034	297.1	309.2	0	15.46	0.08429	0.5452	2.981	0.09857	3.306
20140904-PurClathDigest-1ug-01	1289	7005	295.9	308.2	0	15.41	0.085	0.5517	2.973	0.09929	3.34
20140904-PurClathDigest-1ug-01	1290	6977	294.6	307.1	0	15.36	0.08571	0.5581	2.964	0.1	3.373
20140904-PurClathDigest-1ug-01	1291	6953	293.6	305.6	0	15.28	0.085	0.5562	2.944	0.09857	3.348
20140904-PurClathDigest-1ug-01	1292	6930	292.7	304.1	0	15.21	0.08429	0.5543	2.924	0.09714	3.323
20140904-PurClathDigest-1ug-01	1293	6906	291.7	302.6	0	15.13	0.08357	0.5524	2.903	0.09571	3.297
20140904-PurClathDigest-1ug-01	1294	6882	290.8	301.1	0	15.05	0.08286	0.5504	2.883	0.09429	3.271
20140904-PurClathDigest-1ug-01	1295	6859	289.8	299.5	0	14.98	0.08214	0.5485	2.862	0.09286	3.244
20140904-PurClathDigest-1ug-01	1296	6835	288.9	298	0	14.9	0.08143	0.5465	2.842	0.09143	3.217
20140904-PurClathDigest-1ug-01	1297	6812	287.9	296.5	0	14.82	0.08071	0.5445	2.822	0.09	3.189
20140904-PurClathDigest-1ug-01	1298	6788	287	295	0	14.75	0.08	0.5424	2.801	0.08857	3.162
20140904-PurClathDigest-1ug-01	1299	6765	286	293.5	0	14.67	0.07929	0.5404	2.781	0.08714	3.133
20140904-PurClathDigest-1ug-01	1300	6741	285.1	291.9	0	14.6	0.07857	0.5383	2.761	0.08571	3.105
20140904-PurClathDigest-1ug-01	1301	6717	284.1	290.4	0	14.52	0.07786	0.5362	2.74	0.08429	3.076
20140904-PurClathDigest-1ug-01	1302	6694	283.2	288.9	0	14.44	0.07714	0.5341	2.72	0.08286	3.046
20140904-PurClathDigest-1ug-01	1303	6670	282.2	287.4	0	14.37	0.07643	0.5319	2.7	0.08143	3.016
20140904-PurClathDigest-1ug-01	1304	6647	281.3	285.8	0	14.29	0.07571	0.5298	2.679	0.08	2.986
20140904-PurClathDigest-1ug-01	1305	6623	280.3	284.3	0	14.22	0.075	0.5276	2.659	0.07857	2.955
20140904-PurClathDigest-1ug-01	1306	6599	279.4	282.8	0	14.14	0.07429	0.5254	2.639	0.07714	2.924
20140904-PurClathDigest-1ug-01	1307	6576	278.4	281.3	0	14.06	0.07357	0.5231	2.618	0.07571	2.892
20140904-PurClathDigest-1ug-01	1308	6552	277.5	279.8	0	13.99	0.07286	0.5209	2.598	0.07429	2.859
20140904-PurClathDigest-1ug-01	1309	6529	276.5	278.2	0	13.91	0.07214	0.5186	2.577	0.07286	2.827
20140904-PurClathDigest-1ug-01	1310	6505	275.6	276.7	0	13.84	0.07143	0.5163	2.557	0.07143	2.793
20140904-PurClathDigest-1ug-01	1311	6484	274.7	275.8	0	13.79	0.07107	0.5154	2.548	0.07071	2.775
20140904-PurClathDigest-1ug-01	1312	6464	273.8	274.9	0	13.74	0.07071	0.5146	2.539	0.07	2.757
20140904-PurClathDigest-1ug-01	1313	6443	272.9	273.9	0	13.7	0.07036	0.5137	2.529	0.06929	2.739
20140904-PurClathDigest-1ug-01	1314	6422	272	273	0	13.65	0.07	0.5128	2.52	0.06857	2.721
20140904-PurClathDigest-1ug-01	1315	6401	271.1	272.1	0	13.6	0.06964	0.5119	2.511	0.06786	2.703
20140904-PurClathDigest-1ug-01	1316	6380	270.3	271.1	0	13.56	0.06929	0.5111	2.501	0.06714	2.684
20140904-PurClathDigest-1ug-01	1317	6360	269.4	270.2	0	13.51	0.06893	0.5102	2.492	0.06643	2.666
20140904-PurClathDigest-1ug-01	1318	6339	268.5	269.3	0	13.46	0.06857	0.5093	2.483	0.06571	2.647
20140904-PurClathDigest-1ug-01	1319	6318	267.6	268.4	0	13.42	0.06821	0.5084	2.474	0.065	2.628
20140904-PurClathDigest-1ug-01	1320	6297	266.7	267.4	0	13.37	0.06786	0.5075	2.464	0.06429	2.609
20140904-PurClathDigest-1ug-01	1321	6277	265.8	266.5	0	13.33	0.0675	0.5066	2.455	0.06357	2.589
20140904-PurClathDigest-1ug-01	1322	6256	264.9	265.6	0	13.28	0.06714	0.5056	2.446	0.06286	2.57
20140904-PurClathDigest-1ug-01	1323	6235	264	264.6	0	13.23	0.06679	0.5047	2.436	0.06214	2.551
20140904-PurClathDigest-1ug-01	1324	6214	263.1	263.7	0	13.19	0.06643	0.5038	2.427	0.06143	2.531
20140904-PurClathDigest-1ug-01	1325	6193	262.2	262.8	0	13.14	0.06607	0.5029	2.418	0.06071	2.511
20140904-PurClathDigest-1ug-01	1326	6173	261.3	261.9	0	13.09	0.06571	0.5019	2.409	0.06	2.491
20140904-PurClathDigest-1ug-01	1327	6152	260.4	260.9	0	13.05	0.06536	0.501	2.399	0.05929	2.471
20140904-PurClathDigest-1ug-01	1328	6131	259.6	260	0	13	0.065	0.5	2.39	0.05857	2.451
20140904-PurClathDigest-1ug-01	1329	6110	258.7	259.1	0	12.95	0.06464	0.499	2.381	0.05786	2.43
20140904-PurClathDigest-1ug-01	1330	6090	257.8	258.1	0	12.91	0.06429	0.4981	2.371	0.05714	2.41
20140904-PurClathDigest-1ug-01	1331	6076	257.2	257.5	0	12.87	0.06393	0.4966	2.361	0.05714	2.421
20140904-PurClathDigest-1ug-01	1332	6063	256.7	256.8	0	12.84	0.06357	0.4951	2.35	0.05714	2.432
20140904-PurClathDigest-1ug-01	1333	6049	256.1	256.1	0	12.81	0.06321	0.4936	2.339	0.05714	2.443
20140904-PurClathDigest-1ug-01	1334	6036	255.6	255.5	0	12.77	0.06286	0.4921	2.329	0.05714	2.454
20140904-PurClathDigest-1ug-01	1335	6022	255	254.8	0	12.74	0.0625	0.4906	2.318	0.05714	2.465
20140904-PurClathDigest-1ug-01	1336	6009	254.5	254.1	0	12.71	0.06214	0.4891	2.307	0.05714	2.477
20140904-PurClathDigest-1ug-01	1337	5995	253.9	253.4	0	12.67	0.06179	0.4876	2.296	0.05714	2.488
20140904-PurClathDigest-1ug-01	1338	5982	253.4	252.8	0	12.64	0.06143	0.486	2.286	0.05714	2.5
20140904-PurClathDigest-1ug-01	1339	5968	252.9	252.1	0	12.61	0.06107	0.4845	2.275	0.05714	2.512
20140904-PurClathDigest-1ug-01	1340	5955	252.3	251.4	0	12.57	0.06071	0.483	2.264	0.05714	2.524
20140904-PurClathDigest-1ug-01	1341	5941	251.8	250.8	0	12.54	0.06036	0.4814	2.254	0.05714	2.536
20140904-PurClathDigest-1ug-01	1342	5928	251.2	250.1	0	12.5	0.06	0.4798	2.243	0.05714	2.548
20140904-PurClathDigest-1ug-01	1343	5915	250.7	249.4	0	12.47	0.05964	0.4783	2.232	0.05714	2.56
20140904-PurClathDigest-1ug-01	1344	5901	250.1	248.7	0	12.44	0.05929	0.4767	2.221	0.05714	2.572
20140904-PurClathDigest-1ug-01	1345	5888	249.6	248.1	0	12.4	0.05893	0.4751	2.211	0.05714	2.585
20140904-PurClathDigest-1ug-01	1346	5874	249	247.4	0	12.37	0.05857	0.4735	2.2	0.05714	2.597
20140904-PurClathDigest-1ug-01	1347	5861	248.5	246.7	0	12.34	0.05821	0.4719	2.189	0.05714	2.61
20140904-PurClathDigest-1ug-01	1348	5847	247.9	246.1	0	12.3	0.05786	0.4703	2.179	0.05714	2.623
20140904-PurClathDigest-1ug-01	1349	5834	247.4	245.4	0	12.27	0.0575	0.4686	2.168	0.05714	2.636
20140904-PurClathDigest-1ug-01	1350	5820	246.9	244.7	0	12.24	0.05714	0.467	2.157	0.05714	2.649
20140904-PurClathDigest-1ug-01	1351	5803	246.2	243.4	0	12.17	0.05679	0.4666	2.137	0.05714	2.674
20140904-PurClathDigest-1ug-01	1352	5785	245.6	242.1	0	12.1	0.05643	0.4662	2.116	0.05714	2.7
20140904-PurClathDigest-1ug-01	1353	5767	244.9	240.8	0	12.04	0.05607	0.4658	2.096	0.05714	2.726
20140904-PurClathDigest-1ug-01	1354	5750	244.3	239.5	0	11.97	0.05571	0.4653	2.076	0.05714	2.753
20140904-PurClathDigest-1ug-01	1355	5732	243.6	238.1	0	11.91	0.05536	0.4649	2.055	0.05714	2.78
20140904-PurClathDigest-1ug-01	1356	5714	243	236.8	0	11.84	0.055	0.4645	2.035	0.05714	2.808
20140904-PurClathDigest-1ug-01	1357	5697	242.3	235.5	0	11.78	0.05464	0.464	2.015	0.05714	2.836
20140904-PurClathDigest-1ug-01	1358	5679	241.7	234.2	0	11.71	0.05429	0.4636	1.994	0.05714	2.865
20140904-PurClathDigest-1ug-01	1359	5661	241	232.9	0	11.64	0.05393	0.4631	1.974	0.05714	2.895
20140904-PurClathDigest-1ug-01	1360	5644	240.4	231.6	0	11.58	0.05357	0.4627	1.954	0.05714	2.925
20140904-PurClathDigest-1ug-01	1361	5626	239.7	230.3	0	11.51	0.05321	0.4622	1.933	0.05714	2.956
20140904-PurClathDigest-1ug-01	1362	5608	239.1	228.9	0	11.45	0.05286	0.4617	1.913	0.05714	2.987
20140904-PurClathDigest-1ug-01	1363	5591	238.4	227.6	0	11.38	0.0525	0.4613	1.893	0.05714	3.019
20140904-PurClathDigest-1ug-01	1364	5573	237.8	226.3	0	11.32	0.05214	0.4608	1.872	0.05714	3.052
20140904-PurClathDigest-1ug-01	1365	5556	237.2	225	0	11.25	0.05179	0.4603	1.852	0.05714	3.086
20140904-PurClathDigest-1ug-01	1366	5538	236.5	223.7	0	11.18	0.05143	0.4598	1.831	0.05714	3.12
20140904-PurClathDigest-1ug-01	1367	5520	235.9	222.4	0	11.12	0.05107	0.4593	1.811	0.05714	3.155
20140904-PurClathDigest-1ug-01	1368	5503	235.2	221.1	0	11.05	0.05071	0.4588	1.791	0.05714	3.191
20140904-PurClathDigest-1ug-01	1369	5485	234.6	219.7	0	10.99	0.05036	0.4583	1.77	0.05714	3.228
20140904-PurClathDigest-1ug-01	1370	5467	233.9	218.4	0	10.92	0.05	0.4578	1.75	0.05714	3.265
20140904-PurClathDigest-1ug-01	1371	5454	233.3	217.9	0	10.89	0.05107	0.4688	1.746	0.05857	3.355
20140904-PurClathDigest-1ug-01	1372	5440	232.8	217.3	0	10.87	0.05214	0.4799	1.741	0.06	3.445
20140904-PurClathDigest-1ug-01	1373	5426	232.2	216.8	0	10.84	0.05321	0.491	1.737	0.06143	3.536
20140904-PurClathDigest-1ug-01	1374	5412	231.6	216.2	0	10.81	0.05429	0.5021	1.733	0.06286	3.627
20140904-PurClathDigest-1ug-01	1375	5398	231	215.7	0	10.78	0.05536	0.5133	1.729	0.06429	3.719
20140904-PurClathDigest-1ug-01	1376	5385	230.4	215.1	0	10.76	0.05643	0.5246	1.724	0.06571	3.811
20140904-PurClathDigest-1ug-01	1377	5371	229.8	214.6	0	10.73	0.0575	0.5359	1.72	0.06714	3.904
20140904-PurClathDigest-1ug-01	1378	5357	229.2	214	0	10.7	0.05857	0.5473	1.716	0.06857	3.997
20140904-PurClathDigest-1ug-01	1379	5343	228.7	213.5	0	10.67	0.05964	0.5588	1.711	0.07	4.09
20140904-PurClathDigest-1ug-01	1380	5330	228.1	212.9	0	10.65	0.06071	0.5703	1.707	0.07143	4.184
20140904-PurClathDigest-1ug-01	1381	5316	227.5	212.4	0	10.62	0.06179	0.5818	1.703	0.07286	4.279
20140904-PurClathDigest-1ug-01	1382	5302	226.9	211.8	0	10.59	0.06286	0.5935	1.699	0.07429	4.373
20140904-PurClathDigest-1ug-01	1383	5288	226.3	211.3	0	10.56	0.06393	0.6052	1.694	0.07571	4.469
20140904-PurClathDigest-1ug-01	1384	5275	225.7	210.7	0	10.54	0.065	0.6169	1.69	0.07714	4.565
20140904-PurClathDigest-1ug-01	1385	5261	225.2	210.2	0	10.51	0.06607	0.6287	1.686	0.07857	4.661
20140904-PurClathDigest-1ug-01	1386	5247	224.6	209.6	0	10.48	0.06714	0.6406	1.681	0.08	4.758
20140904-PurClathDigest-1ug-01	1387	5233	224	209.1	0	10.45	0.06821	0.6525	1.677	0.08143	4.855
20140904-PurClathDigest-1ug-01	1388	5220	223.4	208.5	0	10.43	0.06929	0.6645	1.673	0.08286	4.953
20140904-PurClathDigest-1ug-01	1389	5206	222.8	208	0	10.4	0.07036	0.6766	1.669	0.08429	5.051
20140904-PurClathDigest-1ug-01	1390	5192	222.2	207.4	0	10.37	0.07143	0.6887	1.664	0.08571	5.15
20140904-PurClathDigest-1ug-01	1391	5183	221.8	206.9	0	10.34	0.07107	0.6871	1.661	0.08536	5.14
20140904-PurClathDigest-1ug-01	1392	5174	221.5	206.3	0	10.32	0.07071	0.6855	1.657	0.085	5.129
20140904-PurClathDigest-1ug-01	1393	5164	221.1	205.8	0	10.29	0.07036	0.6839	1.654	0.08464	5.119
20140904-PurClathDigest-1ug-01	1394	5155	220.7	205.2	0	10.26	0.07	0.6823	1.65	0.08429	5.108
20140904-PurClathDigest-1ug-01	1395	5146	220.3	204.6	0	10.23	0.06964	0.6806	1.646	0.08393	5.098
20140904-PurClathDigest-1ug-01	1396	5136	219.9	204.1	0	10.2	0.06929	0.679	1.643	0.08357	5.087
20140904-PurClathDigest-1ug-01	1397	5127	219.6	203.5	0	10.18	0.06893	0.6773	1.639	0.08321	5.076
20140904-PurClathDigest-1ug-01	1398	5118	219.2	203	0	10.15	0.06857	0.6757	1.636	0.08286	5.066
20140904-PurClathDigest-1ug-01	1399	5108	218.8	202.4	0	10.12	0.06821	0.674	1.632	0.0825	5.055
20140904-PurClathDigest-1ug-01	1400	5099	218.4	201.9	0	10.09	0.06786	0.6723	1.629	0.08214	5.044
20140904-PurClathDigest-1ug-01	1401	5090	218	201.3	0	10.07	0.0675	0.6706	1.625	0.08179	5.033
20140904-PurClathDigest-1ug-01	1402	5080	217.6	200.7	0	10.04	0.06714	0.6689	1.621	0.08143	5.022
20140904-PurClathDigest-1ug-01	1403	5071	217.3	200.2	0	10.01	0.06679	0.6672	1.618	0.08107	5.011
20140904-PurClathDigest-1ug-01	1404	5062	216.9	199.6	0	9.981	0.06643	0.6655	1.614	0.08071	5
20140904-PurClathDigest-1ug-01	1405	5053	216.5	199.1	0	9.954	0.06607	0.6638	1.611	0.08036	4.989
20140904-PurClathDigest-1ug-01	1406	5043	216.1	198.5	0	9.926	0.06571	0.6621	1.607	0.08	4.978
20140904-PurClathDigest-1ug-01	1407	5034	215.7	198	0	9.898	0.06536	0.6603	1.604	0.07964	4.967
20140904-PurClathDigest-1ug-01	1408	5025	215.4	197.4	0	9.87	0.065	0.6586	1.6	0.07929	4.955
20140904-PurClathDigest-1ug-01	1409	5015	215	196.8	0	9.842	0.06464	0.6568	1.596	0.07893	4.944
20140904-PurClathDigest-1ug-01	1410	5006	214.6	196.3	0	9.814	0.06429	0.655	1.593	0.07857	4.933
20140904-PurClathDigest-1ug-01	1411	4992	214	195.7	0	9.786	0.06393	0.6532	1.581	0.07821	4.947
20140904-PurClathDigest-1ug-01	1412	4977	213.4	195.2	0	9.759	0.06357	0.6514	1.569	0.07786	4.961
20140904-PurClathDigest-1ug-01	1413	4963	212.8	194.6	0	9.731	0.06321	0.6496	1.558	0.0775	4.976
20140904-PurClathDigest-1ug-01	1414	4948	212.2	194.1	0	9.703	0.06286	0.6478	1.546	0.07714	4.991
20140904-PurClathDigest-1ug-01	1415	4934	211.5	193.5	0	9.675	0.0625	0.646	1.534	0.07679	5.006
20140904-PurClathDigest-1ug-01	1416	4920	210.9	192.9	0	9.647	0.06214	0.6442	1.522	0.07643	5.021
20140904-PurClathDigest-1ug-01	1417	4905	210.3	192.4	0	9.619	0.06179	0.6423	1.51	0.07607	5.037
20140904-PurClathDigest-1ug-01	1418	4891	209.7	191.8	0	9.591	0.06143	0.6405	1.499	0.07571	5.052
20140904-PurClathDigest-1ug-01	1419	4877	209.1	191.3	0	9.564	0.06107	0.6386	1.487	0.07536	5.068
20140904-PurClathDigest-1ug-01	1420	4862	208.5	190.7	0	9.536	0.06071	0.6367	1.475	0.075	5.085
20140904-PurClathDigest-1ug-01	1421	4848	207.9	190.2	0	9.508	0.06036	0.6348	1.463	0.07464	5.101
20140904-PurClathDigest-1ug-01	1422	4833	207.3	189.6	0	9.48	0.06	0.6329	1.451	0.07429	5.118
20140904-PurClathDigest-1ug-01	1423	4819	206.7	189	0	9.452	0.05964	0.631	1.44	0.07393	5.135
20140904-PurClathDigest-1ug-01	1424	4805	206.1	188.5	0	9.424	0.05929	0.6291	1.428	0.07357	5.153
20140904-PurClathDigest-1ug-01	1425	4790	205.4	187.9	0	9.396	0.05893	0.6271	1.416	0.07321	5.17
20140904-PurClathDigest-1ug-01	1426	4776	204.8	187.4	0	9.369	0.05857	0.6252	1.404	0.07286	5.188
20140904-PurClathDigest-1ug-01	1427	4762	204.2	186.8	0	9.341	0.05821	0.6232	1.393	0.0725	5.206
20140904-PurClathDigest-1ug-01	1428	4747	203.6	186.3	0	9.313	0.05786	0.6213	1.381	0.07214	5.225
20140904-PurClathDigest-1ug-01	1429	4733	203	185.7	0	9.285	0.0575	0.6193	1.369	0.07179	5.244
20140904-PurClathDigest-1ug-01	1430	4718	202.4	185.1	0	9.257	0.05714	0.6173	1.357	0.07143	5.263
20140904-PurClathDigest-1ug-01	1431	4678	200.7	183.5	0	9.175	0.05643	0.615	1.342	0.07071	5.27
20140904-PurClathDigest-1ug-01	1432	4638	199	181.9	0	9.093	0.05571	0.6127	1.326	0.07	5.277
20140904-PurClathDigest-1ug-01	1433	4598	197.3	180.2	0	9.011	0.055	0.6104	1.311	0.06929	5.285
20140904-PurClathDigest-1ug-01	1434	4558	195.6	178.6	0	8.929	0.05429	0.608	1.296	0.06857	5.292
20140904-PurClathDigest-1ug-01	1435	4518	193.9	176.9	0	8.846	0.05357	0.6056	1.28	0.06786	5.3
20140904-PurClathDigest-1ug-01	1436	4478	192.2	175.3	0	8.764	0.05286	0.6031	1.265	0.06714	5.308
20140904-PurClathDigest-1ug-01	1437	4438	190.5	173.6	0	8.682	0.05214	0.6006	1.25	0.06643	5.316
20140904-PurClathDigest-1ug-01	1438	4398	188.8	172	0	8.6	0.05143	0.598	1.234	0.06571	5.324
20140904-PurClathDigest-1ug-01	1439	4358	187.1	170.4	0	8.518	0.05071	0.5954	1.219	0.065	5.333
20140904-PurClathDigest-1ug-01	1440	4318	185.4	168.7	0	8.436	0.05	0.5927	1.204	0.06429	5.341
20140904-PurClathDigest-1ug-01	1441	4279	183.7	167.1	0	8.354	0.04929	0.59	1.188	0.06357	5.35
20140904-PurClathDigest-1ug-01	1442	4239	182	165.4	0	8.271	0.04857	0.5872	1.173	0.06286	5.359
20140904-PurClathDigest-1ug-01	1443	4199	180.2	163.8	0	8.189	0.04786	0.5844	1.158	0.06214	5.369
20140904-PurClathDigest-1ug-01	1444	4159	178.5	162.1	0	8.107	0.04714	0.5815	1.142	0.06143	5.378
20140904-PurClathDigest-1ug-01	1445	4119	176.8	160.5	0	8.025	0.04643	0.5785	1.127	0.06071	5.388
20140904-PurClathDigest-1ug-01	1446	4079	175.1	158.9	0	7.943	0.04571	0.5755	1.111	0.06	5.398
20140904-PurClathDigest-1ug-01	1447	4039	173.4	157.2	0	7.861	0.045	0.5725	1.096	0.05929	5.409
20140904-PurClathDigest-1ug-01	1448	3999	171.7	155.6	0	7.779	0.04429	0.5693	1.081	0.05857	5.42
20140904-PurClathDigest-1ug-01	1449	3959	170	153.9	0	7.696	0.04357	0.5661	1.065	0.05786	5.431
20140904-PurClathDigest-1ug-01	1450	3919	168.3	152.3	0	7.614	0.04286	0.5629	1.05	0.05714	5.442
20140904-PurClathDigest-1ug-01	1451	3880	166.7	150.7	0	7.534	0.0425	0.5641	1.039	0.05714	5.502
20140904-PurClathDigest-1ug-01	1452	3842	165.1	149.1	0	7.453	0.04214	0.5655	1.027	0.05714	5.563
20140904-PurClathDigest-1ug-01	1453	3803	163.5	147.4	0	7.372	0.04179	0.5668	1.016	0.05714	5.626
20140904-PurClathDigest-1ug-01	1454	3765	161.8	145.8	0	7.291	0.04143	0.5682	1.004	0.05714	5.69
20140904-PurClathDigest-1ug-01	1455	3726	160.2	144.2	0	7.211	0.04107	0.5696	0.9929	0.05714	5.755
20140904-PurClathDigest-1ug-01	1456	3688	158.6	142.6	0	7.13	0.04071	0.571	0.9814	0.05714	5.822
20140904-PurClathDigest-1ug-01	1457	3650	157	141	0	7.049	0.04036	0.5725	0.97	0.05714	5.891
20140904-PurClathDigest-1ug-01	1458	3611	155.4	139.4	0	6.969	0.04	0.574	0.9586	0.05714	5.961
20140904-PurClathDigest-1ug-01	1459	3573	153.7	137.8	0	6.888	0.03964	0.5755	0.9471	0.05714	6.033
20140904-PurClathDigest-1ug-01	1460	3534	152.1	136.1	0	6.807	0.03929	0.5771	0.9357	0.05714	6.107
20140904-PurClathDigest-1ug-01	1461	3496	150.5	134.5	0	6.726	0.03893	0.5787	0.9243	0.05714	6.182
20140904-PurClathDigest-1ug-01	1462	3458	148.9	132.9	0	6.646	0.03857	0.5804	0.9129	0.05714	6.26
20140904-PurClathDigest-1ug-01	1463	3419	147.2	131.3	0	6.565	0.03821	0.5821	0.9014	0.05714	6.339
20140904-PurClathDigest-1ug-01	1464	3381	145.6	129.7	0	6.484	0.03786	0.5838	0.89	0.05714	6.421
20140904-PurClathDigest-1ug-01	1465	3342	144	128.1	0	6.404	0.0375	0.5856	0.8786	0.05714	6.504
20140904-PurClathDigest-1ug-01	1466	3304	142.4	126.5	0	6.323	0.03714	0.5874	0.8671	0.05714	6.59
20140904-PurClathDigest-1ug-01	1467	3265	140.8	124.8	0	6.242	0.03679	0.5893	0.8557	0.05714	6.678
20140904-PurClathDigest-1ug-01	1468	3227	139.1	123.2	0	6.161	0.03643	0.5912	0.8443	0.05714	6.768
20140904-PurClathDigest-1ug-01	1469	3189	137.5	121.6	0	6.081	0.03607	0.5932	0.8329	0.05714	6.861
20140904-PurClathDigest-1ug-01	1470	3150	135.9	120	0	6	0.03571	0.5952	0.8214	0.05714	6.957
20140904-PurClathDigest-1ug-01	1471	3133	135.2	119.4	0	5.969	0.03601	0.6033	0.8137	0.0572	7.03
20140904-PurClathDigest-1ug-01	1472	3116	134.4	118.8	0	5.938	0.03631	0.6114	0.806	0.05726	7.105
20140904-PurClathDigest-1ug-01	1473	3098	133.7	118.2	0	5.907	0.03661	0.6197	0.7982	0.05732	7.181
20140904-PurClathDigest-1ug-01	1474	3081	132.9	117.5	0	5.877	0.0369	0.628	0.7905	0.05738	7.259
20140904-PurClathDigest-1ug-01	1475	3064	132.2	116.9	0	5.846	0.0372	0.6364	0.7827	0.05744	7.338
20140904-PurClathDigest-1ug-01	1476	3047	131.4	116.3	0	5.815	0.0375	0.6449	0.775	0.0575	7.419
20140904-PurClathDigest-1ug-01	1477	3029	130.7	115.7	0	5.784	0.0378	0.6535	0.7673	0.05756	7.502
20140904-PurClathDigest-1ug-01	1478	3012	130	115.1	0	5.753	0.0381	0.6621	0.7595	0.05762	7.586
20140904-PurClathDigest-1ug-01	1479	2995	129.2	114.4	0	5.722	0.03839	0.6709	0.7518	0.05768	7.672
20140904-PurClathDigest-1ug-01	1480	2978	128.5	113.8	0	5.692	0.03869	0.6798	0.744	0.05774	7.76
20140904-PurClathDigest-1ug-01	1481	2960	127.7	113.2	0	5.661	0.03899	0.6887	0.7363	0.0578	7.85
20140904-PurClathDigest-1ug-01	1482	2943	127	112.6	0	5.63	0.03929	0.6978	0.7286	0.05786	7.941
20140904-PurClathDigest-1ug-01	1483	2926	126.2	112	0	5.599	0.03958	0.707	0.7208	0.05792	8.035
20140904-PurClathDigest-1ug-01	1484	2909	125.5	111.4	0	5.568	0.03988	0.7162	0.7131	0.05798	8.13
20140904-PurClathDigest-1ug-01	1485	2891	124.8	110.8	0	5.537	0.04018	0.7256	0.7054	0.05804	8.228
20140904-PurClathDigest-1ug-01	1486	2874	124	110.1	0	5.507	0.04048	0.735	0.6976	0.0581	8.328
20140904-PurClathDigest-1ug-01	1487	2857	123.3	109.5	0	5.476	0.04077	0.7446	0.6899	0.05815	8.43
20140904-PurClathDigest-1ug-01	1488	2840	122.5	108.9	0	5.445	0.04107	0.7543	0.6821	0.05821	8.534
20140904-PurClathDigest-1ug-01	1489	2822	121.8	108.3	0	5.414	0.04137	0.7641	0.6744	0.05827	8.641
20140904-PurClathDigest-1ug-01	1490	2805	121.1	107.7	0	5.383	0.04167	0.774	0.6667	0.05833	8.75
20140904-PurClathDigest-1ug-01	1491	2787	120.2	107.2	0	5.361	0.04158	0.7757	0.6628	0.05842	8.813
20140904-PurClathDigest-1ug-01	1492	2769	119.4	106.8	0	5.338	0.0415	0.7774	0.659	0.0585	8.877
20140904-PurClathDigest-1ug-01	1493	2750	118.5	106.3	0	5.315	0.04142	0.7792	0.6552	0.05858	8.942
20140904-PurClathDigest-1ug-01	1494	2732	117.7	105.9	0	5.293	0.04133	0.781	0.6513	0.05867	9.007
20140904-PurClathDigest-1ug-01	1495	2714	116.8	105.4	0	5.27	0.04125	0.7827	0.6475	0.05875	9.073
20140904-PurClathDigest-1ug-01	1496	2696	116	104.9	0	5.247	0.04117	0.7845	0.6437	0.05883	9.14
20140904-PurClathDigest-1ug-01	1497	2677	115.1	104.5	0	5.225	0.04108	0.7863	0.6398	0.05892	9.208
20140904-PurClathDigest-1ug-01	1498	2659	114.3	104	0	5.202	0.041	0.7882	0.636	0.059	9.277
20140904-PurClathDigest-1ug-01	1499	2641	113.4	103.6	0	5.179	0.04092	0.79	0.6322	0.05908	9.346
20140904-PurClathDigest-1ug-01	1500	2623	112.6	103.1	0	5.157	0.04083	0.7919	0.6283	0.05917	9.416
20140904-PurClathDigest-1ug-02	140	0	0	0	0	0	0	NaN	0	0
20140904-PurClathDigest-1ug-02	141	0	0	0	0	0	0	NaN	0	0
20140904-PurClathDigest-1ug-02	142	0	0	0	0	0	0	NaN	0	0
20140904-PurClathDigest-1ug-02	143	0	0	0	0	0	0	NaN	0	0
20140904-PurClathDigest-1ug-02	144	0	0	0	0	0	0	NaN	0	0
20140904-PurClathDigest-1ug-02	145	0	0	0	0	0	0	NaN	0	0
20140904-PurClathDigest-1ug-02	146	0	0	0	0	0	0	NaN	0	0
20140904-PurClathDigest-1ug-02	147	0	0	0	0	0	0	NaN	0	0
20140904-PurClathDigest-1ug-02	148	0	0	0	0	0	0	NaN	0	0
20140904-PurClathDigest-1ug-02	149	0	0	0	0	0	0	NaN	0	0
20140904-PurClathDigest-1ug-02	150	0	0	0	0	0	0	NaN	0	0
20140904-PurClathDigest-1ug-02	151	0	0	0	0	0	0	NaN	0	0
20140904-PurClathDigest-1ug-02	152	0	0	0	0	0	0	NaN	0	0
20140904-PurClathDigest-1ug-02	153	0	0	0	0	0	0	NaN	0	0
20140904-PurClathDigest-1ug-02	154	0	0	0	0	0	0	NaN	0	0
20140904-PurClathDigest-1ug-02	155	0	0	0	0	0	0	NaN	0	0
20140904-PurClathDigest-1ug-02	156	0	0	0	0	0	0	NaN	0	0
20140904-PurClathDigest-1ug-02	157	0	0	0	0	0	0	NaN	0	0
20140904-PurClathDigest-1ug-02	158	0	0	0	0	0	0	NaN	0	0
20140904-PurClathDigest-1ug-02	159	0	0	0	0	0	0	NaN	0	0
20140904-PurClathDigest-1ug-02	160	0	0	0	0	0	0	NaN	0	0
20140904-PurClathDigest-1ug-02	161	0	0	0	0	0	0	NaN	0	0
20140904-PurClathDigest-1ug-02	162	0	0	0	0	0	0	NaN	0	0
20140904-PurClathDigest-1ug-02	163	0	0	0	0	0	0	NaN	0	0
20140904-PurClathDigest-1ug-02	164	0	0	0	0	0	0	NaN	0	0
20140904-PurClathDigest-1ug-02	165	0	0	0	0	0	0	NaN	0	0
20140904-PurClathDigest-1ug-02	166	0	0	0	0	0	0	NaN	0	0
20140904-PurClathDigest-1ug-02	167	0	0	0	0	0	0	NaN	0	0
20140904-PurClathDigest-1ug-02	168	0	0	0	0	0	0	NaN	0	0
20140904-PurClathDigest-1ug-02	169	0	0	0	0	0	0	NaN	0	0
20140904-PurClathDigest-1ug-02	170	0	0	0	0	0	0	NaN	0	0
20140904-PurClathDigest-1ug-02	171	0	0	0	0	0	0	NaN	0	0
20140904-PurClathDigest-1ug-02	172	0	0	0	0	0	0	NaN	0	0
20140904-PurClathDigest-1ug-02	173	0	0	0	0	0	0	NaN	0	0
20140904-PurClathDigest-1ug-02	174	0	0	0	0	0	0	NaN	0	0
20140904-PurClathDigest-1ug-02	175	0	0	0	0	0	0	NaN	0	0
20140904-PurClathDigest-1ug-02	176	0	0	0	0	0	0	NaN	0	0
20140904-PurClathDigest-1ug-02	177	0	0	0	0	0	0	NaN	0	0
20140904-PurClathDigest-1ug-02	178	0	0	0	0	0	0	NaN	0	0
20140904-PurClathDigest-1ug-02	179	0	0	0	0	0	0	NaN	0	0
20140904-PurClathDigest-1ug-02	180	0	0	0	0	0	0	NaN	0	0
20140904-PurClathDigest-1ug-02	181	0	0	0	0	0	0	NaN	0	0
20140904-PurClathDigest-1ug-02	182	0	0	0	0	0	0	NaN	0	0
20140904-PurClathDigest-1ug-02	183	0	0	0	0	0	0	NaN	0	0
20140904-PurClathDigest-1ug-02	184	0	0	0	0	0	0	NaN	0	0
20140904-PurClathDigest-1ug-02	185	0	0	0	0	0	0	NaN	0	0
20140904-PurClathDigest-1ug-02	186	0	0	0	0	0	0	NaN	0	0
20140904-PurClathDigest-1ug-02	187	0	0	0	0	0	0	NaN	0	0
20140904-PurClathDigest-1ug-02	188	0	0	0	0	0	0	NaN	0	0
20140904-PurClathDigest-1ug-02	189	0	0	0	0	0	0	NaN	0	0
20140904-PurClathDigest-1ug-02	190	0	0	0	0	0	0	NaN	0	0
20140904-PurClathDigest-1ug-02	191	0	0	0	0	0	0	NaN	0	0
20140904-PurClathDigest-1ug-02	192	0	0	0	0	0	0	NaN	0	0
20140904-PurClathDigest-1ug-02	193	0	0	0	0	0	0	NaN	0	0
20140904-PurClathDigest-1ug-02	194	0	0	0	0	0	0	NaN	0	0
20140904-PurClathDigest-1ug-02	195	0	0	0	0	0	0	NaN	0	0
20140904-PurClathDigest-1ug-02	196	0	0	0	0	0	0	NaN	0	0
20140904-PurClathDigest-1ug-02	197	0	0	0	0	0	0	NaN	0	0
20140904-PurClathDigest-1ug-02	198	0	0	0	0	0	0	NaN	0	0
20140904-PurClathDigest-1ug-02	199	0	0	0	0	0	0	NaN	0	0
20140904-PurClathDigest-1ug-02	200	0	0	0	0	0	0	NaN	0	0
20140904-PurClathDigest-1ug-02	201	0	0	0	0	0	0	NaN	0	0
20140904-PurClathDigest-1ug-02	202	0	0	0	0	0	0	NaN	0	0
20140904-PurClathDigest-1ug-02	203	0	0	0	0	0	0	NaN	0	0
20140904-PurClathDigest-1ug-02	204	0	0	0	0	0	0	NaN	0	0
20140904-PurClathDigest-1ug-02	205	0	0	0	0	0	0	NaN	0	0
20140904-PurClathDigest-1ug-02	206	0	0	0	0	0	0	NaN	0	0
20140904-PurClathDigest-1ug-02	207	0	0	0	0	0	0	NaN	0	0
20140904-PurClathDigest-1ug-02	208	0	0	0	0	0	0	NaN	0	0
20140904-PurClathDigest-1ug-02	209	0	0	0	0	0	0	NaN	0	0
20140904-PurClathDigest-1ug-02	210	0	0	0	0	0	0	NaN	0	0
20140904-PurClathDigest-1ug-02	211	0	0	0	0	0	0	NaN	0	0
20140904-PurClathDigest-1ug-02	212	0	0	0	0	0	0	NaN	0	0
20140904-PurClathDigest-1ug-02	213	0	0	0	0	0	0	NaN	0	0
20140904-PurClathDigest-1ug-02	214	0	0	0	0	0	0	NaN	0	0
20140904-PurClathDigest-1ug-02	215	0	0	0	0	0	0	NaN	0	0
20140904-PurClathDigest-1ug-02	216	0	0	0	0	0	0	NaN	0	0
20140904-PurClathDigest-1ug-02	217	0	0	0	0	0	0	NaN	0	0
20140904-PurClathDigest-1ug-02	218	0	0	0	0	0	0	NaN	0	0
20140904-PurClathDigest-1ug-02	219	0	0	0	0	0	0	NaN	0	0
20140904-PurClathDigest-1ug-02	220	0	0	0	0	0	0	NaN	0	0
20140904-PurClathDigest-1ug-02	221	0	0	0	0	0	0	NaN	0	0
20140904-PurClathDigest-1ug-02	222	0	0	0	0	0	0	NaN	0	0
20140904-PurClathDigest-1ug-02	223	0	0	0	0	0	0	NaN	0	0
20140904-PurClathDigest-1ug-02	224	0	0	0	0	0	0	NaN	0	0
20140904-PurClathDigest-1ug-02	225	0	0	0	0	0	0	NaN	0	0
20140904-PurClathDigest-1ug-02	226	0	0	0	0	0	0	NaN	0	0
20140904-PurClathDigest-1ug-02	227	0	0	0	0	0	0	NaN	0	0
20140904-PurClathDigest-1ug-02	228	0	0	0	0	0	0	NaN	0	0
20140904-PurClathDigest-1ug-02	229	0	0	0	0	0	0	NaN	0	0
20140904-PurClathDigest-1ug-02	230	0	0	0	0	0	0	NaN	0	0
20140904-PurClathDigest-1ug-02	231	56.61	2.397	3.814	0	0.1907	0.002143	1.124	0.01036	0.002143	20.69
20140904-PurClathDigest-1ug-02	232	113.2	4.794	7.629	0	0.3814	0.004286	1.124	0.02071	0.004286	20.69
20140904-PurClathDigest-1ug-02	233	169.8	7.19	11.44	0	0.5721	0.006429	1.124	0.03107	0.006429	20.69
20140904-PurClathDigest-1ug-02	234	226.4	9.587	15.26	0	0.7629	0.008571	1.124	0.04143	0.008571	20.69
20140904-PurClathDigest-1ug-02	235	283	11.98	19.07	0	0.9536	0.01071	1.124	0.05179	0.01071	20.69
20140904-PurClathDigest-1ug-02	236	339.6	14.38	22.89	0	1.144	0.01286	1.124	0.06214	0.01286	20.69
20140904-PurClathDigest-1ug-02	237	396.2	16.78	26.7	0	1.335	0.015	1.124	0.0725	0.015	20.69
20140904-PurClathDigest-1ug-02	238	452.9	19.17	30.51	0	1.526	0.01714	1.124	0.08286	0.01714	20.69
20140904-PurClathDigest-1ug-02	239	509.5	21.57	34.33	0	1.716	0.01929	1.124	0.09321	0.01929	20.69
20140904-PurClathDigest-1ug-02	240	566.1	23.97	38.14	0	1.907	0.02143	1.124	0.1036	0.02143	20.69
20140904-PurClathDigest-1ug-02	241	622.7	26.36	41.96	0	2.098	0.02357	1.124	0.1139	0.02357	20.69
20140904-PurClathDigest-1ug-02	242	679.3	28.76	45.77	0	2.289	0.02571	1.124	0.1243	0.02571	20.69
20140904-PurClathDigest-1ug-02	243	735.9	31.16	49.59	0	2.479	0.02786	1.124	0.1346	0.02786	20.69
20140904-PurClathDigest-1ug-02	244	792.5	33.56	53.4	0	2.67	0.03	1.124	0.145	0.03	20.69
20140904-PurClathDigest-1ug-02	245	849.1	35.95	57.21	0	2.861	0.03214	1.124	0.1554	0.03214	20.69
20140904-PurClathDigest-1ug-02	246	905.7	38.35	61.03	0	3.051	0.03429	1.124	0.1657	0.03429	20.69
20140904-PurClathDigest-1ug-02	247	962.3	40.75	64.84	0	3.242	0.03643	1.124	0.1761	0.03643	20.69
20140904-PurClathDigest-1ug-02	248	1019	43.14	68.66	0	3.433	0.03857	1.124	0.1864	0.03857	20.69
20140904-PurClathDigest-1ug-02	249	1076	45.54	72.47	0	3.624	0.04071	1.124	0.1968	0.04071	20.69
20140904-PurClathDigest-1ug-02	250	1132	47.94	76.29	0	3.814	0.04286	1.124	0.2071	0.04286	20.69
20140904-PurClathDigest-1ug-02	251	1206	51.05	81.07	0	4.054	0.04714	1.163	0.2311	0.04893	21.17
20140904-PurClathDigest-1ug-02	252	1279	54.16	85.86	0	4.293	0.05143	1.198	0.255	0.055	21.57
20140904-PurClathDigest-1ug-02	253	1352	57.28	90.64	0	4.532	0.05571	1.229	0.2789	0.06107	21.9
20140904-PurClathDigest-1ug-02	254	1426	60.39	95.43	0	4.771	0.06	1.257	0.3029	0.06714	22.17
20140904-PurClathDigest-1ug-02	255	1499	63.5	100.2	0	5.011	0.06429	1.283	0.3268	0.07321	22.4
20140904-PurClathDigest-1ug-02	256	1573	66.62	105	0	5.25	0.06857	1.306	0.3507	0.07929	22.61
20140904-PurClathDigest-1ug-02	257	1646	69.73	109.8	0	5.489	0.07286	1.327	0.3746	0.08536	22.78
20140904-PurClathDigest-1ug-02	258	1720	72.84	114.6	0	5.729	0.07714	1.347	0.3986	0.09143	22.94
20140904-PurClathDigest-1ug-02	259	1793	75.95	119.4	0	5.968	0.08143	1.364	0.4225	0.0975	23.08
20140904-PurClathDigest-1ug-02	260	1866	79.07	124.1	0	6.207	0.08571	1.381	0.4464	0.1036	23.2
20140904-PurClathDigest-1ug-02	261	1940	82.18	128.9	0	6.446	0.09	1.396	0.4704	0.1096	23.31
20140904-PurClathDigest-1ug-02	262	2013	85.29	133.7	0	6.686	0.09429	1.41	0.4943	0.1157	23.41
20140904-PurClathDigest-1ug-02	263	2087	88.41	138.5	0	6.925	0.09857	1.423	0.5182	0.1218	23.5
20140904-PurClathDigest-1ug-02	264	2160	91.52	143.3	0	7.164	0.1029	1.436	0.5421	0.1279	23.58
20140904-PurClathDigest-1ug-02	265	2234	94.63	148.1	0	7.404	0.1071	1.447	0.5661	0.1339	23.66
20140904-PurClathDigest-1ug-02	266	2307	97.75	152.9	0	7.643	0.1114	1.458	0.59	0.14	23.73
20140904-PurClathDigest-1ug-02	267	2380	100.9	157.6	0	7.882	0.1157	1.468	0.6139	0.1461	23.79
20140904-PurClathDigest-1ug-02	268	2454	104	162.4	0	8.121	0.12	1.478	0.6379	0.1521	23.85
20140904-PurClathDigest-1ug-02	269	2527	107.1	167.2	0	8.361	0.1243	1.487	0.6618	0.1582	23.91
20140904-PurClathDigest-1ug-02	270	2601	110.2	172	0	8.6	0.1286	1.495	0.6857	0.1643	23.96
20140904-PurClathDigest-1ug-02	271	2673	113	178.5	0	8.927	0.1339	1.5	0.7082	0.1711	24.16
20140904-PurClathDigest-1ug-02	272	2745	115.9	185.1	0	9.254	0.1393	1.505	0.7307	0.1779	24.34
20140904-PurClathDigest-1ug-02	273	2818	118.7	191.6	0	9.58	0.1446	1.51	0.7532	0.1846	24.51
20140904-PurClathDigest-1ug-02	274	2890	121.6	198.1	0	9.907	0.15	1.514	0.7757	0.1914	24.68
20140904-PurClathDigest-1ug-02	275	2962	124.4	204.7	0	10.23	0.1554	1.518	0.7982	0.1982	24.83
20140904-PurClathDigest-1ug-02	276	3035	127.3	211.2	0	10.56	0.1607	1.522	0.8207	0.205	24.98
20140904-PurClathDigest-1ug-02	277	3107	130.1	217.8	0	10.89	0.1661	1.525	0.8432	0.2118	25.12
20140904-PurClathDigest-1ug-02	278	3179	133	224.3	0	11.21	0.1714	1.529	0.8657	0.2186	25.25
20140904-PurClathDigest-1ug-02	279	3252	135.8	230.8	0	11.54	0.1768	1.532	0.8882	0.2254	25.37
20140904-PurClathDigest-1ug-02	280	3324	138.7	237.4	0	11.87	0.1821	1.535	0.9107	0.2321	25.49
20140904-PurClathDigest-1ug-02	281	3396	141.5	243.9	0	12.19	0.1875	1.538	0.9332	0.2389	25.6
20140904-PurClathDigest-1ug-02	282	3469	144.4	250.4	0	12.52	0.1929	1.54	0.9557	0.2457	25.71
20140904-PurClathDigest-1ug-02	283	3541	147.2	257	0	12.85	0.1982	1.543	0.9782	0.2525	25.81
20140904-PurClathDigest-1ug-02	284	3613	150.1	263.5	0	13.18	0.2036	1.545	1.001	0.2593	25.91
20140904-PurClathDigest-1ug-02	285	3686	152.9	270	0	13.5	0.2089	1.547	1.023	0.2661	26
20140904-PurClathDigest-1ug-02	286	3758	155.8	276.6	0	13.83	0.2143	1.55	1.046	0.2729	26.09
20140904-PurClathDigest-1ug-02	287	3830	158.6	283.1	0	14.16	0.2196	1.552	1.068	0.2796	26.18
20140904-PurClathDigest-1ug-02	288	3903	161.5	289.6	0	14.48	0.225	1.554	1.091	0.2864	26.26
20140904-PurClathDigest-1ug-02	289	3975	164.3	296.2	0	14.81	0.2304	1.556	1.113	0.2932	26.34
20140904-PurClathDigest-1ug-02	290	4047	167.2	302.7	0	15.14	0.2357	1.557	1.136	0.3	26.42
20140904-PurClathDigest-1ug-02	291	4116	169.8	309	0	15.45	0.2432	1.574	1.161	0.3079	26.51
20140904-PurClathDigest-1ug-02	292	4184	172.4	315.3	0	15.76	0.2507	1.59	1.186	0.3157	26.61
20140904-PurClathDigest-1ug-02	293	4252	175	321.6	0	16.08	0.2582	1.606	1.212	0.3236	26.7
20140904-PurClathDigest-1ug-02	294	4320	177.7	327.9	0	16.39	0.2657	1.621	1.237	0.3314	26.79
20140904-PurClathDigest-1ug-02	295	4388	180.3	334.1	0	16.71	0.2732	1.635	1.262	0.3393	26.87
20140904-PurClathDigest-1ug-02	296	4456	182.9	340.4	0	17.02	0.2807	1.649	1.288	0.3471	26.96
20140904-PurClathDigest-1ug-02	297	4525	185.6	346.7	0	17.34	0.2882	1.663	1.313	0.355	27.03
20140904-PurClathDigest-1ug-02	298	4593	188.2	353	0	17.65	0.2957	1.675	1.339	0.3629	27.11
20140904-PurClathDigest-1ug-02	299	4661	190.8	359.3	0	17.96	0.3032	1.688	1.364	0.3707	27.18
20140904-PurClathDigest-1ug-02	300	4729	193.4	365.6	0	18.28	0.3107	1.7	1.389	0.3786	27.25
20140904-PurClathDigest-1ug-02	301	4797	196.1	371.9	0	18.59	0.3182	1.711	1.415	0.3864	27.32
20140904-PurClathDigest-1ug-02	302	4866	198.7	378.1	0	18.91	0.3257	1.723	1.44	0.3943	27.38
20140904-PurClathDigest-1ug-02	303	4934	201.3	384.4	0	19.22	0.3332	1.734	1.465	0.4021	27.44
20140904-PurClathDigest-1ug-02	304	5002	203.9	390.7	0	19.54	0.3407	1.744	1.491	0.41	27.5
20140904-PurClathDigest-1ug-02	305	5070	206.6	397	0	19.85	0.3482	1.754	1.516	0.4179	27.56
20140904-PurClathDigest-1ug-02	306	5138	209.2	403.3	0	20.16	0.3557	1.764	1.541	0.4257	27.62
20140904-PurClathDigest-1ug-02	307	5206	211.8	409.6	0	20.48	0.3632	1.774	1.567	0.4336	27.67
20140904-PurClathDigest-1ug-02	308	5275	214.5	415.9	0	20.79	0.3707	1.783	1.592	0.4414	27.73
20140904-PurClathDigest-1ug-02	309	5343	217.1	422.1	0	21.11	0.3782	1.792	1.617	0.4493	27.78
20140904-PurClathDigest-1ug-02	310	5411	219.7	428.4	0	21.42	0.3857	1.801	1.643	0.4571	27.83
20140904-PurClathDigest-1ug-02	311	5475	222.2	434.9	0	21.74	0.3943	1.813	1.673	0.4671	27.92
20140904-PurClathDigest-1ug-02	312	5540	224.6	441.4	0	22.07	0.4029	1.825	1.704	0.4771	28.01
20140904-PurClathDigest-1ug-02	313	5604	227	447.8	0	22.39	0.4114	1.837	1.734	0.4871	28.09
20140904-PurClathDigest-1ug-02	314	5669	229.5	454.3	0	22.72	0.42	1.849	1.764	0.4971	28.18
20140904-PurClathDigest-1ug-02	315	5733	231.9	460.8	0	23.04	0.4286	1.86	1.795	0.5071	28.26
20140904-PurClathDigest-1ug-02	316	5798	234.4	467.3	0	23.36	0.4371	1.871	1.825	0.5171	28.34
20140904-PurClathDigest-1ug-02	317	5862	236.8	473.7	0	23.69	0.4457	1.882	1.855	0.5271	28.41
20140904-PurClathDigest-1ug-02	318	5927	239.2	480.2	0	24.01	0.4543	1.892	1.886	0.5371	28.48
20140904-PurClathDigest-1ug-02	319	5991	241.7	486.7	0	24.33	0.4629	1.902	1.916	0.5471	28.56
20140904-PurClathDigest-1ug-02	320	6056	244.1	493.1	0	24.66	0.4714	1.912	1.946	0.5571	28.62
20140904-PurClathDigest-1ug-02	321	6120	246.6	499.6	0	24.98	0.48	1.921	1.977	0.5671	28.69
20140904-PurClathDigest-1ug-02	322	6185	249	506.1	0	25.3	0.4886	1.931	2.007	0.5771	28.75
20140904-PurClathDigest-1ug-02	323	6249	251.4	512.6	0	25.63	0.4971	1.94	2.037	0.5871	28.82
20140904-PurClathDigest-1ug-02	324	6314	253.9	519	0	25.95	0.5057	1.949	2.068	0.5971	28.88
20140904-PurClathDigest-1ug-02	325	6378	256.3	525.5	0	26.27	0.5143	1.957	2.098	0.6071	28.94
20140904-PurClathDigest-1ug-02	326	6443	258.8	532	0	26.6	0.5229	1.966	2.129	0.6171	28.99
20140904-PurClathDigest-1ug-02	327	6507	261.2	538.4	0	26.92	0.5314	1.974	2.159	0.6271	29.05
20140904-PurClathDigest-1ug-02	328	6572	263.6	544.9	0	27.25	0.54	1.982	2.189	0.6371	29.1
20140904-PurClathDigest-1ug-02	329	6636	266.1	551.4	0	27.57	0.5486	1.99	2.22	0.6471	29.16
20140904-PurClathDigest-1ug-02	330	6701	268.5	557.9	0	27.89	0.5571	1.997	2.25	0.6571	29.21
20140904-PurClathDigest-1ug-02	331	6770	271	565.5	0	28.28	0.5725	2.025	2.297	0.6796	29.59
20140904-PurClathDigest-1ug-02	332	6839	273.5	573.2	0	28.66	0.5879	2.051	2.344	0.7021	29.96
20140904-PurClathDigest-1ug-02	333	6908	276	580.8	0	29.04	0.6032	2.077	2.39	0.7246	30.32
20140904-PurClathDigest-1ug-02	334	6977	278.5	588.5	0	29.42	0.6186	2.102	2.437	0.7471	30.66
20140904-PurClathDigest-1ug-02	335	7047	281	596.1	0	29.81	0.6339	2.127	2.484	0.7696	30.98
20140904-PurClathDigest-1ug-02	336	7116	283.5	603.8	0	30.19	0.6493	2.151	2.531	0.7921	31.3
20140904-PurClathDigest-1ug-02	337	7185	286	611.4	0	30.57	0.6646	2.174	2.577	0.8146	31.61
20140904-PurClathDigest-1ug-02	338	7254	288.5	619.1	0	30.95	0.68	2.197	2.624	0.8371	31.9
20140904-PurClathDigest-1ug-02	339	7323	291	626.7	0	31.34	0.6954	2.219	2.671	0.8596	32.18
20140904-PurClathDigest-1ug-02	340	7393	293.5	634.4	0	31.72	0.7107	2.241	2.718	0.8821	32.46
20140904-PurClathDigest-1ug-02	341	7462	296	642	0	32.1	0.7261	2.262	2.765	0.9046	32.72
20140904-PurClathDigest-1ug-02	342	7531	298.5	649.7	0	32.48	0.7414	2.283	2.811	0.9271	32.98
20140904-PurClathDigest-1ug-02	343	7600	301	657.3	0	32.87	0.7568	2.303	2.858	0.9496	33.23
20140904-PurClathDigest-1ug-02	344	7669	303.5	665	0	33.25	0.7721	2.322	2.905	0.9721	33.46
20140904-PurClathDigest-1ug-02	345	7739	306	672.6	0	33.63	0.7875	2.342	2.952	0.9946	33.7
20140904-PurClathDigest-1ug-02	346	7808	308.4	680.3	0	34.01	0.8029	2.36	2.999	1.017	33.92
20140904-PurClathDigest-1ug-02	347	7877	310.9	687.9	0	34.4	0.8182	2.379	3.045	1.04	34.14
20140904-PurClathDigest-1ug-02	348	7946	313.4	695.6	0	34.78	0.8336	2.397	3.092	1.062	34.35
20140904-PurClathDigest-1ug-02	349	8016	315.9	703.2	0	35.16	0.8489	2.414	3.139	1.085	34.55
20140904-PurClathDigest-1ug-02	350	8085	318.4	710.9	0	35.54	0.8643	2.432	3.186	1.107	34.75
20140904-PurClathDigest-1ug-02	351	8163	321.4	718.2	0	35.91	0.8761	2.44	3.23	1.12	34.69
20140904-PurClathDigest-1ug-02	352	8242	324.3	725.5	0	36.27	0.8879	2.448	3.274	1.134	34.62
20140904-PurClathDigest-1ug-02	353	8321	327.2	732.8	0	36.64	0.8996	2.455	3.319	1.147	34.56
20140904-PurClathDigest-1ug-02	354	8399	330.2	740.1	0	37.01	0.9114	2.463	3.363	1.16	34.49
20140904-PurClathDigest-1ug-02	355	8478	333.1	747.4	0	37.37	0.9232	2.47	3.407	1.173	34.43
20140904-PurClathDigest-1ug-02	356	8556	336	754.7	0	37.74	0.935	2.478	3.451	1.186	34.38
20140904-PurClathDigest-1ug-02	357	8635	339	762.1	0	38.1	0.9468	2.485	3.496	1.2	34.32
20140904-PurClathDigest-1ug-02	358	8714	341.9	769.4	0	38.47	0.9586	2.492	3.54	1.213	34.26
20140904-PurClathDigest-1ug-02	359	8792	344.8	776.7	0	38.83	0.9704	2.499	3.584	1.226	34.21
20140904-PurClathDigest-1ug-02	360	8871	347.8	784	0	39.2	0.9821	2.505	3.629	1.239	34.15
20140904-PurClathDigest-1ug-02	361	8949	350.7	791.3	0	39.57	0.9939	2.512	3.673	1.252	34.1
20140904-PurClathDigest-1ug-02	362	9028	353.6	798.6	0	39.93	1.006	2.519	3.717	1.266	34.05
20140904-PurClathDigest-1ug-02	363	9107	356.6	805.9	0	40.3	1.018	2.525	3.761	1.279	34
20140904-PurClathDigest-1ug-02	364	9185	359.5	813.3	0	40.66	1.029	2.531	3.806	1.292	33.95
20140904-PurClathDigest-1ug-02	365	9264	362.4	820.6	0	41.03	1.041	2.537	3.85	1.305	33.91
20140904-PurClathDigest-1ug-02	366	9342	365.4	827.9	0	41.39	1.053	2.543	3.894	1.319	33.86
20140904-PurClathDigest-1ug-02	367	9421	368.3	835.2	0	41.76	1.065	2.549	3.939	1.332	33.81
20140904-PurClathDigest-1ug-02	368	9500	371.2	842.5	0	42.13	1.076	2.555	3.983	1.345	33.77
20140904-PurClathDigest-1ug-02	369	9578	374.2	849.8	0	42.49	1.088	2.561	4.027	1.358	33.73
20140904-PurClathDigest-1ug-02	370	9657	377.1	857.1	0	42.86	1.1	2.567	4.071	1.371	33.68
20140904-PurClathDigest-1ug-02	371	9679	377.7	860.8	0	43.04	1.112	2.584	4.114	1.389	33.76
20140904-PurClathDigest-1ug-02	372	9701	378.2	864.6	0	43.23	1.124	2.601	4.156	1.406	33.84
20140904-PurClathDigest-1ug-02	373	9722	378.8	868.3	0	43.41	1.136	2.618	4.199	1.424	33.91
20140904-PurClathDigest-1ug-02	374	9744	379.4	872	0	43.6	1.149	2.634	4.241	1.441	33.98
20140904-PurClathDigest-1ug-02	375	9766	379.9	875.7	0	43.78	1.161	2.651	4.284	1.459	34.06
20140904-PurClathDigest-1ug-02	376	9788	380.5	879.4	0	43.97	1.173	2.667	4.326	1.476	34.13
20140904-PurClathDigest-1ug-02	377	9810	381	883.1	0	44.15	1.185	2.684	4.369	1.494	34.19
20140904-PurClathDigest-1ug-02	378	9832	381.6	886.8	0	44.34	1.197	2.7	4.411	1.511	34.26
20140904-PurClathDigest-1ug-02	379	9854	382.2	890.5	0	44.53	1.209	2.716	4.454	1.529	34.33
20140904-PurClathDigest-1ug-02	380	9876	382.7	894.2	0	44.71	1.221	2.732	4.496	1.546	34.39
20140904-PurClathDigest-1ug-02	381	9898	383.3	897.9	0	44.9	1.234	2.748	4.539	1.564	34.46
20140904-PurClathDigest-1ug-02	382	9920	383.8	901.6	0	45.08	1.246	2.763	4.581	1.581	34.52
20140904-PurClathDigest-1ug-02	383	9942	384.4	905.3	0	45.27	1.258	2.779	4.624	1.599	34.58
20140904-PurClathDigest-1ug-02	384	9964	385	909	0	45.45	1.27	2.794	4.666	1.616	34.64
20140904-PurClathDigest-1ug-02	385	9986	385.5	912.8	0	45.64	1.282	2.809	4.709	1.634	34.7
20140904-PurClathDigest-1ug-02	386	10010	386.1	916.5	0	45.82	1.294	2.825	4.751	1.651	34.76
20140904-PurClathDigest-1ug-02	387	10030	386.6	920.2	0	46.01	1.306	2.84	4.794	1.669	34.81
20140904-PurClathDigest-1ug-02	388	10050	387.2	923.9	0	46.19	1.319	2.854	4.836	1.686	34.87
20140904-PurClathDigest-1ug-02	389	10070	387.8	927.6	0	46.38	1.331	2.869	4.879	1.704	34.92
20140904-PurClathDigest-1ug-02	390	10100	388.3	931.3	0	46.56	1.343	2.884	4.921	1.721	34.98
20140904-PurClathDigest-1ug-02	391	10100	388	934.9	0	46.74	1.354	2.896	4.958	1.735	34.99
20140904-PurClathDigest-1ug-02	392	10100	387.6	938.4	0	46.92	1.364	2.908	4.995	1.749	35.01
20140904-PurClathDigest-1ug-02	393	10110	387.3	942	0	47.1	1.375	2.919	5.032	1.762	35.02
20140904-PurClathDigest-1ug-02	394	10110	386.9	945.6	0	47.28	1.386	2.931	5.069	1.776	35.03
20140904-PurClathDigest-1ug-02	395	10120	386.6	949.1	0	47.46	1.396	2.943	5.105	1.789	35.05
20140904-PurClathDigest-1ug-02	396	10120	386.3	952.7	0	47.64	1.407	2.954	5.142	1.803	35.06
20140904-PurClathDigest-1ug-02	397	10130	385.9	956.3	0	47.81	1.418	2.965	5.179	1.816	35.07
20140904-PurClathDigest-1ug-02	398	10130	385.6	959.9	0	47.99	1.429	2.977	5.216	1.83	35.09
20140904-PurClathDigest-1ug-02	399	10140	385.2	963.4	0	48.17	1.439	2.988	5.252	1.844	35.1
20140904-PurClathDigest-1ug-02	400	10140	384.9	967	0	48.35	1.45	2.999	5.289	1.857	35.11
20140904-PurClathDigest-1ug-02	401	10150	384.6	970.6	0	48.53	1.461	3.01	5.326	1.871	35.12
20140904-PurClathDigest-1ug-02	402	10150	384.2	974.1	0	48.71	1.471	3.021	5.363	1.884	35.14
20140904-PurClathDigest-1ug-02	403	10150	383.9	977.7	0	48.89	1.482	3.032	5.4	1.898	35.15
20140904-PurClathDigest-1ug-02	404	10160	383.5	981.3	0	49.06	1.493	3.043	5.436	1.911	35.16
20140904-PurClathDigest-1ug-02	405	10160	383.2	984.9	0	49.24	1.504	3.053	5.473	1.925	35.17
20140904-PurClathDigest-1ug-02	406	10170	382.8	988.4	0	49.42	1.514	3.064	5.51	1.939	35.18
20140904-PurClathDigest-1ug-02	407	10170	382.5	992	0	49.6	1.525	3.075	5.547	1.952	35.19
20140904-PurClathDigest-1ug-02	408	10180	382.2	995.6	0	49.78	1.536	3.085	5.584	1.966	35.21
20140904-PurClathDigest-1ug-02	409	10180	381.8	999.1	0	49.96	1.546	3.096	5.62	1.979	35.22
20140904-PurClathDigest-1ug-02	410	10190	381.5	1003	0	50.14	1.557	3.106	5.657	1.993	35.23
20140904-PurClathDigest-1ug-02	411	10190	381.2	1005	0	50.24	1.564	3.114	5.689	2.002	35.19
20140904-PurClathDigest-1ug-02	412	10190	381	1007	0	50.34	1.571	3.121	5.721	2.011	35.16
20140904-PurClathDigest-1ug-02	413	10190	380.7	1009	0	50.45	1.579	3.129	5.754	2.021	35.12
20140904-PurClathDigest-1ug-02	414	10200	380.5	1011	0	50.55	1.586	3.137	5.786	2.03	35.09
20140904-PurClathDigest-1ug-02	415	10200	380.2	1013	0	50.66	1.593	3.144	5.818	2.039	35.05
20140904-PurClathDigest-1ug-02	416	10200	379.9	1015	0	50.76	1.6	3.152	5.85	2.049	35.02
20140904-PurClathDigest-1ug-02	417	10200	379.7	1017	0	50.86	1.607	3.16	5.882	2.058	34.98
20140904-PurClathDigest-1ug-02	418	10210	379.4	1019	0	50.97	1.614	3.167	5.914	2.067	34.95
20140904-PurClathDigest-1ug-02	419	10210	379.2	1021	0	51.07	1.621	3.175	5.946	2.076	34.92
20140904-PurClathDigest-1ug-02	420	10210	378.9	1024	0	51.17	1.629	3.182	5.979	2.086	34.89
20140904-PurClathDigest-1ug-02	421	10220	378.7	1026	0	51.28	1.636	3.19	6.011	2.095	34.85
20140904-PurClathDigest-1ug-02	422	10220	378.4	1028	0	51.38	1.643	3.197	6.043	2.104	34.82
20140904-PurClathDigest-1ug-02	423	10220	378.2	1030	0	51.49	1.65	3.205	6.075	2.114	34.79
20140904-PurClathDigest-1ug-02	424	10220	377.9	1032	0	51.59	1.657	3.212	6.107	2.123	34.76
20140904-PurClathDigest-1ug-02	425	10230	377.6	1034	0	51.69	1.664	3.219	6.139	2.132	34.73
20140904-PurClathDigest-1ug-02	426	10230	377.4	1036	0	51.8	1.671	3.227	6.171	2.141	34.7
20140904-PurClathDigest-1ug-02	427	10230	377.1	1038	0	51.9	1.679	3.234	6.204	2.151	34.67
20140904-PurClathDigest-1ug-02	428	10230	376.9	1040	0	52.01	1.686	3.241	6.236	2.16	34.64
20140904-PurClathDigest-1ug-02	429	10240	376.6	1042	0	52.11	1.693	3.249	6.268	2.169	34.61
20140904-PurClathDigest-1ug-02	430	10240	376.4	1044	0	52.21	1.7	3.256	6.3	2.179	34.58
20140904-PurClathDigest-1ug-02	431	10240	376.2	1047	0	52.34	1.71	3.267	6.335	2.191	34.59
20140904-PurClathDigest-1ug-02	432	10250	375.9	1049	0	52.47	1.72	3.278	6.37	2.204	34.6
20140904-PurClathDigest-1ug-02	433	10250	375.7	1052	0	52.6	1.73	3.289	6.405	2.217	34.62
20140904-PurClathDigest-1ug-02	434	10260	375.5	1055	0	52.73	1.74	3.3	6.44	2.23	34.63
20140904-PurClathDigest-1ug-02	435	10260	375.3	1057	0	52.86	1.75	3.311	6.475	2.243	34.64
20140904-PurClathDigest-1ug-02	436	10270	375.1	1060	0	52.99	1.76	3.322	6.51	2.256	34.65
20140904-PurClathDigest-1ug-02	437	10270	374.9	1062	0	53.12	1.77	3.332	6.545	2.269	34.66
20140904-PurClathDigest-1ug-02	438	10270	374.7	1065	0	53.25	1.78	3.343	6.58	2.281	34.67
20140904-PurClathDigest-1ug-02	439	10280	374.5	1067	0	53.37	1.79	3.354	6.615	2.294	34.68
20140904-PurClathDigest-1ug-02	440	10280	374.3	1070	0	53.5	1.8	3.364	6.65	2.307	34.69
20140904-PurClathDigest-1ug-02	441	10290	374.1	1073	0	53.63	1.81	3.375	6.685	2.32	34.7
20140904-PurClathDigest-1ug-02	442	10290	373.8	1075	0	53.76	1.82	3.385	6.72	2.333	34.72
20140904-PurClathDigest-1ug-02	443	10300	373.6	1078	0	53.89	1.83	3.396	6.755	2.346	34.73
20140904-PurClathDigest-1ug-02	444	10300	373.4	1080	0	54.02	1.84	3.406	6.79	2.359	34.74
20140904-PurClathDigest-1ug-02	445	10310	373.2	1083	0	54.15	1.85	3.417	6.825	2.371	34.75
20140904-PurClathDigest-1ug-02	446	10310	373	1086	0	54.28	1.86	3.427	6.86	2.384	34.76
20140904-PurClathDigest-1ug-02	447	10310	372.8	1088	0	54.41	1.87	3.437	6.895	2.397	34.77
20140904-PurClathDigest-1ug-02	448	10320	372.6	1091	0	54.53	1.88	3.447	6.93	2.41	34.78
20140904-PurClathDigest-1ug-02	449	10320	372.4	1093	0	54.66	1.89	3.457	6.965	2.423	34.79
20140904-PurClathDigest-1ug-02	450	10330	372.2	1096	0	54.79	1.9	3.468	7	2.436	34.8
20140904-PurClathDigest-1ug-02	451	10340	372.2	1099	0	54.94	1.91	3.477	7.042	2.452	34.83
20140904-PurClathDigest-1ug-02	452	10350	372.2	1102	0	55.09	1.92	3.485	7.084	2.469	34.86
20140904-PurClathDigest-1ug-02	453	10360	372.2	1105	0	55.23	1.93	3.494	7.126	2.486	34.89
20140904-PurClathDigest-1ug-02	454	10380	372.2	1108	0	55.38	1.94	3.503	7.169	2.503	34.91
20140904-PurClathDigest-1ug-02	455	10390	372.2	1111	0	55.53	1.95	3.512	7.211	2.52	34.94
20140904-PurClathDigest-1ug-02	456	10400	372.2	1113	0	55.67	1.96	3.521	7.253	2.536	34.97
20140904-PurClathDigest-1ug-02	457	10410	372.2	1116	0	55.82	1.97	3.529	7.295	2.553	35
20140904-PurClathDigest-1ug-02	458	10420	372.2	1119	0	55.97	1.98	3.538	7.337	2.57	35.03
20140904-PurClathDigest-1ug-02	459	10430	372.2	1122	0	56.11	1.99	3.546	7.379	2.587	35.05
20140904-PurClathDigest-1ug-02	460	10450	372.2	1125	0	56.26	2	3.555	7.421	2.604	35.08
20140904-PurClathDigest-1ug-02	461	10460	372.3	1128	0	56.41	2.01	3.563	7.464	2.62	35.11
20140904-PurClathDigest-1ug-02	462	10470	372.3	1131	0	56.55	2.02	3.572	7.506	2.637	35.14
20140904-PurClathDigest-1ug-02	463	10480	372.3	1134	0	56.7	2.03	3.58	7.548	2.654	35.16
20140904-PurClathDigest-1ug-02	464	10490	372.3	1137	0	56.85	2.04	3.589	7.59	2.671	35.19
20140904-PurClathDigest-1ug-02	465	10510	372.3	1140	0	56.99	2.05	3.597	7.632	2.687	35.21
20140904-PurClathDigest-1ug-02	466	10520	372.3	1143	0	57.14	2.06	3.605	7.674	2.704	35.24
20140904-PurClathDigest-1ug-02	467	10530	372.3	1146	0	57.29	2.07	3.613	7.716	2.721	35.26
20140904-PurClathDigest-1ug-02	468	10540	372.3	1149	0	57.43	2.08	3.621	7.759	2.738	35.29
20140904-PurClathDigest-1ug-02	469	10550	372.3	1152	0	57.58	2.09	3.63	7.801	2.755	35.31
20140904-PurClathDigest-1ug-02	470	10570	372.3	1155	0	57.73	2.1	3.638	7.843	2.771	35.34
20140904-PurClathDigest-1ug-02	471	10570	372.2	1156	0	57.81	2.1	3.633	7.865	2.77	35.22
20140904-PurClathDigest-1ug-02	472	10580	372.2	1158	0	57.89	2.101	3.629	7.886	2.769	35.11
20140904-PurClathDigest-1ug-02	473	10580	372.1	1160	0	57.97	2.101	3.624	7.908	2.767	34.99
20140904-PurClathDigest-1ug-02	474	10590	372	1161	0	58.06	2.101	3.62	7.93	2.766	34.88
20140904-PurClathDigest-1ug-02	475	10590	372	1163	0	58.14	2.102	3.615	7.952	2.764	34.76
20140904-PurClathDigest-1ug-02	476	10600	371.9	1164	0	58.22	2.102	3.611	7.974	2.763	34.65
20140904-PurClathDigest-1ug-02	477	10610	371.8	1166	0	58.3	2.103	3.606	7.995	2.761	34.54
20140904-PurClathDigest-1ug-02	478	10610	371.7	1168	0	58.39	2.103	3.602	8.017	2.76	34.43
20140904-PurClathDigest-1ug-02	479	10620	371.7	1169	0	58.47	2.103	3.597	8.039	2.759	34.32
20140904-PurClathDigest-1ug-02	480	10620	371.6	1171	0	58.55	2.104	3.593	8.061	2.757	34.2
20140904-PurClathDigest-1ug-02	481	10630	371.5	1173	0	58.63	2.104	3.588	8.082	2.756	34.09
20140904-PurClathDigest-1ug-02	482	10630	371.4	1174	0	58.71	2.104	3.584	8.104	2.754	33.99
20140904-PurClathDigest-1ug-02	483	10640	371.4	1176	0	58.8	2.105	3.58	8.126	2.753	33.88
20140904-PurClathDigest-1ug-02	484	10650	371.3	1178	0	58.88	2.105	3.575	8.148	2.751	33.77
20140904-PurClathDigest-1ug-02	485	10650	371.2	1179	0	58.96	2.105	3.571	8.17	2.75	33.66
20140904-PurClathDigest-1ug-02	486	10660	371.1	1181	0	59.04	2.106	3.566	8.191	2.749	33.55
20140904-PurClathDigest-1ug-02	487	10660	371.1	1182	0	59.12	2.106	3.562	8.213	2.747	33.45
20140904-PurClathDigest-1ug-02	488	10670	371	1184	0	59.21	2.106	3.558	8.235	2.746	33.34
20140904-PurClathDigest-1ug-02	489	10670	370.9	1186	0	59.29	2.107	3.553	8.257	2.744	33.24
20140904-PurClathDigest-1ug-02	490	10680	370.9	1187	0	59.37	2.107	3.549	8.279	2.743	33.13
20140904-PurClathDigest-1ug-02	491	10690	370.7	1190	0	59.5	2.113	3.552	8.307	2.757	33.19
20140904-PurClathDigest-1ug-02	492	10690	370.6	1193	0	59.63	2.119	3.554	8.335	2.771	33.25
20140904-PurClathDigest-1ug-02	493	10700	370.5	1195	0	59.75	2.125	3.557	8.363	2.786	33.31
20140904-PurClathDigest-1ug-02	494	10700	370.4	1198	0	59.88	2.131	3.559	8.391	2.8	33.37
20140904-PurClathDigest-1ug-02	495	10710	370.3	1200	0	60.01	2.138	3.562	8.42	2.814	33.43
20140904-PurClathDigest-1ug-02	496	10720	370.2	1203	0	60.14	2.144	3.565	8.448	2.829	33.48
20140904-PurClathDigest-1ug-02	497	10720	370.1	1205	0	60.26	2.15	3.567	8.476	2.843	33.54
20140904-PurClathDigest-1ug-02	498	10730	370	1208	0	60.39	2.156	3.57	8.504	2.857	33.6
20140904-PurClathDigest-1ug-02	499	10740	369.8	1210	0	60.52	2.162	3.572	8.532	2.871	33.65
20140904-PurClathDigest-1ug-02	500	10740	369.7	1213	0	60.65	2.168	3.575	8.561	2.886	33.71
20140904-PurClathDigest-1ug-02	501	10750	369.6	1215	0	60.77	2.174	3.577	8.589	2.9	33.76
20140904-PurClathDigest-1ug-02	502	10750	369.5	1218	0	60.9	2.18	3.58	8.617	2.914	33.82
20140904-PurClathDigest-1ug-02	503	10760	369.4	1221	0	61.03	2.186	3.582	8.645	2.929	33.87
20140904-PurClathDigest-1ug-02	504	10770	369.3	1223	0	61.16	2.192	3.584	8.674	2.943	33.93
20140904-PurClathDigest-1ug-02	505	10770	369.2	1226	0	61.28	2.198	3.587	8.702	2.957	33.98
20140904-PurClathDigest-1ug-02	506	10780	369.1	1228	0	61.41	2.204	3.589	8.73	2.971	34.04
20140904-PurClathDigest-1ug-02	507	10790	369	1231	0	61.54	2.21	3.592	8.758	2.986	34.09
20140904-PurClathDigest-1ug-02	508	10790	368.8	1233	0	61.67	2.216	3.594	8.786	3	34.14
20140904-PurClathDigest-1ug-02	509	10800	368.7	1236	0	61.79	2.222	3.597	8.815	3.014	34.2
20140904-PurClathDigest-1ug-02	510	10800	368.6	1238	0	61.92	2.229	3.599	8.843	3.029	34.25
20140904-PurClathDigest-1ug-02	511	10810	368.3	1241	0	62.03	2.232	3.599	8.867	3.033	34.21
20140904-PurClathDigest-1ug-02	512	10810	367.9	1243	0	62.14	2.236	3.599	8.892	3.038	34.16
20140904-PurClathDigest-1ug-02	513	10810	367.5	1245	0	62.25	2.24	3.599	8.917	3.042	34.12
20140904-PurClathDigest-1ug-02	514	10810	367.2	1247	0	62.36	2.244	3.599	8.941	3.047	34.08
20140904-PurClathDigest-1ug-02	515	10820	366.8	1249	0	62.47	2.248	3.599	8.966	3.052	34.04
20140904-PurClathDigest-1ug-02	516	10820	366.4	1252	0	62.58	2.252	3.599	8.991	3.056	34
20140904-PurClathDigest-1ug-02	517	10820	366.1	1254	0	62.69	2.256	3.599	9.015	3.061	33.95
20140904-PurClathDigest-1ug-02	518	10820	365.7	1256	0	62.8	2.26	3.599	9.04	3.066	33.91
20140904-PurClathDigest-1ug-02	519	10820	365.4	1258	0	62.9	2.264	3.599	9.065	3.07	33.87
20140904-PurClathDigest-1ug-02	520	10830	365	1260	0	63.01	2.268	3.599	9.089	3.075	33.83
20140904-PurClathDigest-1ug-02	521	10830	364.6	1262	0	63.12	2.272	3.599	9.114	3.08	33.79
20140904-PurClathDigest-1ug-02	522	10830	364.3	1265	0	63.23	2.276	3.599	9.139	3.084	33.75
20140904-PurClathDigest-1ug-02	523	10830	363.9	1267	0	63.34	2.28	3.599	9.163	3.089	33.71
20140904-PurClathDigest-1ug-02	524	10830	363.5	1269	0	63.45	2.284	3.599	9.188	3.094	33.67
20140904-PurClathDigest-1ug-02	525	10840	363.2	1271	0	63.56	2.287	3.599	9.212	3.098	33.63
20140904-PurClathDigest-1ug-02	526	10840	362.8	1273	0	63.67	2.291	3.599	9.237	3.103	33.59
20140904-PurClathDigest-1ug-02	527	10840	362.5	1276	0	63.78	2.295	3.599	9.262	3.107	33.55
20140904-PurClathDigest-1ug-02	528	10840	362.1	1278	0	63.89	2.299	3.599	9.286	3.112	33.51
20140904-PurClathDigest-1ug-02	529	10850	361.7	1280	0	64	2.303	3.599	9.311	3.117	33.47
20140904-PurClathDigest-1ug-02	530	10850	361.4	1282	0	64.11	2.307	3.599	9.336	3.121	33.44
20140904-PurClathDigest-1ug-02	531	10840	361	1283	0	64.14	2.306	3.596	9.337	3.124	33.46
20140904-PurClathDigest-1ug-02	532	10840	360.5	1283	0	64.17	2.305	3.592	9.338	3.126	33.48
20140904-PurClathDigest-1ug-02	533	10830	360.1	1284	0	64.2	2.304	3.589	9.339	3.129	33.5
20140904-PurClathDigest-1ug-02	534	10830	359.7	1285	0	64.23	2.303	3.585	9.34	3.131	33.53
20140904-PurClathDigest-1ug-02	535	10830	359.3	1285	0	64.26	2.302	3.582	9.341	3.134	33.55
20140904-PurClathDigest-1ug-02	536	10820	358.9	1286	0	64.29	2.301	3.579	9.342	3.136	33.57
20140904-PurClathDigest-1ug-02	537	10820	358.5	1286	0	64.32	2.3	3.575	9.343	3.139	33.6
20140904-PurClathDigest-1ug-02	538	10810	358.1	1287	0	64.35	2.299	3.572	9.344	3.141	33.62
20140904-PurClathDigest-1ug-02	539	10810	357.6	1288	0	64.38	2.298	3.569	9.345	3.144	33.64
20140904-PurClathDigest-1ug-02	540	10800	357.2	1288	0	64.41	2.296	3.565	9.346	3.146	33.66
20140904-PurClathDigest-1ug-02	541	10800	356.8	1289	0	64.44	2.295	3.562	9.348	3.149	33.69
20140904-PurClathDigest-1ug-02	542	10790	356.4	1289	0	64.47	2.294	3.559	9.349	3.151	33.71
20140904-PurClathDigest-1ug-02	543	10790	356	1290	0	64.5	2.293	3.555	9.35	3.154	33.73
20140904-PurClathDigest-1ug-02	544	10790	355.6	1291	0	64.53	2.292	3.552	9.351	3.156	33.76
20140904-PurClathDigest-1ug-02	545	10780	355.2	1291	0	64.56	2.291	3.549	9.352	3.159	33.78
20140904-PurClathDigest-1ug-02	546	10780	354.7	1292	0	64.59	2.29	3.545	9.353	3.161	33.8
20140904-PurClathDigest-1ug-02	547	10770	354.3	1292	0	64.62	2.289	3.542	9.354	3.164	33.82
20140904-PurClathDigest-1ug-02	548	10770	353.9	1293	0	64.65	2.288	3.539	9.355	3.166	33.85
20140904-PurClathDigest-1ug-02	549	10760	353.5	1294	0	64.68	2.287	3.535	9.356	3.169	33.87
20140904-PurClathDigest-1ug-02	550	10760	353.1	1294	0	64.71	2.286	3.532	9.357	3.171	33.89
20140904-PurClathDigest-1ug-02	551	10750	352.8	1294	0	64.68	2.285	3.532	9.356	3.169	33.87
20140904-PurClathDigest-1ug-02	552	10750	352.5	1293	0	64.64	2.284	3.533	9.355	3.167	33.86
20140904-PurClathDigest-1ug-02	553	10740	352.3	1292	0	64.61	2.282	3.533	9.354	3.165	33.84
20140904-PurClathDigest-1ug-02	554	10740	352	1291	0	64.57	2.281	3.533	9.353	3.163	33.82
20140904-PurClathDigest-1ug-02	555	10730	351.7	1291	0	64.54	2.28	3.533	9.352	3.161	33.8
20140904-PurClathDigest-1ug-02	556	10730	351.4	1290	0	64.5	2.279	3.534	9.351	3.159	33.78
20140904-PurClathDigest-1ug-02	557	10720	351.2	1289	0	64.47	2.278	3.534	9.35	3.156	33.76
20140904-PurClathDigest-1ug-02	558	10720	350.9	1289	0	64.43	2.277	3.534	9.349	3.154	33.74
20140904-PurClathDigest-1ug-02	559	10710	350.6	1288	0	64.4	2.276	3.534	9.348	3.152	33.72
20140904-PurClathDigest-1ug-02	560	10710	350.3	1287	0	64.36	2.275	3.535	9.346	3.15	33.7
20140904-PurClathDigest-1ug-02	561	10700	350	1287	0	64.33	2.274	3.535	9.345	3.148	33.68
20140904-PurClathDigest-1ug-02	562	10700	349.8	1286	0	64.29	2.273	3.535	9.344	3.146	33.66
20140904-PurClathDigest-1ug-02	563	10690	349.5	1285	0	64.26	2.272	3.535	9.343	3.144	33.65
20140904-PurClathDigest-1ug-02	564	10690	349.2	1284	0	64.22	2.271	3.536	9.342	3.141	33.63
20140904-PurClathDigest-1ug-02	565	10680	348.9	1284	0	64.19	2.27	3.536	9.341	3.139	33.61
20140904-PurClathDigest-1ug-02	566	10680	348.7	1283	0	64.15	2.269	3.536	9.34	3.137	33.59
20140904-PurClathDigest-1ug-02	567	10670	348.4	1282	0	64.12	2.267	3.536	9.339	3.135	33.57
20140904-PurClathDigest-1ug-02	568	10670	348.1	1282	0	64.08	2.266	3.537	9.338	3.133	33.55
20140904-PurClathDigest-1ug-02	569	10660	347.8	1281	0	64.05	2.265	3.537	9.337	3.131	33.53
20140904-PurClathDigest-1ug-02	570	10660	347.6	1280	0	64.01	2.264	3.537	9.336	3.129	33.51
20140904-PurClathDigest-1ug-02	571	10670	347.9	1281	0	64.03	2.261	3.531	9.336	3.129	33.52
20140904-PurClathDigest-1ug-02	572	10680	348.3	1281	0	64.05	2.258	3.525	9.337	3.13	33.52
20140904-PurClathDigest-1ug-02	573	10690	348.7	1282	0	64.08	2.255	3.519	9.338	3.131	33.53
20140904-PurClathDigest-1ug-02	574	10700	349.1	1282	0	64.1	2.251	3.513	9.339	3.131	33.53
20140904-PurClathDigest-1ug-02	575	10710	349.5	1282	0	64.12	2.248	3.506	9.339	3.132	33.54
20140904-PurClathDigest-1ug-02	576	10720	349.8	1283	0	64.14	2.245	3.5	9.34	3.133	33.54
20140904-PurClathDigest-1ug-02	577	10730	350.2	1283	0	64.16	2.242	3.494	9.341	3.134	33.55
20140904-PurClathDigest-1ug-02	578	10740	350.6	1284	0	64.18	2.239	3.488	9.341	3.134	33.55
20140904-PurClathDigest-1ug-02	579	10750	351	1284	0	64.2	2.235	3.482	9.342	3.135	33.56
20140904-PurClathDigest-1ug-02	580	10760	351.3	1284	0	64.22	2.232	3.476	9.343	3.136	33.56
20140904-PurClathDigest-1ug-02	581	10770	351.7	1285	0	64.24	2.229	3.47	9.344	3.136	33.57
20140904-PurClathDigest-1ug-02	582	10780	352.1	1285	0	64.26	2.226	3.464	9.344	3.137	33.57
20140904-PurClathDigest-1ug-02	583	10800	352.5	1286	0	64.28	2.222	3.458	9.345	3.138	33.58
20140904-PurClathDigest-1ug-02	584	10810	352.9	1286	0	64.3	2.219	3.451	9.346	3.139	33.58
20140904-PurClathDigest-1ug-02	585	10820	353.2	1286	0	64.32	2.216	3.445	9.346	3.139	33.59
20140904-PurClathDigest-1ug-02	586	10830	353.6	1287	0	64.34	2.213	3.439	9.347	3.14	33.59
20140904-PurClathDigest-1ug-02	587	10840	354	1287	0	64.36	2.21	3.433	9.348	3.141	33.6
20140904-PurClathDigest-1ug-02	588	10850	354.4	1288	0	64.38	2.206	3.427	9.349	3.141	33.6
20140904-PurClathDigest-1ug-02	589	10860	354.7	1288	0	64.4	2.203	3.421	9.349	3.142	33.61
20140904-PurClathDigest-1ug-02	590	10870	355.1	1288	0	64.42	2.2	3.415	9.35	3.143	33.61
20140904-PurClathDigest-1ug-02	591	10870	355.3	1287	0	64.37	2.198	3.415	9.335	3.139	33.63
20140904-PurClathDigest-1ug-02	592	10870	355.4	1287	0	64.33	2.196	3.414	9.319	3.135	33.64
20140904-PurClathDigest-1ug-02	593	10870	355.6	1286	0	64.28	2.195	3.414	9.304	3.131	33.65
20140904-PurClathDigest-1ug-02	594	10870	355.7	1285	0	64.23	2.193	3.414	9.289	3.127	33.67
20140904-PurClathDigest-1ug-02	595	10870	355.9	1284	0	64.19	2.191	3.414	9.273	3.123	33.68
20140904-PurClathDigest-1ug-02	596	10880	356	1283	0	64.14	2.189	3.413	9.258	3.119	33.69
20140904-PurClathDigest-1ug-02	597	10880	356.2	1282	0	64.09	2.188	3.413	9.242	3.115	33.71
20140904-PurClathDigest-1ug-02	598	10880	356.3	1281	0	64.04	2.186	3.413	9.227	3.111	33.72
20140904-PurClathDigest-1ug-02	599	10880	356.5	1280	0	64	2.184	3.413	9.212	3.107	33.73
20140904-PurClathDigest-1ug-02	600	10880	356.6	1279	0	63.95	2.182	3.412	9.196	3.104	33.75
20140904-PurClathDigest-1ug-02	601	10880	356.8	1278	0	63.9	2.18	3.412	9.181	3.1	33.76
20140904-PurClathDigest-1ug-02	602	10880	356.9	1277	0	63.86	2.179	3.412	9.166	3.096	33.77
20140904-PurClathDigest-1ug-02	603	10880	357.1	1276	0	63.81	2.177	3.411	9.15	3.092	33.79
20140904-PurClathDigest-1ug-02	604	10880	357.2	1275	0	63.76	2.175	3.411	9.135	3.088	33.8
20140904-PurClathDigest-1ug-02	605	10890	357.4	1274	0	63.71	2.173	3.411	9.12	3.084	33.82
20140904-PurClathDigest-1ug-02	606	10890	357.5	1273	0	63.67	2.171	3.411	9.104	3.08	33.83
20140904-PurClathDigest-1ug-02	607	10890	357.7	1272	0	63.62	2.17	3.41	9.089	3.076	33.84
20140904-PurClathDigest-1ug-02	608	10890	357.8	1271	0	63.57	2.168	3.41	9.074	3.072	33.86
20140904-PurClathDigest-1ug-02	609	10890	358	1271	0	63.53	2.166	3.41	9.058	3.068	33.87
20140904-PurClathDigest-1ug-02	610	10890	358.1	1270	0	63.48	2.164	3.409	9.043	3.064	33.89
20140904-PurClathDigest-1ug-02	611	10890	358.2	1268	0	63.42	2.159	3.405	9.03	3.057	33.85
20140904-PurClathDigest-1ug-02	612	10890	358.3	1267	0	63.35	2.154	3.4	9.018	3.05	33.82
20140904-PurClathDigest-1ug-02	613	10890	358.5	1266	0	63.29	2.149	3.396	9.005	3.043	33.79
20140904-PurClathDigest-1ug-02	614	10890	358.6	1265	0	63.23	2.144	3.391	8.993	3.036	33.76
20140904-PurClathDigest-1ug-02	615	10900	358.7	1263	0	63.17	2.139	3.387	8.98	3.029	33.72
20140904-PurClathDigest-1ug-02	616	10900	358.8	1262	0	63.1	2.134	3.382	8.968	3.021	33.69
20140904-PurClathDigest-1ug-02	617	10900	358.9	1261	0	63.04	2.129	3.378	8.955	3.014	33.66
20140904-PurClathDigest-1ug-02	618	10900	359	1260	0	62.98	2.124	3.373	8.943	3.007	33.63
20140904-PurClathDigest-1ug-02	619	10900	359.1	1258	0	62.92	2.119	3.368	8.93	3	33.59
20140904-PurClathDigest-1ug-02	620	10900	359.2	1257	0	62.85	2.114	3.364	8.918	2.993	33.56
20140904-PurClathDigest-1ug-02	621	10900	359.3	1256	0	62.79	2.109	3.359	8.905	2.986	33.53
20140904-PurClathDigest-1ug-02	622	10900	359.5	1255	0	62.73	2.104	3.355	8.893	2.979	33.49
20140904-PurClathDigest-1ug-02	623	10900	359.6	1253	0	62.67	2.099	3.35	8.88	2.971	33.46
20140904-PurClathDigest-1ug-02	624	10900	359.7	1252	0	62.6	2.094	3.345	8.868	2.964	33.43
20140904-PurClathDigest-1ug-02	625	10910	359.8	1251	0	62.54	2.089	3.341	8.855	2.957	33.39
20140904-PurClathDigest-1ug-02	626	10910	359.9	1250	0	62.48	2.084	3.336	8.843	2.95	33.36
20140904-PurClathDigest-1ug-02	627	10910	360	1248	0	62.42	2.079	3.331	8.83	2.943	33.33
20140904-PurClathDigest-1ug-02	628	10910	360.1	1247	0	62.35	2.074	3.327	8.818	2.936	33.29
20140904-PurClathDigest-1ug-02	629	10910	360.2	1246	0	62.29	2.069	3.322	8.805	2.929	33.26
20140904-PurClathDigest-1ug-02	630	10910	360.4	1245	0	62.23	2.064	3.317	8.793	2.921	33.23
20140904-PurClathDigest-1ug-02	631	10890	359.8	1242	0	62.09	2.063	3.322	8.776	2.915	33.22
20140904-PurClathDigest-1ug-02	632	10880	359.3	1239	0	61.95	2.061	3.328	8.759	2.909	33.22
20140904-PurClathDigest-1ug-02	633	10860	358.7	1236	0	61.81	2.06	3.333	8.741	2.903	33.21
20140904-PurClathDigest-1ug-02	634	10840	358.2	1233	0	61.67	2.059	3.338	8.724	2.897	33.21
20140904-PurClathDigest-1ug-02	635	10830	357.7	1230	0	61.52	2.057	3.344	8.707	2.891	33.2
20140904-PurClathDigest-1ug-02	636	10810	357.1	1228	0	61.38	2.056	3.349	8.69	2.885	33.2
20140904-PurClathDigest-1ug-02	637	10790	356.6	1225	0	61.24	2.054	3.354	8.673	2.879	33.19
20140904-PurClathDigest-1ug-02	638	10780	356	1222	0	61.1	2.053	3.36	8.656	2.873	33.19
20140904-PurClathDigest-1ug-02	639	10760	355.5	1219	0	60.96	2.051	3.365	8.639	2.867	33.19
20140904-PurClathDigest-1ug-02	640	10740	355	1216	0	60.82	2.05	3.371	8.621	2.861	33.18
20140904-PurClathDigest-1ug-02	641	10720	354.4	1214	0	60.68	2.049	3.376	8.604	2.855	33.18
20140904-PurClathDigest-1ug-02	642	10710	353.9	1211	0	60.54	2.047	3.381	8.587	2.849	33.17
20140904-PurClathDigest-1ug-02	643	10690	353.4	1208	0	60.4	2.046	3.387	8.57	2.842	33.17
20140904-PurClathDigest-1ug-02	644	10670	352.8	1205	0	60.26	2.044	3.393	8.553	2.836	33.16
20140904-PurClathDigest-1ug-02	645	10660	352.3	1202	0	60.12	2.043	3.398	8.536	2.83	33.16
20140904-PurClathDigest-1ug-02	646	10640	351.7	1200	0	59.98	2.041	3.404	8.519	2.824	33.15
20140904-PurClathDigest-1ug-02	647	10620	351.2	1197	0	59.84	2.04	3.409	8.501	2.818	33.15
20140904-PurClathDigest-1ug-02	648	10610	350.7	1194	0	59.7	2.039	3.415	8.484	2.812	33.15
20140904-PurClathDigest-1ug-02	649	10590	350.1	1191	0	59.55	2.037	3.421	8.467	2.806	33.14
20140904-PurClathDigest-1ug-02	650	10570	349.6	1188	0	59.41	2.036	3.426	8.45	2.8	33.14
20140904-PurClathDigest-1ug-02	651	10570	349.5	1187	0	59.34	2.028	3.418	8.428	2.793	33.14
20140904-PurClathDigest-1ug-02	652	10560	349.4	1185	0	59.26	2.021	3.41	8.406	2.786	33.14
20140904-PurClathDigest-1ug-02	653	10550	349.3	1184	0	59.18	2.013	3.402	8.385	2.779	33.14
20140904-PurClathDigest-1ug-02	654	10550	349.2	1182	0	59.11	2.006	3.393	8.363	2.771	33.14
20140904-PurClathDigest-1ug-02	655	10540	349	1181	0	59.03	1.998	3.385	8.341	2.764	33.14
20140904-PurClathDigest-1ug-02	656	10530	348.9	1179	0	58.95	1.991	3.377	8.319	2.757	33.14
20140904-PurClathDigest-1ug-02	657	10530	348.8	1177	0	58.87	1.983	3.369	8.297	2.75	33.14
20140904-PurClathDigest-1ug-02	658	10520	348.7	1176	0	58.8	1.976	3.36	8.276	2.743	33.14
20140904-PurClathDigest-1ug-02	659	10520	348.6	1174	0	58.72	1.968	3.352	8.254	2.736	33.14
20140904-PurClathDigest-1ug-02	660	10510	348.5	1173	0	58.64	1.961	3.343	8.232	2.729	33.15
20140904-PurClathDigest-1ug-02	661	10500	348.4	1171	0	58.57	1.953	3.335	8.21	2.721	33.15
20140904-PurClathDigest-1ug-02	662	10500	348.3	1170	0	58.49	1.946	3.327	8.189	2.714	33.15
20140904-PurClathDigest-1ug-02	663	10490	348.2	1168	0	58.41	1.938	3.318	8.167	2.707	33.15
20140904-PurClathDigest-1ug-02	664	10480	348.1	1167	0	58.33	1.931	3.31	8.145	2.7	33.15
20140904-PurClathDigest-1ug-02	665	10480	348	1165	0	58.26	1.923	3.301	8.123	2.693	33.15
20140904-PurClathDigest-1ug-02	666	10470	347.9	1164	0	58.18	1.916	3.293	8.101	2.686	33.15
20140904-PurClathDigest-1ug-02	667	10460	347.8	1162	0	58.1	1.908	3.284	8.08	2.679	33.15
20140904-PurClathDigest-1ug-02	668	10460	347.7	1161	0	58.03	1.901	3.276	8.058	2.671	33.15
20140904-PurClathDigest-1ug-02	669	10450	347.5	1159	0	57.95	1.893	3.267	8.036	2.664	33.15
20140904-PurClathDigest-1ug-02	670	10450	347.4	1157	0	57.87	1.886	3.258	8.014	2.657	33.16
20140904-PurClathDigest-1ug-02	671	10450	347.7	1157	0	57.83	1.884	3.258	8.007	2.654	33.14
20140904-PurClathDigest-1ug-02	672	10450	347.9	1156	0	57.78	1.882	3.257	8	2.651	33.13
20140904-PurClathDigest-1ug-02	673	10450	348.1	1155	0	57.74	1.88	3.257	7.993	2.647	33.12
20140904-PurClathDigest-1ug-02	674	10460	348.4	1154	0	57.69	1.879	3.256	7.986	2.644	33.11
20140904-PurClathDigest-1ug-02	675	10460	348.6	1153	0	57.64	1.877	3.256	7.979	2.641	33.1
20140904-PurClathDigest-1ug-02	676	10460	348.8	1152	0	57.6	1.875	3.255	7.971	2.638	33.09
20140904-PurClathDigest-1ug-02	677	10460	349.1	1151	0	57.55	1.873	3.255	7.964	2.635	33.08
20140904-PurClathDigest-1ug-02	678	10470	349.3	1150	0	57.51	1.871	3.254	7.957	2.631	33.07
20140904-PurClathDigest-1ug-02	679	10470	349.6	1149	0	57.46	1.87	3.254	7.95	2.628	33.06
20140904-PurClathDigest-1ug-02	680	10470	349.8	1148	0	57.42	1.868	3.253	7.943	2.625	33.05
20140904-PurClathDigest-1ug-02	681	10470	350	1147	0	57.37	1.866	3.253	7.936	2.622	33.04
20140904-PurClathDigest-1ug-02	682	10480	350.3	1147	0	57.33	1.864	3.252	7.929	2.619	33.03
20140904-PurClathDigest-1ug-02	683	10480	350.5	1146	0	57.28	1.863	3.251	7.921	2.615	33.02
20140904-PurClathDigest-1ug-02	684	10480	350.7	1145	0	57.24	1.861	3.251	7.914	2.612	33.01
20140904-PurClathDigest-1ug-02	685	10490	351	1144	0	57.19	1.859	3.25	7.907	2.609	32.99
20140904-PurClathDigest-1ug-02	686	10490	351.2	1143	0	57.15	1.857	3.25	7.9	2.606	32.98
20140904-PurClathDigest-1ug-02	687	10490	351.4	1142	0	57.1	1.855	3.249	7.893	2.602	32.97
20140904-PurClathDigest-1ug-02	688	10490	351.7	1141	0	57.05	1.854	3.249	7.886	2.599	32.96
20140904-PurClathDigest-1ug-02	689	10500	351.9	1140	0	57.01	1.852	3.248	7.879	2.596	32.95
20140904-PurClathDigest-1ug-02	690	10500	352.1	1139	0	56.96	1.85	3.248	7.871	2.593	32.94
20140904-PurClathDigest-1ug-02	691	10500	352.4	1138	0	56.91	1.851	3.253	7.866	2.596	33
20140904-PurClathDigest-1ug-02	692	10510	352.8	1137	0	56.85	1.852	3.258	7.861	2.599	33.07
20140904-PurClathDigest-1ug-02	693	10510	353.1	1136	0	56.79	1.853	3.263	7.855	2.602	33.13
20140904-PurClathDigest-1ug-02	694	10520	353.4	1135	0	56.74	1.854	3.268	7.85	2.606	33.19
20140904-PurClathDigest-1ug-02	695	10520	353.7	1134	0	56.68	1.855	3.273	7.845	2.609	33.26
20140904-PurClathDigest-1ug-02	696	10530	354	1132	0	56.62	1.856	3.279	7.839	2.612	33.32
20140904-PurClathDigest-1ug-02	697	10530	354.4	1131	0	56.57	1.858	3.284	7.834	2.615	33.39
20140904-PurClathDigest-1ug-02	698	10540	354.7	1130	0	56.51	1.859	3.289	7.829	2.619	33.45
20140904-PurClathDigest-1ug-02	699	10540	355	1129	0	56.45	1.86	3.294	7.823	2.622	33.51
20140904-PurClathDigest-1ug-02	700	10550	355.3	1128	0	56.4	1.861	3.299	7.818	2.625	33.58
20140904-PurClathDigest-1ug-02	701	10550	355.6	1127	0	56.34	1.862	3.305	7.812	2.628	33.64
20140904-PurClathDigest-1ug-02	702	10560	356	1126	0	56.28	1.863	3.31	7.807	2.631	33.71
20140904-PurClathDigest-1ug-02	703	10560	356.3	1125	0	56.23	1.864	3.315	7.802	2.635	33.77
20140904-PurClathDigest-1ug-02	704	10570	356.6	1123	0	56.17	1.865	3.32	7.796	2.638	33.83
20140904-PurClathDigest-1ug-02	705	10570	356.9	1122	0	56.11	1.866	3.326	7.791	2.641	33.9
20140904-PurClathDigest-1ug-02	706	10580	357.2	1121	0	56.06	1.867	3.331	7.786	2.644	33.96
20140904-PurClathDigest-1ug-02	707	10580	357.6	1120	0	56	1.868	3.336	7.78	2.647	34.03
20140904-PurClathDigest-1ug-02	708	10580	357.9	1119	0	55.94	1.869	3.341	7.775	2.651	34.09
20140904-PurClathDigest-1ug-02	709	10590	358.2	1118	0	55.89	1.87	3.347	7.77	2.654	34.16
20140904-PurClathDigest-1ug-02	710	10590	358.5	1117	0	55.83	1.871	3.352	7.764	2.657	34.22
20140904-PurClathDigest-1ug-02	711	10600	358.8	1115	0	55.75	1.873	3.359	7.776	2.662	34.23
20140904-PurClathDigest-1ug-02	712	10600	359.2	1114	0	55.67	1.874	3.365	7.789	2.667	34.24
20140904-PurClathDigest-1ug-02	713	10610	359.5	1112	0	55.6	1.875	3.372	7.801	2.672	34.26
20140904-PurClathDigest-1ug-02	714	10610	359.8	1110	0	55.52	1.876	3.378	7.813	2.677	34.27
20140904-PurClathDigest-1ug-02	715	10620	360.1	1109	0	55.44	1.877	3.385	7.825	2.682	34.28
20140904-PurClathDigest-1ug-02	716	10620	360.5	1107	0	55.37	1.878	3.392	7.837	2.687	34.29
20140904-PurClathDigest-1ug-02	717	10620	360.8	1106	0	55.29	1.879	3.398	7.849	2.692	34.3
20140904-PurClathDigest-1ug-02	718	10630	361.1	1104	0	55.21	1.88	3.405	7.861	2.697	34.31
20140904-PurClathDigest-1ug-02	719	10630	361.4	1103	0	55.14	1.881	3.412	7.874	2.702	34.32
20140904-PurClathDigest-1ug-02	720	10640	361.8	1101	0	55.06	1.882	3.418	7.886	2.707	34.33
20140904-PurClathDigest-1ug-02	721	10640	362.1	1100	0	54.98	1.883	3.425	7.898	2.712	34.34
20140904-PurClathDigest-1ug-02	722	10640	362.4	1098	0	54.91	1.884	3.432	7.91	2.717	34.35
20140904-PurClathDigest-1ug-02	723	10650	362.7	1097	0	54.83	1.885	3.439	7.922	2.722	34.36
20140904-PurClathDigest-1ug-02	724	10650	363.1	1095	0	54.75	1.886	3.445	7.934	2.727	34.37
20140904-PurClathDigest-1ug-02	725	10660	363.4	1094	0	54.68	1.888	3.452	7.946	2.732	34.38
20140904-PurClathDigest-1ug-02	726	10660	363.7	1092	0	54.6	1.889	3.459	7.959	2.737	34.39
20140904-PurClathDigest-1ug-02	727	10670	364	1090	0	54.52	1.89	3.466	7.971	2.742	34.4
20140904-PurClathDigest-1ug-02	728	10670	364.4	1089	0	54.45	1.891	3.473	7.983	2.747	34.41
20140904-PurClathDigest-1ug-02	729	10670	364.7	1087	0	54.37	1.892	3.479	7.995	2.752	34.42
20140904-PurClathDigest-1ug-02	730	10680	365	1086	0	54.29	1.893	3.486	8.007	2.757	34.43
20140904-PurClathDigest-1ug-02	731	10690	365.7	1085	0	54.23	1.885	3.476	7.998	2.747	34.35
20140904-PurClathDigest-1ug-02	732	10700	366.3	1084	0	54.18	1.877	3.465	7.989	2.738	34.27
20140904-PurClathDigest-1ug-02	733	10710	367	1082	0	54.12	1.869	3.454	7.98	2.728	34.19
20140904-PurClathDigest-1ug-02	734	10720	367.6	1081	0	54.06	1.861	3.443	7.971	2.719	34.1
20140904-PurClathDigest-1ug-02	735	10730	368.3	1080	0	54	1.854	3.433	7.962	2.709	34.02
20140904-PurClathDigest-1ug-02	736	10740	368.9	1079	0	53.94	1.846	3.422	7.954	2.699	33.94
20140904-PurClathDigest-1ug-02	737	10760	369.6	1078	0	53.88	1.838	3.411	7.945	2.69	33.85
20140904-PurClathDigest-1ug-02	738	10770	370.2	1076	0	53.82	1.83	3.4	7.936	2.68	33.77
20140904-PurClathDigest-1ug-02	739	10780	370.8	1075	0	53.77	1.822	3.389	7.927	2.67	33.69
20140904-PurClathDigest-1ug-02	740	10790	371.5	1074	0	53.71	1.814	3.378	7.918	2.661	33.6
20140904-PurClathDigest-1ug-02	741	10800	372.1	1073	0	53.65	1.806	3.367	7.909	2.651	33.52
20140904-PurClathDigest-1ug-02	742	10810	372.8	1072	0	53.59	1.799	3.356	7.9	2.641	33.44
20140904-PurClathDigest-1ug-02	743	10820	373.4	1071	0	53.53	1.791	3.345	7.891	2.632	33.35
20140904-PurClathDigest-1ug-02	744	10830	374.1	1069	0	53.47	1.783	3.334	7.882	2.622	33.27
20140904-PurClathDigest-1ug-02	745	10840	374.7	1068	0	53.41	1.775	3.323	7.873	2.612	33.18
20140904-PurClathDigest-1ug-02	746	10860	375.4	1067	0	53.36	1.767	3.312	7.864	2.603	33.1
20140904-PurClathDigest-1ug-02	747	10870	376	1066	0	53.3	1.759	3.301	7.855	2.593	33.01
20140904-PurClathDigest-1ug-02	748	10880	376.7	1065	0	53.24	1.751	3.29	7.846	2.584	32.93
20140904-PurClathDigest-1ug-02	749	10890	377.3	1064	0	53.18	1.744	3.279	7.837	2.574	32.84
20140904-PurClathDigest-1ug-02	750	10900	378	1062	0	53.12	1.736	3.267	7.829	2.564	32.76
20140904-PurClathDigest-1ug-02	751	10910	378.6	1060	0	53.02	1.733	3.267	7.823	2.56	32.73
20140904-PurClathDigest-1ug-02	752	10920	379.2	1059	0	52.93	1.729	3.267	7.818	2.556	32.7
20140904-PurClathDigest-1ug-02	753	10920	379.9	1057	0	52.83	1.726	3.267	7.812	2.552	32.67
20140904-PurClathDigest-1ug-02	754	10930	380.5	1055	0	52.73	1.723	3.267	7.807	2.549	32.64
20140904-PurClathDigest-1ug-02	755	10940	381.2	1053	0	52.64	1.72	3.267	7.802	2.545	32.62
20140904-PurClathDigest-1ug-02	756	10950	381.8	1051	0	52.54	1.716	3.267	7.796	2.541	32.59
20140904-PurClathDigest-1ug-02	757	10950	382.4	1049	0	52.44	1.713	3.267	7.791	2.537	32.56
20140904-PurClathDigest-1ug-02	758	10960	383.1	1047	0	52.34	1.71	3.267	7.786	2.533	32.53
20140904-PurClathDigest-1ug-02	759	10970	383.7	1045	0	52.25	1.707	3.267	7.78	2.529	32.5
20140904-PurClathDigest-1ug-02	760	10980	384.4	1043	0	52.15	1.704	3.267	7.775	2.525	32.48
20140904-PurClathDigest-1ug-02	761	10980	385	1041	0	52.05	1.7	3.267	7.77	2.521	32.45
20140904-PurClathDigest-1ug-02	762	10990	385.6	1039	0	51.96	1.697	3.267	7.764	2.517	32.42
20140904-PurClathDigest-1ug-02	763	11000	386.3	1037	0	51.86	1.694	3.266	7.759	2.513	32.39
20140904-PurClathDigest-1ug-02	764	11010	386.9	1035	0	51.76	1.691	3.266	7.754	2.509	32.36
20140904-PurClathDigest-1ug-02	765	11020	387.6	1033	0	51.66	1.688	3.266	7.748	2.505	32.33
20140904-PurClathDigest-1ug-02	766	11020	388.2	1031	0	51.57	1.684	3.266	7.743	2.501	32.31
20140904-PurClathDigest-1ug-02	767	11030	388.8	1029	0	51.47	1.681	3.266	7.737	2.497	32.28
20140904-PurClathDigest-1ug-02	768	11040	389.5	1027	0	51.37	1.678	3.266	7.732	2.494	32.25
20140904-PurClathDigest-1ug-02	769	11050	390.1	1026	0	51.28	1.675	3.266	7.727	2.49	32.22
20140904-PurClathDigest-1ug-02	770	11050	390.8	1024	0	51.18	1.671	3.266	7.721	2.486	32.19
20140904-PurClathDigest-1ug-02	771	11050	391	1021	0	51.07	1.663	3.256	7.71	2.475	32.1
20140904-PurClathDigest-1ug-02	772	11050	391.3	1019	0	50.95	1.654	3.247	7.699	2.464	32.01
20140904-PurClathDigest-1ug-02	773	11050	391.6	1017	0	50.84	1.646	3.237	7.688	2.454	31.91
20140904-PurClathDigest-1ug-02	774	11060	391.9	1015	0	50.73	1.637	3.227	7.677	2.443	31.82
20140904-PurClathDigest-1ug-02	775	11060	392.2	1012	0	50.62	1.629	3.217	7.666	2.432	31.73
20140904-PurClathDigest-1ug-02	776	11060	392.4	1010	0	50.51	1.62	3.207	7.655	2.421	31.63
20140904-PurClathDigest-1ug-02	777	11060	392.7	1008	0	50.4	1.611	3.198	7.644	2.411	31.54
[truncated: 2,084 more rows]
