# Supplementary material for: The ∼16 kDa C-Terminal Sequence of Clathrin Assembly Protein AP180 Is Essential for Efficient Clathrin Binding
Source: PLoS One. 2014 Oct 20;9(10):e110557. doi: 10.1371/journal.pone.0110557 (PMC4203807; doi:10.1371/journal.pone.0110557)
Supplement: Data S2 — Contains the tabulated output of the MaxQuant software from processing the LC-MS/MS data of the tryptic digestion of purified clathrin. (ZIP) [file pone.0110557.s003.zip › txt/Oxidation (M)Sites.txt]

Proteins	Positions within proteins	Leading proteins	Protein	Fasta headers	Localization prob	Score diff	PEP	Score	Delta score	Score for localization	Localization prob 1	Score diff 1	PEP 1	Score 1	Localization prob 2	Score diff 2	PEP 2	Score 2	Localization prob 3	Score diff 3	PEP 3	Score 3	Diagnostic peak	Number of Oxidation (M)	Amino acid	Sequence window	Modification window	Peptide window coverage	Oxidation (M) Probabilities	Oxidation (M) Score diffs	Position in peptide	Charge	Mass error [ppm]	Intensity	Intensity___1	Intensity___2	Intensity___3	Ratio mod/base	Intensity 1	Ratio mod/base 1	Intensity 2	Ratio mod/base 2	Intensity 3	Ratio mod/base 3	Intensity 1___1	Intensity 1___2	Intensity 1___3	Intensity 2___1	Intensity 2___2
CON__P04264	469	CON__P04264	CON__P04264	>P04264 SWISS-PROT:P04264 Tax_Id=9606 Gene_Symbol=KRT1 Keratin, type II cytoskeletal 1	1	104.424	0.00529587	126.31	78.222	104.42	1	126.313	0.00529587	126.31	1	104.048	0.0234531	104.05	1	104.424	0.022015	104.42		1	M	AKEDLARLLRDYQELMNTKLALDLEIATYRT	X;X;X;X;X;X;X;X;X;X;X;X;X;X;X;Oxidation (M);X;X;X;X;X;X;X;X;X;X;X;X;X;X;X	XXXXXXXXXXPPPPPPPPPXXXXXXXXXXXX	DYQELM(1)NTK	DYQELM(104.42)NTK	6	2	0.19536	12539000	12539000	0	0	NaN	6750400	NaN	2923100	NaN	2865200	NaN	6750400	0	0	2923100	0
CON__P04264	259	CON__P04264	CON__P04264	>P04264 SWISS-PROT:P04264 Tax_Id=9606 Gene_Symbol=KRT1 Keratin, type II cytoskeletal 1	1	69.6504	0.00205107	114.01	110.37	69.65	1	91.7011	0.00771052	114.01	1	87.5679	0.00212659	107.95	1	69.6504	0.00205107	108.93		2	M	QLKSDQSRLDSELKNMQDMVEDYRNKYEDEI	X;X;X;X;X;X;X;X;X;X;X;X;X;X;X;Oxidation (M);X;X;Oxidation (M);X;X;X;X;X;X;X;X;X;X;X;X	XXXXXXXXPPPPPPPPPPPPPPPPXXXXXXX	NM(1)QDM(1)VEDYR	NM(69.65)QDM(69.65)VEDYR	2	2	1.2599	105320000	0	105320000	0	NaN	19581000	NaN	9914200	NaN	12610000	NaN	0	19581000	0	0	9914200
CON__P04264	262	CON__P04264	CON__P04264	>P04264 SWISS-PROT:P04264 Tax_Id=9606 Gene_Symbol=KRT1 Keratin, type II cytoskeletal 1	1	69.6504	0.00205107	114.01	110.37	69.65	1	91.7011	0.00771052	114.01	1	87.5679	0.00212659	107.95	1	69.6504	0.00205107	108.93		2	M	SDQSRLDSELKNMQDMVEDYRNKYEDEINKR	X;X;X;X;X;X;X;X;X;X;X;X;Oxidation (M);X;X;Oxidation (M);X;X;X;X;X;X;X;X;X;X;X;X;X;X;X	XXXXXPPPPPPPPPPPPPPPPXXXXXXXXXX	NM(1)QDM(1)VEDYR	NM(69.65)QDM(69.65)VEDYR	5	2	1.2599	105320000	0	105320000	0	NaN	19581000	NaN	9914200	NaN	12610000	NaN	0	19581000	0	0	9914200
CON__P13645	271	CON__P13645	CON__P13645	>P13645 SWISS-PROT:P13645 Tax_Id=9606 Gene_Symbol=KRT10 Keratin, type I cytoskeletal 10	1	107.154	8.06756E-09	156.13	29.291	107.15	1	156.13	8.06756E-09	156.13	1	107.154	0.000168436	107.15						1	M	RRVLDELTLTKADLEMQIESLTEELAYLKKN	X;X;X;X;X;X;X;X;X;X;X;X;X;X;X;Oxidation (M);X;X;X;X;X;X;X;X;X;X;X;X;X;X;X	XXXXXXXXXXXPPPPPPPPPPPPPPPPPPPX	ADLEM(1)QIESLTEELAYLKK	ADLEM(107.15)QIESLTEELAYLKK	5	3	0.52797	22182000	22182000	0	0	NaN	13014000	NaN	9168700	NaN	0	NaN	13014000	0	0	9168700	0
CON__P13645	291	CON__P13645	CON__P13645	>P13645 SWISS-PROT:P13645 Tax_Id=9606 Gene_Symbol=KRT10 Keratin, type I cytoskeletal 10	1	89.1712	0.00241675	122.7	98.445	89.171	1	91.5493	0.0179349	91.549	1	122.699	0.00241675	122.7	1	89.1712	0.0211818	89.171		1	M	LTEELAYLKKNHEEEMKDLRNVSTGDVNVEM	X;X;X;X;X;X;X;X;X;X;X;X;X;X;X;Oxidation (M);X;X;X;X;X;X;X;X;X;X;X;X;X;X;Oxidation (M)	XXXXXXXXXXPPPPPPPPPPXXXXXXXXXXX	NHEEEM(1)KDLR	NHEEEM(89.17)KDLR	6	3	-0.63838	49710000	49710000	0	0	NaN	27764000	NaN	12760000	NaN	9185900	NaN	27764000	0	0	12760000	0
CON__P13645;CON__P02535-1	306;304	CON__P13645	CON__P13645	>P13645 SWISS-PROT:P13645 Tax_Id=9606 Gene_Symbol=KRT10 Keratin, type I cytoskeletal 10;>P02535-1 SWISS-PROT:P02535-1 Tax_Id=10090 Gene_Symbol=Krt10 Isoform 1 of Keratin, type I cytoskeletal 10	1	40.2076	0.0563178	40.208	40.205	40.208					1	40.2076	0.0563178	40.208						2	M	MKDLRNVSTGDVNVEMNAAPGVDLTQLLNNM	Oxidation (M);X;X;X;X;X;X;X;X;X;X;X;X;X;X;Oxidation (M);X;X;X;X;X;X;X;X;X;X;X;X;X;X;Oxidation (M)	XXXXXPPPPPPPPPPPPPPPPPPPPPPPPPP	NVSTGDVNVEM(1)NAAPGVDLTQLLNNM(1)R	NVSTGDVNVEM(40.21)NAAPGVDLTQLLNNM(40.21)R	11	2	0.55219	14634000	0	14634000	0	3.7375	0	0	14634000	NaN	0	NaN	0	0	0	0	14634000
CON__P13645;CON__P02535-1	321;319	CON__P13645	CON__P13645	>P13645 SWISS-PROT:P13645 Tax_Id=9606 Gene_Symbol=KRT10 Keratin, type I cytoskeletal 10;>P02535-1 SWISS-PROT:P02535-1 Tax_Id=10090 Gene_Symbol=Krt10 Isoform 1 of Keratin, type I cytoskeletal 10	1	40.2076	0.0563178	40.208	40.205	40.208					1	40.2076	0.0563178	40.208						2	M	MNAAPGVDLTQLLNNMRSQYEQLAEQNRKDA	Oxidation (M);X;X;X;X;X;X;X;X;X;X;X;X;X;X;Oxidation (M);X;X;X;X;X;X;X;X;X;X;X;X;X;X;X	PPPPPPPPPPPPPPPPPXXXXXXXXXXXXXX	NVSTGDVNVEM(1)NAAPGVDLTQLLNNM(1)R	NVSTGDVNVEM(40.21)NAAPGVDLTQLLNNM(40.21)R	26	2	0.55219	14634000	0	14634000	0	3.7375	0	0	14634000	NaN	0	NaN	0	0	0	0	14634000
CON__P13645;CON__P02535-1;CON__A2A4G1;CON__P08779;Q148H6;CON__Q148H6;CON__Q7Z3Y7;Q0P5J4;CON__Q7Z3Z0;CON__Q7Z3Y8;Q0P5J6;CON__Q9Z2K1;CON__Q3ZAW8;CON__Q7Z3Y9	150;148;102;121;90;90;112;83;83;88;88;117;117;87	CON__P13645	CON__P13645	>P13645 SWISS-PROT:P13645 Tax_Id=9606 Gene_Symbol=KRT10 Keratin, type I cytoskeletal 10;>P02535-1 SWISS-PROT:P02535-1 Tax_Id=10090 Gene_Symbol=Krt10 Isoform 1 of Keratin, type I cytoskeletal 10;>A2A4G1 TREMBL:A2A4G1 Tax_Id=10090 Gene_Symbol=Krt15 Keratin c	1	112.107	0.000994259	143.03	118.2	112.11	1	143.034	0.000994259	143.03	1	130.656	0.000994259	130.66	1	112.107	0.0160131	112.11		1	M	FGGDGGLLSGNEKVTMQNLNDRLASYLDKVR	X;X;X;X;X;X;X;X;X;X;X;X;X;X;X;Oxidation (M);X;X;X;X;X;X;X;X;X;X;X;X;X;X;X	XXXXXXXXXXXXXPPPPPPPPPXXXXXXXXX	VTM(1)QNLNDR	VTM(112.11)QNLNDR	3	2	-0.93994	81879000	81879000	0	0	3.715	40990000	3.444	22392000	4.4387	18497000	3.6315	40990000	0	0	22392000	0
CON__P35527	245	CON__P35527	CON__P35527	>P35527 SWISS-PROT:P35527 Tax_Id=9606 Gene_Symbol=KRT9 Keratin, type I cytoskeletal 9	1	110.534	0.00111351	135.56	113.78	110.53	1	89.1712	0.00960036	103.01	1	115.574	0.00111351	115.57	1	110.534	0.00126138	135.56		1	M	DNTRMTLDDFRIKFEMEQNLRQGVDADINGL	X;X;X;X;Oxidation (M);X;X;X;X;X;X;X;X;X;X;Oxidation (M);X;X;X;X;X;X;X;X;X;X;X;X;Deamidation (NQ);X;X	XXXXXXXXXXXPPPPPPPPPPXXXXXXXXXX	IKFEM(1)EQNLR	IKFEM(110.53)EQNLR	5	2	0.73826	34595000	34595000	0	0	NaN	10597000	NaN	4853200	NaN	3002000	NaN	10597000	0	0	4853200	0
CON__P35527	234	CON__P35527	CON__P35527	>P35527 SWISS-PROT:P35527 Tax_Id=9606 Gene_Symbol=KRT9 Keratin, type I cytoskeletal 9	1	128.861	0.0147276	128.86	68.567	128.86	1	124.594	0.0158063	124.59	1	120.645	0.0168047	120.65	1	128.861	0.0147276	128.86		1	M	TVGNNKTLLDIDNTRMTLDDFRIKFEMEQNL	X;X;X;X;X;X;X;X;X;X;X;X;X;X;X;Oxidation (M);X;X;X;X;X;X;X;X;X;X;Oxidation (M);X;X;X;X	XXXXXXXXXXXXXXXPPPPPPPXXXXXXXXX	M(1)TLDDFR	M(128.86)TLDDFR	1	2	-0.16663	19092000	19092000	0	0	NaN	8843300	NaN	4392100	NaN	5856100	NaN	8843300	0	0	4392100	0
CON__P35527	296	CON__P35527	CON__P35527	>P35527 SWISS-PROT:P35527 Tax_Id=9606 Gene_Symbol=KRT9 Keratin, type I cytoskeletal 9	1	50.5049	0.0594955	50.505	49.908	50.505					1	50.5049	0.0594955	50.505						1	M	LQEELMALKKNHKEEMSQLTGQNSGDVNVEI	X;X;X;X;X;Oxidation (M);X;X;X;X;X;X;X;X;X;Oxidation (M);X;X;X;X;X;X;X;X;X;X;X;X;X;X;X	XXXXXXXXXXPPPPPPPPPPPPPPPPPPPPP	NHKEEM(1)SQLTGQNSGDVNVEINVAPGK	NHKEEM(50.5)SQLTGQNSGDVNVEINVAPGK	6	3	0.24806	5324800	5324800	0	0	NaN	0	NaN	5324800	NaN	0	NaN	0	0	0	5324800	0
CON__P35527	269	CON__P35527	CON__P35527	>P35527 SWISS-PROT:P35527 Tax_Id=9606 Gene_Symbol=KRT9 Keratin, type I cytoskeletal 9	1	99.9851	0.0078524	121.36	88.17	99.985	1	92.8661	0.022451	92.866	1	121.36	0.0078524	121.36	1	99.9851	0.0327952	99.985		1	M	DADINGLRQVLDNLTMEKSDLEMQYETLQEE	X;X;X;X;Deamidation (NQ);X;X;X;X;X;X;X;X;X;X;Oxidation (M);X;X;X;X;X;X;Oxidation (M);X;X;X;X;X;X;X;X	XXXXXXXXPPPPPPPPPPXXXXXXXXXXXXX	QVLDNLTM(1)EK	QVLDNLTM(99.99)EK	8	2	0.54127	27640000	27640000	0	0	NaN	12285000	NaN	8980700	NaN	6374000	NaN	12285000	0	0	8980700	0
CON__P35527	276	CON__P35527	CON__P35527	>P35527 SWISS-PROT:P35527 Tax_Id=9606 Gene_Symbol=KRT9 Keratin, type I cytoskeletal 9	1	140.894	0.000254179	140.89	139.26	140.89									1	140.894	0.000254179	140.89		2	M	RQVLDNLTMEKSDLEMQYETLQEELMALKKN	X;X;X;X;X;X;X;X;Oxidation (M);X;X;X;X;X;X;Oxidation (M);X;X;X;X;X;X;X;X;X;Oxidation (M);X;X;X;X;X	XXXXXXXXXXXPPPPPPPPPPPPPPPPPPPX	SDLEM(1)QYETLQEELM(1)ALKK	SDLEM(140.89)QYETLQEELM(140.89)ALKK	5	3	0.035701	5753900	0	5753900	0	NaN	0	NaN	0	NaN	5753900	NaN	0	0	0	0	0
CON__P35527	286	CON__P35527	CON__P35527	>P35527 SWISS-PROT:P35527 Tax_Id=9606 Gene_Symbol=KRT9 Keratin, type I cytoskeletal 9	1	140.894	0.000254179	140.89	139.26	140.89									1	140.894	0.000254179	140.89		2	M	KSDLEMQYETLQEELMALKKNHKEEMSQLTG	X;X;X;X;X;Oxidation (M);X;X;X;X;X;X;X;X;X;Oxidation (M);X;X;X;X;X;X;X;X;X;Oxidation (M);X;X;X;X;X	XPPPPPPPPPPPPPPPPPPPXXXXXXXXXXX	SDLEM(1)QYETLQEELM(1)ALKK	SDLEM(140.89)QYETLQEELM(140.89)ALKK	15	3	0.035701	5753900	0	5753900	0	NaN	0	NaN	0	NaN	5753900	NaN	0	0	0	0	0
CON__P35527	157	CON__P35527	CON__P35527	>P35527 SWISS-PROT:P35527 Tax_Id=9606 Gene_Symbol=KRT9 Keratin, type I cytoskeletal 9	1	166.089	0.000859483	166.09	127.31	166.09	1	153.245	0.000975679	153.24	1	152.061	0.000977968	152.06	1	166.089	0.000859483	166.09		1	M	GGGDGGILTANEKSTMQELNSRLASYLDKVQ	X;X;X;X;X;X;X;X;X;X;X;X;X;X;X;Oxidation (M);X;X;X;X;X;X;X;X;X;X;X;X;X;X;X	XXXXXXXXXXXXXPPPPPPPPPXXXXXXXXX	STM(1)QELNSR	STM(166.09)QELNSR	3	2	-0.066979	20100000	20100000	0	0	NaN	10356000	NaN	5944400	NaN	3800100	NaN	10356000	0	0	5944400	0
CON__P35908	473	CON__P35908	CON__P35908	>P35908 SWISS-PROT:P35908 Tax_Id=9606 Gene_Symbol=KRT2 Keratin, type II cytoskeletal 2 epidermal	1	98.044	0.0466061	98.044	85.881	98.044					1	98.044	0.0466061	98.044						1	M	AKEDLARLLRDYQELMNVKLALDVEIATYRK	X;X;X;X;X;X;X;X;X;X;X;X;X;X;X;Oxidation (M);X;X;X;X;X;X;X;X;X;X;X;X;X;X;X	XXXXXXXXXXPPPPPPPPPXXXXXXXXXXXX	DYQELM(1)NVK	DYQELM(98.04)NVK	6	2	0.61936	3436300	3436300	0	0	NaN	0	NaN	3436300	NaN	0	NaN	0	0	0	3436300	0
CON__P35908	263	CON__P35908	CON__P35908	>P35908 SWISS-PROT:P35908 Tax_Id=9606 Gene_Symbol=KRT2 Keratin, type II cytoskeletal 2 epidermal	1	84.2488	0.000202422	96.805	89.169	84.249	1	63.4363	0.0178507	63.436	1	96.8047	0.000202422	96.805	1	84.2488	0.00380948	84.249		1	M	GLTAERTSQNSELNNMQDLVEDYKKKYEDEI	X;X;X;X;X;X;X;X;X;X;X;X;X;X;X;Oxidation (M);X;X;X;X;X;X;X;X;X;X;X;X;X;X;X	XXXXXXPPPPPPPPPPPPPPPPPPPXXXXXX	TSQNSELNNM(1)QDLVEDYKK	TSQNSELNNM(84.25)QDLVEDYKK	10	3	-1.5376	42370000	42370000	0	0	9.4891	20319000	NaN	9995400	NaN	12055000	2.6998	20319000	0	0	9995400	0
CON__P35908	222	CON__P35908	CON__P35908	>P35908 SWISS-PROT:P35908 Tax_Id=9606 Gene_Symbol=KRT2 Keratin, type II cytoskeletal 2 epidermal	1	97.0574	0.0128344	97.057	96.405	97.057	1	63.0948	0.0552982	63.095	1	52.2491	0.0623724	52.249	1	97.0574	0.0128344	97.057		1	M	QQNQVLQTKWELLQQMNVGTRPINLEPIFQG	X;X;X;X;X;X;X;X;X;X;X;X;X;X;X;Oxidation (M);X;X;X;X;X;X;X;X;X;X;X;X;X;X;X	XXXXXXXXXPPPPPPPPPPPPPPPPPPPPPP	WELLQQM(1)NVGTRPINLEPIFQGYIDSLKR	WELLQQM(97.06)NVGTRPINLEPIFQGYIDSLKR	7	4	-0.17783	25786000	25786000	0	0	NaN	14129000	NaN	5508100	NaN	6148000	NaN	14129000	0	0	5508100	0
E1B7R4	526	E1B7R4	E1B7R4	>tr|E1B7R4|E1B7R4_BOVIN Eukaryotic translation initiation factor 3 subunit A OS=Bos taurus GN=EIF3A PE=3 SV=2	1	99.4999	0.0190535	99.5	67.171	99.5					1	99.4999	0.0190535	99.5						1	M	LQSMPSEQIRNQLTAMSSVLAKALEVIKPAH	X;X;X;X;X;X;X;X;X;X;X;X;X;X;X;Oxidation (M);X;X;X;X;X;X;X;X;X;X;X;X;X;X;X	XXXXXXXXXXPPPPPPPPPPPPXXXXXXXXX	NQLTAM(1)SSVLAK	NQLTAM(99.5)SSVLAK	6	2	1.3982	1711200	1711200	0	0	NaN	0	NaN	1711200	NaN	0	NaN	0	0	0	1711200	0
E1BDX8	1133	E1BDX8	E1BDX8	>tr|E1BDX8|E1BDX8_BOVIN Uncharacterized protein OS=Bos taurus GN=DYNC1H1 PE=4 SV=1	1	94.5693	0.000220947	94.569	92.518	94.569	1	54.7075	0.0222958	54.708	1	51.5352	0.0272904	51.535	1	94.5693	0.000220947	94.569		2	M	KYDSWHKEVLSKFGQMLGSNMTEFHSQISKS	X;X;X;X;X;X;X;X;X;X;X;X;X;X;X;Oxidation (M);X;X;X;X;Oxidation (M);X;X;X;X;X;X;X;X;X;X	XXXXXXXXXXXXPPPPPPPPPPPPPPPPPPX	FGQM(1)LGSNM(1)TEFHSQISK	FGQM(94.57)LGSNM(94.57)TEFHSQISK	4	3	-2.024	26200000	0	26200000	0	NaN	16597000	NaN	5863000	NaN	3740000	NaN	0	16597000	0	0	5863000
E1BDX8	1138	E1BDX8	E1BDX8	>tr|E1BDX8|E1BDX8_BOVIN Uncharacterized protein OS=Bos taurus GN=DYNC1H1 PE=4 SV=1	1	94.5693	0.000220947	94.569	92.518	94.569	1	54.7075	0.0222958	54.708	1	51.5352	0.0272904	51.535	1	94.5693	0.000220947	94.569		2	M	HKEVLSKFGQMLGSNMTEFHSQISKSRQELE	X;X;X;X;X;X;X;X;X;X;Oxidation (M);X;X;X;X;Oxidation (M);X;X;X;X;X;X;X;X;X;X;X;X;X;X;X	XXXXXXXPPPPPPPPPPPPPPPPPPXXXXXX	FGQM(1)LGSNM(1)TEFHSQISK	FGQM(94.57)LGSNM(94.57)TEFHSQISK	9	3	-2.024	26200000	0	26200000	0	NaN	16597000	NaN	5863000	NaN	3740000	NaN	0	16597000	0	0	5863000
E1BDX8	2994	E1BDX8	E1BDX8	>tr|E1BDX8|E1BDX8_BOVIN Uncharacterized protein OS=Bos taurus GN=DYNC1H1 PE=4 SV=1	1	143.284	1.22918E-07	143.28	136.95	143.28					1	118.308	3.84859E-05	118.31	1	143.284	1.22918E-07	143.28		1	M	VLRRSGCKNEKIAFIMDESNVLDSGFLERMN	X;X;X;X;X;X;X;X;X;X;X;X;X;X;X;Oxidation (M);X;X;X;X;X;X;X;X;X;X;X;X;X;X;X	XXXXXXXXXXXPPPPPPPPPPPPPPPPPPXX	IAFIM(1)DESNVLDSGFLER	IAFIM(143.28)DESNVLDSGFLER	5	2	-0.45355	10598000	10598000	0	0	NaN	0	NaN	6267600	NaN	4330200	NaN	0	0	0	6267600	0
E1BDX8	3256	E1BDX8	E1BDX8	>tr|E1BDX8|E1BDX8_BOVIN Uncharacterized protein OS=Bos taurus GN=DYNC1H1 PE=4 SV=1	1	112.437	1.52424E-05	139.86	130.08	112.44	1	107.387	0.000908448	107.39	1	139.858	1.52424E-05	139.86	1	112.437	0.000734891	112.44		1	M	KKMVKDQQEAEKKKVMSQEIQEQLHKQQEVI	X;X;X;X;X;X;X;X;X;X;X;X;X;X;X;Oxidation (M);X;X;X;X;X;X;X;X;X;X;X;X;X;X;X	XXXXXXXXXXXXXPPPPPPPPPPPPPXXXXX	KVM(1)SQEIQEQLHK	KVM(112.44)SQEIQEQLHK	3	3	1.4343	19836000	19836000	0	0	NaN	11165000	NaN	4896800	NaN	3774500	NaN	11165000	0	0	4896800	0
E1BDX8	4346	E1BDX8	E1BDX8	>tr|E1BDX8|E1BDX8_BOVIN Uncharacterized protein OS=Bos taurus GN=DYNC1H1 PE=4 SV=1	1	114.029	0.0117752	114.03	113.94	114.03	1	100.45	0.0174322	100.45					1	114.029	0.0117752	114.03		2	M	LLTTQGVDMISKMLKMQMLEDEDDLAYAETE	X;X;X;X;X;X;X;X;Oxidation (M);X;X;X;X;X;X;Oxidation (M);X;Oxidation (M);X;X;X;X;X;X;X;X;X;X;X;X;X	XXXXXXXXXXXXXXXPPPPPPPPPPPPPPPP	M(1)QM(1)LEDEDDLAYAETEKK	M(114.03)QM(114.03)LEDEDDLAYAETEKK	1	3	-0.85529	13229000	0	13229000	0	NaN	9049200	NaN	0	NaN	4179700	NaN	0	9049200	0	0	0
E1BDX8	4348	E1BDX8	E1BDX8	>tr|E1BDX8|E1BDX8_BOVIN Uncharacterized protein OS=Bos taurus GN=DYNC1H1 PE=4 SV=1	1	114.029	0.0117752	114.03	113.94	114.03	1	100.45	0.0174322	100.45					1	114.029	0.0117752	114.03		2	M	TTQGVDMISKMLKMQMLEDEDDLAYAETEKK	X;X;X;X;X;X;Oxidation (M);X;X;X;X;X;X;Oxidation (M);X;Oxidation (M);X;X;X;X;X;X;X;X;X;X;X;X;X;X;X	XXXXXXXXXXXXXPPPPPPPPPPPPPPPPPP	M(1)QM(1)LEDEDDLAYAETEKK	M(114.03)QM(114.03)LEDEDDLAYAETEKK	3	3	-0.85529	13229000	0	13229000	0	NaN	9049200	NaN	0	NaN	4179700	NaN	0	9049200	0	0	0
E1BDX8	2481	E1BDX8	E1BDX8	>tr|E1BDX8|E1BDX8_BOVIN Uncharacterized protein OS=Bos taurus GN=DYNC1H1 PE=4 SV=1	1	54.8342	0.00582061	61.276	60.394	54.834	1	61.2764	0.00582061	61.276					1	54.8342	0.0112824	54.834		1	M	CRNVAQYNANHPDFPMQSEQLERYIQRYLVY	X;X;X;X;X;X;X;X;X;X;X;X;X;X;X;Oxidation (M);X;X;X;X;X;X;X;X;X;X;X;X;X;X;X	XXPPPPPPPPPPPPPPPPPPPPPXXXXXXXX	NVAQYNANHPDFPM(1)QSEQLER	NVAQYNANHPDFPM(54.83)QSEQLER	14	3	-0.82825	19339000	19339000	0	0	NaN	12459000	NaN	0	NaN	6879400	NaN	12459000	0	0	0	0
E1BDX8	3199	E1BDX8	E1BDX8	>tr|E1BDX8|E1BDX8_BOVIN Uncharacterized protein OS=Bos taurus GN=DYNC1H1 PE=4 SV=1	1	101.421	0.000131306	111.81	102.54	101.42	1	107.688	0.000266419	107.69	1	111.808	0.000325786	111.81	1	101.421	0.000131306	101.42		1	M	ANLFHEKRSELEEQQMHLNVGLRKIKETVDQ	X;X;X;X;X;X;X;X;X;X;X;X;X;X;X;Oxidation (M);X;X;X;X;X;X;X;X;X;X;X;X;X;X;X	XXXXXXXPPPPPPPPPPPPPPPPXXXXXXXX	RSELEEQQM(1)HLNVGLR	RSELEEQQM(101.42)HLNVGLR	9	3	0.56194	16151000	16151000	0	0	NaN	9734300	NaN	3658100	NaN	2758400	NaN	9734300	0	0	3658100	0
E1BDX8	4339	E1BDX8	E1BDX8	>tr|E1BDX8|E1BDX8_BOVIN Uncharacterized protein OS=Bos taurus GN=DYNC1H1 PE=4 SV=1	1	112.437	0.000385101	123.28	116.11	112.44	1	93.3481	0.00746089	93.348	1	123.275	0.000385101	123.28	1	112.437	0.00452023	112.44		1	M	PNNAEKVLLTTQGVDMISKMLKMQMLEDEDD	X;X;X;X;X;X;X;X;X;X;X;X;X;X;X;Oxidation (M);X;X;X;X;X;X;Oxidation (M);X;Oxidation (M);X;X;X;X;X;X	XXXXXXPPPPPPPPPPPPPXXXXXXXXXXXX	VLLTTQGVDM(1)ISK	VLLTTQGVDM(112.44)ISK	10	2	0.57561	23911000	23911000	0	0	NaN	11302000	NaN	6545300	NaN	6063100	NaN	11302000	0	0	6545300	0
E1BDX8	504	E1BDX8	E1BDX8	>tr|E1BDX8|E1BDX8_BOVIN Uncharacterized protein OS=Bos taurus GN=DYNC1H1 PE=4 SV=1	1	63.9787	0.0330225	63.979	63.936	63.979	1	55.5877	0.0488076	55.588	1	46.0653	0.0560455	46.065	1	63.9787	0.0330225	63.979		1	M	AVAQQNQGEVPEPQDMKVAEVLFDAADANAI	X;X;X;X;X;X;X;X;X;X;X;X;X;X;X;Oxidation (M);X;X;X;X;X;X;X;X;X;X;X;X;X;X;X	PPPPPPPPPPPPPPPPPXXXXXXXXXXXXXX	VLRPQVTAVAQQNQGEVPEPQDM(1)K	VLRPQVTAVAQQNQGEVPEPQDM(63.98)K	23	3	-0.9227	62377000	62377000	0	0	NaN	34203000	NaN	14642000	NaN	13532000	NaN	34203000	0	0	14642000	0
E1BFB0	1352	E1BFB0	E1BFB0	>tr|E1BFB0|E1BFB0_BOVIN Uncharacterized protein OS=Bos taurus GN=SPTAN1 PE=4 SV=2	1	143.034	9.38569E-05	143.03	90.455	143.03					1	143.034	9.38569E-05	143.03						1	M	DSHDLQRFLSDFRDLMSWINGIRGLVSSDEL	X;X;X;X;X;X;X;X;X;X;X;X;X;X;X;Oxidation (M);X;X;X;Deamidation (NQ);X;X;X;X;X;X;X;X;X;X;X	XXXXXXXXXXXXXPPPPPPPPPPXXXXXXXX	DLM(1)SWINGIR	DLM(143.03)SWINGIR	3	2	-0.11401	1945200	1945200	0	0	NaN	0	NaN	1945200	NaN	0	NaN	0	0	0	1945200	0
E1BFB0	278	E1BFB0	E1BFB0	>tr|E1BFB0|E1BFB0_BOVIN Uncharacterized protein OS=Bos taurus GN=SPTAN1 PE=4 SV=2	1	86.4628	0.06188	86.463	80.207	86.463					1	86.4628	0.0618801	86.463	1	86.4628	0.06188	86.463		1	M	DVDETISWIKEKEQLMASDDFGRDLASVQAL	X;X;X;X;X;X;X;X;X;X;X;X;X;X;X;Oxidation (M);X;X;X;X;X;X;X;X;X;X;X;X;X;X;X	XXXXXXXXXXXXPPPPPPPPPPPXXXXXXXX	EQLM(1)ASDDFGR	EQLM(86.46)ASDDFGR	4	2	0.9095	3045700	3045700	0	0	NaN	0	NaN	1692200	NaN	1353500	NaN	0	0	0	1692200	0
E1BFB0	850	E1BFB0	E1BFB0	>tr|E1BFB0|E1BFB0_BOVIN Uncharacterized protein OS=Bos taurus GN=SPTAN1 PE=4 SV=2	1	102.895	0.00101369	111.77	107.42	102.89	1	89.358	0.00101369	111.77					1	102.895	0.00111072	102.89		1	M	GHEPRIKAVTQKGNAMVEEGHFAAEDVKAKL	X;X;X;X;X;X;X;X;X;X;X;X;X;X;X;Oxidation (M);X;X;X;X;X;X;X;X;X;X;X;X;X;X;X	XXXXXXXXXXXXPPPPPPPPPPPPPPPPXXX	GNAM(1)VEEGHFAAEDVK	GNAM(102.89)VEEGHFAAEDVK	4	2	0.11728	40237000	40237000	0	0	NaN	17783000	NaN	0	NaN	3932500	NaN	17783000	0	0	0	0
E1BFB0	1612	E1BFB0	E1BFB0	>tr|E1BFB0|E1BFB0_BOVIN Uncharacterized protein OS=Bos taurus GN=SPTAN1 PE=4 SV=2	1	96.7446	0.00973237	108.72	83.016	96.745	1	108.716	0.00973237	108.72					1	96.7446	0.0240801	96.745		1	M	AELHANADRIRGVIDMGNSLIDRGACAGSED	X;X;X;X;X;X;X;X;X;X;X;X;X;X;X;Oxidation (M);X;X;X;X;X;X;X;X;X;X;X;X;X;X;X	XXXXXXXXXXXPPPPPPPPPPPPXXXXXXXX	GVIDM(1)GNSLIDR	GVIDM(96.74)GNSLIDR	5	2	0.11245	7131100	7131100	0	0	NaN	4518300	NaN	0	NaN	2612700	NaN	4518300	0	0	0	0
E1BFB0	198	E1BFB0	E1BFB0	>tr|E1BFB0|E1BFB0_BOVIN Uncharacterized protein OS=Bos taurus GN=SPTAN1 PE=4 SV=2	1	102.389	0.000308746	110.84	108.7	102.39	1	86.4882	0.000432264	104.2	1	110.843	0.000308746	110.84	1	102.389	0.00163189	102.39		1	M	HVEVLQKKFEEFQTDMAAHEERVNEVNQFAA	X;X;X;X;X;X;X;X;X;X;X;X;X;X;X;Oxidation (M);X;X;X;X;X;X;X;X;X;X;X;X;X;X;X	XXXXXXXPPPPPPPPPPPPPPPXXXXXXXXX	KFEEFQTDM(1)AAHEER	KFEEFQTDM(102.39)AAHEER	9	3	-2.2484	34211000	34211000	0	0	NaN	14884000	NaN	7383900	NaN	6596800	NaN	14884000	0	0	7383900	0
E1BFB0	109	E1BFB0	E1BFB0	>tr|E1BFB0|E1BFB0_BOVIN Uncharacterized protein OS=Bos taurus GN=SPTAN1 PE=4 SV=2	1	91.5895	0.000284252	91.589	87.948	91.589	1	86.5392	0.000377695	86.539					1	91.5895	0.000284252	91.589		1	M	ANSGAIVKLDETGNLMISEGHFASETIRTRL	X;X;X;X;X;X;X;X;X;X;X;X;X;X;X;Oxidation (M);X;X;X;X;X;X;X;X;X;X;X;X;X;X;X	XXXXXXXXPPPPPPPPPPPPPPPPPPPPXXX	LDETGNLM(1)ISEGHFASETIR	LDETGNLM(91.59)ISEGHFASETIR	8	3	-1.264	17058000	17058000	0	0	NaN	12209000	NaN	0	NaN	4849100	NaN	12209000	0	0	0	0
E1BFB0	541	E1BFB0	E1BFB0	>tr|E1BFB0|E1BFB0_BOVIN Uncharacterized protein OS=Bos taurus GN=SPTAN1 PE=4 SV=2	1	76.3575	0.00386196	76.358	71.599	76.358	1	60.5489	0.0101238	60.549	1	70.2596	0.00539424	70.26	1	76.3575	0.00386196	76.358		1	M	LDEFATKLIQNNHYAMEDVATRRDALLSRRN	X;X;X;X;X;X;X;X;X;X;X;X;X;X;X;Oxidation (M);X;X;X;X;X;X;X;X;X;X;X;X;X;X;X	XXXXXXXPPPPPPPPPPPPPPPXXXXXXXXX	LIQNNHYAM(1)EDVATR	LIQNNHYAM(76.36)EDVATR	9	3	0.089269	17006000	17006000	0	0	NaN	8752800	NaN	4579000	NaN	3674100	NaN	8752800	0	0	4579000	0
E1BFB0	2304	E1BFB0	E1BFB0	>tr|E1BFB0|E1BFB0_BOVIN Uncharacterized protein OS=Bos taurus GN=SPTAN1 PE=4 SV=2	1	89.4403	0.0297029	89.44	82.963	89.44	1	89.4403	0.0297029	89.44										1	M	GLAQQWDQLDQLGMRMQHNLEQQIQARNTTG	X;X;X;X;X;X;X;X;X;X;X;X;X;Oxidation (M);X;Oxidation (M);X;X;X;X;X;X;X;X;X;X;X;X;X;X;X	XXXXXXXXXXXXXXXPPPPPPPPPPPPXXXX	M(1)QHNLEQQIQAR	M(89.44)QHNLEQQIQAR	1	2	1.7683	14050000	14050000	0	0	NaN	14050000	NaN	0	NaN	0	NaN	14050000	0	0	0	0
E1BFB0	1890	E1BFB0	E1BFB0	>tr|E1BFB0|E1BFB0_BOVIN Uncharacterized protein OS=Bos taurus GN=SPTAN1 PE=4 SV=2	1	82.6092	0.00294963	92.932	92.465	82.609	1	89.8587	0.00359122	89.859	1	92.9317	0.00294963	92.932	1	82.6092	0.00510474	82.609		1	M	FVANVEEEEAWINEKMTLVASEDYGDTLAAI	X;X;X;X;X;X;X;X;X;X;X;X;X;X;X;Oxidation (M);X;X;X;X;X;X;X;X;X;X;X;X;X;X;X	XXXXXXXXXXXXXXXPPPPPPPPPPPPPPPP	M(1)TLVASEDYGDTLAAIQGLLK	M(82.61)TLVASEDYGDTLAAIQGLLK	1	2	0.36904	8851700	8851700	0	0	NaN	4633300	NaN	2851400	NaN	1367000	NaN	4633300	0	0	2851400	0
E1BFB0	963	E1BFB0	E1BFB0	>tr|E1BFB0|E1BFB0_BOVIN Uncharacterized protein OS=Bos taurus GN=SPTAN1 PE=4 SV=2	1	89.1886	0.0404415	89.189	84.395	89.189									1	89.1886	0.0404415	89.189		1	M	ALREQAQSCRQQVAPMDDETGKELVLALYDY	X;X;X;X;X;X;X;X;X;X;X;X;X;X;X;Oxidation (M);X;X;X;X;X;X;X;X;X;X;X;X;X;X;X	XXXXXXXXXXPPPPPPPPPPPPXXXXXXXXX	QQVAPM(1)DDETGK	QQVAPM(89.19)DDETGK	6	2	-0.92799	1833200	1833200	0	0	NaN	0	NaN	0	NaN	1833200	NaN	0	0	0	0	0
E1BFB0	906	E1BFB0	E1BFB0	>tr|E1BFB0|E1BFB0_BOVIN Uncharacterized protein OS=Bos taurus GN=SPTAN1 PE=4 SV=2	1	65.4279	0.0273489	65.428	60.834	65.428					1	40.2076	0.0515459	40.208	1	65.4279	0.0273489	65.428		1	M	QAQQYFADANEAESWMREKEPIVGSTDYGKD	X;X;X;X;X;X;X;X;X;X;X;X;X;X;X;Oxidation (M);X;X;X;X;X;X;X;X;X;X;X;X;X;X;X	PPPPPPPPPPPPPPPPPXXXXXXXXXXXXXX	RQDLEDSLQAQQYFADANEAESWM(1)R	RQDLEDSLQAQQYFADANEAESWM(65.43)R	24	3	0.19329	15301000	15301000	0	0	NaN	0	NaN	8358500	NaN	6943000	NaN	0	0	0	8358500	0
E1BFB0	2172	E1BFB0	E1BFB0	>tr|E1BFB0|E1BFB0_BOVIN Uncharacterized protein OS=Bos taurus GN=SPTAN1 PE=4 SV=2	1	93.1152	0.00109488	96.391	93.896	93.115	1	96.3913	0.00109488	96.391	1	93.1152	0.00292589	93.115						1	M	IKSFRVASNPYTWFTMEALEETWRNLQKIIK	X;X;X;X;X;X;X;X;X;X;X;X;X;X;X;Oxidation (M);X;X;X;X;X;X;X;X;X;X;X;X;X;X;X	XXXXXPPPPPPPPPPPPPPPPPPPXXXXXXX	VASNPYTWFTM(1)EALEETWR	VASNPYTWFTM(93.12)EALEETWR	11	2	-2.0964	4905100	4905100	0	0	NaN	3748700	NaN	1156300	NaN	0	NaN	3748700	0	0	1156300	0
E1BFB0	773	E1BFB0	E1BFB0	>tr|E1BFB0|E1BFB0_BOVIN Uncharacterized protein OS=Bos taurus GN=SPTAN1 PE=4 SV=2	1	63.6941	0.0514504	66.56	62.219	63.694	1	61.3438	0.0541157	61.344	1	66.5599	0.0514504	66.56	1	63.6941	0.0529148	63.694		1	M	KQEALVARYEALKEPMVARKQKLADSLRLQQ	X;X;X;X;X;X;X;X;X;X;X;X;X;X;X;Oxidation (M);X;X;X;X;X;X;X;X;X;X;X;X;X;X;X	XXXXXXXXPPPPPPPPPPPXXXXXXXXXXXX	YEALKEPM(1)VAR	YEALKEPM(63.69)VAR	8	3	-0.81556	9663500	9663500	0	0	NaN	4941200	NaN	2761500	NaN	1960800	NaN	4941200	0	0	2761500	0
E1BFB0	2302	E1BFB0	E1BFB0	>tr|E1BFB0|E1BFB0_BOVIN Uncharacterized protein OS=Bos taurus GN=SPTAN1 PE=4 SV=2	1	97.4899	1.71252E-05	97.49	96.541	97.49	1	71.735	0.000556735	71.735	1	89.8306	0.000217049	89.831	1	97.4899	1.71252E-05	97.49		1	M	TVGLAQQWDQLDQLGMRMQHNLEQQIQARNT	X;X;X;X;X;X;X;X;X;X;X;X;X;X;X;Oxidation (M);X;Oxidation (M);X;X;X;X;X;X;X;X;X;X;X;X;X	PPPPPPPPPPPPPPPPPXXXXXXXXXXXXXX	YTEHSTVGLAQQWDQLDQLGM(1)R	YTEHSTVGLAQQWDQLDQLGM(97.49)R	21	3	-0.36238	32091000	32091000	0	0	NaN	14608000	NaN	8912500	NaN	8570200	NaN	14608000	0	0	8912500	0
E1BJB1;Q6B856	293;293	E1BJB1	E1BJB1	>tr|E1BJB1|E1BJB1_BOVIN Tubulin beta-2B chain OS=Bos taurus GN=TUBB2B PE=3 SV=1;>sp|Q6B856|TBB2B_BOVIN Tubulin beta-2B chain OS=Bos taurus GN=TUBB2B PE=1 SV=2	1	109.073	0.00225677	109.07	104.92	109.07	1	98.6762	0.00352583	98.676	1	81.4475	0.0278483	81.448	1	109.073	0.00225677	109.07		1	M	SQQYRALTVPELTQQMFDSKNMMAACDPRHG	X;X;X;X;X;X;X;X;X;X;X;X;X;X;X;Oxidation (M);X;X;X;X;X;X;X;X;X;X;X;X;X;X;X	XXXXXPPPPPPPPPPPPPPPXXXXXXXXXXX	ALTVPELTQQM(1)FDSK	ALTVPELTQQM(109.07)FDSK	11	2	-0.57536	73680000	73680000	0	0	NaN	46267000	NaN	12144000	NaN	15268000	NaN	46267000	0	0	12144000	0
E1BJB1;Q6B856;Q2KJD0;E1B953;Q3MHM5	330;330;330;330;330	E1BJB1;Q2KJD0;Q3MHM5	Q3MHM5	>tr|E1BJB1|E1BJB1_BOVIN Tubulin beta-2B chain OS=Bos taurus GN=TUBB2B PE=3 SV=1;>sp|Q6B856|TBB2B_BOVIN Tubulin beta-2B chain OS=Bos taurus GN=TUBB2B PE=1 SV=2;>sp|Q2KJD0|TBB5_BOVIN Tubulin beta-5 chain OS=Bos taurus GN=TUBB5 PE=2 SV=1;>tr|E1B953|E1B953_BOV	1	128.847	0.000442478	128.85	99.297	128.85	1	115.004	0.00247245	115					1	128.847	0.000442478	128.85		1	M	AIFRGRMSMKEVDEQMLNVQNKNSSYFVEWI;AVFRGRMSMKEVDEQMLNVQNKNSSYFVEWI	X;X;X;X;X;X;X;X;X;X;X;X;X;X;X;Oxidation (M);X;X;X;X;X;X;X;X;X;X;X;X;X;X;X	XXXXXXXXXXPPPPPPPPPPPPXXXXXXXXX	EVDEQM(1)LNVQNK	EVDEQM(128.85)LNVQNK	6	2	-0.1072	61299000	61299000	0	0	NaN	40158000	NaN	0	NaN	21141000	NaN	40158000	0	0	0	0
E1BJB1;Q6B856;Q2KJD0;Q2T9S0;Q3MHM5;Q3ZBU7	388;388;388;388;388;388	E1BJB1;Q2KJD0;Q2T9S0;Q3MHM5;Q3ZBU7	Q3MHM5	>tr|E1BJB1|E1BJB1_BOVIN Tubulin beta-2B chain OS=Bos taurus GN=TUBB2B PE=3 SV=1;>sp|Q6B856|TBB2B_BOVIN Tubulin beta-2B chain OS=Bos taurus GN=TUBB2B PE=1 SV=2;>sp|Q2KJD0|TBB5_BOVIN Tubulin beta-5 chain OS=Bos taurus GN=TUBB5 PE=2 SV=1;>sp|Q2T9S0|TBB3_BOVIN	1	123.513	0.000307527	147.78	94.75	123.51	1	132.319	0.000800116	132.32	1	147.778	0.000307527	147.78	1	123.513	0.0102534	123.51		1	M	AIQELFKRISEQFTAMFRRKAFLHWYTGEGM	X;X;X;X;X;X;X;X;X;X;X;X;X;X;X;Oxidation (M);X;X;X;X;X;X;X;X;X;X;X;X;X;X;X	XXXXXXXXPPPPPPPPPPXXXXXXXXXXXXX	ISEQFTAM(1)FR	ISEQFTAM(123.51)FR	8	2	1.2938	66079000	66079000	0	0	NaN	34467000	NaN	16692000	NaN	14920000	NaN	34467000	0	0	16692000	0
E1BJB1;Q6B856;G3X7R7;G3N1W7;E1BJK2;CON__ENSEMBL:ENSBTAP00000025008;Q2KJD0;Q2T9S0;Q3MHM5;G3X7R8;Q2HJ81;Q3ZBU7	257;257;257;257;257;343;257;257;257;165;257;257	E1BJB1;Q2KJD0;Q2T9S0;Q3MHM5;Q3ZBU7	Q3MHM5	>tr|E1BJB1|E1BJB1_BOVIN Tubulin beta-2B chain OS=Bos taurus GN=TUBB2B PE=3 SV=1;>sp|Q6B856|TBB2B_BOVIN Tubulin beta-2B chain OS=Bos taurus GN=TUBB2B PE=1 SV=2;>tr|G3X7R7|G3X7R7_BOVIN Tubulin beta-2B chain OS=Bos taurus GN=TUBB2B PE=3 SV=1;>tr|G3N1W7|G3N1W7	1	111.061	0.000106299	131.11	115.48	111.06	1	131.105	0.000106299	131.11	1	102.067	0.000788486	124.74	1	111.061	0.0246687	111.06		1	M	FPGQLNADLRKLAVNMVPFPRLHFFMPGFAP	X;X;X;X;X;X;X;X;X;X;X;X;X;X;X;Oxidation (M);X;X;X;X;X;X;X;X;X;Oxidation (M);X;X;X;X;X	XXXXXXXXXXPPPPPPPPPPPXXXXXXXXXX	LAVNM(1)VPFPR	LAVNM(111.06)VPFPR	5	2	0.16002	71218000	71218000	0	0	NaN	13343000	NaN	8275600	NaN	6155100	NaN	13343000	0	0	8275600	0
E1BJB1;Q6B856;G3X7R7;G3N1W7;Q2KJD0;Q3MHM5;Q3ZBU7	267;267;267;267;267;267;267	E1BJB1;Q2KJD0;Q3MHM5;Q3ZBU7	Q3MHM5	>tr|E1BJB1|E1BJB1_BOVIN Tubulin beta-2B chain OS=Bos taurus GN=TUBB2B PE=3 SV=1;>sp|Q6B856|TBB2B_BOVIN Tubulin beta-2B chain OS=Bos taurus GN=TUBB2B PE=1 SV=2;>tr|G3X7R7|G3X7R7_BOVIN Tubulin beta-2B chain OS=Bos taurus GN=TUBB2B PE=3 SV=1;>tr|G3N1W7|G3N1W7	1	139.705	8.34406E-05	139.7	130.38	139.7	1	83.2035	0.00268069	83.204	1	113.539	0.000473265	113.54	1	139.705	8.34406E-05	139.7		1	M	KLAVNMVPFPRLHFFMPGFAPLTSRGSQQYR	X;X;X;X;X;Oxidation (M);X;X;X;X;X;X;X;X;X;Oxidation (M);X;X;X;X;X;X;X;X;X;X;X;X;X;X;X	XXXXXXXXXXXPPPPPPPPPPPPPPXXXXXX	LHFFM(1)PGFAPLTSR	LHFFM(139.7)PGFAPLTSR	5	2	-1.4922	67445000	67445000	0	0	NaN	24832000	NaN	15179000	NaN	10015000	NaN	24832000	0	0	15179000	0
E1BJB1;Q6B856;Q3MHM5;G3X7R8;Q2HJ81	363;363;363;271;363	E1BJB1;Q3MHM5	Q3MHM5	>tr|E1BJB1|E1BJB1_BOVIN Tubulin beta-2B chain OS=Bos taurus GN=TUBB2B PE=3 SV=1;>sp|Q6B856|TBB2B_BOVIN Tubulin beta-2B chain OS=Bos taurus GN=TUBB2B PE=1 SV=2;>sp|Q3MHM5|TBB4B_BOVIN Tubulin beta-4B chain OS=Bos taurus GN=TUBB4B PE=2 SV=1;>tr|G3X7R8|G3X7R8_	1	130.007	1.51075E-07	149	18.709	130.01					1	149.004	1.51075E-07	149	1	130.007	6.286E-05	130.01		1	M	NVKTAVCDIPPRGLKMSATFIGNSTAIQELF	X;X;X;X;X;X;X;X;X;X;X;X;X;X;X;Oxidation (M);X;X;X;X;X;X;X;X;X;X;X;X;X;X;X	XXXXXXXXXXXXXXXPPPPPPPPPPPPPPPP	M(1)SATFIGNSTAIQELFK	M(130.01)SATFIGNSTAIQELFK	1	2	0.070597	13210000	13210000	0	0	NaN	0	NaN	7722500	NaN	5487100	NaN	0	0	0	7722500	0
E1BKN2	1338	E1BKN2	E1BKN2	>tr|E1BKN2|E1BKN2_BOVIN Uncharacterized protein OS=Bos taurus GN=TNR PE=4 SV=1	1	144.572	4.27557E-06	168.98	164.83	144.57	1	168.984	4.27557E-06	168.98	1	144.572	0.000167353	144.57						1	M	WYHWKGHEFSIPFVEMKMRPYSHRLVAGRKR	X;X;X;X;X;X;X;X;X;X;X;X;X;X;X;Oxidation (M);X;X;X;X;X;X;X;X;X;X;X;X;X;X;X	XXXXXPPPPPPPPPPPPXXXXXXXXXXXXXX	GHEFSIPFVEM(1)K	GHEFSIPFVEM(144.57)K	11	2	1.0438	19409000	19409000	0	0	NaN	13149000	NaN	6260500	NaN	0	NaN	13149000	0	0	6260500	0
F1MDZ2;O77788	163;163	F1MDZ2	F1MDZ2	>tr|F1MDZ2|F1MDZ2_BOVIN Neurofilament medium polypeptide OS=Bos taurus GN=NEFM PE=4 SV=2;>sp|O77788|NFM_BOVIN Neurofilament medium polypeptide OS=Bos taurus GN=NEFM PE=1 SV=3	1	99.9731	0.000358104	157.14	146.55	99.973	1	107.078	0.00195782	118.23	1	104.221	0.000358104	157.14	1	99.9731	0.000778738	134.84		1	M	DAYDQEIRELRATLEMVNHEKAQVQLDSDHL	X;X;X;X;X;X;X;X;X;X;X;X;X;X;X;Oxidation (M);X;X;X;X;X;X;X;X;X;X;X;X;X;X;X	XXXXXXXXXXXPPPPPPPPPPXXXXXXXXXX	ATLEM(1)VNHEK	ATLEM(99.97)VNHEK	5	3	0.63724	206240000	206240000	0	0	NaN	42508000	NaN	20715000	NaN	14321000	NaN	42508000	0	0	20715000	0
F1MDZ2;O77788	377;377	F1MDZ2	F1MDZ2	>tr|F1MDZ2|F1MDZ2_BOVIN Neurofilament medium polypeptide OS=Bos taurus GN=NEFM PE=4 SV=2;>sp|O77788|NFM_BOVIN Neurofilament medium polypeptide OS=Bos taurus GN=NEFM PE=1 SV=3	1	110.218	0.0122337	110.22	94.339	110.22					1	90.1349	0.032265	90.135	1	110.218	0.0122337	110.22		1	M	TIQQLENELRGTKWEMARHLREYQDLLNVKM	X;X;X;X;X;X;X;X;X;X;X;X;X;X;X;Oxidation (M);X;X;X;X;X;X;X;X;X;X;X;X;X;X;Oxidation (M)	XXXXXXXXXXPPPPPPPPXXXXXXXXXXXXX	GTKWEM(1)AR	GTKWEM(110.22)AR	6	2	0.40892	3787600	3787600	0	0	NaN	0	NaN	2223700	NaN	1563900	NaN	0	0	0	2223700	0
F1MDZ2;O77788	593;593	F1MDZ2	F1MDZ2	>tr|F1MDZ2|F1MDZ2_BOVIN Neurofilament medium polypeptide OS=Bos taurus GN=NEFM PE=4 SV=2;>sp|O77788|NFM_BOVIN Neurofilament medium polypeptide OS=Bos taurus GN=NEFM PE=1 SV=3	1	136.715	2.73568E-05	168.18	157.83	136.72	1	76.9388	0.0561559	76.939	1	168.179	2.73568E-05	168.18	1	136.715	0.00143614	136.72		1	M	GEGEEAAAEAKEEKKMEEKAEEVAPKEELAA	X;X;X;X;X;X;X;X;X;X;X;X;X;X;X;Oxidation (M);X;X;X;X;X;X;X;X;X;X;X;X;X;X;X	XXXXXXXXXXXXXXPPPPPPPPPPPPXXXXX	KM(1)EEKAEEVAPK	KM(136.72)EEKAEEVAPK	2	3	1.4145	29890000	29890000	0	0	NaN	16049000	NaN	7291600	NaN	6549600	NaN	16049000	0	0	7291600	0
F1MDZ2;O77788;F1MSQ6;P02548;Q08DH7	392;392;387;381;387	F1MDZ2;F1MSQ6;P02548;Q08DH7	F1MDZ2	>tr|F1MDZ2|F1MDZ2_BOVIN Neurofilament medium polypeptide OS=Bos taurus GN=NEFM PE=4 SV=2;>sp|O77788|NFM_BOVIN Neurofilament medium polypeptide OS=Bos taurus GN=NEFM PE=1 SV=3;>tr|F1MSQ6|F1MSQ6_BOVIN Uncharacterized protein (Fragment) OS=Bos taurus GN=NEFH	1	163.827	1.05837E-18	181.87	123.18	163.83	1	181.681	2.06915E-07	181.68	1	163.117	1.05837E-18	181.87	1	163.827	3.51875E-06	176.48		1	M	MAAQLREYQDLLNVKMALDIEIAAYRKLLEG;MARHLREYQDLLNVKMALDIEIAAYRKLLEG;MARYLKEYQDLLNVKMALDIEIAAYRKLLEG	Oxidation (M);X;X;X;X;X;X;X;X;X;X;X;X;X;X;Oxidation (M);X;X;X;X;X;X;X;X;X;X;X;X;X;X;X	XXXXXXXXXXXXXXXPPPPPPPPPPPPXXXX	M(1)ALDIEIAAYRK	M(163.83)ALDIEIAAYRK	1	2	1.3565	455230000	455230000	0	0	NaN	14051000	NaN	5529100	NaN	4156500	NaN	14051000	0	0	5529100	0
F1MDZ2;O77788	285;285	F1MDZ2	F1MDZ2	>tr|F1MDZ2|F1MDZ2_BOVIN Neurofilament medium polypeptide OS=Bos taurus GN=NEFM PE=4 SV=2;>sp|O77788|NFM_BOVIN Neurofilament medium polypeptide OS=Bos taurus GN=NEFM PE=1 SV=3	1	107.78	8.61568E-09	128.01	127.73	107.78	1	101.169	1.34292E-06	127.32	1	125.227	2.45024E-06	125.23	1	107.78	8.61568E-09	128.01		1	M	LKEIRSQLESHSDQNMHQAEEWFKCRYAKLT	X;X;X;X;X;X;X;X;X;X;X;X;X;Deamidation (NQ);Deamidation (NQ);Oxidation (M);X;X;X;X;X;X;X;X;X;X;X;X;X;X;X	XXXXXPPPPPPPPPPPPPPPPPPPXXXXXXX	SQLESHSDQNM(1)HQAEEWFK	SQLESHSDQNM(107.78)HQAEEWFK	11	3	0.44201	515040000	515040000	0	0	NaN	31417000	NaN	21298000	NaN	19336000	NaN	31417000	0	0	21298000	0
F1MEW3	269	F1MEW3	F1MEW3	>tr|F1MEW3|F1MEW3_BOVIN Microtubule-associated protein OS=Bos taurus GN=MAP2 PE=3 SV=1	1	95.4772	0.0023391	124.42	113.78	95.477	1	124.423	0.0023391	124.42	1	110.077	0.0112785	110.08	1	95.4772	0.0498543	95.477		1	M	AEPTAAKEQKDWFIQMPTEAKKDEWGLVAPV	X;X;X;X;X;X;X;X;X;X;X;X;X;X;X;Oxidation (M);X;X;X;X;X;X;X;X;X;X;X;X;X;X;X	XXXXXXXXXXPPPPPPPPPPPXXXXXXXXXX	DWFIQM(1)PTEAK	DWFIQM(95.48)PTEAK	6	2	-0.54958	91954000	91954000	0	0	NaN	67329000	NaN	13442000	NaN	11183000	NaN	67329000	0	0	13442000	0
F1MEW3	615	F1MEW3	F1MEW3	>tr|F1MEW3|F1MEW3_BOVIN Microtubule-associated protein OS=Bos taurus GN=MAP2 PE=3 SV=1	1	125.356	4.90564E-05	140.27	135.93	125.36	1	140.274	4.90564E-05	140.27	1	128.707	0.00141381	128.71	1	125.356	0.000186481	125.36		1	M	DTRESVQEAFDTVSPMHKDGDKALPEEEPQP	X;X;X;X;X;X;X;X;X;X;X;X;X;X;X;Oxidation (M);X;X;X;X;X;X;X;X;X;X;X;X;X;X;X	XXXPPPPPPPPPPPPPPPXXXXXXXXXXXXX	ESVQEAFDTVSPM(1)HK	ESVQEAFDTVSPM(125.36)HK	13	2	0.59092	72173000	72173000	0	0	NaN	50992000	NaN	12040000	NaN	9141700	NaN	50992000	0	0	12040000	0
F1MEW3	414	F1MEW3	F1MEW3	>tr|F1MEW3|F1MEW3_BOVIN Microtubule-associated protein OS=Bos taurus GN=MAP2 PE=3 SV=1	1	84.5074	7.11638E-05	164.9	132.68	84.507	1	82.5048	0.00100673	138.45	1	84.4793	7.11638E-05	164.9	1	84.5074	7.11638E-05	158.3		1	M	VEECVPEKVSGEEKGMIKEESVQIKETPTLS	X;X;X;X;X;X;X;X;X;X;X;X;X;X;X;Oxidation (M);X;X;X;X;X;X;X;X;X;X;X;X;X;X;X	XXXXXXXXXXXXXXPPPPPPPPPPPXXXXXX	GM(1)IKEESVQIK	GM(84.51)IKEESVQIK	2	3	0.56674	281680000	281680000	0	0	NaN	83566000	NaN	27613000	NaN	16581000	NaN	83566000	0	0	27613000	0
F1MEW3	1066	F1MEW3	F1MEW3	>tr|F1MEW3|F1MEW3_BOVIN Microtubule-associated protein OS=Bos taurus GN=MAP2 PE=3 SV=1	1	88.8715	4.92599E-05	96.016	92.778	88.872	1	92.0984	0.000407337	92.098	1	80.412	4.92599E-05	96.016	1	88.8715	0.000428255	89.663		1	M	AEQGQLDIKISDFGQMASGLHVDAGEAAELK	X;X;X;X;X;X;X;X;X;X;X;X;X;X;X;Oxidation (M);X;X;X;X;X;X;X;X;X;X;X;X;X;X;X	XXXXXXXXXPPPPPPPPPPPPPPPPPPPPPP	ISDFGQM(1)ASGLHVDAGEAAELK	ISDFGQM(88.87)ASGLHVDAGEAAELK	7	2	0.93056	107720000	107720000	0	0	NaN	58375000	NaN	20296000	NaN	18132000	NaN	58375000	0	0	20296000	0
F1MEW3	292	F1MEW3	F1MEW3	>tr|F1MEW3|F1MEW3_BOVIN Microtubule-associated protein OS=Bos taurus GN=MAP2 PE=3 SV=1	1	80.4101	0.00614355	90.758	89.794	80.41	1	90.7581	0.0277601	90.758	1	87.8918	0.00614355	87.892	1	80.4101	0.0384262	80.41		1	M	EWGLVAPVSPGPLTPMKEKDVLEDIPKWEGK	X;X;X;X;X;X;X;X;X;X;X;X;X;X;X;Oxidation (M);X;X;X;X;X;X;X;X;X;X;X;X;X;X;X	PPPPPPPPPPPPPPPPPPPXXXXXXXXXXXX	KDEWGLVAPVSPGPLTPM(1)KEK	KDEWGLVAPVSPGPLTPM(80.41)KEK	18	3	-0.3286	134340000	134340000	0	0	NaN	36625000	NaN	9527400	NaN	7271000	NaN	36625000	0	0	9527400	0
F1MEW3	456	F1MEW3	F1MEW3	>tr|F1MEW3|F1MEW3_BOVIN Microtubule-associated protein OS=Bos taurus GN=MAP2 PE=3 SV=1	1	64.5199	0.00215567	135.09	104.61	64.52	1	110.572	0.00509683	110.57	1	135.09	0.00215567	135.09	1	64.5199	0.00725355	102.63		1	M	HLKLEEKPTISDKEAMPKESEPPKLIDEETN	X;X;X;X;X;X;X;X;X;X;X;X;X;X;X;Oxidation (M);X;X;X;X;X;X;X;X;X;X;X;X;X;X;X	XXXPPPPPPPPPPPPPPPXXXXXXXXXXXXX	LEEKPTISDKEAM(1)PK	LEEKPTISDKEAM(64.52)PK	13	4	0.36763	125840000	125840000	0	0	NaN	54915000	NaN	22681000	NaN	18448000	NaN	54915000	0	0	22681000	0
F1MEW3	159	F1MEW3	F1MEW3	>tr|F1MEW3|F1MEW3_BOVIN Microtubule-associated protein OS=Bos taurus GN=MAP2 PE=3 SV=1	1	132.015	4.14552E-10	162.32	161.33	132.01	1	144.746	2.85104E-06	144.75	1	162.324	4.14552E-10	162.32	1	132.015	6.40117E-06	132.01		1	M	EQTVPVEEGLLTASKMEFHDQQELTPSPAEP	X;X;X;X;X;X;X;X;X;X;X;X;X;X;X;Oxidation (M);X;X;X;X;X;X;X;X;X;X;X;X;X;X;X	XXXXXXXXXXXXXXXPPPPPPPPPPPPPPPP	M(1)EFHDQQELTPSPAEPLDKK	M(132.01)EFHDQQELTPSPAEPLDKK	1	2	0.062814	366810000	366810000	0	0	21.096	33013000	1.8986	19405000	NaN	9930900	NaN	33013000	0	0	19405000	0
F1MEW3	1410	F1MEW3	F1MEW3	>tr|F1MEW3|F1MEW3_BOVIN Microtubule-associated protein OS=Bos taurus GN=MAP2 PE=3 SV=1	1	194.229	2.40332E-11	204.23	190.44	194.23	1	182.022	1.52736E-08	182.02	1	204.231	2.40332E-11	204.23	1	194.229	4.18124E-10	194.23		1	M	ADSLWVDTQDDDRSIMTEQLETIPKEEKAEK	X;X;X;X;X;X;X;X;X;X;X;X;X;X;X;Oxidation (M);X;X;X;X;X;X;X;X;X;X;X;X;X;X;X	XXXXXXXXXXXXXPPPPPPPPPPPPPPPXXX	SIM(1)TEQLETIPKEEK	SIM(194.23)TEQLETIPKEEK	3	2	-0.70175	351230000	351230000	0	0	NaN	54596000	NaN	40919000	NaN	26847000	NaN	54596000	0	0	40919000	0
F1MEW3	563	F1MEW3	F1MEW3	>tr|F1MEW3|F1MEW3_BOVIN Microtubule-associated protein OS=Bos taurus GN=MAP2 PE=3 SV=1	1	77.2698	0.00455846	77.27	76.586	77.27					1	77.2698	0.00455846	77.27						1	M	HKVEGVGVVTSAELDMPFYEDKSGMSKYFET	X;X;X;X;X;X;X;X;X;X;X;X;X;X;X;Oxidation (M);X;X;X;X;X;X;X;X;X;X;X;X;X;X;X	XXPPPPPPPPPPPPPPPPPPPPXXXXXXXXX	VEGVGVVTSAELDM(1)PFYEDK	VEGVGVVTSAELDM(77.27)PFYEDK	14	2	-0.30227	25053000	25053000	0	0	NaN	0	NaN	25053000	NaN	0	NaN	0	0	0	25053000	0
F1MEW3	523	F1MEW3	F1MEW3	>tr|F1MEW3|F1MEW3_BOVIN Microtubule-associated protein OS=Bos taurus GN=MAP2 PE=3 SV=1	1	102.4	0.0206224	102.4	66.083	102.4	1	102.4	0.0206225	102.4	1	91.9612	0.0504762	91.961	1	102.4	0.0206224	102.4		1	M	AVTDSAMTTQTLEKVMTEPTALSEKIATQEL	X;X;X;X;X;X;X;X;X;X;X;X;X;X;X;Oxidation (M);X;X;X;X;X;X;X;X;X;X;X;X;X;X;X	XXXXXXXXXXXXXXPPPPPPPPPPPXXXXXX	VM(1)TEPTALSEK	VM(102.4)TEPTALSEK	2	2	0.12779	144530000	144530000	0	0	NaN	75649000	NaN	38934000	NaN	29950000	NaN	75649000	0	0	38934000	0
F1MGT4	42	F1MGT4	F1MGT4	>tr|F1MGT4|F1MGT4_BOVIN Uncharacterized protein (Fragment) OS=Bos taurus GN=SNAP91 PE=4 SV=2	1	81.6316	0.000578236	90.707	77.289	81.632	1	59.7088	0.0130897	59.709	1	90.7071	0.00108275	90.707	1	81.6316	0.000578236	81.632		1	M	SWVVVFKALVTTHHLMVHGNERFIQYLASRN	X;X;X;X;X;X;X;X;X;X;X;X;X;X;X;Oxidation (M);X;X;X;X;X;X;X;X;X;X;X;X;X;X;X	XXXXXXXPPPPPPPPPPPPPPPXXXXXXXXX	ALVTTHHLM(1)VHGNER	ALVTTHHLM(81.63)VHGNER	9	4	0.15001	52848000	52848000	0	0	NaN	33051000	NaN	11256000	NaN	8541800	NaN	33051000	0	0	11256000	0
F1MGT4	76	F1MGT4	F1MGT4	>tr|F1MGT4|F1MGT4_BOVIN Uncharacterized protein (Fragment) OS=Bos taurus GN=SNAP91 PE=4 SV=2	1	109.6	0.00499552	109.6	108.45	109.6	1	73.877	0.0418851	73.877	1	109.6	0.00499552	109.6						1	M	NLSNFLDKSGSHGYDMSTFIRRYSRYLNEKA	X;X;X;X;X;X;X;X;X;X;X;X;X;X;X;Oxidation (M);X;X;X;X;X;X;X;X;X;X;X;X;X;X;X	XXXXXXXXPPPPPPPPPPPPPXXXXXXXXXX	SGSHGYDM(1)STFIR	SGSHGYDM(109.6)STFIR	8	2	0.20005	21270000	21270000	0	0	NaN	14764000	NaN	6505500	NaN	0	NaN	14764000	0	0	6505500	0
F1MIC9	870	F1MIC9	F1MIC9	>tr|F1MIC9|F1MIC9_BOVIN Uncharacterized protein OS=Bos taurus GN=DCTN1 PE=4 SV=1	1	91.2382	0.0233856	91.238	89.708	91.238	1	63.376	0.0586362	63.376	1	91.2382	0.0233856	91.238	1	91.2382	0.0249227	91.238		1	M	SCSLLISTMNKLATAMQEGEYDAERPPSKPP	X;X;X;X;X;X;X;X;X;X;X;X;X;X;X;Oxidation (M);X;X;X;X;X;X;X;X;X;X;X;X;X;X;X	XXXXXXXXXXXPPPPPPPPPPPPPPPPPPPP	LATAM(1)QEGEYDAERPPSKPPPVELR	LATAM(91.24)QEGEYDAERPPSKPPPVELR	5	3	-1.0135	82605000	82605000	0	0	NaN	48355000	NaN	21895000	NaN	8635200	NaN	48355000	0	0	21895000	0
F1MIC9	228	F1MIC9	F1MIC9	>tr|F1MIC9|F1MIC9_BOVIN Uncharacterized protein OS=Bos taurus GN=DCTN1 PE=4 SV=1	1	152.069	0.000295961	160.18	153.28	152.07	1	143.96	0.000572768	143.96	1	160.183	0.000295961	160.18	1	152.069	0.000419779	152.07		1	M	KHKIQLEQVQEWKSKMQEQQADLQRRLKEAR	X;X;X;X;X;X;X;X;X;X;X;X;X;X;X;Oxidation (M);X;X;X;X;X;X;X;X;X;X;X;X;X;X;X	XXXXXXXXXXXXXXXPPPPPPPPPPXXXXXX	M(1)QEQQADLQR	M(152.07)QEQQADLQR	1	2	3.5402	20604000	20604000	0	0	NaN	10879000	NaN	5508400	NaN	4216900	NaN	10879000	0	0	5508400	0
G3N3N0;F1MQL2;G3N0C1	861;879;909	G3N3N0	G3N3N0	>tr|G3N3N0|G3N3N0_BOVIN Uncharacterized protein (Fragment) OS=Bos taurus GN=ANK2 PE=4 SV=1;>tr|F1MQL2|F1MQL2_BOVIN Uncharacterized protein (Fragment) OS=Bos taurus GN=ANK2 PE=4 SV=2;>tr|G3N0C1|G3N0C1_BOVIN Uncharacterized protein (Fragment) OS=Bos taurus G	1	59.7277	0.0121986	68.576	65.911	59.728					1	68.5765	0.0121986	68.576	1	59.7277	0.0276324	59.728		2	M	TRVTCRLVKRHRLATMPPMVEGEGLASRLIE	X;X;X;X;X;X;X;X;X;X;X;X;X;X;X;Oxidation (M);X;X;Oxidation (M);X;X;X;X;X;X;X;X;X;X;X;X	XXXXXXXXXXXXPPPPPPPPPPPPPPPPXXX	LATM(1)PPM(1)VEGEGLASR	LATM(59.73)PPM(59.73)VEGEGLASR	4	2	-0.29415	6982000	0	6982000	0	NaN	0	NaN	4081700	NaN	2900300	NaN	0	0	0	0	4081700
G3N3N0;F1MQL2;G3N0C1	864;882;912	G3N3N0	G3N3N0	>tr|G3N3N0|G3N3N0_BOVIN Uncharacterized protein (Fragment) OS=Bos taurus GN=ANK2 PE=4 SV=1;>tr|F1MQL2|F1MQL2_BOVIN Uncharacterized protein (Fragment) OS=Bos taurus GN=ANK2 PE=4 SV=2;>tr|G3N0C1|G3N0C1_BOVIN Uncharacterized protein (Fragment) OS=Bos taurus G	1	59.7277	0.0121986	68.576	65.911	59.728					1	68.5765	0.0121986	68.576	1	59.7277	0.0276324	59.728		2	M	TCRLVKRHRLATMPPMVEGEGLASRLIEVGP	X;X;X;X;X;X;X;X;X;X;X;X;Oxidation (M);X;X;Oxidation (M);X;X;X;X;X;X;X;X;X;X;X;X;X;X;X	XXXXXXXXXPPPPPPPPPPPPPPPPXXXXXX	LATM(1)PPM(1)VEGEGLASR	LATM(59.73)PPM(59.73)VEGEGLASR	7	2	-0.29415	6982000	0	6982000	0	NaN	0	NaN	4081700	NaN	2900300	NaN	0	0	0	0	4081700
F1MRZ5;F1MRZ6	749;779	F1MRZ5	F1MRZ5	>tr|F1MRZ5|F1MRZ5_BOVIN Uncharacterized protein OS=Bos taurus GN=TNC PE=4 SV=1;>tr|F1MRZ6|F1MRZ6_BOVIN Uncharacterized protein (Fragment) OS=Bos taurus GN=TNC PE=4 SV=2	1	112.437	0.000418897	130.15	128.69	112.44	1	130.154	0.000616724	130.15	1	111.313	0.000418897	111.31	1	112.437	0.00147561	112.44		1	M	PLDIAFETWEVIFRNMNKDDEEEITKSLRRP	X;X;X;X;X;X;X;X;X;X;X;X;X;X;X;Oxidation (M);X;X;X;X;X;X;X;X;X;X;X;X;X;X;X	XXXXXXXXXXXXXXPPPPPPPPPPPPXXXXX	NM(1)NKDDEEEITK	NM(112.44)NKDDEEEITK	2	2	0.3711	10404000	10404000	0	0	NaN	5846900	NaN	2844700	NaN	1712200	NaN	5846900	0	0	2844700	0
F1MSQ6	138	F1MSQ6	F1MSQ6	>tr|F1MSQ6|F1MSQ6_BOVIN Uncharacterized protein (Fragment) OS=Bos taurus GN=NEFH PE=3 SV=2	1	104.014	0.0115577	119.75	104.54	104.01					1	119.747	0.0115577	119.75	1	104.014	0.0329529	104.01		1	M	GEAAALRQQQAGRAAMGELYEREVREMRGAV	X;X;X;X;X;X;X;X;X;X;X;X;X;X;X;Oxidation (M);X;X;X;X;X;X;X;X;X;X;X;X;X;X;X	XXXXXXXXXXXXXPPPPPPPPPXXXXXXXXX	AAM(1)GELYER	AAM(104.01)GELYER	3	2	0.61572	39075000	39075000	0	0	NaN	0	NaN	24744000	NaN	14331000	NaN	0	0	0	24744000	0
F1MSQ6	372	F1MSQ6	F1MSQ6	>tr|F1MSQ6|F1MSQ6_BOVIN Uncharacterized protein (Fragment) OS=Bos taurus GN=NEFH PE=3 SV=2	1	101.327	0.0493256	101.33	87.748	101.33	1	98.5231	0.0613112	98.523					1	101.327	0.0493256	101.33		1	M	AIQQLDAELRNTKWEMAAQLREYQDLLNVKM	X;X;X;X;X;X;X;X;X;X;X;X;X;X;X;Oxidation (M);X;X;X;X;X;X;X;X;X;X;X;X;X;X;Oxidation (M)	XXXXXXXXXXXXXPPPPPPPPXXXXXXXXXX	WEM(1)AAQLR	WEM(101.33)AAQLR	3	2	-1.1822	25440000	25440000	0	0	NaN	18536000	NaN	0	NaN	6904300	NaN	18536000	0	0	0	0
F1MYC9	1949	F1MYC9	F1MYC9	>tr|F1MYC9|F1MYC9_BOVIN Uncharacterized protein OS=Bos taurus GN=SPTBN1 PE=4 SV=1	1	204.347	9.51176E-13	204.35	196.43	204.35	1	188.4	2.36754E-12	188.4	1	204.347	9.51176E-13	204.35						1	M	EAQEKPRDVSSVELLMNNHQGIKAEIDARND	X;X;X;X;X;X;X;X;X;X;X;X;X;X;X;Oxidation (M);X;X;X;X;X;X;X;X;X;X;X;X;X;X;X	XXXXXXXPPPPPPPPPPPPPPPPXXXXXXXX	DVSSVELLM(1)NNHQGIK	DVSSVELLM(204.35)NNHQGIK	9	2	-2.2915	12123000	12123000	0	0	NaN	8752900	NaN	3370100	NaN	0	NaN	8752900	0	0	3370100	0
F1MYC9	1269	F1MYC9	F1MYC9	>tr|F1MYC9|F1MYC9_BOVIN Uncharacterized protein OS=Bos taurus GN=SPTBN1 PE=4 SV=1	1	98.0089	0.0577616	98.009	89.051	98.009									1	98.0089	0.0577616	98.009		1	M	DDRHRKNREAASELLMRLKDNRDLQKFLQDC	X;X;X;X;X;X;X;X;X;X;X;X;X;X;X;Oxidation (M);X;X;X;X;X;X;X;X;X;X;X;X;X;X;X	XXXXXXXXPPPPPPPPPXXXXXXXXXXXXXX	EAASELLM(1)R	EAASELLM(98.01)R	8	2	-0.88497	2063200	2063200	0	0	NaN	0	NaN	0	NaN	2063200	NaN	0	0	0	0	0
F1MYC9	1338	F1MYC9	F1MYC9	>tr|F1MYC9|F1MYC9_BOVIN Uncharacterized protein OS=Bos taurus GN=SPTBN1 PE=4 SV=1	1	84.6534	0.00600247	91.317	87.339	84.653	1	91.3172	0.00668601	91.317	1	84.6534	0.00600247	84.653						1	M	LASNKEWLDKIEKEGMQLISEKPETEAVVKE	X;X;X;X;X;X;X;X;X;X;X;X;X;X;X;Oxidation (M);X;X;X;X;X;X;X;X;X;X;X;X;X;X;X	XXXXXXXXXXXXXPPPPPPPPPPPPPPPPPX	EGM(1)QLISEKPETEAVVK	EGM(84.65)QLISEKPETEAVVK	3	2	-0.73625	16768000	16768000	0	0	NaN	11615000	NaN	5153100	NaN	0	NaN	11615000	0	0	5153100	0
F1MYC9	1734	F1MYC9	F1MYC9	>tr|F1MYC9|F1MYC9_BOVIN Uncharacterized protein OS=Bos taurus GN=SPTBN1 PE=4 SV=1	1	141.364	9.90764E-14	141.36	140.2	141.36					1	119.412	6.90996E-07	119.41	1	141.364	9.90764E-14	141.36		1	M	VAGSHELGQDYEHVTMLQERFREFARDTGNI	X;X;X;X;X;X;X;X;X;X;X;X;X;X;X;Oxidation (M);X;X;X;X;X;X;X;X;X;X;X;X;X;X;X	PPPPPPPPPPPPPPPPPPPPXXXXXXXXXXX	EVVAGSHELGQDYEHVTM(1)LQER	EVVAGSHELGQDYEHVTM(141.36)LQER	18	3	1.0453	24938000	24938000	0	0	NaN	0	NaN	16892000	NaN	8046700	NaN	0	0	0	16892000	0
F1MYC9	898	F1MYC9	F1MYC9	>tr|F1MYC9|F1MYC9_BOVIN Uncharacterized protein OS=Bos taurus GN=SPTBN1 PE=4 SV=1	1	148.52	3.46366E-07	148.52	145.2	148.52	1	69.0452	0.0502681	69.045	1	65.0384	0.0284401	65.038	1	148.52	3.46366E-07	148.52		1	M	DLEVIQHRFESLEPEMNNQASRVAVVNQIAR	X;X;X;X;X;X;X;X;X;X;X;X;X;X;X;Oxidation (M);X;X;X;X;X;X;X;X;X;X;X;X;X;X;X	XXXXXXXXPPPPPPPPPPPPPPXXXXXXXXX	FESLEPEM(1)NNQASR	FESLEPEM(148.52)NNQASR	8	2	-0.87772	18731000	18731000	0	0	NaN	10059000	NaN	4758400	NaN	3913200	NaN	10059000	0	0	4758400	0
F1MYC9	1468	F1MYC9	F1MYC9	>tr|F1MYC9|F1MYC9_BOVIN Uncharacterized protein OS=Bos taurus GN=SPTBN1 PE=4 SV=1	1	97.1627	0.0228971	97.163	86.216	97.163	1	97.1627	0.0228971	97.163										1	M	TDEVDSKRLTVQTKFMELLEPLNERKQNLLA	X;X;X;X;X;X;X;X;X;X;X;X;X;X;X;Oxidation (M);X;X;X;X;X;X;X;X;X;X;X;X;X;X;X	XXXXXXXXXXXXXXPPPPPPPPPPPXXXXXX	FM(1)ELLEPLNER	FM(97.16)ELLEPLNER	2	2	-2.0307	12947000	12947000	0	0	NaN	12947000	NaN	0	NaN	0	NaN	12947000	0	0	0	0
F1MYC9	526	F1MYC9	F1MYC9	>tr|F1MYC9|F1MYC9_BOVIN Uncharacterized protein OS=Bos taurus GN=SPTBN1 PE=4 SV=1	1	120.332	0.0110495	120.33	71.538	120.33	1	120.332	0.0110495	120.33										1	M	EYLLELLRARRQRLEMNLGLQKIFQEMLYIM	X;X;X;X;X;X;X;X;X;X;X;X;X;X;X;Oxidation (M);X;X;X;X;X;X;X;X;X;X;X;X;X;X;X	XXXXXXXXXXXXXPPPPPPPPPXXXXXXXXX	LEM(1)NLGLQK	LEM(120.33)NLGLQK	3	2	-0.58739	2920100	2920100	0	0	NaN	2920100	NaN	0	NaN	0	NaN	2920100	0	0	0	0
F1MYC9	1844	F1MYC9	F1MYC9	>tr|F1MYC9|F1MYC9_BOVIN Uncharacterized protein OS=Bos taurus GN=SPTBN1 PE=4 SV=1	1	126.633	6.9248E-06	126.63	125.22	126.63	1	97.9042	1.40468E-05	97.904	1	104.939	0.000115557	104.94	1	126.633	6.9248E-06	126.63		1	M	EELGRDQNTVETLQRMHTTFEHDIQALGTQV	X;X;X;X;X;X;X;X;X;X;X;X;X;X;X;Oxidation (M);X;X;X;X;X;X;X;X;X;X;X;X;X;X;X	XXXXXXXXXXXXXXXPPPPPPPPPPPPPPPP	M(1)HTTFEHDIQALGTQVR	M(126.63)HTTFEHDIQALGTQVR	1	3	1.1678	20877000	20877000	0	0	NaN	9841700	NaN	6239500	NaN	4796100	NaN	9841700	0	0	6239500	0
F1MYC9	1295	F1MYC9	F1MYC9	>tr|F1MYC9|F1MYC9_BOVIN Uncharacterized protein OS=Bos taurus GN=SPTBN1 PE=4 SV=1	1	58.2684	0.011686	70.68	70.114	58.268	1	64.5339	0.0218537	64.534	1	70.6796	0.011686	70.68	1	58.2684	0.0322198	58.268		2	M	FLQDCQELSLWINEKMLTAQDMSYDEARNLH	X;X;X;X;X;X;X;X;X;X;X;X;X;X;X;Oxidation (M);X;X;X;X;X;Oxidation (M);X;X;X;X;X;X;X;X;X	XXXXXXXXXXXXXXXPPPPPPPPPPPPPXXX	M(1)LTAQDM(1)SYDEAR	M(58.27)LTAQDM(58.27)SYDEAR	1	2	-2.0313	10743000	0	10743000	0	NaN	5477600	NaN	3117600	NaN	2147900	NaN	0	5477600	0	0	3117600
F1MYC9	1301	F1MYC9	F1MYC9	>tr|F1MYC9|F1MYC9_BOVIN Uncharacterized protein OS=Bos taurus GN=SPTBN1 PE=4 SV=1	1	58.2684	0.011686	70.68	70.114	58.268	1	64.5339	0.0218537	64.534	1	70.6796	0.011686	70.68	1	58.2684	0.0322198	58.268		2	M	ELSLWINEKMLTAQDMSYDEARNLHSKWLKH	X;X;X;X;X;X;X;X;X;Oxidation (M);X;X;X;X;X;Oxidation (M);X;X;X;X;X;X;X;X;X;X;X;X;X;X;X	XXXXXXXXXPPPPPPPPPPPPPXXXXXXXXX	M(1)LTAQDM(1)SYDEAR	M(58.27)LTAQDM(58.27)SYDEAR	7	2	-2.0313	10743000	0	10743000	0	NaN	5477600	NaN	3117600	NaN	2147900	NaN	0	5477600	0	0	3117600
F1MYC9	1505	F1MYC9	F1MYC9	>tr|F1MYC9|F1MYC9_BOVIN Uncharacterized protein OS=Bos taurus GN=SPTBN1 PE=4 SV=1	1	126.265	5.27469E-09	126.26	125.27	126.26	1	112.581	3.17108E-06	112.58	1	91.4144	0.00044528	91.414	1	126.265	5.27469E-09	126.26		1	M	FNRDVEDEILWVGERMPLATSTDHGHNLQTV	X;X;X;X;X;X;X;X;X;X;X;X;X;X;X;Oxidation (M);X;X;X;X;X;X;X;X;X;X;X;X;X;X;X	XXXXXXXXXXXXXXXPPPPPPPPPPPPPPPP	M(1)PLATSTDHGHNLQTVQLLIK	M(126.26)PLATSTDHGHNLQTVQLLIK	1	3	0.48736	56961000	56961000	0	0	NaN	26488000	NaN	15329000	NaN	15144000	NaN	26488000	0	0	15329000	0
F1MYC9	2199	F1MYC9	F1MYC9	>tr|F1MYC9|F1MYC9_BOVIN Uncharacterized protein OS=Bos taurus GN=SPTBN1 PE=4 SV=1	1	123.72	0.000177242	123.72	116.48	123.72	1	98.8953	0.00348629	98.895	1	104.082	0.00263663	104.08	1	123.72	0.000177242	123.72		1	M	AATLPARTQETPSAQMEGFLNRKHEWEAHNK	X;X;X;X;X;X;X;X;X;X;X;X;X;X;X;Oxidation (M);X;X;X;X;X;X;X;X;X;X;X;X;X;X;X	XXXXXXXPPPPPPPPPPPPPPPXXXXXXXXX	TQETPSAQM(1)EGFLNR	TQETPSAQM(123.72)EGFLNR	9	2	-0.84694	34342000	34342000	0	0	NaN	20081000	NaN	7892000	NaN	6369100	NaN	20081000	0	0	7892000	0
F1MYC9	1090	F1MYC9	F1MYC9	>tr|F1MYC9|F1MYC9_BOVIN Uncharacterized protein OS=Bos taurus GN=SPTBN1 PE=4 SV=1	1	97.6207	0.000471085	97.621	95.357	97.621									1	97.6207	0.000471085	97.621		1	M	QSWLSRTQTAIASEDMPNTLTEAEKLLTQHE	X;X;X;X;X;X;X;X;X;X;X;X;X;X;X;Oxidation (M);X;X;X;X;X;X;X;X;X;X;X;X;X;X;X	XXXXXXPPPPPPPPPPPPPPPPPPPXXXXXX	TQTAIASEDM(1)PNTLTEAEK	TQTAIASEDM(97.62)PNTLTEAEK	10	2	0.81391	11000000	11000000	0	0	NaN	0	NaN	0	NaN	11000000	NaN	0	0	0	0	0
F1MYC9	1760	F1MYC9	F1MYC9	>tr|F1MYC9|F1MYC9_BOVIN Uncharacterized protein OS=Bos taurus GN=SPTBN1 PE=4 SV=1	1	129.269	5.39124E-09	129.27	129.14	129.27	1	77.445	0.00453159	77.445	1	129.269	5.39124E-09	129.27						1	M	DTGNIGQERVDTVNHMADELINSGHSDAATI	X;X;X;X;X;X;X;X;X;X;X;X;X;X;X;Oxidation (M);X;X;X;X;X;X;X;X;X;X;X;X;X;X;X	XXXXXXXXXPPPPPPPPPPPPPPPPPPPPPP	VDTVNHM(1)ADELINSGHSDAATIAEWK	VDTVNHM(129.27)ADELINSGHSDAATIAEWK	7	3	-1.3525	17026000	17026000	0	0	NaN	8428400	NaN	8598000	NaN	0	NaN	8428400	0	0	8598000	0
F1MYC9;F1MKE9;E1BMN5	133;137;136	F1MYC9	F1MYC9	>tr|F1MYC9|F1MYC9_BOVIN Uncharacterized protein OS=Bos taurus GN=SPTBN1 PE=4 SV=1;>tr|F1MKE9|F1MKE9_BOVIN Uncharacterized protein (Fragment) OS=Bos taurus GN=SPTB PE=4 SV=2;>tr|E1BMN5|E1BMN5_BOVIN Uncharacterized protein OS=Bos taurus GN=SPTBN2 PE=4 SV=2	1	102.085	8.94719E-07	133.87	112.9	102.08	1	89.3114	8.94719E-07	133.87	1	107.825	0.000100249	107.82	1	102.085	0.000134989	102.08		1	M	KALQFLKEQRVHLENMGSHDIVDGNHRLTLG	X;X;X;X;X;X;X;X;X;X;X;X;X;X;X;Oxidation (M);X;X;X;X;X;X;X;X;X;X;X;X;X;X;X	XXXXXXXXXXPPPPPPPPPPPPPPPPPXXXX	VHLENM(1)GSHDIVDGNHR	VHLENM(102.08)GSHDIVDGNHR	6	3	0.93119	23180000	23180000	0	0	NaN	8148300	NaN	3056900	NaN	2583400	NaN	8148300	0	0	3056900	0
F1N1S2	2414	F1N1S2	F1N1S2	>tr|F1N1S2|F1N1S2_BOVIN Uncharacterized protein OS=Bos taurus GN=MAP1B PE=4 SV=2	1	49.1878	0.0306548	49.188	47.961	49.188	1	42.6394	0.0443466	42.639					1	49.1878	0.0306548	49.188		2	M	VLDALLEGKAQWGSNMQVTLIPTHDSEVMRE	X;X;X;X;X;X;X;X;X;X;X;X;X;X;X;Oxidation (M);X;X;X;X;X;X;X;X;X;X;X;X;Oxidation (M);X;X	XXXXXXXXXPPPPPPPPPPPPPPPPPPPPPX	AQWGSNM(1)QVTLIPTHDSEVM(1)R	AQWGSNM(49.19)QVTLIPTHDSEVM(49.19)R	7	3	0.96565	80691000	0	80691000	0	NaN	57015000	NaN	0	NaN	23676000	NaN	0	57015000	0	0	0
F1N1S2	2427	F1N1S2	F1N1S2	>tr|F1N1S2|F1N1S2_BOVIN Uncharacterized protein OS=Bos taurus GN=MAP1B PE=4 SV=2	1	49.1878	0.0306548	49.188	47.961	49.188	1	42.6394	0.0443466	42.639					1	49.1878	0.0306548	49.188		2	M	SNMQVTLIPTHDSEVMREWYQETHEKQQDLN	X;X;Oxidation (M);X;X;X;X;X;X;X;X;X;X;X;X;Oxidation (M);X;X;X;X;X;X;X;X;X;X;X;X;X;X;X	PPPPPPPPPPPPPPPPPXXXXXXXXXXXXXX	AQWGSNM(1)QVTLIPTHDSEVM(1)R	AQWGSNM(49.19)QVTLIPTHDSEVM(49.19)R	20	3	0.96565	80691000	0	80691000	0	NaN	57015000	NaN	0	NaN	23676000	NaN	0	57015000	0	0	0
F1N1S2	1374	F1N1S2	F1N1S2	>tr|F1N1S2|F1N1S2_BOVIN Uncharacterized protein OS=Bos taurus GN=MAP1B PE=4 SV=2	1	97.2709	0.00271773	97.271	66.696	97.271					1	91.5895	0.00271773	91.589	1	97.2709	0.00295031	97.271		1	M	FSDAKDESERASISPMDEPVPDSESPIEKVL	X;X;X;X;X;X;X;X;X;X;X;X;X;X;X;Oxidation (M);X;X;X;X;X;X;X;X;X;X;X;X;X;X;X	XXXXXXXXXXPPPPPPPPPPPPPPPPPPPXX	ASISPM(1)DEPVPDSESPIEK	ASISPM(97.27)DEPVPDSESPIEK	6	2	0.60659	21093000	21093000	0	0	NaN	0	NaN	12462000	NaN	8630300	NaN	0	0	0	12462000	0
F1N1S2	1831	F1N1S2	F1N1S2	>tr|F1N1S2|F1N1S2_BOVIN Uncharacterized protein OS=Bos taurus GN=MAP1B PE=4 SV=2	1	86.4967	0.0023408	86.497	82.276	86.497	1	49.5946	0.0345696	49.595	1	82.5294	0.00346191	82.529	1	86.4967	0.0023408	86.497		2	M	PMDAASAEPYGFRASMLFDTMPHHLALNRDL	X;X;X;X;X;X;X;X;X;X;X;X;X;X;X;Oxidation (M);X;X;X;X;Oxidation (M);X;X;X;X;X;X;X;X;X;X	XXXXXXXXXXXXXPPPPPPPPPPPPPPPPXX	ASM(1)LFDTM(1)PHHLALNR	ASM(86.5)LFDTM(86.5)PHHLALNR	3	3	4.0008	64879000	0	64879000	0	NaN	36783000	NaN	17587000	NaN	10510000	NaN	0	36783000	0	0	17587000
F1N1S2	1836	F1N1S2	F1N1S2	>tr|F1N1S2|F1N1S2_BOVIN Uncharacterized protein OS=Bos taurus GN=MAP1B PE=4 SV=2	1	86.4967	0.0023408	86.497	82.276	86.497	1	49.5946	0.0345696	49.595	1	82.5294	0.00346191	82.529	1	86.4967	0.0023408	86.497		2	M	SAEPYGFRASMLFDTMPHHLALNRDLTTPGM	X;X;X;X;X;X;X;X;X;X;Oxidation (M);X;X;X;X;Oxidation (M);X;X;X;X;X;X;X;X;X;X;X;X;X;X;X	XXXXXXXXPPPPPPPPPPPPPPPPXXXXXXX	ASM(1)LFDTM(1)PHHLALNR	ASM(86.5)LFDTM(86.5)PHHLALNR	8	3	4.0008	64879000	0	64879000	0	NaN	36783000	NaN	17587000	NaN	10510000	NaN	0	36783000	0	0	17587000
F1N1S2	434	F1N1S2	F1N1S2	>tr|F1N1S2|F1N1S2_BOVIN Uncharacterized protein OS=Bos taurus GN=MAP1B PE=4 SV=2	1	69.2576	0.0059272	69.258	68.188	69.258					1	53.3001	0.0304422	53.3	1	69.2576	0.0059272	69.258		2	M	KLEMYVLNPVKSSKEMQYFMQQWTGTNKDKA	X;X;X;Oxidation (M);X;X;X;X;X;X;X;X;X;X;X;Oxidation (M);X;X;X;Oxidation (M);X;X;X;X;X;X;X;X;X;X;X	XXXXXXXXXXXXXXPPPPPPPPPPPPPPXXX	EM(1)QYFM(1)QQWTGTNK	EM(69.26)QYFM(69.26)QQWTGTNK	2	2	-1.9509	12280000	0	12280000	0	NaN	0	NaN	6896200	NaN	5384300	NaN	0	0	0	0	6896200
F1N1S2	438	F1N1S2	F1N1S2	>tr|F1N1S2|F1N1S2_BOVIN Uncharacterized protein OS=Bos taurus GN=MAP1B PE=4 SV=2	1	69.2576	0.0059272	69.258	68.188	69.258					1	53.3001	0.0304422	53.3	1	69.2576	0.0059272	69.258		2	M	YVLNPVKSSKEMQYFMQQWTGTNKDKAELIL	X;X;X;X;X;X;X;X;X;X;X;Oxidation (M);X;X;X;Oxidation (M);X;X;X;X;X;X;X;X;X;X;X;X;X;X;X	XXXXXXXXXXPPPPPPPPPPPPPPXXXXXXX	EM(1)QYFM(1)QQWTGTNK	EM(69.26)QYFM(69.26)QQWTGTNK	6	2	-1.9509	12280000	0	12280000	0	NaN	0	NaN	6896200	NaN	5384300	NaN	0	0	0	0	6896200
F1N1S2	323	F1N1S2	F1N1S2	>tr|F1N1S2|F1N1S2_BOVIN Uncharacterized protein OS=Bos taurus GN=MAP1B PE=4 SV=2	1	69.5776	0.000189395	109.23	106.67	69.578	1	108.435	0.00136814	108.44	1	109.227	0.000189395	109.23	1	69.5776	0.0346695	69.578		1	M	LLTHIGDDNLPGINSMLQRKIAELEEEQSQG	X;X;X;X;X;X;X;X;X;X;X;X;X;X;X;Oxidation (M);X;X;X;X;X;X;X;X;X;X;X;X;X;X;X	PPPPPPPPPPPPPPPPPPPXXXXXXXXXXXX	HLDRVDSILLTHIGDDNLPGINSM(1)LQR	HLDRVDSILLTHIGDDNLPGINSM(69.58)LQR	24	3	0.22056	48695000	48695000	0	0	NaN	26852000	NaN	11775000	NaN	10067000	NaN	26852000	0	0	11775000	0
F1N1S2	2193	F1N1S2	F1N1S2	>tr|F1N1S2|F1N1S2_BOVIN Uncharacterized protein OS=Bos taurus GN=MAP1B PE=4 SV=2	1	80.8706	0.0055322	80.871	79.099	80.871	1	77.6744	0.00615039	77.674	1	74.3925	0.0055322	74.392	1	80.8706	0.00761095	80.871		2	M	ESETIPTDKTVTYKHMDPPPAPMQDRSPSPR	X;X;X;X;X;X;X;X;X;X;X;X;X;X;X;Oxidation (M);X;X;X;X;X;X;Oxidation (M);X;X;X;X;X;X;X;X	XXXXXXXXXXXXXXPPPPPPPPPPPPXXXXX	HM(1)DPPPAPM(1)QDR	HM(80.87)DPPPAPM(80.87)QDR	2	2	0.15313	10447000	0	10447000	0	NaN	5785800	NaN	2960000	NaN	1701200	NaN	0	5785800	0	0	2960000
F1N1S2	2200	F1N1S2	F1N1S2	>tr|F1N1S2|F1N1S2_BOVIN Uncharacterized protein OS=Bos taurus GN=MAP1B PE=4 SV=2	1	80.8706	0.0055322	80.871	79.099	80.871	1	77.6744	0.00615039	77.674	1	74.3925	0.0055322	74.392	1	80.8706	0.00761095	80.871		2	M	DKTVTYKHMDPPPAPMQDRSPSPRHPDVSMM	X;X;X;X;X;X;X;X;Oxidation (M);X;X;X;X;X;X;Oxidation (M);X;X;X;X;X;X;X;X;X;X;X;X;X;X;X	XXXXXXXPPPPPPPPPPPPXXXXXXXXXXXX	HM(1)DPPPAPM(1)QDR	HM(80.87)DPPPAPM(80.87)QDR	9	2	0.15313	10447000	0	10447000	0	NaN	5785800	NaN	2960000	NaN	1701200	NaN	0	5785800	0	0	2960000
F1N1S2	1478	F1N1S2	F1N1S2	>tr|F1N1S2|F1N1S2_BOVIN Uncharacterized protein OS=Bos taurus GN=MAP1B PE=4 SV=2	1	149.708	1.00165E-08	149.71	147.6	149.71	1	90.4533	0.00010033	114.46	1	149.326	1.00165E-08	149.33	1	149.708	1.15135E-08	149.71		1	M	KEDFGQEKKTDDVEDMSSQAGLTLDERKLGG	X;X;X;X;X;X;X;X;X;X;X;X;X;X;X;Oxidation (M);X;X;X;X;X;X;X;X;X;X;X;X;X;X;X	XXXXXXXXPPPPPPPPPPPPPPPPPPPXXXX	KTDDVEDM(1)SSQAGLTLDER	KTDDVEDM(149.71)SSQAGLTLDER	8	2	0.18432	83858000	83858000	0	0	NaN	23410000	NaN	9615000	NaN	8270000	NaN	23410000	0	0	9615000	0
F1N1S2	422	F1N1S2	F1N1S2	>tr|F1N1S2|F1N1S2_BOVIN Uncharacterized protein OS=Bos taurus GN=MAP1B PE=4 SV=2	1	97.5967	0.0395637	97.597	87.048	97.597	1	54.5394	0.0449821	54.539	1	97.5967	0.0395637	97.597						1	M	DPVILFQKMGVGKLEMYVLNPVKSSKEMQYF	X;X;X;X;X;X;X;X;X;X;X;X;X;X;X;Oxidation (M);X;X;X;X;X;X;X;X;X;X;X;Oxidation (M);X;X;X	XXXXXXXXXXXXXPPPPPPPPPPXXXXXXXX	LEM(1)YVLNPVK	LEM(97.6)YVLNPVK	3	2	0.164	4341800	4341800	0	0	NaN	0	NaN	4341800	NaN	0	NaN	0	0	0	4341800	0
F1N1S2	393	F1N1S2	F1N1S2	>tr|F1N1S2|F1N1S2_BOVIN Uncharacterized protein OS=Bos taurus GN=MAP1B PE=4 SV=2	1	79.2014	0.0333344	82.261	65.093	79.201	1	82.2607	0.0333344	82.261	1	79.2014	0.0375113	79.201	1	79.2014	0.0375113	79.201		1	M	IEEACFTLQYLNKLSMKPEPLFRSVGNTIDP	X;X;X;X;X;X;X;X;X;X;X;X;X;X;X;Oxidation (M);X;X;X;X;X;X;X;X;X;X;X;X;X;X;X	XXXXXXXXXXXXXPPPPPPPPPPXXXXXXXX	LSM(1)KPEPLFR	LSM(79.2)KPEPLFR	3	3	-0.15865	48127000	48127000	0	0	NaN	30436000	NaN	12483000	NaN	5207500	NaN	30436000	0	0	12483000	0
F1N3M8;G3MYP5	1091;943	F1N3M8;G3MYP5	G3MYP5	>tr|F1N3M8|F1N3M8_BOVIN Uncharacterized protein (Fragment) OS=Bos taurus GN=MAP1A PE=4 SV=2;>tr|G3MYP5|G3MYP5_BOVIN Uncharacterized protein OS=Bos taurus GN=MAP1A PE=4 SV=1	1	72.359	0.0496345	72.359	66.396	72.359	1	72.359	0.0496345	72.359										1	M	RALEGEEEEETANVQMSEKLHGQYGPPMFAA	X;X;X;X;X;X;X;X;X;X;X;X;X;X;X;Oxidation (M);X;X;X;X;X;X;X;X;X;X;X;Oxidation (M);X;X;X	XPPPPPPPPPPPPPPPPPPXXXXXXXXXXXX	ALEGEEEEETANVQM(1)SEK	ALEGEEEEETANVQM(72.36)SEK	15	2	-0.28151	108760000	108760000	0	0	NaN	108760000	NaN	0	NaN	0	NaN	108760000	0	0	0	0
F1N3M8;G3MYP5	1648;1599	F1N3M8;G3MYP5	G3MYP5	>tr|F1N3M8|F1N3M8_BOVIN Uncharacterized protein (Fragment) OS=Bos taurus GN=MAP1A PE=4 SV=2;>tr|G3MYP5|G3MYP5_BOVIN Uncharacterized protein OS=Bos taurus GN=MAP1A PE=4 SV=1	1	103.901	0.00682602	103.9	103.02	103.9	1	99.3131	0.00682602	99.313	1	86.8899	0.0172116	86.89	1	103.901	0.00875756	103.9		1	M	DKTQEQESPVQEDKTMAPKEKILEEKSPEKV	X;X;X;X;X;X;X;X;X;X;X;X;X;X;X;Oxidation (M);X;X;X;X;X;X;X;X;X;X;X;X;X;X;X	PPPPPPPPPPPPPPPPPPPXXXXXXXXXXXX	DKTQEQESPVQEDKTM(1)APK	DKTQEQESPVQEDKTM(103.9)APK	16	3	-0.44229	45055000	45055000	0	0	NaN	23517000	NaN	13048000	NaN	8490400	NaN	23517000	0	0	13048000	0
F1N3M8;G3MYP5	397;212	F1N3M8;G3MYP5	G3MYP5	>tr|F1N3M8|F1N3M8_BOVIN Uncharacterized protein (Fragment) OS=Bos taurus GN=MAP1A PE=4 SV=2;>tr|G3MYP5|G3MYP5_BOVIN Uncharacterized protein OS=Bos taurus GN=MAP1A PE=4 SV=1	1	63.2101	0.0319239	71.342	50.717	63.21	1	71.3424	0.0319239	71.342	1	68.7868	0.0350639	68.787	1	63.2101	0.041916	63.21		2	M	RLDMYVLNPVKDSKEMQFLMQKWAGNSKAKT	X;X;X;Oxidation (M);X;X;X;X;X;X;X;X;X;X;X;Oxidation (M);X;X;X;Oxidation (M);X;X;X;X;X;X;X;X;X;X;X	XXXXXXXXXXXXXXPPPPPPPPXXXXXXXXX	EM(1)QFLM(1)QK	EM(63.21)QFLM(63.21)QK	2	2	-0.51283	57218000	0	57218000	0	NaN	28580000	NaN	16730000	NaN	11908000	NaN	0	28580000	0	0	16730000
F1N3M8;G3MYP5	401;216	F1N3M8;G3MYP5	G3MYP5	>tr|F1N3M8|F1N3M8_BOVIN Uncharacterized protein (Fragment) OS=Bos taurus GN=MAP1A PE=4 SV=2;>tr|G3MYP5|G3MYP5_BOVIN Uncharacterized protein OS=Bos taurus GN=MAP1A PE=4 SV=1	1	63.2101	0.0319239	71.342	50.717	63.21	1	71.3424	0.0319239	71.342	1	68.7868	0.0350639	68.787	1	63.2101	0.041916	63.21		2	M	YVLNPVKDSKEMQFLMQKWAGNSKAKTGIVL	X;X;X;X;X;X;X;X;X;X;X;Oxidation (M);X;X;X;Oxidation (M);X;X;X;X;X;X;X;X;X;X;X;X;X;X;X	XXXXXXXXXXPPPPPPPPXXXXXXXXXXXXX	EM(1)QFLM(1)QK	EM(63.21)QFLM(63.21)QK	6	2	-0.51283	57218000	0	57218000	0	NaN	28580000	NaN	16730000	NaN	11908000	NaN	0	28580000	0	0	16730000
F1N3M8;G3MYP5	385;200	F1N3M8;G3MYP5	G3MYP5	>tr|F1N3M8|F1N3M8_BOVIN Uncharacterized protein (Fragment) OS=Bos taurus GN=MAP1A PE=4 SV=2;>tr|G3MYP5|G3MYP5_BOVIN Uncharacterized protein OS=Bos taurus GN=MAP1A PE=4 SV=1	1	126.086	3.09912E-05	152.16	142.02	126.09	1	152.163	3.09912E-05	152.16	1	150.216	3.38514E-05	150.22	1	126.086	0.00070271	126.09		1	M	EPLTLFHKMGVGRLDMYVLNPVKDSKEMQFL	X;X;X;X;X;X;X;X;X;X;X;X;X;X;X;Oxidation (M);X;X;X;X;X;X;X;X;X;X;X;Oxidation (M);X;X;X	XXXXXXXXXXXXXPPPPPPPPPPPPPXXXXX	LDM(1)YVLNPVKDSK	LDM(126.09)YVLNPVKDSK	3	2	-0.31509	178320000	178320000	0	0	NaN	40758000	NaN	15237000	NaN	8295700	NaN	40758000	0	0	15237000	0
F1N3M8;G3MYP5	1103;955	F1N3M8;G3MYP5	G3MYP5	>tr|F1N3M8|F1N3M8_BOVIN Uncharacterized protein (Fragment) OS=Bos taurus GN=MAP1A PE=4 SV=2;>tr|G3MYP5|G3MYP5_BOVIN Uncharacterized protein OS=Bos taurus GN=MAP1A PE=4 SV=1	1	54.1669	6.00908E-07	113.15	113.07	54.167	1	58.8579	0.00017439	107.24	1	55.2599	6.00908E-07	113.15	1	54.1669	0.000450095	112.8		1	M	NVQMSEKLHGQYGPPMFAAPGHALHPGEPAL	X;X;X;Oxidation (M);X;X;X;X;X;X;X;X;X;X;X;Oxidation (M);X;X;X;X;X;X;X;X;X;X;X;X;X;X;X	XXXXXXXPPPPPPPPPPPPPPPPPPPPPPPP	LHGQYGPPM(1)FAAPGHALHPGEPALGEAEER	LHGQYGPPM(54.17)FAAPGHALHPGEPALGEAEER	9	5	-0.41579	203500000	203500000	0	0	NaN	17767000	NaN	14644000	NaN	13614000	NaN	17767000	0	0	14644000	0
F1N3M8;G3MYP5	1135;987	F1N3M8;G3MYP5	G3MYP5	>tr|F1N3M8|F1N3M8_BOVIN Uncharacterized protein (Fragment) OS=Bos taurus GN=MAP1A PE=4 SV=2;>tr|G3MYP5|G3MYP5_BOVIN Uncharacterized protein OS=Bos taurus GN=MAP1A PE=4 SV=1	1	90.9116	0.00204529	90.912	89.093	90.912	1	62.7808	0.0179911	62.781	1	76.889	0.00640937	76.889	1	90.9116	0.00204529	90.912		1	M	EAEERCLSPDDSTVKMASPPPSGPPSATHTP	X;X;X;X;X;X;X;X;X;X;X;X;X;X;X;Oxidation (M);X;X;X;X;X;X;X;X;X;X;X;X;X;X;X	XXXXXXXXXXXXXXXPPPPPPPPPPPPPPPP	M(1)ASPPPSGPPSATHTPFHQSPVEEK	M(90.91)ASPPPSGPPSATHTPFHQSPVEEK	1	3	0.21865	32787000	32787000	0	0	NaN	8523100	NaN	4690900	NaN	3403400	NaN	8523100	0	0	4690900	0
F1N3M8;G3MYP5	2107;2669	F1N3M8;G3MYP5	G3MYP5	>tr|F1N3M8|F1N3M8_BOVIN Uncharacterized protein (Fragment) OS=Bos taurus GN=MAP1A PE=4 SV=2;>tr|G3MYP5|G3MYP5_BOVIN Uncharacterized protein OS=Bos taurus GN=MAP1A PE=4 SV=1	1	63.0443	0.0313179	65.598	63.375	63.044	1	59.9754	0.0313179	65.598	1	61.8616	0.0428839	61.862	1	63.0443	0.0413074	63.044		1	M	PSQVTPAEEKDGHSPMSKGLVNGLKAGPTAL	X;X;X;X;X;X;X;X;X;X;X;X;X;X;X;Oxidation (M);X;X;X;X;X;X;X;X;X;X;X;X;X;X;X	PPPPPPPPPPPPPPPPPPXXXXXXXXXXXXX	STPSQVTPAEEKDGHSPM(1)SK	STPSQVTPAEEKDGHSPM(63.04)SK	18	3	0.54219	91140000	91140000	0	0	NaN	48498000	NaN	21728000	NaN	13408000	NaN	48498000	0	0	21728000	0
F1N690	103	F1N690	F1N690	>tr|F1N690|F1N690_BOVIN Acetyltransferase component of pyruvate dehydrogenase complex OS=Bos taurus GN=DLAT PE=3 SV=1	1	110.316	0.000114364	110.32	102.4	110.32	1	77.1295	0.0455069	77.13	1	107.699	0.000114364	107.7	1	110.316	0.000132876	110.32		1	M	LPPHQKVPLPSLSPTMQAGTIARWEKKEGEK	X;X;X;X;X;X;X;X;X;X;X;X;X;X;X;Oxidation (M);X;X;X;X;X;X;X;X;X;X;X;X;X;X;X	XXXXXXPPPPPPPPPPPPPPPPPXXXXXXXX	VPLPSLSPTM(1)QAGTIAR	VPLPSLSPTM(110.32)QAGTIAR	10	2	-0.55807	30236000	30236000	0	0	NaN	16431000	NaN	7964400	NaN	5840200	NaN	16431000	0	0	7964400	0
F6RAG5	676	F6RAG5	F6RAG5	>tr|F6RAG5|F6RAG5_BOVIN Uncharacterized protein OS=Bos taurus GN=KIF5C PE=4 SV=1	1	150.39	1.09455E-05	150.39	147.06	150.39	1	150.39	1.09455E-05	150.39										1	M	DSLSEELAKLRAQEKMHEVSFQDKEKEHLTR	X;X;X;X;X;X;X;X;X;X;X;X;X;X;X;Oxidation (M);X;X;X;X;X;X;X;X;X;X;X;X;X;X;X	XXXXXXXXXXXXXXXPPPPPPPPPPPPPPPP	M(1)HEVSFQDKEKEHLTR	M(150.39)HEVSFQDKEKEHLTR	1	4	-0.045997	2936100	2936100	0	0	NaN	2936100	NaN	0	NaN	0	NaN	2936100	0	0	0	0
G3MYP5	1836	G3MYP5	G3MYP5	>tr|G3MYP5|G3MYP5_BOVIN Uncharacterized protein OS=Bos taurus GN=MAP1A PE=4 SV=1	1	61.4803	0.0267108	72.817	61.87	61.48					1	69.2612	0.046278	69.261	1	61.4803	0.0267108	72.817		1	M	PGQESPIPDPKLLPPMRDEPTTRSWLADIPP	X;X;X;X;X;X;X;X;X;X;X;X;X;X;X;Oxidation (M);X;X;X;X;X;X;X;X;X;X;X;X;X;X;X	XXXXXXXXXXXPPPPPPPPPPPPXXXXXXXX	LLPPM(1)RDEPTTR	LLPPM(61.48)RDEPTTR	5	2	-1.0285	8774700	8774700	0	0	NaN	0	NaN	2111600	NaN	1990000	NaN	0	0	0	2111600	0
G3MYP5	1334	G3MYP5	G3MYP5	>tr|G3MYP5|G3MYP5_BOVIN Uncharacterized protein OS=Bos taurus GN=MAP1A PE=4 SV=1	1	89.6627	5.15217E-05	104.84	103.43	89.663	1	84.6891	0.0022081	95.5	1	58.4793	5.15217E-05	104.84	1	89.6627	0.00190672	96.379		1	M	KSPESLPSPAVEDIVMEWEGKVPKLKDRPPE	X;X;X;X;X;X;X;X;X;X;X;X;X;X;X;Oxidation (M);X;X;X;X;X;X;X;X;X;X;X;X;X;X;X	XPPPPPPPPPPPPPPPPPPPPPPPXXXXXXX	SPESLPSPAVEDIVM(1)EWEGKVPK	SPESLPSPAVEDIVM(89.66)EWEGKVPK	15	3	0.4234	31577000	31577000	0	0	NaN	7140000	NaN	3233200	NaN	3037800	NaN	7140000	0	0	3233200	0
P04975;G3N252	219;233	P04975	P04975	>sp|P04975|CLCB_BOVIN Clathrin light chain B OS=Bos taurus GN=CLTB PE=1 SV=1;>tr|G3N252|G3N252_BOVIN Clathrin light chain B OS=Bos taurus GN=CLTB PE=4 SV=1	1	71.1336	0.0196529	73.616	16.726	71.134	1	73.6163	0.0196529	73.616	1	68.0807	0.0318694	68.081	1	71.1336	0.0253611	71.134			M	SSKQCKDVSRLRSVLMSLKQTPLSR______	X;X;X;X;X;X;X;X;X;X;X;X;X;X;X;Oxidation (M);X;X;X;X;X;X;X;X;X;X;X;X;X;X;X	XXXXXXXXXXXXPPPPPPPXXXXXXXXXXXX	SVLM(1)SLK	SVLM(71.13)SLK	4	1	-1.7895	322520000	322520000	0	0	16.071	188400000	NaN	79088000	7.0381	55036000	6.2319	188400000	0	0	79088000	0
P04975;G3N252	123;123	P04975	P04975	>sp|P04975|CLCB_BOVIN Clathrin light chain B OS=Bos taurus GN=CLTB PE=1 SV=1;>tr|G3N252|G3N252_BOVIN Clathrin light chain B OS=Bos taurus GN=CLTB PE=4 SV=1	1	140.117	0.0114814	140.12	96.903	140.12	1	132.094	0.0134247	132.09	1	131.037	0.0136919	131.04	1	140.117	0.0114814	140.12		1	M	EQRKRLQELDAASKVMEQEWREKAKKDLEEW	Deamidation (NQ);X;X;X;X;X;X;X;X;X;X;X;X;X;X;Oxidation (M);X;X;X;X;X;X;X;X;X;X;X;X;X;X;X	XXXXXXXXXXXXXXPPPPPPPXXXXXXXXXX	VM(1)EQEWR	VM(140.12)EQEWR	2	2	0.30355	1261500000	1261500000	0	0	81.561	641480000	78.85	346650000	77.814	273330000	95.036	641480000	0	0	346650000	0
P00760	109	P00760	P00760	>sp|P00760|TRY1_BOVIN Cationic trypsin OS=Bos taurus PE=1 SV=3	1	117.478	2.07964E-05	117.48	114.73	117.48	1	103.413	3.36415E-05	103.41	1	103.734	0.000244315	103.73	1	117.478	2.07964E-05	117.48		1	M	IVHPSYNSNTLNNDIMLIKLKSAASLNSRVA	X;X;X;X;X;X;X;X;X;X;X;X;X;X;X;Oxidation (M);X;X;X;X;X;X;X;X;X;X;Deamidation (NQ);X;X;X;X	PPPPPPPPPPPPPPPPPPPXXXXXXXXXXXX	SIVHPSYNSNTLNNDIM(1)LIK	SIVHPSYNSNTLNNDIM(117.48)LIK	17	2	-1.0489	172940000	172940000	0	0	0.16309	24755000	0.052016	11326000	0.036878	10301000	0.03714	24755000	0	0	11326000	0
P02548	217	P02548	P02548	>sp|P02548|NFL_BOVIN Neurofilament light polypeptide OS=Bos taurus GN=NEFL PE=1 SV=3	1	79.6515	2.86618E-05	142.83	136.14	79.652	1	76.3575	0.000517178	120.57	1	74.8534	2.86618E-05	142.83	1	79.6515	3.36365E-05	139.46		1	M	AALARAELEKRIDSLMDEIAFLKKVHEEEIA	X;X;X;X;X;X;X;X;X;X;X;X;X;X;X;Oxidation (M);X;X;X;X;X;X;X;X;X;X;X;X;X;X;X	XXXXXXXXXXPPPPPPPPPPPPPPXXXXXXX	RIDSLM(1)DEIAFLKK	RIDSLM(79.65)DEIAFLKK	6	3	-0.34186	315890000	315890000	0	0	NaN	37797000	NaN	21521000	NaN	17567000	NaN	37797000	0	0	21521000	0
P02548	247	P02548	P02548	>sp|P02548|NFL_BOVIN Neurofilament light polypeptide OS=Bos taurus GN=NEFL PE=1 SV=3	1	72.3892	0.062118	72.389	72.361	72.389	1	62.0202	0.062118	62.02					1	72.3892	0.0623724	72.389		1	M	AELQAQIQYAQISVEMDVSSKPDLSAALKDI	X;X;X;X;X;X;X;X;X;X;X;X;X;X;X;Oxidation (M);X;X;X;X;X;X;X;X;X;X;X;X;X;X;X	PPPPPPPPPPPPPPPPPPPPPPPPPPPPPXX	KVHEEEIAELQAQIQYAQISVEM(1)DVSSKPDLSAALK	KVHEEEIAELQAQIQYAQISVEM(72.39)DVSSKPDLSAALK	23	3	-0.28823	96912000	96912000	0	0	NaN	64597000	NaN	0	NaN	32315000	NaN	64597000	0	0	0	0
P02548	274	P02548	P02548	>sp|P02548|NFL_BOVIN Neurofilament light polypeptide OS=Bos taurus GN=NEFL PE=1 SV=3	1	48.284	0.0042259	123.96	112.04	48.284	1	123.957	0.0042259	123.96					1	48.284	0.0158004	107.55		1	M	LKDIRAQYEKLAAKNMQNAEEWFKSRFTVLT	X;X;X;X;X;X;X;X;X;X;X;X;X;X;Deamidation (NQ);Oxidation (M);X;X;X;X;X;X;X;X;X;X;X;X;X;X;X	XXXXXXXXXXXXXXPPPPPPPPPPXXXXXXX	NM(1)QNAEEWFK	NM(48.28)QNAEEWFK	2	2	0.71884	200140000	200140000	0	0	NaN	144510000	NaN	0	NaN	54078000	NaN	144510000	0	0	0	0
P02548	348	P02548	P02548	>sp|P02548|NFL_BOVIN Neurofilament light polypeptide OS=Bos taurus GN=NEFL PE=1 SV=3	1	130.359	5.76381E-08	159.46	159.04	130.36	1	99.0922	0.000575086	99.092	1	103.901	5.76381E-08	159.46	1	130.359	5.81232E-08	159.36		1	M	QLQELEDKQNADISAMQDTINKLENELRTTK	X;X;X;X;X;X;X;X;X;X;X;X;X;X;X;Oxidation (M);X;X;X;X;X;X;X;X;X;X;X;X;X;X;X	PPPPPPPPPPPPPPPPPPPPPPPPPPPPXXX	QNADISAM(1)QDTINKLENELR	QNADISAM(130.36)QDTINKLENELR	8	2	-0.62934	212370000	212370000	0	0	8.4128	24327000	1.7726	11101000	2.2725	9477500	1.4283	24327000	0	0	11101000	0
P02548	435	P02548	P02548	>sp|P02548|NFL_BOVIN Neurofilament light polypeptide OS=Bos taurus GN=NEFL PE=1 SV=3	1	117.069	0.00185108	117.07	114.04	117.07	1	86.3665	0.0128274	86.367	1	84.4031	0.0239812	84.403	1	117.069	0.00185108	117.07		1	M	FGRSAYGGLQTSSYLMSARSFPSYYTSHVQE	X;X;X;X;X;X;X;X;X;X;X;X;X;X;X;Oxidation (M);X;X;X;X;X;X;X;X;X;X;X;X;X;X;X	XXXPPPPPPPPPPPPPPPPXXXXXXXXXXXX	SAYGGLQTSSYLM(1)SAR	SAYGGLQTSSYLM(117.07)SAR	13	2	-0.33534	464450000	464450000	0	0	153.98	228170000	NaN	128960000	NaN	107310000	35.579	228170000	0	0	128960000	0
P11179;F1MEQ3	340;341	P11179	P11179	>sp|P11179|ODO2_BOVIN Dihydrolipoyllysine-residue succinyltransferase component of 2-oxoglutarate dehydrogenase complex, mitochondrial OS=Bos taurus GN=DLST PE=1 SV=2;>tr|F1MEQ3|F1MEQ3_BOVIN Dihydrolipoyllysine-residue succinyltransferase component of 2-ox	1	119.213	0.000322115	121.01	108.75	119.21	1	92.2953	0.0252464	92.295	1	121.013	0.000322115	121.01	1	119.213	0.00313474	119.21		1	M	TPRGLVVPVIRNVETMNYADIERTISELGEK	X;X;X;X;X;X;X;X;X;X;X;X;X;X;X;Oxidation (M);X;X;X;X;X;X;X;X;X;X;X;X;X;X;X	XXXXXXXXXXXPPPPPPPPPPPPXXXXXXXX	NVETM(1)NYADIER	NVETM(119.21)NYADIER	5	2	-0.48298	17743000	17743000	0	0	NaN	7600200	NaN	4636600	NaN	5506600	NaN	7600200	0	0	4636600	0
P11179;F1MEQ3	417;418	P11179	P11179	>sp|P11179|ODO2_BOVIN Dihydrolipoyllysine-residue succinyltransferase component of 2-oxoglutarate dehydrogenase complex, mitochondrial OS=Bos taurus GN=DLST PE=1 SV=2;>tr|F1MEQ3|F1MEQ3_BOVIN Dihydrolipoyllysine-residue succinyltransferase component of 2-ox	1	62.709	0.0070499	88.427	82.153	62.709	1	88.427	0.0070499	88.427	1	62.709	0.0442087	62.709						2	M	VDRPVVIGGKVEVRPMMYVALTYDHRLIDGR	X;X;X;X;X;X;X;X;X;X;X;X;X;X;X;Oxidation (M);Oxidation (M);X;X;X;X;X;X;X;X;X;X;X;X;X;X	XXXXXXXXXXPPPPPPPPPPPPPPPPXXXXX	VEVRPM(1)M(1)YVALTYDHR	VEVRPM(62.71)M(62.71)YVALTYDHR	6	3	-2.5334	7997400	0	7997400	0	NaN	5591900	NaN	2405500	NaN	0	NaN	0	5591900	0	0	2405500
P11179;F1MEQ3	418;419	P11179	P11179	>sp|P11179|ODO2_BOVIN Dihydrolipoyllysine-residue succinyltransferase component of 2-oxoglutarate dehydrogenase complex, mitochondrial OS=Bos taurus GN=DLST PE=1 SV=2;>tr|F1MEQ3|F1MEQ3_BOVIN Dihydrolipoyllysine-residue succinyltransferase component of 2-ox	1	62.709	0.0070499	88.427	82.153	62.709	1	88.427	0.0070499	88.427	1	62.709	0.0442087	62.709						2	M	DRPVVIGGKVEVRPMMYVALTYDHRLIDGRE	X;X;X;X;X;X;X;X;X;X;X;X;X;X;Oxidation (M);Oxidation (M);X;X;X;X;X;X;X;X;X;X;X;X;X;X;X	XXXXXXXXXPPPPPPPPPPPPPPPPXXXXXX	VEVRPM(1)M(1)YVALTYDHR	VEVRPM(62.71)M(62.71)YVALTYDHR	7	3	-2.5334	7997400	0	7997400	0	NaN	5591900	NaN	2405500	NaN	0	NaN	0	5591900	0	0	2405500
P11966	43	P11966	P11966	>sp|P11966|ODPB_BOVIN Pyruvate dehydrogenase E1 component subunit beta, mitochondrial OS=Bos taurus GN=PDHB PE=1 SV=2	1	101.421	0.00195911	101.42	79.535	101.42					1	101.421	0.00195911	101.42						1	M	PAALQVTVREAINQGMDEELERDEKVFLLGE	X;X;X;X;X;X;X;X;X;X;X;X;X;X;X;Oxidation (M);X;X;X;X;X;X;X;X;X;X;X;X;X;X;X	XXXXXXXXXPPPPPPPPPPPPPPPPXXXXXX	EAINQGM(1)DEELERDEK	EAINQGM(101.42)DEELERDEK	7	3	0.18101	5718700	5718700	0	0	NaN	0	NaN	5718700	NaN	0	NaN	0	0	0	5718700	0
P11966	310	P11966	P11966	>sp|P11966|ODPB_BOVIN Pyruvate dehydrogenase E1 component subunit beta, mitochondrial OS=Bos taurus GN=PDHB PE=1 SV=2	1	136.814	0.000109867	136.81	126.2	136.81	1	108.634	0.00138026	108.63	1	136.814	0.000109867	136.81						1	M	GWPQFGVGAEICARIMEGPAFNFLDAPAVRV	X;X;X;X;X;X;X;X;X;X;X;X;X;X;X;Oxidation (M);X;X;X;X;X;X;X;X;X;X;X;X;X;X;X	XXXXXXXXXXXXXXPPPPPPPPPPPPPPPPX	IM(1)EGPAFNFLDAPAVR	IM(136.81)EGPAFNFLDAPAVR	2	2	-0.41943	12588000	12588000	0	0	NaN	8790500	NaN	3797900	NaN	0	NaN	8790500	0	0	3797900	0
P11966	274	P11966	P11966	>sp|P11966|ODPB_BOVIN Pyruvate dehydrogenase E1 component subunit beta, mitochondrial OS=Bos taurus GN=PDHB PE=1 SV=2	1	59.6726	0.0573815	59.673	53.266	59.673					1	59.6726	0.0573815	59.673						2	M	EGIECEVINLRTIRPMDIETIEGSVMKTNHL	X;X;X;X;X;X;X;X;X;X;X;X;X;X;X;Oxidation (M);X;X;X;X;X;X;X;X;X;Oxidation (M);X;X;X;X;X	XXXXXXXXXXXPPPPPPPPPPPPPPPPXXXX	TIRPM(1)DIETIEGSVM(1)K	TIRPM(59.67)DIETIEGSVM(59.67)K	5	3	0.92614	5079900	0	5079900	0	NaN	0	NaN	5079900	NaN	0	NaN	0	0	0	0	5079900
P11966	284	P11966	P11966	>sp|P11966|ODPB_BOVIN Pyruvate dehydrogenase E1 component subunit beta, mitochondrial OS=Bos taurus GN=PDHB PE=1 SV=2	1	59.6726	0.0573815	59.673	53.266	59.673					1	59.6726	0.0573815	59.673						2	M	RTIRPMDIETIEGSVMKTNHLVTVEGGWPQF	X;X;X;X;X;Oxidation (M);X;X;X;X;X;X;X;X;X;Oxidation (M);X;X;X;X;X;X;X;X;X;X;X;X;X;X;X	XPPPPPPPPPPPPPPPPXXXXXXXXXXXXXX	TIRPM(1)DIETIEGSVM(1)K	TIRPM(59.67)DIETIEGSVM(59.67)K	15	3	0.92614	5079900	0	5079900	0	NaN	0	NaN	5079900	NaN	0	NaN	0	0	0	0	5079900
P19120	93	P19120	P19120	>sp|P19120|HSP7C_BOVIN Heat shock cognate 71 kDa protein OS=Bos taurus GN=HSPA8 PE=1 SV=2	1	104.593	0.000565228	117.95	107.5	104.59	1	108.685	0.00106577	108.68	1	117.948	0.000565228	117.95	1	104.593	0.000734672	104.59		1	M	FDDAVVQSDMKHWPFMVVNDAGRPKVQVEYK	X;X;X;X;X;X;X;X;X;Oxidation (M);X;X;X;X;X;Oxidation (M);X;X;X;X;X;X;X;X;X;X;X;X;X;X;X	XXXXXXXXXXXPPPPPPPPPPPPPPXXXXXX	HWPFM(1)VVNDAGRPK	HWPFM(104.59)VVNDAGRPK	5	3	0.039411	67225000	67225000	0	0	NaN	37026000	NaN	13575000	NaN	16623000	NaN	37026000	0	0	13575000	0
P19120	127	P19120	P19120	>sp|P19120|HSP7C_BOVIN Heat shock cognate 71 kDa protein OS=Bos taurus GN=HSPA8 PE=1 SV=2	1	74.6109	0.000845208	115.57	103.99	74.611	1	108.997	0.00112468	109	1	115.574	0.000845208	115.57	1	74.6109	0.0494393	74.611		1	M	KSFYPEEVSSMVLTKMKEIAEAYLGKTVTNA	X;X;X;X;X;X;X;X;X;X;X;X;X;X;X;Oxidation (M);X;X;X;X;X;X;X;X;X;X;X;X;X;X;X	XXXXXXXXXXXXXXXPPPPPPPPPPPXXXXX	M(1)KEIAEAYLGK	M(74.61)KEIAEAYLGK	1	2	-1.1829	3934000	3934000	0	0	NaN	0	NaN	0	NaN	0	NaN	0	0	0	0	0
P19120	237	P19120	P19120	>sp|P19120|HSP7C_BOVIN Heat shock cognate 71 kDa protein OS=Bos taurus GN=HSPA8 PE=1 SV=2	1	115.887	0.000806686	131.83	120.88	115.89	1	110.838	0.0019657	110.84	1	119.274	0.00136946	126.19	1	115.887	0.000806686	131.83		1	M	TAGDTHLGGEDFDNRMVNHFIAEFKRKHKKD	X;X;X;X;X;X;X;X;X;X;X;X;X;X;X;Oxidation (M);X;X;X;X;X;X;X;X;X;X;X;X;X;X;X	XXXXXXXXXXXXXXXPPPPPPPPPPPXXXXX	M(1)VNHFIAEFKR	M(115.89)VNHFIAEFKR	1	3	0.66736	50695000	50695000	0	0	NaN	6153000	NaN	2514600	NaN	2145100	NaN	6153000	0	0	2514600	0
P19120	518	P19120	P19120	>sp|P19120|HSP7C_BOVIN Heat shock cognate 71 kDa protein OS=Bos taurus GN=HSPA8 PE=1 SV=2	1	103.761	0.00430324	103.76	98.706	103.76					1	103.761	0.00430324	103.76						1	M	ITNDKGRLSKEDIERMVQEAEKYKAEDEKQR	X;X;X;X;X;X;X;X;X;X;X;X;X;X;X;Oxidation (M);X;X;X;X;X;X;X;X;X;X;X;X;X;X;X	XXXXXXXXXXXXXXXPPPPPPPPPPPPPPXX	M(1)VQEAEKYKAEDEK	M(103.76)VQEAEKYKAEDEK	1	3	-0.24445	3355900	3355900	0	0	NaN	0	NaN	3355900	NaN	0	NaN	0	0	0	3355900	0
P19120	61	P19120	P19120	>sp|P19120|HSP7C_BOVIN Heat shock cognate 71 kDa protein OS=Bos taurus GN=HSPA8 PE=1 SV=2	1	143.055	7.55629E-08	168.5	159.46	143.05	1	120.705	0.000211751	120.7					1	143.055	7.55629E-08	168.5		1	M	DTERLIGDAAKNQVAMNPTNTVFDAKRLIGR	X;X;X;X;X;X;X;X;X;X;X;X;X;X;X;Oxidation (M);X;X;X;X;X;X;X;X;X;X;X;X;X;X;X	XXXXXXXXXXXPPPPPPPPPPPPPPPPXXXX	NQVAM(1)NPTNTVFDAKR	NQVAM(143.05)NPTNTVFDAKR	5	3	-0.96869	103820000	103820000	0	0	NaN	79498000	NaN	0	NaN	22370000	NaN	79498000	0	0	0	0
P19120	549	P19120	P19120	>sp|P19120|HSP7C_BOVIN Heat shock cognate 71 kDa protein OS=Bos taurus GN=HSPA8 PE=1 SV=2	1	94.7673	0.0129378	108.9	105.93	94.767	1	108.903	0.0129378	108.9	1	101.393	0.0176174	101.39	1	94.7673	0.0357257	94.767		1	M	DKVSSKNSLESYAFNMKATVEDEKLQGKIND	X;X;X;X;X;X;X;X;X;X;X;X;X;X;X;Oxidation (M);X;X;X;X;X;X;X;X;X;X;X;X;X;X;X	XXXXXXPPPPPPPPPPPXXXXXXXXXXXXXX	NSLESYAFNM(1)K	NSLESYAFNM(94.77)K	10	2	0.4661	43252000	43252000	0	0	NaN	23604000	NaN	9385600	NaN	10262000	NaN	23604000	0	0	9385600	0
P19120	87	P19120	P19120	>sp|P19120|HSP7C_BOVIN Heat shock cognate 71 kDa protein OS=Bos taurus GN=HSPA8 PE=1 SV=2	1	42.5791	4.76244E-05	142.39	44.435	42.579	1	122.662	0.000818346	122.66	1	48.5322	4.76244E-05	142.39	1	42.5791	0.000167888	135.04		1	M	RLIGRRFDDAVVQSDMKHWPFMVVNDAGRPK	X;X;X;X;X;X;X;X;X;X;X;X;X;X;X;Oxidation (M);X;X;X;X;X;Oxidation (M);X;X;X;X;X;X;X;X;X	XXXXXPPPPPPPPPPPPXXXXXXXXXXXXXX	RFDDAVVQSDM(1)K	RFDDAVVQSDM(42.58)K	11	3	1.8321	45255000	45255000	0	0	NaN	18411000	NaN	12828000	NaN	6458100	NaN	18411000	0	0	12828000	0
P49951;F1MPU0	1378;1364	P49951	P49951	>sp|P49951|CLH1_BOVIN Clathrin heavy chain 1 OS=Bos taurus GN=CLTC PE=1 SV=1;>tr|F1MPU0|F1MPU0_BOVIN Clathrin heavy chain 1 (Fragment) OS=Bos taurus GN=CLTC PE=4 SV=2	1	61.9602	0.00115964	99.562	99.547	61.96	1	65.962	0.00985578	87.005	1	99.5622	0.00115964	99.562	1	61.9602	0.0190715	72.389		2	M	FLYDKYEEYDNAIITMMNHPTDAWKEGQFKD	X;X;X;X;X;X;X;X;X;X;X;X;X;X;X;Oxidation (M);Oxidation (M);X;X;X;X;X;X;X;X;X;X;X;X;X;X	PPPPPPPPPPPPPPPPPPPPPPPPPXXXXXX	AAEQAHLWAELVFLYDKYEEYDNAIITM(1)M(1)NHPTDAWK	AAEQAHLWAELVFLYDKYEEYDNAIITM(61.96)M(61.96)NHPTDAWK	28	4	-0.045068	267510000	0	267510000	0	NaN	159810000	NaN	58950000	NaN	28987000	NaN	0	159810000	0	0	58950000
P49951;F1MPU0	1379;1365	P49951	P49951	>sp|P49951|CLH1_BOVIN Clathrin heavy chain 1 OS=Bos taurus GN=CLTC PE=1 SV=1;>tr|F1MPU0|F1MPU0_BOVIN Clathrin heavy chain 1 (Fragment) OS=Bos taurus GN=CLTC PE=4 SV=2	1	61.9602	0.00115964	99.562	99.547	61.96	1	65.962	0.00985578	87.005	1	99.5622	0.00115964	99.562	1	61.9602	0.0190715	72.389		2	M	LYDKYEEYDNAIITMMNHPTDAWKEGQFKDI	X;X;X;X;X;X;X;X;X;X;X;X;X;X;Oxidation (M);Oxidation (M);X;X;X;X;X;X;X;X;X;X;X;X;X;X;X	PPPPPPPPPPPPPPPPPPPPPPPPXXXXXXX	AAEQAHLWAELVFLYDKYEEYDNAIITM(1)M(1)NHPTDAWK	AAEQAHLWAELVFLYDKYEEYDNAIITM(61.96)M(61.96)NHPTDAWK	29	4	-0.045068	267510000	0	267510000	0	NaN	159810000	NaN	58950000	NaN	28987000	NaN	0	159810000	0	0	58950000
P49951;F1MPU0	1138;1124	P49951	P49951	>sp|P49951|CLH1_BOVIN Clathrin heavy chain 1 OS=Bos taurus GN=CLTC PE=1 SV=1;>tr|F1MPU0|F1MPU0_BOVIN Clathrin heavy chain 1 (Fragment) OS=Bos taurus GN=CLTC PE=4 SV=2	1	62.193	0.0276338	62.193	61.665	62.193					1	62.193	0.0276338	62.193						1	M	EAIDSYIKADDPSSYMEVVQAANTSGNWEEL	X;X;X;X;X;X;X;X;X;X;X;X;X;X;X;Oxidation (M);X;X;X;X;X;X;Deamidation (NQ);X;X;X;X;X;X;X;X	XXXXXXXXPPPPPPPPPPPPPPPPPPPPPPP	ADDPSSYM(1)EVVQAANTSGNWEELVK	ADDPSSYM(62.19)EVVQAANTSGNWEELVK	8	2	0.6981	42098000	42098000	0	0	0.3774	0	0	42098000	1.2388	0	NaN	0	0	0	42098000	0
P49951;F1MPU0	996;982	P49951	P49951	>sp|P49951|CLH1_BOVIN Clathrin heavy chain 1 OS=Bos taurus GN=CLTC PE=1 SV=1;>tr|F1MPU0|F1MPU0_BOVIN Clathrin heavy chain 1 (Fragment) OS=Bos taurus GN=CLTC PE=4 SV=2	1	46.2485	0.00265802	86.005	83.226	46.249	1	46.2485	0.00265802	86.005	1	72.5834	0.0089406	72.583	1	72.4328	0.00825968	72.433		1	M	ETQDPEEVSVTVKAFMTADLPNELIELLEKI	X;X;X;X;X;X;X;X;X;X;X;X;X;X;X;Oxidation (M);X;X;X;X;X;Deamidation (NQ);X;X;X;X;X;X;X;X;X	XXXXXXXXXXXXXPPPPPPPPPPPPPPPPPX	AFM(1)TADLPNELIELLEK	AFM(46.25)TADLPNELIELLEK	3	2	0.26892	217560000	217560000	0	0	NaN	27923000	NaN	15014000	NaN	6859800	NaN	27923000	0	0	15014000	0
P49951;F1MPU0	1314;1300	P49951	P49951	>sp|P49951|CLH1_BOVIN Clathrin heavy chain 1 OS=Bos taurus GN=CLTC PE=1 SV=1;>tr|F1MPU0|F1MPU0_BOVIN Clathrin heavy chain 1 (Fragment) OS=Bos taurus GN=CLTC PE=4 SV=2	1	85.8373	2.22761E-11	143.46	140.2	85.837	1	123.758	3.05627E-07	139.66	1	85.8373	1.58179E-05	133.48	1	85.8373	2.22761E-11	143.46		1;2	M	LITMLEAALGLERAHMGMFTELAILYSKFKP	X;X;X;X;X;X;X;X;X;X;X;X;X;X;X;Oxidation (M);X;Oxidation (M);X;X;X;X;X;X;X;X;X;X;X;X;X	XXXXXXXXXXXXXPPPPPPPPPPPPPPPXXX	AHM(1)GM(1)FTELAILYSK	AHM(85.84)GM(85.84)FTELAILYSK	3	3	0.94347	3356500000	93986000	3262500000	0	NaN	1301100000	NaN	639290000	NaN	15955000	NaN	23800000	1277300000	0	14172000	625120000
P49951;F1MPU0	1316;1302	P49951	P49951	>sp|P49951|CLH1_BOVIN Clathrin heavy chain 1 OS=Bos taurus GN=CLTC PE=1 SV=1;>tr|F1MPU0|F1MPU0_BOVIN Clathrin heavy chain 1 (Fragment) OS=Bos taurus GN=CLTC PE=4 SV=2	1	85.8373	2.22761E-11	158.93	154.86	85.837	1	123.758	3.05627E-07	139.66	1	85.8373	1.41806E-07	151.22	1	85.8373	2.22761E-11	158.93		1;2	M	TMLEAALGLERAHMGMFTELAILYSKFKPQK	X;X;X;X;X;X;X;X;X;X;X;X;X;Oxidation (M);X;Oxidation (M);X;X;X;X;X;X;X;X;X;X;X;X;X;X;X	XXXXXXXXXXXPPPPPPPPPPPPPPPXXXXX	AHM(1)GM(1)FTELAILYSK	AHM(85.84)GM(85.84)FTELAILYSK	5	3	0.94347	3300800000	38245000	3262500000	0	NaN	1287400000	NaN	629260000	NaN	4060700	NaN	10025000	1277300000	0	4141000	625120000
P49951;F1MPU0	104;91	P49951	P49951	>sp|P49951|CLH1_BOVIN Clathrin heavy chain 1 OS=Bos taurus GN=CLTC PE=1 SV=1;>tr|F1MPU0|F1MPU0_BOVIN Clathrin heavy chain 1 (Fragment) OS=Bos taurus GN=CLTC PE=4 SV=2	1	133.23	8.08239E-07	196.15	188.62	133.23	1	88.1077	8.08239E-07	196.15	1	125.672	4.35652E-06	167.83	1	133.23	1.68119E-06	183.37		1;2	M	QIFNIEMKSKMKAHTMTDDVTFWKWISLNTV	Deamidation (NQ);X;X;Deamidation (NQ);X;X;Oxidation (M);X;X;X;Oxidation (M);X;X;X;X;Oxidation (M);X;X;X;X;X;X;X;X;X;X;X;X;Deamidation (NQ);X;X	XXXXXXXXXXPPPPPPPPPPPPPPXXXXXXX	M(1)KAHTM(1)TDDVTFWK	M(133.23)KAHTM(133.23)TDDVTFWK	6	3	-1.4875	3920600000	3292700000	627890000	0	49.464	1639900000	37.074	871620000	45.18	692630000	44.015	1361700000	278240000	0	720910000	150720000
P49951;F1MPU0	670;657	P49951	P49951	>sp|P49951|CLH1_BOVIN Clathrin heavy chain 1 OS=Bos taurus GN=CLTC PE=1 SV=1;>tr|F1MPU0|F1MPU0_BOVIN Clathrin heavy chain 1 (Fragment) OS=Bos taurus GN=CLTC PE=4 SV=2	1	113.499	0.0185476	113.5	81.469	113.5	1	109.012	0.0297119	109.01	1	45.6996	0.0297119	109.01	1	113.499	0.0185476	113.5		1	M	FGSLSVEDSLECLRAMLSANIRQNLQICVQV	X;X;X;X;X;X;X;X;X;X;X;X;X;X;X;Oxidation (M);X;X;X;X;X;X;X;X;X;X;X;X;X;X;X	XXXXXXXXXXXXXXPPPPPPPPXXXXXXXXX	AM(1)LSANIR	AM(113.5)LSANIR	2	2	-0.67664	1121600000	1121600000	0	0	39.812	560820000	NaN	332000000	23.107	228820000	16.575	560820000	0	0	332000000	0
P49951;F1MPU0	1538;1524	P49951	P49951	>sp|P49951|CLH1_BOVIN Clathrin heavy chain 1 OS=Bos taurus GN=CLTC PE=1 SV=1;>tr|F1MPU0|F1MPU0_BOVIN Clathrin heavy chain 1 (Fragment) OS=Bos taurus GN=CLTC PE=4 SV=2	1	154.457	7.13991E-08	155.8	153.66	154.46	1	123.758	7.13991E-08	155.8	1	126.915	5.49842E-05	132.25	1	154.457	9.27192E-08	154.46		1	M	QSVELCKKDSLYKDAMQYASESKDTELAEEL	X;X;X;X;X;X;X;X;X;X;X;X;X;X;X;Oxidation (M);X;X;X;X;X;X;X;X;X;X;X;X;X;X;X	XXXXXXXXPPPPPPPPPPPPPPPPPPPPPPP	DSLYKDAM(1)QYASESK	DSLYKDAM(154.46)QYASESK	8	2	0.060994	1237700000	1237700000	0	0	26.164	10319000	0.42564	5218900	0.3772	5590700	0.60612	10319000	0	0	5218900	0
P49951;F1MPU0	55;42	P49951	P49951	>sp|P49951|CLH1_BOVIN Clathrin heavy chain 1 OS=Bos taurus GN=CLTC PE=1 SV=1;>tr|F1MPU0|F1MPU0_BOVIN Clathrin heavy chain 1 (Fragment) OS=Bos taurus GN=CLTC PE=4 SV=2	1	43.8232	0.000658386	107.06	105.65	43.823	1	53.0333	0.000428882	105.06	1	67.928	8.5213E-05	107.06	1	43.8232	0.000658386	103.73		1	M	IREKVGEQAQVVIIDMNDPSNPIRRPISADS	X;X;X;X;X;X;X;X;X;X;X;X;X;X;X;Oxidation (M);X;X;X;X;X;X;X;X;X;X;X;X;X;X;X	XXPPPPPPPPPPPPPPPPPPPPPPPXXXXXX	VGEQAQVVIIDM(1)NDPSNPIRR	VGEQAQVVIIDM(43.82)NDPSNPIRR	12	3	-0.51726	4822600000	4822600000	0	0	26.7	23896000	0.37104	13518000	0.15442	11089000	0.38659	23896000	0	0	13518000	0
P49951	32	P49951	P49951	>sp|P49951|CLH1_BOVIN Clathrin heavy chain 1 OS=Bos taurus GN=CLTC PE=1 SV=1	1	49.5247	0.00266015	80.722	79.545	49.525	1	65.7664	0.0126005	65.766	1	80.7216	0.00266015	80.722	1	49.5247	0.0290875	49.525		1	M	NLGINPANIGFSTLTMESDKFICIREKVGEQ	X;X;X;X;X;X;X;X;X;X;X;X;X;X;X;Oxidation (M);X;X;X;X;X;X;X;X;X;X;X;X;X;X;X	PPPPPPPPPPPPPPPPPPPPXXXXXXXXXXX	FQEHLQLQNLGINPANIGFSTLTM(1)ESDK	FQEHLQLQNLGINPANIGFSTLTM(49.52)ESDK	24	3	-0.69706	929810000	929810000	0	0	19.069	355650000	17.592	322450000	23.046	251700000	17.297	355650000	0	0	322450000	0
P49951;F1MPU0	1592;1578	P49951	P49951	>sp|P49951|CLH1_BOVIN Clathrin heavy chain 1 OS=Bos taurus GN=CLTC PE=1 SV=1;>tr|F1MPU0|F1MPU0_BOVIN Clathrin heavy chain 1 (Fragment) OS=Bos taurus GN=CLTC PE=4 SV=2	1	101.555	1.8767E-05	112.24	102.54	110.35	1	100.317	9.8918E-05	112.24	1	96.3445	0.000182054	112.17	1	101.555	1.8767E-05	110.35		1;2;3	M	LRPDVVLETAWRHNIMDFAMPYFIQVMKEYL	X;X;X;X;X;X;X;X;X;X;X;X;X;X;X;Oxidation (M);X;X;X;Oxidation (M);X;X;X;X;X;X;Oxidation (M);X;X;X;X	XXXXXXXXXXXXPPPPPPPPPPPPPPPPXXX	HNIM(1)DFAM(1)PYFIQVMK	HNIM(101.55)DFAM(80.5)PYFIQVM(-80.5)K	4	2	-0.65739	6278700000	3735500	981890000	5293000000	NaN	1393900000	NaN	848870000	NaN	820260000	NaN	0	454380000	939560000	3735500	201230000
P49951;F1MPU0	1596;1582	P49951	P49951	>sp|P49951|CLH1_BOVIN Clathrin heavy chain 1 OS=Bos taurus GN=CLTC PE=1 SV=1;>tr|F1MPU0|F1MPU0_BOVIN Clathrin heavy chain 1 (Fragment) OS=Bos taurus GN=CLTC PE=4 SV=2	1	80.5031	1.8767E-05	112.24	102.54	110.35	1	82.0634	9.8918E-05	112.24	1	84.6133	0.000199869	105.14	1	80.5031	1.8767E-05	110.35		2;3	M	VVLETAWRHNIMDFAMPYFIQVMKEYLTKVD	X;X;X;X;X;X;X;X;X;X;X;Oxidation (M);X;X;X;Oxidation (M);X;X;X;X;X;X;Oxidation (M);X;X;X;X;X;X;X;X	XXXXXXXXPPPPPPPPPPPPPPPPXXXXXXX	HNIM(1)DFAM(1)PYFIQVMK	HNIM(101.55)DFAM(80.5)PYFIQVM(-80.5)K	8	2	-0.65739	6281100000	6186300	981890000	5293000000	NaN	1400100000	NaN	845130000	NaN	820260000	NaN	6186300	454380000	939560000	0	201230000
P49951;F1MPU0	1603;1589	P49951	P49951	>sp|P49951|CLH1_BOVIN Clathrin heavy chain 1 OS=Bos taurus GN=CLTC PE=1 SV=1;>tr|F1MPU0|F1MPU0_BOVIN Clathrin heavy chain 1 (Fragment) OS=Bos taurus GN=CLTC PE=4 SV=2	1	48.8985	0.00466153	85.742	85.234	48.899	1	48.3913	0.00466153	85.742	1	56.514	0.0133286	79.394	1	48.8985	0.014559	84.508		3	M	RHNIMDFAMPYFIQVMKEYLTKVDKLDASES	X;X;X;X;Oxidation (M);X;X;X;Oxidation (M);X;X;X;X;X;X;Oxidation (M);X;X;X;X;X;X;X;X;X;X;X;X;X;X;X	XPPPPPPPPPPPPPPPPXXXXXXXXXXXXXX	HNIM(1)DFAM(1)PYFIQVM(1)K	HNIM(48.9)DFAM(48.9)PYFIQVM(48.9)K	15	3	-0.74433	5293000000	0	0	5293000000	NaN	939560000	NaN	643900000	NaN	659790000	NaN	0	0	939560000	0	0
P49951;F1MPU0	264;251	P49951	P49951	>sp|P49951|CLH1_BOVIN Clathrin heavy chain 1 OS=Bos taurus GN=CLTC PE=1 SV=1;>tr|F1MPU0|F1MPU0_BOVIN Clathrin heavy chain 1 (Fragment) OS=Bos taurus GN=CLTC PE=4 SV=2	1	60.2176	0.0262866	61.437	61.183	60.218	1	58.2717	0.0262866	58.272	1	61.4367	0.0299379	61.437	1	60.2176	0.0312218	60.218		1	M	DVFFPPEAQNDFPVAMQISEKHDVVFLITKY	X;X;X;X;X;X;X;X;X;X;X;X;X;X;X;Oxidation (M);X;X;X;X;X;X;X;X;X;X;X;X;X;X;X	PPPPPPPPPPPPPPPPPPPPPXXXXXXXXXX	KAVDVFFPPEAQNDFPVAM(1)QISEK	KAVDVFFPPEAQNDFPVAM(60.22)QISEK	19	3	-1.803	2114500000	2114500000	0	0	4.4059	942840000	4.9641	425190000	3.7682	518850000	2.9287	942840000	0	0	425190000	0
P49951;F1MPU0	587;574	P49951	P49951	>sp|P49951|CLH1_BOVIN Clathrin heavy chain 1 OS=Bos taurus GN=CLTC PE=1 SV=1;>tr|F1MPU0|F1MPU0_BOVIN Clathrin heavy chain 1 (Fragment) OS=Bos taurus GN=CLTC PE=4 SV=2	1	86.486	8.11175E-05	105.35	104.97	105.35	1	77.0624	0.00106776	88.708	1	86.486	8.11175E-05	105.35	1	74.2872	0.000120446	101.45		2;3	M	NNRPSEGPLQTRLLEMNLMHAPQVADAILGN	Deamidation (NQ);Deamidation (NQ);X;X;X;X;X;X;X;X;X;X;X;X;X;Oxidation (M);X;X;Oxidation (M);X;X;X;X;X;X;X;X;X;X;X;X	XXXXXXXXXXXXPPPPPPPPPPPPPPPPPPP	LLEM(1)NLM(1)HAPQVADAILGNQMFTHYDR	LLEM(86.49)NLM(82.94)HAPQVADAILGNQM(-82.94)FTHYDR	4	3	0.44696	7459500000	0	720630000	6738900000	NaN	1868000000	NaN	1020800000	NaN	811750000	NaN	0	176550000	1691400000	0	63369000
P49951;F1MPU0	590;577	P49951	P49951	>sp|P49951|CLH1_BOVIN Clathrin heavy chain 1 OS=Bos taurus GN=CLTC PE=1 SV=1;>tr|F1MPU0|F1MPU0_BOVIN Clathrin heavy chain 1 (Fragment) OS=Bos taurus GN=CLTC PE=4 SV=2	1	82.9429	8.11175E-05	105.35	104.97	105.35	1	48.7732	0.00106776	88.708	1	82.9429	8.11175E-05	105.35	1	74.2872	0.000120446	101.45		1;2;3	M	PSEGPLQTRLLEMNLMHAPQVADAILGNQMF	X;X;X;X;X;X;X;X;X;X;X;X;Oxidation (M);X;X;Oxidation (M);X;X;X;X;X;X;X;X;X;X;X;X;X;Oxidation (M);X	XXXXXXXXXPPPPPPPPPPPPPPPPPPPPPP	LLEM(1)NLM(1)HAPQVADAILGNQMFTHYDR	LLEM(86.49)NLM(82.94)HAPQVADAILGNQM(-82.94)FTHYDR	7	3	0.44696	7495900000	2987400	754100000	6738900000	NaN	1868000000	NaN	1040000000	NaN	829040000	NaN	0	176550000	1691400000	2987400	79551000
P49951;F1MPU0	604;591	P49951	P49951	>sp|P49951|CLH1_BOVIN Clathrin heavy chain 1 OS=Bos taurus GN=CLTC PE=1 SV=1;>tr|F1MPU0|F1MPU0_BOVIN Clathrin heavy chain 1 (Fragment) OS=Bos taurus GN=CLTC PE=4 SV=2	1	74.2872	0.000151877	101.45	100.43	74.287	1	48.7732	0.00770298	76.899	1	73.6762	0.0109512	73.676	1	74.2872	0.000151877	101.45		2;3	M	LMHAPQVADAILGNQMFTHYDRAHIAQLCEK	X;Oxidation (M);X;X;X;X;X;X;X;X;X;X;X;X;X;Oxidation (M);X;X;X;X;X;X;X;X;X;X;X;X;X;X;X	PPPPPPPPPPPPPPPPPPPPPPXXXXXXXXX	LLEM(1)NLM(1)HAPQVADAILGNQM(1)FTHYDR	LLEM(74.29)NLM(74.29)HAPQVADAILGNQM(74.29)FTHYDR	21	3	1.0931	6772300000	0	33472000	6738900000	NaN	1691400000	NaN	973600000	NaN	755620000	NaN	0	0	1691400000	0	16182000
P49951;F1MPU0	99;86	P49951	P49951	>sp|P49951|CLH1_BOVIN Clathrin heavy chain 1 OS=Bos taurus GN=CLTC PE=1 SV=1;>tr|F1MPU0|F1MPU0_BOVIN Clathrin heavy chain 1 (Fragment) OS=Bos taurus GN=CLTC PE=4 SV=2	1	133.23	0.00031899	133.23	130.08	133.23	1	88.1077	0.00496188	88.108	1	125.672	0.0088109	125.67	1	133.23	0.00031899	133.23		2	M	AGKTLQIFNIEMKSKMKAHTMTDDVTFWKWI	X;X;X;X;X;Deamidation (NQ);X;X;Deamidation (NQ);X;X;Oxidation (M);X;X;X;Oxidation (M);X;X;X;X;Oxidation (M);X;X;X;X;X;X;X;X;X;X	XXXXXXXXXXXXXXXPPPPPPPPPPPPPPXX	M(1)KAHTM(1)TDDVTFWK	M(133.23)KAHTM(133.23)TDDVTFWK	1	3	-1.4875	627890000	0	627890000	0	NaN	278240000	NaN	150720000	NaN	129590000	NaN	0	278240000	0	0	150720000
P49951;F1MPU0	1332;1318	P49951	P49951	>sp|P49951|CLH1_BOVIN Clathrin heavy chain 1 OS=Bos taurus GN=CLTC PE=1 SV=1;>tr|F1MPU0|F1MPU0_BOVIN Clathrin heavy chain 1 (Fragment) OS=Bos taurus GN=CLTC PE=4 SV=2	1	113.987	0.00130734	121.86	113.07	113.99	1	118.607	0.00130734	118.61	1	121.865	0.00176408	121.86	1	113.987	0.00160564	113.99		1	M	FTELAILYSKFKPQKMREHLELFWSRVNIPK	X;X;X;X;X;X;X;X;X;X;X;X;X;X;X;Oxidation (M);X;X;X;X;X;X;X;X;X;X;X;X;X;X;X	XXXXXXXXXXXXXXXPPPPPPPPPPPXXXXX	M(1)REHLELFWSR	M(113.99)REHLELFWSR	1	2	-0.19033	2577900000	2577900000	0	0	82.93	352650000	23.918	251130000	25.013	228990000	36.342	352650000	0	0	251130000	0
P49951;F1MPU0	73;60	P49951	P49951	>sp|P49951|CLH1_BOVIN Clathrin heavy chain 1 OS=Bos taurus GN=CLTC PE=1 SV=1;>tr|F1MPU0|F1MPU0_BOVIN Clathrin heavy chain 1 (Fragment) OS=Bos taurus GN=CLTC PE=4 SV=2	1	91.789	3.12627E-10	194.13	172.58	91.789	1	98.5078	2.56745E-07	161.49	1	103.172	3.12627E-10	180.95	1	91.789	5.99472E-10	194.13		1	M	PSNPIRRPISADSAIMNPASKVIALKAGKTL	X;X;X;X;X;X;X;X;X;X;X;X;X;X;X;Oxidation (M);X;X;X;X;X;X;X;X;X;X;X;X;X;X;X	XXXXXXPPPPPPPPPPPPPPPXXXXXXXXXX	RPISADSAIM(1)NPASK	RPISADSAIM(91.79)NPASK	10	2	0.24298	4905300000	4905300000	0	0	52.677	1145000000	18.62	365150000	17.925	314990000	27.981	1145000000	0	0	365150000	0
P49951;F1MPU0	1424;1410	P49951	P49951	>sp|P49951|CLH1_BOVIN Clathrin heavy chain 1 OS=Bos taurus GN=CLTC PE=1 SV=1;>tr|F1MPU0|F1MPU0_BOVIN Clathrin heavy chain 1 (Fragment) OS=Bos taurus GN=CLTC PE=4 SV=2	1	80.6319	0.00405596	102.65	96.978	80.632	1	102.649	0.00405596	102.65	1	80.6319	0.0295167	80.632						1	M	QFYLEFKPLLLNDLLMVLSPRLDHTRAVNYF	X;X;X;X;X;X;X;X;X;X;X;X;X;X;X;Oxidation (M);X;X;X;X;X;X;X;X;X;X;X;X;Deamidation (NQ);X;X	XXXXXXXPPPPPPPPPPPPPPXXXXXXXXXX	PLLLNDLLM(1)VLSPR	PLLLNDLLM(80.63)VLSPR	9	2	0.15268	4513700	4513700	0	0	NaN	1955700	NaN	2557900	NaN	0	NaN	1955700	0	0	2557900	0
P49951;F1MPU0	95;82	P49951	P49951	>sp|P49951|CLH1_BOVIN Clathrin heavy chain 1 OS=Bos taurus GN=CLTC PE=1 SV=1;>tr|F1MPU0|F1MPU0_BOVIN Clathrin heavy chain 1 (Fragment) OS=Bos taurus GN=CLTC PE=4 SV=2	1	90.3062	0.0111299	96.113	55.386	90.306	1	81.0165	0.0111299	84.882	1	96.1135	0.0420317	96.113	1	90.3062	0.0537876	90.306		1	M	IALKAGKTLQIFNIEMKSKMKAHTMTDDVTF	X;X;X;X;X;X;X;X;X;Deamidation (NQ);X;X;Deamidation (NQ);X;X;Oxidation (M);X;X;X;Oxidation (M);X;X;X;X;Oxidation (M);X;X;X;X;X;X	XXXXXXXPPPPPPPPPPXXXXXXXXXXXXXX	TLQIFNIEM(1)K	TLQIFNIEM(90.31)K	9	2	-1.2903	2105300000	2105300000	0	0	10.014	925830000	11.591	568290000	8.5834	593170000	9.2455	925830000	0	0	568290000	0
P49951;F1MPU0	1041;1027	P49951	P49951	>sp|P49951|CLH1_BOVIN Clathrin heavy chain 1 OS=Bos taurus GN=CLTC PE=1 SV=1;>tr|F1MPU0|F1MPU0_BOVIN Clathrin heavy chain 1 (Fragment) OS=Bos taurus GN=CLTC PE=4 SV=2	1	99.1393	0.00985985	124.89	88.318	99.139	1	87.2836	0.0160983	122.79	1	97.6019	0.0120397	124.89	1	99.1393	0.00985985	119.57		1	M	NLLILTAIKADRTRVMEYINRLDNYDAPDIA	Deamidation (NQ);X;X;X;X;X;X;X;X;X;X;X;X;X;X;Oxidation (M);X;X;X;Deamidation (NQ);X;X;X;X;X;X;X;X;X;X;X	XXXXXXXXXXXXPPPPPPPPPXXXXXXXXXX	VM(1)EYINR	VM(99.14)EYINR	2	2	-0.07144	2587700000	2587700000	0	0	106.46	12741000	NaN	4395300	0.31611	5267700	0.50642	12741000	0	0	4395300	0
P49951;F1MPU0	181;168	P49951	P49951	>sp|P49951|CLH1_BOVIN Clathrin heavy chain 1 OS=Bos taurus GN=CLTC PE=1 SV=1;>tr|F1MPU0|F1MPU0_BOVIN Clathrin heavy chain 1 (Fragment) OS=Bos taurus GN=CLTC PE=4 SV=2	1	121.655	1.67945E-05	167.84	143.49	121.66	1	124.207	1.67945E-05	148.78	1	110.582	3.72242E-06	167.84	1	121.655	2.64519E-07	151.52		1	M	LLTGISAQQNRVVGAMQLYSVDRKVSQPIEG	X;X;X;X;X;X;X;X;X;X;X;X;X;X;X;Oxidation (M);X;X;X;X;X;X;X;X;X;X;X;X;X;X;X	XXXXXXXXXXXPPPPPPPPPPPPPXXXXXXX	VVGAM(1)QLYSVDRK	VVGAM(121.66)QLYSVDRK	5	3	-0.77447	3624100000	3624100000	0	0	5.8526	303750000	0.94345	174220000	0.94916	106230000	0.93425	303750000	0	0	174220000	0
P49951;F1MPU0	132;119	P49951	P49951	>sp|P49951|CLH1_BOVIN Clathrin heavy chain 1 OS=Bos taurus GN=CLTC PE=1 SV=1;>tr|F1MPU0|F1MPU0_BOVIN Clathrin heavy chain 1 (Fragment) OS=Bos taurus GN=CLTC PE=4 SV=2	1	44.6	0.0158563	60.172	56.554	44.6	1	51.1041	0.0257979	51.104	1	41.0473	0.0158563	60.172	1	44.6	0.0509224	44.6		1	M	NTVALVTDNAVYHWSMEGESQPVKMFDRHSS	Deamidation (NQ);X;X;X;X;X;X;X;X;X;X;X;X;X;X;Oxidation (M);X;X;X;X;X;X;X;X;X;X;X;X;X;X;X	PPPPPPPPPPPPPPPPPPPPPPPPXXXXXXX	WISLNTVALVTDNAVYHWSM(1)EGESQPVK	WISLNTVALVTDNAVYHWSM(44.6)EGESQPVK	20	3	3.7868	377730000	377730000	0	0	21.472	0	0	36390000	9.8815	5266000	NaN	0	0	0	36390000	0
P49951;F1MPU0	1159;1145	P49951	P49951	>sp|P49951|CLH1_BOVIN Clathrin heavy chain 1 OS=Bos taurus GN=CLTC PE=1 SV=1;>tr|F1MPU0|F1MPU0_BOVIN Clathrin heavy chain 1 (Fragment) OS=Bos taurus GN=CLTC PE=4 SV=2	1	105.822	0.0487495	106.05	26.109	105.82	1	105.822	0.0495958	105.82	1	106.048	0.0487495	106.05	1	105.822	0.0495958	105.82		1	M	ANTSGNWEELVKYLQMARKKARESYVETELI	X;Deamidation (NQ);X;X;X;X;X;X;X;X;X;X;X;X;X;Oxidation (M);X;X;X;X;X;X;X;X;X;X;X;X;X;X;X	XXXXXXXXXXXXPPPPPPXXXXXXXXXXXXX	YLQM(1)AR	YLQM(105.82)AR	4	2	-1.3524	1464700000	1464700000	0	0	32.377	806680000	28.755	395070000	38.955	262960000	37.332	806680000	0	0	395070000	0
P63258;P60712	325;325	P63258	P63258	>sp|P63258|ACTG_BOVIN Actin, cytoplasmic 2 OS=Bos taurus GN=ACTG1 PE=1 SV=1;>sp|P60712|ACTB_BOVIN Actin, cytoplasmic 1 OS=Bos taurus GN=ACTB PE=1 SV=1	1	89.8046	0.0596631	89.805	61.228	89.805	1	89.8046	0.0596631	89.805										1	M	ADRMQKEITALAPSTMKIKIIAPPERKYSVW	X;X;X;X;X;X;X;X;X;X;X;X;X;X;X;Oxidation (M);X;X;X;X;X;X;X;X;X;X;X;X;X;X;X	XXXXXXPPPPPPPPPPPXXXXXXXXXXXXXX	EITALAPSTM(1)K	EITALAPSTM(89.8)K	10	2	0.59467	41248000	41248000	0	0	NaN	41248000	NaN	0	NaN	0	NaN	41248000	0	0	0	0
P63258;P60712;F1MRD0	44;44;44	P63258	P63258	>sp|P63258|ACTG_BOVIN Actin, cytoplasmic 2 OS=Bos taurus GN=ACTG1 PE=1 SV=1;>sp|P60712|ACTB_BOVIN Actin, cytoplasmic 1 OS=Bos taurus GN=ACTB PE=1 SV=1;>tr|F1MRD0|F1MRD0_BOVIN Actin, cytoplasmic 1 OS=Bos taurus GN=ACTB PE=3 SV=2	1	72.5823	0.0067913	96.171	84.113	72.582	1	72.2763	0.0249822	72.276	1	96.1713	0.0067913	96.171	1	72.5823	0.0245398	72.582		2	M	AVFPSIVGRPRHQGVMVGMGQKDSYVGDEAQ	X;X;X;X;X;X;X;X;X;X;X;X;X;X;X;Oxidation (M);X;X;Oxidation (M);X;X;X;X;X;X;X;X;X;X;X;X	XXXXXXXXXXXPPPPPPPPPPPXXXXXXXXX	HQGVM(1)VGM(1)GQK	HQGVM(72.58)VGM(72.58)GQK	5	2	0.33624	42949000	0	42949000	0	NaN	23650000	NaN	11432000	NaN	7866900	NaN	0	23650000	0	0	11432000
P63258;P60712;F1MRD0	47;47;47	P63258	P63258	>sp|P63258|ACTG_BOVIN Actin, cytoplasmic 2 OS=Bos taurus GN=ACTG1 PE=1 SV=1;>sp|P60712|ACTB_BOVIN Actin, cytoplasmic 1 OS=Bos taurus GN=ACTB PE=1 SV=1;>tr|F1MRD0|F1MRD0_BOVIN Actin, cytoplasmic 1 OS=Bos taurus GN=ACTB PE=3 SV=2	1	72.5823	0.0067913	96.171	84.113	72.582	1	72.2763	0.0249822	72.276	1	96.1713	0.0067913	96.171	1	72.5823	0.0245398	72.582		2	M	PSIVGRPRHQGVMVGMGQKDSYVGDEAQSKR	X;X;X;X;X;X;X;X;X;X;X;X;Oxidation (M);X;X;Oxidation (M);X;X;X;X;X;X;X;X;X;X;X;X;X;X;X	XXXXXXXXPPPPPPPPPPPXXXXXXXXXXXX	HQGVM(1)VGM(1)GQK	HQGVM(72.58)VGM(72.58)GQK	8	2	0.33624	42949000	0	42949000	0	NaN	23650000	NaN	11432000	NaN	7866900	NaN	0	23650000	0	0	11432000
P63258;P60712	305;305	P63258	P63258	>sp|P63258|ACTG_BOVIN Actin, cytoplasmic 2 OS=Bos taurus GN=ACTG1 PE=1 SV=1;>sp|P60712|ACTB_BOVIN Actin, cytoplasmic 1 OS=Bos taurus GN=ACTB PE=1 SV=1	1	108.495	2.36247E-06	118.37	117.18	108.5	1	105.506	8.02457E-05	108.55	1	117.216	2.51304E-06	117.22	1	108.495	2.36247E-06	118.37		1	M	RKDLYANTVLSGGTTMYPGIADRMQKEITAL	X;X;X;X;X;X;X;X;X;X;X;X;X;X;X;Oxidation (M);X;X;X;X;X;X;X;X;X;X;X;X;X;X;X	XPPPPPPPPPPPPPPPPPPPPPPXXXXXXXX	KDLYANTVLSGGTTM(1)YPGIADR	KDLYANTVLSGGTTM(108.5)YPGIADR	15	2	-0.34933	108120000	108120000	0	0	NaN	30166000	NaN	8398100	NaN	11291000	NaN	30166000	0	0	8398100	0
P63258;P60712;F1MRD0	153;153;153	P63258	P63258	>sp|P63258|ACTG_BOVIN Actin, cytoplasmic 2 OS=Bos taurus GN=ACTG1 PE=1 SV=1;>sp|P60712|ACTB_BOVIN Actin, cytoplasmic 1 OS=Bos taurus GN=ACTB PE=1 SV=1;>tr|F1MRD0|F1MRD0_BOVIN Actin, cytoplasmic 1 OS=Bos taurus GN=ACTB PE=3 SV=2	1	80.0198	0.00411498	80.664	80.373	80.02	1	80.6641	0.00468364	80.664					1	80.0198	0.00411498	80.02		1	M	AVLSLYASGRTTGIVMDSGDGVTHTVPIYEG	X;X;X;X;X;X;X;X;X;X;X;X;X;X;X;Oxidation (M);X;X;X;X;X;X;X;X;X;X;X;X;X;X;X	XXXXXXXXXXPPPPPPPPPPPPPPPPPPPPP	TTGIVM(1)DSGDGVTHTVPIYEGYALPHAILR	TTGIVM(80.02)DSGDGVTHTVPIYEGYALPHAILR	6	3	-0.64275	43259000	43259000	0	0	NaN	30208000	NaN	0	NaN	13051000	NaN	30208000	0	0	0	0
Q0P5A1	159	Q0P5A1	Q0P5A1	>sp|Q0P5A1|DCTN3_BOVIN Dynactin subunit 3 OS=Bos taurus GN=DCTN3 PE=2 SV=1	1	49.4229	0.0543091	49.423	25.655	49.423	1	49.4229	0.0543091	49.423											M	TEESKALLEEYNKTTMLLSKQFVQWDELLCQ	X;X;X;X;X;X;X;X;X;X;X;X;X;X;X;Oxidation (M);X;X;X;X;X;X;X;X;X;X;X;X;X;X;X	XXXXXXXXXXXXXPPPPPPPXXXXXXXXXXX	TTM(1)LLSK	TTM(49.42)LLSK	3	2	0.32004	1573200	1573200	0	0	NaN	1573200	NaN	0	NaN	0	NaN	1573200	0	0	0	0
Q27975;Q27965	87;87	Q27975	Q27975	>sp|Q27975|HS71A_BOVIN Heat shock 70 kDa protein 1A OS=Bos taurus GN=HSPA1A PE=1 SV=2;>sp|Q27965|HS71B_BOVIN Heat shock 70 kDa protein 1B OS=Bos taurus GN=HSPA1B PE=2 SV=1	1	81.6763	0.00877491	90.434	78.271	81.676	1	90.4338	0.0536796	90.434	1	81.6763	0.00877491	81.676						1	M	RLIGRKFGDPVVQSDMKHWPFRVINDGDKPK	X;X;X;X;X;X;X;X;X;X;X;X;X;X;X;Oxidation (M);X;X;X;X;X;X;X;X;X;X;X;X;X;X;X	XXXXXXPPPPPPPPPPPXXXXXXXXXXXXXX	FGDPVVQSDM(1)K	FGDPVVQSDM(81.68)K	10	2	-1.1952	6629700	6629700	0	0	NaN	6629700	NaN	0	NaN	0	NaN	6629700	0	0	0	0
Q28115	69	Q28115	Q28115	>sp|Q28115|GFAP_BOVIN Glial fibrillary acidic protein OS=Bos taurus GN=GFAP PE=1 SV=2	1	58.6986	0.00281153	120.33	87.142	58.699	1	58.6986	0.00281153	120.33	1	104.484	0.00507164	104.48	1	99.8552	0.00701161	99.855		2	M	LNSGFKETRASERAEMMELNDRFASYIEKVR	X;Deamidation (NQ);X;X;X;X;X;X;X;X;X;X;X;X;X;Oxidation (M);Oxidation (M);X;X;Deamidation (NQ);X;X;X;X;X;X;X;X;X;X;X	XXXXXXXXXXXXXPPPPPPPPPXXXXXXXXX	AEM(1)M(1)ELNDR	AEM(58.7)M(58.7)ELNDR	3	2	-0.38648	133240000	0	133240000	0	NaN	67072000	NaN	36397000	NaN	28370000	NaN	0	67072000	0	0	36397000
Q28115	70	Q28115	Q28115	>sp|Q28115|GFAP_BOVIN Glial fibrillary acidic protein OS=Bos taurus GN=GFAP PE=1 SV=2	1	58.6986	0.00281153	120.33	87.142	58.699	1	58.6986	0.00281153	120.33	1	104.484	0.00507164	104.48	1	99.8552	0.00701161	99.855		2	M	NSGFKETRASERAEMMELNDRFASYIEKVRF	Deamidation (NQ);X;X;X;X;X;X;X;X;X;X;X;X;X;Oxidation (M);Oxidation (M);X;X;Deamidation (NQ);X;X;X;X;X;X;X;X;X;X;X;X	XXXXXXXXXXXXPPPPPPPPPXXXXXXXXXX	AEM(1)M(1)ELNDR	AEM(58.7)M(58.7)ELNDR	4	2	-0.38648	133240000	0	133240000	0	NaN	67072000	NaN	36397000	NaN	28370000	NaN	0	67072000	0	0	36397000
Q28115	220	Q28115	Q28115	>sp|Q28115|GFAP_BOVIN Glial fibrillary acidic protein OS=Bos taurus GN=GFAP PE=1 SV=2	1	81.9736	1.44512E-05	134.03	132.47	81.974	1	134.025	1.44512E-05	134.03	1	133.461	1.83653E-05	133.46	1	81.9736	5.34745E-05	128.4		1	M	RELQEQLAQQQVHVEMDVAKPDLTAALREIR	X;X;X;X;X;X;X;X;X;X;X;X;X;X;X;Oxidation (M);X;X;X;X;X;X;X;X;X;X;X;X;X;X;X	XPPPPPPPPPPPPPPPPPPPPPPPPPPPXXX	ELQEQLAQQQVHVEM(1)DVAKPDLTAALR	ELQEQLAQQQVHVEM(81.97)DVAKPDLTAALR	15	4	-0.79709	378640000	378640000	0	0	NaN	121080000	NaN	86306000	NaN	62797000	NaN	121080000	0	0	86306000	0
Q28115	338	Q28115	Q28115	>sp|Q28115|GFAP_BOVIN Glial fibrillary acidic protein OS=Bos taurus GN=GFAP PE=1 SV=2	1	135.856	3.9624E-09	195.24	157.24	135.86	1	121.418	0.00038402	121.42	1	195.241	3.9624E-09	195.24	1	135.856	0.000184697	135.86		1	M	ALARLEEEGQSLKDEMARHLQEYQDLLNVKL	X;X;X;X;X;X;X;X;X;X;X;X;X;X;X;Oxidation (M);X;X;X;X;X;X;X;X;X;X;X;X;X;X;X	XXXXPPPPPPPPPPPPPPXXXXXXXXXXXXX	LEEEGQSLKDEM(1)AR	LEEEGQSLKDEM(135.86)AR	12	2	0.21179	226540000	226540000	0	0	5.7922	86182000	4.1523	36655000	3.166	32768000	4.834	86182000	0	0	36655000	0
Q28115	38	Q28115	Q28115	>sp|Q28115|GFAP_BOVIN Glial fibrillary acidic protein OS=Bos taurus GN=GFAP PE=1 SV=2	1	113.102	0.0404467	113.1	56.592	113.1	1	104.764	0.0475619	104.76	1	106.429	0.0404467	106.43	1	113.102	0.0489138	113.1		1	M	GGRRLGPGTRLSLARMPPPLPARVDFSLAGA	X;X;X;X;X;X;X;X;X;X;X;X;X;X;X;Oxidation (M);X;X;X;X;X;X;X;X;X;X;X;X;X;X;X	XXXXXXXXXXXXXXXPPPPPPPPXXXXXXXX	M(1)PPPLPAR	M(113.1)PPPLPAR	1	2	0.31745	70575000	70575000	0	0	NaN	42421000	NaN	13330000	NaN	14824000	NaN	42421000	0	0	13330000	0
Q28115	20	Q28115	Q28115	>sp|Q28115|GFAP_BOVIN Glial fibrillary acidic protein OS=Bos taurus GN=GFAP PE=1 SV=2	1	102.872	0.00776079	102.87	89.472	102.87	1	97.4631	0.0131114	97.463	1	100.022	0.0086244	100.02	1	102.872	0.00776079	102.87		1	M	RVTSATRRSYVSSSEMVVGGRRLGPGTRLSL	X;X;X;X;X;X;X;X;X;X;X;X;X;X;X;Oxidation (M);X;X;X;X;X;X;X;X;X;X;X;X;X;X;X	XXXXXXXPPPPPPPPPPPPPPXXXXXXXXXX	SYVSSSEM(1)VVGGR	SYVSSSEM(102.87)VVGGR	8	2	0.1938	83843000	83843000	0	0	NaN	43915000	NaN	17475000	NaN	13893000	NaN	43915000	0	0	17475000	0
Q28115	246	Q28115	Q28115	>sp|Q28115|GFAP_BOVIN Glial fibrillary acidic protein OS=Bos taurus GN=GFAP PE=1 SV=2	1	60.0624	1.48768E-13	184.83	178.46	60.062	1	106.748	3.0712E-12	153.06	1	60.0624	9.21156E-08	131.31	1	184.825	1.48768E-13	184.83		1	M	LREIRTQYEAVASSNMHEAEEWYRSKFADLN	X;X;X;X;X;X;X;X;X;X;X;X;X;X;Deamidation (NQ);Oxidation (M);X;X;X;X;X;X;X;X;X;X;X;X;X;X;X	XXXXXPPPPPPPPPPPPPPPPPPPXXXXXXX	TQYEAVASSNM(1)HEAEEWYR	TQYEAVASSNM(60.06)HEAEEWYR	11	3	1.5062	290610000	290610000	0	0	NaN	48233000	NaN	23101000	NaN	19863000	NaN	48233000	0	0	23101000	0
Q28115	411	Q28115	Q28115	>sp|Q28115|GFAP_BOVIN Glial fibrillary acidic protein OS=Bos taurus GN=GFAP PE=1 SV=2	1	76.2401	0.0267471	85.554	57.271	76.24	1	85.5541	0.0267471	85.554	1	76.2331	0.0406265	76.233	1	76.2401	0.0516497	76.24		1	M	SEGHLKRNIVVKTVEMRDGEVIKESKQEHKD	X;X;X;X;X;X;X;Deamidation (NQ);X;X;X;X;X;X;X;Oxidation (M);X;X;X;X;X;X;X;X;X;X;X;X;X;X;X	XXXXXXXXXXXXPPPPPPPPPPPXXXXXXXX	TVEM(1)RDGEVIK	TVEM(76.24)RDGEVIK	4	2	-0.12005	13413000	13413000	0	0	NaN	8774600	NaN	2759700	NaN	1878900	NaN	8774600	0	0	2759700	0
Q2HJ86;F2Z4C1;F6RP72;F2Z4K0;Q32KN8;Q3ZCJ7;F1MNF8	413;413;412;413;413;413;413	Q2HJ86	Q2HJ86	>sp|Q2HJ86|TBA1D_BOVIN Tubulin alpha-1D chain OS=Bos taurus GN=TUBA1D PE=1 SV=1;>tr|F2Z4C1|F2Z4C1_BOVIN Uncharacterized protein OS=Bos taurus GN=TUBA1A PE=3 SV=1;>tr|F6RP72|F6RP72_BOVIN Uncharacterized protein (Fragment) OS=Bos taurus GN=TUBA3E PE=3 SV=1;>	1	106.929	3.96928E-06	106.93	105.83	106.93	1	98.5734	0.000106199	98.573	1	106.929	3.96928E-06	106.93	1	106.929	5.88984E-06	106.93		1	M	MYAKRAFVHWYVGEGMEEGEFSEAREDMAAL	Oxidation (M);X;X;X;X;X;X;X;X;X;X;X;X;X;X;Oxidation (M);X;X;X;X;X;X;X;X;X;X;X;X;X;X;X	XXXXXPPPPPPPPPPPPPPPPPPPPXXXXXX	AFVHWYVGEGM(1)EEGEFSEAR	AFVHWYVGEGM(106.93)EEGEFSEAR	11	3	0.23688	72160000	72160000	0	0	NaN	34988000	NaN	18177000	NaN	18995000	NaN	34988000	0	0	18177000	0
Q2HJ86;F2Z4C1;F6RP72;F2Z4K0;Q3ZCJ7;F1MNF8	398;398;397;398;398;398	Q2HJ86	Q2HJ86	>sp|Q2HJ86|TBA1D_BOVIN Tubulin alpha-1D chain OS=Bos taurus GN=TUBA1D PE=1 SV=1;>tr|F2Z4C1|F2Z4C1_BOVIN Uncharacterized protein OS=Bos taurus GN=TUBA1A PE=3 SV=1;>tr|F6RP72|F6RP72_BOVIN Uncharacterized protein (Fragment) OS=Bos taurus GN=TUBA3E PE=3 SV=1;>	1	89.4403	0.00931315	97.957	77.833	89.44	1	85.6723	0.0223259	85.672	1	97.9573	0.00931315	97.957	1	89.4403	0.0168446	89.44		1	M	AIAEAWARLDHKFDLMYAKRAFVHWYVGEGM	X;X;X;X;X;X;X;X;X;X;X;X;X;X;X;Oxidation (M);X;X;X;X;X;X;X;X;X;X;X;X;X;X;Oxidation (M)	XXXXXXXXPPPPPPPPPPPXXXXXXXXXXXX	LDHKFDLM(1)YAK	LDHKFDLM(89.44)YAK	8	3	-0.03063	20570000	20570000	0	0	NaN	13213000	NaN	4600900	NaN	2756000	NaN	13213000	0	0	4600900	0
Q2KJD0;E1B953;Q2T9S0;Q3MHM5;Q3ZBU7	164;164;164;164;164	Q2KJD0;Q2T9S0;Q3MHM5;Q3ZBU7	Q3MHM5	>sp|Q2KJD0|TBB5_BOVIN Tubulin beta-5 chain OS=Bos taurus GN=TUBB5 PE=2 SV=1;>tr|E1B953|E1B953_BOVIN Uncharacterized protein OS=Bos taurus GN=TUBB PE=3 SV=2;>sp|Q2T9S0|TBB3_BOVIN Tubulin beta-3 chain OS=Bos taurus GN=TUBB3 PE=2 SV=1;>sp|Q3MHM5|TBB4B_BOVIN T	1	102.97	0.00733888	113.24	69.737	102.97					1	113.24	0.00733888	113.24	1	102.97	0.00767719	102.97		1	M	TLLISKIREEFPDRIMNTFSVVPSPKVSDTV;TLLISKIREEYPDRIMNTFSVVPSPKVSDTV;TLLISKVREEYPDRIMNTFSVVPSPKVSDTV	X;X;X;X;X;X;X;X;X;X;X;X;X;X;X;Oxidation (M);X;X;X;X;X;X;X;X;X;X;X;X;X;X;X	XXXXXXXXXXXXXXPPPPPPPPPPPPXXXXX	IM(1)NTFSVVPSPK	IM(102.97)NTFSVVPSPK	2	2	-0.70315	16324000	16324000	0	0	NaN	0	NaN	11963000	NaN	4360300	NaN	0	0	0	11963000	0
Q2T9S0	330	Q2T9S0	Q2T9S0	>sp|Q2T9S0|TBB3_BOVIN Tubulin beta-3 chain OS=Bos taurus GN=TUBB3 PE=2 SV=1	1	92.7811	0.012502	92.781	85.119	92.781	1	91.6203	0.012502	91.62					1	92.7811	0.0449822	92.781		1	M	TVFRGRMSMKEVDEQMLAIQSKNSSYFVEWI	X;X;X;X;X;X;X;X;X;X;X;X;X;X;X;Oxidation (M);X;X;X;X;X;X;X;X;X;X;X;X;X;X;X	XXXXXXXXXXPPPPPPPPPPPPXXXXXXXXX	EVDEQM(1)LAIQSK	EVDEQM(92.78)LAIQSK	6	2	-0.67745	9483500	9483500	0	0	NaN	7258500	NaN	0	NaN	2225000	NaN	7258500	0	0	0	0
Q2T9S0	363	Q2T9S0	Q2T9S0	>sp|Q2T9S0|TBB3_BOVIN Tubulin beta-3 chain OS=Bos taurus GN=TUBB3 PE=2 SV=1	1	96.7732	0.00191035	96.773	95.155	96.773					1	96.7732	0.00191035	96.773						1	M	NVKVAVCDIPPRGLKMSSTFIGNSTAIQELF	X;X;X;X;X;X;X;X;X;X;X;X;X;X;X;Oxidation (M);X;X;X;X;X;X;X;X;X;X;X;X;X;X;X	XXXXXXXXXXXXXXXPPPPPPPPPPPPPPPP	M(1)SSTFIGNSTAIQELFK	M(96.77)SSTFIGNSTAIQELFK	1	2	-2.2375	2658300	2658300	0	0	NaN	0	NaN	2658300	NaN	0	NaN	0	0	0	2658300	0
Q3SYW6	547	Q3SYW6	Q3SYW6	>sp|Q3SYW6|EIF3C_BOVIN Eukaryotic translation initiation factor 3 subunit C OS=Bos taurus GN=EIF3C PE=2 SV=1	1	97.2709	0.00160291	97.271	95.653	97.271	1	97.2709	0.00160291	97.271										1	M	EQDQAENEGEDSAVLMERLCKYIYAKDRTDR	X;X;X;X;X;X;X;X;X;X;X;X;X;X;X;Oxidation (M);X;X;X;X;X;X;X;X;X;X;X;X;X;X;X	PPPPPPPPPPPPPPPPPPXXXXXXXXXXXXX	SEQDQAENEGEDSAVLM(1)ER	SEQDQAENEGEDSAVLM(97.27)ER	17	2	0.64211	7486500	7486500	0	0	NaN	7486500	NaN	0	NaN	0	NaN	7486500	0	0	0	0
Q3ZCK1	268	Q3ZCK1	Q3ZCK1	>sp|Q3ZCK1|EIF3L_BOVIN Eukaryotic translation initiation factor 3 subunit L OS=Bos taurus GN=EIF3L PE=2 SV=1	1	95.4772	0.000515333	95.477	86.588	95.477	1	95.4772	0.000515333	95.477										1	M	PESVAGEYGRHSLYKMLGYFSLVGLLRLHSL	X;X;X;X;X;X;X;X;X;X;X;X;X;X;X;Oxidation (M);X;X;X;X;X;X;X;X;X;X;X;X;X;X;X	XXXXXXXXXXXXXXXPPPPPPPPPPPPXXXX	M(1)LGYFSLVGLLR	M(95.48)LGYFSLVGLLR	1	2	-0.94743	0	0	0	0	NaN	0	NaN	0	NaN	0	NaN	0	0	0	0	0
[truncated: 35 more columns]
