# Supplementary material for: The ∼16 kDa C-Terminal Sequence of Clathrin Assembly Protein AP180 Is Essential for Efficient Clathrin Binding
Source: PLoS One. 2014 Oct 20;9(10):e110557. doi: 10.1371/journal.pone.0110557 (PMC4203807; doi:10.1371/journal.pone.0110557)
Supplement: Data S2 — Contains the tabulated output of the MaxQuant software from processing the LC-MS/MS data of the tryptic digestion of purified clathrin. (ZIP) [file pone.0110557.s003.zip › txt/peptides.txt]

Sequence	N-term cleavage window	C-term cleavage window	Amino acid before	First amino acid	Second amino acid	Second last amino acid	Last amino acid	Amino acid after	A Count	R Count	N Count	D Count	C Count	Q Count	E Count	G Count	H Count	I Count	L Count	K Count	M Count	F Count	P Count	S Count	T Count	W Count	Y Count	V Count	U Count	Length	Missed cleavages	Mass	Proteins	Leading razor protein	Start position	End position	Unique (Groups)	Unique (Proteins)	Charges	PEP	Score	Experiment 1	Experiment 2	Experiment 3	Intensity	Intensity 1	Intensity 2	Intensity 3	Reverse
AAEQAHLWAELVFLYDKYEEYDNAIITMMNHPTDAWK	VNIPKVLRAAEQAHLW	NHPTDAWKEGQFKDII	R	A	A	W	K	E	6	0	2	3	0	1	4	0	2	2	3	2	2	1	1	0	2	2	3	1	0	37	1	4426.0715	P49951;F1MPU0	P49951	1351	1387	yes	no	3;4	0.0011596	99.562	3	1	2	0	0	0	0
AAKDEVSESR	AKNTDAVRAAKDEVSE	KDEVSESRRLLKAKTL	R	A	A	S	R	R	2	1	0	1	0	0	2	0	0	0	0	1	0	0	0	2	0	0	0	1	0	10	1	1090.5255	P02548	P02548	301	310	yes	yes	2;3	2.7783E-06	165.63	2	2	2	41564000	18554000	16327000	6683600
AAKDEVSESRR	AKNTDAVRAAKDEVSE	DEVSESRRLLKAKTLE	R	A	A	R	R	L	2	2	0	1	0	0	2	0	0	0	0	1	0	0	0	2	0	0	0	1	0	11	2	1246.6266	P02548	P02548	301	311	yes	yes	3	0.00054758	145.09	1	1	1	59089000	41729000	12653000	4706800
AALLELWELR	LTVLSEERAALLELWE	LLELWELRRQQYEQCM	R	A	A	L	R	R	2	1	0	0	0	0	2	0	0	0	4	0	0	0	0	0	0	1	0	0	0	10	0	1212.6867	E1BFB0	E1BFB0	450	459	yes	yes	2	0.0002195	137.98	1		1	6944500	4930000	0	2014400
AAMGELYER	LRQQQAGRAAMGELYE	AMGELYEREVREMRGA	R	A	A	E	R	E	2	1	0	0	0	0	2	1	0	0	1	0	1	0	0	0	0	0	1	0	0	9	0	1038.4804	F1MSQ6	F1MSQ6	136	144	yes	yes	2	0.011558	119.75		1	1	0	0	0	0
AATASPPTDGTSGYSAR	PVSIPEARAATASPPT	GTSGYSARADITDDSP	R	A	A	A	R	A	4	1	0	1	0	0	0	2	0	0	0	0	0	0	2	3	3	0	1	0	0	17	0	1608.738	F1N3M8;G3MYP5	G3MYP5	1254	1270	no	no	2	3.1609E-08	153.72	1	1	1	106300000	58468000	23984000	23847000
AAVTDVQR	________________	AAVTDVQRLQARVEEL	M	A	A	Q	R	L	2	1	0	1	0	1	0	0	0	0	0	0	0	0	0	0	1	0	0	2	0	8	0	858.45593	Q0P5A1	Q0P5A1	2	9	yes	yes	2	0.027448	89.752	1	1	1	15594000	6783100	4545600	4265800
ADDPSSYMEVVQAANTSGNWEELVK	EAIDSYIKADDPSSYM	GNWEELVKYLQMARKK	K	A	D	V	K	Y	3	0	2	2	0	1	3	1	0	0	1	1	1	0	1	3	1	1	1	3	0	25	0	2739.2334	P49951;F1MPU0	P49951	1131	1155	yes	no	2	0.00032281	88.976	1	2		111550000	77565000	33982000	0
ADITDDSPDGKLPASSFSPTALLGEGR	GTSGYSARADITDDSP	TALLGEGRHSPGVITS	R	A	D	G	R	H	3	1	0	4	0	0	1	3	0	1	3	1	0	1	3	4	2	0	0	0	0	27	1	2716.3192	F1N3M8;G3MYP5	G3MYP5	1271	1297	no	no	2	0.011294	93.166	1	1	1	25852000	14097000	6307400	5447600
ADLEMQIESLTEELAYLKK	LDELTLTKADLEMQIE	EELAYLKKNHEEEMKD	K	A	D	K	K	N	2	0	0	1	0	1	4	0	0	1	4	2	1	0	0	1	1	0	1	0	0	19	1	2223.1345	CON__P13645	CON__P13645	267	285	yes	yes	3	8.0676E-09	156.13	1	1		0	0	0	0
AEAESLYQSK	EDIAQKSKAEAESLYQ	AESLYQSKYEELQITA	K	A	E	S	K	Y	2	0	0	0	0	1	2	0	0	0	1	1	0	0	0	2	0	0	1	0	0	10	0	1124.535	CON__P04264	CON__P04264	367	376	yes	yes	2	0.00010361	160.53			1	4058100	0	0	4058100
AEALEQTIK	KYWALEQKAEALEQTI	EALEQTIKATEQKEKD	K	A	E	I	K	A	2	0	0	0	0	1	2	0	0	1	1	1	0	0	0	0	1	0	0	0	0	9	0	1001.5393	F1N3M8;G3MYP5	G3MYP5	1568	1576	no	no	2	0.0004745	149.72	1	1	1	56019000	28718000	16778000	10523000
AEEVAPKEELAAEAK	EEKKMEEKAEEVAPKE	EELAAEAKVEKPEKAK	K	A	E	A	K	V	5	0	0	0	0	0	5	0	0	0	1	2	0	0	1	0	0	0	0	1	0	15	1	1583.8043	F1MDZ2;O77788	F1MDZ2	597	611	yes	no	2;3	2.3323E-05	143.88	2	1	1	155260000	110240000	24273000	20751000
AEIENYILTYK	LISWQPPRAEIENYIL	ENYILTYKSTDGSRKE	R	A	E	Y	K	S	1	0	1	0	0	0	2	0	0	2	1	1	0	0	0	0	1	0	2	0	0	11	0	1355.6973	E1BKN2	E1BKN2	1066	1076	yes	yes	2	0.00096958	111.63		1	1	21538000	0	13269000	8268800
AEITDAEGLGLK	ELRAAALRAEITDAEG	DAEGLGLKLEDRETVI	R	A	E	L	K	L	2	0	0	1	0	0	2	2	0	1	2	1	0	0	0	0	1	0	0	0	0	12	0	1215.6347	F1MIC9	F1MIC9	896	907	yes	yes	2	0.0045322	98.105	1			5145300	5145300	0	0
AEMMELNDR	KETRASERAEMMELND	EMMELNDRFASYIEKV	R	A	E	D	R	F	1	1	1	1	0	0	2	0	0	0	1	0	2	0	0	0	0	0	0	0	0	9	0	1107.4689	Q28115	Q28115	67	75	yes	yes	2	0.0028115	120.33	2	1	1	0	0	0	0
AEPAEAQSEEEEIEAQGEYDK	EPLPEAARAEPAEAQS	EAQGEYDKLLFRSDTL	R	A	E	D	K	L	4	0	0	1	0	2	8	1	0	1	0	1	0	0	1	1	0	0	1	0	0	21	0	2350.9925	F1MEW3	F1MEW3	1237	1257	yes	yes	2	3.6689E-14	164.94	1	1	1	94119000	43497000	30174000	20448000
AEPAEAQSEEEEIEAQGEYDKLLFR	EPLPEAARAEPAEAQS	EYDKLLFRSDTLQITD	R	A	E	F	R	S	4	1	0	1	0	2	8	1	0	1	2	1	0	1	1	1	0	0	1	0	0	25	1	2880.3301	F1MEW3	F1MEW3	1237	1261	yes	yes	2;3	9.1957E-05	111.11		2	2	72470000	0	37814000	34656000
AEPELDLAVK	AEVEPSKKAEPELDLA	PELDLAVKKAEQGQLD	K	A	E	V	K	K	2	0	0	1	0	0	2	0	0	0	2	1	0	0	1	0	0	0	0	1	0	10	0	1083.5812	F1MEW3	F1MEW3	1040	1049	yes	yes	2	0.022104	76.228	1		1	13729000	9250200	0	4478400
AESLQQEAEVLR	DKEMAEERAESLQQEA	QQEAEVLRERVEELTT	R	A	E	L	R	E	2	1	0	0	0	2	3	0	0	0	2	0	0	0	0	1	0	0	0	1	0	12	0	1371.6994	F1MIC9	F1MIC9	281	292	yes	yes	2	5.8977E-09	198.32	1		1	33471000	28866000	0	4605200
AESPVKEEVPAKPVK	KKAESPVKAESPVKEE	EVPAKPVKVSPEKEAK	K	A	E	V	K	V	2	0	0	0	0	0	3	0	0	0	0	3	0	0	3	1	0	0	0	3	0	15	2	1606.893	F1MDZ2;O77788	F1MDZ2	755	769	yes	no	3;4	0.00045892	120.7	1	2	1	14005000	7416900	4327600	2260300
AFLQGGQEASDIALLLR	SVEVGRLRAFLQGGQE	SDIALLLRDLETSCSD	R	A	F	L	R	D	3	1	0	1	0	2	1	2	0	1	4	0	0	1	0	1	0	0	0	0	0	17	0	1800.9734	F1MIC9	F1MIC9	732	748	yes	yes	2	5.4375E-17	215.23	1	1	1	21335000	12878000	5074000	3383200
AFMTADLPNELIELLEK	EEVSVTVKAFMTADLP	ELIELLEKIVLDNSVF	K	A	F	E	K	I	2	0	1	1	0	0	3	0	0	1	4	1	1	1	1	0	1	0	0	0	0	17	0	1946.0071	P49951;F1MPU0	P49951	994	1010	yes	no	2;3	0.002658	86.005	3	1	1	0	0	0	0
AFSTQMSITAGQK	IRTHAEIKAFSTQMSI	MSITAGQKVTLKANIA	K	A	F	Q	K	V	2	0	0	0	0	2	0	1	0	1	0	1	1	1	0	2	2	0	0	0	0	13	0	1368.6708	F1N757	F1N757	33998	34010	yes	yes	2	0.038856	50.354			1	14724000	0	0	14724000
AFVHWYVGEGMEEGEFSEAR	FDLMYAKRAFVHWYVG	EGEFSEAREDMAALEK	R	A	F	A	R	E	2	1	0	0	0	0	5	3	1	0	0	0	1	2	0	1	0	1	1	2	0	20	0	2329.011	Q2HJ86;F2Z4C1;F6RP72;F2Z4K0;Q32KN8;Q3ZCJ7;F1MNF8	Q2HJ86	403	422	no	no	3	3.9693E-06	106.93	1	1	1	0	0	0	0
AGATLEIK	YSEEKDVRAGATLEIK	AGATLEIKDTVSPVLD	R	A	G	I	K	D	2	0	0	0	0	0	1	1	0	1	1	1	0	0	0	0	1	0	0	0	0	8	0	801.45962	F1N1S2	F1N1S2	1227	1234	yes	yes	2	0.045557	57.59			1	0	0	0	0
AGDSHASEEPEQTEPEQR	PRSSQVPKAGDSHASE	EQTEPEQREPTPYPDE	K	A	G	Q	R	E	2	1	0	1	0	2	5	1	1	0	0	0	0	0	2	2	1	0	0	0	0	18	0	1995.8406	G3MYP5	G3MYP5	1942	1959	yes	yes	2;3	5.9571E-18	212.95	2	2	2	63094000	31974000	16054000	15065000
AGDSHASEEPEQTEPEQREPTPYPDER	PRSSQVPKAGDSHASE	PTPYPDERSFQYADIY	K	A	G	E	R	S	2	2	0	2	0	2	7	1	1	0	0	0	0	0	5	2	2	0	1	0	0	27	1	3080.3231	G3MYP5	G3MYP5	1942	1968	yes	yes	3;4	0.00014017	92.518	2	2	2	60987000	29537000	16995000	14456000
AGEPQDQAVEQK	EVLEEKDKAGEPQDQA	QDQAVEQKGSDSEHRE	K	A	G	Q	K	G	2	0	0	1	0	3	2	1	0	0	0	1	0	0	1	0	0	0	0	1	0	12	0	1298.6103	F1N3M8;G3MYP5	G3MYP5	1396	1407	no	no	2	3.3931E-06	145.29	1	1	1	67393000	35727000	18134000	13532000
AGFAGDQIPK	DNGSGVIKAGFAGDQI	FAGDQIPKYCFPNYVG	K	A	G	P	K	Y	2	0	0	1	0	1	0	2	0	1	0	1	0	1	1	0	0	0	0	0	0	10	0	1002.5134	F2Z4F0	F2Z4F0	23	32	no	no	2	0.0088404	98.04	1	1	1	27602000	17040000	6043800	4519100
AGGVSGTHHPRPGHDPPPLPQPDPR	GDFLPVDKAGGVSGTH	PLPQPDPRPAPPRPDV	K	A	G	P	R	P	1	2	0	2	0	1	0	4	3	0	1	0	0	0	8	1	1	0	0	1	0	25	1	2575.2793	F1N3M8;G3MYP5	G3MYP5	2548	2572	no	no	4	0.015863	71.696	1	1		20160000	14412000	5747400	0
AGLLQR	HIAQLCEKAGLLQRAL	EKAGLLQRALEHFTDL	K	A	G	Q	R	A	1	1	0	0	0	1	0	1	0	0	2	0	0	0	0	0	0	0	0	0	0	6	0	656.39696	P49951;F1MPU0	P49951	620	625	yes	no	2	0.010454	112.88	1	1	1	805940000	295390000	351240000	159300000
AGPELPSGDPAPAPEGPTAPR	SFPSAAPRAGPELPSG	PEGPTAPRTPVEAASS	R	A	G	P	R	T	4	1	0	1	0	0	2	3	0	0	1	0	0	0	7	1	1	0	0	0	0	21	0	1982.9698	E1BP30;F1MQZ0	E1BP30	453	473	yes	no	2	0.023355	60.621	1	1		18418000	12370000	6048200	0
AGTFQAFEQFGQQLLAHGHYASPEIK	HRTEIDARAGTFQAFE	HYASPEIKEKLDVLDQ	R	A	G	I	K	E	4	0	0	0	0	4	2	3	2	1	2	1	0	3	1	1	1	0	1	0	0	26	0	2874.4089	E1BFB0	E1BFB0	1392	1417	yes	yes	4	1.8226E-12	131.94	1	1		54335000	47984000	6350300	0
AHIAQLCEK	QMFTHYDRAHIAQLCE	HIAQLCEKAGLLQRAL	R	A	H	E	K	A	2	0	0	0	1	1	1	0	1	1	1	1	0	0	0	0	0	0	0	0	0	9	0	1011.5172	P49951;F1MPU0	P49951	611	619	yes	no	2	0.00028117	166.07		1		15540000	0	15540000	0
AHMGMFTELAILYSK	EAALGLERAHMGMFTE	ELAILYSKFKPQKMRE	R	A	H	S	K	F	2	0	0	0	0	0	1	1	1	1	2	1	2	1	0	1	1	0	1	0	0	15	0	1710.8473	P49951;F1MPU0	P49951	1312	1326	yes	no	2;3	2.2276E-11	158.93	13	11	15	0	0	0	0
AHTMTDDVTFWK	IEMKSKMKAHTMTDDV	TDDVTFWKWISLNTVA	K	A	H	W	K	W	1	0	0	2	0	0	0	0	1	0	0	1	1	1	0	0	3	1	0	1	0	12	0	1450.6551	P49951;F1MPU0	P49951	101	112	yes	no	2;3	8.0824E-07	196.15	4	2	3	79261000	44232000	19292000	15736000
AIGNIELGIR	VTEEHLRRAIGNIELG	GNIELGIRSWDTNLIE	R	A	I	I	R	S	1	1	1	0	0	0	1	2	0	3	1	0	0	0	0	0	0	0	0	0	0	10	0	1054.6135	F1N1S2	F1N1S2	55	64	yes	yes	2	0.00011297	159.79	1	1	1	19897000	10476000	4992500	4429100
AIIDGVER	IEENLDYKAIIDGVER	AIIDGVERVSRFGKQA	K	A	I	E	R	V	1	1	0	1	0	0	1	1	0	2	0	0	0	0	0	0	0	0	0	1	0	8	0	871.47633	F1MGK5	F1MGK5	195	202	yes	yes	2	0.0010929	128.61	1			18256000	18256000	0	0
AIKELDEWYAR	QEAEWKEKAIKELDEW	ELDEWYARQDEQLQKT	K	A	I	A	R	Q	2	1	0	1	0	0	2	0	0	1	1	1	0	0	0	0	0	1	1	0	0	11	1	1392.7038	P04973	P04973	134	144	yes	yes	2;3	2.1142E-06	169.52	2	2	1	97341000	78076000	12133000	7131500
AIQFYLEFK	ANVELYYRAIQFYLEF	IQFYLEFKPLLLNDLL	R	A	I	F	K	P	1	0	0	0	0	1	1	0	0	1	1	1	0	2	0	0	0	0	1	0	0	9	0	1157.6121	P49951;F1MPU0	P49951	1407	1415	yes	no	2	0.0091866	93.178	1			7811200	7811200	0	0
AKVDFILLK	FVEWTPPRAKVDFILL	KVDFILLKYGLVGGEG	R	A	K	L	K	Y	1	0	0	1	0	0	0	0	0	1	2	2	0	1	0	0	0	0	0	1	0	9	1	1045.6536	E1BKN2	E1BKN2	529	537	yes	yes	2	0.0057142	113.93	1	1	1	30466000	15884000	8531600	6050700
ALAAELNQLR	RFLEQQNKALAAELNQ	AAELNQLRAKEPTKLA	K	A	L	L	R	A	3	1	1	0	0	1	1	0	0	0	3	0	0	0	0	0	0	0	0	0	0	10	0	1097.6193	Q28115	Q28115	92	101	yes	yes	2	4.8383E-05	175.91	1	1	1	270940000	157030000	66985000	46924000
ALALAPGPPAR	SLAFSGDRALALAPGP	LAPGPPARARHDEYLE	R	A	L	A	R	A	4	1	0	0	0	0	0	1	0	0	2	0	0	0	3	0	0	0	0	0	0	11	0	1032.608	G3MYP5	G3MYP5	2209	2219	yes	yes	2	0.0033672	111.61	1	1	1	30073000	15561000	8536200	5975200
ALEAELAALR	HQLETQNRALEAELAA	EAELAALRQRHAEPSR	R	A	L	L	R	Q	4	1	0	0	0	0	2	0	0	0	3	0	0	0	0	0	0	0	0	0	0	10	0	1055.5975	Q08DH7	Q08DH7	121	130	yes	yes	2	2.2241E-05	179.09		1	1	132710000	0	65798000	66907000
ALEESNYELEGK	ASYLDKVRALEESNYE	SNYELEGKIKEWYEKH	R	A	L	G	K	I	1	0	1	0	0	0	4	1	0	0	2	1	0	0	0	1	0	0	1	0	0	12	0	1380.6409	CON__P13645;CON__P02535-1	CON__P13645	166	177	yes	no	2	0.00012533	127.17	1	1	1	133030000	52718000	38976000	41335000
ALEGEEEEETANVQMSEK	GRGLSGERALEGEEEE	ANVQMSEKLHGQYGPP	R	A	L	E	K	L	2	0	1	0	0	1	7	1	0	0	1	1	1	0	0	1	1	0	0	1	0	18	0	2021.8735	F1N3M8;G3MYP5	G3MYP5	929	946	no	no	2	0.049635	72.359	1			0	0	0	0
ALEHFTDLYDIK	EKAGLLQRALEHFTDL	FTDLYDIKRAVVHTHL	R	A	L	I	K	R	1	0	0	2	0	0	1	0	1	1	2	1	0	1	0	0	1	0	1	0	0	12	0	1463.7296	P49951;F1MPU0	P49951	626	637	yes	no	2;3	1.21E-06	163.51	2	2	2	3144800000	1598100000	803190000	743490000
ALEHFTDLYDIKR	EKAGLLQRALEHFTDL	TDLYDIKRAVVHTHLL	R	A	L	K	R	A	1	1	0	2	0	0	1	0	1	1	2	1	0	1	0	0	1	0	1	0	0	13	1	1619.8308	P49951;F1MPU0	P49951	626	638	yes	no	2;3;4	1.2554E-25	301.93	3	3	3	4316200000	2202000000	1260500000	853580000
ALEQEDKVPEGK	RGLEAKDKALEQEDKV	EDKVPEGKDKILAQKI	K	A	L	G	K	D	1	0	0	1	0	1	3	1	0	0	1	2	0	0	1	0	0	0	0	1	0	12	1	1341.6776	G3MYP5	G3MYP5	1484	1495	yes	yes	2;3	7.8289E-05	140.82	2	2	2	34704000	22490000	6992900	5221000
ALEQEDKVPEGKDK	RGLEAKDKALEQEDKV	KVPEGKDKILAQKIRD	K	A	L	D	K	I	1	0	0	2	0	1	3	1	0	0	1	3	0	0	1	0	0	0	0	1	0	14	2	1584.7995	G3MYP5	G3MYP5	1484	1497	yes	yes	2;3	5.2681E-07	181.26	2	2	2	45507000	23003000	12784000	9719900
ALEQKDEASEQDKAPEEK	TVPELKGKALEQKDEA	QDKAPEEKDKAQKDQA	K	A	L	E	K	D	3	0	0	2	0	2	5	0	0	0	1	3	0	0	1	1	0	0	0	0	0	18	2	2043.9597	F1N3M8;G3MYP5	G3MYP5	1524	1541	no	no	3;4	7.9595E-14	212.41	1	2	2	49981000	24475000	14605000	10901000
ALGSDLDSSLASLVGNLGISGTTSK	SPAMAASKALGSDLDS	GISGTTSKKGDLQWNA	K	A	L	S	K	K	2	0	1	2	0	0	0	4	0	1	5	1	0	0	0	6	2	0	0	1	0	25	0	2362.2227	F1MGT4	F1MGT4	702	726	yes	yes	2	4.9638E-19	192.1	1	1	1	22942000	13252000	7082100	2608000
ALSSEGKPYVTKEELYQNLTR	EEIESAFRALSSEGKP	ELYQNLTREQADYCVS	R	A	L	T	R	E	1	1	1	0	0	1	3	1	0	0	3	2	0	0	1	2	2	0	2	1	0	21	2	2425.2489	E1BFB0	E1BFB0	2415	2435	yes	yes	3	5.0071E-09	148.75	1		1	14504000	10977000	0	3526400
ALTNQQEASVER	AHLQDVNRALTNQQEA	QQEASVERQQQPPPET	R	A	L	E	R	Q	2	1	1	0	0	2	2	0	0	0	1	0	0	0	0	1	1	0	0	1	0	12	0	1344.6634	F1MIC9	F1MIC9	496	507	yes	yes	2	1.7315E-07	191.79	1	1	1	19090000	9269500	5022600	4797800
ALTVPELTQQMFDSK	SRGSQQYRALTVPELT	TQQMFDSKNMMAACDP	R	A	L	S	K	N	1	0	0	1	0	2	1	0	0	0	2	1	1	1	1	1	2	0	0	1	0	15	0	1706.8549	E1BJB1;Q6B856	E1BJB1	283	297	yes	no	2	0.0022568	109.07	1	1	1	0	0	0	0
ALVTTHHLMVHGNER	SSWVVVFKALVTTHHL	LMVHGNERFIQYLASR	K	A	L	E	R	F	1	1	1	0	0	0	1	1	3	0	2	0	1	0	0	0	2	0	0	2	0	15	0	1713.8733	F1MGT4	F1MGT4	34	48	yes	yes	4	0.00057824	90.707	1	1	1	0	0	0	0
ALYEQEIR	HSEPSRFRALYEQEIR	ALYEQEIRDLRLAAED	R	A	L	I	R	D	1	1	0	0	0	1	2	0	0	1	1	0	0	0	0	0	0	0	1	0	0	8	0	1020.524	P02548	P02548	137	144	yes	yes	2	0.00040482	173.68	1	1	1	889610000	258590000	566070000	64958000
AMLSANIR	EDSLECLRAMLSANIR	AMLSANIRQNLQICVQ	R	A	M	I	R	Q	2	1	1	0	0	0	0	0	0	1	1	0	1	0	0	1	0	0	0	0	0	8	0	874.46947	P49951;F1MPU0	P49951	669	676	yes	no	2	0.0010958	127.84	1	3	2	28173000	0	14368000	13805000
ANEQLTDELAQK	QEVEDKTRANEQLTDE	LTDELAQKTTTLTTTQ	R	A	N	Q	K	T	2	0	1	1	0	2	2	0	0	0	2	1	0	0	0	0	1	0	0	0	0	12	0	1358.6678	F6RAG5	F6RAG5	511	522	yes	yes	2	3.4874E-06	132.56	1			4827500	4827500	0	0
APHWTSAQLTEASAQPHPPEIK	DDRKDEAKAPHWTSAQ	QPHPPEIKDQGGAGEG	K	A	P	I	K	D	4	0	0	0	0	2	2	0	2	1	1	1	0	0	4	2	2	1	0	0	0	22	0	2395.1921	F1MEW3	F1MEW3	11	32	yes	yes	2;3;4	2.6973E-09	129.98	2	3	2	494440000	247970000	150410000	96056000
APILSDSSCK	PDVLKCLKAPILSDSS	ILSDSSCKSAYPGQIT	K	A	P	C	K	S	1	0	0	1	1	0	0	0	0	1	1	1	0	0	1	3	0	0	0	0	0	10	0	1019.4957	P00760	P00760	163	172	yes	yes	2	0.00039559	123.75			1	2131000	0	0	2131000
APPTLFGHTLGASLEDTKPK	IQGTEEEKAPPTLFGH	SLEDTKPKTEPSLVVP	K	A	P	P	K	T	2	0	0	1	0	0	1	2	1	0	3	2	0	1	3	1	3	0	0	0	0	20	1	2079.1001	F1MEW3	F1MEW3	221	240	yes	yes	3	6.6125E-06	120.79	1	1	1	40593000	24103000	8498000	7991800
AQALLER	LEEASSARAQALLERD	RAQALLERDGLAEEVQ	R	A	Q	E	R	D	2	1	0	0	0	1	1	0	0	0	2	0	0	0	0	0	0	0	0	0	0	7	0	799.4552	Q08DH7	Q08DH7	162	168	yes	yes	2	0.0027282	158.03	1	1	1	92971000	42955000	29744000	20272000
AQALLERDGLAEEVQR	LEEASSARAQALLERD	GLAEEVQRLRARCEEE	R	A	Q	Q	R	L	3	2	0	1	0	2	3	1	0	0	3	0	0	0	0	0	0	0	0	1	0	16	1	1796.9381	Q08DH7	Q08DH7	162	177	yes	yes	2	1.1102E-08	164.01	1		1	20388000	10678000	0	9710000
AQILPIR	________________	MAQILPIRFQEHLQLQ	M	A	Q	I	R	F	1	1	0	0	0	1	0	0	0	2	1	0	0	0	1	0	0	0	0	0	0	7	0	809.51232	P49951	P49951	2	8	yes	yes	1;2	0.0044377	100.07	2	2	1	1529500000	987150000	448310000	94015000
AQLADSFHLQQFFR	HERAMYRRAQLADSFH	FHLQQFFRDSDELKSW	R	A	Q	F	R	D	2	1	0	1	0	3	0	0	1	0	2	0	0	3	0	1	0	0	0	0	0	14	0	1706.8529	E1BFB0	E1BFB0	567	580	yes	yes	3	2.4376E-05	119.39	1			6162800	6162800	0	0
AQLEEASSAR	QRELRDLRAQLEEASS	LEEASSARAQALLERD	R	A	Q	A	R	A	3	1	0	0	0	1	2	0	0	0	1	0	0	0	0	2	0	0	0	0	0	10	0	1060.5149	Q08DH7	Q08DH7	152	161	yes	yes	2	0.00011753	155.26	1	1	1	238900000	131460000	61609000	45834000
AQLEGHTVQSTLQSEEWFR	TSALREIRAQLEGHTV	LQSEEWFRVRLDRLSE	R	A	Q	F	R	V	1	1	0	0	0	3	3	1	1	0	2	0	0	1	0	2	2	1	0	1	0	19	0	2245.0764	F1MSQ6	F1MSQ6	270	288	yes	yes	2;3	2.7664E-27	241.13	2	2	2	265890000	146620000	64926000	54338000
AQLQDLNDR	KSIRTQEKAQLQDLND	QLQDLNDRFASFIERV	K	A	Q	D	R	F	1	1	1	2	0	2	0	0	0	0	2	0	0	0	0	0	0	0	0	0	0	9	0	1071.5309	P02548	P02548	92	100	yes	yes	2	0.00049284	159.28	1	1	1	54964000	0	0	54964000
AQTLPTSVVTITSESSPGKR	QSTPASSRAQTLPTSV	SESSPGKREKDKEKDK	R	A	Q	K	R	E	1	1	0	0	0	1	1	1	0	1	1	1	0	0	2	4	4	0	0	2	0	20	1	2058.0957	F1MYC9	F1MYC9	2325	2344	yes	yes	3	0.021786	57.366	1		1	20782000	14601000	0	6181900
AQVQLDSDHLEEDIHR	LEMVNHEKAQVQLDSD	HLEEDIHRLKERFEEE	K	A	Q	H	R	L	1	1	0	3	0	2	2	0	2	1	2	0	0	0	0	1	0	0	0	1	0	16	0	1903.9024	F1MDZ2;O77788	F1MDZ2	169	184	yes	no	2;3;4	2.0556E-17	223.76	3	3	3	1214300000	676800000	277120000	260340000
AQWGENLQVTLIPTHDTEVTR	LDALLEGKAQWGENLQ	THDTEVTREWYQQTHE	K	A	Q	T	R	E	1	1	1	1	0	2	2	1	1	1	2	0	0	0	1	0	4	1	0	2	0	21	0	2407.2132	F1N3M8;G3MYP5	G3MYP5	2748	2768	no	no	3	0.048208	34.65			1	13378000	0	0	13378000
AQWGSNMQVTLIPTHDSEVMR	LDALLEGKAQWGSNMQ	THDSEVMREWYQETHE	K	A	Q	M	R	E	1	1	1	1	0	2	1	1	1	1	1	0	2	0	1	2	2	1	0	2	0	21	0	2399.1362	F1N1S2	F1N1S2	2408	2428	yes	yes	3	0.030655	49.188	1		1	0	0	0	0
AQYEEIAQR	DSIIAEVKAQYEEIAQ	QYEEIAQRSKEEAEAL	K	A	Q	Q	R	S	2	1	0	0	0	2	2	0	0	1	0	0	0	0	0	0	0	0	1	0	0	9	0	1106.5356	CON__P35908;E1B991;G3MZ71	CON__P35908	360	368	no	no	2	0.01313	100.09	1		1	20803000	14384000	0	6419500
AQYESLAAK	SSALREIRAQYESLAA	QYESLAAKNLQSAEEW	R	A	Q	A	K	N	3	0	0	0	0	1	1	0	0	0	1	1	0	0	0	1	0	0	1	0	0	9	0	979.49746	Q08DH7	Q08DH7	270	278	yes	yes	2	0.0070925	103.55			1	22039000	0	0	22039000
ARESYVETELIFALAK	YLQMARKKARESYVET	ELIFALAKTNRLAELE	K	A	R	A	K	T	3	1	0	0	0	0	3	0	0	1	2	1	0	1	0	1	1	0	1	1	0	16	1	1838.9778	P49951;F1MPU0	P49951	1164	1179	yes	no	2;3	2.0717E-05	136.34	2	2	2	108950000	57266000	28837000	22846000
ARFEELNADLFR	DFYTSITRARFEELNA	ELNADLFRGTLDPVEK	R	A	R	F	R	G	2	2	1	1	0	0	2	0	0	0	2	0	0	2	0	0	0	0	0	0	0	12	1	1479.747	P19120	P19120	300	311	no	no	2;3	7.6817E-44	270.45	2	2	1	34242000	28193000	6048600	0
ARHDEYLEVTK	LAPGPPARARHDEYLE	DEYLEVTKAPSLDSSL	R	A	R	T	K	A	1	1	0	1	0	0	2	0	1	0	1	1	0	0	0	0	1	0	1	1	0	11	1	1359.6783	G3MYP5	G3MYP5	2220	2230	yes	yes	3	2.3305E-05	155.47	1	1	1	28794000	18104000	5687600	5002400
ARVDHGAEIITQSPGR	LNFREHAKARVDHGAE	IITQSPGRSSVASPRR	K	A	R	G	R	S	2	2	0	1	0	1	1	2	1	2	0	0	0	0	1	1	1	0	0	1	0	16	1	1705.886	F1MEW3	F1MEW3	1778	1793	yes	yes	3	0.0020363	94.922	1			19196000	19196000	0	0
ASAFALQEQPVVNAVIDDATK	GFMSAFVKASAFALQE	AVIDDATKEVVYRDYI	K	A	S	T	K	E	5	0	1	2	0	2	1	0	0	1	1	1	0	1	1	1	1	0	0	3	0	21	0	2186.1219	P11179	P11179	289	309	yes	yes	2	0.0025703	69.088			1	3015600	0	0	3015600
ASAFNSWFENAEEDLTDPVR	LFLTFAKKASAFNSWF	EDLTDPVRCNSLEEIK	K	A	S	V	R	C	3	1	2	2	0	0	3	0	0	0	1	0	0	2	1	2	1	1	0	1	0	20	0	2297.0237	E1BFB0	E1BFB0	2100	2119	yes	yes	2	1.5151E-08	136.49	1	1	1	3118800	1612900	793160	712750
ASDKLDTVLEK	REFDQEKKASDKLDTV	KLDTVLEKSEEHADSK	K	A	S	E	K	S	1	0	0	2	0	0	1	0	0	0	2	2	0	0	0	1	1	0	0	1	0	11	1	1217.6503	F1MEW3	F1MEW3	959	969	yes	yes	2;3	4.1299E-09	228.78	1	2	1	65938000	30816000	23787000	11334000
ASDKLDTVLEKSEEHADSK	REFDQEKKASDKLDTV	SEEHADSKEHAKETEE	K	A	S	S	K	E	2	0	0	3	0	0	3	0	1	0	2	3	0	0	0	3	1	0	0	1	0	19	2	2101.0175	F1MEW3	F1MEW3	959	977	yes	yes	3;4	6.3483E-09	179.07	2	2	2	59850000	34110000	15648000	10092000
ASGPIDHYR	SISLIWTKASGPIDHY	SGPIDHYRITFTPSSG	K	A	S	Y	R	I	1	1	0	1	0	0	0	1	1	1	0	0	0	0	1	1	0	0	1	0	0	9	0	1014.4883	E1BKN2	E1BKN2	709	717	yes	yes	2;3	0.00019221	128.36	2	1	2	30399000	22373000	2842800	5182500
ASISPMDEPVPDSESPIEK	DAKDESERASISPMDE	DSESPIEKVLSPLRSP	R	A	S	E	K	V	1	0	0	2	0	0	3	0	0	2	0	1	1	0	4	4	0	0	0	1	0	19	0	2026.9405	F1N1S2	F1N1S2	1369	1387	yes	yes	2	0.0027177	97.271		1	1	0	0	0	0
ASLAALPPLHVAK	TLKGAQMKASLAALPP	LPPLHVAKLSLPPHEG	K	A	S	A	K	L	4	0	0	0	0	0	0	0	1	0	3	1	0	0	2	1	0	0	0	1	0	13	0	1286.7711	F1MIC9	F1MIC9	1079	1091	yes	yes	2	0.015914	75.739		1	1	6815100	0	3494300	3320800
ASMLFDTMPHHLALNR	SAEPYGFRASMLFDTM	PHHLALNRDLTTPGME	R	A	S	N	R	D	2	1	1	1	0	0	0	0	2	0	3	0	2	1	1	1	1	0	0	0	0	16	0	1852.9076	F1N1S2	F1N1S2	1829	1844	yes	yes	3	0.0023408	86.497	1	1	1	0	0	0	0
ASREEIHEYR	ARSTEAIRASREEIHE	REEIHEYRRQLQARTI	R	A	S	Y	R	R	1	2	0	0	0	0	3	0	1	1	0	0	0	0	0	1	0	0	1	0	0	10	1	1288.616	Q08DH7	Q08DH7	307	316	yes	yes	2;3	8.016E-08	226.93	2	2	2	154070000	87343000	42605000	24120000
ASREEIHEYRR	ARSTEAIRASREEIHE	EEIHEYRRQLQARTIE	R	A	S	R	R	Q	1	3	0	0	0	0	3	0	1	1	0	0	0	0	0	1	0	0	1	0	0	11	2	1444.7171	Q08DH7	Q08DH7	307	317	yes	yes	3;4	0.0010452	134.18	2	2	2	93583000	46231000	29038000	18314000
ASYYVVSGNDPANGEPSR	LDFFRRVRASYYVVSG	PANGEPSRAVLDALLE	R	A	S	S	R	A	2	1	2	1	0	0	1	2	0	0	0	0	0	0	2	3	0	0	2	2	0	18	0	1881.8493	F1N3M8;G3MYP5	G3MYP5	2720	2737	no	no	2	0.0036268	62.94	1		1	0	0	0	0
ATAGDTHLGGEDFDNR	DDGIFEVKATAGDTHL	GGEDFDNRLVNHFVEE	K	A	T	N	R	L	2	1	1	3	0	0	1	3	1	0	1	0	0	1	0	0	2	0	0	0	0	16	0	1674.7234	Q27975;Q27965;P0CB32	Q27975	221	236	no	no	2;3	4.5312E-17	224.59	2	2	2	48203000	23277000	16827000	8099100
ATLEMVNHEK	DQEIRELRATLEMVNH	LEMVNHEKAQVQLDSD	R	A	T	E	K	A	1	0	1	0	0	0	2	0	1	0	1	1	1	0	0	0	1	0	0	1	0	10	0	1170.5703	F1MDZ2;O77788	F1MDZ2	159	168	yes	no	2;3	0.0003581	157.14	2	2	2	0	0	0	0
ATNSSWVVVFK	MADTLFERATNSSWVV	SSWVVVFKALVTTHHL	R	A	T	F	K	A	1	0	1	0	0	0	0	0	0	0	0	1	0	1	0	2	1	1	0	3	0	11	0	1236.6503	F1MGT4	F1MGT4	23	33	yes	yes	2	0.0066339	96.113		1	1	8139700	0	5164500	2975200
ATVLQNQLDESQQER	DILLVVPKATVLQNQL	LDESQQERNDLMQLKL	K	A	T	E	R	N	1	1	1	1	0	4	2	0	0	0	2	0	0	0	0	1	1	0	0	1	0	15	0	1757.8544	Q2KJ21;F1N037	Q2KJ21	146	160	yes	no	2	2.9586E-29	273.61	1	1	1	25141000	11658000	8609900	4873100
AVDDLNLHSYSNLPIWVSK	EILNRVQKAVDDLNLH	NLPIWVSKLDMEIERI	K	A	V	S	K	L	1	0	2	2	0	0	0	0	1	1	3	1	0	0	1	3	0	1	1	2	0	19	0	2170.1059	E1BDX8	E1BDX8	883	901	yes	yes	3	0.058217	29.172		1		4781500	0	4781500	0
AVDVFFPPEAQNDFPVAMQISEKHDVVFLITK	GNQPFPKKAVDVFFPP	DVVFLITKYGYIHLYD	K	A	V	T	K	Y	3	0	1	3	0	2	2	0	1	2	1	2	1	4	3	1	1	0	0	5	0	32	1	3630.8432	P49951;F1MPU0	P49951	247	278	yes	no	4	0.055343	25.239		1		12423000	0	12423000	0
AVEQKEEAVLEK	EKSPEKVKAVEQKEEA	KEEAVLEKSKALGLEE	K	A	V	E	K	S	2	0	0	0	0	1	4	0	0	0	1	2	0	0	0	0	0	0	0	2	0	12	1	1371.7246	F1N3M8;G3MYP5	G3MYP5	1616	1627	no	no	3	0.00020055	105.65	1	1	1	54241000	34063000	10555000	9623200
AVFPSIVGRPR	FAGDDAPRAVFPSIVG	PSIVGRPRHQGVMVGM	R	A	V	P	R	H	1	2	0	0	0	0	0	1	0	1	0	0	0	1	2	1	0	0	0	2	0	11	1	1197.6982	P63258;P60712;F1MRD0	P63258	29	39	no	no	2;3	3.5107E-05	160.77	1	2	2	45281000	21259000	12168000	11854000
AVFVDLEPTVIDEVR	GAGKHVPRAVFVDLEP	PTVIDEVRTGTYRQLF	R	A	V	V	R	T	1	1	0	2	0	0	2	0	0	1	1	0	0	1	1	0	1	0	0	4	0	15	0	1700.8985	Q2HJ86;F2Z4C1;Q3ZCJ7;F1MNF8	Q2HJ86	65	79	no	no	2	3.6411E-06	132.08	1	1	1	110650000	47297000	32482000	30869000
AVLDALLEGK	PANGEPSRAVLDALLE	LDALLEGKAQWGENLQ	R	A	V	G	K	A	2	0	0	1	0	0	1	1	0	0	3	1	0	0	0	0	0	0	0	1	0	10	0	1027.5914	F1N3M8;G3MYP5;F1N1S2	G3MYP5	2738	2747	no	no	2	0.0037114	112.13	1	1	1	92355000	51946000	20609000	19800000
AVNYFSK	SPRLDHTRAVNYFSKV	RAVNYFSKVKQLPLVK	R	A	V	S	K	V	1	0	1	0	0	0	0	0	0	0	0	1	0	1	0	1	0	0	1	1	0	7	0	827.41775	P49951;F1MPU0	P49951	1435	1441	yes	no	2	0.0046302	139.31	3	2	3	1442400000	734290000	421290000	286850000
AYEFAER	EHIGNLDRAYEFAERC	RAYEFAERCNEPAVWS	R	A	Y	E	R	C	2	1	0	0	0	0	2	0	0	0	0	0	0	1	0	0	0	0	1	0	0	7	0	884.40283	P49951;F1MPU0	P49951	1095	1101	yes	no	2	0.002582	158.08	1	1	1	1478400000	777540000	412890000	288010000
DADETKEWIEEK	HEVQRFHRDADETKEW	TKEWIEEKNQALNTDN	R	D	A	E	K	N	1	0	0	2	0	0	4	0	0	1	0	2	0	0	0	0	1	1	0	0	0	12	1	1491.6729	E1BFB0	E1BFB0	1241	1252	yes	yes	2	8.4186E-10	247.14	1	1	1	28844000	20287000	4533500	4023100
DAEAWFNEK	QLAEQNRKDAEAWFNE	AEAWFNEKSKELTTEI	K	D	A	E	K	S	2	0	1	1	0	0	2	0	0	0	0	1	0	1	0	0	0	1	0	0	0	9	0	1108.4825	CON__P13645;P06394;A6QNZ7;Q148H6;CON__Q148H6;CON__Q7Z3Y7;Q0P5J4;CON__Q7Z3Z0;CON__Q7Z3Y8;Q0P5J6	CON__P13645	335	343	yes	no	2	0.00050018	109.44	1	1	1	29500000	13140000	8858500	7502000
DAGTIAGLNVLR	DSQRQATKDAGTIAGL	IAGLNVLRIINEPTAA	K	D	A	L	R	I	2	1	1	1	0	0	0	2	0	1	2	0	0	0	0	0	1	0	0	1	0	12	0	1198.667	P19120	P19120	160	171	yes	yes	2	0.029719	70.195			1	6602000	0	0	6602000
DAGVIAGLNVLR	DSQRQATKDAGVIAGL	IAGLNVLRIINEPTAA	K	D	A	L	R	I	2	1	1	1	0	0	0	2	0	1	2	0	0	0	0	0	0	0	0	2	0	12	0	1196.6877	Q27975;Q27965;P0CB32	Q27975	160	171	yes	no	2	0.0026008	107.11	1			7568400	7568400	0	0
DALEIYKR	EMKKGQCKDALEIYKR	DALEIYKRFLTRMTRV	K	D	A	K	R	F	1	1	0	1	0	0	1	0	0	1	1	1	0	0	0	0	0	0	1	0	0	8	1	1006.5447	F1MGT4	F1MGT4	188	195	yes	yes	2	0.0053353	155.75	1	1	1	23738000	14351000	7444300	1942700
DAMQYASESK	CKKDSLYKDAMQYASE	MQYASESKDTELAEEL	K	D	A	S	K	D	2	0	0	1	0	1	1	0	0	0	0	1	1	0	0	2	0	0	1	0	0	10	0	1128.4757	P49951;F1MPU0	P49951	1536	1545	yes	no	2	0.00039897	140.78	2	2	2	47304000	24244000	13836000	9223800
DAMQYASESKDTELAEELLQWFLQEEKR	CKKDSLYKDAMQYASE	WFLQEEKRECFGACLF	K	D	A	K	R	E	3	1	0	2	0	3	6	0	0	0	4	2	1	1	0	2	1	1	1	0	0	28	2	3386.5977	P49951;F1MPU0	P49951	1536	1563	yes	no	3;4	7.1399E-08	155.8	2	2	2	0	0	0	0
DEASEQDKAPEEKDK	KGKALEQKDEASEQDK	KAPEEKDKAQKDQAPE	K	D	E	D	K	A	2	0	0	3	0	1	4	0	0	0	0	3	0	0	1	1	0	0	0	0	0	15	2	1717.7643	F1N3M8;G3MYP5	G3MYP5	1529	1543	no	no	3	2.0152E-08	180.11	1	1	1	24502000	13552000	6614500	4336000
DFPLNDLLSATELDKIR	NDYNPLMKDFPLNDLL	ATELDKIRQALVAIFT	K	D	F	I	R	Q	1	1	1	3	0	0	1	0	0	1	4	1	0	1	1	1	1	0	0	0	0	17	1	1959.0313	E1BDX8	E1BDX8	337	353	yes	yes	3	0.0012079	91.401	1			1954600	1954600	0	0
DGDKALPEEEPQPSAPAQEAGYSTLAQSHPSDLPEEPSSPQER	DTVSPMHKDGDKALPE	EPSSPQERMFTIDPKV	K	D	G	E	R	M	5	1	0	3	0	4	7	2	1	0	3	1	0	0	8	6	1	0	1	0	0	43	1	4571.0848	F1MEW3	F1MEW3	618	660	yes	yes	4	0.062372	28.261			1	12936000	0	0	12936000
DGEVIKESK	VVKTVEMRDGEVIKES	GEVIKESKQEHKDVM_	R	D	G	S	K	Q	0	0	0	1	0	0	2	1	0	1	0	2	0	0	0	1	0	0	0	1	0	9	1	1003.5186	Q28115	Q28115	413	421	yes	yes	2	0.00020621	167.1	1	1	1	6381500	2855900	2598800	926840
DGLAEEVQR	RAQALLERDGLAEEVQ	GLAEEVQRLRARCEEE	R	D	G	Q	R	L	1	1	0	1	0	1	2	1	0	0	1	0	0	0	0	0	0	0	0	1	0	9	0	1015.4934	Q08DH7	Q08DH7	169	177	yes	yes	2	0.00028005	166.07	1	1	1	163580000	92884000	40100000	30599000
DGQETAFASYDR	YELRVDMRDGQETAFA	TAFASYDRFSVEDNRS	R	D	G	D	R	F	2	1	0	2	0	1	1	1	0	0	0	0	0	1	0	1	1	0	1	0	0	12	0	1358.5739	E1BKN2	E1BKN2	1232	1243	yes	yes	2	1.9994E-06	158.01	1	1	1	31352000	12787000	8515200	10049000
DHGESAHAVYDKFSVGDAR	YELRVDLRDHGESAHA	KFSVGDARTRYRLKVE	R	D	H	A	R	T	3	1	0	3	0	0	1	2	2	0	0	1	0	1	0	2	0	0	1	2	0	19	1	2059.9348	F1MRZ5;F1MRZ6	F1MRZ5	1623	1641	yes	no	4	9.6638E-06	119.8		1	1	4871400	0	2975000	1896400
DIEESSLVK	AAIRALRKDIEESSLV	IEESSLVKVELDKKVQ	K	D	I	V	K	V	0	0	0	1	0	0	2	0	0	1	1	1	0	0	0	2	0	0	0	1	0	9	0	1018.5183	F1MDZ2;O77788	F1MDZ2	209	217	yes	no	2	0.055768	70.028	1			42237000	42237000	0	0
DIEESSLVKVELDKK	AAIRALRKDIEESSLV	VKVELDKKVQSLQDEV	K	D	I	K	K	V	0	0	0	2	0	0	3	0	0	1	2	3	0	0	0	2	0	0	0	2	0	15	2	1730.9302	F1MDZ2;O77788	F1MDZ2	209	223	yes	no	2;3	1.0366E-11	224.06	2	2	2	143150000	66969000	35342000	40841000
DIENQYETQITQIEHEVSSSGQEVQSSAK	QLIAKNRKDIENQYET	QEVQSSAKEVTQLRHG	K	D	I	A	K	E	1	0	1	1	0	5	5	1	1	3	0	1	0	0	0	5	2	0	1	2	0	29	0	3263.5066	CON__P35527	CON__P35527	340	368	yes	yes	3	3.2823E-27	195.73	1	1	1	98750000	41862000	32280000	24608000
DIKPQLELIEDEEKLK	AEEVDVAKDIKPQLEL	IEDEEKLKQTEPVEAY	K	D	I	L	K	Q	0	0	0	2	0	1	4	0	0	2	3	3	0	0	1	0	0	0	0	0	0	16	2	1939.0514	F1N1S2	F1N1S2	850	865	yes	yes	3	0.00038661	111.22	1	1	1	112550000	56836000	37006000	18704000
DIQGTEEEKAPPTLFGHTLGASLEDTKPK	TKTSPDKKDIQGTEEE	SLEDTKPKTEPSLVVP	K	D	I	P	K	T	2	0	0	2	0	1	4	3	1	1	3	3	0	1	3	1	4	0	0	0	0	29	2	3108.5615	F1MEW3	F1MEW3	212	240	yes	yes	3;4	0.00025149	110.9	2	2	2	847740000	492340000	202180000	153220000
DKAGEPQDQAVEQK	KDEVLEEKDKAGEPQD	QDQAVEQKGSDSEHRE	K	D	K	Q	K	G	2	0	0	2	0	3	2	1	0	0	0	2	0	0	1	0	0	0	0	1	0	14	1	1541.7322	F1N3M8;G3MYP5	G3MYP5	1394	1407	no	no	2;3	6.0836E-11	196.97	2	1	2	14393000	8717900	2671000	3003800
DKALEQEDKVPEGK	KDRGLEAKDKALEQED	EDKVPEGKDKILAQKI	K	D	K	G	K	D	1	0	0	2	0	1	3	1	0	0	1	3	0	0	1	0	0	0	0	1	0	14	2	1584.7995	G3MYP5	G3MYP5	1482	1495	yes	yes	2;3	1.7665E-07	193.47	1	2	1	35727000	10625000	15372000	9729900
DKFLEEK	TIKATEQKDKFLEEKD	KDKFLEEKDKTQEQES	K	D	K	E	K	D	0	0	0	1	0	0	2	0	0	0	1	2	0	1	0	0	0	0	0	0	0	7	1	907.4651	F1N3M8	F1N3M8	1626	1632	yes	yes	2	0.0050122	110.41		1	1	2668600	0	0	2668600
DKTQEQESPVQEDK	KATEQKEKDKTQEQES	ESPVQEDKTMAPKEKI	K	D	K	D	K	T	0	0	0	2	0	3	3	0	0	0	0	2	0	0	1	1	1	0	0	1	0	14	1	1659.7588	F1N3M8;G3MYP5	G3MYP5	1584	1597	no	no	2	6.3267E-13	223.7		1	1	4725100	0	2829800	1895200
DKTQEQESPVQEDKTMAPK	KATEQKEKDKTQEQES	EDKTMAPKEKILEEKS	K	D	K	P	K	E	1	0	0	2	0	3	3	0	0	0	0	3	1	0	2	1	2	0	0	1	0	19	2	2188.0318	F1N3M8;G3MYP5	G3MYP5	1584	1602	no	no	3	0.006826	103.9	1	1	1	0	0	0	0
DKVSDGVTK	PSVFKQAKDKVSDGVT	KVSDGVTKSPEKRSSL	K	D	K	T	K	S	0	0	0	2	0	0	0	1	0	0	0	2	0	0	0	1	1	0	0	2	0	9	1	947.49238	F1MEW3	F1MEW3	1534	1542	yes	yes	2	0.00021013	158.94	1	1	1	11703000	5965400	3055100	2682700
DLAALEDKVK	RKHEGLERDLAALEDK	AALEDKVKALCAEADR	R	D	L	V	K	A	2	0	0	2	0	0	1	0	0	0	2	2	0	0	0	0	0	0	0	1	0	10	1	1100.6077	E1BFB0	E1BFB0	303	312	yes	yes	2	0.0014062	133.75	1	1	1	19887000	9629700	5512700	4744800
DLAALGDKVNSLGETAER	RKHEGFERDLAALGDK	SLGETAERLIQSHPES	R	D	L	E	R	L	3	1	1	2	0	0	2	2	0	0	3	1	0	0	0	1	1	0	0	1	0	18	1	1857.9432	E1BFB0	E1BFB0	1281	1298	yes	yes	2	5.0848E-13	197.14		1		7986900	0	7986900	0
DLASVQALLR	MASDDFGRDLASVQAL	ASVQALLRKHEGLERD	R	D	L	L	R	K	2	1	0	1	0	1	0	0	0	0	3	0	0	0	0	1	0	0	0	1	0	10	0	1084.6241	E1BFB0	E1BFB0	286	295	yes	yes	2	9.7143E-05	163.16	1	1	1	13184000	7017800	3056400	3109500
DLATDLSLIEVK	GTDDKARRDLATDLSL	DLSLIEVKLAAAGRVK	R	D	L	V	K	L	1	0	0	2	0	0	1	0	0	1	3	1	0	0	0	1	1	0	0	1	0	12	0	1315.7235	F1MEW3	F1MEW3	910	921	yes	yes	2	3.5952E-06	142.83		1	1	30764000	0	16570000	14194000
DLATGAVPASLKPSK	RYPVATQKDLATGAVP	PASLKPSKIKQRADSK	K	D	L	S	K	I	3	0	0	1	0	0	0	1	0	0	2	2	0	0	2	2	1	0	0	1	0	15	1	1453.814	F1N3M8;G3MYP5	G3MYP5	298	312	no	no	2	4.0216E-05	126.77	1	1	1	147370000	79246000	38378000	29743000
DLEEWNQR	EWREKAKKDLEEWNQR	DLEEWNQRQSEQVEKN	K	D	L	Q	R	Q	0	1	1	1	0	1	2	0	0	0	1	0	0	0	0	0	0	1	0	0	0	8	0	1088.4887	P04975;G3N252	P04975	134	141	yes	no	2	0.00063524	162.5	1	1	2	952150000	386660000	322020000	243460000
DLMSWINGIR	QRFLSDFRDLMSWING	MSWINGIRGLVSSDEL	R	D	L	I	R	G	0	1	1	1	0	0	0	1	0	2	1	0	1	0	0	1	0	1	0	0	0	10	0	1203.607	E1BFB0	E1BFB0	1350	1359	yes	yes	2	9.3857E-05	143.03		1		0	0	0	0
DLSSSEKQEHVK	KDALVRMRDLSSSEKQ	SEKQEHVKLQKLMEKK	R	D	L	V	K	L	0	0	0	1	0	1	2	0	1	0	1	2	0	0	0	3	0	0	0	1	0	12	1	1385.6787	F1MIC9	F1MIC9	342	353	yes	yes	3	0.0037803	99.5	1	1	1	7402400	4316700	1716700	1368900
DLTGQVATPAVK	KQPLATQKDLTGQVAT	QVATPAVKQVKLKQRA	K	D	L	V	K	Q	2	0	0	1	0	1	0	1	0	0	1	1	0	0	1	0	2	0	0	2	0	12	0	1198.6558	F1N1S2	F1N1S2	520	531	yes	yes	2	0.0002246	120.53	1	1	1	43424000	26564000	8815200	8044400
DLTGVQNLR	VSSEDYGRDLTGVQNL	LTGVQNLRKKHKRLEA	R	D	L	L	R	K	0	1	1	1	0	1	0	1	0	0	2	0	0	0	0	0	1	0	0	1	0	9	0	1014.5458	E1BFB0	E1BFB0	1795	1803	yes	yes	2	0.00047662	147.19		1	1	10075000	0	6116700	3958200
DLVAIEAK	RKLTGMERDLVAIEAK	DLVAIEAKLSDLQKEA	R	D	L	A	K	L	2	0	0	1	0	0	1	0	0	1	1	1	0	0	0	0	0	0	0	1	0	8	0	857.48583	F1MYC9	F1MYC9	1004	1011	yes	yes	1	0.015408	69.598			1	677460	0	0	677460
DNLAQDLGTLR	SARLEVERDNLAQDLG	AQDLGTLRQKLQDETN	R	D	N	L	R	Q	1	1	1	2	0	1	0	1	0	0	3	0	0	0	0	0	1	0	0	0	0	11	0	1214.6255	Q28115	Q28115	138	148	yes	yes	2	1.1789E-08	202.03		1	1	25926000	0	14660000	11265000
DNNLLGK	EGERAMTKDNNLLGKF	KDNNLLGKFELTGIPP	K	D	N	G	K	F	0	0	2	1	0	0	0	1	0	0	2	1	0	0	0	0	0	0	0	0	0	7	0	772.40792	P19120	P19120	452	458	no	no	2	0.049402	79.809			1	1255400	0	0	1255400
DNNLLGR	EGERAMTRDNNLLGRF	RDNNLLGRFELSGIPP	R	D	N	G	R	F	0	1	2	1	0	0	0	1	0	0	2	0	0	0	0	0	0	0	0	0	0	7	0	800.41407	Q27975;Q27965;P0CB32	Q27975	452	458	no	no	2	0.0069233	120.45			1	914630	0	0	914630
DPELWGSVLLESNPYR	SRYLVRRKDPELWGSV	LLESNPYRRPLIDQVV	K	D	P	Y	R	R	0	1	1	1	0	0	2	1	0	0	3	0	0	0	2	2	0	1	1	1	0	16	0	1873.921	P49951	P49951	952	967	yes	yes	2	6.997E-05	99.344			1	20526000	0	0	20526000
DPHLACVAYER	VGKYCEKRDPHLACVA	LACVAYERGQCDLELI	R	D	P	E	R	G	2	1	0	1	1	0	1	0	1	0	1	0	0	0	1	0	0	0	1	1	0	11	0	1272.5921	P49951;F1MPU0	P49951	913	923	yes	no	2	0.024478	77.062	1			19632000	19632000	0	0
DQAPEGKDEDLEPK	RDTAPDQKDQAPEGKD	KDEDLEPKDRGLEHRD	K	D	Q	P	K	D	1	0	0	3	0	1	3	1	0	0	1	2	0	0	2	0	0	0	0	0	0	14	1	1569.7158	F1N3M8	F1N3M8	1511	1524	yes	yes	2;3	0.0010154	110.84	1	1	2	37056000	22342000	7871600	6842200
DQAPERKDEDLEPK	RETAPDQKDQAPERKD	KDEDLEPKDRGLEHRD	K	D	Q	P	K	D	1	1	0	3	0	1	3	0	0	0	1	2	0	0	2	0	0	0	0	0	0	14	2	1668.7955	F1N3M8;G3MYP5	G3MYP5	1422	1435	no	no	2;3	0.00061394	144.8	2	1	1	32668000	21279000	6336100	5052200
DQASEGKDEDLEPK	PDTALEQKDQASEGKD	KDEDLEPKDRGLEAKD	K	D	Q	P	K	D	1	0	0	3	0	1	3	1	0	0	1	2	0	0	1	1	0	0	0	0	0	14	1	1559.6951	G3MYP5	G3MYP5	1461	1474	yes	yes	2;3	1.4103E-12	199.03	2	2	2	162050000	99008000	35008000	28033000
DQASEGKDEDLEPKDR	PDTALEQKDQASEGKD	EDLEPKDRGLEAKDKA	K	D	Q	D	R	G	1	1	0	4	0	1	3	1	0	0	1	2	0	0	1	1	0	0	0	0	0	16	2	1830.8232	G3MYP5	G3MYP5	1461	1476	yes	yes	3	0.038102	81.713		1		4101000	0	4101000	0
DQGGAGEGLVR	QPHPPEIKDQGGAGEG	GAGEGLVRSANGFPYR	K	D	Q	V	R	S	1	1	0	1	0	1	1	4	0	0	1	0	0	0	0	0	0	0	0	1	0	11	0	1057.5152	F1MEW3	F1MEW3	33	43	yes	yes	2	5.1675E-06	153.88	1	1	1	48275000	20005000	14662000	13607000
DQLQTFSEEHPVLLTEAPLNPR	IWQYVYSKDQLQTFSE	TEAPLNPRKNRERAAE	K	D	Q	P	R	K	1	1	1	1	0	2	3	0	1	0	4	0	0	1	3	1	2	0	0	1	0	22	0	2533.2813	F2Z4F0	F2Z4F0	97	118	yes	yes	3	0.048122	29.842			1	4506100	0	0	4506100
DRGPDSGAETEEEKDTWEEK	VPEERGIKDRGPDSGA	EKDTWEEKKPKEAEGL	K	D	R	E	K	K	1	1	0	3	0	0	6	2	0	0	0	2	0	0	1	1	2	1	0	0	0	20	2	2306.9775	F1N3M8;G3MYP5	G3MYP5	599	618	no	no	2;3;4	5.9907E-23	254.39	2	3	3	135340000	56851000	46480000	32012000
DSLYKDAMQYASESK	QSVELCKKDSLYKDAM	MQYASESKDTELAEEL	K	D	S	S	K	D	2	0	0	2	0	1	1	0	0	0	1	2	1	0	0	3	0	0	2	0	0	15	1	1734.7771	P49951;F1MPU0	P49951	1531	1545	yes	no	2	1.1836E-05	154.46	1	1	1	0	0	0	0
DSSKVEEPQKDQPDK	TGSPATAKDSSKVEEP	PQKDQPDKIAEAPASE	K	D	S	D	K	I	0	0	0	3	0	2	2	0	0	0	0	3	0	0	2	2	0	0	0	1	0	15	2	1728.8166	F1MEW3	F1MEW3	364	378	yes	yes	2;3	2.3889E-30	325.77	2	2	2	130660000	64752000	38124000	27787000
DSYVGDEAQSK	VMVGMGQKDSYVGDEA	VGDEAQSKRGILTLKY	K	D	S	S	K	R	1	0	0	2	0	1	1	1	0	0	0	1	0	0	0	2	0	0	1	1	0	11	0	1197.515	P63258;P60712;F1MRD0	P63258	51	61	no	no	2	0.00022886	126.19	1	1		15775000	11761000	4014500	0
DSYVGDEAQSKR	VMVGMGQKDSYVGDEA	GDEAQSKRGILTLKYP	K	D	S	K	R	G	1	1	0	2	0	1	1	1	0	0	0	1	0	0	0	2	0	0	1	1	0	12	1	1353.6161	P63258;P60712;F1MRD0	P63258	51	62	no	no	2	3.4426E-08	211.37	1	1	1	44178000	22985000	11798000	9395000
DTAPDQKDQAPEGKDEDLEPK	KDRGLEHRDTAPDQKD	KDEDLEPKDRGLEHRD	R	D	T	P	K	D	2	0	0	5	0	2	3	1	0	0	1	3	0	0	3	0	1	0	0	0	0	21	2	2325.0608	F1N3M8	F1N3M8	1504	1524	yes	yes	2;3;4	1.6961E-06	121.46	3	2	2	136990000	88807000	26438000	21744000
DTELAEELLQWFLQEEKR	MQYASESKDTELAEEL	WFLQEEKRECFGACLF	K	D	T	K	R	E	1	1	0	1	0	2	5	0	0	0	4	1	0	1	0	0	1	1	0	0	0	18	1	2276.1325	P49951;F1MPU0	P49951	1546	1563	yes	no	2;3	8.4836E-09	136.34	1	2	1	37465000	12273000	17512000	7679600
DTVSPVLDEK	AGATLEIKDTVSPVLD	VSPVLDEKLSPPKSPS	K	D	T	E	K	L	0	0	0	2	0	0	1	0	0	0	1	1	0	0	1	1	1	0	0	2	0	10	0	1101.5554	F1N1S2	F1N1S2	1235	1244	yes	yes	2	0.0012927	117.28		1	1	3558900	0	2104100	1454800
DVAEEIANYRPTIDSLHEQASALPQEHAESPDVQGR	QSLVKKHKDVAEEIAN	ESPDVQGRLAGIEERY	K	D	V	G	R	L	5	2	1	3	0	3	5	1	2	2	2	0	0	0	3	3	1	0	1	2	0	36	1	3971.8886	F1MYC9	F1MYC9	788	823	yes	yes	4	4.6846E-06	106.3	1	1	1	51151000	20427000	18323000	12401000
DVDGATLAR	RALKAQQRDVDGATLA	VDGATLARLDLEKKVE	R	D	V	A	R	L	2	1	0	2	0	0	0	1	0	0	1	0	0	0	0	0	1	0	0	1	0	9	0	916.46141	Q08DH7	Q08DH7	202	210	yes	yes	2	0.00048849	137.14	1	1	1	143530000	65859000	39097000	38577000
DVLEDIPK	PLTPMKEKDVLEDIPK	DVLEDIPKWEGKQFDS	K	D	V	P	K	W	0	0	0	2	0	0	1	0	0	1	1	1	0	0	1	0	0	0	0	1	0	8	0	927.49131	F1MEW3	F1MEW3	296	303	yes	yes	1	0.01744	62.464	1			3063300	3063300	0	0
DVLEDIPKWEGK	PLTPMKEKDVLEDIPK	DIPKWEGKQFDSPMPS	K	D	V	G	K	Q	0	0	0	2	0	0	2	1	0	1	1	2	0	0	1	0	0	1	0	1	0	12	1	1427.7296	F1MEW3	F1MEW3	296	307	yes	yes	2	5.5595E-05	147.72	1	1		18297000	12792000	5504500	0
DVNAAIATIK	YRGDVVPKDVNAAIAT	NAAIATIKTKRTIQFV	K	D	V	I	K	T	3	0	1	1	0	0	0	0	0	2	0	1	0	0	0	0	1	0	0	1	0	10	0	1014.571	Q2HJ86;F2Z4C1;F6RP72;F2Z4K0;Q32KN8;Q3ZCJ7;F1MNF8	Q2HJ86	327	336	no	no	2	0.010023	94.363	1	1	1	44378000	26524000	8128600	9725700
DVSSVELLMNNHQGIK	IEAQEKPRDVSSVELL	MNNHQGIKAEIDARND	R	D	V	I	K	A	0	0	2	1	0	1	1	1	1	1	2	1	1	0	0	2	0	0	0	2	0	16	0	1782.8934	F1MYC9	F1MYC9	1941	1956	yes	yes	2	9.5118E-13	204.35	1	1		0	0	0	0
DWFIQMPTEAK	PTAAKEQKDWFIQMPT	IQMPTEAKKDEWGLVA	K	D	W	A	K	K	1	0	0	1	0	1	1	0	0	1	0	1	1	1	1	0	1	1	0	0	0	11	0	1364.6435	F1MEW3	F1MEW3	264	274	yes	yes	2	0.0023391	124.42	1	1	1	0	0	0	0
DYQELMNTK	EDLARLLRDYQELMNT	YQELMNTKLALDLEIA	R	D	Y	T	K	L	0	0	1	1	0	1	1	0	0	0	1	1	1	0	0	0	1	0	1	0	0	9	0	1140.5121	CON__P04264	CON__P04264	464	472	no	no	2	0.0052959	126.31	1	1	1	0	0	0	0
DYQELMNVK	EDLARLLRDYQELMNV	YQELMNVKLALDVEIA	R	D	Y	V	K	L	0	0	1	1	0	1	1	0	0	0	1	1	1	0	0	0	0	0	1	1	0	9	0	1138.5329	CON__P35908	CON__P35908	468	476	no	no	2	0.046606	98.044		1		0	0	0	0
EAALTSEEVGADLEQVEVLQK	LQQWINEKEAALTSEE	EQVEVLQKKFDDFQKD	K	E	A	Q	K	K	3	0	0	1	0	2	5	1	0	0	3	1	0	0	0	1	1	0	0	3	0	21	0	2257.1325	E1BFB0	E1BFB0	1111	1131	yes	yes	2	0.048242	61.862			1	7616600	0	0	7616600
EAASELLMR	DDRHRKNREAASELLM	AASELLMRLKDNRDLQ	R	E	A	M	R	L	2	1	0	0	0	0	2	0	0	0	2	0	1	0	0	1	0	0	0	0	0	9	0	1018.5117	F1MYC9	F1MYC9	1262	1270	yes	yes	2	0.057762	98.009			1	0	0	0	0
EAASYQEALAR	EQEERHAREAASYQEA	SYQEALARLEEEGQSL	R	E	A	A	R	L	4	1	0	0	0	1	2	0	0	0	1	0	0	0	0	1	0	0	1	0	0	11	0	1207.5833	Q28115	Q28115	316	326	yes	yes	2	1.9729E-06	170.02	1	1	1	218150000	115320000	58962000	43873000
EAEEEEKKDEGAGEEQATK	GEEAEETKEAEEEEKK	AGEEQATKKKD_____	K	E	A	T	K	K	3	0	0	1	0	1	8	2	0	0	0	3	0	0	0	0	1	0	0	0	0	19	2	2105.9237	P02548	P02548	534	552	yes	yes	2;3	5.7279E-27	277.98	2	2	2	174030000	91443000	47798000	34790000
EAEGLPDRTEAR	TWEEKKPKEAEGLPDR	LPDRTEAREESEPEVK	K	E	A	A	R	E	2	2	0	1	0	0	3	1	0	0	1	0	0	0	1	0	1	0	0	0	0	12	1	1342.6477	F1N3M8;G3MYP5	G3MYP5	622	633	no	no	2;3	6.1216E-07	188.26	2	2	2	70445000	44563000	14252000	11630000
EAEGLPDRTEAREESEPEVK	TWEEKKPKEAEGLPDR	EESEPEVKEDVIEKAE	K	E	A	V	K	E	2	2	0	1	0	0	7	1	0	0	1	1	0	0	2	1	1	0	0	1	0	20	2	2270.0662	F1N3M8;G3MYP5	G3MYP5	622	641	no	no	3	2.0223E-06	142.23	1	1	1	16115000	8974400	3830200	3310100
EAFLNTEDKGDSLDSVEALIK	AENWMAAREAFLNTED	DSVEALIKKHEDFDKA	R	E	A	I	K	K	2	0	1	3	0	0	3	1	0	1	3	2	0	1	0	2	1	0	0	1	0	21	1	2293.1325	E1BFB0	E1BFB0	1465	1485	yes	yes	3	0.02602	62.617			1	11594000	0	0	11594000
EAIDSYIK	QLQKGMVKEAIDSYIK	EAIDSYIKADDPSSYM	K	E	A	I	K	A	1	0	0	1	0	0	1	0	0	2	0	1	0	0	0	1	0	0	1	0	0	8	0	937.47566	P49951;F1MPU0	P49951	1123	1130	yes	no	2	0.020126	91.318		1	1	634000000	0	329920000	304090000
EAINQGMDEELERDEK	AALQVTVREAINQGMD	EELERDEKVFLLGEEV	R	E	A	E	K	V	1	1	1	2	0	1	5	1	0	1	1	1	1	0	0	0	0	0	0	0	0	16	1	1904.8422	P11966	P11966	37	52	yes	yes	3	0.0019591	101.42		1		0	0	0	0
EANELQQWINEK	CKKFMLFREANELQQW	LQQWINEKEAALTSEE	R	E	A	E	K	E	1	0	2	0	0	2	3	0	0	1	1	1	0	0	0	0	0	1	0	0	0	12	0	1500.7209	E1BFB0	E1BFB0	1099	1110	yes	yes	2	6.8983E-07	165.58		1	1	5442800	0	2462900	2979900
EASPPISGDK	KDEVSAEKEASPPISG	SPPISGDKSGLSREFD	K	E	A	D	K	S	1	0	0	1	0	0	1	1	0	1	0	1	0	0	2	2	0	0	0	0	0	10	0	999.48729	F1MEW3	F1MEW3	937	946	yes	yes	2	0.0045551	110.39	1	1	1	63119000	37037000	15405000	10677000
EAYYSEEKDVR	KFSRSALREAYYSEEK	YSEEKDVRAGATLEIK	R	E	A	V	R	A	1	1	0	1	0	0	3	0	0	0	0	1	0	0	0	1	0	0	2	1	0	11	1	1387.6256	F1N1S2	F1N1S2	1216	1226	yes	yes	2	1.3253E-06	180.97		1		6095000	0	6095000	0
EDAANNYAR	PEQLITGKEDAANNYA	DAANNYARGHYTIGKE	K	E	D	A	R	G	3	1	2	1	0	0	1	0	0	0	0	0	0	0	0	0	0	0	1	0	0	9	0	1022.4417	Q2HJ86;F2Z4C1;F6RP72;F2Z4K0;Q32KN8;Q3ZCJ7;F1MNF8;G5E6J5	Q2HJ86	97	105	no	no	2	0.00016926	161.02		1	1	3935500	0	2358500	1576900
EEIAEYR	KEAIRSAKEEIAEYRR	KEEIAEYRRQLQSKSI	K	E	E	Y	R	R	1	1	0	0	0	0	3	0	0	1	0	0	0	0	0	0	0	0	1	0	0	7	0	908.42396	F1MDZ2;O77788	F1MDZ2	315	321	yes	no	2	0.0049378	134.66		1	1	5672300	0	3158600	2513700
EEIAEYRR	KEAIRSAKEEIAEYRR	EEIAEYRRQLQSKSIE	K	E	E	R	R	Q	1	2	0	0	0	0	3	0	0	1	0	0	0	0	0	0	0	0	1	0	0	8	1	1064.5251	F1MDZ2;O77788	F1MDZ2	315	322	yes	no	2	0.004227	167.23	1	1	1	23075000	13824000	4525300	4725900
EEIHEYR	TEAIRASREEIHEYRR	REEIHEYRRQLQARTI	R	E	E	Y	R	R	0	1	0	0	0	0	3	0	1	1	0	0	0	0	0	0	0	0	1	0	0	7	0	974.44576	Q08DH7	Q08DH7	310	316	yes	yes	2	1.4268E-06	227.47	1	1	1	25437000	13390000	6707500	5339600
EEIHEYRR	TEAIRASREEIHEYRR	EEIHEYRRQLQARTIE	R	E	E	R	R	Q	0	2	0	0	0	0	3	0	1	1	0	0	0	0	0	0	0	0	1	0	0	8	1	1130.5469	Q08DH7	Q08DH7	310	317	yes	yes	2;3	0.0016769	179.17	2	2	2	75603000	38843000	21840000	14920000
EEQTERLEALDANSR	PESIRKWREEQTERLE	EALDANSRKQEAEWKE	R	E	E	S	R	K	2	2	1	1	0	1	4	0	0	0	2	0	0	0	0	1	1	0	0	0	0	15	1	1759.8337	P04973	P04973	110	124	yes	yes	2;3	2.0054E-49	324.6	2	2	2	151130000	86568000	36795000	27763000
EETPGTEWEK	EAFVKESKEETPGTEW	TPGTEWEKVAQLCDFN	K	E	E	E	K	V	0	0	0	0	0	0	4	1	0	0	0	1	0	0	1	0	2	1	0	0	0	10	0	1204.5248	P04975;G3N252	P04975	184	193	yes	no	2	0.00026566	133.23	1	1	1	370020000	189400000	108250000	72377000
EGEVGVPDHSPR	YRKAEEEREGEVGVPD	GVPDHSPRSSQVPKAG	R	E	G	P	R	S	0	1	0	1	0	0	2	2	1	0	0	0	0	0	2	1	0	0	0	2	0	12	0	1277.6	G3MYP5	G3MYP5	1924	1935	yes	yes	2	2.1878E-06	158.04	1			6730800	6730800	0	0
EGLEETLR	KQALQGEREGLEETLR	EGLEETLRNLQARYEE	R	E	G	L	R	N	0	1	0	0	0	0	3	1	0	0	2	0	0	0	0	0	1	0	0	0	0	8	0	945.47673	P02548	P02548	165	172	yes	yes	2	0.000188	190.52	1	1	1	177860000	78544000	66705000	32612000
EGMQLISEKPETEAVVK	EWLDKIEKEGMQLISE	PETEAVVKEKLTGLHK	K	E	G	V	K	E	1	0	0	0	0	1	4	1	0	1	1	2	1	0	1	1	1	0	0	2	0	17	1	1886.9659	F1MYC9	F1MYC9	1336	1352	yes	yes	2	0.0060025	91.317	1	1		0	0	0	0
EGQFKDIITK	NHPTDAWKEGQFKDII	QFKDIITKVANVELYY	K	E	G	T	K	V	0	0	0	1	0	1	1	1	0	2	0	2	0	1	0	0	1	0	0	0	0	10	1	1177.6343	P49951;F1MPU0	P49951	1388	1397	yes	no	2;3	3.9283E-05	184.55	2	1	1	393640000	324930000	38144000	30563000
EGSSEKEEGEQEEEGETEAEGEGEEAAAEAK	AEEGGSEKEGSSEKEE	EEAAAEAKEEKKMEEK	K	E	G	A	K	E	5	0	0	0	0	1	15	5	0	0	0	2	0	0	0	2	1	0	0	0	0	31	1	3253.3026	F1MDZ2;O77788	F1MDZ2	558	588	yes	no	3	0.0065321	87.155		1	1	23205000	0	12159000	11045000
EGSSEKEEGEQEEEGETEAEGEGEEAAAEAKEEK	AEEGGSEKEGSSEKEE	AAEAKEEKKMEEKAEE	K	E	G	E	K	K	5	0	0	0	0	1	17	5	0	0	0	3	0	0	0	2	1	0	0	0	0	34	2	3639.4827	F1MDZ2;O77788	F1MDZ2	558	591	yes	no	4	0.0054674	97.387	1		1	23606000	14626000	0	8980600
EHLELFWSR	KFKPQKMREHLELFWS	HLELFWSRVNIPKVLR	R	E	H	S	R	V	0	1	0	0	0	0	2	0	1	0	2	0	0	1	0	1	0	1	0	0	0	9	0	1215.6037	P49951;F1MPU0	P49951	1334	1342	yes	no	2;3	2.1239E-07	223.08	2	2	2	1781500000	842050000	516170000	423330000
EIEAEIQALR	HYLEQQNKEIEAEIQA	EAEIQALRQKQASHAQ	K	E	I	L	R	Q	2	1	0	0	0	1	3	0	0	2	1	0	0	0	0	0	0	0	0	0	0	10	0	1170.6245	F1MDZ2;O77788	F1MDZ2	128	137	yes	no	2	2.7848E-05	174.41	1	1	1	241430000	128140000	65126000	48164000
EIETYHNLLEGGQEDFESSGAGK	SIKMRLEKEIETYHNL	FESSGAGKIGLGGRGG	K	E	I	G	K	I	1	0	1	1	0	1	5	4	1	1	2	1	0	1	0	2	1	0	1	0	0	23	0	2509.1245	CON__P35527	CON__P35527	450	472	yes	yes	2;3	3.4356E-05	90.308	2	1	2	98360000	54246000	13080000	31035000
EITALAPSTMK	GIADRMQKEITALAPS	ALAPSTMKIKIIAPPE	K	E	I	M	K	I	2	0	0	0	0	0	1	0	0	1	1	1	1	0	1	1	2	0	0	0	0	11	0	1160.6111	P63258;P60712	P63258	316	326	no	no	2	0.059663	89.805	1			0	0	0	0
EKDVLEDIPKWEGK	PGPLTPMKEKDVLEDI	DIPKWEGKQFDSPMPS	K	E	K	G	K	Q	0	0	0	2	0	0	3	1	0	1	1	3	0	0	1	0	0	1	0	1	0	14	2	1684.8672	F1MEW3	F1MEW3	294	307	yes	yes	3	0.014148	82.651	1			14865000	14865000	0	0
EKEPETESKPGEDLK	PAEPLDKKEKEPETES	SKPGEDLKHAALVSEL	K	E	K	L	K	H	0	0	0	1	0	0	5	1	0	0	1	3	0	0	2	1	1	0	0	0	0	15	2	1714.8261	F1MEW3	F1MEW3	179	193	yes	yes	2;3	7.7805E-12	231.21	2	2	2	298810000	160560000	88009000	50241000
EKEPIAASTNR	EDEETWIREKEPIAAS	PIAASTNRGKDLIGVQ	R	E	K	N	R	G	2	1	1	0	0	0	2	0	0	1	0	1	0	0	1	1	1	0	0	0	0	11	1	1214.6255	E1BFB0	E1BFB0	802	812	yes	yes	2	0.00079059	134.3	1	1	1	12674000	7937900	3067500	1668400
EKEPIVGSTDYGKDEDSAEALLK	NEAESWMREKEPIVGS	DSAEALLKKHEALMSD	R	E	K	L	K	K	2	0	0	3	0	0	4	2	0	1	2	3	0	0	1	2	1	0	1	1	0	23	2	2493.2122	E1BFB0	E1BFB0	908	930	yes	yes	3	0.00063655	104.67	1	1	1	33673000	15952000	9985500	7735200
EKGPEPTDEVLQQQGK	KDRPPEQKEKGPEPTD	EVLQQQGKTLEQRDTV	K	E	K	G	K	T	0	0	0	1	0	3	3	2	0	0	1	2	0	0	2	0	1	0	0	1	0	16	1	1781.8796	F1N3M8;G3MYP5	G3MYP5	1352	1367	no	no	2;3	8.9473E-12	205.98	2	2	2	195430000	101210000	54235000	39982000
EKGSGGEEEKGVVTNGLDVSPGDEK	KEEEQETKEKGSGGEE	DVSPGDEKKGGDKSEE	K	E	K	E	K	K	0	0	1	2	0	0	5	6	0	0	1	3	0	0	1	2	1	0	0	3	0	25	2	2516.1878	F1MDZ2;O77788	F1MDZ2	828	852	yes	no	3	0.00026617	114.9			1	0	0	0	0
EKLDVLDQER	HYASPEIKEKLDVLDQ	LDVLDQERADLEKAWV	K	E	K	E	R	A	0	1	0	2	0	1	2	0	0	0	2	1	0	0	0	0	0	0	0	1	0	10	1	1243.6408	E1BFB0	E1BFB0	1418	1427	yes	yes	2	4.5565E-06	215.56	1	1	1	20604000	13798000	3939000	2867100
EKVEEVGGKEEGGLK	PQEKEKEKEKVEEVGG	GKEEGGLKESRKEDIA	K	E	K	L	K	E	0	0	0	0	0	0	5	4	0	0	1	3	0	0	0	0	0	0	0	2	0	15	2	1586.8152	F1MDZ2;O77788	F1MDZ2	790	804	yes	no	2;3	6.4218E-10	216.99	2	2	2	310780000	188280000	73031000	49462000
EKVGEQAQVVIIDMNDPSNPIR	SDKFICIREKVGEQAQ	NDPSNPIRRPISADSA	R	E	K	I	R	R	1	1	2	2	0	2	2	1	0	3	0	1	1	0	2	1	0	0	0	3	0	22	1	2451.2428	P49951;F1MPU0	P49951	42	63	yes	no	3	0.017962	76.015	1	4	2	41845000	0	41845000	0
ELALSSPEDLTQDFEELKR	GAAPLPARELALSSPE	QDFEELKREERELLTE	R	E	L	K	R	E	1	1	0	2	0	1	4	0	0	0	4	1	0	1	1	2	1	0	0	0	0	19	1	2219.0958	F1N3M8;G3MYP5	G3MYP5	518	536	no	no	3	8.9239E-06	106.57		1	1	8970500	0	4506900	4463600
ELDEWYAR	EWKEKAIKELDEWYAR	ELDEWYARQDEQLQKT	K	E	L	A	R	Q	1	1	0	1	0	0	2	0	0	0	1	0	0	0	0	0	0	1	1	0	0	8	0	1080.4876	P04973	P04973	137	144	yes	yes	1;2	0.00043009	130.22	2	1	2	1392300000	833680000	246900000	311690000
ELIDLVLDR	RGHYTIGKELIDLVLD	LIDLVLDRIRKLADQC	K	E	L	D	R	I	0	1	0	2	0	0	1	0	0	1	3	0	0	0	0	0	0	0	0	1	0	9	0	1084.6128	Q2HJ86	Q2HJ86	113	121	yes	yes	2	0.00026066	166.07	1	1	1	30288000	15093000	8579100	6615900
ELIVDAEDTWIR	KSTDGSRKELIVDAED	DAEDTWIRLEGLSEST	K	E	L	I	R	L	1	1	0	2	0	0	2	0	0	2	1	0	0	0	0	0	1	1	0	1	0	12	0	1458.7355	E1BKN2	E1BKN2	1084	1095	yes	yes	2	0.02248	70.089			1	7982700	0	0	7982700
ELQEQLAQQQVHVEMDVAKPDLTAALR	KIHEEEVRELQEQLAQ	PDLTAALREIRTQYEA	R	E	L	L	R	E	4	1	0	2	0	5	3	0	1	0	4	1	1	0	1	0	1	0	0	3	0	27	1	3059.571	Q28115	Q28115	206	232	yes	yes	3;4	1.4451E-05	134.03	1	1	2	0	0	0	0
ELSSEPR	SRATRGEKELSSEPRT	KELSSEPRTPPAQKGA	K	E	L	P	R	T	0	1	0	0	0	0	2	0	0	0	1	0	0	0	1	2	0	0	0	0	0	7	0	816.39775	F1N3M8;G3MYP5	G3MYP5	497	503	no	no	2	0.024151	91.626	1	1		4850300	3367800	1482500	0
EMQFLMQK	LNPVKDSKEMQFLMQK	EMQFLMQKWAGNSKAK	K	E	M	Q	K	W	0	0	0	0	0	2	1	0	0	0	1	1	2	1	0	0	0	0	0	0	0	8	0	1053.4987	F1N3M8;G3MYP5	G3MYP5	211	218	no	no	2	0.031924	71.342	1	1	1	0	0	0	0
EMQYFMQQWTGTNK	LNPVKSSKEMQYFMQQ	QQWTGTNKDKAELILP	K	E	M	N	K	D	0	0	1	0	0	3	1	1	0	0	0	1	2	1	0	0	2	1	1	0	0	14	0	1790.7756	F1N1S2	F1N1S2	433	446	yes	yes	2	0.0059272	69.258		1	1	0	0	0	0
ENPYYDSR	NNPERFLRENPYYDSR	ENPYYDSRVVGKYCEK	R	E	N	S	R	V	0	1	1	1	0	0	1	0	0	0	0	0	0	0	1	1	0	0	2	0	0	8	0	1042.4356	P49951;F1MPU0	P49951	896	903	yes	no	2	0.0010213	141.93	1	1	1	784590000	360980000	201770000	221840000
EPTPYPDER	EQTEPEQREPTPYPDE	PTPYPDERSFQYADIY	R	E	P	E	R	S	0	1	0	1	0	0	2	0	0	0	0	0	0	0	3	0	1	0	1	0	0	9	0	1102.4931	G3MYP5	G3MYP5	1960	1968	yes	yes	2	0.00048436	136.99		1		2264700	0	2264700	0
EQDVVQEWR	KAWEKYQKEQDVVQEW	QDVVQEWRETSPSSRE	K	E	Q	W	R	E	0	1	0	1	0	2	2	0	0	0	0	0	0	0	0	0	0	1	0	2	0	9	0	1187.5571	F1N3M8;G3MYP5	G3MYP5	1650	1658	no	no	2	0.00012236	178.32		1	1	17706000	0	10802000	6903900
EQLMASDDFGR	TISWIKEKEQLMASDD	MASDDFGRDLASVQAL	K	E	Q	G	R	D	1	1	0	2	0	1	1	1	0	0	1	0	1	1	0	1	0	0	0	0	0	11	0	1267.5503	E1BFB0	E1BFB0	275	285	yes	yes	2	0.06188	86.463		1	1	0	0	0	0
EQLQGLNDR	KLSRSNEKEQLQGLND	QLQGLNDRFAGYIEKV	K	E	Q	D	R	F	0	1	1	1	0	2	1	1	0	0	2	0	0	0	0	0	0	0	0	0	0	9	0	1071.5309	F1MDZ2;Q08DH7	F1MDZ2	103	111	no	no	2	0.0042314	109.66	1	1		240170000	160570000	79598000	0
EQLQVLNDR	VVVARSEKEQLQVLND	QLQVLNDRFAGYIDKV	K	E	Q	D	R	F	0	1	1	1	0	2	1	0	0	0	2	0	0	0	0	0	0	0	0	1	0	9	0	1113.5778	F1MSQ6	F1MSQ6	95	103	yes	yes	2	0.00047622	145.23	1	1	1	14771000	7256000	4401300	3113900
ERFEEEAR	EEDIHRLKERFEEEAR	ERFEEEARLRDDTEAA	K	E	R	A	R	L	1	2	0	0	0	0	4	0	0	0	0	0	0	1	0	0	0	0	0	0	0	8	1	1064.4887	F1MDZ2;O77788	F1MDZ2	187	194	yes	no	2;3	0.00010575	204.86	1	2	1	54920000	21685000	26116000	7119100
ERLQEELSQAER	LEVVRQQRERLQEELS	EELSQAERTIDELKEQ	R	E	R	E	R	T	1	2	0	0	0	2	4	0	0	0	2	0	0	0	0	1	0	0	0	0	0	12	1	1486.7376	F1MIC9	F1MIC9	373	384	yes	yes	2	2.4449E-35	335.69	1			7470100	7470100	0	0
ERVEELTTDLEILKAEIEEK	QQEAEVLRERVEELTT	LKAEIEEKGSDGAASS	R	E	R	E	K	G	1	1	0	1	0	0	7	0	0	2	3	2	0	0	0	0	2	0	0	1	0	20	2	2386.2479	F1MIC9	F1MIC9	293	312	yes	yes	3	8.0867E-19	222.6	1	1	1	25478000	15046000	5392000	5040100
ESEPPKLIDEETNIIQPSTEHTYSK	SDKEAMPKESEPPKLI	STEHTYSKKEEKGQEP	K	E	S	S	K	K	0	0	1	1	0	1	5	0	1	3	1	2	0	0	3	3	3	0	1	0	0	25	1	2884.3978	F1MEW3	F1MEW3	459	483	yes	yes	3	5.5631E-06	125.31	1	1	1	51780000	28468000	10944000	12368000
ESKEETPEVTK	LPSKTVRKESKEETPE	EETPEVTKGLEKAPKV	K	E	S	T	K	G	0	0	0	0	0	0	4	0	0	0	0	2	0	0	1	1	2	0	0	1	0	11	1	1275.6194	F1N1S2	F1N1S2	560	570	yes	yes	2	0.00024747	136.93	1			1607700	1607700	0	0
ESKEETPGTEWEK	ASEEAFVKESKEETPG	TPGTEWEKVAQLCDFN	K	E	S	E	K	V	0	0	0	0	0	0	5	1	0	0	0	2	0	0	1	1	2	1	0	0	0	13	1	1548.6944	P04975;G3N252	P04975	181	193	yes	no	2;3	1.2506E-13	249.3	2	2	2	2201200000	922730000	735750000	542770000
ESLKPAAKPLPSK	LKQRADSRESLKPAAK	AAKPLPSKTVRKESKE	R	E	S	S	K	T	2	0	0	0	0	0	1	0	0	0	2	3	0	0	3	2	0	0	0	0	0	13	2	1364.8028	F1N1S2	F1N1S2	543	555	yes	yes	2;3	0.00055717	158.31	2	2	1	71702000	46737000	17054000	7911500
ESNCYDPERVK	KEVERICRESNCYDPE	CYDPERVKNFLKEAKL	R	E	S	V	K	N	0	1	1	1	1	0	2	0	0	0	0	1	0	0	1	1	0	0	1	1	0	11	1	1338.5874	P49951;F1MPU0	P49951	750	760	yes	no	2	1.9597E-06	173.04		1	1	5352700	0	2741100	2611600
ESPEVLLTLDILK	LYRIQEKRESPEVLLT	LLTLDILKHGKRFHAT	R	E	S	L	K	H	0	0	0	1	0	0	2	0	0	1	4	1	0	0	1	1	1	0	0	1	0	13	0	1468.8389	E1BDX8	E1BDX8	292	304	yes	yes	2	0.0044739	83.243	1			2936300	2936300	0	0
ESSPLYSPSLSDSTSAVK	DISPLTPRESSPLYSP	SDSTSAVKDSTAACHT	R	E	S	V	K	D	1	0	0	1	0	0	1	0	0	0	2	1	0	0	2	7	1	0	1	1	0	18	0	1853.8895	F1N1S2	F1N1S2	1786	1803	yes	yes	2	0.023207	56.819		1		15535000	0	15535000	0
ESTFLDEGPDDEQEVPPLEHTPQSPWASDFK	RPRYTEERESTFLDEG	SPWASDFKGFQEPAPQ	R	E	S	F	K	G	1	0	0	4	0	2	5	1	1	0	2	1	0	2	5	3	2	1	0	1	0	31	0	3526.5689	G3MYP5	G3MYP5	1733	1763	yes	yes	3	0.026336	49.967		1	1	96989000	0	45702000	51288000
ESVQEAFDTVSPMHK	YYELSDTRESVQEAFD	DTVSPMHKDGDKALPE	R	E	S	H	K	D	1	0	0	1	0	1	2	0	1	0	0	1	1	1	1	2	1	0	0	2	0	15	0	1703.7825	F1MEW3	F1MEW3	603	617	yes	yes	2	4.9056E-05	140.27	1	1	1	0	0	0	0
ESYVETELIFALAK	QMARKKARESYVETEL	ELIFALAKTNRLAELE	R	E	S	A	K	T	2	0	0	0	0	0	3	0	0	1	2	1	0	1	0	1	1	0	1	1	0	14	0	1611.8396	P49951;F1MPU0	P49951	1166	1179	yes	no	2	4.4924E-10	167.73	3	3	2	1347100000	751180000	310450000	285470000
ETAPDQKDQAPER	KGSDSEHRETAPDQKD	QKDQAPERKDEDLEPK	R	E	T	E	R	K	2	1	0	2	0	2	2	0	0	0	0	1	0	0	2	0	1	0	0	0	0	13	1	1483.6903	F1N3M8;G3MYP5	G3MYP5	1415	1427	no	no	3	0.0012319	96.745		1	1	8946000	0	4360600	4585400
ETPTLSEQESTLAEKEPHLK	KEESVQIKETPTLSEQ	AEKEPHLKLEEKPTIS	K	E	T	L	K	L	1	0	0	0	0	1	5	0	1	0	3	2	0	0	2	2	3	0	0	0	0	20	1	2266.1329	F1MEW3	F1MEW3	424	443	yes	yes	2;3	1.0722E-08	144.33	2	2	2	341550000	161050000	105760000	74734000
ETSLDISSK	LSEESPSKETSLDISS	TSLDISSKQLSPESLG	K	E	T	S	K	Q	0	0	0	1	0	0	1	0	0	1	1	1	0	0	0	3	1	0	0	0	0	9	0	978.48696	F1N3M8;G3MYP5	G3MYP5	1201	1209	no	no	2	0.039678	79.489	1			4336600	4336600	0	0
ETSPESSLIQDEIAIK	LKADEGKKETSPESSL	IQDEIAIKLSVEIPCA	K	E	T	I	K	L	1	0	0	1	0	1	3	0	0	3	1	1	0	0	1	3	1	0	0	0	0	16	0	1758.8887	F1MEW3	F1MEW3	1163	1178	yes	yes	2	0.001028	98.281		1	1	32471000	0	18352000	14119000
ETVDQVEELRR	NVGLRKIKETVDQVEE	DQVEELRRDLRIKSQE	K	E	T	R	R	D	0	2	0	1	0	1	3	0	0	0	1	0	0	0	0	0	1	0	0	2	0	11	1	1372.6947	E1BDX8	E1BDX8	3210	3220	yes	yes	3	0.046361	47.302			1	2313300	0	0	2313300
EVAAEETAKPGPDK	KSIPGVGKEVAAEETA	TAKPGPDKGALEEEGK	K	E	V	D	K	G	3	0	0	1	0	0	3	1	0	0	0	2	0	0	2	0	1	0	0	1	0	14	1	1440.7096	G3MYP5	G3MYP5	1035	1048	yes	yes	2;3	3.1715E-05	151.3	2	2	2	34116000	20957000	8234200	4924500
EVAAEETAKPGPDKGALEEEGK	KSIPGVGKEVAAEETA	GALEEEGKASPPRSPQ	K	E	V	G	K	A	4	0	0	1	0	0	6	3	0	0	1	3	0	0	2	0	1	0	0	1	0	22	2	2254.0965	G3MYP5	G3MYP5	1035	1056	yes	yes	2;3	3.0684E-08	183.63	2	2	1	45061000	24390000	13027000	7643100
EVDEQMLAIQSK	FRGRMSMKEVDEQMLA	QMLAIQSKNSSYFVEW	K	E	V	S	K	N	1	0	0	1	0	2	2	0	0	1	1	1	1	0	0	1	0	0	0	1	0	12	0	1389.681	Q2T9S0	Q2T9S0	325	336	yes	yes	2	0.012502	92.781	1		1	0	0	0	0
EVDEQMLNVQNK	FRGRMSMKEVDEQMLN	QMLNVQNKNSSYFVEW	K	E	V	N	K	N	0	0	2	1	0	2	2	0	0	0	1	1	1	0	0	0	0	0	0	2	0	12	0	1445.682	Q2KJD0;E1B953;Q3MHM5;E1BJB1;Q6B856	Q3MHM5	325	336	no	no	2	0.00044248	128.85	1		1	0	0	0	0
EVTQLR	QEVQSSAKEVTQLRHG	AKEVTQLRHGVQELEI	K	E	V	L	R	H	0	1	0	0	0	1	1	0	0	0	1	0	0	0	0	0	1	0	0	1	0	6	0	744.413	CON__P35527	CON__P35527	369	374	yes	yes	2	0.039386	85.061	1			3690700	3690700	0	0
EVVAGSHELGQDYEHVTMLQER	LEQWIAEREVVAGSHE	HVTMLQERFREFARDT	R	E	V	E	R	F	1	1	0	1	0	2	4	2	2	0	2	0	1	0	0	1	1	0	1	3	0	22	0	2526.1809	F1MYC9	F1MYC9	1717	1738	yes	yes	3	9.9076E-14	141.36		1	1	0	0	0	0
EVVPDVPEER	EVPVVKEKEVVPDVPE	VPDVPEERGIKDRGPD	K	E	V	E	R	G	0	1	0	1	0	0	3	0	0	0	0	0	0	0	2	0	0	0	0	3	0	10	0	1167.5772	F1N3M8;G3MYP5	G3MYP5	586	595	no	no	2	0.00016172	145.25	1	1	1	63951000	35080000	20052000	8819000
EWYQETHEK	THDSEVMREWYQETHE	WYQETHEKQQDLNIMV	R	E	W	E	K	Q	0	0	0	0	0	1	3	0	1	0	0	1	0	0	0	0	1	1	1	0	0	9	0	1248.5411	F1N1S2	F1N1S2	2429	2437	yes	yes	2	0.00049404	143.03	1	1	1	20505000	11140000	4562600	4802400
EYQDLLNVK	WEMARHLREYQDLLNV	YQDLLNVKMALDIEIA	R	E	Y	V	K	M	0	0	1	1	0	1	1	0	0	0	2	1	0	0	0	0	0	0	1	1	0	9	0	1120.5764	F1MSQ6;O62654;P02548;F1MDZ2;O77788;Q08DH7	F1MDZ2	383	391	no	no	2	0.0045448	107.57	1	1	1	650400000	326700000	173610000	150090000
EYQTQLIQR	PHIRGAIREYQTQLIQ	YQTQLIQRVKDDIESL	R	E	Y	Q	R	V	0	1	0	0	0	3	1	0	0	1	1	0	0	0	0	0	1	0	1	0	0	9	0	1177.6091	E1BDX8	E1BDX8	602	610	yes	yes	2	0.00042453	149.82	1	1	1	16583000	9862600	4233400	2486800
FAALEQPEVER	ESGSHSVRFAALEQPE	LEQPEVERRPSPHAEE	R	F	A	E	R	R	2	1	0	0	0	1	3	0	0	0	1	0	0	1	1	0	0	0	0	1	0	11	0	1287.6459	F1MEW3	F1MEW3	1321	1331	yes	yes	2	3.7472E-05	140.24	1	1	1	247180000	114670000	83622000	48891000
FADLNDAAAR	AEEWYRSKFADLNDAA	DLNDAAARNAELLRQA	K	F	A	A	R	N	4	1	1	2	0	0	0	0	0	0	1	0	0	1	0	0	0	0	0	0	0	10	0	1062.5094	Q28115	Q28115	257	266	yes	yes	1;2	9.9197E-05	163.16	2	1	1	204670000	137730000	37292000	29651000
FAGYIDK	QLQVLNDRFAGYIDKV	RFAGYIDKVRQLEAHN	R	F	A	D	K	V	1	0	0	1	0	0	0	1	0	1	0	1	0	1	0	0	0	0	1	0	0	7	0	812.40685	F1MSQ6	F1MSQ6	104	110	yes	yes	2	0.026005	90.777	1		1	35847000	25085000	0	10762000
FAGYIDKVR	QLQVLNDRFAGYIDKV	AGYIDKVRQLEAHNRS	R	F	A	V	R	Q	1	1	0	1	0	0	0	1	0	1	0	1	0	1	0	0	0	0	1	1	0	9	1	1067.5764	F1MSQ6	F1MSQ6	104	112	yes	yes	2	0.00014263	182.53	1	1	1	23157000	13318000	6206100	3632800
FAGYIEK	QLQGLNDRFAGYIEKV	RFAGYIEKVHYLEQQN	R	F	A	E	K	V	1	0	0	0	0	0	1	1	0	1	0	1	0	1	0	0	0	0	1	0	0	7	0	826.4225	F1MDZ2;O77788	F1MDZ2	112	118	yes	no	2	0.027752	89.55	1	1	1	215470000	119750000	56187000	39539000
FANLNEQAAR	AEEWYKSKFANLNEQA	NLNEQAARSTEAIRAS	K	F	A	A	R	S	3	1	2	0	0	1	1	0	0	0	1	0	0	1	0	0	0	0	0	0	0	10	0	1132.5625	Q08DH7	Q08DH7	291	300	yes	yes	2	2.9102E-05	185.81	2	2	2	183370000	91286000	51706000	40376000
FAQEAEAAR	AATRALARFAQEAEAA	AQEAEAARVELQKKAQ	R	F	A	A	R	V	4	1	0	0	0	1	2	0	0	0	0	0	0	1	0	0	0	0	0	0	0	9	0	991.47231	F1MSQ6	F1MSQ6	201	209	yes	yes	2	0.00030262	164.71	1	1	1	65580000	32675000	20171000	12733000
FASFIDK	QIKTLNNKFASFIDKV	KFASFIDKVRFLEQQN	K	F	A	D	K	V	1	0	0	1	0	0	0	0	0	1	0	1	0	2	0	1	0	0	0	0	0	7	0	826.4225	CON__P35908;CON__Q9R0H5;CON__Q6NXH9;G3MYU2;CON__Q7Z794	CON__P35908	195	201	no	no	2	0.0058548	128.57	1	1	1	13192000	6296300	4501900	2393400
FASFIDKVR	QIKTLNNKFASFIDKV	ASFIDKVRFLEQQNQV	K	F	A	V	R	F	1	1	0	1	0	0	0	0	0	1	0	1	0	2	0	1	0	0	0	1	0	9	1	1081.592	CON__P35908;CON__Q9R0H5;CON__Q6NXH9;G3MYU2;CON__Q7Z794	CON__P35908	195	203	no	no	3	0.00011183	170.24			1	3595200	0	0	3595200
FASFIER	QLQDLNDRFASFIERV	RFASFIERVHELEQQN	R	F	A	E	R	V	1	1	0	0	0	0	1	0	0	1	0	0	0	2	0	1	0	0	0	0	0	7	0	868.4443	P02548	P02548	101	107	yes	yes	2	0.0040986	143	1	1	1	217720000	109600000	51014000	57106000
FASYIEK	EMMELNDRFASYIEKV	RFASYIEKVRFLEQQN	R	F	A	E	K	V	1	0	0	0	0	0	1	0	0	1	0	1	0	1	0	1	0	0	1	0	0	7	0	856.43307	Q28115	Q28115	76	82	yes	yes	2	0.030708	87.323	1	1	1	51583000	28608000	14063000	8911400
FAVFIEK	QLQGLNDRFAVFIEKV	RFAVFIEKVHQLETQN	R	F	A	E	K	V	1	0	0	0	0	0	1	0	0	1	0	1	0	2	0	0	0	0	0	1	0	7	0	852.47454	Q08DH7	Q08DH7	105	111	yes	yes	1	0.0054552	94.262		1	1	12102000	0	6925000	5177400
FDVNTSAVQVLIEHIGNLDR	EAFAIFRKFDVNTSAV	EHIGNLDRAYEFAERC	K	F	D	D	R	A	1	1	2	2	0	1	1	1	1	2	2	0	0	1	0	1	1	0	0	3	0	20	0	2239.1597	P49951;F1MPU0	P49951	1075	1094	yes	no	2;3	1.2031E-43	299.43	2	2	2	113010000	64151000	35092000	13769000
FEEEAR	DIHRLKERFEEEARLR	ERFEEEARLRDDTEAA	R	F	E	A	R	L	1	1	0	0	0	0	3	0	0	0	0	0	0	1	0	0	0	0	0	0	0	6	0	779.34498	F1MDZ2;O77788	F1MDZ2	189	194	yes	no	2	0.0093401	138.38		1	1	9346700	0	5443300	3903400
FEELNADLFR	YTSITRARFEELNADL	ELNADLFRGTLDPVEK	R	F	E	F	R	G	1	1	1	1	0	0	2	0	0	0	2	0	0	2	0	0	0	0	0	0	0	10	0	1252.6088	P19120	P19120	302	311	no	no	2	0.00024998	133.75	1	1		11954000	7846500	4107200	0
FESLEPEMNNQASR	DLEVIQHRFESLEPEM	EMNNQASRVAVVNQIA	R	F	E	S	R	V	1	1	2	0	0	1	3	0	0	0	1	0	1	1	1	2	0	0	0	0	0	14	0	1650.7308	F1MYC9	F1MYC9	891	904	yes	yes	2	3.4637E-07	148.52	1	1	1	0	0	0	0
FGDPVVQSDMK	AKRLIGRKFGDPVVQS	PVVQSDMKHWPFRVIN	K	F	G	M	K	H	0	0	0	2	0	1	0	1	0	0	0	1	1	1	1	1	0	0	0	2	0	11	0	1221.57	Q27975;Q27965	Q27975	78	88	yes	no	2	0.0087749	90.434	1	1		0	0	0	0
FGNPLLVQDVESYDPVLNPVLNR	KNLESALRFGNPLLVQ	VLNPVLNREVRRTGGR	R	F	G	N	R	E	0	1	3	2	0	1	1	1	0	0	4	0	0	1	3	1	0	0	1	4	0	23	0	2597.349	E1BDX8	E1BDX8	3629	3651	yes	yes	2	0.0035357	69.765	1	1	1	12972000	7650000	3577400	1745100
FGQMLGSNMTEFHSQISK	WHKEVLSKFGQMLGSN	EFHSQISKSRQELEQH	K	F	G	S	K	S	0	0	1	0	0	2	1	2	1	1	1	1	2	2	0	3	1	0	0	0	0	18	0	2040.9397	E1BDX8	E1BDX8	1130	1147	yes	yes	3	0.00022095	94.569	1	1	1	0	0	0	0
FILKPAIK	VIHYYSFKFILKPAIK	FILKPAIKYTRPTHLS	K	F	I	I	K	Y	1	0	0	0	0	0	0	0	0	2	1	2	0	1	1	0	0	0	0	0	0	8	1	928.61097	F1MEW3	F1MEW3	1494	1501	yes	yes	2;3	0.033795	89.046	1	2	2	39042000	12231000	16432000	10378000
FIQYLASR	LMVHGNERFIQYLASR	FIQYLASRNTLFNLSN	R	F	I	S	R	N	1	1	0	0	0	1	0	0	0	1	1	0	0	1	0	1	0	0	1	0	0	8	0	996.53927	F1MGT4;F1N605	F1MGT4	49	56	yes	no	2	0.00098927	150.05	1		1	12418000	10051000	0	2367600
FLEQQNK	ASYIEKVRFLEQQNKA	RFLEQQNKALAAELNQ	R	F	L	N	K	A	0	0	1	0	0	2	1	0	0	0	1	1	0	1	0	0	0	0	0	0	0	7	0	905.46068	Q28115;F1N566;CON__H-INV:HIT000292931;CON__Q61726;E1B898;CON__O43790;CON__Q6NT21;CON__P78385;A6QP32;A4FUZ0;Q148H4;CON__Q14533;Q0VD04;CON__P78386;CON__Q8N1N4-2;CON__Q7RTT2;A6QNX5	Q28115	85	91	no	no	2	0.0067186	119.57	1	1	1	105530000	59037000	20997000	25494000
FLEQQNQVLQTK	ASFIDKVRFLEQQNQV	QNQVLQTKWELLQQVD	R	F	L	T	K	W	0	0	1	0	0	4	1	0	0	0	2	1	0	1	0	0	1	0	0	1	0	12	0	1474.778	CON__P04264;CON__P35908;CON__Q9R0H5;CON__Q6NXH9;G3MYU2;CON__Q7Z794;E1B991;G3MZ71	CON__P04264	200	211	no	no	2	6.1185E-07	169.58	1	1	1	342520000	207550000	70492000	64485000
FMELLEPLNER	KRLTVQTKFMELLEPL	LLEPLNERKQNLLASK	K	F	M	E	R	K	0	1	1	0	0	0	3	0	0	0	3	0	1	1	1	0	0	0	0	0	0	11	0	1389.6962	F1MYC9	F1MYC9	1467	1477	yes	yes	2	0.022897	97.163	1			0	0	0	0
FNALFAQGNYSEAAK	AEELFARKFNALFAQG	GNYSEAAKVAANAPKG	K	F	N	A	K	V	4	0	2	0	0	1	1	1	0	0	1	1	0	2	0	1	0	0	1	0	0	15	0	1629.7787	P49951;F1MPU0	P49951	368	382	yes	no	2	1.1777E-07	160.65	1	1	1	1322500000	962020000	208890000	151540000
FNALFVRPHIR	EMFRIFSRFNALFVRP	LFVRPHIRGAIREYQT	R	F	N	I	R	G	1	2	1	0	0	0	0	0	1	1	1	0	0	2	1	0	0	0	0	1	0	11	1	1368.7779	E1BDX8	E1BDX8	587	597	yes	yes	3	0.062127	32.218	1			2181700	2181700	0	0
FNYGFEYLGVQDK	SIQMANAKFNYGFEYL	EYLGVQDKLVQTPLTD	K	F	N	D	K	L	0	0	1	1	0	1	1	2	0	0	1	1	0	2	0	0	0	0	2	1	0	13	0	1578.7355	E1BDX8	E1BDX8	1866	1878	yes	yes	2	0.0015888	96.464		1	1	4934800	0	2276200	2658600
FQDWDKTSLENTFIHNTGK	NVNLKKLKFQDWDKTS	TFIHNTGKTVEINLTN	K	F	Q	G	K	T	0	0	2	2	0	1	1	1	1	1	1	2	0	2	0	1	3	1	0	0	0	19	1	2280.0811	F1MGK5	F1MGK5	82	100	yes	yes	3;4	4.7413E-22	214.66	2	2	2	110020000	55232000	31190000	23594000
FQEHLQLQNLGINPANIGFSTLTMESDK	MAQILPIRFQEHLQLQ	TLTMESDKFICIREKV	R	F	Q	D	K	F	1	0	3	1	0	3	2	2	1	2	4	1	1	2	1	2	2	0	0	0	0	28	0	3144.555	P49951	P49951	9	36	yes	yes	3	0.00010671	91.1	2	2	2	48759000	20216000	13992000	14551000
FQFFQR	QKLEDSYRFQFFQRDA	YRFQFFQRDAEELEKW	R	F	Q	Q	R	D	0	1	0	0	0	2	0	0	0	0	0	0	0	3	0	0	0	0	0	0	0	6	0	871.43407	E1BFB0	E1BFB0	46	51	yes	yes	2	0.0042508	154.44	1	1	1	12066000	7110300	2653200	2302300
FSPEVPGQK	FVSRHSARFSPEVPGQ	SPEVPGQKILHHRSDV	R	F	S	Q	K	I	0	0	0	0	0	1	1	1	0	0	0	1	0	1	2	1	0	0	0	1	0	9	0	987.50255	F1N1S2	F1N1S2	90	98	yes	yes	2	0.0087324	98.582	1	1	1	26404000	15515000	6381800	4507200
FSSSSGYGGGSSR	GGRGGGGRFSSSSGYG	GYGGGSSRVCGRGGGG	R	F	S	S	R	V	0	1	0	0	0	0	0	4	0	0	0	0	0	1	0	6	0	0	1	0	0	13	0	1234.5214	CON__P35527	CON__P35527	47	59	yes	yes	2	3.6294E-07	171.26	1	1	1	34983000	18646000	7158100	9179000
FSTFAGSITGPLYTHR	LLEGEETRFSTFAGSI	TGPLYTHRQPSIAISS	R	F	S	H	R	Q	1	1	0	0	0	0	0	2	1	1	1	0	0	2	1	2	3	0	1	0	0	16	0	1753.8788	F1MDZ2;O77788	F1MDZ2	412	427	yes	no	2;3	1.0413E-13	212.39	2	2	2	488910000	280410000	119820000	88684000
FSVEDNR	TAFASYDRFSVEDNRS	RFSVEDNRSLYKLRLG	R	F	S	N	R	S	0	1	1	1	0	0	1	0	0	0	0	0	0	1	0	1	0	0	0	1	0	7	0	865.393	E1BKN2	E1BKN2	1244	1250	yes	yes	2	0.0021386	164.89	1	1	1	23012000	12397000	6421100	4193600
FTQDTQPHYIYSPR	FYTMSQERFTQDTQPH	PHYIYSPREMTRWVRG	R	F	T	P	R	E	0	1	0	1	0	2	0	0	1	1	0	0	0	1	2	1	2	0	2	0	0	14	0	1751.8267	E1BDX8	E1BDX8	2784	2797	yes	yes	3	0.0072461	59.68		1		2773100	0	2773100	0
FTVLTESAAK	AEEWFKSRFTVLTESA	VLTESAAKNTDAVRAA	R	F	T	A	K	N	2	0	0	0	0	0	1	0	0	0	1	1	0	1	0	1	2	0	0	1	0	10	0	1065.5706	P02548	P02548	285	294	yes	yes	2	0.0027659	113.93	1	1	1	423280000	222260000	108000000	93014000
FWEVISDEHGIDPTGSYHGDSDLQLER	CGNQIGAKFWEVISDE	DSDLQLERINVYYNEA	K	F	W	E	R	I	0	1	0	4	0	1	3	3	2	2	2	0	0	1	1	3	1	1	1	1	0	27	0	3101.4003	E1BJB1;Q6B856;G3X7R7;G3N1W7	E1BJB1	20	46	yes	no	3	5.6368E-05	99.954	1	1	1	55594000	32201000	13413000	9980500
FWEVISDEHGIDPTGTYHGDSDLQLDR	CGNQIGAKFWEVISDE	DSDLQLDRISVYYNEA	K	F	W	D	R	I	0	1	0	5	0	1	2	3	2	2	2	0	0	1	1	2	2	1	1	1	0	27	0	3101.4003	Q2KJD0	Q2KJD0	20	46	yes	yes	3;4	1.4781E-07	103.33		1	1	23525000	0	13413000	10112000
FWEVISDEHGIDPTGTYHGDSDLQLER	CGNQIGAKFWEVISDE	DSDLQLERINVYYNEA	K	F	W	E	R	I	0	1	0	4	0	1	3	3	2	2	2	0	0	1	1	2	2	1	1	1	0	27	0	3115.4159	Q3MHM5;Q3ZBU7	Q3MHM5	20	46	no	no	3;4	5.3947E-05	98.98	1	2	2	53844000	21937000	18190000	13716000
FYFVGDEDLLEIIGNSK	RERSSFPRFYFVGDED	LEIIGNSKNVAKLQKH	R	F	Y	S	K	N	0	0	1	2	0	0	2	2	0	2	2	1	0	2	0	1	0	0	1	1	0	17	0	1957.9673	E1BDX8	E1BDX8	1628	1644	yes	yes	2	0.0013659	72.433	1	1		4033600	3046100	987520	0
GADEAALAR	GRLMEARKGADEAALA	ADEAALARAELEKRID	K	G	A	A	R	A	4	1	0	1	0	0	1	1	0	0	1	0	0	0	0	0	0	0	0	0	0	9	0	872.43519	P02548	P02548	198	206	yes	yes	2	0.0030466	117.89	1	1	1	24488000	13393000	5754000	5341300
GANESLER	TIEIEGLRGANESLER	GANESLERQILELEER	R	G	A	E	R	Q	1	1	1	0	0	0	2	1	0	0	1	0	0	0	0	1	0	0	0	0	0	8	0	874.41446	Q08DH7	Q08DH7	331	338	yes	yes	2	0.0010784	132.08	1	1	1	85068000	39470000	27533000	18065000
GAQELAASSQQK	EPLKEQLRGAQELAAS	LAASSQQKAALLGEEL	R	G	A	Q	K	A	3	0	0	0	0	3	1	1	0	0	1	1	0	0	0	2	0	0	0	0	0	12	0	1216.6048	Q2KJ21;F1N037	Q2KJ21	347	358	yes	no	2	0.00018756	124.21			1	2016000	0	0	2016000
GDSALFAVNGFNILVDGGSDR	CYIFPGGRGDSALFAV	LVDGGSDRKSCFWKLV	R	G	D	D	R	K	2	1	2	3	0	0	0	4	0	1	2	0	0	2	0	2	0	0	0	2	0	21	0	2123.0283	F1N3M8;G3MYP5	G3MYP5	48	68	no	no	2	3.773E-05	136.49	1	1	2	7389900	5154700	0	2235300
GEIDAHEDSFK	LDRHQEHKGEIDAHED	DAHEDSFKSADESGQA	K	G	E	F	K	S	1	0	0	2	0	0	2	1	1	1	0	1	0	1	0	1	0	0	0	0	0	11	0	1246.5466	E1BFB0	E1BFB0	408	418	yes	yes	2	4.4886E-06	153.54	1			2221600	2221600	0	0
GELSPSFLNPPLPR	AAEPRPHRGELSPSFL	FLNPPLPRSTDDSDPP	R	G	E	P	R	S	0	1	1	0	0	0	1	1	0	0	3	0	0	1	4	2	0	0	0	0	0	14	0	1522.8144	F1N3M8;G3MYP5	G3MYP5	2449	2462	no	no	2	1.7223E-07	137.84	1	1	1	22199000	11086000	6904500	4207600
GFQEPAPQK	SPWASDFKGFQEPAPQ	FQEPAPQKGLEVERWL	K	G	F	Q	K	G	1	0	0	0	0	2	1	1	0	0	0	1	0	1	2	0	0	0	0	0	0	9	0	1000.4978	G3MYP5	G3MYP5	1764	1772	yes	yes	2	0.00049801	125.16	1	1	1	50800000	28542000	11613000	10645000
GFSSGSAVVSGGSR	GGGGGGFRGFSSGSAV	AVVSGGSRRSTSSFSC	R	G	F	S	R	R	1	1	0	0	0	0	0	4	0	0	0	0	0	1	0	5	0	0	0	2	0	14	0	1253.6	CON__P35908	CON__P35908	21	34	no	no	2	7.5584E-08	159.5	1	1	1	39423000	20678000	9926600	8818800
GGGGGGYGSGGSSYGSGGGSYGSGGGGGGGR	TISGGGSRGGGGGGYG	GGGGGGGRGSYGSGGS	R	G	G	G	R	G	0	1	0	0	0	0	0	21	0	0	0	0	0	0	0	6	0	0	3	0	0	31	0	2382.9446	CON__P04264	CON__P04264	519	549	yes	yes	2	1.1484E-10	172.06	1	1	1	31474000	11564000	8756000	11153000
GGGGSFGYSYGGGSGGGFSASSLGGGFGGGSR	GSSRVCGRGGGGSFGY	GGFGGGSRGFGGASGG	R	G	G	S	R	G	1	1	0	0	0	0	0	17	0	0	1	0	0	3	0	7	0	0	2	0	0	32	0	2704.1538	CON__P35527	CON__P35527	64	95	yes	yes	2	0.013937	90.363		1		7660400	0	7660400	0
GGQVQIVTK	DNIKYQPKGGQVQIVT	GQVQIVTKKIDLSHVT	K	G	G	T	K	K	0	0	0	0	0	2	0	2	0	1	0	1	0	0	0	0	1	0	0	2	0	9	0	928.53418	F1MEW3	F1MEW3	1697	1705	yes	yes	2	0.00049834	126.55	1	1	1	109810000	64098000	25918000	19795000
GGSGGGGSISGGGYGSGGGSGGR	GGRQSGSRGGSGGGGS	SGGGSGGRYGSGGGSK	R	G	G	G	R	Y	0	1	0	0	0	0	0	15	0	1	0	0	0	0	0	5	0	0	1	0	0	23	0	1740.7412	CON__P35908	CON__P35908	556	578	yes	yes	2	2.6042E-05	114.39	1		1	6854600	4616200	0	2238400
GGSGGSYGGGGSGGGYGGGSGSR	GSYGRGSRGGSGGSYG	YGGGSGSRGGSGGSYG	R	G	G	S	R	G	0	1	0	0	0	0	0	15	0	0	0	0	0	0	0	5	0	0	2	0	0	23	0	1790.7204	CON__P35527	CON__P35527	491	513	yes	yes	2	2.8258E-28	243.99	1	1	1	40011000	19919000	10049000	10044000
GGSISGGGYGSGGGK	YGSGGGSKGGSISGGG	GYGSGGGKHSSGGGSR	K	G	G	G	K	H	0	0	0	0	0	0	0	9	0	1	0	1	0	0	0	3	0	0	1	0	0	15	0	1196.5422	CON__P35908	CON__P35908	587	601	yes	yes	2	0.014097	79.804		1	1	8581900	0	4647400	3934600
GGSSSGGGYGSGGGGSSSVK	HSSGGGSRGGSSSGGG	GGGSSSVKGSSGEAFG	R	G	G	V	K	G	0	0	0	0	0	0	0	10	0	0	0	1	0	0	0	7	0	0	1	1	0	20	0	1587.6761	CON__P35908	CON__P35908	610	629	yes	yes	2	3.0566E-12	170.38	1		1	4964400	3847300	0	1117100
GHEFSIPFVEMK	GINWYHWKGHEFSIPF	SIPFVEMKMRPYSHRL	K	G	H	M	K	M	0	0	0	0	0	0	2	1	1	1	0	1	1	2	1	1	0	0	0	1	0	12	0	1419.6857	E1BKN2	E1BKN2	1328	1339	yes	yes	2	4.2756E-06	168.98	1	1		0	0	0	0
GHYTEGAELVDAVLDVVR	GAGNNWAKGHYTEGAE	DAVLDVVRKEAESCDC	K	G	H	V	R	K	2	1	0	2	0	0	2	2	1	0	2	0	0	0	0	0	1	0	1	4	0	18	0	1941.9796	Q3ZBU7	Q3ZBU7	104	121	yes	yes	3	7.0863E-13	162.79	1	1	1	9510100	5611600	1856700	2041800
GHYTEGAELVDAVLDVVRK	GAGNNWAKGHYTEGAE	AVLDVVRKEAESCDCL	K	G	H	R	K	E	2	1	0	2	0	0	2	2	1	0	2	1	0	0	0	0	1	0	1	4	0	19	1	2070.0746	Q3ZBU7	Q3ZBU7	104	122	yes	yes	3	2.2796E-18	205.12	1	1	1	24717000	16300000	4900100	3516000
GHYTEGAELVDSVLDVVR	GAGNNWAKGHYTEGAE	DSVLDVVRKEAESCDC	K	G	H	V	R	K	1	1	0	2	0	0	2	2	1	0	2	0	0	0	0	1	1	0	1	4	0	18	0	1957.9745	Q2KJD0;Q3MHM5;G3X7R8;Q2HJ81;E1BJB1;Q6B856;G3X7R7;G3N1W7;Q2T9S0	Q3MHM5	104	121	no	no	2;3	3.809E-27	246.95	2	2	2	138940000	90005000	25154000	23784000
GHYTEGAELVDSVLDVVRK	GAGNNWAKGHYTEGAE	SVLDVVRKEAESCDCL	K	G	H	R	K	E	1	1	0	2	0	0	2	2	1	0	2	1	0	0	0	1	1	0	1	4	0	19	1	2086.0695	Q2KJD0;Q3MHM5;G3X7R8;Q2HJ81;E1BJB1;Q6B856;G3X7R7;G3N1W7;Q2T9S0	Q3MHM5	104	122	no	no	3	3.6407E-22	225.13	1	1	1	48323000	14444000	20677000	13201000
GHYTIGK	DAANNYARGHYTIGKE	RGHYTIGKELIDLVLD	R	G	H	G	K	E	0	0	0	0	0	0	0	2	1	1	0	1	0	0	0	0	1	0	1	0	0	7	0	774.40244	Q2HJ86;F2Z4C1;F6RP72;F2Z4K0;Q32KN8;Q3ZCJ7;F1MNF8	Q2HJ86	106	112	no	no	2	0.002764	158.12	1	1	1	19742000	9200500	6999800	3541300
GIDLTQVK	AKKLAAEKGIDLTQVK	GIDLTQVKGTGPDGRI	K	G	I	V	K	G	0	0	0	1	0	1	0	1	0	1	1	1	0	0	0	0	1	0	0	1	0	8	0	872.49673	F1N690;F1N4X1	F1N690	369	376	yes	no	2	0.01407	95.741	1			7493400	7493400	0	0
GLDFSDR	KDKRVGTKGLDFSDRI	KGLDFSDRIGKTKRTG	K	G	L	D	R	I	0	1	0	2	0	0	0	1	0	0	1	0	0	1	0	1	0	0	0	0	0	7	0	808.37153	Q3ZCF0	Q3ZCF0	66	72	yes	yes	2	0.040045	86.872	1			3216600	3216600	0	0
GLEPGQEYSILLTAEK	DTTSFVLRGLEPGQEY	SILLTAEKGRHKSKPA	R	G	L	E	K	G	1	0	0	0	0	1	3	2	0	1	3	1	0	0	1	1	1	0	1	0	0	16	0	1746.904	F1MRZ5;F1MRZ6	F1MRZ5	1042	1057	yes	no	2	4.6427E-05	117		1	1	6446000	0	2858500	3587500
GLETIANDVVSLATK	IVFNAHIKGLETIAND	DVVSLATKAREGKLQP	K	G	L	T	K	A	2	0	1	1	0	0	1	1	0	1	2	1	0	0	0	1	2	0	0	2	0	15	0	1529.8301	F1N690	F1N690	533	547	yes	yes	2	4.5989E-11	189.1	1	1	1	24363000	13693000	4774800	5895000
GLEVER	FQEPAPQKGLEVERWL	QKGLEVERWLAESPVG	K	G	L	E	R	W	0	1	0	0	0	0	2	1	0	0	1	0	0	0	0	0	0	0	0	1	0	6	0	701.3708	G3MYP5;F1MW90	G3MYP5	1773	1778	no	no		1	NaN				0	0	0	0
GLSSVPEVAEVEPSK	VMAEKAEKGLSSVPEV	VAEVEPSKKAEPELDL	K	G	L	S	K	K	1	0	0	0	0	0	3	1	0	0	1	1	0	0	2	3	0	0	0	3	0	15	0	1526.7828	F1MEW3	F1MEW3	1024	1038	yes	yes	2	0.0020595	85.493	1	1	1	107260000	67915000	22057000	17286000
GLSSVPEVAEVEPSKK	VMAEKAEKGLSSVPEV	AEVEPSKKAEPELDLA	K	G	L	K	K	A	1	0	0	0	0	0	3	1	0	0	1	2	0	0	2	3	0	0	0	3	0	16	1	1654.8778	F1MEW3	F1MEW3	1024	1039	yes	yes	2;3	0.0066311	108.63	2	1	1	98346000	73611000	13918000	10818000
GLVSSDELAK	MSWINGIRGLVSSDEL	VSSDELAKDVTGAEAL	R	G	L	A	K	D	1	0	0	1	0	0	1	1	0	0	2	1	0	0	0	2	0	0	0	1	0	10	0	1017.5342	E1BFB0	E1BFB0	1360	1369	yes	yes	2	0.024828	85.29	1	1	1	15363000	8398400	4205300	2759200
GMIKEESVQIK	EKVSGEEKGMIKEESV	KEESVQIKETPTLSEQ	K	G	M	I	K	E	0	0	0	0	0	1	2	1	0	2	0	2	1	0	0	1	0	0	0	1	0	11	1	1260.6748	F1MEW3	F1MEW3	413	423	yes	yes	2;3	7.1164E-05	164.9	2	2	2	0	0	0	0
GNAMVEEGHFAAEDVK	RIKAVTQKGNAMVEEG	HFAAEDVKAKLHELNQ	K	G	N	V	K	A	3	0	1	1	0	0	3	2	1	0	0	1	1	1	0	0	0	0	0	2	0	16	0	1702.7621	E1BFB0	E1BFB0	847	862	yes	yes	2;3	0.0010137	111.77	2		2	0	0	0	0
GPAAIQK	IQDWYDKKGPAAIQKN	KGPAAIQKNYSPYYNT	K	G	P	Q	K	N	2	0	0	0	0	1	0	1	0	1	0	1	0	0	1	0	0	0	0	0	0	7	0	683.39662	CON__P35527	CON__P35527	193	199	yes	yes	2	0.020526	96.666		1		881510	0	881510	0
GPGLGSTQGQTIALPAQGLIEFR	RIRQTVNRGPGLGSTQ	AQGLIEFRDALAKLID	R	G	P	F	R	D	2	1	0	0	0	3	1	5	0	2	3	0	0	1	2	1	2	0	0	0	0	23	0	2310.2332	E1BMW9	E1BMW9	177	199	yes	yes	2	3.8845E-09	140.73		1		3943000	0	3943000	0
GPLIQAEDTALHLAPVSIPEAR	LSLGKEEKGPLIQAED	PVSIPEARAATASPPT	K	G	P	A	R	A	4	1	0	1	0	1	2	1	1	2	3	0	0	0	3	1	1	0	0	1	0	22	0	2297.2379	F1N3M8;G3MYP5	G3MYP5	1232	1253	no	no	2;3	1.2353E-22	220.86	2	2	1	175600000	124990000	42350000	8266900
GQAGGKLHIIEVGTPPTGNQPFPK	TLFCFAVRGQAGGKLH	TGNQPFPKKAVDVFFP	R	G	Q	P	K	K	1	0	1	0	0	2	1	5	1	2	1	2	0	1	4	0	2	0	0	1	0	24	1	2442.3019	P49951;F1MPU0	P49951	222	245	yes	no	3	0.021753	55.128	1	1	1	30670000	13423000	10065000	7182600
GQEPPTDILK	TYSKKEEKGQEPPTDI	EPPTDILKQDSFPVSL	K	G	Q	L	K	Q	0	0	0	1	0	1	1	1	0	1	1	1	0	0	2	0	1	0	0	0	0	10	0	1096.5764	F1MEW3	F1MEW3	488	497	yes	yes	2	0.024654	83.499	1	1	1	37151000	20872000	9023300	7255700
GQFSTDELVAEVEK	KNLILVVRGQFSTDEL	ELVAEVEKRNRLKLLL	R	G	Q	E	K	R	1	0	0	1	0	1	3	1	0	0	1	1	0	1	0	1	1	0	0	2	0	14	0	1550.7464	P49951;F1MPU0	P49951	838	851	yes	no	2	8.4221E-05	118.51	1	1	1	306160000	142080000	73049000	91036000
GQFSTDELVAEVEKR	KNLILVVRGQFSTDEL	LVAEVEKRNRLKLLLP	R	G	Q	K	R	N	1	1	0	1	0	1	3	1	0	0	1	1	0	1	0	1	1	0	0	2	0	15	1	1706.8475	P49951;F1MPU0	P49951	838	852	yes	no	2;3	2.5018E-21	261.17	5	3	2	5855700000	2796600000	1611900000	1447100000
GSATGLSLK	ILSSTTSKGSATGLSL	SATGLSLKKEEEEEEA	K	G	S	L	K	K	1	0	0	0	0	0	0	2	0	0	2	1	0	0	0	2	1	0	0	0	0	9	0	832.46543	Q08DH7	Q08DH7	439	447	yes	yes	2	0.052485	76.228			1	11488000	0	0	11488000
GSATGLSLKKEEEEEEASK	ILSSTTSKGSATGLSL	EEEEEASKIASKKTSQ	K	G	S	S	K	I	2	0	0	0	0	0	6	2	0	0	2	3	0	0	0	3	1	0	0	0	0	19	2	2020.9801	Q08DH7	Q08DH7	439	457	yes	yes	2;3;4	6.6051E-34	301.59	2	2	3	349290000	158590000	91315000	99379000
GSDGAASSYQLK	LKAEIEEKGSDGAASS	AASSYQLKQLEEQNAR	K	G	S	L	K	Q	2	0	0	1	0	1	0	2	0	0	1	1	0	0	0	3	0	0	1	0	0	12	0	1182.5517	F1MIC9	F1MIC9	313	324	yes	yes	2	0.00026634	117.79	1		1	4378100	2444400	0	1933700
GSGGGSSGGSIGGR	GGGSSGGRGSGGGSSG	SGGSIGGRGSSSGGVK	R	G	S	G	R	G	0	1	0	0	0	0	0	8	0	1	0	0	0	0	0	4	0	0	0	0	0	14	0	1091.4956	CON__P04264	CON__P04264	603	616	yes	yes	2	5.5013E-05	135.81		1	1	5004200	0	2784200	2220100
GSLGGGFSSGGFSGGSFSR	SLRISSSKGSLGGGFS	FSGGSFSRGSSGGGCF	K	G	S	S	R	G	0	1	0	0	0	0	0	8	0	0	1	0	0	3	0	6	0	0	0	0	0	19	0	1706.7649	CON__P13645	CON__P13645	41	59	yes	yes	2	2.0393E-05	110.56	1			27927000	27927000	0	0
GSPSTVSSSYK	FRSQSWSRGSPSTVSS	STVSSSYKRSALAPRL	R	G	S	Y	K	R	0	0	0	0	0	0	0	1	0	0	0	1	0	0	1	5	1	0	1	1	0	11	0	1098.5193	F1MDZ2;O77788	F1MDZ2	43	53	yes	no	2	0.019896	84.479	1	1	1	72849000	41944000	14603000	16301000
GSPSTVSSSYKR	FRSQSWSRGSPSTVSS	TVSSSYKRSALAPRLT	R	G	S	K	R	S	0	1	0	0	0	0	0	1	0	0	0	1	0	0	1	5	1	0	1	1	0	12	1	1254.6204	F1MDZ2;O77788	F1MDZ2	43	54	yes	no	2;3	5.4035E-06	181.49	2	2	2	88366000	47603000	23269000	17495000
GSSSGGGYSSGSSSYGSGGR	AFGGSGGRGSSSGGGY	SSYGSGGRQSGSRGGS	R	G	S	G	R	Q	0	1	0	0	0	0	0	8	0	0	0	0	0	0	0	9	0	0	2	0	0	20	0	1739.6983	CON__P35908	CON__P35908	531	550	yes	yes	2	1.5136E-05	118.37			1	3064900	0	0	3064900
GTEITHAVVIK	EKPKMFAKGTEITHAV	ITHAVVIKKLNEILQA	K	G	T	I	K	K	1	0	0	0	0	0	1	1	1	2	0	1	0	0	0	0	2	0	0	2	0	11	0	1166.6659	Q3SYW6	Q3SYW6	320	330	yes	yes	2	5.6489E-06	148.28	1	1	1	7084700	3907300	1936000	1241500
GTESPFEGKDEK	ADGKAPGRGTESPFEG	PFEGKDEKEASPDQIS	R	G	T	E	K	E	0	0	0	1	0	0	3	2	0	0	0	2	0	1	1	1	1	0	0	0	0	12	1	1322.599	F1N1S2	F1N1S2	1418	1429	yes	yes	2;3	9.3593E-05	150.51		1	2	6048600	0	2208100	3840600
GTKWEMAR	QQLENELRGTKWEMAR	GTKWEMARHLREYQDL	R	G	T	A	R	H	1	1	0	0	0	0	1	1	0	0	0	1	1	0	0	0	1	1	0	0	0	8	1	977.47529	F1MDZ2;O77788	F1MDZ2	372	379	yes	no	2	0.012234	110.22		1	1	0	0	0	0
GTLDPVEK	ELNADLFRGTLDPVEK	GTLDPVEKALRDAKLD	R	G	T	E	K	A	0	0	0	1	0	0	1	1	0	0	1	1	0	0	1	0	1	0	0	1	0	8	0	857.44945	P19120	P19120	312	319	yes	yes	2	0.05126	78.516	1			15085000	15085000	0	0
GTNESLER	TCDLESLRGTNESLER	GTNESLERQMREQEER	R	G	T	E	R	Q	0	1	1	0	0	0	2	1	0	0	1	0	0	0	0	1	1	0	0	0	0	8	0	904.42502	Q28115	Q28115	297	304	no	no	2	0.0010217	139.97	1	1	1	33011000	18142000	8527500	6341500
GTQGVVTNFEIFR	VKVDRTPKGTQGVVTN	VTNFEIFRMREKQVPV	K	G	T	F	R	M	0	1	1	0	0	1	1	2	0	1	0	0	0	2	0	0	2	0	0	2	0	13	0	1466.7518	A7MB16	A7MB16	508	520	yes	yes	2	1.2649E-06	143.25	1			4542400	4542400	0	0
GTVGEPTYDAEFQHFLR	LLARIKLKGTVGEPTY	AEFQHFLRGKEIVLSA	K	G	T	L	R	G	1	1	0	1	0	1	2	2	1	0	1	0	0	2	1	0	2	0	1	1	0	17	0	1965.9221	E1BDX8	E1BDX8	3894	3910	yes	yes	3	0.043383	35.473	1			8203300	8203300	0	0
GTYLATFHQR	TYVRWSPKGTYLATFH	YLATFHQRGIALWGGE	K	G	T	Q	R	G	1	1	0	0	0	1	0	1	1	0	1	0	0	1	0	0	2	0	1	0	0	10	0	1192.5989	A7MB16	A7MB16	318	327	yes	yes	2	2.6515E-05	185.81		1		2019300	0	2019300	0
GVIDMGNSLIDR	HANADRIRGVIDMGNS	MGNSLIDRGACAGSED	R	G	V	D	R	G	0	1	1	2	0	0	0	2	0	2	1	0	1	0	0	1	0	0	0	1	0	12	0	1288.6445	E1BFB0	E1BFB0	1608	1619	yes	yes	2	0.0097324	108.72	1		1	0	0	0	0
GVSGDRDENSFSLNSSISSAR	SSILPPRRGVSGDRDE	NSSISSARRTTRSEPI	R	G	V	A	R	R	1	2	2	2	0	0	1	2	0	1	1	0	0	1	0	7	0	0	0	1	0	21	1	2184.0043	F1MEW3	F1MEW3	1562	1582	yes	yes	2;3	7.3311E-19	221.14	2	2	2	85381000	39105000	25513000	20763000
GVVTNGLDVSPGDEK	GSGGEEEKGVVTNGLD	DVSPGDEKKGGDKSEE	K	G	V	E	K	K	0	0	1	2	0	0	1	3	0	0	1	1	0	0	1	1	1	0	0	3	0	15	0	1485.7311	F1MDZ2;O77788	F1MDZ2	838	852	yes	no	2	0.007275	103.79	1			0	0	0	0
GYSFTTTAER	LMKILTERGYSFTTTA	SFTTTAEREIVRDIKE	R	G	Y	E	R	E	1	1	0	0	0	0	1	1	0	0	0	0	0	1	0	1	3	0	1	0	0	10	0	1131.5197	P63258;P60712;F1MRD0	P63258	197	206	yes	no	2	8.1067E-05	166.19	1	1	1	58432000	25278000	17689000	15465000
HAALVSELETTK	SKPGEDLKHAALVSEL	VSELETTKTSPDKKDI	K	H	A	T	K	T	2	0	0	0	0	0	2	0	1	0	2	1	0	0	0	1	2	0	0	1	0	12	0	1297.6878	F1MEW3	F1MEW3	194	205	yes	yes	2	3.5186E-19	276.95	1	1	1	301840000	164230000	75785000	61830000
HALDANQGTATGPR	AARNILEKHALDANQG	QGTATGPRGIFTKEDA	K	H	A	P	R	G	3	1	1	1	0	1	0	2	1	0	1	0	0	0	1	0	2	0	0	0	0	14	0	1407.6855	P22439	P22439	195	208	yes	yes	2	1.4362E-07	141.85	1	1		7318800	5153300	2165600	0
HDEYLEVTK	PGPPARARHDEYLEVT	DEYLEVTKAPSLDSSL	R	H	D	T	K	A	0	0	0	1	0	0	2	0	1	0	1	1	0	0	0	0	1	0	1	1	0	9	0	1132.5401	G3MYP5	G3MYP5	2222	2230	yes	yes	2	3.5238E-05	195.58	1			19740000	19740000	0	0
HDVVFLITK	VAMQISEKHDVVFLIT	DVVFLITKYGYIHLYD	K	H	D	T	K	Y	0	0	0	1	0	0	0	0	1	1	1	1	0	1	0	0	1	0	0	2	0	9	0	1070.6124	P49951;F1MPU0	P49951	270	278	yes	no	2	0.00018142	159.11	2	1	1	2198900000	1138800000	613880000	446260000
HEIVAAAASFAPALLQPDDQK	TLPFDISKHEIVAAAA	LLQPDDQKSLEETGSP	K	H	E	Q	K	S	6	0	0	2	0	2	1	0	1	1	2	1	0	1	2	1	0	0	0	1	0	21	0	2191.1273	F1MEW3	F1MEW3	331	351	yes	yes	2	1.911E-18	198.24			1	6988500	0	0	6988500
HELIEFR	SLAQRLEKHELIEFRR	KHELIEFRRIAAYLFK	K	H	E	F	R	R	0	1	0	0	0	0	2	0	1	1	1	0	0	1	0	0	0	0	0	0	0	7	0	942.49232	P49951;F1MPU0	P49951	1502	1508	yes	no	1;2	2.0374E-06	225.8	2	2	2	1352800000	762430000	378280000	212070000
HELIEFRR	SLAQRLEKHELIEFRR	HELIEFRRIAAYLFKG	K	H	E	R	R	I	0	2	0	0	0	0	2	0	1	1	1	0	0	1	0	0	0	0	0	0	0	8	1	1098.5934	P49951;F1MPU0	P49951	1502	1509	yes	no	3	0.00021455	163.04		1	1	3845800	0	1903700	1942100
HGGGGGGFGGGGFGSR	SSFSCLSRHGGGGGGF	GGGGFGSRSLVGLGGT	R	H	G	S	R	S	0	1	0	0	0	0	0	11	1	0	0	0	0	2	0	1	0	0	0	0	0	16	0	1319.5755	CON__P35908	CON__P35908	46	61	yes	yes	2	7.6442E-13	189.07	1	1		12346000	7198500	5147300	0
HGNSHQGEPR	KIKEWYEKHGNSHQGE	NSHQGEPRDYSKYYKT	K	H	G	P	R	D	0	1	1	0	0	1	1	2	2	0	0	0	0	0	1	1	0	0	0	0	0	10	0	1117.5013	CON__P13645	CON__P13645	185	194	yes	yes	2;3	3.3641E-06	149.96	3	2	2	791830	413100	178710	200020
HGVQELEIELQSQLSK	AKEVTQLRHGVQELEI	ELQSQLSKKAALEKSL	R	H	G	S	K	K	0	0	0	0	0	3	3	1	1	1	3	1	0	0	0	2	0	0	0	1	0	16	0	1836.9581	CON__P35527	CON__P35527	375	390	yes	yes	2;3	9.6015E-23	245.04	1	2	2	37930000	15962000	14715000	7252500
HLDFLK	LEGLEKLKHLDFLKQP	LKHLDFLKQPLATQKD	K	H	L	L	K	Q	0	0	0	1	0	0	0	0	1	0	2	1	0	1	0	0	0	0	0	0	0	6	0	771.42792	F1N1S2;F1MF27	F1N1S2	507	512	yes	no	2	0.01172	118.06	1	1	1	30728000	16706000	8167300	5854400
HLDFLKQPLATQK	LEGLEKLKHLDFLKQP	KQPLATQKDLTGQVAT	K	H	L	Q	K	D	1	0	0	1	0	2	0	0	1	0	3	2	0	1	1	0	1	0	0	0	0	13	1	1537.8617	F1N1S2	F1N1S2	507	519	yes	yes	3	0.00079149	102.87		1	1	8649900	0	4922000	3727900
HLDFLR	LEGLEKLRHLDFLRYP	LRHLDFLRYPVATQKD	R	H	L	L	R	Y	0	1	0	1	0	0	0	0	1	0	2	0	0	1	0	0	0	0	0	0	0	6	0	799.43407	F1N3M8;G3MYP5	G3MYP5	285	290	no	no	2	0.0022193	175.34	1	1	1	61630000	31104000	21529000	8996900
HLDRIDSVLLTHIGADNLPGINGLLQR	SCFWKLVRHLDRIDSV	GINGLLQRKVAELEEE	R	H	L	Q	R	K	1	2	2	3	0	1	0	3	2	3	6	0	0	0	1	1	1	0	0	1	0	27	1	2949.6148	F1N3M8;G3MYP5	G3MYP5	78	104	no	no	3;4	8.5921E-05	128.98	2	1	1	7028300	7028300	0	0
HLDRVDSILLTHIGDDNLPGINSMLQR	SCFWKLIRHLDRVDSI	GINSMLQRKIAELEEE	R	H	L	Q	R	K	0	2	2	4	0	1	0	2	2	3	5	0	1	0	1	2	1	0	0	1	0	27	1	3041.5717	F1N1S2	F1N1S2	300	326	yes	yes	3	0.0001894	109.23	1	1	1	0	0	0	0
HLLGVEDLLQK	LLSQDYGKHLLGVEDL	GVEDLLQKHALVEADI	K	H	L	Q	K	H	0	0	0	1	0	1	1	1	1	0	4	1	0	0	0	0	0	0	0	1	0	11	0	1263.7187	F1MYC9	F1MYC9	559	569	yes	yes	2	5.2925E-09	202.03	1	1	1	15853000	7514000	3299000	5039700
HLLPVETQR	FTGSADIKHLLPVETQ	LLPVETQRFQSISTEF	K	H	L	Q	R	F	0	1	0	0	0	1	1	0	1	0	2	0	0	0	1	0	1	0	0	1	0	9	0	1091.6087	E1BDX8	E1BDX8	1558	1566	yes	yes	2	0.00049592	125.16	1			4457100	4457100	0	0
HLQEALK	KAEGFYQKHLQEALKV	KHLQEALKVTPGGKEA	K	H	L	L	K	V	1	0	0	0	0	1	1	0	1	0	2	1	0	0	0	0	0	0	0	0	0	7	0	837.47085	F1N3M8;G3MYP5	G3MYP5	676	682	no	no	2	0.0051974	134.08	1	1	1	70278000	38414000	19099000	12765000
HLQEYQDLLNVK	SLKDEMARHLQEYQDL	YQDLLNVKLALDIEIA	R	H	L	V	K	L	0	0	1	1	0	2	1	0	1	0	3	1	0	0	0	0	0	0	1	1	0	12	0	1498.778	Q28115	Q28115	341	352	yes	yes	2;3	1.8426E-10	219.89	2	2	2	411950000	276000000	73931000	62021000
HMDPPPAPMQDR	TDKTVTYKHMDPPPAP	PPAPMQDRSPSPRHPD	K	H	M	D	R	S	1	1	0	2	0	1	0	0	1	0	0	0	2	0	4	0	0	0	0	0	0	12	0	1390.6122	F1N1S2	F1N1S2	2192	2203	yes	yes	2	0.0055322	80.871	1	1	1	0	0	0	0
HNHDLSSYQDTIQQLENELR	QLSDIEERHNHDLSSY	QQLENELRGTKWEMAR	R	H	N	L	R	G	0	1	2	2	0	3	2	0	2	1	3	0	0	0	0	2	1	0	1	0	0	20	0	2439.1415	F1MDZ2;O77788	F1MDZ2	352	371	yes	no	2;3;4	5.1831E-18	190.83	3	3	3	413680000	219320000	100590000	93766000
HNIMDFAMPYFIQVMK	VVLETAWRHNIMDFAM	PYFIQVMKEYLTKVDK	R	H	N	M	K	E	1	0	1	1	0	1	0	0	1	2	0	1	3	2	1	0	0	0	1	1	0	16	0	1983.9409	P49951;F1MPU0	P49951	1589	1604	yes	no	2;3	1.8767E-05	112.24	4	4	4	0	0	0	0
HQADIASYQEAIQQLDAELR	QRSELEDRHQADIASY	QQLDAELRNTKWEMAA	R	H	Q	L	R	N	4	1	0	2	0	4	2	0	1	2	2	0	0	0	0	1	0	0	1	0	0	20	0	2298.124	F1MSQ6	F1MSQ6	347	366	yes	yes	2;3	1.2188E-54	327.31	2	2	2	256080000	92102000	94893000	69089000
HQAFEAELSANQSR	NLQGKVQKHQAFEAEL	ELSANQSRIDALEKAG	K	H	Q	S	R	I	3	1	1	0	0	2	2	0	1	0	1	0	0	1	0	2	0	0	0	0	0	14	0	1586.7437	E1BFB0	E1BFB0	614	627	yes	yes	2	6.007E-08	153.94		1		4182300	0	4182300	0
HQAFEAEVQANSGAIVK	NLQGKLQKHQAFEAEV	ANSGAIVKLDETGNLM	K	H	Q	V	K	L	4	0	1	0	0	2	2	1	1	1	0	1	0	1	0	1	0	0	0	2	0	17	0	1797.901	E1BFB0	E1BFB0	85	101	yes	yes	2	1.2775E-13	206.7	1	1	1	21246000	11602000	6386800	3257500
HQGVMVGMGQK	PSIVGRPRHQGVMVGM	VMVGMGQKDSYVGDEA	R	H	Q	Q	K	D	0	0	0	0	0	2	0	3	1	0	0	1	2	0	0	0	0	0	0	2	0	11	0	1170.5638	P63258;P60712;F1MRD0	P63258	40	50	no	no	2	0.0067913	96.171	1	1	1	0	0	0	0
HQILEQAVEDYAETVHQLSK	SAVSMLKKHQILEQAV	ETVHQLSKTSRALVAD	K	H	Q	S	K	T	2	0	0	1	0	3	3	0	2	1	2	1	0	0	0	1	1	0	1	2	0	20	0	2337.1601	F1MYC9	F1MYC9	1633	1652	yes	yes	3	7.4874E-06	100.28	1	1	1	17034000	8693800	4312400	4027300
HSAEVASYQDNIGQLENDLR	QILELEERHSAEVASY	GQLENDLRNTKSEMAR	R	H	S	L	R	N	2	1	2	2	0	2	2	1	1	1	2	0	0	0	0	2	0	0	1	1	0	20	0	2258.0564	Q08DH7	Q08DH7	347	366	yes	yes	2;3	7.7867E-44	293.01	2	2	2	410020000	170600000	128420000	111010000
HSLAEEEESAKAEADAHVK	HVRVSTSKHSLAEEEE	AEADAHVKEKRESVAS	K	H	S	V	K	E	5	0	0	1	0	0	5	0	2	0	1	2	0	0	0	2	0	0	0	1	0	19	1	2049.9603	F1N1S2	F1N1S2	966	984	yes	yes	3;4	3.8044E-18	207.56	2	2	2	104360000	60007000	27017000	17339000
HSPGVITSLGEHILTPDSSLTK	TALLGEGRHSPGVITS	TPDSSLTKSPESLPSP	R	H	S	T	K	S	0	0	0	1	0	0	1	2	2	2	3	1	0	0	2	4	3	0	0	1	0	22	0	2288.2012	G3MYP5	G3MYP5	1298	1319	yes	yes	3	2.0142E-06	106.86		1		40934000	0	40934000	0
HSQGINWYHWK	NGKYGESRHSQGINWY	GINWYHWKGHEFSIPF	R	H	S	W	K	G	0	0	1	0	0	1	0	1	2	1	0	1	0	0	0	1	0	2	1	0	0	11	0	1454.6844	E1BKN2	E1BKN2	1317	1327	yes	yes	3	0.0008313	105.46			1	3496300	0	0	3496300
HSSLAGCQIINYR	QPVKMFDRHSSLAGCQ	GCQIINYRTDAKQKWL	R	H	S	Y	R	T	1	1	1	0	1	1	0	1	1	2	1	0	0	0	0	2	0	0	1	0	0	13	0	1460.7194	P49951;F1MPU0	P49951	145	157	yes	no	2	8.277E-19	243.4		1	1	9892300	0	4877900	5014400
HWPFMVVNDAGRPK	AVVQSDMKHWPFMVVN	VNDAGRPKVQVEYKGE	K	H	W	P	K	V	1	1	1	1	0	0	0	1	1	0	0	1	1	1	2	0	0	1	0	2	0	14	1	1652.8246	P19120	P19120	89	102	yes	yes	3	0.00056523	117.95	1	1	1	0	0	0	0
IAALQSFADQLIAGGHYAK	AINVQEEKIAALQSFA	IAGGHYAKGDISSRRN	K	I	A	A	K	G	5	0	0	1	0	2	0	2	1	2	2	1	0	1	0	1	0	0	1	0	0	19	0	1973.0371	E1BFB0	E1BFB0	1501	1519	yes	yes	2;3	6.1916E-05	97.095	1	2	2	89953000	43856000	27136000	18961000
IAAYLFK	HELIEFRRIAAYLFKG	RIAAYLFKGNNRWKQS	R	I	A	F	K	G	2	0	0	0	0	0	0	0	0	1	1	1	0	1	0	0	0	0	1	0	0	7	0	824.47963	P49951;F1MPU0	P49951	1510	1516	yes	no	2	0.029443	88.734	1	1	1	1536400000	725770000	346140000	464480000
IAEAPASEAVAAPK	PQKDQPDKIAEAPASE	SEAVAAPKDAHVSIVE	K	I	A	P	K	D	6	0	0	0	0	0	2	0	0	1	0	1	0	0	2	1	0	0	0	1	0	14	0	1323.7034	F1MEW3	F1MEW3	379	392	yes	yes	2	0.00033073	112.42	1	1	1	125860000	70694000	34295000	20872000
IAFIMDESNVLDSGFLER	RSGCKNEKIAFIMDES	LDSGFLERMNTLLANG	K	I	A	E	R	M	1	1	1	2	0	0	2	1	0	2	2	0	1	2	0	2	0	0	0	1	0	18	0	2054.9983	E1BDX8	E1BDX8	2990	3007	yes	yes	2	1.2292E-07	143.28		1	1	0	0	0	0
IATQELFEEK	EPTALSEKIATQELFE	TQELFEEKVADKDHKV	K	I	A	E	K	V	1	0	0	0	0	1	3	0	0	1	1	1	0	1	0	0	1	0	0	0	0	10	0	1206.6132	F1MEW3	F1MEW3	533	542	yes	yes	2	0.0041354	106.62	1			100740000	100740000	0	0
IDLSHVTSK	QVQIVTKKIDLSHVTS	DLSHVTSKCGSLKNIR	K	I	D	S	K	C	0	0	0	1	0	0	0	0	1	1	1	1	0	0	0	2	1	0	0	1	0	9	0	998.53966	F1MEW3	F1MEW3	1707	1715	yes	yes	2;3	0.00041636	154.81	2			16952000	16952000	0	0
IDSLMDEIAFLK	ARAELEKRIDSLMDEI	MDEIAFLKKVHEEEIA	R	I	D	L	K	K	1	0	0	2	0	0	1	0	0	2	2	1	1	1	0	1	0	0	0	0	0	12	0	1393.7163	P02548	P02548	213	224	yes	yes	2	0.0071121	110.31	1	1	1	0	0	0	0
IDSLMDEIAFLKK	ARAELEKRIDSLMDEI	DEIAFLKKVHEEEIAE	R	I	D	K	K	V	1	0	0	2	0	0	1	0	0	2	2	2	1	1	0	1	0	0	0	0	0	13	1	1521.8113	P02548	P02548	213	225	yes	yes	3	2.8662E-05	142.83	1	1	1	0	0	0	0
IDSVLLTHIGADNLPGINGLLQR	KLVRHLDRIDSVLLTH	GINGLLQRKVAELEEE	R	I	D	Q	R	K	1	1	2	2	0	1	0	3	1	3	5	0	0	0	1	1	1	0	0	1	0	23	0	2428.3438	F1N3M8;G3MYP5	G3MYP5	82	104	no	no	2	0.010237	93.776		1		0	0	0	0
IEISELNR	GDSVRNSKIEISELNR	IEISELNRVIQRLRSE	K	I	E	N	R	V	0	1	1	0	0	0	2	0	0	2	1	0	0	0	0	1	0	0	0	0	0	8	0	972.52401	CON__P04264;CON__P35908	CON__P04264	396	403	no	no	2	0.00014791	193.28	1	1	1	52563000	27462000	13677000	11424000
IFTIESTR	RNLGVSGRIFTIESTR	IFTIESTRVRGRAGSV	R	I	F	T	R	V	0	1	0	0	0	0	1	0	0	2	0	0	0	1	0	1	2	0	0	0	0	8	0	965.5182	E1BDX8	E1BDX8	716	723	yes	yes	2	0.0097078	96.027		1		2359800	0	2359800	0
IGFGPSPFLLPEGLPK	LLEGEECRIGFGPSPF	LLPEGLPKIPSVSTHI	R	I	G	P	K	I	0	0	0	0	0	0	1	3	0	1	3	1	0	2	4	1	0	0	0	0	0	16	0	1667.9287	F1MSQ6	F1MSQ6	407	422	yes	yes	2	8.3969E-05	106.82	1	1	1	194710000	107880000	39041000	47791000
IGSTDNIK	DLKNVKSKIGSTDNIK	IGSTDNIKYQPKGGQV	K	I	G	I	K	Y	0	0	1	1	0	0	0	1	0	2	0	1	0	0	0	1	1	0	0	0	0	8	0	846.4447	F1MEW3	F1MEW3	1685	1692	yes	yes	2	0.0017231	123.98	1	1	1	40524000	22237000	10043000	8243600
IHEGCEEPATHNALAK	LLPWLEARIHEGCEEP	ATHNALAKIYIDSNNN	R	I	H	A	K	I	3	0	1	0	1	0	3	1	2	1	1	1	0	0	1	0	1	0	0	0	0	16	0	1718.8046	P49951;F1MPU0	P49951	866	881	yes	no	3	2.051E-05	115.63	1	1	1	161550000	99523000	31096000	30931000
IIAPPER	APSTMKIKIIAPPERK	KIIAPPERKYSVWIGG	K	I	I	E	R	K	1	1	0	0	0	0	1	0	0	2	0	0	0	0	2	0	0	0	0	0	0	7	0	794.46504	P63258;P60712;F1MRD0	P63258	329	335	no	no	2	0.0085838	107.32		1	1	8152700	0	4697200	3455500
IIAPPERK	APSTMKIKIIAPPERK	IIAPPERKYSVWIGGS	K	I	I	R	K	Y	1	1	0	0	0	0	1	0	0	2	0	1	0	0	2	0	0	0	0	0	0	8	1	922.56	P63258;P60712;F1MRD0	P63258	329	336	no	no	3	0.0055808	101.41	1	1	1	11330000	7323300	2078400	1928200
IINEPTAAAIAYGLDKK	IAGLNVLRIINEPTAA	IAYGLDKKVGAERNVL	R	I	I	K	K	V	4	0	1	1	0	0	1	1	0	3	1	2	0	0	1	0	1	0	1	0	0	17	1	1786.9829	P19120	P19120	172	188	no	no	2;3	0.0002313	122.01	2	2	1	94692000	52433000	24431000	17828000
IINEPTAAAIAYGLDR	IAGLNVLRIINEPTAA	AIAYGLDRTGKGERNV	R	I	I	D	R	T	4	1	1	1	0	0	1	1	0	3	1	0	0	0	1	0	1	0	1	0	0	16	0	1686.8941	Q27975;Q27965	Q27975	172	187	no	no	2	1.635E-06	123.02	1	1	1	18948000	9167000	5627900	4152600
IKEWYEK	SNYELEGKIKEWYEKH	KIKEWYEKHGNSHQGE	K	I	K	E	K	H	0	0	0	0	0	0	2	0	0	1	0	2	0	0	0	0	0	1	1	0	0	7	1	994.51238	CON__P13645;P06394;A6QNZ7;CON__P02535-1;F1MFW9	CON__P13645	178	184	yes	no	2;3	0.0040344	118.32	2	2	2	82679000	46276000	23202000	13202000
IKFEMEQNLR	RMTLDDFRIKFEMEQN	FEMEQNLRQGVDADIN	R	I	K	L	R	Q	0	1	1	0	0	1	2	0	0	1	1	1	1	1	0	0	0	0	0	0	0	10	1	1306.6704	CON__P35527	CON__P35527	241	250	yes	yes	2;3	0.0011135	135.56	2	2	2	0	0	0	0
IKGEELSEANVR	KELKKSLKIKGEELSE	ELSEANVRLSLLEKKL	K	I	K	V	R	L	1	1	1	0	0	0	3	1	0	1	1	1	0	0	0	1	0	0	0	1	0	12	1	1343.7045	F1MIC9	F1MIC9	924	935	yes	yes	2	0.00010784	142.12	1		1	9821700	6550500	0	3271200
ILADLEDYLNELWEDKEGK	GVPRFYIRILADLEDY	LWEDKEGKKKMNKNNA	R	I	L	G	K	K	1	0	1	3	0	0	4	1	0	1	4	2	0	0	0	0	0	1	1	0	0	19	1	2292.1162	Q3SYW6	Q3SYW6	109	127	yes	yes	3	2.659E-09	173.37	1	1		3022100	2021000	1001100	0
ILDDDTIITTLENLKR	ALNEVKGRILDDDTII	TTLENLKREAAEVTRK	R	I	L	K	R	E	0	1	1	3	0	0	1	0	0	3	3	1	0	0	0	0	3	0	0	0	0	16	1	1872.0204	E1BDX8	E1BDX8	3760	3775	yes	yes	3	1.6741E-05	126.25	1	1	1	25681000	14112000	6473900	5095300
ILEDNSVPQVK	DVPMPYAKILEDNSVP	DNSVPQVKDIIFAIKK	K	I	L	V	K	D	0	0	1	1	0	1	1	0	0	1	1	1	0	0	1	1	0	0	0	2	0	11	0	1240.6663	P11966	P11966	337	347	yes	yes	2	0.0092441	87.184		1		4238300	0	4238300	0
ILEGLEK	PGNAPQNKILEGLEKL	KILEGLEKLRHLDFLR	K	I	L	E	K	L	0	0	0	0	0	0	2	1	0	1	2	1	0	0	0	0	0	0	0	0	0	7	0	800.46437	F1N3M8;G3MYP5	G3MYP5	276	282	no	no	2	0.033343	87.323	1	1	1	49197000	25222000	17173000	6801700
ILIPEGTR	QEEGYLAKILIPEGTR	ILIPEGTRDVPLGTPL	K	I	L	T	R	D	0	1	0	0	0	0	1	1	0	2	1	0	0	0	1	0	1	0	0	0	0	8	0	897.52837	F1N690	F1N690	275	282	yes	yes	2	0.0010804	131.03	1	1	1	14589000	8499200	3707400	2382000
ILSSTTSK	PSYLLPPRILSSTTSK	ILSSTTSKGSATGLSL	R	I	L	S	K	G	0	0	0	0	0	0	0	0	0	1	1	1	0	0	0	3	2	0	0	0	0	8	0	835.4651	Q08DH7	Q08DH7	431	438	yes	yes	2	0.0086371	102.51	1	1	1	72355000	44838000	15729000	11788000
IMEGPAFNFLDAPAVR	VGAEICARIMEGPAFN	FLDAPAVRVTGADVPM	R	I	M	V	R	V	3	1	1	1	0	0	1	1	0	1	1	0	1	2	2	0	0	0	0	1	0	16	0	1746.8763	P11966	P11966	309	324	yes	yes	2	0.00010987	136.81	1	1		0	0	0	0
IMNTFSVVPSPK	IREEYPDRIMNTFSVV	FSVVPSPKVSDTVVEP	R	I	M	P	K	V	0	0	1	0	0	0	0	0	0	1	0	1	1	1	2	2	1	0	0	2	0	12	0	1318.6955	Q2KJD0;E1B953;Q3MHM5;Q2T9S0;Q3ZBU7	Q3MHM5	163	174	no	no	2	0.0073389	113.24		1	1	0	0	0	0
INAVVETGR	TMDANEEKINAVVETG	NAVVETGRRLVSDGNI	K	I	N	G	R	R	1	1	1	0	0	0	1	1	0	1	0	0	0	0	0	0	1	0	0	2	0	9	0	957.52434	F1MYC9	F1MYC9	1225	1233	yes	yes	2	0.037366	83.358		1	1	1353800	0	672190	681600
INEWLTLVEK	VSITEHPKINEWLTLV	EWLTLVEKEMRVTLAK	K	I	N	E	K	E	0	0	1	0	0	0	2	0	0	1	2	1	0	0	0	0	1	1	0	1	0	10	0	1243.6812	E1BDX8	E1BDX8	1698	1707	yes	yes	2	0.0086816	84.309	1			3246300	3246300	0	0
INVYYNEAAGNK	DSDLQLERINVYYNEA	YNEAAGNKYVPRAILV	R	I	N	N	K	Y	2	0	3	0	0	0	1	1	0	1	0	1	0	0	0	0	0	0	2	1	0	12	0	1354.6517	E1BJB1;G3X7R7	E1BJB1	47	58	yes	no	2	0.00015845	121.61	1	1	1	57489000	33455000	15395000	8639600
INVYYNEATGGK	DSDLQLERINVYYNEA	YNEATGGKYVPRAVLV	R	I	N	G	K	Y	1	0	2	0	0	0	1	2	0	1	0	1	0	0	0	0	1	0	2	1	0	12	0	1327.6408	Q3MHM5	Q3MHM5	47	58	yes	yes	2	3.5172E-05	138.45	1	1	1	15243000	8127400	3800900	3314400
INVYYNEATGGNYVPR	DSDLQLERINVYYNEA	TGGNYVPRAVLVDLEP	R	I	N	P	R	A	1	1	3	0	0	0	1	2	0	1	0	0	0	0	1	0	1	0	3	2	0	16	0	1828.8744	Q3ZBU7	Q3ZBU7	47	62	yes	yes	2	5.9979E-09	156.17	1		1	30244000	23238000	0	7006300
IPSVSTHIK	LLPEGLPKIPSVSTHI	PSVSTHIKVKSEEKIK	K	I	P	I	K	V	0	0	0	0	0	0	0	0	1	2	0	1	0	0	1	2	1	0	0	1	0	9	0	980.56548	F1MSQ6	F1MSQ6	423	431	yes	yes	2	0.013822	90.696	1	1	1	81858000	41703000	19900000	20254000
IQDWYDKK	ANNDLENKIQDWYDKK	IQDWYDKKGPAAIQKN	K	I	Q	K	K	G	0	0	0	2	0	1	0	0	0	1	0	2	0	0	0	0	0	1	1	0	0	8	1	1094.5397	CON__P35527	CON__P35527	185	192	yes	yes	2;3	0.0057744	133.33	2	2	2	34189000	21970000	7389600	4830200
IQGLTGEQAEAVVR	LSAGSTPKIQGLTGEQ	EQAEAVVRLSCLPAFK	K	I	Q	V	R	L	2	1	0	0	0	2	2	2	0	1	1	0	0	0	0	0	1	0	0	2	0	14	0	1469.7838	E1BDX8	E1BDX8	3924	3937	yes	yes	2	1.7551E-10	184.98	1	1	1	18979000	9230600	6001800	3746200
IREEYPDR	MGTLLISKIREEYPDR	IREEYPDRIMNTFSVV	K	I	R	D	R	I	0	2	0	1	0	0	2	0	0	1	0	0	0	0	1	0	0	0	1	0	0	8	1	1076.5251	Q2KJD0;Q3MHM5;G3X7R8;Q2HJ81;E1BJB1;Q6B856;G3X7R7;G3N1W7;E1BJK2;CON__ENSEMBL:ENSBTAP00000025008	Q3MHM5	155	162	no	no	2;3	0.000241	153.05	2	2	2	36665000	21840000	8395000	6429800
IRLENEIQTYR	YQQLLDIKIRLENEIQ	ENEIQTYRSLLEGEGS	K	I	R	Y	R	S	0	2	1	0	0	1	2	0	0	2	1	0	0	0	0	0	1	0	1	0	0	11	1	1433.7627	CON__P13645;P06394;A6QNZ7	CON__P13645	440	450	yes	no	2;3	3.1916E-44	266.69	2	2	2	48316000	12589000	18811000	16916000
ISDFGQMASGLHVDAGEAAELK	EQGQLDIKISDFGQMA	AGEAAELKLEATQDLA	K	I	S	L	K	L	4	0	0	2	0	1	2	3	1	1	2	1	1	1	0	2	0	0	0	1	0	22	0	2245.0685	F1MEW3	F1MEW3	1060	1081	yes	yes	2;3	4.926E-05	96.016	1	2	2	0	0	0	0
ISEQFTAMFR	AIQELFKRISEQFTAM	EQFTAMFRRKAFLHWY	R	I	S	F	R	R	1	1	0	0	0	1	1	0	0	1	0	0	1	2	0	1	1	0	0	0	0	10	0	1228.591	Q2KJD0;Q3MHM5;E1BJB1;Q6B856;Q2T9S0;Q3ZBU7	Q3MHM5	381	390	no	no	2	0.00030753	147.78	1	1	1	0	0	0	0
ISGETIFVTAPHEATAGIIGVNR	GTCIYMNRISGETIFV	AGIIGVNRKGQVLSVC	R	I	S	N	R	K	3	1	1	0	0	0	2	3	1	4	0	0	0	1	1	1	3	0	0	2	0	23	0	2352.2438	P49951;F1MPU0	P49951	298	320	yes	no	2;3	2.2579E-20	177.08	5	2	3	6927600000	3656200000	1635600000	1635800000
ISGETIFVTAPHEATAGIIGVNRK	GTCIYMNRISGETIFV	GIIGVNRKGQVLSVCV	R	I	S	R	K	G	3	1	1	0	0	0	2	3	1	4	0	1	0	1	1	1	3	0	0	2	0	24	1	2480.3387	P49951;F1MPU0	P49951	298	321	yes	no	2;3;4	4.316E-05	115.54	4	3	3	3133000000	1723200000	809140000	600680000
ISGSPSSGFR	ETRSSFSRISGSPSSG	GSPSSGFRSQSWSRGS	R	I	S	F	R	S	0	1	0	0	0	0	0	2	0	1	0	0	0	1	1	4	0	0	0	0	0	10	0	993.48796	F1MDZ2;O77788	F1MDZ2	27	36	yes	no	2	9.6416E-10	189.18		1	1	28998000	0	28998000	0
ISKLEEK	GKKHLKEKISKLEEKK	KISKLEEKKDKEKKEI	K	I	S	E	K	K	0	0	0	0	0	0	2	0	0	1	1	2	0	0	0	1	0	0	0	0	0	7	1	845.48583	F1N3M8;G3MYP5	G3MYP5	409	415	no	no	2	0.0028379	144.12	1			5078400	5078400	0	0
ISKPDLKPFTPEVR	DTKPEVKKISKPDLKP	KPFTPEVRKTLYKAKA	K	I	S	V	R	K	0	1	0	1	0	0	1	0	0	1	1	2	0	1	3	1	1	0	0	1	0	14	2	1625.9141	F1N3M8;G3MYP5	G3MYP5	459	472	no	no	3;4	0.003619	102.12	2	2	2	66060000	36394000	17888000	11778000
ISVNDFIIK	KMLEGKSKISVNDFII	SVNDFIIKASALACLK	K	I	S	I	K	A	0	0	1	1	0	0	0	0	0	3	0	1	0	1	0	1	0	0	0	1	0	9	0	1047.5964	F1N690	F1N690	474	482	yes	yes	2	0.0044287	109.66	1	1	1	12357000	6603100	2764500	2989200
ISVYYNEASSHK	DSDLQLERISVYYNEA	YNEASSHKYVPRAILV	R	I	S	H	K	Y	1	0	1	0	0	0	1	0	1	1	0	1	0	0	0	3	0	0	2	1	0	12	0	1396.6623	Q2T9S0	Q2T9S0	47	58	yes	yes	3	0.0037269	82.505			1	2823700	0	0	2823700
ISVYYNEATGGK	DSDLQLDRISVYYNEA	YNEATGGKYVPRAILV	R	I	S	G	K	Y	1	0	1	0	0	0	1	2	0	1	0	1	0	0	0	1	1	0	2	1	0	12	0	1300.6299	Q2KJD0;E1B953	Q2KJD0	47	58	yes	no	2	4.7687E-06	142.47	1	1	1	10951000	5785100	3322900	1842600
ITALDEFATK	SLSAQEEKITALDEFA	ALDEFATKLIQNNHYA	K	I	T	T	K	L	2	0	0	1	0	0	1	0	0	1	1	1	0	1	0	0	2	0	0	0	0	10	0	1107.5812	E1BFB0	E1BFB0	523	532	yes	yes	2	0.00039312	121.9	1	1		13138000	8177000	4960900	0
ITFTPSSGIASEVTVPK	SGPIDHYRITFTPSSG	ASEVTVPKDRTSYTLT	R	I	T	P	K	D	1	0	0	0	0	0	1	1	0	2	0	1	0	1	2	3	3	0	0	2	0	17	0	1732.9247	E1BKN2	E1BKN2	718	734	yes	yes	2	0.00028974	100.04	1	1	1	170810000	99449000	36970000	34390000
ITIPVQTFSNLQIR	LLEGEENRITIPVQTF	TFSNLQIRETSLDTKS	R	I	T	I	R	E	0	1	1	0	0	2	0	0	0	3	1	0	0	1	1	1	2	0	0	1	0	14	0	1628.925	Q28115	Q28115	373	386	yes	yes	2	3.8321E-10	170.66	1	1	1	245070000	114570000	51772000	78728000
ITITNDK	KSTGKENKITITNDKG	KITITNDKGRLSKEDI	K	I	T	D	K	G	0	0	1	1	0	0	0	0	0	2	0	1	0	0	0	0	2	0	0	0	0	7	0	803.43888	Q27975;Q27965;P0CB32;P19120	P19120	501	507	no	no	2	0.004044	145.04	1	1	1	13782000	7875000	3100400	2806600
IVLDNSVFSEHR	ELIELLEKIVLDNSVF	NSVFSEHRNLQNLLIL	K	I	V	H	R	N	0	1	1	1	0	0	1	0	1	1	1	0	0	1	0	2	0	0	0	2	0	12	0	1414.7205	P49951;F1MPU0	P49951	1011	1022	yes	no	2;3	2.8301E-13	257.42	5	7	6	4881700000	2362200000	1538400000	981010000
IVQVVTAEAVAVLKGEQEK	TAEEVSARIVQVVTAE	VLKGEQEKEAQPKDQP	R	I	V	E	K	E	3	0	0	0	0	2	3	1	0	1	1	2	0	0	0	0	1	0	0	5	0	19	1	2010.1361	F1MEW3	F1MEW3	94	112	yes	yes	2;3	1.1451E-09	173.98	2	2	2	138770000	67223000	38065000	33481000
IVSSNDVGHDEYSTQSLVK	AWMLDILKIVSSNDVG	YSTQSLVKKHKDVAEE	K	I	V	V	K	K	0	0	1	2	0	1	1	1	1	1	1	1	0	0	0	4	1	0	1	3	0	19	0	2076.9964	F1MYC9	F1MYC9	766	784	yes	yes	2	4.4854E-08	119.62	1			5379800	5379800	0	0
IWHHTFYNELR	TNWDDMEKIWHHTFYN	HTFYNELRVAPEEHPV	K	I	W	L	R	V	0	1	1	0	0	0	1	0	2	1	1	0	0	1	0	0	1	1	1	0	0	11	0	1514.7419	P63258;P60712;F1MRD0	P63258	85	95	no	no	2;3	2.8071E-07	162.38	2	2	1	59429000	32212000	16486000	10732000
IWNVHSVLNVLHSLVDK	DFLRSNPKIWNVHSVL	VLHSLVDKSNINRQLE	K	I	W	D	K	S	0	0	2	1	0	0	0	0	2	1	3	1	0	0	0	2	0	1	0	4	0	17	0	1972.0894	Q3ZCK1	Q3ZCK1	221	237	yes	yes	3	2.9205E-08	123.63	1			1467300	1467300	0	0
IYIDSNNNPER	ATHNALAKIYIDSNNN	DSNNNPERFLRENPYY	K	I	Y	E	R	F	0	1	3	1	0	0	1	0	0	2	0	0	0	0	1	1	0	0	1	0	0	11	0	1333.6262	P49951;F1MPU0	P49951	882	892	yes	no	2	9.0646E-25	192.38	2	4	5	1323800000	1323800000	0	0
KAEEEKAPAIPK	VRAKEPPKKAEEEKAP	EKAPAIPKAEEKKDSK	K	K	A	P	K	A	3	0	0	0	0	0	3	0	0	1	0	3	0	0	2	0	0	0	0	0	0	12	2	1309.7242	F1MSQ6	F1MSQ6	902	913	yes	yes	2;3	5.5787E-05	156.52	2	2	1	84718000	55164000	18734000	10819000
KAEEEREGEVGVPDHSPR	SPLGKDYRKAEEEREG	GVPDHSPRSSQVPKAG	R	K	A	P	R	S	1	2	0	1	0	0	5	2	1	0	0	1	0	0	2	1	0	0	0	2	0	18	2	2019.961	G3MYP5	G3MYP5	1918	1935	yes	yes	3;4	5.6425E-06	145.48	2	2	2	53812000	34169000	11453000	8189700
KAEPELDLAVK	VAEVEPSKKAEPELDL	PELDLAVKKAEQGQLD	K	K	A	V	K	K	2	0	0	1	0	0	2	0	0	0	2	2	0	0	1	0	0	0	0	1	0	11	1	1211.6762	F1MEW3	F1MEW3	1039	1049	yes	yes	2	2.2576E-05	166.7	1	1	1	56285000	27403000	18842000	10041000
KAEQGQLDIK	PELDLAVKKAEQGQLD	EQGQLDIKISDFGQMA	K	K	A	I	K	I	1	0	0	1	0	2	1	1	0	1	1	2	0	0	0	0	0	0	0	0	0	10	1	1128.6139	F1MEW3	F1MEW3	1050	1059	yes	yes	2	0.00031338	188.27	1	1	1	157880000	107550000	25660000	24672000
KASDKLDTVLEK	SREFDQEKKASDKLDT	KLDTVLEKSEEHADSK	K	K	A	E	K	S	1	0	0	2	0	0	1	0	0	0	2	3	0	0	0	1	1	0	0	1	0	12	2	1345.7453	F1MEW3	F1MEW3	958	969	yes	yes	2;3	7.6916E-07	196.33	2	2	2	50388000	27094000	12008000	11285000
KAVDVFFPPEAQNDFPVAMQISEK	TGNQPFPKKAVDVFFP	VAMQISEKHDVVFLIT	K	K	A	E	K	H	3	0	1	2	0	2	2	0	0	1	0	2	1	3	3	1	0	0	0	3	0	24	1	2706.3363	P49951;F1MPU0	P49951	246	269	yes	no	2;3	0.0022042	92.147	3	3	3	479930000	189930000	112840000	177160000
KDEDLEPK	QKDQAPERKDEDLEPK	KDEDLEPKDRGLEHRD	R	K	D	P	K	D	0	0	0	2	0	0	2	0	0	0	1	2	0	0	1	0	0	0	0	0	0	8	1	972.47639	F1N3M8;G3MYP5	G3MYP5	1428	1435	no	no	2	0.015183	80.676		1		2298100	0	2298100	0
KDEVLEEK	QRDTAICRKDEVLEEK	KDEVLEEKDKAGEPQD	R	K	D	E	K	D	0	0	0	1	0	0	3	0	0	0	1	2	0	0	0	0	0	0	0	1	0	8	1	988.50769	F1N3M8;G3MYP5	G3MYP5	1386	1393	no	no	2	0.0017803	188.3	1		1	6128900	4616200	0	1512700
KDEVLEEKDK	QRDTAICRKDEVLEEK	EVLEEKDKAGEPQDQA	R	K	D	D	K	A	0	0	0	2	0	0	3	0	0	0	1	3	0	0	0	0	0	0	0	1	0	10	2	1231.6296	F1N3M8;G3MYP5	G3MYP5	1386	1395	no	no	2;3	2.9245E-05	229	2	2	2	52492000	26293000	12765000	13434000
KDEWGLVAPVSPGPLTPMK	IQMPTEAKKDEWGLVA	PGPLTPMKEKDVLEDI	K	K	D	M	K	E	1	0	0	1	0	0	1	2	0	0	2	2	1	0	4	1	1	1	0	2	0	19	1	2021.0656	F1MEW3	F1MEW3	275	293	yes	yes	2;3	0.0061436	86.539		2	2	0	0	0	0
KDEWGLVAPVSPGPLTPMKEK	IQMPTEAKKDEWGLVA	PLTPMKEKDVLEDIPK	K	K	D	E	K	D	1	0	0	1	0	0	2	2	0	0	2	3	1	0	4	1	1	1	0	2	0	21	2	2278.2031	F1MEW3	F1MEW3	275	295	yes	yes	3	0.02776	90.758	1	1	1	0	0	0	0
KDIEESSLVK	EAAIRALRKDIEESSL	IEESSLVKVELDKKVQ	R	K	D	V	K	V	0	0	0	1	0	0	2	0	0	1	1	2	0	0	0	2	0	0	0	1	0	10	1	1146.6132	F1MDZ2;O77788	F1MDZ2	208	217	yes	no	2	0.00032602	171.09	1	1	1	10006000	5894400	1889500	2221800
KDLEEWNQR	QEWREKAKKDLEEWNQ	DLEEWNQRQSEQVEKN	K	K	D	Q	R	Q	0	1	1	1	0	1	2	0	0	0	1	1	0	0	0	0	0	1	0	0	0	9	1	1216.5836	P04975;G3N252	P04975	133	141	yes	no	2;3	3.9003E-15	266.91	2	2	2	307750000	147020000	93917000	66815000
KDLYANTVLSGGTTMYPGIADR	MKCDVDIRKDLYANTV	MYPGIADRMQKEITAL	R	K	D	D	R	M	2	1	1	2	0	0	0	3	0	1	2	1	1	0	1	1	3	0	2	1	0	22	1	2342.1576	P63258;P60712	P63258	291	312	yes	no	2;3	2.3625E-06	118.37	2	2	2	0	0	0	0
KDPELWGSVLLESNPYR	LSRYLVRRKDPELWGS	LLESNPYRRPLIDQVV	R	K	D	Y	R	R	0	1	1	1	0	0	2	1	0	0	3	1	0	0	2	2	0	1	1	1	0	17	1	2002.016	P49951	P49951	951	967	yes	yes	2;3	1.2096E-12	207.56	2	2	2	1759100000	798550000	540050000	420460000
KDSLYK	KQSVELCKKDSLYKDA	CKKDSLYKDAMQYASE	K	K	D	Y	K	D	0	0	0	1	0	0	0	0	0	0	1	2	0	0	0	1	0	0	1	0	0	6	1	752.40685	P49951;F1MPU0	P49951	1530	1535	yes	no	2	0.057002	126.2	1	1	1	179640000	96921000	47765000	34956000
KDTKPEVK	DAKKEEKKKDTKPEVK	KDTKPEVKKISKPDLK	K	K	D	V	K	K	0	0	0	1	0	0	1	0	0	0	0	3	0	0	1	0	1	0	0	1	0	8	2	943.53385	F1N3M8;G3MYP5	G3MYP5	450	457	no	no	3	0.050861	77.318	1			114560	114560	0	0
KEAPKPEEK	SKKDEVPKKEAPKPEE	EAPKPEEKKEPAVEKP	K	K	E	E	K	K	1	0	0	0	0	0	3	0	0	0	0	3	0	0	2	0	0	0	0	0	0	9	2	1054.5659	F1MSQ6	F1MSQ6	928	936	yes	yes	3	0.060315	60.717	1			215960	215960	0	0
KEDIAINGEVEGKEEEQETK	EGGLKESRKEDIAING	KEEEQETKEKGSGGEE	R	K	E	T	K	E	1	0	1	1	0	1	7	2	0	2	0	3	0	0	0	0	1	0	0	1	0	20	2	2274.0863	F1MDZ2;O77788	F1MDZ2	808	827	yes	no	2;3;4	3.6191E-28	298.96	7	5	5	4752000	4752000	0	0
KEETPAAPEKK	SKAAEKPKKEETPAAP	TPAAPEKKDAKEGKAA	K	K	E	K	K	D	2	0	0	0	0	0	3	0	0	0	0	3	0	0	2	0	1	0	0	0	0	11	2	1226.6507	F1MSQ6	F1MSQ6	1007	1017	yes	yes	2;3	0.001044	126.83	1	2	1	66454000	37222000	19391000	9842200
KEPDDAKPK	KEKTEVAKKEPDDAKP	EPDDAKPKEPSKAAEK	K	K	E	P	K	E	1	0	0	2	0	0	1	0	0	0	0	3	0	0	2	0	0	0	0	0	0	9	2	1026.5346	F1MSQ6	F1MSQ6	988	996	yes	yes	3	0.024576	95.09	1			294780	294780	0	0
KEPSTVSRDEVR	TPERKIAKKEPSTVSR	TVSRDEVRRKKGSFHN	K	K	E	V	R	R	0	2	0	1	0	0	2	0	0	0	0	1	0	0	1	2	1	0	0	2	0	12	2	1401.7212	F1MEW3	F1MEW3	1458	1469	yes	yes	3	0.00040318	132.03	1	1	1	21451000	12340000	5624800	3486400
KESKEETPEVTK	PLPSKTVRKESKEETP	EETPEVTKGLEKAPKV	R	K	E	T	K	G	0	0	0	0	0	0	4	0	0	0	0	3	0	0	1	1	2	0	0	1	0	12	2	1403.7144	F1N1S2	F1N1S2	559	570	yes	yes	2	5.2455E-18	189.99		1		0	0	0	0
KFDDFQK	EQVEVLQKKFDDFQKD	KKFDDFQKDLKANESR	K	K	F	Q	K	D	0	0	0	2	0	1	0	0	0	0	0	2	0	2	0	0	0	0	0	0	0	7	1	926.44978	E1BFB0	E1BFB0	1132	1138	yes	yes	2	0.01654	161.12	1	1	1	9848100	4970500	2637600	2240000
KFDVNTSAVQVLIEHIGNLDR	EEAFAIFRKFDVNTSA	EHIGNLDRAYEFAERC	R	K	F	D	R	A	1	1	2	2	0	1	1	1	1	2	2	1	0	1	0	1	1	0	0	3	0	21	1	2367.2547	P49951;F1MPU0	P49951	1074	1094	yes	no	2;3;4	1.3636E-66	357.5	9	8	7	4824000000	2188300000	1413800000	1221900000
KFEEFQTDMAAHEER	EHVEVLQKKFEEFQTD	DMAAHEERVNEVNQFA	K	K	F	E	R	V	2	1	0	1	0	1	4	0	1	0	0	1	1	2	0	0	1	0	0	0	0	15	1	1866.8207	E1BFB0	E1BFB0	190	204	yes	yes	2;3	0.00030875	110.84	2	1	1	0	0	0	0
KFLSDPQVHTVLVER	KSALEQMRKFLSDPQV	VHTVLVERSTLKEDVG	R	K	F	E	R	S	0	1	0	1	0	1	1	0	1	0	2	1	0	1	1	1	1	0	0	3	0	15	1	1766.9679	E1BDX8	E1BDX8	66	80	yes	yes	3	1.7387E-08	156	1			9018000	9018000	0	0
KFNALFAQGNYSEAAK	GAEELFARKFNALFAQ	GNYSEAAKVAANAPKG	R	K	F	A	K	V	4	0	2	0	0	1	1	1	0	0	1	2	0	2	0	1	0	0	1	0	0	16	1	1757.8737	P49951;F1MPU0	P49951	367	382	yes	no	2;3	1.8517E-21	236.78	7	8	8	4999700000	2638900000	1387900000	972940000
KGADEAALAR	EGRLMEARKGADEAAL	ADEAALARAELEKRID	R	K	G	A	R	A	4	1	0	1	0	0	1	1	0	0	1	1	0	0	0	0	0	0	0	0	0	10	1	1000.5302	P02548	P02548	197	206	yes	yes	2	4.1845E-05	211.86	1	1	1	360870000	194480000	99800000	66590000
KGDILTLLNSTNKDWWK	SPREVTMKKGDILTLL	STNKDWWKVEVNDRQG	K	K	G	W	K	V	0	0	2	2	0	0	0	1	0	1	3	3	0	0	0	1	2	2	0	0	0	17	2	2031.0789	E1BFB0	E1BFB0	990	1006	yes	yes	3	0.00030366	107.98			1	3075300	0	0	3075300
KGDLQWNAGEK	GISGTTSKKGDLQWNA	LQWNAGEKKLTGGANW	K	K	G	E	K	K	1	0	1	1	0	1	1	2	0	0	1	2	0	0	0	0	0	1	0	0	0	11	1	1244.6149	F1MGT4	F1MGT4	727	737	yes	yes	2	2.0867E-17	269.04	1	1	1	17631000	8121400	5251700	4258100
KHEAFETDFTVHK	AAIQGLLKKHEAFETD	ETDFTVHKDRVNDVCT	K	K	H	H	K	D	1	0	0	1	0	0	2	0	2	0	0	2	0	2	0	0	2	0	0	1	0	13	1	1587.7682	E1BFB0	E1BFB0	1911	1923	yes	yes	3;4	0.00093511	79.875		1	1	6438800	0	3648900	2789900
KHEAIETDIAAYEER	PAVEAATKKHEAIETD	DIAAYEERVQAVVAVA	K	K	H	E	R	V	3	1	0	1	0	0	4	0	1	2	0	1	0	0	0	0	1	0	1	0	0	15	1	1773.8533	F1MYC9	F1MYC9	463	477	yes	yes	3	1.3231E-06	140.96	1	1		14576000	10028000	4548300	0
KHQALQAEIAGHEPR	IGVQNLLKKHQALQAE	EIAGHEPRIKAVTQKG	K	K	H	P	R	I	3	1	0	0	0	2	2	1	2	1	1	1	0	0	1	0	0	0	0	0	0	15	1	1683.8805	E1BFB0	E1BFB0	825	839	yes	yes	4	0.00051834	82.578	1		1	14031000	11106000	0	2924900
KIDLSHVTSK	GQVQIVTKKIDLSHVT	DLSHVTSKCGSLKNIR	K	K	I	S	K	C	0	0	0	1	0	0	0	0	1	1	1	2	0	0	0	2	1	0	0	1	0	10	1	1126.6346	F1MEW3	F1MEW3	1706	1715	yes	yes	2;3	0.00091569	156.02	2	2	2	126690000	71348000	28814000	26530000
KIESLEEEIR	LARLDLERKIESLEEE	ESLEEEIRFLRKIHEE	R	K	I	I	R	F	0	1	0	0	0	0	4	0	0	2	1	1	0	0	0	1	0	0	0	0	0	10	1	1244.6612	Q28115	Q28115	185	194	yes	yes	2;3	0.00018476	190.88	2	2	2	263120000	137440000	71831000	53854000
KIHEEEVR	EEEIRFLRKIHEEEVR	KIHEEEVRELQEQLAQ	R	K	I	V	R	E	0	1	0	0	0	0	3	0	1	1	0	1	0	0	0	0	0	0	0	1	0	8	1	1038.5458	Q28115	Q28115	198	205	yes	yes	2;3	0.0020378	149.27	2	2	2	110490000	69992000	23419000	17076000
KLAVNMVPFPR	GQLNADLRKLAVNMVP	VNMVPFPRLHFFMPGF	R	K	L	P	R	L	1	1	1	0	0	0	0	0	0	0	1	1	1	1	2	0	0	0	0	2	0	11	1	1270.722	Q2KJD0;Q3MHM5;G3X7R8;Q2HJ81;E1BJB1;Q6B856;G3X7R7;G3N1W7;E1BJK2;CON__ENSEMBL:ENSBTAP00000025008;Q2T9S0;Q3ZBU7	Q3MHM5	252	262	no	no	2;3	0.0001063	118.6	2	1	2	0	0	0	0
KLDPAQSASR	FVPAAYVKKLDPAQSA	DPAQSASRENLLEEQG	K	K	L	S	R	E	2	1	0	1	0	1	0	0	0	0	1	1	0	0	1	2	0	0	0	0	0	10	1	1071.5673	E1BFB0	E1BFB0	1023	1032	yes	yes	2	0.00071988	163.84	1	1	1	18804000	10873000	4545200	3386300
KLEHLITELVHQR	EQPPLRRRKLEHLITE	ITELVHQRDVTRSLIK	R	K	L	Q	R	D	0	1	0	0	0	1	2	0	2	1	3	1	0	0	0	0	1	0	0	1	0	13	1	1614.9206	E1BDX8	E1BDX8	1807	1819	yes	yes	3	6.672E-10	201.48			1	4188500	0	0	4188500
KLLEGEENR	DIEIATYRKLLEGEEN	LLEGEENRITIPVQTF	R	K	L	N	R	I	0	1	1	0	0	0	3	1	0	0	2	1	0	0	0	0	0	0	0	0	0	9	1	1086.5669	Q28115	Q28115	364	372	yes	yes	2;3	0.00058366	172.98	2	2	2	199950000	121540000	41670000	36742000
KLLEGEETR	DIEIAAYRKLLEGEET	LLEGEETRFSTFAGSI	R	K	L	T	R	F	0	1	0	0	0	0	3	1	0	0	2	1	0	0	0	0	1	0	0	0	0	9	1	1073.5717	P02548;F1MDZ2;O77788;Q08DH7	F1MDZ2	403	411	no	no	2;3	0.0017366	171.5	2	2	2	451320000	259870000	106210000	85240000
KLNEILQAR	ITHAVVIKKLNEILQA	LNEILQARGKKGTDRA	K	K	L	A	R	G	1	1	1	0	0	1	1	0	0	1	2	1	0	0	0	0	0	0	0	0	0	9	1	1083.64	Q3SYW6	Q3SYW6	331	339	yes	yes	2	0.00079223	186.76			1	979850	0	0	979850
KLPEELGRDQNTVETLQR	GRIQDKHKKLPEELGR	NTVETLQRMHTTFEHD	K	K	L	Q	R	M	0	2	1	1	0	2	3	1	0	0	3	1	0	0	1	0	2	0	0	1	0	18	2	2125.1127	F1MYC9	F1MYC9	1826	1843	yes	yes	3	0.0048247	94.281	1			5100200	5100200	0	0
KLVPLLLEDGGEAPAALEAALEEK	SVLQKHLRKLVPLLLE	LEAALEEKSALEQMRK	R	K	L	E	K	S	5	0	0	1	0	0	5	2	0	0	6	2	0	0	2	0	0	0	0	1	0	24	1	2475.3472	E1BDX8	E1BDX8	35	58	yes	yes	3	0.056128	29.855			1	3680900	0	0	3680900
KMEEKAEEVAPK	AAEAKEEKKMEEKAEE	KAEEVAPKEELAAEAK	K	K	M	P	K	E	2	0	0	0	0	0	4	0	0	0	0	3	1	0	1	0	0	0	0	1	0	12	2	1387.7017	F1MDZ2;O77788	F1MDZ2	592	603	yes	no	3	2.7357E-05	168.18	1	1	1	0	0	0	0
KNNHHEENISSK	TNGQDLVKKNNHHEEN	HEENISSKMKGLNGKV	K	K	N	S	K	M	0	0	3	0	0	0	2	0	2	1	0	2	0	0	0	2	0	0	0	0	0	12	1	1435.6804	E1BFB0	E1BFB0	1939	1950	yes	yes	3	2.4881E-05	139.48	1	1	1	1263500	683500	318880	261130
KNVESTLR	LEEEITLRKNVESTLR	KNVESTLRQLEREKAL	R	K	N	L	R	Q	0	1	1	0	0	0	1	0	0	0	1	1	0	0	0	1	1	0	0	1	0	8	1	945.52434	F1N319;Q28021	F1N319	445	452	yes	no	2	0.06038	50.04		1		348690	0	348690	0
KPGNNEGSGAPSPLSK	HLNTLEGKKPGNNEGS	GAPSPLSKSSPATTVT	K	K	P	S	K	S	1	0	2	0	0	0	1	3	0	0	1	2	0	0	3	3	0	0	0	0	0	16	1	1538.7689	F1MGT4	F1MGT4	245	260	yes	yes	2	4.3008E-07	156.96	1			12831000	12831000	0	0
KQEAEWK	EALDANSRKQEAEWKE	RKQEAEWKEKAIKELD	R	K	Q	W	K	E	1	0	0	0	0	1	2	0	0	0	0	2	0	0	0	0	0	1	0	0	0	7	1	917.46068	P04973	P04973	125	131	yes	yes	2;3	0.0038844	151.5	2	2	2	895790000	476250000	242730000	176820000
KQEAEWKEK	EALDANSRKQEAEWKE	QEAEWKEKAIKELDEW	R	K	Q	E	K	A	1	0	0	0	0	1	3	0	0	0	0	3	0	0	0	0	0	1	0	0	0	9	2	1174.5982	P04973	P04973	125	133	yes	yes	2;3	0.00010754	176.48	2	2	2	502820000	268980000	139460000	94376000
KQEALVAR	FDAENIKKKQEALVAR	KQEALVARYEALKEPM	K	K	Q	A	R	Y	2	1	0	0	0	1	1	0	0	0	1	1	0	0	0	0	0	0	0	1	0	8	1	913.53451	E1BFB0	E1BFB0	758	765	yes	yes	2	0.0056127	145.16	1			4045500	4045500	0	0
KQLLEK	RPVLQQGRKQLLEKWL	GRKQLLEKWLKEDKLE	R	K	Q	E	K	W	0	0	0	0	0	1	1	0	0	0	2	2	0	0	0	0	0	0	0	0	0	6	1	757.46979	P49951;F1MPU0	P49951	445	450	yes	no	2	0.042824	154.09	1	1	1	944730000	534730000	272480000	137520000
KQNLLASK	LLEPLNERKQNLLASK	KQNLLASKEIHQFNRD	R	K	Q	S	K	E	1	0	1	0	0	1	0	0	0	0	2	2	0	0	0	1	0	0	0	0	0	8	1	900.53927	F1MYC9	F1MYC9	1478	1485	yes	yes	2	0.017516	67.081	1			3024600	3024600	0	0
KSPTPVAEAK	KKLPKDTKKSPTPVAE	PTPVAEAKKPAALKPK	K	K	S	A	K	K	2	0	0	0	0	0	1	0	0	0	0	2	0	0	2	1	1	0	0	1	0	10	1	1026.571	F1N1S2	F1N1S2	741	750	yes	yes	2	0.0015639	145.23	1	1	1	39444000	21350000	11026000	7067300
KSVPSETVVEESSTGLPPVTDENHIIVK	ADTDVARRKSVPSETV	DENHIIVKTDSQLEDL	R	K	S	V	K	T	0	0	1	1	0	0	4	1	1	2	1	2	0	0	3	4	3	0	0	5	0	28	1	2990.5448	F1MEW3	F1MEW3	835	862	yes	yes	3	0.02694	54.167	1	1	1	41777000	21863000	10046000	9868500
KTDDVEDMSSQAGLTLDER	KEDFGQEKKTDDVEDM	AGLTLDERKLGGDVSP	K	K	T	E	R	K	1	1	0	4	0	1	2	1	0	0	2	1	1	0	0	2	2	0	0	1	0	19	1	2108.9532	F1N1S2	F1N1S2	1471	1489	yes	yes	2;3	1.0016E-08	149.71	2	2	2	0	0	0	0
KTSQIGESFEEILEETVISTK	EASKIASKKTSQIGES	EETVISTKKTEKSNIE	K	K	T	T	K	K	0	0	0	0	0	1	5	1	0	3	1	2	0	1	0	3	3	0	0	1	0	21	1	2367.2057	Q08DH7	Q08DH7	462	482	yes	yes	2	2.0938E-12	166.75	1	1	1	53476000	31055000	12965000	9455000
KTTAAGAESAQAPSVFK	THLSCVKRKTTAAGAE	AQAPSVFKQAKDKVSD	R	K	T	F	K	Q	5	0	0	0	0	1	1	1	0	0	0	2	0	1	1	2	2	0	0	1	0	17	1	1662.8577	F1MEW3	F1MEW3	1514	1530	yes	yes	2;3	1.7356E-12	201.14	2	2	2	116130000	75202000	27122000	13810000
KVAELEEEQSQGSSSYSDWVK	GINGLLQRKVAELEEE	SSYSDWVKNLISPELG	R	K	V	V	K	N	1	0	0	1	0	2	4	1	0	0	1	2	0	0	0	5	0	1	1	2	0	21	1	2385.0972	F1N3M8;G3MYP5	G3MYP5	105	125	no	no	2;3	4.3645E-21	211.06	1	2	2	80850000	34498000	22750000	23602000
KVEDLFLTFAK	LEAQSHFRKVEDLFLT	DLFLTFAKKASAFNSW	R	K	V	A	K	K	1	0	0	1	0	0	1	0	0	0	2	2	0	2	0	0	1	0	0	1	0	11	1	1309.7282	E1BFB0	E1BFB0	2088	2098	yes	yes	2	8.2421E-06	181.44	1	1	1	31786000	18128000	6170600	7488200
KVESLLDELAFVR	LARLDLEKKVESLLDE	LDELAFVRQVHDEEVA	K	K	V	V	R	Q	1	1	0	1	0	0	2	0	0	0	3	1	0	1	0	1	0	0	0	2	0	13	1	1517.8453	Q08DH7	Q08DH7	216	228	yes	yes	2;3	1.0891E-12	244.71	2	2	2	492470000	275410000	135720000	81342000
KVFGDGSR	LCASSSYRKVFGDGSR	KVFGDGSRLSSRLSGA	R	K	V	S	R	L	0	1	0	1	0	0	0	2	0	0	0	1	0	1	0	1	0	0	0	1	0	8	1	864.44537	Q08DH7	Q08DH7	17	24	yes	yes	2	0.0046007	169.09	2	2	2	87706000	44714000	25597000	17395000
KVGYTPDWIFLLR	QKIVLYAKKVGYTPDW	PDWIFLLRNVMRISPD	K	K	V	L	R	N	0	1	0	1	0	0	0	1	0	1	2	1	0	1	1	0	1	1	1	1	0	13	1	1606.8871	P49951;F1MPU0	P49951	507	519	yes	no	2;3	1.5807E-06	177.38	2	2	2	2385900000	1214800000	715080000	456020000
KVHEEEIAELQAQIQYAQISVEMDVSSKPDLSAALK	MDEIAFLKKVHEEEIA	PDLSAALKDIRAQYEK	K	K	V	L	K	D	5	0	0	2	0	4	5	0	1	3	3	3	1	0	1	4	0	0	1	3	0	36	2	3997.0354	P02548	P02548	225	260	yes	yes	3	0.062118	72.389	1		1	0	0	0	0
KVMSQEIQEQLHK	DQQEAEKKKVMSQEIQ	EIQEQLHKQQEVIADK	K	K	V	H	K	Q	0	0	0	0	0	3	2	0	1	1	1	2	1	0	0	1	0	0	0	1	0	13	1	1596.8294	E1BDX8	E1BDX8	3254	3266	yes	yes	3	1.5242E-05	139.86	1	1	1	0	0	0	0
KVSQPIEGHAASFAQFK	MQLYSVDRKVSQPIEG	AASFAQFKMEGNAEES	R	K	V	F	K	M	3	0	0	0	0	2	1	1	1	1	0	2	0	2	1	2	0	0	0	1	0	17	1	1843.9581	P49951;F1MPU0	P49951	189	205	yes	no	2;3;4	4.4846E-10	169.43	4	4	4	3357900000	1666000000	1114700000	577260000
KVWFPHELGGPGAR	WQELSCERKVWFPHEL	ELGGPGARPRYTEERE	R	K	V	A	R	P	1	1	0	0	0	0	1	3	1	0	1	1	0	1	2	0	0	1	0	1	0	14	1	1549.8154	F1N3M8;G3MYP5	G3MYP5	1712	1725	no	no	3	0.000288	109.44	1			12101000	12101000	0	0
KWREEQR	TQEPESIRKWREEQRK	RKWREEQRKRLQELDA	R	K	W	Q	R	K	0	2	0	0	0	1	2	0	0	0	0	1	0	0	0	0	0	1	0	0	0	7	2	1030.5308	P04975;G3N252;F1MX40	P04975	104	110	yes	no	2;3	0.010057	192.58	2	2	2	586160000	327050000	143920000	115190000
KWREEQTER	QSEPESIRKWREEQTE	WREEQTERLEALDANS	R	K	W	E	R	L	0	2	0	0	0	1	3	0	0	0	0	1	0	0	0	0	1	1	0	0	0	9	2	1260.6211	P04973	P04973	107	115	yes	yes	2;3	3.5467E-06	246.63	2	2	2	979090000	521130000	248030000	209930000
KYEDEINKR	DLVEDYKKKYEDEINK	YEDEINKRTAAENDFV	K	K	Y	K	R	T	0	1	1	1	0	0	2	0	0	1	0	2	0	0	0	0	0	0	1	0	0	9	2	1193.6041	CON__P35908;CON__Q7Z794	CON__P35908	273	281	no	no	2;3	9.1342E-10	250.06	2	2	2	45226000	25664000	12764000	6798100
KYEFGESDLR	YAPLGWSKKYEFGESD	EFGESDLRSACDTVDT	K	K	Y	L	R	S	0	1	0	1	0	0	2	1	0	0	1	1	0	1	0	1	0	0	1	0	0	10	1	1242.5881	E1BDX8	E1BDX8	4204	4213	yes	yes	2	0.0013939	143.5	1			2917200	2917200	0	0
LAADDFR	LLQIDNARLAADDFRL	RLAADDFRLKYENEVA	R	L	A	F	R	L	2	1	0	2	0	0	0	0	0	0	1	0	0	1	0	0	0	0	0	0	0	7	0	806.39227	CON__P13645;P06394;A6QNZ7;CON__P02535-1;CON__P08730-1;Q17QL7;CON__A2A4G1;CON__P08779;CON__P08727;CON__P19001;CON__ENSEMBL:ENSP00000377550;CON__P19012;Q148H6;CON__Q148H6;F1MJ66;CON__Q7Z3Y7;CON__P05784;CON__Q9Z2K1;CON__Q3ZAW8;F1MFW9;CON__Q2M2I5;F1MXG6;F1MSA6;P08728;CON__Q14525;A6QP90;Q148I8;CON__Q9UE12;CON__Q15323;CON__A2A5Y0;CON__Q92764;A7YWM2;CON__Q14532;E1BPW6;E1BFG1;CON__Q6IFX2;CON__A2AB72;Q0P5…	CON__P13645	229	235	no	no	2	0.0034703	150.02	1	1	1	37120000	19807000	10012000	7301900
LAAEDATNEK	EQEIRDLRLAAEDATN	AEDATNEKQALQGERE	R	L	A	E	K	Q	3	0	1	1	0	0	2	0	0	0	1	1	0	0	0	0	1	0	0	0	0	10	0	1060.5037	P02548	P02548	148	157	yes	yes	2	7.1082E-05	170.47	2	1	1	352300000	197230000	84828000	70238000
LAALADQWQFLVQK	SEDAVKARLAALADQW	QWQFLVQKSAEKSQKL	R	L	A	Q	K	S	3	0	0	1	0	3	0	0	0	0	3	1	0	1	0	0	0	1	0	1	0	14	0	1629.8879	E1BFB0	E1BFB0	1633	1646	yes	yes	2	0.0001036	112.44		1	1	11068000	0	7052800	4014900
LADVYQAELR	LRAKEPTKLADVYQAE	DVYQAELRELRLRLDQ	K	L	A	L	R	E	2	1	0	1	0	1	1	0	0	0	2	0	0	0	0	0	0	0	1	1	0	10	0	1176.6139	Q28115	Q28115	108	117	yes	yes	1;2	3.6874E-12	211.64	1	1	2	218610000	106950000	62154000	49499000
LAELEEFINGPNNAHIQQVGDR	FALAKTNRLAELEEFI	HIQQVGDRCYDEKMYD	R	L	A	D	R	C	2	1	3	1	0	2	3	2	1	2	2	0	0	1	1	0	0	0	0	1	0	22	0	2463.2142	P49951;F1MPU0	P49951	1183	1204	yes	no	2;3	3.1686E-09	141.78	6	5	6	3612100000	1658700000	1115700000	837630000
LALDLEIATYR	YQELMNTKLALDLEIA	DLEIATYRTLLEGEES	K	L	A	Y	R	T	2	1	0	1	0	0	1	0	0	1	3	0	0	0	0	0	1	0	1	0	0	11	0	1276.7027	CON__P04264	CON__P04264	473	483	yes	yes	2	9.6544E-09	205.13	1	1	1	56183000	28201000	14015000	13967000
LAQFVEHWK	GKEEIQQRLAQFVEHW	AQFVEHWKELKQLAAA	R	L	A	W	K	E	1	0	0	0	0	1	1	0	1	0	1	1	0	1	0	0	0	1	0	1	0	9	0	1156.6029	E1BFB0	E1BFB0	1845	1853	yes	yes	2;3	0.0040114	108.26		2	1	11875000	0	8040000	3835500
LASTLVHLGEYQAAVDGAR	NNVSNFGRLASTLVHL	QAAVDGARKANSTRTW	R	L	A	A	R	K	4	1	0	1	0	1	1	2	1	0	3	0	0	0	0	1	1	0	1	2	0	19	0	1970.0221	P49951;F1MPU0	P49951	1227	1245	yes	no	2;3	1.837E-21	202.94	6	3	3	7353700000	3791600000	1900700000	1661500000
LASVSADTDVAR	DLAGTRSRLASVSADT	SADTDVARRKSVPSET	R	L	A	A	R	R	3	1	0	2	0	0	0	0	0	0	1	0	0	0	0	2	1	0	0	2	0	12	0	1203.6095	F1MEW3	F1MEW3	822	833	yes	yes	2	8.2988E-07	167.18	1	1	1	144030000	74267000	36456000	33304000
LASYLDK	TMQNLNDRLASYLDKV	RLASYLDKVRALEESN	R	L	A	D	K	V	1	0	0	1	0	0	0	0	0	0	2	1	0	0	0	1	0	0	1	0	0	7	0	808.43307	CON__P13645;P06394;A6QNZ7;CON__P08730-1;CON__A2A4G1;CON__P08779;CON__P08727;CON__P19001;CON__P19012;F1MJ66;CON__P05784;CON__Q99456;G3X7W8;G3MX98;CON__P35527	CON__P13645	157	163	no	no	2	0.0068945	120.49	1	1	1	51689000	30426000	12938000	8324500
LASYLDKVQALEEANNDLENK	TMQELNSRLASYLDKV	ANNDLENKIQDWYDKK	R	L	A	N	K	I	3	0	3	2	0	1	3	0	0	0	4	2	0	0	0	1	0	0	1	1	0	21	1	2376.1809	CON__P35527	CON__P35527	164	184	yes	yes	2	4.0048E-22	223.51	1	1	1	25203000	9105400	7226300	8871000
LASYLDKVR	TMQNLNDRLASYLDKV	ASYLDKVRALEESNYE	R	L	A	V	R	A	1	1	0	1	0	0	0	0	0	0	2	1	0	0	0	1	0	0	1	1	0	9	1	1063.6026	CON__P13645;P06394;A6QNZ7;CON__P08730-1;CON__A2A4G1;CON__P08779;CON__P08727;CON__P19001;CON__P19012;F1MJ66;CON__Q99456	CON__P13645	157	165	no	no	2;3	0.0001186	176.6	2	2	2	44255000	26360000	11102000	6793000
LATAMQEGEYDAERPPSKPPPVELR	LLISTMNKLATAMQEG	KPPPVELRAAALRAEI	K	L	A	L	R	A	3	2	0	1	0	1	4	1	0	0	2	1	1	0	5	1	1	0	1	1	0	25	2	2780.3803	F1MIC9	F1MIC9	866	890	yes	yes	3;4	0.023386	91.238	1	1	2	0	0	0	0
LATMPPMVEGEGLASR	CRLVKRHRLATMPPMV	EGEGLASRLIEVGPSG	R	L	A	S	R	L	2	1	0	0	0	0	2	2	0	0	2	0	2	0	2	1	1	0	0	1	0	16	0	1657.8168	G3N3N0;F1MQL2;G3N0C1	G3N3N0	858	873	yes	no	2	0.012199	68.576		1	1	0	0	0	0
LAVNMVPFPR	QLNADLRKLAVNMVPF	VNMVPFPRLHFFMPGF	K	L	A	P	R	L	1	1	1	0	0	0	0	0	0	0	1	0	1	1	2	0	0	0	0	2	0	10	0	1142.627	Q2KJD0;Q3MHM5;G3X7R8;Q2HJ81;E1BJB1;Q6B856;G3X7R7;G3N1W7;E1BJK2;CON__ENSEMBL:ENSBTAP00000025008;Q2T9S0;Q3ZBU7	Q3MHM5	253	262	no	no	2	0.00078849	131.11	1	2	1	0	0	0	0
LDAPSQIEVK	LKRVTTTRLDAPSQIE	APSQIEVKDVTDTTAL	R	L	D	V	K	D	1	0	0	1	0	1	1	0	0	1	1	1	0	0	1	1	0	0	0	1	0	10	0	1098.5921	F1MRZ5;F1MRZ6	F1MRZ5	803	812	yes	no	2	2.7764E-06	116.55	1			0	0	0	0
LDASESLRK	EYLTKVDKLDASESLR	DASESLRKEEEQATET	K	L	D	R	K	E	1	1	0	1	0	0	1	0	0	0	2	1	0	0	0	2	0	0	0	0	0	9	1	1017.5455	P49951;F1MPU0	P49951	1613	1621	yes	no	2	0.0014381	177.7	1	1		8234000	6422700	1811300	0
LDENSAFLQFNWK	AASQRKAKLDENSAFL	AFLQFNWKADVVESWI	K	L	D	W	K	A	1	0	2	1	0	1	1	0	0	0	2	1	0	2	0	1	0	1	0	0	0	13	0	1610.7729	E1BFB0	E1BFB0	1972	1984	yes	yes	2	1.3892E-06	125.54	1	1	1	13104000	5028100	4110000	3965900
LDETGNLMISEGHFASETIR	ANSGAIVKLDETGNLM	HFASETIRTRLMELHR	K	L	D	I	R	T	1	1	1	1	0	0	3	2	1	2	2	0	1	1	0	2	2	0	0	0	0	20	0	2219.0528	E1BFB0	E1BFB0	102	121	yes	yes	3	0.00028425	91.589	1		1	0	0	0	0
LDHKFDLMYAK	AIAEAWARLDHKFDLM	KFDLMYAKRAFVHWYV	R	L	D	A	K	R	1	0	0	2	0	0	0	0	1	0	2	2	1	1	0	0	0	0	1	0	0	11	1	1379.6908	Q2HJ86;F2Z4C1;F6RP72;F2Z4K0;Q3ZCJ7;F1MNF8	Q2HJ86	391	401	no	no	3	0.0093132	97.957	1	1	1	0	0	0	0
LDLAGR	ALPHAILRLDLAGRDL	LRLDLAGRDLTDYLMK	R	L	D	G	R	D	1	1	0	1	0	0	0	1	0	0	2	0	0	0	0	0	0	0	0	0	0	6	0	643.36532	P63258;P60712;F1MRD0	P63258	178	183	no	no	2	0.010972	130.84	1	1	1	12346000	6454600	3279900	2611200
LDMYVLNPVK	FHKMGVGRLDMYVLNP	MYVLNPVKDSKEMQFL	R	L	D	V	K	D	0	0	1	1	0	0	0	0	0	0	2	1	1	0	1	0	0	0	1	2	0	10	0	1190.6369	F1N3M8;G3MYP5	G3MYP5	198	207	no	no	2	0.016991	97.472	1		1	0	0	0	0
LDMYVLNPVKDSK	FHKMGVGRLDMYVLNP	LNPVKDSKEMQFLMQK	R	L	D	S	K	E	0	0	1	2	0	0	0	0	0	0	2	2	1	0	1	1	0	0	1	2	0	13	1	1520.7909	F1N3M8;G3MYP5	G3MYP5	198	210	no	no	2;3	3.0991E-05	152.16	2	2	2	0	0	0	0
LDQLTANSAR	ELRELRLRLDQLTANS	QLTANSARLEVERDNL	R	L	D	A	R	L	2	1	1	1	0	1	0	0	0	0	2	0	0	0	0	1	1	0	0	0	0	10	0	1087.5622	Q28115	Q28115	123	132	yes	yes	2	2.1983E-05	190.86	1	1	1	42014000	22287000	10622000	9104900
LDSELK	QLKSDQSRLDSELKNM	SRLDSELKNMQDMVED	R	L	D	L	K	N	0	0	0	1	0	0	1	0	0	0	2	1	0	0	0	1	0	0	0	0	0	6	0	703.37522	CON__P04264	CON__P04264	252	257	no	no	2	0.00012904	134.12	1	1	1	7089700	7089700	0	0
LDSELKNMQDMVEDYR	QLKSDQSRLDSELKNM	QDMVEDYRNKYEDEIN	R	L	D	Y	R	N	0	1	1	3	0	1	2	0	0	0	2	1	2	0	0	1	0	0	1	1	0	16	1	1984.887	CON__P04264	CON__P04264	252	267	yes	yes	2;3	0.016403	114.01	2	1	1	0	0	0	0
LEAENNLAAYR	LQDETNQRLEAENNLA	ENNLAAYRQEADEATL	R	L	E	Y	R	Q	3	1	2	0	0	0	2	0	0	0	2	0	0	0	0	0	0	0	1	0	0	11	0	1262.6255	Q28115	Q28115	159	169	yes	yes	2	4.5811E-07	190.86	1	1	1	115080000	59764000	30683000	24631000
LEAENNLAAYRQEADEATLAR	LQDETNQRLEAENNLA	ADEATLARLDLERKIE	R	L	E	A	R	L	6	2	2	1	0	1	4	0	0	0	3	0	0	0	0	0	1	0	1	0	0	21	1	2347.1404	Q28115	Q28115	159	179	yes	yes	2;3	1.3227E-18	205.68	2	2	2	277490000	112230000	78950000	86313000
LEALDANSR	WREEQTERLEALDANS	EALDANSRKQEAEWKE	R	L	E	S	R	K	2	1	1	1	0	0	1	0	0	0	2	0	0	0	0	1	0	0	0	0	0	9	0	987.49852	P04973	P04973	116	124	yes	yes	2	1.1796E-05	203.35	4	3	3	1009300000	567460000	231570000	210270000
LEALDANSRK	WREEQTERLEALDANS	ALDANSRKQEAEWKEK	R	L	E	R	K	Q	2	1	1	1	0	0	1	0	0	0	2	1	0	0	0	1	0	0	0	0	0	10	1	1115.5935	P04973	P04973	116	125	yes	yes	2;3	9.9474E-05	160.75	2	2	2	56943000	36296000	11487000	9160100
LEEEGQSLKDEMAR	SYQEALARLEEEGQSL	SLKDEMARHLQEYQDL	R	L	E	A	R	H	1	1	0	1	0	1	4	1	0	0	2	1	1	0	0	1	0	0	0	0	0	14	1	1633.7618	Q28115	Q28115	327	340	yes	yes	2;3	1.9521E-10	195.24	3	4	4	39112000	20755000	11578000	6778700
LEEKPTISDK	AEKEPHLKLEEKPTIS	EKPTISDKEAMPKESE	K	L	E	D	K	E	0	0	0	1	0	0	2	0	0	1	1	2	0	0	1	1	1	0	0	0	0	10	1	1158.6132	F1MEW3	F1MEW3	444	453	yes	yes	2;3	8.464E-05	179.72	2	1	1	39894000	27889000	7505900	4499200
LEEKPTISDKEAMPK	AEKEPHLKLEEKPTIS	SDKEAMPKESEPPKLI	K	L	E	P	K	E	1	0	0	1	0	0	3	0	0	1	1	3	1	0	2	1	1	0	0	0	0	15	2	1714.8811	F1MEW3	F1MEW3	444	458	yes	yes	2;3;4	0.0021557	135.09	1	3	2	0	0	0	0
LEETQTLLR	RIEKVQTRLEETQTLL	EETQTLLRKKEKEFEE	R	L	E	L	R	K	0	1	0	0	0	1	2	0	0	0	3	0	0	0	0	0	2	0	0	0	0	9	0	1101.603	F1MIC9	F1MIC9	961	969	yes	yes	2	0.00014899	175.51	1	1	1	15736000	8596600	3605500	3534200
LEGLSESTDYTVLLQAAQDTER	DAEDTWIRLEGLSEST	QAAQDTERSSITSTAF	R	L	E	E	R	S	2	1	0	2	0	2	3	1	0	0	4	0	0	0	0	2	3	0	1	1	0	22	0	2438.1813	E1BKN2	E1BKN2	1096	1117	yes	yes	2	0.051026	51.31		1		14773000	0	14773000	0
LEKHELIEFR	DNISLAQRLEKHELIE	KHELIEFRRIAAYLFK	R	L	E	F	R	R	0	1	0	0	0	0	3	0	1	1	2	1	0	1	0	0	0	0	0	0	0	10	1	1312.7139	P49951;F1MPU0	P49951	1499	1508	yes	no	2;3;4	1.4179E-05	201.46	4	2	3	2661000000	1639000000	370590000	651440000
LEKHELIEFRR	DNISLAQRLEKHELIE	HELIEFRRIAAYLFKG	R	L	E	R	R	I	0	2	0	0	0	0	3	0	1	1	2	1	0	1	0	0	0	0	0	0	0	11	2	1468.815	P49951;F1MPU0	P49951	1499	1509	yes	no	3;4	4.1726E-05	159.99	2	2	2	79304000	46116000	19098000	14091000
LEMNLGLQK	LLRARRQRLEMNLGLQ	EMNLGLQKIFQEMLYI	R	L	E	Q	K	I	0	0	1	0	0	1	1	1	0	0	3	1	1	0	0	0	0	0	0	0	0	9	0	1044.5638	F1MYC9	F1MYC9	524	532	yes	yes	2	0.01105	120.33	1			0	0	0	0
LEMYVLNPVK	FQKMGVGKLEMYVLNP	MYVLNPVKSSKEMQYF	K	L	E	V	K	S	0	0	1	0	0	0	1	0	0	0	2	1	1	0	1	0	0	0	1	2	0	10	0	1204.6526	F1N1S2	F1N1S2	420	429	yes	yes	2	0.039564	97.597	1	1		0	0	0	0
LENEIQTYR	QLLDIKIRLENEIQTY	ENEIQTYRSLLEGEGS	R	L	E	Y	R	S	0	1	1	0	0	1	2	0	0	1	1	0	0	0	0	0	1	0	1	0	0	9	0	1164.5775	CON__P13645;P06394;A6QNZ7;CON__P02535-1	CON__P13645	442	450	yes	no	2	6.2613E-06	200.11	1	1	1	21155000	10778000	6817300	3559400
LEQEHLLEDIAHVR	GAARGQLRLEQEHLLE	LEDIAHVRQRLDDEAR	R	L	E	V	R	Q	1	1	0	1	0	1	3	0	2	1	3	0	0	0	0	0	0	0	0	1	0	14	0	1700.8846	F1MSQ6	F1MSQ6	165	178	yes	yes	3;4	1.0538E-16	223.06	1	2	1	336690000	143210000	134920000	58556000
LEVERDNLAQDLGTLR	QLTANSARLEVERDNL	AQDLGTLRQKLQDETN	R	L	E	L	R	Q	1	2	1	2	0	1	2	1	0	0	4	0	0	0	0	0	1	0	0	1	0	16	1	1840.9643	Q28115	Q28115	133	148	yes	yes	2;3	7.3185E-09	172.32	2	1	2	447430000	238670000	111190000	97575000
LFGAAEVQR	LALQRQGKLFGAAEVQ	FGAAEVQRFNRDVDET	K	L	F	Q	R	F	2	1	0	0	0	1	1	1	0	0	1	0	0	1	0	0	0	0	0	1	0	9	0	989.52943	E1BFB0	E1BFB0	251	259	yes	yes	2	0.00014495	178.94	1	1	1	17250000	9651200	4774000	2824800
LGDSHDLQR	RADQRKAKLGDSHDLQ	GDSHDLQRFLSDFRDL	K	L	G	Q	R	F	0	1	0	2	0	1	0	1	1	0	2	0	0	0	0	1	0	0	0	0	0	9	0	1039.5047	E1BFB0	E1BFB0	1335	1343	yes	yes	3	0.011183	83.783	1		1	9729400	7777900	0	1951500
LGEDNINVVEGNEQFISASK	YKSGIQVRLGEDNINV	EQFISASKSIVHPSYN	R	L	G	S	K	S	1	0	3	1	0	1	3	2	0	2	1	1	0	1	0	2	0	0	0	2	0	20	0	2162.0491	P00760	P00760	73	92	yes	yes	2	8.1024E-09	144.27	3	3	2	3072200000	1397900000	770720000	903590000
LGESQTLQQFSR	QMIEKRSKLGESQTLQ	QTLQQFSRDVDEIEAW	K	L	G	S	R	D	0	1	0	0	0	3	1	1	0	0	2	0	0	1	0	2	1	0	0	0	0	12	0	1392.6997	E1BFB0	E1BFB0	1547	1558	yes	yes	2	2.3859E-18	249.2	1	1	1	23514000	9227100	7831200	6455400
LGIQAEPLYR	LTLQHLNRLGIQAEPL	IQAEPLYRVVSNTIEP	R	L	G	Y	R	V	1	1	0	0	0	1	1	1	0	1	2	0	0	0	1	0	0	0	1	0	0	10	0	1158.6397	F1N3M8;G3MYP5	G3MYP5	169	178	no	no	2	1.0074E-05	195.79	1	1	1	58844000	37355000	12417000	9071700
LGSLVENNER	LALQLAEKLGSLVENN	SLVENNERVFDHKQGT	K	L	G	E	R	V	0	1	2	0	0	0	2	1	0	0	2	0	0	0	0	1	0	0	0	1	0	10	0	1129.5728	Q3SYW6	Q3SYW6	862	871	yes	yes	2	0.00025788	135.86	1			3369900	3369900	0	0
LHFFMPGFAPLTSR	VNMVPFPRLHFFMPGF	GFAPLTSRGSQQYRAL	R	L	H	S	R	G	1	1	0	0	0	0	0	1	1	0	2	0	1	3	2	1	1	0	0	0	0	14	0	1619.8283	Q2KJD0;Q3MHM5;E1BJB1;Q6B856;G3X7R7;G3N1W7;Q3ZBU7	Q3MHM5	263	276	no	no	2;3	8.3441E-05	139.7	1	2	2	0	0	0	0
LHGQYGPPMFAAPGHALHPGEPALGEAEER	ANVQMSEKLHGQYGPP	ALGEAEERCLSPDDST	K	L	H	E	R	C	5	1	0	0	0	1	4	5	3	0	3	0	1	1	5	0	0	0	1	0	0	30	0	3135.4985	F1N3M8;G3MYP5	G3MYP5	947	976	no	no	3;4;5	6.0091E-07	113.15	3	3	3	0	0	0	0
LHIIEVGTPPTGNQPFPK	VRGQAGGKLHIIEVGT	TGNQPFPKKAVDVFFP	K	L	H	P	K	K	0	0	1	0	0	1	1	2	1	2	1	1	0	1	4	0	2	0	0	1	0	18	0	1944.0469	P49951;F1MPU0	P49951	228	245	yes	no	2;3	2.1967E-21	214.82	2	3	3	2522200000	1144800000	739660000	637730000
LHIIEVGTPPTGNQPFPKK	VRGQAGGKLHIIEVGT	GNQPFPKKAVDVFFPP	K	L	H	K	K	A	0	0	1	0	0	1	1	2	1	2	1	2	0	1	4	0	2	0	0	1	0	19	1	2072.1419	P49951;F1MPU0	P49951	228	246	yes	no	3	6.4607E-05	103.13	1	1	1	31066000	12980000	10911000	7174700
LHISQLQHENSTLK	LQQISAMRLHISQLQH	QHENSTLKGAQMKASL	R	L	H	L	K	G	0	0	1	0	0	2	1	0	2	1	3	1	0	0	0	2	1	0	0	0	0	14	0	1646.874	F1MIC9	F1MIC9	1060	1073	yes	yes	3	1.0833E-11	126.56	1	1	1	15334000	10836000	0	4498900
LHTDLWPQGSPEDIR	PCGLTEQRLHTDLWPQ	QGSPEDIRSLSLSEES	R	L	H	I	R	S	0	1	0	2	0	1	1	1	1	1	2	0	0	0	2	1	1	1	0	0	0	15	0	1762.8638	F1N3M8;G3MYP5	G3MYP5	1175	1189	no	no	2;3	2.8493E-11	173.44	1	2	2	65135000	19118000	23118000	22900000
LIDDYGVEEEPAELPEGTSLTVDNKR	EFRDALAKLIDDYGVE	SLTVDNKRFFFDVGSN	K	L	I	K	R	F	1	1	1	3	0	0	5	2	0	1	3	1	0	0	2	1	2	0	1	2	0	26	1	2888.3927	E1BMW9	E1BMW9	205	230	yes	yes	3	0.059605	28.091			1	4480400	0	0	4480400
LIDEETNIIQPSTEHTYSK	PKESEPPKLIDEETNI	STEHTYSKKEEKGQEP	K	L	I	S	K	K	0	0	1	1	0	1	3	0	1	3	1	1	0	0	1	2	3	0	1	0	0	19	0	2217.0801	F1MEW3	F1MEW3	465	483	yes	yes	2;3	7.515E-18	197.38	2	2	2	192250000	89709000	61877000	40661000
LIDVDHYAKDEVAAR	ALEKAGQKLIDVDHYA	AKDEVAARMNEVISLW	K	L	I	A	R	M	3	1	0	3	0	0	1	0	1	1	1	1	0	0	0	0	0	0	1	2	0	15	1	1713.8686	E1BFB0	E1BFB0	638	652	yes	yes	3;4	1.8675E-05	134.4	2	2	1	43591000	23063000	13151000	7377700
LIGQIVSSITASLR	PTYTNLNRLIGQIVSS	SSITASLRFDGALNVD	R	L	I	L	R	F	1	1	0	0	0	1	0	1	0	3	2	0	0	0	0	3	1	0	0	1	0	14	0	1456.8613	Q2HJ86;F2Z4C1;F6RP72;F2Z4K0;Q32KN8	Q2HJ86	230	243	yes	no	2	3.3691E-08	161.21	1	1	1	20834000	9880000	3800000	7153600
LINQPLPDLK	PATPKQLRLINQPLPD	NQPLPDLKNVKSKIGS	R	L	I	L	K	N	0	0	1	1	0	1	0	0	0	1	3	1	0	0	2	0	0	0	0	0	0	10	0	1149.6758	F1MEW3	F1MEW3	1670	1679	yes	yes	2	0.00069782	117.83	1	1	1	127850000	71593000	34501000	21758000
LIQEQHPEEELIK	EVNQFAAKLIQEQHPE	HPEEELIKTKQDEVNA	K	L	I	I	K	T	0	0	0	0	0	2	4	0	1	2	2	1	0	0	1	0	0	0	0	0	0	13	0	1604.841	E1BFB0	E1BFB0	215	227	yes	yes	2	2.4554E-06	135.14	1	1	1	20382000	9448200	5427600	5506200
LIQNNHYAMEDVATR	ALDEFATKLIQNNHYA	AMEDVATRRDALLSRR	K	L	I	T	R	R	2	1	2	1	0	1	1	0	1	1	1	0	1	0	0	0	1	0	1	1	0	15	0	1773.8468	E1BFB0	E1BFB0	533	547	yes	yes	3	0.003862	76.358	1	1	1	0	0	0	0
LIQSHPESAEDLQEK	SLGETAERLIQSHPES	SAEDLQEKCTELNQAW	R	L	I	E	K	C	1	0	0	1	0	2	3	0	1	1	2	1	0	0	1	2	0	0	0	0	0	15	0	1722.8424	E1BFB0	E1BFB0	1299	1313	yes	yes	3	3.0436E-05	112.17	1		1	13268000	9156900	0	4110700
LKDRPPEQK	EWEGKVPKLKDRPPEQ	KDRPPEQKEKGPEPTD	K	L	K	Q	K	E	0	1	0	1	0	1	1	0	0	0	1	2	0	0	2	0	0	0	0	0	0	9	2	1109.6193	G3MYP5	G3MYP5	1343	1351	yes	yes	3	0.046204	77.049	1			21864000	21864000	0	0
LKLLLPWLEAR	AEVEKRNRLKLLLPWL	LLPWLEARIHEGCEEP	R	L	K	A	R	I	1	1	0	0	0	0	1	0	0	0	5	1	0	0	1	0	0	1	0	0	0	11	1	1350.8387	P49951;F1MPU0	P49951	855	865	yes	no	2;3	0.0031927	112.94	2			14503000	14503000	0	0
LKYENEVALR	RLAADDFRLKYENEVA	YENEVALRQSVEADIN	R	L	K	L	R	Q	1	1	1	0	0	0	2	0	0	0	2	1	0	0	0	0	0	0	1	1	0	10	1	1233.6717	CON__P13645	CON__P13645	236	245	yes	yes	2;3	8.2212E-05	149.33	2	2	2	129090000	74895000	30757000	23434000
LLEAQSHFR	NSATRKKKLLEAQSHF	LEAQSHFRKVEDLFLT	K	L	L	F	R	K	1	1	0	0	0	1	1	0	1	0	2	0	0	1	0	1	0	0	0	0	0	9	0	1099.5774	E1BFB0	E1BFB0	2079	2087	yes	yes	2;3	4.1781E-05	195.17	1	1	2	16816000	8695200	3205400	4915500
LLEGEENR	IEIATYRKLLEGEENR	LLEGEENRITIPVQTF	K	L	L	N	R	I	0	1	1	0	0	0	3	1	0	0	2	0	0	0	0	0	0	0	0	0	0	8	0	958.47197	Q28115	Q28115	365	372	yes	yes	2	0.0005135	170.66	1	1	1	45375000	27122000	10624000	7629300
LLEGEETR	IEIAAYRKLLEGEETR	LLEGEETRFSTFAGSI	K	L	L	T	R	F	0	1	0	0	0	0	3	1	0	0	2	0	0	0	0	0	1	0	0	0	0	8	0	945.47673	P02548;F1MDZ2;O77788;Q08DH7	F1MDZ2	404	411	no	no	2	0.00066914	164.53	1	1	1	243950000	138960000	59199000	45789000
LLEMNLMHAPQVADAILGNQMFTHYDR	SEGPLQTRLLEMNLMH	QMFTHYDRAHIAQLCE	R	L	L	D	R	A	3	1	2	2	0	2	1	1	2	1	4	0	3	1	1	0	1	0	1	1	0	27	0	3127.5042	P49951;F1MPU0	P49951	584	610	yes	no	3;4	8.1117E-05	105.35	6	4	5	0	0	0	0
LLHEVQELTTEVEK	TPQQKYQRLLHEVQEL	ELTTEVEKIKTTVKES	R	L	L	E	K	I	0	0	0	0	0	1	4	0	1	0	3	1	0	0	0	0	2	0	0	2	0	14	0	1666.8778	Q3ZCF0	Q3ZCF0	106	119	yes	yes	2	2.0498E-12	191.78	1	1	1	49227000	27890000	12100000	9236400
LLLPWLEAR	VEKRNRLKLLLPWLEA	LLPWLEARIHEGCEEP	K	L	L	A	R	I	1	1	0	0	0	0	1	0	0	0	4	0	0	0	1	0	0	1	0	0	0	9	0	1109.6597	P49951;F1MPU0	P49951	857	865	yes	no	1;2	0.00028771	163.15	4	2	1	1470700000	809820000	366870000	294040000
LLPGADYLVSVIALK	KTQTRLLRLLPGADYL	LVSVIALKGFEESEPV	R	L	L	L	K	G	2	0	0	1	0	0	0	1	0	1	4	1	0	0	1	1	0	0	1	2	0	15	0	1570.9334	F1MRZ5;F1MRZ6	F1MRZ5	1314	1328	yes	no	2	0.01327	71.531	1	1	1	2838700	1704400	584090	550240
LLPPMRDEPTTR	ESPIPDPKLLPPMRDE	MRDEPTTRSWLADIPP	K	L	L	T	R	S	0	2	0	1	0	0	1	0	0	0	2	0	1	0	3	0	2	0	0	0	0	12	1	1424.7446	G3MYP5	G3MYP5	1832	1843	yes	yes	2;3	0.026711	72.817		1	2	0	0	0	0
LLVSSEDYGR	ESWIKEKKLLVSSEDY	VSSEDYGRDLTGVQNL	K	L	L	G	R	D	0	1	0	1	0	0	1	1	0	0	2	0	0	0	0	2	0	0	1	1	0	10	0	1137.5666	E1BFB0	E1BFB0	1785	1794	yes	yes	2	0.00011925	156.18	1		1	9887000	7701300	0	2185700
LLYNNVSNFGR	EKMYDAAKLLYNNVSN	NNVSNFGRLASTLVHL	K	L	L	G	R	L	0	1	3	0	0	0	0	1	0	0	2	0	0	1	0	1	0	0	1	1	0	11	0	1295.6622	P49951;F1MPU0	P49951	1216	1226	yes	no	2	8.6344E-18	204.5	5	4	4	241610	241610	0	0
LNHQEFK	FDKDKSGRLNHQEFKS	RLNHQEFKSCLRSLGY	R	L	N	F	K	S	0	0	1	0	0	1	1	0	1	0	1	1	0	1	0	0	0	0	0	0	0	7	0	914.46102	E1BFB0	E1BFB0	2343	2349	yes	yes	2	0.0055022	129.55		1		2444700	0	2444700	0
LPDASR	FNVPDKLRLPDASRKA	LRLPDASRKAKRSIEE	R	L	P	S	R	K	1	1	0	1	0	0	0	0	0	0	1	0	0	0	1	1	0	0	0	0	0	6	0	657.34459	F1N3M8;G3MYP5	G3MYP5	145	150	no	no	2	0.0072524	148.4	1	1	1	10055000	6583700	2194000	1276900
LQEELSQAER	VVRQQRERLQEELSQA	EELSQAERTIDELKEQ	R	L	Q	E	R	T	1	1	0	0	0	2	3	0	0	0	2	0	0	0	0	1	0	0	0	0	0	10	0	1201.5939	F1MIC9	F1MIC9	375	384	yes	yes	2	8.1729E-05	164.33	1	1	1	13301000	7299700	2886600	3114500
LQELDAASK	WREEQRKRLQELDAAS	QELDAASKVMEQEWRE	R	L	Q	S	K	V	2	0	0	1	0	1	1	0	0	0	2	1	0	0	0	1	0	0	0	0	0	9	0	973.50803	P04975;G3N252	P04975	113	121	yes	no	2	0.00049753	126.31	1	1	1	1405000000	746840000	304170000	354010000
LQIASDENYKDPTNLQGK	LEKWIQEKLQIASDEN	DPTNLQGKLQKHQAFE	K	L	Q	G	K	L	1	0	2	2	0	2	1	1	0	1	2	2	0	0	1	1	1	0	1	0	0	18	1	2033.0065	E1BFB0	E1BFB0	64	81	yes	yes	2;3	2.451E-08	153.72	1	2	2	46166000	24588000	12629000	8949200
LQQFLR	ASLGEASKLQQFLRDL	SKLQQFLRDLDDFQSW	K	L	Q	L	R	D	0	1	0	0	0	2	0	0	0	0	2	0	0	1	0	0	0	0	0	0	0	6	0	803.46537	F1MYC9	F1MYC9	1064	1069	yes	yes	2	0.011427	119.23	1	1	1	12400000	6929800	2713200	2757400
LQQLFR	QKLADSLRLQQLFRDV	LRLQQLFRDVEDEETW	R	L	Q	F	R	D	0	1	0	0	0	2	0	0	0	0	2	0	0	1	0	0	0	0	0	0	0	6	0	803.46537	E1BFB0	E1BFB0	786	791	yes	yes	2	0.0050146	152.49	1			4679900	4679900	0	0
LQSEPESIR	AAISQVDRLQSEPESI	QSEPESIRKWREEQTE	R	L	Q	I	R	K	0	1	0	0	0	1	2	0	0	1	1	0	0	0	1	2	0	0	0	0	0	9	0	1057.5404	P04973	P04973	98	106	yes	yes	2	0.00013368	179.37	1	1	1	994140000	527550000	230290000	236290000
LQSEPESIRK	AAISQVDRLQSEPESI	SEPESIRKWREEQTER	R	L	Q	R	K	W	0	1	0	0	0	1	2	0	0	1	1	1	0	0	1	2	0	0	0	0	0	10	1	1185.6354	P04973	P04973	98	107	yes	yes	2;3	8.1005E-05	169.93	2	2	2	1356000000	803500000	335470000	217020000
LQSVLGK	VLDQVEARLQSVLGKV	RLQSVLGKVNEIAKHK	R	L	Q	G	K	V	0	0	0	0	0	1	0	1	0	0	2	1	0	0	0	1	0	0	0	1	0	7	0	743.45414	Q3ZCF0	Q3ZCF0	285	291	yes	yes	2	0.0046693	140.98	1	1	1	9884000	5986000	2106900	1791100
LRDDTEAAIR	ERFEEEARLRDDTEAA	DDTEAAIRALRKDIEE	R	L	R	I	R	A	2	2	0	2	0	0	1	0	0	1	1	0	0	0	0	0	1	0	0	0	0	10	1	1158.5993	F1MDZ2;O77788	F1MDZ2	195	204	yes	no	2;3	6.8451E-06	214.64	2	2	2	407730000	245340000	94099000	68288000
LRLDQLTANSAR	QAELRELRLRLDQLTA	QLTANSARLEVERDNL	R	L	R	A	R	L	2	2	1	1	0	1	0	0	0	0	3	0	0	0	0	1	1	0	0	0	0	12	1	1356.7474	Q28115	Q28115	121	132	yes	yes	2;3	1.1127E-13	267.23	2	2	2	131490000	62782000	41120000	27584000
LRSEIDNVK	ELNRVIQRLRSEIDNV	RSEIDNVKKQISNLQQ	R	L	R	V	K	K	0	1	1	1	0	0	1	0	0	1	1	1	0	0	0	1	0	0	0	1	0	9	1	1072.5877	CON__P04264	CON__P04264	408	416	no	no	2	0.0024678	127.37	1	1	1	15045000	9078100	3227700	2739000
LRSEIDNVKK	ELNRVIQRLRSEIDNV	SEIDNVKKQISNLQQS	R	L	R	K	K	Q	0	1	1	1	0	0	1	0	0	1	1	2	0	0	0	1	0	0	0	1	0	10	2	1200.6826	CON__P04264	CON__P04264	408	417	no	no	2;3	5.717E-05	176.65	2	2	2	55260000	32100000	14108000	9051200
LSDDNTIGKEEIQQR	GVLDTGKKLSDDNTIG	GKEEIQQRLAQFVEHW	K	L	S	Q	R	L	0	1	1	2	0	2	2	1	0	2	1	1	0	0	0	1	1	0	0	0	0	15	1	1744.8592	E1BFB0	E1BFB0	1830	1844	yes	yes	2;3	1.2872E-14	236.4	2	2	2	49458000	23462000	16231000	9765500
LSFTSVGSLTTGYTQSSQVFGR	LLEGEETRLSFTSVGS	QSSQVFGRSAYGGLQT	R	L	S	G	R	S	0	1	0	0	0	2	0	3	0	0	2	0	0	2	0	5	4	0	1	2	0	22	0	2322.1492	P02548	P02548	401	422	yes	yes	2;3	4.677E-13	145.77	3	1	3	389310000	171530000	121040000	96738000
LSGGVSETVFK	INLTNDYRLSGGVSET	GVSETVFKASKIAFHW	R	L	S	F	K	A	0	0	0	0	0	0	1	2	0	0	1	1	0	1	0	2	1	0	0	2	0	11	0	1122.5921	F1MGK5	F1MGK5	112	122	yes	yes	2	0.0059926	100.93		1	1	9713700	0	5412200	4301500
LSKEDIER	TITNDKGRLSKEDIER	LSKEDIERMVQEAEKY	R	L	S	E	R	M	0	1	0	1	0	0	2	0	0	1	1	1	0	0	0	1	0	0	0	0	0	8	1	988.51892	P19120	P19120	510	517	yes	yes	2	0.00069197	133.13		1	1	6381800	0	3504000	2877900
LSKEEIER	TITNDKGRLSKEEIER	LSKEEIERMVQEAEKY	R	L	S	E	R	M	0	1	0	0	0	0	3	0	0	1	1	1	0	0	0	1	0	0	0	0	0	8	1	1002.5346	Q27975;Q27965;P0CB32	Q27975	510	517	yes	no	3	0.0028412	115.71	1	1	1	7335400	4332100	1646600	1356700
LSMKPEPLFR	FTLQYLNKLSMKPEPL	MKPEPLFRSVGNTIDP	K	L	S	F	R	S	0	1	0	0	0	0	1	0	0	0	2	1	1	1	2	1	0	0	0	0	0	10	1	1216.6638	F1N1S2	F1N1S2	391	400	yes	yes	3	0.033334	82.261	1	1	1	0	0	0	0
LSVDYGK	FTSLLMERLSVDYGKK	RLSVDYGKKSKLEFSI	R	L	S	G	K	K	0	0	0	1	0	0	0	1	0	0	1	1	0	0	0	1	0	0	1	1	0	7	0	780.40177	Q2HJ86;F2Z4C1;F6RP72;F2Z4K0;Q32KN8;Q3ZCJ7;F1MNF8	Q2HJ86	157	163	no	no	2	0.04413	82.305		1	1	6683900	0	3448500	3235500
LTEAAEQNK	WFKCRYAKLTEAAEQN	TEAAEQNKEAIRSAKE	K	L	T	N	K	E	2	0	1	0	0	1	2	0	0	0	1	1	0	0	0	0	1	0	0	0	0	9	0	1002.4982	F1MDZ2;O77788	F1MDZ2	299	307	yes	no	2	0.00048236	141.48	1	1	1	72185000	37570000	18226000	16389000
LTELEATVR	KVAELEKRLTELEATV	TELEATVRCDQDAQNP	R	L	T	V	R	C	1	1	0	0	0	0	2	0	0	0	2	0	0	0	0	0	2	0	0	1	0	9	0	1030.5659	Q3ZCF0	Q3ZCF0	233	241	yes	yes	2	0.00011747	182.98			1	1453900	0	0	1453900
LTGGANWQPK	QWNAGEKKLTGGANWQ	GGANWQPKVAPATWSA	K	L	T	P	K	V	1	0	1	0	0	1	0	2	0	0	1	1	0	0	1	0	1	1	0	0	0	10	0	1070.5509	F1MGT4	F1MGT4	739	748	yes	yes	2	0.028946	81.525	1			6338500	6338500	0	0
LTQDEEGNAQLQQR	GRFRPVLKLTQDEEGN	GNAQLQQRQLITVTMS	K	L	T	Q	R	Q	1	1	1	1	0	4	2	1	0	0	2	0	0	0	0	0	1	0	0	0	0	14	0	1628.7754	P22439	P22439	451	464	yes	yes	2	4.8098E-22	257.95		1	1	8527900	0	4135400	4392500
LTQEPESIR	AAIAQADRLTQEPESI	TQEPESIRKWREEQRK	R	L	T	I	R	K	0	1	0	0	0	1	2	0	0	1	1	0	0	0	1	1	1	0	0	0	0	9	0	1071.556	P04975;G3N252	P04975	95	103	yes	no	2	0.00029829	163.16	1	1	1	1248800000	651660000	288640000	308450000
LTQEPESIRK	AAIAQADRLTQEPESI	QEPESIRKWREEQRKR	R	L	T	R	K	W	0	1	0	0	0	1	2	0	0	1	1	1	0	0	1	1	1	0	0	0	0	10	1	1199.651	P04975;G3N252	P04975	95	104	yes	no	2;3	0.00019005	191.4	2	2	2	1532300000	931800000	362880000	237600000
LTSLVPFVDAFQLER	YQSIEFSRLTSLVPFV	VDAFQLERAIVDAARH	R	L	T	E	R	A	1	1	0	1	0	1	1	0	0	0	3	0	0	2	1	1	1	0	0	2	0	15	0	1733.9352	E1B7R4	E1B7R4	455	469	yes	yes	2	6.7787E-05	114.64	1	1	1	3843900	2025300	1355100	463500
LTTLELLEVR	ERFSALERLTTLELLE	TLELLEVRRQQEEEER	R	L	T	V	R	R	0	1	0	0	0	0	2	0	0	0	4	0	0	0	0	0	2	0	0	1	0	10	0	1185.6969	F1MYC9	F1MYC9	2078	2087	yes	yes	2	0.00037562	121.9	1			9085600	9085600	0	0
LVDTGDKFR	ACEGRRVRLVDTGDKF	VDTGDKFRFFSMVRDL	R	L	V	F	R	F	0	1	0	2	0	0	0	1	0	0	1	1	0	1	0	0	1	0	0	1	0	9	1	1049.5506	F1MYC9	F1MYC9	1906	1914	yes	yes	3	0.00213	118.5	1			4274700	4274700	0	0
LVEDEERR	ALRLFQDRLVEDEERR	LVEDEERRWTDENIDM	R	L	V	R	R	W	0	2	0	1	0	0	3	0	0	0	1	0	0	0	0	0	0	0	0	1	0	8	1	1044.52	E1BDX8	E1BDX8	2837	2844	yes	yes	2	0.0037134	171.75	1	1	1	6819500	3715400	1821000	1283100
LVLTQEQLHQLHDR	AGLGQRHRLVLTQEQL	QLHQLHDRLIS_____	R	L	V	D	R	L	0	1	0	1	0	3	1	0	2	0	4	0	0	0	0	0	1	0	0	1	0	14	0	1728.9271	F1MIC9	F1MIC9	1223	1236	yes	yes	3;4	3.0252E-08	147.73	1	2	2	39739000	20797000	9916500	9025700
LVNHFVEEFKR	GGEDFDNRLVNHFVEE	HFVEEFKRKHKKDISQ	R	L	V	K	R	K	0	1	1	0	0	0	2	0	1	0	1	1	0	2	0	0	0	0	0	2	0	11	1	1416.7514	Q27975;Q27965	Q27975	237	247	yes	no	3	3.054E-07	177.44	1	1	1	26054000	10265000	10892000	4897100
LYPATEYEISLNSVR	VTEFTITKLYPATEYE	EISLNSVRGREESERI	K	L	Y	V	R	G	1	1	1	0	0	0	2	0	0	1	2	0	0	0	1	2	1	0	2	1	0	15	0	1753.8887	E1BKN2	E1BKN2	923	937	yes	yes	2	1.6504E-10	175.15	1	1	1	52451000	31135000	10742000	10573000
LYQGAGGPGAGGFGAQGPK	VCNPIISRLYQGAGGP	GFGAQGPKGGSGSGPT	R	L	Y	P	K	G	3	0	0	0	0	2	0	8	0	0	1	1	0	1	2	0	0	0	1	0	0	19	0	1688.8271	Q27975;Q27965	Q27975	610	628	yes	no	2	4.4271E-06	123.02	1	1	1	30831000	15986000	9865700	4979500
LYSTWIGGSILASLDTFKK	RISAPQERLYSTWIGG	ASLDTFKKMWVSKKEY	R	L	Y	K	K	M	1	0	0	1	0	0	0	2	0	2	3	2	0	1	0	3	2	1	1	0	0	19	1	2099.1303	F2Z4F0	F2Z4F0	337	355	no	no	3	0.011933	63.302	1	1	1	7464200	3908400	2406800	1148900
MALDIEIAAYR	YQDLLNVKMALDIEIA	DIEIAAYRKLLEGEET	K	M	A	Y	R	K	3	1	0	1	0	0	1	0	0	2	1	0	1	0	0	0	0	0	1	0	0	11	0	1264.6486	F1MSQ6;P02548;F1MDZ2;O77788;Q08DH7	F1MDZ2	392	402	no	no	2	1.0584E-18	181.87	1	3	1	0	0	0	0
MALDIEIAAYRK	YQDLLNVKMALDIEIA	IEIAAYRKLLEGEETR	K	M	A	R	K	L	3	1	0	1	0	0	1	0	0	2	1	1	1	0	0	0	0	0	1	0	0	12	1	1392.7435	F1MSQ6;P02548;F1MDZ2;O77788;Q08DH7	F1MDZ2	392	403	no	no	2	2.0691E-07	181.68	1	1	1	0	0	0	0
MASPPPSGPPSATHTPFHQSPVEEK	SPDDSTVKMASPPPSG	HQSPVEEKSEPQDFQE	K	M	A	E	K	S	2	0	0	0	0	1	2	1	2	0	0	1	1	1	7	4	2	0	0	1	0	25	0	2612.2329	F1N3M8;G3MYP5	G3MYP5	987	1011	no	no	3;4	0.0020453	90.912	2	1	1	0	0	0	0
MEFHDQQELTPSPAEPLDKK	EGLLTASKMEFHDQQE	PAEPLDKKEKEPETES	K	M	E	K	K	E	1	0	0	2	0	2	3	0	1	0	2	2	1	1	3	1	1	0	0	0	0	20	1	2339.1104	F1MEW3	F1MEW3	159	178	yes	yes	2;3;4	4.1455E-10	162.32	3	2	3	0	0	0	0
MHEVSFQDKEKEHLTR	AKLRAQEKMHEVSFQD	KEKEHLTRLQDAEEMK	K	M	H	T	R	L	0	1	0	1	0	1	3	0	2	0	1	2	1	1	0	1	1	0	0	1	0	16	2	2012.9738	F6RAG5	F6RAG5	676	691	yes	yes	4	1.0946E-05	150.39	1			0	0	0	0
MHTTFEHDIQALGTQVR	NTVETLQRMHTTFEHD	QALGTQVRQLQEDAAR	R	M	H	V	R	Q	1	1	0	1	0	2	1	1	2	1	1	0	1	1	0	0	3	0	0	1	0	17	0	1982.9632	F1MYC9	F1MYC9	1844	1860	yes	yes	3	6.9248E-06	126.63	1	1	1	0	0	0	0
MKAHTMTDDVTFWK	FNIEMKSKMKAHTMTD	TDDVTFWKWISLNTVA	K	M	K	W	K	W	1	0	0	2	0	0	0	0	1	0	0	2	2	1	0	0	3	1	0	1	0	14	1	1709.7905	P49951;F1MPU0	P49951	99	112	yes	no	2;3	0.00031899	133.23	1	2	1	0	0	0	0
MKEIAEAYLGK	VSSMVLTKMKEIAEAY	IAEAYLGKTVTNAVVT	K	M	K	G	K	T	2	0	0	0	0	0	2	1	0	1	1	2	1	0	0	0	0	0	1	0	0	11	1	1251.6533	P19120	P19120	127	137	yes	yes	2;3	0.00084521	115.57	2	1	1	0	0	0	0
MLGYFSLVGLLR	YGRHSLYKMLGYFSLV	FSLVGLLRLHSLLGDY	K	M	L	L	R	L	0	1	0	0	0	0	0	2	0	0	4	0	1	1	0	1	0	0	1	1	0	12	0	1367.7635	Q3ZCK1	Q3ZCK1	268	279	yes	yes	2	0.00051533	95.477	1			0	0	0	0
MLTAQDMSYDEAR	LSLWINEKMLTAQDMS	DMSYDEARNLHSKWLK	K	M	L	A	R	N	2	1	0	2	0	1	1	0	0	0	1	0	2	0	0	1	1	0	1	0	0	13	0	1529.649	F1MYC9	F1MYC9	1295	1307	yes	yes	2	0.011686	70.68	1	1	1	0	0	0	0
MPLATSTDHGHNLQTVQLLIK	EILWVGERMPLATSTD	QTVQLLIKKNQTLQKE	R	M	P	I	K	K	1	0	1	1	0	2	0	1	2	1	4	1	1	0	1	1	3	0	0	1	0	21	0	2316.226	F1MYC9	F1MYC9	1505	1525	yes	yes	3	5.2747E-09	126.26	1	1	1	0	0	0	0
MPPPLPAR	GTRLSLARMPPPLPAR	MPPPLPARVDFSLAGA	R	M	P	A	R	V	1	1	0	0	0	0	0	0	0	0	1	0	1	0	4	0	0	0	0	0	0	8	0	877.48439	Q28115	Q28115	38	45	yes	yes	2	0.040447	113.1	1	1	1	0	0	0	0
MQEQQADLQR	QVQEWKSKMQEQQADL	EQQADLQRRLKEARKE	K	M	Q	Q	R	R	1	1	0	1	0	4	1	0	0	0	1	0	1	0	0	0	0	0	0	0	0	10	0	1245.5772	F1MIC9	F1MIC9	228	237	yes	yes	2	0.00029596	160.18	1	1	1	0	0	0	0
MQHNLEQQIQAR	QLDQLGMRMQHNLEQQ	LEQQIQARNTTGVTEE	R	M	Q	A	R	N	1	1	1	0	0	4	1	0	1	1	1	0	1	0	0	0	0	0	0	0	0	12	0	1494.7361	E1BFB0	E1BFB0	2304	2315	yes	yes	2	0.029703	89.44	1			0	0	0	0
MQMLEDEDDLAYAETEKK	DMISKMLKMQMLEDED	AYAETEKKARPDSSSD	K	M	Q	K	K	A	2	0	0	3	0	1	4	0	0	0	2	2	2	0	0	0	1	0	1	0	0	18	1	2157.9446	E1BDX8	E1BDX8	4346	4363	yes	yes	3	0.011775	114.03	1		1	0	0	0	0
MREHLELFWSR	YSKFKPQKMREHLELF	HLELFWSRVNIPKVLR	K	M	R	S	R	V	0	2	0	0	0	0	2	0	1	0	2	0	1	1	0	1	0	1	0	0	0	11	1	1502.7453	P49951;F1MPU0	P49951	1332	1342	yes	no	2;3	1.2238E-05	155.99	3	3	3	31085000	14744000	10040000	6300900
MSATFIGNSTAIQELFK	DIPPRGLKMSATFIGN	TAIQELFKRISEQFTA	K	M	S	F	K	R	2	0	1	0	0	1	1	1	0	2	1	1	1	2	0	2	2	0	0	0	0	17	0	1856.9342	Q3MHM5;G3X7R8;Q2HJ81;E1BJB1;Q6B856	Q3MHM5	363	379	no	no	2	1.5107E-07	149		1	1	0	0	0	0
MSSTFIGNSTAIQELFK	DIPPRGLKMSSTFIGN	TAIQELFKRISEQFTA	K	M	S	F	K	R	1	0	1	0	0	1	1	1	0	2	1	1	1	2	0	3	2	0	0	0	0	17	0	1872.9291	Q2T9S0	Q2T9S0	363	379	yes	yes	2	0.0019104	96.773		1		0	0	0	0
MTLDDFR	LLDIDNTRMTLDDFRI	RMTLDDFRIKFEMEQN	R	M	T	F	R	I	0	1	0	2	0	0	0	0	0	0	1	0	1	1	0	0	1	0	0	0	0	7	0	896.4062	CON__P35527	CON__P35527	234	240	yes	yes	2	0.014728	128.86	1	1	2	0	0	0	0
MTLVASEDYGDTLAAIQGLLK	EEAWINEKMTLVASED	AAIQGLLKKHEAFETD	K	M	T	L	K	K	3	0	0	2	0	1	1	2	0	1	4	1	1	0	0	1	2	0	1	1	0	21	0	2208.1348	E1BFB0	E1BFB0	1890	1910	yes	yes	2	0.0029496	92.932	1	1	1	0	0	0	0
MVNHFIAEFK	GGEDFDNRMVNHFIAE	NHFIAEFKRKHKKDIS	R	M	V	F	K	R	1	0	1	0	0	0	1	0	1	1	0	1	1	2	0	0	0	0	0	1	0	10	0	1234.6169	P19120	P19120	237	246	yes	yes	2;3	0.00080669	131.83	1	1	2	0	0	0	0
MVNHFIAEFKR	GGEDFDNRMVNHFIAE	HFIAEFKRKHKKDISE	R	M	V	K	R	K	1	1	1	0	0	0	1	0	1	1	0	1	1	2	0	0	0	0	0	1	0	11	1	1390.718	P19120	P19120	237	247	yes	yes	3	0.0011245	119.27	1	1	1	0	0	0	0
MVQEAEKYKAEDEK	LSKEDIERMVQEAEKY	KYKAEDEKQRDKVSSK	R	M	V	E	K	Q	2	0	0	1	0	1	4	0	0	0	0	3	1	0	0	0	0	0	1	1	0	14	2	1696.7978	P19120	P19120	518	531	yes	yes	3	0.0043032	103.76		1		0	0	0	0
MYDAAK	GDRCYDEKMYDAAKLL	EKMYDAAKLLYNNVSN	K	M	Y	A	K	L	2	0	0	1	0	0	0	0	0	0	0	1	1	0	0	0	0	0	1	0	0	6	0	697.31051	P49951;F1MPU0	P49951	1210	1215	yes	no	2	0.050167	80.377		1	1	9715700	0	5905600	3810100
NAELLR	DLNDAAARNAELLRQA	ARNAELLRQAKHEAND	R	N	A	L	R	Q	1	1	1	0	0	0	1	0	0	0	2	0	0	0	0	0	0	0	0	0	0	6	0	714.40244	Q28115	Q28115	267	272	yes	yes	2	0.010651	120.76	1	1	1	70403000	45159000	14035000	11209000
NHEEEMKDLR	EELAYLKKNHEEEMKD	EEEMKDLRNVSTGDVN	K	N	H	L	R	N	0	1	1	1	0	0	3	0	1	0	1	1	1	0	0	0	0	0	0	0	0	10	1	1299.5877	CON__P13645	CON__P13645	286	295	yes	yes	3	0.0024167	122.7	1	1	1	0	0	0	0
NHKEEMSQLTGQNSGDVNVEINVAPGK	EELMALKKNHKEEMSQ	EINVAPGKDLTKTLND	K	N	H	G	K	D	1	0	4	1	0	2	3	3	1	1	1	2	1	0	1	2	1	0	0	3	0	27	1	2894.3828	CON__P35527	CON__P35527	291	317	yes	yes	3	0.059495	50.505		1		0	0	0	0
NKDDLTLSR	EKRDLHSKNKDDLTLS	KDDLTLSRSLGLGGRS	K	N	K	S	R	S	0	1	1	2	0	0	0	0	0	0	2	1	0	0	0	1	1	0	0	0	0	9	1	1060.5513	F1MEW3	F1MEW3	679	687	yes	yes	3	0.024416	83.647	1	1	1	32549000	21497000	5340900	5711000
NKLNDLEDALQQAK	ENALKDAKNKLNDLED	EDALQQAKEDLARLLR	K	N	K	A	K	E	2	0	2	2	0	2	1	0	0	0	3	2	0	0	0	0	0	0	0	0	0	14	1	1598.8264	CON__P04264	CON__P04264	442	455	yes	yes	2	2.7012E-22	276.31	1	1	1	40214000	19639000	13269000	7305300
NKLNDLEDALQQAKEDLAR	ENALKDAKNKLNDLED	QAKEDLARLLRDYQEL	K	N	K	A	R	L	3	1	2	3	0	2	2	0	0	0	4	2	0	0	0	0	0	0	0	0	0	19	2	2183.1182	CON__P04264	CON__P04264	442	460	yes	yes	3	4.4189E-18	214.26	1	1	1	23948000	13125000	4338100	6485500
NKLNDLEEALQQAKEDLAR	EHALKDARNKLNDLEE	QAKEDLARLLRDYQEL	R	N	K	A	R	L	3	1	2	2	0	2	3	0	0	0	4	2	0	0	0	0	0	0	0	0	0	19	2	2197.1339	CON__P35908	CON__P35908	446	464	yes	yes	3	2.5477E-13	189.84	1			4870700	4870700	0	0
NKPGVYTK	WGSGCAQKNKPGVYTK	NKPGVYTKVCNYVSWI	K	N	K	T	K	V	0	0	1	0	0	0	0	1	0	0	0	2	0	0	1	0	1	0	1	1	0	8	1	905.49707	P00760;CON__P00761;CON__P07477;G3MXS2;G3N0B7;E1BQ07;E1BFR6	P00760	224	231	yes	no	2;3	0.011507	121.85	2	2	2	605740000	332300000	160340000	113100000
NKYEDEINKR	QDMVEDYRNKYEDEIN	YEDEINKRTNAENEFV	R	N	K	K	R	T	0	1	2	1	0	0	2	0	0	1	0	2	0	0	0	0	0	0	1	0	0	10	2	1307.647	CON__P04264	CON__P04264	268	277	no	no	3	1.0557E-05	208.6	1	1	1	120640000	66977000	28298000	25369000
NLDIERPTYTNLNR	AIYDICRRNLDIERPT	PTYTNLNRLIGQIVSS	R	N	L	N	R	L	0	2	3	1	0	0	1	0	0	1	2	0	0	0	1	0	2	0	1	0	0	14	1	1717.8747	Q2HJ86;F2Z4C1;F6RP72;F2Z4K0;Q32KN8;Q3ZCJ7	Q2HJ86	216	229	no	no	2;3	6.0023E-17	254.58		1	2	69272000	0	29817000	39455000
NLDLDSIIAEVK	ILSMDNSRNLDLDSII	DSIIAEVKAQYEEIAQ	R	N	L	V	K	A	1	0	1	2	0	0	1	0	0	2	2	1	0	0	0	1	0	0	0	1	0	12	0	1328.7187	CON__P35908	CON__P35908	348	359	no	no	2	0.011278	82.705		1	1	13737000	0	7460400	6276700
NLILVVR	DCSEDVIKNLILVVRG	KNLILVVRGQFSTDEL	K	N	L	V	R	G	0	1	1	0	0	0	0	0	0	1	2	0	0	0	0	0	0	0	0	2	0	7	0	825.54362	P49951;F1MPU0	P49951	831	837	yes	no	2	0.0076518	124.89	2	2	2	962680000	517030000	245760000	199890000
NLISPDLGVVFLNVPENLK	TTNSDWMKNLISPDLG	LNVPENLKNPEPNIKM	K	N	L	L	K	N	0	0	3	1	0	0	1	1	0	1	4	1	0	1	2	1	0	0	0	3	0	19	0	2080.1568	F1N1S2	F1N1S2	348	366	yes	yes	2	0.00074349	85.737	1	1	1	13765000	6610500	4507900	2646200
NLISPELGVVFFNVPDK	SSYSDWVKNLISPELG	VFFNVPDKLRLPDASR	K	N	L	D	K	L	0	0	2	1	0	0	1	1	0	1	2	1	0	2	2	1	0	0	0	3	0	17	0	1887.0142	F1N3M8;G3MYP5	G3MYP5	126	142	no	no	2	0.0013425	74.618		1		5590800	0	5590800	0
NLISPELGVVFFNVPDKLR	SSYSDWVKNLISPELG	FNVPDKLRLPDASRKA	K	N	L	L	R	L	0	1	2	1	0	0	1	1	0	1	3	1	0	2	2	1	0	0	0	3	0	19	1	2156.1994	F1N3M8;G3MYP5	G3MYP5	126	144	no	no	2;3	1.2E-08	158.58	2	2	2	78247000	46242000	15653000	16353000
NLQNLLILTAIK	NSVFSEHRNLQNLLIL	LLILTAIKADRTRVME	R	N	L	I	K	A	1	0	2	0	0	1	0	0	0	2	4	1	0	0	0	0	1	0	0	0	0	12	0	1352.8391	P49951;F1MPU0	P49951	1023	1034	yes	no	1;2	3.8349E-07	194.17	5	3	2	2241800000	1232000000	618940000	390880000
NLQNLLILTAIKADR	NSVFSEHRNLQNLLIL	LTAIKADRTRVMEYIN	R	N	L	D	R	T	2	1	2	1	0	1	0	0	0	2	4	1	0	0	0	0	1	0	0	0	0	15	1	1695.0043	P49951;F1MPU0	P49951	1023	1037	yes	no	2;3	1.0432E-16	239.75	2	2	2	67003000	27020000	19999000	19984000
NLQSAEEWYK	QYESLAAKNLQSAEEW	QSAEEWYKSKFANLNE	K	N	L	Y	K	S	1	0	1	0	0	1	2	0	0	0	1	1	0	0	0	1	0	1	1	0	0	10	0	1266.5881	Q08DH7	Q08DH7	279	288	yes	yes	2	0.0003575	121.9	1	1	1	156000000	94497000	36238000	25264000
NMNKDDEEEITK	ETWEVIFRNMNKDDEE	DDEEEITKSLRRPETT	R	N	M	T	K	S	0	0	2	2	0	0	3	0	0	1	0	2	1	0	0	0	1	0	0	0	0	12	1	1464.6402	F1MRZ5;F1MRZ6	F1MRZ5	748	759	yes	no	2	0.0004189	130.15	1	1	1	0	0	0	0
NMQDMVEDYR	SRLDSELKNMQDMVED	QDMVEDYRNKYEDEIN	K	N	M	Y	R	N	0	1	1	2	0	1	1	0	0	0	0	0	2	0	0	0	0	0	1	1	0	10	0	1299.5224	CON__P04264	CON__P04264	258	267	yes	yes	2	0.0020511	108.93	2	2	2	0	0	0	0
NMQNAEEWFK	QYEKLAAKNMQNAEEW	QNAEEWFKSRFTVLTE	K	N	M	F	K	S	1	0	2	0	0	1	2	0	0	0	0	1	1	1	0	0	0	1	0	0	0	10	0	1295.5605	P02548	P02548	273	282	yes	yes	2	0.0042259	123.96	1		2	0	0	0	0
NNLAGAEELFAR	LALRMAVRNNLAGAEE	GAEELFARKFNALFAQ	R	N	N	A	R	K	3	1	2	0	0	0	2	1	0	0	2	0	0	1	0	0	0	0	0	0	0	12	0	1303.6521	P49951;F1MPU0	P49951	355	366	yes	no	2	2.2066E-09	223.87	4	5	5	2767400000	1162400000	859080000	745920000
NNRPSEGPLQTR	AFLLDALKNNRPSEGP	SEGPLQTRLLEMNLMH	K	N	N	T	R	L	0	2	2	0	0	1	1	1	0	0	1	0	0	0	2	1	1	0	0	0	0	12	1	1367.6906	P49951;F1MPU0	P49951	572	583	yes	no	2;3	4.2898E-08	215.51	8	6	8	3862800000	2063800000	1049500000	749440000
NQALNTDNYGHDLASVQALQR	TKEWIEEKNQALNTDN	ASVQALQRKHEGFERD	K	N	Q	Q	R	K	3	1	3	2	0	3	0	1	1	0	3	0	0	0	0	1	1	0	1	1	0	21	0	2327.1254	E1BFB0	E1BFB0	1253	1273	yes	yes	2;3	1.0555E-13	162.76	2	1	1	71031000	48349000	13203000	9478500
NQILNLTTDNANILLQIDNAR	YKTIDDLKNQILNLTT	LLQIDNARLAADDFRL	K	N	Q	A	R	L	2	1	5	2	0	2	0	0	0	3	4	0	0	0	0	0	2	0	0	0	0	21	0	2366.2554	CON__P13645	CON__P13645	208	228	yes	yes	2	4.5484E-13	168.79	1			23087000	23087000	0	0
NQLTAMSSVLAK	SMPSEQIRNQLTAMSS	AMSSVLAKALEVIKPA	R	N	Q	A	K	A	2	0	1	0	0	1	0	0	0	0	2	1	1	0	0	2	1	0	0	1	0	12	0	1261.67	E1B7R4	E1B7R4	521	532	yes	yes	2	0.019053	99.5		1		0	0	0	0
NQTAEKEEFEHQQK	EIINWLDKNQTAEKEE	EEFEHQQKELEKVCNP	K	N	Q	Q	K	E	1	0	1	0	0	3	4	0	1	0	0	2	0	1	0	0	1	0	0	0	0	14	1	1744.8016	P19120	P19120	584	597	yes	yes	3	2.2971E-08	166.48			1	3554200	0	0	3554200
NQVALNPQNTVFDAK	RLIGDAAKNQVALNPQ	QNTVFDAKRLIGRKFG	K	N	Q	A	K	R	2	0	3	1	0	2	0	0	0	0	1	1	0	1	1	0	1	0	0	2	0	15	0	1657.8424	Q27975;Q27965	Q27975	57	71	yes	no	2	0.00041426	102.65	1	1	1	31069000	15284000	10478000	5306300
NQVAMNPTNTVFDAK	RLIGDAAKNQVAMNPT	TNTVFDAKRLIGRRFD	K	N	Q	A	K	R	2	0	3	1	0	1	0	0	0	0	0	1	1	1	1	0	2	0	0	2	0	15	0	1648.7879	P19120	P19120	57	71	yes	yes	2	7.5563E-08	168.5	1		1	0	0	0	0
NQVAMNPTNTVFDAKR	RLIGDAAKNQVAMNPT	NTVFDAKRLIGRRFDD	K	N	Q	K	R	L	2	1	3	1	0	1	0	0	0	0	0	1	1	1	1	0	2	0	0	2	0	16	1	1804.889	P19120	P19120	57	72	yes	yes	3	8.6933E-06	143.05			1	0	0	0	0
NSKIEISELNR	GRHGDSVRNSKIEISE	IEISELNRVIQRLRSE	R	N	S	N	R	V	0	1	2	0	0	0	2	0	0	2	1	1	0	0	0	2	0	0	0	0	0	11	1	1301.6939	CON__P04264	CON__P04264	393	403	yes	yes	2	0.0037761	109.72			1	2599600	0	0	2599600
NSLESYAFNMK	QRDKVSSKNSLESYAF	ESYAFNMKATVEDEKL	K	N	S	M	K	A	1	0	2	0	0	0	1	0	0	0	1	1	1	1	0	2	0	0	1	0	0	11	0	1302.5914	P19120	P19120	540	550	yes	yes	2	0.012938	108.9	1	1	1	0	0	0	0
NTLFNLSNFLDK	FIQYLASRNTLFNLSN	NLSNFLDKSGSHGYDM	R	N	T	D	K	S	0	0	3	1	0	0	0	0	0	0	3	1	0	2	0	1	1	0	0	0	0	12	0	1424.73	F1MGT4;F1N605	F1MGT4	57	68	yes	no	2	0.0001158	134.99	1	1	1	30990000	18479000	5071600	7439700
NTTGVTEEALK	LEQQIQARNTTGVTEE	GVTEEALKEFSMMFKH	R	N	T	L	K	E	1	0	1	0	0	0	2	1	0	0	1	1	0	0	0	0	3	0	0	1	0	11	0	1161.5877	E1BFB0	E1BFB0	2316	2326	yes	yes	2	0.022911	80.834		1		3527700	0	3527700	0
NVAQYNANHPDFPMQSEQLER	SMLHQACRNVAQYNAN	MQSEQLERYIQRYLVY	R	N	V	E	R	Y	2	1	3	1	0	3	2	0	1	0	1	0	1	1	2	1	0	0	1	1	0	21	0	2487.1237	E1BDX8	E1BDX8	2468	2488	yes	yes	3	0.0058206	61.276	1		1	0	0	0	0
NVDVEFFKR	IPNHSNSKNVDVEFFK	VDVEFFKRVRSSYYVV	K	N	V	K	R	V	0	1	1	1	0	0	1	0	0	0	0	1	0	2	0	0	0	0	0	2	0	9	1	1152.5928	F1N1S2	F1N1S2	2369	2377	yes	yes	2	0.0020396	164.68		1		1508100	0	1508100	0
NVETMNYADIER	GLVVPVIRNVETMNYA	MNYADIERTISELGEK	R	N	V	E	R	T	1	1	2	1	0	0	2	0	0	1	0	0	1	0	0	0	1	0	1	1	0	12	0	1453.6507	P11179;F1MEQ3	P11179	336	347	yes	no	2	0.00032211	121.01	1	1	1	0	0	0	0
NVQALEIELQSQLALK	SEITELRRNVQALEIE	LQSQLALKQSLEASLA	R	N	V	L	K	Q	2	0	1	0	0	3	2	0	0	1	4	1	0	0	0	1	0	0	0	1	0	16	0	1796.0044	CON__P13645	CON__P13645	371	386	yes	yes	2	5.0126E-05	114.63		1	1	9354300	0	5412000	3942300
NVQDAIADAEQR	AHVKKQCKNVQDAIAD	AIADAEQRGEHALKDA	K	N	V	Q	R	G	3	1	1	2	0	2	1	0	0	1	0	0	0	0	0	0	0	0	0	1	0	12	0	1328.6321	CON__P35908	CON__P35908	425	436	yes	yes	2	1.2818E-05	140.91	1	1		15548000	6450400	9097900	0
NVSTGDVNVEMNAAPGVDLTQLLNNMR	EEEMKDLRNVSTGDVN	TQLLNNMRSQYEQLAE	R	N	V	M	R	S	2	1	5	2	0	1	1	2	0	0	3	0	2	0	1	1	2	0	0	4	0	27	0	2871.3855	CON__P13645;CON__P02535-1	CON__P13645	296	322	yes	yes	2	0.050658	52.465	1	1		3915400	3915400	0	0
NYSPYYNTIDDLKDQIVDLTVGNNK	KGPAAIQKNYSPYYNT	DLTVGNNKTLLDIDNT	K	N	Y	N	K	T	0	0	4	4	0	1	0	1	0	2	2	2	0	0	1	1	2	0	3	2	0	25	1	2901.4032	CON__P35527	CON__P35527	200	224	yes	yes	3	0.05523	37.373		1		10354000	0	10354000	0
PISADSAIMNPASK	DPSNPIRRPISADSAI	AIMNPASKVIALKAGK	R	P	I	S	K	V	3	0	1	1	0	0	0	0	0	2	0	1	1	0	2	3	0	0	0	0	0	14	0	1400.697	P49951;F1MPU0	P49951	65	78	yes	no	2	3.1263E-10	194.13	1	1	1	0	0	0	0
PLLLNDLLMVLSPR	IQFYLEFKPLLLNDLL	LLMVLSPRLDHTRAVN	K	P	L	P	R	L	0	1	1	1	0	0	0	0	0	0	6	0	1	0	2	1	0	0	0	1	0	14	0	1592.9324	P49951;F1MPU0	P49951	1416	1429	yes	no	2	0.004056	102.65	1	1		0	0	0	0
PRVIGLLRPLK	SSAHLRVKPRVIGLLR	IGLLRPLKDITVTAGE	K	P	R	L	K	D	0	2	0	0	0	0	0	1	0	1	3	1	0	0	2	0	0	0	0	1	0	11	2	1260.8394	F1N757	F1N757	13134	13144	yes	yes	1	0.062385	0			1	2162300	0	0	2162300
PSSILPPR	EKRSSLPRPSSILPPR	PSSILPPRRGVSGDRD	R	P	S	P	R	R	0	1	0	0	0	0	0	0	0	1	1	0	0	0	3	2	0	0	0	0	0	8	0	865.50215	F1MEW3	F1MEW3	1553	1560	yes	yes	2	0.00011231	210.26	1	1	1	16029000	11263000	2500100	2266600
QALQGER	AEDATNEKQALQGERE	KQALQGEREGLEETLR	K	Q	A	E	R	E	1	1	0	0	0	2	1	1	0	0	1	0	0	0	0	0	0	0	0	0	0	7	0	800.41407	P02548	P02548	158	164	yes	yes	2	0.0027144	158.2	1	1	1	36221000	20671000	8773400	6776900
QALQGEREGLEETLR	AEDATNEKQALQGERE	EGLEETLRNLQARYEE	K	Q	A	L	R	N	1	2	0	0	0	2	4	2	0	0	3	0	0	0	0	0	1	0	0	0	0	15	1	1727.8802	P02548	P02548	158	172	yes	yes	2;3	1.2936E-38	309.87	2	1	1	103280000	70380000	19368000	13528000
QASHAQLGDAYDQEIR	EIQALRQKQASHAQLG	DAYDQEIRELRATLEM	K	Q	A	I	R	E	3	1	0	2	0	3	1	1	1	1	1	0	0	0	0	1	0	0	1	0	0	16	0	1800.8391	F1MDZ2;O77788	F1MDZ2	140	155	yes	no	2;3	1.2562E-16	214.82	2	2	2	448190000	212030000	129890000	106270000
QDEQLQK	ELDEWYARQDEQLQKT	RQDEQLQKTKANNRVA	R	Q	D	Q	K	T	0	0	0	1	0	3	1	0	0	0	1	1	0	0	0	0	0	0	0	0	0	7	0	887.43486	P04973	P04973	145	151	yes	yes	2	0.001166	178.3	1	1	1	133530000	75375000	35062000	23091000
QEADEATLAR	ENNLAAYRQEADEATL	ADEATLARLDLERKIE	R	Q	E	A	R	L	3	1	0	1	0	1	2	0	0	0	1	0	0	0	0	0	1	0	0	0	0	10	0	1102.5255	Q28115	Q28115	170	179	yes	yes	2	0.00017644	145.23	1	1	1	90201000	59866000	16864000	13471000
QEFAQHANAFHQWIQETR	QEENDKLRQEFAQHAN	HQWIQETRTYLLDGSC	R	Q	E	T	R	T	3	1	1	0	0	4	2	0	2	1	0	0	0	2	0	0	1	1	0	0	0	18	0	2240.0511	E1BFB0	E1BFB0	2208	2225	yes	yes	3	1.4238E-08	123.14	1		1	20848000	16123000	0	4725100
QEYDESGPSIVHR	FQQMWISKQEYDESGP	SGPSIVHRKCF_____	K	Q	E	H	R	K	0	1	0	1	0	1	2	1	1	1	0	0	0	0	1	2	0	0	1	1	0	13	0	1515.6954	P63258;P60712;F1MRD0	P63258	360	372	yes	no	3	5.9723E-10	193.28	1	1	1	20464000	9736400	5880200	4847700
QEYEQLIAK	TKTLNDMRQEYEQLIA	EYEQLIAKNRKDIENQ	R	Q	E	A	K	N	1	0	0	0	0	2	2	0	0	1	1	1	0	0	0	0	0	0	1	0	0	9	0	1120.5764	CON__P35527	CON__P35527	328	336	yes	yes	2	1.0684E-06	208.11	1	1	1	34828000	21424000	8210100	5194000
QFQDAGHFDAENIKK	DGITIQARQFQDAGHF	FDAENIKKKQEALVAR	R	Q	F	K	K	K	2	0	1	2	0	2	1	1	1	1	0	2	0	2	0	0	0	0	0	0	0	15	1	1746.8325	E1BFB0	E1BFB0	743	757	yes	yes	4	0.011409	50.806	1		1	11367000	9321700	0	2045300
QGVDADINGLR	FEMEQNLRQGVDADIN	DADINGLRQVLDNLTM	R	Q	G	L	R	Q	1	1	1	2	0	1	0	2	0	1	1	0	0	0	0	0	0	0	0	1	0	11	0	1156.5836	CON__P35527	CON__P35527	251	261	yes	yes	2	0.00075922	148.19	1	1	1	0	0	0	0
QILELEER	GANESLERQILELEER	QILELEERHSAEVASY	R	Q	I	E	R	H	0	1	0	0	0	1	3	0	0	1	2	0	0	0	0	0	0	0	0	0	0	8	0	1028.5502	Q08DH7	Q08DH7	339	346	yes	yes	2	0.00061516	164.77	1	1	1	173850000	95054000	43356000	35436000
QKLQDETNQR	AQDLGTLRQKLQDETN	LQDETNQRLEAENNLA	R	Q	K	Q	R	L	0	1	1	1	0	3	1	0	0	0	1	1	0	0	0	0	1	0	0	0	0	10	1	1258.6266	Q28115	Q28115	149	158	yes	yes	2;3	1.2997E-05	204.28	2	1	1	64137000	42581000	12669000	8886900
QLFHPEQLITGK	EVRTGTYRQLFHPEQL	PEQLITGKEDAANNYA	R	Q	L	G	K	E	0	0	0	0	0	2	1	1	1	1	2	1	0	1	1	0	1	0	0	0	0	12	0	1409.7667	Q2HJ86;F2Z4C1;F6RP72;F2Z4K0;Q32KN8	Q2HJ86	85	96	no	no	2	4.649E-09	205.8	1	1	1	26834000	14377000	6587400	5870100
QLFHPEQLITGKEDAANNYAR	EVRTGTYRQLFHPEQL	DAANNYARGHYTIGKE	R	Q	L	A	R	G	3	1	2	1	0	2	2	1	1	1	2	1	0	1	1	0	1	0	1	0	0	21	1	2414.1979	Q2HJ86;F2Z4C1;F6RP72;F2Z4K0;Q32KN8	Q2HJ86	85	105	no	no	3;4	1.6397E-13	173.21	2	2	1	79822000	54824000	17767000	7231200
QLPLVKPYLR	VNYFSKVKQLPLVKPY	PLVKPYLRSVQNHNNK	K	Q	L	L	R	S	0	1	0	0	0	1	0	0	0	0	3	1	0	0	2	0	0	0	1	1	0	10	1	1225.7547	P49951;F1MPU0	P49951	1444	1453	yes	no	2;3	0.00016798	141.48	2	2	2	1772400000	878460000	467030000	426870000
QLQELEDK	GMNEALEKQLQELEDK	QLQELEDKQNADISAM	K	Q	L	D	K	Q	0	0	0	1	0	2	2	0	0	0	2	1	0	0	0	0	0	0	0	0	0	8	0	1001.5029	P02548	P02548	333	340	yes	yes	2	0.00091322	153.08	1	1	1	67188000	36527000	18872000	11789000
QLQELEDKQNADISAMQDTINK	GMNEALEKQLQELEDK	AMQDTINKLENELRTT	K	Q	L	N	K	L	2	0	2	3	0	4	2	0	0	2	2	2	1	0	0	1	1	0	0	0	0	22	1	2531.2173	P02548	P02548	333	354	yes	yes	3	0.040779	47.155		1	1	0	0	0	0
QLQELEDKQNADISAMQDTINKLENELR	GMNEALEKQLQELEDK	NKLENELRTTKSEMAR	K	Q	L	L	R	T	2	1	3	3	0	4	4	0	0	2	4	2	1	0	0	1	1	0	0	0	0	28	2	3285.6147	P02548	P02548	333	360	yes	yes	3;4	5.7638E-08	159.46		2	2	11520000	0	4884800	6635600
QLQSISQAAASGGAK	SDFSERVKQLQSISQA	AAASGGAKELKNIHVC	K	Q	L	A	K	E	4	0	0	0	0	3	0	2	0	1	1	1	0	0	0	3	0	0	0	0	0	15	0	1415.7369	E1BDX8	E1BDX8	4488	4502	yes	yes	2	7.6532E-08	153.14	1	1	1	12499000	5903100	3891000	2705200
QLSPESLGTLQFGELSLGKEEK	TSLDISSKQLSPESLG	LSLGKEEKGPLIQAED	K	Q	L	E	K	G	0	0	0	0	0	2	4	3	0	0	5	2	0	1	1	3	1	0	0	0	0	22	1	2389.2377	F1N3M8;G3MYP5	G3MYP5	1210	1231	no	no	3	0.029077	61.345		1	1	34746000	0	14924000	19823000
QLWGLLIEETEKR	RQRLADLKQLWGLLIE	LIEETEKRHRRLEEAH	K	Q	L	K	R	H	0	1	0	0	0	1	3	1	0	1	3	1	0	0	0	0	1	1	0	0	0	13	1	1613.8777	F1MYC9	F1MYC9	1571	1583	yes	yes	3	0.00035774	109.96	1			3114400	3114400	0	0
QNADISAMQDTINKLENELR	QLQELEDKQNADISAM	NKLENELRTTKSEMAR	K	Q	N	L	R	T	2	1	3	2	0	2	2	0	0	2	2	1	1	0	0	1	1	0	0	0	0	20	1	2302.1223	P02548	P02548	341	360	yes	yes	2;3	2.3481E-09	171.98	3	2	2	13724000	13724000	0	0
QNLDGLLNQLK	SVQPRKLRQNLDGLLN	DGLLNQLKNFPARLRQ	R	Q	N	L	K	N	0	0	2	1	0	2	0	1	0	0	4	1	0	0	0	0	0	0	0	0	0	11	0	1254.6932	E1BDX8	E1BDX8	1360	1370	yes	yes	2	1.4527E-06	173.64	1			5871200	5871200	0	0
QPSIAISSK	TGPLYTHRQPSIAISS	PSIAISSKIQKTKVEA	R	Q	P	S	K	I	1	0	0	0	0	1	0	0	0	2	0	1	0	0	1	3	0	0	0	0	0	9	0	929.5182	F1MDZ2;O77788	F1MDZ2	428	436	yes	no	2	0.050701	74.841	1		1	27288000	18076000	0	9212100
QQQPPPETFDFK	QQEASVERQQQPPPET	PPETFDFKIKFAETKA	R	Q	Q	F	K	I	0	0	0	1	0	3	1	0	0	0	0	1	0	2	3	0	1	0	0	0	0	12	0	1460.6936	F1MIC9	F1MIC9	508	519	yes	yes	2	0.0002148	115.33			1	3135300	0	0	3135300
QQVAPMDDETGK	REQAQSCRQQVAPMDD	PMDDETGKELVLALYD	R	Q	Q	G	K	E	1	0	0	2	0	2	1	1	0	0	0	1	1	0	1	0	1	0	0	1	0	12	0	1317.5871	E1BFB0	E1BFB0	958	969	yes	yes	2	0.040442	89.189			1	0	0	0	0
QREEAEAATR	QRLDDEARQREEAEAA	EEAEAATRALARFAQE	R	Q	R	T	R	A	3	2	0	0	0	1	3	0	0	0	0	0	0	0	0	0	1	0	0	0	0	10	1	1159.5582	F1MSQ6	F1MSQ6	187	196	yes	yes	2;3	3.3788E-11	252.69	2	1	2	79199000	52532000	10644000	16023000
QRLDDEAR	LEDIAHVRQRLDDEAR	QRLDDEARQREEAEAA	R	Q	R	A	R	Q	1	2	0	2	0	1	1	0	0	0	1	0	0	0	0	0	0	0	0	0	0	8	1	1001.489	F1MSQ6	F1MSQ6	179	186	yes	yes	2;3	6.7133E-14	231.81	2	2	2	31370000	21531000	7222100	2616600
QRSELEDR	STKDSLERQRSELEDR	QRSELEDRHQADIASY	R	Q	R	D	R	H	0	2	0	1	0	1	2	0	0	0	1	0	0	0	0	1	0	0	0	0	0	8	1	1031.4996	F1MSQ6	F1MSQ6	339	346	yes	yes	2;3	0.00010183	220.39	1	1		10742000	8438000	2304100	0
QSALISWQPPRAEIENYILTYK	LTASEVTRQSALISWQ	ENYILTYKSTDGSRKE	R	Q	S	Y	K	S	2	1	1	0	0	2	2	0	0	3	2	1	0	0	2	2	1	1	2	0	0	22	1	2619.3697	E1BKN2	E1BKN2	1055	1076	yes	yes	3	0.00078917	77.959	1		1	7913400	5142000	0	2771400
QSLEASLAETEGR	LQSQLALKQSLEASLA	SLAETEGRYCVQLSQI	K	Q	S	G	R	Y	2	1	0	0	0	1	3	1	0	0	2	0	0	0	0	2	1	0	0	0	0	13	0	1389.6736	CON__P13645;P06394;A6QNZ7;CON__P02535-1	CON__P13645	387	399	yes	no	2	2.2453E-09	200.82	1	1	1	29857000	16956000	6664300	6237300
QSLLSQSHAHQQFLR	LHKMWENRQSLLSQSH	HAHQQFLRDTKQAEAF	R	Q	S	L	R	D	1	1	0	0	0	4	0	0	2	0	3	0	0	1	0	3	0	0	0	0	0	15	0	1778.9176	F1MYC9	F1MYC9	1162	1176	yes	yes	3	3.2358E-09	157.2	1	1	1	21246000	12533000	4618000	4095000
QSVEADINGLR	YENEVALRQSVEADIN	EADINGLRRVLDELTL	R	Q	S	L	R	R	1	1	1	1	0	1	1	1	0	1	1	0	0	0	0	1	0	0	0	1	0	11	0	1200.6099	CON__P13645;P06394;A6QNZ7;CON__P02535-1;CON__P08730-1;Q17QL7;CON__ENSEMBL:ENSP00000377550;CON__P13646-1;CON__Q7Z3Y8;CON__Q2M2I5	CON__P13645	246	256	yes	no	2	2.8687E-06	164.65	2	1	1	11919000	4654900	4294300	2969800
QSVEADINGLRR	YENEVALRQSVEADIN	ADINGLRRVLDELTLT	R	Q	S	R	R	V	1	2	1	1	0	1	1	1	0	1	1	0	0	0	0	1	0	0	0	1	0	12	1	1356.711	CON__P13645;P06394;A6QNZ7;CON__P02535-1;CON__P08730-1;Q17QL7;CON__ENSEMBL:ENSP00000377550;CON__P13646-1;CON__Q7Z3Y8	CON__P13645	246	257	yes	no	2;3	8.1603E-21	303.79	2	3	3	24190000	10769000	6805100	6615200
QTEPVEAYVIQK	IEDEEKLKQTEPVEAY	VEAYVIQKETEVIKGP	K	Q	T	Q	K	E	1	0	0	0	0	2	2	0	0	1	0	1	0	0	1	0	1	0	1	2	0	12	0	1403.7296	F1N1S2	F1N1S2	866	877	yes	yes	2	0.00019522	111.94	1	1	1	37490000	20807000	9120700	7562100
QTPLSR	RSVLMSLKQTPLSR__	LKQTPLSR________	K	Q	T	S	R	-	0	1	0	0	0	1	0	0	0	0	1	0	0	0	1	1	1	0	0	0	0	6	0	700.38679	P04975;G3N252	P04975	223	228	yes	no	2	0.0026207	109.11	1	2	1	0	0	0	0
QVLDNLTMEK	DADINGLRQVLDNLTM	LDNLTMEKSDLEMQYE	R	Q	V	E	K	S	0	0	1	1	0	1	1	0	0	0	2	1	1	0	0	0	1	0	0	1	0	10	0	1189.6013	CON__P35527	CON__P35527	262	271	yes	yes	2	0.0078524	121.36	1	1	1	0	0	0	0
QWELLLEK	TRLMELHRQWELLLEK	QWELLLEKMREKGIKL	R	Q	W	E	K	M	0	0	0	0	0	1	2	0	0	0	3	1	0	0	0	0	0	1	0	0	0	8	0	1057.5808	E1BFB0	E1BFB0	130	137	yes	yes	2	0.0072172	101.65	1	1		5894300	4171500	1722800	0
RDLATDLSLIEVK	EGTDDKARRDLATDLS	DLSLIEVKLAAAGRVK	R	R	D	V	K	L	1	1	0	2	0	0	1	0	0	1	3	1	0	0	0	1	1	0	0	1	0	13	1	1471.8246	F1MEW3	F1MEW3	909	921	yes	yes	2	1.0643E-07	203.32	1	1	1	16424000	7646400	4297200	4480100
REEFVQWVELLPDTQTPSWLGLPNNAEK	IQMPDGIRREEFVQWV	GLPNNAEKVLLTTQGV	R	R	E	E	K	V	1	1	2	1	0	2	4	1	0	0	4	1	0	1	3	1	2	2	0	2	0	28	1	3295.6513	E1BDX8	E1BDX8	4302	4329	yes	yes	3	0.005847	70.718	1	1	1	6910200	4414000	1389900	1106300
REEVAEEGAK	TPVGKLAKREEVAEEG	EVAEEGAKEARSELAK	K	R	E	A	K	E	2	1	0	0	0	0	4	1	0	0	0	1	0	0	0	0	0	0	0	1	0	10	1	1116.5411	F1N3M8;G3MYP5	G3MYP5	337	346	no	no	2	3.9473E-07	248.98	1	1	1	89312000	47970000	23941000	17401000
RFDDAVVQSDMK	DAKRLIGRRFDDAVVQ	AVVQSDMKHWPFMVVN	R	R	F	M	K	H	1	1	0	3	0	1	0	0	0	0	0	1	1	1	0	1	0	0	0	2	0	12	1	1409.6609	P19120	P19120	77	88	yes	yes	2;3	4.7624E-05	142.39	1	2	2	0	0	0	0
RGLDDDRGPR	MDDDRGPRRGLDDDRG	LDDDRGPRRGLDDDRG	R	R	G	P	R	R	0	3	0	3	0	0	0	2	0	0	1	0	0	0	1	0	0	0	0	0	0	10	2	1155.5745	E1B7R4	E1B7R4	1080	1089	yes	yes	3	0.0014156	127.93	1			9491600	9491600	0	0
RGVSGDRDENSFSLNSSISSAR	PSSILPPRRGVSGDRD	NSSISSARRTTRSEPI	R	R	G	A	R	R	1	3	2	2	0	0	1	2	0	1	1	0	0	1	0	7	0	0	0	1	0	22	2	2340.1054	F1MEW3	F1MEW3	1561	1582	yes	yes	3	3.339E-19	226.99	1	1	1	53541000	17388000	17928000	18225000
RHHQEEVGELLGQIQSSSAAQTQAEAR	QEECGYLRRHHQEEVG	AQTQAEARDALKCDVT	R	R	H	A	R	D	4	2	0	0	0	5	4	2	2	1	2	0	0	0	0	3	1	0	0	1	0	27	1	2959.4496	F1MSQ6	F1MSQ6	228	254	yes	yes	3;4	5.6006E-08	124.97	1	2	1	62873000	22164000	27374000	13335000
RIAAYLFK	KHELIEFRRIAAYLFK	RIAAYLFKGNNRWKQS	R	R	I	F	K	G	2	1	0	0	0	0	0	0	0	1	1	1	0	1	0	0	0	0	1	0	0	8	1	980.58074	P49951;F1MPU0	P49951	1509	1516	yes	no	2;3	0.019729	125.5	2	2	1	974940000	512810000	237210000	224910000
RIDSLMDEIAFLK	LARAELEKRIDSLMDE	MDEIAFLKKVHEEEIA	K	R	I	L	K	K	1	1	0	2	0	0	1	0	0	2	2	1	1	1	0	1	0	0	0	0	0	13	1	1549.8174	P02548	P02548	212	224	yes	yes	2;3	0.00086526	110.14	2	1	2	0	0	0	0
RIDSLMDEIAFLKK	LARAELEKRIDSLMDE	DEIAFLKKVHEEEIAE	K	R	I	K	K	V	1	1	0	2	0	0	1	0	0	2	2	2	1	1	0	1	0	0	0	0	0	14	2	1677.9124	P02548	P02548	212	225	yes	yes	3	0.044832	79.652	1	1	1	0	0	0	0
RKDPELWGSVLLESNPYR	SLSRYLVRRKDPELWG	LLESNPYRRPLIDQVV	R	R	K	Y	R	R	0	2	1	1	0	0	2	1	0	0	3	1	0	0	2	2	0	1	1	1	0	18	2	2158.1171	P49951	P49951	950	967	yes	yes	2;3;4	8.5363E-18	220.34	6	5	5	4319200000	2148300000	1178300000	992530000
RLEAELAAHEPAIQGVLDTGK	QNLRKKHKRLEAELAA	QGVLDTGKKLSDDNTI	K	R	L	G	K	K	4	1	0	1	0	1	3	2	1	1	3	1	0	0	1	0	1	0	0	1	0	21	1	2217.1753	E1BFB0	E1BFB0	1808	1828	yes	yes	3	0.00015096	98.3		1		4076500	0	4076500	0
RLGPGTR	SEMVVGGRRLGPGTRL	RRLGPGTRLSLARMPP	R	R	L	T	R	L	0	2	0	0	0	0	0	2	0	0	1	0	0	0	1	0	1	0	0	0	0	7	1	755.44022	Q28115	Q28115	26	32	yes	yes	2	0.038145	130.04	1	1		14232000	8935800	5296000	0
RLQELDAASK	KWREEQRKRLQELDAA	QELDAASKVMEQEWRE	K	R	L	S	K	V	2	1	0	1	0	1	1	0	0	0	2	1	0	0	0	1	0	0	0	0	0	10	1	1129.6091	P04975;G3N252	P04975	112	121	yes	no	2	9.9326E-05	202.68	1	1	1	351480000	194900000	87092000	69490000
RNEVLDR	AKGDISSRRNEVLDRW	RRNEVLDRWRRLKAQM	R	R	N	D	R	W	0	2	1	1	0	0	1	0	0	0	1	0	0	0	0	0	0	0	0	1	0	7	1	900.47773	E1BFB0	E1BFB0	1526	1532	yes	yes	2	0.007823	184.49	1	1	1	21700000	12444000	5825800	3429900
RNIVVK	SVSEGHLKRNIVVKTV	LKRNIVVKTVEMRDGE	K	R	N	V	K	T	0	1	1	0	0	0	0	0	0	1	0	1	0	0	0	0	0	0	0	2	0	6	1	727.47046	Q28115	Q28115	402	407	yes	yes	2	0.059554	46.766	1		1	0	0	0	0
RPISADSAIMNPASK	NDPSNPIRRPISADSA	AIMNPASKVIALKAGK	R	R	P	S	K	V	3	1	1	1	0	0	0	0	0	2	0	1	1	0	2	3	0	0	0	0	0	15	1	1556.7981	P49951;F1MPU0	P49951	64	78	yes	no	2;3	1.0651E-15	231.41	6	5	6	93121000	61493000	20370000	11257000
RPLIDQVVQTALSETQDPEEVSVTVK	LLESNPYRRPLIDQVV	EEVSVTVKAFMTADLP	R	R	P	V	K	A	1	1	0	2	0	3	3	0	0	1	2	1	0	0	2	2	3	0	0	5	0	26	1	2880.508	P49951	P49951	968	993	yes	yes	2	0.001133	106.88	1	1	1	1933000000	822570000	661410000	449020000
RPSPHAEEELEVEEAAEAQAEPK	LEQPEVERRPSPHAEE	AEAQAEPKDGSPEAPA	R	R	P	P	K	D	5	1	0	0	0	1	8	0	1	0	1	1	0	0	3	1	0	0	0	1	0	23	1	2545.1932	F1MEW3	F1MEW3	1332	1354	yes	yes	2;3;4	9E-06	120.33	3	3	3	317690000	164190000	86420000	67079000
RQDLEDSLQAQQYFADANEAESWMR	LKSKASQRRQDLEDSL	NEAESWMREKEPIVGS	R	R	Q	M	R	E	4	2	1	3	0	4	3	0	0	0	2	0	1	1	0	2	0	1	1	0	0	25	1	3000.3308	E1BFB0	E1BFB0	883	907	yes	yes	3	0.027349	65.428		1	1	0	0	0	0
RQQVLDR	TAEDIQERRQQVLDRY	RRQQVLDRYHRFKELS	R	R	Q	D	R	Y	0	2	0	1	0	2	0	0	0	0	1	0	0	0	0	0	0	0	0	1	0	7	1	913.50936	E1BFB0	E1BFB0	19	25	yes	yes	2	0.008375	198.07	1	1	1	4825700	2595200	1338700	891790
RSELEEQQMHLNVGLR	YANLFHEKRSELEEQQ	MHLNVGLRKIKETVDQ	K	R	S	L	R	K	0	2	1	0	0	2	3	1	1	0	3	0	1	0	0	1	0	0	0	1	0	16	1	1937.9741	E1BDX8	E1BDX8	3191	3206	yes	yes	3	0.00013131	111.81	1	1	1	0	0	0	0
RSPASDGLDLSQAAAR	LGLGLAYRRSPASDGL	DLSQAAARTNEYKIIR	R	R	S	A	R	T	4	2	0	2	0	1	0	1	0	0	2	0	0	0	1	3	0	0	0	0	0	16	1	1613.8121	Q08DH7	Q08DH7	68	83	yes	yes	2;3	5.9956E-23	277.34	3	2	1	141130000	97486000	31565000	12081000
RSYVSSSEMVVGGR	RRVTSATRRSYVSSSE	SEMVVGGRRLGPGTRL	R	R	S	G	R	R	0	2	0	0	0	0	1	2	0	0	0	0	1	0	0	4	0	0	1	3	0	14	1	1512.7355	Q28115	Q28115	12	25	yes	yes	2	0.060322	44.44	1			0	0	0	0
RTPVIDADKPVSSQLR	SNSLAFIKRTPVIDAD	KPVSSQLRVLTLSEDS	K	R	T	L	R	V	1	2	0	2	0	1	0	0	0	1	1	1	0	0	2	2	1	0	0	2	0	16	2	1780.9795	E1BDX8	E1BDX8	120	135	yes	yes	3	0.00018144	127.83	1	1	1	11861000	7090100	2918400	1852900
RVEAAQETVADYQQTIKK	AQVRDAQKRVEAAQET	DYQQTIKKYRQLTAHL	K	R	V	K	K	Y	3	1	0	1	0	3	2	0	0	1	0	2	0	0	0	0	2	0	1	2	0	18	2	2077.0804	F1MIC9	F1MIC9	465	482	yes	yes	3	0.00013384	112.74	1	1		14133000	10181000	3951800	0
RVLDELTLTK	EADINGLRRVLDELTL	LDELTLTKADLEMQIE	R	R	V	T	K	A	0	1	0	1	0	0	1	0	0	0	3	1	0	0	0	0	2	0	0	1	0	10	1	1186.6921	CON__P13645;P06394;A6QNZ7;Q17QL7	CON__P13645	257	266	yes	no	2	0.00023634	186.81	1	1	1	25048000	16331000	4805200	3912100
RYVETPR	YYSTSYKRRYVETPRV	RRYVETPRVHISSVRS	R	R	Y	P	R	V	0	2	0	0	0	0	1	0	0	0	0	0	0	0	1	0	1	0	1	1	0	7	1	919.48756	P02548	P02548	17	23	yes	yes	2	0.0019653	208.22	1	1	1	102510000	59074000	27030000	16401000
SAAGSSSGFHSWAR	KGGAGGARSAAGSSSG	SGFHSWARTSVSSVSA	R	S	A	A	R	T	3	1	0	0	0	0	0	2	1	0	0	0	0	1	0	5	0	1	0	0	0	14	0	1406.6327	F1MSQ6	F1MSQ6	38	51	yes	yes	2;3	3.3046E-22	267.86	2	2	2	147620000	80162000	39737000	27724000
SAASLNSR	DIMLIKLKSAASLNSR	SAASLNSRVASISLPT	K	S	A	S	R	V	2	1	1	0	0	0	0	0	0	0	1	0	0	0	0	3	0	0	0	0	0	8	0	804.40898	P00760	P00760	115	122	yes	yes	2	1.5627E-08	196.95	3	2	3	199460000	136210000	63246000	0
SADESGQALLAAGHYASDEVR	DAHEDSFKSADESGQA	HYASDEVREKLTVLSE	K	S	A	V	R	E	5	1	0	2	0	1	2	2	1	0	2	0	0	0	0	3	0	0	1	1	0	21	0	2145.9927	E1BFB0	E1BFB0	419	439	yes	yes	3	6.4996E-06	100.28	1	1	1	38820000	21365000	8466500	8988200
SAILVPSEK	PHTPGTPKSAILVPSE	AILVPSEKKVAIIRTP	K	S	A	E	K	K	1	0	0	0	0	0	1	0	0	1	1	1	0	0	1	2	0	0	0	1	0	9	0	942.5386	F1MEW3	F1MEW3	1642	1650	yes	yes	2	0.061456	60.064			1	5896100	0	0	5896100
SAILVPSEKK	PHTPGTPKSAILVPSE	ILVPSEKKVAIIRTPP	K	S	A	K	K	V	1	0	0	0	0	0	1	0	0	1	1	2	0	0	1	2	0	0	0	1	0	10	1	1070.6336	F1MEW3	F1MEW3	1642	1651	yes	yes	3	0.056545	45.433			1	2439000	0	0	2439000
SAKEEIAEYR	EQNKEAIRSAKEEIAE	KEEIAEYRRQLQSKSI	R	S	A	Y	R	R	2	1	0	0	0	0	3	0	0	1	0	1	0	0	0	1	0	0	1	0	0	10	1	1194.5881	F1MDZ2;O77788	F1MDZ2	312	321	yes	no	2;3	3.401E-05	187.31	2	2	2	292840000	154860000	64142000	73840000
SAKEEIAEYRR	EQNKEAIRSAKEEIAE	EEIAEYRRQLQSKSIE	R	S	A	R	R	Q	2	2	0	0	0	0	3	0	0	1	0	1	0	0	0	1	0	0	1	0	0	11	2	1350.6892	F1MDZ2;O77788	F1MDZ2	312	322	yes	no	2;3	1.7323E-05	191.23	2	2	2	125530000	78817000	23500000	23212000
SALAPR	TVSSSYKRSALAPRLT	KRSALAPRLTYSSAML	R	S	A	P	R	L	2	1	0	0	0	0	0	0	0	0	1	0	0	0	1	1	0	0	0	0	0	6	0	613.35476	F1MDZ2;O77788	F1MDZ2	55	60	yes	no	2	0.04284	86.344			1	6497700	0	0	6497700
SANGFPYREDEEGAFGEHGSQGTYSNTK	GAGEGLVRSANGFPYR	QGTYSNTKENGINGEL	R	S	A	T	K	E	2	1	2	1	0	1	4	5	1	0	0	1	0	2	1	3	2	0	2	0	0	28	1	3034.2965	F1MEW3	F1MEW3	44	71	yes	yes	3	0.0067641	101.73	1	1	1	0	0	0	0
SAQEEISEYR	KVNTDAMRSAQEEISE	QEEISEYRRQLQARTT	R	S	A	Y	R	R	1	1	0	0	0	1	3	0	0	1	0	0	0	0	0	2	0	0	1	0	0	10	0	1210.5466	F1MSQ6	F1MSQ6	307	316	yes	yes	2	3.6061E-05	180.07	1	1	1	62186000	31824000	18121000	12241000
SAQEEISEYRR	KVNTDAMRSAQEEISE	EEISEYRRQLQARTTE	R	S	A	R	R	Q	1	2	0	0	0	1	3	0	0	1	0	0	0	0	0	2	0	0	1	0	0	11	1	1366.6477	F1MSQ6	F1MSQ6	307	317	yes	yes	2;3	7.7644E-06	181.66	2	2	2	130920000	62668000	40933000	27314000
SAVEDEGLK	ESYAFNMKSAVEDEGL	AVEDEGLKGKISEADK	K	S	A	L	K	G	1	0	0	1	0	0	2	1	0	0	1	1	0	0	0	1	0	0	0	1	0	9	0	946.46074	Q27975;Q27965	Q27975	551	559	yes	no	2	0.024084	88.495	1	1	1	10165000	6763600	1722600	1678800
SAYGGLQTSSYLMSAR	QSSQVFGRSAYGGLQT	SSYLMSARSFPSYYTS	R	S	A	A	R	S	2	1	0	0	0	1	0	2	0	0	2	0	1	0	0	4	1	0	2	0	0	16	0	1690.7985	P02548	P02548	423	438	yes	yes	2	5.3293E-06	131.56	1	1	2	3016200	0	0	3016200
SAYSSYSAPVSSSLSVR	RSGYSTARSAYSSYSA	VSSSLSVRRSYSSSSG	R	S	A	V	R	R	2	1	0	0	0	0	0	0	0	0	1	0	0	0	1	8	0	0	2	2	0	17	0	1746.8424	P02548	P02548	38	54	yes	yes	2	2.0062E-08	153.72	2	2	2	486660000	297750000	92920000	95992000
SDISPLTPR	DAEKLSPKSDISPLTP	DISPLTPRESSPLYSP	K	S	D	P	R	E	0	1	0	1	0	0	0	0	0	1	1	0	0	0	2	2	1	0	0	0	0	9	0	984.52401	F1N1S2	F1N1S2	1777	1785	yes	yes	2	0.00025343	169.09	1	1	1	15485000	9665100	3274200	2545800
SDLEMQYETLQEELMALKK	LDNLTMEKSDLEMQYE	EELMALKKNHKEEMSQ	K	S	D	K	K	N	1	0	0	1	0	2	4	0	0	0	4	2	2	0	0	1	1	0	1	0	0	19	1	2298.1123	CON__P35527	CON__P35527	272	290	yes	yes	3	0.00025418	140.89			1	0	0	0	0
SDTLQITDLGAPGVR	EYDKLLFRSDTLQITD	DLGAPGVREEFVETCP	R	S	D	V	R	E	1	1	0	2	0	1	0	2	0	1	2	0	0	0	1	1	2	0	0	1	0	15	0	1541.8049	F1MEW3	F1MEW3	1262	1276	yes	yes	2	3.2066E-10	169.04	1	1	1	35918000	0	17160000	18758000
SDVLETVVLINPSDEAVSTEVR	GQKILHHRSDVLETVV	EAVSTEVRLMITDAAR	R	S	D	V	R	L	1	1	1	2	0	0	3	0	0	1	2	0	0	0	1	3	2	0	0	5	0	22	0	2371.2118	F1N1S2	F1N1S2	104	125	yes	yes	2	0.053546	52.451			1	9440700	0	0	9440700
SEITELRR	IEQISSYKSEITELRR	SEITELRRNVQALEIE	K	S	E	R	R	N	0	2	0	0	0	0	2	0	0	1	1	0	0	0	0	1	1	0	0	0	0	8	1	1002.5458	CON__P13645;P06394;A6QNZ7;CON__P02535-1	CON__P13645	363	370	yes	no	2;3	0.0023289	183.65	2	2	2	22223000	11643000	5057200	5523000
SEKEQLQVLNDR	EGCVVVARSEKEQLQV	QLQVLNDRFAGYIDKV	R	S	E	D	R	F	0	1	1	1	0	2	2	0	0	0	2	1	0	0	0	1	0	0	0	1	0	12	1	1457.7474	F1MSQ6	F1MSQ6	92	103	yes	yes	2;3	1.1105E-18	272.54	2	2	2	232380000	147650000	52820000	31909000
SEPQDFQEADSWGDTK	HQSPVEEKSEPQDFQE	ADSWGDTKSIPGVGKE	K	S	E	T	K	S	1	0	0	3	0	2	2	1	0	0	0	1	0	1	1	2	1	1	0	0	0	16	0	1838.7595	G3MYP5	G3MYP5	1012	1027	yes	yes	2	1.3119E-05	135.47	1		1	34308000	21959000	0	12349000
SEQDQAENEGEDSAVLMER	TPPEGSSKSEQDQAEN	DSAVLMERLCKYIYAK	K	S	E	E	R	L	2	1	1	2	0	2	5	1	0	0	1	0	1	0	0	2	0	0	0	1	0	19	0	2135.8913	Q3SYW6	Q3SYW6	531	549	yes	yes	2	0.0016029	97.271	1			0	0	0	0
SFPSYYTSHVQEEQIEVEETIEAAK	SSYLMSARSFPSYYTS	EETIEAAKAEEAKDEP	R	S	F	A	K	A	2	0	0	0	0	2	6	0	1	2	0	1	0	1	1	3	2	0	2	2	0	25	0	2913.3556	P02548	P02548	439	463	yes	yes	2	2.8962E-08	119.76	1	1	1	75025000	22320000	31408000	21297000
SFPSYYTSHVQEEQIEVEETIEAAKAEEAK	SSYLMSARSFPSYYTS	AAKAEEAKDEPPSEGE	R	S	F	A	K	D	4	0	0	0	0	2	8	0	1	2	0	2	0	1	1	3	2	0	2	2	0	30	1	3441.61	P02548	P02548	439	468	yes	yes	3	0.015241	71.299		1		5164200	0	5164200	0
SGGGGGGGLGSGGSIR	FSSSYLSRSGGGGGGG	LGSGGSIRSSYSRFSS	R	S	G	I	R	S	0	1	0	0	0	0	0	10	0	1	1	0	0	0	0	3	0	0	0	0	0	16	0	1231.5905	CON__P35527	CON__P35527	14	29	yes	yes	2	3.177E-08	164.63	1	1	1	56147000	31966000	11914000	12268000
SGPFGQIFRPDNFVFGQSGAGNNWAK	PGTMDSVRSGPFGQIF	GAGNNWAKGHYTEGAE	R	S	G	A	K	G	2	1	3	1	0	2	0	5	0	1	0	1	0	4	2	2	0	1	0	1	0	26	1	2797.3361	Q2KJD0;Q3MHM5;E1BJB1;Q6B856;G3X7R7;G3N1W7;Q3ZBU7	Q3MHM5	78	103	no	no	2	0.023599	74.123	1	1		10175000	5454100	4720600	0
SGSHGYDMSTFIR	NLSNFLDKSGSHGYDM	YDMSTFIRRYSRYLNE	K	S	G	I	R	R	0	1	0	1	0	0	0	2	1	1	0	0	1	1	0	3	1	0	1	0	0	13	0	1456.6405	F1MGT4	F1MGT4	69	81	yes	yes	2	0.0049955	109.6	1	1		0	0	0	0
SIELESVR	YRRQLQSKSIELESVR	SIELESVRGTKESLER	K	S	I	V	R	G	0	1	0	0	0	0	2	0	0	1	1	0	0	0	0	2	0	0	0	1	0	8	0	931.49746	F1MDZ2;O77788	F1MDZ2	328	335	yes	no	2	0.00061181	167.24	1	1	1	210540000	116490000	55340000	38713000
SIMTEQLETIPKEEK	VDTQDDDRSIMTEQLE	ETIPKEEKAEKEARRS	R	S	I	E	K	A	0	0	0	0	0	1	4	0	0	2	1	2	1	0	1	1	2	0	0	0	0	15	1	1774.9023	F1MEW3	F1MEW3	1408	1422	yes	yes	2;3	2.4033E-11	204.23	2	2	2	0	0	0	0
SIQPGSDYYELSDTR	ALKEEVTKSIQPGSDY	YYELSDTRESVQEAFD	K	S	I	T	R	E	0	1	0	2	0	1	1	1	0	1	1	0	0	0	1	3	1	0	2	0	0	15	0	1729.7795	F1MEW3	F1MEW3	588	602	yes	yes	2	4.4806E-05	130.72	1	1	1	235500000	114860000	66532000	54107000
SISISVAR	LVNLGGSKSISISVAR	SISISVARGGGRGSGF	K	S	I	A	R	G	1	1	0	0	0	0	0	0	0	2	0	0	0	0	0	3	0	0	0	1	0	8	0	831.48142	CON__P04264	CON__P04264	75	82	yes	yes	2	0.034254	87.181		1		7178800	0	7178800	0
SIVHPSYNSNTLNNDIMLIK	EQFISASKSIVHPSYN	NNDIMLIKLKSAASLN	K	S	I	I	K	L	0	0	4	1	0	0	0	0	1	3	2	1	1	0	1	3	1	0	1	1	0	20	0	2272.1522	P00760	P00760	93	112	yes	yes	2;3	8.1252E-22	214.55	7	8	9	859520000	388610000	245360000	225550000
SKAEAESLYQSK	QNEDIAQKSKAEAESL	AESLYQSKYEELQITA	K	S	K	S	K	Y	2	0	0	0	0	1	2	0	0	0	1	2	0	0	0	3	0	0	1	0	0	12	1	1339.662	CON__P04264	CON__P04264	365	376	yes	yes	2;3	6.7661E-08	214.48	2	2	1	92996000	54026000	23286000	15684000
SKEEAEALYHSK	QYEEIAQRSKEEAEAL	AEALYHSKYEELQVTV	R	S	K	S	K	Y	2	0	0	0	0	0	3	0	1	0	1	2	0	0	0	2	0	0	1	0	0	12	1	1390.6729	CON__P35908	CON__P35908	369	380	yes	yes	2	1.2655E-06	169.79	1		1	5401200	4112500	0	1288700
SKEEAEALYHSKYEELQVTVGR	QYEEIAQRSKEEAEAL	ELQVTVGRHGDSLKEI	R	S	K	G	R	H	2	1	0	0	0	1	5	1	1	0	2	2	0	0	0	2	1	0	2	2	0	22	2	2565.2711	CON__P35908	CON__P35908	369	390	yes	yes	3;4	1.2275E-09	165.38	2	2	2	58090000	28289000	14080000	15721000
SKFADLNDAAAR	HEAEEWYRSKFADLND	DLNDAAARNAELLRQA	R	S	K	A	R	N	4	1	1	2	0	0	0	0	0	0	1	1	0	1	0	1	0	0	0	0	0	12	1	1277.6364	Q28115	Q28115	255	266	yes	yes	2;3	3.9782E-07	193.28	2	2	2	21841000	10336000	5427400	6077500
SKFANLNEQAAR	QSAEEWYKSKFANLNE	NLNEQAARSTEAIRAS	K	S	K	A	R	S	3	1	2	0	0	1	1	0	0	0	1	1	0	1	0	1	0	0	0	0	0	12	1	1347.6895	Q08DH7	Q08DH7	289	300	yes	yes	2;3	9.9947E-07	177.1	2	1	2	23188000	13305000	3554700	6329100
SKIGSTDNIK	LPDLKNVKSKIGSTDN	IGSTDNIKYQPKGGQV	K	S	K	I	K	Y	0	0	1	1	0	0	0	1	0	2	0	2	0	0	0	2	1	0	0	0	0	10	1	1061.5717	F1MEW3	F1MEW3	1683	1692	yes	yes	2	0.0037602	119.03		1		1584500	0	1584500	0
SKPSAASPKPGALK	PVKKGDGKSKPSAASP	SPKPGALKESSDKVSK	K	S	K	L	K	E	3	0	0	0	0	0	0	1	0	0	1	3	0	0	3	3	0	0	0	0	0	14	2	1337.7667	F1N1S2	F1N1S2	2260	2273	yes	yes	3	0.010089	93.243	1	1	1	21352000	12207000	5927600	3217400
SLDFLIELLHKDQLDETVNVEPLTK	PEMSAHERSLDFLIEL	VNVEPLTKAIKYYQHL	R	S	L	T	K	A	0	0	1	3	0	1	3	0	1	1	6	2	0	1	1	1	2	0	0	2	0	25	1	2908.5434	F1MIC9	F1MIC9	661	685	yes	yes	3	0.00010851	92.886	1	1	1	12716000	6403900	3301700	3009900
SLDLDSIIAEVK	ILSMDNNRSLDLDSII	DSIIAEVKAQNEDIAQ	R	S	L	V	K	A	1	0	0	2	0	0	1	0	0	2	2	1	0	0	0	2	0	0	0	1	0	12	0	1301.7078	CON__P04264	CON__P04264	344	355	no	no	2	0.00012286	129.34	1	1	1	56185000	32916000	11315000	11954000
SLEETGSPATAK	LLQPDDQKSLEETGSP	TGSPATAKDSSKVEEP	K	S	L	A	K	D	2	0	0	0	0	0	2	1	0	0	1	1	0	0	1	2	2	0	0	0	0	12	0	1189.5826	F1MEW3	F1MEW3	352	363	yes	yes	2	0.00297	105.65	1	1	1	137580000	79599000	26743000	31235000
SLEGEAAALR	RQLEAHNRSLEGEAAA	EGEAAALRQQQAGRAA	R	S	L	L	R	Q	3	1	0	0	0	0	2	1	0	0	2	0	0	0	0	1	0	0	0	0	0	10	0	1015.5298	F1MSQ6	F1MSQ6	120	129	yes	yes	2	0.00029866	134.23	1	1	1	120150000	70454000	25244000	24453000
SLLEGEGSSGGGGR	ENEIQTYRSLLEGEGS	GSSGGGGRGGGSFGGG	R	S	L	G	R	G	0	1	0	0	0	0	2	6	0	0	2	0	0	0	0	3	0	0	0	0	0	14	0	1261.5899	CON__P13645	CON__P13645	451	464	yes	yes	2	1.1053E-07	164.13	1	1	1	19133000	10098000	4614700	4421000
SLNNQFASFIDK	SREREQIKSLNNQFAS	QFASFIDKVRFLEQQN	K	S	L	D	K	V	1	0	2	1	0	1	0	0	0	1	1	1	0	2	0	2	0	0	0	0	0	12	0	1382.683	CON__P04264	CON__P04264	186	197	no	no	2	0.00012797	126.83		1	1	27121000	0	13654000	13467000
SLNNQFASFIDKVR	SREREQIKSLNNQFAS	ASFIDKVRFLEQQNQV	K	S	L	V	R	F	1	1	2	1	0	1	0	0	0	1	1	1	0	2	0	2	0	0	0	1	0	14	1	1637.8526	CON__P04264	CON__P04264	186	199	no	no	2;3	9.8504E-13	220.4	2	2	1	58703000	35577000	13780000	9346400
SLQQLAEER	KELNERWRSLQQLAEE	LQQLAEERSQLLGSAH	R	S	L	E	R	S	1	1	0	0	0	2	2	0	0	0	2	0	0	0	0	1	0	0	0	0	0	9	0	1072.5513	E1BFB0	E1BFB0	1217	1225	yes	yes	2	0.00035885	157.96	1		1	35252000	30732000	0	4519500
SLSLSEESPSK	QGSPEDIRSLSLSEES	LSEESPSKETSLDISS	R	S	L	S	K	E	0	0	0	0	0	0	2	0	0	0	2	1	0	0	1	5	0	0	0	0	0	11	0	1162.5717	F1N3M8;G3MYP5	G3MYP5	1190	1200	no	no	2	5.3932E-06	149.96	1	1	1	34261000	20096000	7748100	6416300
SLSLSEESPSKETSLDISSK	QGSPEDIRSLSLSEES	TSLDISSKQLSPESLG	R	S	L	S	K	Q	0	0	0	1	0	0	3	0	0	1	3	2	0	0	1	8	1	0	0	0	0	20	1	2123.0481	F1N3M8;G3MYP5	G3MYP5	1190	1209	no	no	2;3	4.7686E-29	277.1	2	2	2	77364000	23194000	31533000	22637000
SNAHYNLQNAFNLAEQHLGLTK	IDFDKLKKSNAHYNLQ	EQHLGLTKLLDPEDIS	K	S	N	T	K	L	3	0	4	0	0	2	1	1	2	0	4	1	0	1	0	1	1	0	1	0	0	22	0	2482.2353	F1MYC9	F1MYC9	228	249	yes	yes	3	3.2687E-10	140.12			1	3267400	0	0	3267400
SNEKEQLQGLNDR	GGDYKLSRSNEKEQLQ	QLQGLNDRFAGYIEKV	R	S	N	D	R	F	0	1	2	1	0	2	2	1	0	0	2	1	0	0	0	1	0	0	0	0	0	13	1	1529.7434	F1MDZ2	F1MDZ2	99	111	yes	yes	2;3	6.0371E-44	266.75	4	3	3	434940000	217170000	104700000	113060000
SNHEEEVADLLAQIQASHITVER	QDEVAFLRSNHEEEVA	ASHITVERKDYLKTDI	R	S	N	E	R	K	3	1	1	1	0	2	4	0	2	2	2	0	0	0	0	2	1	0	0	2	0	23	0	2588.2831	F1MDZ2;O77788	F1MDZ2	236	258	yes	no	2;3;4	1.4826E-34	241.25	3	3	3	961180000	603960000	200330000	156890000
SNHEEEVADLLAQIQASHITVERK	QDEVAFLRSNHEEEVA	SHITVERKDYLKTDIS	R	S	N	R	K	D	3	1	1	1	0	2	4	0	2	2	2	1	0	0	0	2	1	0	0	2	0	24	1	2716.378	F1MDZ2;O77788	F1MDZ2	236	259	yes	no	3;4	5.4037E-09	142.32	1	1	2	147860000	81565000	28024000	38268000
SNIEETTISSQK	ISTKKTEKSNIEETTI	ETTISSQKI_______	K	S	N	Q	K	I	0	0	1	0	0	1	2	0	0	2	0	1	0	0	0	3	2	0	0	0	0	12	0	1335.6518	Q08DH7	Q08DH7	487	498	yes	yes	2	0.00020995	118.87	1	1	1	29981000	14084000	7699200	8197700
SNIEETTISSQKI	ISTKKTEKSNIEETTI	TTISSQKI________	K	S	N	K	I	-	0	0	1	0	0	1	2	0	0	3	0	1	0	0	0	3	2	0	0	0	0	13	1	1448.7359	Q08DH7	Q08DH7	487	499	yes	yes	2	2.2792E-05	139.48	1	1	1	236880000	108470000	75199000	53209000
SPASDGLDLSQAAAR	GLGLAYRRSPASDGLD	DLSQAAARTNEYKIIR	R	S	P	A	R	T	4	1	0	2	0	1	0	1	0	0	2	0	0	0	1	3	0	0	0	0	0	15	0	1457.711	Q08DH7	Q08DH7	69	83	yes	yes	2	1.2081E-30	303.3	2	2	2	302420000	176230000	69960000	56231000
SPEDGGYAYEITEK	ETMEKTSKSPEDGGYA	YAYEITEKTTRSPEES	K	S	P	E	K	T	1	0	0	1	0	0	3	2	0	1	0	1	0	0	1	1	1	0	2	0	0	14	0	1557.6835	F1N1S2	F1N1S2	1927	1940	yes	yes	2	3.8336E-16	173.33	1	1	1	10050000	4755800	0	5293900
SPEESGYAYEISEK	EITEKTTRSPEESGYA	YAYEISEKTIRTPEVS	R	S	P	E	K	T	1	0	0	0	0	0	4	1	0	1	0	1	0	0	1	3	0	0	2	0	0	14	0	1587.694	F1N1S2	F1N1S2	1944	1957	yes	yes	2	8.6731E-05	118.51		1		6807900	0	6807900	0
SPESLPSPAVEDIVMEWEGK	TPDSSLTKSPESLPSP	IVMEWEGKVPKLKDRP	K	S	P	G	K	V	1	0	0	1	0	0	4	1	0	1	1	1	1	0	3	3	0	1	0	2	0	20	0	2199.0406	G3MYP5	G3MYP5	1320	1339	yes	yes	2	5.1522E-05	104.84	1	1	1	0	0	0	0
SPESLPSPAVEDIVMEWEGKVPK	TPDSSLTKSPESLPSP	EWEGKVPKLKDRPPEQ	K	S	P	P	K	L	1	0	0	1	0	0	4	1	0	1	1	2	1	0	4	3	0	1	0	3	0	23	1	2523.2567	G3MYP5	G3MYP5	1320	1342	yes	yes	3	0.007058	89.663	1	1	1	0	0	0	0
SPPTSASVSTVIDGPTHILVR	VALKEQARSPPTSASV	GPTHILVRDVSDTVAF	R	S	P	V	R	D	1	1	0	1	0	0	0	1	1	2	1	0	0	0	3	4	3	0	0	3	0	21	0	2133.143	E1BKN2	E1BKN2	493	513	yes	yes	2;3	4.4113E-18	192.18	2	1	1	134710000	64579000	35227000	34901000
SPPYEDFSVTGESEK	LEEDKGFKSPPYEDFS	SVTGESEKRGEMVGRG	K	S	P	E	K	R	0	0	0	1	0	0	3	1	0	0	0	1	0	1	2	3	1	0	1	1	0	15	0	1670.7312	F1N3M8;G3MYP5	G3MYP5	901	915	no	no	2	2.5873E-11	176.4	1	1	1	73461000	42953000	17643000	12865000
SPPYEDFSVTGESEKR	LEEDKGFKSPPYEDFS	VTGESEKRGEMVGRGL	K	S	P	K	R	G	0	1	0	1	0	0	3	1	0	0	0	1	0	1	2	3	1	0	1	1	0	16	1	1826.8323	F1N3M8;G3MYP5	G3MYP5	901	916	no	no	3	1.9448E-08	150.39			1	5607500	0	0	5607500
SPQAQEVSISIAGGQAGR	EGKASPPRSPQAQEVS	IAGGQAGRTIQLLPEQ	R	S	P	G	R	T	3	1	0	0	0	3	1	3	0	2	0	0	0	0	1	3	0	0	0	1	0	18	0	1754.8911	G3MYP5	G3MYP5	1062	1079	yes	yes	2	1.6127E-21	205.12	1	1	1	65180000	35618000	15411000	14151000
SPSLSPSPPSPIEK	DEKLSPPKSPSLSPSP	SPPSPIEKTPLGERSV	K	S	P	E	K	T	0	0	0	0	0	0	1	0	0	1	1	1	0	0	5	5	0	0	0	0	0	14	0	1421.7402	F1N1S2	F1N1S2	1250	1263	yes	yes	2	1.748E-07	139.86	1	1	1	12633000	7334400	3249600	2048700
SPVEEVKPK	AAKSPAAKSPVEEVKP	PVEEVKPKAEAGAEKG	K	S	P	P	K	A	0	0	0	0	0	0	2	0	0	0	0	2	0	0	2	1	0	0	0	2	0	9	1	1011.5601	F1MDZ2;O77788	F1MDZ2	695	703	yes	no	2;3	0.0002129	150.66	2	2	2	48766000	27404000	11551000	9810600
SPVKEEEKPQEVR	VPKKEEAKSPVKEEEK	EEKPQEVRAKEPPKKA	K	S	P	V	R	A	0	1	0	0	0	1	4	0	0	0	0	2	0	0	2	1	0	0	0	2	0	13	2	1553.8049	F1MSQ6	F1MSQ6	883	895	yes	yes	2;3;4	1.9935E-10	246.86	3	2	2	93221000	57340000	23224000	12657000
SQLESHSDQNMHQAEEWFK	STALKEIRSQLESHSD	HQAEEWFKCRYAKLTE	R	S	Q	F	K	C	1	0	1	1	0	3	3	0	2	0	1	1	1	1	0	3	0	1	0	0	0	19	0	2330.0022	F1MDZ2;O77788	F1MDZ2	275	293	yes	no	2;3;4	8.6157E-09	128.01	5	4	3	0	0	0	0
SQLLGSAHEVQR	LQQLAEERSQLLGSAH	GSAHEVQRFHRDADET	R	S	Q	Q	R	F	1	1	0	0	0	2	1	1	1	0	2	0	0	0	0	2	0	0	0	1	0	12	0	1323.6895	E1BFB0	E1BFB0	1226	1237	yes	yes	2;3	4.6462E-09	207.88	2	2	2	62132000	35392000	14117000	12623000
SQNIITDSSLNAEAIR	RIDDIFERSQNIITDS	SLNAEAIRQRLADLKQ	R	S	Q	I	R	Q	2	1	2	1	0	1	1	0	0	3	1	0	0	0	0	3	1	0	0	0	0	16	0	1730.8799	F1MYC9	F1MYC9	1548	1563	yes	yes	2	5.9582E-08	136.34	1	1		17605000	12978000	4626900	0
SQSWSR	GSPSSGFRSQSWSRGS	FRSQSWSRGSPSTVSS	R	S	Q	S	R	G	0	1	0	0	0	1	0	0	0	0	0	0	0	0	0	3	0	1	0	0	0	6	0	749.34565	F1MDZ2;O77788	F1MDZ2	37	42	yes	no	2	0.011349	116.11	1	1		15468000	9793200	5675200	0
SQYEQLAEQNR	TQLLNNMRSQYEQLAE	EQLAEQNRKDAEAWFN	R	S	Q	N	R	K	1	1	1	0	0	3	2	0	0	0	1	0	0	0	0	1	0	0	1	0	0	11	0	1364.6321	CON__P13645	CON__P13645	323	333	yes	yes	2	4.5677E-18	251.43	1	1	1	13313000	6920700	4172500	2219300
SQYEQLAEQNRK	TQLLNNMRSQYEQLAE	QLAEQNRKDAEAWFNE	R	S	Q	R	K	D	1	1	1	0	0	3	2	0	0	0	1	1	0	0	0	1	0	0	1	0	0	12	1	1492.727	CON__P13645	CON__P13645	323	334	yes	yes	2	1.6451E-08	220.45	1	1	1	123310000	71747000	29132000	22434000
SSFSYEPYYSTSYKR	________________	YYSTSYKRRYVETPRV	M	S	S	K	R	R	0	1	0	0	0	0	1	0	0	0	0	1	0	1	1	5	1	0	4	0	0	15	1	1863.8315	P02548	P02548	2	16	yes	yes	2	0.00038544	148.52		1	1	28235000	0	14096000	14139000
SSGTSYPDVLK	ISGWGNTKSSGTSYPD	TSYPDVLKCLKAPILS	K	S	S	L	K	C	0	0	0	1	0	0	0	1	0	0	1	1	0	0	1	3	1	0	1	1	0	11	0	1152.5663	P00760	P00760	149	159	yes	yes	2	0.00011993	136.5	1	1	1	1637000000	923830000	376400000	336780000
SSHLPTEVIEKPAAVPVSFEFSDAKDESER	YQSPTEEKSSHLPTEV	DAKDESERASISPMDE	K	S	S	E	R	A	3	1	0	2	0	0	5	0	1	1	1	2	0	2	3	5	1	0	0	3	0	30	2	3300.615	F1N1S2	F1N1S2	1339	1368	yes	yes	3	0.021754	76.002	1			19560000	19560000	0	0
SSITSTAFVTGGR	QAAQDTERSSITSTAF	TAFVTGGRVFPHPQDC	R	S	S	G	R	V	1	1	0	0	0	0	0	2	0	1	0	0	0	1	0	3	3	0	0	1	0	13	0	1282.6517	E1BKN2	E1BKN2	1118	1130	yes	yes	2	1.3596E-06	142.83	1	1	1	38055000	13563000	14808000	9684300
SSLSSAQADFNQLAELDR	REAHDAFRSSLSSAQA	NQLAELDRQIKSFRVA	R	S	S	D	R	Q	3	1	1	2	0	2	1	0	0	0	3	0	0	1	0	4	0	0	0	0	0	18	0	1950.9283	E1BFB0	E1BFB0	2138	2155	yes	yes	2	3.6623E-09	153.21	1	1	1	45129000	23281000	9699100	12149000
SSYYVVSGNDPAAEEPSR	VEFFKRVRSSYYVVSG	PAAEEPSRAVLDALLE	R	S	S	S	R	A	2	1	1	1	0	0	2	1	0	0	0	0	0	0	2	4	0	0	2	2	0	18	0	1926.8595	F1N1S2	F1N1S2	2380	2397	yes	yes	2	1.4142E-06	126.84		1	1	91456000	0	44873000	46583000
STAGDTHLGGEDFDNR	EDGIFEVKSTAGDTHL	GGEDFDNRMVNHFIAE	K	S	T	N	R	M	1	1	1	3	0	0	1	3	1	0	1	0	0	1	0	1	2	0	0	0	0	16	0	1690.7183	P19120	P19120	221	236	yes	yes	2;3	4.0054E-17	236.43	2	2	2	120590000	65033000	33809000	21749000
STDDSDPPTEEAR	FLNPPLPRSTDDSDPP	DPPTEEARLVGRGGRR	R	S	T	A	R	L	1	1	0	3	0	0	2	0	0	0	0	0	0	0	2	2	2	0	0	0	0	13	0	1418.5797	F1N3M8;G3MYP5	G3MYP5	2463	2475	no	no	2	3.0791E-07	170.18	1	1	1	23413000	10584000	7182700	5646100
STDFIPIKEDFGQEK	FQDKQEGKSTDFIPIK	KEDFGQEKKTDDVEDM	K	S	T	E	K	K	0	0	0	2	0	1	2	1	0	2	0	2	0	2	1	1	1	0	0	0	0	15	1	1752.857	F1N1S2	F1N1S2	1456	1470	yes	yes	2	7.7623E-05	125.36	1	1	1	36981000	18980000	10503000	7498400
STLEPVEK	ELCSDLFRSTLEPVEK	STLEPVEKALRDAKLD	R	S	T	E	K	A	0	0	0	0	0	0	2	0	0	0	1	1	0	0	1	1	1	0	0	1	0	8	0	901.47566	Q27975;Q27965	Q27975	312	319	no	no	2	0.0065231	120.15		1		2557000	0	2557000	0
STMQELNSR	GILTANEKSTMQELNS	TMQELNSRLASYLDKV	K	S	T	S	R	L	0	1	1	0	0	1	1	0	0	0	1	0	1	0	0	2	1	0	0	0	0	9	0	1064.4921	CON__P35527	CON__P35527	155	163	yes	yes	2	0.00085948	166.09	1	1	1	0	0	0	0
STPSQVTPAEEKDGHSPMSK	SRVPPRPRSTPSQVTP	DGHSPMSKGLVNGLKA	R	S	T	S	K	G	1	0	0	1	0	1	2	1	1	0	0	2	1	0	3	4	2	0	0	1	0	20	1	2111.9793	F1N3M8;G3MYP5	G3MYP5	2652	2671	no	no	2;3	0.031318	65.598	2	1	1	0	0	0	0
SVDPTLALSVYLR	EELGDLVKSVDPTLAL	LALSVYLRANVPNKVI	K	S	V	L	R	A	1	1	0	1	0	0	0	0	0	0	3	0	0	0	1	2	1	0	1	2	0	13	0	1432.7926	P49951;F1MPU0	P49951	469	481	yes	no	2	1.7895E-09	198.97	3	5	4	1382300000	633300000	375540000	373480000
SVGNTIDPVILFQK	MKPEPLFRSVGNTIDP	DPVILFQKMGVGKLEM	R	S	V	Q	K	M	0	0	1	1	0	1	0	1	0	2	1	1	0	1	1	1	1	0	0	2	0	14	0	1529.8453	F1N1S2	F1N1S2	401	414	yes	yes	2	0.00012545	110.14	1	1	1	49361000	23720000	13040000	12601000
SVLISLK	AKDVSRMRSVLISLKQ	RSVLISLKQAPLVH__	R	S	V	L	K	Q	0	0	0	0	0	0	0	0	0	1	2	1	0	0	0	2	0	0	0	1	0	7	0	758.49019	P04973	P04973	231	237	yes	yes	2	0.042322	83.753	1	1	1	626660000	340890000	147870000	137910000
SVLMSLK	CKDVSRLRSVLMSLKQ	RSVLMSLKQTPLSR__	R	S	V	L	K	Q	0	0	0	0	0	0	0	0	0	0	2	1	1	0	0	2	0	0	0	1	0	7	0	776.44661	P04975;G3N252	P04975	216	222	yes	no	1;2	0.019653	75.109	1	2	2	20068000	0	11237000	8831400
SVLQAVQK	TISFRIYKSVLQAVQK	SVLQAVQKTDEGHPFK	K	S	V	Q	K	T	1	0	0	0	0	2	0	0	0	0	1	1	0	0	0	1	0	0	0	2	0	8	0	871.51272	E1BP30;Q1LZ76	E1BP30	564	571	yes	no	2	0.036387	93.162	1	1	1	8719300	4978000	1807600	1933700
SVLVSAGNVK	DFGLRALKSVLVSAGN	LVSAGNVKRERIQKIK	K	S	V	V	K	R	1	0	1	0	0	0	0	1	0	0	1	1	0	0	0	2	0	0	0	3	0	10	0	972.5604	E1BDX8	E1BDX8	2095	2104	yes	yes	2	0.0098823	95.775	1	1		4481800	2931000	1550800	0
SVNESLNNLFITEEDYQALR	SVQNHNNKSVNESLNN	EEDYQALRTSIDAYDN	K	S	V	L	R	T	1	1	3	1	0	1	3	0	0	1	3	0	0	1	0	2	1	0	1	1	0	20	0	2354.139	P49951;F1MPU0	P49951	1462	1481	yes	no	2;3	9.104E-18	182.82	8	7	6	3975200000	1686100000	1200000000	1089100000
SVNFSLTPNEIK	EKTPLGERSVNFSLTP	SLTPNEIKVSAEAEVV	R	S	V	I	K	V	0	0	2	0	0	0	1	0	0	1	1	1	0	1	1	2	1	0	0	1	0	12	0	1347.7034	F1N1S2	F1N1S2	1270	1281	yes	yes	2	6.1759E-05	127.56	1	1	1	21515000	10228000	6653200	4634300
SVQNHNNK	PLVKPYLRSVQNHNNK	SVQNHNNKSVNESLNN	R	S	V	N	K	S	0	0	3	0	0	1	0	0	1	0	0	1	0	0	0	1	0	0	0	1	0	8	0	939.45224	P49951;F1MPU0	P49951	1454	1461	yes	no	2	0.061284	46.426	1			0	0	0	0
SVSEGHLK	RETSLDTKSVSEGHLK	SVSEGHLKRNIVVKTV	K	S	V	L	K	R	0	0	0	0	0	0	1	1	1	0	1	1	0	0	0	2	0	0	0	1	0	8	0	855.44503	Q28115	Q28115	394	401	yes	yes	2	0.034876	80.438	1		1	13696000	13696000	0	0
SVSEGHLKR	RETSLDTKSVSEGHLK	VSEGHLKRNIVVKTVE	K	S	V	K	R	N	0	1	0	0	0	0	1	1	1	0	1	1	0	0	0	2	0	0	0	1	0	9	1	1011.5461	Q28115	Q28115	394	402	yes	yes	3	0.0041479	101.72	1		1	17119000	12261000	0	4857800
SVTVTQKVEEHEETFEEK	GATKYITKSVTVTQKV	HEETFEEKLVSTKKVE	K	S	V	E	K	L	0	0	0	0	0	1	6	0	1	0	0	2	0	1	0	1	3	0	0	3	0	18	1	2148.0223	F1MDZ2;O77788	F1MDZ2	886	903	yes	no	2;3;4	2.8229E-22	251.13	3	3	3	491760000	253960000	147250000	90542000
SWLADIPPWVPK	MRDEPTTRSWLADIPP	DIPPWVPKDRPLPPAP	R	S	W	P	K	D	1	0	0	1	0	0	0	0	0	1	1	1	0	0	3	1	0	2	0	1	0	12	0	1407.7551	G3MYP5	G3MYP5	1844	1855	yes	yes	2	0.0045031	93.623	1	1	1	18024000	11026000	3657300	3340400
SYELPDGQVITIGNER	ASSSSLEKSYELPDGQ	VITIGNERFRCPEALF	K	S	Y	E	R	F	0	1	1	1	0	1	2	2	0	2	1	0	0	0	1	1	1	0	1	1	0	16	0	1789.8846	P63258;P60712;F1MRD0	P63258	239	254	no	no	2	7.6243E-05	106.38	1	1	1	56201000	33026000	13050000	10125000
SYVSSSEMVVGGR	RVTSATRRSYVSSSEM	SEMVVGGRRLGPGTRL	R	S	Y	G	R	R	0	1	0	0	0	0	1	2	0	0	0	0	1	0	0	4	0	0	1	3	0	13	0	1356.6344	Q28115	Q28115	13	25	yes	yes	2	0.0077608	102.87	1	1	1	0	0	0	0
TAAENDFVTLK	YEDEINKRTAAENDFV	ENDFVTLKKDVDNAYM	R	T	A	L	K	K	2	0	1	1	0	0	1	0	0	0	1	1	0	1	0	0	2	0	0	1	0	11	0	1207.6085	CON__P35908	CON__P35908	282	292	yes	yes	2	0.0070385	95.498			1	2534400	0	0	2534400
TAAENDFVTLKK	YEDEINKRTAAENDFV	NDFVTLKKDVDNAYMI	R	T	A	K	K	D	2	0	1	1	0	0	1	0	0	0	1	2	0	1	0	0	2	0	0	1	0	12	1	1335.7034	CON__P35908	CON__P35908	282	293	yes	yes	2;3	4.9607E-05	135.08	2	2	1	44465000	27137000	13431000	3897400
TAASGIPYHSEVPVSLK	MGFYKDAKTAASGIPY	SEVPVSLKEAICEVAL	K	T	A	L	K	E	2	0	0	0	0	0	1	1	1	1	1	1	0	0	2	3	1	0	1	2	0	17	0	1754.9203	F1MYC9	F1MYC9	2241	2257	yes	yes	3	0.048132	34.202			1	4364700	0	0	4364700
TADLDFFR	IPNHCSGKTADLDFFR	TADLDFFRRVRASYYV	K	T	A	F	R	R	1	1	0	2	0	0	0	0	0	0	1	0	0	2	0	0	1	0	0	0	0	8	0	983.47125	F1N3M8;G3MYP5	G3MYP5	2709	2716	no	no	2	0.0010294	141.39	1	1		9918500	6131100	3787500	0
TALPAQSAATLPAR	PTSDRKAKTALPAQSA	SAATLPARTQETPSAQ	K	T	A	A	R	T	5	1	0	0	0	1	0	0	0	0	2	0	0	0	2	1	2	0	0	0	0	14	0	1366.7569	F1MYC9	F1MYC9	2177	2190	yes	yes	2	3.4253E-06	142.1	1	1	1	51035000	29885000	14683000	6466800
TATDEAYKDPSNLQGK	SWVNEKMKTATDEAYK	DPSNLQGKVQKHQAFE	K	T	A	G	K	V	2	0	1	2	0	1	1	1	0	0	1	2	0	0	1	1	2	0	1	0	0	16	1	1736.8217	E1BFB0	E1BFB0	595	610	yes	yes	2	1.1763E-17	248.81	1	1	1	24996000	13031000	6494300	5470600
TDISTALK	VERKDYLKTDISTALK	TDISTALKEIRSQLES	K	T	D	L	K	E	1	0	0	1	0	0	0	0	0	1	1	1	0	0	0	1	2	0	0	0	0	8	0	847.4651	F1MDZ2;O77788	F1MDZ2	264	271	yes	no	2	0.0095228	99.442	1	1	1	217580000	134710000	53747000	29118000
TEAQAKEPGKEASTPGK	KKPEEKPKTEAQAKEP	KEASTPGKAKAEKSSS	K	T	E	G	K	A	3	0	0	0	0	1	3	2	0	0	0	3	0	0	2	1	2	0	0	0	0	17	2	1727.869	F1MSQ6	F1MSQ6	1036	1052	yes	yes	3	0.00053409	112.82	1			11265000	11265000	0	0
TEATQGLDYVPSAGTISPTSSLEEDKGFK	VTSIPSSRTEATQGLD	LEEDKGFKSPPYEDFS	R	T	E	F	K	S	2	0	0	2	0	1	3	3	0	1	2	2	0	1	2	4	4	0	1	1	0	29	1	3027.4561	F1N3M8;G3MYP5	G3MYP5	872	900	no	no	3	0.05901	36.777		1		13380000	0	13380000	0
TELDSPR	VPATMNARTELDSPRD	RTELDSPRDLMVTASS	R	T	E	P	R	D	0	1	0	1	0	0	1	0	0	0	1	0	0	0	1	1	1	0	0	0	0	7	0	816.39775	E1BKN2	E1BKN2	684	690	yes	yes	2	0.005189	134.66	1	1	1	14859000	7954000	4065100	2839900
TEPSLVVPDIGLPAEPTAAK	SLEDTKPKTEPSLVVP	PAEPTAAKEQKDWFIQ	K	T	E	A	K	E	3	0	0	1	0	0	2	1	0	1	2	1	0	0	4	1	2	0	0	2	0	20	0	2004.0779	F1MEW3	F1MEW3	241	260	yes	yes	2	0.0018319	77.031	1	1	1	188880000	105520000	35400000	47959000
TESSEALKAEK	PAKPERVKTESSEALK	SEALKAEKRKLIKDKV	K	T	E	E	K	R	2	0	0	0	0	0	3	0	0	0	1	2	0	0	0	2	1	0	0	0	0	11	1	1191.5983	F1N3M8;G3MYP5	G3MYP5	382	392	no	no	2	6.3937E-05	155.24	1			2106200	2106200	0	0
TEYLSNADER	QFRTDIARTEYLSNAD	YLSNADERLRWQASSL	R	T	E	E	R	L	1	1	1	1	0	0	2	0	0	0	1	0	0	0	0	1	1	0	1	0	0	10	0	1196.5309	E1BDX8	E1BDX8	3550	3559	yes	yes	2	0.00015276	146.11	1			2683800	2683800	0	0
TGAEGAVLDEAK	AGSEKVSKTGAEGAVL	GAVLDEAKNINKSLSA	K	T	G	A	K	N	3	0	0	1	0	0	2	2	0	0	1	1	0	0	0	0	1	0	0	1	0	12	0	1159.5721	F6RAG5;F1N1G7;F1MZB0	F6RAG5	242	253	yes	no	2	0.00021625	122.39	1		1	10663000	8536600	0	2126400
TGIVLANGK	WAGNSKAKTGIVLANG	GIVLANGKEAEISVPY	K	T	G	G	K	E	1	0	1	0	0	0	0	2	0	1	1	1	0	0	0	0	1	0	0	1	0	9	0	871.51272	F1N3M8;G3MYP5	G3MYP5	227	235	no	no	2	0.023429	90.64	1	1		7264400	4365100	2899300	0
THINAVVAK	DQYLGLVRTHINAVVA	HINAVVAKIQAKIPGA	R	T	H	A	K	I	2	0	1	0	0	0	0	0	1	1	0	1	0	0	0	0	1	0	0	2	0	9	0	951.55016	E1BP30;Q1LZ76	E1BP30	676	684	yes	no	2	0.00050063	113.1	1	1		12711000	9715900	2995300	0
THNLEPYFESFINNLR	QQVDTSTRTHNLEPYF	ESFINNLRRRVDQLKS	R	T	H	L	R	R	0	1	3	0	0	0	2	0	1	1	2	0	0	2	1	1	1	0	1	0	0	16	0	1992.9694	CON__P04264	CON__P04264	224	239	yes	yes	2;3	4.0432E-08	144.38	2	2	2	57102000	30634000	15506000	10962000
THNLEPYFESFINNLRR	QQVDTSTRTHNLEPYF	SFINNLRRRVDQLKSD	R	T	H	R	R	R	0	2	3	0	0	0	2	0	1	1	2	0	0	2	1	1	1	0	1	0	0	17	1	2149.0705	CON__P04264	CON__P04264	224	240	yes	yes	3	1.0279E-05	115.8	1	1		12831000	9392700	3438300	0
TIDDLKNQILNLTTDNANILLQIDNAR	RDYSKYYKTIDDLKNQ	LLQIDNARLAADDFRL	K	T	I	A	R	L	2	1	5	4	0	2	0	0	0	4	5	1	0	0	0	0	3	0	0	0	0	27	1	3051.62	CON__P13645	CON__P13645	202	228	yes	yes	3	0.051132	40.625	1	1		12101000	7548500	4552300	0
TIEIEGLR	YRRQLQARTIEIEGLR	TIEIEGLRGANESLER	R	T	I	L	R	G	0	1	0	0	0	0	2	1	0	2	1	0	0	0	0	0	1	0	0	0	0	8	0	929.5182	Q08DH7	Q08DH7	323	330	yes	yes	2	0.00089043	155.75	1	1	1	111550000	59698000	24448000	27403000
TIGGGDDSFNTFFSETGAGK	DGQMPSDKTIGGGDDS	FSETGAGKHVPRAVFV	K	T	I	G	K	H	1	0	1	2	0	0	1	5	0	1	0	1	0	3	0	2	3	0	0	0	0	20	0	2006.8858	Q2HJ86;F2Z4C1;F6RP72;F2Z4K0;Q32KN8;Q3ZCJ7;F1MNF8	Q2HJ86	41	60	no	no	2	0.0039214	70.094	1	1	1	72987000	35056000	16584000	21347000
TIQLLPEQDK	IAGGQAGRTIQLLPEQ	QLLPEQDKAIVLETVE	R	T	I	D	K	A	0	0	0	1	0	2	1	0	0	1	2	1	0	0	1	0	1	0	0	0	0	10	0	1183.6449	F1N3M8;G3MYP5	G3MYP5	1080	1089	no	no	1;2	7.4405E-05	160.77	1	1	2	52343000	22781000	11968000	17594000
TIRPMDIETIEGSVMK	ECEVINLRTIRPMDIE	TIEGSVMKTNHLVTVE	R	T	I	M	K	T	0	1	0	1	0	0	2	1	0	3	0	1	2	0	1	1	2	0	0	1	0	16	1	1818.922	P11966	P11966	270	285	yes	yes	3	0.057382	59.673		1		0	0	0	0
TKVEAPK	AISSKIQKTKVEAPKL	KTKVEAPKLKVQHKFV	K	T	K	P	K	L	1	0	0	0	0	0	1	0	0	0	0	2	0	0	1	0	1	0	0	1	0	7	1	771.44905	F1MDZ2;O77788	F1MDZ2	440	446	yes	no	2	0.0091773	128.61	1	1	1	25562000	15408000	6171000	3983300
TLFSNIVLSGGSTLFK	KSDMDLRRTLFSNIVL	SGGSTLFKGFGDRLLS	R	T	L	F	K	G	0	0	1	0	0	0	0	2	0	1	3	1	0	2	0	3	2	0	0	1	0	16	0	1682.9243	F2Z4F0	F2Z4F0	293	308	yes	yes	2	5.8741E-08	147.64	1	1	1	12732000	8253400	3354000	1124600
TLLDIDNTR	DLTVGNNKTLLDIDNT	LLDIDNTRMTLDDFRI	K	T	L	T	R	M	0	1	1	2	0	0	0	0	0	1	2	0	0	0	0	0	2	0	0	0	0	9	0	1059.556	CON__P35527	CON__P35527	225	233	yes	yes	2	9.9393E-05	185.6	1	1	1	27951000	12123000	7149200	8678800
TLLEGEESR	DLEIATYRTLLEGEES	LLEGEESRMSGECAPN	R	T	L	S	R	M	0	1	0	0	0	0	3	1	0	0	2	0	0	0	0	1	1	0	0	0	0	9	0	1032.5088	CON__P04264	CON__P04264	484	492	no	no	2	0.00039478	155.84	1	1	1	61382000	32487000	17795000	11100000
TLQIFNIEMK	VIALKAGKTLQIFNIE	QIFNIEMKSKMKAHTM	K	T	L	M	K	S	0	0	1	0	0	1	1	0	0	2	1	1	1	1	0	0	1	0	0	0	0	10	0	1235.6584	P49951;F1MPU0	P49951	87	96	yes	no	2	0.0010029	114.89	4	2	4	210240000	79877000	66208000	64157000
TNAENEFVTIK	YEDEINKRTNAENEFV	ENEFVTIKKDVDGAYM	R	T	N	I	K	K	1	0	2	0	0	0	2	0	0	1	0	1	0	1	0	0	2	0	0	1	0	11	0	1264.6299	CON__P04264	CON__P04264	278	288	yes	yes	2	8.8942E-06	143.22	1	1	1	63664000	34824000	13383000	15457000
TNAENEFVTIKK	YEDEINKRTNAENEFV	NEFVTIKKDVDGAYMT	R	T	N	K	K	D	1	0	2	0	0	0	2	0	0	1	0	2	0	1	0	0	2	0	0	1	0	12	1	1392.7249	CON__P04264	CON__P04264	278	289	yes	yes	2;3	1.5337E-07	177.83	2	2	2	125790000	69298000	33380000	23115000
TNEKEQLQGLNDR	TNEYKIIRTNEKEQLQ	QLQGLNDRFAVFIEKV	R	T	N	D	R	F	0	1	2	1	0	2	2	1	0	0	2	1	0	0	0	0	1	0	0	0	0	13	1	1543.759	Q08DH7	Q08DH7	92	104	yes	yes	2;3	1.7865E-44	306.07	2	3	2	498230000	321730000	80509000	95988000
TPAFAESVTEGDVR	KDDVITVKTPAFAESV	SVTEGDVRWEKAVGDT	K	T	P	V	R	W	2	1	0	1	0	0	2	1	0	0	0	0	0	1	1	1	2	0	0	2	0	14	0	1477.7049	P11179;F1MEQ3	P11179	76	89	yes	no	2	0.00015558	89.624	1			0	0	0	0
TPDTIR	NAPKGILRTPDTIRRF	LRTPDTIRRFQSVPAQ	R	T	P	I	R	R	0	1	0	1	0	0	0	0	0	1	0	0	0	0	1	0	2	0	0	0	0	6	0	701.3708	P49951;F1MPU0	P49951	394	399	yes	no	2	0.0034349	166.22	1	1	1	1054200000	555050000	297480000	201720000
TPDTIRR	NAPKGILRTPDTIRRF	RTPDTIRRFQSVPAQP	R	T	P	R	R	F	0	2	0	1	0	0	0	0	0	1	0	0	0	0	1	0	2	0	0	0	0	7	1	857.47191	P49951;F1MPU0	P49951	394	400	yes	no	2	0.04087	123.45	1	1		253270000	164490000	88777000	0
TPDVSGYYYEK	EAYEKTTRTPDVSGYY	VSGYYYEKTESVTKSP	R	T	P	E	K	T	0	0	0	1	0	0	1	1	0	0	0	1	0	0	1	1	1	0	3	1	0	11	0	1320.5874	F1N1S2	F1N1S2	1893	1903	yes	yes	2	0.00013522	135.15		1	1	8381300	0	4986500	3394800
TPEVSAYSYEK	EISEKTIRTPEVSAYS	VSAYSYEKAERSRRLL	R	T	P	E	K	A	1	0	0	0	0	0	2	0	0	0	0	1	0	0	1	2	1	0	2	1	0	11	0	1272.5874	F1N1S2	F1N1S2	1961	1971	yes	yes	2	4.419E-06	153.34	1	1	1	14576000	7704400	3772900	3098300
TPGDFSYAYEKPETTTR	MEEDTGGKTPGDFSYA	EKPETTTRSPDEEGYD	K	T	P	T	R	S	1	1	0	1	0	0	2	1	0	0	0	1	0	1	2	1	4	0	2	0	0	17	1	1961.9007	F1N1S2	F1N1S2	1859	1875	yes	yes	3	2.2073E-08	149.73	1	1	1	26358000	12813000	5773300	7771500
TPHTPGTPK	PGTPSYPRTPHTPGTP	PHTPGTPKSAILVPSE	R	T	P	P	K	S	0	0	0	0	0	0	0	1	1	0	0	1	0	0	3	0	3	0	0	0	0	9	0	934.48723	F1MEW3	F1MEW3	1633	1641	yes	yes	2;3	0.00018683	157.34	2	2	2	81386000	46824000	20240000	14322000
TPPKSPATPK	EKKVAIIRTPPKSPAT	PKSPATPKQLRLINQP	R	T	P	P	K	Q	1	0	0	0	0	0	0	0	0	0	0	2	0	0	4	1	2	0	0	0	0	10	1	1022.576	F1MEW3	F1MEW3	1657	1666	yes	yes	3	0.0020065	120.77	1	1	1	14499000	8205600	3600400	2692600
TPVEAASSDQSSEATKAPGLR	PEGPTAPRTPVEAASS	ATKAPGLRGPGVMPPL	R	T	P	L	R	G	4	1	0	1	0	1	2	1	0	0	1	1	0	0	2	4	2	0	0	1	0	21	1	2101.0287	E1BP30;F1MQZ0	E1BP30	474	494	yes	no	3	5.3765E-09	150.69	1			4063300	4063300	0	0
TPVIDADKPVSSQLR	NSLAFIKRTPVIDADK	KPVSSQLRVLTLSEDS	R	T	P	L	R	V	1	1	0	2	0	1	0	0	0	1	1	1	0	0	2	2	1	0	0	2	0	15	1	1624.8784	E1BDX8	E1BDX8	121	135	yes	yes	2;3	2.938E-11	207.31	1	2	2	24550000	13474000	6443000	4632500
TPVSITEHPK	GEEVVMFKTPVSITEH	VSITEHPKINEWLTLV	K	T	P	P	K	I	0	0	0	0	0	0	1	0	1	1	0	1	0	0	2	1	2	0	0	1	0	10	0	1107.5924	E1BDX8	E1BDX8	1688	1697	yes	yes	3	0.017812	63.694			1	2023000	0	0	2023000
TQETPSAQMEGFLNR	SAATLPARTQETPSAQ	QMEGFLNRKHEWEAHN	R	T	Q	N	R	K	1	1	1	0	0	2	2	1	0	0	1	0	1	1	1	1	2	0	0	0	0	15	0	1707.7886	F1MYC9	F1MYC9	2191	2205	yes	yes	2	0.00017724	123.72	1	1	1	0	0	0	0
TQILAASYELHK	LLELIDTRTQILAASY	AASYELHKFYHDAKEI	R	T	Q	H	K	F	2	0	0	0	0	1	1	0	1	1	2	1	0	0	0	1	1	0	1	0	0	12	0	1372.7351	F1MYC9	F1MYC9	1797	1808	yes	yes	2	6.3873E-05	134.18	1	1	1	26424000	14839000	6369800	5215000
TQTAIASEDMPNTLTEAEK	DFQSWLSRTQTAIASE	NTLTEAEKLLTQHENI	R	T	Q	E	K	L	3	0	1	1	0	1	3	0	0	1	1	1	1	0	1	1	4	0	0	0	0	19	0	2048.9572	F1MYC9	F1MYC9	1081	1099	yes	yes	2	0.00047108	97.621			1	0	0	0	0
TQYEAVASSNMHEAEEWYR	TAALREIRTQYEAVAS	HEAEEWYRSKFADLND	R	T	Q	Y	R	S	3	1	1	0	0	1	4	0	1	0	0	0	1	0	0	2	1	1	2	1	0	19	0	2299.9804	Q28115	Q28115	236	254	yes	yes	2;3	1.4877E-13	184.83	3	3	2	0	0	0	0
TRVMEYINR	LTAIKADRTRVMEYIN	RVMEYINRLDNYDAPD	R	T	R	N	R	L	0	2	1	0	0	0	1	0	0	1	0	0	1	0	0	0	1	0	1	1	0	9	1	1180.6023	P49951;F1MPU0	P49951	1038	1046	yes	no	2;3	0.0098598	108.47	2	2	2	0	0	0	0
TSIDAYDNFDNISLAQR	EEDYQALRTSIDAYDN	DNISLAQRLEKHELIE	R	T	S	Q	R	L	2	1	2	3	0	1	0	0	0	2	1	0	0	1	0	2	1	0	1	0	0	17	0	1941.9068	P49951;F1MPU0	P49951	1482	1498	yes	no	2;3	2.0561E-11	162.29	5	5	6	4451400000	2004400000	1110900000	1336000000
TSIDAYDNFDNISLAQRLEK	EEDYQALRTSIDAYDN	SLAQRLEKHELIEFRR	R	T	S	E	K	H	2	1	2	3	0	1	1	0	0	2	2	1	0	1	0	2	1	0	1	0	0	20	1	2312.1285	P49951;F1MPU0	P49951	1482	1501	yes	no	2;3	1.2714E-11	167.97	1	2	2	33678000	13431000	9541500	10706000
TSIDAYDNFDNISLAQRLEKHELIEFR	EEDYQALRTSIDAYDN	KHELIEFRRIAAYLFK	R	T	S	F	R	R	2	2	2	3	0	1	3	0	1	3	3	1	0	2	0	2	1	0	1	0	0	27	2	3236.6102	P49951;F1MPU0	P49951	1482	1508	yes	no	4	0.010935	85.185	1	1	1	45528000	24150000	10476000	10902000
TSLQELGEPQKEEVLQIPDR	EALPGDLRTSLQELGE	EVLQIPDRGLSPEEAE	R	T	S	D	R	G	0	1	0	1	0	3	4	1	0	1	3	1	0	0	2	1	1	0	0	1	0	20	1	2308.1911	F1N3M8;G3MYP5	G3MYP5	1117	1136	no	no	2;3	7.8925E-35	270.08	2	2	2	177370000	99434000	38606000	39331000
TSQNSELNNMQDLVEDYKK	LDGLTAERTSQNSELN	DLVEDYKKKYEDEINK	R	T	S	K	K	K	0	0	3	2	0	2	2	0	0	0	2	2	1	0	0	2	1	0	1	1	0	19	1	2255.0376	CON__P35908	CON__P35908	254	272	yes	yes	3	1.1467E-09	156.13	1	1	2	4465100	0	0	4465100
TSVSSVSASPSR	SGFHSWARTSVSSVSA	SVSASPSRFRGAGTTS	R	T	S	S	R	F	1	1	0	0	0	0	0	0	0	0	0	0	0	0	1	6	1	0	0	2	0	12	0	1163.5782	F1MSQ6	F1MSQ6	52	63	yes	yes	2	1.4133E-07	197.07	1	1	1	121380000	59182000	35865000	26334000
TTAAGAESAQAPSVFK	HLSCVKRKTTAAGAES	AQAPSVFKQAKDKVSD	K	T	T	F	K	Q	5	0	0	0	0	1	1	1	0	0	0	1	0	1	1	2	2	0	0	1	0	16	0	1534.7627	F1MEW3	F1MEW3	1515	1530	yes	yes	2	6.2355E-08	150.37	1	1	1	114050000	54896000	35636000	23520000
TTELETLK	YRRQLQARTTELETLK	TTELETLKSTKDSLER	R	T	T	L	K	S	0	0	0	0	0	0	2	0	0	0	2	1	0	0	0	0	3	0	0	0	0	8	0	933.50188	F1MSQ6	F1MSQ6	323	330	yes	yes	2	0.0015251	122.52	1	1	1	132490000	76662000	32614000	23214000
TTGIVMDSGDGVTHTVPIYEGYALPHAILR	LSLYASGRTTGIVMDS	ALPHAILRLDLAGRDL	R	T	T	L	R	L	2	1	0	2	0	0	1	4	2	3	2	0	1	0	2	1	4	0	2	3	0	30	0	3182.607	P63258;P60712;F1MRD0	P63258	148	177	yes	no	3	0.004115	80.664	1		1	0	0	0	0
TTMLLSK	ALLEEYNKTTMLLSKQ	KTTMLLSKQFVQWDEL	K	T	T	S	K	Q	0	0	0	0	0	0	0	0	0	0	2	1	1	0	0	1	2	0	0	0	0	7	0	792.44153	Q0P5A1	Q0P5A1	157	163	yes	yes	2	0.054309	49.423	1			0	0	0	0
TTPSYVAFTDTER	IANDQGNRTTPSYVAF	VAFTDTERLIGDAAKN	R	T	T	E	R	L	1	1	0	1	0	0	1	0	0	0	0	0	0	1	1	1	4	0	1	1	0	13	0	1486.694	Q27975;Q27965;P0CB32;P19120	P19120	37	49	no	no	2	4.3123E-07	163.51	1	1	1	61716000	34777000	15761000	11179000
TTSGTPPDSSLVTYELHSRPEQDKFSQAAK	KGTGSGGKTTSGTPPD	DKFSQAAKVAELEKRL	K	T	T	A	K	V	2	1	0	2	0	2	2	1	1	0	2	2	0	1	3	5	4	0	1	1	0	30	2	3276.5899	Q3ZCF0	Q3ZCF0	196	225	yes	yes	5	0.050172	117.83	1			22860000	22860000	0	0
TVEMRDGEVIK	LKRNIVVKTVEMRDGE	MRDGEVIKESKQEHKD	K	T	V	I	K	E	0	1	0	1	0	0	2	1	0	1	0	1	1	0	0	0	1	0	0	2	0	11	1	1275.6493	Q28115	Q28115	408	418	yes	yes	2	0.026747	85.554	1	1	1	0	0	0	0
TVENIKDPLFR	QTLSHLKRTVENIKDP	NIKDPLFRFFEREVKM	R	T	V	F	R	F	0	1	1	1	0	0	1	0	0	1	1	1	0	1	1	0	1	0	0	1	0	11	1	1330.7245	E1BDX8	E1BDX8	4401	4411	yes	yes	3	0.00010626	136.02	1		1	7487900	4734100	0	2753800
TVTNAVVTVPAYFNDSQR	IAEAYLGKTVTNAVVT	AYFNDSQRQATKDAGT	K	T	V	Q	R	Q	2	1	2	1	0	1	0	0	0	0	0	0	0	1	1	1	3	0	1	4	0	18	0	1980.9905	P19120	P19120	138	155	yes	yes	2	0.0011674	74.732			1	11578000	0	0	11578000
TWEDTSPEQEDTYWR	GEQKEPARTWEDTSPE	EQEDTYWRGREDVVLE	R	T	W	W	R	G	0	1	0	2	0	1	3	0	0	0	0	0	0	0	1	1	3	2	1	0	0	15	0	1941.8017	F1N3M8;G3MYP5	G3MYP5	1677	1691	no	no	2	2.2139E-12	183.81	1	1	1	44270000	18025000	13978000	12266000
VAANAPK	GNYSEAAKVAANAPKG	KVAANAPKGILRTPDT	K	V	A	P	K	G	3	0	1	0	0	0	0	0	0	0	0	1	0	0	1	0	0	0	0	1	0	7	0	669.38097	P49951;F1MPU0	P49951	383	389	yes	no	2	0.028981	92.692	1	1	1	98463000	45698000	29002000	23763000
VADEAFYK	QKTKANNRVADEAFYK	VADEAFYKQPFADVIG	R	V	A	Y	K	Q	2	0	0	1	0	0	1	0	0	0	0	1	0	1	0	0	0	0	1	1	0	8	0	941.44945	P04973	P04973	158	165	yes	yes	2	0.0067055	106.04	1	2	1	839360000	432290000	241980000	165090000
VAELEEEQSQGSSSYSDWVK	INGLLQRKVAELEEEQ	SSYSDWVKNLISPELG	K	V	A	V	K	N	1	0	0	1	0	2	4	1	0	0	1	1	0	0	0	5	0	1	1	2	0	20	0	2257.0023	F1N3M8;G3MYP5	G3MYP5	106	125	no	no	2	1.4259E-05	106.75	1	1	1	32346000	14433000	8819400	9093200
VANVELYYR	QFKDIITKVANVELYY	ANVELYYRAIQFYLEF	K	V	A	Y	R	A	1	1	1	0	0	0	1	0	0	0	1	0	0	0	0	0	0	0	2	2	0	9	0	1125.5819	P49951;F1MPU0	P49951	1398	1406	yes	no	2	0.00010879	169.12	1	1	1	1679000000	857560000	451450000	369990000
VAPEEHPVLLTEAPLNPK	HTFYNELRVAPEEHPV	TEAPLNPKANREKMTQ	R	V	A	P	K	A	2	0	1	0	0	0	3	0	1	0	3	1	0	0	4	0	1	0	0	2	0	18	0	1953.0571	P63258;P60712;F1MRD0	P63258	96	113	yes	no	2;3	1.6677E-06	126.07	2	2	2	224470000	140500000	52021000	31948000
VASNPYTWFTMEALEETWR	DRQIKSFRVASNPYTW	EALEETWRNLQKIIKE	R	V	A	W	R	N	2	1	1	0	0	0	3	0	0	0	1	0	1	1	1	1	3	2	1	1	0	19	0	2330.0678	E1BFB0	E1BFB0	2162	2180	yes	yes	2	0.0010949	96.391	1	1		0	0	0	0
VATHLSTPQGLR	LSLPITAKVATHLSTP	LSTPQGLRFKTITETT	K	V	A	L	R	F	1	1	0	0	0	1	0	1	1	0	2	0	0	0	1	1	2	0	0	1	0	12	0	1278.7044	E1BKN2	E1BKN2	411	422	yes	yes	2;3	7.2514E-07	177.04	2	2	2	76660000	44799000	16506000	15356000
VAVVNQIAR	EMNNQASRVAVVNQIA	AVVNQIARQLMHSGHP	R	V	A	A	R	Q	2	1	1	0	0	1	0	0	0	1	0	0	0	0	0	0	0	0	0	3	0	9	0	968.57671	F1MYC9	F1MYC9	905	913	yes	yes	2	0.0013715	120.46		1	1	5809500	0	2977000	2832500
VDFSLAGALNSGFK	MPPPLPARVDFSLAGA	GALNSGFKETRASERA	R	V	D	F	K	E	2	0	1	1	0	0	0	2	0	0	2	1	0	2	0	2	0	0	0	1	0	14	0	1424.73	Q28115	Q28115	46	59	yes	yes	2	1.7771E-10	185.95	3	3	3	93263000	44207000	26354000	22703000
VDHGAEIITQSPGR	FREHAKARVDHGAEII	IITQSPGRSSVASPRR	R	V	D	G	R	S	1	1	0	1	0	1	1	2	1	2	0	0	0	0	1	1	1	0	0	1	0	14	0	1478.7478	F1MEW3	F1MEW3	1780	1793	yes	yes	2;3	6.5733E-13	226.06	2	2	2	113870000	51109000	36905000	25858000
VDKLDASESLR	VMKEYLTKVDKLDASE	LDASESLRKEEEQATE	K	V	D	L	R	K	1	1	0	2	0	0	1	0	0	0	2	1	0	0	0	2	0	0	0	1	0	11	1	1231.6408	P49951;F1MPU0	P49951	1610	1620	yes	no	2;3	1.562E-06	176.18	2	2	3	2469000000	1109500000	839330000	520150000
VDKLDASESLRK	VMKEYLTKVDKLDASE	DASESLRKEEEQATET	K	V	D	R	K	E	1	1	0	2	0	0	1	0	0	0	2	2	0	0	0	2	0	0	0	1	0	12	2	1359.7358	P49951;F1MPU0	P49951	1610	1621	yes	no	2;3;4	6.0236E-06	196.38	3	3	3	578020000	351920000	120090000	106010000
VDLLNQEIEFLK	IKVELQSKVDLLNQEI	NQEIEFLKVLYDAEIS	K	V	D	L	K	V	0	0	1	1	0	1	2	0	0	1	3	1	0	1	0	0	0	0	0	1	0	12	0	1459.7922	CON__P35908	CON__P35908	309	320	yes	yes	2	2.6515E-06	148.96	1	1	1	54992000	28567000	12623000	13802000
VDLQAK	VDGAYMTKVDLQAKLD	TKVDLQAKLDNLQQEI	K	V	D	A	K	L	1	0	0	1	0	1	0	0	0	0	1	1	0	0	0	0	0	0	0	1	0	6	0	672.38064	CON__P04264	CON__P04264	299	304	no	no	2	0.05615	77.748		1		3255000	0	3255000	0
VDPEIQNVK	LLQPLNVKVDPEIQNV	DPEIQNVKAQEREQIK	K	V	D	V	K	A	0	0	1	1	0	1	1	0	0	1	0	1	0	0	1	0	0	0	0	2	0	9	0	1040.5502	CON__P35908;E1B991;G3MZ71	CON__P35908	173	181	no	no	2	0.032199	79.986		1		8718600	0	8718600	0
VDTVNHMADELINSGHSDAATIAEWK	TGNIGQERVDTVNHMA	AATIAEWKDGLNEAWA	R	V	D	W	K	D	4	0	2	3	0	0	2	1	2	2	1	1	1	0	0	2	2	1	0	2	0	26	0	2823.3134	F1MYC9	F1MYC9	1754	1779	yes	yes	3	5.3912E-09	129.27	1	1		0	0	0	0
VEEHEETFEEK	KSVTVTQKVEEHEETF	HEETFEEKLVSTKKVE	K	V	E	E	K	L	0	0	0	0	0	0	6	0	1	0	0	1	0	1	0	0	1	0	0	1	0	11	0	1404.6045	F1MDZ2;O77788	F1MDZ2	893	903	yes	no	2	1.0972E-12	234.3	1	1	1	86330000	48815000	19537000	17978000
VEEPQKDQPDK	ATAKDSSKVEEPQKDQ	PQKDQPDKIAEAPASE	K	V	E	D	K	I	0	0	0	2	0	2	2	0	0	0	0	2	0	0	2	0	0	0	0	1	0	11	1	1311.6307	F1MEW3	F1MEW3	368	378	yes	yes	2	1.8162E-06	169.82	1			4022400	4022400	0	0
VEEPQKDQPDKIAEAPASEAVAAPK	ATAKDSSKVEEPQKDQ	SEAVAAPKDAHVSIVE	K	V	E	P	K	D	6	0	0	2	0	2	4	0	0	1	0	3	0	0	4	1	0	0	0	2	0	25	2	2617.3235	F1MEW3	F1MEW3	368	392	yes	yes	3;4	0.0038222	108.44	2	2	2	138020000	91966000	26847000	19207000
VEEVGGKEEGGLK	EKEKEKEKVEEVGGKE	GKEEGGLKESRKEDIA	K	V	E	L	K	E	0	0	0	0	0	0	4	4	0	0	1	2	0	0	0	0	0	0	0	2	0	13	1	1329.6776	F1MDZ2;O77788	F1MDZ2	792	804	yes	no	3	0.00054182	122.39	1			4808500	4808500	0	0
VEGVGVVTSAELDMPFYEDK	KVADKDHKVEGVGVVT	DMPFYEDKSGMSKYFE	K	V	E	D	K	S	1	0	0	2	0	0	3	2	0	0	1	1	1	1	1	1	1	0	1	4	0	20	0	2184.0297	F1MEW3	F1MEW3	550	569	yes	yes	2	0.0045585	77.27		1		0	0	0	0
VEKPEK	EELAAEAKVEKPEKAK	AKVEKPEKAKSPVAKS	K	V	E	E	K	A	0	0	0	0	0	0	2	0	0	0	0	2	0	0	1	0	0	0	0	1	0	6	1	728.40685	F1MDZ2;O77788	F1MDZ2	612	617	yes	no	2	0.044591	88.734		1	1	64654	0	39444	25210
VESLLDELAFVR	ARLDLEKKVESLLDEL	LDELAFVRQVHDEEVA	K	V	E	V	R	Q	1	1	0	1	0	0	2	0	0	0	3	0	0	1	0	1	0	0	0	2	0	12	0	1389.7504	Q08DH7	Q08DH7	217	228	yes	yes	2	2.3664E-06	153.54	1	1	1	16708000	9731300	3677700	3299200
VEVRPMMYVALTYDHR	RPVVIGGKVEVRPMMY	VALTYDHRLIDGREAV	K	V	E	H	R	L	1	2	0	1	0	0	1	0	1	0	1	0	2	0	1	0	1	0	2	3	0	16	1	1978.9757	P11179;F1MEQ3	P11179	412	427	yes	no	3	0.0070499	88.427	1	1		0	0	0	0
VGALDLAVLDQVEAR	TVELLQAKVGALDLAV	VLDQVEARLQSVLGKV	K	V	G	A	R	L	3	1	0	2	0	1	1	1	0	0	3	0	0	0	0	0	0	0	0	3	0	15	0	1567.857	Q3ZCF0	Q3ZCF0	270	284	yes	yes	2	1.0484E-07	144.18			1	7770200	0	0	7770200
VGELFQR	QRHAEPSRVGELFQRE	RVGELFQRELRDLRAQ	R	V	G	Q	R	E	0	1	0	0	0	1	1	1	0	0	1	0	0	1	0	0	0	0	0	1	0	7	0	847.4552	Q08DH7	Q08DH7	139	145	yes	yes	2	0.0051299	131.04	1	1	1	214140000	117740000	46014000	50390000
VGEQAQVVIIDMNDPSNPIR	KFICIREKVGEQAQVV	NDPSNPIRRPISADSA	K	V	G	I	R	R	1	1	2	2	0	2	1	1	0	3	0	0	1	0	2	1	0	0	0	3	0	20	0	2194.1052	P49951;F1MPU0	P49951	44	63	yes	no	2;3	4.2094E-06	119.38	2	2	3	138780000	64401000	45695000	28684000
VGEQAQVVIIDMNDPSNPIRR	KFICIREKVGEQAQVV	DPSNPIRRPISADSAI	K	V	G	R	R	P	1	2	2	2	0	2	1	1	0	3	0	0	1	0	2	1	0	0	0	3	0	21	1	2350.2063	P49951;F1MPU0	P49951	44	64	yes	no	3	0.020824	67.928	1	1	1	0	0	0	0
VGFGNLEDEFWLGLDNIHR	FRKWAEYRVGFGNLED	LGLDNIHRITSQGRYE	R	V	G	H	R	I	0	1	2	2	0	0	2	3	1	1	3	0	0	2	0	0	0	1	0	1	0	19	0	2230.0807	E1BKN2	E1BKN2	1199	1217	yes	yes	3	2.5507E-18	194.05	1	1	1	42616000	24340000	12019000	6256800
VGINYQPPTVVPGGDLAK	DWCPTGFKVGINYQPP	VPGGDLAKVQRAVCML	K	V	G	A	K	V	1	0	1	1	0	1	0	3	0	1	1	1	0	0	3	0	1	0	1	3	0	18	0	1823.9781	Q2HJ86;F2Z4C1;F6RP72;F2Z4K0;Q32KN8;Q3ZCJ7;F1MNF8	Q2HJ86	353	370	no	no	2	0.056776	54.764			1	41133000	0	0	41133000
VGSLDNAHHVPGGGNVK	FKEKAQAKVGSLDNAH	VPGGGNVKIDSQKLNF	K	V	G	V	K	I	1	0	2	1	0	0	0	4	2	0	1	1	0	0	1	1	0	0	0	3	0	17	0	1656.8332	F1MEW3	F1MEW3	1748	1764	yes	yes	2;3;4	2.7816E-17	241.64	3	3	3	293500000	210030000	47533000	35931000
VGYTPDWIFLLR	KIVLYAKKVGYTPDWI	PDWIFLLRNVMRISPD	K	V	G	L	R	N	0	1	0	1	0	0	0	1	0	1	2	0	0	1	1	0	1	1	1	1	0	12	0	1478.7922	P49951;F1MPU0	P49951	508	519	yes	no	2	5.2297E-09	202.03	1	1	1	315640000	219350000	76706000	19578000
VHELEQQNK	RFASFIERVHELEQQN	HELEQQNKVLEAELLV	R	V	H	N	K	V	0	0	1	0	0	2	2	0	1	0	1	1	0	0	0	0	0	0	0	1	0	9	0	1123.5622	P02548	P02548	108	116	yes	yes	2;3	3.6951E-05	195.48	2	2	2	318650000	166760000	93139000	58751000
VHLENMGSHDIVDGNHR	LQFLKEQRVHLENMGS	DIVDGNHRLTLGLIWT	R	V	H	H	R	L	0	1	2	2	0	0	1	2	3	1	1	0	1	0	0	1	0	0	0	2	0	17	0	1928.8911	F1MYC9;F1MKE9;E1BMN5	F1MYC9	128	144	yes	no	3;4	8.9472E-07	133.87	2	1	1	0	0	0	0
VHQLYETIQR	EDADTQSKVHQLYETI	QLYETIQRWSPIAASL	K	V	H	Q	R	W	0	1	0	0	0	2	1	0	1	1	1	0	0	0	0	0	1	0	1	1	0	10	0	1285.6779	Q3ZCF0	Q3ZCF0	311	320	yes	yes	2;3	3.9539E-05	176.33	2	2	2	27273000	14935000	7172300	5165700
VHYLEQQNK	RFAGYIEKVHYLEQQN	HYLEQQNKEIEAEIQA	K	V	H	N	K	E	0	0	1	0	0	2	1	0	1	0	1	1	0	0	0	0	0	0	1	1	0	9	0	1157.5829	F1MDZ2;O77788	F1MDZ2	119	127	yes	no	2;3	0.00023992	166.09	2	2	2	360890000	198640000	72546000	89700000
VIQCFAETGQVQK	LRANVPNKVIQCFAET	AETGQVQKIVLYAKKV	K	V	I	Q	K	I	1	0	0	0	1	3	1	1	0	1	0	1	0	1	0	0	1	0	0	2	0	13	0	1449.7286	P49951;F1MPU0	P49951	488	500	yes	no	2	5.5982E-07	102.73		1	1	9333900	0	0	9333900
VIQQSLEQEETEHK	IDMTYQLKVIQQSLEQ	EQEETEHKATKARLAD	K	V	I	H	K	A	0	0	0	0	0	3	4	0	1	1	1	1	0	0	0	1	1	0	0	1	0	14	0	1696.8268	F1N319;Q28021	F1N319	649	662	yes	no	3	5.2557E-08	139.48	1			4077400	4077400	0	0
VKDDIESLHDKFK	YQTQLIQRVKDDIESL	ESLHDKFKVQYPQSQA	R	V	K	F	K	V	0	0	0	3	0	0	1	0	1	1	1	3	0	1	0	1	0	0	0	1	0	13	2	1572.8148	E1BDX8	E1BDX8	611	623	yes	yes	3;4	0.0039739	103.76	2	1	1	29318000	20775000	5854100	2689100
VKDEVSAEK	VKLAAAGRVKDEVSAE	KDEVSAEKEASPPISG	R	V	K	E	K	E	1	0	0	1	0	0	2	0	0	0	0	2	0	0	0	1	0	0	0	2	0	9	1	1003.5186	F1MEW3	F1MEW3	928	936	yes	yes	2	0.00068267	141.1	1	1	1	34296000	17843000	11096000	5357300
VKIESVK	RHRPGGGRVKIESVKL	RVKIESVKLDFKEKAQ	R	V	K	V	K	L	0	0	0	0	0	0	1	0	0	1	0	2	0	0	0	1	0	0	0	2	0	7	1	801.496	F1MEW3	F1MEW3	1731	1737	yes	yes	2	0.010888	113.5	1	1	1	19632000	10883000	4829800	3919800
VKNFLK	SNCYDPERVKNFLKEA	ERVKNFLKEAKLTDQL	R	V	K	L	K	E	0	0	1	0	0	0	0	0	0	0	1	2	0	1	0	0	0	0	0	1	0	6	1	747.46431	P49951;F1MPU0	P49951	759	764	yes	no	2	0.046403	87.582	1			14880000	14880000	0	0
VKQLPLVKPYLR	RAVNYFSKVKQLPLVK	PLVKPYLRSVQNHNNK	K	V	K	L	R	S	0	1	0	0	0	1	0	0	0	0	3	2	0	0	2	0	0	0	1	2	0	12	2	1452.9181	P49951;F1MPU0	P49951	1442	1453	yes	no	3	0.00079725	133.42	1			13931000	13931000	0	0
VKTESSEALK	EKPAKPERVKTESSEA	TESSEALKAEKRKLIK	R	V	K	L	K	A	1	0	0	0	0	0	2	0	0	0	1	2	0	0	0	2	1	0	0	1	0	10	1	1090.587	F1N3M8;G3MYP5	G3MYP5	380	389	no	no	2;3	0.00021976	141.89	2	2	2	60194000	34507000	15500000	10187000
VKTESSEALKAEK	EKPAKPERVKTESSEA	SEALKAEKRKLIKDKV	R	V	K	E	K	R	2	0	0	0	0	0	3	0	0	0	1	3	0	0	0	2	1	0	0	1	0	13	2	1418.7617	F1N3M8;G3MYP5	G3MYP5	380	392	no	no	3	3.2708E-07	167.89	1	1	1	34668000	19923000	8875700	5869300
VLEAELLVLR	HELEQQNKVLEAELLV	EAELLVLRQKHSEPSR	K	V	L	L	R	Q	1	1	0	0	0	0	2	0	0	0	4	0	0	0	0	0	0	0	0	2	0	10	0	1153.7071	P02548	P02548	117	126	yes	yes	2	0.00010553	151.22	1	1	1	323330000	163210000	91647000	68472000
VLETAEDIQER	________________	TAEDIQERRQQVLDRY	K	V	L	E	R	R	1	1	0	1	0	1	3	0	0	1	1	0	0	0	0	0	1	0	0	1	0	11	0	1301.6463	E1BFB0	E1BFB0	8	18	yes	yes	2	3.2392E-06	159.94	1	1	1	33475000	18863000	8409100	6203300
VLFPGNAPQNK	NPTEKIVRVLFPGNAP	PGNAPQNKILEGLEKL	R	V	L	N	K	I	1	0	2	0	0	1	0	1	0	0	1	1	0	1	2	0	0	0	0	1	0	11	0	1183.635	F1N3M8;G3MYP5	G3MYP5	265	275	no	no	2	1.3504E-05	144.77	1	1	1	74700000	41263000	20489000	12948000
VLFPGNSTQYNILEGLEK	NPAEKIIRVLFPGNST	NILEGLEKLKHLDFLK	R	V	L	E	K	L	0	0	2	0	0	1	2	2	0	1	3	1	0	1	1	1	1	0	1	1	0	18	0	2021.047	F1N1S2	F1N1S2	487	504	yes	yes	2	1.9556E-06	114.96	1	1	1	34037000	13023000	11514000	9500000
VLLTTQGVDMISK	GLPNNAEKVLLTTQGV	QGVDMISKMLKMQMLE	K	V	L	S	K	M	0	0	0	1	0	1	0	1	0	1	2	1	1	0	0	1	2	0	0	2	0	13	0	1403.7694	E1BDX8	E1BDX8	4330	4342	yes	yes	2	0.0003851	123.28	1	1	1	0	0	0	0
VLPAPGQESPIPDPK	PPEMARQRVLPAPGQE	ESPIPDPKLLPPMRDE	R	V	L	P	K	L	1	0	0	1	0	1	1	1	0	1	1	1	0	0	5	1	0	0	0	1	0	15	0	1543.8246	G3MYP5	G3MYP5	1817	1831	yes	yes	2	0.0010758	89.136	1	1	1	140100000	83188000	34363000	22550000
VLRPQVTAVAQQNQGEVPEPQDMK	QLRAVIVRVLRPQVTA	VPEPQDMKVAEVLFDA	R	V	L	M	K	V	2	1	1	1	0	5	2	1	0	0	1	1	1	0	3	0	1	0	0	4	0	24	1	2661.3544	E1BDX8	E1BDX8	482	505	yes	yes	3	0.033023	63.979	1	1	1	0	0	0	0
VMEQEWR	QELDAASKVMEQEWRE	KVMEQEWREKAKKDLE	K	V	M	W	R	E	0	1	0	0	0	1	2	0	0	0	0	0	1	0	0	0	0	1	0	1	0	7	0	976.44365	P04975;G3N252	P04975	122	128	yes	no	2	0.001015	178.65	2	2	2	15466000	8135400	4454900	2876100
VMEYINR	AIKADRTRVMEYINRL	RVMEYINRLDNYDAPD	R	V	M	N	R	L	0	1	1	0	0	0	1	0	0	1	0	0	1	0	0	0	0	0	1	1	0	7	0	923.45349	P49951;F1MPU0	P49951	1040	1046	yes	no	2	0.0026805	155.73	2	3	3	24306000	0	13904000	10402000
VMTEPTALSEK	MTTQTLEKVMTEPTAL	EPTALSEKIATQELFE	K	V	M	E	K	I	1	0	0	0	0	0	2	0	0	0	1	1	1	0	1	1	2	0	0	1	0	11	0	1204.6009	F1MEW3	F1MEW3	522	532	yes	yes	2	0.020622	102.4	1	1	1	0	0	0	0
VNEVNQFAAK	DMAAHEERVNEVNQFA	EVNQFAAKLIQEQHPE	R	V	N	A	K	L	2	0	2	0	0	1	1	0	0	0	0	1	0	1	0	0	0	0	0	2	0	10	0	1118.572	E1BFB0	E1BFB0	205	214	yes	yes	2	0.00034727	115.82	1			8176500	8176500	0	0
VNFLPEIITLSK	AGSVLKLKVNFLPEII	PEIITLSKEVRNLKWL	K	V	N	S	K	E	0	0	1	0	0	0	1	0	0	2	2	1	0	1	1	1	1	0	0	1	0	12	0	1372.7966	E1BDX8	E1BDX8	736	747	yes	yes	2	0.016001	77.644		1	1	3192200	0	1604600	1587600
VPLPSLSPTMQAGTIAR	YSLPPHQKVPLPSLSP	MQAGTIARWEKKEGEK	K	V	P	A	R	W	2	1	0	0	0	1	0	1	0	1	2	0	1	0	3	2	2	0	0	1	0	17	0	1737.9447	F1N690	F1N690	94	110	yes	yes	2	0.00011436	110.32	1	1	1	0	0	0	0
VPQIEVETHK	EWSPWQAKVPQIEVET	QIEVETHKVAAPDVVV	K	V	P	H	K	V	0	0	0	0	0	1	2	0	1	1	0	1	0	0	1	0	1	0	0	2	0	10	0	1178.6295	E1BDX8	E1BDX8	2552	2561	yes	yes	3	8.7382E-05	138.22	1		1	8940900	6812300	0	2128500
VQALEEANNDLENK	RLASYLDKVQALEEAN	ANNDLENKIQDWYDKK	K	V	Q	N	K	I	2	0	3	1	0	1	3	0	0	0	2	1	0	0	0	0	0	0	0	1	0	14	0	1585.7584	CON__P35527	CON__P35527	171	184	yes	yes	2	0.0018214	91.076	1	1	1	16180000	9417800	3720500	3041600
VQAVVAVAR	DIAAYEERVQAVVAVA	QAVVAVARELEAENYH	R	V	Q	A	R	E	3	1	0	0	0	1	0	0	0	0	0	0	0	0	0	0	0	0	0	4	0	9	0	911.55525	F1MYC9	F1MYC9	478	486	yes	yes	2	0.0037213	114.99	1			2448100	2448100	0	0
VQSLQDEVAFLR	VKVELDKKVQSLQDEV	QDEVAFLRSNHEEEVA	K	V	Q	L	R	S	1	1	0	1	0	2	1	0	0	0	2	0	0	1	0	1	0	0	0	2	0	12	0	1403.7409	F1MDZ2;O77788	F1MDZ2	224	235	yes	no	2	2.1489E-07	189.13	1	1	1	319560000	183970000	68917000	66674000
VQVEYK	VNDAGRPKVQVEYKGE	PKVQVEYKGETKSFYP	K	V	Q	Y	K	G	0	0	0	0	0	1	1	0	0	0	0	1	0	0	0	0	0	0	1	2	0	6	0	764.40685	P19120	P19120	103	108	no	no	2	0.010459	103.28	1	1	1	19508000	10254000	4644000	4610200
VSEFLK	RFLTRMTRVSEFLKVA	TRVSEFLKVAEQVGID	R	V	S	L	K	V	0	0	0	0	0	0	1	0	0	0	1	1	0	1	0	1	0	0	0	1	0	6	0	721.40104	F1MGT4;G3N2G3	F1MGT4	203	208	yes	no	2	0.052678	78.445			1	2126200	0	0	2126200
VSQPIEGHAASFAQFK	QLYSVDRKVSQPIEGH	AASFAQFKMEGNAEES	K	V	S	F	K	M	3	0	0	0	0	2	1	1	1	1	0	1	0	2	1	2	0	0	0	1	0	16	0	1715.8631	P49951;F1MPU0	P49951	190	205	yes	no	2;3	1.8142E-08	156.11	3	4	5	5855000000	2427800000	2053600000	1373600000
VSYRPTQVGR	VASFDYYRVSYRPTQV	YRPTQVGRLDSSVVPN	R	V	S	G	R	L	0	2	0	0	0	1	0	1	0	0	0	0	0	0	1	1	1	0	1	2	0	10	1	1161.6255	E1BKN2	E1BKN2	896	905	yes	yes	3	0.0041298	98.04	1	1	1	58805000	38188000	9883300	10734000
VTDFGDKVEDPTFLNQLQSGVNR	YERGEKPKVTDFGDKV	QLQSGVNRWIREIQKV	K	V	T	N	R	W	0	1	2	3	0	2	1	2	0	0	2	1	0	2	1	1	2	0	0	3	0	23	1	2578.2663	E1BDX8	E1BDX8	228	250	yes	yes	3	2.1127E-06	110.75	1		1	14965000	9225800	0	5739100
VTMQNLNDR	GLLSGNEKVTMQNLND	TMQNLNDRLASYLDKV	K	V	T	D	R	L	0	1	2	1	0	1	0	0	0	0	1	0	1	0	0	0	1	0	0	1	0	9	0	1089.5237	CON__P13645;CON__P02535-1;CON__A2A4G1;CON__P08779;Q148H6;CON__Q148H6;CON__Q7Z3Y7;Q0P5J4;CON__Q7Z3Z0;CON__Q7Z3Y8;Q0P5J6;CON__Q9Z2K1;CON__Q3ZAW8;CON__Q7Z3Y9	CON__P13645	148	156	no	no	2	0.00029139	163.32	2	2	2	22040000	11902000	5044800	5093600
VTSHAIVK	VSTKKVEKVTSHAIVK	VTSHAIVKEVTQSD__	K	V	T	V	K	E	1	0	0	0	0	0	0	0	1	1	0	1	0	0	0	1	1	0	0	2	0	8	0	853.50215	F1MDZ2;O77788	F1MDZ2	913	920	yes	no	2	0.0012457	125.31	1	1	1	74853000	42965000	21538000	10350000
VVGAMQLYSVDR	GISAQQNRVVGAMQLY	MQLYSVDRKVSQPIEG	R	V	V	D	R	K	1	1	0	1	0	1	0	1	0	0	1	0	1	0	0	1	0	0	1	3	0	12	0	1336.6809	P49951;F1MPU0	P49951	177	188	yes	no	2	7.6661E-07	184.44	2	2	2	172920000	103180000	38466000	31279000
VVGAMQLYSVDRK	GISAQQNRVVGAMQLY	QLYSVDRKVSQPIEGH	R	V	V	R	K	V	1	1	0	1	0	1	0	1	0	0	1	1	1	0	0	1	0	0	1	3	0	13	1	1464.7759	P49951;F1MPU0	P49951	177	189	yes	no	2;3	1.6367E-07	177.83	5	4	4	446300000	218780000	145090000	82431000
VVSNTIEPLTLFHK	IQAEPLYRVVSNTIEP	EPLTLFHKMGVGRLDM	R	V	V	H	K	M	0	0	1	0	0	0	1	0	1	1	2	1	0	1	1	1	2	0	0	2	0	14	0	1596.8875	F1N3M8;G3MYP5	G3MYP5	179	192	no	no	2;3	0.00011096	106.32	1	2	1	119180000	65104000	29758000	24316000
VVTEEVTTTTTTITEK	ISVVDTLKVVTEEVTT	TTTTITEKHKLNVPET	K	V	V	E	K	H	0	0	0	0	0	0	3	0	0	1	0	1	0	0	0	0	8	0	0	3	0	16	0	1751.904	G3N3N0;F1MQL2;G3N0C1	G3N3N0	684	699	yes	no	2	0.0015335	75.018			1	4298500	0	0	4298500
WELLQQMNVGTRPINLEPIFQGYIDSLKR	QNQVLQTKWELLQQMN	GYIDSLKRYLDGLTAE	K	W	E	K	R	Y	0	2	2	1	0	3	2	2	0	3	4	1	1	1	2	1	1	1	1	1	0	29	2	3457.818	CON__P35908	CON__P35908	216	244	yes	yes	4	0.012834	97.057	1	1	1	0	0	0	0
WELLQQVDTSTR	QNQVLQTKWELLQQVD	QQVDTSTRTHNLEPYF	K	W	E	T	R	T	0	1	0	1	0	2	1	0	0	0	2	0	0	0	0	1	2	1	0	1	0	12	0	1474.7416	CON__P04264	CON__P04264	212	223	no	no		1	NaN				0	0	0	0
WEMAAQLR	DAELRNTKWEMAAQLR	WEMAAQLREYQDLLNV	K	W	E	L	R	E	2	1	0	0	0	1	1	0	0	0	1	0	1	0	0	0	0	1	0	0	0	8	0	1003.4909	F1MSQ6	F1MSQ6	370	377	yes	yes	2	0.049326	101.33	1		1	0	0	0	0
WISLNTVALVTDNAVYHWSMEGESQPVK	TDDVTFWKWISLNTVA	EGESQPVKMFDRHSSL	K	W	I	V	K	M	2	0	2	1	0	1	2	1	1	1	2	1	1	0	1	3	2	2	1	4	0	28	0	3173.5492	P49951;F1MPU0	P49951	113	140	yes	no	3	0.0003963	70.718	3	3	1	17591000	13909000	3682700	0
WLAESPVGLPPEEEDKLTR	QKGLEVERWLAESPVG	EEEDKLTRSPFEIISP	R	W	L	T	R	S	1	1	0	1	0	0	4	1	0	0	3	1	0	0	3	1	1	1	0	1	0	19	1	2165.1004	G3MYP5	G3MYP5	1779	1797	yes	yes	3	0.0018428	86.8	1	1	1	55844000	25147000	17771000	12926000
WLLLTGISAQQNR	YRTDAKQKWLLLTGIS	GISAQQNRVVGAMQLY	K	W	L	N	R	V	1	1	1	0	0	2	0	1	0	1	3	0	0	0	0	1	1	1	0	0	0	13	0	1498.8256	P49951;F1MPU0	P49951	164	176	yes	no	2;3	2.4916E-18	228.93	7	4	4	2132000000	1109200000	541530000	481290000
WQALLVQIR	RLGEDLSKWQALLVQI	QALLVQIRKARGTFDN	K	W	Q	I	R	K	1	1	0	0	0	2	0	0	0	1	2	0	0	0	0	0	0	1	0	1	0	9	0	1125.6659	E1BDX8	E1BDX8	1078	1086	yes	yes	2	0.00048405	136.75	1	1	1	7778600	4378900	1540400	1859300
WREEQR	QEPESIRKWREEQRKR	RKWREEQRKRLQELDA	K	W	R	Q	R	K	0	2	0	0	0	1	2	0	0	0	0	0	0	0	0	0	0	1	0	0	0	6	1	902.43586	P04975;G3N252;F1MX40	P04975	105	110	yes	no	2;3	0.0025393	166.39	2	2	2	746340000	393420000	207030000	145890000
WREEQTER	SEPESIRKWREEQTER	WREEQTERLEALDANS	K	W	R	E	R	L	0	2	0	0	0	1	3	0	0	0	0	0	0	0	0	0	1	1	0	0	0	8	1	1132.5261	P04973	P04973	108	115	yes	yes	2;3	0.000154	192.91	2	2	2	1532600000	846190000	420420000	266030000
WREEQTERLEALDANSR	SEPESIRKWREEQTER	EALDANSRKQEAEWKE	K	W	R	S	R	K	2	3	1	1	0	1	4	0	0	0	2	0	0	0	0	1	1	1	0	0	0	17	2	2102.0141	P04973	P04973	108	124	yes	yes	2;3;4	1.5446E-23	284.57	3	3	2	195870000	105130000	54087000	36656000
WSPIAASLPELVQR	QLYETIQRWSPIAASL	SLPELVQRLVTIKQLH	R	W	S	Q	R	L	2	1	0	0	0	1	1	0	0	1	2	0	0	0	2	2	0	1	0	1	0	14	0	1565.8566	Q3ZCF0	Q3ZCF0	321	334	yes	yes	2	1.2915E-07	143.58		1	1	9549900	0	4955500	4594500
WSQLLANSATR	RHAALMKRWSQLLANS	LLANSATRKKKLLEAQ	R	W	S	T	R	K	2	1	1	0	0	1	0	0	0	0	2	0	0	0	0	2	1	1	0	0	0	11	0	1245.6466	E1BFB0	E1BFB0	2065	2075	yes	yes	2	5.5656E-09	214.67	1	1	1	28439000	17190000	4732500	6516900
YEALKEPMVAR	KQEALVARYEALKEPM	LKEPMVARKQKLADSL	R	Y	E	A	R	K	2	1	0	0	0	0	2	0	0	0	1	1	1	0	1	0	0	0	1	1	0	11	1	1305.6751	E1BFB0	E1BFB0	766	776	yes	yes	3	0.05145	66.56	1	1	1	0	0	0	0
YEEEVLSR	TLRNLQARYEEEVLSR	YEEEVLSREDAEGRLM	R	Y	E	S	R	E	0	1	0	0	0	0	3	0	0	0	1	0	0	0	0	1	0	0	1	1	0	8	0	1023.4873	P02548	P02548	178	185	yes	yes	2	0.00081179	156.75	1	1	1	205480000	109180000	56625000	39680000
YEEEVLSREDAEGR	TLRNLQARYEEEVLSR	SREDAEGRLMEARKGA	R	Y	E	G	R	L	1	2	0	1	0	0	5	1	0	0	1	0	0	0	0	1	0	0	1	1	0	14	1	1680.7591	P02548	P02548	178	191	yes	yes	2;3	7.7039E-17	252.52	2	2	2	176230000	100030000	44402000	31799000
YEELQITAGR	AESLYQSKYEELQITA	ELQITAGRHGDSVRNS	K	Y	E	G	R	H	1	1	0	0	0	1	2	1	0	1	1	0	0	0	0	0	1	0	1	0	0	10	0	1178.5932	CON__P04264	CON__P04264	377	386	yes	yes	2	3.2819E-05	180.67	1	1	1	89967000	47510000	24047000	18411000
YEVWVSAVR	QALRPGSRYEVWVSAV	EVWVSAVRGTNESEAT	R	Y	E	V	R	G	1	1	0	0	0	0	1	0	0	0	0	0	0	0	0	1	0	1	1	3	0	9	0	1107.5713	E1BKN2	E1BKN2	570	578	yes	yes	2	0.00047706	144.5	1	1	1	24621000	12409000	6161100	6051500
YFETSALKEEVTK	EDKSGMSKYFETSALK	ALKEEVTKSIQPGSDY	K	Y	F	T	K	S	1	0	0	0	0	0	3	0	0	0	1	2	0	1	0	1	2	0	1	1	0	13	1	1543.777	F1MEW3	F1MEW3	575	587	yes	yes	2;3	5.8428E-07	157.86	2	2	2	382870000	187570000	132840000	62470000
YGLVGGEGGK	KVDFILLKYGLVGGEG	LVGGEGGKTTFRLQPP	K	Y	G	G	K	T	0	0	0	0	0	0	1	5	0	0	1	1	0	0	0	0	0	0	1	1	0	10	0	935.47125	E1BKN2	E1BKN2	538	547	yes	yes	2	0.00035745	129.85	1	1	1	34429000	18005000	10502000	5922100
YHEQLSTQSLIELFESFK	ICVQVASKYHEQLSTQ	IELFESFKSFEGLFYF	K	Y	H	F	K	S	0	0	0	0	0	2	3	0	1	1	3	1	0	2	0	3	1	0	1	0	0	18	0	2198.0895	P49951;F1MPU0	P49951	689	706	yes	no	2;3	1.3958E-54	334.03	4	2	2	585560000	373580000	167650000	44331000
YIEIYVQK	LYRNNLQKYIEIYVQK	YIEIYVQKVNPSRLPV	K	Y	I	Q	K	V	0	0	0	0	0	1	1	0	0	2	0	1	0	0	0	0	0	0	2	1	0	8	0	1054.5699	P49951;F1MPU0	P49951	799	806	yes	no	2	0.0010564	133.12	1	1	1	1291000000	694210000	258300000	338470000
YIEIYVQKVNPSR	LYRNNLQKYIEIYVQK	VQKVNPSRLPVVIGGL	K	Y	I	S	R	L	0	1	1	0	0	1	1	0	0	2	0	1	0	0	1	1	0	0	2	2	0	13	1	1607.8671	P49951;F1MPU0	P49951	799	811	yes	no	3	0.016426	80.96	1	1	1	17579000	12323000	2433400	2822400
YLDGLTAER	GYIDSLKRYLDGLTAE	LDGLTAERTSQNSELN	R	Y	L	E	R	T	1	1	0	1	0	0	1	1	0	0	2	0	0	0	0	0	1	0	1	0	0	9	0	1036.5189	CON__P35908	CON__P35908	245	253	yes	yes	2	0.050069	72.607		1		6928800	0	6928800	0
YLQMAR	GNWEELVKYLQMARKK	VKYLQMARKKARESYV	K	Y	L	A	R	K	1	1	0	0	0	1	0	0	0	0	1	0	1	0	0	0	0	0	1	0	0	6	0	780.39524	P49951;F1MPU0	P49951	1156	1161	yes	no	2	0.011749	124.34	2	2	2	45239000	28054000	10142000	7043700
YLTVAAIFR	ACDPRHGRYLTVAAIF	LTVAAIFRGRMSMKEV	R	Y	L	F	R	G	2	1	0	0	0	0	0	0	0	1	1	0	0	1	0	0	1	0	1	1	0	9	0	1052.6019	E1BJB1;Q6B856	E1BJB1	310	318	yes	no	2	0.00048849	133.86	1	1	1	13916000	7208500	3330400	3376700
YLTVAAVFR	ACDPRHGRYLTVAAVF	LTVAAVFRGRMSMKEV	R	Y	L	F	R	G	2	1	0	0	0	0	0	0	0	0	1	0	0	1	0	0	1	0	1	2	0	9	0	1038.5862	Q2KJD0;E1B953;Q3MHM5;G3X7R8;Q2HJ81;Q3ZBU7	Q3MHM5	310	318	no	no	2	0.00033712	160.63	1	1	1	17498000	8566800	4166300	4765400
YPVATQK	LRHLDFLRYPVATQKD	RYPVATQKDLATGAVP	R	Y	P	Q	K	D	1	0	0	0	0	1	0	0	0	0	0	1	0	0	1	0	1	0	1	1	0	7	0	805.4334	F1N3M8;G3MYP5	G3MYP5	291	297	no	no	2	0.006803	121.29	1	1	1	25043000	14022000	6410700	4610600
YQKEQDVVQEWR	QEDKAWEKYQKEQDVV	QDVVQEWRETSPSSRE	K	Y	Q	W	R	E	0	1	0	1	0	3	2	0	0	0	0	1	0	0	0	0	0	1	1	2	0	12	1	1606.774	F1N3M8;G3MYP5	G3MYP5	1647	1658	no	no	3	8.1597E-05	129.37		1		5462200	0	5462200	0
YTEHSTVGLAQQWDQLDQLGMR	EALILDNKYTEHSTVG	QLDQLGMRMQHNLEQQ	K	Y	T	M	R	M	1	1	0	2	0	4	1	2	1	0	3	0	1	0	0	1	2	1	1	1	0	22	0	2575.2125	E1BFB0	E1BFB0	2282	2303	yes	yes	3	1.7125E-05	97.49	1	1	1	0	0	0	0
YTVPLPSPVQDSENLSGESGSFYEGTDDKAR	LGYCVFNKYTVPLPSP	EGTDDKARRDLATDLS	K	Y	T	A	R	R	1	1	1	3	0	1	3	3	0	0	2	1	0	1	3	5	2	0	2	2	0	31	1	3344.5321	F1MEW3	F1MEW3	878	908	yes	yes	3	0.033913	60.527			1	16899000	0	0	16899000
YVETPR	YSTSYKRRYVETPRVH	RRYVETPRVHISSVRS	R	Y	V	P	R	V	0	1	0	0	0	0	1	0	0	0	0	0	0	0	1	0	1	0	1	1	0	6	0	763.38645	P02548	P02548	18	23	yes	yes	2	0.0082325	148.12	1	1	1	52561000	29433000	13505000	9623300
YWALEQK	KDQALAQKYWALEQKA	KYWALEQKAEALEQTI	K	Y	W	Q	K	A	1	0	0	0	0	1	1	0	0	0	1	1	0	0	0	0	0	1	1	0	0	7	0	936.47052	F1N3M8;G3MYP5	G3MYP5	1561	1567	no	no	2	0.0051534	132.09	1	1	1	31185000	17460000	7719500	6005100
[truncated: 9 more columns]
