# Supplementary material for: The ∼16 kDa C-Terminal Sequence of Clathrin Assembly Protein AP180 Is Essential for Efficient Clathrin Binding
Source: PLoS One. 2014 Oct 20;9(10):e110557. doi: 10.1371/journal.pone.0110557 (PMC4203807; doi:10.1371/journal.pone.0110557)
Supplement: Data S2 — Contains the tabulated output of the MaxQuant software from processing the LC-MS/MS data of the tryptic digestion of purified clathrin. (ZIP) [file pone.0110557.s003.zip › txt/proteinGroups.txt]

Protein IDs	Majority protein IDs	Peptide counts (all)	Peptide counts (razor+unique)	Peptide counts (unique)	Fasta headers	Number of proteins	Peptides	Razor + unique peptides	Unique peptides	Peptides 1	Peptides 2	Peptides 3	Razor + unique peptides 1	Razor + unique peptides 2	Razor + unique peptides 3	Unique peptides 1	Unique peptides 2	Unique peptides 3	Sequence coverage [%]	Unique + razor sequence coverage [%]	Unique sequence coverage [%]	Mol. weight [kDa]	Sequence length	Sequence lengths	Experiment 1	Experiment 2	Experiment 3	PEP	Sequence coverage 1 [%]	Sequence coverage 2 [%]	Sequence coverage 3 [%]	Intensity	Intensity 1	Intensity 2	Intensity 3	iBAQ	iBAQ 1	iBAQ 2	iBAQ 3	LFQ intensity 1	LFQ intensity 2	LFQ intensity 3	MS/MS Count 1	MS/MS Count 2	MS/MS Count 3	MS/MS Count	Only identified by site	Reverse	Contaminant
A7MB16	A7MB16	2	2	2	>sp|A7MB16|EIF3B_BOVIN Eukaryotic translation initiation factor 3 subunit B OS=Bos taurus GN=EIF3B PE=2 SV=1	1	2	2	2	1	1	0	1	1	0	1	1	0	2.9	2.9	2.9	88.918	786	786	1	1		3.3538E-11	1.7	1.3	0	6561700	4542400	2019300	0	177340	122770	54577	0	4542400	0	0	1	1	0	2
CON__P04264	CON__P04264	29	29	16	>P04264 SWISS-PROT:P04264 Tax_Id=9606 Gene_Symbol=KRT1 Keratin, type II cytoskeletal 1	1	29	29	16	22	26	25	22	26	25	12	14	14	39.6	39.6	25	66.017	644	644	29	32	29	1.3068E-162	32.9	37.3	35.4	1412800000	769440000	352980000	290350000	40365000	21984000	10085000	8295800	776720000	727780000	771730000	26	31	27	84			+
CON__P13645;P06394;A6QNZ7;CON__P02535-1;CON__P08730-1;Q17QL7;CON__A2A4G1;CON__P08779;CON__P08727;CON__P19001;CON__ENSEMBL:ENSP00000377550;CON__P19012;Q148H6;CON__Q148H6;F1MJ66;CON__Q7Z3Y7;CON__P05784;Q0P5J4;CON__Q7Z3Z0;CON__P13646-1;CON__Q7Z3Y8;Q0P5J6;CON__Q9Z2K1;CON__Q3ZAW8;F1MFW9;CON__Q99456;CON__Q2M2I5;G3X7W8;F1MXG6;F1MSA6;P08728;CON__Q14525;A6QP90;Q148I8;CON__Q9UE12;CON__Q15323;CON__A2A5Y0;CO…	CON__P13645	26;12;12;9;5;4;4;4;3;3;3;3;3;3;3;3;2;2;2;2;2;2;2;2;2;2;2;1;1;1;1;1;1;1;1;1;1;1;1;1;1;1;1;1;1;1;1;1;1;1;1;1	26;12;12;9;5;4;4;4;3;3;3;3;3;3;3;3;2;2;2;2;2;2;2;2;2;2;2;1;1;1;1;1;1;1;1;1;1;1;1;1;1;1;1;1;1;1;1;1;1;1;1;1	22;9;9;7;2;3;0;0;0;0;2;0;1;1;0;1;0;1;1;2;1;1;0;0;1;0;1;0;0;0;0;0;0;0;0;0;0;0;0;0;0;0;0;0;0;0;0;0;0;0;0;0	>P13645 SWISS-PROT:P13645 Tax_Id=9606 Gene_Symbol=KRT10 Keratin, type I cytoskeletal 10	52	26	26	22	25	24	21	25	24	21	21	20	17	45.5	45.5	41.3	59.51	593	593;526;526;570;437;453;456;473;400;403;420;456;464;464;467;486;423;450;450;458;459;460;469;474;481;494;525;353;384;391;399;404;405;416;416;416;416;425;431;448;452;452;452;453;454;455;456;467;468;471;476;518	35	33	30	6.5217E-188	42.8	42.3	30	882190000	479250000	225880000	177060000	31507000	17116000	8067300	6323400	503150000	471020000	446030000	23	22	21	66			+
CON__P35527	CON__P35527	23	22	22	>P35527 SWISS-PROT:P35527 Tax_Id=9606 Gene_Symbol=KRT9 Keratin, type I cytoskeletal 9	1	23	22	22	18	21	18	17	20	17	17	20	17	53	53	53	62.129	623	623	20	23	22	8.6027E-158	35.3	49	37.4	527120000	260330000	141790000	125000000	17571000	8677700	4726200	4166700	290000000	284320000	313530000	14	17	14	45			+
CON__P35908;CON__Q9R0H5;CON__Q6NXH9;G3MYU2;CON__Q7Z794;E1B991;G3MZ71	CON__P35908	25;3;3;3;3;3;3	23;2;2;2;2;2;2	15;0;0;0;0;0;0	>P35908 SWISS-PROT:P35908 Tax_Id=9606 Gene_Symbol=KRT2 Keratin, type II cytoskeletal 2 epidermal	7	25	23	15	17	17	19	15	15	17	11	9	11	49.5	46.4	35.3	65.865	645	645;524;539;570;578;617;618	18	18	20	4.085E-131	37.7	35	38	373340000	182110000	109330000	81900000	8889000	4336000	2603000	1950000	200390000	207750000	219300000	16	15	17	48			+
E1B7R4	E1B7R4	3	3	3	>tr|E1B7R4|E1B7R4_BOVIN Eukaryotic translation initiation factor 3 subunit A OS=Bos taurus GN=EIF3A PE=3 SV=2	1	3	3	3	2	2	1	2	2	1	2	2	1	2.7	2.7	2.7	166.27	1378	1378	2	2	1	1.8283E-09	1.8	2	1.1	13335000	11517000	1355100	463500	148170	127970	15056	5150	11517000	0	0	2	1	1	4
E1BDX8	E1BDX8	43	43	43	>tr|E1BDX8|E1BDX8_BOVIN Uncharacterized protein OS=Bos taurus GN=DYNC1H1 PE=4 SV=1	1	43	43	43	33	24	28	33	24	28	33	24	28	13.1	13.1	13.1	532.05	4646	4646	34	25	29	1.0235E-156	10.1	7.4	9	287580000	170820000	60478000	56275000	1009000	599380	212200	197460	157790000	151450000	137110000	27	19	21	67
E1BFB0	E1BFB0	76	76	76	>tr|E1BFB0|E1BFB0_BOVIN Uncharacterized protein OS=Bos taurus GN=SPTAN1 PE=4 SV=2	1	76	76	76	59	54	60	59	54	60	59	54	60	42	42	42	284.57	2472	2472	65	60	66	0	32.1	29.8	33.7	1217000000	680970000	287160000	248890000	6371900	3565300	1503500	1303100	670970000	627880000	641670000	53	52	54	159
E1BJB1;Q6B856;G3X7R7;G3N1W7;E1BJK2;CON__ENSEMBL:ENSBTAP00000025008	E1BJB1;Q6B856;G3X7R7;G3N1W7	14;13;9;8;3;3	4;3;2;1;0;0	4;3;2;1;0;0	>tr|E1BJB1|E1BJB1_BOVIN Tubulin beta-2B chain OS=Bos taurus GN=TUBB2B PE=3 SV=1;>sp|Q6B856|TBB2B_BOVIN Tubulin beta-2B chain OS=Bos taurus GN=TUBB2B PE=1 SV=2;>tr|G3X7R7|G3X7R7_BOVIN Tubulin beta-2B chain OS=Bos taurus GN=TUBB2B PE=3 SV=1;>tr|G3N1W7|G3N1W7	6	14	4	4	13	13	13	4	4	4	4	4	4	40.4	14.2	14.2	49.906	445	445;445;330;330;450;536	4	4	4	1.1164E-92	36.6	37.8	34.6	127000000	72865000	32138000	21997000	5772700	3312000	1460800	999850	71350000	66091000	60805000	3	3	3	9
E1BKN2	E1BKN2	20	20	20	>tr|E1BKN2|E1BKN2_BOVIN Uncharacterized protein OS=Bos taurus GN=TNR PE=4 SV=1	1	20	20	20	16	17	18	16	17	18	16	17	18	18.3	18.3	18.3	149.39	1358	1358	19	18	20	2.8399E-104	15	15.8	15.8	818950000	423000000	211240000	184700000	12999000	6714300	3353000	2931800	458930000	439470000	455430000	19	18	21	58
E1BMW9	E1BMW9	2	2	2	>tr|E1BMW9|E1BMW9_BOVIN Uncharacterized protein OS=Bos taurus GN=PURA PE=4 SV=2	1	2	2	2	0	1	1	0	1	1	0	1	1	15.2	15.2	15.2	34.88	322	322		1	1	2.3154E-10	0	7.1	8.1	8423400	0	3943000	4480400	601670	0	281640	320030	0	8205000	0	0	1	1	2
E1BP30;Q1LZ76;F1MQZ0	E1BP30;Q1LZ76;F1MQZ0	4;2;2	4;2;2	4;2;2	>tr|E1BP30|E1BP30_BOVIN Reticulon (Fragment) OS=Bos taurus GN=RTN1 PE=4 SV=2;>tr|Q1LZ76|Q1LZ76_BOVIN Reticulon OS=Bos taurus GN=RTN1 PE=2 SV=1;>tr|F1MQZ0|F1MQZ0_BOVIN Uncharacterized protein (Fragment) OS=Bos taurus GN=RTN1 PE=4 SV=1	3	4	4	4	4	3	1	4	3	1	4	3	1	8.5	8.5	8.5	75.828	697	697;208;255	4	3	1	2.2874E-15	8.5	5.5	1.1	43912000	31127000	10851000	1933700	1291500	915490	319150	56874	30592000	23115000	0	4	3	1	8
F1MDZ2;O77788;REV__F1MEC0	F1MDZ2;O77788	55;53;1	55;53;1	49;48;1	>tr|F1MDZ2|F1MDZ2_BOVIN Neurofilament medium polypeptide OS=Bos taurus GN=NEFM PE=4 SV=2;>sp|O77788|NFM_BOVIN Neurofilament medium polypeptide OS=Bos taurus GN=NEFM PE=1 SV=3	3	55	55	49	47	48	50	47	48	50	41	42	45	53.9	53.9	50.8	103.13	926	926;926;913	81	81	79	0	49.6	49.2	53.2	9510600000	5340400000	2315100000	1855000000	166850000	93692000	40616000	32544000	5354300000	4677000000	5060500000	67	70	67	204
F1MEW3	F1MEW3	82	82	82	>tr|F1MEW3|F1MEW3_BOVIN Microtubule-associated protein OS=Bos taurus GN=MAP2 PE=3 SV=1	1	82	82	82	71	70	73	71	70	73	71	70	73	52.8	52.8	52.8	199.35	1835	1835	98	101	102	0	44.8	46.4	50.3	7553900000	4056000000	1991500000	1506500000	73339000	39378000	19335000	14626000	4194000000	4076300000	3936400000	96	91	93	280
F1MGK5	F1MGK5	3	3	3	>tr|F1MGK5|F1MGK5_BOVIN Uncharacterized protein OS=Bos taurus GN=PTPRZ1 PE=4 SV=2	1	3	3	3	2	2	2	2	2	2	2	2	2	1.6	1.6	1.6	255.17	2324	2324	3	3	3	3.1053E-27	1.2	1.3	1.3	137990000	73488000	36602000	27895000	1604500	854520	425610	324370	69716000	75534000	78598000	3	3	3	9
F1MGT4;F1N605;G3N2G3	F1MGT4	11;2;1	11;2;1	11;2;1	>tr|F1MGT4|F1MGT4_BOVIN Uncharacterized protein (Fragment) OS=Bos taurus GN=SNAP91 PE=4 SV=2	3	11	11	11	9	7	8	9	7	8	9	7	8	15.8	15.8	15.8	89.568	857	857;616;780	9	7	8	7.9554E-62	13.8	11.1	11.2	137160000	83424000	30014000	23717000	4286100	2607000	937940	741170	77719000	78270000	52973000	7	5	7	19
F1MIC9	F1MIC9	19	19	19	>tr|F1MIC9|F1MIC9_BOVIN Uncharacterized protein OS=Bos taurus GN=DCTN1 PE=4 SV=1	1	19	19	19	17	13	16	17	13	16	17	13	16	21.1	21.1	21.1	136.89	1239	1239	17	14	18	7.4069E-142	19	16.1	18.5	254500000	156100000	44362000	54039000	3486300	2138400	607700	740270	134600000	114630000	142910000	15	11	15	41
G3N3N0;F1MQL2;G3N0C1	G3N3N0;F1MQL2;G3N0C1	2;2;2	2;2;2	2;2;2	>tr|G3N3N0|G3N3N0_BOVIN Uncharacterized protein (Fragment) OS=Bos taurus GN=ANK2 PE=4 SV=1;>tr|F1MQL2|F1MQL2_BOVIN Uncharacterized protein (Fragment) OS=Bos taurus GN=ANK2 PE=4 SV=2;>tr|G3N0C1|G3N0C1_BOVIN Uncharacterized protein (Fragment) OS=Bos taurus G	3	2	2	2	0	1	2	0	1	2	0	1	2	2.3	2.3	2.3	154.12	1389	1389;1664;2302		1	2	1.8707E-05	0	1.2	2.3	4298500	0	0	4298500	48298	0	0	48298	0	0	11433000	0	0	1	1
F1MRZ5;F1MRZ6	F1MRZ5;F1MRZ6	5;5	5;5	5;5	>tr|F1MRZ5|F1MRZ5_BOVIN Uncharacterized protein OS=Bos taurus GN=TNC PE=4 SV=1;>tr|F1MRZ6|F1MRZ6_BOVIN Uncharacterized protein (Fragment) OS=Bos taurus GN=TNC PE=4 SV=2	2	5	5	5	3	4	4	3	4	4	3	4	4	4.1	4.1	4.1	191.15	1746	1746;2231	3	4	4	6.9244E-21	2.1	3.6	3.6	14156000	1704400	6417700	6034100	145940	17571	66161	62208	0	13341000	16063000	1	3	3	7
F1MSQ6;O62654	F1MSQ6	31;1	28;0	28;0	>tr|F1MSQ6|F1MSQ6_BOVIN Uncharacterized protein (Fragment) OS=Bos taurus GN=NEFH PE=3 SV=2	2	31	28	28	30	26	27	27	23	24	27	23	24	30	28.1	28.1	118.29	1082	1082;470	37	34	32	9.8368E-266	29.2	26.1	26.1	2662100000	1404600000	738690000	518750000	52197000	27542000	14484000	10172000	1455700000	1480100000	1385700000	37	34	30	101
F1MYC9;F1MKE9;E1BMN5	F1MYC9	36;1;1	36;1;1	36;1;1	>tr|F1MYC9|F1MYC9_BOVIN Uncharacterized protein OS=Bos taurus GN=SPTBN1 PE=4 SV=1	3	36	36	36	28	21	22	28	21	22	28	21	22	22.9	22.9	22.9	274.39	2363	2363;2335;2397	29	21	22	6.3678E-170	18.1	14.4	14.6	296010000	170850000	67143000	58008000	1816000	1048200	411920	355880	154760000	142660000	167440000	17	11	13	41
Q2KJ21;F1N037	Q2KJ21;F1N037	2;2	2;2	2;2	>sp|Q2KJ21|CACO1_BOVIN Calcium-binding and coiled-coil domain-containing protein 1 OS=Bos taurus GN=CALCOCO1 PE=2 SV=1;>tr|F1N037|F1N037_BOVIN Calcium-binding and coiled-coil domain-containing protein 1 OS=Bos taurus GN=CALCOCO1 PE=4 SV=1	2	2	2	2	1	1	2	1	1	2	1	1	2	4	4	4	75.66	680	680;680	1	1	2	5.5493E-33	2.2	2.2	4	27157000	11658000	8609900	6889100	662370	284350	210000	168030	0	0	18323000	1	1	2	4
F1N1S2;F1MF27	F1N1S2	45;1	44;1	44;1	>tr|F1N1S2|F1N1S2_BOVIN Uncharacterized protein OS=Bos taurus GN=MAP1B PE=4 SV=2	2	45	44	44	31	40	37	30	39	36	30	39	36	24.9	24.5	24.5	270.27	2466	2466;1581	33	42	39	1.9116E-195	17.8	21.6	20.6	941260000	434350000	291400000	215520000	8114300	3744400	2512100	1857900	553400000	548950000	511580000	25	32	29	86
F1N319;Q28021	F1N319;Q28021	2;2	2;2	2;2	>tr|F1N319|F1N319_BOVIN Rho-associated protein kinase 2 (Fragment) OS=Bos taurus GN=ROCK2 PE=4 SV=2;>sp|Q28021|ROCK2_BOVIN Rho-associated protein kinase 2 OS=Bos taurus GN=ROCK2 PE=1 SV=1	2	2	2	2	1	1	0	1	1	0	1	1	0	1.6	1.6	1.6	155.89	1341	1341;1388	1	1		3.1734E-09	1	0.6	0	4426100	4077400	348690	0	47086	43377	3709.4	0	4077400	0	0	1	1	0	2
F1N3M8	F1N3M8	79	3	3	>tr|F1N3M8|F1N3M8_BOVIN Uncharacterized protein (Fragment) OS=Bos taurus GN=MAP1A PE=4 SV=2	1	79	3	3	66	68	64	2	3	3	2	3	3	41.2	1.2	1.2	245.65	2244	2244	4	4	5	0	35.9	37.3	35.5	176710000	111150000	34309000	31255000	1523400	958180	295770	269440	119150000	78125000	68403000	5	3	5	13
F1N690;F1N4X1	F1N690	5;1	5;1	5;1	>tr|F1N690|F1N690_BOVIN Acetyltransferase component of pyruvate dehydrogenase complex OS=Bos taurus GN=DLAT PE=3 SV=1	2	5	5	5	5	4	4	5	4	4	5	4	4	8.8	8.8	8.8	69.066	647	647;458	5	4	4	3.5407E-22	8.8	7.6	7.6	58802000	36289000	11247000	11266000	1589200	980780	303960	304490	29677000	25425000	34555000	4	3	3	10
F1N757	F1N757	2	2	2	>tr|F1N757|F1N757_BOVIN Uncharacterized protein OS=Bos taurus GN=TTN PE=4 SV=2	1	2	2	2	0	0	2	0	0	2	0	0	2	0.1	0.1	0.1	3813.9	34340	34340			2	0.002424	0	0	0.1	16886000	0	0	16886000	7403.1	0	0	7403.1	0	0	44913000	0	0	2	2
F2Z4F0	F2Z4F0	4	4	2	>tr|F2Z4F0|F2Z4F0_BOVIN Uncharacterized protein OS=Bos taurus GN=ACTR1A PE=3 SV=1	1	4	4	2	3	3	4	3	3	4	1	1	2	17.8	17.8	10.1	42.613	376	376	3	3	4	2.9818E-13	12	12	17.8	52305000	29201000	11805000	11299000	2179400	1216700	491860	470780	32562000	30561000	20694000	3	3	4	10
F6RAG5;F1N1G7;F1MZB0	F6RAG5	3;1;1	3;1;1	3;1;1	>tr|F6RAG5|F6RAG5_BOVIN Uncharacterized protein OS=Bos taurus GN=KIF5C PE=4 SV=1	3	3	3	3	3	0	1	3	0	1	3	0	1	4.2	4.2	4.2	109.19	956	956;963;1034	3		1	8.2546E-15	4.2	0	1.3	15490000	13364000	0	2126400	238310	205600	0	32713	13364000	0	0	2	0	1	3
G3MYP5;F1MW90	G3MYP5	104;1	104;1	27;0	>tr|G3MYP5|G3MYP5_BOVIN Uncharacterized protein OS=Bos taurus GN=MAP1A PE=4 SV=1	2	104	104	27	86	88	82	86	88	82	22	23	21	43.1	43.1	10.9	303.27	2806	2806;1028	112	115	109	0	36.5	38.9	37.1	4235700000	2186300000	1171900000	877580000	28051000	14479000	7760700	5811800	2444400000	2259900000	2254600000	102	106	95	303
P04975;G3N252;F1MX40	P04975;G3N252	13;13;1	13;13;1	13;13;1	>sp|P04975|CLCB_BOVIN Clathrin light chain B OS=Bos taurus GN=CLTB PE=1 SV=1;>tr|G3N252|G3N252_BOVIN Clathrin light chain B OS=Bos taurus GN=CLTB PE=4 SV=1	3	13	13	13	13	13	13	13	13	13	13	13	13	29.8	29.8	29.8	25.082	228	228;242;1032	19	21	21	3.0788E-61	29.8	29.8	29.8	8749000000	4504800000	2331600000	1912600000	874900000	450480000	233160000	191260000	4811300000	4908900000	4723500000	30	32	31	93
P00760;CON__P00761;CON__P07477;G3MXS2;G3N0B7;E1BQ07;E1BFR6	P00760	6;1;1;1;1;1;1	6;1;1;1;1;1;1	6;1;1;1;1;1;1	>sp|P00760|TRY1_BOVIN Cationic trypsin OS=Bos taurus PE=1 SV=3	7	6	6	6	5	5	6	5	5	6	5	5	6	31.3	31.3	31.3	25.785	246	246;231;247;331;343;420;527	16	16	18	5.6167E-47	27.2	27.2	31.3	2244900000	1256100000	536740000	452010000	160350000	89724000	38338000	32287000	1287200000	1096800000	1191200000	5	5	6	16
P02548	P02548	40	35	35	>sp|P02548|NFL_BOVIN Neurofilament light polypeptide OS=Bos taurus GN=NEFL PE=1 SV=3	1	40	35	35	36	38	39	31	33	34	31	33	34	64	58.7	58.7	62.645	555	555	43	40	46	4.7883E-241	60.4	55.9	63.1	4738400000	2275500000	1612100000	850790000	112820000	54178000	38384000	20257000	2662700000	2743600000	2392900000	39	33	33	105
P04973	P04973	15	15	15	>sp|P04973|CLCA_BOVIN Clathrin light chain A OS=Bos taurus GN=CLTA PE=1 SV=1	1	15	15	15	15	15	15	15	15	15	15	15	15	28.4	28.4	28.4	26.723	243	243	29	28	26	2.7018E-120	28.4	28.4	28.4	9753600000	5431900000	2402700000	1919000000	975360000	543190000	240270000	191900000	5556100000	5177800000	4797300000	37	36	37	110
P11179;F1MEQ3	P11179;F1MEQ3	4;3	4;3	4;3	>sp|P11179|ODO2_BOVIN Dihydrolipoyllysine-residue succinyltransferase component of 2-oxoglutarate dehydrogenase complex, mitochondrial OS=Bos taurus GN=DLST PE=1 SV=2;>tr|F1MEQ3|F1MEQ3_BOVIN Dihydrolipoyllysine-residue succinyltransferase component of 2-ox	2	4	4	4	3	2	2	3	2	2	3	2	2	13.8	13.8	13.8	48.972	455	455;456	3	2	2	9.0807E-13	9.2	6.2	7.3	3015600	0	0	3015600	111690	0	0	111690	0	0	8020600	0	0	1	1
P11966	P11966	4	4	4	>sp|P11966|ODPB_BOVIN Pyruvate dehydrogenase E1 component subunit beta, mitochondrial OS=Bos taurus GN=PDHB PE=1 SV=2	1	4	4	4	1	4	0	1	4	0	1	4	0	16.4	16.4	16.4	39.126	359	359	1	4		1.1417E-10	4.5	16.4	0	4238300	0	4238300	0	201820	0	201820	0	0	8819600	0	0	1	0	1
P19120	P19120	22	22	15	>sp|P19120|HSP7C_BOVIN Heat shock cognate 71 kDa protein OS=Bos taurus GN=HSPA8 PE=1 SV=2	1	22	22	15	15	15	19	15	15	19	9	9	13	34.9	34.9	25.4	71.24	650	650	19	19	22	3.4204E-129	23.5	23.4	31.5	400940000	221500000	95404000	84040000	10836000	5986400	2578500	2271400	214970000	203280000	225300000	11	10	12	33
P22439	P22439	2	2	2	>sp|P22439|ODPX_BOVIN Pyruvate dehydrogenase protein X component OS=Bos taurus GN=PDHX PE=1 SV=3	1	2	2	2	1	2	1	1	2	1	1	2	1	5.6	5.6	5.6	53.885	501	501	1	2	1	6.908E-29	2.8	5.6	2.8	15847000	5153300	6300900	4392500	528220	171780	210030	146420	0	13112000	0	1	2	1	4
P49951;F1MPU0	P49951;F1MPU0	110;104	110;104	110;104	>sp|P49951|CLH1_BOVIN Clathrin heavy chain 1 OS=Bos taurus GN=CLTC PE=1 SV=1;>tr|F1MPU0|F1MPU0_BOVIN Clathrin heavy chain 1 (Fragment) OS=Bos taurus GN=CLTC PE=4 SV=2	2	110	110	110	101	103	98	101	103	98	101	103	98	61.7	61.7	61.7	191.59	1675	1675;1661	276	253	251	0	58.3	59.6	56.7	83375000000	42226000000	22935000000	18215000000	850770000	430880000	234030000	185860000	42328000000	46841000000	48402000000	313	270	266	849
P63258;P60712;F1MRD0	P63258;P60712;F1MRD0	15;15;13	15;15;13	5;5;4	>sp|P63258|ACTG_BOVIN Actin, cytoplasmic 2 OS=Bos taurus GN=ACTG1 PE=1 SV=1;>sp|P60712|ACTB_BOVIN Actin, cytoplasmic 1 OS=Bos taurus GN=ACTB PE=1 SV=1;>tr|F1MRD0|F1MRD0_BOVIN Actin, cytoplasmic 1 OS=Bos taurus GN=ACTB PE=3 SV=2	3	15	15	5	14	13	13	14	13	13	5	4	5	47.7	47.7	24.8	41.792	375	375;375;375	17	17	16	9.8965E-64	47.7	36.8	44.8	556060000	310530000	143160000	102360000	24176000	13501000	6224500	4450500	325920000	268550000	286230000	11	14	12	37
Q08DH7	Q08DH7	38	32	32	>sp|Q08DH7|AINX_BOVIN Alpha-internexin OS=Bos taurus GN=INA PE=2 SV=1	1	38	32	32	34	35	37	28	29	32	28	29	32	57.1	51.3	51.3	55.395	499	499	41	41	44	0	51.9	55.3	57.1	4142600000	2080600000	1122500000	939570000	109020000	54753000	29538000	24725000	2190400000	2336700000	2273900000	43	40	42	125
Q0P5A1	Q0P5A1	2	2	2	>sp|Q0P5A1|DCTN3_BOVIN Dynactin subunit 3 OS=Bos taurus GN=DCTN3 PE=2 SV=1	1	2	2	2	2	1	1	2	1	1	2	1	1	8.1	8.1	8.1	21.191	186	186	2	1	1	0.0014907	8.1	4.3	4.3	15594000	6783100	4545600	4265800	1199600	521780	349660	328140	0	0	11346000	1	1	1	3
Q27975;Q27965;P0CB32	Q27975;Q27965	13;13;6	11;11;4	7;7;2	>sp|Q27975|HS71A_BOVIN Heat shock 70 kDa protein 1A OS=Bos taurus GN=HSPA1A PE=1 SV=2;>sp|Q27965|HS71B_BOVIN Heat shock 70 kDa protein 1B OS=Bos taurus GN=HSPA1B PE=2 SV=1	3	13	11	7	11	11	10	9	9	8	7	6	5	23.7	20.6	13.3	70.258	641	641;641;641	10	10	9	5.1031E-60	21.4	20.7	18.9	183640000	92643000	59617000	31385000	4832700	2438000	1568900	825920	94808000	123810000	81560000	9	9	9	27
Q28115;F1N566;CON__H-INV:HIT000292931;CON__Q61726;E1B898;CON__O43790;CON__Q6NT21;CON__P78385;A6QP32;A4FUZ0;Q148H4;CON__Q14533;Q0VD04;CON__P78386;CON__Q8N1N4-2;CON__Q7RTT2;A6QNX5	Q28115	37;1;1;1;1;1;1;1;1;1;1;1;1;1;1;1;1	37;1;1;1;1;1;1;1;1;1;1;1;1;1;1;1;1	35;0;0;0;0;0;0;0;0;0;0;0;0;0;0;0;0	>sp|Q28115|GFAP_BOVIN Glial fibrillary acidic protein OS=Bos taurus GN=GFAP PE=1 SV=2	17	37	37	35	36	33	35	36	33	35	34	31	33	75.5	75.5	72	49.511	428	428;357;443;479;486;486;493;493;493;493;500;505;507;507;521;521;528	53	47	51	5.2444E-196	75.5	72	73.6	3715900000	2060900000	886340000	768650000	109290000	60615000	26069000	22607000	1972900000	2007700000	1969100000	36	31	36	103
Q2HJ86;F2Z4C1;F6RP72;F2Z4K0;Q32KN8;Q3ZCJ7;F1MNF8;G5E6J5	Q2HJ86;F2Z4C1;F6RP72;F2Z4K0;Q32KN8;Q3ZCJ7;F1MNF8	14;13;12;12;11;10;9;1	14;13;12;12;11;10;9;1	2;1;1;1;1;0;0;0	>sp|Q2HJ86|TBA1D_BOVIN Tubulin alpha-1D chain OS=Bos taurus GN=TUBA1D PE=1 SV=1;>tr|F2Z4C1|F2Z4C1_BOVIN Uncharacterized protein OS=Bos taurus GN=TUBA1A PE=3 SV=1;>tr|F6RP72|F6RP72_BOVIN Uncharacterized protein (Fragment) OS=Bos taurus GN=TUBA3E PE=3 SV=1;>	8	14	14	2	10	13	14	10	13	14	2	2	2	36.7	36.7	5.1	50.282	452	452;451;449;450;450;449;449;451	11	14	15	2.4918E-75	28.1	32.7	36.7	526560000	212250000	136550000	177750000	22894000	9228300	5937000	7728500	315000000	303920000	350270000	10	13	13	36
Q2KJD0;E1B953	Q2KJD0	13;3	2;1	2;1	>sp|Q2KJD0|TBB5_BOVIN Tubulin beta-5 chain OS=Bos taurus GN=TUBB5 PE=2 SV=1	2	13	2	2	11	12	12	1	2	2	1	2	2	36	8.8	8.8	49.67	444	444;444	1	2	2	1.3089E-89	27.3	33.3	30.2	34475000	5785100	16735000	11955000	1567100	262960	760700	543400	0	0	31796000	1	2	2	5
Q2T9S0	Q2T9S0	9	3	3	>sp|Q2T9S0|TBB3_BOVIN Tubulin beta-3 chain OS=Bos taurus GN=TUBB3 PE=2 SV=1	1	9	3	3	6	7	8	1	1	2	1	1	2	20.7	9.1	9.1	50.432	450	450	1	1	2	2.3349E-68	11.6	15.3	16.9	2823700	0	0	2823700	128350	0	0	128350	0	0	7510100	0	0	1	1
Q3MHM5;G3X7R8;Q2HJ81	Q3MHM5;G3X7R8;Q2HJ81	14;7;7	14;7;7	1;0;0	>sp|Q3MHM5|TBB4B_BOVIN Tubulin beta-4B chain OS=Bos taurus GN=TUBB4B PE=2 SV=1;>tr|G3X7R8|G3X7R8_BOVIN Tubulin beta-6 chain (Fragment) OS=Bos taurus GN=TUBB6 PE=3 SV=1;>sp|Q2HJ81|TBB6_BOVIN Tubulin beta-6 chain OS=Bos taurus GN=TUBB6 PE=2 SV=1	3	14	14	1	12	13	13	12	13	13	1	1	1	39.8	39.8	2.7	49.83	445	445;354;446	15	18	18	5.323E-93	33.3	37.1	33.9	320690000	170370000	85105000	65211000	14577000	7744300	3868400	2964100	173900000	165850000	181160000	10	10	9	29
Q3SYW6	Q3SYW6	5	5	5	>sp|Q3SYW6|EIF3C_BOVIN Eukaryotic translation initiation factor 3 subunit C OS=Bos taurus GN=EIF3C PE=2 SV=1	1	5	5	5	4	2	2	4	2	2	4	2	2	7.5	7.5	7.5	105.36	912	912	4	2	2	4.9188E-24	6.5	3.3	2.2	14457000	9298200	2937100	2221300	314270	202130	63849	48290	7587700	7822200	0	3	2	2	7
Q3ZBU7	Q3ZBU7	11	3	3	>sp|Q3ZBU7|TBB4A_BOVIN Tubulin beta-4A chain OS=Bos taurus GN=TUBB4A PE=2 SV=1	1	11	3	3	10	10	10	3	2	3	3	2	3	32.4	7.9	7.9	49.585	444	444	3	2	3	6.5633E-65	29.7	28.8	26.6	64471000	45150000	6756800	12564000	2930500	2052300	307130	571100	37729000	25375000	29523000	3	2	3	8
Q3ZCF0	Q3ZCF0	8	8	8	>sp|Q3ZCF0|DCTN2_BOVIN Dynactin subunit 2 OS=Bos taurus GN=DCTN2 PE=2 SV=1	1	8	8	8	5	4	6	5	4	6	5	4	6	26.3	26.3	26.3	44.294	403	403	6	5	7	1.2093E-39	16.9	11.2	17.1	131240000	74889000	26335000	30012000	5249400	2995500	1053400	1200500	76621000	64194000	68698000	6	5	7	18
Q3ZCK1	Q3ZCK1	2	2	2	>sp|Q3ZCK1|EIF3L_BOVIN Eukaryotic translation initiation factor 3 subunit L OS=Bos taurus GN=EIF3L PE=2 SV=1	1	2	2	2	2	0	0	2	0	0	2	0	0	5.1	5.1	5.1	66.726	564	564	2			1.505E-11	5.1	0	0	1467300	1467300	0	0	45852	45852	0	0	1467300	0	0	1	0	0	1
[truncated: 11 more columns]
