# Supplementary material for: The ∼16 kDa C-Terminal Sequence of Clathrin Assembly Protein AP180 Is Essential for Efficient Clathrin Binding
Source: PLoS One. 2014 Oct 20;9(10):e110557. doi: 10.1371/journal.pone.0110557 (PMC4203807; doi:10.1371/journal.pone.0110557)
Supplement: Data S2 — Contains the tabulated output of the MaxQuant software from processing the LC-MS/MS data of the tryptic digestion of purified clathrin. (ZIP) [file pone.0110557.s003.zip › txt/summary.txt]

Raw file	Experiment	Enzyme	Enzyme mode	Enzyme first search	Enzyme mode first search	Use enzyme first search	Variable modifications	Variable modifications first search	Use variable modifications first search	Multiplicity	Max. missed cleavages	Labels0	LC-MS run type	Time-dependent recalibration	MS	MS/MS	MS/MS Submitted	MS/MS Submitted (SIL)	MS/MS Submitted (ISO)	MS/MS Submitted (PEAK)	MS/MS Identified	MS/MS Identified (SIL)	MS/MS Identified (ISO)	MS/MS Identified (PEAK)	MS/MS Identified [%]	MS/MS Identified (SIL) [%]	MS/MS Identified (ISO) [%]	MS/MS Identified (PEAK) [%]	Peptide Sequences Identified	Peaks	Peaks Sequenced	Peaks Sequenced [%]	Peaks Repeatedly Sequenced	Peaks Repeatedly Sequenced [%]	Isotope Patterns	Isotope Patterns Sequenced	Isotope Patterns Sequenced (z>1)	Isotope Patterns Sequenced [%]	Isotope Patterns Sequenced (z>1) [%]	Isotope Patterns Repeatedly Sequenced	Isotope Patterns Repeatedly Sequenced [%]	Recalibrated	Av. Absolute Mass Deviation [ppm]	Mass Standard Deviation [ppm]	Av. Absolute Mass Deviation [mDa]	Mass Standard Deviation [mDa]	Label free norm param
20140904-PurClathDigest-1ug-01	1	Trypsin/P	Specific			False	Acetyl (Protein N-term);Oxidation (M);Deamidation (NQ)		False	1	2		Standard		3784	7059	7346	6772	0	574	1764	1741	0	23	24.01	25.71	NaN	4.01	848	542520	5504	1.01	849	15.43	43422	4972	4883	11.45	14.8	958	19.27	+	0.63097	0.88214	0.44497	0.67704
20140904-PurClathDigest-1ug-02	2	Trypsin/P	Specific			False	Acetyl (Protein N-term);Oxidation (M);Deamidation (NQ)		False	1	2		Standard		3583	6320	6590	6050	0	540	1662	1629	0	33	25.22	26.93	NaN	6.11	839	555874	5142	0.93	697	13.56	42736	4681	4618	10.95	14.02	788	16.83	+	0.65834	0.90566	0.46001	0.67757
20140904-PurClathDigest-1ug-03	3	Trypsin/P	Specific			False	Acetyl (Protein N-term);Oxidation (M);Deamidation (NQ)		False	1	2		Standard		3434	6127	6380	5874	0	506	1667	1641	0	26	26.13	27.94	NaN	5.14	850	548874	5057	0.92	640	12.66	43635	4605	4551	10.55	13.64	733	15.92	+	0.677	0.89807	0.46263	0.6588
1																													848
2																													839
3																													850
Total															10801	19506	20316	18696	0	1620	5093	5011	0	82	25.07	26.8	NaN	5.06	1023	1647268					129793	14258	14052	10.99	14.15	2479	17.39		0.65525	0.89521	0.45578	0.67122
